# Supplementary material for: Transcriptomic analysis of seed germination improvement of Andrographis paniculata responding to air plasma treatment
Source: PubMed Central journal article supplement (PMC7580921; doi:10.1371/journal.pone.0240939), 2020-10-22
Supplement: pone.0240939.s003.pdf [file pone.0240939.s003.pdf]

**S1 Table. Gene names with the corresponding primers for qPCR analysis.**

| <b>ID</b>       | <b>Gene name</b>                         | <b>Gene fuction description</b>               | <b>Forward primer</b> | <b>Reverse primer</b>  |
|-----------------|------------------------------------------|-----------------------------------------------|-----------------------|------------------------|
| c21161.graph_c0 | <i>NCED5</i>                             | 9-cis-epoxycarotenoid dioxygenase, NCED5      | TCATGCCGTCACCGTCAAA   | TTAACGGCGTCTACGTCAG    |
| c41899.graph_c0 | <i>CYP707A1</i>                          | CYP707A1                                      | AACAGCCTCTCTGAAAGTGA  | GGTTTGAGTTGGGCAGATAC   |
| c41142.graph_c0 | <i>GA20OX</i>                            | gibberelin 20-oxidase, GA20OX                 | CCAAGGTCCTGGTGAAGT    | AAACGCTGTCTGTTTCAGT    |
| c37960.graph_c0 | <i>GA2OX1</i>                            | Gibberellin 2-beta-dioxygenase1, GA2OX1       | ATGGTGGTCCAGTCGAAGA   | AATGGCGGGATGAATGTC     |
| c43253.graph_c1 | <i>ERF098</i>                            | Ethylene-responsive transcription factor, ERF | AACAACCGCAGAGAGAATC   | AGGCTTTCAATTTCTTCCCA   |
| c27911.graph_c0 | <i>NRT1</i>                              | NRT1/PTR FAMILY 6.3-like                      | GAATGTATCGCCTACGAAGC  | GCCAATACTGTCACCAACT    |
| c42797.graph_c0 | <i>WRKY33</i>                            | WRKY transcription factor 33                  | TTCTACTTCGGCCATGTTCTC | GTGTGTGTGTGTTTCGTTAGTT |
| c41362.graph_c0 | <i>GID1B</i>                             | Gibberellin receptor GID1B                    | AAATTCCCGAAGAGTTTGGTC | TCGTGGCCTTCTCCAGGTA    |
| c42159.graph_c0 | <i>SRK2E</i>                             | SRK2E isoform X1                              | CAAACCTCCATACACCCTG   | CAAACCTCCATACACCCTG    |
| c40439.graph_c0 | <i>GAMYB</i>                             | transcription factor GAMYB-like isoform X1    | CCTTGGGTCTTTACTCCT    | CTCAAACCTTCTCGGCACT    |
| c21137.graph_c0 | <i>L484_018717</i>                       | Wound-induced protein L484_018717             | GATAGCCGCAGTGAGCAT    | TTAGCGAGTCTTCCGATT     |
| c40715.graph_c2 | <i>LOC105174779</i>                      | Wound-induced protein LOC105174779            | TATGTCTGGGTCGTCGTT    | GATTGCTGGTAAGATTAGGG   |
| c27825.graph_c0 | <i>BAS1</i>                              | 2-Cys peroxiredoxin BAS1, chloroplastic-like  | GTCTACGGATACACCCAATA  | TGCTTCTGAACTCCCACT     |
| c46740.graph_c0 | <i><math>\beta</math>-glucosidase 44</i> | Beta-glucosidase 44                           | GACAACTATGCTGCTCAACG  | AGGCAAATCCACAGTCCC     |
| c47954.graph_c0 | <i>S11</i>                               | 40S ribosomal protein S11                     | TACAGTTCCGTGTGCAGAT   | CGCTGCTTCTGGAAAGAC     |
| c46166.graph_c0 | <i>S18</i>                               | 40S ribosomal protein S18                     | CGCTGAAGCTCATCATCG    | CGTGTACTTTCCGTCCTTG    |
|                 | <i>GAPDH</i>                             |                                               | GATGCTCCCATGTTTGTGG   | CCACCTCTCCAGTCCTTC     |

Transcriptomic analysis of seed germination improvement of *Andrographis paniculata* responding to air plasma treatment

Jia-Yun Tong 1\*, Rui He 2\*, Xiao-Ting Tang 2, Ming-Zhi Li 3 and Jing-Lin Wan 4
