# Supplementary material for: Transcriptomic analysis of seed germination improvement of Andrographis paniculata responding to air plasma treatment
Source: PubMed Central journal article supplement (PMC7580921; doi:10.1371/journal.pone.0240939), 2020-10-22
Supplement: pone.0240939.s004.pdf [file pone.0240939.s004.pdf]

**S2 Table. A summary of the high-throughput RNA-seq quality data for plasma treated groups.**

| Samples | Read number | Base number    | GC content | % $\geq$ Q30 |
|---------|-------------|----------------|------------|--------------|
| 0 h-1   | 21,307,771  | 5,312,610,744  | 53.44%     | 85.11%       |
| 0 h-2   | 21,377,437  | 5,332,029,262  | 53.74%     | 85.02%       |
| 0 h-3   | 16,310,466  | 4,068,149,700  | 53.36%     | 85.06%       |
| 28 h-1  | 29,289,465  | 7,305,114,988  | 50.05%     | 86.28%       |
| 28 h-2  | 32,398,245  | 8,078,339,204  | 50.00%     | 86.25%       |
| 28 h-3  | 36,051,611  | 8,985,250,144  | 49.99%     | 86.40%       |
| 48 h-1  | 23,207,149  | 5,787,809,202  | 50.63%     | 86.55%       |
| 48 h-2  | 21,948,975  | 5,474,104,454  | 49.96%     | 85.88%       |
| 48 h-3  | 26,037,677  | 6,495,254,468  | 50.14%     | 86.04%       |
| Total   | 227,928,796 | 56,838,662,166 |            |              |

Transcriptomic analysis of seed germination improvement of *Andrographis paniculata* responding to air plasma treatment  
Jia-Yun Tong 1\*, Rui He 2\*, Xiao-Ting Tang 2, Ming-Zhi Li 3 and Jing-Lin Wan 4
