# Supplementary material for: Transcriptomic analysis of seed germination improvement of Andrographis paniculata responding to air plasma treatment
Source: PubMed Central journal article supplement (PMC7580921; doi:10.1371/journal.pone.0240939), 2020-10-22
Supplement: pone.0240939.s005.pdf [file pone.0240939.s005.pdf]

**S3 Table. Assembly results of the RNA sequencing data.**

| <b>Length range</b> | <b>Contig</b>      | <b>Transcript</b> | <b>Unigene</b> |
|---------------------|--------------------|-------------------|----------------|
| 201-300             | 1,782,060(95.85%)* | 41,460(7.16%)     | 36,434(42.99%) |
| 301-500             | 32,250(1.73%)      | 28,789(4.97%)     | 19,811(23.38%) |
| 501-1000            | 23,514(1.26%)      | 38,952(6.73%)     | 12,735(15.03%) |
| 1001-2000           | 13,238(0.71%)      | 96,026(16.58%)    | 7,936(9.36%)   |
| 2001+               | 8,222(0.44%)       | 373,982(64.57%)   | 7,833(9.24%)   |
| Total Number        | 1,859,284          | 579,209           | 84,749         |
| Total Length        | 165,679,144        | 1,790,544,098     | 64,241,916     |
| N50 Length          | 216                | 4,309             | 1,620          |
| Mean Length         | 89.11              | 3091.36           | 758.03         |

Transcriptomic analysis of seed germination improvement of *Andrographis paniculata* responding to air plasma treatment  
Jia-Yun Tong 1\*, Rui He 2\*, Xiao-Ting Tang 2, Ming-Zhi Li 3 and Jing-Lin Wan 4
