# Supplementary material for: Transcriptomic analysis of seed germination improvement of Andrographis paniculata responding to air plasma treatment
Source: PubMed Central journal article supplement (PMC7580921; doi:10.1371/journal.pone.0240939), 2020-10-22
Supplement: pone.0240939.s006.pdf [file pone.0240939.s006.pdf]

**S4 Table. Differentially expressed genes of plasma-treated groups (28 HAS vs. 0 HAS).**

| #ID             | 0 h-1<br>FPKM | 0 h-2<br>FPKM | 0 h-3<br>FPKM | 28 h-1<br>FPKM | 28 h-2<br>FPKM | 28 h-3<br>FPKM | FDR       | log2FC   | regulated | nr_annotation                                                             |
|-----------------|---------------|---------------|---------------|----------------|----------------|----------------|-----------|----------|-----------|---------------------------------------------------------------------------|
| c13791.graph_c0 | 0             | 0             | 0             | 35.2465444     | 32.5315321     | 29.7195888     | 5.414E-43 | Inf      | up        | --                                                                        |
| c13810.graph_c0 | 2.08421284    | 1.25177992    | 1.60697761    | 23.0248669     | 23.3423675     | 24.5563808     | 7.216E-19 | 2.75492  | up        | PREDICTED: SNF2 domain-containing protein CLASSY 3-like [Sesamum indicum] |
| c13899.graph_c0 | 1.02487953    | 0.92331521    | 0.92190754    | 0.37243827     | 0.23539378     | 0.12156263     | 1.445E-12 | -3.06885 | down      | -                                                                         |
| c13905.graph_c0 | 33.5266557    | 27.6762916    | 27.9760259    | 23.101163      | 16.7865524     | 22.530054      | 2.852E-23 | -1.6025  | down      | PREDICTED: monothiol glutaredoxin-S4-like [Sesamum indicum]               |
| c13919.graph_c0 | 18.3674562    | 18.7499246    | 16.8258357    | 19.1649246     | 17.5428077     | 19.7367671     | 1.188E-06 | -1.02352 | down      | -                                                                         |
| c13925.graph_c0 | 0             | 0             | 0             | 5.90772173     | 8.97101801     | 6.5736173      | 1.159E-14 | Inf      | up        | PREDICTED: homeobox-leucine zipper protein HOX21-like [Sesamum indicum]   |
| c13954.graph_c0 | 30.8512077    | 29.2567268    | 34.4285729    | 0              | 0.79916041     | 1.20372109     | 1.261E-58 | -6.64825 | down      | flavin-containing monooxygenase family protein FMO1 [Gossypium hirsutum]  |
| c14063.graph_c0 | 0.68622231    | 0.68690946    | 1.17576379    | 6.42823566     | 5.55391762     | 5.42626324     | 5.255E-06 | 1.67327  | up        | PREDICTED: zinc finger protein ZAT5 [Sesamum indicum]                     |
| c14220.graph_c0 | 75.8344644    | 85.6198711    | 65.9489167    | 61.0121875     | 66.8929173     | 53.0277762     | 4.45E-16  | -1.41918 | down      | PREDICTED: transcription factor GTE7-like [Sesamum indicum]               |
| c14260.graph_c0 | 44.0279329    | 43.5981275    | 43.8020415    | 22.7091437     | 25.7856195     | 23.0929035     | 1.259E-56 | -1.96735 | down      | -                                                                         |
| c14261.graph_c0 | 0.13025651    | 0             | 0             | 24.2354383     | 29.2334232     | 21.4754128     | 7.233E-39 | 8.10824  | up        | PREDICTED: probable mitochondrial chaperone BCS1-B [Sesamum indicum]      |
| c14340.graph_c0 | 3.26653414    | 3.38255698    | 4.92135426    | 22.1036727     | 22.4707163     | 21.7105013     | 1.477E-09 | 1.4219   | up        | -                                                                         |
| c14382.graph_c0 | 61.137143     | 69.9492103    | 62.8952639    | 12.7492075     | 15.4365169     | 14.87153       | 1.96E-114 | -3.26201 | down      | PREDICTED: protein SHORT INTERNODES [Sesamum indicum]                     |
| c14398.graph_c0 | 3.61799512    | 5.94980099    | 6.64180996    | 27.7979732     | 26.116489      | 26.5144933     | 6.985E-05 | 1.21409  | up        | --                                                                        |
| c14444.graph_c0 | 1.00984902    | 0.44927122    | 1.00931909    | 9.54138186     | 9.20403123     | 10.1147421     | 5.595E-10 | 2.45526  | up        | hypothetical protein PHAVU_001G014100g [Phaseolus vulgaris]               |
| c14524.graph_c0 | 2.37243356    | 1.65684362    | 1.91428182    | 0.16039731     | 0.07241186     | 0.13088289     | 4.888E-28 | -5.11782 | down      | hypothetical protein MIMGU_mgv1a007850mg [Erythranthe outtata]            |
| c14644.graph_c0 | 0.63711619    | 0.3826525     | 0.81871952    | 24.0324181     | 35.7051317     | 36.6889393     | 1.081E-21 | 4.61779  | up        | -                                                                         |
| c14914.graph_c0 | 38.4457824    | 40.0916187    | 43.1551146    | 39.4124685     | 37.2115093     | 37.2210028     | 4.835E-23 | -1.18824 | down      | PREDICTED: uncharacterized protein LOC105172581 [Sesamum indicum]         |
| c14919.graph_c0 | 65.4938286    | 66.8890088    | 73.0018135    | 1.55945597     | 0.93869502     | 1.39369414     | 1.54E-213 | -6.81272 | down      | hypothetical protein MIMGU_mgv1a025595mg [Erythranthe outtata]            |
| c14921.graph_c0 | 2.11867605    | 1.749658      | 1.70161412    | 0              | 0.03475831     | 0              | 6.326E-36 | -8.42225 | down      | -                                                                         |
| c14990.graph_c0 | 27.6138836    | 31.9065371    | 27.3760719    | 15.8753762     | 14.6171165     | 18.7435751     | 4.561E-39 | -1.90849 | down      | PREDICTED: F-box protein SKIP1 [Sesamum indicum]                          |
| c15003.graph_c0 | 9.23689238    | 13.4993669    | 10.6827952    | 5.77345533     | 6.18272863     | 8.32658192     | 1.792E-08 | -1.80996 | down      | -                                                                         |
| c15072.graph_c0 | 3.61535952    | 2.37310148    | 3.35112664    | 1.46457645     | 1.71130911     | 1.79262364     | 6.155E-09 | -2.00068 | down      | hypothetical protein MIMGU_mgv1a012722mg [Erythranthe outtata]            |
| c15088.graph_c0 | 35.864785     | 35.6411751    | 38.2027904    | 13.3786168     | 12.5333318     | 11.1218531     | 2.98E-101 | -2.65884 | down      | PREDICTED: uncharacterized protein LOC105156392 [Sesamum indicum]         |
| c15089.graph_c0 | 17.7664581    | 18.5101362    | 11.6482663    | 8.82797423     | 7.97083303     | 7.41858637     | 2.407E-09 | -2.07049 | down      | hypothetical protein MIMGU_mgv1a022555mg [Erythranthe outtata]            |

| #ID             | 0 h-1<br>FPKM | 0 h-2<br>FPKM | 0 h-3<br>FPKM | 28 h-1<br>FPKM | 28 h-2<br>FPKM | 28 h-3<br>FPKM | FDR       | log2FC   | regulated | nr_annotation                                                                                                      |
|-----------------|---------------|---------------|---------------|----------------|----------------|----------------|-----------|----------|-----------|--------------------------------------------------------------------------------------------------------------------|
| c15094.graph_c0 | 13.2998175    | 15.4867083    | 14.4748544    | 17.4583962     | 12.9134337     | 14.3263941     | 3.521E-07 | -1.04406 | down      | -                                                                                                                  |
| c15121.graph_c0 | 4.43412995    | 1.47952335    | 1.50364747    | 0              | 0              | 0              | 2.188E-06 | -Inf     | down      | PREDICTED: oxygen-evolving enhancer protein 1, chloroplastic [Elaeis guineensis]                                   |
| c15133.graph_c0 | 0.68325502    | 0.78916061    | 1.41832344    | 6.11182535     | 5.69085542     | 5.01836958     | 2.582E-06 | 1.43966  | up        | PREDICTED: uncharacterized protein LOC105171932 [Sesamum indicum]                                                  |
| c15145.graph_c0 | 1.4974279     | 1.32691929    | 1.45107689    | 0.03568269     | 0              | 0.02911678     | 3.083E-48 | -7.13041 | down      | PREDICTED: cucumisin-like [Sesamum indicum]                                                                        |
| c15147.graph_c0 | 2.4447761     | 1.34094475    | 1.63537116    | 0              | 0              | 0              | 1.033E-21 | -Inf     | down      | UPF0012 hydrolase C26A3.11 [Taphrina deformans PYCC 5710]                                                          |
| c15152.graph_c0 | 0.14374472    | 0             | 0             | 16.6111811     | 22.2616857     | 16.6235515     | 3.181E-28 | 7.53284  | up        | cytochrome P450 98A3 [Sesamum indicum]                                                                             |
| c15159.graph_c0 | 0             | 0             | 0             | 1.31330477     | 2.96447768     | 2.80519091     | 1.496E-07 | Inf      | up        | PREDICTED: probable xyloglucan endotransglucosylase/hydrolase protein 23 [Sesamum indicum]                         |
| c15161.graph_c0 | 2.07852285    | 2.68465055    | 2.0678587     | 10.7695327     | 10.2518717     | 10.418176      | 2.127E-05 | 1.11271  | up        | PREDICTED: transmembrane protein 184A-11ke [Sesamum indicum]                                                       |
| c15169.graph_c0 | 6.98435129    | 7.34091231    | 7.2549274     | 7.36047008     | 6.64581437     | 6.6964379      | 2.519E-09 | -1.15091 | down      | PREDICTED: uncharacterized protein LOC105156896 isoform X1 [Sesamum indicum]                                       |
| c15170.graph_c0 | 1.59297725    | 1.01472787    | 0.18609444    | 12.840685      | 15.6803215     | 13.6556161     | 5.79E-12  | 2.84372  | up        | hypothetical protein MIMGU_mgv1a006023mg [Erythranthe ontata]                                                      |
| c15173.graph_c0 | 1.22328875    | 1.34696506    | 0.94318469    | 12.0914773     | 15.0115217     | 15.4527534     | 2.459E-12 | 2.51182  | up        | BnaC09g03800D [Brassica napus]                                                                                     |
| c15187.graph_c1 | 4.64768984    | 3.48925785    | 1.82492       | 14.82529       | 15.3344196     | 12.9395338     | 0.0013104 | 1.03227  | up        | hypothetical protein MIMGU_mgv1a005900mg [Erythranthe ontata]                                                      |
| c15220.graph_c0 | 2.54410705    | 1.99737615    | 2.05131187    | 0              | 0              | 0              | 1.046E-43 | -Inf     | down      | malate dehydrogenase [Symphyocladia latiuscula]                                                                    |
| c15238.graph_c0 | 25.807402     | 24.5196894    | 24.7321265    | 17.3487853     | 16.8535032     | 17.2694076     | 1.907E-44 | -1.6343  | down      | PREDICTED: uncharacterized protein LOC105180187 [Sesamum indicum]                                                  |
| c15278.graph_c0 | 29.8150822    | 27.094252     | 25.9543478    | 19.8220361     | 18.2130121     | 17.1116882     | 2.212E-47 | -1.67685 | down      | hypothetical protein MIMGU_mgv1a025352mg [Erythranthe ontata]                                                      |
| c15296.graph_c0 | 7.67964238    | 3.52336068    | 6.44203183    | 0              | 0              | 0              | 1.262E-16 | -Inf     | down      | unnamed protein product [Chondrus crispus]                                                                         |
| c15303.graph_c0 | 0.7314863     | 1.00680081    | 0.70499164    | 18.7403109     | 17.8807859     | 18.5455451     | 4.409E-27 | 3.40789  | up        | hypothetical protein MIMGU_mgv1a012143mg [Erythranthe ontata]                                                      |
| c15307.graph_c0 | 130.942733    | 103.676379    | 112.1313      | 82.8784619     | 84.0075841     | 86.3030312     | 3.759E-21 | -1.5426  | down      | PREDICTED: zinc finger A20 and AN1 domain-containing stress-associated protein 8-like isoform X2 [Sesamum indicum] |
| c15329.graph_c0 | 0.5199872     | 0.20820316    | 0             | 79.2128082     | 79.0970376     | 69.1393914     | 4.75E-153 | 7.22094  | up        | PREDICTED: dof zinc finger protein DOF3.1-like isoform X1 [Sesamum indicum]                                        |
| c15339.graph_c0 | 252.184041    | 235.786193    | 251.24662     | 25.5104477     | 29.2313229     | 30.848277      | 0         | -4.20071 | down      | hypothetical protein ZEAMMB73_313798 [Zea mays]                                                                    |
| c15356.graph_c0 | 0.08034583    | 0.08042628    | 0.10324757    | 4.0292469      | 4.16528321     | 2.85898484     | 5.325E-12 | 4.29204  | up        | PREDICTED: putative late blight resistance protein homolog R1B-19 isoform X1 [Sesamum indicum]                     |
| c15361.graph_c0 | 1.23328096    | 1.23451591    | 1.30514166    | 7.69799168     | 7.04577795     | 6.19545043     | 3.169E-05 | 1.38041  | up        | hypothetical protein MIMGU_mgv1a0145/2mg [Erythranthe ontata]                                                      |
| c15363.graph_c0 | 0.38282205    | 0             | 0.24597075    | 16.9722045     | 14.4450457     | 12.7140016     | 1.714E-17 | 5.04505  | up        | PREDICTED: GTP-binding protein SAR1A-like [Elaeis guineensis]                                                      |
| c15363.graph_c1 | 1.43603069    | 0.47915622    | 0.92267815    | 23.6571735     | 25.7578998     | 24.4139587     | 1.188E-16 | 3.61491  | up        | PREDICTED: GTP-binding protein SAR1A-like [Sesamum indicum]                                                        |
| c15371.graph_c0 | 33.9535964    | 34.6334408    | 21.0903899    | 12.2214074     | 3.7576486      | 19.3233463     | 1.325E-07 | -2.42442 | down      | PREDICTED: protein notum homolog isoform X1 [Sesamum indicum]                                                      |

| #ID             | 0 h-1<br>FPKM | 0 h-2<br>FPKM | 0 h-3<br>FPKM | 28 h-1<br>FPKM | 28 h-2<br>FPKM | 28 h-3<br>FPKM | FDR       | log2FC   | regulated | nr_annotation                                                                                     |
|-----------------|---------------|---------------|---------------|----------------|----------------|----------------|-----------|----------|-----------|---------------------------------------------------------------------------------------------------|
| c15380.graph_c0 | 22.647299     | 23.528688     | 24.8034169    | 20.2008187     | 19.4216316     | 16.9415837     | 6.275E-26 | -1.41987 | down      | PREDICTED: uncharacterized protein LOC105168435 [Sesamum indicum]                                 |
| c15395.graph_c0 | 4.04650337    | 1.53641754    | 2.779266      | 0              | 0              | 0              | 1.519E-11 | -Inf     | down      | --                                                                                                |
| c15399.graph_c0 | 3.69184075    | 4.83262605    | 4.92662928    | 0.10320033     | 0.09318022     | 0              | 8.004E-32 | -7.1985  | down      | -                                                                                                 |
| c15416.graph_c0 | 3.14448248    | 1.41643404    | 1.91937263    | 0              | 0              | 0              | 2.524E-12 | -Inf     | down      | predicted protein [Physcomitrella patens]                                                         |
| c15439.graph_c0 | 23.5591092    | 24.6669622    | 30.6223695    | 21.7477016     | 28.2547108     | 21.0381814     | 3.746E-06 | -1.24551 | down      | -                                                                                                 |
| c15446.graph_c0 | 4.90674413    | 3.91113467    | 2.80238243    | 28.0012219     | 30.6490418     | 33.3031577     | 3.726E-21 | 1.90079  | up        | PREDICTED: UPF0329 protein ECU05_1680/ECU11_0050-like isoform X2 [Sesamum indicum]                |
| c15446.graph_c1 | 0.46345301    | 1.15979273    | 2.08444416    | 13.3049817     | 12.3172814     | 13.1930205     | 1.522E-07 | 2.28188  | up        | -                                                                                                 |
| c15451.graph_c0 | 2.29466803    | 1.62468312    | 2.22953457    | 0.04067687     | 0.11018219     | 0.09957597     | 2.38E-30  | -5.70827 | down      | -                                                                                                 |
| c15452.graph_c0 | 0.58381897    | 0.19480119    | 0             | 12.022294      | 7.91776786     | 7.15559781     | 1.448E-07 | 4.05529  | up        | -                                                                                                 |
| c15456.graph_c0 | 1.56347764    | 1.02068036    | 1.04824209    | 5.08876666     | 5.57606697     | 5.76497148     | 0.0018607 | 1.09145  | up        | hypothetical protein MIMGU_mgv1a022502mg, partial [Erythranthe guttata]                           |
| c15476.graph_c0 | 1.60801872    | 1.463299      | 1.7845903     | 0.10624534     | 0.19185916     | 0.13004299     | 5.108E-20 | -4.59702 | down      | -                                                                                                 |
| c15480.graph_c1 | 2.10475236    | 0.52671499    | 2.70469011    | 13.767497      | 15.5384487     | 14.3547665     | 3.739E-06 | 1.93459  | up        | -                                                                                                 |
| c15485.graph_c0 | 1.7698855     | 0.61622879    | 0.69220046    | 5.87243353     | 5.35275456     | 6.25223351     | 0.0002168 | 1.42612  | up        | hypothetical protein MIMGU_mgv1a01318/mg [Erythranthe guttata]                                    |
| c15487.graph_c0 | 4.77082613    | 4.77560339    | 5.50191067    | 4.88993568     | 4.49542896     | 5.58620661     | 0.0007425 | -1.09894 | down      | hypothetical protein MIMGU_mgv1a022391mg, partial [Erythranthe guttata]                           |
| c15495.graph_c0 | 15.5429054    | 10.3723128    | 16.3114865    | 57.9886695     | 63.5779741     | 59.7623741     | 6.973E-07 | 1.00985  | up        | hypothetical protein M569_09676, partial [Genlisea aurea]                                         |
| c15497.graph_c0 | 3.29711056    | 4.28560976    | 3.66777942    | 3.32623654     | 3.45538636     | 3.29787688     | 4.164E-07 | -1.24983 | down      | -                                                                                                 |
| c15500.graph_c0 | 1.76409036    | 1.47154736    | 2.26692596    | 8.97491495     | 10.611735      | 8.54403353     | 0.0007412 | 1.25848  | up        | -                                                                                                 |
| c15510.graph_c0 | 0.17067871    | 0.85424809    | 0.4386578     | 4.58978716     | 4.48015943     | 4.65623045     | 1.371E-05 | 2.13574  | up        | -                                                                                                 |
| c15525.graph_c0 | 13.7003403    | 7.67642305    | 9.63318703    | 0              | 0              | 0              | 7.964E-29 | -Inf     | down      | --                                                                                                |
| c15553.graph_c0 | 8.10423045    | 4.5333696     | 5.20712849    | 0              | 0              | 0              | 8.707E-18 | -Inf     | down      | hypothetical protein OUDMADRAF1_111959 [Oridiodendron maus 7n1]                                   |
| c15569.graph_c0 | 0             | 0             | 0             | 12.4446714     | 13.764555      | 10.4932419     | 6.856E-23 | Inf      | up        | PREDICTED: CDGSH iron-sulfur domain-containing protein NEET [Sesamum indicum]                     |
| c15575.graph_c0 | 0             | 0             | 0.09336734    | 5.59752189     | 8.58232774     | 9.04888445     | 9.936E-17 | 6.82947  | up        | PREDICTED: probable LRR receptor-like serine/threonine-protein kinase At4g30520 [Sesamum indicum] |
| c15576.graph_c0 | 13.9419651    | 13.4223169    | 13.0681245    | 9.59649012     | 8.77236723     | 9.2654675      | 1.344E-38 | -1.63872 | down      | PREDICTED: uncharacterized protein LOC105180173 [Sesamum indicum]                                 |
| c15577.graph_c0 | 0.19460632    | 0.58440357    | 1.00030732    | 15.9825791     | 17.240301      | 18.6968846     | 5.161E-16 | 3.76069  | up        | PREDICTED: uncharacterized protein LOC103494735 isoform X1 [Cucumis melo]                         |
| c15590.graph_c1 | 4.87900989    | 7.32584322    | 5.82188367    | 0              | 0              | 0.10334059     | 1.915E-31 | -8.52369 | down      | PREDICTED: cirhin-like [Phoenix dactylifera]                                                      |

| #ID             | 0 h-1<br>FPKM | 0 h-2<br>FPKM | 0 h-3<br>FPKM | 28 h-1<br>FPKM | 28 h-2<br>FPKM | 28 h-3<br>FPKM | FDR       | log2FC   | regulated | nr_annotation                                                                                            |
|-----------------|---------------|---------------|---------------|----------------|----------------|----------------|-----------|----------|-----------|----------------------------------------------------------------------------------------------------------|
| c15640.graph_c0 | 2.48649798    | 1.42227876    | 1.27809934    | 0              | 0              | 0              | 9.703E-14 | -Inf     | down      | -                                                                                                        |
| c15678.graph_c0 | 3.42647893    | 3.0215874     | 4.08864957    | 21.4051094     | 19.0055857     | 19.4501124     | 3.248E-11 | 1.4127   | up        | PREDICTED: uncharacterized protein LOC105165199 [Sesamum indicum]                                        |
| c15749.graph_c0 | 26.6632874    | 22.8771314    | 15.9895773    | 7.56693018     | 9.16518455     | 10.9937167     | 1.291E-09 | -2.32422 | down      | hypothetical protein MIMGU_mgv1a004686mg [Erythranthe                                                    |
| c15817.graph_c0 | 14.6969744    | 6.85593374    | 8.61797199    | 0              | 0              | 0              | 1.117E-15 | -Inf     | down      | hypothetical protein MIMGU_mgv1a01615/mg [Erythranthe<br>outfata]                                        |
| c15957.graph_c0 | 0.10804568    | 0             | 0.13884298    | 6.20363146     | 6.52303007     | 5.25434474     | 1.21E-14  | 5.08612  | up        | -                                                                                                        |
| c15999.graph_c0 | 12.694969     | 11.1579639    | 11.3398982    | 2.36291752     | 1.32073374     | 0.91815305     | 5.705E-38 | -4.02668 | down      | hypothetical protein EUTSA_v10020227mg [Eutrema salsugineum]                                             |
| c16017.graph_c0 | 8.69616319    | 9.2939225     | 9.07436625    | 2.89879397     | 4.03327675     | 3.10215372     | 1.343E-33 | -2.52322 | down      | PREDICTED: uncharacterized protein LOC105174057 [Sesamum indicum]                                        |
| c16072.graph_c0 | 10.3328465    | 9.14398248    | 9.04451438    | 4.35353814     | 4.86441049     | 3.77447979     | 3.256E-26 | -2.22451 | down      | hypothetical protein MIMGU_mgv1a016/41mg [Erythranthe<br>outfata]                                        |
| c16076.graph_c0 | 16.9084791    | 16.2891168    | 15.0299398    | 12.8433755     | 13.2649055     | 13.9483206     | 2.362E-12 | -1.35662 | down      | PREDICTED: dof zinc finger protein DOF3.1-like [Solanum lycopersicum]                                    |
| c16083.graph_c0 | 9.01720259    | 10.7025322    | 5.62819599    | 39.6963996     | 43.7882588     | 41.7122596     | 7.3E-10   | 1.21959  | up        | PREDICTED: phosphoglycerate kinase, chloroplastic-like [Fragaria vesca subsp. vesca]                     |
| c16084.graph_c0 | 0             | 0             | 0             | 5.21243168     | 4.377988       | 5.63809759     | 2.557E-14 | Inf      | up        | acetylmalan acetylerase [Striga asiatica]                                                                |
| c16100.graph_c0 | 44.676479     | 46.7279369    | 38.8260588    | 39.1312449     | 41.0638733     | 40.5928485     | 4.827E-22 | -1.19718 | down      | hypothetical protein M569_09334 [Genlisea aurea]                                                         |
| c16107.graph_c0 | 3.23517637    | 3.65627602    | 5.90072605    | 26.3194747     | 23.2161444     | 21.7859357     | 7.154E-09 | 1.37999  | up        | Fructose-bisphosphate aldolase, chloroplast precursor, putative, expressed [Oryza sativa Japonica Group] |
| c16116.graph_c0 | 1.48219569    | 1.48367989    | 1.90468014    | 30.163036      | 28.2444602     | 28.4331831     | 9.75E-59  | 3.06212  | up        | PREDICTED: transcription repressor ORF6-like [Sesamum indicum]                                           |
| c16134.graph_c0 | 0             | 0             | 0             | 3.85468682     | 3.80876237     | 3.32343408     | 2.221E-14 | Inf      | up        | PREDICTED: uncharacterized protein LOC104223573 [Nicotiana sylvestris]                                   |
| c16163.graph_c0 | 14.1685582    | 17.6940082    | 16.9697786    | 10.2976265     | 12.6377745     | 11.4620433     | 3.636E-15 | -1.59794 | down      | PREDICTED: xyloglucan galactosyltransferase KATAMARI1 homolog [Sesamum indicum]                          |
| c16187.graph_c0 | 3.87316065    | 3.55395245    | 2.40562964    | 18.532023      | 15.8007325     | 15.9642163     | 2.37E-09  | 1.26978  | up        | PREDICTED: uncharacterized protein LOC105171815 [Sesamum indicum]                                        |
| c16231.graph_c0 | 27.5459711    | 15.1503045    | 15.9483978    | 0              | 0              | 0              | 2.287E-19 | -Inf     | down      | -                                                                                                        |
| c16250.graph_c0 | 138.859848    | 149.508724    | 147.58971     | 101.57395      | 98.1395586     | 102.702659     | 4.748E-74 | -1.61863 | down      | hypothetical protein MIMGU_mgv1a014115mg [Erythranthe<br>outfata]                                        |
| c16273.graph_c0 | 5.76379997    | 7.89881818    | 7.23036089    | 62.0385258     | 67.9023939     | 69.0571648     | 3.898E-67 | 2.15942  | up        | 40S ribosomal protein S9-2 [Morus notabilis]                                                             |
| c16382.graph_c0 | 11.9521371    | 9.62192599    | 9.91425535    | 8.77866757     | 9.58627473     | 6.26321788     | 1.976E-15 | -1.44491 | down      | PREDICTED: peroxidase 9 [Sesamum indicum]                                                                |
| c16384.graph_c0 | 1.79710656    | 1.19927073    | 1.15467654    | 0              | 0              | 0              | 1.433E-28 | -Inf     | down      | PREDICTED: L-lactate dehydrogenase A-like [Solanum tuberosum]                                            |
| c16509.graph_c0 | 11.8766476    | 13.4251543    | 14.3275565    | 55.0796089     | 60.9717282     | 65.2605801     | 9.279E-15 | 1.10163  | up        | Peptidylprolyl cis/trans isomerase [Theobroma cacao]                                                     |
| c16681.graph_c0 | 0.78693784    | 1.05030112    | 1.10755545    | 0              | 0              | 0              | 3.577E-31 | -Inf     | down      | --                                                                                                       |
| c16725.graph_c0 | 31.6667139    | 33.0968832    | 32.7139652    | 3.49740559     | 3.15782933     | 2.8538544      | 5.23E-106 | -4.44916 | down      | -                                                                                                        |

| #ID             | 0 h-1<br>FPKM | 0 h-2<br>FPKM | 0 h-3<br>FPKM | 28 h-1<br>FPKM | 28 h-2<br>FPKM | 28 h-3<br>FPKM | FDR       | log2FC   | regulated | nr_annotation                                                                                |
|-----------------|---------------|---------------|---------------|----------------|----------------|----------------|-----------|----------|-----------|----------------------------------------------------------------------------------------------|
| c16744.graph_c0 | 1.77680778    | 1.7172564     | 2.83440209    | 9.79662774     | 8.64440368     | 10.1741414     | 1.065E-05 | 1.08011  | up        | PREDICTED: uncharacterized protein LOC105171253 isoform X1 [Sesamum indicum]                 |
| c16837.graph_c0 | 0.26345674    | 0.5274411     | 0.50782851    | 5.45714688     | 6.56972263     | 4.29674212     | 2.768E-07 | 2.55379  | up        | PREDICTED: uncharacterized protein LOC105156659 [Sesamum indicum]                            |
| c16854.graph_c0 | 1.70989262    | 1.53605561    | 1.29583163    | 0.12746052     | 0              | 0.02600169     | 2.804E-31 | -5.97581 | down      | -                                                                                            |
| c16937.graph_c0 | 0.68840394    | 0.92762556    | 0.61243361    | 0              | 0              | 0              | 7.677E-31 | -Inf     | down      | PREDICTED: subtilisin-like protease [Sesamum indicum]                                        |
| c16945.graph_c0 | 1.10561168    | 0.40437802    | 0.87431064    | 0              | 0              | 0              | 4.046E-11 | -Inf     | down      | polyunsaturated fatty acids delta-5-elongase [Thraustochytrium sp. FJN-10]                   |
| c17004.graph_c0 | 1.26627964    | 0.89954993    | 1.20729186    | 0              | 0              | 0              | 3.591E-32 | -Inf     | down      | PREDICTED: prostaglandin reductase 1-like [Pyrus x bretschneideri]                           |
| c17007.graph_c0 | 18.7777388    | 13.4261013    | 10.7245057    | 9.53162385     | 8.01937884     | 6.89389459     | 4.197E-06 | -1.89744 | down      | -                                                                                            |
| c17223.graph_c0 | 2.33728246    | 2.67385474    | 3.8616435     | 16.0165351     | 11.8320787     | 16.4357127     | 0.0027672 | 1.22331  | up        | -                                                                                            |
| c17325.graph_c0 | 1.40953713    | 0.68826759    | 1.19281457    | 0              | 0              | 0              | 4.079E-16 | -Inf     | down      | unnamed protein product [Chondrus crispus]                                                   |
| c17409.graph_c0 | 0.3694757     | 0.18492283    | 0.71218634    | 4.6993241      | 4.48550901     | 6.35449672     | 4.317E-07 | 2.51592  | up        | -                                                                                            |
| c17428.graph_c0 | 0.60200763    | 1.08469881    | 0.81228382    | 0.02187678     | 0              | 0.01785128     | 1.006E-16 | -7.06326 | down      | gag-pol polymerase [Arabidopsis lyrata subsp. lyrata]                                        |
| c17559.graph_c0 | 0             | 0             | 0             | 31.7446849     | 37.5068947     | 28.8637926     | 3.276E-32 | Inf      | up        | PREDICTED: 3'-hydroxy-N-methyl-(S)-coclaurine 4'-O-methyltransferase-like [Sesamum indicum]  |
| c17663.graph_c0 | 1.29924554    | 0.43351551    | 0.55652732    | 40.6042193     | 39.5038032     | 43.663263      | 2.992E-19 | 4.67624  | up        | -                                                                                            |
| c17703.graph_c0 | 8.90752367    | 6.17292222    | 4.40250792    | 2.20540707     | 2.31244932     | 2.43815982     | 6.669E-06 | -2.56803 | down      | -                                                                                            |
| c17748.graph_c0 | 11.2922392    | 11.5971453    | 13.9456118    | 11.7244777     | 11.6447145     | 10.6977327     | 5.567E-07 | -1.20648 | down      | PREDICTED: ABC transporter B family member 20 [Neimobu nucifera]                             |
| c17782.graph_c0 | 1.51149176    | 1.56181191    | 1.56639255    | 0              | 0              | 0              | 4.809E-35 | -Inf     | down      | --                                                                                           |
| c17811.graph_c0 | 0.19867237    | 0.19887131    | 0             | 2.21404028     | 2.21636109     | 2.00301257     | 1.223E-07 | 2.94559  | up        | PREDICTED: uncharacterized protein LOC105158387 [Sesamum indicum]                            |
| c17821.graph_c0 | 1.76219832    | 0.5039894     | 0.97049769    | 12.4416257     | 12.2248234     | 15.3776955     | 7.156E-08 | 2.54596  | up        | -                                                                                            |
| c17845.graph_c0 | 0.10381222    | 0.20783235    | 0             | 4.1497568      | 3.06559744     | 4.00183451     | 1.46E-10  | 4.09632  | up        | hypothetical protein MIMGU_mgv1a009966mg [Erythranthe onitata]                               |
| c17960.graph_c0 | 76.7099437    | 74.2008113    | 73.5080526    | 42.8775767     | 41.5168167     | 38.6147223     | 3.54E-116 | -1.95789 | down      | PREDICTED: probable ADP-ribosylation factor GTPase-activating protein AGD6 [Sesamum indicum] |
| c18032.graph_c0 | 1.21310507    | 1.05241051    | 0.88336989    | 0              | 0              | 0              | 9.685E-32 | -Inf     | down      | hypothetical protein GUIHDRAFT_137181 [Guillardia theta CCMP2712]                            |
| c18118.graph_c0 | 63.8274276    | 66.1772567    | 60.4518029    | 60.2481379     | 59.1938727     | 61.3509114     | 1.757E-31 | -1.16471 | down      | PREDICTED: E3 ubiquitin-protein ligase A1L42 [Sesamum indicum]                               |
| c18221.graph_c0 | 1.93596322    | 0.81448046    | 1.04559264    | 0              | 0              | 0              | 1.517E-11 | -Inf     | down      | hypothetical protein PHAVU_001G265900g [Phaseolus vulgaris]                                  |
| c18282.graph_c0 | 5.85528607    | 5.86114926    | 6.84024948    | 2.45018713     | 2.09585297     | 2.20978876     | 9.962E-12 | -2.5504  | down      | -                                                                                            |
| c18320.graph_c0 | 2.09189538    | 0.87249587    | 1.45609121    | 0              | 0              | 0              | 1.415E-12 | -Inf     | down      | predicted protein [Physcomitrella patens]                                                    |
| c18333.graph_c0 | 7.39263791    | 6.66003646    | 6.3332216     | 1.43278043     | 0.8085415      | 1.60756356     | 1.901E-16 | -3.49158 | down      | -                                                                                            |

| #ID             | 0 h-1<br>FPKM | 0 h-2<br>FPKM | 0 h-3<br>FPKM | 28 h-1<br>FPKM | 28 h-2<br>FPKM | 28 h-3<br>FPKM | FDR       | log2FC   | regulated | nr_annotation                                                                     |
|-----------------|---------------|---------------|---------------|----------------|----------------|----------------|-----------|----------|-----------|-----------------------------------------------------------------------------------|
| c18333.graph_c1 | 3.97975493    | 5.80962091    | 3.83560699    | 3.25402082     | 2.50280523     | 1.5734841      | 2.803E-07 | -1.98553 | down      | -                                                                                 |
| c18358.graph_c0 | 14.726961     | 13.777297     | 12.5575297    | 91.5296764     | 119.222279     | 90.9309725     | 1.264E-13 | 1.78759  | up        | PREDICTED: protein P21-like [Sesamum indicum]                                     |
| c18381.graph_c0 | 1.52956927    | 2.04146786    | 1.31037138    | 8.89345702     | 8.36453942     | 6.34986476     | 0.0059942 | 1.18475  | up        | --                                                                                |
| c18400.graph_c0 | 3.1384297     | 0.39269655    | 2.01650321    | 15.1115761     | 32.437479      | 16.9841011     | 0.0037218 | 2.45104  | up        | -                                                                                 |
| c18422.graph_c1 | 0.83602348    | 0.74387611    | 0.67642576    | 0              | 0              | 0              | 1.5E-30   | -Inf     | down      | --                                                                                |
| c18557.graph_c0 | 1.32208413    | 1.10284       | 0.28315507    | 17.936485      | 16.6287579     | 18.1643528     | 4.16E-12  | 3.2078   | up        | mitochondrial ATP synthase, beta chain [Plantago major]                           |
| c18610.graph_c0 | 1.10290418    | 1.38001071    | 3.18886995    | 73.7457647     | 82.1462556     | 74.4023193     | 5.18E-46  | 4.23839  | up        | betaine aldehyde dehydrogenase 1 [Jatropha curcas]                                |
| c18652.graph_c0 | 4.00552561    | 3.06498226    | 2.99431893    | 13.898147      | 14.2041948     | 15.4179713     | 6.216E-15 | 1.02546  | up        | unnamed protein product [Coffea canephora]                                        |
| c18653.graph_c1 | 2.80292996    | 3.32531753    | 2.13444502    | 2.33895383     | 2.52060234     | 2.77050082     | 0.0007906 | -1.20107 | down      | unnamed protein product [Coffea canephora]                                        |
| c18663.graph_c0 | 13.4998478    | 10.5211206    | 12.3913135    | 0.28033176     | 0.82261821     | 0.45749685     | 1.137E-77 | -5.63626 | down      | -                                                                                 |
| c18669.graph_c0 | 311.128593    | 341.87719     | 284.800189    | 32.2291542     | 36.9952273     | 36.6958976     | 3.79E-156 | -4.23528 | down      | PREDICTED: uncharacterized protein LOC105174162 [Sesamum indicum]                 |
| c18688.graph_c0 | 13.7462915    | 14.5845603    | 13.1484309    | 9.05949933     | 8.93660734     | 8.77110397     | 1.061E-73 | -1.72183 | down      | PREDICTED: topless-related protein 4-like isoform X5 [Sesamum indicum]            |
| c18696.graph_c0 | 10.3862138    | 11.0746541    | 12.2828289    | 11.596462      | 10.7174641     | 13.3458626     | 1.427E-08 | -1.01199 | down      | BnaC04g40780D [Brassica napus]                                                    |
| c18699.graph_c0 | 18.5435267    | 18.4034449    | 16.2934468    | 13.5925192     | 10.1926398     | 10.7154055     | 4.939E-16 | -1.715   | down      | -                                                                                 |
| c18707.graph_c0 | 0.15319321    | 0.30669323    | 0.19685934    | 2.82061193     | 4.02118123     | 2.99813202     | 1.277E-09 | 2.81314  | up        | PREDICTED: protein kinase PVPK-1 [Sesamum indicum]                                |
| c18710.graph_c0 | 88.4938063    | 51.544474     | 57.3873292    | 0              | 0              | 0              | 1.242E-51 | -Inf     | down      | hypothetical protein CHLNCDRAFT_59390 [Chlorella variabilis]                      |
| c18715.graph_c0 | 0.19385313    | 0.33958268    | 0.24910895    | 6.37533298     | 7.55319274     | 7.17101549     | 3.369E-41 | 3.66115  | up        | PREDICTED: homeobox-leucine zipper protein MERISTEM L1-like [Sesamum indicum]     |
| c18725.graph_c0 | 0.26750845    | 0             | 0.13750358    | 2.33308318     | 2.03633685     | 1.74512875     | 7.8E-08   | 2.83182  | up        | PREDICTED: basic 7S globulin-like [Nelumbo nucifera]                              |
| c18726.graph_c0 | 0.21384123    | 0.07135179    | 0.1831963     | 0.82889905     | 1.61377659     | 1.05683572     | 0.0040785 | 1.80947  | up        | PREDICTED: sulfite reductase 1 [ferredoxin], chloroplastic-like [Sesamum indicum] |
| c18732.graph_c0 | 8.95554731    | 8.0307113     | 10.9088457    | 6.16983808     | 5.99930725     | 6.97089806     | 1.008E-08 | -1.63638 | down      | PREDICTED: uncharacterized protein LOC105163289 [Sesamum indicum]                 |
| c18736.graph_c0 | 34.5668746    | 32.7331572    | 33.0030498    | 12.8870707     | 13.1301004     | 12.7960007     | 1.53E-146 | -2.45993 | down      | PREDICTED: cation/calcium exchanger 3-like [Sesamum indicum]                      |
| c18737.graph_c0 | 1.91235189    | 1.38252604    | 1.91134836    | 0.92659089     | 1.88240557     | 1.260151       | 0.0004921 | -1.4481  | down      | -                                                                                 |
| c18755.graph_c0 | 5.97281527    | 8.56717739    | 6.64569013    | 6.69679848     | 6.1660788      | 6.45808431     | 5.424E-06 | -1.22357 | down      | PREDICTED: uncharacterized protein LOC105174054 [Sesamum indicum]                 |
| c18784.graph_c0 | 16.284431     | 14.8157841    | 16.9835328    | 8.18433504     | 8.71717591     | 8.8978024      | 1.682E-46 | -1.98943 | down      | PREDICTED: probable carboxylesterase 16 [Sesamum indicum]                         |
| c18793.graph_c0 | 13.2742561    | 8.70948543    | 8.02726808    | 0              | 0              | 0              | 5.878E-30 | -Inf     | down      | Ubiquitin-conjugating enzyme [Pestalotiopsis fici W106-1]                         |
| c18797.graph_c0 | 0             | 0             | 0             | 2.60171562     | 2.74062282     | 3.11370209     | 5.951E-12 | Inf      | up        | -                                                                                 |

| #ID             | 0 h-1<br>FPKM | 0 h-2<br>FPKM | 0 h-3<br>FPKM | 28 h-1<br>FPKM | 28 h-2<br>FPKM | 28 h-3<br>FPKM | FDR       | log2FC   | regulated | nr_annotation                                                                    |
|-----------------|---------------|---------------|---------------|----------------|----------------|----------------|-----------|----------|-----------|----------------------------------------------------------------------------------|
| c18808.graph_c0 | 0.32186867    | 0.83769654    | 1.24084197    | 10.8076721     | 10.4342152     | 9.8115838      | 1.732E-17 | 2.5891   | up        | PREDICTED: uncharacterized protein LOC105161274 [Sesamum indicum]                |
| c18817.graph_c0 | 0.34194817    | 0.59900852    | 0.43941694    | 4.59773029     | 4.09522047     | 3.44751764     | 8.075E-06 | 2.044    | up        | hypothetical protein MIMGU_mgv1a015124mg [Erythranthe outtata]                   |
| c18827.graph_c0 | 3.78286749    | 4.13089687    | 2.82829643    | 1.54964282     | 0.496484       | 1.26449588     | 7.799E-18 | -2.78287 | down      | -                                                                                |
| c18840.graph_c0 | 12.3547473    | 12.3334208    | 10.7716853    | 8.0496162      | 8.77025938     | 7.76630943     | 2.181E-40 | -1.61756 | down      | hypothetical protein MIMGU_mgv1a005412mg [Erythranthe outtata]                   |
| c18846.graph_c0 | 5.94156695    | 5.54720292    | 6.75417006    | 25.4115147     | 31.4545695     | 28.9349552     | 1.674E-12 | 1.14102  | up        | PREDICTED: 50S ribosomal protein L17, chloroplastic-like [Sesamum indicum]       |
| c18858.graph_c0 | 1.9472711     | 1.79533513    | 1.18530969    | 0.93109567     | 1.0088305      | 0.63820383     | 1.133E-08 | -2.02119 | down      | PREDICTED: cytochrome P450 71A8-like [Sesamum indicum]                           |
| c18864.graph_c0 | 13.9296556    | 17.5087301    | 13.3234138    | 0.34513614     | 0.46743836     | 1.36120331     | 2.177E-57 | -5.44712 | down      | hypothetical protein MIMGU_mgv1a017080mg [Erythranthe outtata]                   |
| c18867.graph_c0 | 31.4213272    | 21.8243855    | 32.4669263    | 0.9321159      | 1.17825857     | 1.67331771     | 9.952E-30 | -5.5915  | down      | PREDICTED: uncharacterized protein LOC105160499 [Sesamum indicum]                |
| c18869.graph_c0 | 6.22804306    | 5.0797833     | 5.33552127    | 22.2972323     | 25.8541247     | 23.9673066     | 3.673E-13 | 1.02627  | up        | PREDICTED: DNA-directed RNA polymerases II, IV and V subunit 3 [Sesamum indicum] |
| c18874.graph_c0 | 0.22724936    | 0.22747691    | 0.33374219    | 4.05830367     | 3.40862113     | 3.15751742     | 7.104E-13 | 2.65561  | up        | hypothetical protein MIMGU_mgv1a002578mg [Erythranthe outtata]                   |
| c18878.graph_c0 | 8.90314232    | 9.10579785    | 8.45631027    | 86.1594766     | 95.7659144     | 88.4987526     | 6.079E-69 | 2.26302  | up        | 40S ribosomal protein S17-like protein [Solanum tuberosum]                       |
| c18882.graph_c0 | 48.1873733    | 49.5632117    | 52.6200777    | 46.3081627     | 48.9558581     | 46.2097021     | 3.238E-32 | -1.17984 | down      | PREDICTED: 30S ribosomal protein S5, chloroplastic [Sesamum indicum]             |
| c18889.graph_c0 | 10.7276735    | 10.4096887    | 12.5194713    | 9.78579376     | 10.6315189     | 8.30972649     | 1.585E-09 | -1.32229 | down      | histone h4, partial [Cysticapnos vesicaria]                                      |
| c18892.graph_c0 | 1.76071547    | 0.88123928    | 0.67877673    | 5.56659868     | 7.85691804     | 6.63071243     | 0.0001261 | 1.5142   | up        | hypothetical protein CICLE_v10006109mg [Citrus clementina]                       |
| c18903.graph_c0 | 31.8662863    | 27.7924872    | 35.6787195    | 12.8030992     | 14.8036992     | 12.9108982     | 1.514E-20 | -2.32748 | down      | PREDICTED: transmembrane ascorbate ferrireductase 1 [Sesamum indicum]            |
| c18924.graph_c0 | 2.62904921    | 2.30272158    | 1.37248813    | 1.43308336     | 1.24002575     | 2.29004429     | 0.0014186 | -1.42518 | down      | -                                                                                |
| c18926.graph_c0 | 0.05423749    | 0             | 0             | 1.28113354     | 0.90759872     | 1.15797545     | 2.653E-12 | 4.889    | up        | PREDICTED: BTB/POZ domain-containing protein At5g66560 [Sesamum indicum]         |
| c18936.graph_c0 | 2.13649196    | 1.9247682     | 1.83031783    | 0              | 0              | 0              | 1.501E-32 | -Inf     | down      | -                                                                                |
| c18949.graph_c0 | 135.04453     | 137.152955    | 138.637056    | 17.8970631     | 17.9457298     | 19.4099552     | 0         | -3.98491 | down      | hypothetical protein MIMGU_mgv1a005690mg [Erythranthe outtata]                   |
| c18956.graph_c0 | 0.05843633    | 0.05849484    | 0.075093      | 1.44402038     | 2.64597752     | 1.69815097     | 3.117E-06 | 3.81829  | up        | unnamed protein product [Coffea canephora]                                       |
| c18990.graph_c0 | 2.005296      | 3.19343818    | 1.75696688    | 85.7900754     | 100.48916      | 96.2217156     | 7.72E-107 | 4.25633  | up        | -                                                                                |
| c19012.graph_c0 | 11.1347011    | 6.74617284    | 5.91706198    | 0              | 0              | 0              | 3.943E-25 | -Inf     | down      | uncharacterized protein LOC100191867 precursor [Zea mays]                        |
| c19020.graph_c0 | 51.9644699    | 49.6064734    | 45.3770139    | 50.3080295     | 54.2447963     | 42.7167766     | 9.255E-16 | -1.08674 | down      | -                                                                                |
| c19035.graph_c0 | 8.95781246    | 8.45439479    | 8.16743051    | 4.99137296     | 4.28280432     | 5.41369434     | 1.172E-30 | -1.88896 | down      | PREDICTED: putative pectinesterase 11 [Sesamum indicum]                          |
| c19039.graph_c0 | 0.1035807     | 0.10368442    | 0             | 2.74778776     | 2.85484323     | 3.50147466     | 2.034E-13 | 4.38772  | up        | PREDICTED: probable WRKY transcription factor 65 [Sesamum indicum]               |

| #ID             | 0 h-1<br>FPKM | 0 h-2<br>FPKM | 0 h-3<br>FPKM | 28 h-1<br>FPKM | 28 h-2<br>FPKM | 28 h-3<br>FPKM | FDR       | log2FC   | regulated | nr_annotation                                                                      |
|-----------------|---------------|---------------|---------------|----------------|----------------|----------------|-----------|----------|-----------|------------------------------------------------------------------------------------|
| c19040.graph_c0 | 3.43721516    | 3.56808875    | 4.49875308    | 16.0066531     | 17.9612081     | 17.1004858     | 6.982E-15 | 1.05606  | up        | PREDICTED: UDP-sulfoquinovose synthase, chloroplastic isoform X2 [Sesamum indicum] |
| c19065.graph_c0 | 1.63163204    | 0.94226877    | 1.33060554    | 16.1231454     | 14.5988701     | 13.9193119     | 3.847E-41 | 2.42578  | up        | PREDICTED: protein SCARECROW [Sesamum indicum]                                     |
| c19067.graph_c0 | 0.55034134    | 0.55089242    | 0             | 2.59990194     | 3.19014839     | 3.04625461     | 0.0001285 | 1.93406  | up        | -                                                                                  |
| c19070.graph_c0 | 37.3547876    | 42.2776049    | 44.1428931    | 41.7470793     | 40.1573388     | 40.1881194     | 4.231E-14 | -1.1122  | down      | -                                                                                  |
| c19074.graph_c0 | 3.32657844    | 2.61635747    | 3.47326282    | 17.2479705     | 18.2630567     | 19.6404711     | 2.021E-26 | 1.45878  | up        | PREDICTED: probable galacturonosyltransferase 9 [Sesamum indicum]                  |
| c19080.graph_c0 | 5.28747724    | 5.85915702    | 4.73868164    | 4.96316529     | 4.95500748     | 5.58886524     | 6.391E-18 | -1.12303 | down      | PREDICTED: protein INVOLVED IN DE NOVO 2-like isoform X2 [Sesamum indicum]         |
| c19095.graph_c0 | 0             | 0.12329361    | 0.07913934    | 3.13318064     | 4.0817972      | 3.72540402     | 2.165E-14 | 4.65517  | up        | PREDICTED: probable glutathione S-transferase [Sesamum indicum]                    |
| c19100.graph_c0 | 0.95226465    | 0.32996015    | 0.32945709    | 15.4391641     | 15.0697479     | 15.8563953     | 1.932E-59 | 3.76822  | up        | PREDICTED: protein notum homolog [Sesamum indicum]                                 |
| c19110.graph_c0 | 0.0576275     | 0.11537041    | 0.14810723    | 2.42923335     | 2.45808702     | 2.73411666     | 3.442E-10 | 3.46924  | up        | -                                                                                  |
| c19118.graph_c0 | 172.324738    | 179.907123    | 170.886095    | 51.1950384     | 48.8635237     | 41.4290591     | 0         | -2.9776  | down      | hypothetical protein M569_08491 [Genlisea aurea]                                   |
| c19122.graph_c0 | 320.795999    | 336.387866    | 305.974354    | 94.1178354     | 99.0290833     | 105.586303     | 0         | -2.77831 | down      | -                                                                                  |
| c19130.graph_c0 | 13.0659878    | 12.9776832    | 13.1459029    | 11.6311083     | 9.83712937     | 11.1728192     | 2.362E-12 | -1.35409 | down      | hypothetical protein MIMGU_mgv1a000569mg [Erythranthe diffusa]                     |
| c19155.graph_c0 | 0.44680628    | 0.48452483    | 0.33492886    | 6.27823377     | 6.49940783     | 4.88008722     | 3.853E-17 | 2.71366  | up        | PREDICTED: transcription factor bHLH143-like [Sesamum indicum]                     |
| c19173.graph_c0 | 0.495028      | 1.02644193    | 0.63613057    | 9.71415434     | 10.0239664     | 8.76547174     | 1.421E-26 | 2.63206  | up        | PREDICTED: protein ECERIFERUM 26-like [Sesamum indicum]                            |
| c19181.graph_c0 | 0.34341309    | 0.44197325    | 0.31521387    | 1.67582299     | 2.57550814     | 2.50215696     | 0.0004294 | 1.52906  | up        | PREDICTED: myb-related protein 308-like [Sesamum indicum]                          |
| c19184.graph_c0 | 0.51117079    | 0.63960331    | 0.78003871    | 0.41795548     | 0.35640936     | 0.60630802     | 0.0001357 | -1.57698 | down      | PREDICTED: F-box protein At5g51370-like [Sesamum indicum]                          |
| c19192.graph_c0 | 2.62112622    | 2.68338158    | 1.68412548    | 11.9496673     | 13.9558921     | 11.7999186     | 1.505E-08 | 1.34603  | up        | PREDICTED: probable carbohydrate esterase At4g34215 [Sesamum indicum]              |
| c19206.graph_c0 | 0.27214243    | 0.61293361    | 0.21857112    | 16.639214      | 20.0687392     | 16.1598033     | 7.558E-56 | 4.4954   | up        | PREDICTED: lysine histidine transporter-like 8 [Sesamum indicum]                   |
| c19214.graph_c0 | 0             | 0             | 0             | 14.342881      | 12.150877      | 15.0991841     | 1.223E-28 | Inf      | up        | hypothetical protein MIMGU_mgv1a015553mg [Erythranthe diffusa]                     |
| c19228.graph_c0 | 9.13013374    | 9.48199904    | 10.4126677    | 1.57598554     | 1.5727532      | 1.42135884     | 1.29E-70  | -3.75969 | down      | PREDICTED: zinc finger CCCH domain-containing protein 48-like [Sesamum indicum]    |
| c19232.graph_c0 | 3.24809785    | 3.40804192    | 2.96701357    | 3.21396343     | 2.85054644     | 3.08673922     | 6.748E-07 | -1.16158 | down      | -                                                                                  |
| c19237.graph_c0 | 1.87028547    | 1.94149747    | 2.3143764     | 2.01379659     | 1.77281277     | 1.43783638     | 0.0002963 | -1.32419 | down      | hypothetical protein MIMGU_mgv1a015502mg [Erythranthe diffusa]                     |
| c19281.graph_c0 | 561.128627    | 554.807207    | 558.743233    | 363.863427     | 377.712377     | 385.797435     | 6.614E-82 | -1.66129 | down      | PREDICTED: putative DNA-binding protein ESCAROLA [Sesamum indicum]                 |
| c19282.graph_c0 | 0             | 0             | 0             | 12.3319158     | 11.5799463     | 12.3229894     | 8.932E-54 | Inf      | up        | PREDICTED: cytosolic sulfotransferase 12-like [Sesamum indicum]                    |
| c19300.graph_c0 | 1.07845777    | 0.53976884    | 1.24727484    | 3.99746616     | 5.37862005     | 4.02940556     | 0.0060032 | 1.1304   | up        | BnaC04g47180D [Brassica napus]                                                     |
| c19303.graph_c0 | 0.15964309    | 0.15980295    | 0.30772154    | 3.48083032     | 3.79762663     | 2.88766793     | 4.262E-12 | 2.91762  | up        | PREDICTED: aspartic proteinase PCS1 [Sesamum indicum]                              |



| #ID             | 0 h-1<br>FPKM | 0 h-2<br>FPKM | 0 h-3<br>FPKM | 28 h-1<br>FPKM | 28 h-2<br>FPKM | 28 h-3<br>FPKM | FDR       | log2FC   | regulated | nr_annotation                                                                                          |
|-----------------|---------------|---------------|---------------|----------------|----------------|----------------|-----------|----------|-----------|--------------------------------------------------------------------------------------------------------|
| c19305.graph_c0 | 21.3995982    | 22.6834076    | 17.2693773    | 18.0736814     | 17.068834      | 18.9199476     | 6.206E-14 | -1.26974 | down      | PREDICTED: uncharacterized protein LOC105174914 [Sesamum indicum]                                      |
| c19327.graph_c0 | 0             | 0             | 0.14040454    | 2.46171515     | 3.65669667     | 3.88788283     | 1.091E-11 | 5.02587  | up        | predicted protein [Hordeum vulgare subsp. vulgare]                                                     |
| c19336.graph_c0 | 101.882514    | 120.656094    | 89.2795173    | 31.1892368     | 36.5666341     | 34.3419662     | 3.212E-27 | -2.69922 | down      | PREDICTED: probable WRKY transcription factor 1 [Sesamum indicum]                                      |
| c19337.graph_c0 | 0             | 0.151852      | 0.09747031    | 2.20509508     | 1.84166955     | 1.48445515     | 1.104E-08 | 3.36946  | up        | unnamed protein product [Coffea canephora]                                                             |
| c19349.graph_c0 | 1.00335107    | 1.86523214    | 1.84192263    | 31.7735829     | 34.3635723     | 31.1973875     | 9.727E-84 | 3.27258  | up        | PREDICTED: LRR receptor-like serine/threonine-protein kinase HSL2 [Sesamum indicum]                    |
| c19358.graph_c0 | 0.16094826    | 0.53703142    | 0.13788326    | 1.32573104     | 1.65469144     | 1.74994746     | 0.0095291 | 1.41577  | up        | hypothetical protein MIMGU_mgv1a000552mg [Erythranthe diffusa]                                         |
| c19362.graph_c0 | 0             | 0.03629732    | 0             | 3.58418386     | 3.73588654     | 3.35476252     | 7.596E-24 | 7.11802  | up        | PREDICTED: lactosylceramide 4-alpha-galactosyltransferase-like [Sesamum indicum]                       |
| c19374.graph_c0 | 1.26716495    | 1.5993296     | 1.20356831    | 7.86827163     | 8.27932492     | 7.92345042     | 2.834E-13 | 1.47484  | up        | PREDICTED: pentatricopeptide repeat-containing protein At1g77360, mitochondrial-like [Sesamum indicum] |
| c19380.graph_c0 | 0             | 0             | 0             | 4.16164644     | 5.60340361     | 4.08100108     | 3.98E-24  | Inf      | up        | PREDICTED: uncharacterized protein LOC105170375 [Sesamum indicum]                                      |
| c19383.graph_c0 | 5.93652485    | 2.97123469    | 4.0773923     | 1.33902374     | 0.67167383     | 1.33543964     | 1.416E-06 | -3.04115 | down      | -                                                                                                      |
| c19389.graph_c0 | 0.0529669     | 0             | 0             | 3.15667515     | 2.78066507     | 2.35593398     | 3.508E-15 | 6.23088  | up        | PREDICTED: probable receptor-like serine/threonine-protein kinase At4g34500 [Sesamum indicum]          |
| c19395.graph_c0 | 1.06117983    | 0.69045759    | 0.81819486    | 9.87212012     | 8.91359887     | 10.0694617     | 9.767E-17 | 2.40149  | up        | PREDICTED: uncharacterized protein LOC105159543 [Sesamum indicum]                                      |
| c19414.graph_c0 | 2.22766283    | 1.95960338    | 1.99516981    | 1.66811471     | 1.59474831     | 1.24106492     | 1.508E-05 | -1.54762 | down      | -                                                                                                      |
| c19429.graph_c0 | 1.14471221    | 1.32815413    | 1.2369777     | 6.22086837     | 6.5046322      | 6.78880921     | 5.118E-10 | 1.30427  | up        | PREDICTED: uncharacterized protein LOC105163794 isoform X2 [Sesamum indicum]                           |
| c19430.graph_c0 | 8.9739926     | 6.41641335    | 7.00153244    | 0              | 0              | 0              | 1.281E-60 | -Inf     | down      | 40S ribosomal protein S6-B [Mucor circinelloides f. circinelloides 1006PhL]                            |
| c19433.graph_c0 | 0.23146885    | 0.1853605     | 0.41642529    | 175.363187     | 160.888371     | 135.489922     | 4.83E-126 | 8.04418  | up        | PREDICTED: GDSL esterase/lipase At1g11250 [Sesamum indicum]                                            |
| c19445.graph_c0 | 0             | 0             | 0             | 2.64546592     | 3.61703451     | 2.46706125     | 5.574E-14 | Inf      | up        | PREDICTED: T-complex protein 1 subunit epsilon [Nicotiana tomentosiformis]                             |
| c19453.graph_c0 | 41.5376555    | 46.7950207    | 35.8365055    | 10.6142693     | 10.0171232     | 11.6207484     | 4.446E-44 | -3.03254 | down      | PREDICTED: protein ECERIFERUM 1-like [Sesamum indicum]                                                 |
| c19467.graph_c0 | 0.84134946    | 0.90381575    | 0.76472814    | 4.34007295     | 5.03637776     | 4.38119268     | 1.696E-09 | 1.36497  | up        | hypothetical protein MIMGU_mgv1a023991mg [Erythranthe diffusa]                                         |
| c19468.graph_c0 | 0.65296846    | 0.20111456    | 0.12909082    | 5.54886192     | 5.40563643     | 4.79592097     | 3.881E-13 | 2.92809  | up        | PREDICTED: probable sugar phosphate/phosphate translocator At1g12500 [Sesamum indicum]                 |
| c19492.graph_c0 | 135.002675    | 136.635693    | 133.050524    | 20.9953265     | 20.4024387     | 19.3998501     | 0         | -3.82533 | down      | l-asparaginase, putative [Ricinus communis]                                                            |
| c19498.graph_c0 | 0             | 0             | 0             | 0.92276334     | 1.13072906     | 2.07066022     | 1.782E-05 | Inf      | up        | predicted protein [Physcomitrella patens]                                                              |
| c19507.graph_c0 | 347.873114    | 190.615216    | 181.239426    | 0              | 0              | 0              | 9.609E-31 | -Inf     | down      | -                                                                                                      |

| #ID             | 0 h-1<br>FPKM | 0 h-2<br>FPKM | 0 h-3<br>FPKM | 28 h-1<br>FPKM | 28 h-2<br>FPKM | 28 h-3<br>FPKM | FDR       | log2FC   | regulated | nr_annotation                                                                                                     |
|-----------------|---------------|---------------|---------------|----------------|----------------|----------------|-----------|----------|-----------|-------------------------------------------------------------------------------------------------------------------|
| c19511.graph_c0 | 4.36867519    | 4.5533817     | 4.2249093     | 29.099884      | 29.1708648     | 29.354386      | 2.168E-32 | 1.64666  | up        | PREDICTED: histone-lysine N-methyltransferase family member SUVH9 [Sesamum indicum]                               |
| c19514.graph_c0 | 3.74253578    | 2.59822878    | 2.28829913    | 22.1991458     | 23.6088407     | 20.5486574     | 3.675E-35 | 1.85745  | up        | PREDICTED: omega-6 fatty acid desaturase, chloroplastic [Sesamum indicum]                                         |
| c19516.graph_c0 | 5.54320052    | 5.25975374    | 4.37781975    | 22.4519782     | 24.6674623     | 23.6284772     | 4.916E-12 | 1.13274  | up        | PREDICTED: myosin heavy chain 1B isoform X1 [Sesamum indicum]                                                     |
| c19520.graph_c0 | 16.5809509    | 17.5435288    | 20.0927796    | 12.987541      | 14.0380117     | 12.9414556     | 1.13E-15  | -1.53321 | down      | PREDICTED: calcium-binding protein PBP1-like [Sesamum indicum]                                                    |
| c19522.graph_c0 | 0.54875865    | 0.5053635     | 0.42310596    | 8.18408654     | 8.62824216     | 7.87578832     | 6.866E-42 | 2.9751   | up        | PREDICTED: putative leucine-rich repeat receptor-like serine/threonine-protein kinase At2g14440 [Sesamum indicum] |
| c19529.graph_c0 | 1.00161765    | 0.91543621    | 1.06327166    | 0.2848578      | 0.60013307     | 0.36157588     | 8.602E-09 | -2.35077 | down      | -                                                                                                                 |
| c19541.graph_c0 | 0.73820271    | 0.7389419     | 0.63241314    | 7.04631534     | 6.9434764      | 8.17221328     | 1.018E-13 | 2.30532  | up        | PREDICTED: origin recognition complex subunit 1-like isoform X1 [Sesamum indicum]                                 |
| c19554.graph_c0 | 2.92788845    | 1.85756215    | 1.5367764     | 18.2825802     | 21.2702627     | 20.2988557     | 4.837E-31 | 2.15969  | up        | PREDICTED: uncharacterized protein LOC105168795 [Sesamum indicum]                                                 |
| c19560.graph_c0 | 26.3138584    | 25.35245      | 26.1457384    | 14.7875382     | 15.2327244     | 15.9679225     | 4.255E-68 | -1.84903 | down      | PREDICTED: glutathione S-transferase omega-like 2 [Sesamum indicum]                                               |
| c19565.graph_c0 | 27.6032281    | 28.6247847    | 23.9877457    | 3.17525954     | 2.21537946     | 1.76658126     | 7.024E-73 | -4.57655 | down      | -                                                                                                                 |
| c19570.graph_c0 | 0.85576057    | 0.32946826    | 0.84591247    | 7.79844476     | 6.30689944     | 7.65177656     | 3.427E-11 | 2.32906  | up        | PREDICTED: probable glucan 1,3-alpha-glucosidase [Sesamum indicum]                                                |
| c19577.graph_c0 | 2406.73122    | 2236.25457    | 2518.98785    | 239.328416     | 250.905393     | 287.38666      | 6.72E-160 | -4.29387 | down      | PREDICTED: reticulon-like protein B13 [Sesamum indicum]                                                           |
| c19580.graph_c0 | 1.13834323    | 1.82317297    | 1.1702529     | 17.3741673     | 19.6215053     | 16.7875798     | 2.713E-23 | 2.61236  | up        | expansin 5 [Cucumis sativus]                                                                                      |
| c19592.graph_c0 | 0             | 0.12837874    | 0             | 4.66057949     | 6.39626079     | 5.32419273     | 9.775E-14 | 5.91334  | up        | PREDICTED: protein WALLS ARE THIN 1-like [Nicotiana glauca]                                                       |
| c19593.graph_c0 | 1.57099471    | 1.50704416    | 0.7570464     | 12.4169651     | 10.2233815     | 10.947372      | 1.224E-12 | 2.04847  | up        | PREDICTED: transcription factor bHLH95-like isoform X1 [Sesamum indicum]                                          |
| c19602.graph_c0 | 0             | 0             | 0             | 7.24874476     | 5.98394229     | 5.06992846     | 1.136E-10 | Inf      | up        | -                                                                                                                 |
| c19602.graph_c1 | 0.11008628    | 0.66117911    | 0.4243957     | 75.6895326     | 70.9412489     | 71.7510386     | 1.51E-134 | 6.41584  | up        | PREDICTED: NAC domain-containing protein 100-like isoform X2 [Nicotiana tomentosiformis]                          |
| c19608.graph_c0 | 129.339462    | 132.063344    | 124.510637    | 20.1409501     | 22.9606897     | 24.0315354     | 0         | -3.61275 | down      | hypothetical protein MIMGU_mgv1a012664mg [Erythranthe outafata]                                                   |
| c19622.graph_c0 | 5.11909416    | 5.32438501    | 4.00861419    | 22.4975686     | 24.4073274     | 21.986706      | 8.993E-17 | 1.16533  | up        | PREDICTED: cyclin-D3-3-like [Sesamum indicum]                                                                     |
| c19632.graph_c0 | 0             | 0             | 0             | 3.57255279     | 2.86050887     | 6.1603675      | 7.294E-07 | Inf      | up        | NADH dehydrogenase subunit 1 (mitochondrion) [Cyanoptiche gloeocystis]                                            |
| c19652.graph_c0 | 0             | 0.1268796     | 0.16288221    | 3.17824745     | 2.91124873     | 3.04445422     | 1.416E-11 | 3.86925  | up        | PREDICTED: probable nucleoredoxin 2 [Sesamum indicum]                                                             |
| c19656.graph_c0 | 0.03091457    | 0             | 0.03972644    | 3.66237006     | 4.46313431     | 3.11680301     | 8.226E-26 | 6.2134   | up        | hypothetical protein M569_04675 [Genlisea aurea]                                                                  |
| c19657.graph_c0 | 15.6245196    | 15.3621178    | 16.5979178    | 5.75361081     | 4.83041173     | 6.79524918     | 9.477E-54 | -2.54316 | down      | PREDICTED: auxin-induced protein 15A [Sesamum indicum]                                                            |
| c19668.graph_c0 | 2.41526061    | 1.53316237    | 1.89250336    | 15.5845045     | 14.7285247     | 15.5466721     | 6.129E-17 | 1.88484  | up        | PREDICTED: uncharacterized protein LOC105169149 [Sesamum indicum]                                                 |
| c19685.graph_c0 | 0.73197928    | 0.87925469    | 0.56437341    | 3.29838958     | 4.00287169     | 3.6754332      | 0.000732  | 1.24796  | up        | hypothetical protein MIMGU_mgv1a026794mg [Erythranthe outafata]                                                   |

| #ID             | 0 h-1<br>FPKM | 0 h-2<br>FPKM | 0 h-3<br>FPKM | 28 h-1<br>FPKM | 28 h-2<br>FPKM | 28 h-3<br>FPKM | FDR       | log2FC   | regulated | nr_annotation                                                                                                   |
|-----------------|---------------|---------------|---------------|----------------|----------------|----------------|-----------|----------|-----------|-----------------------------------------------------------------------------------------------------------------|
| c19686.graph_c0 | 5.6757177     | 4.99963295    | 6.12655845    | 2.31004419     | 2.60719165     | 2.28890088     | 1.545E-12 | -2.31376 | down      | -                                                                                                               |
| c19697.graph_c0 | 0             | 0             | 0             | 7.178556       | 6.85193804     | 8.36806153     | 2.443E-13 | Inf      | up        | PREDICTED: non-specific lipid-transfer protein 2-like [Sesamum indicum]                                         |
| c19719.graph_c0 | 36.3377323    | 36.5027631    | 33.0294781    | 4.43670233     | 5.94563787     | 5.06843802     | 0         | -3.8662  | down      | SP1a/K Yanodine receptor domain-containing protein [1 neobroma cacao]                                           |
| c19727.graph_c0 | 17.4585684    | 9.5244475     | 11.8905243    | 0              | 0              | 0              | 2.554E-32 | -Inf     | down      | --                                                                                                              |
| c19728.graph_c0 | 0.14285693    | 0.07149999    | 0.27536522    | 2.90717267     | 2.01555155     | 1.90625557     | 2.828E-07 | 2.69816  | up        | PREDICTED: uncharacterized protein LOC105160245 [Sesamum indicum]                                               |
| c19729.graph_c0 | 15.076573     | 11.8159586    | 15.3940644    | 7.72975614     | 10.3921726     | 8.31747413     | 1.037E-12 | -1.76972 | down      | hypothetical protein MIMGU_mgv1a012056mg [Erythranthe guttata]                                                  |
| c19742.graph_c0 | 2.04525583    | 1.78594591    | 1.73351652    | 0.28464514     | 0.31412073     | 0.49034378     | 5.392E-20 | -3.43942 | down      | -                                                                                                               |
| c19746.graph_c0 | 2976.86331    | 2819.2395     | 3061.80676    | 213.463914     | 193.085385     | 247.669028     | 0         | -4.84915 | down      | PREDICTED: 17.5 kDa class 1 heat shock protein-like [Sesamum indicum]                                           |
| c19755.graph_c0 | 0.06001965    | 0.06007975    | 0             | 33.748839      | 31.2728966     | 31.6203536     | 0         | 8.58189  | up        | PREDICTED: probable beta-D-xylosidase 2 [Sesamum indicum]                                                       |
| c19769.graph_c0 | 3.95417972    | 2.63875949    | 2.29155651    | 31.4999243     | 32.9697279     | 27.910795      | 1.251E-31 | 2.29318  | up        | -                                                                                                               |
| c19778.graph_c0 | 0.7245456     | 0.72527112    | 1.70696126    | 6.7579764      | 8.87537319     | 6.94677916     | 8.011E-06 | 1.73472  | up        | PREDICTED: uncharacterized protein LOC102622885 [Citrus sinensis]                                               |
| c19787.graph_c0 | 493.291072    | 478.612443    | 506.13531     | 68.2793471     | 69.9715933     | 72.1362992     | 0         | -3.90337 | down      | hypothetical protein MIMGU_mgv1a013874mg [Erythranthe guttata]                                                  |
| c19789.graph_c0 | 16.0787182    | 19.2998474    | 18.4256651    | 78.7155458     | 76.5082705     | 78.4314659     | 1.462E-23 | 1.0269   | up        | PREDICTED: plasminogen activator inhibitor 1 RNA-binding protein-like [Sesamum indicum]                         |
| c19792.graph_c0 | 12.6417582    | 11.3223731    | 12.458694     | 1.03623575     | 1.09156102     | 0.76100392     | 1.53E-137 | -4.74853 | down      | hypothetical protein MIMGU_mgv1a004859mg [Erythranthe guttata]                                                  |
| c19801.graph_c0 | 11.7672543    | 5.68643188    | 7.99521649    | 124.353464     | 130.386255     | 129.225647     | 1.984E-93 | 2.82862  | up        | unnamed protein product [Coffea canephora]                                                                      |
| c19806.graph_c0 | 3.35690653    | 3.2861444     | 2.66437981    | 24.4157427     | 24.5557764     | 22.6750913     | 1.511E-52 | 1.85645  | up        | PREDICTED: probable dolichyl-diphosphooligosaccharide--protein glycosyltransferase subunit 3B [Sesamum indicum] |
| c19810.graph_c0 | 11.2872278    | 10.9715105    | 11.0620691    | 5.60354308     | 6.29218485     | 6.28711242     | 5.008E-86 | -1.96404 | down      | PREDICTED: probable receptor protein kinase TMK1 [Sesamum indicum]                                              |
| c19815.graph_c0 | 0.18894528    | 0.41609586    | 0.63128564    | 4.17465999     | 3.91811576     | 2.93585518     | 3.071E-08 | 2.05249  | up        | PREDICTED: radical S-adenosyl methionine domain-containing protein 1, mitochondrial [Sesamum indicum]           |
| c19818.graph_c0 | 4.86687728    | 5.16075288    | 5.03510465    | 29.0021929     | 27.7696163     | 27.689308      | 9.391E-44 | 1.3964   | up        | PREDICTED: nuclear pore complex protein NUP93A-like [Sesamum indicum]                                           |
| c19819.graph_c0 | 15.0248126    | 8.39114011    | 10.1835179    | 0              | 0              | 0              | 1.779E-32 | -Inf     | down      | unnamed protein product [Chondrus crispus]                                                                      |
| c19832.graph_c0 | 0             | 0             | 0             | 5.88857755     | 6.43927603     | 11.8524103     | 8.111E-09 | Inf      | up        | ATPase subunit 6 [Cycas taitungensis]                                                                           |
| c19836.graph_c0 | 5.16103918    | 3.92922799    | 3.45618546    | 26.9439        | 20.1300747     | 21.8135631     | 6.683E-08 | 1.37092  | up        | PREDICTED: gibberellin 2-beta-dioxygenase [Sesamum indicum]                                                     |
| c19846.graph_c0 | 4.48013357    | 4.09465282    | 4.6307503     | 3.8932052      | 3.45128656     | 3.63890709     | 1.515E-05 | -1.35702 | down      | hypothetical protein MIMGU_mgv1a0026501mg, partial [Erythranthe guttata]                                        |
| c19852.graph_c0 | 2.85872384    | 2.95101099    | 1.83678666    | 11.2325873     | 13.1904275     | 11.7087838     | 5.85E-05  | 1.15498  | up        | PREDICTED: ubiquitin domain-containing protein 1-like [Sesamum indicum]                                         |

| #ID             | 0 h-1<br>FPKM | 0 h-2<br>FPKM | 0 h-3<br>FPKM | 28 h-1<br>FPKM | 28 h-2<br>FPKM | 28 h-3<br>FPKM | FDR       | log2FC   | regulated | nr_annotation                                                                             |
|-----------------|---------------|---------------|---------------|----------------|----------------|----------------|-----------|----------|-----------|-------------------------------------------------------------------------------------------|
| c19859.graph_c0 | 15.988221     | 19.2431822    | 17.1212475    | 4.35755508     | 7.55666833     | 5.07961337     | 5.371E-45 | -2.71538 | down      | PREDICTED: uncharacterized protein DDB_G0287625-like [Sesamum indicum]                    |
| c19875.graph_c0 | 0.15775389    | 0.42109829    | 0.06757333    | 17.0835383     | 15.321311      | 16.4348873     | 7.876E-57 | 5.15829  | up        | PREDICTED: vestitone reductase-like [Sesamum indicum]                                     |
| c19884.graph_c0 | 65.2938074    | 65.2196819    | 53.1011106    | 25.930676      | 26.4310473     | 26.4490248     | 4.642E-50 | -2.30807 | down      | PREDICTED: uncharacterized protein LOC105166661 [Sesamum indicum]                         |
| c19885.graph_c0 | 16.9539225    | 15.4690498    | 16.0024453    | 10.1411259     | 9.15648583     | 8.80895175     | 2.524E-17 | -1.87522 | down      | atypical dual-specificity phosphatase 1 [Arabidopsis thaliana]                            |
| c19888.graph_c0 | 6.66948108    | 5.00711967    | 5.53514509    | 0              | 0              | 0              | 1.119E-41 | -Inf     | down      | 60S ribosomal protein L26B [Populus trichocarpa]                                          |
| c19916.graph_c0 | 1344.43037    | 1348.4148     | 1364.68462    | 47.7791925     | 38.4736873     | 50.5774917     | 0         | -5.97991 | down      | hypothetical protein MIMGU_mgv1a010/20mg [Erythranthe diffusa]                            |
| c19917.graph_c0 | 0.95666917    | 0             | 0.52686761    | 10.9261686     | 12.9145821     | 13.454548      | 3.804E-15 | 3.56772  | up        | -                                                                                         |
| c19925.graph_c0 | 5.91768344    | 8.57181082    | 7.24660069    | 36.4314767     | 33.853622      | 32.4528346     | 6.405E-15 | 1.14857  | up        | PREDICTED: uncharacterized protein At1g2/050 [Sesamum indicum]                            |
| c19932.graph_c0 | 0.12207268    | 0.16292656    | 0             | 8.75387666     | 6.96934356     | 7.02243153     | 1.257E-35 | 5.24622  | up        | PREDICTED: uncharacterized protein LOC105155205 [Sesamum indicum]                         |
| c19933.graph_c0 | 3.79883537    | 2.53509288    | 3.3629171     | 1.59522806     | 2.38210304     | 1.45188843     | 2.569E-08 | -1.92849 | down      | -                                                                                         |
| c19944.graph_c0 | 174.505401    | 168.680333    | 188.870882    | 8.05908869     | 8.40040093     | 9.29293863     | 5.13E-203 | -5.45997 | down      | PREDICTED: F-box/kelch-repeat protein At1g23390-like [Sesamum indicum]                    |
| c19947.graph_c0 | 0             | 0             | 0             | 5.28585035     | 5.10340342     | 5.5089523      | 1.322E-20 | Inf      | up        | PREDICTED: uncharacterized protein At1g08160-like [Sesamum indicum]                       |
| c19952.graph_c0 | 26.371973     | 26.2305942    | 23.5500035    | 24.3648279     | 23.9424139     | 25.4317529     | 3.376E-38 | -1.13528 | down      | PREDICTED: DEAD-box ATP-dependent RNA helicase 7 [Sesamum indicum]                        |
| c19957.graph_c0 | 0.12222524    | 0.04893905    | 0.09423857    | 3.8731015      | 3.384757       | 3.49385792     | 1.799E-25 | 4.25142  | up        | PREDICTED: probable beta-D-xylosidase 7 [Sesamum indicum]                                 |
| c19964.graph_c0 | 8.62530099    | 9.09812814    | 8.34268525    | 2.69626626     | 1.70413294     | 1.98011812     | 2.919E-32 | -3.12046 | down      | PREDICTED: probable E3 ubiquitin-protein ligase XERICO [Sesamum indicum]                  |
| c19983.graph_c0 | 1.65724115    | 1.45153805    | 0.8518482     | 8.43131321     | 9.21678686     | 8.62442442     | 3.152E-11 | 1.64674  | up        | PREDICTED: glucuronokinase 1-like [Sesamum indicum]                                       |
| c19987.graph_c0 | 39.3644392    | 33.1474258    | 39.2107517    | 33.0113625     | 30.5194752     | 34.5576413     | 9.652E-17 | -1.27827 | down      | PREDICTED: uncharacterized protein LOC105163283 [Sesamum indicum]                         |
| c19990.graph_c0 | 26.4654423    | 24.9156474    | 31.5939046    | 4.91026067     | 3.56680478     | 4.82012946     | 4.397E-35 | -3.73385 | down      | PREDICTED: benzoate carboxyl methyltransferase-like [Sesamum indicum]                     |
| c20007.graph_c0 | 45.7618919    | 52.6208884    | 53.2230097    | 50.310225      | 47.8962546     | 50.1564768     | 2.604E-15 | -1.12317 | down      | unnamed protein product [Coffea canephora]                                                |
| c20019.graph_c0 | 0.58928846    | 0.19662618    | 0.50483933    | 2.99804019     | 2.38469334     | 1.86390576     | 0.0025347 | 1.39707  | up        | PREDICTED: uncharacterized protein LOC105167731 [Sesamum indicum]                         |
| c20028.graph_c0 | 5.3707566     | 6.68656741    | 6.08206572    | 1.87852807     | 1.98249512     | 2.18980509     | 6.984E-37 | -2.67483 | down      | PREDICTED: probable L-type lectin-domain containing receptor kinase S.7 [Sesamum indicum] |
| c20029.graph_c0 | 8.20482025    | 6.85923897    | 6.4883193     | 0.19658954     | 0.23666923     | 0.16041546     | 3.109E-59 | -6.27148 | down      | hypothetical protein MIMGU_mgv1a021012mg [Erythranthe diffusa]                            |
| c20032.graph_c0 | 32.646766     | 36.0153002    | 28.9914869    | 22.3557029     | 23.5525131     | 23.1917413     | 6.949E-30 | -1.58772 | down      | PREDICTED: DNA topoisomerase 6 subunit A [Sesamum indicum]                                |

| #ID             | 0 h-1<br>FPKM | 0 h-2<br>FPKM | 0 h-3<br>FPKM | 28 h-1<br>FPKM | 28 h-2<br>FPKM | 28 h-3<br>FPKM | FDR       | log2FC   | regulated | nr_annotation                                                                                 |
|-----------------|---------------|---------------|---------------|----------------|----------------|----------------|-----------|----------|-----------|-----------------------------------------------------------------------------------------------|
| c20045.graph_c0 | 15.3763512    | 15.2984649    | 12.4542963    | 3.92833769     | 4.28076626     | 5.52670944     | 1.11E-42  | -2.73714 | down      | PREDICTED: uncharacterized protein LOC105176125 [Sesamum indicum]                             |
| c20049.graph_c0 | 21.4425848    | 18.1618938    | 22.1042158    | 103.867104     | 115.971463     | 111.65542      | 4E-32     | 1.33396  | up        | V-type proton ATPase 16 kDa proteolipid subunit [Morus notabilis]                             |
| c20061.graph_c0 | 2.35129873    | 2.22756464    | 2.05031169    | 9.12436072     | 9.6712148      | 9.99775799     | 9.679E-12 | 1.03019  | up        | PREDICTED: polygalacturonate 4-alpha-galacturonosyltransferase-like [Sesamum indicum]         |
| c20070.graph_c0 | 0.92940246    | 1.05168092    | 1.03853823    | 0.32305773     | 0.31820819     | 0.28757724     | 1.09E-11  | -2.793   | down      | -                                                                                             |
| c20073.graph_c0 | 27.71263      | 30.3129516    | 26.4203944    | 22.774387      | 27.8374472     | 24.4783503     | 1.748E-34 | -1.25941 | down      | PREDICTED: ocs element-binding factor 1 [Sesamum indicum]                                     |
| c20074.graph_c0 | 9.16627718    | 7.23697924    | 9.12459999    | 2.34577374     | 2.11801375     | 2.06726279     | 2.958E-23 | -3.05811 | down      | -                                                                                             |
| c20085.graph_c0 | 26.8514898    | 27.2175369    | 26.994626     | 16.59126       | 19.5105886     | 18.9134778     | 2.673E-61 | -1.64972 | down      | PREDICTED: UDP-glycosyltransferase 86A1-like [Sesamum indicum]                                |
| c20086.graph_c0 | 14.8492964    | 12.2915216    | 12.2931689    | 8.6650383      | 6.69935062     | 8.89117427     | 2.539E-26 | -1.7887  | down      | -                                                                                             |
| c20092.graph_c0 | 0.20772227    | 0.13862018    | 0.3855675     | 2.39876703     | 1.74177691     | 1.82049499     | 4.153E-07 | 1.92441  | up        | PREDICTED: pentatricopeptide repeat-containing protein At4g20770 [Sesamum indicum]            |
| c20097.graph_c0 | 2.14236831    | 1.60838517    | 2.06477107    | 0.51902031     | 0.62483557     | 0.31763725     | 5.585E-15 | -3.086   | down      | hypothetical protein MIMGU_mgv1a025285mg [Erythranthe outtata]                                |
| c20112.graph_c0 | 0.60693055    | 0.36002269    | 0.54883948    | 11.4362791     | 12.1402938     | 12.0115018     | 3.474E-69 | 3.46283  | up        | PREDICTED: pentatricopeptide repeat-containing protein At2g15820 isoform X1 [Sesamum indicum] |
| c20115.graph_c0 | 4.93631992    | 4.41559663    | 3.91399211    | 0              | 0              | 0              | 1.78E-42  | -Inf     | down      | -                                                                                             |
| c20120.graph_c0 | 0.56860528    | 0.15177991    | 0.09742404    | 3.49892656     | 3.38308313     | 3.32719791     | 3.994E-10 | 2.57004  | up        | PREDICTED: probable protein phosphatase 2C 38 [Sesamum indicum]                               |
| c20121.graph_c0 | 27.8863766    | 24.0969603    | 29.0968744    | 178.944363     | 188.472245     | 179.093626     | 8.473E-63 | 1.66109  | up        | hypothetical protein CICLE_v10026787mg [Citrus clementina]                                    |
| c20128.graph_c0 | 1.80586613    | 1.20511629    | 2.02592891    | 7.0207964      | 7.63704178     | 8.14287567     | 4.824E-08 | 1.08555  | up        | PREDICTED: uncharacterized protein LOC105158144 [Sesamum indicum]                             |
| c20131.graph_c0 | 0.83122105    | 1.01035055    | 0.68666912    | 14.4343122     | 12.9549063     | 12.8170232     | 3.196E-48 | 2.90338  | up        | PREDICTED: protein ASPARTIC PROTEASE IN GUARD CELL 2 [Sesamum indicum]                        |
| c20135.graph_c0 | 0.09579202    | 0.03196265    | 0             | 4.01481604     | 5.23844286     | 3.69266552     | 2.376E-23 | 5.59706  | up        | PREDICTED: membrane protein of ER body-like protein [Sesamum indicum]                         |
| c20139.graph_c0 | 0.63491358    | 0.34221888    | 0.56484629    | 5.57291467     | 7.05095717     | 6.57497961     | 4.613E-14 | 2.54775  | up        | PREDICTED: protein IQ-DOMAIN 14-like [Sesamum indicum]                                        |
| c20147.graph_c0 | 36.6726467    | 45.3606213    | 29.1159419    | 37.1790417     | 34.4888926     | 37.1257028     | 4.992E-05 | -1.11779 | down      | PREDICTED: uncharacterized protein LOC105166783 [Sesamum indicum]                             |
| c20172.graph_c0 | 30.4805458    | 30.6905444    | 29.3995715    | 19.8856516     | 20.0962865     | 21.0328146     | 5.227E-72 | -1.6597  | down      | PREDICTED: ethylene-responsive transcription factor ERF008-like [Nelumbo nucifera]            |
| c20173.graph_c0 | 7.63749349    | 7.40472804    | 7.90096625    | 6.0047323      | 6.46192212     | 5.58350729     | 4.191E-16 | -1.43774 | down      | PREDICTED: uncharacterized protein At3g17611 [Sesamum indicum]                                |
| c20177.graph_c0 | 1.42254605    | 2.10205171    | 2.1762238     | 0.93543177     | 1.11132524     | 1.48643544     | 4.36E-06  | -1.78324 | down      | PREDICTED: LOW QUALITY PROTEIN: dof zinc finger protein DOF5.1-like [Sesamum indicum]         |
| c20191.graph_c0 | 6.54293365    | 6.09637635    | 7.13880746    | 6.72929217     | 7.2370957      | 7.00413609     | 4.196E-09 | -1.00755 | down      | hypothetical protein MIMGU_mgv1a014744mg [Erythranthe outtata]                                |
| c20195.graph_c0 | 7.69703814    | 6.34159827    | 4.71724556    | 30.0793839     | 30.616859      | 28.5123887     | 1.333E-14 | 1.16473  | up        | monodehydroascorbate reductase [Acanthus ebracteatus]                                         |

| #ID             | 0 h-1<br>FPKM | 0 h-2<br>FPKM | 0 h-3<br>FPKM | 28 h-1<br>FPKM | 28 h-2<br>FPKM | 28 h-3<br>FPKM | FDR       | log2FC   | regulated | nr_annotation                                                                                         |
|-----------------|---------------|---------------|---------------|----------------|----------------|----------------|-----------|----------|-----------|-------------------------------------------------------------------------------------------------------|
| c20199.graph_c0 | 81.4503773    | 87.8036251    | 75.2413583    | 35.019864      | 27.2633857     | 29.5048617     | 4.42E-103 | -2.50275 | down      | PREDICTED: NAC domain-containing protein 18 [Sesamum indicum]                                         |
| c20225.graph_c0 | 0.64099947    | 2.08533434    | 2.26520167    | 7.27929252     | 7.88702238     | 6.55758695     | 0.0057578 | 1.01995  | up        | -                                                                                                     |
| c20239.graph_c0 | 1.84894046    | 1.2125878     | 1.26991056    | 41.8431291     | 42.8010765     | 40.3069021     | 1.56E-167 | 3.76365  | up        | PREDICTED: trihelix transcription factor GTL1 isoform X1 [Sesamum indicum]                            |
| c20244.graph_c0 | 1.10666135    | 0.94951672    | 1.21894599    | 0.25278474     | 0.22824092     | 0.15001475     | 7.374E-18 | -3.47006 | down      | PREDICTED: G2/mitotic-specific cyclin S15-/-like [Sesamum indicum]                                    |
| c20255.graph_c0 | 10.6277847    | 6.17538818    | 7.43658472    | 0              | 0              | 0              | 1.541E-41 | -Inf     | down      | --                                                                                                    |
| c20259.graph_c0 | 4.28935444    | 1.66619238    | 2.7971294     | 0              | 0              | 0              | 5.656E-12 | -Inf     | down      | uncharacterized protein LOC100273024 [Zea mays]                                                       |
| c20263.graph_c0 | 6.41187082    | 4.81371851    | 5.29682648    | 0              | 0              | 0              | 2.938E-30 | -Inf     | down      | putative 40s ribosomal protein s21 protein [Neofusicoccum parvum UCRNP2]                              |
| c20279.graph_c0 | 0.60035519    | 0.41604671    | 0.29672315    | 5.23601633     | 5.93984511     | 6.29926737     | 7.153E-14 | 2.65222  | up        | PREDICTED: haloacid dehalogenase-like hydrolase domain-containing protein At2g33255 [Sesamum indicum] |
| c20280.graph_c0 | 5.58849168    | 7.14800096    | 6.71596981    | 45.6187235     | 48.727809      | 41.7663252     | 9.246E-42 | 1.71398  | up        | PREDICTED: 50S ribosomal protein L3, chloroplastic-like [Sesamum indicum]                             |
| c20281.graph_c0 | 0.08475428    | 0.04241957    | 0.10891261    | 1.41677523     | 2.00224988     | 1.80951186     | 9.845E-10 | 3.37275  | up        | PREDICTED: BTB/POZ domain-containing protein At5g60050 [Sesamum indicum]                              |
| c20284.graph_c0 | 3.6578188     | 3.20379636    | 2.93777624    | 1.82770612     | 1.50022478     | 2.03371809     | 1.535E-07 | -1.95686 | down      | PREDICTED: uncharacterized protein At4g08330, chloroplastic-like [Sesamum indicum]                    |
| c20285.graph_c0 | 7.66766925    | 8.67029968    | 6.75130679    | 6.50162079     | 8.4794002      | 8.50527328     | 0.0001303 | -1.06358 | down      | PREDICTED: dentin sialophosphoprotein [Sesamum indicum]                                               |
| c20293.graph_c0 | 24.3837383    | 23.9031587    | 22.906285     | 153.478289     | 165.282071     | 162.361844     | 6.141E-90 | 1.66684  | up        | PREDICTED: 40S ribosomal protein S16-like [Sesamum indicum]                                           |
| c20297.graph_c0 | 35.682738     | 39.3392451    | 36.4945448    | 25.2590136     | 22.197064      | 25.5682605     | 1.101E-71 | -1.70088 | down      | PREDICTED: uncharacterized protein At4g18255 [Sesamum indicum]                                        |
| c20315.graph_c0 | 6.05323205    | 5.95571578    | 5.85060316    | 28.352038      | 27.602355      | 28.9034478     | 1.498E-16 | 1.15839  | up        | BnaA09g38920D [Brassica napus]                                                                        |
| c20317.graph_c0 | 0.64283071    | 0.34066292    | 0.43732743    | 2.3085456      | 2.60550028     | 2.55652377     | 0.0006575 | 1.30796  | up        | hypothetical protein PRUPE_ppa024913mg [Prunus persica]                                               |
| c20335.graph_c0 | 0.89392663    | 0.85008067    | 0.516929      | 6.33458202     | 9.20991571     | 7.50162932     | 7.476E-11 | 2.26502  | up        | PREDICTED: perakine reductase-like [Sesamum indicum]                                                  |
| c20336.graph_c0 | 5.72828534    | 3.71649532    | 2.86263967    | 0              | 0              | 0              | 4.665E-17 | -Inf     | down      | probable 40S ribosomal protein S21 [Piriformospora indica DSM 118271]                                 |
| c20338.graph_c0 | 3.08081037    | 2.63695398    | 2.98356654    | 14.4406706     | 15.6755861     | 13.5311299     | 1.352E-11 | 1.23545  | up        | PREDICTED: BAG family molecular chaperone regulator 8, chloroplastic [Sesamum indicum]                |
| c20366.graph_c0 | 2.27842677    | 2.91423834    | 3.09052797    | 0.55198248     | 0.99677685     | 0.75068866     | 8.398E-12 | -2.94338 | down      | -                                                                                                     |
| c20368.graph_c0 | 0.25634208    | 0.1140439     | 0             | 9.00488398     | 10.4669355     | 8.12493235     | 6.524E-49 | 5.1524   | up        | PREDICTED: protein NRT1/ PTR FAMILY 2.13-like [Sesamum indicum]                                       |
| c20375.graph_c0 | 1.35356305    | 1.16522986    | 1.11320455    | 5.03686054     | 6.0400639      | 4.54351754     | 1.401E-05 | 1.01516  | up        | PREDICTED: exopolygalacturonase [Sesamum indicum]                                                     |
| c20377.graph_c0 | 1.32632866    | 1.96859453    | 2.23333186    | 9.77264135     | 9.93425444     | 8.43550004     | 2.769E-08 | 1.25101  | up        | PREDICTED: diphthamide biosynthesis protein 7 homolog isoform X1 [Sesamum indicum]                    |
| c20380.graph_c0 | 0             | 0             | 0             | 1.71826917     | 2.03410492     | 1.99408869     | 1.89E-14  | Inf      | up        | chlorophyllase [Picrohiza kurrooa]                                                                    |
| c20382.graph_c0 | 1.76004365    | 1.66570756    | 1.80938062    | 25.3046958     | 29.8406966     | 27.4047112     | 3.926E-74 | 2.88771  | up        | PREDICTED: tasciclin-like arabinogalactan protein 1 [Sesamum indicum]                                 |

| #ID             | 0 h-1<br>FPKM | 0 h-2<br>FPKM | 0 h-3<br>FPKM | 28 h-1<br>FPKM | 28 h-2<br>FPKM | 28 h-3<br>FPKM | FDR       | log2FC   | regulated | nr_annotation                                                                                      |
|-----------------|---------------|---------------|---------------|----------------|----------------|----------------|-----------|----------|-----------|----------------------------------------------------------------------------------------------------|
| c20385.graph_c0 | 40.9855089    | 41.8933078    | 38.5207617    | 20.3781303     | 19.130111      | 18.0466916     | 5.01E-124 | -2.16679 | down      | hypothetical protein MIMGU_mgv1a005020mg [Erythranthe<br>cuttata]                                  |
| c20387.graph_c0 | 94.224968     | 102.419745    | 95.4753915    | 32.7523391     | 29.5391014     | 27.8054652     | 4.35E-205 | -2.78792 | down      | PREDICTED: uncharacterized protein LOC105158345 [Sesamum<br>indicum]                               |
| c20394.graph_c0 | 2.08641542    | 1.79014684    | 0.76603612    | 16.8969696     | 10.9532979     | 12.0201239     | 2.631E-05 | 2.02238  | up        | -                                                                                                  |
| c20398.graph_c0 | 15.505617     | 8.50788608    | 9.88886834    | 0              | 0              | 0              | 5.916E-24 | -Inf     | down      | --                                                                                                 |
| c20399.graph_c0 | 0.83630069    | 1.17199337    | 1.1463248     | 8.75258674     | 8.01252582     | 6.97671432     | 7.279E-10 | 1.81757  | up        | myb family transcription factor family protein [Populus trichocarpa]                               |
| c20408.graph_c0 | 0.21806392    | 0.13096937    | 0.11208831    | 2.18712888     | 2.11787176     | 2.48303208     | 1.489E-08 | 2.79753  | up        | PREDICTED: aspartic proteinase nepenthesin-1 [Sesamum<br>indicum]                                  |
| c20413.graph_c0 | 2.67950017    | 2.42673726    | 2.24085422    | 2.13291626     | 1.36761372     | 1.58909945     | 1.014E-08 | -1.61811 | down      | PREDICTED: probable methyltransferase PM126 [Sesamum<br>indicum]                                   |
| c20415.graph_c0 | 27.789405     | 27.1489501    | 26.9169126    | 224.898322     | 220.641099     | 205.588489     | 7.26E-100 | 1.90124  | up        | PREDICTED: probable E3 ubiquitin-protein ligase RHA2B<br>[Sesamum indicum]                         |
| c20444.graph_c0 | 0.41049386    | 0.24654294    | 0.66816775    | 7.65751061     | 8.24294151     | 6.86519785     | 4.443E-33 | 3.00239  | up        | PREDICTED: transcription factor DIVARICATA-like [Sesamum<br>indicum]                               |
| c20447.graph_c0 | 1.1749342     | 0.48428088    | 0.97695333    | 17.0787081     | 17.8242516     | 18.9776705     | 3.02E-33  | 3.26377  | up        | PREDICTED: uncharacterized protein At5g01610-like [Sesamum<br>indicum]                             |
| c20460.graph_c0 | 4.7822646     | 5.08013821    | 4.13873834    | 2.30532605     | 2.75397572     | 2.69145896     | 1.316E-16 | -1.9415  | down      | PREDICTED: lysM domain receptor-like kinase 5 [Sesamum<br>indicum]                                 |
| c20472.graph_c0 | 118.075129    | 112.735985    | 114.014348    | 68.6639145     | 66.211898      | 76.0491109     | 1.82E-100 | -1.79873 | down      | PREDICTED: uncharacterized protein LOC105175062 [Sesamum<br>indicum]                               |
| c20473.graph_c0 | 0.43637762    | 0.39313313    | 0.47664814    | 4.02789056     | 4.3097601      | 4.06311773     | 2.08E-15  | 2.15476  | up        | PREDICTED: uncharacterized protein LOC105174198 [Sesamum<br>indicum]                               |
| c20480.graph_c0 | 1.1853104     | 1.08479754    | 0.82686415    | 22.7922139     | 21.8459884     | 22.173304      | 2.022E-81 | 3.34499  | up        | PREDICTED: protein notum homolog [Sesamum indicum]                                                 |
| c20483.graph_c0 | 2.52553295    | 2.85426342    | 3.35010046    | 0.35526635     | 0.3207722      | 0.57978887     | 1.638E-20 | -3.88849 | down      | -                                                                                                  |
| c20506.graph_c0 | 18.1048829    | 18.0305478    | 19.7044467    | 13.6620395     | 13.3660282     | 11.9424499     | 5.001E-43 | -1.61119 | down      | PREDICTED: probable 2-oxoglutarate-dependent dioxygenase<br>At3g49630 isoform X1 [Sesamum indicum] |
| c20508.graph_c0 | 11.7511843    | 12.3604346    | 10.4986077    | 3.00957755     | 3.40282814     | 3.82749362     | 1.46E-86  | -2.84517 | down      | PREDICTED: cellulose synthase-like protein D3 isoform X1<br>[Sesamum indicum]                      |
| c20512.graph_c0 | 10.7333417    | 15.471489     | 7.17223993    | 8.42500539     | 9.57917253     | 10.1847935     | 0.009312  | -1.32823 | down      | -                                                                                                  |
| c20514.graph_c0 | 0             | 0.06217232    | 0             | 3.65644354     | 3.62749243     | 4.45702465     | 3.264E-17 | 6.4804   | up        | PREDICTED: uncharacterized protein LOC105156631 [Sesamum<br>indicum]                               |
| c20522.graph_c0 | 44.3085878    | 46.2779976    | 42.5554404    | 26.5844341     | 30.8685348     | 29.7219386     | 9.248E-85 | -1.70084 | down      | PREDICTED: zinc finger protein GIS2-like isoform X2 [Sesamum<br>indicum]                           |
| c20541.graph_c0 | 1.47445508    | 0.32798478    | 0.63157772    | 8.45393411     | 8.27816141     | 7.67561908     | 1.6E-06   | 2.24476  | up        | Os06g0708300 [Oryza sativa Japonica Group]                                                         |
| c20547.graph_c0 | 1.02782737    | 1.1079994     | 1.01599913    | 6.95302311     | 8.6386364      | 6.44728418     | 4.167E-11 | 1.71453  | up        | hypothetical protein MIMGU_mgv1a006570mg [Erythranthe<br>cuttata]                                  |
| c20552.graph_c0 | 165.075907    | 173.46402     | 178.445608    | 20.3262129     | 18.9652367     | 19.4204844     | 1.11E-232 | -4.22984 | down      | hypothetical protein MIMGU_mgv1a010527mg [Erythranthe<br>cuttata]                                  |
| c20557.graph_c0 | 0.28981944    | 0.72527412    | 0.74485891    | 2.42234963     | 3.13809138     | 3.52353557     | 0.0021519 | 1.27003  | up        | PREDICTED: UDP-galactose transporter 2-like [Sesamum indicum]                                      |

| #ID             | 0 h-1<br>FPKM | 0 h-2<br>FPKM | 0 h-3<br>FPKM | 28 h-1<br>FPKM | 28 h-2<br>FPKM | 28 h-3<br>FPKM | FDR       | log2FC   | regulated | nr_annotation                                                                          |
|-----------------|---------------|---------------|---------------|----------------|----------------|----------------|-----------|----------|-----------|----------------------------------------------------------------------------------------|
| c20560.graph_c1 | 0.71046499    | 0.38791441    | 0.82997786    | 3.28593912     | 4.32318977     | 4.51990486     | 5.492E-05 | 1.55912  | up        | poly(A)-binding protein [Nicotiana tabacum]                                            |
| c20573.graph_c0 | 2.41971637    | 3.41583755    | 3.26888936    | 0.36074583     | 0.32571966     | 0.36795706     | 1.79E-24  | -4.20301 | down      | -                                                                                      |
| c20574.graph_c0 | 35.9055724    | 37.7164166    | 28.2536799    | 33.0548866     | 34.4997267     | 32.8612543     | 7.807E-11 | -1.10836 | down      | PREDICTED: LOW QUALITY PROTEIN: serrate RNA effector molecule [Pyrus x bretschneideri] |
| c20588.graph_c0 | 54.9067961    | 56.770743     | 52.3745457    | 4.3874181      | 5.45011638     | 4.1045702      | 0         | -4.64751 | down      | PREDICTED: protein BPS1, chloroplastic-like [Sesamum indicum]                          |
| c20601.graph_c0 | 2182.4846     | 2192.99073    | 2245.65722    | 180.48652      | 161.371419     | 229.601929     | 0         | -4.6237  | down      | PREDICTED: chaperone protein dnaJ 20, chloroplastic-like [Nelumbo nucifera]            |
| c20602.graph_c0 | 0             | 0.04873447    | 0             | 5.23690559     | 5.33546352     | 5.13947602     | 9.075E-26 | 7.25088  | up        | PREDICTED: anthocyanidin 3-O-glucosyltransferase 2-like [Sesamum indicum]              |
| c20607.graph_c0 | 0             | 0             | 0             | 2.3705486      | 2.44615215     | 2.43175215     | 5.101E-13 | Inf      | up        | unnamed protein product [Coffea canephora]                                             |
| c20619.graph_c0 | 2.43403027    | 2.50919795    | 2.56761775    | 0.71289638     | 0.90591802     | 0.73253331     | 5.134E-21 | -2.76736 | down      | PREDICTED: G2/mitotic-specific cyclin-1-like [Sesamum indicum]                         |
| c20625.graph_c0 | 3.98220196    | 2.75711443    | 2.04691487    | 1.76066354     | 2.59145175     | 1.81061932     | 0.0007457 | -1.59581 | down      | PREDICTED: probable anion transporter 3, chloroplastic [Sesamum indicum]               |
| c20635.graph_c0 | 1.31827676    | 0.92371777    | 1.41169819    | 18.3319518     | 20.0123892     | 19.4671883     | 7.252E-48 | 2.89139  | up        | PREDICTED: uncharacterized protein LOC105169209 [Sesamum indicum]                      |
| c20639.graph_c0 | 11.4129153    | 12.8556998    | 11.1951967    | 70.4772804     | 74.373329      | 73.9983254     | 1.236E-70 | 1.53563  | up        | PREDICTED: 1-complex protein 1 subunit alpha [Sesamum indicum]                         |
| c20647.graph_c0 | 13.8998822    | 15.255741     | 15.4138214    | 3.28198311     | 4.44498455     | 4.14264173     | 2.127E-63 | -3.00035 | down      | PREDICTED: uncharacterized protein LOC105174183 [Sesamum indicum]                      |
| c20653.graph_c0 | 0             | 0             | 0             | 2.6670525      | 3.89000502     | 5.85925055     | 2.655E-07 | Inf      | up        | predicted protein [Hordeum vulgare subsp. vulgare]                                     |
| c20673.graph_c0 | 20.6115627    | 11.1616831    | 11.7236099    | 0              | 0              | 0              | 8.956E-20 | -Inf     | down      | -                                                                                      |
| c20674.graph_c0 | 0.04193356    | 0.1679022     | 0.10777257    | 2.49911966     | 2.00880931     | 1.54188044     | 8.502E-09 | 3.15474  | up        | PREDICTED: probable transcription factor GLK1 [Sesamum indicum]                        |
| c20676.graph_c0 | 3.89879309    | 2.6017981     | 3.24183167    | 0              | 0              | 0              | 1.578E-39 | -Inf     | down      | -                                                                                      |
| c20678.graph_c0 | 8.43904527    | 6.99935358    | 7.74607663    | 1.48955201     | 1.50315237     | 1.42995562     | 3.165E-27 | -3.4803  | down      | PREDICTED: homeobox-leucine zipper protein HAT22-like [Sesamum indicum]                |
| c20681.graph_c0 | 0.63210801    | 0.2711747     | 0.46416218    | 3.15025686     | 3.61474128     | 3.26678367     | 0.0001164 | 1.78678  | up        | PREDICTED: ras-related protein RABC2a-like [Sesamum indicum]                           |
| c20682.graph_c0 | 15.0215957    | 11.5907415    | 10.2549022    | 7.16468104     | 5.64757043     | 6.49591247     | 8.983E-13 | -2.01902 | down      | PREDICTED: protein MKS1 [Sesamum indicum]                                              |
| c20683.graph_c0 | 1.18632972    | 0.86780136    | 0.70360646    | 4.34425023     | 4.0721625      | 4.41079582     | 0.0007469 | 1.13341  | up        | PREDICTED: GDSL esterase/lipase At4g10955-like [Sesamum indicum]                       |
| c20685.graph_c0 | 164.27113     | 165.182303    | 166.309129    | 25.3601118     | 23.3601104     | 26.6412236     | 0         | -3.80794 | down      | PREDICTED: F-box/keich-repeat protein At5g43190 [Sesamum indicum]                      |
| c20709.graph_c0 | 23.8910808    | 23.6049948    | 22.6277628    | 24.2129937     | 22.3265957     | 23.9032912     | 7.72E-27  | -1.08311 | down      | PREDICTED: ABSCISIC ACID-INSENSITIVE 5-like protein 2 [Sesamum indicum]                |
| c20713.graph_c0 | 234.818836    | 248.452814    | 226.559352    | 16.3067513     | 19.3663792     | 21.2823211     | 0         | -4.72876 | down      | PREDICTED: uncharacterized protein At1g16070 [Sesamum indicum]                         |
| c20718.graph_c0 | 0.09706982    | 0.09716702    | 0             | 1.83429443     | 2.29319431     | 2.70569831     | 1.685E-09 | 4.06751  | up        | -                                                                                      |
| c20743.graph_c0 | 13.3143983    | 12.5536453    | 13.7826761    | 57.3523111     | 55.093331      | 57.6263999     | 1.151E-28 | 1.00969  | up        | PREDICTED: COP9 signalosome complex subunit 1-like [Sesamum indicum]                   |



| #ID             | 0 h-1<br>FPKM | 0 h-2<br>FPKM | 0 h-3<br>FPKM | 28 h-1<br>FPKM | 28 h-2<br>FPKM | 28 h-3<br>FPKM | FDR       | log2FC   | regulated | nr_annotation                                                                                                                        |
|-----------------|---------------|---------------|---------------|----------------|----------------|----------------|-----------|----------|-----------|--------------------------------------------------------------------------------------------------------------------------------------|
| c20752.graph_c0 | 0             | 0.19241464    | 0.37051962    | 2.16544231     | 2.90125172     | 1.88098216     | 2.048E-06 | 2.51007  | up        | -                                                                                                                                    |
| c20754.graph_c0 | 0.06319426    | 0.06325754    | 0             | 1.83716883     | 1.24409341     | 2.09876067     | 1.293E-08 | 4.28783  | up        | PREDICTED: ATP-dependent 6-phosphofructokinase 6-like [Sesamum indicum]                                                              |
| c20761.graph_c0 | 0.33520481    | 0.16777024    | 0.28716764    | 3.32954066     | 3.50119659     | 3.97591901     | 9.905E-15 | 2.68438  | up        | PREDICTED: inorganic phosphate transporter 2-1, chloroplastic-like [Sesamum indicum]                                                 |
| c20762.graph_c0 | 21.3045264    | 10.9775737    | 12.7460876    | 0              | 0              | 0              | 1.041E-23 | -Inf     | down      | cytochrome c oxidase subunit I [Lingulodinium polyedrum]                                                                             |
| c20763.graph_c0 | 0.68363213    | 1.12710982    | 0.98184662    | 13.7659416     | 14.5141083     | 14.4286668     | 2.94E-38  | 2.84148  | up        | PREDICTED: uncharacterized protein LOC105157658 [Sesamum indicum]                                                                    |
| c20765.graph_c0 | 1.05501725    | 0.56865506    | 1.0428761     | 0.91423824     | 0.63907464     | 0.67381633     | 0.0049132 | -1.3521  | down      | PREDICTED: uncharacterized protein LOC105172642 [Sesamum indicum]                                                                    |
| c20780.graph_c0 | 18.9011012    | 16.6289306    | 16.6035784    | 76.8425262     | 89.5371441     | 81.7501854     | 2.915E-26 | 1.16142  | up        | PREDICTED: NADH dehydrogenase [ubiquinone] 1 beta subcomplex subunit 3-B [Sesamum indicum]                                           |
| c20793.graph_c0 | 27.3477849    | 27.0229156    | 24.5484096    | 188.824019     | 200.576923     | 201.602406     | 8.33E-105 | 1.81567  | up        | PREDICTED: aquaporin AQPcic-like [Sesamum indicum]                                                                                   |
| c20797.graph_c0 | 106.189933    | 109.450259    | 111.044639    | 545.60722      | 593.947745     | 559.31674      | 3.335E-60 | 1.28738  | up        | PREDICTED: 40S ribosomal protein S3-3-like [Sesamum indicum]                                                                         |
| c20802.graph_c0 | 0.31497287    | 0.39411034    | 0.2023763     | 1.23044751     | 1.31767245     | 1.82127301     | 0.0089709 | 1.17813  | up        | PREDICTED: pentatricopeptide repeat-containing protein At1g09220, mitochondrial [Sesamum indicum]                                    |
| c20804.graph_c0 | 20.7643723    | 21.2505042    | 15.9301735    | 18.6953488     | 16.7784595     | 16.4193073     | 1.159E-11 | -1.24653 | down      | PREDICTED: LOW QUALITY PROTEIN; probable LRR receptor-like serine/threonine-protein kinase At1g56140 [Sesamum indicum]               |
| c20809.graph_c0 | 2.52116588    | 2.00154759    | 1.89919191    | 0.44229592     | 0.62755275     | 0.51558552     | 1.186E-13 | -3.10599 | down      | -                                                                                                                                    |
| c20810.graph_c0 | 27.3130531    | 30.9896517    | 30.8597821    | 171.719298     | 182.00772      | 172.449367     | 1.516E-68 | 1.46908  | up        | PREDICTED: adenylylate kinase [Sesamum indicum]                                                                                      |
| c20811.graph_c0 | 14.046012     | 12.8267369    | 11.3997989    | 14.6859994     | 14.3920386     | 11.2529449     | 0.0002706 | -1.01363 | down      | -                                                                                                                                    |
| c20815.graph_c0 | 39.8855724    | 40.3745011    | 40.1700804    | 315.163302     | 304.736811     | 293.061624     | 3.19E-117 | 1.83151  | up        | PREDICTED: tubulin alpha-3 chain [Sesamum indicum]                                                                                   |
| c20826.graph_c0 | 3.86244748    | 2.28653046    | 2.56175377    | 0              | 0              | 0              | 8.637E-27 | -Inf     | down      | Fructose-bisphosphate aldolase A [Rozella allomyces CSF55]                                                                           |
| c20831.graph_c0 | 6.59956081    | 4.39115957    | 5.9863743     | 27.0862462     | 25.2460767     | 24.6577174     | 1.119E-14 | 1.09061  | up        | PREDICTED: isocitrate dehydrogenase [NADP] isoform X1 [Sesamum indicum]                                                              |
| c20841.graph_c0 | 0.13293002    | 0.13306313    | 0.17082034    | 2.99499601     | 3.66375563     | 4.80894933     | 1.616E-09 | 3.62209  | up        | Chain C, Localization Of The Small Subunit Ribosomal Proteins Into A 5.5 A Cryo-em Map Of Triticum Aestivum Translating 80s Ribosome |
| c20850.graph_c0 | 1.45604889    | 1.80604116    | 1.66770215    | 7.95986493     | 10.6974307     | 8.95434433     | 7.034E-10 | 1.39357  | up        | PREDICTED: uncharacterized protein LOC105161748 [Sesamum indicum]                                                                    |
| c20853.graph_c0 | 0.02622689    | 0.05250631    | 0.10110779    | 1.35337045     | 1.32523141     | 1.11989331     | 3.841E-10 | 3.29392  | up        | PREDICTED: B3 domain-containing protein Os01g0234100-like [Sesamum indicum]                                                          |
| c20865.graph_c0 | 0.97699654    | 1.32725158    | 1.07612505    | 0.8749144      | 0.68692667     | 1.03467102     | 5.195E-08 | -1.46981 | down      | PREDICTED: 125 kDa kinesin-related protein [Sesamum indicum]                                                                         |
| c20868.graph_c0 | 2.49157738    | 2.36280535    | 4.04434809    | 0.09530864     | 0.25816429     | 0.46662641     | 9.759E-09 | -4.53285 | down      | -                                                                                                                                    |
| c20871.graph_c0 | 196.431259    | 208.112584    | 192.338467    | 136.735304     | 131.271493     | 134.694673     | 4.852E-87 | -1.65778 | down      | PREDICTED: branchpoint-bridging protein [Sesamum indicum]                                                                            |

| #ID             | 0 h-1<br>FPKM | 0 h-2<br>FPKM | 0 h-3<br>FPKM | 28 h-1<br>FPKM | 28 h-2<br>FPKM | 28 h-3<br>FPKM | FDR       | log2FC   | regulated | nr_annotation                                                                                     |
|-----------------|---------------|---------------|---------------|----------------|----------------|----------------|-----------|----------|-----------|---------------------------------------------------------------------------------------------------|
| c20872.graph_c0 | 1.89138441    | 1.19575475    | 2.04674008    | 18.0874643     | 21.1653446     | 22.1978717     | 5.607E-20 | 2.48881  | up        | hypothetical protein MIMGU_mgv1a013355mg [Erythranthe guttata]                                    |
| c20880.graph_c0 | 0             | 0             | 0             | 14.5181669     | 14.4584748     | 27.9473095     | 2.172E-15 | Inf      | up        | cytochrome c oxidase subunit I [Lingulodinium polyedrum]                                          |
| c20899.graph_c0 | 0.44279184    | 0.18995796    | 0.08128644    | 3.63195232     | 4.35857979     | 5.17699739     | 6.048E-11 | 3.13274  | up        | PREDICTED: polyadenylate-binding protein 8-like [Sesamum indicum]                                 |
| c20900.graph_c0 | 0             | 0             | 0             | 1.26154096     | 1.03159535     | 1.35959431     | 1.697E-14 | Inf      | up        | PREDICTED: raucaffricine-O-beta-D-glucosidase-like [Sesamum indicum]                              |
| c20914.graph_c0 | 59.4792406    | 60.1244276    | 57.9388557    | 14.967214      | 15.7663228     | 15.5439765     | 0         | -3.02994 | down      | PREDICTED: uncharacterized protein LOC105168301 [Sesamum indicum]                                 |
| c20944.graph_c0 | 1673.56929    | 1658.2327     | 1660.80325    | 822.875729     | 952.815926     | 928.70749      | 1.907E-94 | -1.97487 | down      | PREDICTED: 18 kDa seed maturation protein-like [Nicotiana glauca]                                 |
| c20994.graph_c0 | 1.7279142     | 1.94585       | 2.15104947    | 1.80526724     | 1.16933854     | 1.15284782     | 4.366E-06 | -1.59084 | down      | hypothetical protein MIMGU_mgv1a011912mg [Erythranthe guttata]                                    |
| c20998.graph_c0 | 0.29132832    | 0.19441336    | 0.43676317    | 2.08206818     | 1.78432359     | 1.18062671     | 0.0040175 | 1.35202  | up        | hypothetical protein MIMGU_mgv1a024355mg [Erythranthe guttata]                                    |
| c21005.graph_c0 | 0.70997679    | 0.95435208    | 0.86021409    | 5.24852872     | 6.08340086     | 5.13690185     | 2.143E-14 | 1.61296  | up        | PREDICTED: probable LRR receptor-like serine/threonine-protein kinase At2g24230 [Sesamum indicum] |
| c21008.graph_c0 | 0.1666016     | 0.12507632    | 0.05352241    | 1.05949448     | 0.76529934     | 0.71633219     | 0.000417  | 1.80076  | up        | hypothetical protein MIMGU_mgv1a020944mg, partial [Erythranthe guttata]                           |
| c21009.graph_c0 | 480.2178      | 457.952132    | 475.338859    | 67.3038134     | 66.3002858     | 76.8398209     | 0         | -3.83762 | down      | PREDICTED: histone H1-like [Sesamum indicum]                                                      |
| c21011.graph_c0 | 0.56152507    | 0.71822272    | 0.52114251    | 2.76610046     | 2.8250742      | 2.99715322     | 0.0004876 | 1.16511  | up        | PREDICTED: la-related protein 1B-like [Sesamum indicum]                                           |
| c21017.graph_c0 | 1.98691854    | 1.98890814    | 2.13640875    | 0.64836287     | 0.50558213     | 0.76954009     | 2.257E-16 | -2.75786 | down      | PREDICTED: uncharacterized protein LOC105175392 [Sesamum indicum]                                 |
| c21036.graph_c0 | 1.39662388    | 0.73784515    | 1.29618449    | 5.7519964      | 6.7210174      | 5.86697761     | 3.984E-07 | 1.32693  | up        | PREDICTED: uncharacterized mitochondrial carrier YMR166C isoform X1 [Sesamum indicum]             |
| c21047.graph_c0 | 0.04437748    | 0             | 0.05702682    | 0.93534556     | 1.16486806     | 1.31592127     | 1.712E-10 | 3.9757   | up        | PREDICTED: PAN domain-containing protein At5g03700 [Sesamum indicum]                              |
| c21056.graph_c0 | 320.714039    | 178.609573    | 216.018971    | 0              | 0              | 0              | 1.166E-57 | -Inf     | down      | --                                                                                                |
| c21058.graph_c1 | 5.73341899    | 4.97393879    | 7.04021838    | 4.44481694     | 4.51490957     | 4.15586225     | 1.792E-06 | -1.53059 | down      | -                                                                                                 |
| c21062.graph_c0 | 28.2441686    | 28.6066406    | 25.2262251    | 7.37638356     | 5.56475795     | 5.90027134     | 2.24E-133 | -3.21228 | down      | -                                                                                                 |
| c21068.graph_c0 | 23.4138299    | 21.8259626    | 18.1466431    | 146.825119     | 140.363746     | 142.039783     | 4.83E-95  | 1.67206  | up        | PREDICTED: LOW QUALITY PROTEIN: protein SENSITIVE TO PROTON RHIZOTOXICITY 1 [Sesamum indicum]     |
| c21082.graph_c0 | 10.1731722    | 9.86710574    | 10.7993762    | 46.6131056     | 50.546182      | 49.4654244     | 3.284E-22 | 1.15783  | up        | BnaC01g37340D [Brassica napus]                                                                    |
| c21098.graph_c0 | 46.04187      | 48.0986108    | 38.6839276    | 39.4730282     | 40.0741009     | 39.8366459     | 2.195E-22 | -1.2421  | down      | PREDICTED: receptor-like protein kinase HAIKU2 [Sesamum indicum]                                  |
| c21098.graph_c1 | 67.1025111    | 66.9482656    | 50.6952969    | 49.9487665     | 51.5832516     | 55.407848      | 1.82E-12  | -1.32192 | down      | unnamed protein product [Coffea canephora]                                                        |
| c21099.graph_c0 | 12.0112033    | 7.30823829    | 6.80950228    | 0              | 0              | 0              | 1.121E-22 | -Inf     | down      | --                                                                                                |
| c21103.graph_c0 | 4.69730471    | 5.11689144    | 5.5627933     | 47.5278732     | 46.1770352     | 47.4674193     | 5.4E-68   | 2.10613  | up        | hypothetical protein MIMGU_mgv1a010545mg [Erythranthe guttata]                                    |
| c21104.graph_c0 | 3.28913351    | 4.11553386    | 2.4201076     | 172.040563     | 159.653334     | 149.64927      | 7.03E-233 | 4.52784  | up        | PREDICTED: DELLA protein GAI-like [Sesamum indicum]                                               |
| c21106.graph_c0 | 2.05893627    | 2.18223315    | 1.75090673    | 34.6818039     | 36.9176314     | 33.9385343     | 1.54E-120 | 3.04995  | up        | PREDICTED: GDP-mannose 4,6 dehydratase 1 [Sesamum indicum]                                        |

| #ID             | 0 h-1<br>FPKM | 0 h-2<br>FPKM | 0 h-3<br>FPKM | 28 h-1<br>FPKM | 28 h-2<br>FPKM | 28 h-3<br>FPKM | FDR       | log2FC   | regulated | nr_annotation                                                                             |
|-----------------|---------------|---------------|---------------|----------------|----------------|----------------|-----------|----------|-----------|-------------------------------------------------------------------------------------------|
| c21107.graph_c0 | 1.32177034    | 1.74648393    | 1.1549985     | 1.03750747     | 1.4918961      | 1.91268351     | 0.005117  | -1.01336 | down      | PREDICTED: probable CCR4-associated factor 1 homolog 9 [Sesamum indicum]                  |
| c21108.graph_c0 | 0.43017333    | 0.28706939    | 0.3685265     | 25.8455262     | 23.5242811     | 23.7259556     | 2.124E-32 | 4.98346  | up        | -                                                                                         |
| c21110.graph_c0 | 0             | 0             | 0             | 2.93276119     | 3.74175098     | 4.00585668     | 5.437E-15 | Inf      | up        | PREDICTED: uncharacterized protein At1g08160-like [Sesamum indicum]                       |
| c21116.graph_c0 | 6.39291694    | 5.11945478    | 7.11979786    | 0.46463352     | 0.13984017     | 0.37913716     | 1.685E-25 | -5.33426 | down      | -                                                                                         |
| c21117.graph_c0 | 1.00561267    | 1.16555958    | 0.47609287    | 8.34734459     | 10.7669565     | 8.3180264      | 2.446E-13 | 2.29046  | up        | PREDICTED: BURP domain-containing protein 17-like [Sesamum indicum]                       |
| c21119.graph_c0 | 1.40734402    | 0.37072454    | 0.95183831    | 20.0263169     | 18.8596021     | 16.6488089     | 1.013E-31 | 3.25859  | up        | Signal peptidase complex catalytic subunit SEC11C [Gossypium arboreum]                    |
| c21130.graph_c0 | 0.17812424    | 0.0891513     | 0.11444835    | 2.13608457     | 2.3377989      | 2.85222693     | 7.73E-09  | 3.17768  | up        | PREDICTED: uncharacterized protein LOC101301302 [Fragaria vesca subsp. vesca]             |
| c21136.graph_c0 | 15.9021166    | 18.8751465    | 20.4348495    | 17.9530582     | 16.2924215     | 18.0044074     | 4.978E-08 | -1.1726  | down      | Arabinoxylan arabinofuranohydrolase [Gossypium arboreum]                                  |
| c21137.graph_c0 | 353.410059    | 329.253381    | 340.108395    | 228.51831      | 215.28593      | 195.903522     | 9.13E-103 | -1.76777 | down      | hypothetical protein L484_018717 [Morus notabilis]                                        |
| c21144.graph_c0 | 30.1080582    | 33.1599796    | 26.6440692    | 27.4828624     | 21.6865764     | 22.0017743     | 9.709E-21 | -1.42622 | down      | hypothetical protein MIMGU_mgv1a000612mg [Erythranthe guttata]                            |
| c21148.graph_c0 | 158.91922     | 149.175399    | 177.046655    | 151.628858     | 169.748961     | 165.775842     | 7.521E-12 | -1.08621 | down      | PREDICTED: CBS domain-containing protein CBSX3, mitochondrial-like [Sesamum indicum]      |
| c21154.graph_c0 | 1.35307603    | 0.84651933    | 1.04325376    | 6.66258825     | 7.52516517     | 5.75759871     | 5.709E-10 | 1.53154  | up        | PREDICTED: uncharacterized protein At5g39865-like [Sesamum indicum]                       |
| c21157.graph_c0 | 0             | 0             | 0.13961939    | 6.87005105     | 6.41690893     | 7.21679795     | 3.536E-17 | 6.06854  | up        | PREDICTED: transcription factor PRE6-like [Solanum lycopersicum]                          |
| c21162.graph_c0 | 0             | 0.1213478     | 0.05192691    | 1.23349317     | 1.59104097     | 1.43788622     | 1.411E-09 | 3.52402  | up        | PREDICTED: vegetative incompatibility protein HET-E-1-like [Sesamum indicum]              |
| c21165.graph_c0 | 15.341046     | 14.6294772    | 13.1522885    | 8.16441269     | 8.53330025     | 8.45211128     | 2.702E-77 | -1.86654 | down      | PREDICTED: protein PHOTOPERIOD-INDEPENDENT EARLY FLOWERING 1 isoform X2 [Sesamum indicum] |
| c21182.graph_c0 | 4.92426671    | 4.39470631    | 4.42189043    | 5.08811545     | 5.13915286     | 4.01111962     | 1.255E-05 | -1.03924 | down      | -                                                                                         |
| c21184.graph_c0 | 62.6680933    | 76.622035     | 75.1528136    | 24.6945353     | 24.7542014     | 24.9513969     | 5.653E-32 | -2.61949 | down      | PREDICTED: uncharacterized protein LOC105158345 [Sesamum indicum]                         |
| c21193.graph_c0 | 1.41290041    | 1.64522383    | 1.18571949    | 1.04784477     | 1.2867036      | 1.12864327     | 2.901E-06 | -1.38153 | down      | hypothetical protein MIMGU_mgv1a002822mg [Erythranthe guttata]                            |
| c21202.graph_c0 | 5.17184689    | 6.2762572     | 4.09686659    | 0.79811592     | 1.32501803     | 1.05041302     | 5.518E-19 | -3.37992 | down      | hypothetical protein MIMGU_mgv1a02/064mg [Erythranthe guttata]                            |
| c21208.graph_c0 | 3.53909575    | 3.5848139     | 2.05737345    | 0.88801949     | 0.52531616     | 0.87453734     | 3.861E-10 | -3.08721 | down      | -                                                                                         |
| c21212.graph_c0 | 0.33760743    | 0.50691824    | 0.54229864    | 3.49653868     | 3.91399929     | 3.82088108     | 3.069E-10 | 1.92234  | up        | PREDICTED: protein LUTEIN DEFICIENT 5, chloroplastic [Sesamum indicum]                    |
| c21220.graph_c0 | 1.18139245    | 1.65560561    | 1.03233253    | 0.89297439     | 0.93031402     | 1.26114198     | 9.882E-05 | -1.41339 | down      | hypothetical protein MIMGU_mgv1a01/885mg [Erythranthe guttata]                            |
| c21224.graph_c0 | 9.21333427    | 6.31781671    | 9.78856241    | 60.687592      | 68.8391548     | 64.1917503     | 4.977E-39 | 1.843    | up        | PREDICTED: elongation factor 1-gamma 2-like [Sesamum indicum]                             |

| #ID             | 0 h-1<br>FPKM | 0 h-2<br>FPKM | 0 h-3<br>FPKM | 28 h-1<br>FPKM | 28 h-2<br>FPKM | 28 h-3<br>FPKM | FDR       | log2FC   | regulated | nr_annotation                                                                                                |
|-----------------|---------------|---------------|---------------|----------------|----------------|----------------|-----------|----------|-----------|--------------------------------------------------------------------------------------------------------------|
| c21231.graph_c0 | 0             | 0.07137492    | 0.18325568    | 1.24375164     | 1.59090408     | 1.39547537     | 6.852E-07 | 2.93719  | up        | PREDICTED: probable xyloglucan glycosyltransferase 5 [Sesamum indicum]                                       |
| c21237.graph_c0 | 3.12424179    | 2.38667729    | 2.64129894    | 15.1777093     | 15.8082134     | 14.1889846     | 7.215E-15 | 1.38083  | up        | unnamed protein product [Coffea canephora]                                                                   |
| c21242.graph_c0 | 0.02327536    | 0             | 0             | 9.2025205      | 10.7833884     | 10.0904627     | 9.298E-97 | 9.27663  | up        | PREDICTED: probable inactive receptor kinase At4g23740 [Sesamum indicum]                                     |
| c21243.graph_c0 | 8.39005168    | 8.15849724    | 6.1608849     | 2.26491245     | 1.41577171     | 1.99031545     | 1.234E-32 | -3.08752 | down      | PREDICTED: uncharacterized protein DDB_G0284459-like isoform X1 [Sesamum indicum]                            |
| c21247.graph_c0 | 0.43096847    | 0.21570001    | 0.46150962    | 5.89907838     | 5.89194102     | 5.49517144     | 4.282E-19 | 2.86965  | up        | PREDICTED: uncharacterized protein LOC105161548 [Sesamum indicum]                                            |
| c21248.graph_c0 | 0.19188993    | 0.12805472    | 0.08219539    | 2.23143194     | 2.51846729     | 2.57950951     | 1.35E-11  | 3.10726  | up        | PREDICTED: phosphatidylinositol/phosphatidylcholine transfer protein SFH13-like isoform X1 [Sesamum indicum] |
| c21250.graph_c0 | 0.06446166    | 0             | 0.08283578    | 1.42893599     | 1.43825041     | 1.37626241     | 6.893E-11 | 3.74882  | up        | hypothetical protein MIMGU_mgv1a007352mg [Erythranthe guttata]                                               |
| c21251.graph_c0 | 8.07500501    | 8.16473829    | 8.28039788    | 8.0030006      | 6.04839547     | 7.01411522     | 1.767E-09 | -1.30969 | down      | PREDICTED: metal tolerance protein 1-like isoform X1 [Sesamum indicum]                                       |
| c21257.graph_c0 | 8.55112898    | 10.3286946    | 9.66991458    | 63.5163931     | 63.8212572     | 66.1299716     | 1.409E-51 | 1.66915  | up        | PREDICTED: tubulin beta chain-like [Sesamum indicum]                                                         |
| c21269.graph_c0 | 0             | 0.4811318     | 0.61765492    | 4.36667513     | 4.73123787     | 6.69876195     | 4.467E-07 | 2.7384   | up        | hypothetical protein MIMGU_mgv1a022779mg, partial [Erythranthe guttata]                                      |
| c21278.graph_c0 | 3.01726265    | 3.37561151    | 3.68723815    | 18.4034051     | 18.2277334     | 16.297686      | 1.199E-21 | 1.2991   | up        | PREDICTED: cationic amino acid transporter 3-like [Neelumbo nucifera]                                        |
| c21285.graph_c0 | 0.54944316    | 0.3882306     | 0.08306544    | 2.25505199     | 2.20577555     | 1.6484265      | 0.0022555 | 1.50654  | up        | PREDICTED: pentatricopeptide repeat-containing protein At3g49740 [Sesamum indicum]                           |
| c21292.graph_c0 | 0.28082885    | 0.52708136    | 0.45109524    | 31.8148344     | 35.7748091     | 32.7891067     | 1.14E-170 | 5.22253  | up        | PREDICTED: cytochrome P450 71D95-like [Sesamum indicum]                                                      |
| c21295.graph_c0 | 11.4378769    | 11.8433355    | 10.9789635    | 11.8973259     | 12.0336612     | 12.0973895     | 4.186E-23 | -1.01726 | down      | PREDICTED: uncharacterized protein LOC105161140 [Sesamum indicum]                                            |
| c21305.graph_c0 | 5.58324641    | 2.55142567    | 3.04144581    | 0              | 0              | 0              | 8.498E-14 | -Inf     | down      | hypothetical protein M569_16047 [Genlisea aurea]                                                             |
| c21328.graph_c0 | 34.8213697    | 28.3206934    | 23.9715207    | 23.0483306     | 27.33926       | 25.9982567     | 2.336E-08 | -1.27579 | down      | F-box/WD repeat-containing protein 4 [Theobroma cacao]                                                       |
| c21331.graph_c0 | 83.3967348    | 82.8380883    | 87.3082822    | 82.0172973     | 86.7215527     | 80.6218149     | 1.877E-40 | -1.11545 | down      | PREDICTED: serine acetyltransferase 5-like [Sesamum indicum]                                                 |
| c21343.graph_c0 | 2.92448309    | 2.92741152    | 2.69732914    | 2.74257736     | 2.60010473     | 2.60158285     | 7.477E-10 | -1.19544 | down      | PREDICTED: putative pentatricopeptide repeat-containing protein At5g09950 [Sesamum indicum]                  |
| c21346.graph_c0 | 0             | 0             | 0             | 2.56632007     | 2.87774634     | 2.26297494     | 1.628E-15 | Inf      | up        | PREDICTED: transcription factor MYB28-like [Sesamum indicum]                                                 |
| c21350.graph_c0 | 108.562925    | 118.51188     | 111.813428    | 52.1927992     | 54.1385725     | 51.7973083     | 2.25E-133 | -2.19054 | down      | PREDICTED: ethylene-responsive transcription factor 3-like [Sesamum indicum]                                 |
| c21351.graph_c0 | 0             | 0             | 0.05402426    | 2.71940428     | 2.56572068     | 2.36860798     | 9.905E-17 | 6.01578  | up        | PREDICTED: uncharacterized protein LOC105175340 [Sesamum indicum]                                            |
| c21361.graph_c0 | 2.59261096    | 2.68318018    | 2.31518503    | 29.1905993     | 28.5479327     | 28.6404818     | 1.68E-55  | 2.41933  | up        | PREDICTED: cyclin-D3-3-like [Sesamum indicum]                                                                |
| c21364.graph_c0 | 1.90877171    | 1.3699237     | 1.61980476    | 1.59668567     | 1.58345983     | 1.1747301      | 3.794E-05 | -1.26023 | down      | conserved hypothetical protein [Ricinus communis]                                                            |

| #ID             | 0 h-1<br>FPKM | 0 h-2<br>FPKM | 0 h-3<br>FPKM | 28 h-1<br>FPKM | 28 h-2<br>FPKM | 28 h-3<br>FPKM | FDR       | log2FC   | regulated | nr_annotation                                                                                                             |
|-----------------|---------------|---------------|---------------|----------------|----------------|----------------|-----------|----------|-----------|---------------------------------------------------------------------------------------------------------------------------|
| c21372.graph_c0 | 2.71048774    | 2.65783042    | 2.41683384    | 0.20101703     | 0.36299906     | 0.29525085     | 4.112E-48 | -4.26893 | down      | PREDICTED: galactose oxidase-like [Sesamum indicum]                                                                       |
| c21382.graph_c0 | 1.58291541    | 2.21830065    | 1.52558173    | 0.63274959     | 0.31162557     | 0.61019459     | 5.778E-12 | -2.86397 | down      | -                                                                                                                         |
| c21391.graph_c0 | 19.9278375    | 9.84208249    | 10.7170296    | 0              | 0              | 0              | 2.179E-18 | -Inf     | down      | -                                                                                                                         |
| c21397.graph_c0 | 0.34141048    | 0.57835013    | 0.33748152    | 5.000878       | 5.75617634     | 5.24880794     | 5.606E-20 | 2.58127  | up        | hypothetical protein MIMGU_mgv1a005249mg [Erythranthe guttata]                                                            |
| c21401.graph_c0 | 11.997393     | 4.52710613    | 3.14799933    | 5118.79158     | 4443.51251     | 4010.85951     | 7.8E-187  | 8.35391  | up        | hypothetical protein MIMGU_mgv1a011768mg [Erythranthe guttata]                                                            |
| c21405.graph_c0 | 0.36351466    | 0.7641452     | 0.14013922    | 2.21928304     | 2.76715861     | 2.06961924     | 0.0083314 | 1.39482  | up        | PREDICTED: uncharacterized protein LOC105157791 isoform X1 [Sesamum indicum]                                              |
| c21408.graph_c0 | 384.755952    | 388.145761    | 389.462542    | 94.8222604     | 100.112487     | 109.249508     | 0         | -3.02422 | down      | PREDICTED: zinc finger CCCH domain-containing protein 20-like [Sesamum indicum]                                           |
| c21417.graph_c0 | 10.1092089    | 11.3741289    | 9.45725416    | 3.76182518     | 5.25407762     | 4.38859538     | 1.973E-52 | -2.29656 | down      | PREDICTED: uncharacterized protein LOC105168262 [Sesamum indicum]                                                         |
| c21437.graph_c0 | 287.072556    | 269.564162    | 293.561768    | 125.461781     | 119.187659     | 129.847699     | 2.92E-106 | -2.27355 | down      | PREDICTED: 7-deoxyloganetic acid glucosyltransferase-like [Sesamum indicum]                                               |
| c21448.graph_c0 | 6.03100089    | 4.78406945    | 5.26420183    | 0.41351856     | 0.56005273     | 0.40491332     | 9.843E-53 | -4.63451 | down      | PREDICTED: ethylene-responsive transcription factor ERF053-like [Nelumbo nucifera]                                        |
| c21449.graph_c1 | 0             | 0             | 0             | 1.73847488     | 1.71917314     | 1.35102982     | 5.574E-14 | Inf      | up        | PREDICTED: uncharacterized protein LOC105176193 [Sesamum indicum]                                                         |
| c21453.graph_c0 | 2.29001996    | 2.36248592    | 2.28214531    | 11.7015634     | 11.34747       | 10.9480701     | 1E-15     | 1.20289  | up        | PREDICTED: serine/threonine protein phosphatase 2A 57 kDa regulatory subunit B&apos; theta isoform-like [Sesamum indicum] |
| c21454.graph_c1 | 2.29956846    | 2.79014682    | 1.52229154    | 18.8909026     | 14.6788342     | 16.4893139     | 2.75E-13  | 1.83545  | up        | PREDICTED: calcium-dependent protein kinase 10-like [Sesamum indicum]                                                     |
| c21469.graph_c0 | 30.2881285    | 28.2812489    | 32.7678562    | 261.896617     | 282.033369     | 276.823172     | 6.36E-140 | 2.07586  | up        | PREDICTED: 40S ribosomal protein S3a [Sesamum indicum]                                                                    |
| c21482.graph_c0 | 2.11140665    | 1.74054663    | 1.75562662    | 8.84627661     | 10.0249498     | 11.7852889     | 0.0001144 | 1.36316  | up        | PREDICTED: uncharacterized protein LOC105165376 isoform X2 [Sesamum indicum]                                              |
| c21484.graph_c0 | 0.11535308    | 0.28867146    | 0.29646654    | 2.80857133     | 2.23308535     | 1.94971586     | 3.234E-06 | 2.21946  | up        | PREDICTED: uncharacterized protein LOC105160233 [Sesamum indicum]                                                         |
| c21504.graph_c0 | 4.3992891     | 2.83094635    | 4.71105056    | 1.52256094     | 2.4057771      | 1.18027743     | 1.047E-06 | -2.3204  | down      | PREDICTED: EPIDERMAL PATTERNING FACTOR-like protein 6 [Vitis vinifera]                                                    |
| c21505.graph_c0 | 0             | 0.08396257    | 0.05389365    | 2.28609266     | 1.32104149     | 1.71619831     | 1.967E-08 | 4.17053  | up        | PREDICTED: uncharacterized protein LOC105160466 [Sesamum indicum]                                                         |
| c21513.graph_c0 | 3.98588123    | 5.98480872    | 5.44502515    | 3.54937395     | 4.65395955     | 4.19531802     | 1.845E-05 | -1.40755 | down      | PREDICTED: cyclic nucleotide-gated ion channel 2-like isoform X1 [Sesamum indicum]                                        |
| c21536.graph_c0 | 0.38474834    | 0.26663096    | 0.22819239    | 4.83979978     | 5.49634478     | 4.72153235     | 1.611E-20 | 3.01243  | up        | PREDICTED: protein TRANSPORT INHIBITOR RESPONSE 1-like [Sesamum indicum]                                                  |
| c21538.graph_c0 | 1.48819132    | 1.34071337    | 1.72114629    | 0.64896533     | 1.17190969     | 0.70606721     | 2.373E-07 | -1.94311 | down      | hypothetical protein MIMGU_mgv1a023150mg, partial [Erythranthe guttata]                                                   |

| #ID             | 0 h-1<br>FPKM | 0 h-2<br>FPKM | 0 h-3<br>FPKM | 28 h-1<br>FPKM | 28 h-2<br>FPKM | 28 h-3<br>FPKM | FDR       | log2FC   | regulated | nr_annotation                                                                                              |
|-----------------|---------------|---------------|---------------|----------------|----------------|----------------|-----------|----------|-----------|------------------------------------------------------------------------------------------------------------|
| c21541.graph_c0 | 3.16582966    | 3.68289162    | 3.07865029    | 17.5366407     | 16.8446195     | 15.8066981     | 1.678E-13 | 1.24776  | up        | PREDICTED: uncharacterized protein LOC105166059 [Sesamum indicum]                                          |
| c21544.graph_c0 | 0.50208441    | 0.40206974    | 0.32259917    | 7.59017079     | 8.59946386     | 7.44413147     | 2.072E-20 | 3.18203  | up        | hypothetical protein JCGZ_21387 [Jatropha curcas]                                                          |
| c21554.graph_c0 | 0             | 0.04716574    | 0.03027461    | 6.8662223      | 6.10679355     | 5.99399798     | 3.262E-57 | 6.8351   | up        | PREDICTED: LRR receptor-like serine/threonine-protein kinase RCH1 [Sesamum indicum]                        |
| c21556.graph_c0 | 3.77911651    | 3.58024533    | 4.33599494    | 0.83380146     | 0.68641708     | 0.66036415     | 8.311E-45 | -3.51624 | down      | PREDICTED: ribulose biphosphate carboxylase/oxygenase activase, chloroplastic isoform X2 [Sesamum indicum] |
| c21558.graph_c0 | 0.05364942    | 0.05370314    | 0             | 1.55968358     | 1.79551625     | 1.14542016     | 4.231E-11 | 4.31752  | up        | hypothetical protein CICLE_v10024014mg, partial [Citrus clementina]                                        |
| c21564.graph_c0 | 0.54592569    | 0.34775513    | 0.5739841     | 7.03375004     | 5.60174611     | 6.03381504     | 9.117E-14 | 2.57655  | up        | PREDICTED: methylsterol monooxygenase 1-1-like [Sesamum indicum]                                           |
| c21575.graph_c0 | 0.07506663    | 0.0751418     | 0.03215453    | 23.5508667     | 24.7453176     | 21.7400512     | 4.57E-196 | 7.50354  | up        | PREDICTED: uncharacterized protein LOC105169481 [Sesamum indicum]                                          |
| c21576.graph_c0 | 0             | 0.06896954    | 0.08853993    | 3.15482084     | 3.02936504     | 3.26896259     | 4.84E-13  | 4.79846  | up        | hypothetical protein MIMGU_mgv1a000209mg [Erythranthe guttata]                                             |
| c21581.graph_c0 | 5.12324476    | 4.68457324    | 5.15924179    | 4.8871525      | 4.57427568     | 5.3025611      | 3.575E-13 | -1.11    | down      | PREDICTED: uncharacterized protein LOC105164695 [Sesamum indicum]                                          |
| c21589.graph_c0 | 39.7640546    | 37.7191384    | 37.7791953    | 207.476594     | 214.188964     | 220.456636     | 1.127E-66 | 1.3881   | up        | PREDICTED: 40S ribosomal protein S9-2-like [Sesamum indicum]                                               |
| c21609.graph_c0 | 21.2824483    | 22.9760682    | 21.7483542    | 8.18270963     | 6.1012394      | 7.10779999     | 4.462E-79 | -2.71593 | down      | PREDICTED: pathogenesis-related genes transcriptional activator PTI6 [Sesamum indicum]                     |
| c21617.graph_c0 | 22.5448093    | 19.8799707    | 18.2229628    | 4.75302765     | 4.63034399     | 4.96031008     | 2.748E-90 | -3.16782 | down      | PREDICTED: probable galacturonosyltransferase-like 9 [Sesamum indicum]                                     |
| c21618.graph_c0 | 1.21918692    | 1.38873985    | 0.81036386    | 0.45832656     | 0.60694468     | 0.52358703     | 2.323E-08 | -2.19092 | down      | PREDICTED: protein ODORANT1-like [Sesamum indicum]                                                         |
| c21625.graph_c0 | 0.22637184    | 0.3776642     | 0             | 2.74209584     | 2.42633834     | 2.10327614     | 2.442E-06 | 2.51558  | up        | PREDICTED: transcription factor bHLH68-like [Sesamum indicum]                                              |
| c21625.graph_c1 | 0.37881644    | 0.37919577    | 0.24339706    | 1.92725124     | 1.67797977     | 1.79728145     | 0.005128  | 1.34661  | up        | PREDICTED: transcription factor bHLH68-like [Sesamum indicum]                                              |
| c21628.graph_c0 | 0             | 0.04455761    | 0             | 2.62049728     | 3.65133233     | 3.00946542     | 2.21E-18  | 6.62035  | up        | PREDICTED: F-box/keich-repeat protein At5g26960 [Sesamum indicum]                                          |
| c21629.graph_c0 | 0             | 0             | 0             | 38.5808792     | 41.766253      | 77.7645877     | 2.531E-18 | Inf      | up        | -                                                                                                          |
| c21636.graph_c0 | 33.8016237    | 34.1979938    | 33.5080991    | 12.6343673     | 15.5270779     | 14.2472123     | 1.135E-58 | -2.34969 | down      | PREDICTED: probable histone H2A.3-like [Cicer arietinum]                                                   |
| c21641.graph_c0 | 1.32509301    | 1.06113591    | 1.36223758    | 8.51781877     | 8.98547274     | 7.63154681     | 1.176E-15 | 1.65305  | up        | PREDICTED: uncharacterized protein LOC105157824 isoform X1 [Sesamum indicum]                               |
| c21652.graph_c0 | 7.82113138    | 7.85633706    | 7.52027687    | 37.2265509     | 35.8193924     | 37.1070864     | 1.463E-31 | 1.15755  | up        | PREDICTED: probable phenylalanine--tRNA ligase beta subunit [Sesamum indicum]                              |
| c21657.graph_c0 | 2.12078345    | 1.74827643    | 1.68326779    | 0.45334506     | 0.65492493     | 0.66586655     | 2.99E-12  | -2.73335 | down      | PREDICTED: uncharacterized protein LOC105157568 [Sesamum indicum]                                          |
| c21659.graph_c0 | 5.7155553     | 6.348268      | 4.82940154    | 38.5812896     | 29.9542366     | 38.354198      | 5.298E-12 | 1.57427  | up        | PREDICTED: probable polygalacturonase [Sesamum indicum]                                                    |
| c21672.graph_c0 | 0.1123666     | 0             | 0.14439552    | 3.10336096     | 3.42881697     | 2.79887691     | 8.219E-13 | 4.08331  | up        | PREDICTED: wall-associated receptor kinase-like 20 [Sesamum indicum]                                       |
| c21676.graph_c1 | 7.24258934    | 8.09530428    | 7.29908682    | 7.30496549     | 6.77583356     | 6.76224323     | 6.444E-25 | -1.20956 | down      | PREDICTED: exocyst complex component SEC15B [Sesamum indicum]                                              |

| #ID             | 0 h-1<br>FPKM | 0 h-2<br>FPKM | 0 h-3<br>FPKM | 28 h-1<br>FPKM | 28 h-2<br>FPKM | 28 h-3<br>FPKM | FDR       | log2FC   | regulated | nr_annotation                                                                          |
|-----------------|---------------|---------------|---------------|----------------|----------------|----------------|-----------|----------|-----------|----------------------------------------------------------------------------------------|
| c21704.graph_c0 | 15.3339836    | 16.2165325    | 15.2517193    | 16.6854943     | 15.6149938     | 14.6085393     | 1.891E-27 | -1.08744 | down      | PREDICTED: protein DGCR14 [Sesamum indicum]                                            |
| c21705.graph_c0 | 104.474391    | 102.906771    | 98.8325417    | 80.6012119     | 79.9432442     | 78.1160822     | 1.192E-68 | -1.44956 | down      | PREDICTED: tetraspanin-3-like [Sesamum indicum]                                        |
| c21709.graph_c0 | 1.89049311    | 2.75256168    | 2.87106004    | 0.99927236     | 0.97743669     | 0.84937301     | 1.032E-09 | -2.50626 | down      | PREDICTED: uncharacterized protein LOC105173813 [Sesamum indicum]                      |
| c21716.graph_c0 | 7.29466678    | 5.414945      | 6.74080763    | 4.05075371     | 3.17337644     | 3.35399051     | 2.345E-14 | -1.96911 | down      | unnamed protein product [Vitis vinifera]                                               |
| c21718.graph_c0 | 0             | 0.0165736     | 0             | 0.84234818     | 0.97786469     | 0.80518053     | 2.38E-15  | 6.22512  | up        | PREDICTED: uncharacterized protein LOC105157238 isoform X1 [Sesamum indicum]           |
| c21719.graph_c0 | 0.24338589    | 0.16241973    | 0.3127605     | 3.47886536     | 3.67347725     | 2.93495371     | 7.833E-08 | 2.71489  | up        | hypothetical protein MIMGU_mgv1a015222mg [Erythranthe outtata]                         |
| c21723.graph_c0 | 0.16046604    | 0.05354224    | 0             | 0.89413106     | 0.94771939     | 0.6502989      | 1.427E-05 | 2.47541  | up        | PREDICTED: scarecrow-like protein 28 [Sesamum indicum]                                 |
| c21733.graph_c0 | 14.7732486    | 15.9710852    | 14.4279992    | 8.6510445      | 8.14346855     | 7.81015844     | 1.535E-29 | -1.9668  | down      | -                                                                                      |
| c21735.graph_c0 | 1.70382433    | 2.88628231    | 2.02106005    | 13.05009       | 16.1263791     | 13.3692547     | 1.841E-11 | 1.59453  | up        | PREDICTED: RING-H2 finger protein ATL66 [Sesamum indicum]                              |
| c21738.graph_c0 | 0             | 0             | 0             | 1.78473192     | 1.73230401     | 1.78400018     | 2.091E-14 | Inf      | up        | PREDICTED: uncharacterized protein LOC105171956 [Sesamum indicum]                      |
| c21743.graph_c0 | 0.54860612    | 0.45762955    | 0.50915264    | 4.76253386     | 5.00014133     | 4.98878182     | 8.86E-14  | 2.19312  | up        | hypothetical protein MIMGU_mgv1a004026mg [Erythranthe outtata]                         |
| c21746.graph_c0 | 3.86869203    | 3.4679695     | 3.33901506    | 2.76977675     | 2.31139048     | 2.26011521     | 3.61E-09  | -1.62949 | down      | unnamed protein product [Coffea canephora]                                             |
| c21766.graph_c0 | 11.0619096    | 4.23887762    | 4.66429418    | 0              | 0              | 0              | 1.554E-09 | -Inf     | down      | 60S ribosomal protein L7a [Zea mays]                                                   |
| c21771.graph_c0 | 1.00339128    | 0.89279646    | 0.5253101     | 6.05014871     | 6.24310517     | 7.00859498     | 1.1E-11   | 1.91238  | up        | PREDICTED: replication factor C subunit 3 [Sesamum indicum]                            |
| c21772.graph_c0 | 29.819347     | 26.1671498    | 25.5250194    | 13.5809766     | 15.2233355     | 15.793983      | 5.818E-75 | -1.95849 | down      | PREDICTED: activating signal cointegrator 1 [Sesamum indicum]                          |
| c21774.graph_c0 | 39.6863671    | 37.3484846    | 44.1309174    | 22.9455848     | 20.295564      | 23.1254654     | 6.36E-28  | -1.96021 | down      | PREDICTED: F-box protein At5g39250 [Sesamum indicum]                                   |
| c21785.graph_c0 | 0             | 0.20678885    | 0             | 5.90560892     | 6.41672867     | 6.45246379     | 3.475E-20 | 5.42298  | up        | PREDICTED: protein TORNADO 2 [Sesamum indicum]                                         |
| c21789.graph_c0 | 3.56497991    | 4.84683616    | 3.41876144    | 0.27070221     | 0.24441871     | 0.31555827     | 1.58E-29  | -4.92009 | down      | PREDICTED: COBRA-like protein 10 [Sesamum indicum]                                     |
| c21813.graph_c0 | 0.37704398    | 0.12580718    | 0             | 10.9613357     | 9.40220546     | 9.68972376     | 3.999E-17 | 4.83653  | up        | PREDICTED: probable receptor-like protein kinase At1g80640 [Nicotiana tomentosiformis] |
| c21818.graph_c0 | 6.46476606    | 7.33407148    | 4.9844882     | 2.08824654     | 2.59254989     | 1.87439133     | 7.872E-18 | -2.60695 | down      | -                                                                                      |
| c21827.graph_c0 | 0             | 0             | 0             | 0.72218722     | 0.86241166     | 0.77939529     | 2.231E-12 | Inf      | up        | PREDICTED: L-ascorbate oxidase-like [Sesamum indicum]                                  |
| c21839.graph_c0 | 0.15460317    | 0.15475798    | 0.06622373    | 0.93637242     | 1.25127562     | 1.10026403     | 5.066E-05 | 2.04867  | up        | PREDICTED: uncharacterized protein LOC105177291 [Sesamum indicum]                      |
| c21856.graph_c0 | 0             | 0             | 0             | 1.10461481     | 0.97469625     | 0.77844439     | 1.168E-13 | Inf      | up        | PREDICTED: cytochrome P450 71A8-like [Sesamum indicum]                                 |
| c21857.graph_c0 | 15.1495907    | 11.0685323    | 15.7756504    | 120.547472     | 115.356508     | 121.395215     | 3.445E-78 | 1.99706  | up        | PREDICTED: DNA-binding protein SIFA-like [Nicotiana glauca]                            |
| c21859.graph_c0 | 0.09844465    | 0.03941729    | 0.20240843    | 4.90826161     | 4.79347148     | 4.27366505     | 1.525E-39 | 4.2552   | up        | PREDICTED: oligopeptide transporter 4-like [Sesamum indicum]                           |
| c21881.graph_c0 | 0.35376525    | 0.56659119    | 0.27276141    | 2.51972256     | 3.8072654      | 2.01411236     | 0.0040504 | 1.71686  | up        | PREDICTED: LOW QUALITY PROTEIN: alkaline/neutral invertase CINV2 [Sesamum indicum]     |

| #ID             | 0 h-1<br>FPKM | 0 h-2<br>FPKM | 0 h-3<br>FPKM | 28 h-1<br>FPKM | 28 h-2<br>FPKM | 28 h-3<br>FPKM | FDR       | log2FC   | regulated | nr_annotation                                                                    |
|-----------------|---------------|---------------|---------------|----------------|----------------|----------------|-----------|----------|-----------|----------------------------------------------------------------------------------|
| c21889.graph_c0 | 11.0064193    | 11.5284536    | 9.86646644    | 6.81210683     | 7.34331195     | 7.38727747     | 1.913E-57 | -1.67771 | down      | hypothetical protein MIMGU_mgv1a009265mg [Erythranthe outtata]                   |
| c21894.graph_c0 | 0.04729404    | 0.0946828     | 0             | 1.99363608     | 2.14145837     | 2.49628237     | 2.928E-12 | 4.47233  | up        | PREDICTED: probable membrane-associated kinase regulator 2 [Sesamum indicum]     |
| c21898.graph_c0 | 0             | 0             | 0             | 4.31457212     | 5.87649516     | 4.65442607     | 1.859E-33 | Inf      | up        | PREDICTED: uncharacterized protein LOC105164396 [Sesamum indicum]                |
| c21901.graph_c0 | 0.35569413    | 0.32637944    | 0.30472069    | 3.31762766     | 2.74263927     | 2.72473602     | 1.118E-08 | 2.06516  | up        | vacuolar invertase CvINV [Elsholtzia haichowensis]                               |
| c21905.graph_c0 | 27.7995146    | 28.5442154    | 30.7874461    | 15.8986442     | 13.2441826     | 15.7145169     | 2.944E-52 | -2.04917 | down      | PREDICTED: auxin-induced protein 22D [Sesamum indicum]                           |
| c21908.graph_c0 | 5.94914524    | 5.18590168    | 5.25585993    | 4.46793129     | 3.23705841     | 4.63074825     | 2.002E-23 | -1.49813 | down      | PREDICTED: lysine-specific demethylase JM18 [Sesamum indicum]                    |
| c21911.graph_c0 | 0.70849569    | 0.70920514    | 1.05051348    | 4.87203555     | 5.82955758     | 4.75125658     | 3.348E-06 | 1.5495   | up        | PREDICTED: inositol monophosphatase 3-like [Sesamum indicum]                     |
| c21920.graph_c0 | 3.48093045    | 3.42328597    | 3.21751704    | 1.42030607     | 0.52097631     | 0.97787094     | 3.597E-19 | -2.88252 | down      | PREDICTED: WW domain-containing protein C11B10.08 [Sesamum indicum]              |
| c21925.graph_c0 | 0.24587332    | 0.28127946    | 0.31595695    | 7.65854197     | 8.11353586     | 6.49928001     | 2.161E-30 | 3.62886  | up        | PREDICTED: inactive rhomboid protein 1-like [Sesamum indicum]                    |
| c21938.graph_c0 | 23.5215631    | 23.6241269    | 27.0818099    | 22.02889       | 23.205026      | 22.469243      | 8.731E-16 | -1.22527 | down      | hypothetical protein MIMGU_mgv1a0149401mg [Erythranthe outtata]                  |
| c21940.graph_c0 | 0.16519651    | 0             | 0             | 1.48078771     | 1.8067736      | 1.40425295     | 6.464E-10 | 3.76808  | up        | PREDICTED: uncharacterized protein LOC105161910 [Sesamum indicum]                |
| c21944.graph_c0 | 0.43855056    | 0.36582475    | 1.03318386    | 3.08111485     | 3.74125363     | 2.9476412      | 0.0010143 | 1.30586  | up        | PREDICTED: transcription repressor KAN1-like isoform X4 [Sesamum indicum]        |
| c21947.graph_c0 | 9.43796014    | 9.51871204    | 9.65675534    | 52.7789767     | 54.5724284     | 55.1699671     | 7.781E-48 | 1.41514  | up        | PREDICTED: diaminopimelate decarboxylase 1, chloroplastic-like [Sesamum indicum] |
| c21950.graph_c0 | 1.04646697    | 0.68915451    | 0.81392853    | 5.46406744     | 6.18047942     | 5.42222206     | 1.412E-11 | 1.6543   | up        | PREDICTED: uncharacterized protein LOC105173886 [Sesamum indicum]                |
| c21965.graph_c0 | 23.9577838    | 26.1619352    | 25.3364236    | 17.0791279     | 18.4297978     | 14.4802896     | 6.212E-28 | -1.68606 | down      | PREDICTED: probable methyltransferase PM116 [Sesamum indicum]                    |
| c21969.graph_c0 | 37.4194181    | 35.5840436    | 35.3179221    | 36.8555636     | 37.0028009     | 35.6218118     | 2.503E-27 | -1.07474 | down      | hypothetical protein MIMGU_mgv1a013699mg [Erythranthe outtata]                   |
| c21976.graph_c0 | 1.50828221    | 4.75032283    | 4.11277085    | 53.6608563     | 85.0241371     | 62.5713012     | 2.299E-13 | 3.17959  | up        | PREDICTED: epidermis-specific secreted glycoprotein EP1-like [Sesamum indicum]   |
| c21977.graph_c0 | 0.05250836    | 0.21024378    | 0.13495066    | 19.4248535     | 23.7756126     | 19.5251025     | 6.436E-67 | 6.2052   | up        | gibberellin 3-oxidase [Torenia fournieri]                                        |
| c21979.graph_c0 | 11.4215614    | 10.7564896    | 9.11894471    | 5.10838462     | 4.70109221     | 5.09025786     | 2.414E-30 | -2.15826 | down      | PREDICTED: uncharacterized protein LOC105170847 [Sesamum indicum]                |
| c21982.graph_c0 | 4.62797861    | 5.25374528    | 3.85400976    | 0.46977489     | 0.42416268     | 0.72066504     | 2.32E-47  | -4.17405 | down      | PREDICTED: exocyst complex component EXO70B1 [Sesamum indicum]                   |
| c21992.graph_c0 | 9.58099868    | 8.23022486    | 9.34312058    | 38.5210171     | 39.1507705     | 40.4597009     | 9.393E-15 | 1.03068  | up        | hypothetical protein MIMGU_mgv1a00/464mg [Erythranthe outtata]                   |
| c21997.graph_c0 | 0             | 0             | 0             | 1.35653183     | 1.05470702     | 1.01467566     | 5.437E-11 | Inf      | up        | PREDICTED: uncharacterized protein LOC105158717 [Sesamum indicum]                |
| c22004.graph_c0 | 0.35812537    | 0.35848398    | 0.69030792    | 28.1106134     | 26.6738118     | 24.9557281     | 4.459E-28 | 4.7243   | up        | H(+)-transporting atpase plant/fungi plasma membrane type [Theobroma cacao]      |



| #ID             | 0 h-1<br>FPKM | 0 h-2<br>FPKM | 0 h-3<br>FPKM | 28 h-1<br>FPKM | 28 h-2<br>FPKM | 28 h-3<br>FPKM | FDR       | log2FC   | regulated | nr_annotation                                                                                                 |
|-----------------|---------------|---------------|---------------|----------------|----------------|----------------|-----------|----------|-----------|---------------------------------------------------------------------------------------------------------------|
| c22008.graph_c0 | 4.48035217    | 3.91675901    | 3.68475515    | 2.14915413     | 2.0188881      | 2.07254535     | 1.7E-24   | -2.04138 | down      | hypothetical protein MIMGU_mgv1a027091mg [Erythranthe<br>cuffata]                                             |
| c22023.graph_c0 | 1.63980724    | 1.69274455    | 1.11945915    | 0.63314505     | 0.47078757     | 0.79015712     | 7.428E-10 | -2.31665 | down      | CLAVATA3/ESR (CLE)-related protein 26 [Arabidopsis thaliana]                                                  |
| c22042.graph_c0 | 5.72738724    | 6.29976816    | 7.35991936    | 5.61471298     | 9.46172076     | 5.5887132      | 0.0011801 | -1.00343 | down      | PREDICTED: putative methyltransferase DDB_G0268948 isoform<br>X2 [Sesamum indicum]                            |
| c22045.graph_c0 | 0.07749917    | 0.21333614    | 0.14938426    | 0.95754121     | 0.66114172     | 0.66644201     | 0.0035797 | 1.28106  | up        | PREDICTED: receptor-like protein kinase HEKK_1 [Sesamum<br>indicum]                                           |
| c22047.graph_c0 | 56.7538854    | 51.8116829    | 58.802476     | 55.3730184     | 56.7797251     | 54.0462262     | 3.296E-23 | -1.10161 | down      | PREDICTED: probable serine incorporator [Sesamum indicum]                                                     |
| c22049.graph_c0 | 70.8123996    | 78.4844891    | 59.6063898    | 403.616133     | 389.223006     | 332.385929     | 9.358E-20 | 1.34045  | up        | hypothetical protein MIMGU_mgv1a0152/1mg [Erythranthe<br>cuffata]                                             |
| c22059.graph_c0 | 3.31047319    | 1.88079867    | 2.06955687    | 0              | 0.23485644     | 0.10612449     | 1.23E-13  | -5.50014 | down      | -                                                                                                             |
| c22064.graph_c0 | 1.14636132    | 1.89588481    | 0.89668154    | 6.5566762      | 7.39190294     | 7.38977105     | 2.276E-06 | 1.35144  | up        | PREDICTED: homeobox-leucine zipper protein HOX11-like<br>[Nicotiana tomentosiformis]                          |
| c22065.graph_c0 | 2.26529571    | 1.53870418    | 2.183246      | 1.58760373     | 2.01745844     | 1.72729557     | 0.0010475 | -1.25862 | down      | -                                                                                                             |
| c22068.graph_c0 | 3.93736921    | 4.33544308    | 3.66826461    | 29.4512225     | 29.8645163     | 26.8535229     | 2.473E-45 | 1.76141  | up        | PREDICTED: glycerol-3-phosphate 2-O-acyltransferase 4<br>[Sesamum indicum]                                    |
| c22080.graph_c0 | 6.17516755    | 6.87150189    | 5.89371953    | 2.15689098     | 3.08841254     | 2.77334189     | 2.334E-44 | -2.32971 | down      | PREDICTED: vacuolar protein sorting-associated protein 4-like<br>[Sesamum indicum]                            |
| c22084.graph_c0 | 0.30095808    | 0.25822238    | 0.19337152    | 2.39045666     | 2.53924499     | 2.20557261     | 8.186E-10 | 2.15923  | up        | PREDICTED: uncharacterized protein LOC105169955 isoform X1<br>[Sesamum indicum]                               |
| c22085.graph_c0 | 0.05843516    | 0.01949789    | 0.0250305     | 0.33976269     | 0.35790283     | 0.40431355     | 3.348E-05 | 2.33974  | up        | PREDICTED: WD repeat and HMG-box DNA-binding protein 1<br>[Sesamum indicum]                                   |
| c22088.graph_c0 | 9.17962269    | 9.04744831    | 11.2517396    | 0.30792447     | 0.55605385     | 0.20938654     | 2.176E-55 | -5.8765  | down      | PREDICTED: nuclear transcription factor Y subunit C-2 [Sesamum<br>indicum]                                    |
| c22090.graph_c0 | 21.4134281    | 20.7251065    | 21.4426872    | 111.55313      | 110.710465     | 107.454375     | 4.172E-49 | 1.28374  | up        | PREDICTED: uncharacterized protein LOC105172629 [Sesamum<br>indicum]                                          |
| c22094.graph_c0 | 244.890801    | 271.317847    | 244.597046    | 27.7576198     | 26.7333634     | 31.5269573     | 0         | -4.2343  | down      | PREDICTED: ethylene-responsive transcription factor ERF008-like<br>[Sesamum indicum]                          |
| c22096.graph_c0 | 1.20964319    | 0.64766634    | 0.57839605    | 4.74338405     | 4.24591011     | 4.8048364      | 1.907E-07 | 1.41991  | up        | PREDICTED: probable inactive purple acid phosphatase 29 isoform<br>X2 [Nicotiana glauca]                      |
| c22097.graph_c0 | 0.15539659    | 0.28517903    | 0.26625437    | 12.4988427     | 12.0161071     | 11.1205457     | 3.392E-77 | 4.56017  | up        | PREDICTED: MALE efflux family protein 5-like [Sesamum<br>indicum]                                             |
| c22111.graph_c0 | 0.10675351    | 0.21372082    | 0.41154747    | 3.84059798     | 3.43267262     | 4.55839504     | 2.76E-11  | 2.90994  | up        | PREDICTED: (DL)-glycerol-3-phosphatase 2 [Sesamum indicum]                                                    |
| c22122.graph_c0 | 1.39248111    | 0.85181279    | 2.28644707    | 9.72689853     | 9.69626116     | 9.58871434     | 5.588E-08 | 1.57926  | up        | PREDICTED: plastidial pyruvate kinase 2-like [Sesamum indicum]                                                |
| c22136.graph_c0 | 3.47190995    | 3.96411277    | 3.69471426    | 1.41939233     | 1.56637335     | 1.86600911     | 7.584E-16 | -2.2879  | down      | hypothetical protein MIMGU_mgv1a003925mg [Erythranthe<br>cuffata]                                             |
| c22145.graph_c0 | 0.1851713     | 0.10591813    | 0.10197962    | 2.07639924     | 1.70120181     | 2.44735808     | 4.628E-11 | 2.90285  | up        | PREDICTED: putative pentatricopeptide repeat-containing protein<br>At3g25060, mitochondrial [Sesamum indicum] |
| c22147.graph_c0 | 0.70050943    | 0.88216853    | 0.69691537    | 0.39416223     | 0.53383731     | 0.42884422     | 2.227E-07 | -1.83896 | down      | PREDICTED: glutathione transferase GST1-25-like [Sesamum<br>indicum]                                          |

| #ID             | 0 h-1<br>FPKM | 0 h-2<br>FPKM | 0 h-3<br>FPKM | 28 h-1<br>FPKM | 28 h-2<br>FPKM | 28 h-3<br>FPKM | FDR       | log2FC   | regulated | nr_annotation                                                                                                       |
|-----------------|---------------|---------------|---------------|----------------|----------------|----------------|-----------|----------|-----------|---------------------------------------------------------------------------------------------------------------------|
| c22152.graph_c0 | 0.18850776    | 0.02695665    | 0.03460571    | 1.25262954     | 0.90127123     | 0.95825201     | 1.416E-06 | 2.56584  | up        | PREDICTED: pyruvate kinase isozyme A, chloroplastic-like [Sesamum indicum]                                          |
| c22156.graph_c0 | 31.3519044    | 30.5419233    | 26.2468915    | 5.13151799     | 5.35033479     | 5.2839445      | 4.17E-134 | -3.57131 | down      | PREDICTED: serine/threonine-protein kinase OX11 [Sesamum indicum]                                                   |
| c22160.graph_c0 | 1.44161863    | 1.50719829    | 1.35852715    | 0.51223828     | 0.48352601     | 0.60797418     | 1.64E-13  | -2.51396 | down      | -                                                                                                                   |
| c22176.graph_c0 | 0.26967307    | 0.22495259    | 0.4620541     | 2.09063288     | 1.82865656     | 1.41273103     | 0.0012151 | 1.37821  | up        | hypothetical protein MIMGU_mgv1a009155mg [Erythranthe guttata]                                                      |
| c22178.graph_c0 | 8.85643996    | 11.2758151    | 10.4181433    | 6.22289742     | 7.69058593     | 7.45806792     | 2.132E-14 | -1.60725 | down      | PREDICTED: uncharacterized protein LOC105169534 [Sesamum indicum]                                                   |
| c22183.graph_c0 | 1.26984785    | 0.88272182    | 1.17852567    | 4.89659326     | 5.1618833      | 4.58131961     | 9.732E-05 | 1.04486  | up        | PREDICTED: malonyl-coenzyme:aminoacyl S-O-glucoside-6&apos;&apos;&apos;-O-malonyltransferase-like [Sesamum indicum] |
| c22206.graph_c0 | 1.05529926    | 0.94856456    | 1.19004811    | 5.29063414     | 5.22920188     | 5.6454571      | 1.243E-09 | 1.24732  | up        | hypothetical protein MIMGU_mgv1a010455mg [Erythranthe guttata]                                                      |
| c22209.graph_c0 | 1.75618537    | 1.1796729     | 1.30654974    | 0.26871272     | 0.0909834      | 0.13704211     | 1.942E-23 | -4.18209 | down      | PREDICTED: receptor-like protein kinase HSL1 [Sesamum indicum]                                                      |
| c22212.graph_c0 | 2.23207803    | 1.7874505     | 2.29464691    | 8.76021182     | 9.86264991     | 8.38376326     | 0.0074208 | 1.00447  | up        | hypothetical protein CISIN_1g035370mg [Citrus sinensis]                                                             |
| c22220.graph_c0 | 2.67243728    | 2.93823922    | 3.09639875    | 12.9912017     | 12.7360731     | 12.7832145     | 1.411E-08 | 1.05274  | up        | PREDICTED: ankyrin repeat domain-containing protein EMB506, chloroplastic [Sesamum indicum]                         |
| c22221.graph_c0 | 14.0137811    | 14.7087756    | 13.8121633    | 9.29517205     | 9.82120823     | 9.48098061     | 4.289E-26 | -1.66306 | down      | PREDICTED: probable calcium-binding protein CML15 [Sesamum indicum]                                                 |
| c22228.graph_c0 | 1.88009308    | 2.16226996    | 2.00476101    | 1.74439253     | 2.33628397     | 2.08766808     | 0.0002863 | -1.06248 | down      | PREDICTED: uncharacterized protein LOC105161595 [Sesamum indicum]                                                   |
| c22236.graph_c0 | 3.72716238    | 4.94560443    | 4.23262666    | 0.18899164     | 0.34128346     | 0.56545732     | 4.756E-31 | -4.64573 | down      | -                                                                                                                   |
| c22271.graph_c0 | 7.66546434    | 7.45179956    | 5.49350634    | 4.28555023     | 4.15965881     | 6.60053842     | 4.958E-09 | -1.53815 | down      | PREDICTED: calcium uniporter protein 2, mitochondrial-like [Sesamum indicum]                                        |
| c22278.graph_c0 | 0.34187654    | 0.34221888    | 0.4393249     | 27.4031218     | 29.133273      | 27.6612578     | 1.51E-104 | 5.13362  | up        | PREDICTED: probable serine/threonine-protein kinase At4g35230 [Sesamum indicum]                                     |
| c22283.graph_c0 | 0.11865703    | 0.05938792    | 0.07623949    | 1.7247849      | 1.94664881     | 2.14630085     | 2.802E-09 | 3.4307   | up        | PREDICTED: ethylene-responsive transcription factor 1-like [Sesamum indicum]                                        |
| c22291.graph_c0 | 1.02004313    | 0.69862311    | 1.0348388     | 5.03345418     | 4.33335407     | 5.09427288     | 9.487E-05 | 1.30158  | up        | PREDICTED: ras-related protein Rab7 [Sesamum indicum]                                                               |
| c22292.graph_c0 | 0.85849438    | 1.0868301     | 1.00585815    | 0.82581454     | 0.49708874     | 0.88350261     | 6.75E-06  | -1.50961 | down      | -                                                                                                                   |
| c22303.graph_c0 | 47.456204     | 50.3718192    | 46.5884248    | 46.3157475     | 44.0864021     | 42.4811403     | 4.824E-51 | -1.21045 | down      | PREDICTED: receptor-like protein kinase FERONIA [Sesamum indicum]                                                   |
| c22326.graph_c0 | 70.5696857    | 74.2135978    | 70.6502731    | 32.5521802     | 29.2714376     | 30.597324      | 3.27E-171 | -2.31132 | down      | PREDICTED: EIN5-binding F-box protein 2, partial [Sesamum indicum]                                                  |
| c22331.graph_c0 | 3.88724561    | 3.20446667    | 3.62401543    | 17.5053324     | 18.4566255     | 19.1661529     | 3.426E-17 | 1.27319  | up        | PREDICTED: actin-related protein 6 [Sesamum indicum]                                                                |
| c22337.graph_c0 | 0.31795031    | 0.59981407    | 0.17286024    | 5.38604537     | 5.86620743     | 5.24350267     | 1.011E-45 | 2.83556  | up        | PREDICTED: myosin-9-like [Sesamum indicum]                                                                          |
| c22345.graph_c0 | 31.6982939    | 29.4759887    | 33.8333417    | 156.986652     | 163.341183     | 174.943066     | 6.828E-31 | 1.29084  | up        | ribosomal protein L32 [Medicago sativa]                                                                             |
| c22345.graph_c1 | 59.1561086    | 55.9854166    | 59.8929237    | 286.107649     | 261.622186     | 271.733883     | 4.233E-21 | 1.13621  | up        | PREDICTED: 60S ribosomal protein L32-1 [Sesamum indicum]                                                            |

| #ID             | 0 h-1<br>FPKM | 0 h-2<br>FPKM | 0 h-3<br>FPKM | 28 h-1<br>FPKM | 28 h-2<br>FPKM | 28 h-3<br>FPKM | FDR       | log2FC   | regulated | nr_annotation                                                                                     |
|-----------------|---------------|---------------|---------------|----------------|----------------|----------------|-----------|----------|-----------|---------------------------------------------------------------------------------------------------|
| c22346.graph_c0 | 2.67204732    | 3.04621228    | 2.25733101    | 18.9527606     | 20.5870336     | 19.8378394     | 1.327E-43 | 1.80815  | up        | PREDICTED: uncharacterized protein LOC105163060 [Sesamum indicum]                                 |
| c22348.graph_c0 | 0.07990306    | 0.07998307    | 0.0684524     | 1.80026566     | 1.78277476     | 1.64275501     | 8.227E-12 | 3.42747  | up        | PREDICTED: LOW QUALITY PROTEIN: recQ-mediated genome instability protein 1 [Sesamum indicum]      |
| c22359.graph_c0 | 0             | 0             | 0             | 2.19273993     | 2.79506621     | 4.68364562     | 1.6E-06   | Inf      | up        | calmodulin [Chara corallina]                                                                      |
| c22362.graph_c0 | 6685.5471     | 6693.30449    | 6723.05173    | 192.765877     | 195.974085     | 211.784147     | 0         | -6.15518 | down      | hypothetical protein MIMGU_mgv1a01186/mg [Erythranthe <i>cuttata</i> ]                            |
| c22366.graph_c0 | 0.08612068    | 0.02873564    | 0.03688949    | 5.67500926     | 7.12085471     | 6.02679952     | 4.168E-44 | 5.87334  | up        | PREDICTED: probable LRR receptor-like serine/threonine-protein kinase At4g37250 [Sesamum indicum] |
| c22379.graph_c0 | 0.4735244     | 0.35549892    | 0.3042488     | 3.09739323     | 2.56360103     | 2.94868884     | 0.0001157 | 1.84037  | up        | hypothetical protein MIMGU_mgv1a016/0.5mg [Erythranthe <i>cuttata</i> ]                           |
| c22396.graph_c0 | 288.044775    | 309.121092    | 258.335753    | 178.923662     | 181.691295     | 178.1546       | 9.013E-54 | -1.75611 | down      | PREDICTED: ethylene-responsive transcription factor 4-like [Sesamum indicum]                      |
| c22400.graph_c0 | 4.6239143     | 7.98423918    | 5.12489991    | 1.38626163     | 1.55509805     | 1.1654563      | 3.041E-08 | -3.20154 | down      | PREDICTED: uncharacterized protein LOC105158187 [Sesamum indicum]                                 |
| c22403.graph_c0 | 786.901076    | 826.627547    | 722.444604    | 177.686982     | 161.718163     | 181.722212     | 7.45E-243 | -3.25319 | down      | -                                                                                                 |
| c22409.graph_c0 | 0.81724096    | 0.53173855    | 0.68262154    | 27.4709284     | 30.3007029     | 28.5471468     | 5.09E-112 | 4.31971  | up        | GDP-mannose 3,5-epimerase 1 [Theobroma cacao]                                                     |
| c22410.graph_c0 | 7.12881067    | 5.93950254    | 7.02145453    | 6.36012931     | 6.27484146     | 6.65815108     | 4.167E-11 | -1.14897 | down      | PREDICTED: uncharacterized protein LOC105168803 isoform X1 [Sesamum indicum]                      |
| c22444.graph_c0 | 0.55421266    | 0.63798277    | 0.56974817    | 8.09625127     | 8.14664129     | 8.06910245     | 7.946E-30 | 2.69591  | up        | asparagine synthetase [Striga hermonthica]                                                        |
| c22447.graph_c0 | 0.4365081     | 0.71783854    | 0.40066442    | 24.8136051     | 28.7062242     | 24.4821494     | 3.42E-102 | 4.55994  | up        | hypothetical protein SBB1_14t00005 [Solanum bulbocastanum]                                        |
| c22453.graph_c0 | 3.71997801    | 3.79892932    | 4.29745851    | 17.0139322     | 17.5935421     | 17.8052979     | 3.184E-22 | 1.05679  | up        | PREDICTED: probable receptor protein kinase TMK1 [Sesamum indicum]                                |
| c22457.graph_c0 | 0.11409707    | 0.14276415    | 0.10996444    | 2.05239608     | 1.72209245     | 1.69165499     | 1.6E-09   | 2.8076   | up        | PREDICTED: putative pentatricopeptide repeat-containing protein At1g68930 [Sesamum indicum]       |
| c22469.graph_c0 | 4.00702817    | 4.0110406     | 2.7355071     | 0              | 0              | 0              | 1.183E-33 | -Inf     | down      | -                                                                                                 |
| c22477.graph_c0 | 0.34554891    | 0.17294746    | 0.0555055     | 1.22432191     | 1.13379271     | 0.89657138     | 0.0059373 | 1.42941  | up        | PREDICTED: kinetochore protein Spc25 [Sesamum indicum]                                            |
| c22480.graph_c0 | 0.20337371    | 0.67859118    | 0.37749582    | 4.56571251     | 5.48666122     | 4.86470158     | 1.438E-20 | 2.473    | up        | PREDICTED: protein LONGIFOLIA 1-like [Sesamum indicum]                                            |
| c22481.graph_c0 | 11.6759149    | 11.1488162    | 9.94946954    | 8.30543471     | 9.45529723     | 9.84653597     | 3.623E-23 | -1.3357  | down      | PREDICTED: uncharacterized protein LOC105156396 [Sesamum indicum]                                 |
| c22502.graph_c0 | 4.65501698    | 4.96690981    | 5.45600146    | 31.5645093     | 31.8902271     | 31.1867615     | 3.9E-29   | 1.55744  | up        | PREDICTED: NAP1-related protein 2-like [Sesamum indicum]                                          |
| c22518.graph_c0 | 0.09031828    | 0.22602181    | 0.11606257    | 1.4769632      | 1.48173255     | 2.31664283     | 7.799E-06 | 2.52094  | up        | PREDICTED: DNA (cytosine-5)-methyltransferase CMT3 [Sesamum indicum]                              |
| c22532.graph_c0 | 0.35416865    | 0.23634886    | 0.60682765    | 2.31666958     | 2.40162216     | 2.38048288     | 0.0005233 | 1.46787  | up        | unnamed protein product [Coffea canephora]                                                        |
| c22543.graph_c0 | 0.84718558    | 0.93889468    | 0.77761929    | 0.83563302     | 0.97290566     | 0.75364548     | 0.0021351 | -1.09099 | down      | PREDICTED: uncharacterized protein LOC105155579 [Sesamum indicum]                                 |

| #ID             | 0 h-1<br>FPKM | 0 h-2<br>FPKM | 0 h-3<br>FPKM | 28 h-1<br>FPKM | 28 h-2<br>FPKM | 28 h-3<br>FPKM | FDR       | log2FC   | regulated | nr_annotation                                                                              |
|-----------------|---------------|---------------|---------------|----------------|----------------|----------------|-----------|----------|-----------|--------------------------------------------------------------------------------------------|
| c22552.graph_c0 | 5.78221411    | 5.13213963    | 5.26230457    | 1.85718658     | 1.84885154     | 2.06917086     | 1.6E-78   | -2.57504 | down      | PREDICTED: pentatricopeptide repeat-containing protein At3g26540 [Sesamum indicum]         |
| c22556.graph_c0 | 15.6975032    | 15.9025378    | 14.6226117    | 14.7307101     | 15.1207295     | 13.2913203     | 2.332E-30 | -1.18963 | down      | PREDICTED: E3 ubiquitin-protein ligase RING1-like [Sesamum indicum]                        |
| c22557.graph_c0 | 62.6485339    | 60.626933     | 64.6838882    | 61.9164312     | 66.5391073     | 61.0467531     | 4.258E-30 | -1.07959 | down      | PREDICTED: uncharacterized protein LOC105167256 isoform X2 [Sesamum indicum]               |
| c22559.graph_c0 | 0.64735733    | 0.43200371    | 0.55458653    | 7.99842482     | 6.42884268     | 5.98916057     | 3.672E-16 | 2.55321  | up        | PREDICTED: formin-like protein 6 [Sesamum indicum]                                         |
| c22564.graph_c0 | 0             | 0.0816331     | 0             | 3.4080893      | 2.32795742     | 2.78097304     | 3.61E-17  | 5.62358  | up        | PREDICTED: polygalacturonase-like [Sesamum indicum]                                        |
| c22577.graph_c0 | 5.37840698    | 4.1724393     | 4.14687955    | 4.98396888     | 3.97063818     | 3.26945086     | 0.000182  | -1.25313 | down      | PREDICTED: uncharacterized protein LOC105177681 [Sesamum indicum]                          |
| c22594.graph_c0 | 0.26892655    | 0.40379376    | 0.11519376    | 3.87650966     | 2.64715318     | 2.68473297     | 4.425E-07 | 2.46513  | up        | hypothetical protein MIMGU_mgv1a000346mg [Erythranthe guttata]                             |
| c22603.graph_c0 | 6.39350022    | 6.92833465    | 5.95464378    | 1.30023993     | 1.27022383     | 0.99141237     | 3.249E-84 | -3.52669 | down      | PREDICTED: uncharacterized protein LOC105179085 [Sesamum indicum]                          |
| c22607.graph_c0 | 10.8315808    | 11.722795     | 9.48753044    | 11.8757806     | 9.64436961     | 10.0199635     | 4.041E-16 | -1.11154 | down      | PREDICTED: uncharacterized protein LOC105179586 [Sesamum indicum]                          |
| c22632.graph_c0 | 0.41524888    | 0.51958086    | 1.46743095    | 8.9031146      | 9.74178742     | 8.61933587     | 2.552E-10 | 2.39643  | up        | PREDICTED: zinc finger HIT domain-containing protein 3 [Sesamum indicum]                   |
| c22634.graph_c0 | 0.06592552    | 0.04399435    | 0.05647793    | 1.16591429     | 2.1631054      | 2.51528319     | 7.423E-07 | 4.04652  | up        | PREDICTED: DNA replication licensing factor MCM3 homolog 2 [Sesamum indicum]               |
| c22637.graph_c0 | 0.19764727    | 0.16487099    | 0.29631533    | 4.74041358     | 6.65800957     | 5.50916734     | 4.256E-21 | 3.58415  | up        | sucrose transporter 1 [Verbascum phoeniceum]                                               |
| c22642.graph_c0 | 0.22355023    | 0.11188704    | 0.28727089    | 2.43712523     | 3.22739351     | 2.51898743     | 2.327E-07 | 2.61904  | up        | -                                                                                          |
| c22646.graph_c1 | 0.07766931    | 0.23324125    | 0.09980814    | 2.82248028     | 2.19165415     | 2.76374503     | 1.701E-08 | 3.15449  | up        | hypothetical protein MIMGU_mgv1a025026mg, partial [Erythranthe guttata]                    |
| c22658.graph_c0 | 0             | 0             | 0.11456155    | 1.38226895     | 1.69658055     | 1.26891019     | 1.494E-12 | 4.11481  | up        | -                                                                                          |
| c22663.graph_c0 | 1.68171604    | 1.37165928    | 1.62747375    | 0.9959168      | 0.53135697     | 0.7387818      | 1.328E-15 | -2.13686 | down      | PREDICTED: putative calcium-transporting ATPase 13, plasma membrane-type [Sesamum indicum] |
| c22683.graph_c0 | 2.20462883    | 2.24488533    | 2.53996271    | 1.68518971     | 1.57145579     | 1.98375232     | 9.354E-08 | -1.5069  | down      | PREDICTED: glycerate dehydrogenase HPR, peroxisomal [Sesamum indicum]                      |
| c22686.graph_c0 | 0             | 0             | 0.07880629    | 2.3622818      | 1.52926266     | 1.81849307     | 2.347E-12 | 5.04895  | up        | PREDICTED: uncharacterized protein LOC105161798 [Sesamum indicum]                          |
| c22691.graph_c0 | 0.86634041    | 0.74106859    | 0.78941796    | 0              | 0              | 0              | 2.208E-48 | -Inf     | down      | PREDICTED: geraniol 8-hydroxylase [Vitis vinifera]                                         |
| c22722.graph_c0 | 4.87144316    | 2.73875573    | 4.54492957    | 0.38800403     | 0.61307971     | 0.59364023     | 1.787E-11 | -4.02075 | down      | PREDICTED: protein UPSTREAM OF FLC [Sesamum indicum]                                       |
| c22728.graph_c0 | 2.53850363    | 2.79515011    | 1.9572466     | 1.89109405     | 1.91570997     | 2.25822044     | 2.976E-05 | -1.35178 | down      | hypothetical protein MIMGU_mgv1a020957mg, partial [Erythranthe guttata]                    |
| c22730.graph_c0 | 16.6542668    | 17.4440888    | 15.7563873    | 15.0162561     | 14.2868701     | 12.8257191     | 8.708E-29 | -1.33319 | down      | PREDICTED: ABC transporter B family member 20 isoform X2 [Nicotiana tomentosiformis]       |

| #ID             | 0 h-1<br>FPKM | 0 h-2<br>FPKM | 0 h-3<br>FPKM | 28 h-1<br>FPKM | 28 h-2<br>FPKM | 28 h-3<br>FPKM | FDR       | log2FC   | regulated | nr_annotation                                                                               |
|-----------------|---------------|---------------|---------------|----------------|----------------|----------------|-----------|----------|-----------|---------------------------------------------------------------------------------------------|
| c22740.graph_c0 | 0.16513605    | 0.08265071    | 0.15915478    | 8.85146999     | 10.8908579     | 7.93275804     | 4.649E-32 | 4.99466  | up        | PREDICTED: probable WRKY transcription factor 29 [Sesamum indicum]                          |
| c22750.graph_c0 | 4.66532669    | 4.56386199    | 6.7445207     | 26.0084599     | 25.3270669     | 25.0899368     | 9.352E-14 | 1.16244  | up        | hypothetical protein MIMGU_mgv1a013190mg [Erythranthe nuttallii]                            |
| c22752.graph_c0 | 4.12406373    | 4.12819335    | 3.31224073    | 26.8824447     | 25.2026253     | 24.8402543     | 5.708E-11 | 1.64587  | up        | PREDICTED: transcription termination factor 4, mitochondrial [Sesamum indicum]              |
| c22756.graph_c0 | 0.03756984    | 0             | 0             | 0.98299966     | 0.88755652     | 1.15861733     | 3.97E-12  | 5.27546  | up        | PREDICTED: uncharacterized protein LOC105158433 [Sesamum indicum]                           |
| c22766.graph_c0 | 88.5579153    | 79.2467087    | 81.9792512    | 16.0301254     | 14.2982615     | 16.9253114     | 0         | -3.49137 | down      | PREDICTED: uncharacterized protein LOC104211375 [Nicotiana sylvestris]                      |
| c22771.graph_c0 | 1.47319632    | 2.06454011    | 2.27173872    | 8.99396901     | 7.73401024     | 12.7558901     | 0.0040687 | 1.25055  | up        | PREDICTED: CBL-interacting serine/threonine-protein kinase 23-like [Tarenaya hassleriana]   |
| c22778.graph_c0 | 0.14139626    | 0             | 0             | 3.13436252     | 3.66512791     | 4.06702589     | 5.412E-14 | 5.20586  | up        | PREDICTED: LOW QUALITY PROTEIN: 4-coumarate--CoA ligase 1-like [Sesamum indicum]            |
| c22778.graph_c1 | 0             | 0             | 0             | 3.21648381     | 3.66006663     | 3.5594223      | 1.283E-17 | Inf      | up        | 4-coumarate coenzyme A ligase [Paulownia fortunei]                                          |
| c22780.graph_c0 | 1.29267178    | 2.10868565    | 2.70703387    | 37.510663      | 32.8003994     | 34.4699361     | 1.386E-72 | 3.00182  | up        | PREDICTED: uncharacterized protein At4g06744-like [Sesamum indicum]                         |
| c22800.graph_c0 | 1.43368979    | 1.15372827    | 1.11985868    | 0.10215662     | 0.07379028     | 0.01667179     | 2.213E-33 | -5.3593  | down      | -                                                                                           |
| c22803.graph_c0 | 3.70717423    | 2.83199225    | 3.25948703    | 0.99265632     | 1.02431495     | 2.14071283     | 5.285E-10 | -2.32241 | down      | -                                                                                           |
| c22837.graph_c0 | 106.098355    | 108.183843    | 122.423567    | 23.5156308     | 23.5915664     | 27.8767175     | 1.651E-58 | -3.25845 | down      | PREDICTED: cytochrome P450 86B1-like [Sesamum indicum]                                      |
| c22838.graph_c0 | 8.5955291     | 7.56645145    | 6.82717693    | 5.3367878      | 6.77441143     | 5.17449766     | 1.278E-19 | -1.50019 | down      | PREDICTED: uncharacterized protein LOC105171100 [Sesamum indicum]                           |
| c22841.graph_c0 | 1.60960748    | 1.99484289    | 2.06840934    | 0.61278037     | 0.65388017     | 0.36365366     | 3.337E-12 | -2.89458 | down      | -                                                                                           |
| c22844.graph_c0 | 0.54395153    | 0.27224811    | 0.34949962    | 4.34874918     | 3.56955707     | 4.03243616     | 6.214E-06 | 2.27219  | up        | PREDICTED: solute carrier family 35 member F1-like isoform X1 [Sesamum indicum]             |
| c22846.graph_c0 | 0.51988252    | 0.59474641    | 0.76350814    | 4.15632383     | 5.4585756      | 3.3915263      | 3.179E-05 | 1.69461  | up        | PREDICTED: protein MIZU-KUSSEI 1-like [Sesamum indicum]                                     |
| c22847.graph_c0 | 3.02674162    | 2.7267952     | 2.59298854    | 12.0623374     | 11.7518592     | 12.1763128     | 1.062E-06 | 1.01972  | up        | PREDICTED: scarecrow-like protein 9 [Sesamum indicum]                                       |
| c22852.graph_c0 | 0.11113576    | 0.11124705    | 0.14281386    | 5.73487114     | 5.39684183     | 5.33870774     | 1.211E-12 | 4.40089  | up        | -                                                                                           |
| c22852.graph_c1 | 5.48943407    | 4.93612437    | 4.06509769    | 75.4659826     | 81.5710682     | 82.271704      | 1.628E-90 | 2.9589   | up        | PREDICTED: HMG-Y-related protein A-like [Sesamum indicum]                                   |
| c22864.graph_c0 | 0.09697454    | 0.48535822    | 0             | 17.4086923     | 16.35479       | 15.1830469     | 7.402E-33 | 5.31488  | up        | PREDICTED: NADPH--cytochrome P450 reductase-like [Sesamum indicum]                          |
| c22871.graph_c0 | 26.7655364    | 27.4205487    | 24.019671     | 25.1607412     | 26.3130114     | 24.5747838     | 1.041E-43 | -1.12968 | down      | PREDICTED: calcium-transporting ATPase 4, endoplasmic reticulum-type-like [Sesamum indicum] |
| c22886.graph_c0 | 0             | 0.10780318    | 0.13839277    | 1.80026405     | 1.1307615      | 1.56480516     | 1.206E-08 | 3.0823   | up        | PREDICTED: alcohol dehydrogenase-like 4 [Sesamum indicum]                                   |
| c22889.graph_c0 | 29.676431     | 30.4608071    | 27.3905449    | 21.4690347     | 20.9586749     | 20.6889687     | 1.107E-43 | -1.56124 | down      | PREDICTED: zinc finger protein 598 [Sesamum indicum]                                        |

| #ID             | 0 h-1<br>FPKM | 0 h-2<br>FPKM | 0 h-3<br>FPKM | 28 h-1<br>FPKM | 28 h-2<br>FPKM | 28 h-3<br>FPKM | FDR       | log2FC   | regulated | nr_annotation                                                                                                      |
|-----------------|---------------|---------------|---------------|----------------|----------------|----------------|-----------|----------|-----------|--------------------------------------------------------------------------------------------------------------------|
| c22923.graph_c0 | 0.44268615    | 0.88625887    | 1.13773846    | 7.85049856     | 7.6692694      | 8.29622089     | 4.459E-09 | 2.17139  | up        | PREDICTED: uncharacterized protein LOC102582737 [Solanum tuberosum]                                                |
| c22943.graph_c0 | 41.2114345    | 46.4975438    | 41.5638688    | 39.1795714     | 32.6644615     | 35.8544415     | 2.576E-34 | -1.35356 | down      | PREDICTED: dot zinc finger protein DUF5.1-like [Sesamum indicum]                                                   |
| c22951.graph_c0 | 441.109685    | 421.822618    | 432.806823    | 323.592201     | 379.262146     | 388.269323     | 8.217E-55 | -1.33804 | down      | PREDICTED: 1-Cys peroxiredoxin [Phoenix dactylifera]                                                               |
| c22986.graph_c0 | 34.8029518    | 32.7689609    | 32.1551537    | 29.076702      | 30.443445      | 30.7085525     | 1.305E-43 | -1.23395 | down      | PREDICTED: ninja-family protein mc410 [Sesamum indicum]                                                            |
| c22991.graph_c0 | 5.41089771    | 4.92392355    | 5.82946542    | 44.8873584     | 49.6391515     | 47.1946524     | 5.904E-57 | 2.04022  | up        | PREDICTED: uncharacterized protein LOC105174944 [Sesamum indicum]                                                  |
| c22996.graph_c0 | 26.1039194    | 27.9591626    | 25.1584274    | 24.3223324     | 24.4275198     | 22.8811285     | 5.506E-33 | -1.23548 | down      | PREDICTED: putative F-box/LRR-repeat protein 25 [Sesamum indicum]                                                  |
| c22998.graph_c0 | 0.19127284    | 0.09573219    | 0.49158635    | 8.68849992     | 8.66077049     | 8.39425806     | 8.936E-17 | 3.94001  | up        | PREDICTED: probable ADP-ribosylation factor GTPase-activating protein AGD11 [Sesamum indicum]                      |
| c23011.graph_c0 | 0.33222277    | 0.16627772    | 0.42691942    | 6.27789753     | 8.17550893     | 7.68406968     | 2.946E-10 | 3.48407  | up        | -                                                                                                                  |
| c23025.graph_c0 | 16.4244684    | 11.6121148    | 16.2354555    | 6.92858981     | 7.46181724     | 7.22035309     | 2.972E-11 | -2.12604 | down      | PREDICTED: MATH domain-containing protein At5g43560-like [Sesamum indicum]                                         |
| c23026.graph_c0 | 8.11233381    | 6.11315309    | 6.44221188    | 1.98741487     | 1.79444929     | 1.45954288     | 1.075E-26 | -3.0686  | down      | -                                                                                                                  |
| c23028.graph_c0 | 0.90521784    | 0.69469528    | 0.34897223    | 3.07023319     | 3.16815167     | 2.95265757     | 0.0005767 | 1.15729  | up        | PREDICTED: sodium-coupled neutral amino acid transporter 1 [Sesamum indicum]                                       |
| c23036.graph_c0 | 1.90976021    | 1.99856675    | 1.8963635     | 7.57092388     | 9.45623761     | 10.0904264     | 0.0002441 | 1.13427  | up        | PREDICTED: anthocyanidin 3-O-glucoside 2'&apos;&apos;&apos;-O-xylosyltransferase-like isoform X3 [Sesamum indicum] |
| c23056.graph_c0 | 7.20146288    | 9.84410328    | 8.75662917    | 76.5962271     | 71.2426263     | 77.5188832     | 9.477E-62 | 2.03488  | up        | PREDICTED: uncharacterized protein At1g66480-like [Sesamum indicum]                                                |
| c23062.graph_c0 | 0.61304676    | 0.20455354    | 0.39389468    | 2.89613252     | 3.75478009     | 2.90857906     | 7.786E-05 | 1.89301  | up        | -                                                                                                                  |
| c23070.graph_c0 | 0.27430736    | 0             | 0.11749861    | 196.374535     | 311.653697     | 208.664495     | 5.521E-39 | 9.75501  | up        | PREDICTED: EG45-like domain containing protein [Sesamum indicum]                                                   |
| c23071.graph_c0 | 1.41954971    | 1.06572838    | 1.29212579    | 0.17195343     | 0.11644337     | 0.10523444     | 4.763E-19 | -4.35355 | down      | -                                                                                                                  |
| c23072.graph_c0 | 2.74060658    | 2.46198156    | 2.4381609     | 18.0799334     | 21.0281498     | 18.3371591     | 6.706E-17 | 1.82067  | up        | PREDICTED: protein RDM1 [Sesamum indicum]                                                                          |
| c23075.graph_c1 | 23.6754363    | 25.3668612    | 23.1559478    | 9.52767411     | 10.9906081     | 10.8947067     | 1.637E-97 | -2.29049 | down      | PREDICTED: E3 ubiquitin-protein ligase CIP8-like [Sesamum indicum]                                                 |
| c23078.graph_c0 | 0.09888119    | 0.29694062    | 0.12706625    | 4.02451175     | 3.89331083     | 3.16668412     | 4.675E-09 | 3.31554  | up        | PREDICTED: probable sugar phosphate/phosphate translocator At3g17430 [Nicotiana tomentosiformis]                   |
| c23083.graph_c0 | 17.9512557    | 17.2099679    | 16.2451227    | 18.3758721     | 17.0894403     | 16.6439633     | 2.222E-05 | -1.06998 | down      | -                                                                                                                  |
| c23084.graph_c1 | 0.81292692    | 0.48824456    | 1.25357193    | 26.5873769     | 18.2444905     | 20.8272791     | 4.95E-16  | 3.58516  | up        | PREDICTED: elongation of fatty acids protein 3-like [Populus euphratica]                                           |
| c23085.graph_c0 | 291.313747    | 326.521369    | 313.623422    | 18.1876681     | 27.2737749     | 23.4143388     | 2.4E-222  | -4.84882 | down      | PREDICTED: zinc finger protein ZAT10-like [Sesamum indicum]                                                        |
| c23086.graph_c0 | 0             | 0.14711949    | 0             | 3.41819623     | 4.58124246     | 3.13787274     | 8.519E-14 | 5.1592   | up        | myb family transcription factor family protein [Populus trichocarpa]                                               |
| c23103.graph_c0 | 0.55078956    | 0.39381507    | 0.20222468    | 8.40652427     | 6.66087834     | 6.48634059     | 4.766E-13 | 3.15223  | up        | PREDICTED: uncharacterized protein LOC105172657 [Sesamum indicum]                                                  |

| #ID             | 0 h-1<br>FPKM | 0 h-2<br>FPKM | 0 h-3<br>FPKM | 28 h-1<br>FPKM | 28 h-2<br>FPKM | 28 h-3<br>FPKM | FDR       | log2FC   | regulated | nr_annotation                                                                              |
|-----------------|---------------|---------------|---------------|----------------|----------------|----------------|-----------|----------|-----------|--------------------------------------------------------------------------------------------|
| c23112.graph_c0 | 1160.41187    | 1150.0643     | 1254.61612    | 200.819277     | 215.119334     | 210.580553     | 3.34E-140 | -3.60015 | down      | hypothetical protein MIMGU_mgv1a018508mg [Erythranthe<br>cuttata]                          |
| c23113.graph_c0 | 8.81079134    | 7.42704338    | 9.53449743    | 38.2195742     | 43.3945281     | 41.5824806     | 2.739E-14 | 1.16489  | up        | -                                                                                          |
| c23115.graph_c0 | 2.11809863    | 2.43825252    | 1.53103534    | 23.610883      | 27.5558305     | 23.0347548     | 2.324E-44 | 2.52071  | up        | PREDICTED: probable glucan endo-1,3-beta-glucosidase A6<br>[Sesamum indicum]               |
| c23120.graph_c0 | 0.54008683    | 0.84955773    | 0.39659026    | 11.6077319     | 11.493321      | 10.5699958     | 7.813E-19 | 3.15032  | up        | hypothetical protein MIMGU_mgv1a016344mg [Erythranthe<br>cuttata]                          |
| c23122.graph_c0 | 12.6156819    | 13.8613823    | 12.2815536    | 10.3730156     | 9.68641828     | 11.2731324     | 2.654E-45 | -1.39614 | down      | PREDICTED: exocyst complex component SEC15B [Sesamum<br>indicum]                           |
| c23128.graph_c0 | 52.9299247    | 51.6512187    | 50.8601451    | 19.2345821     | 21.1709326     | 21.6972203     | 8.5E-154  | -2.41347 | down      | PREDICTED: omega-6 fatty acid desaturase, endoplasmic<br>reticulum [Sesamum indicum]       |
| c23134.graph_c0 | 13.6457391    | 12.2359178    | 12.5974325    | 12.1386692     | 13.1044436     | 12.7760853     | 5.518E-24 | -1.10714 | down      | PREDICTED: U-box domain-containing protein 8 [Sesamum<br>indicum]                          |
| c23146.graph_c0 | 0.44216564    | 0.4426084     | 0.56820036    | 3.33414569     | 4.60630676     | 3.441768       | 2.259E-06 | 1.8747   | up        | PREDICTED: uncharacterized protein LOC105156632 [Sesamum<br>indicum]                       |
| c23151.graph_c0 | 0.41287815    | 0.4959499     | 0.74279068    | 6.84176608     | 5.41883622     | 8.52115433     | 2.109E-08 | 2.5571   | up        | PREDICTED: copper transporter 6-like [Sesamum indicum]                                     |
| c23152.graph_c0 | 132.359843    | 104.083664    | 138.333754    | 41.6978151     | 36.7661868     | 39.1034463     | 1.334E-21 | -2.7643  | down      | -                                                                                          |
| c23170.graph_c0 | 1.27508361    | 1.81635905    | 1.32343044    | 40.9540466     | 41.8694005     | 38.5079668     | 5.84E-112 | 3.69017  | up        | PREDICTED: BES1/BZR1 homolog protein 2 [Sesamum indicum]                                   |
| c23171.graph_c0 | 1.05479129    | 0.9838579     | 1.47867116    | 7.09120011     | 6.65439159     | 7.20807179     | 3.326E-14 | 1.47938  | up        | PREDICTED: probable arabinosyltransferase ARAD1 [Sesamum<br>indicum]                       |
| c23186.graph_c0 | 1.62755949    | 1.3033514     | 1.43415661    | 15.1073338     | 17.0582614     | 15.5541119     | 2.227E-29 | 2.36081  | up        | PREDICTED: probable aquaporin SIP2-1 [Sesamum indicum]                                     |
| c23196.graph_c0 | 0.24161531    | 0.4837145     | 0.15524262    | 3.51209231     | 2.85398106     | 2.36431688     | 7.9E-06   | 2.22422  | up        | BnaC01g07200D [Brassica napus]                                                             |
| c23201.graph_c0 | 0             | 0             | 0.23369216    | 6.21207902     | 4.77355312     | 5.71611287     | 2.032E-12 | 5.0295   | up        | PREDICTED: cytochrome P450 71D11-like [Beta vulgaris subsp.<br>vulgaris]                   |
| c23225.graph_c0 | 3.03923356    | 3.61629141    | 3.53708872    | 14.920477      | 18.5143061     | 19.2827315     | 4.609E-10 | 1.27926  | up        | PREDICTED: GA1A transcription factor 15-like [Sesamum<br>indicum]                          |
| c23258.graph_c1 | 10.1705138    | 12.3440963    | 12.4160372    | 2.77195154     | 2.75309358     | 2.1864935      | 3.458E-33 | -3.27305 | down      | -                                                                                          |
| c23259.graph_c0 | 12.7371725    | 14.3436677    | 13.412479     | 5.5715253      | 7.85542067     | 5.77032814     | 7.935E-43 | -2.16868 | down      | PREDICTED: uncharacterized protein LOC105165738 [Sesamum<br>indicum]                       |
| c23266.graph_c0 | 1078.60554    | 1065.59275    | 1153.72731    | 167.729416     | 154.211522     | 193.326208     | 5.93E-172 | -3.76869 | down      | PREDICTED: stem-specific protein TSJT1-like [Sesamum indicum]                              |
| c23267.graph_c0 | 18.0768003    | 22.4951505    | 18.9639552    | 11.9318854     | 12.9221615     | 12.0506925     | 8.61E-22  | -1.78066 | down      | PREDICTED: U-box domain-containing protein 38-like [Sesamum<br>indicum]                    |
| c23284.graph_c0 | 28.1138564    | 24.8633276    | 29.4631374    | 28.7648871     | 28.3005199     | 27.842545      | 1.022E-06 | -1.04911 | down      | Zinc finger A20 and AN1 domain-containing stress-associated<br>protein 8 [Morus notabilis] |
| c23287.graph_c0 | 0.04441129    | 0.08891152    | 0.11414053    | 1.61389348     | 1.36976282     | 1.5539702      | 1.431E-08 | 3.09675  | up        | PREDICTED: GDSL esterase/lipase At5g33370-like isoform X1<br>[Sesamum indicum]             |
| c23298.graph_c0 | 2.52925199    | 2.95374876    | 2.76867947    | 1.49782989     | 2.21301811     | 1.49999354     | 1.256E-09 | -1.75579 | down      | hypothetical protein MIMGU_mgv1a008021mg [Erythranthe<br>cuttata]                          |
| c23299.graph_c0 | 5.85058812    | 4.93174451    | 5.38147517    | 1.16375281     | 1.17200118     | 1.53398989     | 1.233E-30 | -3.15099 | down      | PREDICTED: B-box zinc finger protein 21 [Vitis vinifera]                                   |

| #ID             | 0 h-1<br>FPKM | 0 h-2<br>FPKM | 0 h-3<br>FPKM | 28 h-1<br>FPKM | 28 h-2<br>FPKM | 28 h-3<br>FPKM | FDR       | log2FC   | regulated | nr_annotation                                                                                                   |
|-----------------|---------------|---------------|---------------|----------------|----------------|----------------|-----------|----------|-----------|-----------------------------------------------------------------------------------------------------------------|
| c23300.graph_c0 | 11.854125     | 11.8242134    | 13.4093485    | 4.823472       | 4.05384377     | 4.13394716     | 6.98E-50  | -2.6036  | down      | PREDICTED: uncharacterized protein LOC105160924 [Sesamum indicum]                                               |
| c23305.graph_c0 | 0.20244915    | 0.33775313    | 0.26015518    | 4.61035153     | 3.67558893     | 3.52188095     | 4.563E-09 | 2.79046  | up        | PREDICTED: uncharacterized protein LOC105163284 [Sesamum indicum]                                               |
| c23307.graph_c0 | 0.59926318    | 0.59986325    | 1.30320708    | 6.13107752     | 7.19954962     | 5.79571993     | 2.3E-10   | 1.8316   | up        | PREDICTED: thermospermine synthase ACAULIS5-like [Sesamum indicum]                                              |
| c23310.graph_c0 | 8.59442473    | 6.22346905    | 4.22968444    | 28.3080551     | 28.9194565     | 27.6539022     | 8.026E-05 | 1.07323  | up        | -                                                                                                               |
| c23312.graph_c0 | 0.20642916    | 0.16071679    | 0.29474405    | 10.2021438     | 11.5897322     | 9.79396006     | 1.204E-76 | 4.47941  | up        | PREDICTED: probable inactive receptor kinase At5g67200 [Sesamum indicum]                                        |
| c23318.graph_c0 | 0.8798262     | 0.73392268    | 0.94217625    | 7.35370502     | 6.15856803     | 8.60950379     | 5.106E-06 | 2.02287  | up        | -                                                                                                               |
| c23327.graph_c0 | 8.5912281     | 5.29989579    | 5.26328835    | 0              | 0              | 0              | 2.5E-25   | -Inf     | down      | --                                                                                                              |
| c23334.graph_c0 | 2.84465406    | 3.25428863    | 2.93744981    | 15.4322478     | 13.300515      | 11.9298204     | 5.725E-08 | 1.0786   | up        | hypothetical protein MIMGU_mgv1a0115/4mg [Erythranthe guttata]                                                  |
| c23343.graph_c0 | 0.16433457    | 0.5263972     | 0.33788228    | 7.93064454     | 8.64883135     | 7.62136868     | 3.08E-33  | 3.4616   | up        | PREDICTED: probable dolichyl-diphosphooligosaccharide--protein glycosyltransferase subunit 3B [Sesamum indicum] |
| c23352.graph_c0 | 2.81004587    | 1.92458822    | 1.8055101     | 14.83373       | 14.4610626     | 16.972197      | 2.696E-12 | 1.73776  | up        | PREDICTED: phosphatidyl-N-methylethanolamine N-methyltransferase [Nicotiana sylvestris]                         |
| c23358.graph_c1 | 3.30421376    | 3.09181445    | 2.03071741    | 25.5288139     | 23.8985963     | 23.9836891     | 2.094E-23 | 2.03818  | up        | PREDICTED: polyadenylate-binding protein-interacting protein 12 [Sesamum indicum]                               |
| c23362.graph_c0 | 25.4398285    | 23.3779827    | 23.8484887    | 12.2758293     | 9.57869881     | 12.490304      | 5.029E-23 | -2.17025 | down      | -                                                                                                               |
| c23376.graph_c0 | 1.81058011    | 1.44251698    | 1.56693908    | 1.71875159     | 1.86709544     | 1.00803772     | 0.0001505 | -1.16108 | down      | 4-coumarate coenzyme A ligase [Paulownia fortunei]                                                              |
| c23392.graph_c0 | 0.32761525    | 0.24595748    | 0.31574892    | 1.48818046     | 3.4935873      | 3.15729206     | 0.0037152 | 2.10377  | up        | PREDICTED: uncharacterized protein LOC105168788 [Sesamum indicum]                                               |
| c23395.graph_c0 | 0.97939151    | 1.30716296    | 0.83903791    | 14.7504115     | 15.8533457     | 14.1336791     | 2.264E-28 | 2.75102  | up        | PREDICTED: uncharacterized protein LOC105176156 [Sesamum indicum]                                               |
| c23407.graph_c0 | 0.50227045    | 0.33518227    | 0.43029161    | 13.963058      | 14.9969573     | 15.9115211     | 2.306E-55 | 4.05643  | up        | PREDICTED: uncharacterized protein LOC105166016 [Sesamum indicum]                                               |
| c23417.graph_c0 | 3.62999824    | 3.04211146    | 4.23076667    | 0.30677463     | 0.33238647     | 0.45058606     | 1.976E-26 | -4.41421 | down      | -                                                                                                               |
| c23432.graph_c0 | 0             | 0             | 0             | 3.54462612     | 2.15415917     | 2.78114036     | 1.173E-11 | Inf      | up        | PREDICTED: beta-galactosidase-like [Sesamum indicum]                                                            |
| c23438.graph_c0 | 18.4933751    | 20.1188286    | 19.1438016    | 20.2546571     | 19.5943461     | 19.079136      | 1.204E-27 | -1.06194 | down      | PREDICTED: metal tolerance protein 1-like isoform X1 [Sesamum indicum]                                          |
| c23443.graph_c0 | 11.1443802    | 12.7330907    | 14.1763136    | 11.4540807     | 10.5635744     | 12.4841685     | 4.927E-09 | -1.23406 | down      | PREDICTED: LOW QUALITY PROTEIN: expansin-A11-like [Sesamum indicum]                                             |
| c23452.graph_c0 | 1.46810616    | 1.53637516    | 1.62931437    | 0.29100303     | 0.04379141     | 0.03957602     | 2.467E-21 | -4.7246  | down      | PREDICTED: uncharacterized protein LOC105168585 [Sesamum indicum]                                               |
| c23454.graph_c0 | 27.7416549    | 27.769434     | 28.5408402    | 28.0203579     | 27.1147385     | 26.3934511     | 5.825E-21 | -1.13508 | down      | hypothetical protein CICLE_v100253982mg, partial [Citrus clementina]                                            |



| #ID             | 0 h-1<br>FPKM | 0 h-2<br>FPKM | 0 h-3<br>FPKM | 28 h-1<br>FPKM | 28 h-2<br>FPKM | 28 h-3<br>FPKM | FDR       | log2FC   | regulated | nr_annotation                                                                                  |
|-----------------|---------------|---------------|---------------|----------------|----------------|----------------|-----------|----------|-----------|------------------------------------------------------------------------------------------------|
| c23455.graph_c0 | 10.5904054    | 11.5802199    | 9.23669179    | 3.5239486      | 4.77269278     | 5.34744575     | 6.398E-39 | -2.29034 | down      | anthocyanidin synthase [Ipomoea nil]                                                           |
| c23458.graph_c0 | 1.12058316    | 1.19906424    | 0.94344417    | 5.19552332     | 6.41535578     | 4.05617467     | 0.0002932 | 1.17345  | up        | PREDICTED: uncharacterized protein LOC105155953 [Sesamum indicum]                              |
| c23463.graph_c0 | 1.2423378     | 0.96277301    | 1.80244722    | 7.07775871     | 7.02171819     | 5.98929677     | 5.255E-07 | 1.22807  | up        | PREDICTED: uncharacterized protein LOC101217552 [Cucumis sativus]                              |
| c23471.graph_c0 | 0.33532534    | 0.67132223    | 0.43090633    | 2.35588772     | 4.1809416      | 3.11558971     | 0.0008975 | 1.65538  | up        | -                                                                                              |
| c23501.graph_c0 | 7.08762116    | 5.76445865    | 5.76357639    | 36.823333      | 36.9906901     | 35.8600138     | 1.563E-27 | 1.47017  | up        | PREDICTED: protein transport protein Sec24-like At4g32640 [Sesamum indicum]                    |
| c23505.graph_c0 | 26.2081291    | 13.6700179    | 19.6135229    | 0              | 0              | 0              | 1.365E-28 | -Inf     | down      | cytochrome c oxidase subunit 2 (mitochondrion) [Gelidium vagum]                                |
| c23509.graph_c0 | 7.52124197    | 4.56289294    | 8.64000801    | 33.7094378     | 34.2503673     | 34.1974269     | 2.337E-10 | 1.20744  | up        | -                                                                                              |
| c23513.graph_c0 | 532.834615    | 566.225916    | 524.298132    | 35.1363829     | 37.8273483     | 42.1116749     | 0         | -4.90785 | down      | PREDICTED: zinc finger protein ZAT10-like [Sesamum indicum]                                    |
| c23524.graph_c0 | 2.69133504    | 2.2001245     | 1.67159484    | 16.4307931     | 19.4568309     | 14.5246757     | 9.614E-14 | 1.85524  | up        | PREDICTED: uncharacterized protein LOC105161815 [Sesamum indicum]                              |
| c23535.graph_c0 | 1.10634827    | 0.9756161     | 1.08320102    | 6.08809145     | 6.93172101     | 5.88953775     | 1.532E-11 | 1.48753  | up        | PREDICTED: HIPL1 protein-like [Sesamum indicum]                                                |
| c23540.graph_c0 | 0.20905168    | 0.62778303    | 0.71637249    | 3.03875109     | 3.56681953     | 2.68622908     | 0.0004212 | 1.47835  | up        | -                                                                                              |
| c23541.graph_c0 | 0             | 0             | 0             | 10.0056518     | 8.85874477     | 7.37185733     | 5.417E-19 | Inf      | up        | PREDICTED: non-specific lipid transfer protein GPI-anchored 2-like [Nicotiana tomentosiformis] |
| c23552.graph_c0 | 0.57952362    | 0.29005196    | 0.49647386    | 3.43975449     | 4.43682256     | 4.4107039      | 7.574E-06 | 2.07943  | up        | PREDICTED: phosphoglycolate phosphatase 2 [Sesamum indicum]                                    |
| c23561.graph_c0 | 3.04000074    | 4.23852675    | 3.69724339    | 19.8850952     | 21.4098815     | 20.6528319     | 2.262E-29 | 1.40468  | up        | PREDICTED: leukotriene A-4 hydrolase homolog [Sesamum indicum]                                 |
| c23565.graph_c0 | 6.30206352    | 7.00930453    | 8.818259      | 4.68208796     | 2.94086013     | 4.48498825     | 1.248E-08 | -1.96366 | down      | PREDICTED: protein CUP-SHAPED COTYLEDON 3 [Sesamum indicum]                                    |
| c23578.graph_c0 | 0.45666827    | 0.71834016    | 0.8383383     | 3.17679416     | 4.45235994     | 4.68150461     | 7.792E-05 | 1.51597  | up        | -                                                                                              |
| c23583.graph_c0 | 0.68228463    | 0.63743665    | 0.64295936    | 9.98372815     | 12.2977504     | 9.63030036     | 1.338E-26 | 2.93236  | up        | PREDICTED: glyoxylate/succinic semialdehyde reductase 2, chloroplastic [Sesamum indicum]       |
| c23586.graph_c0 | 1.16998165    | 0.557692      | 0.7159394     | 4.98053895     | 4.27759581     | 4.19624429     | 0.0001525 | 1.37537  | up        | PREDICTED: glucan endo-1,3-beta-glucosidase 14-like [Sesamum indicum]                          |
| c23589.graph_c0 | 0.06590589    | 0             | 0             | 2.49080103     | 2.55170438     | 3.20505405     | 1.196E-13 | 5.9097   | up        | PREDICTED: calcium-dependent protein kinase 8-like [Sesamum indicum]                           |
| c23596.graph_c0 | 17.9611653    | 18.232775     | 16.6775121    | 12.2970171     | 12.617946      | 12.0878673     | 6.126E-59 | -1.60455 | down      | PREDICTED: probable 1-acyl-sn-glycerol-3-phosphate acyltransferase 4 [Sesamum indicum]         |
| c23601.graph_c0 | 6.45407707    | 5.56097101    | 6.61399883    | 31.4698303     | 34.4188388     | 34.497239      | 4.167E-16 | 1.33876  | up        | PREDICTED: uncharacterized protein LOC105163419 [Sesamum indicum]                              |
| c23609.graph_c0 | 2.20108011    | 1.81446931    | 2.49571332    | 15.7150177     | 15.7185611     | 11.8251031     | 3.004E-07 | 1.63779  | up        | PREDICTED: uncharacterized protein LOC105170698 [Sesamum indicum]                              |
| c23610.graph_c1 | 0             | 0             | 0             | 3.32254569     | 5.19221638     | 4.69240988     | 1.067E-12 | Inf      | up        | hypothetical protein MIMGU_mgv1a005845mg [Erythranthe outtata]                                 |

| #ID             | 0 h-1<br>FPKM | 0 h-2<br>FPKM | 0 h-3<br>FPKM | 28 h-1<br>FPKM | 28 h-2<br>FPKM | 28 h-3<br>FPKM | FDR       | log2FC   | regulated | nr_annotation                                                                                           |
|-----------------|---------------|---------------|---------------|----------------|----------------|----------------|-----------|----------|-----------|---------------------------------------------------------------------------------------------------------|
| c23625.graph_c0 | 0.20257345    | 0.4055526     | 0.26031491    | 2.72374055     | 3.4562887      | 2.82323925     | 5.276E-06 | 2.28215  | up        | -                                                                                                       |
| c23632.graph_c0 | 6.01974268    | 5.40455708    | 5.10390609    | 28.956942      | 25.3309051     | 27.7875612     | 1.331E-14 | 1.2236   | up        | -                                                                                                       |
| c23633.graph_c0 | 132.335231    | 131.755553    | 135.313385    | 20.3146182     | 22.2107314     | 23.3277444     | 0         | -3.69101 | down      | conserved hypothetical protein [Ricinus communis]                                                       |
| c23650.graph_c0 | 0.46338178    | 0.49476884    | 0.27788317    | 43.8267217     | 47.3356901     | 43.0356139     | 1.41E-253 | 5.67787  | up        | PREDICTED: glucan endo-1,5-beta-glucosidase 5 [Sesamum indicum]                                         |
| c23652.graph_c0 | 25.0259724    | 23.9043299    | 26.384268     | 19.7258085     | 21.5114502     | 20.1723833     | 2.108E-25 | -1.38605 | down      | PREDICTED: uncharacterized protein LOC105169025 [Sesamum indicum]                                       |
| c23673.graph_c0 | 0             | 0             | 0             | 4.39526919     | 7.33574166     | 5.86882434     | 1.033E-11 | Inf      | up        | PREDICTED: EPIDERMAL PATTERNING FACTOR-like protein 4-like [Fragaria vesca subsp. vesca]                |
| c23690.graph_c0 | 3.50055966    | 3.17034447    | 4.391254      | 20.3534927     | 19.9087369     | 21.3535078     | 4.371E-11 | 1.38393  | up        | PREDICTED: uncharacterized protein LOC105170479 [Sesamum indicum]                                       |
| c23691.graph_c0 | 1.30835682    | 2.73839451    | 1.68129031    | 10.1141841     | 8.81994933     | 10.087112      | 0.0004088 | 1.25047  | up        | -                                                                                                       |
| c23713.graph_c1 | 10.2787059    | 11.1869475    | 9.94243137    | 7.19884954     | 8.75645044     | 7.47021216     | 1.176E-29 | -1.51341 | down      | PREDICTED: uncharacterized protein LOC105162910 isoform X1 [Sesamum indicum]                            |
| c23716.graph_c0 | 0.29654297    | 0.29683991    | 0             | 20.9059948     | 14.4003643     | 15.6521832     | 6.425E-15 | 5.35367  | up        | hypothetical protein [Arachis diogoi]                                                                   |
| c23716.graph_c1 | 0.12336449    | 0.24697603    | 0             | 42.6784442     | 41.4490176     | 34.8252619     | 5.881E-69 | 7.25235  | up        | PREDICTED: abscisic acid receptor PYL4-like [Sesamum indicum]                                           |
| c23720.graph_c0 | 1.72191326    | 0.86181875    | 0.66381801    | 11.138142      | 7.90976243     | 12.0500976     | 1.764E-06 | 2.18108  | up        | unnamed protein product [Coffea canephora]                                                              |
| c23737.graph_c0 | 9.56463597    | 6.58227178    | 7.16971261    | 0              | 0              | 0              | 3.178E-40 | -Inf     | down      | hypothetical protein BOTBODRAFT_366584 [Botryobasidium botryosum FD-172 SS1]                            |
| c23783.graph_c0 | 0.05184724    | 0             | 0             | 0.64059872     | 0.83357731     | 0.52272332     | 2.706E-10 | 4.20665  | up        | PREDICTED: putative late blight resistance protein homolog R1A-10 [Sesamum indicum]                     |
| c23800.graph_c0 | 2.46207885    | 2.83422588    | 3.63844912    | 0.89471236     | 0.6462731      | 1.02210917     | 8.922E-12 | -2.89533 | down      | -                                                                                                       |
| c23802.graph_c0 | 0.32865828    | 0.14099459    | 0             | 68.1112036     | 75.1471429     | 69.3613533     | 0         | 7.75646  | up        | PREDICTED: nicotianamine synthase-like [Sesamum indicum]                                                |
| c23803.graph_c1 | 5.49089093    | 4.08877735    | 5.85132722    | 28.1299058     | 27.859438      | 30.935968      | 2.464E-18 | 1.40215  | up        | hypothetical protein MIMGU_mgv1a01592/mg [Erythranthe guttata]                                          |
| c23816.graph_c0 | 5.29489973    | 4.18436982    | 3.10365001    | 0.40508449     | 0.36575331     | 0.11018188     | 5.264E-20 | -4.92486 | down      | PREDICTED: elongation of fatty acids protein 5-like [Sesamum indicum]                                   |
| c23817.graph_c0 | 0.82907181    | 0.47422971    | 0.91319151    | 10.587921      | 11.7361374     | 8.00748707     | 6.542E-11 | 2.67938  | up        | hypothetical protein MIMGU_mgv1a0125/5mg [Erythranthe guttata]                                          |
| c23825.graph_c0 | 92.7354826    | 104.654642    | 96.7769624    | 30.7787651     | 33.5962189     | 33.3696503     | 8.63E-105 | -2.68019 | down      | PREDICTED: zinc finger A20 and AN1 domain-containing stress-associated protein 5-like [Sesamum indicum] |
| c23833.graph_c0 | 79.4240499    | 80.931372     | 75.1502342    | 71.0752567     | 68.9228709     | 67.8383401     | 4.121E-56 | -1.2702  | down      | PREDICTED: U3 small nucleolar RNA-associated protein 15 homolog [Sesamum indicum]                       |
| c23834.graph_c0 | 0.14383872    | 0             | 0             | 4.39072856     | 5.19149743     | 4.81971723     | 1.061E-16 | 5.58666  | up        | hypothetical protein MIMGU_mgv1a026155mg [Erythranthe guttata]                                          |
| c23837.graph_c0 | 0.46977167    | 0.70536311    | 1.60980051    | 5.23521923     | 5.65174275     | 5.89707402     | 4.259E-05 | 1.48554  | up        | -                                                                                                       |
| c23837.graph_c1 | 8.75419606    | 8.05879547    | 8.78866291    | 41.8107093     | 39.2899201     | 36.2726996     | 1.625E-24 | 1.10548  | up        | PREDICTED: protein FAR1-RELATED SEQUENCE 7-like [Sesamum indicum]                                       |
| c23840.graph_c0 | 0             | 0.04599782    | 0.05904989    | 6.91328391     | 7.4783947      | 6.458746       | 1.34E-33  | 6.52317  | up        | Integrase, catalytic region, putative [Theobroma cacao]                                                 |

| #ID             | 0 h-1<br>FPKM | 0 h-2<br>FPKM | 0 h-3<br>FPKM | 28 h-1<br>FPKM | 28 h-2<br>FPKM | 28 h-3<br>FPKM | FDR       | log2FC   | regulated | nr_annotation                                                                              |
|-----------------|---------------|---------------|---------------|----------------|----------------|----------------|-----------|----------|-----------|--------------------------------------------------------------------------------------------|
| c23846.graph_c0 | 18.973588     | 16.6566005    | 13.038402     | 1.84356877     | 1.79773533     | 2.16624537     | 5.061E-36 | -4.15218 | down      | PREDICTED: galactinol--sucrose galactosyltransferase [Sesamum indicum]                     |
| c23859.graph_c0 | 3.88167234    | 4.27411517    | 2.32778123    | 0              | 0.25472584     | 0              | 1.24E-17  | -6.45725 | down      | putative histone h2a protein [Eutypa lata UCREL1]                                          |
| c23876.graph_c0 | 5.41358174    | 7.90271215    | 5.79722239    | 2.78698        | 3.70056123     | 3.47811624     | 7.487E-08 | -2.02967 | down      | hypothetical protein, partial [Oryza eichingeri]                                           |
| c23879.graph_c0 | 2.26868941    | 2.4907316     | 1.50469972    | 1.38292355     | 1.00852525     | 1.08505224     | 9.844E-08 | -1.93497 | down      | -                                                                                          |
| c23891.graph_c0 | 56.3928194    | 51.347141     | 61.1788759    | 22.621106      | 21.2075675     | 18.0727429     | 1.353E-40 | -2.54107 | down      | -                                                                                          |
| c23894.graph_c0 | 0.90172026    | 0.77367702    | 0.6621407     | 7.02176879     | 6.84719877     | 7.33402367     | 2.454E-06 | 2.09459  | up        | PREDICTED: uncharacterized protein LOC105169824 isoform X1 [Sesamum indicum]               |
| c23905.graph_c0 | 3.30542899    | 6.47961363    | 4.24760712    | 44.2435874     | 46.455147      | 40.0230293     | 1.01E-23  | 2.12776  | up        | PREDICTED: macrophage migration inhibitory factor homolog [Sesamum indicum]                |
| c23936.graph_c0 | 0.36167337    | 0.24135702    | 0             | 43.021767      | 43.5914189     | 45.6155843     | 2.51E-76  | 6.70878  | up        | actin [Ipomoea nil]                                                                        |
| c23939.graph_c0 | 3.83367221    | 2.16902798    | 3.85545957    | 24.3497593     | 23.845024      | 24.6140895     | 5.117E-10 | 1.79271  | up        | hypothetical protein PHAVU_002G125300g [Phaseolus vulgaris]                                |
| c23951.graph_c0 | 14.6767768    | 12.9106888    | 14.7167019    | 5.09106667     | 5.58177498     | 5.37417316     | 8.317E-58 | -2.4895  | down      | PREDICTED: uncharacterized protein LOC105166244 [Sesamum indicum]                          |
| c23961.graph_c0 | 0.26908484    | 0.20201572    | 0.08644617    | 2.00458545     | 2.91358241     | 3.15176349     | 1.059E-07 | 2.77792  | up        | PREDICTED: N-alpha-acetyltransferase 10 [Sesamum indicum]                                  |
| c23962.graph_c0 | 37.7891168    | 37.0900681    | 40.0466553    | 16.0509228     | 11.4329551     | 13.0974219     | 2.565E-39 | -2.59313 | down      | PREDICTED: NAC transcription factor 25-like [Sesamum indicum]                              |
| c23973.graph_c0 | 0.15981051    | 0.07998527    | 0             | 9.23387382     | 11.7980976     | 8.00865027     | 1.431E-21 | 5.85211  | up        | PREDICTED: transcription factor MYB1R1-like [Malus domestica]                              |
| c23976.graph_c0 | 1.9675891     | 1.0743051     | 1.89632242    | 0              | 0              | 0              | 6.255E-19 | -Inf     | down      | predicted protein [Physcomitrella patens]                                                  |
| c23978.graph_c0 | 28.5261757    | 31.8144139    | 33.811724     | 31.2409947     | 29.2334232     | 28.3506349     | 1.438E-14 | -1.17677 | down      | PREDICTED: ran-binding protein 6 isoform X2 [Elaeis guineensis]                            |
| c23979.graph_c0 | 0.04907925    | 0.1965136     | 0.06306879    | 5.49325996     | 4.09030607     | 4.71531009     | 9.221E-19 | 4.44578  | up        | PREDICTED: ferredoxin--NADP reductase, leaf isozyme, chloroplastic isoform 1 [Glycine max] |
| c23985.graph_c0 | 0.35236662    | 1.32269797    | 0.45280505    | 4.86586249     | 4.68245825     | 5.79902567     | 4.939E-05 | 1.7631   | up        | hypothetical protein MUMGU_mgv1a016/98mg [Erythranthe montana]                             |
| c23986.graph_c0 | 0.78002256    | 0.39040182    | 1.33647983    | 9.16514038     | 10.663998      | 7.70997908     | 1.076E-08 | 2.35539  | up        | PREDICTED: uncharacterized protein LOC105178874 isoform X1 [Sesamum indicum]               |
| c23987.graph_c0 | 0.16019151    | 0.04008798    | 0.20585244    | 6.14148569     | 7.27969884     | 7.0539642      | 5.215E-31 | 4.5582   | up        | PREDICTED: lysophospholipid acyltransferase 1-like [Sesamum indicum]                       |
| c23990.graph_c0 | 0.50516519    | 1.01134208    | 0.32457864    | 9.36235433     | 8.12182509     | 6.89062383     | 6.682E-07 | 2.64164  | up        | PREDICTED: phosphoribosylformylglycinamide cyclo-ligase, chloroplastic [Sesamum indicum]   |
| c23994.graph_c0 | 31.4707959    | 29.7994816    | 31.2872942    | 30.5614515     | 32.0594199     | 32.8196568     | 4.289E-26 | -1.04619 | down      | PREDICTED: transmembrane and coiled-coil domain-containing protein 1 [Sesamum indicum]     |
| c23996.graph_c0 | 0.14539625    | 0.08732511    | 0.22420793    | 0.67630822     | 1.10679028     | 0.7933016      | 0.0023757 | 1.39573  | up        | Quinohemoprotein ethanol dehydrogenase type-1 [Theobroma cacao]                            |
| c24007.graph_c0 | 13.3183623    | 14.3071888    | 12.9701411    | 6.50935134     | 6.89749296     | 6.30233812     | 6.534E-91 | -2.13279 | down      | PREDICTED: uncharacterized protein LOC105164548 [Sesamum indicum]                          |

| #ID             | 0 h-1<br>FPKM | 0 h-2<br>FPKM | 0 h-3<br>FPKM | 28 h-1<br>FPKM | 28 h-2<br>FPKM | 28 h-3<br>FPKM | FDR       | log2FC   | regulated | nr_annotation                                                                         |
|-----------------|---------------|---------------|---------------|----------------|----------------|----------------|-----------|----------|-----------|---------------------------------------------------------------------------------------|
| c24031.graph_c0 | 8.38389819    | 9.41297773    | 12.0839488    | 2.71731315     | 4.38652307     | 3.02359819     | 6.342E-11 | -2.65736 | down      | hypothetical protein MIMGU_mgv1a025777mg, partial [Erythranthe guttata]               |
| c24032.graph_c0 | 0.69570898    | 0.19897304    | 0.38314868    | 1.9503152      | 2.21749481     | 1.94509489     | 0.0092746 | 1.17356  | up        | PREDICTED: coatomer subunit beta-1-like [Camelina sativa]                             |
| c24033.graph_c0 | 2.20737218    | 1.38741228    | 2.17689537    | 0              | 0              | 0              | 6.679E-26 | -Inf     | down      | CK1/CK1/CK1-D protein kinase [Coniosporium apollinis CBS 10007181]                    |
| c24064.graph_c0 | 30.9563711    | 29.2147867    | 30.2565219    | 7.43608112     | 8.90907306     | 7.46803873     | 4.97E-131 | -3.01601 | down      | PREDICTED: 21 kDa protein [Sesamum indicum]                                           |
| c24065.graph_c0 | 3.69052017    | 3.36584095    | 3.26703113    | 29.6239478     | 30.1381942     | 27.3100263     | 1.298E-45 | 1.98667  | up        | PREDICTED: zinc finger CCCH domain-containing protein 53 [Sesamum indicum]            |
| c24089.graph_c0 | 5.80369921    | 6.52878349    | 7.60004008    | 1.00430837     | 1.1969711      | 1.31121188     | 1.651E-28 | -3.59769 | down      | PREDICTED: ubiquitin-conjugating enzyme E2 5B-like isoform X1 [Citrus sinensis]       |
| c24100.graph_c0 | 2.07410805    | 1.64364642    | 2.55425634    | 0.12562081     | 0.17013573     | 0.15375834     | 5.83E-18  | -4.8968  | down      | hypothetical protein MIMGU_mgv1a025510mg [Erythranthe guttata]                        |
| c24101.graph_c0 | 0.970612      | 1.7272603     | 0.41575828    | 17.4791167     | 22.0806507     | 24.5601863     | 6.724E-17 | 3.28377  | up        | PREDICTED: methionine gamma-lyase [Sesamum indicum]                                   |
| c24101.graph_c1 | 0.44213769    | 1.32774128    | 0.75755258    | 6.85532002     | 6.18971123     | 9.35227675     | 1.671E-05 | 2.05702  | up        | PREDICTED: methionine gamma-lyase [Sesamum indicum]                                   |
| c24103.graph_c0 | 4.20368666    | 2.08311684    | 2.78117819    | 0              | 0              | 0              | 3.261E-19 | -Inf     | down      | isocitrate dehydrogenase [Lichtneimia corymbifera IMRC-FSI1-96821]                    |
| c24107.graph_c0 | 0.13476328    | 0.40469466    | 0             | 1.46917758     | 1.45918256     | 1.19883691     | 0.0023714 | 1.85865  | up        | -                                                                                     |
| c24109.graph_c0 | 3.2107792     | 2.99972803    | 3.64461425    | 42.4905264     | 44.5981703     | 44.4943116     | 1.65E-131 | 2.64651  | up        | PREDICTED: dihydroxy-acid dehydratase, chloroplastic [Sesamum indicum]                |
| c24123.graph_c0 | 0.08503434    | 0.08511948    | 0             | 2.90471584     | 3.29230803     | 3.02581839     | 1.241E-11 | 4.68974  | up        | PREDICTED: rasciclin-like arabinogalactan protein 1 [Sesamum indicum]                 |
| c24123.graph_c1 | 0             | 0.17250389    | 0             | 2.19186474     | 2.4879465      | 1.99294873     | 2.155E-10 | 4.19105  | up        | PREDICTED: rasciclin-like arabinogalactan protein 1 [Sesamum indicum]                 |
| c24136.graph_c0 | 1.70937318    | 2.50959112    | 2.92881628    | 2.23625263     | 1.71999661     | 2.56818621     | 0.0040936 | -1.22652 | down      | PREDICTED: uncharacterized protein LOC104116785 [Nicotiana tomentosiformis]           |
| c24143.graph_c0 | 10.6053634    | 12.1088557    | 10.3809407    | 8.40042515     | 9.46060613     | 11.031364      | 1.487E-20 | -1.28486 | down      | PREDICTED: phosphoglycerate mutase-like protein 1 isoform X1 [Sesamum indicum]        |
| c24146.graph_c0 | 0.07800556    | 0.23425102    | 0.10024023    | 1.98428974     | 7.9855401      | 3.46963762     | 0.0079044 | 3.93375  | up        | PREDICTED: glutamate decarboxylase [Sesamum indicum]                                  |
| c24157.graph_c0 | 19.1514645    | 21.5201521    | 21.0696413    | 17.5040412     | 17.3671007     | 17.6522039     | 1.673E-32 | -1.32467 | down      | PREDICTED: plant intracellular Ras-group-related LRR protein 1-like [Sesamum indicum] |
| c24158.graph_c0 | 0.26580064    | 0.15964008    | 0.20493861    | 1.27500367     | 1.08143854     | 1.60787944     | 0.000715  | 1.56632  | up        | -                                                                                     |
| c24171.graph_c0 | 2.21557016    | 1.26730784    | 1.76248761    | 6.59441292     | 9.20814145     | 10.1988476     | 0.0006386 | 1.22179  | up        | exocyst subunit Exo/U-interacting protein Koh1 [Nicotiana glauca]                     |
| c24187.graph_c0 | 4.73589486    | 5.64980043    | 4.33509924    | 25.8858846     | 27.8001093     | 27.4710141     | 2.045E-16 | 1.374    | up        | PREDICTED: probable methyltransferase PM111 [Sesamum indicum]                         |
| c24197.graph_c0 | 0.61769397    | 0.53587083    | 0.3704219     | 21.848239      | 21.1050928     | 20.0747991     | 1.836E-80 | 4.28529  | up        | PREDICTED: very-long-chain enoyl-CoA reductase [Sesamum indicum]                      |
| c24237.graph_c1 | 0.18130731    | 0.36297771    | 0             | 1.97659657     | 1.62604304     | 1.61288666     | 2.503E-05 | 2.18592  | up        | hypothetical protein MIMGU_mgv1a021552mg [Erythranthe guttata]                        |
| c24238.graph_c0 | 1080.13099    | 1042.58625    | 1033.19528    | 91.5596853     | 81.6058497     | 95.192839      | 0         | -4.64532 | down      | -                                                                                     |
| c24240.graph_c0 | 10.0380567    | 4.77285144    | 8.70702768    | 34.1069382     | 40.6762339     | 38.993142      | 5.897E-06 | 1.18415  | up        | PREDICTED: nudix hydrolase 26, chloroplastic isoform X2 [Vitis vinifera]              |

| #ID             | 0 h-1<br>FPKM | 0 h-2<br>FPKM | 0 h-3<br>FPKM | 28 h-1<br>FPKM | 28 h-2<br>FPKM | 28 h-3<br>FPKM | FDR       | log2FC   | regulated | nr_annotation                                                                        |
|-----------------|---------------|---------------|---------------|----------------|----------------|----------------|-----------|----------|-----------|--------------------------------------------------------------------------------------|
| c24241.graph_c0 | 5.79789672    | 6.33942882    | 7.22127985    | 72.9973314     | 78.9043852     | 76.4931769     | 2.72E-73  | 2.46719  | up        | PREDICTED: 14 kDa zinc-binding protein-like [Sesamum indicum]                        |
| c24247.graph_c0 | 0.14473161    | 0.36219135    | 0.27897878    | 6.83735659     | 5.50865434     | 6.09423272     | 4.895E-14 | 3.45754  | up        | PREDICTED: cytochrome P450 71D11-like [Sesamum indicum]                              |
| c24250.graph_c0 | 0.5241299     | 0.07495068    | 0.19243648    | 1.74141526     | 2.11282476     | 2.35349917     | 9.389E-05 | 1.89351  | up        | hypothetical protein MIMGU_mgv1a016982mg [Erythranthe<br>outfata]                    |
| c24255.graph_c0 | 50.4433572    | 51.7964418    | 48.0342978    | 16.8752486     | 18.3008645     | 18.8695287     | 8.83E-202 | -2.5649  | down      | PREDICTED: uncharacterized protein LOC105164653 isoform X2 [Sesamum indicum]         |
| c24261.graph_c0 | 0.4936893     | 0.14119533    | 0.54378026    | 3.79314001     | 4.07279434     | 3.97353069     | 3.446E-07 | 2.23346  | up        | -                                                                                    |
| c24269.graph_c0 | 6.36450519    | 7.77156782    | 5.16240469    | 30.6082606     | 30.5096262     | 29.5804718     | 2.313E-18 | 1.14504  | up        | unknown [Glycine max]                                                                |
| c24270.graph_c0 | 7.26712524    | 6.96703306    | 9.60160122    | 112.998725     | 105.116954     | 113.451668     | 2.38E-100 | 2.70377  | up        | PREDICTED: peptidyl-prolyl cis-trans isomerase FKBP12 [Sesamum indicum]              |
| c24272.graph_c0 | 2.34945165    | 1.50515473    | 2.17377964    | 0.06830272     | 0.03083547     | 0.05573446     | 2.352E-26 | -6.37201 | down      | PREDICTED: acyl-[acyl-carrier-protein] desaturase 6, chloroplastic [Sesamum indicum] |
| c24284.graph_c0 | 0             | 0.07344123    | 0             | 1.27975839     | 1.68510685     | 2.13205615     | 9.007E-10 | 5.03685  | up        | -                                                                                    |
| c24286.graph_c0 | 1.26591511    | 0             | 0.29577291    | 4.76758262     | 7.55207035     | 6.8251026      | 4.083E-05 | 2.54321  | up        | PREDICTED: topless-related protein 3-like [Sesamum indicum]                          |
| c24289.graph_c0 | 6.27219362    | 6.27847428    | 5.09053714    | 43.4266077     | 42.2429848     | 41.3090872     | 1.555E-08 | 1.75956  | up        | hypothetical protein MIMGU_mgv1a018519mg [Erythranthe<br>outfata]                    |
| c24292.graph_c0 | 53.7044584    | 57.0568334    | 57.5675202    | 29.1931558     | 33.6058592     | 25.9869565     | 6.277E-80 | -2.01519 | down      | hypothetical protein MIMGU_mgv1a016421mg [Erythranthe<br>outfata]                    |
| c24300.graph_c0 | 5.5979338     | 2.66168116    | 2.69758746    | 0              | 0              | 0              | 1.796E-10 | -Inf     | down      | --                                                                                   |
| c24304.graph_c0 | 0             | 0             | 0             | 3.44398214     | 3.3583604      | 3.82195537     | 1.688E-09 | Inf      | up        | -                                                                                    |
| c24309.graph_c0 | 1.10159605    | 1.55898842    | 0.97627209    | 8.94501052     | 16.6764889     | 10.4529684     | 9.818E-05 | 2.22064  | up        | PREDICTED: chitotriosidase-1 [Vitis vinifera]                                        |
| c24314.graph_c0 | 5.92516869    | 4.48449164    | 6.03554833    | 2.94094138     | 3.12957189     | 3.12829006     | 3.45E-13  | -1.92965 | down      | hypothetical protein MIMGU_mgv1a013918mg [Erythranthe<br>outfata]                    |
| c24323.graph_c0 | 4.45600816    | 3.95866728    | 3.57884181    | 182.049861     | 160.682213     | 185.647708     | 1.04E-134 | 4.37377  | up        | PREDICTED: alpha-xylosidase 1 [Sesamum indicum]                                      |
| c24336.graph_c0 | 4.4781711     | 1.73193501    | 3.13888754    | 35.8017984     | 54.966992      | 38.7507687     | 3.171E-10 | 2.70368  | up        | PREDICTED: hydroxymethylglutaryl-CoA synthase isoform X4 [Sesamum indicum]           |
| c24341.graph_c0 | 0.78328947    | 0.52271588    | 0.33551933    | 3.13109649     | 3.25543301     | 2.47752646     | 0.0044535 | 1.35076  | up        | PREDICTED: methylsteroid monooxygenase 1-1-like [Sesamum<br>indicum]                 |
| c24348.graph_c0 | 0.42416922    | 0.08491879    | 0.2180297     | 3.69940492     | 3.06186448     | 3.42117543     | 1.296E-07 | 2.7247   | up        | hypothetical protein MIMGU_mgv1a01112/mg [Erythranthe<br>outfata]                    |
| c24351.graph_c0 | 35.2569645    | 30.0166206    | 30.5936288    | 164.710436     | 160.047846     | 164.149808     | 1.137E-27 | 1.26145  | up        | 40S ribosomal protein S13, putative [Ricinus communis]                               |
| c24361.graph_c0 | 1.44073375    | 1.44217643    | 1.38854993    | 8.46419564     | 5.12117917     | 7.40513722     | 0.0022115 | 1.20773  | up        | unnamed protein product [Coffea canephora]                                           |
| c24366.graph_c0 | 1.04162414    | 0.80205167    | 0.72074599    | 8.44397933     | 7.99218268     | 8.22074307     | 1.798E-09 | 2.17899  | up        | PREDICTED: chaperone protein dnaJ 20, chloroplastic-like [Sesamum indicum]           |
| c24372.graph_c0 | 0             | 0             | 0             | 1.80014994     | 3.02654473     | 2.88716331     | 1.405E-10 | Inf      | up        | early dehydration-responsive 1 [Lindernia subracemosa]                               |
| c24393.graph_c0 | 1.01263412    | 0.25341203    | 1.4639343     | 4.78384817     | 5.98066113     | 5.63016496     | 0.0003268 | 1.48666  | up        | PREDICTED: serine/threonine-protein kinase S1E20 [Sesamum<br>indicum]                |
| c24395.graph_c0 | 0.68860663    | 0.34464808    | 0.70790943    | 8.25784298     | 8.76651664     | 8.29019082     | 9.956E-15 | 2.76892  | up        | PREDICTED: uncharacterized protein LOC104250007 [Nicotiana<br>sylvestris]            |

| #ID             | 0 h-1<br>FPKM | 0 h-2<br>FPKM | 0 h-3<br>FPKM | 28 h-1<br>FPKM | 28 h-2<br>FPKM | 28 h-3<br>FPKM | FDR       | log2FC   | regulated | nr_annotation                                                                                                 |
|-----------------|---------------|---------------|---------------|----------------|----------------|----------------|-----------|----------|-----------|---------------------------------------------------------------------------------------------------------------|
| c24403.graph_c0 | 4.7488648     | 6.90041623    | 7.67731265    | 3.34011055     | 3.31738733     | 3.54315381     | 2.485E-06 | -2.01726 | down      | -                                                                                                             |
| c24417.graph_c0 | 10.0718919    | 11.2126664    | 12.0355756    | 2.2234231      | 1.82223097     | 1.73055839     | 3.043E-58 | -3.62135 | down      | PREDICTED: transcription factor TGA3 [Sesamum indicum]                                                        |
| c24436.graph_c0 | 1.6114729     | 1.36104178    | 1.16482865    | 5.45344293     | 7.30330491     | 5.82377956     | 0.0002221 | 1.07957  | up        | PREDICTED: myb family transcription factor APL isoform X4 [Sesamum indicum]                                   |
| c24438.graph_c0 | 0.02838536    | 0.22731027    | 0.10942894    | 1.21718866     | 1.24802517     | 1.29623106     | 1.831E-06 | 2.27041  | up        | PREDICTED: ornithine decarboxylase-like [Sesamum indicum]                                                     |
| c24441.graph_c0 | 0.61013615    | 0.34899835    | 0.50403157    | 15.5838694     | 16.9878844     | 16.2830801     | 1.131E-56 | 3.97204  | up        | PREDICTED: cysteine-rich repeat secretory protein 3-like [Sesamum indicum]                                    |
| c24454.graph_c0 | 2.74780725    | 3.83411221    | 3.31703861    | 1.39191154     | 1.6392595      | 0.98764213     | 1.058E-11 | -2.39446 | down      | hypothetical protein TRIUR3_08605 [Triticum urartu]                                                           |
| c24465.graph_c0 | 2528.85708    | 2899.14667    | 2538.28124    | 86.4538622     | 118.468905     | 118.242721     | 4.53E-244 | -5.71331 | down      | legumin-like protein [Perilla frutescens]                                                                     |
| c24469.graph_c0 | 19.9370719    | 21.8370465    | 21.7212422    | 20.3702094     | 21.1417669     | 18.0784849     | 3.911E-11 | -1.18367 | down      | PREDICTED: uncharacterized protein LOC105159964 [Sesamum indicum]                                             |
| c24473.graph_c0 | 31.584226     | 33.5155178    | 27.8708881    | 25.0734202     | 26.4195184     | 26.5292849     | 6.995E-36 | -1.34155 | down      | PREDICTED: uncharacterized protein LOC105159991 [Sesamum indicum]                                             |
| c24478.graph_c0 | 0.39788268    | 0             | 0.17043166    | 2.31343068     | 3.56838546     | 2.51698739     | 1.049E-06 | 2.80365  | up        | PREDICTED: indole-3-acetic acid-amido synthetase GH3.6 [Sesamum indicum]                                      |
| c24482.graph_c0 | 5.9714425     | 5.51365649    | 4.5975089     | 37.1332751     | 40.1996578     | 40.2683049     | 6.648E-68 | 1.78309  | up        | PREDICTED: probable methylenetetrahydrofolate reductase [Sesamum indicum]                                     |
| c24492.graph_c0 | 1.5829336     | 1.70640472    | 2.03413235    | 79.2052292     | 73.8321382     | 72.5020598     | 9.75E-99  | 4.31093  | up        | hypothetical protein MIMGU_mgv1a01 / 195mg [Erythranthe ontifata]                                             |
| c24494.graph_c0 | 23.9298511    | 24.1255251    | 20.2801015    | 25.059553      | 20.6001797     | 21.9235233     | 1.428E-17 | -1.10436 | down      | -                                                                                                             |
| c24500.graph_c0 | 4.54786624    | 5.31115695    | 5.45457563    | 5.50893829     | 4.37716819     | 5.84382326     | 0.0024521 | -1.05277 | down      | -                                                                                                             |
| c24502.graph_c0 | 23.3114681    | 20.8785151    | 23.0189436    | 9.27386648     | 7.4072667      | 9.89582987     | 1.122E-21 | -2.42814 | down      | -                                                                                                             |
| c24503.graph_c0 | 57.9925772    | 59.6072111    | 49.0745289    | 23.9994798     | 32.533933      | 27.1237943     | 7.454E-47 | -2.08326 | down      | PREDICTED: uncharacterized protein LOC105178379 [Sesamum indicum]                                             |
| c24520.graph_c0 | 2.36183844    | 1.35097341    | 1.30073824    | 83.621509      | 83.694723      | 94.247609      | 6.707E-87 | 4.62195  | up        | -                                                                                                             |
| c24523.graph_c0 | 66.3616252    | 66.1381381    | 67.5766896    | 43.9975631     | 47.8144214     | 43.8416242     | 1.247E-89 | -1.65172 | down      | PREDICTED: anthocyanidin 3-O-glucoside 6'&apos;&apos;-O-acyltransferase-like [Sesamum indicum]                |
| c24539.graph_c0 | 0.13595458    | 0.20413607    | 0.08735351    | 2.37146408     | 2.05199264     | 2.13666775     | 1.371E-07 | 2.85533  | up        | PREDICTED: BTB/POZ domain-containing protein At1g30440-like [Camelina sativa]                                 |
| c24542.graph_c0 | 21.4777708    | 20.8615871    | 22.1032183    | 2.38117424     | 1.79164757     | 2.21288245     | 9.41E-118 | -4.42558 | down      | -                                                                                                             |
| c24558.graph_c0 | 3.52549709    | 2.48636017    | 3.50076622    | 1.39762416     | 1.31450373     | 1.90074984     | 1.351E-09 | -2.13384 | down      | PREDICTED: uncharacterized protein LOC105160970 [Sesamum indicum]                                             |
| c24559.graph_c0 | 153.220404    | 156.896774    | 146.418925    | 65.2719527     | 71.1420099     | 71.0772935     | 2.15E-160 | -2.22744 | down      | PREDICTED: uncharacterized protein LOC105168445 [Sesamum indicum]                                             |
| c24566.graph_c0 | 0.54732374    | 0.44825875    | 0.51151467    | 5.49675859     | 6.95481103     | 6.2853359      | 1.681E-13 | 2.5457   | up        | PREDICTED: 2-C-methyl-D-erythritol 4-phosphate cytidyltransferase, chloroplastic isoform X2 [Sesamum indicum] |

| #ID             | 0 h-1<br>FPKM | 0 h-2<br>FPKM | 0 h-3<br>FPKM | 28 h-1<br>FPKM | 28 h-2<br>FPKM | 28 h-3<br>FPKM | FDR       | log2FC   | regulated | nr_annotation                                                                                         |
|-----------------|---------------|---------------|---------------|----------------|----------------|----------------|-----------|----------|-----------|-------------------------------------------------------------------------------------------------------|
| c24579.graph_c0 | 1.22482873    | 0.11145956    | 0.71543337    | 5.50304503     | 3.72655027     | 5.34890624     | 0.0011079 | 1.74462  | up        | unnamed protein product [Vitis vinifera]                                                              |
| c24593.graph_c0 | 198.631914    | 203.43666     | 202.034914    | 104.440484     | 113.763849     | 105.961476     | 5.26E-130 | -1.98899 | down      | hypothetical protein MIMGU_mgv1a025555mg [Erythranthe<br>outfata]                                     |
| c24594.graph_c0 | 0.85792605    | 0.99090592    | 0.63603977    | 15.8282141     | 18.2106997     | 17.671017      | 4.9E-64   | 3.29277  | up        | PREDICTED: uncharacterized protein LOC105165456 [Sesamum<br>indicum]                                  |
| c24616.graph_c0 | 1.40760658    | 1.6103041     | 1.35662264    | 0.94996604     | 2.07834641     | 1.01367669     | 0.0007458 | -1.20628 | down      | PREDICTED: uncharacterized protein LOC105170552 [Sesamum<br>indicum]                                  |
| c24619.graph_c0 | 8.17252621    | 7.95080691    | 6.960355      | 4.42351029     | 4.9987987      | 5.17595601     | 1.29E-50  | -1.74925 | down      | PREDICTED: ribonucleoside-diphosphate reductase large subunit<br>isoform X2 [Sesamum indicum]         |
| c24628.graph_c0 | 0.15081109    | 0             | 0             | 4.49395383     | 6.8286758      | 5.45582456     | 5.433E-13 | 5.73828  | up        | hypothetical protein MIMGU_mgv1a00944/mg [Erythranthe<br>outfata]                                     |
| c24648.graph_c0 | 1.54106536    | 1.69686936    | 1.2872145     | 56.7298955     | 69.7283613     | 60.5943142     | 1.57E-72  | 4.28095  | up        | PREDICTED: protein YLS3-like [Sesamum indicum]                                                        |
| c24651.graph_c0 | 12.8744382    | 8.25928335    | 8.22637932    | 0              | 0              | 0              | 2.613E-35 | -Inf     | down      | uncharacterized protein LOC100274375 precursor [Zea mays]                                             |
| c24658.graph_c0 | 0             | 0.10074915    | 0             | 4.4621896      | 3.03821617     | 3.10389728     | 1.498E-12 | 5.63556  | up        | PREDICTED: protein LURP-one-related 11-like [Sesamum<br>indicum]                                      |
| c24676.graph_c0 | 0.59102025    | 0.50287026    | 0.49366487    | 3.75856348     | 3.87843477     | 3.36489008     | 4.835E-08 | 1.70367  | up        | PREDICTED: LOW QUALITY PROTEIN: uncharacterized protein<br>LOC105175967 [Sesamum indicum]             |
| c24677.graph_c0 | 19.7965123    | 19.5670735    | 17.1728622    | 16.3486188     | 18.2745611     | 16.6385045     | 8.083E-31 | -1.23031 | down      | PREDICTED: probable inactive receptor kinase At1g27190<br>[Sesamum indicum]                           |
| c24678.graph_c0 | 9.63993462    | 11.4847852    | 10.6397403    | 9.62821938     | 11.7205383     | 11.4691577     | 9.065E-11 | -1.04405 | down      | PREDICTED: vacuolar protein sorting-associated protein 2<br>homolog 3 [Beta vulgaris subsp. vulgaris] |
| c24685.graph_c0 | 11.3973257    | 11.1434189    | 9.48017232    | 6.13236638     | 8.5228474      | 6.07810956     | 3.564E-32 | -1.71646 | down      | PREDICTED: LOW QUALITY PROTEIN: U-box domain-<br>containing protein 28-like [Sesamum indicum]         |
| c24693.graph_c1 | 4.53925679    | 5.76287104    | 7.96719469    | 3.86236761     | 4.64980777     | 5.05578861     | 0.0026655 | -1.526   | down      | PREDICTED: mitoferrin-like [Sesamum indicum]                                                          |
| c24702.graph_c0 | 1.24265803    | 1.1978319     | 0.65057453    | 16.457522      | 15.3730407     | 13.3746133     | 1.516E-33 | 2.7866   | up        | PREDICTED: mitogen-activated protein kinase kinase kinase 2<br>[Sesamum indicum]                      |
| c24737.graph_c0 | 3.63095419    | 3.98074147    | 3.61053325    | 18.5355284     | 18.6363554     | 16.2271586     | 8.887E-13 | 1.15961  | up        | hypothetical protein MIMGU_mgv1a010118mg [Erythranthe<br>outfata]                                     |
| c24739.graph_c0 | 0.9279034     | 0.82562893    | 1.14822991    | 21.5306797     | 20.6805681     | 19.1382349     | 1.917E-74 | 3.30772  | up        | PREDICTED: homeobox-leucine zipper protein ATHB-6-like<br>[Sesamum indicum]                           |
| c24741.graph_c0 | 3.03223027    | 2.49737124    | 2.71277819    | 13.9481486     | 13.6517556     | 13.9424298     | 3.859E-23 | 1.24395  | up        | PREDICTED: uncharacterized protein LOC105162811 [Sesamum<br>indicum]                                  |
| c24752.graph_c0 | 5.66846869    | 6.35504219    | 5.19606744    | 87.0927914     | 96.4668782     | 83.6622944     | 4.4E-113  | 2.86629  | up        | hypothetical protein MIMGU_mgv1a006115mg [Erythranthe<br>outfata]                                     |
| c24769.graph_c0 | 4.51302474    | 4.35903354    | 4.78197416    | 49.4307838     | 65.7780045     | 50.7123693     | 6.277E-20 | 2.51079  | up        | PREDICTED: inorganic phosphate transporter 1-4-like [Sesamum<br>indicum]                              |
| c24790.graph_c0 | 89.7149166    | 82.5351042    | 77.5364442    | 66.0376927     | 68.4048905     | 66.677718      | 1.078E-64 | -1.40155 | down      | PREDICTED: cell number regulator 8-like [Sesamum indicum]                                             |
| c24791.graph_c0 | 12.9341724    | 13.8588934    | 9.71504693    | 166.494452     | 152.958888     | 141.206007     | 1.355E-69 | 2.57013  | up        | unnamed protein product [Coffea canephora]                                                            |
| c24796.graph_c0 | 0.15451505    | 0.30933955    | 0.39711592    | 3.6497711      | 4.05587829     | 2.52000135     | 3.02E-07  | 2.46785  | up        | hypothetical protein L484_021121 [Morus notabilis]                                                    |

| #ID             | 0 h-1<br>FPKM | 0 h-2<br>FPKM | 0 h-3<br>FPKM | 28 h-1<br>FPKM | 28 h-2<br>FPKM | 28 h-3<br>FPKM | FDR       | log2FC   | regulated | nr_annotation                                                                         |
|-----------------|---------------|---------------|---------------|----------------|----------------|----------------|-----------|----------|-----------|---------------------------------------------------------------------------------------|
| c24800.graph_c0 | 0             | 0             | 0             | 2.8675005      | 2.36502874     | 2.49734736     | 1.71E-19  | Inf      | up        | PREDICTED: uncharacterized protein LOC105163689 [Sesamum indicum]                     |
| c24813.graph_c0 | 4.26672518    | 4.14538009    | 3.22524164    | 24.8082502     | 21.6583632     | 22.4016257     | 5.626E-16 | 1.47798  | up        | PREDICTED: polyadenylate-binding protein-interacting protein 6-like [Sesamum indicum] |
| c24821.graph_c0 | 0.32283847    | 0.21544116    | 0.41486022    | 2.42458377     | 3.46030384     | 2.36136454     | 2.238E-05 | 2.0162   | up        | PREDICTED: protein RADIALIS-like 4 [Sesamum indicum]                                  |
| c24843.graph_c0 | 630.067796    | 663.918723    | 606.604714    | 77.3075587     | 82.1836523     | 78.5512226     | 0         | -4.08718 | down      | PREDICTED: zinc finger CCCH domain-containing protein 29 [Sesamum indicum]            |
| c24844.graph_c0 | 3.40973176    | 2.99090122    | 2.93615072    | 14.8434922     | 14.2557833     | 15.2600814     | 5.135E-13 | 1.1596   | up        | PREDICTED: protein trichome birefringence-like 55 [Sesamum indicum]                   |
| c24858.graph_c0 | 2.87378081    | 2.20886275    | 4.08859235    | 17.0821514     | 15.0531457     | 13.9084618     | 1.972E-07 | 1.23076  | up        | PREDICTED: uncharacterized protein LOC105174534 [Sesamum indicum]                     |
| c24859.graph_c0 | 4.36843102    | 2.55553559    | 4.15552712    | 29.0693519     | 30.565538      | 27.6232772     | 3.079E-32 | 1.88576  | up        | PREDICTED: O-acetyl-ADP-ribose deacetylase MACROD2 isoform X1 [Sesamum indicum]       |
| c24860.graph_c0 | 13.7655464    | 8.03794282    | 6.63347706    | 0              | 0              | 0              | 1.986E-16 | -Inf     | down      | 40S ribosomal protein S26E [Uncinocarpus reesii 1704]                                 |
| c24873.graph_c0 | 3.37351285    | 3.14400189    | 3.88663921    | 17.0784013     | 16.1072336     | 16.2469772     | 1.339E-09 | 1.15553  | up        | PREDICTED: plastid division protein PDV2-like [Sesamum indicum]                       |
| c24876.graph_c0 | 2.36562097    | 2.03564034    | 3.25324409    | 0.0301635      | 0.02723482     | 0.04922634     | 1.137E-21 | -7.25843 | down      | retrotransposon protein, putative, unclassified [Oryza sativa Japonica Group]         |
| c24896.graph_c0 | 145.115897    | 143.656112    | 147.741354    | 144.627096     | 165.414311     | 149.301218     | 2.799E-30 | -1.01758 | down      | PREDICTED: thiamine thiazole synthase 2, chloroplastic-like [Sesamum indicum]         |
| c24896.graph_c1 | 145.213955    | 147.057819    | 142.906883    | 136.113546     | 166.137001     | 141.38156      | 2.733E-39 | -1.06304 | down      | PREDICTED: thiamine thiazole synthase 2, chloroplastic [Vitis vinifera]               |
| c24901.graph_c0 | 22.4095756    | 20.8578389    | 29.0497989    | 119.439103     | 118.936138     | 130.686787     | 1.279E-17 | 1.25748  | up        | PREDICTED: 40S ribosomal protein S24-1-like [Elaeis guineensis]                       |
| c24909.graph_c0 | 5.19017097    | 5.70534292    | 5.68755184    | 33.8339659     | 33.9548295     | 33.4811281     | 1.463E-42 | 1.51888  | up        | PREDICTED: DEAD-box ATP-dependent RNA helicase 31-like [Sesamum indicum]              |
| c24911.graph_c0 | 0             | 0             | 0.50715       | 2.75361125     | 4.8689117      | 3.18314275     | 7.653E-06 | 3.28169  | up        | PREDICTED: auxin-induced protein 10A5-like [Sesamum indicum]                          |
| c24920.graph_c0 | 873.207101    | 776.991163    | 836.622975    | 33.1507516     | 31.3405862     | 36.8367465     | 0         | -5.7068  | down      | -                                                                                     |
| c24925.graph_c0 | 6.92784282    | 7.23305011    | 6.22221398    | 4.71027002     | 5.47503915     | 3.9760778      | 3.261E-12 | -1.61572 | down      | PREDICTED: protein MKS1 [Sesamum indicum]                                             |
| c24930.graph_c0 | 1.87441894    | 1.96782251    | 1.76246528    | 10.4998082     | 10.80039       | 11.4146392     | 4.559E-11 | 1.45595  | up        | PREDICTED: potassium transporter 8-like [Sesamum indicum]                             |
| c24941.graph_c0 | 1.32199744    | 1.62039333    | 1.38679106    | 0.84316867     | 1.15080574     | 0.9760266      | 3.668E-08 | -1.63455 | down      | PREDICTED: scarecrow-like protein 14 [Sesamum indicum]                                |
| c24946.graph_c0 | 2.01775041    | 1.6831424     | 1.23470913    | 13.1285715     | 15.3848089     | 13.0206193     | 1.69E-19  | 1.98765  | up        | hypothetical protein MIMGU_mgv1a010695mg [Erythranthe guiffarta]                      |
| c24966.graph_c0 | 14.1134348    | 12.9624071    | 11.779261     | 2.53795375     | 3.62826261     | 3.53787212     | 1.3E-30   | -3.08947 | down      | hypothetical protein MIMGU_mgv1a019945mg [Erythranthe guiffarta]                      |
| c24971.graph_c0 | 5.89281907    | 7.23657382    | 7.3383046     | 0.97137188     | 1.51491791     | 1.33306211     | 1.366E-37 | -3.5148  | down      | PREDICTED: zinc transporter 8-like [Sesamum indicum]                                  |
| c24986.graph_c0 | 0.12156351    | 0             | 0             | 3.97582451     | 5.26503526     | 4.54193647     | 4.649E-13 | 5.76579  | up        | -                                                                                     |
| c24998.graph_c0 | 20.2942048    | 20.4249314    | 17.4331488    | 4.48904251     | 5.28361551     | 4.18631089     | 6.256E-59 | -3.14807 | down      | PREDICTED: uncharacterized protein LOC105177785 [Sesamum indicum]                     |



| #ID             | 0 h-1<br>FPKM | 0 h-2<br>FPKM | 0 h-3<br>FPKM | 28 h-1<br>FPKM | 28 h-2<br>FPKM | 28 h-3<br>FPKM | FDR       | log2FC   | regulated | nr_annotation                                                                                                 |
|-----------------|---------------|---------------|---------------|----------------|----------------|----------------|-----------|----------|-----------|---------------------------------------------------------------------------------------------------------------|
| c24998.graph_c1 | 14.3980554    | 14.0898056    | 16.2928687    | 3.27989399     | 3.73705114     | 2.86753576     | 1.5E-48   | -3.27301 | down      | PREDICTED: uncharacterized protein LOC105177785 [Sesamum indicum]                                             |
| c24999.graph_c0 | 22.369013     | 21.9608081    | 22.9407748    | 2.97015119     | 3.81093354     | 4.27322318     | 1.372E-83 | -3.69537 | down      | hypothetical protein MIMGU_mgv1a011964mg [Erythranthe guttata]                                                |
| c25013.graph_c0 | 12.5422114    | 15.5491554    | 10.7448254    | 6.46998538     | 7.99402867     | 7.7375012      | 2.055E-11 | -1.8946  | down      | PREDICTED: probable LRR receptor-like serine/threonine-protein kinase RLK [Sesamum indicum]                   |
| c25019.graph_c0 | 1.00467236    | 1.08017308    | 1.91265742    | 14.6038016     | 15.9939642     | 13.9247478     | 1.668E-35 | 2.37735  | up        | PREDICTED: 4-diphosphocytidyl-2-C-methyl-D-erythritol kinase, chloroplastic [Sesamum indicum]                 |
| c25027.graph_c0 | 1.76575889    | 3.41721892    | 2.77330788    | 12.5767652     | 12.3083805     | 12.2405778     | 2.294E-08 | 1.1284   | up        | PREDICTED: putative methyltransferase C9orf114 [Neiumbo nucifera]                                             |
| c25041.graph_c0 | 3.58343813    | 4.52481108    | 3.03980946    | 3.04700373     | 3.12002912     | 3.37529737     | 1.115E-06 | -1.3118  | down      | PREDICTED: TATA box-binding protein-associated factor RNA polymerase I subunit B isoform X1 [Sesamum indicum] |
| c25044.graph_c0 | 28.3636885    | 27.3958768    | 27.3541094    | 20.2729985     | 23.0939318     | 22.6415582     | 4.411E-58 | -1.42251 | down      | PREDICTED: zinc finger Ran-binding domain-containing protein 2-like isoform X1 [Sesamum indicum]              |
| c25045.graph_c0 | 1.86562029    | 1.7806285     | 2.28588914    | 0.40992993     | 0.22777126     | 0.61753749     | 1.819E-19 | -3.33029 | down      | -                                                                                                             |
| c25047.graph_c0 | 148.446321    | 148.429078    | 136.401223    | 39.3257742     | 39.0691109     | 38.7727778     | 0         | -2.97619 | down      | hypothetical protein MIMGU_mgv1a010693mg [Erythranthe guttata]                                                |
| c25052.graph_c0 | 0.73141491    | 1.46429462    | 1.35762916    | 0.59065349     | 0.26665236     | 0.45787        | 6.959E-05 | -2.52872 | down      | -                                                                                                             |
| c25059.graph_c0 | 7.0898624     | 8.15240743    | 7.42876855    | 6.88370733     | 6.51358331     | 6.25314473     | 4.012E-31 | -1.2973  | down      | PREDICTED: lysine-specific demethylase JMJ106 [Sesamum indicum]                                               |
| c25062.graph_c0 | 1.14013102    | 1.14127269    | 0.45784797    | 6.4737551      | 7.57537127     | 7.26876306     | 1.859E-07 | 1.87973  | up        | hypothetical protein MIMGU_mgv1a010838mg [Erythranthe guttata]                                                |
| c25075.graph_c0 | 4.25003957    | 4.2004435     | 2.41963821    | 1.60310221     | 2.18882833     | 1.56336091     | 1.522E-06 | -2.10633 | down      | -                                                                                                             |
| c25081.graph_c0 | 0.32712571    | 0.53211157    | 0.63055423    | 2.55584562     | 2.01251944     | 1.91579515     | 0.007672  | 1.02372  | up        | PREDICTED: putative RING-H2 finger protein ATL21A [Sesamum indicum]                                           |
| c25082.graph_c0 | 2.10830795    | 1.48688618    | 1.72407403    | 11.2485195     | 12.8290844     | 12.4466583     | 2.102E-14 | 1.69092  | up        | PREDICTED: delta(7)-sterol-C(6)-desaturase-like [Solanum tuberosum]                                           |
| c25091.graph_c0 | 62.6735645    | 34.4773403    | 37.7854548    | 0              | 0              | 0              | 3.872E-33 | -Inf     | down      | -                                                                                                             |
| c25102.graph_c0 | 0             | 0.07307332    | 0             | 1.91002101     | 1.96409349     | 2.25125557     | 1.209E-12 | 5.30836  | up        | PREDICTED: ubiquitin-conjugating enzyme E2 20-like [Sesamum indicum]                                          |
| c25105.graph_c0 | 0             | 0             | 0             | 8.53987796     | 9.58809915     | 8.11978322     | 6.747E-23 | Inf      | up        | PREDICTED: protein IWS1 homolog [Sesamum indicum]                                                             |
| c25108.graph_c0 | 28.4828901    | 28.7615115    | 25.0432284    | 16.7062319     | 17.6419101     | 16.2400381     | 5.329E-66 | -1.79103 | down      | PREDICTED: LOW QUALITY PROTEIN: probable carboxylesterase 13 [Sesamum indicum]                                |
| c25114.graph_c0 | 0.20725532    | 0.10373143    | 0.53266258    | 2.93732343     | 2.99214402     | 2.08954579     | 6.402E-06 | 2.14008  | up        | -                                                                                                             |
| c25122.graph_c0 | 7.11268892    | 10.0122345    | 8.56883143    | 184.727469     | 180.794201     | 194.763968     | 2.25E-179 | 3.35517  | up        | PREDICTED: PEAKL11-like lipid transfer protein 1 [Sesamum indicum]                                            |
| c25137.graph_c0 | 6.01441083    | 9.73893631    | 7.04680698    | 5.14263427     | 2.20557537     | 3.35707805     | 9.156E-07 | -2.18132 | down      | PREDICTED: PHD finger protein ALFIN-LIKE 4-like [Sesamum indicum]                                             |
| c25141.graph_c0 | 29.3142446    | 27.9363566    | 29.4401147    | 7.26579293     | 5.91113048     | 6.57729322     | 7.44E-167 | -3.22429 | down      | hypothetical protein MIMGU_mgv1a024254mg, partial [Erythranthe guttata]                                       |

| #ID             | 0 h-1<br>FPKM | 0 h-2<br>FPKM | 0 h-3<br>FPKM | 28 h-1<br>FPKM | 28 h-2<br>FPKM | 28 h-3<br>FPKM | FDR       | log2FC   | regulated | nr_annotation                                                                                           |
|-----------------|---------------|---------------|---------------|----------------|----------------|----------------|-----------|----------|-----------|---------------------------------------------------------------------------------------------------------|
| c25145.graph_c0 | 14.5828492    | 14.7371403    | 12.9562839    | 93.7658048     | 94.98689       | 86.0089045     | 8.24E-75  | 1.61084  | up        | PREDICTED: protein STRICTOSIDINE SYNTHASE-LIKE 11 [Sesamum indicum]                                     |
| c25166.graph_c0 | 0             | 0             | 0             | 46.8989485     | 40.113294      | 38.2115247     | 3.864E-85 | Inf      | up        | hypothetical protein MIMGU_mgv1a01541/mg [Erythranthe guttata]                                          |
| c25182.graph_c0 | 63.8314566    | 57.7060787    | 53.7491973    | 38.0655055     | 36.756359      | 43.0326233     | 5.882E-39 | -1.66054 | down      | -                                                                                                       |
| c25187.graph_c1 | 3.43660287    | 4.49851922    | 2.24205592    | 3.1509486      | 2.98379219     | 3.32367955     | 0.0057466 | -1.19013 | down      | hypothetical protein MIMGU_mgv1a002261mg [Erythranthe guttata]                                          |
| c25203.graph_c0 | 2.31816883    | 2.17078108    | 0.67266358    | 80.5458272     | 72.9216198     | 70.824835      | 1.29E-137 | 4.36319  | up        | hypothetical protein MIMGU_mgv1a012619mg [Erythranthe guttata]                                          |
| c25206.graph_c0 | 1.41362179    | 1.50347715    | 1.19211748    | 0.06421326     | 0.17393566     | 0.23578873     | 2.236E-21 | -4.20137 | down      | -                                                                                                       |
| c25210.graph_c0 | 1.86423018    | 1.73280429    | 4.19231679    | 23.0818895     | 25.7779066     | 28.0742648     | 4.7E-17   | 2.20198  | up        | PREDICTED: 60S acidic ribosomal protein P1-like [Arenaria bacchariana]                                  |
| c25213.graph_c0 | 4.97758299    | 4.85057874    | 4.40546149    | 4.71975291     | 5.32145996     | 4.7310138      | 3.393E-09 | -1.03582 | down      | PREDICTED: hydroxymethylglutaryl-CoA lyase, mitochondrial [Sesamum indicum]                             |
| c25220.graph_c0 | 3.4938305     | 3.49732904    | 2.87927088    | 16.3122159     | 17.3451226     | 17.4096799     | 8.324E-16 | 1.28327  | up        | PREDICTED: probable RNA 3'-terminal phosphate cyclase-like protein [Sesamum indicum]                    |
| c25222.graph_c0 | 0             | 0             | 0             | 2.00196177     | 1.60674113     | 1.40021525     | 1.762E-14 | Inf      | up        | PREDICTED: fructose-1,6-bisphosphatase, chloroplastic [Sesamum indicum]                                 |
| c25224.graph_c0 | 0.30007715    | 0.15018882    | 0.38561102    | 23.0453021     | 25.0743199     | 24.2919771     | 1.225E-90 | 5.34052  | up        | PREDICTED: alpha carbonic anhydrase 1, chloroplastic [Sesamum indicum]                                  |
| c25226.graph_c0 | 1.53320517    | 1.98947836    | 1.82428643    | 15.2703753     | 15.3900735     | 14.7168626     | 7.982E-19 | 1.993    | up        | PREDICTED: uncharacterized protein LOC105161424 [Sesamum indicum]                                       |
| c25229.graph_c0 | 5.18272245    | 3.2709317     | 3.78604852    | 0              | 0              | 0              | 7.24E-50  | -Inf     | down      | --                                                                                                      |
| c25236.graph_c0 | 2.34768629    | 2.64379179    | 2.01124656    | 2.32244329     | 1.43362808     | 2.82330444     | 3.502E-06 | -1.17577 | down      | PREDICTED: uncharacterized protein LOC105167293 [Sesamum indicum]                                       |
| c25243.graph_c0 | 3.0344506     | 2.87180792    | 2.22147019    | 0.05346476     | 0.10861574     | 0.07634691     | 1.619E-71 | -6.17885 | down      | hypothetical protein MIMGU_mgv1a019304mg, partial [Erythranthe guttata]                                 |
| c25252.graph_c0 | 103.496319    | 104.193991    | 106.68728     | 39.7236847     | 38.0475866     | 38.6084473     | 3.98E-203 | -2.52459 | down      | hypothetical protein MIMGU_mgv1a00455/mg [Erythranthe guttata]                                          |
| c25257.graph_c0 | 22.0544113    | 11.7446956    | 14.5104853    | 0              | 0              | 0              | 5.241E-31 | -Inf     | down      | secreted protein [Achlya hypogyna]                                                                      |
| c25258.graph_c0 | 0             | 0.15909452    | 0.13615882    | 2.27176172     | 2.22501731     | 1.97941623     | 1.345E-09 | 3.3503   | up        | PREDICTED: uncharacterized protein At4g06744-like [Nicotiana tomentosiformis]                           |
| c25260.graph_c0 | 0.83073167    | 0.95035832    | 0.76251649    | 3.45011996     | 4.33522932     | 3.40178423     | 0.0013036 | 1.04699  | up        | PREDICTED: probable leucine-rich repeat receptor-like protein kinase At1g35710-like [Solanum tuberosum] |
| c25262.graph_c0 | 4.35303401    | 2.31486498    | 2.85517949    | 0              | 0              | 0              | 1.915E-21 | -Inf     | down      | --                                                                                                      |
| c25264.graph_c0 | 0.15727397    | 0.19678932    | 0.15157746    | 1.08590524     | 1.23848921     | 1.02599873     | 0.00054   | 1.63803  | up        | PREDICTED: F-box protein At3g07870-like [Sesamum indicum]                                               |
| c25282.graph_c0 | 0.8141608     | 0.67914672    | 0.87185739    | 9.91143359     | 13.9356558     | 9.25452358     | 1.25E-10  | 2.71336  | up        | unnamed protein product [Coffea canephora]                                                              |
| c25287.graph_c0 | 0             | 0             | 0             | 4.89856468     | 6.10651709     | 5.20923957     | 7.938E-31 | Inf      | up        | PREDICTED: GDSL esterase/lipase At3g48460 [Sesamum indicum]                                             |

| #ID             | 0 h-1<br>FPKM | 0 h-2<br>FPKM | 0 h-3<br>FPKM | 28 h-1<br>FPKM | 28 h-2<br>FPKM | 28 h-3<br>FPKM | FDR       | log2FC   | regulated | nr_annotation                                                                                               |
|-----------------|---------------|---------------|---------------|----------------|----------------|----------------|-----------|----------|-----------|-------------------------------------------------------------------------------------------------------------|
| c25288.graph_c0 | 12.0281435    | 10.3785908    | 10.2387938    | 7.33138902     | 6.803899       | 6.92135591     | 1.76E-51  | -1.72144 | down      | PREDICTED: uncharacterized aarF domain-containing protein kinase At5g05200, chloroplastic [Sesamum indicum] |
| c25291.graph_c0 | 0.09626664    | 0.03212101    | 0.08247096    | 1.81911695     | 1.41085855     | 1.25601772     | 8.165E-10 | 3.31956  | up        | PREDICTED: purple acid phosphatase 22-like [Sesamum indicum]                                                |
| c25311.graph_c0 | 23.2037019    | 12.4851816    | 14.5117501    | 0              | 0              | 0              | 9.505E-29 | -Inf     | down      | putative Trypsin [Glarea lozoyensis 74030]                                                                  |
| c25312.graph_c0 | 0.40427861    | 0.32374675    | 0.41561122    | 26.9439692     | 34.1439247     | 34.2138561     | 1.914E-58 | 5.28958  | up        | PREDICTED: uncharacterized protein LOC105158282 [Sesamum indicum]                                           |
| c25316.graph_c0 | 5.95631368    | 4.25877002    | 4.81114788    | 3.46321156     | 2.23353952     | 2.62409862     | 1.47E-07  | -1.94115 | down      | -                                                                                                           |
| c25324.graph_c0 | 0.85452749    | 0.85538317    | 1.2478428     | 7.81978124     | 7.74873972     | 7.04891176     | 4.107E-13 | 1.83852  | up        | PREDICTED: protein BASIC PENTACYSSTEINE4 isoform X2 [Sesamum indicum]                                       |
| c25329.graph_c0 | 0.94418337    | 1.03514109    | 0.80887534    | 8.43078921     | 7.5532028      | 7.7327209      | 7.928E-13 | 2.00013  | up        | PREDICTED: probable plastid-lipid-associated protein 13, chloroplastic [Sesamum indicum]                    |
| c25337.graph_c0 | 4.66134813    | 3.70602209    | 3.98379115    | 28.1401527     | 27.6764837     | 27.6709596     | 1.609E-54 | 1.66786  | up        | PREDICTED: peroxisomal fatty acid beta-oxidation multifunctional protein AIM1 [Sesamum indicum]             |
| c25352.graph_c0 | 0.67709229    | 0.79737682    | 0.61418146    | 4.77633047     | 5.01827327     | 4.67693599     | 7.144E-08 | 1.70348  | up        | PREDICTED: transcription factor bHLH62 isoform X2 [Sesamum indicum]                                         |
| c25353.graph_c0 | 3544.28683    | 3972.98757    | 3769.0428     | 515.558583     | 510.278448     | 575.037981     | 8.51E-173 | -3.90809 | down      | hypothetical protein MIMGU_mgv1a005193mg [Erythranthe guttata]                                              |
| c25360.graph_c0 | 0.20923553    | 0.38398259    | 0.26887594    | 3.24418514     | 3.54707208     | 2.97813216     | 4.168E-10 | 2.41012  | up        | PREDICTED: subtilisin-like protease [Sesamum indicum]                                                       |
| c25363.graph_c0 | 14.5785624    | 16.6689119    | 14.5350232    | 5.02378303     | 6.84524399     | 5.62731141     | 8.36E-56  | -2.47839 | down      | PREDICTED: probable WRKY transcription factor 7 [Sesamum indicum]                                           |
| c25365.graph_c0 | 11.9350735    | 14.7216069    | 10.518026     | 9.31425313     | 8.73088572     | 9.14750044     | 1.282E-10 | -1.53933 | down      | PREDICTED: uncharacterized protein LOC105168447 isoform X2 [Sesamum indicum]                                |
| c25367.graph_c0 | 0.49928036    | 0.58307703    | 0.85546004    | 5.50359034     | 5.07843983     | 6.070097       | 6.409E-07 | 2.00641  | up        | hypothetical protein MIMGU_mgv1a014003mg [Erythranthe guttata]                                              |
| c25379.graph_c0 | 3.26135044    | 4.64579996    | 4.02977349    | 18.6435626     | 20.2082983     | 21.0155063     | 1.99E-11  | 1.23454  | up        | PREDICTED: CBL-interacting protein kinase 25-like [Malus domestical]                                        |
| c25389.graph_c0 | 105.964818    | 101.507201    | 100.604851    | 60.2396698     | 63.6234148     | 68.9269538     | 4.87E-104 | -1.76576 | down      | PREDICTED: vacuolar cation/proton exchanger 5-like [Sesamum indicum]                                        |
| c25391.graph_c0 | 6.69734689    | 3.86335273    | 4.23024274    | 0              | 0              | 0              | 3.077E-21 | -Inf     | down      | PREDICTED: 60S ribosomal protein L9-like [Phoenix dactylifera]                                              |
| c25397.graph_c0 | 26.4134521    | 24.0362738    | 18.5139991    | 22.5130152     | 23.7937863     | 21.716989      | 4.151E-08 | -1.1064  | down      | PREDICTED: U3 small nucleolar ribonucleoprotein protein MPP10 [Sesamum indicum]                             |
| c25411.graph_c0 | 114.718066    | 124.119637    | 134.439611    | 10.0519479     | 8.8962444      | 12.3440666     | 2.02E-99  | -4.6674  | down      | PREDICTED: basic 7S globulin [Sesamum indicum]                                                              |
| c25414.graph_c0 | 8.31181414    | 8.19407448    | 6.79700652    | 7.32239832     | 8.76015686     | 7.54345925     | 4.131E-05 | -1.06858 | down      | PREDICTED: protein SOMBRERO-like [Sesamum indicum]                                                          |
| c25418.graph_c0 | 0.37335694    | 0.2802981     | 0.9595569     | 6.44464974     | 6.55393524     | 5.70162632     | 7.492E-09 | 2.42884  | up        | -                                                                                                           |
| c25429.graph_c0 | 2.31751076    | 2.3198314     | 3.37517216    | 20.6614025     | 15.6136828     | 16.7679078     | 1.751E-07 | 1.63088  | up        | PREDICTED: alpha-soluble NSF attachment protein-like [Sesamum indicum]                                      |
| c25448.graph_c0 | 3.72238792    | 2.78248872    | 3.35460332    | 25.7716662     | 27.6790047     | 26.1184        | 2.524E-62 | 1.92255  | up        | PREDICTED: putative invertase inhibitor [Sesamum indicum]                                                   |
| c25449.graph_c0 | 0.02876356    | 0.37430067    | 0.18481155    | 2.17413951     | 2.64255941     | 2.42230165     | 5.195E-10 | 2.52606  | up        | PREDICTED: F-box/LRR-repeat protein 17-like [Sesamum indicum]                                               |
| c25457.graph_c0 | 3.1410753     | 3.98267945    | 3.5366606     | 37.3963289     | 34.8843477     | 35.9262067     | 7.065E-84 | 2.25215  | up        | PREDICTED: biotin carboxylase 2, chloroplastic [Sesamum indicum]                                            |

| #ID             | 0 h-1<br>FPKM | 0 h-2<br>FPKM | 0 h-3<br>FPKM | 28 h-1<br>FPKM | 28 h-2<br>FPKM | 28 h-3<br>FPKM | FDR       | log2FC   | regulated | nr_annotation                                                                                     |
|-----------------|---------------|---------------|---------------|----------------|----------------|----------------|-----------|----------|-----------|---------------------------------------------------------------------------------------------------|
| c25460.graph_c0 | 0.2311598     | 0.23139128    | 0.198033      | 7.33624512     | 7.83748804     | 7.54001647     | 1.265E-17 | 4.01506  | up        | -                                                                                                 |
| c25462.graph_c0 | 13.5460463    | 13.3702305    | 11.8155056    | 4.37258365     | 4.51913219     | 4.39828013     | 7.764E-85 | -2.63205 | down      | PREDICTED: uncharacterized protein LOC105160924 [Sesamum indicum]                                 |
| c25464.graph_c0 | 0.13398266    | 0.10058762    | 0.30130279    | 5.55053597     | 5.09953661     | 5.78067929     | 2.563E-26 | 3.83525  | up        | PREDICTED: alanine--glyoxylate aminotransferase 2 homolog 3, mitochondrial-like [Sesamum indicum] |
| c25466.graph_c0 | 0.07882468    | 0.23671083    | 0             | 3.55193801     | 2.58634435     | 3.45932384     | 2.281E-10 | 3.85165  | up        | PREDICTED: uncharacterized protein LOC105177131 [Sesamum indicum]                                 |
| c25483.graph_c0 | 1.05602619    | 1.31334634    | 0.74020116    | 0.06977398     | 0.04199957     | 0              | 7.675E-19 | -5.89034 | down      | hypothetical protein VITISV_009673 [Vitis vinifera]                                               |
| c25484.graph_c0 | 23.2951542    | 26.6633448    | 22.5740818    | 5.89801896     | 6.57838357     | 8.71954396     | 1.328E-71 | -2.86298 | down      | hypothetical protein MIMGU_mgv1a0128/1mg [Erythranthe diffusa]                                    |
| c25495.graph_c0 | 29.027103     | 33.7022065    | 30.579227     | 31.3773717     | 28.9593243     | 28.8369082     | 2.56E-23  | -1.15631 | down      | PREDICTED: uncharacterized protein LOC105164353 [Sesamum indicum]                                 |
| c25502.graph_c0 | 7.84809105    | 6.90371339    | 8.12920804    | 5.80765548     | 5.39983291     | 6.54433256     | 2.821E-16 | -1.45677 | down      | PREDICTED: chaperone protein dnaJ 10 [Sesamum indicum]                                            |
| c25506.graph_c0 | 13.3334905    | 15.1599978    | 12.672741     | 4.24196856     | 4.68857055     | 4.17756585     | 5.287E-73 | -2.74092 | down      | PREDICTED: serine acetyltransferase 1, chloroplastic-like [Sesamum indicum]                       |
| c25512.graph_c0 | 1.26174657    | 0.84200668    | 0.54046477    | 10.0873315     | 10.4879016     | 9.97718802     | 1.236E-06 | 2.44923  | up        | -                                                                                                 |
| c25519.graph_c0 | 0             | 0             | 0             | 3.37850101     | 4.49542896     | 4.20779199     | 2.777E-14 | Inf      | up        | PREDICTED: ethylene-responsive transcription factor CRF4-like [Sesamum indicum]                   |
| c25523.graph_c0 | 3.1296977     | 4.20084239    | 4.47880652    | 3.6704519      | 3.64081361     | 3.24816233     | 1.512E-05 | -1.25628 | down      | PREDICTED: uncharacterized protein LOC105168847 isoform X1 [Sesamum indicum]                      |
| c25529.graph_c0 | 4.67367251    | 4.8516248     | 5.00487851    | 0              | 0              | 0              | 3.741E-52 | -Inf     | down      | -                                                                                                 |
| c25539.graph_c0 | 1.18988269    | 1.48884272    | 0.99388013    | 21.317317      | 22.4879964     | 19.8469586     | 1.301E-78 | 3.02714  | up        | PREDICTED: E3 ubiquitin-protein ligase A1L6-like [Sesamum indicum]                                |
| c25564.graph_c0 | 0             | 0             | 0             | 41.3792518     | 40.8034396     | 37.8899774     | 5.13E-233 | Inf      | up        | PREDICTED: low-temperature-induced cysteine proteinase [Sesamum indicum]                          |
| c25568.graph_c0 | 4.28856398    | 4.68760393    | 6.01773079    | 23.681302      | 21.6731269     | 22.3348627     | 1.883E-13 | 1.07962  | up        | PREDICTED: uncharacterized membrane protein At4g09580 [Sesamum indicum]                           |
| c25571.graph_c0 | 50.8473951    | 48.2284602    | 45.1278551    | 23.1127789     | 23.135055      | 22.9562769     | 7.27E-138 | -2.14833 | down      | PREDICTED: leucine-rich repeat extensin-like protein 5 [Nicotiana tomentosiformis]                |
| c25584.graph_c0 | 5.09613289    | 5.14637958    | 4.34650389    | 4.4904963      | 3.78814331     | 3.79793854     | 4.725E-11 | -1.36137 | down      | PREDICTED: uncharacterized protein At5g19025-like [Sesamum indicum]                               |
| c25587.graph_c0 | 17.5449738    | 18.6118767    | 21.3406974    | 20.5709545     | 19.732233      | 18.781695      | 3.843E-09 | -1.05404 | down      | hypothetical protein MIMGU_mgv1a012/10mg [Erythranthe diffusa]                                    |
| c25589.graph_c0 | 0             | 0             | 0             | 4.78819576     | 3.7593842      | 3.05775285     | 1.391E-14 | Inf      | up        | putative protein, contains domain DUF1677 [Arachis hypogaea]                                      |
| c25603.graph_c0 | 9.74293119    | 6.38969165    | 6.23604138    | 0              | 0              | 0              | 2.075E-40 | -Inf     | down      | -                                                                                                 |
| c25609.graph_c0 | 2.64255414    | 2.36675813    | 2.94897266    | 17.2853381     | 15.561405      | 17.2803131     | 1.433E-12 | 1.563    | up        | PREDICTED: histidine-containing phosphotransfer protein 1 [Sesamum indicum]                       |

| #ID             | 0 h-1<br>FPKM | 0 h-2<br>FPKM | 0 h-3<br>FPKM | 28 h-1<br>FPKM | 28 h-2<br>FPKM | 28 h-3<br>FPKM | FDR       | log2FC   | regulated | nr_annotation                                                                              |
|-----------------|---------------|---------------|---------------|----------------|----------------|----------------|-----------|----------|-----------|--------------------------------------------------------------------------------------------|
| c25625.graph_c0 | 10.4362608    | 9.55972623    | 10.9438889    | 2.7549344      | 2.64897003     | 2.27719883     | 1.531E-66 | -3.1023  | down      | PREDICTED: LOW QUALITY PROTEIN: benzyl alcohol O-benzoyltransferase-like [Sesamum indicum] |
| c25626.graph_c0 | 0.30293634    | 0.30323968    | 0.06488086    | 4.07318911     | 4.40662294     | 3.8926088      | 6.171E-12 | 3.12785  | up        | PREDICTED: serine/threonine-protein kinase WAG1 [Sesamum indicum]                          |
| c25628.graph_c0 | 0.51863669    | 0.43718402    | 0.66646868    | 4.78121367     | 5.05141295     | 4.41946369     | 1.45E-13  | 2.03987  | up        | PREDICTED: uncharacterized protein At5g08430 [Sesamum indicum]                             |
| c25636.graph_c0 | 0.92690603    | 1.85566837    | 2.08444416    | 8.08403952     | 11.7090206     | 11.2690383     | 0.0002026 | 1.57597  | up        | -                                                                                          |
| c25645.graph_c0 | 0             | 0.0623051     | 0             | 2.26188428     | 2.40987793     | 2.14098776     | 7.282E-13 | 5.69061  | up        | -                                                                                          |
| c25649.graph_c0 | 10.8224193    | 6.1270056     | 12.0833373    | 53.9636674     | 56.6410759     | 56.7127324     | 4.743E-15 | 1.43319  | up        | PREDICTED: V-type proton ATPase subunit F [Sesamum indicum]                                |
| c25664.graph_c0 | 8.61478446    | 8.62341086    | 8.01645245    | 6.89538961     | 7.11530321     | 6.84879406     | 2.692E-36 | -1.36558 | down      | PREDICTED: putative leucine-rich repeat-containing protein DDB_G0290503 [Sesamum indicum]  |
| c25683.graph_c0 | 0.15225949    | 0.30482391    | 0.13043965    | 9.51687353     | 10.624486      | 8.48808096     | 7.77E-33  | 4.51905  | up        | PREDICTED: DNA-damage-repair/toleration protein DRT100-like [Sesamum indicum]              |
| c25690.graph_c0 | 16.7306371    | 16.3517826    | 17.7752028    | 143.810357     | 168.057983     | 172.19385      | 6.438E-39 | 2.15956  | up        | lipid transfer protein 2 [Tamarix hispida]                                                 |
| c25692.graph_c0 | 0.17288249    | 0.46148163    | 0.22216085    | 1.80098335     | 1.92865289     | 1.26452895     | 0.0021658 | 1.452    | up        | PREDICTED: uncharacterized protein LOC105177785 [Sesamum indicum]                          |
| c25695.graph_c0 | 16.1641509    | 19.5279928    | 12.8927011    | 10.937804      | 9.87581153     | 9.58628165     | 6.675E-10 | -1.76396 | down      | PREDICTED: plasma membrane ATPase 4-like [Cicer arietinum]                                 |
| c25697.graph_c0 | 0.62249915    | 1.63569652    | 0.19998401    | 10.9148446     | 9.24233014     | 10.7061678     | 5.468E-13 | 2.57072  | up        | hypothetical protein F383_00208 [Gossypium arboreum]                                       |
| c25703.graph_c0 | 5.61586181    | 4.26816472    | 5.34563316    | 4.38391496     | 3.34405077     | 2.83712043     | 1.375E-07 | -1.61933 | down      | hypothetical protein MIMGU_mgv1a015960mg [Erythranthe outtata]                             |
| c25707.graph_c0 | 16.1342975    | 18.9433891    | 17.7713238    | 3.96754999     | 4.90911293     | 5.53970236     | 4.571E-65 | -2.96457 | down      | PREDICTED: heterogeneous nuclear ribonucleoprotein 1-like [Sesamum indicum]                |
| c25715.graph_c0 | 54.9727546    | 67.2245384    | 41.6316857    | 41.4643076     | 49.2826607     | 44.3867246     | 1.539E-05 | -1.36468 | down      | PREDICTED: L-lactate dehydrogenase B [Sesamum indicum]                                     |
| c25716.graph_c0 | 1.2244194     | 1.13809937    | 1.01148905    | 30.1930685     | 30.7624618     | 24.1186174     | 9.803E-39 | 3.56685  | up        | hypothetical protein MIMGU_mgv1a000915mg [Erythranthe outtata]                             |
| c25721.graph_c0 | 16.3504774    | 15.2447728    | 17.2359829    | 78.9981393     | 86.0145636     | 74.2732398     | 5.156E-32 | 1.20081  | up        | PREDICTED: phospho-2-dehydro-3-deoxyheptonate aldolase 2, chloroplastic [Sesamum indicum]  |
| c25731.graph_c0 | 1.6763807     | 1.38622293    | 2.4352002     | 140.537926     | 139.04135      | 133.524208     | 0         | 5.13475  | up        | PREDICTED: major pollen allergen Lol p 11-like [Sesamum indicum]                           |
| c25751.graph_c0 | 0.29458342    | 0.0737196     | 0.18927568    | 10.5445006     | 10.8738907     | 10.1765723     | 5.63E-27  | 4.73764  | up        | -                                                                                          |
| c25755.graph_c0 | 75.0770244    | 66.9483368    | 74.5678409    | 23.3479678     | 24.7319298     | 26.1473753     | 5.395E-94 | -2.6354  | down      | PREDICTED: zinc finger protein CONSTANS-LIKE 1-like [Sesamum indicum]                      |
| c25776.graph_c0 | 0             | 0             | 0             | 7.03293736     | 6.41056002     | 13.6638558     | 3.546E-08 | Inf      | up        | --                                                                                         |
| c25782.graph_c0 | 5.23884172    | 5.57479585    | 3.63898326    | 59.5831681     | 59.4039099     | 57.3244027     | 2.433E-98 | 2.52266  | up        | PREDICTED: uncharacterized protein LOC105165646 [Sesamum indicum]                          |
| c25784.graph_c0 | 0             | 0.04984908    | 0             | 22.2591756     | 20.4574241     | 21.6778313     | 9.376E-97 | 9.25363  | up        | PREDICTED: uncharacterized protein LOC105164223 [Sesamum indicum]                          |
| c25786.graph_c0 | 0.84317208    | 0.62190681    | 1.19756313    | 4.77348767     | 3.49460417     | 3.89512696     | 0.0004782 | 1.09498  | up        | PREDICTED: glutathione S-transferase U17-like [Sesamum indicum]                            |

| #ID             | 0 h-1<br>FPKM | 0 h-2<br>FPKM | 0 h-3<br>FPKM | 28 h-1<br>FPKM | 28 h-2<br>FPKM | 28 h-3<br>FPKM | FDR       | log2FC   | regulated | nr_annotation                                                                                     |
|-----------------|---------------|---------------|---------------|----------------|----------------|----------------|-----------|----------|-----------|---------------------------------------------------------------------------------------------------|
| c25786.graph_c1 | 1.69570615    | 2.73470667    | 2.54222446    | 12.6324019     | 11.869528      | 12.0398937     | 2.233E-10 | 1.29564  | up        | PREDICTED: pentatricopeptide repeat-containing protein At1g59720, mitochondrial [Sesamum indicum] |
| c25787.graph_c0 | 0.2619825     | 0.61190461    | 0.44887717    | 2.66570316     | 3.20917336     | 3.05562687     | 0.000309  | 1.66133  | up        | PREDICTED: uncharacterized protein LOC105177716 [Sesamum indicum]                                 |
| c25799.graph_c0 | 19.0708916    | 18.6908944    | 22.2867179    | 205.59106      | 212.316137     | 218.991261     | 2.02E-151 | 2.31431  | up        | PREDICTED: 60S ribosomal protein L11 [Sesamum indicum]                                            |
| c25801.graph_c0 | 2.22893739    | 1.673377      | 2.27839881    | 18.4272594     | 18.5495561     | 18.0708305     | 4.968E-50 | 2.06305  | up        | nypothetical protein MIMGU_mgv1a005196mg [Erythranthe                                             |
| c25802.graph_c0 | 45.4154571    | 42.6499905    | 42.1889659    | 32.8817089     | 34.512157      | 32.6292136     | 8.982E-67 | -1.47094 | down      | nypothetical protein MIMGU_mgv1a008591mg [Erythranthe                                             |
| c25803.graph_c0 | 17.365853     | 16.4683348    | 11.6864367    | 12.8206872     | 10.8561347     | 11.6811898     | 2.368E-08 | -1.4501  | down      | PREDICTED: uncharacterized protein LOC105171564 [Sesamum indicum]                                 |
| c25804.graph_c0 | 8.46040903    | 7.84616902    | 8.63361574    | 103.62834      | 101.731306     | 84.7812398     | 1.312E-42 | 2.44829  | up        | PREDICTED: photosystem II 10 kDa polypeptide, chloroplastic [Sesamum indicum]                     |
| c25813.graph_c0 | 0             | 0             | 0             | 7.4811127      | 6.98766553     | 6.42027826     | 1.036E-14 | Inf      | up        | PREDICTED: root phototropism protein 2-like [Malus domestica]                                     |
| c25815.graph_c0 | 3.17671004    | 2.62686651    | 3.99345473    | 37.0916076     | 41.3303147     | 37.0241811     | 4.642E-50 | 2.46397  | up        | nypothetical protein MIMGU_mgv1a012869mg [Erythranthe                                             |
| c25818.graph_c0 | 0.43468377    | 0.34809523    | 0.44686869    | 90.7338496     | 99.5526863     | 101.570347     | 4.28E-208 | 6.79954  | up        | PREDICTED: kirola-like isoform X2 [Sesamum indicum]                                               |
| c25832.graph_c0 | 0.25351165    | 0.03625222    | 0             | 1.02654022     | 1.33088964     | 1.54642788     | 3.643E-05 | 2.69134  | up        | unnamed protein product [Coffea canephora]                                                        |
| c25837.graph_c0 | 1.12303395    | 1.51329029    | 1.38763759    | 0.03139287     | 0.17006891     | 0.1024653      | 3.228E-24 | -4.82031 | down      | PREDICTED: uncharacterized protein LOC104248035 [Nicotiana sylvestris]                            |
| c25838.graph_c0 | 24.6119354    | 26.6700761    | 21.2856826    | 11.4709149     | 14.151368      | 12.4416159     | 5.532E-37 | -2.01969 | down      | PREDICTED: myb-related protein 306-like [Sesamum indicum]                                         |
| c25840.graph_c0 | 0.40941551    | 0.51228184    | 0.7891727     | 2.97560831     | 5.10472109     | 4.06702073     | 0.0001732 | 1.72848  | up        | -                                                                                                 |
| c25843.graph_c0 | 0.27103202    | 0.13565171    | 0.08707172    | 1.60049916     | 1.55626227     | 1.26580981     | 1.442E-05 | 2.08407  | up        | PREDICTED: serine/threonine-protein kinase D6PKL1-like [Sesamum indicum]                          |
| c25847.graph_c0 | 18.592017     | 11.9040993    | 16.7886061    | 74.2582719     | 70.8952883     | 78.4743825     | 3.485E-13 | 1.15181  | up        | PREDICTED: probable small nuclear ribonucleoprotein G [Sesamum indicum]                           |
| c25849.graph_c0 | 0.43318055    | 0.28907621    | 0.33399249    | 4.34469713     | 3.37327555     | 3.92202589     | 5.466E-13 | 2.37439  | up        | PREDICTED: cell division cycle 20.2, cofactor of APC complex-like [Sesamum indicum]               |
| c25850.graph_c0 | 30.1776056    | 31.3102992    | 29.579921     | 2.28134281     | 1.9514261      | 2.841324       | 0         | -4.7749  | down      | PREDICTED: vacuolar iron transporter 1 [Nicotiana sylvestris]                                     |
| c25855.graph_c0 | 9.58700699    | 12.079826     | 6.77416562    | 153.629251     | 154.279846     | 141.574286     | 1.41E-193 | 2.89603  | up        | PREDICTED: luminal-binding protein 5 [Sesamum indicum]                                            |
| c25861.graph_c0 | 0.64957853    | 0.68635281    | 0.46374118    | 3.04248622     | 2.84180668     | 2.88928386     | 0.0008279 | 1.19919  | up        | PREDICTED: uncharacterized protein LOC104225770 [Nicotiana sylvestris]                            |
| c25862.graph_c0 | 1.24426506    | 1.09723589    | 1.25630204    | 11.1318061     | 11.8395457     | 13.3704357     | 9.711E-33 | 2.24609  | up        | PREDICTED: cell division protein FtsZ homolog 2-2, chloroplastic [Sesamum indicum]                |
| c25866.graph_c0 | 2.3414135     | 2.61161614    | 2.40704724    | 18.0382939     | 17.2965874     | 15.9489984     | 1.171E-14 | 1.70969  | up        | PREDICTED: protein DA1-related 1-like [Sesamum indicum]                                           |
| c25870.graph_c0 | 0.73219586    | 0.97723873    | 0.41817808    | 30.3328769     | 30.9647006     | 23.7381654     | 4.918E-39 | 4.23599  | up        | PREDICTED: transcription factor DIVARICATA-like [Sesamum indicum]                                 |

| #ID             | 0 h-1<br>FPKM | 0 h-2<br>FPKM | 0 h-3<br>FPKM | 28 h-1<br>FPKM | 28 h-2<br>FPKM | 28 h-3<br>FPKM | FDR       | log2FC   | regulated | nr_annotation                                                                               |
|-----------------|---------------|---------------|---------------|----------------|----------------|----------------|-----------|----------|-----------|---------------------------------------------------------------------------------------------|
| c25871.graph_c0 | 33.5445046    | 30.3021827    | 29.8062333    | 28.6613101     | 29.0193282     | 29.7437202     | 2.377E-38 | -1.1884  | down      | hypothetical protein MIMGU_mgv1a005352mg [Erythranthe                                       |
| c25878.graph_c0 | 1.558299      | 1.49746502    | 1.52188169    | 8.99254808     | 8.77389048     | 9.1492032      | 2.918E-13 | 1.46558  | up        | hypothetical protein MIMGU_mgv1a004655mg [Erythranthe                                       |
| c25880.graph_c0 | 7.72696086    | 9.0117668     | 9.06333032    | 5.12604925     | 4.83369492     | 4.48260649     | 1.811E-28 | -1.92981 | down      | PREDICTED: uncharacterized protein LOC105170968 [Sesamum indicum]                           |
| c25881.graph_c0 | 0.92666394    | 0.49692421    | 0.72298562    | 3.10288312     | 2.88848424     | 3.51329446     | 0.0008831 | 1.05894  | up        | PREDICTED: pentatricopeptide repeat-containing protein At5g44230 [Sesamum indicum]          |
| c25882.graph_c0 | 37.6074378    | 40.7464205    | 36.596318     | 30.4893681     | 30.7965826     | 28.3734658     | 1.754E-72 | -1.44881 | down      | PREDICTED: putative nuclear matrix constituent protein 1-like protein [Sesamum indicum]     |
| c25883.graph_c0 | 11.3283925    | 12.1217869    | 12.5495111    | 9.65296388     | 11.2791688     | 8.34007733     | 4.484E-07 | -1.39137 | down      | hypothetical protein CICLE_v10005060mg [Citrus clementina]                                  |
| c25884.graph_c0 | 0.77774645    | 1.02876551    | 1.0708232     | 0.10093958     | 0.07291118     | 0.0658927      | 5.954E-25 | -4.67998 | down      | -                                                                                           |
| c25886.graph_c0 | 0             | 0             | 0             | 8.19529096     | 8.50951626     | 7.72753569     | 5.194E-32 | Inf      | up        | hypothetical protein MIMGU_mgv1a010584mg [Erythranthe                                       |
| c25892.graph_c0 | 1.11969429    | 0.74721033    | 0.83933004    | 9.76544831     | 7.83758598     | 9.01992882     | 3.292E-09 | 2.21102  | up        | PREDICTED: 3-phosphoinositide-dependent protein kinase 2 [Nicotiana sylvestris]             |
| c25894.graph_c0 | 75.0972479    | 76.0151868    | 76.0195032    | 51.0313071     | 53.5901572     | 47.6992319     | 5.314E-85 | -1.66758 | down      | PREDICTED: uncharacterized protein LOC105164821 isoform X1 [Sesamum indicum]                |
| c25905.graph_c0 | 1.26373636    | 1.58125225    | 1.50795474    | 11.3825456     | 13.3280034     | 11.7506058     | 7.826E-19 | 1.97376  | up        | PREDICTED: uncharacterized protein LOC102616798 [Citrus sinensis]                           |
| c25908.graph_c0 | 0             | 0.018544      | 0.04761188    | 1.17138475     | 1.65333887     | 1.20853383     | 8.622E-17 | 4.81214  | up        | PREDICTED: putative receptor-like protein kinase At3g47110 [Sesamum indicum]                |
| c25914.graph_c0 | 5.57398691    | 5.69828264    | 3.04799739    | 26.3755174     | 24.5150493     | 29.1182798     | 1.987E-09 | 1.39946  | up        | PREDICTED: uncharacterized protein LOC105157918 [Sesamum indicum]                           |
| c25915.graph_c0 | 339.022346    | 362.994381    | 337.218742    | 47.0650705     | 43.3743705     | 45.1075397     | 0         | -4.02887 | down      | MYB-related transcription factor [Salvia miltiorrhiza]                                      |
| c25916.graph_c0 | 0.35866772    | 0.37897281    | 0.20484543    | 3.21502411     | 2.82440951     | 3.07248959     | 1.145E-12 | 2.18963  | up        | PREDICTED: putative pentatricopeptide repeat-containing protein At3g25970 [Sesamum indicum] |
| c25918.graph_c0 | 173.437929    | 173.357225    | 168.502999    | 65.3816929     | 74.4589688     | 67.5929124     | 1.62E-185 | -2.40321 | down      | PREDICTED: probable calcium-binding protein CML49 [Sesamum indicum]                         |
| c25922.graph_c0 | 0             | 0             | 0             | 1.81062133     | 0.9008199      | 1.26638762     | 5.451E-07 | Inf      | up        | hypothetical protein MIMGU_mgv1a027056mg [Erythranthe                                       |
| c25924.graph_c0 | 27.2664905    | 32.9951641    | 30.9896242    | 162.06007      | 148.313161     | 141.223369     | 1.891E-27 | 1.21512  | up        | hypothetical protein MIMGU_mgv1a012865mg [Erythranthe                                       |
| c25927.graph_c0 | 2.18595484    | 3.71984436    | 2.52813466    | 11.1211756     | 12.3365512     | 14.7789413     | 0.0050273 | 1.09117  | up        | PREDICTED: V-type proton ATPase subunit H [Beta vulgaris subsp. vulgaris]                   |
| c25928.graph_c0 | 0             | 0.12266246    | 0             | 5.78897724     | 4.98566197     | 3.92435293     | 2.988E-13 | 5.82193  | up        | BnaA07g08260D [Brassica napus]                                                              |
| c25929.graph_c0 | 0.18163122    | 0.44443201    | 0.18153591    | 4.16560231     | 3.9068266      | 3.65043918     | 1.326E-20 | 2.77147  | up        | PREDICTED: leucine-rich repeat receptor-like protein kinase TDR [Sesamum indicum]           |
| c25931.graph_c0 | 0.37946311    | 0.25322873    | 0.43344456    | 8.94790538     | 8.38347001     | 8.50165077     | 1.165E-28 | 3.50509  | up        | PREDICTED: putative GATA transcription factor 22 [Nicotiana tomentosiformis]                |
| c25936.graph_c0 | 90.9913325    | 99.3036651    | 89.1537202    | 2.35624618     | 2.41113196     | 3.33264124     | 0         | -6.19687 | down      | PREDICTED: heat shock 70 kDa protein-like [Sesamum indicum]                                 |

| #ID             | 0 h-1<br>FPKM | 0 h-2<br>FPKM | 0 h-3<br>FPKM | 28 h-1<br>FPKM | 28 h-2<br>FPKM | 28 h-3<br>FPKM | FDR       | log2FC   | regulated | nr_annotation                                                                                                        |
|-----------------|---------------|---------------|---------------|----------------|----------------|----------------|-----------|----------|-----------|----------------------------------------------------------------------------------------------------------------------|
| c25937.graph_c0 | 25.4693758    | 31.0309105    | 25.43523      | 18.8283269     | 20.8204866     | 17.4352793     | 1.024E-20 | -1.61203 | down      | PREDICTED: DEAD-box ATP-dependent RNA helicase 37-like [Vitis vinifera]                                              |
| c25938.graph_c0 | 1.93217941    | 1.02078249    | 2.20704626    | 13.2628037     | 12.6090424     | 12.0318951     | 5.793E-15 | 1.78235  | up        | PREDICTED: ataxin-3 homolog [Sesamum indicum]                                                                        |
| c25949.graph_c0 | 3.9174485     | 4.09643244    | 4.26997553    | 0.68637351     | 0.96402588     | 0.89197158     | 8.864E-43 | -3.36401 | down      | PREDICTED: abscisic acid 8&apos;-hydroxylase 4-like [Sesamum indicum]                                                |
| c25952.graph_c0 | 0.25653754    | 0.237041      | 0.40573648    | 5.20625778     | 5.68494435     | 5.59413254     | 4.031E-34 | 3.09887  | up        | PREDICTED: probably inactive leucine-rich repeat receptor-like protein kinase At2g25790 isoform X1 [Sesamum indicum] |
| c25953.graph_c0 | 0.20442775    | 0.13642164    | 0.26269776    | 16.145358      | 17.3054819     | 16.1245939     | 3.034E-46 | 5.26436  | up        | PREDICTED: probable pectate lyase 5 [Sesamum indicum]                                                                |
| c25953.graph_c1 | 0             | 0.09716702    | 0             | 5.36178373     | 6.05148499     | 4.77814808     | 8.22E-16  | 6.29794  | up        | PREDICTED: probable pectate lyase 5 [Sesamum indicum]                                                                |
| c25955.graph_c0 | 1.07686384    | 1.02404504    | 0.48433443    | 41.7939601     | 41.8346971     | 40.4580269     | 2.67E-124 | 4.50325  | up        | PREDICTED: probable xyloglucan endotransglucosylase/hydrolase protein 7 [Sesamum indicum]                            |
| c25958.graph_c0 | 2.64049313    | 2.40285198    | 2.36491451    | 18.8420255     | 19.7955048     | 22.3506056     | 1.784E-17 | 1.95266  | up        | -                                                                                                                    |
| c25968.graph_c0 | 0.52086309    | 0.78207698    | 0.7529959     | 8.23368627     | 8.88691562     | 7.91561641     | 1.411E-13 | 2.51175  | up        | PREDICTED: probable lipid phosphate phosphatase beta [Sesamum indicum]                                               |
| c25975.graph_c0 | 0.77442366    | 0.65593772    | 1.76067664    | 6.36449673     | 6.37201797     | 7.13647773     | 1.786E-06 | 1.53603  | up        | hypothetical protein MIMGU_mgv1a014840mg [Erythranthe outtara]                                                       |
| c25976.graph_c0 | 19.3563291    | 10.6376456    | 13.8186941    | 0              | 0              | 0              | 2.223E-32 | -Inf     | down      | cytochrome c oxidase subunit I [Lingulodinium polyedrum]                                                             |
| c25980.graph_c0 | 0.85810301    | 1.18618599    | 1.10269634    | 8.10763618     | 9.33154391     | 9.91153058     | 1.672E-16 | 2.0273   | up        | PREDICTED: thioredoxin-like protein CITRX1, chloroplastic [Sesamum indicum]                                          |
| c25983.graph_c0 | 12.9533551    | 7.0480859     | 8.0810464     | 0              | 0              | 0              | 3.613E-26 | -Inf     | down      | ats1, partial [Pyramimonas parkeae]                                                                                  |
| c25990.graph_c0 | 109.405698    | 118.806256    | 113.26768     | 29.9976985     | 29.2882042     | 35.213788      | 4.5E-193  | -2.94331 | down      | PREDICTED: espin-like [Sesamum indicum]                                                                              |
| c25994.graph_c0 | 1.67740909    | 1.4815489     | 1.33136114    | 0.25099761     | 0.3237533      | 0.29258857     | 4.969E-17 | -3.46013 | down      | PREDICTED: pathogenesis-related genes transcriptional activator PTI6-like [Nicotiana tomentosiformis]                |
| c25999.graph_c0 | 5.2469955     | 5.07599959    | 4.57048519    | 20.0399974     | 29.6255607     | 26.4396326     | 2.711E-06 | 1.26445  | up        | PREDICTED: glutamate decarboxylase [Sesamum indicum]                                                                 |
| c26000.graph_c0 | 2.08330899    | 1.25123707    | 0.96376843    | 5.75372049     | 7.21841324     | 5.97993327     | 0.0042463 | 1.05814  | up        | PREDICTED: uncharacterized protein LOC105169481 [Sesamum indicum]                                                    |
| c26003.graph_c0 | 0.27318352    | 0.41018561    | 0.35105164    | 6.40317981     | 5.96074143     | 6.11601789     | 5.826E-13 | 3.06668  | up        | PREDICTED: uncharacterized protein LOC105170399 [Sesamum indicum]                                                    |
| c26004.graph_c0 | 3.00873073    | 1.28369396    | 2.47192109    | 10.1449847     | 10.1309916     | 9.97482196     | 1.829E-05 | 1.07125  | up        | unnamed protein product [Vitis vinifera]                                                                             |
| c26005.graph_c0 | 5.20278063    | 2.25036624    | 3.30161931    | 0              | 0              | 0              | 3.212E-14 | -Inf     | down      | uncharacterized protein LOC100273290 [Zea mays]                                                                      |
| c26009.graph_c0 | 177.484823    | 173.577147    | 170.383878    | 862.653706     | 913.495574     | 909.96749      | 1.81E-58  | 1.27493  | up        | PREDICTED: 40S ribosomal protein S20-2-like [Glycine max]                                                            |
| c26010.graph_c0 | 24.0990123    | 22.6988992    | 22.8547491    | 19.3893247     | 18.498791      | 20.0406054     | 3.761E-23 | -1.3556  | down      | PREDICTED: uncharacterized protein LOC105158897 [Sesamum indicum]                                                    |
| c26011.graph_c0 | 38.663364     | 40.9215536    | 34.1911078    | 12.1616934     | 12.2085436     | 12.6564947     | 1.077E-97 | -2.70817 | down      | PREDICTED: LOW QUALITY PROTEIN: benzyl alcohol O-benzoyltransferase-like [Sesamum indicum]                           |



| #ID             | 0 h-1<br>FPKM | 0 h-2<br>FPKM | 0 h-3<br>FPKM | 28 h-1<br>FPKM | 28 h-2<br>FPKM | 28 h-3<br>FPKM | FDR       | log2FC   | regulated | nr_annotation                                                                     |
|-----------------|---------------|---------------|---------------|----------------|----------------|----------------|-----------|----------|-----------|-----------------------------------------------------------------------------------|
| c26016.graph_c0 | 0.94593453    | 0.69623657    | 1.21556332    | 5.90440974     | 7.68631869     | 6.53393237     | 3.354E-12 | 1.72049  | up        | PREDICTED: probable aminotransferase ACSTO [Sesamum indicum]                      |
| c26017.graph_c0 | 17.4103225    | 14.6648193    | 16.6432948    | 121.90781      | 135.568856     | 127.303811     | 2.264E-37 | 1.89093  | up        | PREDICTED: 60S ribosomal protein L34-like [Sesamum indicum]                       |
| c26029.graph_c0 | 42.8225006    | 37.366942     | 36.8778111    | 31.5712548     | 31.9265889     | 29.5846176     | 1E-50     | -1.42002 | down      | PREDICTED: abscisic acid receptor PYL9-like [Sesamum indicum]                     |
| c26034.graph_c0 | 1.68880236    | 1.37352592    | 1.28854312    | 0              | 0              | 0.06259738     | 9.631E-30 | -7.19221 | down      | -                                                                                 |
| c26035.graph_c0 | 0.09157801    | 0             | 0.11768136    | 40.6893488     | 38.1809701     | 40.7333134     | 4.77E-269 | 8.05956  | up        | PREDICTED: polyphenol oxidase 1, chloroplastic-like [Sesamum indicum]             |
| c26038.graph_c0 | 0.58814789    | 0.5352153     | 0.27483394    | 3.39379315     | 3.68414985     | 3.78401559     | 6.313E-13 | 1.87604  | up        | PREDICTED: DNA mismatch repair protein MSH2-like isoform X1 [Sesamum indicum]     |
| c26039.graph_c0 | 0.398227      | 0             | 0.12793436    | 10.6365189     | 9.27712018     | 8.44314083     | 4.115E-19 | 4.67486  | up        | PREDICTED: uncharacterized protein LOC105177716 [Sesamum indicum]                 |
| c26045.graph_c0 | 0.11283371    | 0.02823667    | 0.07249789    | 2.56271538     | 2.38793625     | 2.32536417     | 4.969E-16 | 4.00368  | up        | PREDICTED: uncharacterized protein LOC105165819 [Sesamum indicum]                 |
| c26046.graph_c0 | 2.1382737     | 2.48288123    | 1.53874916    | 1.20182573     | 1.49673925     | 1.11594619     | 1.137E-07 | -1.77864 | down      | PREDICTED: uncharacterized protein LOC104242602 [Nicotiana sylvestris]            |
| c26048.graph_c0 | 1.43467578    | 2.20203899    | 1.78216134    | 15.3974113     | 13.6199769     | 14.1240466     | 1.16E-19  | 1.90112  | up        | PREDICTED: uncharacterized protein LOC105164113 [Sesamum indicum]                 |
| c26049.graph_c0 | 1.23404064    | 1.28278697    | 0.97587143    | 31.0808137     | 32.392434      | 30.2032115     | 1.529E-89 | 3.65754  | up        | PREDICTED: LOW QUALITY PROTEIN: plasma membrane ATPase 3 [Sesamum indicum]        |
| c26053.graph_c0 | 7.23232055    | 8.49084506    | 7.74484854    | 4.60746952     | 4.45307869     | 4.34213966     | 2.6E-27   | -1.8993  | down      | -                                                                                 |
| c26054.graph_c0 | 1.75640471    | 2.05119073    | 2.91535572    | 0.85102988     | 0.72037518     | 0.30381463     | 2.589E-07 | -2.94263 | down      | PREDICTED: solute carrier family 40 member 2 isoform X2 [Sesamum indicum]         |
| c26056.graph_c0 | 10.7537969    | 12.8011046    | 9.33719918    | 6.75960875     | 4.38674179     | 5.17104894     | 1.082E-09 | -2.09956 | down      | PREDICTED: ubiquitin-activating enzyme E1 1-like isoform X1 [Sesamum indicum]     |
| c26057.graph_c0 | 120.065047    | 116.530154    | 120.726648    | 36.254455      | 32.3688534     | 33.4005443     | 0         | -2.89905 | down      | hypothetical protein MIMGU_mgv1a015990mg [Erythranthe guttata]                    |
| c26058.graph_c0 | 6.13329594    | 5.28936155    | 7.33588386    | 28.5632121     | 31.7961943     | 30.3862902     | 6.973E-19 | 1.1807   | up        | hypothetical protein MIMGU_mgv1a00722mg [Erythranthe guttata]                     |
| c26065.graph_c0 | 143.336503    | 154.010305    | 146.326241    | 141.356608     | 142.571223     | 138.62698      | 1.66E-42  | -1.16109 | down      | PREDICTED: DEAD-box ATP-dependent RNA helicase 3, chloroplastic [Sesamum indicum] |
| c26066.graph_c0 | 1.8247941     | 2.61538967    | 1.9718752     | 0.48227267     | 1.03418663     | 0.95923074     | 4.361E-12 | -2.46277 | down      | PREDICTED: origin of replication complex subunit 6 [Sesamum indicum]              |
| c26067.graph_c0 | 1.53308309    | 0.86739292    | 1.3704852     | 7.1214211      | 6.91113019     | 7.6689671      | 4.994E-06 | 1.43487  | up        | PREDICTED: probable glutathione peroxidase 2 [Sesamum indicum]                    |
| c26072.graph_c0 | 0             | 0             | 0             | 3.61177692     | 2.68134554     | 4.51901006     | 1.165E-10 | Inf      | up        | PREDICTED: uncharacterized protein LOC105161043 [Sesamum indicum]                 |
| c26073.graph_c0 | 7.93912324    | 11.6185279    | 9.54581304    | 132.341331     | 131.648171     | 118.810417     | 7.58E-129 | 2.62519  | up        | -                                                                                 |
| c26074.graph_c0 | 2292.59361    | 2294.71831    | 2444.78119    | 1242.65302     | 1420.56001     | 1543.22814     | 1.308E-49 | -1.83216 | down      | PREDICTED: embryonic protein DC-8 [Nicotiana sylvestris]                          |
| c26075.graph_c0 | 0.7340472     | 1.10217335    | 1.13193565    | 5.17496233     | 4.33531465     | 5.83345792     | 0.0004598 | 1.27634  | up        | -                                                                                 |
| c26076.graph_c0 | 8.36624157    | 9.43246572    | 8.31784154    | 9.31282117     | 7.33946909     | 6.94633499     | 5.987E-16 | -1.23699 | down      | -                                                                                 |

| #ID             | 0 h-1<br>FPKM | 0 h-2<br>FPKM | 0 h-3<br>FPKM | 28 h-1<br>FPKM | 28 h-2<br>FPKM | 28 h-3<br>FPKM | FDR       | log2FC   | regulated | nr_annotation                                                                          |
|-----------------|---------------|---------------|---------------|----------------|----------------|----------------|-----------|----------|-----------|----------------------------------------------------------------------------------------|
| c26079.graph_c0 | 0             | 0             | 0             | 2.80666391     | 2.75841581     | 2.5131561      | 1.459E-21 | Inf      | up        | PREDICTED: putative E3 ubiquitin-protein ligase XBAT31 [Sesamum indicum]               |
| c26082.graph_c0 | 1.18204939    | 1.38723873    | 1.414223      | 12.6792296     | 12.2238484     | 12.6184327     | 1.085E-23 | 2.14327  | up        | PREDICTED: uncharacterized protein LOC105156132 [Sesamum indicum]                      |
| c26084.graph_c0 | 7.69898482    | 3.51334588    | 4.75275995    | 0              | 0              | 0              | 1.758E-18 | -Inf     | down      | NADH dehydrogenase subunit 4 (mitochondrion) [Saccharina laticornis]                   |
| c26086.graph_c0 | 0.39647589    | 0.46690929    | 0.29969836    | 17.8656962     | 17.6615086     | 17.5105123     | 9.61E-122 | 4.42427  | up        | PREDICTED: protein FAR1-RELATED SEQUENCE 6 isoform X1 [Sesamum indicum]                |
| c26089.graph_c1 | 0             | 0.04730302    | 0             | 17.3786555     | 19.0714374     | 16.9553533     | 1.143E-84 | 9.05874  | up        | Phosphoenolpyruvate carboxylase family protein [1 neobroma cacao]                      |
| c26091.graph_c0 | 1.50137122    | 1.42773089    | 1.35052502    | 0              | 0.29557212     | 0.08904005     | 3.302E-19 | -4.56959 | down      | PREDICTED: uncharacterized protein LOC105162488 [Sesamum indicum]                      |
| c26092.graph_c0 | 1.28159516    | 0.85525232    | 0.90030562    | 6.39599769     | 7.52430245     | 6.94188561     | 1.105E-21 | 1.69319  | up        | PREDICTED: receptor-like protein kinase THESEUS 1 [Sesamum indicum]                    |
| c26096.graph_c0 | 0.13697373    | 0             | 0             | 4.03184454     | 2.92129067     | 2.96501867     | 2.271E-13 | 5.11877  | up        | PREDICTED: thylakoid lumenal 16.5 kDa protein, chloroplastic [Sesamum indicum]         |
| c26098.graph_c0 | 12.8006086    | 18.9150582    | 14.2952153    | 13.5120934     | 14.7001849     | 16.4482617     | 0.0001128 | -1.13297 | down      | PREDICTED: UDP-glycosyltransferase 13C5 isoform X2 [Vitis vinifera]                    |
| c26103.graph_c0 | 2.67710326    | 1.67486499    | 2.04260906    | 11.8262274     | 12.5720111     | 12.8998833     | 2.021E-13 | 1.45645  | up        | hypothetical protein MIMGU_mgv1a009994mg [Erythranthe outtata]                         |
| c26109.graph_c0 | 1.58095082    | 1.2308597     | 1.42963346    | 0.97879988     | 0.88376452     | 0.86814425     | 7.721E-06 | -1.72537 | down      | PREDICTED: uncharacterized protein LOC105156347 [Sesamum indicum]                      |
| c26113.graph_c0 | 7.98137312    | 8.09660506    | 8.09955772    | 49.3264017     | 48.5678362     | 47.2600596     | 1.341E-67 | 1.49499  | up        | PREDICTED: uncharacterized protein LOC105163882 [Sesamum indicum]                      |
| c26115.graph_c0 | 1.88605357    | 1.61823615    | 1.21182676    | 19.8762066     | 23.9579365     | 23.4493809     | 4.506E-34 | 2.74945  | up        | PREDICTED: macrophage migration inhibitory factor homolog isoform X2 [Sesamum indicum] |
| c26117.graph_c0 | 12.9357711    | 14.4314026    | 15.1637089    | 13.6718561     | 14.515205      | 15.1969234     | 3.118E-13 | -1.06338 | down      | PREDICTED: uncharacterized protein LOC105176303 [Sesamum indicum]                      |
| c26118.graph_c0 | 3.40203987    | 2.12840406    | 1.40520726    | 0              | 0              | 0              | 1.573E-12 | -Inf     | down      | hypothetical protein AALP_AA60 / 54U000100, partial [Arabis alvina]                    |
| c26120.graph_c0 | 5.39038939    | 6.62210229    | 6.8219113     | 3.02731668     | 2.81377675     | 3.2694693      | 8.391E-19 | -2.14016 | down      | PREDICTED: cytochrome P450 76C1-like [Sesamum indicum]                                 |
| c26125.graph_c0 | 0             | 0             | 0.05845085    | 1.95046345     | 1.94017907     | 1.64551351     | 2.253E-13 | 5.43457  | up        | PREDICTED: cytochrome P450 90B1 [Sesamum indicum]                                      |
| c26131.graph_c0 | 0.73867046    | 1.30484139    | 1.11673033    | 0.85266227     | 0.94095722     | 0.79884181     | 0.0007565 | -1.38012 | down      | hypothetical protein L484_013769 [Morus notabilis]                                     |
| c26134.graph_c0 | 0.12996492    | 0.28620913    | 0.46762818    | 10.1258711     | 9.22799872     | 9.41877947     | 1.78E-56  | 3.92052  | up        | PREDICTED: probable methyltransferase PM12 [Sesamum indicum]                           |
| c26136.graph_c0 | 1.19146389    | 0.62225581    | 0.73225483    | 43.5610042     | 49.1558796     | 41.4747813     | 3.02E-109 | 4.63402  | up        | PREDICTED: uncharacterized protein LOC105162013 [Sesamum indicum]                      |
| c26138.graph_c0 | 0             | 0.09086078    | 0.07776193    | 1.91315981     | 2.89886178     | 2.51215161     | 2.543E-15 | 4.3364   | up        | PREDICTED: glycerol-3-phosphate 2-O-acyltransferase 6-like [Sesamum indicum]           |
| c26142.graph_c0 | 0.07748707    | 0.19391165    | 0             | 6.39199715     | 6.68665812     | 5.23879464     | 8.73E-30  | 5.00039  | up        | PREDICTED: uncharacterized protein LOC105156886 [Sesamum indicum]                      |

| #ID             | 0 h-1<br>FPKM | 0 h-2<br>FPKM | 0 h-3<br>FPKM | 28 h-1<br>FPKM | 28 h-2<br>FPKM | 28 h-3<br>FPKM | FDR       | log2FC   | regulated | nr_annotation                                                                                 |
|-----------------|---------------|---------------|---------------|----------------|----------------|----------------|-----------|----------|-----------|-----------------------------------------------------------------------------------------------|
| c26151.graph_c0 | 0.2931574     | 0.16302831    | 0.37671886    | 1.37308625     | 1.73140034     | 1.27496885     | 0.0015795 | 1.29744  | up        | PREDICTED: pentatricopeptide repeat-containing protein At2g13600-like [Sesamum indicum]       |
| c26155.graph_c0 | 60.6819133    | 63.1452779    | 53.3829576    | 8.9458955      | 10.1774042     | 8.43124322     | 1.18E-176 | -3.77458 | down      | hypothetical protein MIMGU_mgv1a00178/mg [Erythranthe guttata]                                |
| c26158.graph_c0 | 3.04919887    | 2.84876871    | 3.2652844     | 0.36935669     | 0.13339779     | 0.48222727     | 2.445E-21 | -4.30536 | down      | PREDICTED: shikimate O-hydroxycinnamoyltransferase-like [Sesamum indicum]                     |
| c26159.graph_c0 | 6.53295605    | 2.61579913    | 4.4773905     | 0              | 0              | 0              | 1.279E-11 | -Inf     | down      | metallothionein type 2a-FL [Elaeis guineensis]                                                |
| c26161.graph_c0 | 9.63539728    | 10.0232828    | 12.381867     | 6.59101291     | 7.43883336     | 8.06731906     | 4.547E-08 | -1.62934 | down      | hypothetical protein MIMGU_mgv1a020481mg, partial [Erythranthe guttata]                       |
| c26161.graph_c1 | 22.6554834    | 22.6515206    | 24.1526609    | 15.5758275     | 21.9775129     | 20.4619049     | 1.014E-23 | -1.35104 | down      | PREDICTED: beta-galactosidase 15-like [Sesamum indicum]                                       |
| c26163.graph_c0 | 0.1018095     | 0.10191145    | 0.13082924    | 4.4396736      | 4.60990035     | 3.47179001     | 5.546E-16 | 4.13075  | up        | PREDICTED: hyoscyamine 6-dioxygenase-like [Sesamum indicum]                                   |
| c26164.graph_c0 | 0.82453564    | 1.78828279    | 1.94252839    | 8.83919932     | 8.02605845     | 8.23145944     | 2.49E-06  | 1.36333  | up        | PREDICTED: uncharacterized protein LOC104422511 isoform X2 [Eucalyptus grandis]               |
| c26166.graph_c0 | 5.00892175    | 4.23445976    | 4.38125785    | 25.4678922     | 24.2242873     | 23.4775824     | 2.835E-36 | 1.3356   | up        | PREDICTED: kinesin-13A [Sesamum indicum]                                                      |
| c26171.graph_c0 | 1.54884731    | 2.08707456    | 1.07171622    | 1.42876457     | 0.97730337     | 1.20118932     | 0.0011283 | -1.46922 | down      | PREDICTED: peroxidase 11 [Sesamum indicum]                                                    |
| c26174.graph_c0 | 0.70239315    | 0.31248733    | 0.75216917    | 10.181545      | 9.32101646     | 9.25688866     | 2.556E-28 | 2.93082  | up        | hypothetical protein L484_002404 [Morus notabilis]                                            |
| c26175.graph_c0 | 4.80588221    | 2.61151991    | 2.8231995     | 0              | 0              | 0              | 2.935E-15 | -Inf     | down      | PREDICTED: protein translation factor SUI1 homolog 2-like [Tarenaya hassleriana]              |
| c26185.graph_c0 | 0             | 0             | 0             | 3.42676344     | 3.36309358     | 2.73542379     | 3.583E-14 | Inf      | up        | PREDICTED: probable receptor-like serine/threonine-protein kinase At4g34500 [Sesamum indicum] |
| c26189.graph_c0 | 0.22273528    | 0.22295831    | 0.28622365    | 5.08311728     | 5.32040289     | 4.70258108     | 2.079E-16 | 3.27276  | up        | PREDICTED: calcium-dependent protein kinase 15 [Sesamum indicum]                              |
| c26189.graph_c1 | 0.74588258    | 0.44797768    | 0.28754659    | 7.31839263     | 9.78936648     | 7.21033352     | 7.228E-14 | 2.95605  | up        | PREDICTED: calcium-dependent protein kinase 15 [Sesamum indicum]                              |
| c26190.graph_c0 | 1.44332529    | 1.6098872     | 1.11283809    | 12.8277776     | 13.0706576     | 12.7418119     | 3.699E-23 | 2.12625  | up        | PREDICTED: RING-H2 finger protein ATL65 [Sesamum indicum]                                     |
| c26191.graph_c0 | 1.52214548    | 1.93921596    | 1.24473823    | 1.55885834     | 0.9080664      | 1.18995015     | 0.0001016 | -1.451   | down      | hypothetical protein MIMGU_mgv1a008195mg [Erythranthe guttata]                                |
| c26193.graph_c0 | 0.1512023     | 0.1513537     | 0.19430094    | 2.96710988     | 5.25882101     | 3.04883973     | 3.664E-05 | 3.40818  | up        | PREDICTED: GATA transcription factor 2-like [Sesamum indicum]                                 |
| c26199.graph_c0 | 3.26428577    | 2.33396747    | 3.14605234    | 23.6963972     | 25.9858663     | 27.6789225     | 2.397E-38 | 2.05469  | up        | hypothetical protein MIMGU_mgv1a007645mg [Erythranthe guttata]                                |
| c26203.graph_c0 | 2.11657411    | 1.78575599    | 1.94277252    | 1.79103686     | 2.00406103     | 1.72148784     | 5.757E-10 | -1.17387 | down      | PREDICTED: receptor-like protein kinase isoform X1 [Sesamum indicum]                          |
| c26206.graph_c0 | 1.59242128    | 1.34232914    | 0.96931155    | 6.39595126     | 7.75492522     | 6.31255798     | 0.0003216 | 1.30459  | up        | hypothetical protein MIMGU_mgv1a006425mg [Erythranthe guttata]                                |
| c26207.graph_c0 | 5.82380999    | 4.84711778    | 6.39068323    | 37.0956741     | 38.0885939     | 37.5655572     | 2.137E-29 | 1.63188  | up        | PREDICTED: transport and Golgi organization 2 homolog [Sesamum indicum]                       |
| c26208.graph_c0 | 2.09529116    | 2.85244942    | 2.69253209    | 0.24365529     | 0.71499311     | 0.34793627     | 9.661E-18 | -3.64307 | down      | -                                                                                             |
| c26211.graph_c0 | 4.0661284     | 4.92708423    | 4.05635557    | 1.39984991     | 1.72035354     | 1.90377682     | 1.626E-20 | -2.46622 | down      | hypothetical protein MIMGU_mgv1a015710mg [Erythranthe guttata]                                |
| c26213.graph_c0 | 17.5979997    | 17.4408633    | 14.8517377    | 11.4451315     | 11.7315896     | 12.5281064     | 3.881E-48 | -1.57066 | down      | PREDICTED: myb-related protein 3R-1-like isoform X1 [Sesamum indicum]                         |

| #ID             | 0 h-1<br>FPKM | 0 h-2<br>FPKM | 0 h-3<br>FPKM | 28 h-1<br>FPKM | 28 h-2<br>FPKM | 28 h-3<br>FPKM | FDR       | log2FC   | regulated | nr_annotation                                                                               |
|-----------------|---------------|---------------|---------------|----------------|----------------|----------------|-----------|----------|-----------|---------------------------------------------------------------------------------------------|
| c26214.graph_c0 | 0             | 0             | 0             | 5.74066323     | 4.89926528     | 3.6576309      | 2.807E-15 | Inf      | up        | hypothetical protein MIMGU_mgv1a024317mg, partial [Erythranthe guttata]                     |
| c26221.graph_c0 | 29.8270016    | 31.4896663    | 27.8483253    | 28.791217      | 30.430342      | 28.606667      | 3.009E-09 | -1.1115  | down      | putative phosphoprotein phosphatase [Arabidopsis thaliana]                                  |
| c26223.graph_c0 | 8.71151389    | 6.51901224    | 7.93406542    | 47.0865263     | 50.7845528     | 46.5480693     | 1.294E-26 | 1.54992  | up        | PREDICTED: UPR058 / protein CORT125 homolog [Sesamum indicum]                               |
| c26228.graph_c0 | 8.39223796    | 7.03591636    | 6.50176098    | 70.4186921     | 72.2697522     | 72.3204621     | 1.26E-120 | 2.20583  | up        | hypothetical protein MIMGU_mgv1a005159mg [Erythranthe guttata]                              |
| c26229.graph_c0 | 4.18597011    | 3.60672148    | 4.0173304     | 24.7751653     | 23.3084813     | 25.1080565     | 6.24E-52  | 1.54152  | up        | PREDICTED: uncharacterized protein LOC105163825 [Sesamum indicum]                           |
| c26231.graph_c0 | 0.67543264    | 0.72118291    | 0.6365023     | 5.53081284     | 6.17577121     | 6.03526729     | 1.34E-10  | 2.03586  | up        | PREDICTED: alpha-ketoglutarate-dependent dioxygenase alkB isoform X1 [Sesamum indicum]      |
| c26233.graph_c0 | 0             | 0.07126464    | 0             | 3.25980364     | 2.87321855     | 3.48329817     | 4.449E-21 | 5.99522  | up        | PREDICTED: uncharacterized protein LOC105176469 [Sesamum indicum]                           |
| c26234.graph_c0 | 0             | 0             | 0.04671307    | 2.35138322     | 3.17269047     | 2.69481672     | 1.663E-19 | 6.32841  | up        | PREDICTED: glucan endo-1,5-beta-glucosidase 12 [Sesamum indicum]                            |
| c26239.graph_c0 | 2.37674512    | 2.73599383    | 3.35963274    | 0              | 0.38992111     | 0.21143221     | 1.897E-21 | -4.91268 | down      | -                                                                                           |
| c26246.graph_c0 | 2.71421837    | 3.23444791    | 2.6574309     | 0.28181118     | 0.25444907     | 0.3066075      | 9.124E-20 | -4.44098 | down      | hypothetical protein MIMGU_mgv1a021151mg [Erythranthe guttata]                              |
| c26252.graph_c0 | 2.32820571    | 2.19543346    | 2.55823702    | 1.61855577     | 1.3064067      | 1.46080554     | 4.196E-11 | -1.78313 | down      | -                                                                                           |
| c26261.graph_c0 | 91.2087954    | 97.6281411    | 86.1395797    | 84.4406212     | 88.2014876     | 82.4132215     | 1.505E-50 | -1.19836 | down      | PREDICTED: beta-amylase 1, chloroplastic [Sesamum indicum]                                  |
| c26268.graph_c0 | 8.50817845    | 10.4591029    | 7.09708435    | 5.64126567     | 5.68124944     | 7.43598162     | 2.464E-08 | -1.56089 | down      | hypothetical protein MIMGU_mgv1a005615mg [Erythranthe guttata]                              |
| c26268.graph_c1 | 9.97669274    | 12.1755449    | 9.30799444    | 9.3369077      | 9.14782902     | 10.8609002     | 8.924E-07 | -1.18865 | down      | PREDICTED: patatin-like protein 6 [Sesamum indicum]                                         |
| c26270.graph_c0 | 11.7840835    | 11.4689767    | 10.3518062    | 49.2118583     | 48.7377616     | 47.7261636     | 3.732E-29 | 1.02698  | up        | hypothetical protein MIMGU_mgv1a02110mg [Erythranthe guttata]                               |
| c26274.graph_c0 | 14.6624301    | 13.7049104    | 13.2858868    | 11.6129285     | 12.130152      | 12.1702273     | 6.739E-33 | -1.30325 | down      | PREDICTED: protein FIZZY-RELATED 2-like [Sesamum indicum]                                   |
| c26278.graph_c0 | 119.257931    | 119.064571    | 113.767239    | 630.501497     | 689.647365     | 656.308473     | 7.272E-70 | 1.39886  | up        | PREDICTED: 60S acidic ribosomal protein P2A-like [Nicotiana tomentosiformis]                |
| c26279.graph_c0 | 93.3152559    | 90.7774661    | 100.535586    | 13.8759031     | 16.4324909     | 13.4148475     | 8.85E-135 | -3.79499 | down      | hypothetical protein MIMGU_mgv1a015010mg [Erythranthe guttata]                              |
| c26282.graph_c0 | 0.33015285    | 0.39658014    | 0.67881517    | 5.4709327      | 4.20311149     | 5.52155556     | 5.71E-09  | 2.33526  | up        | PREDICTED: inorganic pyrophosphatase 3 [Sesamum indicum]                                    |
| c26284.graph_c0 | 288.192432    | 294.360382    | 271.715883    | 38.9885245     | 43.9394886     | 47.3731445     | 0         | -3.802   | down      | PREDICTED: 18.2 kDa class 1 heat shock protein-like [Sesamum indicum]                       |
| c26286.graph_c0 | 0.1795195     | 0.14974938    | 0.07689656    | 1.06553553     | 1.82598606     | 2.2357756      | 0.0002322 | 2.57886  | up        | PREDICTED: mini-chromosome maintenance complex-binding protein isoform X1 [Sesamum indicum] |
| c26288.graph_c0 | 1.54517531    | 1.66883225    | 1.30632332    | 0              | 0.08005151     | 0.04823046     | 6.492E-33 | -6.228   | down      | hypothetical protein MIMGU_mgv1a008148mg [Erythranthe guttata]                              |
| c26291.graph_c0 | 16.7912953    | 15.6724262    | 15.5999343    | 12.3687331     | 12.2845869     | 10.0927852     | 7.946E-17 | -1.55878 | down      | PREDICTED: uncharacterized protein LOC105169169 isoform X2 [Sesamum indicum]                |
| c26292.graph_c0 | 0.41129652    | 0.09149075    | 0.11745162    | 2.09249558     | 2.09925257     | 1.73456183     | 6.968E-06 | 2.17934  | up        | PREDICTED: putative kinase-like protein TMKL1 [Sesamum indicum]                             |
| c26293.graph_c0 | 0.73942009    | 0.41120028    | 0.52788005    | 3.82155562     | 4.69053217     | 5.35967813     | 5.273E-06 | 1.96067  | up        | -                                                                                           |
| c26293.graph_c1 | 3.13299168    | 2.75099026    | 4.16728215    | 29.8811604     | 28.3144527     | 29.0115999     | 4.467E-37 | 2.02209  | up        | -                                                                                           |

| #ID             | 0 h-1<br>FPKM | 0 h-2<br>FPKM | 0 h-3<br>FPKM | 28 h-1<br>FPKM | 28 h-2<br>FPKM | 28 h-3<br>FPKM | FDR       | log2FC   | regulated | nr_annotation                                                                                      |
|-----------------|---------------|---------------|---------------|----------------|----------------|----------------|-----------|----------|-----------|----------------------------------------------------------------------------------------------------|
| c26296.graph_c0 | 3.88331017    | 2.8120161     | 2.65436559    | 0.18015111     | 0.10843971     | 0.09800123     | 3.54E-31  | -5.68354 | down      | -                                                                                                  |
| c26297.graph_c0 | 0.0200172     | 0             | 0             | 2.86603199     | 3.42845119     | 3.33585328     | 5.887E-37 | 7.85144  | up        | O-Glycosyl hydrolases family 17 protein [Theobroma cacao]                                          |
| c26298.graph_c0 | 2.37951036    | 2.54068595    | 1.90260934    | 13.3357067     | 15.7537906     | 13.6728441     | 2.648E-13 | 1.55993  | up        | hypothetical protein MIMGU_mgv1a013638mg [Erythranthe<br>outtata]                                  |
| c26299.graph_c0 | 0.80123465    | 0.26734566    | 0.51480913    | 10.5790446     | 12.9695324     | 7.99884231     | 4.045E-10 | 3.22824  | up        | PREDICTED: cytochrome b561 and DOMON domain-containing<br>protein At3g25290-like [Sesamum indicum] |
| c26299.graph_c1 | 0.53625235    | 0.53678933    | 0             | 7.32720824     | 7.17882733     | 8.20514393     | 1.388E-11 | 3.33392  | up        | PREDICTED: cytochrome b561 and DOMON domain-containing<br>protein At3g25290-like [Sesamum indicum] |
| c26301.graph_c0 | 0             | 0             | 0.04240265    | 0.71946428     | 1.42913933     | 0.88061546     | 3.549E-06 | 5.02692  | up        | PREDICTED: adenine/guanine permease AZG2 [Sesamum<br>indicum]                                      |
| c26302.graph_c0 | 8.16585954    | 6.55582616    | 7.13767856    | 7.98349445     | 7.20834696     | 7.9156911      | 2.779E-10 | -1.00891 | down      | PREDICTED: upstream activation factor subunit spp27-like isoform<br>X2 [Sesamum indicum]           |
| c26306.graph_c0 | 96.3485699    | 94.7159539    | 90.9473592    | 9.03218456     | 9.32024664     | 10.3296469     | 0         | -4.38681 | down      | PREDICTED: uncharacterized protein LOC105172717 [Sesamum<br>indicum]                               |
| c26310.graph_c0 | 0.35862941    | 0.40386208    | 0.34563974    | 2.47617296     | 3.17712129     | 2.57884317     | 1.332E-05 | 1.80276  | up        | PREDICTED: uncharacterized protein LOC105176355 [Sesamum<br>indicum]                               |
| c26313.graph_c0 | 2.30470081    | 2.15816936    | 1.76742543    | 8.24013221     | 8.65974988     | 9.67797895     | 1.694E-06 | 1.00619  | up        | PREDICTED: uncharacterized protein LOC105171071 [Sesamum<br>indicum]                               |
| c26314.graph_c0 | 2.42770198    | 2.36618209    | 2.70920722    | 23.3556111     | 23.7291585     | 26.4841622     | 3.438E-30 | 2.20197  | up        | PREDICTED: galactokinase [Sesamum indicum]                                                         |
| c26316.graph_c0 | 0.47401167    | 0.91247369    | 0.98396915    | 72.4793828     | 79.0329848     | 74.3228749     | 0         | 5.47626  | up        | PREDICTED: uncharacterized protein LOC105167296 [Sesamum<br>indicum]                               |
| c26318.graph_c0 | 1.0357385     | 0.69118376    | 0.51759749    | 3.9729463      | 4.30463761     | 3.99264561     | 0.0003976 | 1.36782  | up        | PREDICTED: alpha-ketoglutarate-dependent dioxygenase alkB<br>homolog 2 [Sesamum indicum]           |
| c26329.graph_c0 | 11.5352725    | 9.4579508     | 11.9182166    | 9.35274799     | 9.16739524     | 8.73184036     | 1.041E-12 | -1.36406 | down      | PREDICTED: septum-promoting GTP-binding protein 1 [Sesamum<br>indicum]                             |
| c26333.graph_c0 | 0.06482693    | 0.03244592    | 0             | 23.6050353     | 23.1636753     | 25.6051291     | 5.11E-163 | 8.47315  | up        | 4-coumarate coenzyme A ligase [Paulownia fortunei]                                                 |
| c26334.graph_c0 | 5.24746078    | 4.54205384    | 4.20458032    | 27.9082198     | 27.6292299     | 29.4363265     | 3.041E-37 | 1.51449  | up        | PREDICTED: aspartate aminotransferase, chloroplastic [Nicotiana<br>sylvestris]                     |
| c26336.graph_c0 | 26.376128     | 26.8809132    | 27.3989322    | 1.64314438     | 1.94195493     | 2.34366151     | 0         | -4.85578 | down      | PREDICTED: uncharacterized protein LOC104091376 [Nicotiana<br>tomentosiformis]                     |
| c26336.graph_c1 | 13.9967733    | 13.7413507    | 15.2192682    | 14.6722704     | 11.3046908     | 13.0898818     | 2.349E-05 | -1.22844 | down      | -                                                                                                  |
| c26338.graph_c0 | 58.6710932    | 52.3582094    | 59.3021816    | 7.59305857     | 8.08169507     | 8.53471356     | 9.04E-132 | -3.90537 | down      | PREDICTED: uncharacterized protein LOC105158260 [Sesamum<br>indicum]                               |
| c26341.graph_c0 | 0.05422336    | 0             | 0             | 3.58623955     | 5.80000226     | 3.11928782     | 7.039E-10 | 6.78825  | up        | PREDICTED: transcription factor JUNGBRUNNEN 1-like<br>[Sesamum indicum]                            |
| c26342.graph_c0 | 1.49965636    | 1.47482194    | 1.58902696    | 0.7648713      | 1.15676684     | 0.85817701     | 7.913E-10 | -1.80745 | down      | PREDICTED: uncharacterized protein LOC105158927 [Sesamum<br>indicum]                               |
| c26348.graph_c0 | 0.34373531    | 0.17203975    | 0.7729986     | 6.68281455     | 6.14673917     | 7.10944423     | 4.489E-19 | 2.84706  | up        | hypothetical protein MIMGU_mgv1a0243/0mg [Erythranthe<br>outtata]                                  |

| #ID             | 0 h-1<br>FPKM | 0 h-2<br>FPKM | 0 h-3<br>FPKM | 28 h-1<br>FPKM | 28 h-2<br>FPKM | 28 h-3<br>FPKM | FDR       | log2FC   | regulated | nr_annotation                                                                          |
|-----------------|---------------|---------------|---------------|----------------|----------------|----------------|-----------|----------|-----------|----------------------------------------------------------------------------------------|
| c26349.graph_c0 | 2.01499525    | 1.85472457    | 1.36908091    | 10.8910695     | 10.1223916     | 11.2770426     | 5.406E-21 | 1.53835  | up        | PREDICTED: FACT complex subunit SPT16-like [Sesamum indicum]                           |
| c26358.graph_c0 | 60.6539279    | 63.2800719    | 57.594479     | 21.7310195     | 22.203847      | 21.2968955     | 2.61E-203 | -2.56646 | down      | PREDICTED: amidophosphoribosyltransferase, chloroplastic [Sesamum indicum]             |
| c26361.graph_c0 | 2.01996468    | 0.86656602    | 1.3596705     | 11.1855138     | 11.4250257     | 10.2681989     | 1.704E-08 | 1.86573  | up        | -                                                                                      |
| c26363.graph_c0 | 37.6848377    | 41.6316483    | 42.4045592    | 24.6927843     | 22.9359377     | 20.2649098     | 1.157E-32 | -1.93473 | down      | PREDICTED: protein phosphatase 2C 37-like [Sesamum indicum]                            |
| c26363.graph_c1 | 45.0172776    | 42.4791632    | 40.0152845    | 26.9665462     | 29.993146      | 27.9222245     | 1.008E-69 | -1.67644 | down      | PREDICTED: protein phosphatase 2C 37-like [Sesamum indicum]                            |
| c26364.graph_c0 | 0.77478315    | 1.24089436    | 0.73012648    | 146.595763     | 157.919495     | 144.556016     | 0         | 6.26486  | up        | PREDICTED: protein YLS3-like [Sesamum indicum]                                         |
| c26365.graph_c0 | 1.43056541    | 1.56931277    | 1.43541085    | 9.71361105     | 8.65474057     | 9.19302902     | 5.862E-22 | 1.54534  | up        | PREDICTED: mechanosensitive ion channel protein 10-like [Sesamum indicum]              |
| c26367.graph_c0 | 11.021348     | 12.1570448    | 10.3815202    | 0.93323327     | 0.98305917     | 0.76151073     | 3.78E-114 | -4.73821 | down      | PREDICTED: dehydration-responsive protein RD22 [Sesamum indicum]                       |
| c26371.graph_c0 | 22.0280349    | 21.665498     | 20.2975812    | 8.93572958     | 8.3762836      | 8.43077649     | 2.73E-99  | -2.40328 | down      | PREDICTED: uncharacterized protein LOC105176235 [Sesamum indicum]                      |
| c26381.graph_c0 | 77.2222938    | 80.5114303    | 71.957321     | 49.8238608     | 51.100521      | 50.2434749     | 4.099E-97 | -1.69309 | down      | PREDICTED: protein SDE2 homolog [Sesamum indicum]                                      |
| c26382.graph_c0 | 5.93040678    | 6.67838834    | 5.71560563    | 0              | 0              | 0              | 4.563E-36 | -Inf     | down      | PREDICTED: myb-related protein Myb4-like [Sesamum indicum]                             |
| c26384.graph_c0 | 17.7179454    | 18.4199344    | 15.7761563    | 14.3677289     | 13.4751131     | 13.5076762     | 1.895E-48 | -1.41723 | down      | PREDICTED: uncharacterized protein LOC105161020 isoform X2 [Sesamum indicum]           |
| c26387.graph_c0 | 3.18311774    | 3.71735601    | 3.18144736    | 26.819134      | 26.2653291     | 26.3938766     | 1.2E-51   | 1.88871  | up        | PREDICTED: serine carboxypeptidase-like 45 [Sesamum indicum]                           |
| c26388.graph_c0 | 1.31984395    | 1.72253233    | 1.48136164    | 0.20642196     | 0.26312425     | 0.3071528      | 5.458E-38 | -3.63214 | down      | PREDICTED: kinesin-like protein KCA1 [Sesamum indicum]                                 |
| c26390.graph_c0 | 5.64961927    | 8.58041953    | 7.059709      | 4.5308808      | 4.34664558     | 4.78320299     | 2.207E-07 | -1.73171 | down      | PREDICTED: uncharacterized protein LOC105171007 isoform X3 [Sesamum indicum]           |
| c26393.graph_c0 | 34.7435714    | 37.8765216    | 33.7678471    | 22.0977557     | 24.8705587     | 23.2323158     | 2.01E-84  | -1.68986 | down      | PREDICTED: uncharacterized protein LOC105156254 [Sesamum indicum]                      |
| c26394.graph_c0 | 7.63524136    | 8.10409559    | 7.52785588    | 47.5513269     | 49.1110676     | 47.3503146     | 2.393E-32 | 1.53951  | up        | hypothetical protein M569_01696, partial [Genlisea aurea]                              |
| c26398.graph_c0 | 0.07263453    | 0             | 0.15556375    | 14.4293649     | 14.3470882     | 11.5014261     | 3.544E-73 | 6.35467  | up        | PREDICTED: glycerophosphodiester phosphodiesterase GDPDL3-like [Sesamum indicum]       |
| c26401.graph_c0 | 8.38353329    | 9.46781635    | 8.19497714    | 6.1972593      | 6.20682202     | 6.11928965     | 5.22E-15  | -1.58169 | down      | PREDICTED: LOW QUALITY PROTEIN: uncharacterized protein LOC105173575 [Sesamum indicum] |
| c26404.graph_c0 | 0             | 0             | 0             | 1.44397798     | 1.86253819     | 2.31446726     | 3.823E-13 | Inf      | up        | --                                                                                     |
| c26407.graph_c0 | 0             | 0             | 0             | 2.27008375     | 1.53725459     | 1.66713282     | 1.244E-11 | Inf      | up        | PREDICTED: EPIDERMAL PATTERNING FACTOR-like protein 4 [Sesamum indicum]                |
| c26409.graph_c0 | 0.36403001    | 0.36439453    | 0.24948959    | 1.85202441     | 1.64035288     | 1.64077138     | 0.0006434 | 1.30605  | up        | PREDICTED: zinc finger CCCH domain-containing protein 31 isoform X1 [Sesamum indicum]  |
| c26413.graph_c0 | 0.1375434     | 0.51630423    | 0.22093589    | 11.1211897     | 12.027105      | 10.3187613     | 4.069E-51 | 4.16651  | up        | PREDICTED: protein WVD2-like 1 isoform X2 [Sesamum indicum]                            |
| c26418.graph_c0 | 31.8411698    | 33.9911999    | 33.8818287    | 35.2988409     | 33.1058497     | 35.5164302     | 6.537E-32 | -1.03132 | down      | PREDICTED: GATA transcription factor 15-like [Sesamum indicum]                         |

| #ID             | 0 h-1<br>FPKM | 0 h-2<br>FPKM | 0 h-3<br>FPKM | 28 h-1<br>FPKM | 28 h-2<br>FPKM | 28 h-3<br>FPKM | FDR       | log2FC   | regulated | nr_annotation                                                                                  |
|-----------------|---------------|---------------|---------------|----------------|----------------|----------------|-----------|----------|-----------|------------------------------------------------------------------------------------------------|
| c26420.graph_c0 | 0.05548801    | 0.44434855    | 0.07130428    | 3.5892243      | 3.71409852     | 3.68565286     | 7.908E-11 | 3.18046  | up        | PREDICTED: 3-ketoacyl-CoA synthase 11 [Sesamum indicum]                                        |
| c26422.graph_c0 | 285.842613    | 280.100125    | 294.371219    | 37.6878361     | 37.7565902     | 43.3936009     | 0         | -3.94619 | down      | hypothetical protein MIMGU_mgv1a006265mg [Erythranthe                                          |
| c26423.graph_c0 | 0.23799961    | 0.19059035    | 0.24467114    | 15.7754795     | 13.8377062     | 12.4774491     | 8.051E-53 | 4.87395  | up        | hypothetical protein MIMGU_mgv1a008823mg [Erythranthe                                          |
| c26429.graph_c0 | 7.54124191    | 7.95409766    | 6.79656388    | 4.81880525     | 4.36753593     | 4.02215395     | 4.106E-43 | -1.84463 | down      | PREDICTED: mitogen-activated protein kinase homolog NTF6 [Sesamum indicum]                     |
| c26438.graph_c0 | 7.36137478    | 9.13083753    | 8.2257896     | 3.43110957     | 4.72571733     | 3.98609527     | 1.014E-19 | -2.11717 | down      | PREDICTED: probable trehalose-phosphate phosphatase J [Nicotiana tomentosiformis]              |
| c26442.graph_c0 | 90.8368424    | 90.4089556    | 79.0126698    | 50.762646      | 54.167348      | 54.8705749     | 1.231E-96 | -1.79225 | down      | PREDICTED: uncharacterized protein At4g13200, chloroplastic-like [Sesamum indicum]             |
| c26444.graph_c0 | 34.0354039    | 39.1989703    | 32.0796162    | 3.01974389     | 3.15824866     | 2.48462041     | 5.58E-118 | -4.69417 | down      | PREDICTED: receptor-like protein kinase FERONIA [Sesamum indicum]                              |
| c26444.graph_c1 | 19.6387413    | 20.0094495    | 17.0604297    | 1.23799239     | 1.3150483      | 1.30730688     | 2.54E-211 | -4.96537 | down      | PREDICTED: receptor-like protein kinase FERONIA [Sesamum indicum]                              |
| c26447.graph_c0 | 122.9693      | 111.146755    | 119.45988     | 14.5813106     | 17.9323958     | 15.5907847     | 0         | -3.96861 | down      | PREDICTED: uncharacterized protein LOC105156412 [Sesamum indicum]                              |
| c26450.graph_c0 | 1.74992952    | 2.00192207    | 2.64136389    | 32.9264905     | 31.8804136     | 30.4588994     | 7.34E-110 | 2.80129  | up        | PREDICTED: coatomer subunit alpha-1-like [Sesamum indicum]                                     |
| c26452.graph_c0 | 0             | 0.07097769    | 0             | 9.17315343     | 7.84045408     | 7.94778796     | 3.994E-51 | 7.37627  | up        | PREDICTED: subtilisin-like protease [Sesamum indicum]                                          |
| c26453.graph_c0 | 6.83268368    | 5.57294677    | 5.04052482    | 30.1635792     | 31.2204767     | 28.5528526     | 2.082E-16 | 1.27857  | up        | PREDICTED: DAG protein, chloroplastic [Sesamum indicum]                                        |
| c26454.graph_c0 | 9.03314413    | 4.63702024    | 5.45672762    | 0              | 0              | 0              | 2.483E-19 | -Inf     | down      | hypothetical protein SNOG_05978 [Phaeosphaeria nodorum SN15]                                   |
| c26459.graph_c0 | 0.70506285    | 0.84692263    | 0.96643592    | 9.36049055     | 12.6157772     | 9.92393376     | 1.396E-17 | 2.568    | up        | hypothetical protein MIMGU_mgv1a021565mg [Erythranthe                                          |
| c26464.graph_c0 | 19.0647235    | 22.1372242    | 18.1292041    | 181.584599     | 189.788644     | 197.467846     | 1.24E-108 | 2.17197  | up        | PREDICTED: 60S ribosomal protein L12 [Sesamum indicum]                                         |
| c26468.graph_c0 | 2.01543682    | 1.21420901    | 1.82253356    | 0              | 0              | 0              | 1.678E-32 | -Inf     | down      | PREDICTED: uncharacterized protein LOC104812256 [Tarenaya hassleriana]                         |
| c26470.graph_c0 | 0             | 0             | 0             | 5.31014859     | 5.36341315     | 4.75532548     | 8.673E-40 | Inf      | up        | PREDICTED: tyrosine decarboxylase 1-like [Setaria italica]                                     |
| c26474.graph_c0 | 0.18175733    | 0.07277573    | 0.04671307    | 0.89828123     | 0.73949928     | 0.97013402     | 2.859E-05 | 2.03921  | up        | PREDICTED: acetylnithine deacetylase [Sesamum indicum]                                         |
| c26475.graph_c0 | 6.21392652    | 3.52784561    | 4.05216141    | 0              | 0              | 0              | 3.877E-22 | -Inf     | down      | predicted protein [Hordeum vulgare subsp. vulgare]                                             |
| c26481.graph_c0 | 1.11494777    | 0.98476255    | 0.80065555    | 19.7897157     | 19.5611156     | 19.4608734     | 1.25E-178 | 3.25517  | up        | PREDICTED: LOW QUALITY PROTEIN: UDP-glucose:glycoprotein glucosyltransferase [Sesamum indicum] |
| c26482.graph_c0 | 2.62904921    | 2.6316818     | 1.68921616    | 1.13452433     | 1.18611158     | 0.68214085     | 7.658E-10 | -2.29815 | down      | -                                                                                              |
| c26483.graph_c0 | 4.86044051    | 6.25539537    | 5.71049919    | 3.83532931     | 5.19441415     | 4.61203827     | 1.47E-08  | -1.3947  | down      | -                                                                                              |
| c26487.graph_c0 | 189.426176    | 201.646716    | 189.169362    | 132.39502      | 134.236355     | 137.134416     | 1.45E-77  | -1.61336 | down      | hypothetical protein H632_c16p1 [Helicospodium sp. ATCC 50970]                                 |
| c26488.graph_c0 | 11.5626991    | 11.3112256    | 9.79311945    | 11.6505883     | 10.0020419     | 9.74055831     | 2.736E-12 | -1.14618 | down      | PREDICTED: mechanosensitive ion channel protein 2, chloroplastic-like [Sesamum indicum]        |
| c26490.graph_c0 | 2.19642595    | 2.5983754     | 3.25014496    | 39.279878      | 42.8475273     | 41.2097911     | 1.269E-65 | 2.84296  | up        | PREDICTED: 50S ribosomal protein L21, chloroplastic [Sesamum indicum]                          |

| #ID             | 0 h-1<br>FPKM | 0 h-2<br>FPKM | 0 h-3<br>FPKM | 28 h-1<br>FPKM | 28 h-2<br>FPKM | 28 h-3<br>FPKM | FDR       | log2FC   | regulated | nr_annotation                                                                                               |
|-----------------|---------------|---------------|---------------|----------------|----------------|----------------|-----------|----------|-----------|-------------------------------------------------------------------------------------------------------------|
| c26491.graph_c0 | 3.08618573    | 2.87172143    | 1.95500676    | 28.6222245     | 29.2090745     | 26.6293962     | 2.553E-51 | 2.33055  | up        | hypothetical protein MIMGU_mgv1a006583mg [Erythranthe<br>cuttata]                                           |
| c26496.graph_c0 | 317.258495    | 348.859207    | 361.694843    | 15.2394521     | 16.5643409     | 17.5440252     | 6.93E-171 | -5.47205 | down      | PREDICTED: methionine gamma-lyase [Sesamum indicum]                                                         |
| c26498.graph_c0 | 1.85233419    | 1.66237636    | 0.82080095    | 14.9017698     | 15.047693      | 15.5689905     | 1.359E-19 | 2.31101  | up        | PREDICTED: uncharacterized protein LOC105161253 [Sesamum<br>indicum]                                        |
| c26502.graph_c0 | 34.216199     | 34.344556     | 31.5676095    | 17.9223656     | 17.8271678     | 16.5942593     | 8.12E-114 | -2.02558 | down      | PREDICTED: uncharacterized protein LOC105166690 [Sesamum<br>indicum]                                        |
| c26504.graph_c0 | 0.2132239     | 0             | 0.06850029    | 1.70466895     | 1.15436718     | 1.13808759     | 1.277E-05 | 2.74938  | up        | clathrin heavy chain 1, partial [Nicotiana tabacum]                                                         |
| c26507.graph_c0 | 62.246062     | 63.0164419    | 60.9004526    | 24.7406683     | 25.7037849     | 24.9074988     | 4.23E-123 | -2.39517 | down      | hypothetical protein MIMGU_mgv1a002/02mg [Erythranthe<br>cuttata]                                           |
| c26512.graph_c0 | 78.9197461    | 79.4784248    | 69.0262374    | 46.1792717     | 47.8901407     | 43.9906444     | 3.867E-96 | -1.80922 | down      | PREDICTED: PKA1 family protein F2-like [Nicotiana<br>tomentosiformis]                                       |
| c26516.graph_c0 | 16.5811142    | 14.2475983    | 16.4048033    | 15.1971309     | 14.7326485     | 16.4908016     | 6.082E-14 | -1.11538 | down      | PREDICTED: zinc finger A20 and AN1 domain-containing stress-<br>associated protein 8-like [Sesamum indicum] |
| c26519.graph_c0 | 0.28693327    | 0.31594265    | 0.25810443    | 2.39822666     | 2.59844858     | 2.1441183      | 2.872E-07 | 1.96234  | up        | PREDICTED: uncharacterized protein LOC105156252 [Sesamum<br>indicum]                                        |
| c26520.graph_c0 | 5.38868501    | 4.34157736    | 3.37788955    | 3.15227687     | 3.88119608     | 3.58553577     | 4.051E-05 | -1.38899 | down      | -                                                                                                           |
| c26523.graph_c0 | 1.0424481     | 0.52174598    | 0.37210752    | 4.50378024     | 3.61043619     | 3.19420051     | 0.0004998 | 1.46616  | up        | PREDICTED: epidermal growth factor receptor substrate 15-like<br>[Sesamum indicum]                          |
| c26525.graph_c0 | 0.34799442    | 0.5515429     | 0.52171771    | 1.83367247     | 2.47393633     | 2.52816642     | 0.0006478 | 1.17229  | up        | PREDICTED: probable receptor-like protein kinase At5g15080<br>[Sesamum indicum]                             |
| c26527.graph_c0 | 17.0549249    | 18.6817699    | 18.8164362    | 4.67519606     | 3.91577751     | 4.26668886     | 2.36E-111 | -3.17649 | down      | PREDICTED: F-box/keich-repeat protein SKIP25-like [Sesamum<br>indicum]                                      |
| c26529.graph_c0 | 0             | 0             | 0.03575775    | 3.53918453     | 3.72510038     | 3.45728354     | 3.856E-56 | 7.09759  | up        | PREDICTED: protein STICHEL [Sesamum indicum]                                                                |
| c26530.graph_c0 | 0             | 0.1307766     | 0.05596167    | 2.05730633     | 1.77182143     | 2.89260705     | 8.776E-09 | 4.07558  | up        | hypothetical protein MIMGU_mgv1a009852mg [Erythranthe<br>cuttata]                                           |
| c26533.graph_c0 | 2.65958304    | 3.03496068    | 3.34931611    | 19.4456744     | 19.0236647     | 18.1072597     | 1.663E-17 | 1.55168  | up        | PREDICTED: 54S ribosomal protein L12, mitochondrial [Sesamum<br>indicum]                                    |
| c26539.graph_c1 | 24.134704     | 23.6555614    | 25.1989157    | 17.2716946     | 17.6612818     | 17.3893835     | 1.009E-66 | -1.57149 | down      | PREDICTED: grpE protein homolog, mitochondrial isoform X2<br>[Sesamum indicum]                              |
| c26540.graph_c0 | 0.73732778    | 0.54552712    | 0.6385295     | 5.62679858     | 5.78521605     | 5.75115967     | 9.581E-26 | 2.06974  | up        | PREDICTED: chromosome-associated kinesin KIF4A [Sesamum<br>indicum]                                         |
| c26542.graph_c0 | 2.87400532    | 2.40612049    | 2.75312064    | 17.0902677     | 18.0027276     | 18.1291746     | 5.711E-18 | 1.63762  | up        | PREDICTED: 50S ribosomal protein L21, mitochondrial [Sesamum<br>indicum]                                    |
| c26546.graph_c0 | 11.765041     | 6.03440461    | 5.49765217    | 0              | 0.1914183      | 0              | 3.944E-12 | -8.01913 | down      | heat shock protein 70-1 [Nicotiana tabacum]                                                                 |
| c26547.graph_c0 | 0             | 0             | 0.33361398    | 2.35857248     | 2.38511819     | 3.38725355     | 2.574E-08 | 3.47879  | up        | -                                                                                                           |
| c26548.graph_c0 | 0.12173276    | 0.12185466    | 0.26071903    | 4.98407297     | 5.99132474     | 4.93329812     | 7.736E-22 | 3.87712  | up        | PREDICTED: amino acid permease 6 [Sesamum indicum]                                                          |
| c26549.graph_c0 | 2.76018101    | 2.32669045    | 2.24017382    | 0.47512508     | 0.61965713     | 0.38769818     | 1.725E-17 | -3.39526 | down      | PREDICTED: uncharacterized protein LOC105160363 [Sesamum<br>indicum]                                        |



| #ID             | 0 h-1<br>FPKM | 0 h-2<br>FPKM | 0 h-3<br>FPKM | 28 h-1<br>FPKM | 28 h-2<br>FPKM | 28 h-3<br>FPKM | FDR       | log2FC   | regulated | nr_annotation                                                                                  |
|-----------------|---------------|---------------|---------------|----------------|----------------|----------------|-----------|----------|-----------|------------------------------------------------------------------------------------------------|
| c26550.graph_c0 | 3.8962461     | 4.0290781     | 4.01374015    | 22.0690774     | 20.4123152     | 23.011522      | 1.234E-25 | 1.36526  | up        | PREDICTED: glycoprotein 3-alpha-L-fucosyltransferase A [Sesamum indicum]                       |
| c26554.graph_c0 | 16.216429     | 14.0597906    | 16.4084672    | 77.4906769     | 98.7076755     | 93.1437895     | 7.42E-15  | 1.43735  | up        | hypothetical protein MIMGU_mgv1a016/11mg [Erythranthe guffata]                                 |
| c26555.graph_c0 | 3.04088308    | 1.88933466    | 2.56018786    | 19.9670769     | 19.7486653     | 19.3401305     | 8.238E-13 | 1.88952  | up        | PREDICTED: cytochrome c oxidase subunit 6b-2-like [Sesamum indicum]                            |
| c26558.graph_c0 | 1.42630536    | 1.00781195    | 1.83285886    | 0.03048913     | 0              | 0              | 8.126E-17 | -8.22851 | down      | -                                                                                              |
| c26561.graph_c0 | 2.72465804    | 2.35547005    | 2.54639524    | 15.3470597     | 14.0601371     | 14.6898245     | 6.272E-11 | 1.44162  | up        | PREDICTED: vesicle-associated membrane protein 724 [Sesamum indicum]                           |
| c26569.graph_c0 | 0.3729222     | 0.07465913    | 0.57506375    | 9.26948953     | 9.15258918     | 9.55430875     | 3.166E-20 | 3.67299  | up        | PREDICTED: uncharacterized protein LOC105155725 [Sesamum indicum]                              |
| c26574.graph_c0 | 6.91418328    | 7.11335976    | 5.75879582    | 0.93059047     | 1.00828314     | 1.29090219     | 6.881E-44 | -3.70174 | down      | PREDICTED: zinc finger CCCH domain-containing protein 48-like [Sesamum indicum]                |
| c26576.graph_c0 | 1.62758065    | 2.50415677    | 2.40135826    | 17.3056265     | 16.258284      | 17.0884998     | 1.801E-34 | 1.86082  | up        | PREDICTED: ATP-dependent zinc metalloprotease FTSH 7, chloroplastic [Sesamum indicum]          |
| c26578.graph_c0 | 0.63278934    | 0.63342298    | 0.5227453     | 9.85516376     | 10.8262515     | 10.4810589     | 4.657E-27 | 3.03453  | up        | PREDICTED: transcription repressor KAN1 [Sesamum indicum]                                      |
| c26579.graph_c0 | 44.8314832    | 44.2409039    | 41.6829249    | 21.5976724     | 19.064239      | 22.9123744     | 9.05E-136 | -2.12928 | down      | PREDICTED: uncharacterized protein LOC105161451 [Sesamum indicum]                              |
| c26585.graph_c0 | 0.03186086    | 0             | 0             | 1.62094021     | 2.00716393     | 2.43749918     | 2.091E-16 | 6.51514  | up        | PREDICTED: probable isoprenylcysteine alpha-carbonyl methyltransferase ICML2 [Sesamum indicum] |
| c26586.graph_c0 | 1.90805198    | 1.90996261    | 2.29114055    | 13.4811374     | 14.5943278     | 12.2990391     | 2.141E-22 | 1.63064  | up        | hypothetical protein NitaMp096 [Nicotiana tabacum]                                             |
| c26587.graph_c0 | 0.13548058    | 0.3390406     | 0.43524476    | 2.8062953      | 4.93428406     | 5.18243707     | 8.085E-06 | 2.72756  | up        | Selenoprotein H [Gossypium arboreum]                                                           |
| c26588.graph_c0 | 18.3667864    | 17.6398329    | 17.861009     | 80.3638321     | 91.1288049     | 85.006225      | 3.752E-20 | 1.16101  | up        | -                                                                                              |
| c26591.graph_c0 | 20784.3207    | 19032.3289    | 20528.9155    | 9887.92024     | 10697.4993     | 11635.0432     | 6.747E-20 | -1.99538 | down      | -                                                                                              |
| c26595.graph_c0 | 0.47198792    | 0.53995491    | 1.039754      | 8.23291445     | 8.71672213     | 8.23753654     | 9.703E-14 | 2.51628  | up        | PREDICTED: homeobox-leucine zipper protein HAT22-like [Sesamum indicum]                        |
| c26599.graph_c1 | 6.26271054    | 5.1676741     | 7.12341797    | 1.26094445     | 1.24958921     | 1.53083275     | 1.204E-21 | -3.29074 | down      | PREDICTED: uncharacterized protein LOC105450095 [Maus domestica]                               |
| c26604.graph_c0 | 0.93702604    | 0.39081847    | 0.50171482    | 13.3934941     | 12.2467949     | 13.1518256     | 2.22E-22  | 3.32278  | up        | -                                                                                              |
| c26607.graph_c0 | 14.4314151    | 14.445866     | 13.5996225    | 4.07892696     | 4.20901556     | 5.32539375     | 4.126E-25 | -2.73019 | down      | PREDICTED: heat stress transcription factor A-8 [Sesamum indicum]                              |
| c26607.graph_c1 | 41.5186745    | 43.9383561    | 42.3772219    | 9.61999291     | 9.39122122     | 11.8418461     | 1.32E-196 | -3.14033 | down      | PREDICTED: heat stress transcription factor A-8 [Sesamum indicum]                              |
| c26609.graph_c1 | 20.3570047    | 22.8790233    | 21.357922     | 10.2985537     | 10.5405685     | 11.0656147     | 2.111E-79 | -2.10818 | down      | PREDICTED: homeobox-leucine zipper protein HDG5 isoform X2 [Sesamum indicum]                   |
| c26612.graph_c0 | 0             | 0             | 0             | 5.7478571      | 7.20463027     | 5.7386031      | 2.43E-19  | Inf      | up        | PREDICTED: gibberellin-regulated protein 9-like [Solanum tuberosum]                            |
| c26614.graph_c0 | 79.6598938    | 76.4765612    | 78.0505533    | 363.690394     | 367.891914     | 371.077152     | 2.666E-47 | 1.14492  | up        | PREDICTED: dnaJ protein homolog [Sesamum indicum]                                              |
| c26616.graph_c0 | 62.770186     | 64.0623829    | 57.3402847    | 20.8269826     | 20.6554449     | 23.1450916     | 7.25E-190 | -2.5996  | down      | PREDICTED: uncharacterized protein LOC105165909 [Sesamum indicum]                              |

| #ID             | 0 h-1<br>FPKM | 0 h-2<br>FPKM | 0 h-3<br>FPKM | 28 h-1<br>FPKM | 28 h-2<br>FPKM | 28 h-3<br>FPKM | FDR       | log2FC   | regulated | nr_annotation                                                                                               |
|-----------------|---------------|---------------|---------------|----------------|----------------|----------------|-----------|----------|-----------|-------------------------------------------------------------------------------------------------------------|
| c26621.graph_c0 | 2.73607994    | 2.36870894    | 2.37565611    | 12.5763435     | 11.9133166     | 11.709426      | 9.317E-11 | 1.18555  | up        | PREDICTED: protein ROOT PRIMORDIUM DEFECTIVE 1 isoform X2 [Sesamum indicum]                                 |
| c26624.graph_c0 | 0.04105661    | 0.08219545    | 0             | 2.267818       | 2.20928179     | 2.84882833     | 1.934E-14 | 4.82043  | up        | PREDICTED: vinorine synthase-like [Sesamum indicum]                                                         |
| c26625.graph_c0 | 0.22899539    | 0.45844938    | 0.58853628    | 6.32443603     | 4.80873496     | 5.43230332     | 3.495E-07 | 2.59839  | up        | PREDICTED: V-type proton ATPase subunit c&apos;&apos;2 [Sesamum indicum]                                    |
| c26630.graph_c0 | 32.3789992    | 30.748145     | 30.4127211    | 10.8035783     | 11.3754763     | 10.6000647     | 2.44E-140 | -2.60293 | down      | PREDICTED: annexin D5 [Sesamum indicum]                                                                     |
| c26634.graph_c0 | 1.45007138    | 1.6203052     | 2.16674318    | 14.2154429     | 12.4147483     | 13.1796424     | 1.426E-24 | 1.8306   | up        | PREDICTED: pentatricopeptide repeat-containing protein At3g59040 [Sesamum indicum]                          |
| c26636.graph_c0 | 56.2039248    | 60.248626     | 50.3582056    | 45.277654      | 43.6499736     | 47.4267948     | 3.132E-37 | -1.37943 | down      | PREDICTED: ethylene-responsive transcription factor ERF008-like [Sesamum indicum]                           |
| c26638.graph_c0 | 0.47739881    | 0.47787686    | 0.24539055    | 12.1439747     | 11.8420602     | 10.2491345     | 4.895E-19 | 3.7501   | up        | -                                                                                                           |
| c26639.graph_c0 | 3.9333911     | 3.82795953    | 4.49294515    | 0.39705083     | 0.64529941     | 0.97197071     | 8.694E-20 | -3.69449 | down      | PREDICTED: UDP-glucuronate 4-epimerase 5-like [Sesamum indicum]                                             |
| c26640.graph_c0 | 1.22171486    | 1.22293822    | 1.50956919    | 0.71717852     | 0.64754497     | 0.69668074     | 1.374E-07 | -2.03304 | down      | -                                                                                                           |
| c26644.graph_c0 | 0.04765713    | 0             | 0             | 3.56760372     | 4.75363274     | 4.0134101      | 1.47E-21  | 6.95649  | up        | PREDICTED: protein polybromo-1-like isoform X1 [Cucumis melo]                                               |
| c26648.graph_c0 | 0.16870275    | 0             | 0             | 7.23411882     | 3.54263378     | 6.60333566     | 7.288E-07 | 5.6295   | up        | -                                                                                                           |
| c26649.graph_c0 | 26.3751529    | 21.7601928    | 23.4466074    | 25.7779065     | 23.8677755     | 24.3915201     | 1.492E-18 | -1.04084 | down      | PREDICTED: ganglioside-induced differentiation-associated protein 2 [Sesamum indicum]                       |
| c26650.graph_c0 | 4.71048956    | 5.52987557    | 6.05316558    | 5.34146537     | 4.96849874     | 4.62186279     | 1.618E-08 | -1.21977 | down      | PREDICTED: uncharacterized protein LOC105161159 [Sesamum indicum]                                           |
| c26651.graph_c0 | 5.6199084     | 6.56312521    | 6.10414453    | 37.7331574     | 37.1866872     | 37.178069      | 1.737E-25 | 1.52468  | up        | hypothetical protein AM1K_S00062p00211520 [Amborella trichopoda]                                            |
| c26653.graph_c0 | 0             | 0.04438812    | 0             | 2.96504573     | 2.99725331     | 2.05127546     | 1.391E-16 | 6.41278  | up        | PREDICTED: basic leucine zipper 61-like [Sesamum indicum]                                                   |
| c26655.graph_c0 | 0             | 0.44280995    | 0             | 7.71623459     | 5.22527728     | 6.68990844     | 4.377E-11 | 4.38917  | up        | BnaA05g08010D [Brassica napus]                                                                              |
| c26655.graph_c1 | 0.9964087     | 0.66493764    | 0.42680821    | 16.173445      | 15.4437948     | 15.1952995     | 2.333E-42 | 3.40548  | up        | PREDICTED: uncharacterized protein LOC105174078 [Sesamum indicum]                                           |
| c26658.graph_c0 | 1.16106525    | 1.93704647    | 1.65779424    | 0.12501563     | 0.08465805     | 0.0765088      | 1.852E-17 | -5.14905 | down      | -                                                                                                           |
| c26666.graph_c0 | 22.505543     | 21.3951387    | 20.0821362    | 13.1930887     | 14.1402888     | 14.8702655     | 1.027E-54 | -1.68915 | down      | PREDICTED: potassium/sodium hyperpolarization-activated cyclic nucleotide-gated channel 4 [Sesamum indicum] |
| c26667.graph_c0 | 70.096248     | 73.1312179    | 67.1248351    | 3.26155884     | 3.00377947     | 4.57761725     | 0         | -5.36585 | down      | hypothetical protein CARUB_v10021660mg, partial [Capsella rubella]                                          |
| c26671.graph_c0 | 18.012511     | 10.3855956    | 10.9252848    | 0              | 0              | 0              | 3.747E-24 | -Inf     | down      | predicted protein [Hordeum vulgare subsp. vulgare]                                                          |
| c26672.graph_c0 | 1.08462259    | 0.82513859    | 0.50176187    | 8.32442104     | 7.40229032     | 8.10487792     | 7.712E-15 | 2.22334  | up        | PREDICTED: alpha/beta hydrolase domain-containing protein 17B-like [Sesamum indicum]                        |
| c26673.graph_c0 | 25.9940895    | 25.4979758    | 26.2535353    | 6.76080912     | 10.953648      | 9.64144917     | 9.592E-72 | -2.59765 | down      | PREDICTED: uncharacterized protein LOC105177028 [Sesamum indicum]                                           |

| #ID             | 0 h-1<br>FPKM | 0 h-2<br>FPKM | 0 h-3<br>FPKM | 28 h-1<br>FPKM | 28 h-2<br>FPKM | 28 h-3<br>FPKM | FDR       | log2FC   | regulated | nr_annotation                                                                             |
|-----------------|---------------|---------------|---------------|----------------|----------------|----------------|-----------|----------|-----------|-------------------------------------------------------------------------------------------|
| c26676.graph_c0 | 1.04607464    | 0.4430132     | 0.93063276    | 10.4977263     | 8.71279294     | 8.20814564     | 7.635E-19 | 2.41085  | up        | PREDICTED: probable receptor-like protein kinase At2g42960 [Sesamum indicum]              |
| c26684.graph_c0 | 3.21498733    | 1.68572729    | 2.16405933    | 0              | 0              | 0              | 2.206E-17 | -Inf     | down      | predicted protein [Nectria haematococca mpVI 77-13-4]                                     |
| c26685.graph_c0 | 0.08453855    | 0             | 0.07242359    | 4.28046852     | 5.14082087     | 4.09446269     | 3.691E-32 | 5.33503  | up        | PREDICTED: kinesin-like protein NACK1 [Sesamum indicum]                                   |
| c26693.graph_c0 | 1.77994775    | 1.83829296    | 1.23441767    | 14.9283768     | 16.2229148     | 16.0687687     | 2.432E-41 | 2.19671  | up        | PREDICTED: ATP-dependent 6-phosphofructokinase 4, chloroplastic [Sesamum indicum]         |
| c26694.graph_c0 | 0.09804912    | 0.07361048    | 0.0629985     | 5.11301513     | 4.29486085     | 4.41931113     | 2.249E-34 | 4.79521  | up        | PREDICTED: putative inactive cadmium/zinc-transporting ATPase HMA3 [Sesamum indicum]      |
| c26695.graph_c0 | 4.80948768    | 5.11519763    | 4.63528656    | 1.23799239     | 1.05203864     | 2.34721008     | 4.714E-27 | -2.73671 | down      | -                                                                                         |
| c26696.graph_c0 | 0.23335796    | 0.13348094    | 0.12851752    | 1.59911611     | 1.15945684     | 1.40371915     | 2.597E-05 | 1.98739  | up        | PREDICTED: glutamate synthase 1 [NADH], chloroplastic isoform X1 [Sesamum indicum]        |
| c26697.graph_c0 | 2.15414048    | 1.64463371    | 1.73596212    | 0              | 0              | 0              | 2.12E-48  | -Inf     | down      | hypothetical protein VHEMI06393 [Torrubiella hemipterigena]                               |
| c26698.graph_c0 | 1.19765436    | 1.04416284    | 1.16668651    | 23.4740248     | 21.2835779     | 20.8042921     | 1E-124    | 3.17481  | up        | PREDICTED: auxin response factor 9 [Sesamum indicum]                                      |
| c26701.graph_c0 | 1.0291294     | 1.07698537    | 1.38258438    | 11.8314513     | 11.4194286     | 11.3189138     | 2.305E-20 | 2.21416  | up        | PREDICTED: 3-deoxy-manno-octulosonate cytidyltransferase, mitochondrial [Sesamum indicum] |
| c26703.graph_c0 | 1.41739228    | 1.0286384     | 1.13837825    | 8.88506564     | 9.09203205     | 8.93133313     | 9.041E-16 | 1.81982  | up        | PREDICTED: probable arabinosyltransferase ARAD1 [Sesamum indicum]                         |
| c26708.graph_c0 | 0             | 0             | 0             | 11.1558966     | 8.51945744     | 9.86880358     | 1.458E-33 | Inf      | up        | PREDICTED: intracellular ribonuclease LX-like [Sesamum indicum]                           |
| c26709.graph_c0 | 0             | 0             | 0             | 1.08919371     | 1.39320638     | 2.11083628     | 9.532E-07 | Inf      | up        | RecName: Full=60S ribosomal protein L5 [Helianthus annuus]                                |
| c26715.graph_c1 | 0.51613562    | 0.53510432    | 0.54481636    | 3.85842232     | 4.23377694     | 4.24164982     | 1.182E-14 | 1.85902  | up        | hypothetical protein MIMGU_mgv1a001258mg [Erythranthe guttata]                            |
| c26721.graph_c0 | 0             | 0             | 0             | 16.8236646     | 28.4076314     | 21.4299006     | 4.783E-26 | Inf      | up        | hypothetical protein MIMGU_mgv1a020088mg [Erythranthe guttata]                            |
| c26721.graph_c1 | 0             | 0             | 0             | 21.9607705     | 34.0902038     | 24.867329      | 1.635E-29 | Inf      | up        | hypothetical protein MIMGU_mgv1a026045mg [Erythranthe guttata]                            |
| c26722.graph_c0 | 4.91935208    | 4.67389105    | 4.98224817    | 66.6288939     | 70.5555808     | 68.8075973     | 1.39E-136 | 2.73006  | up        | PREDICTED: aldose 1-epimerase-like [Sesamum indicum]                                      |
| c26727.graph_c0 | 1.23801183    | 1.40448505    | 0.58332788    | 9.53766655     | 9.50527719     | 6.92607616     | 7.472E-09 | 1.9257   | up        | PREDICTED: uncharacterized protein LOC105174183 [Sesamum indicum]                         |
| c26737.graph_c0 | 15.3864814    | 8.15842617    | 10.8160014    | 0              | 0              | 0              | 2.664E-31 | -Inf     | down      | cytochrome c oxidase subunit III (mitochondrion) [Chlorella sorokiniana]                  |
| c26738.graph_c0 | 0.20906542    | 0.13951651    | 0.13432867    | 3.36817059     | 3.10973944     | 3.53365676     | 2.251E-14 | 3.28866  | up        | PREDICTED: UPF0496 protein At4g54520-like [Sesamum indicum]                               |
| c26739.graph_c0 | 0.13113565    | 0.13126696    | 0             | 24.3037021     | 17.8993905     | 22.1647545     | 1.134E-33 | 6.86859  | up        | PREDICTED: NAC domain-containing protein 100-like [Sesamum indicum]                       |
| c26741.graph_c0 | 2.21161621    | 1.64360166    | 1.55018967    | 11.349147      | 9.82941072     | 10.8109041     | 2.996E-14 | 1.47879  | up        | PREDICTED: calcium uptake protein 1, mitochondrial [Sesamum indicum]                      |
| c26743.graph_c0 | 26.9953053    | 28.7808405    | 24.7194726    | 16.89621       | 16.3124481     | 15.6277739     | 2.619E-82 | -1.81043 | down      | PREDICTED: endo-1,3(4)-beta-glucanase 2 [Sesamum indicum]                                 |
| c26744.graph_c0 | 1.74652054    | 1.20193522    | 1.4728534     | 0              | 0              | 0              | 5.027E-32 | -Inf     | down      | -                                                                                         |

| #ID             | 0 h-1<br>FPKM | 0 h-2<br>FPKM | 0 h-3<br>FPKM | 28 h-1<br>FPKM | 28 h-2<br>FPKM | 28 h-3<br>FPKM | FDR       | log2FC   | regulated | nr_annotation                                                                                    |
|-----------------|---------------|---------------|---------------|----------------|----------------|----------------|-----------|----------|-----------|--------------------------------------------------------------------------------------------------|
| c26746.graph_c0 | 0             | 0.0352468     | 0             | 6.11637979     | 5.869119       | 6.03504064     | 4.122E-39 | 7.91634  | up        | PREDICTED: uncharacterized protein LOC105157258 [Sesamum indicum]                                |
| c26750.graph_c1 | 3.65393183    | 4.07165756    | 4.16388702    | 0.15032018     | 0.85959187     | 0.28620677     | 7.818E-32 | -4.2933  | down      | hypothetical protein CICLE_v10032119mg [Citrus clementina]                                       |
| c26752.graph_c0 | 2.20550616    | 2.89286746    | 2.29664911    | 1.520038       | 1.09796144     | 1.17268376     | 2.382E-13 | -2.05453 | down      | PREDICTED: cytochrome P450 84A1-like [Sesamum indicum]                                           |
| c26755.graph_c0 | 4.74696891    | 2.40113626    | 2.95268038    | 0              | 0              | 0              | 1.168E-21 | -Inf     | down      | NADH dehydrogenase subunit 5 [Pneumocystis carinii]                                              |
| c26756.graph_c0 | 3.06699925    | 1.94767906    | 2.7122343     | 2.9481346      | 2.64024775     | 2.32742112     | 0.0005743 | -1.05589 | down      | PREDICTED: uncharacterized protein LOC105171097 [Sesamum indicum]                                |
| c26757.graph_c0 | 56.2531835    | 55.7077798    | 53.1382741    | 35.1128321     | 31.4959751     | 27.7511388     | 1.3E-115  | -1.89765 | down      | PREDICTED: protein SPA1-RELATED 4-like [Solanum lycopersicum]                                    |
| c26758.graph_c0 | 0.75856059    | 0.89737839    | 0.443082      | 2.85682688     | 3.71078314     | 3.14909386     | 0.009312  | 1.1264   | up        | hypothetical protein MIMGU_mgv1a001946mg [Erythranthe diffusa]                                   |
| c26760.graph_c0 | 3.27785664    | 2.91656793    | 2.63260972    | 14.8895457     | 12.6073567     | 12.1227483     | 2.367E-08 | 1.07781  | up        | PREDICTED: NAC domain-containing protein 18 [Sesamum indicum]                                    |
| c26762.graph_c0 | 1.09647608    | 1.20733144    | 0.98631062    | 8.75275558     | 7.86694077     | 7.60820684     | 2.608E-25 | 1.79123  | up        | PREDICTED: uncharacterized protein LOC105177385 [Sesamum indicum]                                |
| c26763.graph_c0 | 0             | 0             | 0             | 2.02205018     | 1.61093094     | 1.60144772     | 1.136E-10 | Inf      | up        | unnamed protein product [Coffea canephora]                                                       |
| c26765.graph_c0 | 0.46446595    | 0.19925616    | 0.42632652    | 9.54844175     | 8.6648898      | 9.44418241     | 4.496E-21 | 3.57417  | up        | PREDICTED: uncharacterized protein LOC105158032 [Sesamum indicum]                                |
| c26766.graph_c0 | 1.81079752    | 2.24763734    | 1.58232362    | 8.52818026     | 8.05663548     | 8.69865681     | 5.818E-07 | 1.07628  | up        | hypothetical protein MIMGU_mgv1a004061mg [Erythranthe diffusa]                                   |
| c26767.graph_c0 | 54.6529913    | 54.2397096    | 49.0132595    | 15.5952858     | 15.9058081     | 16.4615894     | 0         | -2.80802 | down      | unnamed protein product [Coffea canephora]                                                       |
| c26775.graph_c0 | 0.28165492    | 0.56387391    | 0.12064591    | 3.00234253     | 2.77244367     | 2.61692474     | 5.216E-05 | 2.03698  | up        | PREDICTED: transcription factor bHLH35-like isoform X2 [Sesamum indicum]                         |
| c26777.graph_c0 | 14.1023944    | 13.2036696    | 14.6483772    | 13.9422136     | 13.8281274     | 14.003618      | 2.523E-23 | -1.09743 | down      | PREDICTED: pentatricopeptide repeat-containing protein At5g47360 [Sesamum indicum]               |
| c26779.graph_c0 | 0.05748938    | 0.28773475    | 0.18469033    | 1.83844991     | 0.9808783      | 1.29559282     | 0.0027194 | 1.86087  | up        | PREDICTED: probable leucine-rich repeat receptor-like protein kinase At1g35710 [Sesamum indicum] |
| c26780.graph_c0 | 31.5938168    | 31.4146168    | 29.3668309    | 7.34790526     | 8.01665067     | 8.55655005     | 7.966E-90 | -3.03837 | down      | PREDICTED: desiccation-related protein PCC3-06 isoform X2 [Sesamum indicum]                      |
| c26781.graph_c0 | 1.36078361    | 1.05566333    | 1.04919649    | 0.37087863     | 0.1785966      | 0.38333632     | 8.9E-15   | -2.97894 | down      | PREDICTED: rop guanine nucleotide exchange factor 5-like [Sesamum indicum]                       |
| c26785.graph_c0 | 1.50732417    | 1.19666108    | 0.80150534    | 0.5099809      | 0.61395325     | 0.63191667     | 4.184E-06 | -2.08026 | down      | 1-deoxy-D-xylose-5-phosphate synthase [Andrographis paniculata]                                  |
| c26786.graph_c0 | 9.49467719    | 8.73058825    | 10.2148209    | 1.28384682     | 1.12296852     | 1.11308405     | 9.777E-80 | -4.10637 | down      | hypothetical protein MIMGU_mgv1a013028mg [Erythranthe diffusa]                                   |
| c26787.graph_c0 | 15.3789918    | 18.2412996    | 17.7998881    | 16.3832575     | 15.1381657     | 17.9913928     | 6.313E-13 | -1.14576 | down      | PREDICTED: CASP-like protein 4A3 [Sesamum indicum]                                               |
| c26789.graph_c0 | 1.84425579    | 2.50318987    | 1.56657164    | 8.63304918     | 9.47687711     | 8.19386304     | 7.178E-08 | 1.06483  | up        | PREDICTED: uncharacterized protein LOC105174843 [Sesamum indicum]                                |
| c26790.graph_c0 | 4.95812546    | 3.69050302    | 3.1040093     | 0.73918708     | 1.08455202     | 0.75396327     | 2.201E-15 | -3.27523 | down      | -                                                                                                |
| c26796.graph_c0 | 5.56169541    | 4.86335758    | 4.92896468    | 47.1590953     | 47.9499665     | 45.4194691     | 4.346E-51 | 2.10464  | up        | PREDICTED: acylpyruvase FAHD1, mitochondrial [Sesamum indicum]                                   |

| #ID             | 0 h-1<br>FPKM | 0 h-2<br>FPKM | 0 h-3<br>FPKM | 28 h-1<br>FPKM | 28 h-2<br>FPKM | 28 h-3<br>FPKM | FDR       | log2FC   | regulated | nr_annotation                                                                 |
|-----------------|---------------|---------------|---------------|----------------|----------------|----------------|-----------|----------|-----------|-------------------------------------------------------------------------------|
| c26804.graph_c0 | 0             | 0             | 0             | 2.43854532     | 2.31766083     | 1.78037695     | 1.326E-20 | Inf      | up        | PREDICTED: NAC domain-containing protein 45 [Sesamum indicum]                 |
| c26806.graph_c0 | 0             | 0             | 0             | 4.27010543     | 4.5068915      | 4.27988969     | 5.519E-39 | Inf      | up        | PREDICTED: uncharacterized protein LOC105179467 isoform X2 [Sesamum indicum]  |
| c26810.graph_c0 | 18.5002897    | 11.3270422    | 13.3870784    | 0              | 0              | 0              | 4.78E-33  | -Inf     | down      | -                                                                             |
| c26813.graph_c0 | 2.84650355    | 2.21616414    | 1.4225049     | 113.095623     | 149.436211     | 166.000646     | 1.161E-30 | 4.96449  | up        | PREDICTED: non-specific lipid-transfer protein 2-like [Sesamum indicum]       |
| c26813.graph_c1 | 2.35516353    | 3.17358713    | 2.79367235    | 0.921695       | 1.84273779     | 0.69837448     | 4.911E-10 | -2.36043 | down      | PREDICTED: PRA1 family protein F2-like [Sesamum indicum]                      |
| c26814.graph_c0 | 6.87094134    | 6.14418725    | 9.18260892    | 53.0004455     | 55.7299741     | 57.7544602     | 1.995E-36 | 1.81214  | up        | hypothetical protein MIMGU_mgv1a016555mg [Erythranthe outtata]                |
| c26817.graph_c0 | 0.3319957     | 0.66465629    | 1.27988287    | 20.5098679     | 16.9934358     | 15.5545282     | 5.731E-11 | 3.43607  | up        | unknown [Medicago truncatula]                                                 |
| c26817.graph_c1 | 1.3492705     | 1.75080577    | 1.92651779    | 46.8528967     | 40.7624726     | 43.2105777     | 1.64E-107 | 3.60753  | up        | PREDICTED: protein BRASSINAZOLE-RESISTANT 1 [Sesamum indicum]                 |
| c26818.graph_c0 | 64.4910871    | 62.5058671    | 62.554912     | 29.0687745     | 31.7576069     | 31.9288374     | 1.06E-145 | -2.12117 | down      | PREDICTED: uncharacterized protein LOC105165319 [Sesamum indicum]             |
| c26819.graph_c0 | 1.19267902    | 1.42029756    | 1.13626741    | 19.4289984     | 18.4466807     | 16.6222086     | 2.205E-82 | 2.77156  | up        | PREDICTED: BTB/POZ domain-containing protein At1g63850-like [Sesamum indicum] |
| c26821.graph_c0 | 4.8033793     | 6.01023645    | 4.56230668    | 84.5066229     | 82.3316758     | 81.2184379     | 5.24E-144 | 2.9226   | up        | hypothetical protein MIMGU_mgv1a0088/9mg [Erythranthe outtata]                |
| c26822.graph_c0 | 1.39291113    | 1.81865989    | 1.08953231    | 0.96834414     | 0.079484       | 0.50282967     | 1.081E-07 | -2.5573  | down      | -                                                                             |
| c26824.graph_c0 | 0             | 0.2833105     | 0.36370102    | 65.344814      | 57.1429401     | 59.195638      | 1.53E-135 | 7.02425  | up        | PREDICTED: arabinogalactan peptide 22-like [Sesamum indicum]                  |
| c26829.graph_c0 | 78.0159633    | 93.9857191    | 79.7650926    | 5.74443676     | 8.49543691     | 9.29400949     | 8.671E-95 | -4.50853 | down      | -                                                                             |
| c26830.graph_c1 | 8.35110496    | 8.1365482     | 7.44050702    | 2.99430391     | 5.91863867     | 5.480978       | 8.556E-12 | -1.82188 | down      | PREDICTED: type 1 phosphatases regulator ypi1 [Sesamum indicum]               |
| c26833.graph_c0 | 1.62011843    | 0.94601542    | 0.86746513    | 17.6133288     | 18.3396055     | 18.1755959     | 2.673E-29 | 2.89515  | up        | unnamed protein product [Coffea canephora]                                    |
| c26837.graph_c0 | 7.1977646     | 8.40580075    | 6.43831653    | 4.82099627     | 3.88983234     | 5.69159073     | 9.637E-15 | -1.7011  | down      | -                                                                             |
| c26839.graph_c0 | 0             | 0             | 0             | 4.54193622     | 4.1952171      | 5.70837361     | 2.034E-19 | Inf      | up        | PREDICTED: 36.4 kDa proline-rich protein-like, partial [Cucumis sativus]      |
| c26840.graph_c0 | 0.08246542    | 0.082548      | 0             | 20.3980127     | 16.4873541     | 16.905448      | 2.269E-79 | 7.27809  | up        | PREDICTED: uncharacterized protein LOC105157872 [Sesamum indicum]             |
| c26843.graph_c0 | 5.75859373    | 7.30152277    | 4.44001256    | 3.34825018     | 2.01543733     | 3.64285974     | 1.334E-07 | -2.04312 | down      | -                                                                             |
| c26844.graph_c0 | 17.7153225    | 15.8396879    | 17.9036381    | 158.125936     | 167.90044      | 159.316925     | 3.65E-137 | 2.14634  | up        | PREDICTED: alcohol dehydrogenase class-3 [Sesamum indicum]                    |
| c26847.graph_c0 | 24.4006139    | 27.7004369    | 23.9072614    | 2.2422584      | 1.10429951     | 1.55244265     | 3.38E-156 | -5.04523 | down      | PREDICTED: WRKY transcription factor 22 [Sesamum indicum]                     |
| c26848.graph_c0 | 56.9290091    | 50.0111641    | 52.961918     | 376.152302     | 390.608851     | 412.707891     | 3.885E-89 | 1.79327  | up        | TPA: hypothetical protein ZEAMMB73_262778, partial [Zea mays]                 |
| c26851.graph_c0 | 1.21368323    | 1.95733655    | 1.73292334    | 1.61717962     | 1.28317229     | 1.39958145     | 0.0007915 | -1.28304 | down      | -                                                                             |
| c26853.graph_c0 | 49.7629291    | 54.8733634    | 47.231831     | 9.0170259      | 10.1141461     | 8.47607841     | 7.7E-161  | -3.54996 | down      | PREDICTED: scarecrow-like protein 21 [Sesamum indicum]                        |

| #ID             | 0 h-1<br>FPKM | 0 h-2<br>FPKM | 0 h-3<br>FPKM | 28 h-1<br>FPKM | 28 h-2<br>FPKM | 28 h-3<br>FPKM | FDR       | log2FC   | regulated | nr_annotation                                                                                          |
|-----------------|---------------|---------------|---------------|----------------|----------------|----------------|-----------|----------|-----------|--------------------------------------------------------------------------------------------------------|
| c26854.graph_c0 | 1.58550047    | 2.01438107    | 1.56725452    | 50.0821479     | 50.1416047     | 48.461306      | 1.47E-112 | 3.75692  | up        | PREDICTED: lipoxygenase homology domain-containing protein 1-like [Sesamum indicum]                    |
| c26856.graph_c0 | 0.17672281    | 0.35379955    | 0.22709581    | 61.3948566     | 55.0858883     | 50.83135       | 2.255E-66 | 6.69517  | up        | PREDICTED: dof zinc finger protein DOF1.4-like isoform X2 [Sesamum indicum]                            |
| c26859.graph_c0 | 2.232391      | 2.00737626    | 1.7017776     | 11.0549244     | 10.2298578     | 9.3573224      | 5.196E-10 | 1.27878  | up        | hypothetical protein MIMGU_mgv1a011616mg [Erythranthe guttata]                                         |
| c26860.graph_c0 | 2.32599749    | 2.12586344    | 2.46917297    | 23.7408029     | 24.2230262     | 21.7713479     | 2.49E-36  | 2.24071  | up        | hypothetical protein MIMGU_mgv1a011282mg [Erythranthe guttata]                                         |
| c26862.graph_c0 | 73.3254192    | 76.640103     | 74.0922918    | 7.17398932     | 8.29386463     | 7.96008779     | 0         | -4.34812 | down      | PREDICTED: probable serine/threonine-protein kinase WNK11 [Sesamum indicum]                            |
| c26866.graph_c0 | 0.03798013    | 0.03801816    | 0             | 0.93852715     | 1.59510969     | 0.65320836     | 0.0003804 | 4.31635  | up        | PREDICTED: methylthioribose kinase [Sesamum indicum]                                                   |
| c26868.graph_c0 | 0.03221302    | 0             | 0             | 0.77260373     | 0.8455621      | 0.64954253     | 2.258E-10 | 5.07746  | up        | -                                                                                                      |
| c26870.graph_c0 | 0             | 0.10318111    | 0             | 2.99665668     | 3.17919752     | 3.60673988     | 1.341E-12 | 5.48601  | up        | PREDICTED: uncharacterized protein LOC104095178 [Nicotiana tomentosiformis]                            |
| c26871.graph_c0 | 1.74445425    | 1.30965079    | 2.03153408    | 0.67355025     | 0.6797001      | 0.79208717     | 9.302E-09 | -2.33803 | down      | PREDICTED: LOW QUALITY PROTEIN: anthranilate synthase alpha subunit 1, chloroplastic [Sesamum indicum] |
| c26878.graph_c0 | 0             | 0.06439695    | 0             | 7.71482407     | 7.05019629     | 8.88963268     | 6.351E-29 | 7.44024  | up        | PREDICTED: probable receptor-like protein kinase At1g80640 isoform X1 [Sesamum indicum]                |
| c26881.graph_c0 | 9.10731444    | 6.7715245     | 7.21854597    | 4.98607409     | 5.4745057      | 5.54293008     | 2.55E-13  | -1.6173  | down      | hypothetical protein MIMGU_mgv1a005840mg [Erythranthe guttata]                                         |
| c26885.graph_c0 | 3.42620939    | 4.15236134    | 4.20038645    | 112.667327     | 120.817653     | 107.28028      | 0         | 3.76139  | up        | PREDICTED: LOW QUALITY PROTEIN: SNF2 domain-containing protein CLASSY 1-like [Sesamum indicum]         |
| c26889.graph_c0 | 0.89078453    | 0.44583826    | 0.57234669    | 8.82105747     | 8.76835359     | 8.32052081     | 4.486E-10 | 2.67648  | up        | PREDICTED: premnaspirodiene oxygenase-like [Sesamum indicum]                                           |
| c26891.graph_c0 | 14.3484255    | 4.78759775    | 4.43884875    | 0              | 0              | 0              | 2.444E-07 | -Inf     | down      | PREDICTED: chlorophyll a-b binding protein of LHClI type 1 [Elaeis guineensis]                         |
| c26893.graph_c0 | 1.40606647    | 1.11770029    | 1.85999377    | 1.14214701     | 1.19408087     | 1.10366365     | 0.000733  | -1.4454  | down      | hypothetical protein MIMGU_mgv1a01841/mg [Erythranthe guttata]                                         |
| c26895.graph_c0 | 3.57527569    | 2.72674727    | 2.84413431    | 26.5417169     | 28.0146572     | 28.5489501     | 1.228E-45 | 2.09572  | up        | hypothetical protein MIMGU_mgv1a000048mg [Erythranthe guttata]                                         |
| c26897.graph_c0 | 1.82912893    | 1.09857631    | 1.5983421     | 14.67658       | 16.4204307     | 14.1021379     | 3.383E-17 | 2.22948  | up        | PREDICTED: hypoxanthine-guanine phosphoribosyltransferase [Nicotiana glauca]                           |
| c26898.graph_c0 | 0.6932653     | 0.56778504    | 0.48593092    | 7.12276546     | 6.57594285     | 6.22326509     | 4.552E-19 | 2.42463  | up        | PREDICTED: probable receptor-like protein kinase At2g42960 [Nelumbo nucifera]                          |
| c26899.graph_c0 | 10.3937641    | 12.5877635    | 8.90426558    | 55.117155      | 60.2913473     | 55.2486594     | 2.151E-16 | 1.33176  | up        | hypothetical protein MIMGU_mgv1a011204mg [Erythranthe guttata]                                         |
| c26901.graph_c0 | 3.23386552    | 3.39895893    | 3.15829037    | 26.7705414     | 28.5216965     | 26.1597515     | 5.597E-52 | 1.96599  | up        | PREDICTED: LL-diaminopimelate aminotransferase, chloroplastic [Sesamum indicum]                        |
| c26913.graph_c0 | 0.44704711    | 0.84526788    | 0.63830359    | 4.47655517     | 5.11757909     | 4.09470736     | 9.979E-07 | 1.7323   | up        | -                                                                                                      |
| c26916.graph_c0 | 14.7571685    | 17.4153464    | 13.4740984    | 7.33844872     | 6.72786855     | 7.87667333     | 7.329E-27 | -2.14502 | down      | hypothetical protein MIMGU_mgv1a026902mg, partial [Erythranthe guttata]                                |

| #ID             | 0 h-1<br>FPKM | 0 h-2<br>FPKM | 0 h-3<br>FPKM | 28 h-1<br>FPKM | 28 h-2<br>FPKM | 28 h-3<br>FPKM | FDR       | log2FC   | regulated | nr_annotation                                                                     |
|-----------------|---------------|---------------|---------------|----------------|----------------|----------------|-----------|----------|-----------|-----------------------------------------------------------------------------------|
| c26918.graph_c0 | 0             | 0.09688252    | 0             | 2.50890819     | 2.56170441     | 2.20031391     | 3.478E-17 | 5.14741  | up        | PREDICTED: probable beta-1,4-xylosyltransferase IRX14 [Sesamum indicum]           |
| c26922.graph_c0 | 5.49329034    | 4.56282661    | 3.67974131    | 36.8243655     | 47.3231875     | 42.5945339     | 1.205E-22 | 2.11987  | up        | PREDICTED: uncharacterized protein LOC105157862 isoform X2 [Sesamum indicum]      |
| c26924.graph_c0 | 1.51205362    | 1.18247477    | 1.21440548    | 7.36641165     | 7.17831213     | 7.72033426     | 1.54E-13  | 1.42201  | up        | PREDICTED: cell wall protein KBR5 isoform X2 [Sesamum indicum]                    |
| c26928.graph_c0 | 21.2644127    | 16.8132229    | 15.7361502    | 2.94664505     | 3.04062195     | 3.63119253     | 4.704E-38 | -3.57032 | down      | PREDICTED: probable protein phosphatase 2C51 [Sesamum indicum]                    |
| c26932.graph_c0 | 5.84509046    | 5.65176238    | 4.76240309    | 29.0683843     | 28.4331944     | 26.6550078     | 9.207E-33 | 1.2835   | up        | PREDICTED: uncharacterized protein LOC105170351 [Sesamum indicum]                 |
| c26933.graph_c0 | 2.64060791    | 2.10481184    | 2.10509392    | 12.4568908     | 12.5149436     | 12.0932631     | 4.738E-19 | 1.34752  | up        | PREDICTED: ABC transporter G family member 7 isoform X2 [Sesamum indicum]         |
| c26934.graph_c0 | 0.39252387    | 0.7421764     | 0.78463577    | 20.9208328     | 20.8643671     | 22.2960593     | 1.036E-73 | 3.96441  | up        | PREDICTED: BAG family molecular chaperone regulator 7 [Sesamum indicum]           |
| c26939.graph_c0 | 0.37174691    | 0.42936826    | 0.33072196    | 18.9128458     | 19.365907      | 16.8064101     | 1.3E-105  | 4.51565  | up        | PREDICTED: protein NRT1/ PTR FAMILY 5.10-like [Sesamum indicum]                   |
| c26940.graph_c0 | 3.92851751    | 3.26853097    | 2.88474316    | 44.3857531     | 49.0154703     | 44.9931318     | 4.83E-84  | 2.69173  | up        | PREDICTED: DELLA protein GAI-like [Sesamum indicum]                               |
| c26940.graph_c1 | 0.97629113    | 0.97726874    | 0             | 16.3199436     | 16.7855187     | 16.7909253     | 4.949E-14 | 3.60447  | up        | DELLA protein GAIP-B, putative [Ricinus communis]                                 |
| c26940.graph_c2 | 4.88713012    | 3.94518052    | 4.05171335    | 47.3782699     | 51.3647988     | 47.4020862     | 1.578E-52 | 2.41489  | up        | PREDICTED: LOW QUALITY PROTEIN: DELLA protein GAI [Sesamum indicum]               |
| c26945.graph_c0 | 32.0972311    | 32.8175509    | 33.3503514    | 32.165897      | 33.6106841     | 33.1019368     | 1.273E-31 | -1.08203 | down      | PREDICTED: uncharacterized protein LOC105161789, partial [Sesamum indicum]        |
| c26946.graph_c1 | 0             | 0             | 0             | 1.60460352     | 1.78970219     | 1.41203697     | 1.999E-14 | Inf      | up        | PREDICTED: protein NRT1/ PTR FAMILY 2.10-like [Sesamum indicum]                   |
| c26949.graph_c0 | 9.56422759    | 9.78193091    | 8.93848081    | 41.5150265     | 46.2784456     | 42.215991      | 2.734E-37 | 1.11065  | up        | PREDICTED: uncharacterized protein LOC105168910 isoform X1 [Sesamum indicum]      |
| c26950.graph_c0 | 0.1146561     | 0.09564243    | 0.1718939     | 36.2769328     | 38.5858027     | 37.4100876     | 0         | 7.10144  | up        | PREDICTED: alpha-xylosidase 1 [Sesamum indicum]                                   |
| c26952.graph_c0 | 0.46903035    | 0.26083334    | 0.73666091    | 4.99969877     | 5.57442616     | 4.91420019     | 1.881E-10 | 2.30115  | up        | nypotnetcal protein MIMGU_mgv1a006305mg [Erythranthe guifata]                     |
| c26954.graph_c0 | 0             | 0             | 0.13123956    | 2.59793204     | 2.74780717     | 1.48392393     | 2.917E-08 | 4.5688   | up        | PREDICTED: protein NK11/ P1K FAMILY 4.4 [Sesamum indicum]                         |
| c26959.graph_c0 | 0.30637837    | 0.30668517    | 0             | 8.01626532     | 8.54478554     | 9.53926026     | 4.345E-13 | 4.3422   | up        | -                                                                                 |
| c26965.graph_c0 | 1.62333324    | 1.57079347    | 1.59930307    | 25.1500268     | 24.9984578     | 24.9668247     | 3.093E-94 | 2.87952  | up        | PREDICTED: ethylene-responsive transcription factor ERF118-like [Sesamum indicum] |
| c26968.graph_c0 | 4.9854943     | 4.18394324    | 4.14161296    | 54.6076298     | 59.7483044     | 55.7888216     | 8.727E-96 | 2.58733  | up        | PREDICTED: V-type proton ATPase subunit E [Sesamum indicum]                       |
| c26969.graph_c0 | 0.10425848    | 0.27830102    | 0.13397628    | 5.68308489     | 5.5189905      | 5.13200162     | 7.612E-25 | 3.89261  | up        | PREDICTED: protein trichome birefringence-like 5 [Sesamum indicum]                |
| c26972.graph_c0 | 4.54346189    | 2.99755302    | 3.71542717    | 2.55167057     | 2.91378027     | 3.42941093     | 2.908E-05 | -1.4275  | down      | PREDICTED: telomere repeat-binding factor 4-like isoform X2 [Sesamum indicum]     |

| #ID             | 0 h-1<br>FPKM | 0 h-2<br>FPKM | 0 h-3<br>FPKM | 28 h-1<br>FPKM | 28 h-2<br>FPKM | 28 h-3<br>FPKM | FDR       | log2FC   | regulated | nr_annotation                                                                                     |
|-----------------|---------------|---------------|---------------|----------------|----------------|----------------|-----------|----------|-----------|---------------------------------------------------------------------------------------------------|
| c26974.graph_c0 | 299.484742    | 322.388712    | 290.318029    | 67.2390976     | 69.8890068     | 70.6964896     | 0         | -3.22378 | down      | PREDICTED: WW domain-containing protein C11B10.08 [Sesamum indicum]                               |
| c26976.graph_c0 | 0.15704198    | 0.39299808    | 0.45406161    | 3.02463592     | 3.4781128      | 2.70091577     | 6.081E-08 | 2.09499  | up        | PREDICTED: 12-oxophytodienoate reductase 5 [Sesamum indicum]                                      |
| c26982.graph_c0 | 0.14325226    | 0.14339571    | 0.18408483    | 1.35349393     | 1.39128894     | 1.17240554     | 1.365E-05 | 1.96205  | up        | PREDICTED: pentatricopeptide repeat-containing protein At2g22410, mitochondrial [Sesamum indicum] |
| c26985.graph_c0 | 2.9476693     | 2.74944225    | 2.84090382    | 56.2853526     | 54.1615295     | 52.2057976     | 2.34E-162 | 3.16127  | up        | hypothetical protein MIMGU_mgv1a004588mg [Erythranthe outtata]                                    |
| c26992.graph_c0 | 2.53283036    | 2.30487874    | 2.36711803    | 9.78995644     | 11.3325805     | 12.0852037     | 0.0004907 | 1.11511  | up        | hypothetical protein L484_015058 [Morus notabilis]                                                |
| c26994.graph_c0 | 1.21261836    | 0.58957584    | 0.97947935    | 4.60806566     | 4.81998942     | 4.17108864     | 2.079E-05 | 1.19971  | up        | PREDICTED: plastidal glycolate/glycerate translocator 1, chloroplastic [Sesamum indicum]          |
| c26995.graph_c0 | 36.6078112    | 32.13438      | 37.9441597    | 168.000072     | 171.434721     | 172.730179     | 4.306E-41 | 1.17188  | up        | hypothetical protein PHAVU_003G132300g [Phaseolus vulgaris]                                       |
| c27002.graph_c0 | 4.82077705    | 4.53136017    | 3.24853955    | 22.688678      | 23.4563754     | 22.9417412     | 4.692E-15 | 1.36912  | up        | PREDICTED: ER membrane protein complex subunit 4-like [Fragaria vesca subsp. vesca]               |
| c27004.graph_c1 | 4.7158969     | 4.50105548    | 3.94612089    | 43.919655      | 38.3598751     | 41.1715146     | 7.707E-28 | 2.14115  | up        | PREDICTED: membrin-11 [Sesamum indicum]                                                           |
| c27007.graph_c0 | 1.44852102    | 1.20830958    | 1.08582067    | 10.9664242     | 8.55502809     | 9.16327692     | 1.556E-06 | 1.85086  | up        | -                                                                                                 |
| c27014.graph_c0 | 1.38727706    | 1.41589495    | 1.36324572    | 19.1372645     | 20.7599772     | 21.084626      | 3.325E-75 | 2.78144  | up        | PREDICTED: lysosomal beta glucosidase-like [Sesamum indicum]                                      |
| c27015.graph_c0 | 3.40258416    | 5.03494371    | 2.70902125    | 3.06434299     | 3.858978       | 3.70685024     | 0.0069311 | -1.15505 | down      | PREDICTED: uncharacterized protein LOC105163552 [Sesamum indicum]                                 |
| c27017.graph_c0 | 26.4437438    | 25.7548118    | 24.9051826    | 14.5136745     | 13.7390204     | 13.7379263     | 8.126E-82 | -1.96664 | down      | PREDICTED: monoglyceride lipase [Sesamum indicum]                                                 |
| c27018.graph_c0 | 3.2162122     | 3.01172741    | 3.11083011    | 2.31238982     | 2.22403671     | 2.35861401     | 7.714E-11 | -1.52774 | down      | PREDICTED: vesicle-associated protein 2-2-like [Sesamum indicum]                                  |
| c27022.graph_c1 | 11.7363788    | 12.7271419    | 10.6444051    | 9.4293471      | 8.99844897     | 8.93719081     | 9.452E-42 | -1.44862 | down      | PREDICTED: uncharacterized protein LOC105173472 isoform X1 [Sesamum indicum]                      |
| c27023.graph_c0 | 0             | 0.06195051    | 0.07952923    | 12.4145451     | 13.3210429     | 12.7361163     | 1.318E-45 | 6.97781  | up        | PREDICTED: UPF0483 protein C25G4.2-like [Sesamum indicum]                                         |
| c27028.graph_c0 | 3.09944386    | 4.48145748    | 4.42545342    | 0.12514766     | 0.56498303     | 0.10211947     | 5.216E-22 | -5.0216  | down      | PREDICTED: protein UPS IREAM OF FLC-like [Sesamum indicum]                                        |
| c27031.graph_c0 | 17.3178179    | 21.69316      | 18.0270494    | 17.1570035     | 13.7134908     | 15.3196445     | 6.316E-14 | -1.39454 | down      | PREDICTED: uncharacterized protein LOC104093193 [Nicotiana tomentosiformis]                       |
| c27035.graph_c0 | 8.47105347    | 7.64548323    | 6.87044434    | 4.23904818     | 5.42223934     | 6.25919479     | 3.072E-14 | -1.61691 | down      | hypothetical protein MIMGU_mgv1a015/60mg [Erythranthe outtata]                                    |
| c27037.graph_c0 | 1.9051786     | 2.20979847    | 1.90417884    | 11.3191509     | 12.2840033     | 10.097197      | 3.267E-15 | 1.39423  | up        | PREDICTED: metal transporter Nramp5-like isoform X2 [Sesamum indicum]                             |
| c27038.graph_c0 | 0.51375486    | 0.42855776    | 0.22006511    | 2.24036442     | 1.6576042      | 1.95507179     | 0.0049947 | 1.25138  | up        | PREDICTED: uncharacterized protein LOC105163339 [Sesamum indicum]                                 |
| c27043.graph_c0 | 1.68280096    | 2.52672905    | 2.04232887    | 0.67947224     | 0.49079978     | 0.60988818     | 5.677E-12 | -2.90345 | down      | PREDICTED: lysine histidine transporter 1-like [Musa acuminata subsp. malaccensis]                |
| c27050.graph_c0 | 14.2419932    | 14.3755536    | 15.5448101    | 8.14220809     | 8.79851789     | 10.5314077     | 5.405E-33 | -1.77554 | down      | hypothetical protein MIMGU_mgv1a016029mg [Erythranthe outtata]                                    |
| c27052.graph_c0 | 282.016234    | 255.957385    | 280.989177    | 28.6521853     | 27.1735234     | 45.1992721     | 3.08E-205 | -4.10736 | down      | PREDICTED: L-idonate 5-dehydrogenase-like [Cucumis sativus]                                       |



| #ID             | 0 h-1<br>FPKM | 0 h-2<br>FPKM | 0 h-3<br>FPKM | 28 h-1<br>FPKM | 28 h-2<br>FPKM | 28 h-3<br>FPKM | FDR       | log2FC   | regulated | nr_annotation                                                                                     |
|-----------------|---------------|---------------|---------------|----------------|----------------|----------------|-----------|----------|-----------|---------------------------------------------------------------------------------------------------|
| c27054.graph_c0 | 0.29370099    | 0.17639705    | 0.07548348    | 1.66498945     | 1.50332937     | 1.49796321     | 5.32E-05  | 2.01992  | up        | PREDICTED: uncharacterized protein LOC105156067 [Sesamum indicum]                                 |
| c27056.graph_c0 | 0             | 0             | 0             | 3.95788071     | 4.31162029     | 4.51090638     | 4.549E-35 | Inf      | up        | PREDICTED: probable polygalacturonase non-catalytic subunit JP650 [Sesamum indicum]               |
| c27058.graph_c0 | 0.25070779    | 0.32266135    | 0.32216943    | 1.40564294     | 1.69221838     | 1.5080836      | 0.0027481 | 1.26933  | up        | PREDICTED: pentatricopeptide repeat-containing protein At5g42450, mitochondrial [Sesamum indicum] |
| c27063.graph_c0 | 0.33207294    | 0.16620273    | 0.24892401    | 7.6427087      | 7.40911829     | 6.48256109     | 8.248E-38 | 3.76029  | up        | PREDICTED: uncharacterized protein LOC105165907 [Sesamum indicum]                                 |
| c27067.graph_c0 | 28.0643843    | 29.9903109    | 25.566529     | 29.4812826     | 28.2162713     | 28.9982683     | 1.559E-33 | -1.03699 | down      | PREDICTED: probable beta-1,3-galactosyltransferase 19 [Sesamum indicum]                           |
| c27068.graph_c0 | 0             | 0             | 0             | 6.84984501     | 8.21558709     | 12.6804698     | 3.366E-10 | Inf      | up        | --                                                                                                |
| c27069.graph_c0 | 2.4004483     | 2.24266185    | 1.64515792    | 2.67510238     | 1.57523911     | 2.37267576     | 0.0040544 | -1.01012 | down      | hypothetical protein MIMGU_mgv1a001252mg [Erythranthe outtata]                                    |
| c27070.graph_c0 | 0.27931492    | 0.59413856    | 0.35893074    | 2.66443376     | 2.88688064     | 3.4786499      | 1.15E-06  | 1.78344  | up        | PREDICTED: uncharacterized protein LOC105177060 [Sesamum indicum]                                 |
| c27071.graph_c0 | 2.01053102    | 3.45007588    | 2.46058282    | 22.8696027     | 21.5496258     | 21.0650591     | 2.621E-43 | 1.95594  | up        | PREDICTED: uncharacterized protein LOC105167501 [Sesamum indicum]                                 |
| c27072.graph_c0 | 110.208019    | 110.008119    | 100.540574    | 53.2595845     | 48.1465241     | 49.3940212     | 1.91E-155 | -2.17822 | down      | PREDICTED: growth-regulating factor 8 isoform x2 [Sesamum indicum]                                |
| c27073.graph_c0 | 2.75900836    | 1.87405895    | 2.91232159    | 13.0340039     | 13.4496954     | 12.5640811     | 1.797E-10 | 1.27889  | up        | PREDICTED: uncharacterized protein LOC105170966 [Sesamum indicum]                                 |
| c27077.graph_c0 | 0.89516456    | 0.83426362    | 0.79332544    | 9.40005463     | 10.2901741     | 8.54907343     | 9.841E-27 | 2.39474  | up        | PREDICTED: LOW QUALITY PROTEIN: 4-coumarate--CoA ligase-like 7 [Sesamum indicum]                  |
| c27079.graph_c0 | 6.95490107    | 6.42113795    | 7.07176547    | 213.184205     | 204.360596     | 212.119694     | 0         | 3.85367  | up        | hypothetical protein MIMGU_mgv1a008423mg [Erythranthe outtata]                                    |
| c27082.graph_c0 | 32.4560732    | 31.4931015    | 34.4463121    | 16.9853127     | 18.5101633     | 18.1223917     | 7.12E-70  | -1.9673  | down      | PREDICTED: probable BOI-related E3 ubiquitin-protein ligase 2 [Sesamum indicum]                   |
| c27085.graph_c0 | 31.8839211    | 24.8918969    | 25.3109504    | 0.35788494     | 0.32313655     | 0.29203119     | 7.24E-99  | -7.48719 | down      | -                                                                                                 |
| c27086.graph_c0 | 0             | 0             | 0             | 3.23981534     | 3.16902029     | 2.20305239     | 1.194E-15 | Inf      | up        | PREDICTED: flavonoid 3',5'-methyltransferase-like [Sesamum indicum]                               |
| c27087.graph_c0 | 0.41980472    | 0.14007503    | 0.26973284    | 6.63617837     | 6.84126577     | 6.14122582     | 3.565E-26 | 3.47692  | up        | PREDICTED: 3-ketoacyl-CoA thiolase 2, peroxisomal [Sesamum indicum]                               |
| c27090.graph_c0 | 0.21709742    | 0.21731481    | 0.09299293    | 3.05051294     | 2.89679237     | 2.44627651     | 6.146E-08 | 2.91038  | up        | PREDICTED: uncharacterized protein LOC103992241 isoform X1 [Musa acuminata subsp. malaccensis]    |
| c27097.graph_c0 | 9.88172009    | 5.50240971    | 5.83881486    | 0              | 0              | 0              | 8.555E-27 | -Inf     | down      | --                                                                                                |
| c27099.graph_c0 | 0.32293863    | 0.25860961    | 0.74698007    | 7.65154396     | 6.9086268      | 6.70324873     | 1.382E-14 | 2.89644  | up        | PREDICTED: GDSL esterase/lipase CPRD49-like [Sesamum indicum]                                     |
| c27099.graph_c1 | 0.5003733     | 0             | 0             | 6.18236332     | 6.23881141     | 6.13284303     | 1.034E-10 | 4.15363  | up        | PREDICTED: GDSL esterase/lipase CPRD49-like [Sesamum indicum]                                     |
| c27102.graph_c0 | 11.3355401    | 8.54902738    | 10.5757636    | 46.798287      | 49.9648863     | 49.3914109     | 4.889E-26 | 1.17217  | up        | PREDICTED: ATP-dependent Clp protease proteolytic subunit 3, chloroplastic [Sesamum indicum]      |

| #ID             | 0 h-1<br>FPKM | 0 h-2<br>FPKM | 0 h-3<br>FPKM | 28 h-1<br>FPKM | 28 h-2<br>FPKM | 28 h-3<br>FPKM | FDR       | log2FC   | regulated | nr_annotation                                                                                                                                                   |
|-----------------|---------------|---------------|---------------|----------------|----------------|----------------|-----------|----------|-----------|-----------------------------------------------------------------------------------------------------------------------------------------------------------------|
| c27104.graph_c0 | 0.30035216    | 0.60130584    | 0.77192884    | 5.08313682     | 5.51877797     | 5.92906114     | 5.053E-12 | 2.20439  | up        | PREDICTED: protein GLUTAMINE DUMPER 5-like [Sesamum indicum]                                                                                                    |
| c27105.graph_c0 | 0.04911234    | 0.14748455    | 0.0631113     | 4.53320953     | 4.80209775     | 5.18451204     | 6.848E-20 | 4.71609  | up        | PREDICTED: squamosa promoter-binding-like protein 9 [Sesamum indicum]                                                                                           |
| c27114.graph_c0 | 5.58817179    | 5.91524839    | 4.95242896    | 39.4941102     | 44.0474647     | 44.0357723     | 2.652E-39 | 1.86604  | up        | PREDICTED: 14-3-3-like protein 16R [Sesamum indicum]                                                                                                            |
| c27115.graph_c0 | 10.8440727    | 11.3338255    | 13.7301354    | 7.76550649     | 8.16267005     | 8.98471699     | 6.453E-10 | -1.62052 | down      | -                                                                                                                                                               |
| c27116.graph_c0 | 2.22823056    | 1.21661552    | 2.16921552    | 20.169702      | 20.4711524     | 19.4616538     | 1.142E-25 | 2.32837  | up        | PREDICTED: growth-regulating factor 6-like [Sesamum indicum]                                                                                                    |
| c27117.graph_c0 | 5.15371226    | 5.6610641     | 6.0366425     | 61.8535796     | 51.4483831     | 56.8283523     | 7.58E-44  | 2.24349  | up        | PREDICTED: very-long-chain 3-oxoacyl-CoA reductase 1-like [Sesamum indicum]                                                                                     |
| c27118.graph_c0 | 26.4244873    | 27.8541252    | 23.3635861    | 21.8053893     | 23.6011533     | 22.7189811     | 9.867E-37 | -1.27752 | down      | PREDICTED: LOW QUALITY PROTEIN: putative SWI/SNF-related matrix-associated actin-dependent regulator of chromatin subfamily A member 3-like 1 [Sesamum indicum] |
| c27119.graph_c0 | 4.41421521    | 2.70027718    | 3.62405973    | 18.6255353     | 16.8975767     | 15.9981944     | 1.848E-05 | 1.17296  | up        | -                                                                                                                                                               |
| c27120.graph_c0 | 0.65255488    | 0.6205479     | 0.37735148    | 4.90872684     | 4.90316668     | 5.7082942      | 7.276E-13 | 2.14995  | up        | PREDICTED: aureusidin synthase-like [Sesamum indicum]                                                                                                           |
| c27121.graph_c0 | 172.753427    | 189.200933    | 170.704446    | 23.8007952     | 25.3833484     | 26.4586033     | 0         | -3.90576 | down      | PREDICTED: uncharacterized protein LOC105159027 [Sesamum indicum]                                                                                               |
| c27129.graph_c0 | 0             | 0             | 0             | 2.50583191     | 3.28226367     | 3.11030626     | 2.635E-18 | Inf      | up        | PREDICTED: kinesin-like protein NACK1 [Sesamum indicum]                                                                                                         |
| c27130.graph_c0 | 0.02561602    | 0             | 0             | 0.59576243     | 0.75644665     | 1.33687751     | 3.663E-05 | 5.65841  | up        | gelsolin with villin headpeace [Emiliana huxleyi CCMP1516]                                                                                                      |
| c27132.graph_c0 | 1.13231781    | 1.29537332    | 1.03933801    | 13.402525      | 14.9673027     | 17.4597883     | 2.034E-19 | 2.63639  | up        | hypothetical protein MIMGU_mgv1a012883mg [Erythranthe                                                                                                           |
| c27143.graph_c0 | 138.692907    | 145.008625    | 139.333365    | 106.033471     | 120.130817     | 112.052232     | 1.228E-66 | -1.41347 | down      | hypothetical protein MIMGU_mgv1a010222mg [Erythranthe                                                                                                           |
| c27150.graph_c0 | 1.68049299    | 1.17361099    | 1.65729072    | 0              | 0              | 0              | 7.328E-37 | -Inf     | down      | mRNA cleavage factor complex subunit [Schizosaccharomyces japonicus yFS275]                                                                                     |
| c27151.graph_c0 | 138.37461     | 137.403401    | 140.775385    | 26.4392496     | 29.5105411     | 27.1218662     | 0         | -3.41712 | down      | PREDICTED: probable protein phosphatase 2C b3 [Sesamum indicum]                                                                                                 |
| c27152.graph_c0 | 1.44769156    | 1.16736375    | 1.55028414    | 0              | 0              | 0              | 1.235E-36 | -Inf     | down      | hypothetical protein KNAG_OE02970 [Kazachstania naganishii CBS 8797]                                                                                            |
| c27155.graph_c1 | 3.96400649    | 4.21597433    | 3.37471225    | 29.4764059     | 28.223978      | 25.6393548     | 3.224E-54 | 1.7617   | up        | PREDICTED: plant intracellular Ras-group-related LRR protein 5-like [Sesamum indicum]                                                                           |
| c27157.graph_c0 | 1.54452424    | 1.11660672    | 0.90049968    | 13.9383455     | 13.7675042     | 12.518567      | 5.752E-74 | 2.41266  | up        | PREDICTED: serine/threonine-protein kinase D6PKL1-like [Sesamum indicum]                                                                                        |
| c27158.graph_c0 | 562.953248    | 538.606693    | 581.511915    | 143.561816     | 171.265479     | 175.764025     | 1.99E-151 | -2.86924 | down      | hypothetical protein MIMGU_mgv1a015159mg [Erythranthe                                                                                                           |
| c27160.graph_c0 | 0.41872408    | 0.7335009     | 0.58291677    | 7.50671414     | 7.85407315     | 7.11872837     | 1.666E-21 | 2.60234  | up        | PREDICTED: NAC domain-containing protein 8 [Sesamum indicum]                                                                                                    |
| c27165.graph_c0 | 13.2215243    | 13.8147732    | 12.6805875    | 6.84010573     | 7.086239       | 6.95601165     | 1.838E-96 | -2.01738 | down      | PREDICTED: uncharacterized protein LOC105161407 [Sesamum indicum]                                                                                               |
| c27166.graph_c0 | 19.0175871    | 20.5880738    | 16.9022966    | 7.00227032     | 7.00961027     | 7.85025803     | 5.871E-67 | -2.45826 | down      | PREDICTED: probable LRR receptor-like serine/threonine-protein kinase RLK [Sesamum indicum]                                                                     |

| #ID             | 0 h-1<br>FPKM | 0 h-2<br>FPKM | 0 h-3<br>FPKM | 28 h-1<br>FPKM | 28 h-2<br>FPKM | 28 h-3<br>FPKM | FDR       | log2FC   | regulated | nr_annotation                                                                  |
|-----------------|---------------|---------------|---------------|----------------|----------------|----------------|-----------|----------|-----------|--------------------------------------------------------------------------------|
| c27168.graph_c0 | 28.9551007    | 29.3347089    | 31.2070877    | 33.4334424     | 29.3444721     | 29.9818607     | 1.335E-14 | -1.03996 | down      | PREDICTED: NAC domain-containing protein 78 isoform X2 [Sesamum indicum]       |
| c27171.graph_c0 | 0             | 0.10623295    | 0.06818849    | 2.50679837     | 2.40269029     | 2.29728417     | 5.87E-12  | 4.2676   | up        | PREDICTED: short-chain dehydrogenase TIC 32, chloroplastic [Sesamum indicum]   |
| c27176.graph_c0 | 3.62223083    | 3.77693536    | 2.61827439    | 1.64538531     | 3.11982019     | 1.74540726     | 5.476E-08 | -1.71006 | down      | PREDICTED: phospholipase A1-Ibata2, chloroplastic [Sesamum indicum]            |
| c27178.graph_c0 | 83.9686391    | 74.4664161    | 82.4040443    | 58.5778968     | 64.8811739     | 61.4072852     | 1.441E-43 | -1.47234 | down      | PREDICTED: multiprotein-bridging factor 1b-like [Sesamum indicum]              |
| c27180.graph_c0 | 0.1196463     | 0             | 0             | 7.79725549     | 8.76752366     | 9.12982813     | 1.264E-45 | 6.68803  | up        | PREDICTED: uncharacterized protein LOC105169888 [Sesamum indicum]              |
| c27182.graph_c0 | 0             | 0             | 0             | 2.31477376     | 2.56898743     | 2.59715016     | 1.513E-14 | Inf      | up        | PREDICTED: neme oxygenase 1, chloroplastic-like [Sesamum indicum]              |
| c27183.graph_c0 | 1.22659341    | 1.49640765    | 1.42845037    | 8.85909268     | 9.30693121     | 8.04731867     | 7.301E-12 | 1.56607  | up        | PREDICTED: putative MO25-like protein At5g47540 [Sesamum indicum]              |
| c27185.graph_c0 | 49.7589501    | 46.0797769    | 48.726024     | 18.6624385     | 20.6046736     | 20.9094576     | 7.606E-74 | -2.35471 | down      | hypothetical protein MIMGU_mgv1a01598/mg [Erythranthe outtata]                 |
| c27186.graph_c0 | 43.0350575    | 40.4286972    | 41.5707937    | 30.3514149     | 31.0069491     | 31.9755368     | 1.41E-40  | -1.51194 | down      | PREDICTED: homeobox-leucine zipper protein HAT4-like [Sesamum indicum]         |
| c27187.graph_c0 | 5.13882144    | 4.53879458    | 5.16078805    | 28.7490511     | 27.9130264     | 31.0396255     | 6.653E-29 | 1.47277  | up        | biotin carboxyl carrier protein subunit [Camellia chekiangoleosa]              |
| c27197.graph_c0 | 0.03628889    | 0.01816261    | 0.09326532    | 0.51430385     | 0.35720627     | 0.40890703     | 1.227E-05 | 2.0087   | up        | PREDICTED: uncharacterized protein LOC105158016 [Sesamum indicum]              |
| c27200.graph_c0 | 0.43515993    | 0.47519528    | 0.47447081    | 5.2424435      | 5.20072103     | 5.5525259      | 7.634E-36 | 2.43878  | up        | hypothetical protein MIMGU_mgv1a000504mg [Erythranthe outtata]                 |
| c27204.graph_c0 | 0             | 0.11023399    | 0.09434223    | 16.5410391     | 14.0678135     | 13.9545212     | 8.569E-85 | 6.66255  | up        | PREDICTED: serine/threonine-protein kinase-like protein ACR4 [Sesamum indicum] |
| c27212.graph_c0 | 48.8195597    | 54.169429     | 46.8386391    | 17.5905408     | 13.6291791     | 16.1448878     | 1.04E-105 | -2.75073 | down      | PREDICTED: uncharacterized protein LOC105171942 [Sesamum indicum]              |
| c27216.graph_c0 | 0.52483189    | 0.85370582    | 0.33721488    | 7.24745106     | 6.1563088      | 5.36916317     | 1.035E-09 | 2.36643  | up        | PREDICTED: GDSL esterase/lipase CPRD49-like isoform X1 [Sesamum indicum]       |
| c27217.graph_c0 | 0.4430605     | 0.49894218    | 0.35584393    | 3.22013819     | 2.76210872     | 2.95605727     | 7.744E-05 | 1.6965   | up        | -                                                                              |
| c27218.graph_c0 | 0.89082739    | 1.48619903    | 1.14474846    | 46.0407617     | 46.875059      | 45.2979011     | 1.47E-197 | 4.20237  | up        | PREDICTED: glucan endo-1,3-beta-glucosidase 13-like [Sesamum indicum]          |
| c27220.graph_c0 | 1.11348969    | 0.97950108    | 0.82383904    | 0.22071215     | 0.11071243     | 0.14007724     | 2.066E-18 | -3.71618 | down      | -                                                                              |
| c27222.graph_c0 | 1.88874381    | 1.96477765    | 1.80843533    | 19.8910996     | 20.0255392     | 18.4712447     | 1.056E-41 | 2.27606  | up        | hypothetical protein MIMGU_mgv1a0006095mg [Erythranthe outtata]                |
| c27224.graph_c0 | 19.5930506    | 17.7634754    | 15.1426758    | 13.1009069     | 12.5819722     | 14.1263794     | 6.16E-22  | -1.48614 | down      | PREDICTED: uncharacterized protein LOC105158173 [Sesamum indicum]              |
| c27230.graph_c0 | 5.36102275    | 5.9030301     | 4.97001268    | 71.9991746     | 82.0710377     | 72.9217709     | 3.39E-101 | 2.71588  | up        | PREDICTED: BAG family molecular chaperone regulator 7 [Sesamum indicum]        |
| c27232.graph_c0 | 0.97101237    | 1.20340962    | 1.30720789    | 6.11629371     | 5.18866593     | 4.85373458     | 0.0001188 | 1.12009  | up        | 1-aminocyclopropane-1-carboxylate oxidase-like protein [Medicago truncatula]   |

| #ID             | 0 h-1<br>FPKM | 0 h-2<br>FPKM | 0 h-3<br>FPKM | 28 h-1<br>FPKM | 28 h-2<br>FPKM | 28 h-3<br>FPKM | FDR       | log2FC   | regulated | nr_annotation                                                                                    |
|-----------------|---------------|---------------|---------------|----------------|----------------|----------------|-----------|----------|-----------|--------------------------------------------------------------------------------------------------|
| c27233.graph_c1 | 15.7967045    | 15.1800216    | 15.3695387    | 4.59238152     | 3.58375202     | 3.55997853     | 4.35E-106 | -3.07221 | down      | hypothetical protein MIMGU_mgv1a022117mg [Erythranthe outtata]                                   |
| c27235.graph_c1 | 0.38645154    | 0.25789234    | 0.33107035    | 5.43016786     | 7.26986536     | 5.11853735     | 3.599E-09 | 3.10051  | up        | PREDICTED: enolase-like [Sesamum indicum]                                                        |
| c27237.graph_c0 | 6.85949209    | 6.67294221    | 6.60483163    | 6.12296209     | 6.1244186      | 6.02763072     | 6.467E-25 | -1.2302  | down      | PREDICTED: U-box domain-containing protein 45 [Sesamum indicum]                                  |
| c27239.graph_c0 | 0.11329592    | 0.34022811    | 0.14558974    | 3.95245549     | 2.00739191     | 2.88921605     | 0.0001888 | 2.79571  | up        | hypothetical protein MIMGU_mgv1a019829mg [Erythranthe outtata]                                   |
| c27244.graph_c0 | 18.9355193    | 17.0427624    | 17.9624782    | 120.58191      | 124.393326     | 125.432282     | 7.496E-87 | 1.68962  | up        | PREDICTED: ATP synthase subunit gamma, mitochondrial [Sesamum indicum]                           |
| c27255.graph_c0 | 0.4255344     | 0.73021801    | 0.54682855    | 5.30187336     | 3.15150391     | 4.65075677     | 4.075E-05 | 1.85331  | up        | PREDICTED: uncharacterized protein LOC105159742 [Sesamum indicum]                                |
| c27256.graph_c0 | 2.70946149    | 1.59539683    | 1.63847778    | 8.45606663     | 9.41305726     | 8.97955788     | 0.0066662 | 1.09047  | up        | hypothetical protein M569_10374, partial [Genlisea aurea]                                        |
| c27258.graph_c0 | 3.07647529    | 2.5662966     | 1.67719684    | 0.3387825      | 0.45883325     | 0.46995438     | 7.785E-12 | -3.61269 | down      | -                                                                                                |
| c27260.graph_c0 | 0             | 0             | 0.11933787    | 2.26109111     | 1.43213438     | 2.5610144      | 1.172E-08 | 4.58354  | up        | PREDICTED: WALL-related protein At1g43650-like [Sesamum indicum]                                 |
| c27262.graph_c0 | 7.37727859    | 7.68005245    | 7.58407605    | 48.9623633     | 47.9104944     | 47.7355177     | 1.953E-75 | 1.58427  | up        | PREDICTED: ER membrane protein complex subunit 1 [Sesamum indicum]                               |
| c27264.graph_c0 | 0.75378519    | 0.51739885    | 1.27307472    | 0.26609698     | 0.14132978     | 0.22990549     | 0.0014645 | -3.09555 | down      | PREDICTED: probable leucine-rich repeat receptor-like protein kinase At5g63930 [Sesamum indicum] |
| c27265.graph_c0 | 5.21926027    | 5.5443531     | 3.55879303    | 28.1015953     | 26.6312763     | 27.2262252     | 4.471E-11 | 1.43097  | up        | PREDICTED: probable methyltransferase PM111 [Sesamum indicum]                                    |
| c27266.graph_c0 | 0.04928634    | 0.09867138    | 0             | 8.8119722      | 11.837548      | 11.4580283     | 9.581E-37 | 6.68772  | up        | PREDICTED: palmitoyl-protein thioesterase 1 [Sesamum indicum]                                    |
| c27273.graph_c0 | 2.51463262    | 2.30738809    | 2.87235776    | 35.486298      | 36.349577      | 32.5191353     | 5.417E-49 | 2.6684   | up        | unnamed protein product [Coffea canephora]                                                       |
| c27276.graph_c0 | 0.29370078    | 0.04199927    | 0.10783346    | 4.29969494     | 4.06118905     | 3.12282803     | 9.928E-21 | 3.61444  | up        | hypothetical protein PHAVU_002G220200g [Phaseolus vulgaris]                                      |
| c27279.graph_c0 | 2.68775679    | 2.12993814    | 2.15867118    | 0              | 0              | 0              | 2.335E-28 | -Inf     | down      | PREDICTED: inorganic phosphate transporter 1-11-like [Sesamum indicum]                           |
| c27280.graph_c0 | 4.0199322     | 2.12720223    | 2.00259004    | 0              | 0              | 0              | 2.392E-18 | -Inf     | down      | predicted protein [Hordeum vulgare subsp. vulgare]                                               |
| c27282.graph_c0 | 806.354253    | 753.647759    | 837.92116     | 198.994044     | 247.777846     | 231.646503     | 3.03E-105 | -2.91283 | down      | hypothetical protein MIMGU_mgv1a005561mg [Erythranthe outtata]                                   |
| c27283.graph_c0 | 45.0235688    | 47.2002786    | 43.4709866    | 345.889583     | 336.54131      | 314.645822     | 1.46E-108 | 1.78703  | up        | PREDICTED: blue copper protein-like [Nicotiana tomentosiformis]                                  |
| c27284.graph_c0 | 4.86722414    | 5.10410259    | 6.15529674    | 0.4492026      | 0.35488935     | 0.50400027     | 9.955E-41 | -4.71621 | down      | -                                                                                                |
| c27285.graph_c0 | 0.16678156    | 0.38954664    | 0.2857612     | 5.17187725     | 5.03454214     | 5.275262       | 2.04E-13  | 3.10675  | up        | PREDICTED: protein XRI1-like [Sesamum indicum]                                                   |
| c27290.graph_c0 | 1.76571973    | 1.61153302    | 1.93534039    | 13.5502958     | 13.1207214     | 15.030034      | 1.019E-17 | 1.88112  | up        | -                                                                                                |
| c27300.graph_c0 | 3.3095266     | 2.98155653    | 2.4099612     | 2.04454313     | 2.46137434     | 2.06087885     | 2.366E-07 | -1.49332 | down      | PREDICTED: uncharacterized protein LOC105168317 [Sesamum indicum]                                |
| c27312.graph_c0 | 2.18560687    | 2.22907458    | 1.90772243    | 9.74071896     | 10.3915787     | 10.5407311     | 1.42E-08  | 1.18987  | up        | PREDICTED: uncharacterized protein LOC105166961 [Sesamum indicum]                                |
| c27313.graph_c0 | 10.1805561    | 7.69113235    | 11.3545511    | 41.4632705     | 48.0258142     | 45.4533413     | 6.673E-08 | 1.11404  | up        | unnamed protein product [Coffea canephora]                                                       |

| #ID             | 0 h-1<br>FPKM | 0 h-2<br>FPKM | 0 h-3<br>FPKM | 28 h-1<br>FPKM | 28 h-2<br>FPKM | 28 h-3<br>FPKM | FDR       | log2FC   | regulated | nr_annotation                                                                                  |
|-----------------|---------------|---------------|---------------|----------------|----------------|----------------|-----------|----------|-----------|------------------------------------------------------------------------------------------------|
| c27314.graph_c0 | 6.78563859    | 7.7220821     | 6.64091813    | 40.292395      | 40.5284493     | 40.4559903     | 9.911E-62 | 1.42978  | up        | PREDICTED: carbamoyl-phosphate synthase large chain, chloroplastic [Sesamum indicum]           |
| c27317.graph_c0 | 0.08865708    | 0.17749172    | 0             | 5.02596563     | 5.58520091     | 6.99298128     | 1.168E-15 | 4.97471  | up        | PREDICTED: transcription factor bHLH/9-like [Sesamum indicum]                                  |
| c27318.graph_c0 | 28.8449762    | 32.9883852    | 29.8388838    | 2.83018893     | 4.02238141     | 3.37858284     | 1.58E-158 | -4.25449 | down      | hypothetical protein MIMGU_mgv1a022206mg [Erythranthe outtata]                                 |
| c27319.graph_c0 | 0.40234334    | 0.33562186    | 0.34468475    | 2.7048926      | 4.24645974     | 3.28092878     | 8.342E-08 | 2.15085  | up        | hypothetical protein MIMGU_mgv1a005421mg [Erythranthe outtata]                                 |
| c27323.graph_c0 | 3.3804496     | 4.59854447    | 4.12124175    | 27.0888014     | 34.8109127     | 28.3242712     | 1.245E-15 | 1.80571  | up        | 1-deoxy-D-xylulose 5-phosphate reductoisomerase [Lavandula angustifolia]                       |
| c27324.graph_c0 | 42.3037815    | 43.5208323    | 39.1715604    | 28.1458279     | 25.8450466     | 26.0731353     | 1.859E-94 | -1.7322  | down      | PREDICTED: lysM domain receptor-like kinase 5 [Sesamum indicum]                                |
| c27328.graph_c0 | 0.37027189    | 0.48468656    | 0.47581404    | 2.09078915     | 1.88778658     | 1.72295863     | 0.0057921 | 1.00554  | up        | PREDICTED: protein ROOT PRIMORDIUM DEFECTIVE 1 [Sesamum indicum]                               |
| c27330.graph_c0 | 8.78339159    | 8.31693348    | 7.62635536    | 4.83092202     | 4.67343176     | 3.51963653     | 1.216E-08 | -2.01506 | down      | PREDICTED: 1-complex protein 1 subunit alpha [Sesamum indicum]                                 |
| c27332.graph_c0 | 0             | 0             | 0             | 1.90356985     | 2.3680488      | 3.00304174     | 2.391E-13 | Inf      | up        | predicted protein [Hordeum vulgare subsp. vulgare]                                             |
| c27334.graph_c0 | 0.65362323    | 0.73606245    | 0.20998293    | 3.08782238     | 3.91394287     | 3.5371839      | 0.0004119 | 1.64082  | up        | PREDICTED: uncharacterized protein LOC105170524 [Sesamum indicum]                              |
| c27335.graph_c0 | 8.7574214     | 8.31014604    | 8.97688662    | 38.8880895     | 45.5097911     | 42.7501282     | 9.916E-25 | 1.19634  | up        | PREDICTED: L-ascorbate oxidase homolog [Sesamum indicum]                                       |
| c27337.graph_c0 | 0.04464943    | 0.04469414    | 0             | 0.97352836     | 0.87900483     | 1.16510708     | 5.257E-09 | 4.00881  | up        | PREDICTED: uncharacterized protein LOC105180005 [Sesamum indicum]                              |
| c27340.graph_c0 | 100.811686    | 100.912633    | 98.9307675    | 478.992997     | 505.929895     | 498.561832     | 2.635E-53 | 1.21252  | up        | PREDICTED: 60S ribosomal protein L22-2-like [Sesamum indicum]                                  |
| c27341.graph_c0 | 1.52639033    | 0.9822335     | 0.84063086    | 8.08256522     | 10.0165863     | 8.27646395     | 9.898E-07 | 1.89292  | up        | hypothetical protein MIMGU_mgv1a00426/mg [Erythranthe outtata]                                 |
| c27342.graph_c0 | 4.64636634    | 3.89387635    | 4.95249476    | 35.2616645     | 34.745231      | 36.8690389     | 4.736E-57 | 1.89399  | up        | PREDICTED: pyruvate dehydrogenase E1 component subunit beta-like [Sesamum indicum]             |
| c27344.graph_c0 | 4.76048247    | 6.31913503    | 4.78753704    | 4.249649       | 7.02890409     | 4.35761417     | 0.0001252 | -1.11257 | down      | PREDICTED: UDP-glycosyltransferase 86A1-like [Sesamum indicum]                                 |
| c27346.graph_c0 | 4.71467144    | 5.16784153    | 5.42801273    | 25.7692425     | 24.4991681     | 22.4698104     | 5.814E-29 | 1.15555  | up        | PREDICTED: filament-like plant protein 4 [Sesamum indicum]                                     |
| c27349.graph_c0 | 4.4570799     | 2.43563826    | 3.0683165     | 0              | 0              | 0              | 1.215E-32 | -Inf     | down      | alpha-2 macroglobulin family-like protein [Micromonas sp. RCC299]                              |
| c27350.graph_c0 | 0.07439785    | 0             | 0             | 6.0019843      | 4.93101024     | 6.17711553     | 1.028E-19 | 6.78725  | up        | -                                                                                              |
| c27353.graph_c0 | 64.6405875    | 67.1728908    | 61.3753555    | 48.0255214     | 50.1477699     | 50.0109384     | 1.311E-72 | -1.47232 | down      | PREDICTED: xyloglucan 6-xylosyltransferase 2-like [Sesamum indicum]                            |
| c27356.graph_c0 | 6.4844187     | 5.75435449    | 5.20057205    | 42.2484213     | 43.9407476     | 40.3928301     | 3.063E-47 | 1.77135  | up        | PREDICTED: protein TRIGALACTOSYLDIACYLGLYCEROL 1, chloroplastic-like [Sesamum indicum]         |
| c27361.graph_c0 | 11.4866023    | 11.9153744    | 10.7729585    | 1.95244754     | 2.18839912     | 1.81293039     | 1.417E-96 | -3.61139 | down      | unnamed protein product [Coffea canephora]                                                     |
| c27363.graph_c0 | 43.6070316    | 38.3520579    | 51.9878631    | 11.541505      | 14.2253514     | 10.5389374     | 3.708E-19 | -2.97793 | down      | -                                                                                              |
| c27369.graph_c0 | 4.71124535    | 3.75678404    | 5.13062441    | 2.90178472     | 3.30124981     | 3.93060217     | 2.635E-07 | -1.51565 | down      | -                                                                                              |
| c27373.graph_c0 | 0.15111292    | 0.09075854    | 0.34953496    | 1.82314483     | 2.24111517     | 2.16877381     | 1.708E-08 | 2.29299  | up        | PREDICTED: probable glycerol-3-phosphate dehydrogenase [NAD(+)] 1, cytosolic [Sesamum indicum] |

| #ID             | 0 h-1<br>FPKM | 0 h-2<br>FPKM | 0 h-3<br>FPKM | 28 h-1<br>FPKM | 28 h-2<br>FPKM | 28 h-3<br>FPKM | FDR       | log2FC   | regulated | nr_annotation                                                                                  |
|-----------------|---------------|---------------|---------------|----------------|----------------|----------------|-----------|----------|-----------|------------------------------------------------------------------------------------------------|
| c27376.graph_c0 | 15.7918563    | 20.2768535    | 14.5558272    | 14.9627231     | 14.4865579     | 15.0534304     | 7.621E-08 | -1.27459 | down      | -                                                                                              |
| c27382.graph_c0 | 0.38009145    | 0.35120497    | 0.41328909    | 24.6923458     | 24.7315761     | 21.9347435     | 7.07E-141 | 4.86969  | up        | PREDICTED: protein NK11/PIK FAMILY 5.2-like [Sesamum indicum]                                  |
| c27384.graph_c0 | 54.5700025    | 54.3273114    | 49.4034993    | 12.6755351     | 13.8117533     | 15.4266195     | 2.57E-235 | -3.00574 | down      | unnamed protein product [Coffea canephora]                                                     |
| c27389.graph_c0 | 2.8235241     | 2.42258694    | 2.07333729    | 0.87948045     | 0.49157852     | 0.95686515     | 5.929E-15 | -2.73747 | down      | PREDICTED: expansin-A18-like [Sesamum indicum]                                                 |
| c27391.graph_c0 | 4.0257316     | 3.45408237    | 4.2230404     | 0.47769445     | 1.4556824      | 1.26683301     | 4.031E-17 | -2.96176 | down      | unnamed protein product [Coffea canephora]                                                     |
| c27391.graph_c1 | 4.07624457    | 3.62695672    | 3.37568742    | 0.79002428     | 1.3077494      | 1.02070116     | 9.246E-16 | -2.91785 | down      | serine glyoxylate aminotransferase 2 [Glycine max]                                             |
| c27395.graph_c0 | 0             | 0.1379293     | 0             | 4.75693214     | 4.38548611     | 4.33106826     | 2.218E-16 | 5.5282   | up        | PREDICTED: uncharacterized protein LOC100247103 isoform X1 [Vitis vinifera]                    |
| c27396.graph_c0 | 1665.78492    | 1427.69534    | 1516.48269    | 1220.08575     | 1249.27861     | 1362.20893     | 3.002E-36 | -1.35607 | down      | PREDICTED: abscisic acid &#x2013;hydroxylase 2 isoform X2 [Sesamum indicum]                    |
| c27400.graph_c0 | 9.40437917    | 11.4977664    | 8.25654551    | 60.6545342     | 59.170141      | 53.3679426     | 5.149E-34 | 1.48153  | up        | PREDICTED: ferredoxin--NADP reductase, root-type isozyme, chloroplastic-like [Sesamum indicum] |
| c27405.graph_c0 | 259.280677    | 273.745016    | 369.65664     | 291.284753     | 262.337665     | 273.633429     | 0.000318  | -1.22116 | down      | ATP synthase subunit alpha [Medicago truncatula]                                               |
| c27411.graph_c0 | 18.4209297    | 19.7246235    | 18.1830397    | 17.6732195     | 15.5273771     | 18.3373052     | 1.063E-38 | -1.21781 | down      | PREDICTED: ankyrin repeat and zinc finger domain-containing protein 1 [Sesamum indicum]        |
| c27412.graph_c0 | 0.63426819    | 0.81267624    | 0.45643345    | 3.13468077     | 2.91356762     | 3.05440237     | 0.000117  | 1.17188  | up        | PREDICTED: uncharacterized protein LOC105164594 [Sesamum indicum]                              |
| c27414.graph_c0 | 18.8857477    | 16.6935877    | 16.0846733    | 9.17745815     | 9.56678763     | 7.16123538     | 5.581E-74 | -2.08592 | down      | PREDICTED: LOW QUALITY PROTEIN: BAG family molecular chaperone regulator 2 [Sesamum indicum]   |
| c27419.graph_c1 | 59.3911928    | 52.2657175    | 56.158485     | 30.7465322     | 27.8446029     | 27.1231559     | 2.781E-90 | -2.05969 | down      | PREDICTED: uncharacterized protein LOC105161274 [Sesamum indicum]                              |
| c27420.graph_c1 | 1.15536398    | 1.67882067    | 1.10154305    | 7.47614452     | 6.89700228     | 7.89082905     | 6.302E-09 | 1.41171  | up        | PREDICTED: uncharacterized protein LOC105174515 [Sesamum indicum]                              |
| c27427.graph_c0 | 1.58099053    | 1.0550491     | 1.40279588    | 0              | 0              | 0              | 1.43E-36  | -Inf     | down      | DEAD-domain-containing protein [Punctularia strigosozonata HHB-11173 SS5]                      |
| c27428.graph_c0 | 0             | 0.14587534    | 0.2809021     | 4.71323069     | 5.40318439     | 3.32740165     | 3.714E-13 | 3.86154  | up        | PREDICTED: U-box domain-containing protein 26-like [Sesamum indicum]                           |
| c27434.graph_c0 | 1.41243565    | 1.18580967    | 0.93679264    | 8.11305718     | 9.86677097     | 8.48464964     | 3.558E-12 | 1.8181   | up        | PREDICTED: putative thiol protease ulp-4 [Sesamum indicum]                                     |
| c27437.graph_c0 | 0.22450844    | 0.0642095     | 0.08242921    | 7.15623327     | 6.86129936     | 6.60026542     | 8.21E-38  | 4.71656  | up        | hypothetical protein PHAVU_010G112100g [Phaseolus vulgaris]                                    |
| c27438.graph_c0 | 0.13861709    | 0.13875589    | 0             | 5.33954335     | 4.54821417     | 4.68585575     | 1.838E-11 | 4.64495  | up        | unknown [Lotus japonicus]                                                                      |
| c27438.graph_c1 | 0             | 0             | 0             | 9.62996924     | 12.2519881     | 11.889016      | 2.899E-32 | Inf      | up        | PREDICTED: auxin-induced protein IAA6 [Sesamum indicum]                                        |
| c27438.graph_c2 | 0.250355      | 0.50121139    | 0.32171609    | 7.15695847     | 8.87164509     | 7.07731197     | 2.95E-14  | 3.33622  | up        | PREDICTED: PGK5-like protein 1A, chloroplastic [Sesamum indicum]                               |
| c27439.graph_c1 | 0.40540756    | 0.20290676    | 0.39072358    | 10.1162439     | 11.7500739     | 10.939577      | 2.424E-49 | 3.94539  | up        | PREDICTED: uncharacterized protein LOC105174869 [Sesamum indicum]                              |

| #ID             | 0 h-1<br>FPKM | 0 h-2<br>FPKM | 0 h-3<br>FPKM | 28 h-1<br>FPKM | 28 h-2<br>FPKM | 28 h-3<br>FPKM | FDR       | log2FC   | regulated | nr_annotation                                                                                             |
|-----------------|---------------|---------------|---------------|----------------|----------------|----------------|-----------|----------|-----------|-----------------------------------------------------------------------------------------------------------|
| c27440.graph_c0 | 0.04680039    | 0.09369451    | 0.12028072    | 0.8503564      | 0.82921547     | 1.02694814     | 2.277E-05 | 2.27633  | up        | hypothetical protein MIMGU_mgv1a018556mg, partial [Erythranthe guttata]                                   |
| c27451.graph_c0 | 2.80558051    | 2.55308171    | 1.63876456    | 3.05861962     | 1.92478409     | 2.26891694     | 0.0056976 | -1.03256 | down      | PREDICTED: cyclic dof factor 1 [Sesamum indicum]                                                          |
| c27455.graph_c0 | 22.7763983    | 21.2974614    | 20.1550058    | 15.0668908     | 18.3474862     | 13.9930365     | 6.343E-18 | -1.52824 | down      | PREDICTED: pectinesterase 1 [Sesamum indicum]                                                             |
| c27456.graph_c0 | 716.622161    | 716.657582    | 798.109808    | 67.7173105     | 70.4622129     | 79.1345526     | 1.38E-130 | -4.45147 | down      | PREDICTED: CBL-interacting protein kinase 2 [Sesamum indicum]                                             |
| c27459.graph_c0 | 0.01683437    | 0             | 0             | 2.19008645     | 2.11000872     | 1.97678406     | 3.373E-29 | 7.48324  | up        | PREDICTED: filament-like plant protein 7 isoform X2 [Sesamum indicum]                                     |
| c27464.graph_c0 | 0.26442882    | 0.1764624     | 0.11326717    | 2.85074925     | 3.61511137     | 3.50235064     | 1.925E-11 | 3.08818  | up        | PREDICTED: rascicin-like arabinogalactan protein 2 [Sesamum indicum]                                      |
| c27465.graph_c0 | 12.7363586    | 12.353177     | 11.9954879    | 9.96581833     | 7.2850808      | 8.14766488     | 1.395E-50 | -1.63591 | down      | PREDICTED: uncharacterized protein LOC105174651 [Sesamum indicum]                                         |
| c27466.graph_c0 | 29.8422622    | 31.4036274    | 28.7930768    | 26.6391965     | 23.5992797     | 23.1618082     | 6.561E-65 | -1.38496 | down      | PREDICTED: flowering time control protein FPA [Sesamum indicum]                                           |
| c27470.graph_c1 | 7.12226207    | 7.45102073    | 6.19334577    | 3.50283994     | 3.76014174     | 4.0016043      | 2.668E-22 | -1.97067 | down      | PREDICTED: KING-H2 finger protein A1L43-like [Sesamum indicum]                                            |
| c27470.graph_c2 | 0.07236581    | 0.07243827    | 0             | 2.68234758     | 2.51688517     | 2.87544783     | 9.102E-12 | 4.73145  | up        | -                                                                                                         |
| c27474.graph_c0 | 19.1257073    | 23.0283355    | 19.6793256    | 1.08829176     | 1.6525973      | 1.29169046     | 2.92E-104 | -5.02962 | down      | PREDICTED: uncharacterized protein LOC105176742 [Sesamum indicum]                                         |
| c27475.graph_c0 | 38.3030693    | 36.6442182    | 41.4961418    | 177.393101     | 178.52787      | 181.453346     | 5.325E-39 | 1.11461  | up        | PREDICTED: 60S ribosomal protein L22-2 [Sesamum indicum]                                                  |
| c27476.graph_c0 | 0             | 0.08282376    | 0.31897602    | 2.10474646     | 2.44335692     | 2.50257864     | 9.85E-09  | 3.01324  | up        | hypothetical protein PRUPE_ppa003008mg [Prunus persica]                                                   |
| c27478.graph_c0 | 0.07219573    | 0.07226802    | 0.04638719    | 0.9182502      | 0.91200322     | 0.53520333     | 5.371E-06 | 2.54419  | up        | PREDICTED: probably inactive leucine-rich repeat receptor-like protein kinase At3g28040 [Sesamum indicum] |
| c27480.graph_c0 | 1.32360445    | 0.98520424    | 0.9594731     | 6.93124751     | 6.48098075     | 6.54145354     | 9.055E-10 | 1.52301  | up        | PREDICTED: pentatricopeptide repeat-containing protein At1g09190 [Sesamum indicum]                        |
| c27481.graph_c0 | 1.04726577    | 0.58239692    | 0.29906177    | 7.01946427     | 9.16325508     | 10.4895118     | 2.659E-09 | 2.71366  | up        | PREDICTED: 60S ribosomal protein L32-1-like [Brachypodium distachyon]                                     |
| c27481.graph_c1 | 4.41970067    | 2.39640176    | 3.0763906     | 19.0055934     | 20.7856779     | 18.457191      | 6.265E-06 | 1.47047  | up        | PREDICTED: 60S ribosomal protein L32-1-like [Sesamum indicum]                                             |
| c27482.graph_c0 | 4.83637779    | 8.06870114    | 5.14951917    | 3.95024835     | 3.71783541     | 3.93360455     | 0.000144  | -1.72751 | down      | PREDICTED: uncharacterized protein LOC105173594 [Sesamum indicum]                                         |
| c27486.graph_c0 | 28.0810388    | 28.8087069    | 25.2270163    | 15.8840344     | 18.3441548     | 15.071212      | 2.323E-57 | -1.82591 | down      | PREDICTED: probable membrane-associated kinase regulator 1 [Solanum lycopersicum]                         |
| c27490.graph_c0 | 0             | 0.03700263    | 0             | 10.5584927     | 11.8620811     | 10.0406231     | 1.178E-65 | 8.69458  | up        | PREDICTED: cytochrome P450 76A1 [Sesamum indicum]                                                         |
| c27492.graph_c0 | 3.22592452    | 1.63941705    | 3.69900865    | 0.68533975     | 0.58622924     | 0.64753137     | 2.836E-05 | -3.25209 | down      | PREDICTED: heat stress transcription factor A-6b-like [Sesamum indicum]                                   |
| c27498.graph_c0 | 1.8214495     | 2.31415471    | 1.98053707    | 8.85940407     | 12.2286792     | 8.72489821     | 3.453E-05 | 1.19318  | up        | unnamed protein product [Coffea canephora]                                                                |
| c27501.graph_c0 | 37.1437689    | 32.9831121    | 34.2936872    | 27.4708779     | 29.2353991     | 30.1356473     | 8.038E-44 | -1.35551 | down      | unknown [Picea sitchensis]                                                                                |

| #ID             | 0 h-1<br>FPKM | 0 h-2<br>FPKM | 0 h-3<br>FPKM | 28 h-1<br>FPKM | 28 h-2<br>FPKM | 28 h-3<br>FPKM | FDR       | log2FC   | regulated | nr_annotation                                                                                             |
|-----------------|---------------|---------------|---------------|----------------|----------------|----------------|-----------|----------|-----------|-----------------------------------------------------------------------------------------------------------|
| c27502.graph_c0 | 31.3811051    | 35.0796924    | 31.9688173    | 20.5165255     | 24.2272118     | 19.9582102     | 8.071E-56 | -1.69643 | down      | PREDICTED: calcium-dependent protein kinase 32 isoform X1 [Sesamum indicum]                               |
| c27503.graph_c0 | 3.44282208    | 3.37080379    | 4.32728321    | 1.33330144     | 1.15437306     | 0.80479461     | 2.169E-19 | -2.85419 | down      | hypothetical protein MIMGU_mgv1a026576mg, partial [Erythranthe guttata]                                   |
| c27505.graph_c0 | 0             | 0             | 0             | 2.65120636     | 3.63987364     | 3.31913188     | 7.345E-19 | Inf      | up        | plasma membrane intrinsic protein [Olea europaea]                                                         |
| c27507.graph_c0 | 1.36373328    | 0.85950668    | 0.71396162    | 15.4546525     | 15.2467625     | 14.3482348     | 8.761E-32 | 2.85553  | up        | PREDICTED: uncharacterized protein LOC105172180 [Sesamum indicum]                                         |
| c27508.graph_c0 | 0.25709585    | 0.20016367    | 0.25696094    | 3.52949812     | 3.11182221     | 4.04899972     | 4.128E-15 | 2.81363  | up        | -                                                                                                         |
| c27510.graph_c0 | 0.47363158    | 0.60956467    | 0.78253115    | 2.80303774     | 4.12933096     | 2.80891076     | 0.0015165 | 1.28649  | up        | PREDICTED: uncharacterized protein LOC105170878 [Sesamum indicum]                                         |
| c27511.graph_c0 | 227.333194    | 220.181959    | 209.626456    | 56.5850766     | 60.7060439     | 62.7963056     | 0         | -2.9568  | down      | PREDICTED: glutathione S-transferase-like [Sesamum indicum]                                               |
| c27512.graph_c0 | 28.5727871    | 29.0564207    | 28.5392492    | 24.1175009     | 26.3355585     | 27.9597856     | 4.24E-29  | -1.22613 | down      | PREDICTED: multiple myeloma tumor-associated protein 2 homolog [Sesamum indicum]                          |
| c27515.graph_c0 | 128.590267    | 134.819816    | 148.612866    | 48.9988085     | 46.5620247     | 43.1508938     | 5.527E-49 | -2.66344 | down      | hypothetical protein MIMGU_mgv1a022248mg, partial [Erythranthe guttata]                                   |
| c27518.graph_c0 | 0             | 0             | 0             | 3.31288887     | 3.11331898     | 2.26193675     | 4.126E-14 | Inf      | up        | hypothetical protein MIMGU_mgv1a013970mg [Erythranthe guttata]                                            |
| c27519.graph_c0 | 15.6308104    | 18.75908      | 15.4481865    | 9.74611889     | 10.6764002     | 11.3610763     | 2.535E-24 | -1.73837 | down      | PREDICTED: F-box protein At5g51370-like [Sesamum indicum]                                                 |
| c27524.graph_c0 | 0.43806578    | 1.15107416    | 0.84439781    | 4.89514919     | 4.13239014     | 4.15677582     | 0.0001493 | 1.34281  | up        | PREDICTED: zinc finger protein ZAT5-like [Sesamum indicum]                                                |
| c27527.graph_c0 | 10.8459486    | 13.2641886    | 12.7255192    | 3.8385677      | 3.49681197     | 3.7475013      | 2.379E-39 | -2.8246  | down      | hypothetical protein MIMGU_mgv1a009219mg [Erythranthe guttata]                                            |
| c27529.graph_c0 | 0.84356256    | 0.50664436    | 0.57813935    | 3.2698475      | 3.17379314     | 2.73487308     | 0.004199  | 1.1636   | up        | PREDICTED: alpha/beta hydrolase domain-containing protein 11 isoform X1 [Sesamum indicum]                 |
| c27531.graph_c0 | 1.7063004     | 1.39171104    | 0.81209762    | 171.505289     | 158.875895     | 160.897726     | 0         | 5.89108  | up        | PREDICTED: RING-H2 finger protein A1L79-like [Sesamum indicum]                                            |
| c27535.graph_c0 | 22.21318      | 20.8571944    | 25.5959711    | 24.8837412     | 19.9378118     | 22.1557811     | 7.37E-09  | -1.12849 | down      | -                                                                                                         |
| c27537.graph_c0 | 2.72745383    | 3.08020867    | 2.6061974     | 2.84637622     | 2.5241178      | 2.61294722     | 0.0002437 | -1.16538 | down      | BnaC03g60650D [Brassica napus]                                                                            |
| c27538.graph_c0 | 38.5841192    | 40.574808     | 31.1454477    | 16.0967212     | 17.9159162     | 19.0000151     | 2.807E-29 | -2.14431 | down      | -                                                                                                         |
| c27542.graph_c0 | 0.4914054     | 0.60763805    | 0.26001928    | 4.11773651     | 3.43339454     | 3.82290194     | 8.332E-10 | 1.98235  | up        | PREDICTED: pentatricopeptide repeat-containing protein At5g15010, mitochondrial [Sesamum indicum]         |
| c27545.graph_c0 | 0.16552945    | 0.2711376     | 0.25138678    | 5.12940385     | 5.96449452     | 4.39081325     | 1.015E-28 | 3.39676  | up        | PREDICTED: probably inactive leucine-rich repeat receptor-like protein kinase At3g28040 [Sesamum indicum] |
| c27546.graph_c0 | 0             | 0.06114516    | 0.07849535    | 1.3984581      | 1.62344128     | 1.59395991     | 5.273E-12 | 3.9378   | up        | PREDICTED: peptide-N4-(N-acetyl-beta-glucosaminyl)asparagine amidase A-like [Sesamum indicum]             |
| c27548.graph_c0 | 16.9430342    | 16.5147495    | 18.9145083    | 14.6358511     | 17.619735      | 15.9955908     | 3.781E-16 | -1.21058 | down      | PREDICTED: mitochondrial substrate carrier family protein B-like [Sesamum indicum]                        |
| c27555.graph_c0 | 4.9016927     | 5.15679596    | 4.47879934    | 27.8946482     | 29.8152737     | 27.3240483     | 4.285E-57 | 1.45874  | up        | PREDICTED: primary amine oxidase-like [Sesamum indicum]                                                   |



| #ID             | 0 h-1<br>FPKM | 0 h-2<br>FPKM | 0 h-3<br>FPKM | 28 h-1<br>FPKM | 28 h-2<br>FPKM | 28 h-3<br>FPKM | FDR       | log2FC   | regulated | nr_annotation                                                                             |
|-----------------|---------------|---------------|---------------|----------------|----------------|----------------|-----------|----------|-----------|-------------------------------------------------------------------------------------------|
| c27557.graph_c0 | 5.87585541    | 6.26120624    | 5.84570852    | 1.51535214     | 1.3682209      | 1.57374633     | 6.331E-15 | -3.10214 | down      | PREDICTED: uncharacterized protein At5g65660-like [Sesamum indicum]                       |
| c27557.graph_c1 | 8.11961278    | 7.83218904    | 8.34721911    | 3.43347652     | 2.80947231     | 2.88924158     | 2.306E-15 | -2.50308 | down      | PREDICTED: uncharacterized protein At5g05660 [Sesamum indicum]                            |
| c27561.graph_c0 | 59.9359416    | 60.3875769    | 56.9606564    | 27.2683368     | 26.5205801     | 27.4711953     | 2.04E-147 | -2.21517 | down      | PREDICTED: cytosolic Fe-S cluster assembly factor NBP35-like [Sesamum indicum]            |
| c27569.graph_c0 | 6.23966465    | 6.47512054    | 5.48034037    | 2.89155216     | 1.87827374     | 3.3949395      | 1.866E-42 | -2.24271 | down      | hypothetical protein MIMGU_mgv1a0029/5mg [Erythranthe outtata]                            |
| c27570.graph_c0 | 2.39134585    | 1.70981459    | 2.92664199    | 9.60047143     | 10.835407      | 10.1300512     | 0.0011292 | 1.02616  | up        | -                                                                                         |
| c27572.graph_c0 | 2.77776659    | 1.60092163    | 1.83885396    | 0.06117772     | 0.27618872     | 0.14976156     | 2.024E-13 | -4.76189 | down      | PREDICTED: protein IAL1-like [Sesamum indicum]                                            |
| c27575.graph_c0 | 11.1081151    | 10.6874231    | 15.7988147    | 3.6839394      | 3.04316661     | 4.73295256     | 4.997E-09 | -2.80768 | down      | -                                                                                         |
| c27576.graph_c0 | 8.84781085    | 8.11241256    | 8.50345433    | 44.8516511     | 48.8401597     | 48.9009957     | 3.253E-25 | 1.39526  | up        | PREDICTED: 60S ribosomal protein L14-2 [Sesamum indicum]                                  |
| c27577.graph_c0 | 0.62653174    | 0.49276788    | 0.69010122    | 10.9936832     | 13.6265889     | 12.9518603     | 5.16E-36  | 3.28352  | up        | PREDICTED: protein INVOLVED IN DE NOVO 2-like [Sesamum indicum]                           |
| c27582.graph_c0 | 1.73758231    | 2.48014467    | 2.06746487    | 16.4640153     | 16.2802149     | 15.1901472     | 9.614E-30 | 1.83908  | up        | PREDICTED: glycerol-3-phosphate acyltransferase 1 [Sesamum indicum]                       |
| c27584.graph_c0 | 0.45873328    | 0.09183853    | 0.35369426    | 3.53408987     | 3.07053853     | 3.37348841     | 1.637E-06 | 2.3747   | up        | PREDICTED: uncharacterized protein LOC105159891 [Sesamum indicum]                         |
| c27587.graph_c0 | 0.72846948    | 0.36459947    | 0.73551667    | 4.34903239     | 5.63405914     | 4.44368338     | 1.124E-07 | 1.88669  | up        | Tubulin beta-7 chain [Gossypium arboreum]                                                 |
| c27588.graph_c0 | 31.0915017    | 31.8990834    | 32.1457894    | 31.2413464     | 32.4073941     | 32.0862798     | 4.317E-25 | -1.08186 | down      | PREDICTED: E3 ubiquitin-protein ligase CIP8-like [Sesamum indicum]                        |
| c27593.graph_c0 | 0             | 0.04725455    | 0             | 0.51464973     | 0.89838221     | 0.67191996     | 1.328E-07 | 4.38101  | up        | PREDICTED: wall-associated receptor kinase 2-like [Sesamum indicum]                       |
| c27595.graph_c0 | 4.73583626    | 2.93167353    | 3.04286854    | 2.87586361     | 2.92377035     | 3.03036        | 0.0002976 | -1.36401 | down      | hypothetical protein MIMGU_mgv1a009850mg [Erythranthe outtata]                            |
| c27597.graph_c0 | 5.5536178     | 3.27010524    | 6.29701655    | 2.96789516     | 3.96600197     | 3.58423175     | 0.0021548 | -1.61761 | down      | PREDICTED: uncharacterized protein LOC105165182 [Sesamum indicum]                         |
| c27600.graph_c0 | 3.29282473    | 2.19741466    | 3.12318368    | 15.2709337     | 16.9265852     | 18.1799786     | 2.387E-10 | 1.45774  | up        | PREDICTED: 50S ribosomal protein S, chloroplastic [Sesamum indicum]                       |
| c27601.graph_c0 | 0.83325537    | 1.13739511    | 0.68139664    | 44.8698399     | 48.8147482     | 46.6764987     | 1.01E-103 | 4.63857  | up        | PREDICTED: protein SPIRAL1-like 1-like [Oryza brachyantha]                                |
| c27604.graph_c0 | 1.83039173    | 1.32327332    | 1.43741024    | 12.04677       | 13.5018446     | 11.9006115     | 4.74E-24  | 1.9395   | up        | PREDICTED: deoxyribodipyrimidine photo-lyase [Sesamum indicum]                            |
| c27609.graph_c0 | 41.1686019    | 39.923359     | 39.7462753    | 166.418619     | 173.706094     | 178.1484       | 1.383E-36 | 1.01065  | up        | PREDICTED: protein disulfide-isomerase like 2-1-like [Sesamum indicum]                    |
| c27612.graph_c0 | 0.07281783    | 0.07289074    | 0             | 1.85232519     | 1.62469094     | 1.51148222     | 5.257E-09 | 4.02659  | up        | PREDICTED: uncharacterized protein LOC105160557 [Sesamum indicum]                         |
| c27614.graph_c0 | 30.9455574    | 27.0083076    | 33.1645464    | 19.4040456     | 18.9800367     | 21.6631653     | 9.133E-19 | -1.69294 | down      | PREDICTED: uncharacterized protein LOC105163129 [Sesamum indicum]                         |
| c27616.graph_c0 | 0             | 0             | 0.14474571    | 1.55544364     | 2.62404746     | 1.33603085     | 1.585E-05 | 4.11923  | up        | PREDICTED: myb-related protein Zm38-like [Sesamum indicum]                                |
| c27622.graph_c0 | 23.4439774    | 24.3941047    | 21.7100697    | 22.5560008     | 20.8215681     | 21.6583883     | 8.956E-43 | -1.18614 | down      | PREDICTED: 1-phosphatidylinositol-3-phosphate 5-kinase FAB1A isoform X2 [Sesamum indicum] |
| c27630.graph_c0 | 0.72589485    | 0.7556866     | 0.52237003    | 0.10551524     | 0.17148666     | 0.10331949     | 1.175E-15 | -3.48569 | down      | -                                                                                         |

| #ID             | 0 h-1<br>FPKM | 0 h-2<br>FPKM | 0 h-3<br>FPKM | 28 h-1<br>FPKM | 28 h-2<br>FPKM | 28 h-3<br>FPKM | FDR       | log2FC   | regulated | nr_annotation                                                                    |
|-----------------|---------------|---------------|---------------|----------------|----------------|----------------|-----------|----------|-----------|----------------------------------------------------------------------------------|
| c27631.graph_c0 | 3.67344539    | 4.33245278    | 3.78576578    | 26.5662191     | 30.6458286     | 24.4172038     | 1.532E-22 | 1.70001  | up        | PREDICTED: uncharacterized protein LOC100264843 [Vitis vinifera]                 |
| c27632.graph_c0 | 54.1287191    | 50.2338521    | 56.3110863    | 29.4128376     | 30.5934812     | 29.3089519     | 7.217E-58 | -1.93861 | down      | PREDICTED: monothiol glutaredoxin-S16, chloroplastic [Sesamum indicum]           |
| c27637.graph_c0 | 1.66504701    | 1.37040954    | 1.14114738    | 9.33157467     | 9.00828308     | 8.07530793     | 5.82E-12  | 1.57427  | up        | -                                                                                |
| c27639.graph_c0 | 4.73420112    | 5.96924388    | 5.0891954     | 4.23481857     | 4.98866069     | 3.80653445     | 1.472E-11 | -1.36922 | down      | PREDICTED: uncharacterized protein LOC105162275 [Sesamum indicum]                |
| c27641.graph_c0 | 1.37360702    | 1.85093796    | 1.15412961    | 1.19031614     | 0.90139809     | 0.90862449     | 6.105E-06 | -1.63333 | down      | PREDICTED: heat shock factor protein HSF3U-like [Sesamum indicum]                |
| c27644.graph_c0 | 2.28789938    | 2.02845432    | 2.52003539    | 11.3547677     | 11.4533958     | 8.02484235     | 4.33E-05  | 1.07933  | up        | PREDICTED: uncharacterized protein LOC105159746 [Sesamum indicum]                |
| c27652.graph_c0 | 3.15962805    | 4.99388201    | 3.84654992    | 0.12086313     | 0.32738422     | 0.49311663     | 2.648E-18 | -4.76012 | down      | -                                                                                |
| c27656.graph_c0 | 0.17104361    | 0.26905196    | 0.21979781    | 1.01226715     | 1.28278222     | 1.02887935     | 0.0032382 | 1.23965  | up        | PREDICTED: LOW QUALITY PROTEIN: uncharacterized protein ycf45 [Sesamum indicum]  |
| c27659.graph_c0 | 3.23727108    | 2.27404401    | 1.60562234    | 11.2688172     | 10.9946234     | 12.091939      | 7.551E-07 | 1.18912  | up        | PREDICTED: methyltransferase-like protein 15 [Sesamum indicum]                   |
| c27662.graph_c0 | 0.19317134    | 0.12890985    | 0.12411641    | 1.05296862     | 1.18313308     | 1.08833747     | 0.0001356 | 1.81152  | up        | PREDICTED: MATE efflux family protein 5-like [Sesamum indicum]                   |
| c27667.graph_c0 | 75.2251956    | 73.1638146    | 71.5073582    | 52.1589116     | 56.2720173     | 58.3634726     | 3.892E-63 | -1.48841 | down      | PREDICTED: uncharacterized protein LOC105180257 [Sesamum indicum]                |
| c27670.graph_c1 | 53.4949168    | 53.789802     | 60.9363003    | 45.7656739     | 49.3270854     | 51.8561246     | 2.979E-17 | -1.287   | down      | hypothetical protein MIMGU_mgv1a001800mg [Erythranthe outtata]                   |
| c27672.graph_c0 | 1.19885073    | 1.16368601    | 1.21378294    | 10.5350243     | 12.5398126     | 9.82456435     | 1.064E-22 | 2.10979  | up        | PREDICTED: uncharacterized protein LOC105164990 isoform X1 [Sesamum indicum]     |
| c27675.graph_c0 | 41.2079142    | 43.5771737    | 47.2568315    | 26.09372       | 27.7094456     | 28.2316435     | 4.776E-32 | -1.77874 | down      | PREDICTED: DNL-type zinc finger protein-like [Sesamum indicum]                   |
| c27677.graph_c0 | 0             | 0             | 0             | 1.41975113     | 1.30655412     | 1.40357376     | 2.017E-14 | Inf      | up        | PREDICTED: formin-like protein 6 [Sesamum indicum]                               |
| c27682.graph_c0 | 1.21841638    | 1.55226456    | 1.20986936    | 0.04025173     | 0.18171768     | 0.1642254      | 3.047E-20 | -4.4543  | down      | PREDICTED: ammonium transporter 3 member 1-like [Solanum tuberosum]              |
| c27685.graph_c0 | 20.9534597    | 22.9118396    | 18.4913668    | 18.4703367     | 19.1067413     | 16.6187332     | 4.36E-21  | -1.29166 | down      | PREDICTED: probable WRKY transcription factor 65 [Sesamum indicum]               |
| c27686.graph_c0 | 1.20948591    | 1.41247987    | 1.46789076    | 0.04883597     | 0.30866009     | 0.0796995      | 2.229E-18 | -4.32324 | down      | -                                                                                |
| c27688.graph_c0 | 0.10753606    | 0.03588125    | 0.18425079    | 9.40484254     | 8.25646412     | 6.93023146     | 2.614E-36 | 5.12695  | up        | PREDICTED: allene oxide cyclase 4, chloroplastic-like [Pyrus x bretschneideri]   |
| c27692.graph_c0 | 1.12071689    | 0.85105037    | 0.74491323    | 9.52158161     | 9.43398085     | 9.67180784     | 8.585E-21 | 2.31172  | up        | PREDICTED: uncharacterized protein LOC105172843 [Sesamum indicum]                |
| c27693.graph_c0 | 3.25245818    | 3.47769559    | 3.46711636    | 15.0696576     | 16.3229347     | 16.4175427     | 3.134E-13 | 1.13808  | up        | PREDICTED: uncharacterized protein LOC105170243 [Sesamum indicum]                |
| c27694.graph_c0 | 1.73179554    | 0.95344132    | 1.66906938    | 0              | 0              | 0              | 7.043E-21 | -Inf     | down      | hypothetical protein V501_06377 [Pseudogymnoascus pannorum VKM F-4519 (FW-2642)] |
| c27696.graph_c0 | 10.579298     | 10.1759544    | 9.96362789    | 4.25773737     | 5.15593519     | 5.57928321     | 6.155E-53 | -2.12403 | down      | hypothetical protein MIMGU_mgv1a0086/9mg [Erythranthe outtata]                   |

| #ID             | 0 h-1<br>FPKM | 0 h-2<br>FPKM | 0 h-3<br>FPKM | 28 h-1<br>FPKM | 28 h-2<br>FPKM | 28 h-3<br>FPKM | FDR       | log2FC   | regulated | nr_annotation                                                                                          |
|-----------------|---------------|---------------|---------------|----------------|----------------|----------------|-----------|----------|-----------|--------------------------------------------------------------------------------------------------------|
| c27697.graph_c0 | 3.99936244    | 4.25754924    | 4.97618545    | 20.3931333     | 22.1623585     | 22.0996605     | 8.76E-12  | 1.19538  | up        | PREDICTED: glycine-rich RNA-binding protein 3, mitochondrial-like [Solanum tuberosum]                  |
| c27698.graph_c0 | 0.03000741    | 0.09011236    | 0             | 3.29319066     | 2.04793384     | 2.66942055     | 8.878E-14 | 4.98377  | up        | hypothetical protein MIMGU_mgv1a004055mg [Erythranthe diffusa]                                         |
| c27703.graph_c0 | 0.19891022    | 0.1991094     | 0.04260125    | 1.48180973     | 2.01234164     | 1.4450753      | 1.419E-08 | 2.40928  | up        | PREDICTED: probable LRR receptor-like serine/threonine-protein kinase At1g74360 [Sesamum indicum]      |
| c27705.graph_c0 | 0             | 0             | 0.14040454    | 3.25581681     | 3.36989693     | 5.37823791     | 4.041E-08 | 5.29006  | up        | hypothetical protein MIMGU_mgv1a024655mg [Erythranthe diffusa]                                         |
| c27710.graph_c0 | 0.28420376    | 0.22759068    | 0.29217047    | 23.8367533     | 23.9468818     | 23.5632004     | 4.688E-79 | 5.37993  | up        | PREDICTED: glucan endo-1,3-beta-glucosidase 4-like [Nicotiana glauca]                                  |
| c27714.graph_c0 | 1.04243035    | 0.72049408    | 0.82925407    | 9.10962729     | 9.38154506     | 9.71491441     | 4.521E-32 | 2.35564  | up        | PREDICTED: pentatricopeptide repeat-containing protein At3g62470, mitochondrial-like [Sesamum indicum] |
| c27725.graph_c0 | 5.76024151    | 5.59388984    | 7.18117905    | 53.0499593     | 51.6227473     | 55.3213686     | 1.413E-42 | 2.01626  | up        | PREDICTED: 40S ribosomal protein S13-like [Sesamum indicum]                                            |
| c27727.graph_c0 | 27.3597056    | 31.0483826    | 25.2925727    | 18.1740663     | 16.4094779     | 16.9453772     | 5.763E-34 | -1.78903 | down      | PREDICTED: autophagy-related protein 9 [Sesamum indicum]                                               |
| c27733.graph_c0 | 0.79409193    | 0.67259677    | 0.74570584    | 0.19977973     | 0.16033988     | 0.21735817     | 6.677E-13 | -3.02681 | down      | -                                                                                                      |
| c27737.graph_c0 | 5.23289862    | 6.26859207    | 4.96068337    | 6.48421341     | 5.51686925     | 5.39281645     | 7.33E-05  | -1.01025 | down      | PREDICTED: uncharacterized protein LOC105168421 isoform X1 [Sesamum indicum]                           |
| c27740.graph_c0 | 3.33067998    | 3.6515404     | 3.26099477    | 0.23054467     | 0.31224033     | 0.18812257     | 2.498E-21 | -4.90078 | down      | PREDICTED: uncharacterized protein LOC103423918 [Morus domestica]                                      |
| c27741.graph_c0 | 0.78114804    | 0.54735117    | 0.90342554    | 11.0140375     | 11.3799526     | 10.42349       | 1.782E-16 | 2.78406  | up        | PREDICTED: transcription factor TCP4-like [Sesamum indicum]                                            |
| c27744.graph_c0 | 1.59169862    | 1.49672928    | 1.30161547    | 0.3155011      | 0.28486792     | 0.28605147     | 1.063E-16 | -3.39639 | down      | -                                                                                                      |
| c27745.graph_c1 | 6.9930733     | 7.36635884    | 6.47855018    | 40.7193021     | 42.2085315     | 37.229244      | 2.939E-36 | 1.43769  | up        | PREDICTED: equilibrative nucleotide transporter 1 [Sesamum indicum]                                    |
| c27749.graph_c0 | 1.38113785    | 1.6671575     | 1.40941336    | 8.85708556     | 9.0634002      | 8.26322385     | 3.8E-10   | 1.46365  | up        | PREDICTED: tRNA (adenine(58)-N(1))-methyltransferase catalytic subunit trmt61a [Sesamum indicum]       |
| c27751.graph_c0 | 26.0567852    | 30.0224784    | 17.9627712    | 20.8119865     | 18.3459816     | 20.2823108     | 2.357E-05 | -1.4023  | down      | PREDICTED: probable glutathione S-transferase [Sesamum indicum]                                        |
| c27752.graph_c0 | 0.72781003    | 1.11304542    | 0.88330555    | 4.59908406     | 4.1525417      | 4.46021467     | 9.164E-08 | 1.18654  | up        | PREDICTED: CSC1-like protein At1g32090 [Sesamum indicum]                                               |
| c27754.graph_c0 | 104.926041    | 103.51742     | 102.236858    | 84.1452544     | 95.2140757     | 90.4430578     | 1.42E-54  | -1.29384 | down      | PREDICTED: topless-related protein 4 [Sesamum indicum]                                                 |
| c27755.graph_c0 | 0.13297161    | 0.15211973    | 0.29292649    | 1.10449144     | 0.99725221     | 1.16036709     | 0.0002504 | 1.39586  | up        | PREDICTED: glutamate receptor 3.2-like [Sesamum indicum]                                               |
| c27758.graph_c0 | 0             | 0             | 0             | 1.78981028     | 1.93923705     | 1.31442352     | 3.653E-14 | Inf      | up        | PREDICTED: myosin heavy chain kinase B-like [Sesamum indicum]                                          |
| c27760.graph_c0 | 11.6993865    | 11.7935742    | 9.31695343    | 8.38328546     | 8.38031941     | 9.62583155     | 8.519E-14 | -1.4011  | down      | PREDICTED: uncharacterized protein LOC105179312 [Sesamum indicum]                                      |
| c27765.graph_c0 | 40.4608418    | 41.8292706    | 40.9131412    | 16.2701041     | 17.410819      | 20.553636      | 2.34E-49  | -2.27343 | down      | PREDICTED: polyubiquitin 4-like [Cicer arietinum]                                                      |
| c27768.graph_c0 | 140.34812     | 133.942591    | 133.163783    | 80.7990294     | 77.9881004     | 82.5633512     | 7.172E-96 | -1.84527 | down      | PREDICTED: uncharacterized protein LOC105170296 [Sesamum indicum]                                      |
| c27771.graph_c0 | 1.18331957    | 1.42957438    | 0.99626336    | 0.56346783     | 0.54892377     | 0.59288085     | 1.445E-13 | -2.16919 | down      | PREDICTED: uncharacterized protein LOC105176570 isoform X1 [Sesamum indicum]                           |

| #ID             | 0 h-1<br>FPKM | 0 h-2<br>FPKM | 0 h-3<br>FPKM | 28 h-1<br>FPKM | 28 h-2<br>FPKM | 28 h-3<br>FPKM | FDR       | log2FC   | regulated | nr_annotation                                                                            |
|-----------------|---------------|---------------|---------------|----------------|----------------|----------------|-----------|----------|-----------|------------------------------------------------------------------------------------------|
| c27772.graph_c0 | 1.51363599    | 1.59705176    | 1.73480302    | 12.4579109     | 12.1879231     | 12.7130073     | 1.793E-19 | 1.85468  | up        | PREDICTED: uncharacterized protein At2g39795, mitochondrial isoform X1 [Sesamum indicum] |
| c27778.graph_c0 | 0.29460773    | 0.15612498    | 0.26723477    | 1.17135797     | 0.93253082     | 0.97637378     | 0.0076572 | 1.01019  | up        | PREDICTED: phosphoenolpyruvate carboxylase 4 [Sesamum indicum]                           |
| c27779.graph_c0 | 1.39791127    | 2.13579058    | 1.41818789    | 18.5552562     | 13.4705193     | 15.795445      | 3.352E-13 | 2.18243  | up        | PREDICTED: transcription factor BEE 1-like [Sesamum indicum]                             |
| c27780.graph_c0 | 2.24519132    | 2.14972478    | 2.73462967    | 12.9266314     | 12.2865019     | 11.9142903     | 9.58E-23  | 1.28696  | up        | PREDICTED: NAD kinase 2, chloroplastic [Sesamum indicum]                                 |
| c27785.graph_c0 | 5.04004086    | 4.71426228    | 6.05195356    | 48.4005993     | 50.3160255     | 46.6975838     | 9.741E-43 | 2.108    | up        | hypothetical protein MIMGU_mgv1a013628mg [Erythranthe guttata]                           |
| c27785.graph_c1 | 12.4363384    | 14.1367632    | 15.1685845    | 134.04791      | 124.767418     | 137.008768     | 1.739E-46 | 2.15282  | up        | PREDICTED: polyadenylate-binding protein 2 isoform X1 [Sesamum indicum]                  |
| c27788.graph_c0 | 2.1744026     | 2.53934326    | 2.9494264     | 0              | 0.23781697     | 0.42984907     | 2.349E-19 | -4.6092  | down      | -                                                                                        |
| c27790.graph_c0 | 3.45263063    | 4.63262849    | 3.87037126    | 39.0284329     | 45.4588122     | 41.5621421     | 3.081E-46 | 2.30693  | up        | PREDICTED: nucleoside diphosphate kinase 2, chloroplastic [Sesamum indicum]              |
| c27793.graph_c0 | 1.47155985    | 1.09113585    | 0.98052509    | 0.67340225     | 0.32189246     | 0.80807461     | 1.882E-07 | -2.05728 | down      | -                                                                                        |
| c27795.graph_c1 | 0.60917852    | 0.99090635    | 0.39140926    | 3.76335325     | 2.84828592     | 3.4773036      | 0.0048307 | 1.2569   | up        | PREDICTED: exonuclease DPD1, chloroplastic/mitochondrial [Sesamum indicum]               |
| c27796.graph_c0 | 2.21699923    | 3.00668411    | 2.29752564    | 19.5435372     | 15.674888      | 15.8625403     | 3.225E-13 | 1.67341  | up        | unnamed protein product [Coffea canephora]                                               |
| c27798.graph_c0 | 23.9436946    | 22.5806526    | 21.6163628    | 11.1985988     | 10.1476563     | 10.1733821     | 1.6E-117  | -2.20176 | down      | PREDICTED: uncharacterized protein LOC105164093 [Sesamum indicum]                        |
| c27801.graph_c0 | 0.77136419    | 0.66684524    | 0.49561676    | 6.80392517     | 7.04064341     | 6.36290599     | 2.286E-16 | 2.29964  | up        | PREDICTED: chorismate mutase 1, chloroplastic-like [Sesamum indicum]                     |
| c27803.graph_c0 | 2.39313581    | 1.75998282    | 2.44766727    | 1.49084341     | 1.98708793     | 2.51992611     | 0.0001213 | -1.22827 | down      | hypothetical protein MIMGU_mgv1a020505mg [Erythranthe guttata]                           |
| c27807.graph_c0 | 0.53456058    | 1.60528759    | 0.68693151    | 39.4990808     | 37.5348632     | 39.0998135     | 1.29E-35  | 4.27124  | up        | hypothetical protein MIMGU_mgv1a0223741mg, partial [Erythranthe guttata]                 |
| c27818.graph_c0 | 0             | 0             | 0             | 17.3087547     | 13.3595755     | 14.3971664     | 1.087E-60 | Inf      | up        | hypothetical protein MIMGU_mgv1a023617mg [Erythranthe guttata]                           |
| c27824.graph_c0 | 3.13417841    | 3.64009194    | 2.94320475    | 32.1680761     | 32.3276184     | 30.5621408     | 1.281E-96 | 2.20059  | up        | PREDICTED: LOW QUALITY PROTEIN: uncharacterized protein LOC105170443 [Sesamum indicum]   |
| c27825.graph_c0 | 1.17831881    | 0.8256491     | 1.58989564    | 59.7335735     | 61.1249918     | 58.9796979     | 1.79E-164 | 4.54887  | up        | PREDICTED: 2-Cys peroxiredoxin BAS1, chloroplastic-like [Sesamum indicum]                |
| c27827.graph_c0 | 0             | 0             | 0             | 2.33657903     | 2.67230159     | 2.54217254     | 7.501E-16 | Inf      | up        | PREDICTED: cyclin-D5-3-like [Sesamum indicum]                                            |
| c27833.graph_c0 | 1.49385644    | 1.07665366    | 1.07501222    | 6.81836086     | 6.03870349     | 5.35110028     | 0.000146  | 1.23271  | up        | PREDICTED: uncharacterized protein LOC105175923 [Sesamum indicum]                        |
| c27839.graph_c0 | 14.6785035    | 14.7674099    | 13.4323566    | 12.2307735     | 10.8486471     | 13.7612605     | 9.53E-17  | -1.30734 | down      | -                                                                                        |
| c27841.graph_c0 | 1.95382384    | 2.1335785     | 2.47269945    | 10.0262576     | 9.84925897     | 10.5163632     | 8.318E-11 | 1.1187   | up        | PREDICTED: uncharacterized protein LOC105159050 [Sesamum indicum]                        |
| c27843.graph_c0 | 131.848771    | 125.004989    | 108.372557    | 35.4272527     | 46.3671838     | 41.99225       | 3.745E-83 | -2.64918 | down      | PREDICTED: NAC domain-containing protein 2 [Glycine max]                                 |
| c27846.graph_c0 | 0.047995      | 0.14412917    | 0.18502642    | 4.11613361     | 4.12592574     | 5.63583745     | 4.349E-16 | 4.10024  | up        | PREDICTED: lignin-forming anionic peroxidase-like [Sesamum indicum]                      |

| #ID             | 0 h-1<br>FPKM | 0 h-2<br>FPKM | 0 h-3<br>FPKM | 28 h-1<br>FPKM | 28 h-2<br>FPKM | 28 h-3<br>FPKM | FDR       | log2FC   | regulated | nr_annotation                                                                                          |
|-----------------|---------------|---------------|---------------|----------------|----------------|----------------|-----------|----------|-----------|--------------------------------------------------------------------------------------------------------|
| c27847.graph_c0 | 1.46725879    | 1.75431403    | 1.20461582    | 8.08683051     | 7.27490376     | 6.55044489     | 1.333E-06 | 1.21936  | up        | PREDICTED: cytochrome P450 CYP736A12-like [Sesamum indicum]                                            |
| c27850.graph_c0 | 0.04795551    | 0.33602472    | 0.18487419    | 4.49613884     | 4.75192531     | 4.72110766     | 1.207E-15 | 3.52237  | up        | PREDICTED: protein COBRA-like [Sesamum indicum]                                                        |
| c27854.graph_c0 | 0.1551319     | 0.15528724    | 0.19935064    | 4.45358444     | 4.6319797      | 4.27810423     | 1.04E-11  | 3.61798  | up        | PREDICTED: hexose carrier protein HEX6-like [Sesamum indicum]                                          |
| c27858.graph_c0 | 0.29546901    | 0.39435318    | 0.50625251    | 10.1407445     | 7.10947455     | 8.39158488     | 1.512E-19 | 3.32543  | up        | hypothetical protein MIMGU_mgv1a026536mg, partial [Erythranthe guttata]                                |
| c27862.graph_c0 | 2.91723347    | 2.27123139    | 3.60991753    | 0.15705396     | 0.28361        | 0.2563095      | 2.397E-16 | -4.75217 | down      | PREDICTED: ethylene-responsive transcription factor ERF109-like [Sesamum indicum]                      |
| c27868.graph_c0 | 1.43253145    | 1.28141635    | 1.33168569    | 7.177328       | 8.48059444     | 6.65198735     | 2E-10     | 1.37245  | up        | PREDICTED: F-box/kelch-repeat protein At3g27150-like [Sesamum indicum]                                 |
| c27870.graph_c0 | 8.45255533    | 10.0579666    | 9.53110955    | 77.279063      | 75.3960112     | 91.3103508     | 6.984E-28 | 2.03047  | up        | PREDICTED: asparagine synthetase [glutamine-hydrolyzing] [Solanum lycopersicum]                        |
| c27876.graph_c0 | 0.27004538    | 0.16218948    | 0.1735095     | 1.00096388     | 1.4531309      | 1.29723621     | 0.0003958 | 1.54485  | up        | hypothetical protein MIMGU_mgv1a018515mg [Erythranthe guttata]                                         |
| c27877.graph_c0 | 0.7519986     | 0.37637581    | 0.48317399    | 2.5765846      | 3.77161108     | 3.24927489     | 0.000229  | 1.48808  | up        | PREDICTED: RING-H2 finger protein ATL3 [Sesamum indicum]                                               |
| c27879.graph_c0 | 3.57069196    | 3.06365783    | 3.47413527    | 35.6278166     | 35.6498809     | 33.3072634     | 6.806E-54 | 2.2801   | up        | PREDICTED: hsp70 nucleotide exchange factor HES1 [Sesamum indicum]                                     |
| c27879.graph_c1 | 2.20511295    | 2.0601663     | 2.83365745    | 27.8863429     | 25.7575749     | 23.5396842     | 3.041E-16 | 2.3478   | up        | -                                                                                                      |
| c27881.graph_c0 | 29.1757675    | 31.6799812    | 31.2963018    | 20.3062721     | 24.0946635     | 29.6935824     | 7.713E-23 | -1.40456 | down      | PREDICTED: serine carboxypeptidase-like 50 [Sesamum indicum]                                           |
| c27884.graph_c0 | 29.0378283    | 28.6356455    | 30.2282765    | 4.88472714     | 4.69317181     | 5.57003618     | 5.7E-131  | -3.62713 | down      | hypothetical protein CICLE_v10017323mg [Citrus clementina]                                             |
| c27885.graph_c0 | 0.58582963    | 0.39094416    | 0.15056285    | 6.7556712      | 8.38073203     | 8.06040017     | 3.816E-25 | 3.28655  | up        | PREDICTED: cytochrome P450 81E8-like isoform X1 [Sesamum indicum]                                      |
| c27888.graph_c1 | 7.2733907     | 7.48535148    | 8.07035312    | 39.0843445     | 43.1869855     | 39.5321557     | 4.395E-41 | 1.32346  | up        | PREDICTED: aspartokinase 2, chloroplastic [Sesamum indicum]                                            |
| c27896.graph_c0 | 8.03810346    | 9.25392581    | 7.59955572    | 8.34931068     | 7.49403736     | 8.12315575     | 6.153E-18 | -1.14383 | down      | PREDICTED: U-box domain-containing protein 44 [Sesamum indicum]                                        |
| c27905.graph_c0 | 13.3845651    | 12.7640854    | 13.0939622    | 7.82409992     | 6.74331825     | 7.42570779     | 5.202E-64 | -1.92553 | down      | PREDICTED: transcription factor RF2b-like [Sesamum indicum]                                            |
| c27907.graph_c0 | 0.49605815    | 0.16551829    | 0.84993914    | 6.60975703     | 6.61904442     | 6.27608176     | 1.618E-07 | 2.58767  | up        | PREDICTED: protein RER1A-like [Sesamum indicum]                                                        |
| c27908.graph_c0 | 8.67355296    | 8.84814085    | 7.09927321    | 39.9112418     | 42.2354803     | 36.5316709     | 1.541E-20 | 1.18058  | up        | PREDICTED: vacuolar protein sorting-associated protein 29 [Sesamum indicum]                            |
| c27913.graph_c0 | 1.4030446     | 1.40444954    | 1.54540102    | 14.7131711     | 20.4530443     | 16.5228714     | 2.38E-15  | 2.47735  | up        | hypothetical protein OsI_11409 [Oryza sativa Indica Group]                                             |
| c27915.graph_c0 | 6.10573662    | 7.95961938    | 7.4811778     | 42.518536      | 41.558379      | 44.1263683     | 4.011E-14 | 1.48081  | up        | PREDICTED: mitochondrial import inner membrane translocase subunit TIM8 [Sesamum indicum]              |
| c27923.graph_c0 | 0.97241116    | 1.36994909    | 1.57355379    | 52.3251447     | 52.0424356     | 50.3434575     | 3.38E-203 | 4.20811  | up        | PREDICTED: protein disulfide isomerase-like 2-3 [Sesamum indicum]                                      |
| c27931.graph_c0 | 0.40804837    | 0.24507418    | 0.89140913    | 3.61811989     | 3.56137265     | 4.01714052     | 1.854E-07 | 1.75439  | up        | PREDICTED: pentatricopeptide repeat-containing protein At2g29760, chloroplastic-like [Sesamum indicum] |
| c27934.graph_c0 | 1.70236905    | 1.57784603    | 1.45840775    | 0.13747467     | 0.37238021     | 0.26174915     | 5.88E-17  | -3.70795 | down      | PREDICTED: ADP,ATP carrier protein 1, mitochondrial-like [Malus domestica]                             |
| c27935.graph_c0 | 28.4094746    | 31.453245     | 28.1395948    | 11.9823035     | 12.4523843     | 11.7350936     | 1.52E-118 | -2.3731  | down      | PREDICTED: DNA ligase 1-like [Sesamum indicum]                                                         |

| #ID             | 0 h-1<br>FPKM | 0 h-2<br>FPKM | 0 h-3<br>FPKM | 28 h-1<br>FPKM | 28 h-2<br>FPKM | 28 h-3<br>FPKM | FDR       | log2FC   | regulated | nr_annotation                                                                                                   |
|-----------------|---------------|---------------|---------------|----------------|----------------|----------------|-----------|----------|-----------|-----------------------------------------------------------------------------------------------------------------|
| c27941.graph_c0 | 9.59838261    | 9.97753216    | 9.07282767    | 6.00342692     | 5.42053163     | 5.28188959     | 2.12E-31  | -1.86809 | down      | hypothetical protein JCGZ_04255 [Jatropha curcas]                                                               |
| c27942.graph_c0 | 0.23949333    | 0.29966643    | 0             | 6.26624542     | 6.40435161     | 5.75235573     | 1.097E-17 | 4.02258  | up        | PREDICTED: 1-aminocyclopropane-1-carboxylate oxidase [Sesamum indicum]                                          |
| c27943.graph_c0 | 8.94174521    | 7.78022299    | 10.4298354    | 9.64823165     | 8.44062633     | 10.7691184     | 5.549E-05 | -1.00423 | down      | PREDICTED: LOW QUALITY PROTEIN: auxilin-related protein 2-like [Sesamum indicum]                                |
| c27946.graph_c0 | 1.59187668    | 1.53852343    | 2.11616333    | 1.91497952     | 1.40485065     | 2.14858552     | 0.0046599 | -1.03336 | down      | PREDICTED: putative germin-like protein 2-1 [Sesamum indicum]                                                   |
| c27947.graph_c0 | 1.77093816    | 1.64300089    | 1.22112108    | 0              | 0              | 0              | 2.277E-38 | -Inf     | down      | -                                                                                                               |
| c27949.graph_c0 | 5.61574579    | 6.50895371    | 6.4025697     | 2.82328748     | 3.07562164     | 2.55419034     | 2.276E-29 | -2.22468 | down      | PREDICTED: uncharacterized protein LOC105156723 [Sesamum indicum]                                               |
| c27952.graph_c0 | 0             | 0.06881418    | 0             | 1.51556606     | 2.09021488     | 1.79387932     | 7.07E-18  | 5.21204  | up        | PREDICTED: uncharacterized protein LOC105176065 [Sesamum indicum]                                               |
| c27954.graph_c0 | 2.38106559    | 3.85018825    | 2.11829785    | 1.79710416     | 1.2019382      | 1.46642232     | 0.0001687 | -1.99036 | down      | PREDICTED: probable polyamine transporter At3g13620 [Sesamum indicum]                                           |
| c27954.graph_c1 | 3.6205255     | 2.83342707    | 4.22956237    | 2.00941521     | 1.64152177     | 1.71774576     | 6.318E-09 | -2.08634 | down      | PREDICTED: probable polyamine transporter At3g13620 [Sesamum indicum]                                           |
| c27955.graph_c0 | 0.0774356     | 0.07751314    | 0             | 6.8098494      | 5.56427917     | 5.8782482      | 1.667E-32 | 5.80976  | up        | hypothetical protein MIMGU_mgv1a005882mg [Erythranthe ontifata]                                                 |
| c27956.graph_c0 | 0.80611286    | 1.07589342    | 1.43051054    | 8.78817275     | 8.28755806     | 8.30934342     | 8.919E-15 | 1.84052  | up        | PREDICTED: surfeit locus protein 1 [Sesamum indicum]                                                            |
| c27958.graph_c0 | 110.868602    | 106.039489    | 112.652421    | 97.0656654     | 101.67515      | 98.2806928     | 1.702E-52 | -1.24097 | down      | PREDICTED: peptide methionine sulfoxide reductase B5-like [Sesamum indicum]                                     |
| c27959.graph_c0 | 0.20719884    | 0.24197403    | 0.1775058     | 2.33415925     | 3.01399016     | 2.17089697     | 6.181E-09 | 2.49539  | up        | PREDICTED: uncharacterized protein LOC105161116 [Sesamum indicum]                                               |
| c27961.graph_c0 | 1.65015259    | 1.82184372    | 1.30972764    | 8.37761269     | 7.37310323     | 8.04496741     | 4.782E-11 | 1.22795  | up        | hypothetical protein MIMGU_mgv1a003065mg [Erythranthe ontifata]                                                 |
| c27962.graph_c0 | 4.91038074    | 4.05827147    | 4.62735802    | 34.6451659     | 37.841659      | 36.4391023     | 7.511E-75 | 1.91177  | up        | PREDICTED: ent-kaurene oxidase, chloroplastic-like [Sesamum indicum]                                            |
| c27963.graph_c0 | 1.29986727    | 0.7319075     | 1.14838687    | 5.07795622     | 7.51713359     | 5.54082143     | 0.000105  | 1.42049  | up        | -                                                                                                               |
| c27967.graph_c0 | 1.50655594    | 1.37692848    | 0.9048621     | 9.47375127     | 8.7795776      | 9.15812181     | 3.06E-30  | 1.77076  | up        | PREDICTED: LOW QUALITY PROTEIN: alpha,alpha-trehalose-phosphate synthase [UDP-forming] 1-like [Sesamum indicum] |
| c27970.graph_c0 | 2.57657718    | 2.26334206    | 2.36500263    | 15.095783      | 16.1490529     | 16.933401      | 1.679E-16 | 1.6519   | up        | Os05g0129800 [Oryza sativa Japonica Group]                                                                      |
| c27976.graph_c0 | 0             | 0             | 0             | 4.89014477     | 3.67257438     | 3.9903182      | 3.192E-19 | Inf      | up        | PREDICTED: homeobox-leucine zipper protein ATHB-40-like [Sesamum indicum]                                       |
| c27983.graph_c0 | 8.96596812    | 8.00468172    | 4.67092865    | 4.05074381     | 2.86234581     | 3.59279768     | 6.047E-06 | -2.12506 | down      | -                                                                                                               |
| c27987.graph_c0 | 0.75989639    | 0.82404542    | 1.22062118    | 9.06673317     | 8.7681853      | 9.23858648     | 1.062E-12 | 2.1743   | up        | PREDICTED: uncharacterized protein LOC105171687 [Sesamum indicum]                                               |
| c27988.graph_c0 | 6.72300873    | 9.51680518    | 6.02135288    | 134.4951       | 132.176351     | 140.073295     | 5.82E-180 | 3.10361  | up        | -                                                                                                               |
| c27993.graph_c0 | 10.5415026    | 10.5018104    | 10.9660104    | 3.64833492     | 3.3929275      | 2.7686207      | 1.392E-58 | -2.79831 | down      | PREDICTED: protein ECERIFERUM 1 [Sesamum indicum]                                                               |

| #ID             | 0 h-1<br>FPKM | 0 h-2<br>FPKM | 0 h-3<br>FPKM | 28 h-1<br>FPKM | 28 h-2<br>FPKM | 28 h-3<br>FPKM | FDR       | log2FC   | regulated | nr_annotation                                                                            |
|-----------------|---------------|---------------|---------------|----------------|----------------|----------------|-----------|----------|-----------|------------------------------------------------------------------------------------------|
| c27997.graph_c0 | 2.78044175    | 2.27718486    | 2.31431512    | 12.3085641     | 10.5329245     | 12.0861542     | 1.696E-11 | 1.15605  | up        | PREDICTED: probable lysine--tRNA ligase, cytoplasmic [Sesamum indicum]                   |
| c27998.graph_c0 | 1.24868964    | 1.11105779    | 0.93602578    | 1.08400663     | 0.59180617     | 1.25481335     | 0.0002771 | -1.25401 | down      | PREDICTED: pectinesterase 2.1-like [Sesamum indicum]                                     |
| c28000.graph_c0 | 435.520406    | 440.309382    | 438.873921    | 223.66438      | 176.704469     | 184.690473     | 1.27E-165 | -2.25887 | down      | PREDICTED: uncharacterized protein LOC105170296 [Sesamum indicum]                        |
| c28000.graph_c1 | 26.4632623    | 32.5866111    | 19.4321942    | 12.9748766     | 12.4042205     | 13.9504478     | 6.86E-08  | -2.0825  | down      | PREDICTED: probable membrane-associated kinase regulator 1 [Sesamum indicum]             |
| c28009.graph_c0 | 2.28776084    | 1.55723514    | 2.23429607    | 20.1523045     | 19.696932      | 20.4601706     | 3.136E-18 | 2.2193   | up        | hypothetical protein MIMGU_mgv1a006502mg [Erythranthe guttata]                           |
| c28010.graph_c0 | 26.4577206    | 25.4793929    | 27.9794833    | 9.9012753      | 11.3866391     | 11.5237184     | 2.558E-84 | -2.37545 | down      | PREDICTED: uncharacterized protein LOC105174992 [Sesamum indicum]                        |
| c28013.graph_c0 | 171.941286    | 160.79534     | 163.834681    | 713.170108     | 734.818607     | 716.630812     | 2.538E-39 | 1.03387  | up        | PREDICTED: 60S ribosomal protein L21-1 [Sesamum indicum]                                 |
| c28022.graph_c0 | 3.58059824    | 3.80362348    | 3.94389471    | 27.8824089     | 30.9774854     | 27.7788863     | 2.765E-24 | 1.84307  | up        | PREDICTED: uncharacterized protein LOC105178683 [Sesamum indicum]                        |
| c28025.graph_c0 | 81.2593957    | 89.3854557    | 79.5592691    | 23.5081667     | 26.6297521     | 27.9499209     | 4.31E-149 | -2.7695  | down      | PREDICTED: probable mitochondrial chaperone BCS1-B [Sesamum indicum]                     |
| c28031.graph_c0 | 10.3213707    | 10.5436385    | 9.38638495    | 50.452482      | 49.6003914     | 50.6016981     | 4.739E-41 | 1.227    | up        | PREDICTED: serine acetyltransferase 1, chloroplastic-like [Sesamum indicum]              |
| c28033.graph_c0 | 1.44047719    | 1.04609854    | 1.81477472    | 8.25227584     | 9.61961511     | 8.91138338     | 3.637E-16 | 1.54347  | up        | PREDICTED: ATP sulfurylase 2 [Sesamum indicum]                                           |
| c28034.graph_c0 | 0.45793189    | 0.36115611    | 0.39230708    | 6.2025967      | 6.19227158     | 5.01189003     | 7.512E-37 | 2.75485  | up        | PREDICTED: phyto-sulfokine receptor 2-like [Sesamum indicum]                             |
| c28035.graph_c0 | 0.03140662    | 0.22006647    | 0.12107625    | 5.40979741     | 4.55478188     | 4.56335812     | 3.031E-26 | 4.18927  | up        | PREDICTED: ADP-ribosylation factor GTPase-activating protein AGD3-like [Sesamum indicum] |
| c28036.graph_c0 | 0.15564349    | 0             | 0             | 8.1446968      | 8.7838221      | 7.19983992     | 3.945E-15 | 6.21662  | up        | PREDICTED: MADS-box protein SVP-like isoform X2 [Nicotiana sylvestris]                   |
| c28041.graph_c0 | 0.25444783    | 0.08490087    | 0.16348777    | 2.58903707     | 2.97773068     | 2.89229532     | 1.85E-10  | 2.98613  | up        | PREDICTED: uncharacterized protein LOC105158497 [Sesamum indicum]                        |
| c28043.graph_c1 | 1.64646237    | 2.07343003    | 2.25227058    | 10.2679377     | 9.30583839     | 10.9614157     | 7.776E-08 | 1.2608   | up        | PREDICTED: uncharacterized protein LOC105176055 isoform X2 [Sesamum indicum]             |
| c28049.graph_c0 | 0.27174964    | 0.18134784    | 0             | 12.2453764     | 12.6613919     | 11.9798083     | 3.649E-27 | 5.27887  | up        | -                                                                                        |
| c28056.graph_c0 | 12.4253844    | 12.8860365    | 12.5147626    | 67.4454815     | 69.2711945     | 70.768721      | 1.206E-23 | 1.36516  | up        | hypothetical protein MIMGU_mgv1a01/015mg [Erythranthe guttata]                           |
| c28063.graph_c0 | 0.67928371    | 0.42497744    | 0.32733992    | 4.56672021     | 4.84768724     | 4.17961799     | 2.138E-06 | 2.16443  | up        | hypothetical protein MIMGU_mgv1a014814mg [Erythranthe guttata]                           |
| c28065.graph_c0 | 0.5242006     | 0.32795344    | 0.67361852    | 3.52412027     | 2.88095489     | 2.48705155     | 0.0005996 | 1.44641  | up        | hypothetical protein MIMGU_mgv1a01/254mg [Erythranthe guttata]                           |
| c28072.graph_c0 | 198.493523    | 183.280961    | 193.992839    | 83.7346706     | 93.5055459     | 102.76597      | 7.11E-135 | -2.12986 | down      | PREDICTED: uncharacterized protein LOC104888288 [Beta vulgaris subsp. vulgaris]          |
| c28078.graph_c0 | 4.19414264    | 2.87664204    | 2.69481967    | 28.1683532     | 32.5180313     | 28.8350731     | 1.089E-27 | 2.11051  | up        | hypothetical protein MIMGU_mgv1a00/042mg [Erythranthe guttata]                           |
| c28080.graph_c0 | 0.8954879     | 1.43893317    | 1.12045484    | 1.02763491     | 0.86600078     | 1.27178824     | 0.0007448 | -1.21639 | down      | PREDICTED: receptor-like protein kinase HSL1 [Sesamum indicum]                           |

| #ID             | 0 h-1<br>FPKM | 0 h-2<br>FPKM | 0 h-3<br>FPKM | 28 h-1<br>FPKM | 28 h-2<br>FPKM | 28 h-3<br>FPKM | FDR       | log2FC   | regulated | nr_annotation                                                                                                  |
|-----------------|---------------|---------------|---------------|----------------|----------------|----------------|-----------|----------|-----------|----------------------------------------------------------------------------------------------------------------|
| c28081.graph_c0 | 0.80136317    | 0.87856234    | 0.83363418    | 0.13867289     | 0.02504172     | 0.2036807      | 7.971E-17 | -3.85951 | down      | PREDICTED: ent-kaurenoic acid oxidase 1-like [Sesamum indicum]                                                 |
| c28093.graph_c0 | 4386.13677    | 4135.01396    | 4879.89869    | 571.850921     | 623.612114     | 643.248635     | 4.007E-75 | -3.95749 | down      | hypothetical protein MIMGU_mgv1a010458mg [Erythranthe diffusa]                                                 |
| c28095.graph_c0 | 2.71875862    | 3.06166618    | 1.52849921    | 12.5351111     | 13.6039376     | 12.7982821     | 2.155E-06 | 1.32967  | up        | PREDICTED: transcription factor TCP2-like [Sesamum indicum]                                                    |
| c28098.graph_c0 | 25.4807645    | 15.972379     | 16.2924204    | 0              | 0              | 0              | 1.605E-40 | -Inf     | down      | hypothetical protein GYMLUDRAFT_153379 [Gymnopus luxurians FD-317 M1]                                          |
| c28103.graph_c0 | 6.44589236    | 5.37695579    | 5.13560067    | 5.4344114      | 5.52715942     | 5.83612465     | 2.003E-09 | -1.10145 | down      | hypothetical protein MIMGU_mgv1a006429mg [Erythranthe diffusa]                                                 |
| c28105.graph_c0 | 0.58816115    | 0.58875011    | 1.07073135    | 7.96166853     | 9.48836179     | 8.02271676     | 5.38E-28  | 2.40276  | up        | PREDICTED: probable receptor-like serine/threonine-protein kinase At5g57670 [Sesamum indicum]                  |
| c28106.graph_c0 | 1.21782295    | 0.87074458    | 0.96877901    | 12.1386061     | 11.302524      | 11.6246222     | 1.33E-18  | 2.43146  | up        | PREDICTED: protein GLUTAMINE DUMPER 5-like [Sesamum indicum]                                                   |
| c28107.graph_c1 | 5.37034887    | 6.11550534    | 7.59755331    | 53.4264478     | 52.0865595     | 50.0530622     | 3.03E-62  | 1.93202  | up        | PREDICTED: isoaspartyl peptidase/L-asparaginase 1 [Sesamum indicum]                                            |
| c28115.graph_c0 | 2.26394451    | 1.51080767    | 1.31609305    | 11.9097199     | 14.644379      | 11.2207243     | 4.728E-12 | 1.8061   | up        | PREDICTED: CASP-like protein 5A1 [Sesamum indicum]                                                             |
| c28116.graph_c0 | 4.94836881    | 5.70811606    | 4.5420356     | 43.9451441     | 37.8227715     | 38.9053462     | 1.043E-41 | 1.89997  | up        | PREDICTED: coatomer subunit alpha-1-like [Sesamum indicum]                                                     |
| c28117.graph_c0 | 0.70203915    | 0.95572931    | 0.59541775    | 3.87780889     | 3.78693004     | 3.57228343     | 2.673E-09 | 1.23026  | up        | PREDICTED: protein STICHEL [Sesamum indicum]                                                                   |
| c28118.graph_c0 | 0.08732436    | 0.20978832    | 0.22443052    | 9.43117255     | 8.90513588     | 9.41513545     | 2.565E-90 | 4.63481  | up        | PREDICTED: phosphoenolpyruvate carboxylase [Sesamum indicum]                                                   |
| c28121.graph_c1 | 0             | 0             | 0             | 0.79112094     | 0.85716965     | 0.81769443     | 2.03E-11  | Inf      | up        | PREDICTED: truncated FRIGIDA-like protein 1 [Sesamum indicum]                                                  |
| c28123.graph_c0 | 7.96623088    | 8.27856694    | 7.34557767    | 7.20411559     | 7.26285061     | 6.56372336     | 2.748E-11 | -1.25554 | down      | PREDICTED: uncharacterized protein LOC105171936 [Sesamum indicum]                                              |
| c28130.graph_c0 | 62.9381511    | 58.4921438    | 65.9244265    | 56.3831272     | 60.351416      | 60.6268968     | 4.11E-26  | -1.17036 | down      | unnamed protein product [Coffea canephora]                                                                     |
| c28134.graph_c0 | 0.2340272     | 0.13386374    | 0.08592406    | 1.09343327     | 1.11890342     | 1.13016131     | 0.0001994 | 1.80148  | up        | PREDICTED: pentatricopeptide repeat-containing protein At3g24000, mitochondrial [Sesamum indicum]              |
| c28142.graph_c1 | 19.6552174    | 17.9340021    | 19.6882606    | 8.46684839     | 6.97449418     | 6.89250739     | 2.63E-102 | -2.44993 | down      | PREDICTED: trihelix transcription factor PTL [Sesamum indicum]                                                 |
| c28145.graph_c0 | 0.04488097    | 0.02246296    | 0.02883691    | 1.54941342     | 1.8849348      | 1.18445762     | 1.754E-13 | 4.49786  | up        | PREDICTED: G-type lectin S-receptor-like serine/threonine-protein kinase At2g19130 isoform X2 [Vitis vinifera] |
| c28146.graph_c0 | 0.88948183    | 1.26136106    | 1.04776776    | 5.01014459     | 4.23183979     | 4.61575153     | 0.0067487 | 1.02381  | up        | PREDICTED: T-complex protein 1 subunit gamma-like [Malus domestica]                                            |
| c28147.graph_c0 | 13.7864041    | 15.2664813    | 13.3977818    | 12.1177912     | 13.4291574     | 12.1875579     | 4.1E-25   | -1.26009 | down      | PREDICTED: uncharacterized protein LOC105164004 [Sesamum indicum]                                              |
| c28148.graph_c0 | 0.219217      | 0.13166191    | 0.16902152    | 8.92223663     | 9.37941951     | 9.38660884     | 3.771E-37 | 4.64681  | up        | PREDICTED: uncharacterized protein LOC105177785 [Sesamum indicum]                                              |
| c28150.graph_c0 | 9.49960364    | 7.88414053    | 11.5892723    | 1.31093491     | 0.78910087     | 0.96274096     | 1.117E-21 | -4.33568 | down      | -                                                                                                              |
| c28151.graph_c0 | 0.45751377    | 0.68695785    | 0.54269843    | 2.92871948     | 3.00232911     | 3.42296099     | 4.597E-08 | 1.38029  | up        | PREDICTED: uncharacterized protein LOC105163554 [Sesamum indicum]                                              |
| c28152.graph_c0 | 9.27489285    | 8.2624762     | 8.2688883     | 36.6397432     | 38.9357148     | 36.7142034     | 3.379E-19 | 1.03191  | up        | PREDICTED: probable prolyl 4-hydroxylase 4 [Sesamum indicum]                                                   |



| #ID             | 0 h-1<br>FPKM | 0 h-2<br>FPKM | 0 h-3<br>FPKM | 28 h-1<br>FPKM | 28 h-2<br>FPKM | 28 h-3<br>FPKM | FDR       | log2FC   | regulated | nr_annotation                                                                                                           |
|-----------------|---------------|---------------|---------------|----------------|----------------|----------------|-----------|----------|-----------|-------------------------------------------------------------------------------------------------------------------------|
| c28153.graph_c0 | 6.55382365    | 7.17194775    | 6.56624495    | 3.22934323     | 2.40553018     | 2.99744639     | 9.871E-27 | -2.32284 | down      | PREDICTED: probable alpha,alpha-trehalose-phosphate synthase [UDP-forming] 7 [Sesamum indicum]                          |
| c28156.graph_c0 | 46.5717805    | 42.5833036    | 46.7310325    | 206.57939      | 225.13195      | 218.872725     | 3.486E-43 | 1.16847  | up        | PREDICTED: 60S ribosomal protein L13a-4 [Sesamum indicum]                                                               |
| c28158.graph_c0 | 46.0224572    | 49.6505449    | 47.9001184    | 51.0763318     | 48.0740188     | 49.4593107     | 2.215E-23 | -1.04107 | down      | hypothetical protein MIMGU_mgv1a015858mg [Erythranthe                                                                   |
| c28160.graph_c0 | 7.31249736    | 8.24027609    | 8.32774608    | 8.0515825      | 7.38476201     | 7.79054415     | 2.373E-12 | -1.13183 | down      | unnamed protein product [Coffea canephora]                                                                              |
| c28161.graph_c0 | 1.86998308    | 1.3370397     | 1.65921587    | 9.67544725     | 9.40802338     | 9.13611952     | 2.999E-18 | 1.44586  | up        | PREDICTED: uncharacterized protein LOC105175750 [Sesamum indicum]                                                       |
| c28172.graph_c0 | 0.77184763    | 1.01406443    | 0.92986384    | 48.629469      | 47.2001484     | 43.8868326     | 4.41E-157 | 4.59251  | up        | PREDICTED: 1,4-dihydroxy-2-naphthoyl-CoA synthase, peroxisomal [Sesamum indicum]                                        |
| c28176.graph_c0 | 1.23246868    | 1.96270901    | 1.43979186    | 21.620175      | 21.1753122     | 18.8379464     | 8.209E-36 | 2.64155  | up        | PREDICTED: PRA1 family protein B1 [Sesamum indicum]                                                                     |
| c28177.graph_c0 | 0.63623994    | 0.38212622    | 1.14463091    | 4.7166383      | 6.17926431     | 7.32014939     | 1.075E-05 | 1.97438  | up        | -                                                                                                                       |
| c28178.graph_c0 | 10.5705561    | 5.18882872    | 5.74690054    | 0              | 0              | 0              | 1.345E-15 | -Inf     | down      | 60S ribosomal protein L13a [Rozella allomyces CSF55]                                                                    |
| c28179.graph_c0 | 7.23674932    | 6.44892312    | 6.12406716    | 33.0330276     | 32.4897723     | 35.8000032     | 1.351E-13 | 1.26648  | up        | PREDICTED: heavy metal-associated isoprenylated plant protein 26-like [Sesamum indicum]                                 |
| c28185.graph_c0 | 0             | 0.03425619    | 0.13192957    | 1.84054979     | 1.79658799     | 1.35980447     | 1.227E-11 | 3.78857  | up        | PREDICTED: lysosomal Pro-X carboxypeptidase [Sesamum indicum]                                                           |
| c28187.graph_c0 | 0.18789201    | 0.68962724    | 0.72434602    | 2.59461777     | 2.54819628     | 2.56291047     | 0.004473  | 1.16499  | up        | PREDICTED: pentatricopeptide repeat-containing protein At1g74600, chloroplastic [Sesamum indicum]                       |
| c28192.graph_c0 | 12.8697776    | 11.857519     | 11.668844     | 12.4302222     | 12.0969972     | 12.2889752     | 2.599E-20 | -1.07288 | down      | PREDICTED: probable WRKY transcription factor 21 isoform X1 [Sesamum indicum]                                           |
| c28196.graph_c0 | 0.75146804    | 0.81008364    | 0.96566618    | 23.022856      | 25.9843504     | 24.8886346     | 1.539E-61 | 3.77609  | up        | PREDICTED: uncharacterized protein LOC105157188 [Sesamum indicum]                                                       |
| c28198.graph_c0 | 10.2774906    | 9.98520013    | 10.9626585    | 4.73564203     | 5.33378072     | 4.86018472     | 7.961E-56 | -2.15633 | down      | PREDICTED: flavonoid 3'-monooxygenase-like [Sesamum indicum]                                                            |
| c28203.graph_c0 | 8.12679349    | 7.49468202    | 7.90496112    | 4.15643062     | 4.59232427     | 3.84903499     | 2.072E-63 | -1.99222 | down      | PREDICTED: disease resistance protein RGA2-like [Sesamum indicum]                                                       |
| c28206.graph_c0 | 0             | 0             | 0             | 1.36455869     | 1.20925248     | 1.50524479     | 1.035E-14 | Inf      | up        | PREDICTED: cytokinin dehydrogenase 3-like [Sesamum indicum]                                                             |
| c28207.graph_c0 | 0.72439552    | 0.60426741    | 0.6723        | 6.02534539     | 8.02843629     | 6.53959875     | 4.431E-15 | 2.27277  | up        | PREDICTED: piriformospora indica-insensitive protein 2-like [Sesamum indicum]                                           |
| c28208.graph_c0 | 4.26456225    | 3.59480637    | 3.51882117    | 17.3569719     | 17.6159539     | 15.6806274     | 2.595E-10 | 1.06543  | up        | PREDICTED: biotin carboxyl carrier protein of acetyl-CoA carboxylase 2, chloroplastic-like isoform X2 [Sesamum indicum] |
| c28209.graph_c0 | 11.0782775    | 9.92885514    | 13.5738844    | 4.40030844     | 3.719466       | 4.50736871     | 1.371E-14 | -2.54653 | down      | PREDICTED: zinc finger CCCH domain-containing protein 23 [Sesamum indicum]                                              |
| c28209.graph_c1 | 14.116436     | 14.4752195    | 15.6624961    | 5.50522866     | 6.10041106     | 7.55510001     | 4.788E-43 | -2.29831 | down      | PREDICTED: zinc finger CCCH domain-containing protein 20-like [Sesamum indicum]                                         |
| c28210.graph_c0 | 0.03074336    | 0             | 0             | 11.9987795     | 13.9204903     | 12.434633      | 1.988E-93 | 9.22566  | up        | PREDICTED: LRR receptor-like serine/threonine-protein kinase GSO1 [Sesamum indicum]                                     |

| #ID             | 0 h-1<br>FPKM | 0 h-2<br>FPKM | 0 h-3<br>FPKM | 28 h-1<br>FPKM | 28 h-2<br>FPKM | 28 h-3<br>FPKM | FDR       | log2FC   | regulated | nr_annotation                                                                                                           |
|-----------------|---------------|---------------|---------------|----------------|----------------|----------------|-----------|----------|-----------|-------------------------------------------------------------------------------------------------------------------------|
| c28213.graph_c0 | 3.08007553    | 3.11309335    | 2.03665055    | 18.2129223     | 17.0725158     | 16.5109138     | 4.23E-26  | 1.56825  | up        | PREDICTED: probable mitochondrial chaperone BCS1-A [Sesamum indicum]                                                    |
| c28214.graph_c0 | 1.66114017    | 1.24710266    | 2.25322149    | 8.14932293     | 9.08404264     | 9.33158563     | 3.556E-08 | 1.26811  | up        | PREDICTED: myb family transcription factor APL-like [Sesamum indicum]                                                   |
| c28215.graph_c0 | 8.34731783    | 6.18320054    | 6.65051302    | 50.9003051     | 50.6142785     | 53.0687701     | 1.447E-34 | 1.77953  | up        | Uncharacterized protein isoform 1 [Theobroma cacao]                                                                     |
| c28218.graph_c0 | 0.21827051    | 0.37143143    | 0.16829175    | 2.04642699     | 1.73314369     | 1.46275233     | 9.027E-06 | 1.70283  | up        | PREDICTED: pentatricopeptide repeat-containing protein At4g35130, chloroplastic [Sesamum indicum]                       |
| c28219.graph_c0 | 67.100205     | 65.0535516    | 76.6607825    | 32.9213063     | 39.6331372     | 39.982181      | 8.367E-25 | -1.98399 | down      | PREDICTED: light-induced protein, chloroplastic-like [Sesamum indicum]                                                  |
| c28222.graph_c0 | 236.478816    | 231.936076    | 229.20001     | 90.0030211     | 90.6642633     | 88.0874484     | 4.72E-193 | -2.46646 | down      | PREDICTED: uncharacterized protein LOC105155796 [Sesamum indicum]                                                       |
| c28223.graph_c0 | 4.92755412    | 4.70828431    | 5.46863366    | 22.2204499     | 24.9868652     | 22.1831125     | 6.306E-07 | 1.10724  | up        | PREDICTED: 50S ribosomal protein L29, chloroplastic-like [Solanum lycopersicum]                                         |
| c28224.graph_c1 | 3.53225771    | 4.36774644    | 2.93705889    | 3.32229059     | 3.95417229     | 3.57354081     | 0.0054802 | -1.08618 | down      | probable WRKY transcription factor 75-like [Solanum tuberosum]                                                          |
| c28226.graph_c0 | 0.04976265    | 0.04981248    | 0.06394698    | 4.23156331     | 2.7104146      | 3.74804256     | 2.087E-14 | 4.93737  | up        | hypothetical protein MIMGU_mgv1a020800mg [Erythranthe outtata]                                                          |
| c28228.graph_c1 | 3.09350378    | 2.54609453    | 2.73852266    | 1.79867258     | 2.43604904     | 2.2423227      | 8.367E-06 | -1.46071 | down      | PREDICTED: LOW QUALITY PROTEIN: omega-hydroxypalmitate O-feruloyl transferase [Sesamum indicum]                         |
| c28230.graph_c0 | 20.5152463    | 17.7396215    | 19.1248744    | 1.76394917     | 1.20202318     | 2.14547323     | 1.2E-199  | -4.57658 | down      | PREDICTED: inorganic pyrophosphatase 2 [Sesamum indicum]                                                                |
| c28233.graph_c0 | 0.36569308    | 0.41597644    | 0.7262556     | 3.32229533     | 3.56694119     | 3.71648774     | 2.122E-13 | 1.71468  | up        | hypothetical protein MIMGU_mgv1a020694mg [Erythranthe outtata]                                                          |
| c28237.graph_c0 | 1.43895253    | 1.46362558    | 0.83508237    | 12.0606939     | 11.9253372     | 11.2178512     | 3.887E-36 | 2.15123  | up        | hypothetical protein MIMGU_mgv1a003410mg [Erythranthe outtata]                                                          |
| c28239.graph_c0 | 25.9110514    | 21.2928728    | 25.197523     | 158.863213     | 173.252213     | 163.219915     | 1.634E-71 | 1.68343  | up        | PREDICTED: cytochrome c oxidase subunit 6a, mitochondrial [Sesamum indicum]                                             |
| c28240.graph_c0 | 1.77790439    | 1.73574186    | 1.55132425    | 53.7606807     | 50.6582148     | 51.6265829     | 1.07E-259 | 3.85644  | up        | PREDICTED: LOW QUALITY PROTEIN: pyrophosphate--fructose 6-phosphate 1-phosphotransferase subunit beta [Sesamum indicum] |
| c28244.graph_c0 | 66.8375991    | 60.0360013    | 52.9049874    | 37.494935      | 41.0255422     | 39.3371496     | 6.706E-31 | -1.69702 | down      | -                                                                                                                       |
| c28246.graph_c0 | 4.15667685    | 4.53909724    | 4.78653387    | 30.4851286     | 25.8956636     | 27.0526326     | 3.955E-24 | 1.53734  | up        | PREDICTED: thebaine 6-O-demethylase-like isoform X2 [Sesamum indicum]                                                   |
| c28248.graph_c0 | 1.8767961     | 2.75247795    | 2.74828156    | 2.28398163     | 1.97629539     | 2.07078929     | 5.134E-05 | -1.31494 | down      | -                                                                                                                       |
| c28250.graph_c0 | 0.21478813    | 0.14333547    | 0.1840075     | 1.53504993     | 1.90282201     | 1.78334592     | 2.036E-06 | 2.17822  | up        | PREDICTED: probable glycosyltransferase At5g11130 [Sesamum indicum]                                                     |
| c28254.graph_c0 | 2.06750906    | 2.00194605    | 1.73649085    | 10.2828653     | 10.463865      | 10.2580131     | 2.5E-26   | 1.32846  | up        | PREDICTED: protein SCAR1-like isoform X2 [Sesamum indicum]                                                              |
| c28256.graph_c0 | 5.64154181    | 4.09326593    | 3.30854437    | 2.97198609     | 3.80151845     | 3.09875982     | 5.339E-05 | -1.48691 | down      | PREDICTED: malate dehydrogenase [NADP], chloroplastic [Nicotiana glauca]                                                |
| c28257.graph_c0 | 40.8207442    | 39.6693712    | 39.0987071    | 18.6771145     | 17.455807      | 20.3989823     | 1.41E-128 | -2.17035 | down      | PREDICTED: lanC-like protein GCL1 [Sesamum indicum]                                                                     |
| c28260.graph_c0 | 10.598748     | 9.68277929    | 11.1218542    | 44.267648      | 43.0674784     | 46.9641407     | 6.485E-21 | 1.00536  | up        | hypothetical protein M569_06331, partial [Genlisea aurea]                                                               |

| #ID             | 0 h-1<br>FPKM | 0 h-2<br>FPKM | 0 h-3<br>FPKM | 28 h-1<br>FPKM | 28 h-2<br>FPKM | 28 h-3<br>FPKM | FDR       | log2FC   | regulated | nr_annotation                                                                                   |
|-----------------|---------------|---------------|---------------|----------------|----------------|----------------|-----------|----------|-----------|-------------------------------------------------------------------------------------------------|
| c28264.graph_c0 | 0.63848138    | 0.69998937    | 0.66419312    | 11.0707781     | 10.6343337     | 11.4859167     | 6.111E-41 | 2.96032  | up        | hypothetical protein MIMGU_mgv1a005920mg [Erythranthe<br>cuffata]                               |
| c28267.graph_c1 | 0.09485823    | 0.37981287    | 0             | 1.86144522     | 2.6766871      | 3.82543847     | 0.0005911 | 3.06439  | up        | PREDICTED: protein YLS9 [Sesamum indicum]                                                       |
| c28269.graph_c1 | 4.0257316     | 4.60544316    | 2.74497626    | 18.2718128     | 19.6786694     | 19.4897386     | 2.095E-08 | 1.25054  | up        | PREDICTED: vesicle-fusing ATPase [Sesamum indicum]                                              |
| c28271.graph_c0 | 0             | 0             | 0             | 6.22164339     | 4.90259838     | 3.32300304     | 6.969E-09 | Inf      | up        | PREDICTED: transcription factor bHLH/9-like [Sesamum<br>indicum]                                |
| c28275.graph_c0 | 0.03595314    | 0.05398371    | 0.04620121    | 3.01807662     | 3.12612838     | 2.96379997     | 3.287E-32 | 4.97139  | up        | PREDICTED: protein argonaute 7 isoform X1 [Sesamum indicum]                                     |
| c28276.graph_c0 | 0.28330451    | 0.28358819    | 0.242705      | 4.97601533     | 4.77174342     | 4.9284708      | 2.537E-14 | 3.09169  | up        | PREDICTED: uncharacterized protein LOC105160853 [Sesamum<br>indicum]                            |
| c28279.graph_c0 | 2.2700451     | 2.18262144    | 2.07267477    | 1.0203055      | 0.88203849     | 0.86798908     | 2.112E-17 | -2.32574 | down      | PREDICTED: QWKF motif-containing protein Z-like [Sesamum<br>indicum]                            |
| c28280.graph_c0 | 26.4104309    | 27.949284     | 31.2202668    | 13.6165542     | 13.4842593     | 17.5267017     | 7.356E-25 | -2.03069 | down      | -                                                                                               |
| c28281.graph_c0 | 1.96001472    | 1.80501919    | 1.41047005    | 0              | 0              | 0              | 2.413E-29 | -Inf     | down      | PREDICTED: extracellular ribonuclease LE-like isoform X1<br>[Phoenix dactylifera]               |
| c28293.graph_c0 | 0.15330805    | 0.46038468    | 0             | 4.23408937     | 5.78478101     | 4.22780734     | 3.33E-11  | 3.45987  | up        | PREDICTED: nudix hydrolase 1 /, mitochondrial [Sesamum<br>indicum]                              |
| c28296.graph_c1 | 0.25151993    | 0.37765768    | 0.32321307    | 4.57008085     | 2.80592107     | 2.75957        | 0.0001027 | 2.31848  | up        | -                                                                                               |
| c28302.graph_c0 | 3.36936384    | 2.56730783    | 3.48966209    | 65.2413295     | 71.8431997     | 71.9660583     | 1.93E-149 | 3.37935  | up        | PREDICTED: reticulon-like protein B2 isoform X1 [Nicotiana<br>tomentosiformis]                  |
| c28305.graph_c0 | 0.74081264    | 1.01121062    | 0.77888747    | 4.1605055      | 3.53557307     | 4.15380713     | 0.003714  | 1.13745  | up        | PREDICTED: uncharacterized protein LOC105178720 [Sesamum<br>indicum]                            |
| c28307.graph_c0 | 0.14860603    | 0.29750967    | 0.28644695    | 5.88632728     | 6.77759108     | 3.78967679     | 1.89E-08  | 3.39063  | up        | -                                                                                               |
| c28308.graph_c0 | 0             | 0             | 0             | 2.76868532     | 2.35281247     | 3.62140415     | 1.383E-14 | Inf      | up        | PREDICTED: uncharacterized oxidoreductase At4g09670-like<br>[Sesamum indicum]                   |
| c28311.graph_c1 | 0.0633247     | 0.25355244    | 0.32549898    | 1.19662468     | 1.57910446     | 1.53976441     | 0.0001966 | 1.64404  | up        | PREDICTED: uncharacterized protein LOC105155826 [Sesamum<br>indicum]                            |
| c28312.graph_c0 | 0.40101606    | 0.6221973     | 0.77298226    | 10.1863927     | 9.52630454     | 10.0243594     | 1.914E-55 | 2.95163  | up        | PREDICTED: uncharacterized protein LOC105156537 [Sesamum<br>indicum]                            |
| c28317.graph_c0 | 0.4857728     | 0.91173606    | 1.24847457    | 10.3269135     | 9.12499888     | 8.46268854     | 1.775E-14 | 2.29794  | up        | PREDICTED: cyclin-P3-1-like [Sesamum indicum]                                                   |
| c28318.graph_c0 | 18.4180081    | 17.9704427    | 15.6664097    | 8.0358907      | 7.33203119     | 8.93852783     | 6.02E-94  | -2.18637 | down      | PREDICTED: pectinesterase 1-like [Sesamum indicum]                                              |
| c28321.graph_c0 | 151.958408    | 144.991047    | 155.320504    | 85.8962794     | 88.036866      | 81.9113581     | 8.57E-111 | -1.91321 | down      | PREDICTED: AP2/ERF and B3 domain-containing transcription<br>factor RAV1-like [Sesamum indicum] |
| c28326.graph_c0 | 2.18156737    | 1.84120256    | 1.81396499    | 9.17132203     | 8.39312652     | 8.80288877     | 1.755E-06 | 1.08708  | up        | PREDICTED: WEEB family protein At2g58510-like [Sesamum<br>indicum]                              |
| c28328.graph_c0 | 3.09425412    | 2.49684542    | 2.2721366     | 12.8966731     | 13.820058      | 13.763045      | 5.576E-15 | 1.27707  | up        | PREDICTED: protein ASPARTIC PROTEASE IN GUARD CELL<br>2 [Sesamum indicum]                       |
| c28329.graph_c0 | 2.4695985     | 2.89829064    | 3.28296398    | 0.12378551     | 0.11176671     | 0.75755977     | 1.539E-21 | -4.20741 | down      | PREDICTED: uncharacterized protein LOC105163289 [Sesamum<br>indicum]                            |
| c28336.graph_c0 | 6.02666034    | 5.57451576    | 6.37205461    | 2.43957276     | 2.25276696     | 2.94076464     | 5.845E-18 | -2.32586 | down      | PREDICTED: maviyanin [Sesamum indicum]                                                          |

| #ID             | 0 h-1<br>FPKM | 0 h-2<br>FPKM | 0 h-3<br>FPKM | 28 h-1<br>FPKM | 28 h-2<br>FPKM | 28 h-3<br>FPKM | FDR       | log2FC   | regulated | nr_annotation                                                                                                |
|-----------------|---------------|---------------|---------------|----------------|----------------|----------------|-----------|----------|-----------|--------------------------------------------------------------------------------------------------------------|
| c28337.graph_c0 | 1.85000861    | 0.79365476    | 1.35847675    | 8.25953582     | 6.0701285      | 10.8148896     | 0.0025569 | 1.56578  | up        | -                                                                                                            |
| c28341.graph_c0 | 0.23098545    | 0.1849734     | 0.29682545    | 1.49412216     | 1.45515746     | 1.50686588     | 5.918E-05 | 1.54956  | up        | PREDICTED: pentatricopeptide repeat-containing protein At1g53600, mitochondrial isoform X1 [Sesamum indicum] |
| c28346.graph_c1 | 0.26645469    | 0.2667215     | 0.24457487    | 18.1208306     | 19.7585895     | 16.6601526     | 8.927E-86 | 5.04175  | up        | PREDICTED: lysM domain-containing GPI-anchored protein 1 [Sesamum indicum]                                   |
| c28347.graph_c0 | 5.34714701    | 5.40347757    | 5.36615467    | 3.22005695     | 2.70689852     | 3.47318529     | 9.305E-17 | -1.86745 | down      | PREDICTED: 60S ribosomal protein L5-like [Nicotiana tomentosiformis]                                         |
| c28348.graph_c0 | 22.4992334    | 25.0919129    | 22.0808716    | 16.6394057     | 16.8491475     | 16.0569256     | 3.43E-58  | -1.58202 | down      | PREDICTED: scarecrow-like protein 4 [Sesamum indicum]                                                        |
| c28350.graph_c0 | 9.52936894    | 9.28248882    | 8.42709084    | 62.4074858     | 61.626541      | 65.4172848     | 5.552E-56 | 1.70935  | up        | PREDICTED: gamma carbonic anhydrase 1, mitochondrial [Sesamum indicum]                                       |
| c28351.graph_c0 | 3.35829492    | 2.49723147    | 1.84951797    | 0              | 0              | 0              | 3.418E-21 | -Inf     | down      | -                                                                                                            |
| c28352.graph_c0 | 5.9863192     | 6.70326606    | 7.04073708    | 1.62234052     | 1.93090091     | 1.50433706     | 6.761E-23 | -3.05721 | down      | -                                                                                                            |
| c28353.graph_c0 | 15.5665914    | 14.0127509    | 12.9520271    | 0.65114872     | 0.14698156     | 0.26566602     | 4.571E-91 | -6.41015 | down      | hypothetical protein MIMGU_mgv1a0164/5mg [Erythranthe outtata]                                               |
| c28357.graph_c0 | 2.24564729    | 1.70530039    | 2.18918638    | 17.8970785     | 20.0721906     | 18.0941029     | 1.844E-18 | 2.09942  | up        | hypothetical protein MIMGU_mgv1a015/55mg [Erythranthe outtata]                                               |
| c28360.graph_c0 | 0.15079841    | 0.03773735    | 0.04844548    | 3.01398388     | 2.49868937     | 2.14637344     | 2.073E-13 | 3.93599  | up        | -                                                                                                            |
| c28362.graph_c0 | 8.88730854    | 6.44208154    | 7.87623679    | 2.00459316     | 3.21770609     | 2.54447145     | 5.477E-11 | -2.66937 | down      | MAP kinase 20 [Theobroma cacao]                                                                              |
| c28364.graph_c0 | 0.37376394    | 0.93534551    | 0.72045218    | 11.8167521     | 8.70722719     | 10.8615239     | 3.381E-09 | 2.85645  | up        | PREDICTED: uncharacterized protein At5g50808-like [Malus domestica]                                          |
| c28364.graph_c1 | 0.74604487    | 0.18669798    | 0.7190229     | 12.199975      | 9.79149651     | 11.61426       | 6.179E-11 | 3.2542   | up        | hypothetical protein glysoja_041042 [Glycine soja]                                                           |
| c28372.graph_c0 | 0.11173369    | 0.33553672    | 0.23930369    | 6.41538466     | 7.087858       | 6.11842917     | 9.85E-27  | 3.74121  | up        | PREDICTED: endoplasmic reticulum-Golgi intermediate compartment protein 3 [Sesamum indicum]                  |
| c28382.graph_c0 | 2.3141341     | 1.55695911    | 1.75500233    | 22.8021434     | 23.9490279     | 24.9959723     | 2.049E-58 | 2.58525  | up        | hypothetical protein JCGZ_02248 [Jatropha curcas]                                                            |
| c28384.graph_c0 | 30.2889641    | 30.1068996    | 27.9478676    | 10.2936891     | 10.99992       | 10.1612731     | 1E-119    | -2.57963 | down      | PREDICTED: uncharacterized protein LOC102593344 [Solanum tuberosum]                                          |
| c28385.graph_c0 | 7.20413563    | 6.50780319    | 9.0318044     | 74.3245834     | 73.911188      | 88.8882472     | 1.993E-26 | 2.28896  | up        | hypothetical protein M569_02037, partial [Genlisea aurea]                                                    |
| c28386.graph_c0 | 25.0636073    | 26.0149755    | 27.0096451    | 14.7381197     | 14.4001648     | 16.6359617     | 4.473E-69 | -1.86134 | down      | hypothetical protein MIMGU_mgv1a002/59mg [Erythranthe outtata]                                               |
| c28387.graph_c0 | 0.20487204    | 0.30761578    | 0.13163434    | 1.53863146     | 1.05313351     | 1.21501036     | 0.0015752 | 1.47865  | up        | PREDICTED: transcription factor HBP-1b(c38)-like [Sesamum indicum]                                           |
| c28389.graph_c0 | 7.81179128    | 6.50639606    | 7.81620634    | 3.77059652     | 4.69585536     | 5.1633252      | 8.742E-18 | -1.78981 | down      | PREDICTED: endo-1,5;1,4-beta-D-glucanase-like [Sesamum indicum]                                              |
| c28393.graph_c0 | 0.39687429    | 0.6621195     | 0.6799989     | 2.6601126      | 2.3439568      | 2.64136923     | 0.0056677 | 1.04099  | up        | PREDICTED: uncharacterized protein LOC105167417 [Sesamum indicum]                                            |
| c28395.graph_c0 | 1.08222216    | 1.44440779    | 0.92713222    | 12.322661      | 12.3098466     | 12.6224735     | 3.062E-06 | 2.3435   | up        | PREDICTED: protein transport protein SEC31 homolog B [Sesamum indicum]                                       |
| c28395.graph_c1 | 7.1100379     | 8.56694887    | 6.26031791    | 43.6369586     | 44.3682943     | 45.1729868     | 4.98E-29  | 1.51361  | up        | PREDICTED: protein transport protein SEC31 homolog B [Sesamum indicum]                                       |
| c28396.graph_c0 | 0             | 0             | 0             | 2.22344052     | 1.71232916     | 1.60086116     | 3.034E-10 | Inf      | up        | PREDICTED: leucine-rich repeat extensin-like protein 3 [Vitis vinifera]                                      |

| #ID             | 0 h-1<br>FPKM | 0 h-2<br>FPKM | 0 h-3<br>FPKM | 28 h-1<br>FPKM | 28 h-2<br>FPKM | 28 h-3<br>FPKM | FDR       | log2FC   | regulated | nr_annotation                                                                               |
|-----------------|---------------|---------------|---------------|----------------|----------------|----------------|-----------|----------|-----------|---------------------------------------------------------------------------------------------|
| c28399.graph_c0 | 3.89165192    | 3.72617714    | 3.7688144     | 0.61487613     | 0.2590819      | 0.56863175     | 2.327E-34 | -4.06887 | down      | hypothetical protein MIMGU_mgv1a013527/mg [Erythranthe<br>cuffata]                          |
| c28400.graph_c0 | 9.01366711    | 10.3792517    | 12.595412     | 0.18324703     | 0.1034093      | 0.39251121     | 1.155E-43 | -6.6467  | down      | -                                                                                           |
| c28401.graph_c0 | 13.2583821    | 12.8174952    | 10.6889547    | 9.59947648     | 8.99824506     | 10.3444682     | 2.045E-24 | -1.43242 | down      | -                                                                                           |
| c28409.graph_c0 | 37.3504938    | 36.3941964    | 35.9577829    | 5.50137389     | 6.14795858     | 5.96090442     | 1.55E-214 | -3.72922 | down      | PREDICTED: uncharacterized protein LOC105172478 [Sesamum<br>indicum]                        |
| c28414.graph_c0 | 0.1132684     | 0.22676365    | 0.65499471    | 10.125707      | 9.32838854     | 8.39684374     | 8.922E-26 | 3.69498  | up        | PREDICTED: vacuole membrane protein KMS1-like [Sesamum<br>indicum]                          |
| c28414.graph_c1 | 0.14955928    | 0.07485452    | 0.28828439    | 7.60891755     | 8.39138424     | 7.18448545     | 5.19E-20  | 4.39567  | up        | PREDICTED: vacuole membrane protein KMS1-like [Sesamum<br>indicum]                          |
| c28415.graph_c0 | 19.8742326    | 20.4280158    | 18.4329362    | 15.0973355     | 15.7867257     | 15.4157758     | 2.282E-51 | -1.43275 | down      | PREDICTED: DEAD-box ATP-dependent RNA helicase 18<br>[Sesamum indicum]                      |
| c28416.graph_c0 | 0.53584134    | 1.0727558     | 0.64554125    | 10.8801587     | 11.120412      | 10.6855233     | 8.81E-34  | 2.76747  | up        | PREDICTED: serine carboxypeptidase-like 51 [Sesamum indicum]                                |
| c28425.graph_c0 | 2.75118341    | 1.74815214    | 1.47563671    | 0              | 0              | 0              | 1.36E-22  | -Inf     | down      | ATP dependent RNA helicase dbp2 [Aspergillus fumigatus var. KF-<br>701A1]                   |
| c28426.graph_c0 | 22.1569478    | 22.3221233    | 21.170854     | 19.3334787     | 19.8622909     | 19.5881709     | 1.375E-50 | -1.24932 | down      | PREDICTED: methyltransferase-like protein 1 [Sesamum indicum]                               |
| c28428.graph_c0 | 64.5639069    | 70.791766     | 63.864618     | 46.7268897     | 45.0696353     | 44.786163      | 7.694E-86 | -1.63481 | down      | PREDICTED: uncharacterized protein LOC105164194 [Sesamum<br>indicum]                        |
| c28433.graph_c0 | 99.3998819    | 100.29014     | 110.983717    | 108.604108     | 107.735666     | 107.749507     | 8.47E-18  | -1.03104 | down      | PREDICTED: iron-sulfur cluster assembly protein 1-like [Sesamum<br>indicum]                 |
| c28434.graph_c0 | 131.03845     | 116.822983    | 145.114592    | 64.1024936     | 56.8449961     | 64.7300502     | 2.404E-23 | -2.17351 | down      | Uncharacterized protein TCM_029816 [Theobroma cacao]                                        |
| c28436.graph_c0 | 0.30932448    | 0             | 0             | 5.48549202     | 7.75410681     | 6.86093296     | 3.095E-21 | 4.96295  | up        | -                                                                                           |
| c28439.graph_c0 | 33.684611     | 38.1317364    | 28.555201     | 13.7149245     | 11.4574374     | 11.4004489     | 2.372E-30 | -2.54491 | down      | PREDICTED: probable protein phosphatase 2C 25 [Sesamum<br>indicum]                          |
| c28441.graph_c0 | 0.0333178     | 0             | 0             | 0.62959475     | 0.63405714     | 0.75085687     | 6.12E-09  | 4.85995  | up        | PREDICTED: LOW QUALITY PROTEIN; protein NRT1/ PTR<br>FAMILY 2.7-like [Sesamum indicum]      |
| c28442.graph_c0 | 0.6238483     | 0.07805912    | 0.10020872    | 4.25071262     | 3.94034148     | 3.46854678     | 3.787E-08 | 2.79065  | up        | --                                                                                          |
| c28444.graph_c0 | 1.27017838    | 0.9535877     | 1.22417213    | 43.6192308     | 48.9696179     | 41.0542861     | 3.006E-24 | 4.18501  | up        | enolase [Solanum lycopersicum]                                                              |
| c28444.graph_c1 | 3.93914738    | 4.02698741    | 2.69253209    | 110.436758     | 118.798854     | 115.862777     | 1.96E-181 | 3.93112  | up        | PREDICTED: enolase [Sesamum indicum]                                                        |
| c28447.graph_c0 | 0             | 0             | 0             | 17.0785352     | 11.3011905     | 12.4723528     | 6.851E-28 | Inf      | up        | PREDICTED: putative expansin-B2 [Sesamum indicum]                                           |
| c28450.graph_c0 | 0.29853022    | 0.22986858    | 0.32460421    | 6.60924143     | 5.95245583     | 6.59155082     | 5.802E-37 | 3.39673  | up        | PREDICTED: beta-galactosidase-like [Sesamum indicum]                                        |
| c28463.graph_c0 | 31.6080866    | 30.7130504    | 32.8000211    | 27.6824337     | 25.5153638     | 24.3141609     | 4.415E-22 | -1.38683 | down      | Vacuolar protein sorting-associated protein 32-2-like protein [Morus<br>notabilis]          |
| c28547.graph_c1 | 0.09233161    | 0.09242407    | 0.05932489    | 8.75734399     | 9.39152785     | 7.72088036     | 1.1E-37   | 5.64184  | up        | PREDICTED: uncharacterized protein LOC105173291 [Sesamum<br>indicum]                        |
| c28558.graph_c0 | 0.45161367    | 0.7749701     | 0.33162368    | 3.70431237     | 3.51399596     | 3.13747429     | 0.0001499 | 1.64626  | up        | PREDICTED: thylakoid lumenal 17.9 kDa protein, chloroplastic<br>[Nicotiana tomentosiformis] |
| c28609.graph_c0 | 0.62932319    | 0.22907395    | 0.51463059    | 11.1436462     | 11.2067456     | 10.8574619     | 3.484E-52 | 3.50617  | up        | PREDICTED: allantoinase [Sesamum indicum]                                                   |

| #ID             | 0 h-1<br>FPKM | 0 h-2<br>FPKM | 0 h-3<br>FPKM | 28 h-1<br>FPKM | 28 h-2<br>FPKM | 28 h-3<br>FPKM | FDR       | log2FC   | regulated | nr_annotation                                                                                         |
|-----------------|---------------|---------------|---------------|----------------|----------------|----------------|-----------|----------|-----------|-------------------------------------------------------------------------------------------------------|
| c28614.graph_c0 | 38.2836168    | 42.6919992    | 25.8926123    | 3.17294787     | 7.0519986      | 3.98323007     | 8.05E-18  | -3.99845 | down      | -                                                                                                     |
| c28687.graph_c0 | 3.66268429    | 3.86453309    | 3.68903068    | 3.11767854     | 3.50788745     | 3.15064644     | 2.789E-10 | -1.28907 | down      | PREDICTED: pentatricopeptide repeat-containing protein At5g50390, chloroplastic [Sesamum indicum]     |
| c28711.graph_c0 | 14.3117709    | 15.6349063    | 12.3970259    | 86.8350377     | 81.998279      | 80.9371501     | 6.756E-61 | 1.47178  | up        | hypothetical protein MIMGU_mgv1a018814mg [Erythranthe guttata]                                        |
| c28741.graph_c0 | 1.65159489    | 1.53923156    | 1.2807374     | 18.2952892     | 17.733558      | 18.4583547     | 9.053E-57 | 2.51977  | up        | PREDICTED: LOW QUALITY PROTEIN: replication factor C subunit 2 [Sesamum indicum]                      |
| c28754.graph_c0 | 2.97872363    | 2.57043653    | 1.97988507    | 12.0936864     | 8.56032125     | 11.6958214     | 0.0012587 | 1.01843  | up        | -                                                                                                     |
| c28816.graph_c0 | 6.05164464    | 5.1012248     | 6.54871828    | 59.2613113     | 55.284021      | 56.5263917     | 2.071E-53 | 2.1805   | up        | hypothetical protein MIMGU_mgv1a005703mg [Erythranthe guttata]                                        |
| c28825.graph_c0 | 2.64666955    | 2.14468745    | 2.75325132    | 1.92358417     | 2.39846041     | 2.31707135     | 0.0015445 | -1.27602 | down      | PREDICTED: transcription factor GAMYB-like isoform X1 [Sesamum indicum]                               |
| c28850.graph_c0 | 31.6129873    | 30.3441781    | 27.6105811    | 21.3297963     | 22.9313141     | 20.585638      | 5.136E-67 | -1.55523 | down      | PREDICTED: cyclic dof factor 2-like [Sesamum indicum]                                                 |
| c28909.graph_c0 | 1.53850122    | 1.89543606    | 0.45623884    | 15.6974402     | 13.1637106     | 16.9148762     | 4.163E-15 | 2.47911  | up        | PREDICTED: uncharacterized protein LOC105163227 [Sesamum indicum]                                     |
| c28943.graph_c0 | 1.37994784    | 0.92088643    | 0.72245051    | 6.61196253     | 5.39981539     | 6.94115395     | 5.471E-07 | 1.56598  | up        | PREDICTED: uncharacterized protein LOC105157329 isoform X2 [Sesamum indicum]                          |
| c28984.graph_c0 | 0.26828908    | 0.98471168    | 0.68952418    | 16.2492465     | 11.795923      | 12.0394012     | 2.005E-15 | 3.27065  | up        | PREDICTED: cyclin-dependent kinase inhibitor 7-like isoform X1 [Sesamum indicum]                      |
| c29041.graph_c0 | 2.14227092    | 2.09927048    | 2.05743273    | 10.0302945     | 9.24879033     | 8.93355955     | 1.46E-11  | 1.0728   | up        | PREDICTED: protein NRT1/ PTR FAMILY 1.2 isoform X1 [Sesamum indicum]                                  |
| c29044.graph_c0 | 0.15069022    | 0             | 0             | 162.96693      | 165.24018      | 157.287799     | 9.81E-235 | 10.5946  | up        | Gip1-like protein [Populus tomentosa]                                                                 |
| c29248.graph_c0 | 0.30337157    | 0.49347244    | 0.31674864    | 3.45891659     | 4.429544       | 5.25132697     | 2.268E-10 | 2.47236  | up        | hypothetical protein MIMGU_mgv1a000889mg [Erythranthe guttata]                                        |
| c29280.graph_c1 | 0.10651454    | 0.1599318     | 0.0684377     | 2.16759636     | 2.55126694     | 2.11617218     | 2.973E-09 | 3.26599  | up        | PREDICTED: proteasome subunit beta type-3-A [Sesamum indicum]                                         |
| c29287.graph_c0 | 9.62217067    | 10.6168769    | 9.97620215    | 67.4698195     | 66.3004513     | 70.9422556     | 3.878E-32 | 1.66982  | up        | hypothetical protein MIMGU_mgv1a016558mg [Erythranthe guttata]                                        |
| c29351.graph_c0 | 2.9997934     | 3.3781469     | 2.08804553    | 13.1722384     | 15.6663419     | 13.935907      | 6.068E-05 | 1.25086  | up        | Rho GDP-dissociation inhibitor 1 [Arabidopsis thaliana]                                               |
| c29353.graph_c0 | 37.7367091    | 30.4723635    | 33.7108621    | 216.86562      | 241.470546     | 231.537979     | 4.974E-65 | 1.66926  | up        | hypothetical protein PHAVU_003G132300g [Phaseolus vulgaris]                                           |
| c29363.graph_c0 | 47.3257733    | 50.7745232    | 42.7181486    | 18.1501908     | 19.262523      | 20.3703801     | 6.873E-85 | -2.37377 | down      | PREDICTED: cell division cycle protein 48 homolog [Nicotiana sylvestris]                              |
| c29442.graph_c0 | 0.04482006    | 0.40378445    | 0.05759555    | 2.37797208     | 3.35298335     | 2.57834743     | 1.341E-08 | 2.95086  | up        | PREDICTED: uncharacterized protein LOC105176814 [Sesamum indicum]                                     |
| c29513.graph_c0 | 7.96650322    | 7.97448047    | 6.94672032    | 38.6689862     | 39.0220536     | 34.6751875     | 1.157E-16 | 1.20626  | up        | PREDICTED: ribosomal RNA-processing protein 17-like [Sesamum indicum]                                 |
| c29525.graph_c0 | 0.85691168    | 0.81262397    | 1.33298974    | 5.70352285     | 7.8134083      | 6.25886534     | 3.137E-08 | 1.6218   | up        | PREDICTED: F-box/FBD/LRR-repeat protein At1g13570-like [Sesamum indicum]                              |
| c29552.graph_c0 | 16.5943951    | 20.4719498    | 16.8290292    | 17.0805741     | 16.7171473     | 14.2567909     | 1.755E-13 | -1.25635 | down      | PREDICTED: succinate dehydrogenase assembly factor 2, mitochondrial-like isoform X1 [Sesamum indicum] |

| #ID             | 0 h-1<br>FPKM | 0 h-2<br>FPKM | 0 h-3<br>FPKM | 28 h-1<br>FPKM | 28 h-2<br>FPKM | 28 h-3<br>FPKM | FDR       | log2FC   | regulated | nr_annotation                                                                                         |
|-----------------|---------------|---------------|---------------|----------------|----------------|----------------|-----------|----------|-----------|-------------------------------------------------------------------------------------------------------|
| c29644.graph_c0 | 0.16175295    | 0.08095746    | 0             | 13.9897726     | 14.8074596     | 12.2789004     | 3.789E-36 | 6.3356   | up        | PREDICTED: homeobox-leucine zipper protein HOX21-like [Sesamum indicum]                               |
| c29668.graph_c0 | 13.3825095    | 12.329569     | 15.8281348    | 157.605271     | 169.740961     | 158.969044     | 4.22E-148 | 2.45597  | up        | PREDICTED: 20 kDa chaperonin, chloroplastic-like [Sesamum indicum]                                    |
| c29678.graph_c1 | 25.479594     | 24.2227282    | 25.5170338    | 12.10422       | 11.5361411     | 10.4256638     | 7.771E-67 | -2.23403 | down      | PREDICTED: myelin transcription factor 1 [Sesamum indicum]                                            |
| c29682.graph_c0 | 0.66166739    | 0.27597081    | 0.14171146    | 8.53590477     | 10.9274683     | 10.6930974     | 7.24E-27  | 3.73021  | up        | PREDICTED: topless-related protein 3-like [Sesamum indicum]                                           |
| c29739.graph_c0 | 84.5375655    | 82.962958     | 77.4497364    | 56.7188596     | 60.43603       | 57.8821494     | 1.231E-75 | -1.57439 | down      | PREDICTED: mitochondrial fission 1 protein A [Sesamum indicum]                                        |
| c29787.graph_c0 | 1.01790939    | 1.49842452    | 2.3852747     | 8.96476471     | 11.9450484     | 9.23274489     | 2.815E-06 | 1.51877  | up        | PREDICTED: cell division topological specificity factor homolog, chloroplastic-like [Sesamum indicum] |
| c29798.graph_c0 | 2.82753416    | 2.66054358    | 2.10742614    | 12.5768174     | 12.4318795     | 14.6560379     | 4.177E-09 | 1.2985   | up        | PREDICTED: chorismate mutase 1, chloroplastic-like isoform X1 [Sesamum indicum]                       |
| c29807.graph_c0 | 1.59721223    | 0.9326401     | 2.22352103    | 69.9731355     | 74.0972419     | 73.332144      | 5.94E-236 | 4.41824  | up        | PREDICTED: annexin D1-like [Sesamum indicum]                                                          |
| c29876.graph_c0 | 138.1294      | 140.868528    | 135.528206    | 31.9480534     | 34.2743129     | 30.5347883     | 0         | -3.18971 | down      | PREDICTED: heat stress transcription factor B-2a-like [Sesamum indicum]                               |
| c29887.graph_c0 | 0.30527121    | 1.22230759    | 0.72853039    | 9.98412117     | 8.07032552     | 8.89699905     | 6.429E-18 | 2.4841   | up        | PREDICTED: ribokinase [Sesamum indicum]                                                               |
| c29900.graph_c0 | 15.3985536    | 16.9251467    | 14.0232521    | 15.7998777     | 15.5961514     | 17.0366119     | 3.436E-19 | -1.02515 | down      | PREDICTED: remorin-like [Sesamum indicum]                                                             |
| c30136.graph_c0 | 71.4869259    | 70.6695836    | 61.4800954    | 6.53487445     | 6.41028821     | 8.55817955     | 0         | -4.33056 | down      | PREDICTED: peroxisomal membrane protein 13 [Glycine max]                                              |
| c30145.graph_c0 | 0.39657595    | 0.5954596     | 0.54146679    | 11.7273222     | 10.9465077     | 12.2888136     | 4.638E-61 | 3.41817  | up        | PREDICTED: oligopeptide transporter 3 [Sesamum indicum]                                               |
| c30224.graph_c0 | 0.47901618    | 0.2996849     | 0.23083304    | 5.30922959     | 5.10807991     | 5.53964693     | 7.266E-12 | 2.90053  | up        | PREDICTED: glucosidase 2 subunit beta [Sesamum indicum]                                               |
| c30362.graph_c0 | 1.10057778    | 1.00725014    | 1.2930615     | 4.7536533      | 5.55084504     | 5.25895058     | 7.599E-06 | 1.10107  | up        | PREDICTED: putative E3 ubiquitin-protein ligase XBAT34 isoform X2 [Sesamum indicum]                   |
| c30397.graph_c0 | 0.13062285    | 0.06537682    | 0.16785553    | 1.70884677     | 1.84294227     | 2.13034099     | 5.529E-08 | 2.86959  | up        | PREDICTED: peptidyl-prolyl cis-trans isomerase CYP20-2, chloroplastic [Sesamum indicum]               |
| c30461.graph_c0 | 1.40598168    | 2.5802142     | 2.10786582    | 19.2450184     | 21.9127764     | 17.1629785     | 6.826E-14 | 2.1641   | up        | PREDICTED: trafficking protein particle complex subunit 2-like protein [Vitis vinifera]               |
| c30490.graph_c0 | 0.95191813    | 0.97404625    | 1.16888571    | 6.68786992     | 6.26062595     | 5.41961105     | 1.125E-13 | 1.4752   | up        | PREDICTED: pentatricopeptide repeat-containing protein At3g61520, mitochondrial [Sesamum indicum]     |
| c30494.graph_c0 | 1.7030138     | 1.42059926    | 0.36474003    | 10.9333754     | 10.803116      | 9.76320027     | 2.593E-05 | 2.09845  | up        | -                                                                                                     |
| c30514.graph_c1 | 1.92862843    | 2.46454425    | 2.3729016     | 11.6312607     | 11.1482109     | 9.73437304     | 4.594E-09 | 1.17148  | up        | PREDICTED: uncharacterized protein LOC105170005 [Sesamum indicum]                                     |
| c30648.graph_c0 | 1.00648748    | 1.00749532    | 1.50893897    | 1.01598514     | 0.99072647     | 0.99484269     | 0.0012115 | -1.32735 | down      | PREDICTED: WEB family protein At1g75720 [Sesamum indicum]                                             |
| c30774.graph_c0 | 0.36960455    | 0.09249366    | 0.23747824    | 6.44703498     | 7.73110609     | 6.52111062     | 1.615E-23 | 3.79992  | up        | PREDICTED: probable 6-phosphogluconolactonase 4, chloroplastic [Sesamum indicum]                      |
| c30802.graph_c0 | 1.93148443    | 1.41288276    | 1.43194267    | 10.5284381     | 12.723673      | 11.0583128     | 7.428E-10 | 1.75696  | up        | -                                                                                                     |
| c30813.graph_c0 | 0.36799448    | 0.49115063    | 0.55170206    | 2.31795432     | 2.01239944     | 2.69165294     | 0.0042217 | 1.22152  | up        | --                                                                                                    |

| #ID             | 0 h-1<br>FPKM | 0 h-2<br>FPKM | 0 h-3<br>FPKM | 28 h-1<br>FPKM | 28 h-2<br>FPKM | 28 h-3<br>FPKM | FDR       | log2FC   | regulated | nr_annotation                                                                                          |
|-----------------|---------------|---------------|---------------|----------------|----------------|----------------|-----------|----------|-----------|--------------------------------------------------------------------------------------------------------|
| c30953.graph_c0 | 4.2618401     | 2.80807088    | 2.07973415    | 19.094597      | 20.2497758     | 19.9322072     | 9.075E-18 | 1.61333  | up        | PREDICTED: protein sym-1-like [Sesamum indicum]                                                        |
| c30987.graph_c0 | 0.55284466    | 0.69174781    | 0.17760682    | 12.6568359     | 11.3825871     | 11.1885309     | 5.449E-24 | 3.55124  | up        | -                                                                                                      |
| c30990.graph_c0 | 0             | 0             | 0             | 0.67959747     | 0.58507267     | 0.5674424      | 5.574E-14 | Inf      | up        | PREDICTED: sucrose synthase 5-like [Sesamum indicum]                                                   |
| c31059.graph_c0 | 0.7824693     | 0.7205926     | 0.98539395    | 4.53817955     | 4.40563715     | 4.0557953      | 4.259E-11 | 1.29067  | up        | hypothetical protein MIMGU_mgv1a000521mg [Erythranthe                                                  |
| c31079.graph_c0 | 2.53451683    | 2.37069052    | 3.04338369    | 11.1128292     | 12.0242518     | 11.5321023     | 3.61E-08  | 1.03149  | up        | hypothetical protein MIMGU_mgv1a018/18mg [Erythranthe                                                  |
| c31084.graph_c0 | 0.71505966    | 0.63624506    | 0.61258665    | 4.21535452     | 3.85820785     | 3.53393308     | 0.0005764 | 1.47392  | up        | PREDICTED: uncharacterized protein LOC105169539 [Sesamum indicum]                                      |
| c31162.graph_c0 | 0.12962359    | 0.19463008    | 0.33314288    | 6.3120482      | 6.71993775     | 5.91932304     | 7.151E-17 | 3.74681  | up        | -                                                                                                      |
| c31209.graph_c0 | 3.6357687     | 3.2438214     | 2.84389105    | 2.87223449     | 2.69709279     | 2.2499711      | 9.569E-06 | -1.40299 | down      | hypothetical protein MIMGU_mgv1a021/09mg [Erythranthe                                                  |
| c31272.graph_c0 | 7.02627349    | 9.43944135    | 8.3162207     | 7.59278979     | 8.12962262     | 8.60812169     | 9.326E-07 | -1.11792 | down      | PREDICTED: choline-phosphate cytidyltransferase 2-like isoform X1 [Sesamum indicum]                    |
| c31392.graph_c0 | 0.25057653    | 0.18812058    | 0.16100038    | 1.5935288      | 1.72656852     | 1.74612585     | 4.335E-05 | 1.99331  | up        | PREDICTED: transcription repressor MYB5-like [Sesamum indicum]                                         |
| c31417.graph_c0 | 1.83118465    | 0.6110061     | 1.08606682    | 5.90371129     | 6.10080092     | 6.37676339     | 3.684E-05 | 1.29636  | up        | PREDICTED: probable polygalacturonase [Sesamum indicum]                                                |
| c31482.graph_c0 | 1.98169641    | 1.7569744     | 2.54655834    | 32.797359      | 40.0907935     | 33.7467867     | 6.713E-45 | 2.98955  | up        | hypothetical protein MIMGU_mgv1a0105/8mg [Erythranthe                                                  |
| c31565.graph_c0 | 0.74818645    | 0.27234023    | 0.87404474    | 7.11854313     | 7.09689546     | 6.33306716     | 1.181E-10 | 2.34312  | up        | PREDICTED: dual specificity tyrosine-phosphorylation-regulated kinase 3-like isoform X3 [Cucumis melo] |
| c31599.graph_c0 | 57.9215481    | 56.7653164    | 58.3983734    | 36.8703384     | 43.1269221     | 38.4873363     | 1.827E-81 | -1.63783 | down      | PREDICTED: uncharacterized protein LOC105172751 isoform X2 [Sesamum indicum]                           |
| c31611.graph_c0 | 3.809044      | 5.73615832    | 4.93808891    | 23.0045961     | 24.5756908     | 22.0101069     | 4.349E-16 | 1.17157  | up        | PREDICTED: alpha/beta hydrolase domain-containing protein 17B-like [Sesamum indicum]                   |
| c31665.graph_c0 | 6.23893187    | 6.83593942    | 7.04220055    | 4.71824756     | 6.36253953     | 5.5500742      | 3.748E-08 | -1.36671 | down      | PREDICTED: synaptotagmin-3 [Sesamum indicum]                                                           |
| c31685.graph_c0 | 0.6702548     | 0.31309878    | 0.8038837     | 10.944352      | 11.7290489     | 13.0645027     | 3.775E-34 | 3.22697  | up        | PREDICTED: uncharacterized protein At1g04910 [Sesamum indicum]                                         |
| c31685.graph_c1 | 0.23303277    | 0.93306445    | 0.49909388    | 12.4202372     | 11.0613873     | 11.655034      | 1.078E-20 | 3.30604  | up        | PREDICTED: uncharacterized protein At1g04910 [Sesamum indicum]                                         |
| c31695.graph_c0 | 1.26413638    | 0.67488118    | 0.32489306    | 4.34883063     | 6.13874762     | 5.54782734     | 5.333E-05 | 1.74823  | up        | hypothetical protein MIMGU_mgv1a022283mg [Erythranthe                                                  |
| c31982.graph_c0 | 9.82888783    | 10.3481788    | 10.4232364    | 53.657757      | 55.2945066     | 53.3674109     | 5.966E-45 | 1.31591  | up        | PREDICTED: LOW QUALITY PROTEIN: probable phenylalanine--tRNA ligase alpha subunit [Sesamum indicum]    |
| c32009.graph_c0 | 3.39750251    | 2.93411377    | 4.02349973    | 23.0466623     | 24.5248636     | 22.5986724     | 2.503E-19 | 1.66684  | up        | hypothetical protein MIMGU_mgv1a010/42mg [Erythranthe                                                  |
| c32020.graph_c0 | 2.30050561    | 1.66953668    | 1.77374447    | 13.2087543     | 13.7001102     | 13.1999278     | 1.919E-13 | 1.71588  | up        | PREDICTED: uncharacterized protein LOC105165412 [Sesamum indicum]                                      |
| c32140.graph_c0 | 6.28590933    | 5.4714815     | 5.70702993    | 26.7409891     | 25.870822      | 25.4875575     | 5.511E-19 | 1.07114  | up        | PREDICTED: cytochrome P450 CYP72A219-like [Sesamum indicum]                                            |
| c32190.graph_c0 | 90.6177498    | 86.4050063    | 87.891596     | 85.7443921     | 91.7818091     | 90.3971395     | 1.022E-38 | -1.07396 | down      | glutathione peroxidase, partial [Eleutherococcus senticosus]                                           |
| c32191.graph_c0 | 0.73024081    | 0.73097204    | 1.02369639    | 4.39062438     | 4.22570604     | 5.07879187     | 0.0001952 | 1.36796  | up        | PREDICTED: structure-specific endonuclease subunit SLX1 homolog [Sesamum indicum]                      |



| #ID             | 0 h-1<br>FPKM | 0 h-2<br>FPKM | 0 h-3<br>FPKM | 28 h-1<br>FPKM | 28 h-2<br>FPKM | 28 h-3<br>FPKM | FDR       | log2FC   | regulated | nr_annotation                                                                                         |
|-----------------|---------------|---------------|---------------|----------------|----------------|----------------|-----------|----------|-----------|-------------------------------------------------------------------------------------------------------|
| c32206.graph_c0 | 1.65948116    | 1.42383676    | 2.38636793    | 29.6930665     | 33.1366057     | 32.8056283     | 4.544E-91 | 3.03187  | up        | PREDICTED: magnesium-chelatase subunit ChII, chloroplastic-like [Sesamum indicum]                     |
| c32223.graph_c0 | 3.31717611    | 3.73555998    | 3.06381752    | 15.2565049     | 16.4281937     | 13.7402099     | 1.804E-08 | 1.07685  | up        | PREDICTED: cell division topological specificity factor homolog, chloroplastic-like [Sesamum indicum] |
| c32244.graph_c0 | 5.81760121    | 5.5128439     | 5.88100033    | 31.6269287     | 31.5084807     | 33.9037283     | 2.101E-17 | 1.40469  | up        | PREDICTED: calcineurin subunit B-like isoform X1 [Sesamum indicum]                                    |
| c32295.graph_c0 | 1.02712074    | 0.69914149    | 0.52795633    | 0              | 0              | 0              | 1.719E-18 | -Inf     | down      | --                                                                                                    |
| c32333.graph_c0 | 1.64870335    | 1.2519929     | 0.94973924    | 8.51183542     | 7.49885075     | 8.36167899     | 7.063E-08 | 1.57832  | up        | Alpha-soluble NSF attachment protein 2 [Theobroma cacao]                                              |
| c32358.graph_c0 | 2.28533813    | 3.1126722     | 1.97388113    | 18.6791118     | 23.6018472     | 19.3968926     | 2.432E-18 | 1.97617  | up        | PREDICTED: uncharacterized protein LOC105174506 [Sesamum indicum]                                     |
| c32363.graph_c1 | 0.15991793    | 0.37351548    | 0.41100174    | 1.51095657     | 2.20379188     | 2.33940227     | 0.0002969 | 1.58204  | up        | PREDICTED: disease resistance response protein 206-like [Sesamum indicum]                             |
| c32364.graph_c0 | 1.01538057    | 1.01639732    | 0.86986949    | 5.82178499     | 5.70073947     | 5.01816445     | 0.0008633 | 1.42192  | up        | CTP synthase 1a [Malus domestica]                                                                     |
| c32392.graph_c0 | 1.47489552    | 1.29182586    | 1.73735755    | 0.71463038     | 1.45179951     | 0.80180726     | 1.638E-05 | -1.69692 | down      | hypothetical protein MIMGU_mgv1a018953mg, partial [Erythranthe guttata]                               |
| c32414.graph_c0 | 1.24662515    | 1.31532607    | 0.82262948    | 25.099756      | 28.0354507     | 26.5756005     | 2.92E-100 | 3.4723   | up        | hypothetical protein MIMGU_mgv1a007505mg [Erythranthe guttata]                                        |
| c32453.graph_c1 | 6.1624421     | 6.42563839    | 5.54328746    | 37.8460915     | 34.6095681     | 35.9986629     | 1.243E-29 | 1.49153  | up        | PREDICTED: mitochondrial import inner membrane translocase subunit TIM17-2-like [Sesamum indicum]     |
| c32471.graph_c0 | 16.6823588    | 17.4124218    | 15.5265716    | 10.7826916     | 11.2450148     | 10.5852012     | 6.091E-57 | -1.69523 | down      | PREDICTED: double-stranded RNA-binding protein 3-like isoform X1 [Sesamum indicum]                    |
| c32488.graph_c0 | 2.38068354    | 3.40438205    | 2.07593498    | 26.2011871     | 30.0736771     | 24.9600887     | 7.743E-26 | 2.28079  | up        | PREDICTED: 30S ribosomal protein S31, chloroplastic [Sesamum indicum]                                 |
| c32525.graph_c0 | 0             | 0.84821266    | 0.2177793     | 8.49885953     | 7.34003534     | 6.53297099     | 2.102E-09 | 3.29895  | up        | hypothetical protein MIMGU_mgv1a012575mg [Erythranthe guttata]                                        |
| c32529.graph_c0 | 2.62442529    | 3.15246391    | 3.56520414    | 80.2205166     | 77.3522305     | 76.3098747     | 9.2E-133  | 3.55169  | up        | PREDICTED: FK506-binding protein 2-like [Sesamum indicum]                                             |
| c32549.graph_c0 | 14.6502265    | 10.7778155    | 9.52647094    | 67.2216255     | 64.1697197     | 72.4385302     | 1.998E-16 | 1.4587   | up        | vacuolar ATPase subunit c [Cucumis sativus]                                                           |
| c32550.graph_c0 | 3.6642444     | 3.95748571    | 3.46956778    | 44.5026668     | 52.3311737     | 44.0340721     | 2.357E-45 | 2.57663  | up        | hypothetical protein MIMGU_mgv1a022015mg [Erythranthe guttata]                                        |
| c32563.graph_c0 | 22.282251     | 22.0951308    | 17.7447506    | 4.10567619     | 4.73677417     | 3.53632037     | 1.192E-68 | -3.41605 | down      | -                                                                                                     |
| c32594.graph_c0 | 24.8678592    | 17.1878585    | 15.5976611    | 0              | 0              | 0              | 1.688E-32 | -Inf     | down      | -                                                                                                     |
| c32609.graph_c0 | 7.67890211    | 8.43650272    | 8.18296511    | 44.6478543     | 49.2848883     | 51.0940576     | 2.284E-12 | 1.4866   | up        | hypothetical protein MIMGU_mgv1a016521mg [Erythranthe guttata]                                        |
| c32611.graph_c0 | 39.6636704    | 37.8349929    | 36.1782706    | 19.7834597     | 22.9662119     | 19.740756      | 4.649E-39 | -1.95321 | down      | -                                                                                                     |
| c32641.graph_c0 | 7.90086449    | 7.16910631    | 6.86600594    | 31.9751248     | 36.1814258     | 33.7772915     | 6.009E-17 | 1.12716  | up        | hypothetical protein MIMGU_mgv1a011069mg [Erythranthe guttata]                                        |
| c32655.graph_c0 | 3.88549272    | 3.05049683    | 2.44755489    | 1.43966268     | 2.54976543     | 1.53621545     | 7.176E-08 | -1.85091 | down      | hypothetical protein AMTR_s00033p00078670, partial [Amborella trichopoda]                             |
| c32658.graph_c0 | 1.90706085    | 0.82998717    | 1.1187744     | 0              | 0              | 0              | 9.039E-12 | -Inf     | down      | Glucose-6-phosphate isomerase 2 [Neocallimastix frontalis]                                            |

| #ID             | 0 h-1<br>FPKM | 0 h-2<br>FPKM | 0 h-3<br>FPKM | 28 h-1<br>FPKM | 28 h-2<br>FPKM | 28 h-3<br>FPKM | FDR       | log2FC   | regulated | nr_annotation                                                                                   |
|-----------------|---------------|---------------|---------------|----------------|----------------|----------------|-----------|----------|-----------|-------------------------------------------------------------------------------------------------|
| c32667.graph_c0 | 0.24301298    | 0.3040704     | 0.3122813     | 1.32465325     | 1.55484899     | 1.22502706     | 0.0098459 | 1.16181  | up        | PREDICTED: S-adenosylmethionine decarboxylase proenzyme 4 [Sesamum indicum]                     |
| c32674.graph_c0 | 25.3558486    | 24.1121767    | 18.6613269    | 18.3447188     | 18.2652968     | 21.8385409     | 3.556E-11 | -1.30699 | down      | unnamed protein product [Coffea canephora]                                                      |
| c32693.graph_c0 | 1.19626477    | 0.61491325    | 0.66475571    | 7.5194667      | 9.75972428     | 8.53262945     | 1.049E-17 | 2.2977   | up        | PREDICTED: BTB/POZ domain-containing protein At3g05675 isoform X2 [Sesamum indicum]             |
| c32721.graph_c0 | 1.13821912    | 1.22481079    | 1.42609022    | 8.41727991     | 7.73072734     | 7.81347386     | 1.654E-14 | 1.56731  | up        | PREDICTED: histone-lysine N-methyltransferase setd3 [Sesamum indicum]                           |
| c32725.graph_c0 | 0.3001718     | 0.26291333    | 0.48216581    | 28.7975337     | 31.7631629     | 25.2787457     | 1.436E-82 | 5.26094  | up        | PREDICTED: putative E3 ubiquitin-protein ligase XBAT31 [Sesamum indicum]                        |
| c32747.graph_c1 | 6.03968112    | 4.45474765    | 4.79970763    | 1.44394915     | 2.81610152     | 2.87493175     | 3.804E-14 | -2.18722 | down      | PREDICTED: protein ODORANT1-like [Sesamum indicum]                                              |
| c32765.graph_c0 | 2.98241767    | 1.83717176    | 2.21107199    | 13.0889932     | 11.9686832     | 12.4152444     | 6.166E-09 | 1.32657  | up        | hypothetical protein MIMGU_mgv1a014004mg [Erythranthe diffusa]                                  |
| c32792.graph_c1 | 9.29295874    | 9.2530459     | 8.52987136    | 4.68139164     | 5.51750131     | 5.56958529     | 7.388E-28 | -1.86911 | down      | PREDICTED: alpha/beta hydrolase domain-containing protein 17C-like [Sesamum indicum]            |
| c32815.graph_c0 | 1.06229048    | 0.54686788    | 0.62403901    | 0              | 0              | 0              | 5.173E-14 | -Inf     | down      | PREDICTED: aldehyde dehydrogenase family 2 member B7, mitochondrial-like [Solanum tuberosum]    |
| c32819.graph_c0 | 5.50723908    | 2.78958623    | 2.72848974    | 0              | 0              | 0              | 7.519E-14 | -Inf     | down      | --                                                                                              |
| c32832.graph_c0 | 4.05438797    | 3.70296334    | 3.72689641    | 59.1061866     | 53.4838673     | 49.1603689     | 7.191E-68 | 2.72582  | up        | Cytochrome P450 77A3 [Morus notabilis]                                                          |
| c32844.graph_c0 | 36.8034373    | 33.7666071    | 31.1722436    | 35.994143      | 36.7884428     | 33.8455055     | 5.176E-30 | -1.02129 | down      | PREDICTED: uncharacterized protein LOC105156000 [Sesamum indicum]                               |
| c32856.graph_c0 | 1.478013      | 0.87029       | 1.00551453    | 6.9507792      | 7.18876038     | 7.06394302     | 1.857E-05 | 1.5739   | up        | -                                                                                               |
| c32883.graph_c0 | 1.50947781    | 0.94436833    | 0.60616836    | 17.2104389     | 17.5824431     | 16.8411031     | 1.825E-21 | 2.99625  | up        | PREDICTED: uncharacterized protein LOC105167888 isoform X3 [Sesamum indicum]                    |
| c32889.graph_c0 | 1.38257699    | 0.5766506     | 0.61689797    | 0              | 0              | 0              | 1.168E-09 | -Inf     | down      | phosphoenolpyruvate carboxylase [Dendrobium catenatum]                                          |
| c32893.graph_c0 | 0.67508453    | 0.59129046    | 0.54219396    | 4.10917317     | 4.54083947     | 4.05368943     | 7.583E-05 | 1.72392  | up        | -                                                                                               |
| c32893.graph_c1 | 0.59268189    | 1.18655074    | 0.30464788    | 5.38447226     | 6.80634305     | 4.53428332     | 2.88E-05  | 1.92064  | up        | PREDICTED: RNA polymerase sigma factor sigE, chloroplastic/mitochondrial-like [Sesamum indicum] |
| c32947.graph_c0 | 110.849502    | 116.44729     | 113.390789    | 54.0121932     | 55.0144828     | 51.6924062     | 2.47E-151 | -2.17488 | down      | PREDICTED: uncharacterized protein LOC105174506 [Sesamum indicum]                               |
| c32955.graph_c0 | 2.34736609    | 4.06681723    | 2.55238785    | 0.08202174     | 0              | 0.02677163     | 1.625E-20 | -7.4545  | down      | Uncharacterized protein TCM_033752 [Theobroma cacao]                                            |
| c32968.graph_c0 | 7.2876849     | 5.37227387    | 6.24330909    | 6.19995159     | 5.19017548     | 7.30388047     | 8.162E-07 | -1.1039  | down      | PREDICTED: transcription factor DIVARICATA [Sesamum indicum]                                    |
| c32986.graph_c0 | 0.68964474    | 0.86291914    | 0.92314666    | 0.0835383      | 0.11314088     | 0.15337479     | 1.25E-18  | -3.91387 | down      | PREDICTED: nucleoprotein TPR-like [Phoenix dactylifera]                                         |
| c32989.graph_c1 | 3.35152678    | 1.54143265    | 2.59962693    | 0              | 0              | 0              | 1.449E-18 | -Inf     | down      | hypothetical protein CHLNCDRAFT_59390 [Chlorella variabilis]                                    |
| c32997.graph_c0 | 7.35476974    | 6.58717291    | 5.47173018    | 228.164361     | 205.248962     | 211.203249     | 5.905E-82 | 3.96627  | up        | -                                                                                               |
| c32998.graph_c0 | 203.362964    | 201.806297    | 195.028611    | 41.03611       | 45.3564646     | 45.2738335     | 0         | -3.27843 | down      | PREDICTED: cytochrome P450 CYP82D4-like [Sesamum indicum]                                       |

| #ID             | 0 h-1<br>FPKM | 0 h-2<br>FPKM | 0 h-3<br>FPKM | 28 h-1<br>FPKM | 28 h-2<br>FPKM | 28 h-3<br>FPKM | FDR       | log2FC   | regulated | nr_annotation                                                                   |
|-----------------|---------------|---------------|---------------|----------------|----------------|----------------|-----------|----------|-----------|---------------------------------------------------------------------------------|
| c33046.graph_c0 | 1.31151944    | 1.14159368    | 1.90518324    | 6.71387707     | 7.59621177     | 6.62827097     | 2.819E-05 | 1.16748  | up        | PREDICTED: E3 ubiquitin-protein ligase RING1-like [Sesamum indicum]             |
| c33052.graph_c0 | 0.68591139    | 0.21126099    | 0.40681075    | 4.67838507     | 4.34532751     | 3.95833432     | 4.62E-14  | 2.22981  | up        | PREDICTED: uncharacterized protein LOC105165576 [Sesamum indicum]               |
| c33085.graph_c0 | 12.9225782    | 14.7560727    | 11.9317362    | 13.009736      | 12.2490989     | 15.2141426     | 3.702E-09 | -1.05708 | down      | PREDICTED: uncharacterized protein LOC105171255 [Sesamum indicum]               |
| c33101.graph_c1 | 3.10871924    | 4.38485439    | 2.90532894    | 2.15669926     | 4.82187883     | 2.76547697     | 0.0026493 | -1.18433 | down      | PREDICTED: E3 ubiquitin-protein ligase RHA1B-like [Sesamum indicum]             |
| c33104.graph_c0 | 1.56109463    | 1.11618416    | 1.0030342     | 0.36469111     | 0.80491127     | 0.69436493     | 1.767E-07 | -2.06677 | down      | hypothetical protein MIMGU_mgv1a001450mg [Erythranthe outtata]                  |
| c33108.graph_c0 | 1.11620127    | 1.02610926    | 1.02454487    | 19.4368553     | 21.3764999     | 19.9267163     | 5.42E-102 | 3.17169  | up        | unnamed protein product [Coffea canephora]                                      |
| c33114.graph_c0 | 3.43614575    | 4.28702089    | 5.24750482    | 4.16228487     | 3.79083258     | 3.86893175     | 0.0004106 | -1.22939 | down      | PREDICTED: uncharacterized protein LOC105172002 isoform X2 [Sesamum indicum]    |
| c33115.graph_c0 | 2.63172072    | 1.39465905    | 1.88986591    | 0              | 0              | 0              | 2.653E-23 | -Inf     | down      | --                                                                              |
| c33125.graph_c0 | 9.02732222    | 8.25736501    | 8.60034582    | 0.22624158     | 1.2256496      | 1.29227896     | 3.976E-31 | -4.32584 | down      | -                                                                               |
| c33126.graph_c0 | 6.63961022    | 4.99429851    | 6.51008893    | 26.5549143     | 28.9633273     | 27.1312638     | 2.376E-19 | 1.09626  | up        | hypothetical protein MIMGU_mgv1a010921mg [Erythranthe outtata]                  |
| c33148.graph_c0 | 1.38654401    | 0.76701529    | 0.70332787    | 0              | 0              | 0              | 3.379E-13 | -Inf     | down      | PREDICTED: serpin-ZX-like isoform X2 [Pyrus x bretschneideri]                   |
| c33167.graph_c0 | 6.35116868    | 6.61182955    | 9.14088359    | 8.30878703     | 8.00219271     | 5.1225929      | 0.0021373 | -1.14194 | down      | hypothetical protein EUGRSUZ_A02667 [Eucalyptus grandis]                        |
| c33253.graph_c0 | 3.90726761    | 3.64601539    | 4.93589198    | 3.46549372     | 2.30330338     | 2.08158573     | 4.292E-08 | -1.76495 | down      | PREDICTED: uncharacterized protein LOC105179909 [Sesamum indicum]               |
| c33309.graph_c0 | 6.61061767    | 6.61723721    | 6.04445194    | 2.95665158     | 3.79580788     | 3.27963295     | 1.752E-18 | -2.03164 | down      | PREDICTED: transcription factor DIVARICATA-like [Sesamum indicum]               |
| c33310.graph_c0 | 0.06813807    | 0             | 0.02918671    | 15.5335127     | 16.2610079     | 15.6655476     | 1.06E-150 | 7.84894  | up        | PREDICTED: beta-xylosidase/alpha-L-arabinofuranosidase 2-like [Sesamum indicum] |
| c33328.graph_c0 | 0.30731526    | 0.30762299    | 0.23694737    | 1.83151068     | 1.53268127     | 2.40577688     | 0.0003651 | 1.67455  | up        | PREDICTED: uncharacterized protein LOC105177453 isoform X1 [Sesamum indicum]    |
| c33366.graph_c0 | 2.11798459    | 2.48207465    | 1.92510067    | 22.2640981     | 21.7295683     | 22.8853115     | 3.047E-34 | 2.26881  | up        | PREDICTED: lamin-like protein-like [Solanum tuberosum]                          |
| c33380.graph_c0 | 0             | 0             | 0             | 1.48050406     | 1.01593483     | 1.47385665     | 3.334E-14 | Inf      | up        | PREDICTED: protein PHYTOCHROME KINASE SUBSTRATE 4-like [Sesamum indicum]        |
| c33390.graph_c0 | 30.1209212    | 23.5398819    | 32.0197259    | 22.8372012     | 20.948193      | 24.03555       | 2.83E-08  | -1.42882 | down      | Uncharacterized protein isoform 2, partial [Theobroma cacao]                    |
| c33412.graph_c0 | 10.3104198    | 12.384893     | 8.89595703    | 59.4131759     | 65.0017021     | 59.3997354     | 5.006E-32 | 1.45218  | up        | PREDICTED: plastidic ATP/ADP-transporter-like [Nicotiana glauca]                |
| c33412.graph_c1 | 6.9414468     | 8.6468948     | 7.58202887    | 42.4340852     | 44.1597957     | 39.565885      | 8.455E-36 | 1.35343  | up        | PREDICTED: plastidic ATP/ADP-transporter [Sesamum indicum]                      |
| c33416.graph_c0 | 0             | 0             | 0             | 2.46857924     | 2.7905071      | 2.91841459     | 3.333E-26 | Inf      | up        | PREDICTED: uncharacterized protein LOC105176193 [Sesamum indicum]               |
| c33420.graph_c0 | 2.97469568    | 2.90999996    | 2.60631935    | 14.0201884     | 13.9750879     | 12.6699306     | 7.07E-18  | 1.17044  | up        | PREDICTED: ceramide kinase isoform X1 [Sesamum indicum]                         |
| c33422.graph_c0 | 2.06308793    | 1.00128669    | 2.89216327    | 15.9940311     | 14.9744469     | 14.6823736     | 1.676E-15 | 1.8402   | up        | hypothetical protein MIMGU_mgv1a008498mg [Erythranthe outtata]                  |

| #ID             | 0 h-1<br>FPKM | 0 h-2<br>FPKM | 0 h-3<br>FPKM | 28 h-1<br>FPKM | 28 h-2<br>FPKM | 28 h-3<br>FPKM | FDR       | log2FC   | regulated | nr_annotation                                                                                     |
|-----------------|---------------|---------------|---------------|----------------|----------------|----------------|-----------|----------|-----------|---------------------------------------------------------------------------------------------------|
| c33426.graph_c1 | 26.7865892    | 29.9615453    | 23.1336979    | 11.3499626     | 13.5216034     | 13.1847413     | 1.26E-30  | -2.15796 | down      | PREDICTED: dnaJ homolog subfamily C member 21 [Sesamum indicum]                                   |
| c33429.graph_c0 | 268.414368    | 245.710036    | 279.17083     | 95.0409578     | 109.726458     | 100.917253     | 3.82E-66  | -2.46736 | down      | hypothetical protein MIMGU_mgv1a015/16mg [Erythranthe outtata]                                    |
| c33432.graph_c0 | 0.44987949    | 0.39028598    | 0.30832691    | 2.98632434     | 2.79477858     | 2.86370379     | 3.145E-07 | 1.82606  | up        | PREDICTED: WEB family protein At2g38370 [Sesamum indicum]                                         |
| c33440.graph_c0 | 8.38115755    | 7.40254412    | 5.38505963    | 5.73306071     | 4.36760125     | 3.65478962     | 1.69E-06  | -1.70839 | down      | -                                                                                                 |
| c33444.graph_c0 | 1.09699236    | 0.93541071    | 1.30525797    | 11.1029698     | 11.0914237     | 10.1924242     | 2.022E-21 | 2.18461  | up        | PREDICTED: uncharacterized protein LOC105178046 isoform X1 [Sesamum indicum]                      |
| c33448.graph_c0 | 0.71702904    | 1.67474308    | 2.14995831    | 12.4203263     | 11.0575455     | 12.1902112     | 3.236E-08 | 1.87229  | up        | hypothetical protein MIMGU_mgv1a00/81/mg [Erythranthe outtata]                                    |
| c33454.graph_c0 | 2.74468706    | 3.32584291    | 3.52703154    | 0.73493469     | 0.56878039     | 0.25701459     | 3.071E-16 | -3.71709 | down      | -                                                                                                 |
| c33454.graph_c1 | 3.1991485     | 2.73141785    | 3.14373072    | 2.39350865     | 2.77857502     | 2.17629306     | 8.223E-05 | -1.39607 | down      | -                                                                                                 |
| c33455.graph_c0 | 1.48042556    | 1.55083393    | 1.37150161    | 12.7113977     | 12.7649964     | 12.802151      | 8.704E-26 | 2.03066  | up        | hypothetical protein MIMGU_mgv1a006888mg [Erythranthe outtata]                                    |
| c33456.graph_c0 | 3.85122789    | 3.85508431    | 2.41603763    | 132.56919      | 117.389167     | 117.832929     | 2.14E-175 | 4.09826  | up        | PREDICTED: nexose carrier protein HEX6-like [Sesamum indicum]                                     |
| c33458.graph_c0 | 1.94462046    | 2.50890948    | 2.08242856    | 17.3212539     | 18.3051256     | 17.2862814     | 2.488E-49 | 1.92632  | up        | PREDICTED: protein argonaute 10 [Sesamum indicum]                                                 |
| c33459.graph_c0 | 0.57983108    | 0.90286263    | 0.49673726    | 21.445488      | 17.6721501     | 17.5757594     | 4.402E-42 | 3.75229  | up        | -                                                                                                 |
| c33460.graph_c0 | 6.61440114    | 7.62857166    | 7.04794373    | 6.55406363     | 5.99858475     | 6.12773436     | 1.818E-26 | -1.27969 | down      | PREDICTED: protein PHLOEM PROTEIN 2-LIKE A10 [Sesamum indicum]                                    |
| c33463.graph_c0 | 0.54027516    | 0.59232246    | 0.95876067    | 0.33657332     | 0.21947911     | 0.33567243     | 0.0003231 | -2.32683 | down      | PREDICTED: 187-kDa microtubule-associated protein AIR9-like [Nicotiana glauca]                    |
| c33471.graph_c0 | 0.62858041    | 0.96628653    | 1.06738487    | 7.7664265      | 8.24982936     | 7.4157536      | 2.577E-25 | 2.0413   | up        | hypothetical protein MIMGU_mgv1a002/55mg [Erythranthe outtata]                                    |
| c33473.graph_c0 | 26.1000759    | 28.8792958    | 20.9171892    | 27.6585868     | 21.9527639     | 20.1391659     | 2.172E-08 | -1.21005 | down      | -                                                                                                 |
| c33474.graph_c0 | 0             | 0             | 0             | 1.99185707     | 1.98291763     | 2.75057387     | 2.494E-14 | Inf      | up        | 60S ribosomal protein 16 [Lichtheimia corymbifera TMRCC-FST1-96871]                               |
| c33475.graph_c0 | 6.1476594     | 6.90888471    | 5.96133892    | 5.89348426     | 4.50451162     | 6.5537082      | 6.81E-14  | -1.25435 | down      | PREDICTED: uncharacterized protein LOC102591997 [Solanum tuberosum]                               |
| c33480.graph_c0 | 0.13709011    | 0.20584107    | 0.15414544    | 1.05863568     | 0.94460348     | 0.96546608     | 0.0002636 | 1.48752  | up        | PREDICTED: uncharacterized protein LOC105159750 isoform X2 [Sesamum indicum]                      |
| c33489.graph_c0 | 7.22543633    | 6.93543844    | 5.34203854    | 2.80554539     | 2.79295413     | 2.99370279     | 9.77E-16  | -2.26906 | down      | hypothetical protein 2_207_02, partial [Pinus radiata]                                            |
| c33494.graph_c0 | 0             | 0             | 0             | 5.55233471     | 5.48322869     | 7.07915591     | 4.298E-21 | Inf      | up        | putative receptor protein kinase [Arabidopsis thaliana]                                           |
| c33494.graph_c1 | 0             | 0.04276892    | 0             | 4.08348357     | 3.42064138     | 3.58548007     | 3.428E-38 | 6.93671  | up        | PREDICTED: probable LRR receptor-like serine/threonine-protein kinase At4g36180 [Sesamum indicum] |
| c33496.graph_c0 | 4.2681701     | 5.40194072    | 4.16085815    | 34.4438007     | 34.8340408     | 36.9798635     | 6.424E-42 | 1.85239  | up        | PREDICTED: myosin heavy chain, muscle [Sesamum indicum]                                           |
| c33503.graph_c0 | 80.1748543    | 86.0690748    | 84.2955235    | 23.0516594     | 22.5697419     | 22.0856691     | 3.78E-204 | -2.9788  | down      | hypothetical protein MIMGU_mgv1a015/119mg [Erythranthe outtata]                                   |
| c33510.graph_c0 | 8.33610726    | 9.37372655    | 6.84261252    | 2.21527172     | 2.67494308     | 3.02725862     | 3.024E-27 | -2.71958 | down      | PREDICTED: non-structural maintenance of chromosomes element 4 homolog A-like [Sesamum indicum]   |

| #ID             | 0 h-1<br>FPKM | 0 h-2<br>FPKM | 0 h-3<br>FPKM | 28 h-1<br>FPKM | 28 h-2<br>FPKM | 28 h-3<br>FPKM | FDR       | log2FC   | regulated | nr_annotation                                                                            |
|-----------------|---------------|---------------|---------------|----------------|----------------|----------------|-----------|----------|-----------|------------------------------------------------------------------------------------------|
| c33512.graph_c0 | 0.53952087    | 0.74258403    | 0.38998444    | 7.18070953     | 5.70902703     | 6.13937168     | 4.695E-17 | 2.42259  | up        | PREDICTED: probable Histone-lysine N-methyltransferase ATXR5 [Sesamum indicum]           |
| c33518.graph_c0 | 1.44939576    | 1.16585928    | 1.79601197    | 6.94123583     | 6.72586699     | 6.44681988     | 1.879E-08 | 1.09441  | up        | unnamed protein product [Coffea canephora]                                               |
| c33518.graph_c1 | 1.24683606    | 0.91770925    | 1.03673945    | 6.23674187     | 6.83443956     | 5.39360832     | 4.613E-08 | 1.43825  | up        | PREDICTED: protein STICHEL isoform X2 [Sesamum indicum]                                  |
| c33519.graph_c0 | 1.02502371    | 1.33386515    | 0.92203723    | 0.2234944      | 0.16816207     | 0.45592401     | 1.378E-12 | -3.03654 | down      | PREDICTED: protein IQ-DOMAIN 1 [Sesamum indicum]                                         |
| c33520.graph_c0 | 16.1483398    | 13.5875591    | 14.4356563    | 8.70883825     | 11.2420108     | 8.60533468     | 1.719E-36 | -1.71975 | down      | -                                                                                        |
| c33525.graph_c0 | 19.6987782    | 18.7226195    | 21.9896874    | 2.53077548     | 3.2643614      | 1.88808423     | 2.841E-74 | -4.0694  | down      | PREDICTED: mitogen-activated protein kinase 9-like [Sesamum indicum]                     |
| c33528.graph_c0 | 32.9971994    | 34.6324543    | 32.3821673    | 19.7166881     | 21.1419392     | 20.3481344     | 9.565E-82 | -1.79865 | down      | -                                                                                        |
| c33538.graph_c0 | 0.77284396    | 0.89263597    | 0.53476504    | 4.40717311     | 4.29136325     | 4.47764307     | 9.322E-05 | 1.49665  | up        | -                                                                                        |
| c33540.graph_c0 | 0.92892036    | 1.77516919    | 1.62777196    | 11.2010862     | 12.9674858     | 11.2434457     | 3.252E-19 | 1.93541  | up        | PREDICTED: uncharacterized protein LOC105174130 [Sesamum indicum]                        |
| c33544.graph_c0 | 0.12569352    | 0.18872908    | 0.16152115    | 1.18759326     | 1.44346107     | 1.26724068     | 8.664E-05 | 1.94122  | up        | -                                                                                        |
| c33557.graph_c0 | 0.0239816     | 0.02400562    | 0.03081731    | 15.965597      | 15.8790132     | 14.8767199     | 9.17E-142 | 8.11724  | up        | PREDICTED: prolyl endopeptidase-like [Sesamum indicum]                                   |
| c33558.graph_c0 | 71.811315     | 73.8799793    | 77.1104292    | 26.4287611     | 27.8755743     | 27.480693      | 7.97E-122 | -2.53726 | down      | PREDICTED: uncharacterized protein LOC102628605 [Citrus sinensis]                        |
| c33565.graph_c0 | 3.91661588    | 3.25977298    | 3.95854441    | 17.3672989     | 20.705907      | 19.2608133     | 8.286E-16 | 1.27297  | up        | PREDICTED: protein FLX-like 3 [Nicotiana glauca]                                         |
| c33566.graph_c0 | 18.9745102    | 18.0292589    | 18.6830755    | 18.9355687     | 18.3319113     | 17.9356954     | 3.263E-34 | -1.10323 | down      | PREDICTED: exocyst complex component EXO70A1 [Sesamum indicum]                           |
| c33567.graph_c0 | 11.5390552    | 11.8696875    | 11.5921669    | 10.4947322     | 9.85227939     | 9.96252868     | 2.721E-28 | -1.29819 | down      | PREDICTED: WPP domain-interacting protein 1 [Sesamum indicum]                            |
| c33572.graph_c0 | 2.34996888    | 2.17411581    | 1.83018367    | 15.190349      | 14.8837284     | 14.9080268     | 4.41E-23  | 1.73602  | up        | hypothetical protein MIMGU_mgv1a022739mg, partial [Erythranthe guttata]                  |
| c33576.graph_c0 | 0             | 0.12788772    | 0.16417638    | 2.04281167     | 1.55102941     | 2.38672298     | 4.63E-09  | 3.24844  | up        | PREDICTED: pathogenesis-related protein 5-like [Sesamum indicum]                         |
| c33583.graph_c0 | 56.9118346    | 53.0603592    | 51.4674546    | 19.1766988     | 22.9439995     | 22.9106801     | 9.17E-142 | -2.40094 | down      | PREDICTED: nifU-like protein 2, chloroplastic [Sesamum indicum]                          |
| c33588.graph_c0 | 6.41683312    | 5.69883094    | 6.57190804    | 4.66371733     | 5.00242194     | 5.00730955     | 2.388E-13 | -1.43999 | down      | PREDICTED: light-induced protein, chloroplastic-like [Sesamum indicum]                   |
| c33589.graph_c0 | 4.73223879    | 4.73697741    | 4.67207555    | 62.4118714     | 58.8136841     | 55.2057677     | 1.27E-138 | 2.55036  | up        | PREDICTED: protein TRANSPARENT TESTA 12 [Sesamum indicum]                                |
| c33596.graph_c0 | 206.761828    | 196.890444    | 210.455799    | 143.405238     | 137.013149     | 153.842761     | 1.223E-77 | -1.59037 | down      | PREDICTED: uncharacterized protein LOC105160439 [Sesamum indicum]                        |
| c33599.graph_c0 | 157.350601    | 150.934988    | 142.178082    | 44.6640227     | 41.912878      | 50.4064471     | 0         | -2.80593 | down      | hypothetical protein MIMGU_mgv1a01485/mg [Erythranthe guttata]                           |
| c33599.graph_c1 | 0.04893134    | 0             | 0.18863615    | 14.1540817     | 10.9174245     | 12.188036      | 5.112E-47 | 6.17745  | up        | PREDICTED: probable plastid-lipid-associated protein 6, chloroplastic [Nicotiana glauca] |
| c33602.graph_c0 | 1.13821794    | 1.82987751    | 1.37400935    | 12.5090264     | 11.6113571     | 11.6800549     | 5.007E-23 | 1.95211  | up        | PREDICTED: protein ABIL2-like [Sesamum indicum]                                          |
| c33606.graph_c0 | 2.4955156     | 1.9775948     | 2.93959998    | 14.283095      | 13.5445222     | 14.5223616     | 1.755E-12 | 1.42097  | up        | PREDICTED: uncharacterized protein LOC105160133 isoform X1 [Sesamum indicum]             |
| c33607.graph_c0 | 0.18237379    | 0.45639101    | 0.64448322    | 4.37409114     | 5.26585892     | 5.13751745     | 7.425E-12 | 2.4226   | up        | PREDICTED: neurofilament medium polypeptide [Sesamum indicum]                            |

| #ID             | 0 h-1<br>FPKM | 0 h-2<br>FPKM | 0 h-3<br>FPKM | 28 h-1<br>FPKM | 28 h-2<br>FPKM | 28 h-3<br>FPKM | FDR       | log2FC   | regulated | nr_annotation                                                                                               |
|-----------------|---------------|---------------|---------------|----------------|----------------|----------------|-----------|----------|-----------|-------------------------------------------------------------------------------------------------------------|
| c33613.graph_c0 | 0.28145908    | 0.22539273    | 0.21701163    | 1.7183278      | 1.77313017     | 1.8027533      | 0.0001749 | 1.7831   | up        | PREDICTED: uncharacterized protein LOC105174187 [Sesamum indicum]                                           |
| c33615.graph_c0 | 0.2635421     | 0.35174134    | 0.11288735    | 2.87311324     | 2.65179969     | 4.32418369     | 1.78E-05  | 2.67885  | up        | PREDICTED: putative axial regulator YABBY 2 [Sesamum indicum]                                               |
| c33617.graph_c0 | 17.430542     | 14.2707375    | 15.6930821    | 96.1470327     | 108.064573     | 99.7998557     | 1.81E-59  | 1.59146  | up        | PREDICTED: 20 kDa chaperonin, chloroplastic-like [Sesamum indicum]                                          |
| c33622.graph_c0 | 0             | 0.03280733    | 0             | 0.90517239     | 1.01085349     | 1.20510588     | 1.238E-12 | 5.49129  | up        | PREDICTED: aldehyde dehydrogenase family 3 member F1-like [Sesamum indicum]                                 |
| c33624.graph_c0 | 0.97174121    | 0.94133638    | 0.80562963    | 8.54341825     | 7.61105358     | 8.25408967     | 4.17E-19  | 2.07841  | up        | PREDICTED: uncharacterized protein LOC105177218 isoform X2 [Sesamum indicum]                                |
| c33625.graph_c0 | 0             | 0             | 0             | 5.96737993     | 4.96704828     | 5.51604162     | 7.185E-23 | Inf      | up        | PREDICTED: growth-regulating factor 1-like [Sesamum indicum]                                                |
| c33625.graph_c1 | 0             | 0             | 0             | 12.7020075     | 14.2867507     | 11.4900484     | 2.138E-59 | Inf      | up        | PREDICTED: growth-regulating factor 1-like [Sesamum indicum]                                                |
| c33637.graph_c0 | 0.6341679     | 0.95220439    | 1.08657448    | 14.2113786     | 13.4557796     | 13.8529596     | 4.162E-16 | 2.86108  | up        | hypothetical protein MIMGU_mgv1a025918mg [Erythranthe ontifata]                                             |
| c33642.graph_c0 | 2.72129482    | 1.65092108    | 1.58953254    | 28.4087072     | 32.6853186     | 30.1258739     | 4.145E-39 | 2.85085  | up        | PREDICTED: 50S ribosomal protein L18, chloroplastic [Nicotiana tomentosiformis]                             |
| c33647.graph_c0 | 0.21202422    | 0.09095851    | 0.15569115    | 3.87446344     | 3.45852407     | 3.43097915     | 7.893E-18 | 3.46444  | up        | PREDICTED: U-box domain-containing protein 45-like [Sesamum indicum]                                        |
| c33649.graph_c0 | 22.3165817    | 25.4955161    | 19.2015844    | 7.86296204     | 9.3280656      | 7.42312604     | 4.367E-30 | -2.53408 | down      | hypothetical protein MIMGU_mgv1a010621mg [Erythranthe ontifata]                                             |
| c33657.graph_c0 | 0.82369816    | 0.41226149    | 0.92617416    | 4.11578116     | 4.39183077     | 4.27438304     | 2.354E-05 | 1.46942  | up        | PREDICTED: uncharacterized protein LOC105180227 [Sesamum indicum]                                           |
| c33659.graph_c0 | 11.8054162    | 9.39318881    | 14.7814419    | 2.42003059     | 3.17827014     | 5.02657323     | 1.849E-09 | -2.85139 | down      | -                                                                                                           |
| c33663.graph_c0 | 0.29355603    | 0.58769997    | 1.50892449    | 6.18729013     | 8.47613401     | 5.04877822     | 0.0007109 | 1.93215  | up        | hypothetical protein MIMGU_mgv1a005080mg [Erythranthe ontifata]                                             |
| c33667.graph_c0 | 8.30689252    | 7.30347396    | 8.52351335    | 8.26412388     | 8.31153705     | 8.05468546     | 6.173E-15 | -1.06204 | down      | PREDICTED: rop guanine nucleotide exchange factor 9-like [Sesamum indicum]                                  |
| c33672.graph_c0 | 12.9979819    | 13.7580403    | 13.8258631    | 59.0315643     | 62.6254216     | 59.898087      | 1.542E-33 | 1.07017  | up        | PREDICTED: carbamoyl-phosphate synthase small chain, chloroplastic [Sesamum indicum]                        |
| c33678.graph_c0 | 8.20972946    | 8.17834568    | 7.37216854    | 8.81358705     | 8.00976995     | 7.93094124     | 5.568E-21 | -1.03021 | down      | PREDICTED: U-box domain-containing protein 5 [Sesamum indicum]                                              |
| c33687.graph_c0 | 97.6515586    | 102.595896    | 97.1648796    | 26.3462319     | 25.8925953     | 27.8191488     | 0         | -2.98336 | down      | PREDICTED: probable WRKY transcription factor 4 isoform X1 [Sesamum indicum]                                |
| c33688.graph_c0 | 30.5721737    | 27.6491669    | 36.2671194    | 3.23664681     | 3.31682143     | 3.14336816     | 1.573E-38 | -4.37802 | down      | PREDICTED: peptidyl-prolyl cis-trans isomerase FKBP62 [Sesamum indicum]                                     |
| c33691.graph_c0 | 1.31387749    | 1.57823177    | 1.01303076    | 0.49110099     | 0.51732117     | 0.46752346     | 7.013E-12 | -2.49099 | down      | PREDICTED: probable LRR receptor-like serine/threonine-protein kinase At2g16250 [Nicotiana tomentosiformis] |
| c33693.graph_c0 | 7.48936881    | 7.16681748    | 7.80826083    | 1.50630267     | 1.85461374     | 1.70402207     | 1.436E-54 | -3.24039 | down      | PREDICTED: probable calcium-binding protein CML45 [Sesamum indicum]                                         |
| c33699.graph_c0 | 44.1213133    | 44.5058104    | 43.4455332    | 28.0861814     | 29.3006459     | 28.5636077     | 1.479E-85 | -1.71013 | down      | PREDICTED: trihelix transcription factor ASIL1-like [Sesamum indicum]                                       |
| c33701.graph_c0 | 93.8671965    | 91.4860221    | 88.1758263    | 63.2454465     | 65.9668598     | 70.0511997     | 2.818E-79 | -1.54645 | down      | PREDICTED: protein slowmo homolog 1-like [Sesamum indicum]                                                  |

| #ID             | 0 h-1<br>FPKM | 0 h-2<br>FPKM | 0 h-3<br>FPKM | 28 h-1<br>FPKM | 28 h-2<br>FPKM | 28 h-3<br>FPKM | FDR       | log2FC   | regulated | nr_annotation                                                                            |
|-----------------|---------------|---------------|---------------|----------------|----------------|----------------|-----------|----------|-----------|------------------------------------------------------------------------------------------|
| c33707.graph_c0 | 8.68004208    | 6.1489501     | 4.63328214    | 1.84405364     | 3.15475113     | 4.27660876     | 2.107E-05 | -2.15015 | down      | 40S ribosomal protein S12 [Pseudozyma brasiliensis GHG001]                               |
| c33713.graph_c0 | 38.0141503    | 36.917967     | 35.9327034    | 6.98681384     | 7.33985541     | 7.37035069     | 0         | -3.44302 | down      | PREDICTED: uncharacterized protein LOC105174809 [Sesamum indicum]                        |
| c33724.graph_c0 | 3.97449361    | 3.72452835    | 3.74903546    | 193.139324     | 170.75191      | 188.493243     | 1.12E-202 | 4.50283  | up        | PREDICTED: alpha-xylosidase 1-like [Sesamum indicum]                                     |
| c33735.graph_c0 | 10.6203626    | 13.2123256    | 9.98497532    | 98.6923668     | 100.710725     | 84.5165154     | 9.878E-42 | 1.97973  | up        | unnamed protein product [Coffea canephora]                                               |
| c33740.graph_c0 | 4.5505993     | 3.94467121    | 2.89370735    | 1.39795178     | 1.41614858     | 1.02942775     | 1.795E-14 | -2.65373 | down      | -                                                                                        |
| c33743.graph_c0 | 30.3353515    | 29.7161935    | 23.0348936    | 12.1438425     | 13.5728716     | 13.8537455     | 4.101E-26 | -2.15701 | down      | PREDICTED: uncharacterized protein LOC105160397 [Sesamum indicum]                        |
| c33751.graph_c0 | 2.46029839    | 1.96015752    | 2.25827203    | 9.87121126     | 9.65413689     | 10.0052574     | 8.04E-11  | 1.05471  | up        | PREDICTED: two-component response regulator-like APRR1 isoform X2 [Sesamum indicum]      |
| c33759.graph_c0 | 18.7282955    | 18.166645     | 19.6705347    | 15.2551252     | 15.9427737     | 12.7231528     | 4.192E-31 | -1.4573  | down      | PREDICTED: uncharacterized protein LOC105159346 [Sesamum indicum]                        |
| c33768.graph_c0 | 43.7196028    | 42.9529483    | 36.5526032    | 32.4812699     | 35.1009582     | 33.2586045     | 4.419E-40 | -1.37763 | down      | PREDICTED: pollen-specific leucine-rich repeat extensin-like protein 1 [Sesamum indicum] |
| c33769.graph_c0 | 31.0238986    | 31.1485034    | 32.7821508    | 418.903635     | 426.490688     | 362.548503     | 6.705E-82 | 2.57715  | up        | hypothetical protein MIMGU_mgv1a0135524mg [Erythranthe guttata]                          |
| c33774.graph_c1 | 4021.99952    | 4070.62006    | 4025.80509    | 557.12096      | 621.810496     | 659.395538     | 1.36E-193 | -3.81081 | down      | hypothetical protein MIMGU_mgv1a012797mg [Erythranthe guttata]                           |
| c33780.graph_c0 | 14.7557296    | 14.0431698    | 15.5141156    | 13.4460967     | 12.0305293     | 13.5574296     | 7.418E-33 | -1.27398 | down      | PREDICTED: homocysteine S-methyltransferase 2 [Sesamum indicum]                          |
| c33784.graph_c0 | 1.65127198    | 2.50300145    | 2.0006956     | 1.71447852     | 1.05264908     | 1.37102046     | 8.353E-07 | -1.66398 | down      | PREDICTED: probable methyltransferase PM126 [Sesamum indicum]                            |
| c33788.graph_c0 | 0             | 0.10286187    | 0             | 1.19495406     | 1.31494774     | 1.21884095     | 1.068E-09 | 4.09802  | up        | PREDICTED: WUSCHEL-related homeobox 1 [Sesamum indicum]                                  |
| c33796.graph_c0 | 3.38657107    | 3.36194599    | 2.84130871    | 21.9689881     | 20.184902      | 21.4288247     | 3.468E-36 | 1.64093  | up        | hypothetical protein MIMGU_mgv1a003584mg [Erythranthe guttata]                           |
| c33799.graph_c0 | 0.49523629    | 0.2478661     | 0.15909956    | 7.0787193      | 5.76852722     | 5.84960312     | 3.614E-20 | 3.29499  | up        | PREDICTED: beta-galactosidase 8-like isoform X1 [Sesamum indicum]                        |
| c33801.graph_c0 | 0             | 0             | 0             | 2.23804256     | 1.77203581     | 1.71384141     | 8.382E-15 | Inf      | up        | PREDICTED: sulfate transporter 3.1-like [Sesamum indicum]                                |
| c33802.graph_c0 | 0.04103234    | 0.08214685    | 0.05272818    | 1.61039155     | 2.01948969     | 1.89809584     | 4.329E-11 | 3.88273  | up        | PREDICTED: dot zinc finger protein DZF1.1-like [Sesamum indicum]                         |
| c33805.graph_c0 | 0.20154904    | 0.10087543    | 0.12949925    | 2.70996657     | 1.917798       | 3.37673103     | 5.222E-07 | 3.12824  | up        | PREDICTED: 7-methylguanosine phosphate-specific 5'-nucleotidase A [Sesamum indicum]      |
| c33806.graph_c0 | 14.5045286    | 15.1770158    | 14.3592684    | 14.7776399     | 13.1415307     | 14.4493298     | 1.391E-21 | -1.14586 | down      | PREDICTED: protein Mpv17-like [Sesamum indicum]                                          |
| c33810.graph_c0 | 1.9885819     | 1.97086452    | 1.84697695    | 11.8198953     | 12.6620001     | 12.4006346     | 2.14E-29  | 1.57762  | up        | PREDICTED: conserved oligomeric Golgi complex subunit 3 [Sesamum indicum]                |
| c33812.graph_c0 | 32.5236056    | 27.8026402    | 35.6917535    | 23.6379691     | 19.8934389     | 20.4345589     | 1.233E-13 | -1.67845 | down      | -                                                                                        |
| c33813.graph_c0 | 42.3387302    | 44.4961151    | 45.4261438    | 43.4699755     | 35.5696891     | 39.1339263     | 1.484E-34 | -1.25369 | down      | PREDICTED: uncharacterized protein C9orf85 homolog [Sesamum indicum]                     |
| c33815.graph_c0 | 57.4628091    | 58.5116176    | 62.0451516    | 6.53590243     | 8.0440436      | 7.17448167     | 1.42E-203 | -4.12445 | down      | PREDICTED: heat shock 70 kDa protein 8 [Sesamum indicum]                                 |
| c33818.graph_c0 | 0.29695994    | 0.77286899    | 0.45792634    | 4.27340976     | 3.58566594     | 2.67694068     | 0.000142  | 1.69228  | up        | unnamed protein product [Coffea canephora]                                               |

| #ID             | 0 h-1<br>FPKM | 0 h-2<br>FPKM | 0 h-3<br>FPKM | 28 h-1<br>FPKM | 28 h-2<br>FPKM | 28 h-3<br>FPKM | FDR       | log2FC   | regulated | nr_annotation                                                                                        |
|-----------------|---------------|---------------|---------------|----------------|----------------|----------------|-----------|----------|-----------|------------------------------------------------------------------------------------------------------|
| c33821.graph_c0 | 0.10709349    | 0.10720072    | 0.04587312    | 3.32095695     | 2.34258809     | 2.75221553     | 1.123E-14 | 3.9347   | up        | PREDICTED: ras GTPase-activating protein-binding protein 1-like [Sesamum indicum]                    |
| c33827.graph_c0 | 0.55581659    | 0.8559587     | 0.4395362     | 3.85319788     | 4.29273138     | 3.37238447     | 1.534E-05 | 1.54974  | up        | hypothetical protein MIMGU_mgv1a00/488mg [Erythranthe ontifata]                                      |
| c33832.graph_c0 | 1.4508947     | 1.633891      | 1.16528571    | 23.5944802     | 24.6756822     | 22.085267      | 6.852E-43 | 2.96118  | up        | PREDICTED: G-type lectin S-receptor-like serine/threonine-protein kinase At1g11330 [Sesamum indicum] |
| c33838.graph_c0 | 3.03543869    | 2.18390622    | 2.37696401    | 0.03447093     | 0              | 0.028128       | 1.964E-47 | -8.00707 | down      | -                                                                                                    |
| c33842.graph_c0 | 2.36571081    | 2.63119967    | 3.04003205    | 0.19104278     | 0.68997486     | 0.62355738     | 2.109E-14 | -3.51006 | down      | PREDICTED: ethylene-responsive transcription factor ERF109-like [Solanum tuberosum]                  |
| c33845.graph_c0 | 48.5565885    | 51.0549577    | 48.8170053    | 25.8717241     | 28.3601857     | 27.0156307     | 1.412E-98 | -1.95994 | down      | PREDICTED: transcription factor TGA1 [Sesamum indicum]                                               |
| c33851.graph_c0 | 34.3975658    | 34.5226203    | 33.0353538    | 34.0788827     | 31.1264456     | 35.5922079     | 4.596E-22 | -1.10597 | down      | PREDICTED: selenoprotein O-like [Malus domestica]                                                    |
| c33853.graph_c0 | 14.3768218    | 13.5242772    | 13.5778542    | 8.93829371     | 10.3438049     | 10.169914      | 2.343E-10 | -1.58384 | down      | -                                                                                                    |
| c33856.graph_c0 | 1.53541534    | 1.19957294    | 1.01059657    | 1.46976281     | 1.25333257     | 1.06605729     | 0.0010736 | -1.06999 | down      | -                                                                                                    |
| c33857.graph_c0 | 0.30573958    | 0.68860289    | 0.98221865    | 3.61090862     | 3.36062922     | 4.03440005     | 0.0005774 | 1.37546  | up        | PREDICTED: vesicle transport protein SFT2B isoform X1 [Nicotiana glauca]                             |
| c33864.graph_c0 | 14.3408748    | 13.2785924    | 12.4392995    | 10.6834368     | 10.5872288     | 8.9302215      | 7.334E-06 | -1.49721 | down      | -                                                                                                    |
| c33869.graph_c0 | 0.66265423    | 0.47379841    | 0.30412033    | 7.29300098     | 7.3924777      | 6.76508513     | 4.569E-17 | 2.81421  | up        | hypothetical protein MIMGU_mgv1a014159mg [Erythranthe ontifata]                                      |
| c33871.graph_c0 | 13.7154942    | 11.9933488    | 10.9396261    | 11.8588898     | 8.94875145     | 10.2844763     | 1.775E-14 | -1.32493 | down      | PREDICTED: uncharacterized protein LOC105163723 [Sesamum indicum]                                    |
| c33873.graph_c0 | 45.96523      | 36.703923     | 45.5289133    | 4.4415857      | 4.52700444     | 4.98062992     | 2.079E-58 | -4.29067 | down      | PREDICTED: RING finger and CHY zinc finger domain-containing protein 1-like [Sesamum indicum]        |
| c33874.graph_c0 | 0.15929443    | 0.21260525    | 0.27293286    | 1.81379692     | 2.23004399     | 1.95239777     | 7.431E-06 | 2.11982  | up        | -                                                                                                    |
| c33875.graph_c0 | 0.4266468     | 0.65317203    | 0.32250472    | 3.17380539     | 3.50794926     | 2.88747736     | 7.988E-08 | 1.68368  | up        | PREDICTED: probable serine/threonine-protein kinase At1g54610 isoform X2 [Sesamum indicum]           |
| c33877.graph_c0 | 6.20736275    | 7.65440828    | 7.91890467    | 50.7377532     | 54.8733607     | 55.9401668     | 1.968E-58 | 1.79797  | up        | hypothetical protein MIMGU_mgv1a00/222mg [Erythranthe ontifata]                                      |
| c33887.graph_c0 | 5.58803901    | 4.1078254     | 5.49783933    | 73.4851339     | 64.1155942     | 70.5267466     | 8.656E-73 | 2.68499  | up        | metallothionein class I type 3 [Avicennia marina]                                                    |
| c33911.graph_c0 | 6.59394844    | 6.1964359     | 5.53370437    | 2.88524673     | 3.35573141     | 2.87309016     | 8.526E-18 | -2.09652 | down      | PREDICTED: uncharacterized protein LOC105171510 [Sesamum indicum]                                    |
| c33912.graph_c0 | 3.19434873    | 2.41126524    | 1.68232155    | 18.4208357     | 15.6357248     | 15.1554767     | 8.502E-14 | 1.67189  | up        | -                                                                                                    |
| c33919.graph_c0 | 20.5139896    | 18.4276646    | 15.8091544    | 164.887307     | 166.716655     | 171.906128     | 6.13E-146 | 2.1138   | up        | PREDICTED: malate dehydrogenase, mitochondrial [Sesamum indicum]                                     |
| c33924.graph_c0 | 0.59225031    | 0.71141203    | 0.50737673    | 3.58703426     | 3.31648575     | 2.36500845     | 0.0005338 | 1.26583  | up        | PREDICTED: F-box protein At2g32560-like [Sesamum indicum]                                            |
| c33931.graph_c0 | 180.579699    | 179.955865    | 188.371675    | 10.3075797     | 12.5095155     | 18.4563089     | 0         | -4.82209 | down      | hypothetical protein MIMGU_mgv1a010609mg [Erythranthe ontifata]                                      |
| c33932.graph_c0 | 8.41775773    | 8.16955171    | 7.57749731    | 7.7328755      | 7.17834441     | 5.92984499     | 1.265E-16 | -1.3037  | down      | PREDICTED: uncharacterized protein LOC105175305 isoform X1 [Sesamum indicum]                         |



| #ID             | 0 h-1<br>FPKM | 0 h-2<br>FPKM | 0 h-3<br>FPKM | 28 h-1<br>FPKM | 28 h-2<br>FPKM | 28 h-3<br>FPKM | FDR       | log2FC   | regulated | nr_annotation                                                                                          |
|-----------------|---------------|---------------|---------------|----------------|----------------|----------------|-----------|----------|-----------|--------------------------------------------------------------------------------------------------------|
| c33943.graph_c0 | 2.33306931    | 2.45026153    | 1.76936248    | 13.0927293     | 15.0843433     | 12.9291492     | 5.536E-17 | 1.56173  | up        | PREDICTED: uncharacterized protein LOC105159044 [Sesamum indicum]                                      |
| c33952.graph_c0 | 2.49342949    | 2.53752506    | 2.45651931    | 20.8404171     | 20.0986765     | 21.4418563     | 6.144E-33 | 1.96851  | up        | PREDICTED: Golgi to ER traffic protein 4 homolog [Sesamum indicum]                                     |
| c33967.graph_c0 | 3.20188913    | 3.70112199    | 2.98795014    | 71.1432167     | 74.1411524     | 69.626571      | 9.25E-192 | 3.35201  | up        | PREDICTED: auxin-responsive protein IAA9-like [Sesamum indicum]                                        |
| c33968.graph_c0 | 11.7109947    | 10.6646136    | 11.6174699    | 54.4451898     | 56.0772914     | 55.9418423     | 2.163E-41 | 1.20122  | up        | PREDICTED: glucose-6-phosphate isomerase, cytosolic [Sesamum indicum]                                  |
| c33982.graph_c1 | 21.7316012    | 21.0058239    | 26.0066574    | 21.4934137     | 22.7879795     | 23.6946232     | 6.269E-08 | -1.10907 | down      | hypothetical protein MIMGU_mgv1a015522mg [Erythranthe outafata]                                        |
| c33985.graph_c0 | 0.03504283    | 0.07015583    | 0.09006284    | 0.86594343     | 0.80486178     | 1.01833928     | 1.143E-07 | 2.68447  | up        | PREDICTED: PI-PLC X domain-containing protein At5g67130-like isoform X2 [Nicotiana tomentosiformis]    |
| c33989.graph_c0 | 1.78708374    | 1.2384507     | 1.58986618    | 7.64318659     | 6.22450432     | 6.44059411     | 0.0008888 | 1.04749  | up        | PREDICTED: hydroxyacyl-thioester dehydratase type 2, mitochondrial-like [Sesamum indicum]              |
| c33996.graph_c0 | 611.235202    | 582.437609    | 654.740645    | 100.2461       | 117.339124     | 118.709297     | 1.2E-111  | -3.54984 | down      | PREDICTED: glutaredoxin [Sesamum indicum]                                                              |
| c34001.graph_c0 | 0.06286269    | 0             | 0.04039052    | 0.75385596     | 0.74253955     | 0.57785908     | 9.818E-08 | 3.23997  | up        | PREDICTED: 5'-3' exoribonuclease 3-like [Sesamum indicum]                                              |
| c34003.graph_c1 | 5.44525343    | 5.97607528    | 5.47986513    | 40.6247849     | 48.4766416     | 40.0361831     | 5.56E-28  | 1.84269  | up        | PREDICTED: 3-oxoacyl-[acyl-carrier-protein] reductase, chloroplastic-like isoform X2 [Sesamum indicum] |
| c34004.graph_c0 | 1.26733778    | 1.08737728    | 1.16327088    | 7.23716555     | 6.17805566     | 6.69286372     | 5.794E-06 | 1.42527  | up        | PREDICTED: SEC14 cytosolic factor [Sesamum indicum]                                                    |
| c34006.graph_c0 | 50.929112     | 57.2257588    | 61.0360927    | 29.0224692     | 25.3856758     | 27.3824256     | 2.433E-28 | -2.14111 | down      | PREDICTED: uncharacterized protein LOC105156884 [Sesamum indicum]                                      |
| c34007.graph_c0 | 249.198178    | 261.628215    | 242.405968    | 100.298376     | 119.483306     | 118.889677     | 3.82E-161 | -2.24302 | down      | -                                                                                                      |
| c34008.graph_c0 | 0.19626193    | 0.19645846    | 0.08406812    | 5.04001881     | 5.45221117     | 6.55690376     | 2.99E-16  | 4.08019  | up        | PREDICTED: acyl-protein thioesterase 1 homolog 1 [Sesamum indicum]                                     |
| c34010.graph_c0 | 0.51714305    | 0.29118425    | 0.5399463     | 8.12789867     | 7.82656512     | 7.80157708     | 2.409E-29 | 3.04633  | up        | PREDICTED: retinol dehydrogenase 11-like [Sesamum indicum]                                             |
| c34011.graph_c0 | 10.1814765    | 11.3136906    | 10.3228406    | 0.2715537      | 0.49037507     | 0.38777481     | 1.639E-76 | -5.88135 | down      | PREDICTED: uncharacterized protein LOC105163738 [Sesamum indicum]                                      |
| c34014.graph_c0 | 3.4001042     | 3.64151651    | 2.9026609     | 15.0171473     | 15.4938579     | 17.3866757     | 6.596E-18 | 1.18031  | up        | PREDICTED: NEDD8-activating enzyme E1 regulatory subunit [Sesamum indicum]                             |
| c34025.graph_c0 | 3.65065378    | 2.79447186    | 2.20763983    | 13.4848756     | 15.8677097     | 14.2893301     | 1.505E-11 | 1.24949  | up        | hypothetical protein MIMGU_mgv1a009465mg [Erythranthe outafata]                                        |
| c34026.graph_c0 | 34.4049956    | 31.0973565    | 30.4824298    | 25.9759854     | 26.1456502     | 27.2495529     | 1.286E-54 | -1.36319 | down      | PREDICTED: probable receptor-like protein kinase At5g24010 [Sesamum indicum]                           |
| c34030.graph_c0 | 18.9270343    | 17.9279935    | 17.2068992    | 14.6183796     | 13.1619502     | 14.2404587     | 4.742E-31 | -1.45273 | down      | PREDICTED: dnaJ homolog subfamily B member 4 [Sesamum indicum]                                         |
| c34031.graph_c0 | 0.30020852    | 0.50084855    | 0.77155966    | 3.05465748     | 3.80876237     | 3.14539297     | 0.0004064 | 1.568    | up        | PREDICTED: maltose excess protein 1-like, chloroplastic [Sesamum indicum]                              |
| c34032.graph_c0 | 2.40924644    | 2.94104748    | 3.77558178    | 0.64061942     | 0.30849028     | 0.55758957     | 1.181E-12 | -3.69322 | down      | PREDICTED: uncharacterized protein LOC105176742 [Sesamum indicum]                                      |
| c34034.graph_c0 | 25.6378604    | 25.5681293    | 21.9229522    | 27.2228458     | 25.8305515     | 23.4006072     | 4.381E-15 | -1.02491 | down      | hypothetical protein MIMGU_mgv1a010/04mg [Erythranthe outafata]                                        |

| #ID             | 0 h-1<br>FPKM | 0 h-2<br>FPKM | 0 h-3<br>FPKM | 28 h-1<br>FPKM | 28 h-2<br>FPKM | 28 h-3<br>FPKM | FDR       | log2FC   | regulated | nr_annotation                                                                        |
|-----------------|---------------|---------------|---------------|----------------|----------------|----------------|-----------|----------|-----------|--------------------------------------------------------------------------------------|
| c34036.graph_c0 | 0.26304655    | 0.23937269    | 0.3687548     | 4.48405686     | 4.40961202     | 4.53823724     | 1.033E-21 | 2.85102  | up        | PREDICTED: uncharacterized protein LOC105158907 [Sesamum indicum]                    |
| c34037.graph_c0 | 19.9600514    | 18.1636713    | 18.3901762    | 14.5566165     | 14.2666155     | 14.9440462     | 8.451E-46 | -1.45827 | down      | PREDICTED: cyclin-C1-2-like [Sesamum indicum]                                        |
| c34044.graph_c0 | 0             | 0             | 0             | 3.70814788     | 3.96193        | 3.68141237     | 1.885E-15 | Inf      | up        | PREDICTED: receptor-like serine/threonine-protein kinase At3g01300 [Sesamum indicum] |
| c34044.graph_c1 | 0             | 0.0749921     | 0.09627142    | 4.46484282     | 4.81793629     | 4.75402994     | 6.15E-16  | 5.24777  | up        | PREDICTED: receptor-like serine/threonine-protein kinase At3g01300 [Sesamum indicum] |
| c34050.graph_c0 | 1.24536008    | 1.4840561     | 1.21930439    | 7.86592843     | 9.59282894     | 8.12428058     | 6.886E-15 | 1.60546  | up        | PREDICTED: polygalacturonase-1 non-catalytic subunit beta-like [Sesamum indicum]     |
| c34051.graph_c0 | 155.160122    | 128.920345    | 163.32293     | 4.56007742     | 3.17145101     | 4.32438906     | 1.313E-92 | -6.3047  | down      | PREDICTED: HVA22-like protein e [Sesamum indicum]                                    |
| c34063.graph_c0 | 2.0533487     | 1.6747743     | 1.73465779    | 13.3068945     | 14.0111195     | 12.8879093     | 3.439E-39 | 1.79056  | up        | PREDICTED: homeobox-leucine zipper protein MERISTEM L1-like [Sesamum indicum]        |
| c34065.graph_c0 | 0.41454667    | 0.27664118    | 0.2367595     | 2.74508784     | 2.9319515      | 2.86825332     | 9.937E-07 | 2.11885  | up        | PREDICTED: WUSCHEL-related homeobox 9 [Sesamum indicum]                              |
| c34069.graph_c0 | 94.6321948    | 97.3658158    | 93.841366     | 83.987543      | 87.8712568     | 86.3595046     | 1.953E-52 | -1.23698 | down      | PREDICTED: uncharacterized protein LOC105174506 [Sesamum indicum]                    |
| c34071.graph_c0 | 0.82150735    | 1.19611631    | 1.03647548    | 5.55814919     | 5.47916907     | 5.35921803     | 2.647E-14 | 1.33216  | up        | PREDICTED: conserved oligomeric Golgi complex subunit 4 [Sesamum indicum]            |
| c34074.graph_c0 | 3.09795119    | 1.31883877    | 2.47095926    | 23.3438955     | 22.6429613     | 20.4422155     | 9.094E-34 | 2.18001  | up        | Phosphoribulokinase family protein [Populus trichocarpa]                             |
| c34076.graph_c0 | 0.80230215    | 0.49421879    | 0.71376233    | 6.45904889     | 5.386422       | 5.74634299     | 1.919E-08 | 2.03932  | up        | PREDICTED: uncharacterized protein ycf49 [Sesamum indicum]                           |
| c34081.graph_c0 | 1.00355862    | 1.00456353    | 0.62827278    | 9.03309843     | 10.1317279     | 8.50022887     | 6.133E-29 | 2.30594  | up        | PREDICTED: probable glycosyltransferase At3g07620 [Sesamum indicum]                  |
| c34084.graph_c0 | 0.61081395    | 0.44738458    | 0.61262058    | 6.23676026     | 6.64795597     | 6.5204676      | 1.173E-38 | 2.44636  | up        | PREDICTED: conserved oligomeric Golgi complex subunit 1 [Sesamum indicum]            |
| c34085.graph_c1 | 13.5662347    | 16.4503502    | 12.0472979    | 10.9821219     | 7.59972093     | 7.71851071     | 4.688E-13 | -1.7665  | down      | -                                                                                    |
| c34103.graph_c0 | 5.10096457    | 3.07716947    | 3.16894519    | 0              | 0              | 0              | 1.693E-28 | -Inf     | down      | carboxylesterase [Cryptococcus neoformans var. grubii H99]                           |
| c34109.graph_c0 | 1.90663785    | 1.8351414     | 1.88469625    | 0.15989232     | 0.09624518     | 0.06523541     | 6.432E-36 | -5.2227  | down      | PREDICTED: ATP-dependent 6-phosphofructokinase 6 [Sesamum indicum]                   |
| c34111.graph_c0 | 0             | 0.2155088     | 0.41499046    | 3.52066207     | 5.36868687     | 4.72421179     | 6.574E-10 | 3.31856  | up        | PREDICTED: uncharacterized protein At5g01610 [Sesamum indicum]                       |
| c34112.graph_c0 | 5.0873499     | 6.41787477    | 7.6120947     | 34.7459619     | 32.9272434     | 31.9068063     | 7.685E-18 | 1.28552  | up        | hypothetical protein M569_08891, partial [Genlisea aurea]                            |
| c34113.graph_c0 | 1.85048995    | 3.41221068    | 3.50435158    | 0              | 0              | 0.17328129     | 3.975E-13 | -6.7431  | down      | -                                                                                    |
| c34114.graph_c0 | 28.9536618    | 34.1188211    | 27.3162392    | 11.9867209     | 11.5444108     | 14.345564      | 2.303E-19 | -2.34313 | down      | hypothetical protein PRUPE_ppb013116mg [Prunus persica]                              |
| c34116.graph_c0 | 7.11396317    | 6.33711388    | 6.0385702     | 3.91336664     | 4.34715661     | 4.50929167     | 5.158E-26 | -1.69832 | down      | PREDICTED: GATA transcription factor 26 [Sesamum indicum]                            |
| c34122.graph_c0 | 39.3733105    | 21.1584167    | 23.9666508    | 0              | 0              | 0              | 2.259E-30 | -Inf     | down      | -                                                                                    |
| c34134.graph_c0 | 5.07503065    | 4.72802552    | 3.61594512    | 31.4800951     | 32.4134265     | 31.4388783     | 1.413E-33 | 1.74218  | up        | PREDICTED: F-box only protein 6-like [Sesamum indicum]                               |

| #ID             | 0 h-1<br>FPKM | 0 h-2<br>FPKM | 0 h-3<br>FPKM | 28 h-1<br>FPKM | 28 h-2<br>FPKM | 28 h-3<br>FPKM | FDR       | log2FC   | regulated | nr_annotation                                                                      |
|-----------------|---------------|---------------|---------------|----------------|----------------|----------------|-----------|----------|-----------|------------------------------------------------------------------------------------|
| c34139.graph_c0 | 8.29340796    | 8.1440851     | 7.62203422    | 0.8774356      | 0.51667962     | 0.65372113     | 5.389E-83 | -4.64375 | down      | PREDICTED: hyoscyamine 6-dioxygenase [Sesamum indicum]                             |
| c34142.graph_c0 | 0.47892337    | 0.38352235    | 0.45131936    | 3.73604516     | 3.47805932     | 3.99534705     | 1.344E-09 | 2.00315  | up        | PREDICTED: probable BOI-related E3 ubiquitin-protein ligase 2 [Sesamum indicum]    |
| c34152.graph_c1 | 1.15109959    | 2.17647646    | 1.97227806    | 0.69717712     | 0.54555416     | 0.64474295     | 7.258E-06 | -2.58415 | down      | PREDICTED: UDP-glucuronic acid decarboxylase 1-like [Nicotiana tomentosiformis]    |
| c34153.graph_c0 | 0.32571588    | 0             | 0             | 4.14274745     | 3.09928181     | 4.24970617     | 2.117E-09 | 4.08298  | up        | -                                                                                  |
| c34155.graph_c0 | 24.3538805    | 25.5281855    | 26.8178567    | 22.3758004     | 23.4196876     | 22.0963827     | 4.128E-34 | -1.2679  | down      | PREDICTED: acyl-CoA-binding domain-containing protein 1 [Sesamum indicum]          |
| c34158.graph_c0 | 0.37637809    | 0.4362426     | 0.63639571    | 6.66596754     | 5.23877691     | 5.19266476     | 7.573E-19 | 2.46284  | up        | hypothetical protein MIMGU_mgv1a022010mg [Erythranthe ontifata]                    |
| c34160.graph_c0 | 2.80760472    | 2.41826502    | 3.60788322    | 30.9404466     | 29.1360417     | 31.7525529     | 1.306E-38 | 2.2836   | up        | PREDICTED: uncharacterized protein LOC105157271 [Sesamum indicum]                  |
| c34161.graph_c0 | 8.29288931    | 8.2015221     | 7.27506527    | 6.76124287     | 7.19690585     | 6.82469304     | 1.119E-37 | -1.28274 | down      | PREDICTED: uncharacterized protein LOC105166332 [Sesamum indicum]                  |
| c34162.graph_c1 | 0.17981579    | 0.05999861    | 0.38511734    | 1.26332774     | 1.21933316     | 1.17305341     | 0.0009072 | 1.44278  | up        | PREDICTED: serine/threonine-protein kinase Aurora-2 [Sesamum indicum]              |
| c34163.graph_c0 | 1.04513087    | 0.7692481     | 0.82952134    | 6.56826346     | 7.03997823     | 6.61752623     | 4.066E-14 | 1.84706  | up        | hypothetical protein MIMGU_mgv1a004090mg [Erythranthe ontifata]                    |
| c34177.graph_c0 | 0.03781357    | 0.07570287    | 0             | 15.5552001     | 18.2633163     | 17.9405177     | 5.53E-99  | 7.75879  | up        | PREDICTED: cytochrome P450 71D95-like [Sesamum indicum]                            |
| c34185.graph_c0 | 2.9523746     | 3.94044127    | 5.05855767    | 0.08940704     | 0              | 0              | 2.198E-18 | -8.16395 | down      | hypothetical protein SORBIDRAFT_07g005790 [Sorghum bicolor]                        |
| c34187.graph_c0 | 2.73917496    | 3.63014473    | 3.27206459    | 18.7024599     | 18.5321853     | 17.434668      | 1.451E-19 | 1.41116  | up        | hypothetical protein MIMGU_mgv1a013909mg [Erythranthe ontifata]                    |
| c34191.graph_c0 | 23.0175205    | 23.3794009    | 25.0111683    | 7.99547853     | 7.66342392     | 8.43133224     | 1.084E-36 | -2.65887 | down      | Mitogen-activated protein kinase 10 [Morus notabilis]                              |
| c34193.graph_c1 | 3.03555952    | 2.21735615    | 1.37055633    | 10.3156027     | 9.96008137     | 8.61207061     | 0.0007868 | 1.04255  | up        | PREDICTED: abscisic acid receptor PYL2 [Sesamum indicum]                           |
| c34201.graph_c0 | 45.2777152    | 46.2227672    | 43.2840205    | 27.3222756     | 25.7606304     | 28.2515709     | 4.05E-108 | -1.81825 | down      | PREDICTED: uncharacterized protein LOC105177120 [Sesamum indicum]                  |
| c34203.graph_c0 | 0.61121199    | 0.35689735    | 0.42544212    | 7.88499994     | 9.05803588     | 7.53665184     | 3.202E-37 | 3.04726  | up        | PREDICTED: zinc finger CCCH domain-containing protein 46-like [Sesamum indicum]    |
| c34204.graph_c0 | 0.48672048    | 0.34800561    | 0.35740291    | 2.08878377     | 1.52094831     | 1.66319428     | 0.0032885 | 1.05775  | up        | PREDICTED: receptor protein kinase CLAVA1A1 [Sesamum indicum]                      |
| c34210.graph_c0 | 1.23512998    | 1.64204963    | 0.94239461    | 7.25161449     | 7.38338261     | 7.06179557     | 3.482E-15 | 1.41929  | up        | PREDICTED: protein DENND6A [Sesamum indicum]                                       |
| c34215.graph_c0 | 1.84418838    | 2.23467402    | 2.30749048    | 0.141089       | 0.0955426      | 0.20147307     | 2.937E-30 | -4.95555 | down      | PREDICTED: vinorine synthase-like [Sesamum indicum]                                |
| c34218.graph_c0 | 12.5829769    | 13.7842005    | 11.0504733    | 9.86905884     | 10.1173794     | 9.81361595     | 9.484E-26 | -1.41713 | down      | PREDICTED: uncharacterized protein LOC105168895 [Sesamum indicum]                  |
| c34223.graph_c0 | 0.20827172    | 0.1563602     | 0.40145611    | 2.72467235     | 2.87014428     | 1.82187934     | 1.764E-06 | 2.172    | up        | PREDICTED: putative receptor-like protein kinase At1g80870 [Sesamum indicum]       |
| c34225.graph_c0 | 2.1745378     | 2.94259657    | 2.38038684    | 10.4777421     | 11.970865      | 12.7291        | 2.214E-09 | 1.13993  | up        | PREDICTED: CAP-Gly domain-containing linker protein 1 isoform X1 [Sesamum indicum] |

| #ID             | 0 h-1<br>FPKM | 0 h-2<br>FPKM | 0 h-3<br>FPKM | 28 h-1<br>FPKM | 28 h-2<br>FPKM | 28 h-3<br>FPKM | FDR       | log2FC   | regulated | nr_annotation                                                                                  |
|-----------------|---------------|---------------|---------------|----------------|----------------|----------------|-----------|----------|-----------|------------------------------------------------------------------------------------------------|
| c34228.graph_c0 | 0             | 0             | 0             | 1.12940704     | 1.54419084     | 1.60619435     | 2.506E-14 | Inf      | up        | PREDICTED: transcription factor SPEECHLESS-like [Sesamum indicum]                              |
| c34229.graph_c0 | 0.93262725    | 1.72349748    | 1.50576113    | 6.46543736     | 6.76355293     | 6.31103795     | 4.691E-09 | 1.13646  | up        | PREDICTED: gamma-tubulin complex component 4 isoform X1 [Sesamum indicum]                      |
| c34232.graph_c0 | 9.51475593    | 9.09963393    | 9.81262164    | 43.6939338     | 48.2406255     | 43.596948      | 1.382E-21 | 1.16185  | up        | PREDICTED: probable signal peptidase complex subunit 2 [Sesamum indicum]                       |
| c34236.graph_c0 | 0.4230115     | 0.61590558    | 0.51887805    | 2.30581743     | 2.61188453     | 2.15520502     | 0.0001443 | 1.09014  | up        | PREDICTED: receptor protein kinase CLAVATA1-like [Sesamum indicum]                             |
| c34242.graph_c0 | 1.74887411    | 1.86236739    | 1.67357525    | 19.2012947     | 22.7822422     | 18.6251777     | 5.904E-37 | 2.42909  | up        | hypothetical protein MIMGU_mgv1a006918mg [Erythranthe outtata]                                 |
| c34246.graph_c0 | 1.0846981     | 1.40513258    | 0.86092589    | 6.65462113     | 6.76217826     | 6.65993382     | 5.765E-10 | 1.4959   | up        | PREDICTED: F-box/kelch-repeat protein At1g55270-like [Sesamum indicum]                         |
| c34255.graph_c0 | 0.04321715    | 0.02163021    | 0             | 4.74290654     | 4.934686       | 4.22899699     | 1.9E-45   | 6.67731  | up        | PREDICTED: subtilisin-like protease [Sesamum indicum]                                          |
| c34257.graph_c0 | 2.4359044     | 2.77700242    | 2.05783875    | 13.4911134     | 13.2616824     | 13.5634986     | 1.069E-22 | 1.38323  | up        | PREDICTED: ABC transporter B family member 25, mitochondrial [Sesamum indicum]                 |
| c34260.graph_c0 | 0.05366103    | 0.05371476    | 0.13791309    | 0.9360126      | 1.03880762     | 0.79560275     | 1.03E-06  | 2.39217  | up        | hypothetical protein MIMGU_mgv1a026552mg [Erythranthe outtata]                                 |
| c34261.graph_c0 | 39.3081028    | 38.5708692    | 40.9306076    | 13.5952892     | 15.3299473     | 15.5413275     | 2.28E-151 | -2.50877 | down      | PREDICTED: kinesin KP1-like isoform X2 [Sesamum indicum]                                       |
| c34266.graph_c0 | 9.29976489    | 10.4463853    | 9.13866818    | 8.3799559      | 10.1068288     | 6.88788781     | 4.418E-19 | -1.27842 | down      | PREDICTED: aspartic proteinase nepenthesin-2-like [Sesamum indicum]                            |
| c34267.graph_c0 | 52.2993027    | 51.1691912    | 54.7865499    | 9.75637366     | 10.0599815     | 10.7952804     | 1.19E-206 | -3.46095 | down      | hypothetical protein MIMGU_mgv1a01052/mg [Erythranthe outtata]                                 |
| c34268.graph_c0 | 0.06412093    | 0             | 0             | 3.7282175      | 5.00726839     | 3.95485355     | 1.032E-17 | 6.56909  | up        | PREDICTED: auxin transporter-like protein 2 [Sesamum indicum]                                  |
| c34279.graph_c0 | 0.15336048    | 0.15351405    | 0.49268573    | 3.62249925     | 3.17013788     | 3.72901914     | 4.556E-08 | 2.61109  | up        | -                                                                                              |
| c34284.graph_c0 | 1.6180142     | 1.19090764    | 2.20151891    | 13.6273405     | 14.7400698     | 12.7002776     | 3.902E-20 | 1.93843  | up        | PREDICTED: putative lipoyltransferase-like protein, chloroplastic isoform X1 [Sesamum indicum] |
| c34292.graph_c0 | 0.54698231    | 0.37642689    | 0.57110131    | 8.05025764     | 8.34546163     | 9.2046321      | 1.943E-29 | 3.00675  | up        | PREDICTED: probable fructokinase-6, chloroplastic [Sesamum indicum]                            |
| c34294.graph_c0 | 0.57971382    | 0.23211773    | 0.07449552    | 9.26931863     | 9.2062582      | 7.87311192     | 3.292E-23 | 3.82202  | up        | PREDICTED: ABC transporter B family member 19 [Sesamum indicum]                                |
| c34294.graph_c1 | 0.38241826    | 0.44169369    | 0.34021565    | 10.1340977     | 11.0805494     | 10.8338834     | 2.656E-51 | 3.69407  | up        | PREDICTED: ABC transporter B family member 19 [Sesamum indicum]                                |
| c34294.graph_c2 | 0.33295022    | 0.49992543    | 0.07130904    | 10.1230937     | 11.3979442     | 11.4855229     | 1.531E-31 | 4.11297  | up        | PREDICTED: ABC transporter B family member 19 [Sesamum indicum]                                |
| c34296.graph_c0 | 18.781885     | 18.7497418    | 17.2676503    | 11.467955      | 12.2917794     | 13.8253322     | 5.459E-41 | -1.63276 | down      | serine/threonine-protein phosphatase, partial [Genlisea aurea]                                 |
| c34297.graph_c1 | 0.03189573    | 0.03192767    | 0             | 0.60272241     | 0.71164854     | 0.73772485     | 1.636E-08 | 3.93696  | up        | PREDICTED: zinc finger protein 91-like [Sesamum indicum]                                       |
| c34299.graph_c0 | 1.8366291     | 1.92601432    | 2.0229781     | 0.50851484     | 0.45914122     | 0.36307596     | 1.429E-13 | -3.21317 | down      | PREDICTED: receptor-like cytosolic serine/threonine-protein kinase RBK2 [Sesamum indicum]      |
| c34304.graph_c0 | 19.3439892    | 19.4475478    | 20.9670071    | 16.2596546     | 17.5509025     | 14.5645927     | 5.946E-22 | -1.39727 | down      | PREDICTED: mitogen-activated protein kinase 9-like [Sesamum indicum]                           |
| c34305.graph_c0 | 6.91294675    | 7.2081969     | 6.13378328    | 4.9345704      | 4.64447369     | 4.51463814     | 2.076E-20 | -1.61232 | down      | PREDICTED: monoacylglycerol lipase abhd6-B [Sesamum indicum]                                   |
| c34311.graph_c1 | 14.0691597    | 16.7965341    | 18.1900048    | 6.09770617     | 6.126808       | 6.78733572     | 5.325E-20 | -2.46044 | down      | PREDICTED: vesicle transport v-SNARE 13-like isoform X2 [Sesamum indicum]                      |

| #ID             | 0 h-1<br>FPKM | 0 h-2<br>FPKM | 0 h-3<br>FPKM | 28 h-1<br>FPKM | 28 h-2<br>FPKM | 28 h-3<br>FPKM | FDR       | log2FC   | regulated | nr_annotation                                                                                     |
|-----------------|---------------|---------------|---------------|----------------|----------------|----------------|-----------|----------|-----------|---------------------------------------------------------------------------------------------------|
| c34324.graph_c0 | 17.1834914    | 18.2431646    | 18.11445      | 104.317144     | 106.197098     | 100.20963      | 1.767E-64 | 1.44559  | up        | PREDICTED: chaperone protein dnaJ 1, mitochondrial-like isoform X1 [Sesamum indicum]              |
| c34335.graph_c0 | 275.155832    | 250.574913    | 259.617161    | 91.4979188     | 105.379333     | 104.872684     | 8.63E-195 | -2.46983 | down      | PREDICTED: uncharacterized protein LOC105176201 [Sesamum indicum]                                 |
| c34337.graph_c0 | 0             | 0.06893287    | 0             | 2.05204583     | 3.20851596     | 2.9405022      | 3.252E-13 | 5.81297  | up        | PREDICTED: MLO-like protein 4 [Sesamum indicum]                                                   |
| c34342.graph_c0 | 0.28931237    | 0.28960207    | 0.18588892    | 3.36432896     | 2.80035537     | 3.17421261     | 4.16E-07  | 2.52529  | up        | -                                                                                                 |
| c34344.graph_c0 | 1.63603508    | 1.12051333    | 2.2130209     | 11.8280265     | 10.8491164     | 11.9495666     | 5.084E-09 | 1.7049   | up        | hypothetical protein MIMGU_mgv1a0142/2mg [Erythranthe guttata]                                    |
| c34351.graph_c0 | 26.5837143    | 36.219621     | 31.3143649    | 22.0714337     | 22.6542091     | 18.6122714     | 3.747E-11 | -1.66394 | down      | hypothetical protein MIMGU_mgv11b020149mg [Erythranthe guttata]                                   |
| c34359.graph_c0 | 0.88264154    | 0.48826402    | 0.56711466    | 0.45580177     | 0.73163779     | 0.3030545      | 0.0032661 | -1.46791 | down      | -                                                                                                 |
| c34360.graph_c0 | 0             | 0.09571884    | 0.12287945    | 3.30116958     | 4.45528231     | 3.17576285     | 1.511E-16 | 4.53381  | up        | PREDICTED: uncharacterized oxidoreductase At1g06690, chloroplastic [Sesamum indicum]              |
| c34362.graph_c0 | 1.15759876    | 1.18702031    | 1.66897002    | 1.27226436     | 1.27843136     | 1.33955784     | 0.0011126 | -1.14039 | down      | PREDICTED: uncharacterized protein LOC105166158 [Sesamum indicum]                                 |
| c34363.graph_c0 | 9.0094781     | 7.59826355    | 8.02222971    | 37.4320841     | 39.6633724     | 34.5831874     | 1.71E-14  | 1.09085  | up        | PREDICTED: threonine dehydratase biosynthetic, chloroplastic-like [Sesamum indicum]               |
| c34364.graph_c0 | 0.1427817     | 0.07146234    | 0.18348013    | 1.50470725     | 1.31176096     | 1.56654023     | 8.575E-06 | 2.36648  | up        | unnamed protein product [Coffea canephora]                                                        |
| c34370.graph_c1 | 4.15431181    | 4.15847172    | 3.99262612    | 55.5658188     | 57.2725166     | 59.6889664     | 1.93E-135 | 2.71969  | up        | PREDICTED: uridine 5'-monophosphate synthase [Sesamum indicum]                                    |
| c34376.graph_c0 | 8.16160689    | 7.1708545     | 8.56442687    | 0              | 0.02338807     | 0.04227343     | 3.94E-140 | -9.59342 | down      | hypothetical protein MIMGU_mgv1a019958mg [Erythranthe guttata]                                    |
| c34389.graph_c0 | 15.4784927    | 14.8601469    | 13.6520994    | 3.4771736      | 3.50892195     | 3.67185857     | 4.666E-68 | -3.13404 | down      | PREDICTED: serine/threonine-protein kinase OX11 [Sesamum indicum]                                 |
| c34389.graph_c1 | 11.4592633    | 12.4145329    | 13.4208064    | 4.16426327     | 4.09309847     | 3.44101754     | 8.75E-47  | -2.76592 | down      | PREDICTED: serine/threonine-protein kinase OX11 [Sesamum indicum]                                 |
| c34390.graph_c0 | 6.49634188    | 6.29307772    | 5.95434855    | 6.29533845     | 5.16458582     | 5.88263029     | 8.467E-20 | -1.20127 | down      | PREDICTED: ubiquitin carboxyl-terminal hydrolase 20-like [Sesamum indicum]                        |
| c34399.graph_c0 | 1.876392      | 2.04159882    | 2.30640157    | 11.0285941     | 10.8411385     | 9.4588815      | 1.207E-09 | 1.23773  | up        | PREDICTED: protein SENSITIVITY TO RED LIGHT REDUCED 1-like [Sesamum indicum]                      |
| c34400.graph_c0 | 2.25400177    | 1.62450634    | 2.20132595    | 0              | 0              | 0.05347017     | 1.873E-27 | -7.90593 | down      | PREDICTED: serine/threonine-protein kinase CDL1-like [Sesamum indicum]                            |
| c34401.graph_c0 | 0.01743838    | 0.01745584    | 0.02240901    | 11.6221632     | 8.12491148     | 8.66657431     | 8.531E-39 | 7.85945  | up        | PREDICTED: ABC transporter G family member 28 [Sesamum indicum]                                   |
| c34402.graph_c1 | 0.96339031    | 0.91613725    | 1.08324536    | 8.99739685     | 8.7876187      | 8.22738941     | 1.005E-25 | 2.04152  | up        | PREDICTED: uncharacterized protein LOC105169037 [Sesamum indicum]                                 |
| c34407.graph_c0 | 1.49303801    | 1.7483217     | 1.26700856    | 8.55820631     | 8.57762598     | 7.80205779     | 4.68E-12  | 1.37919  | up        | hypothetical protein MIMGU_mgv1a004065mg [Erythranthe guttata]                                    |
| c34409.graph_c0 | 10.9000268    | 12.3341078    | 11.3425975    | 11.9692245     | 10.8459619     | 10.6099655     | 1.353E-13 | -1.13982 | down      | hypothetical protein MIMGU_mgv1a01526/mg [Erythranthe guttata]                                    |
| c34410.graph_c0 | 7.08433936    | 7.47381446    | 6.47073628    | 3.1296974      | 2.64351213     | 3.08928329     | 3.582E-43 | -2.33532 | down      | PREDICTED: pentatricopeptide repeat-containing protein At5g18390, mitochondrial [Sesamum indicum] |

| #ID             | 0 h-1<br>FPKM | 0 h-2<br>FPKM | 0 h-3<br>FPKM | 28 h-1<br>FPKM | 28 h-2<br>FPKM | 28 h-3<br>FPKM | FDR       | log2FC   | regulated | nr_annotation                                                                      |
|-----------------|---------------|---------------|---------------|----------------|----------------|----------------|-----------|----------|-----------|------------------------------------------------------------------------------------|
| c34411.graph_c0 | 82.9953131    | 73.9079305    | 79.0164569    | 48.7529702     | 48.7066078     | 52.4901726     | 3.06E-83  | -1.74367 | down      | PREDICTED: polyadenylate-binding protein 1 isoform X1 [Sesamum indicum]            |
| c34413.graph_c0 | 46.5133807    | 29.6182932    | 34.2203449    | 0              | 0              | 0              | 8.551E-52 | -Inf     | down      | -                                                                                  |
| c34414.graph_c0 | 0.12401871    | 0.2482858     | 0.15936896    | 4.21386206     | 3.94714511     | 4.02687951     | 4.346E-19 | 3.42761  | up        | PREDICTED: ABC transporter G family member 8-like [Sesamum indicum]                |
| c34416.graph_c1 | 2.81888424    | 2.01550495    | 2.24242439    | 10.4876428     | 10.6144898     | 11.1052782     | 1.915E-05 | 1.09818  | up        | PREDICTED: outer envelope pore protein 21B, chloroplastic [Sesamum indicum]        |
| c34420.graph_c0 | 0.85186696    | 1.05737277    | 0.87574622    | 12.6055275     | 12.2983992     | 12.448292      | 5.202E-36 | 2.65523  | up        | PREDICTED: dnaJ protein P58IPK homolog [Sesamum indicum]                           |
| c34428.graph_c0 | 22.0660752    | 21.6567614    | 21.9314238    | 22.0828806     | 22.3992998     | 21.8533758     | 1.476E-25 | -1.07573 | down      | hypothetical protein PGTG_21261 [Puccinia graminis f. sp. tritici CRL 75-36-700-3] |
| c34430.graph_c0 | 159.04022     | 165.53313     | 147.142251    | 49.9028658     | 53.7905344     | 50.3072817     | 1.47E-233 | -2.70461 | down      | hypothetical protein PRUPE_ppa024708mg, partial [Prunus persica]                   |
| c34441.graph_c0 | 3.13104731    | 3.89245256    | 2.5958192     | 17.9113878     | 19.4863005     | 18.3892323     | 1.281E-15 | 1.44815  | up        | PREDICTED: 1-aminocyclopropane-1-carboxylate oxidase 5-like [Sesamum indicum]      |
| c34445.graph_c0 | 16.8109404    | 18.1777633    | 16.2020429    | 14.5659747     | 16.5682725     | 16.5544407     | 3.574E-32 | -1.19189 | down      | PREDICTED: glycerophosphodiester phosphodiesterase GDPDL3-like [Sesamum indicum]   |
| c34445.graph_c1 | 11.2498504    | 10.7059901    | 13.3366333    | 9.50066104     | 9.20207568     | 9.58486189     | 1.674E-11 | -1.4121  | down      | hypothetical protein MIMGU_mgv1a001172mg [Erythranthe guttata]                     |
| c34451.graph_c0 | 2.95018253    | 2.44397519    | 3.07209937    | 1.18299347     | 1.40192349     | 1.0558111      | 1.214E-13 | -2.31026 | down      | PREDICTED: putative nuclease HAKB11 isoform X2 [Sesamum indicum]                   |
| c34453.graph_c0 | 0.2034014     | 0.05090127    | 0.03267236    | 0.99785903     | 0.85091908     | 0.79916621     | 2.435E-05 | 2.13412  | up        | PREDICTED: uncharacterized protein DDB_G0290685 [Sesamum indicum]                  |
| c34455.graph_c0 | 9.49446596    | 8.52340456    | 8.1338431     | 52.192052      | 47.1739781     | 49.7831617     | 3.315E-26 | 1.42309  | up        | hypothetical protein MIMGU_mgv1a015463mg [Erythranthe guttata]                     |
| c34456.graph_c1 | 0.33938971    | 0.28310796    | 0.58150562    | 8.01666076     | 8.09204042     | 7.38018737     | 4.722E-19 | 3.18663  | up        | hypothetical protein MIMGU_mgv1a023921mg, partial [Erythranthe guttata]            |
| c34459.graph_c0 | 10.0183833    | 7.21790395    | 8.7740131     | 57.0909829     | 57.5358926     | 57.5604915     | 4.489E-42 | 1.63726  | up        | PREDICTED: uncharacterized protein LOC105175711 [Sesamum indicum]                  |
| c34467.graph_c0 | 0.74174273    | 0.78156365    | 0.40133422    | 15.3500019     | 13.9877051     | 13.8683184     | 2.806E-47 | 3.40515  | up        | hypothetical protein MIMGU_mgv1a014915mg [Erythranthe guttata]                     |
| c34469.graph_c0 | 0.08690824    | 0.26098579    | 0.11168053    | 2.71606946     | 2.39532453     | 2.78324853     | 4.121E-08 | 3.01367  | up        | -                                                                                  |
| c34477.graph_c0 | 7.66906458    | 7.29290679    | 6.1902043     | 40.0444988     | 41.0789864     | 37.8211368     | 8.54E-48  | 1.40316  | up        | hypothetical protein MIMGU_mgv1a005188mg [Erythranthe guttata]                     |
| c34486.graph_c0 | 0.52757718    | 0.28165625    | 0.40677454    | 9.38150002     | 9.94777937     | 9.80369722     | 1.631E-37 | 3.4941   | up        | hypothetical protein MIMGU_mgv1a001741mg [Erythranthe guttata]                     |
| c34487.graph_c0 | 11.5426736    | 12.0083283    | 11.6589636    | 10.6238127     | 11.1469221     | 11.8077002     | 3.865E-16 | -1.15866 | down      | PREDICTED: SNAP25 homologous protein SNAP35 [Sesamum indicum]                      |
| c34489.graph_c0 | 0             | 0             | 0             | 4.08451343     | 5.57918019     | 7.34953708     | 8.643E-10 | Inf      | up        | hypothetical protein PAXINDRAFT_10917 [Paxillus involutus ATCC 200175]             |
| c34493.graph_c0 | 59.8991401    | 62.6598233    | 54.425757     | 40.7776412     | 38.6693657     | 39.8771163     | 1.206E-87 | -1.65784 | down      | hypothetical protein MIMGU_mgv1a000078mg [Erythranthe guttata]                     |
| c34498.graph_c0 | 1.67900073    | 1.4829547     | 1.77683258    | 23.400818      | 24.1749133     | 24.8936272     | 1.334E-50 | 2.78364  | up        | PREDICTED: cytochrome P450 71D95-like [Sesamum indicum]                            |

| #ID             | 0 h-1<br>FPKM | 0 h-2<br>FPKM | 0 h-3<br>FPKM | 28 h-1<br>FPKM | 28 h-2<br>FPKM | 28 h-3<br>FPKM | FDR       | log2FC   | regulated | nr_annotation                                                                                           |
|-----------------|---------------|---------------|---------------|----------------|----------------|----------------|-----------|----------|-----------|---------------------------------------------------------------------------------------------------------|
| c34501.graph_c0 | 0             | 0             | 0             | 5.63647358     | 6.48873915     | 5.05924806     | 7.097E-18 | Inf      | up        | PREDICTED: probable galactinol--sucrose galactosyltransferase 1 [Sesamum indicum]                       |
| c34508.graph_c0 | 0.35199211    | 0.16442747    | 0.21108444    | 4.2125988      | 3.98837114     | 3.61836444     | 7.798E-20 | 2.93647  | up        | PREDICTED: cellulose synthase-like protein GZ [Sesamum indicum]                                         |
| c34509.graph_c0 | 0.42647199    | 0.25613942    | 0.21921336    | 4.15342895     | 4.03001938     | 4.35027034     | 4.516E-08 | 2.71418  | up        | hypothetical protein CARUB_v10021088mg [Capsella rubella]                                               |
| c34512.graph_c0 | 3.3126713     | 2.90876179    | 2.76325982    | 19.2293639     | 18.0487962     | 18.3535631     | 1.906E-48 | 1.54186  | up        | PREDICTED: uncharacterized protein LOC105177031 isoform X1 [Sesamum indicum]                            |
| c34518.graph_c0 | 0.04734052    | 0             | 0             | 3.09661338     | 2.05036447     | 2.97602212     | 4.186E-15 | 6.36497  | up        | PREDICTED: serine/threonine-protein kinase At5g01020 [Sesamum indicum]                                  |
| c34523.graph_c0 | 0.03950503    | 0             | 0             | 2.64150655     | 2.77389678     | 2.85831117     | 1.963E-18 | 6.65168  | up        | Serine carboxypeptidase-like 40 [Theobroma cacao]                                                       |
| c34527.graph_c1 | 18.7416056    | 17.4139342    | 15.9789814    | 12.7305845     | 14.1033496     | 14.6425457     | 1.093E-45 | -1.41825 | down      | PREDICTED: uncharacterized protein LOC105168318 [Sesamum indicum]                                       |
| c34529.graph_c0 | 0.2314741     | 0.23170589    | 0.08498668    | 4.20585108     | 5.40328462     | 4.3536612      | 8.729E-21 | 3.59036  | up        | PREDICTED: acetolactate synthase small subunit 1, chloroplastic-like isoform X2 [Sesamum indicum]       |
| c34533.graph_c0 | 0             | 0             | 0             | 5.12608014     | 4.9550782      | 6.39728399     | 2.934E-19 | Inf      | up        | PREDICTED: GDSL esterase/lipase At2g40250 [Sesamum indicum]                                             |
| c34535.graph_c0 | 1.24343366    | 1.75177012    | 1.1836011     | 18.4760619     | 18.8580844     | 17.3705375     | 7.794E-38 | 2.62125  | up        | PREDICTED: poly(U)-specific endoribonuclease-B [Sesamum indicum]                                        |
| c34540.graph_c0 | 83.7779649    | 83.9287314    | 82.160054     | 86.7211841     | 74.7060871     | 81.0653359     | 3.32E-41  | -1.13335 | down      | PREDICTED: zinc finger A20 and AN1 domain-containing stress-associated protein 5-like [Sesamum indicum] |
| c34545.graph_c0 | 0.40782283    | 0.57152368    | 0.52406848    | 22.9712543     | 22.641022      | 22.7109035     | 5.249E-91 | 4.41336  | up        | PREDICTED: LOW QUALITY PROTEIN: signal peptide peptidase-like [Sesamum indicum]                         |
| c34552.graph_c0 | 576.771256    | 604.116531    | 584.298523    | 73.2339637     | 75.7240123     | 74.4680557     | 0         | -4.07257 | down      | PREDICTED: zinc finger CCCH domain-containing protein 29 [Sesamum indicum]                              |
| c34555.graph_c0 | 30.1506338    | 27.1497523    | 28.6277625    | 17.386024      | 16.4076218     | 16.367473      | 4.011E-78 | -1.86681 | down      | PREDICTED: RNA-directed DNA methylation 4 [Sesamum indicum]                                             |
| c34558.graph_c0 | 0.26038098    | 0.14034554    | 0.18016916    | 5.45894411     | 4.5477453      | 5.70170089     | 2.313E-36 | 3.67108  | up        | PREDICTED: histidine kinase 5-like [Sesamum indicum]                                                    |
| c34564.graph_c0 | 6.7417725     | 7.26199797    | 9.04011608    | 7.32319231     | 8.70400177     | 8.17036395     | 0.0001197 | -1.02394 | down      | PREDICTED: putative nuclease HARB11 isoform X1 [Sesamum indicum]                                        |
| c34566.graph_c0 | 8.41170875    | 8.94833195    | 8.77514144    | 7.42202322     | 7.27172224     | 6.71900691     | 2.614E-25 | -1.37885 | down      | PREDICTED: chlorophyll a-b binding protein, chloroplastic [Sesamum indicum]                             |
| c34574.graph_c0 | 131.093961    | 130.672372    | 136.877674    | 57.058046      | 59.4658278     | 58.7718371     | 3.7E-153  | -2.27645 | down      | PREDICTED: heat shock 70 kDa protein 14-like [Sesamum indicum]                                          |
| c34580.graph_c0 | 109.402773    | 104.024982    | 126.257267    | 13.0422252     | 14.7583163     | 14.6714371     | 6.284E-57 | -4.09214 | down      | hypothetical protein MIMGU_mgv1a010/28mg [Erythranthe ontaria]                                          |
| c34593.graph_c0 | 0.53802107    | 0.17951994    | 0.23045946    | 114.832657     | 109.967662     | 110.890167     | 0         | 7.38717  | up        | PREDICTED: uncharacterized protein LOC105177617 [Sesamum indicum]                                       |
| c34601.graph_c0 | 3.0180559     | 4.00468483    | 4.14890188    | 3.26475257     | 3.13200082     | 2.99701287     | 5.775E-06 | -1.34417 | down      | PREDICTED: uncharacterized protein LOC105178335 [Sesamum indicum]                                       |
| c34605.graph_c0 | 9.96441786    | 9.18989268    | 10.6465808    | 54.3562969     | 55.1032631     | 59.6923812     | 4.339E-21 | 1.4136   | up        | 40S ribosomal protein s13, partial [Camellia sinensis]                                                  |
| c34608.graph_c0 | 21.5194268    | 22.7128384    | 20.5143289    | 16.1971162     | 14.4149576     | 16.094853      | 5.047E-70 | -1.56058 | down      | PREDICTED: uncharacterized protein LOC105172586 [Sesamum indicum]                                       |

| #ID             | 0 h-1<br>FPKM | 0 h-2<br>FPKM | 0 h-3<br>FPKM | 28 h-1<br>FPKM | 28 h-2<br>FPKM | 28 h-3<br>FPKM | FDR       | log2FC   | regulated | nr_annotation                                                                                                   |
|-----------------|---------------|---------------|---------------|----------------|----------------|----------------|-----------|----------|-----------|-----------------------------------------------------------------------------------------------------------------|
| c34610.graph_c0 | 1.8238076     | 1.4605071     | 1.61452476    | 12.1949023     | 10.6119094     | 12.5949104     | 2.801E-17 | 1.76442  | up        | PREDICTED: F-actin-capping protein subunit alpha [Sesamum indicum]                                              |
| c34613.graph_c0 | 8338.39758    | 8509.41383    | 8986.97563    | 6137.99925     | 6406.62925     | 6827.4128      | 5.296E-08 | -1.50646 | down      | hypothetical protein MIMGU_mgv1a024110mg [Erythranthe guttata]                                                  |
| c34619.graph_c1 | 0.34967357    | 0.70004743    | 0.53921325    | 2.54140734     | 2.98304831     | 2.2811444      | 0.0061061 | 1.20202  | up        | PREDICTED: uncharacterized protein LOC105177084 [Sesamum indicum]                                               |
| c34623.graph_c0 | 1.28444308    | 1.19389145    | 1.41476589    | 21.471094      | 25.6478259     | 24.0767237     | 1.794E-60 | 3.10064  | up        | hypothetical protein MIMGU_mgv1a008081mg [Erythranthe guttata]                                                  |
| c34627.graph_c0 | 65.4916       | 61.7546709    | 67.7846923    | 61.7877283     | 65.3180135     | 62.7376809     | 1.721E-35 | -1.1302  | down      | PREDICTED: quinone oxidoreductase-like protein 2 homolog [Sesamum indicum]                                      |
| c34632.graph_c2 | 9.63446044    | 13.5935997    | 10.3761748    | 5.26837481     | 4.63642196     | 4.29895083     | 2.305E-13 | -2.33331 | down      | PREDICTED: cyclin-D3-1 [Sesamum indicum]                                                                        |
| c34639.graph_c0 | 90.6784481    | 92.1497697    | 91.8246703    | 406.26536      | 439.674356     | 429.965153     | 5.385E-46 | 1.12518  | up        | 40S ribosomal protein S15D [Hevea brasiliensis]                                                                 |
| c34641.graph_c0 | 32.55315      | 34.5534854    | 33.0412858    | 10.7248516     | 9.92433387     | 9.2021735      | 1.83E-215 | -2.8373  | down      | PREDICTED: BTB/POZ domain-containing protein POB1-like [Sesamum indicum]                                        |
| c34644.graph_c0 | 0.45846422    | 0.4589233     | 0.58914467    | 6.14056864     | 5.32946016     | 6.87508321     | 7.914E-11 | 2.51308  | up        | PREDICTED: cytokinin riboside 5'-monophosphate phosphoribohydrolase LOG3-like isoform X1 [Nicotiana sylvestris] |
| c34647.graph_c0 | 0.05552871    | 0             | 0.14271318    | 21.6722168     | 18.9485093     | 25.2915871     | 2.834E-48 | 7.26779  | up        | PREDICTED: probable pectinesterase 15 [Sesamum indicum]                                                         |
| c34648.graph_c0 | 97.3794263    | 110.931612    | 93.1389953    | 23.7741103     | 25.4987596     | 23.6791227     | 1.508E-87 | -3.13674 | down      | PREDICTED: uncharacterized protein LOC105163464 [Sesamum indicum]                                               |
| c34652.graph_c0 | 3.1243141     | 2.16515259    | 2.05890632    | 0.40756755     | 0.21028302     | 0.4275923      | 3.88E-18  | -3.89704 | down      | PREDICTED: protein YLS9-like [Sesamum indicum]                                                                  |
| c34656.graph_c0 | 0.13392417    | 0             | 0.08604893    | 1.89803863     | 2.02134724     | 2.50188188     | 3.688E-10 | 3.78143  | up        | hypothetical protein MIMGU_mgv1a014351mg [Erythranthe guttata]                                                  |
| c34662.graph_c0 | 0             | 0             | 0             | 3.22790734     | 3.57190317     | 2.79237887     | 7.149E-25 | Inf      | up        | PREDICTED: probable GABA transporter 2 [Sesamum indicum]                                                        |
| c34664.graph_c0 | 24.9426898    | 24.1067121    | 24.3155712    | 18.4407584     | 19.8486339     | 19.6382735     | 4.592E-17 | -1.43109 | down      | PREDICTED: cyclin-dependent kinase F-4-like isoform X1 [Sesamum indicum]                                        |
| c34673.graph_c0 | 1.0042957     | 0.50265068    | 0.43018658    | 5.53519883     | 7.6888701      | 5.26118425     | 5.094E-07 | 2.1721   | up        | hypothetical protein MIMGU_mgv1a009336mg [Erythranthe guttata]                                                  |
| c34674.graph_c0 | 0.34296255    | 0.3719148     | 0.55090057    | 2.90807071     | 2.98206225     | 1.9831182      | 1.135E-05 | 1.53822  | up        | hypothetical protein MIMGU_mgv1a023462mg, partial [Erythranthe guttata]                                         |
| c34676.graph_c0 | 0.9102361     | 0.79725412    | 0.77979295    | 8.76559515     | 9.03448848     | 7.60250652     | 1.319E-18 | 2.26272  | up        | PREDICTED: uncharacterized protein LOC105168235 isoform X2 [Sesamum indicum]                                    |
| c34678.graph_c0 | 4.37685739    | 5.38266647    | 4.33884988    | 25.4485978     | 22.0750025     | 25.5123275     | 8.587E-08 | 1.28374  | up        | -                                                                                                               |
| c34681.graph_c0 | 3.538411      | 3.58220366    | 3.51358954    | 3.36074004     | 3.95795629     | 3.2431109      | 1.239E-06 | -1.101   | down      | hypothetical protein POPTR_0005s12710g [Populus trichocarpa]                                                    |
| c34682.graph_c0 | 27.0744031    | 25.633923     | 25.7902224    | 17.0964736     | 18.301461      | 19.4187476     | 2.846E-66 | -1.60771 | down      | PREDICTED: E3 ubiquitin-protein ligase At1g63170-like [Sesamum indicum]                                         |
| c34684.graph_c0 | 1.13317547    | 1.18586972    | 1.25760597    | 25.1193546     | 26.5675287     | 23.2769858     | 1.944E-60 | 3.29715  | up        | hypothetical protein CISIN_1g0023491mg, partial [Citrus sinensis]                                               |
| c34685.graph_c0 | 3.08252285    | 1.92218298    | 2.27279896    | 0.14690884     | 0.23212859     | 0.26972193     | 2.841E-19 | -4.57375 | down      | PREDICTED: uncharacterized protein LOC105169662 [Sesamum indicum]                                               |
| c34687.graph_c0 | 70.415942     | 62.1374789    | 71.1455417    | 66.9249472     | 72.160036      | 77.4663318     | 2.672E-15 | -1.00232 | down      | PREDICTED: probable fructokinase-7 [Sesamum indicum]                                                            |



| #ID             | 0 h-1<br>FPKM | 0 h-2<br>FPKM | 0 h-3<br>FPKM | 28 h-1<br>FPKM | 28 h-2<br>FPKM | 28 h-3<br>FPKM | FDR       | log2FC   | regulated | nr_annotation                                                                            |
|-----------------|---------------|---------------|---------------|----------------|----------------|----------------|-----------|----------|-----------|------------------------------------------------------------------------------------------|
| c34693.graph_c0 | 9.34410696    | 11.6851294    | 8.29174476    | 53.3180689     | 56.2233194     | 53.7487458     | 1.502E-43 | 1.38889  | up        | PREDICTED: sterol 14-demethylase-like [Sesamum indicum]                                  |
| c34696.graph_c0 | 0.08094611    | 0.32410867    | 0.72813271    | 2.64740254     | 2.07164211     | 2.25627036     | 0.0026267 | 1.51044  | up        | hypothetical protein EUGRSUZ_K01314 [Eucalyptus grandis]                                 |
| c34696.graph_c1 | 0.46945007    | 0.36549345    | 0.13405821    | 2.84328005     | 2.19069039     | 2.38196246     | 6.344E-05 | 1.8585   | up        | PREDICTED: 2,3-bisphosphoglycerate-independent phosphoglycerate mutase [Sesamum indicum] |
| c34700.graph_c0 | 0.53247906    | 0.79951838    | 0.25659625    | 5.24872426     | 5.39428182     | 5.90134527     | 2.845E-14 | 2.29894  | up        | PREDICTED: tRNA (guanine(37)-N1)-methyltransferase 2 [Sesamum indicum]                   |
| c34704.graph_c0 | 0.44075183    | 0.66178977    | 0.64729549    | 2.42540034     | 3.20222557     | 2.68859801     | 0.0004443 | 1.15407  | up        | PREDICTED: putative cyclin-A3-1 [Sesamum indicum]                                        |
| c34710.graph_c0 | 0.08067945    | 0.08076024    | 0.10367629    | 2.58004396     | 3.97080306     | 3.6364183      | 1.532E-11 | 4.17011  | up        | hypothetical protein MIMGU_mgv1a014552mg [Erythranthe outtata]                           |
| c34722.graph_c0 | 4.77646478    | 3.92307503    | 5.19364691    | 2.62588356     | 2.79287122     | 3.19589084     | 1.555E-12 | -1.78105 | down      | PREDICTED: probable protein phosphatase 2C 50 [Sesamum indicum]                          |
| c34723.graph_c0 | 1.16332272    | 1.00386863    | 0.67013465    | 4.69396195     | 5.50177252     | 5.54313457     | 3.262E-06 | 1.38795  | up        | hypothetical protein MIMGU_mgv1a001992mg [Erythranthe outtata]                           |
| c34724.graph_c0 | 4.19810803    | 4.65161557    | 4.81793946    | 21.3773147     | 25.1407383     | 19.7455329     | 3.223E-12 | 1.18445  | up        | PREDICTED: protein TRANSPORT INHIBITOR RESPONSE 1-like [Sesamum indicum]                 |
| c34730.graph_c0 | 0.9281043     | 1.15023215    | 1.07906498    | 13.6193011     | 17.6913696     | 14.6254412     | 1.354E-26 | 2.77041  | up        | PREDICTED: methylsterol monooxygenase 2-2 [Sesamum indicum]                              |
| c34731.graph_c0 | 64.4846162    | 61.3109342    | 67.6225067    | 1.93320039     | 1.46244486     | 1.83328261     | 0         | -6.29979 | down      | hypothetical protein MIMGU_mgv1a016001mg [Erythranthe outtata]                           |
| c34735.graph_c0 | 93.5654991    | 90.0888493    | 86.5524122    | 7.53577853     | 6.69523584     | 8.16604961     | 0         | -4.68152 | down      | PREDICTED: peroxisomal membrane protein 13 [Glycine max]                                 |
| c34754.graph_c0 | 1.77904446    | 1.97162868    | 2.12284667    | 11.267565      | 10.4237241     | 10.2869992     | 1.34E-07  | 1.35201  | up        | PREDICTED: uncharacterized protein LOC105178220 [Sesamum indicum]                        |
| c34755.graph_c0 | 0.26437485    | 0.26463958    | 0.39635417    | 8.45442916     | 5.95648754     | 6.29771812     | 6.015E-16 | 3.38749  | up        | PREDICTED: beta-galactosidase 8-like isoform X1 [Sesamum indicum]                        |
| c34762.graph_c0 | 1.18013965    | 1.45927935    | 0.89207422    | 7.21492785     | 6.33218231     | 5.72264187     | 8.65E-05  | 1.36076  | up        | TPA: hypothetical protein ZEAMMB73_114394 [Zea mays]                                     |
| c34763.graph_c0 | 0.11420885    | 0.17148482    | 0.25683507    | 8.79867146     | 9.04984271     | 7.75537024     | 9.348E-51 | 4.45969  | up        | PREDICTED: transmembrane 9 superfamily member 5 isoform X1 [Sesamum indicum]             |
| c34764.graph_c0 | 758.64986     | 773.011633    | 758.835563    | 9.0493111      | 9.13905629     | 9.77262193     | 0         | -7.44626 | down      | PREDICTED: proline dehydrogenase 2, mitochondrial [Sesamum indicum]                      |
| c34777.graph_c0 | 23.4607797    | 23.8180587    | 22.0371392    | 14.6276444     | 15.2705579     | 15.6227911     | 1.105E-79 | -1.69616 | down      | PREDICTED: zinc finger CCCH domain-containing protein 1 [Sesamum indicum]                |
| c34783.graph_c1 | 10.5904577    | 10.8242427    | 8.8817659     | 10.9379609     | 10.3331732     | 10.0492118     | 3.102E-20 | -1.04048 | down      | hypothetical protein MIMGU_mgv1a012299mg [Erythranthe outtata]                           |
| c34786.graph_c0 | 0.93215901    | 0.69981932    | 0.74866327    | 8.12985358     | 8.29628922     | 7.20399441     | 1.045E-21 | 2.22225  | up        | PREDICTED: uncharacterized protein LOC103931436 [Pyrus x bretschneideri]                 |
| c34789.graph_c0 | 3.96076528    | 5.83048733    | 4.19155075    | 2.96332789     | 3.44006645     | 3.10892317     | 6.044E-07 | -1.64609 | down      | -                                                                                        |
| c34792.graph_c0 | 3.93654626    | 4.30283185    | 3.0816867     | 2.40065881     | 2.25664804     | 3.94467047     | 8.342E-08 | -1.48074 | down      | unnamed protein product [Coffea canephora]                                               |
| c34794.graph_c0 | 0.93477376    | 1.06938263    | 0             | 54.4481101     | 57.5742081     | 51.7152874     | 5.369E-75 | 5.28073  | up        | hypothetical protein MIMGU_mgv1a016621mg [Erythranthe outtata]                           |
| c34794.graph_c1 | 51.78846      | 52.3829817    | 49.6258117    | 52.1483972     | 53.6770291     | 48.0183198     | 1.341E-40 | -1.09    | down      | PREDICTED: nephrocystin-3 [Sesamum indicum]                                              |
| c34805.graph_c0 | 0.13341277    | 0.22257728    | 0.34288139    | 7.75709082     | 7.29575595     | 7.35830271     | 4.25E-27  | 3.90157  | up        | PREDICTED: 1-aminocyclopropane-1-carboxylate oxidase homolog 11-like [Sesamum indicum]   |

| #ID             | 0 h-1<br>FPKM | 0 h-2<br>FPKM | 0 h-3<br>FPKM | 28 h-1<br>FPKM | 28 h-2<br>FPKM | 28 h-3<br>FPKM | FDR       | log2FC   | regulated | nr_annotation                                                                      |
|-----------------|---------------|---------------|---------------|----------------|----------------|----------------|-----------|----------|-----------|------------------------------------------------------------------------------------|
| c34808.graph_c0 | 12.6441363    | 12.8863249    | 13.7646802    | 69.0892928     | 65.9924679     | 65.0988894     | 2.357E-45 | 1.25711  | up        | PREDICTED: probable purple acid phosphatase 20 [Sesamum indicum]                   |
| c34821.graph_c0 | 133.452253    | 123.586002    | 147.946617    | 99.4993472     | 106.242354     | 107.970818     | 1.608E-17 | -1.46045 | down      | PREDICTED: protein lin-12 [Sesamum indicum]                                        |
| c34824.graph_c0 | 5.58922581    | 3.53249747    | 3.69604044    | 0              | 0              | 0              | 5.339E-40 | -Inf     | down      | V11-domain-containing protein [Auricularia delicata 1FB-10046 SSS1]                |
| c34827.graph_c0 | 1.60551838    | 1.60712607    | 1.26684937    | 7.73826683     | 8.22535342     | 8.41915006     | 1.266E-11 | 1.35715  | up        | quercetin 3-O-glucoside-6&apos;&apos;-O-malonyltransferase [Glandularia x hybrida] |
| c34832.graph_c0 | 173.156058    | 179.205022    | 177.717436    | 27.5552771     | 26.0589706     | 27.2447137     | 0         | -3.80339 | down      | -                                                                                  |
| c34836.graph_c0 | 2.67308576    | 2.67576246    | 2.95940274    | 20.4141694     | 18.1082377     | 18.5357608     | 6.334E-25 | 1.68781  | up        | hypothetical protein MIMGU_mgv1a008511mg [Erythranthe guttata]                     |
| c34840.graph_c0 | 42.3422532    | 42.3145953    | 40.4713426    | 19.4309229     | 17.6591202     | 18.9062005     | 1.92E-141 | -2.24978 | down      | PREDICTED: tubby-like F-box protein 6 [Sesamum indicum]                            |
| c34841.graph_c0 | 43.8769888    | 45.7336544    | 40.4333438    | 29.3943161     | 32.7792653     | 28.5499309     | 1.476E-77 | -1.60931 | down      | PREDICTED: uncharacterized protein LOC105169164 isoform X2 [Sesamum indicum]       |
| c34847.graph_c0 | 56.8883055    | 56.8357077    | 57.4562224    | 57.4151848     | 57.1017947     | 61.2608124     | 3.451E-38 | -1.05212 | down      | PREDICTED: DNA-directed RNA polymerase III subunit RPC5 [Sesamum indicum]          |
| c34848.graph_c0 | 6.71469516    | 7.63279775    | 5.65493389    | 139.706114     | 135.10362      | 115.978902     | 1.144E-81 | 3.19937  | up        | hypothetical protein MIMGU_mgv1a0036351mg, partial [Erythranthe guttata]           |
| c34849.graph_c0 | 0.02193226    | 0.02195422    | 0             | 3.15616731     | 2.27402151     | 2.66645649     | 1.257E-27 | 6.45729  | up        | PREDICTED: uncharacterized protein LOC105171410 [Sesamum indicum]                  |
| c34854.graph_c0 | 2.32926988    | 1.97289425    | 2.07221817    | 60.1196512     | 64.0414839     | 58.6206311     | 3.87E-137 | 3.75194  | up        | chalcone isomerase [Camellia nitidissima]                                          |
| c34856.graph_c0 | 86.1756905    | 90.9279293    | 88.2098911    | 76.0483214     | 80.6260067     | 77.2934459     | 9.737E-55 | -1.2722  | down      | PREDICTED: DEAD-box ATP-dependent RNA helicase 21 [Sesamum indicum]                |
| c34858.graph_c0 | 2.21805564    | 2.15299557    | 2.85028931    | 17.68392       | 17.3783623     | 19.8511251     | 1.281E-17 | 1.8333   | up        | PREDICTED: rac-like GTP-binding protein 5 isoform X2 [Sesamum indicum]             |
| c34867.graph_c0 | 0.04178775    | 0.209148      | 0.21479568    | 1.42744167     | 1.39853502     | 1.13999818     | 2.763E-05 | 1.98689  | up        | PREDICTED: pentatricopeptide repeat-containing protein At3g03580 [Sesamum indicum] |
| c34868.graph_c0 | 13.103545     | 11.7644326    | 11.891158     | 87.8231256     | 77.6117275     | 85.7231527     | 2.356E-52 | 1.68316  | up        | hypothetical protein VITISV_041718 [Vitis vinifera]                                |
| c34871.graph_c0 | 15.4722335    | 13.294186     | 15.6158162    | 69.9321614     | 73.5569415     | 64.1527773     | 1.71E-26  | 1.13435  | up        | PREDICTED: uncharacterized protein LOC105170170 isoform X1 [Sesamum indicum]       |
| c34875.graph_c0 | 15.0346524    | 13.2284052    | 15.2592059    | 73.705717      | 75.1586637     | 73.375917      | 2.632E-25 | 1.26108  | up        | hypothetical protein PRUPE_ppa013245mg [Prunus persica]                            |
| c34877.graph_c0 | 83.1645899    | 91.8660379    | 79.3284569    | 13.7129628     | 14.1846536     | 15.5351669     | 1.09E-166 | -3.63915 | down      | hypothetical protein MIMGU_mgv1a003671mg [Erythranthe guttata]                     |
| c34877.graph_c1 | 109.843143    | 110.3038      | 98.8369625    | 17.2283906     | 19.5403126     | 18.3518714     | 0         | -3.62209 | down      | PREDICTED: uncharacterized protein LOC105162623 [Sesamum indicum]                  |
| c34887.graph_c0 | 10.127689     | 11.0736301    | 9.61069389    | 53.9221828     | 53.6115788     | 49.3287346     | 6.368E-44 | 1.25793  | up        | PREDICTED: serine/threonine-protein kinase D6PK [Sesamum indicum]                  |
| c34889.graph_c0 | 0.69569118    | 0.69638781    | 1.78798142    | 11.6293599     | 10.7284873     | 8.87058467     | 5.838E-06 | 2.19047  | up        | -                                                                                  |
| c34898.graph_c0 | 6.39533017    | 6.66847304    | 5.33208047    | 3.37539804     | 3.27249592     | 3.31870241     | 1.542E-27 | -1.97228 | down      | PREDICTED: probable trehalose-phosphate phosphatase F [Sesamum indicum]            |

| #ID             | 0 h-1<br>FPKM | 0 h-2<br>FPKM | 0 h-3<br>FPKM | 28 h-1<br>FPKM | 28 h-2<br>FPKM | 28 h-3<br>FPKM | FDR       | log2FC   | regulated | nr_annotation                                                                                 |
|-----------------|---------------|---------------|---------------|----------------|----------------|----------------|-----------|----------|-----------|-----------------------------------------------------------------------------------------------|
| c34900.graph_c0 | 0.2563308     | 0.59870412    | 0.47579311    | 9.91528677     | 9.79363034     | 9.05358051     | 1.772E-43 | 3.33851  | up        | PREDICTED: sulfate transporter 3.1 [Sesamum indicum]                                          |
| c34902.graph_c0 | 1487.49793    | 1517.3602     | 1443.9736     | 457.868111     | 550.111836     | 547.011603     | 7.2E-172  | -2.60638 | down      | PREDICTED: desiccation-related protein PCC3-06 isoform X2 [Sesamum indicum]                   |
| c34906.graph_c0 | 0.08028496    | 0.24109606    | 0.05158468    | 2.91753226     | 2.76597099     | 2.61875075     | 8.057E-12 | 3.39243  | up        | PREDICTED: manganese-dependent ADP-ribose/CDP-alcohol diphosphatase-like [Sesamum indicum]    |
| c34910.graph_c0 | 1.54666663    | 2.22135251    | 1.98752786    | 10.0681013     | 10.2820315     | 9.01310866     | 3.262E-06 | 1.25781  | up        | PREDICTED: uncharacterized protein LOC105173417 [Sesamum indicum]                             |
| c34912.graph_c0 | 13.7709284    | 13.806392     | 13.2164927    | 62.3178935     | 63.4000791     | 62.2281372     | 1.518E-40 | 1.11384  | up        | PREDICTED: probable cytosolic oligopeptidase A [Sesamum indicum]                              |
| c34914.graph_c0 | 5.08203703    | 3.8463635     | 6.84918556    | 28.1974465     | 26.191717      | 24.4791024     | 2.037E-08 | 1.22541  | up        | PREDICTED: uncharacterized protein LOC105169952 [Sesamum indicum]                             |
| c34917.graph_c0 | 0.6557594     | 0.82052005    | 0.80054295    | 11.6171774     | 10.6183201     | 9.52813486     | 8.772E-51 | 2.70918  | up        | PREDICTED: 125 kDa kinesin-related protein-like [Sesamum indicum]                             |
| c34925.graph_c0 | 23.363432     | 23.2810042    | 20.812279     | 14.3834042     | 14.6795979     | 14.1944339     | 2.942E-86 | -1.73019 | down      | PREDICTED: probable serine/threonine-protein kinase At1g54610 [Sesamum indicum]               |
| c34926.graph_c0 | 85.0498513    | 89.1475268    | 81.4467465    | 32.7646609     | 33.0144832     | 33.4540729     | 1.17E-194 | -2.45501 | down      | PREDICTED: uncharacterized protein LOC105172852 [Sesamum indicum]                             |
| c34927.graph_c0 | 0.94727966    | 1.65939938    | 1.21729187    | 9.38050454     | 8.54741991     | 6.24993527     | 6.248E-05 | 1.56728  | up        | -                                                                                             |
| c34929.graph_c0 | 0.59966604    | 0.60026651    | 0.32446088    | 7.38623632     | 8.74022137     | 7.22504313     | 1.713E-26 | 2.85326  | up        | hypothetical protein CISIN_1g018827mg [Citrus sinensis]                                       |
| c34938.graph_c0 | 81.6703747    | 76.036959     | 88.8084703    | 24.705253      | 25.60798       | 27.0099082     | 4.219E-53 | -2.76431 | down      | unnamed protein product [Coffea canephora]                                                    |
| c34944.graph_c0 | 0.09559642    | 0             | 0             | 2.987594       | 2.60341782     | 3.17487742     | 1.105E-15 | 5.46065  | up        | PREDICTED: AP2-like ethylene-responsive transcription factor ANT isoform X2 [Sesamum indicum] |
| c34945.graph_c0 | 33.1832292    | 35.9700245    | 33.9796575    | 24.6757358     | 24.3940246     | 24.9852833     | 1.571E-76 | -1.56836 | down      | chloroplast glyceraldehyde-3-phosphate dehydrogenase, partial [Chlorokybus atmophyticus]      |
| c34946.graph_c0 | 55.2857926    | 61.0010436    | 56.0877097    | 54.3362052     | 56.3729216     | 56.4960146     | 9.391E-44 | -1.13431 | down      | PREDICTED: zinc finger CCCH domain-containing protein 49-like [Sesamum indicum]               |
| c34949.graph_c0 | 33.3360881    | 36.594438     | 36.7430945    | 15.0249077     | 15.2398204     | 16.6388456     | 2.022E-70 | -2.27655 | down      | PREDICTED: fructose-1,6-bisphosphatase, chloroplastic [Sesamum indicum]                       |
| c34953.graph_c0 | 0             | 0.84859333    | 0.15562645    | 28.0781874     | 41.6439894     | 27.6518968     | 1.384E-19 | 5.50865  | up        | -                                                                                             |
| c34956.graph_c0 | 19.5573359    | 19.1571416    | 15.1869489    | 4.43326597     | 4.85342351     | 4.38622946     | 4.803E-50 | -3.06671 | down      | PREDICTED: receptor-like serine/threonine-protein kinase At4g25390 [Sesamum indicum]          |
| c34956.graph_c1 | 15.6560784    | 16.5783861    | 20.9500311    | 3.85560868     | 5.43415124     | 4.37390918     | 9.771E-18 | -3.05565 | down      | PREDICTED: receptor-like serine/threonine-protein kinase At4g25390 [Sesamum indicum]          |
| c34957.graph_c0 | 2.76577343    | 2.16173901    | 3.01857477    | 18.9724946     | 19.5172007     | 21.4807243     | 6.87E-32  | 1.82395  | up        | PREDICTED: uncharacterized protein LOC105178545 [Sesamum indicum]                             |
| c34964.graph_c0 | 21.4608283    | 23.542867     | 16.2091185    | 17.5393492     | 18.6817642     | 18.987381      | 9.156E-08 | -1.23557 | down      | PREDICTED: uncharacterized protein LOC105159829 [Sesamum indicum]                             |
| c34966.graph_c0 | 0             | 0.36110195    | 0             | 17.5663466     | 39.0600903     | 20.538262      | 9.834E-07 | 6.65551  | up        | -                                                                                             |

| #ID             | 0 h-1<br>FPKM | 0 h-2<br>FPKM | 0 h-3<br>FPKM | 28 h-1<br>FPKM | 28 h-2<br>FPKM | 28 h-3<br>FPKM | FDR       | log2FC   | regulated | nr_annotation                                                                                 |
|-----------------|---------------|---------------|---------------|----------------|----------------|----------------|-----------|----------|-----------|-----------------------------------------------------------------------------------------------|
| c34969.graph_c0 | 6.39545902    | 5.03976457    | 4.89607884    | 4.45038775     | 4.82193945     | 3.79287917     | 1.164E-05 | -1.41051 | down      | -                                                                                             |
| c34970.graph_c0 | 4.15548272    | 4.51282111    | 4.886567      | 5.21408588     | 4.29621707     | 4.51039558     | 1.881E-07 | -1.04381 | down      | PREDICTED: uncharacterized protein LOC105172443 [Sesamum indicum]                             |
| c34973.graph_c0 | 2.30438953    | 1.99214743    | 2.82663033    | 1.1419207      | 0.6186284      | 0.62119864     | 1.45E-10  | -2.67535 | down      | -                                                                                             |
| c34978.graph_c0 | 20.9348545    | 20.5897771    | 21.8506277    | 12.9562867     | 12.4781996     | 13.8252162     | 1.527E-31 | -1.78161 | down      | PREDICTED: uncharacterized protein LOC104117218 isoform X2 [Nicotiana tomentosiformis]        |
| c34985.graph_c0 | 16.7360592    | 19.8950562    | 16.2691648    | 17.9618981     | 16.6845305     | 16.0658684     | 7.253E-15 | -1.15089 | down      | PREDICTED: uncharacterized protein LOC105167921 [Sesamum indicum]                             |
| c34990.graph_c1 | 0.4372602     | 0.21884903    | 0.09364945    | 5.31429206     | 4.38383573     | 4.23557197     | 3.331E-23 | 3.14092  | up        | PREDICTED: nuclear valosin-containing protein-like [Sesamum indicum]                          |
| c34991.graph_c0 | 0             | 0             | 0             | 0.49872937     | 0.6671198      | 1.00986146     | 9.202E-07 | Inf      | up        | --                                                                                            |
| c34993.graph_c0 | 4.21012724    | 3.77837652    | 3.17148493    | 0.10551366     | 0              | 0.17219657     | 1.556E-27 | -6.40855 | down      | -                                                                                             |
| c34994.graph_c0 | 253.151977    | 245.025957    | 266.913895    | 218.538337     | 227.287884     | 223.36122      | 6.353E-42 | -1.28461 | down      | PREDICTED: nucleoside diphosphate kinase 1-like [Sesamum indicum]                             |
| c34999.graph_c1 | 0             | 0             | 0             | 73.2947179     | 73.8293799     | 71.9975807     | 2.56E-264 | Inf      | up        | PREDICTED: probable chalcone--flavonone isomerase 3 isoform X2 [Pyrus x bretschneideri]       |
| c35002.graph_c0 | 4.25697529    | 3.98376205    | 2.74791271    | 18.3909853     | 16.3974439     | 17.4023605     | 1.939E-14 | 1.16264  | up        | PREDICTED: auxin response factor 18-like [Sesamum indicum]                                    |
| c35003.graph_c0 | 0.92955856    | 1.24065249    | 0.72998417    | 4.42891892     | 3.79556471     | 4.13461717     | 0.0048171 | 1.00469  | up        | PREDICTED: uncharacterized protein LOC105158948 [Sesamum indicum]                             |
| c35005.graph_c0 | 11.5890668    | 10.9424774    | 11.3013322    | 58.0042826     | 49.7295359     | 56.2025408     | 6.288E-24 | 1.1866   | up        | PREDICTED: GDSL esterase/lipase At4g01150-like [Sesamum indicum]                              |
| c35007.graph_c0 | 0.45799077    | 2.29224691    | 1.76560883    | 11.983142      | 13.975386      | 11.2720294     | 5.948E-06 | 1.94405  | up        | PREDICTED: LOW QUALITY PROTEIN: piriformospora indica-insensitive protein 2 [Sesamum indicum] |
| c35010.graph_c0 | 2.94554705    | 2.39217646    | 3.49947328    | 2.30237693     | 2.18824263     | 3.09824127     | 6.949E-05 | -1.31166 | down      | PREDICTED: uncharacterized aarF domain-containing protein kinase 1-like [Sesamum indicum]     |
| c35017.graph_c0 | 27.1286185    | 25.4474251    | 21.7483644    | 14.9104389     | 14.9793269     | 13.6639239     | 1.163E-42 | -1.85931 | down      | PREDICTED: beta-carotene hydroxylase 2, chloroplastic isoform X1 [Sesamum indicum]            |
| c35018.graph_c0 | 1.29171394    | 1.12343266    | 1.22451902    | 12.0352396     | 12.7704486     | 11.7420901     | 1.04E-44  | 2.23737  | up        | PREDICTED: uncharacterized protein At5g41620 [Sesamum indicum]                                |
| c35026.graph_c0 | 1.62000661    | 1.49189849    | 1.08252177    | 17.9437507     | 16.0314298     | 16.7171916     | 3.971E-24 | 2.50958  | up        | PREDICTED: hypothetical protein MIMGU_mgv1a011/60mg [Erythranthe guttata]                     |
| c35027.graph_c0 | 9.7547834     | 10.7485759    | 11.401601     | 1.52053434     | 1.07516261     | 1.74900002     | 1.23E-78  | -3.96703 | down      | PREDICTED: uncharacterized protein LOC104748542 [Camelina sativa]                             |
| c35030.graph_c0 | 6.9167932     | 8.48713982    | 6.88130563    | 0.89190225     | 0.14641893     | 0.72778496     | 1.605E-40 | -4.74446 | down      | -                                                                                             |
| c35039.graph_c0 | 4.87328522    | 4.1584358     | 2.87452794    | 27.5801789     | 28.1002973     | 25.1110661     | 1.427E-17 | 1.67766  | up        | PREDICTED: acyl carrier protein 1, chloroplastic-like [Sesamum indicum]                       |
| c35040.graph_c0 | 16.60546      | 16.7051983    | 14.7236847    | 3.9223446      | 4.35878083     | 5.07172185     | 1.494E-57 | -2.93496 | down      | PREDICTED: serine/threonine-protein kinase tricorner [Sesamum indicum]                        |
| c35042.graph_c0 | 0.82717687    | 0.50748703    | 0.61719969    | 0              | 0              | 0              | 2.589E-25 | -Inf     | down      | -                                                                                             |
| c35053.graph_c0 | 8.56749731    | 7.83773866    | 8.60350757    | 0.90721701     | 1.45209746     | 1.81705501     | 2.47E-59  | -3.67113 | down      | PREDICTED: uncharacterized protein LOC105175543 [Sesamum indicum]                             |

| #ID             | 0 h-1<br>FPKM | 0 h-2<br>FPKM | 0 h-3<br>FPKM | 28 h-1<br>FPKM | 28 h-2<br>FPKM | 28 h-3<br>FPKM | FDR       | log2FC   | regulated | nr_annotation                                                                                                                        |
|-----------------|---------------|---------------|---------------|----------------|----------------|----------------|-----------|----------|-----------|--------------------------------------------------------------------------------------------------------------------------------------|
| c35055.graph_c0 | 13.9821822    | 13.3631901    | 13.2274465    | 86.5571721     | 81.5880547     | 79.8180889     | 1.06E-65  | 1.52141  | up        | hypothetical protein MIMGU_mgv1a005945mg [Erythranthe<br>guttata]                                                                    |
| c35065.graph_c0 | 0.57527114    | 0.69101663    | 0.59139696    | 2.98944182     | 2.7180611      | 3.00228937     | 0.0003211 | 1.13912  | up        | PREDICTED: cytokinin dehydrogenase 7 [Sesamum indicum]                                                                               |
| c35070.graph_c0 | 6.84740432    | 7.77862694    | 5.79895441    | 2.3680262      | 2.60688815     | 2.58327546     | 1.026E-28 | -2.52221 | down      | PREDICTED: LOW QUALITY PROTEIN: uncharacterized protein<br>LOC105172331 [Sesamum indicum]                                            |
| c35074.graph_c0 | 0.64938514    | 0.61753363    | 1.33517699    | 4.43651216     | 4.64497066     | 3.54313306     | 0.0005066 | 1.1761   | up        | PREDICTED: protease Do-like 1, chloroplastic isoform X2<br>[Cucumis melo]                                                            |
| c35077.graph_c0 | 72.9451706    | 30.0316848    | 42.7110074    | 0              | 0              | 0              | 7.591E-16 | -Inf     | down      | hypothetical protein ASPNIDRAFT_138440 [Aspergillus niger<br>ATCC 1015]                                                              |
| c35089.graph_c0 | 10.1193128    | 10.5030728    | 12.2576026    | 3.22519847     | 3.53800689     | 3.44339239     | 1.275E-31 | -2.78076 | down      | PREDICTED: uncharacterized protein LOC105179874 [Sesamum<br>indicum]                                                                 |
| c35092.graph_c0 | 2.72584703    | 1.50269433    | 1.3199037     | 0              | 0              | 0              | 2.683E-14 | -Inf     | down      | Clan G, Crystal Structure Of The Fab Complexed With Antigen<br>Asf1p, Northeast Structural Genomics Consortium (nesg) Target<br>Data |
| c35093.graph_c0 | 18.5941435    | 19.473137     | 15.7944782    | 12.722843      | 12.1267752     | 12.2507883     | 2.122E-35 | -1.62617 | down      | PREDICTED: U-box domain-containing protein 17 isoform X1<br>[Sesamum indicum]                                                        |
| c35093.graph_c1 | 6.2623213     | 6.52620544    | 7.60638117    | 4.80081185     | 4.84133424     | 4.1718014      | 9.376E-11 | -1.65585 | down      | PREDICTED: U-box domain-containing protein 17 isoform X1<br>[Sesamum indicum]                                                        |
| c35096.graph_c0 | 3.29030414    | 2.84447176    | 3.55550751    | 0              | 0              | 0              | 1.377E-42 | -Inf     | down      | --                                                                                                                                   |
| c35097.graph_c0 | 2.01905027    | 1.19767232    | 1.44142196    | 5.27189287     | 8.04787728     | 8.29320234     | 0.0027156 | 1.12768  | up        | PREDICTED: B3 domain-containing transcription factor FUS3-like<br>isoform X2 [Sesamum indicum]                                       |
| c35103.graph_c0 | 1.17678102    | 1.09381943    | 1.26017517    | 10.0596944     | 10.0942217     | 11.0168435     | 1.336E-26 | 2.05086  | up        | hypothetical protein MIMGU_mgv1a002945mg [Erythranthe<br>guttata]                                                                    |
| c35106.graph_c0 | 6.50055684    | 6.26783579    | 6.69506285    | 35.1563386     | 37.8279747     | 36.2276191     | 3.287E-29 | 1.39713  | up        | hypothetical protein MIMGU_mgv1a011525mg [Erythranthe<br>guttata]                                                                    |
| c35108.graph_c0 | 7.24279257    | 7.67296443    | 7.91118392    | 1.93014063     | 1.84175511     | 2.25508356     | 6.634E-76 | -3.01187 | down      | PREDICTED: ethylene-responsive transcription factor RAP2-11-<br>like [Sesamum indicum]                                               |
| c35113.graph_c0 | 249.308429    | 270.460022    | 251.555118    | 39.5394393     | 37.9017721     | 41.4182612     | 0         | -3.78814 | down      | hypothetical protein MIMGU_mgv1a00268/mg [Erythranthe<br>guttata]                                                                    |
| c35115.graph_c0 | 71.904909     | 78.0509118    | 149.322577    | 32.1939693     | 24.4889089     | 34.0070755     | 0.0017778 | -2.82207 | down      | hypothetical protein EUGRSUZ_J02069 [Eucalyptus grandis]                                                                             |
| c35120.graph_c0 | 9.50994623    | 9.60761223    | 10.9759608    | 42.5586091     | 46.5739934     | 47.1823698     | 4.759E-25 | 1.08714  | up        | PREDICTED: uncharacterized protein LOC105156523 [Sesamum<br>indicum]                                                                 |
| c35121.graph_c0 | 1.86752454    | 1.38172643    | 1.90422323    | 9.64867576     | 9.12479656     | 8.72798082     | 2.349E-17 | 1.32393  | up        | PREDICTED: LETM1 and EF-hand domain-containing protein 1,<br>mitochondrial [Sesamum indicum]                                         |
| c35122.graph_c0 | 2.77493643    | 2.90397489    | 2.30973274    | 19.2513472     | 18.3754279     | 17.691261      | 1.73E-30  | 1.70341  | up        | PREDICTED: cytochrome P450 82C2 [Sesamum indicum]                                                                                    |
| c35127.graph_c0 | 0.67464013    | 0.8441446     | 1.1378578     | 5.76131357     | 5.28493544     | 4.55114701     | 6.917E-07 | 1.45584  | up        | PREDICTED: uncharacterized protein LOC105162824 isoform X1<br>[Sesamum indicum]                                                      |
| c35128.graph_c0 | 0             | 0             | 0.1012367     | 15.5168031     | 10.8049286     | 12.0542024     | 3.504E-27 | 7.43607  | up        | PREDICTED: anthocyanidin 3-O-glucosyltransferase 2-like<br>[Sesamum indicum]                                                         |
| c35134.graph_c0 | 1.17905054    | 0.56651097    | 1.09089117    | 4.28463568     | 4.3947572      | 4.39126203     | 0.0005058 | 1.11299  | up        | PREDICTED: protein-ribulosamine 3-kinase, chloroplastic<br>[Sesamum indicum]                                                         |

| #ID             | 0 h-1<br>FPKM | 0 h-2<br>FPKM | 0 h-3<br>FPKM | 28 h-1<br>FPKM | 28 h-2<br>FPKM | 28 h-3<br>FPKM | FDR       | log2FC   | regulated | nr_annotation                                                                              |
|-----------------|---------------|---------------|---------------|----------------|----------------|----------------|-----------|----------|-----------|--------------------------------------------------------------------------------------------|
| c35135.graph_c0 | 2.91442428    | 2.56852993    | 2.40178136    | 29.0099493     | 28.0018468     | 27.0347919     | 3.508E-68 | 2.32551  | up        | PREDICTED: cytochrome b561 and DOMON domain-containing protein At3g61750 [Sesamum indicum] |
| c35136.graph_c0 | 62.3449402    | 64.945192     | 60.1238094    | 44.3068724     | 42.8030295     | 42.851771      | 1.742E-54 | -1.61814 | down      | hypothetical protein MIMGU_mgv1a007434mg [Erythranthe outtata]                             |
| c35138.graph_c0 | 253.440277    | 272.417552    | 239.292681    | 187.025514     | 187.825248     | 182.540459     | 2.648E-82 | -1.54677 | down      | hypothetical protein JCGZ_08206 [Jatropha curcas]                                          |
| c35139.graph_c0 | 0.81062676    | 0.44260281    | 0.37879545    | 3.85631252     | 5.65806905     | 4.41414823     | 2.466E-06 | 2.01071  | up        | PREDICTED: thaumatin-like protein 1 [Sesamum indicum]                                      |
| c35141.graph_c1 | 0.19627074    | 0             | 0             | 11.839821      | 11.0337101     | 12.5323964     | 1.385E-38 | 6.43662  | up        | hypothetical protein MIMGU_mgv1a011475mg [Erythranthe outtata]                             |
| c35143.graph_c0 | 15.1794938    | 14.7319112    | 16.3377225    | 143.700801     | 148.962837     | 144.539831     | 1.39E-105 | 2.14907  | up        | PREDICTED: CBL-interacting serine/threonine-protein kinase 6-like [Sesamum indicum]        |
| c35152.graph_c0 | 1.1013109     | 0.91867808    | 0.7665819     | 7.80415757     | 7.66373738     | 7.27980542     | 1.443E-21 | 1.94259  | up        | PREDICTED: AP-3 complex subunit mu [Sesamum indicum]                                       |
| c35154.graph_c0 | 0.39700398    | 0.50578376    | 0.41740841    | 10.7022186     | 13.6183394     | 11.4726635     | 9.204E-40 | 3.66992  | up        | PREDICTED: transcription factor bHLH66-like [Sesamum indicum]                              |
| c35155.graph_c0 | 0.42829578    | 0             | 0.55037703    | 2.55251981     | 2.47332163     | 2.64164479     | 5.058E-05 | 1.87072  | up        | PREDICTED: SUN domain-containing protein 2-like [Sesamum indicum]                          |
| c35156.graph_c0 | 245.809332    | 239.388072    | 248.401916    | 39.3458472     | 37.4785896     | 47.1082496     | 0         | -3.65515 | down      | hypothetical protein MIMGU_mgv1a014857mg [Erythranthe outtata]                             |
| c35156.graph_c1 | 276.095132    | 240.603564    | 258.441988    | 46.5473175     | 47.6657476     | 56.2785496     | 1.91E-163 | -3.45396 | down      | Lactoylglutathione lyase / glyoxalase I family protein [1 neobroma cacao]                  |
| c35159.graph_c0 | 41.1443734    | 40.6863542    | 42.8584842    | 189.207558     | 223.568603     | 184.56034      | 1.679E-17 | 1.16839  | up        | PREDICTED: stromal cell-derived factor 2-like protein [Sesamum indicum]                    |
| c35168.graph_c0 | 10.2281164    | 6.51531893    | 7.72680515    | 36.3126743     | 33.7632263     | 34.1526745     | 1.199E-10 | 1.00281  | up        | PREDICTED: E3 ubiquitin-protein ligase KMA1H1 [Sesamum indicum]                            |
| c35189.graph_c0 | 0.19264081    | 0.23140045    | 0.14853064    | 5.3483908      | 6.16910621     | 5.25537141     | 1.073E-22 | 3.78511  | up        | PREDICTED: BTB/POZ and TAZ domain-containing protein 3 [Sesamum indicum]                   |
| c35192.graph_c0 | 8.13406141    | 6.40454043    | 6.88341356    | 62.3982115     | 65.1601089     | 58.6524341     | 1.028E-73 | 2.03041  | up        | Triosephosphate isomerase, chloroplastic [Gossypium arboreum]                              |
| c35198.graph_c0 | 18.1620311    | 16.7568554    | 17.6495459    | 8.26765293     | 8.33440842     | 10.5794835     | 5.697E-79 | -2.04076 | down      | PREDICTED: uncharacterized protein LOC105165319 [Sesamum indicum]                          |
| c35200.graph_c0 | 0.07197531    | 0.14409477    | 0.09249112    | 11.0376719     | 12.941608      | 10.0311032     | 1.278E-32 | 5.69214  | up        | PREDICTED: probable flavin-containing monooxygenase 1 [Sesamum indicum]                    |
| c35204.graph_c0 | 7.45130019    | 7.97179805    | 7.9540152     | 5.04306306     | 5.56240806     | 4.62948556     | 9.768E-26 | -1.70966 | down      | hypothetical protein MIMGU_mgv1a009915mg [Erythranthe outtata]                             |
| c35206.graph_c0 | 1.29459644    | 1.00791661    | 0.61615099    | 16.5181141     | 18.1551812     | 19.2795826     | 7.292E-44 | 3.1267   | up        | hypothetical protein MIMGU_mgv1a006155mg [Erythranthe outtata]                             |
| c35207.graph_c0 | 0.65666315    | 1.18317726    | 1.18137341    | 10.5633324     | 10.9740991     | 9.89176181     | 1.445E-20 | 2.28249  | up        | PREDICTED: nitrilase-like protein 2 [Sesamum indicum]                                      |
| c35209.graph_c0 | 7.45048521    | 7.14934109    | 6.40478856    | 40.8176682     | 39.9903655     | 39.3405189     | 5.707E-30 | 1.42726  | up        | PREDICTED: protein bem46-like isoform X2 [Sesamum indicum]                                 |
| c35210.graph_c0 | 1.1140593     | 0.84391611    | 0.96730426    | 4.39859641     | 5.78933036     | 3.96421175     | 4.398E-05 | 1.1836   | up        | PREDICTED: uncharacterized protein LOC105169721 [Sesamum indicum]                          |
| c35213.graph_c0 | 21.6541825    | 21.6291506    | 20.3301235    | 20.1475263     | 21.2538402     | 20.5641097     | 3.62E-26  | -1.12766 | down      | PREDICTED: tubby-like F-box protein 8 [Sesamum indicum]                                    |
| c35214.graph_c0 | 70.4413124    | 66.5048305    | 74.8131162    | 10.3946224     | 12.4330641     | 12.158197      | 6.3E-122  | -3.68898 | down      | hypothetical protein MIMGU_mgv1a007518mg [Erythranthe outtata]                             |
| c35218.graph_c0 | 0.08753076    | 0.05257105    | 0.1124805     | 4.74581731     | 4.75603652     | 4.33974567     | 1.991E-46 | 4.67995  | up        | PREDICTED: probable disease resistance protein At5g63020 [Vitis vinifera]                  |

| #ID             | 0 h-1<br>FPKM | 0 h-2<br>FPKM | 0 h-3<br>FPKM | 28 h-1<br>FPKM | 28 h-2<br>FPKM | 28 h-3<br>FPKM | FDR       | log2FC   | regulated | nr_annotation                                                                                |
|-----------------|---------------|---------------|---------------|----------------|----------------|----------------|-----------|----------|-----------|----------------------------------------------------------------------------------------------|
| c35223.graph_c0 | 5.76352858    | 4.9039049     | 5.18445369    | 23.8767263     | 26.6013564     | 25.2370283     | 7.007E-09 | 1.16627  | up        | PREDICTED: uncharacterized protein LOC105165107 isoform X2 [Sesamum indicum]                 |
| c35227.graph_c0 | 9.04413256    | 9.11649791    | 8.12732057    | 41.2320378     | 42.3335982     | 41.7093053     | 3.215E-19 | 1.16347  | up        | PREDICTED: V-type proton ATPase subunit C-like [Sesamum indicum]                             |
| c35231.graph_c0 | 0.09021589    | 0.04515311    | 0             | 0.91795743     | 1.09523897     | 1.20382356     | 1.104E-08 | 3.50496  | up        | PREDICTED: transcription factor TGA4 isoform X1 [Sesamum indicum]                            |
| c35234.graph_c0 | 84.8779191    | 86.3763098    | 78.860794     | 47.9117493     | 45.8310837     | 47.511355      | 1.03E-119 | -1.91372 | down      | PREDICTED: uncharacterized protein LOC105155881 [Sesamum indicum]                            |
| c35235.graph_c0 | 10.3705674    | 12.5182067    | 9.82509356    | 4.71448762     | 4.12330016     | 3.83492389     | 1.075E-30 | -2.45801 | down      | PREDICTED: uncharacterized protein LOC105164201 isoform X1 [Sesamum indicum]                 |
| c35239.graph_c0 | 3.06959217    | 2.9702437     | 2.80501153    | 42.5370068     | 42.2789562     | 40.5555068     | 4.55E-110 | 2.73557  | up        | PREDICTED: ran-binding protein 1 homolog c-like [Sesamum indicum]                            |
| c35240.graph_c0 | 17.5115622    | 19.7327554    | 17.616674     | 12.4363927     | 10.2439057     | 10.8601349     | 2.379E-26 | -1.80018 | down      | PREDICTED: disease resistance protein RPM1-like [Sesamum indicum]                            |
| c35243.graph_c0 | 0             | 0             | 0             | 3.1911553      | 3.20402121     | 2.47896675     | 1.418E-22 | Inf      | up        | PREDICTED: lycopene epsilon cyclase, chloroplastic [Sesamum indicum]                         |
| c35244.graph_c0 | 6.79262366    | 6.71750466    | 6.62546736    | 6.54279964     | 6.98163183     | 6.86772961     | 1.487E-10 | -1.07197 | down      | PREDICTED: zinc finger CCCH domain-containing protein 39-like isoform X2 [Sesamum indicum]   |
| c35245.graph_c0 | 6.36424758    | 5.67467028    | 7.42233187    | 34.166497      | 32.8145041     | 34.5085163     | 8.191E-23 | 1.28979  | up        | PREDICTED: alpha-soluble NSF attachment protein 2-like isoform X1 [Sesamum indicum]          |
| c35253.graph_c0 | 3.74979124    | 4.56200217    | 4.78156382    | 34.6116486     | 38.2167883     | 35.3249114     | 6.311E-71 | 1.95277  | up        | PREDICTED: argininosuccinate synthase, chloroplastic-like isoform X2 [Sesamum indicum]       |
| c35256.graph_c0 | 3.88442926    | 3.78322923    | 2.02364002    | 0.76302184     | 0.68893718     | 0.62261959     | 1.079E-08 | -3.3074  | down      | PREDICTED: uncharacterized protein LOC105170847 [Sesamum indicum]                            |
| c35258.graph_c0 | 143.807394    | 142.294968    | 135.535553    | 24.5117089     | 25.8807322     | 26.2634606     | 0         | -3.54918 | down      | PREDICTED: zinc finger protein 622 [Sesamum indicum]                                         |
| c35265.graph_c0 | 0.14203193    | 0.3317397     | 0.06083889    | 2.92479309     | 3.72820791     | 4.09934898     | 5.465E-12 | 3.24958  | up        | PREDICTED: auxin response factor 4 isoform X2 [Sesamum indicum]                              |
| c35265.graph_c1 | 0.23165513    | 0.40580243    | 0.14884301    | 6.81880746     | 6.99284482     | 7.2814033      | 6.841E-19 | 3.66143  | up        | PREDICTED: auxin response factor 4 isoform X2 [Sesamum indicum]                              |
| c35270.graph_c0 | 5.59192407    | 5.13106324    | 5.94543031    | 4.88669044     | 5.41698702     | 5.13242509     | 1.778E-12 | -1.20257 | down      | PREDICTED: kinesin-13A-like [Sesamum indicum]                                                |
| c35272.graph_c0 | 0.23412227    | 0.14061403    | 0.15042819    | 3.70946006     | 4.02529906     | 3.58228161     | 4.816E-22 | 3.34343  | up        | PREDICTED: interactor of constitutive active ROPs 2, chloroplastic-like [Sesamum indicum]    |
| c35275.graph_c0 | 0.14554898    | 0.43708418    | 0.35329061    | 2.06866803     | 2.31354144     | 2.11002028     | 9.22E-09  | 1.69727  | up        | PREDICTED: serine/threonine-protein kinase Nek5 [Sesamum indicum]                            |
| c35277.graph_c0 | 3.37189249    | 3.28644606    | 3.99093519    | 2.19270655     | 2.21272707     | 2.10497722     | 1.368E-07 | -1.80311 | down      | -                                                                                            |
| c35281.graph_c0 | 7.87877539    | 7.18666496    | 6.47011915    | 3.76102715     | 3.64060118     | 3.04131909     | 8.907E-30 | -2.13328 | down      | PREDICTED: uncharacterized protein LOC105158079 isoform X1 [Sesamum indicum]                 |
| c35282.graph_c0 | 0             | 0             | 0             | 2.43730793     | 3.05091575     | 2.89283399     | 1.794E-14 | Inf      | up        | lavandulyl diphosphate synthase [Lavandula x intermedia]                                     |
| c35283.graph_c0 | 67.2061862    | 68.4781565    | 65.4847995    | 53.6284415     | 52.6169934     | 53.7525446     | 4.763E-67 | -1.42043 | down      | PREDICTED: DNA-damage-repair/toleration protein DRT111, chloroplastic-like [Sesamum indicum] |
| c35285.graph_c0 | 8.86805911    | 8.59751974    | 9.93339114    | 7.3816108      | 7.49625393     | 8.31551203     | 3.584E-18 | -1.33208 | down      | -                                                                                            |
| c35288.graph_c0 | 4.17401583    | 4.35156458    | 4.13967743    | 48.6517002     | 49.3038378     | 48.7177768     | 1.31E-154 | 2.4433   | up        | PREDICTED: valine--tRNA ligase [Sesamum indicum]                                             |

| #ID             | 0 h-1<br>FPKM | 0 h-2<br>FPKM | 0 h-3<br>FPKM | 28 h-1<br>FPKM | 28 h-2<br>FPKM | 28 h-3<br>FPKM | FDR       | log2FC   | regulated | nr_annotation                                                                 |
|-----------------|---------------|---------------|---------------|----------------|----------------|----------------|-----------|----------|-----------|-------------------------------------------------------------------------------|
| c35288.graph_c1 | 148.275141    | 158.617944    | 134.860455    | 63.3549168     | 62.6605526     | 58.7044897     | 1.647E-97 | -2.34735 | down      | PREDICTED: protein TIME FOR COFFEE [Sesamum indicum]                          |
| c35290.graph_c0 | 14.9940452    | 14.9224687    | 12.8946995    | 14.2506889     | 12.7345812     | 12.6715858     | 1.515E-31 | -1.19921 | down      | PREDICTED: protein FRIGIDA [Sesamum indicum]                                  |
| c35292.graph_c0 | 586.521041    | 592.817883    | 629.515466    | 257.821975     | 252.780092     | 283.877385     | 8.488E-92 | -2.27793 | down      | hypothetical protein MIMGU_mgv1a0189502mg, partial [Erythranthe guttata]      |
| c35295.graph_c1 | 0.04021615    | 0.12076927    | 0.25839673    | 2.33830937     | 3.61555694     | 2.55200531     | 1.819E-09 | 3.23137  | up        | PREDICTED: ras-related protein RABA6a-like [Sesamum indicum]                  |
| c35299.graph_c0 | 3.58774883    | 4.33805597    | 3.97133404    | 46.0840196     | 43.8473734     | 40.6588653     | 8.531E-91 | 2.36465  | up        | PREDICTED: ammonium transporter 2 [Sesamum indicum]                           |
| c35306.graph_c0 | 7.0319596     | 7.12717225    | 7.20643917    | 6.40182177     | 6.20412945     | 6.50367368     | 4.303E-32 | -1.25165 | down      | PREDICTED: uncharacterized protein LOC105157223 [Sesamum indicum]             |
| c35309.graph_c0 | 2.80381689    | 2.71094411    | 2.57943171    | 21.3042514     | 22.3720037     | 23.733069      | 3.865E-45 | 1.96881  | up        | PREDICTED: WD-40 repeat-containing protein MSI4-like [Sesamum indicum]        |
| c35310.graph_c0 | 1.25281019    | 1.07491259    | 1.30326104    | 11.2732933     | 10.1395779     | 12.2416334     | 5.169E-15 | 2.12157  | up        | PREDICTED: uncharacterized protein LOC105164773 [Sesamum indicum]             |
| c35323.graph_c0 | 0.7032665     | 0.4399817     | 0.53658689    | 6.34120705     | 5.79762518     | 6.0476301      | 8.794E-24 | 2.34859  | up        | PREDICTED: probable thimet oligopeptidase isoform X2 [Sesamum indicum]        |
| c35324.graph_c0 | 5.71594504    | 2.83358831    | 3.56767619    | 3593.64153     | 3214.21357     | 3176.74463     | 0         | 8.60075  | up        | PREDICTED: vignain-like [Sesamum indicum]                                     |
| c35328.graph_c0 | 1.31134471    | 0.99761995    | 1.01107792    | 6.36655957     | 6.2303087      | 5.95721023     | 3.342E-10 | 1.39447  | up        | PREDICTED: uncharacterized protein LOC105175059 [Sesamum indicum]             |
| c35329.graph_c0 | 16.4931436    | 17.5116904    | 20.0304914    | 7.06755155     | 7.38233035     | 5.25820573     | 2.108E-28 | -2.54961 | down      | PREDICTED: chromo domain protein LHP1 isoform X3 [Sesamum indicum]            |
| c35338.graph_c0 | 0             | 0             | 0             | 5.07408212     | 5.32253254     | 5.6017306      | 1.375E-26 | Inf      | up        | PREDICTED: dehydrololichyl diphosphate synthase 2-like [Nicotiana sylvestris] |
| c35341.graph_c0 | 0.26674821    | 0.13350766    | 0.25708651    | 5.76766414     | 6.08289692     | 5.93239518     | 1.231E-26 | 3.66591  | up        | PREDICTED: transcription factor DHLH19-like [Sesamum indicum]                 |
| c35344.graph_c0 | 30.7258265    | 29.9497374    | 29.1998387    | 30.0727035     | 30.2131926     | 30.5486512     | 4.511E-39 | -1.07457 | down      | PREDICTED: microtubular-associated protein 1-like [Sesamum indicum]           |
| c35358.graph_c0 | 11.7751118    | 7.24052602    | 6.26875802    | 3.05645836     | 1.76620501     | 2.29452146     | 1.13E-06  | -2.91198 | down      | ubiquitin-like protein [Vanilla planifolia]                                   |
| c35359.graph_c0 | 1.1090211     | 0.44405265    | 0.78382481    | 3.18381908     | 4.148287       | 4.83419803     | 0.0012662 | 1.29392  | up        | PREDICTED: sphinganine C(4)-monooxygenase 1-like [Sesamum indicum]            |
| c35363.graph_c0 | 4.96527998    | 4.18921236    | 4.14737788    | 59.7245953     | 59.5812762     | 54.8555509     | 1.65E-127 | 2.62173  | up        | PREDICTED: F-box protein At4g00755-like [Sesamum indicum]                     |
| c35365.graph_c0 | 2.55642063    | 2.76873299    | 3.01583108    | 12.7622714     | 14.7683132     | 14.1668932     | 6.526E-12 | 1.22914  | up        | PREDICTED: probable 6-phosphogluconolactonase 1 [Solanum lycopersicum]        |
| c35372.graph_c0 | 0.912464      | 1.3986096     | 0.4763494     | 5.07742271     | 5.72586782     | 6.47681994     | 4.009E-06 | 1.5502   | up        | PREDICTED: vacuolar amino acid transporter 1 isoform X2 [Sesamum indicum]     |
| c35373.graph_c0 | 40.5765862    | 44.2626839    | 41.4219381    | 28.8338086     | 29.4918964     | 30.2986233     | 3.471E-82 | -1.60103 | down      | PREDICTED: E3 ubiquitin-protein ligase KEG [Sesamum indicum]                  |
| c35374.graph_c0 | 0.05080182    | 0             | 0             | 2.87995273     | 2.266952       | 2.28976104     | 1.266E-14 | 6.13442  | up        | PREDICTED: mitogen-activated protein kinase 19 isoform X2 [Sesamum indicum]   |
| c35375.graph_c0 | 0.5971671     | 0.52304444    | 0.38369169    | 19.693549      | 20.0510505     | 18.8292315     | 3.77E-120 | 4.19792  | up        | PREDICTED: uncharacterized protein At1g04910 [Sesamum indicum]                |



| #ID             | 0 h-1<br>FPKM | 0 h-2<br>FPKM | 0 h-3<br>FPKM | 28 h-1<br>FPKM | 28 h-2<br>FPKM | 28 h-3<br>FPKM | FDR       | log2FC   | regulated | nr_annotation                                                                                    |
|-----------------|---------------|---------------|---------------|----------------|----------------|----------------|-----------|----------|-----------|--------------------------------------------------------------------------------------------------|
| c35382.graph_c0 | 0.0278963     | 0.02792424    | 0             | 0.75017024     | 0.6956397      | 0.69485344     | 2.706E-10 | 4.19067  | up        | PREDICTED: bidirectional sugar transporter SWEET3b [Sesamum indicum]                             |
| c35387.graph_c0 | 0.90459799    | 0.9531619     | 0.79535658    | 8.5123329      | 8.68562237     | 7.90600958     | 3.823E-14 | 2.15301  | up        | PREDICTED: transcription factor bHLH121 [Sesamum indicum]                                        |
| c35389.graph_c0 | 9.09735913    | 9.86534115    | 7.79364444    | 9.6423661      | 10.1986358     | 7.58708871     | 7.126E-07 | -1.05385 | down      | PREDICTED: protein ETHYLENE INSENSITIVE 5 [Sesamum indicum]                                      |
| c35396.graph_c0 | 0.52541626    | 0.5976618     | 0.55242057    | 4.79072657     | 4.85843784     | 4.61738103     | 1.843E-14 | 1.99894  | up        | PREDICTED: ycf20-like protein [Sesamum indicum]                                                  |
| c35397.graph_c0 | 0.27248524    | 0.27275809    | 0.30013228    | 4.13056323     | 4.24040328     | 4.17850384     | 2.28E-13  | 2.8      | up        | PREDICTED: 2-amino-3-ketobutyrate coenzyme A ligase, mitochondrial [Sesamum indicum]             |
| c35400.graph_c0 | 0.35725835    | 0.22351005    | 0.05738639    | 1.72020317     | 2.10998333     | 1.82742169     | 2.07E-05  | 2.07438  | up        | PREDICTED: transcription factor bHLH68-like [Sesamum indicum]                                    |
| c35403.graph_c1 | 0.4753781     | 0.95170824    | 1.5271992     | 4.83702888     | 3.9774386      | 5.07468352     | 0.0050308 | 1.13057  | up        | PREDICTED: deSI-like protein At4g17486 [Sesamum indicum]                                         |
| c35407.graph_c0 | 0             | 0.09979194    | 0.25621664    | 14.4911313     | 14.0327325     | 13.8939576     | 3.73E-57  | 5.77978  | up        | PREDICTED: rac-like GTP-binding protein AKAC8 [Sesamum indicum]                                  |
| c35415.graph_c0 | 8.12513095    | 6.38612078    | 7.81150082    | 1.74971803     | 2.13277229     | 1.85608231     | 6.382E-38 | -3.05082 | down      | hypothetical protein MIMGU_mgv1a019839mg, partial [Erythranthe guttata]                          |
| c35430.graph_c0 | 4.42442609    | 4.19369597    | 4.07549185    | 0.28457057     | 0.3340227      | 0.37153161     | 8.807E-61 | -4.76918 | down      | unnamed protein product [Coffea canephora]                                                       |
| c35431.graph_c0 | 1.88937126    | 2.30641851    | 2.25026441    | 1.30619955     | 1.57250096     | 1.2298248      | 4.592E-08 | -1.74293 | down      | PREDICTED: cysteine-rich repeat secretory protein 3-like isoform X1 [Sesamum indicum]            |
| c35440.graph_c0 | 1.77447552    | 1.42567626    | 1.23014636    | 0              | 0              | 0              | 1.207E-55 | -Inf     | down      | predicted protein [Thalassiosira pseudonana CCMP1335]                                            |
| c35441.graph_c0 | 5.69298877    | 4.73280987    | 4.3398315     | 1.68310431     | 2.40616853     | 1.48784932     | 7.894E-15 | -2.49388 | down      | -                                                                                                |
| c35451.graph_c0 | 9.57140232    | 9.08385997    | 8.99265469    | 44.4293388     | 44.4411306     | 41.2074384     | 6.772E-25 | 1.14391  | up        | hypothetical protein MIMGU_mgv1a00562/mg [Erythranthe guttata]                                   |
| c35463.graph_c0 | 131.951969    | 132.147419    | 134.691624    | 37.376927      | 40.7630986     | 39.4652264     | 0         | -2.85253 | down      | PREDICTED: BTB/POZ and TAZ domain-containing protein 1 [Sesamum indicum]                         |
| c35467.graph_c0 | 18.3740197    | 20.9125335    | 19.6382803    | 10.3045102     | 11.1300266     | 11.6826938     | 2.499E-56 | -1.92197 | down      | PREDICTED: common plant regulatory factor 1-like isoform X2 [Sesamum indicum]                    |
| c35468.graph_c0 | 1.35796447    | 1.50829131    | 1.60161032    | 18.9820945     | 19.665963      | 17.2102601     | 1.385E-86 | 2.55109  | up        | PREDICTED: alpha,alpha-trehalose-phosphate synthase [UDP-forming] 5 isoform X1 [Sesamum indicum] |
| c35474.graph_c1 | 4.96277249    | 5.30535549    | 4.76754033    | 4.83256499     | 4.45820859     | 5.94357523     | 2.819E-07 | -1.06959 | down      | hypothetical protein MIMGU_mgv1a015518mg [Erythranthe guttata]                                   |
| c35476.graph_c0 | 2.30957079    | 2.03445746    | 2.07752293    | 1.91358432     | 1.3943546      | 1.72583436     | 2.953E-06 | -1.44027 | down      | hypothetical protein MIMGU_mgv1a012516mg [Erythranthe guttata]                                   |
| c35479.graph_c0 | 1.70482551    | 1.80691691    | 1.54642467    | 13.5203023     | 15.5638232     | 15.9390743     | 8.962E-22 | 2.06519  | up        | PREDICTED: glycine-rich RNA-binding protein 8-like [Sesamum indicum]                             |
| c35484.graph_c0 | 15.6273844    | 16.5143954    | 14.3821965    | 119.242812     | 125.999153     | 126.112924     | 3.4E-105  | 1.90753  | up        | PREDICTED: 60S ribosomal protein L4-1 [Sesamum indicum]                                          |
| c35495.graph_c0 | 32.7029237    | 34.5576378    | 37.8834462    | 10.2576681     | 9.45752041     | 13.1303777     | 5.345E-48 | -2.76947 | down      | PREDICTED: CBL-interacting protein kinase 18-like [Sesamum indicum]                              |
| c35497.graph_c0 | 1.18330517    | 1.63572438    | 1.7378217     | 1.43336563     | 1.55303373     | 1.16961465     | 0.0011104 | -1.22859 | down      | PREDICTED: probable protein phosphatase 2C 4 [Sesamum indicum]                                   |
| c35500.graph_c0 | 7.25863693    | 5.95967518    | 6.39309872    | 143.50642      | 147.930333     | 151.586787     | 9.53E-192 | 3.40842  | up        | PREDICTED: nascent polypeptide-associated complex subunit alpha-like protein 2 [Vitis vinifera]  |
| c35504.graph_c0 | 58.6007934    | 60.1087073    | 63.167052     | 356.910225     | 397.176687     | 379.55106      | 2.285E-78 | 1.54838  | up        | PREDICTED: 40S ribosomal protein S8 [Sesamum indicum]                                            |

| #ID             | 0 h-1<br>FPKM | 0 h-2<br>FPKM | 0 h-3<br>FPKM | 28 h-1<br>FPKM | 28 h-2<br>FPKM | 28 h-3<br>FPKM | FDR       | log2FC   | regulated | nr_annotation                                                                                        |
|-----------------|---------------|---------------|---------------|----------------|----------------|----------------|-----------|----------|-----------|------------------------------------------------------------------------------------------------------|
| c35508.graph_c0 | 3.01749558    | 2.41641372    | 2.4898282     | 28.025489      | 28.8478371     | 26.8244184     | 1.78E-67  | 2.31209  | up        | PREDICTED: acyl-CoA-binding domain-containing protein 4 [Sesamum indicum]                            |
| c35510.graph_c0 | 0             | 0.32190479    | 0.2066233     | 10.9850518     | 14.5611608     | 10.8708855     | 2.675E-17 | 5.00465  | up        | PREDICTED: beta-glucosidase 24-like [Sesamum indicum]                                                |
| c35510.graph_c1 | 0.24092456    | 0.48233162    | 0.4127968     | 26.090285      | 26.5610042     | 21.2418321     | 3.545E-55 | 4.92759  | up        | PREDICTED: NADPH--cytochrome P450 reductase-like [Sesamum indicum]                                   |
| c35517.graph_c0 | 10.8808782    | 10.0247669    | 10.6432884    | 7.06226191     | 6.85613453     | 7.28770923     | 1.989E-44 | -1.66335 | down      | PREDICTED: putative lysine-specific demethylase JMJ16 isoform X1 [Sesamum indicum]                   |
| c35521.graph_c0 | 2.59215621    | 2.41943079    | 3.15096805    | 12.3985211     | 11.6084693     | 12.7969788     | 1.544E-10 | 1.07965  | up        | PREDICTED: rhodanese-like domain-containing protein 8, chloroplastic [Sesamum indicum]               |
| c35522.graph_c0 | 2.78382228    | 1.42728798    | 1.48327979    | 0              | 0              | 0              | 6.009E-13 | -Inf     | down      | hypothetical protein SNOG_05978 [Phaeosphaeria nodorum SN15]                                         |
| c35526.graph_c1 | 0             | 0.0675518     | 0             | 2.86925796     | 2.05925124     | 2.08114761     | 4.525E-17 | 5.61507  | up        | PREDICTED: L-ascorbate oxidase homolog [Sesamum indicum]                                             |
| c35528.graph_c0 | 16.2079293    | 11.9416399    | 13.6385288    | 12.3777905     | 12.0398285     | 13.1741426     | 8.209E-10 | -1.24126 | down      | PREDICTED: protein N-terminal glutamine amidohydrolase [Sesamum indicum]                             |
| c35533.graph_c0 | 55.4728921    | 48.070331     | 53.5441039    | 32.9683302     | 35.9303154     | 38.5797955     | 9.966E-40 | -1.63751 | down      | hypothetical protein MIMGU_mgv1a026579mg [Erythranthe ontifata]                                      |
| c35535.graph_c0 | 1.17143599    | 1.60690864    | 0.72479412    | 0.81985986     | 0.59789955     | 0.90057551     | 0.0025713 | -1.67842 | down      | PREDICTED: peregrin [Sesamum indicum]                                                                |
| c35537.graph_c0 | 2.37791456    | 1.45139981    | 3.57742169    | 11.6762567     | 11.5321199     | 12.2106288     | 2.078E-05 | 1.15973  | up        | hypothetical protein MIMGU_mgv1a013158mg [Erythranthe ontifata]                                      |
| c35540.graph_c0 | 41.3697896    | 37.3264354    | 44.5727484    | 9.66449721     | 11.4963364     | 12.2673457     | 1.805E-49 | -2.97398 | down      | PREDICTED: ras-related protein RABC2a-like [Sesamum indicum]                                         |
| c35552.graph_c0 | 0             | 0             | 0             | 2.04682507     | 1.80958923     | 1.53100983     | 3.62E-14  | Inf      | up        | PREDICTED: probable glycosyltransferase At3g07620 [Sesamum indicum]                                  |
| c35552.graph_c1 | 0.43638088    | 0.10920446    | 0.42057504    | 4.51951734     | 3.50797053     | 5.30538453     | 8.707E-08 | 2.69529  | up        | hypothetical protein MIMGU_mgv1a009597mg [Erythranthe ontifata]                                      |
| c35557.graph_c0 | 1.41596184    | 1.0838786     | 0.21406671    | 9.44362431     | 9.18260789     | 9.237225       | 4.194E-10 | 2.28617  | up        | --                                                                                                   |
| c35559.graph_c0 | 4.54759744    | 3.37962739    | 2.74483523    | 18.028187      | 18.6742109     | 18.5111571     | 6.961E-10 | 1.28647  | up        | PREDICTED: AP-2 complex subunit sigma-like [Camelina sativa]                                         |
| c35583.graph_c0 | 628.040481    | 704.20716     | 655.342701    | 76.9606386     | 90.0551628     | 109.898692     | 1.87E-186 | -3.93303 | down      | PREDICTED: probable xyloglucan endotransglucosylase/hydrolase protein 23 [Nicotiana tomentosiformis] |
| c35583.graph_c1 | 355.409371    | 376.017552    | 381.101463    | 46.6868657     | 53.9923487     | 64.3934098     | 5.56E-219 | -3.84288 | down      | PREDICTED: probable xyloglucan endotransglucosylase/hydrolase protein 25 [Prunus mume]               |
| c35586.graph_c0 | 1.21413932    | 1.51386337    | 1.39598372    | 6.71884887     | 5.99660014     | 5.76044187     | 1.504E-08 | 1.0715   | up        | PREDICTED: probable galactinol--sucrose galactosyltransferase 6 [Sesamum indicum]                    |
| c35595.graph_c0 | 1584.50283    | 1516.13061    | 1578.39165    | 628.63883      | 666.759956     | 702.638324     | 1.77E-100 | -2.31791 | down      | PREDICTED: cysteine proteinase 15A [Nicotiana tomentosiformis]                                       |
| c35599.graph_c0 | 3.14639204    | 2.04720274    | 3.23459067    | 0.91471184     | 2.16798495     | 2.79899022     | 0.0003267 | -1.60862 | down      | -                                                                                                    |
| c35599.graph_c1 | 18.4584802    | 18.9017213    | 20.7208128    | 18.5041614     | 18.6567338     | 17.8359827     | 2.608E-22 | -1.17097 | down      | PREDICTED: uncharacterized protein LOC105161992 [Sesamum indicum]                                    |
| c35601.graph_c0 | 7.37851039    | 7.21108468    | 7.91074908    | 44.2974658     | 44.1078421     | 42.5418958     | 2.182E-57 | 1.44922  | up        | PREDICTED: protein transport protein SEC24 [Sesamum indicum]                                         |

| #ID             | 0 h-1<br>FPKM | 0 h-2<br>FPKM | 0 h-3<br>FPKM | 28 h-1<br>FPKM | 28 h-2<br>FPKM | 28 h-3<br>FPKM | FDR       | log2FC   | regulated | nr_annotation                                                                                     |
|-----------------|---------------|---------------|---------------|----------------|----------------|----------------|-----------|----------|-----------|---------------------------------------------------------------------------------------------------|
| c35616.graph_c0 | 32.1422369    | 29.4444715    | 29.6638156    | 134.855484     | 135.759678     | 126.965911     | 3.363E-26 | 1.03332  | up        | PREDICTED: uncharacterized protein LOC105173072 [Sesamum indicum]                                 |
| c35618.graph_c1 | 9.14005645    | 8.25857789    | 10.2901602    | 54.3192645     | 53.5038577     | 53.726153      | 3.305E-28 | 1.4521   | up        | PREDICTED: uncharacterized protein LOC105168327 [Sesamum indicum]                                 |
| c35623.graph_c0 | 1.08079519    | 1.08187745    | 1.14195535    | 6.17939031     | 5.59517112     | 5.38418505     | 2.13E-09  | 1.28476  | up        | PREDICTED: pentatricopeptide repeat-containing protein At1g51965, mitochondrial [Sesamum indicum] |
| c35626.graph_c0 | 1.88259169    | 1.51288984    | 1.9592152     | 0.87684062     | 1.07010658     | 1.16366185     | 7.438E-15 | -1.87463 | down      | PREDICTED: phosphatidylinositol/phosphatidylcholine transfer protein SFH2 [Sesamum indicum]       |
| c35628.graph_c0 | 2.23381846    | 1.63404041    | 1.43527258    | 22.0737145     | 20.9453429     | 19.336755      | 3.886E-42 | 2.46966  | up        | PREDICTED: uncharacterized protein At4g15545 [Sesamum indicum]                                    |
| c35629.graph_c0 | 7.59210431    | 6.84393472    | 6.73767584    | 33.6561271     | 33.388624      | 32.5378328     | 1.462E-21 | 1.14424  | up        | PREDICTED: KH domain-containing protein At1g09660/At1g09670 [Sesamum indicum]                     |
| c35636.graph_c0 | 5.90986294    | 5.98620673    | 5.67320349    | 28.4049259     | 29.4444007     | 27.3402474     | 2.847E-36 | 1.18735  | up        | PREDICTED: extra-large guanine nucleotide-binding protein 3 [Sesamum indicum]                     |
| c35639.graph_c0 | 1.91413673    | 1.91605345    | 2.00663121    | 1.79389457     | 1.78499601     | 1.64304454     | 0.0001473 | -1.25218 | down      | hypothetical protein EUTSA_v10027555mg, partial [Eutrema salsugineum]                             |
| c35645.graph_c0 | 0.03630618    | 0             | 0             | 1.02909782     | 0.92917885     | 0.99045716     | 3.97E-12  | 5.28499  | up        | hypothetical protein MIMGU_mgv1a02155/mg [Erythranthe diffusa]                                    |
| c35649.graph_c0 | 0.21863511    | 0.25532972    | 0.18730318    | 2.51596006     | 2.70209887     | 1.88011841     | 9.365E-08 | 2.33444  | up        | PREDICTED: pto-interacting protein 1-like [Sesamum indicum]                                       |
| c35651.graph_c0 | 2.72863175    | 2.84061862    | 1.89345591    | 1.42787076     | 1.03854914     | 1.52114309     | 3.965E-10 | -1.9888  | down      | PREDICTED: uncharacterized protein LOC105171337 [Sesamum indicum]                                 |
| c35653.graph_c0 | 16.875585     | 14.2025975    | 14.0888604    | 114.760506     | 121.745833     | 117.867313     | 7.515E-60 | 1.88327  | up        | PREDICTED: macrophage migration inhibitory factor homolog isoform X1 [Eucalyptus grandis]         |
| c35660.graph_c0 | 1.6693277     | 1.0152907     | 1.00469153    | 0              | 0              | 0              | 1.796E-23 | -Inf     | down      | hypothetical protein THAOC_20916 [Thalassiosira oceanica]                                         |
| c35679.graph_c0 | 1.44421421    | 1.22325109    | 1.4989739     | 19.2569774     | 20.8136624     | 20.3584181     | 5.958E-38 | 2.76682  | up        | PREDICTED: serine/threonine-protein kinase At5g01020 [Sesamum indicum]                            |
| c35683.graph_c0 | 3.46573409    | 2.36201157    | 2.17942398    | 2.78684105     | 2.37108755     | 2.18657648     | 0.0001791 | -1.21055 | down      | -                                                                                                 |
| c35685.graph_c0 | 6.61998551    | 6.77278975    | 5.75469706    | 30.5309558     | 39.3215214     | 45.3226266     | 3.459E-07 | 1.50103  | up        | hypothetical protein POPTR_0014s02030g [Populus trichocarpa]                                      |
| c35685.graph_c2 | 0.38816723    | 0.51807457    | 0.49881026    | 3.10329479     | 3.82088759     | 3.76002719     | 0.0001061 | 1.83411  | up        | -                                                                                                 |
| c35687.graph_c0 | 246.167261    | 242.351856    | 259.752647    | 63.7470108     | 65.6123263     | 66.1274097     | 6.38E-160 | -3.02773 | down      | PREDICTED: ubiquitin carboxyl-terminal hydrolase 19-like [Sesamum indicum]                        |
| c35689.graph_c0 | 33.5426055    | 31.0305894    | 30.5282525    | 25.9227046     | 25.7505738     | 25.6581672     | 5.891E-56 | -1.38795 | down      | hypothetical protein MIMGU_mgv1a010259mg [Erythranthe diffusa]                                    |
| c35690.graph_c0 | 4.75461583    | 4.66124538    | 4.93408712    | 1.62687612     | 1.30808632     | 1.67635438     | 3.117E-76 | -2.72806 | down      | PREDICTED: UDP-glycosyltransferase 73C3-like [Sesamum indicum]                                    |
| c35693.graph_c0 | 130.313951    | 138.415702    | 144.453854    | 64.3373701     | 60.3388898     | 62.6763541     | 1.771E-66 | -2.23269 | down      | hypothetical protein MIMGU_mgv1a013946mg [Erythranthe diffusa]                                    |
| c35694.graph_c0 | 39.109906     | 40.0161576    | 42.2989047    | 178.387208     | 184.685525     | 182.524645     | 4.803E-42 | 1.07623  | up        | PREDICTED: splicing factor U2af small subunit B-like [Sesamum indicum]                            |

| #ID             | 0 h-1<br>FPKM | 0 h-2<br>FPKM | 0 h-3<br>FPKM | 28 h-1<br>FPKM | 28 h-2<br>FPKM | 28 h-3<br>FPKM | FDR       | log2FC   | regulated | nr_annotation                                                                                      |
|-----------------|---------------|---------------|---------------|----------------|----------------|----------------|-----------|----------|-----------|----------------------------------------------------------------------------------------------------|
| c35699.graph_c0 | 11.9143396    | 14.201954     | 12.1184776    | 11.1071245     | 11.2995455     | 12.9083689     | 1.481E-16 | -1.20416 | down      | PREDICTED: trihelix transcription factor GT-4-like isoform X2 [Sesamum indicum]                    |
| c35713.graph_c0 | 28.3624123    | 28.9570848    | 28.05381      | 26.986485      | 27.3192411     | 27.3124416     | 3.574E-41 | -1.15522 | down      | PREDICTED: uncharacterized protein LOC105178130 [Sesamum indicum]                                  |
| c35716.graph_c0 | 4.26491438    | 3.57420144    | 3.44129683    | 1.2975552      | 1.30174521     | 0.99997253     | 5.475E-14 | -2.7374  | down      | PREDICTED: wound-induced protein 1 [Sesamum indicum]                                               |
| c35717.graph_c0 | 16.466383     | 17.9401986    | 17.0311826    | 17.5136667     | 18.0863463     | 17.5064861     | 1.271E-18 | -1.04479 | down      | PREDICTED: vacuolar protein-sorting-associated protein 37 homolog 1 isoform X2 [Sesamum indicum]   |
| c35719.graph_c1 | 9.51224092    | 8.90185935    | 8.84938156    | 6.19329168     | 5.60821742     | 6.56683989     | 1.015E-42 | -1.65891 | down      | PREDICTED: solute carrier family 25 member 44-like [Sesamum indicum]                               |
| c35725.graph_c0 | 1.12722524    | 1.16154087    | 0.85207592    | 5.66253794     | 6.41812149     | 5.56436373     | 5.676E-08 | 1.4026   | up        | PREDICTED: LOW QUALITY PROTEIN: ankyrin repeat-containing protein At3g12360-like [Sesamum indicum] |
| c35730.graph_c0 | 17.6672111    | 17.7454669    | 17.3383002    | 15.0831046     | 13.9362649     | 13.4918119     | 5.606E-27 | -1.40191 | down      | PREDICTED: 26S proteasome non-ATPase regulatory subunit 9 [Sesamum indicum]                        |
| c35732.graph_c0 | 1.71253766    | 1.61341412    | 1.52105733    | 0.58572353     | 0.61148678     | 0.56756042     | 6.49E-18  | -2.54705 | down      | PREDICTED: zinc finger BED domain-containing protein DAYSLEEPER-like isoform X1 [Sesamum indicum]  |
| c35735.graph_c0 | 14.4521098    | 15.1856804    | 16.0736077    | 12.438604      | 12.839268      | 12.6809838     | 1.384E-29 | -1.35996 | down      | PREDICTED: uncharacterized protein LOC105166332 [Sesamum indicum]                                  |
| c35736.graph_c1 | 0.60692411    | 0.70878716    | 0.12998692    | 7.27829759     | 6.3392903      | 8.24865472     | 2.642E-16 | 2.84333  | up        | PREDICTED: RING-H2 finger protein A1L5 / [Solanum lycopersicum]                                    |
| c35742.graph_c0 | 0.04162066    | 0             | 0             | 0.78649105     | 1.17444193     | 1.01202236     | 1.107E-10 | 5.09936  | up        | PREDICTED: thiol-disulfide oxidoreductase LTO1-like [Sesamum indicum]                              |
| c35746.graph_c0 | 0.53269439    | 0.5332278     | 0.47917337    | 6.23326334     | 7.0612831      | 6.28678326     | 2.606E-13 | 2.57418  | up        | PREDICTED: probable pectinesterase/pectinesterase inhibitor 61 [Sesamum indicum]                   |
| c35749.graph_c0 | 1.55297444    | 1.34011164    | 1.10103925    | 0.15568178     | 0.14056605     | 0.06351753     | 1.508E-21 | -4.5625  | down      | PREDICTED: oligopeptide transporter / isoform X1 [Malus domestical]                                |
| c35752.graph_c0 | 0.08353479    | 0             | 0             | 8.10513229     | 7.07149449     | 8.3724268      | 1.894E-41 | 7.08079  | up        | PREDICTED: probable galactinol--sucrose galactosyltransferase 6 [Sesamum indicum]                  |
| c35755.graph_c0 | 1.11070489    | 1.76582714    | 1.8470938     | 7.45522728     | 11.2761187     | 7.36208198     | 0.0005092 | 1.36864  | up        | PREDICTED: dynein light chain 1, cytoplasmic-like [Nicotiana tomentosiformis]                      |
| c35760.graph_c0 | 32.9544458    | 37.5759238    | 31.8404267    | 7.9236726      | 7.56082966     | 10.5066847     | 1.824E-84 | -3.06585 | down      | Ubiquitin-like protein [Medicago truncatula]                                                       |
| c35764.graph_c0 | 1.83027332    | 3.09167898    | 1.76398026    | 410.626022     | 412.193881     | 379.706963     | 0         | 6.40186  | up        | PREDICTED: pistia-specific extensin-like protein [Sesamum indicum]                                 |
| c35766.graph_c0 | 19.9220317    | 20.9637428    | 20.8287563    | 118.366326     | 120.085658     | 118.420602     | 1.026E-74 | 1.44069  | up        | PREDICTED: staphylococcal nuclease domain-containing protein 1 [Sesamum indicum]                   |
| c35772.graph_c0 | 176.962155    | 175.50605     | 158.591457    | 13.7455339     | 14.4064109     | 15.1749176     | 0         | -4.64896 | down      | -                                                                                                  |
| c35783.graph_c0 | 14.938512     | 8.19708525    | 8.41843347    | 0              | 0              | 0              | 2.782E-24 | -Inf     | down      | uncharacterized protein LOC100273336 [Zea mays]                                                    |
| c35784.graph_c0 | 2.61913173    | 1.74783626    | 2.46817118    | 0              | 0              | 0              | 2.584E-34 | -Inf     | down      | NAD(P)-binding protein [Auricularia delicata TFB-10046 SS5]                                        |
| c35787.graph_c0 | 4.00547614    | 3.35873258    | 3.66501873    | 0.36579983     | 0.38533011     | 0.47260865     | 3.361E-85 | -4.26069 | down      | PREDICTED: probable LRR receptor-like serine/threonine-protein kinase At4g36180 [Sesamum indicum]  |

| #ID             | 0 h-1<br>FPKM | 0 h-2<br>FPKM | 0 h-3<br>FPKM | 28 h-1<br>FPKM | 28 h-2<br>FPKM | 28 h-3<br>FPKM | FDR       | log2FC   | regulated | nr_annotation                                                                               |
|-----------------|---------------|---------------|---------------|----------------|----------------|----------------|-----------|----------|-----------|---------------------------------------------------------------------------------------------|
| c35789.graph_c0 | 2.0794413     | 2.04974456    | 1.87663454    | 17.2129643     | 17.2083623     | 15.8719478     | 2.469E-62 | 1.97631  | up        | PREDICTED: pentatricopeptide repeat-containing protein At4g01570 [Sesamum indicum]          |
| c35793.graph_c0 | 1.47073022    | 1.63322513    | 1.62417283    | 9.8874938      | 10.9180666     | 9.67628561     | 5.078E-22 | 1.59662  | up        | PREDICTED: serine/threonine-protein kinase D6PKL1 [Sesamum indicum]                         |
| c35799.graph_c0 | 66.5904956    | 72.6654824    | 69.2457515    | 28.3460411     | 28.0313238     | 29.1002358     | 2.16E-140 | -2.37708 | down      | PREDICTED: GTP cyclohydrolase 1 [Sesamum indicum]                                           |
| c35804.graph_c0 | 2.2056856     | 2.48929255    | 3.33458038    | 16.439424      | 15.5811643     | 15.5946021     | 3.357E-27 | 1.47208  | up        | hypothetical protein MIMGU_mgv1a00159/mg [Erythranthe diffusa]                              |
| c35812.graph_c0 | 1294.50295    | 1071.59934    | 1135.28011    | 926.428892     | 865.54204      | 945.94862      | 1.204E-28 | -1.44381 | down      | -                                                                                           |
| c35813.graph_c0 | 6.53720099    | 6.71371446    | 7.74597284    | 816.311694     | 699.279622     | 688.307971     | 2.48E-173 | 5.62064  | up        | PREDICTED: cysteine proteinase COT44 [Sesamum indicum]                                      |
| c35814.graph_c0 | 300.204405    | 299.751082    | 328.509247    | 260.200227     | 253.512202     | 248.986135     | 8.756E-33 | -1.37564 | down      | PREDICTED: thioredoxin H-type-like [Nelumbo nucifera]                                       |
| c35816.graph_c0 | 4.31965006    | 4.22003382    | 4.93711755    | 28.9648764     | 32.3670392     | 31.4559938     | 1.21E-59  | 1.69103  | up        | PREDICTED: oligopeptide transporter 7-like isoform X2 [Sesamum indicum]                     |
| c35818.graph_c0 | 10.8106673    | 8.85591209    | 9.78827114    | 3.12089623     | 3.46924516     | 4.9396863      | 2.94E-41  | -2.4409  | down      | PREDICTED: probable galactinol--sucrose galactosyltransferase 1 [Sesamum indicum]           |
| c35827.graph_c1 | 11.8323388    | 12.3950795    | 12.3761822    | 10.3329436     | 12.8809765     | 12.2394159     | 1.39E-09  | -1.13701 | down      | PREDICTED: ethylene-responsive transcription factor ERF060 [Sesamum indicum]                |
| c35828.graph_c0 | 0.04272613    | 0.06415337    | 0.08235716    | 0.85396044     | 0.60281795     | 0.98822419     | 3.366E-07 | 2.59544  | up        | PREDICTED: K(+) efflux antiporter 5, chloroplastic [Sesamum indicum]                        |
| c35844.graph_c0 | 0.31564105    | 0.34755283    | 0.24336675    | 1.97289242     | 2.60986566     | 1.85321566     | 1.523E-05 | 1.7394   | up        | PREDICTED: uncharacterized protein LOC105173814 [Sesamum indicum]                           |
| c35849.graph_c0 | 0.25361014    | 0.2855971     | 0.04073738    | 48.6841501     | 46.2663813     | 46.2309094     | 0         | 6.8521   | up        | PREDICTED: cytochrome P450 78A5 [Sesamum indicum]                                           |
| c35854.graph_c0 | 1.52062746    | 1.28995775    | 1.39103038    | 6.81841885     | 6.10565343     | 6.5420201      | 4.072E-08 | 1.12231  | up        | PREDICTED: putative pentatricopeptide repeat-containing protein At1g16830 [Sesamum indicum] |
| c35855.graph_c0 | 4.04441503    | 4.18969042    | 2.77991556    | 244.863649     | 221.829583     | 216.791984     | 1.13E-260 | 4.86943  | up        | PREDICTED: cysteine proteinase 3-like [Sesamum indicum]                                     |
| c35856.graph_c0 | 12.7984981    | 13.56216      | 13.6753587    | 3.85022649     | 3.96862624     | 3.3641784      | 7.909E-83 | -2.93198 | down      | PREDICTED: probable methyltransferase PM119 [Sesamum indicum]                               |
| c35864.graph_c0 | 0.28652612    | 0.38241737    | 0.42956364    | 3.36663609     | 3.32179602     | 2.97371642     | 5.753E-07 | 2.04126  | up        | PREDICTED: ras-related protein KABA3a [Beta vulgaris subsp. vulgaris]                       |
| c35878.graph_c0 | 58.6301038    | 57.9062954    | 62.1822678    | 275.728187     | 272.297995     | 276.870373     | 1.859E-43 | 1.1152   | up        | PREDICTED: 60S ribosomal protein L11-like [Sesamum indicum]                                 |
| c35883.graph_c0 | 0.03389161    | 0             | 0             | 9.7050974      | 10.3196344     | 9.48705652     | 4.011E-65 | 8.70695  | up        | PREDICTED: uncharacterized protein LOC105165376 isoform X1 [Sesamum indicum]                |
| c35884.graph_c0 | 8.8338195     | 8.07630092    | 6.50836981    | 0.72764183     | 0.73428557     | 0.94301438     | 2.055E-57 | -4.36915 | down      | -                                                                                           |
| c35887.graph_c0 | 0             | 0.10880836    | 0.20952478    | 3.35759277     | 2.46093895     | 2.15958205     | 1.366E-09 | 3.53261  | up        | PREDICTED: putative UDP-rhamnose:rhamnosyltransferase 1 [Sesamum indicum]                   |
| c35890.graph_c0 | 7.98813074    | 8.59961113    | 10.168224     | 7.39408676     | 8.65429066     | 7.82122239     | 1.622E-08 | -1.25857 | down      | PREDICTED: thioredoxin X, chloroplastic [Sesamum indicum]                                   |
| c35890.graph_c1 | 134.996533    | 137.792093    | 139.724935    | 134.360898     | 135.626907     | 136.942438     | 1.534E-41 | -1.11055 | down      | PREDICTED: probable prefoldin subunit 5 [Sesamum indicum]                                   |
| c35891.graph_c0 | 34.6483865    | 33.3618214    | 36.8917687    | 362.144704     | 360.763709     | 347.563343     | 5.012E-78 | 2.25943  | up        | 40S ribosomal protein S6 [Morus notabilis]                                                  |

| #ID             | 0 h-1<br>FPKM | 0 h-2<br>FPKM | 0 h-3<br>FPKM | 28 h-1<br>FPKM | 28 h-2<br>FPKM | 28 h-3<br>FPKM | FDR       | log2FC   | regulated | nr_annotation                                                                                     |
|-----------------|---------------|---------------|---------------|----------------|----------------|----------------|-----------|----------|-----------|---------------------------------------------------------------------------------------------------|
| c35901.graph_c0 | 8.9690827     | 10.2983674    | 9.15270329    | 3.06761299     | 2.6832117      | 2.7378172      | 9.823E-23 | -2.83381 | down      | PREDICTED: uncharacterized protein LOC104435912 [Eucalyptus grandis]                              |
| c35910.graph_c0 | 2.5865758     | 2.07133269    | 2.06078843    | 19.5886454     | 18.773034      | 18.5919575     | 7.391E-25 | 1.99534  | up        | PREDICTED: exosome complex component RRP42 isoform X1 [Sesamum indicum]                           |
| c35914.graph_c0 | 0.94110453    | 0.82429104    | 0.30233915    | 5.81390949     | 6.56176895     | 5.16269996     | 1.544E-05 | 2.00484  | up        | PREDICTED: GTP-binding protein OBGC, chloroplastic [Sesamum indicum]                              |
| c35914.graph_c1 | 3.48304068    | 3.5666785     | 3.54980825    | 26.4784258     | 26.5478737     | 26.2716894     | 6.293E-65 | 1.81251  | up        | PREDICTED: uncharacterized protein LOC105163283 [Sesamum indicum]                                 |
| c35921.graph_c0 | 1.12285783    | 1.31131257    | 0.84170145    | 5.50858455     | 8.16675066     | 6.82568001     | 4.99E-05  | 1.5588   | up        | PREDICTED: rho-N domain-containing protein 1, chloroplastic [Sesamum indicum]                     |
| c35922.graph_c0 | 38.4544225    | 39.4585438    | 39.6112487    | 33.6528688     | 35.4783902     | 35.9898534     | 7.096E-44 | -1.25163 | down      | PREDICTED: protein DEHYDRATION-INDUCED 19 homolog 7-like [Sesamum indicum]                        |
| c35923.graph_c0 | 14.1166392    | 15.9854391    | 18.1404403    | 71.3062496     | 72.0254273     | 74.4060444     | 2.571E-21 | 1.08083  | up        | PREDICTED: uncharacterized protein At5g04816 [Sesamum indicum]                                    |
| c35931.graph_c0 | 40.3877794    | 40.9242735    | 45.3195407    | 2.16100162     | 2.6015758      | 2.17970848     | 4.65E-153 | -5.28175 | down      | PREDICTED: 22.0 kDa heat shock protein-like [Sesamum indicum]                                     |
| c35933.graph_c0 | 4.42916949    | 3.81782621    | 3.95254039    | 0.73770924     | 0.86792539     | 1.00327452     | 1.827E-47 | -3.31376 | down      | hypothetical protein VITISV_009861 [Vitis vinifera]                                               |
| c35935.graph_c0 | 28.8407443    | 28.9535473    | 35.2838392    | 140.544209     | 138.149356     | 144.093268     | 8.755E-30 | 1.09028  | up        | hypothetical protein MIMGU_mgv1a007974mg [Erythranthe ontifata]                                   |
| c35936.graph_c0 | 3.78240134    | 4.96411426    | 2.91632128    | 4.15408599     | 3.25432735     | 3.38970024     | 0.0005191 | -1.198   | down      | -                                                                                                 |
| c35937.graph_c0 | 5.09852834    | 3.60774109    | 3.5018299     | 16.8667825     | 20.0170673     | 19.9148708     | 4.764E-07 | 1.13187  | up        | hypothetical protein MIMGU_mgv1a016751mg [Erythranthe ontifata]                                   |
| c35939.graph_c0 | 1.89737421    | 1.89927414    | 2.14266147    | 18.88813       | 19.1671215     | 20.0499672     | 9.739E-27 | 2.19834  | up        | PREDICTED: uncharacterized protein LOC105156528 [Sesamum indicum]                                 |
| c35942.graph_c0 | 11.5174834    | 12.7009219    | 11.1409771    | 10.5555379     | 10.4927249     | 10.4772439     | 4.652E-48 | -1.25541 | down      | PREDICTED: putative uncharacterized protein At4g01020, chloroplastic [Sesamum indicum]            |
| c35944.graph_c0 | 0.68271918    | 0.77254232    | 0.83917678    | 0.51777012     | 0.58437234     | 0.56332825     | 5.146E-05 | -1.55515 | down      | PREDICTED: DNA-directed RNA polymerase III subunit RPC5 [Sesamum indicum]                         |
| c35957.graph_c0 | 0.01980486    | 0             | 0             | 0.90682582     | 0.8057822      | 0.76345333     | 1.548E-13 | 5.90673  | up        | PREDICTED: glutamate receptor 3.2-like [Sesamum indicum]                                          |
| c35961.graph_c0 | 1.61313137    | 0             | 1.81382047    | 9.96552396     | 10.5858044     | 13.15436       | 7.659E-07 | 2.20212  | up        | -                                                                                                 |
| c35962.graph_c0 | 10.1818575    | 13.019906     | 10.1344975    | 663.401092     | 821.06563      | 651.487658     | 1.39E-80  | 4.91109  | up        | PREDICTED: (-)-isopiperitenol/(-)-carveol dehydrogenase, mitochondrial-like [Sesamum indicum]     |
| c35963.graph_c0 | 1.65706473    | 1.90576803    | 2.03878128    | 311.489765     | 341.030505     | 328.150107     | 0         | 6.35884  | up        | tubulin alpha chain-like [Sesamum indicum]                                                        |
| c35966.graph_c0 | 2.35110521    | 2.29605804    | 2.06330175    | 9.33571748     | 10.4613356     | 10.4065535     | 1.036E-05 | 1.08148  | up        | -                                                                                                 |
| c35974.graph_c1 | 0             | 0.19879677    | 0             | 0.90212384     | 1.17292787     | 1.06002099     | 1.049E-06 | 2.89733  | up        | PREDICTED: pentatricopeptide repeat-containing protein At2g03380, mitochondrial [Sesamum indicum] |
| c35979.graph_c0 | 1.77228675    | 2.17956118    | 1.43154543    | 15.0522259     | 14.0559577     | 14.7149677     | 5.41E-19  | 1.93789  | up        | PREDICTED: uncharacterized protein LOC105171592 [Sesamum indicum]                                 |

| #ID             | 0 h-1<br>FPKM | 0 h-2<br>FPKM | 0 h-3<br>FPKM | 28 h-1<br>FPKM | 28 h-2<br>FPKM | 28 h-3<br>FPKM | FDR       | log2FC   | regulated | nr_annotation                                                                              |
|-----------------|---------------|---------------|---------------|----------------|----------------|----------------|-----------|----------|-----------|--------------------------------------------------------------------------------------------|
| c35983.graph_c0 | 0.16718133    | 0.35860443    | 0.49105057    | 2.4648446      | 2.36657788     | 2.08211324     | 5.436E-07 | 1.66304  | up        | PREDICTED: uncharacterized mitochondrial protein ymf11 [Sesamum indicum]                   |
| c35991.graph_c2 | 4.9122176     | 4.19074129    | 4.23217332    | 29.6973352     | 29.487974      | 30.7213424     | 1.12E-27  | 1.6644   | up        | PREDICTED: ribonuclease 2 [Sesamum indicum]                                                |
| c35992.graph_c0 | 0.06156216    | 0.04108253    | 0.07910981    | 1.05891814     | 0.67331254     | 0.68151886     | 3.099E-06 | 2.63513  | up        | PREDICTED: putative leucine-rich repeat-containing protein DDB_G0290503 [Sesamum indicum]  |
| c35993.graph_c0 | 2.74660134    | 2.69324243    | 2.23294358    | 13.3624122     | 12.6167587     | 11.4687459     | 8.55E-08  | 1.19861  | up        | PREDICTED: tetraspanin-19 [Sesamum indicum]                                                |
| c35995.graph_c0 | 0             | 0.0522414     | 0             | 14.792999      | 16.3533847     | 14.9184764     | 7E-130    | 8.70229  | up        | PREDICTED: LOW QUALITY PROTEIN: interactor of constitutive active ROPs 3 [Sesamum indicum] |
| c36002.graph_c0 | 17.2559374    | 14.8549662    | 16.4978746    | 17.7086203     | 16.3968811     | 17.561157      | 6.977E-13 | -1.00213 | down      | PREDICTED: uncharacterized protein LOC105166164 [Sesamum indicum]                          |
| c36012.graph_c0 | 4.00026863    | 3.66105078    | 4.40614591    | 0.33227111     | 0.5250169      | 0.54226102     | 2.125E-22 | -4.19944 | down      | -                                                                                          |
| c36015.graph_c0 | 21.7776219    | 20.9819504    | 22.3880851    | 18.74611       | 19.6948735     | 17.3147034     | 7.423E-26 | -1.31617 | down      | PREDICTED: uncharacterized protein LOC105158384 [Sesamum indicum]                          |
| c36019.graph_c0 | 2.69984528    | 2.73192429    | 3.58254094    | 1.79160312     | 1.94503111     | 1.68818513     | 5.187E-09 | -1.82764 | down      | PREDICTED: F-box protein SKIP14 [Sesamum indicum]                                          |
| c36022.graph_c0 | 34.8079776    | 35.6322684    | 37.4512756    | 15.5280634     | 14.6320129     | 15.4983112     | 1.16E-103 | -2.33191 | down      | PREDICTED: protein trichome birefringence-like 59 [Sesamum indicum]                        |
| c36025.graph_c0 | 9.97672382    | 10.7549228    | 7.53091433    | 4.36075652     | 5.72289866     | 4.4272391      | 5.422E-15 | -2.04945 | down      | -                                                                                          |
| c36034.graph_c0 | 13.969574     | 15.3585152    | 13.9330335    | 6.83947255     | 6.59732436     | 6.51689009     | 1.747E-85 | -2.20676 | down      | hypothetical protein MIMGU_mgv1a02268/mg [Erythranthe outtata]                             |
| c36037.graph_c0 | 74.9731039    | 74.7315191    | 79.5513232    | 18.3401982     | 18.3958729     | 17.5775511     | 1.41E-171 | -3.16915 | down      | PREDICTED: ethylene-responsive transcription factor ERF107-like [Sesamum indicum]          |
| c36039.graph_c0 | 2.89349168    | 4.16355929    | 4.76400956    | 14.8522474     | 19.5812463     | 19.0905985     | 2.453E-05 | 1.08315  | up        | floricaula, partial [Salvia coccinea]                                                      |
| c36040.graph_c0 | 7.34374668    | 8.10291741    | 7.7211861     | 7.39956723     | 7.17398461     | 7.62172058     | 2.529E-07 | -1.15254 | down      | CYP72A52v1 [Nicotiana tabacum]                                                             |
| c36046.graph_c0 | 7.99675015    | 5.56852709    | 9.82935183    | 5.18025367     | 6.3884846      | 5.51577783     | 0.0009701 | -1.54852 | down      | PREDICTED: uncharacterized protein LOC105174651 [Sesamum indicum]                          |
| c36056.graph_c0 | 3.89290927    | 3.89680743    | 5.40504595    | 25.7893081     | 29.68659       | 26.8554744     | 1.014E-23 | 1.54605  | up        | PREDICTED: uncharacterized protein At2g34160-like [Sesamum indicum]                        |
| c36057.graph_c0 | 22.4777427    | 21.6458109    | 21.9378147    | 21.3824575     | 20.4266457     | 20.6877549     | 1.049E-24 | -1.17036 | down      | hypothetical protein MIMGU_mgv1a011414/mg [Erythranthe outtata]                            |
| c36070.graph_c1 | 2.16449255    | 2.25332636    | 2.44768359    | 14.9762996     | 14.0903538     | 13.4015145     | 5.836E-16 | 1.53653  | up        | PREDICTED: uncharacterized protein LOC105157576 isoform X2 [Sesamum indicum]               |
| c36076.graph_c0 | 0.08161367    | 0.49017238    | 0.83901441    | 15.8374648     | 17.084715      | 15.730538      | 1.964E-32 | 3.99822  | up        | PREDICTED: uncharacterized protein LOC105165595 [Sesamum indicum]                          |
| c36079.graph_c0 | 16.9912507    | 19.3043807    | 16.4304085    | 83.3258432     | 80.7268571     | 70.8399036     | 2.235E-20 | 1.06502  | up        | PREDICTED: abscisic acid receptor PYL4 [Sesamum indicum]                                   |
| c36079.graph_c1 | 3.62148874    | 5.3335027     | 4.17233334    | 24.0214857     | 24.0383519     | 21.9465842     | 1.619E-20 | 1.3234   | up        | PREDICTED: probable E3 ubiquitin-protein ligase XBOS32 [Sesamum indicum]                   |
| c36085.graph_c0 | 0.53327678    | 0.86744252    | 0.770942      | 10.4647273     | 11.5046277     | 10.0018537     | 3.033E-18 | 2.78579  | up        | PREDICTED: putative receptor-like protein kinase At1g72540 [Sesamum indicum]               |

| #ID             | 0 h-1<br>FPKM | 0 h-2<br>FPKM | 0 h-3<br>FPKM | 28 h-1<br>FPKM | 28 h-2<br>FPKM | 28 h-3<br>FPKM | FDR       | log2FC   | regulated | nr_annotation                                                                                     |
|-----------------|---------------|---------------|---------------|----------------|----------------|----------------|-----------|----------|-----------|---------------------------------------------------------------------------------------------------|
| c36088.graph_c0 | 34.1609475    | 35.2392814    | 31.5664703    | 17.6259704     | 20.4322912     | 20.1047766     | 9.332E-79 | -1.88499 | down      | PREDICTED: uncharacterized protein LOC105178899 isoform X2 [Sesamum indicum]                      |
| c36099.graph_c0 | 0.84127951    | 0.52269636    | 0.41006387    | 2.90959722     | 3.23627458     | 2.87313524     | 0.0001234 | 1.26316  | up        | PREDICTED: phyto-sulfokine receptor 2 [Sesamum indicum]                                           |
| c36106.graph_c0 | 7.29621738    | 4.97967507    | 4.04869627    | 0              | 0              | 0              | 8.249E-21 | -Inf     | down      | -                                                                                                 |
| c36117.graph_c0 | 0.90537184    | 0.90627843    | 0.49861657    | 3.05508837     | 4.4559712      | 3.1449235      | 0.0069174 | 1.12089  | up        | -                                                                                                 |
| c36119.graph_c0 | 0.36667573    | 0.3670429     | 0.34554141    | 9.13199161     | 8.90303381     | 8.42295207     | 9.032E-49 | 3.52553  | up        | PREDICTED: uncharacterized protein LOC105159055 [Sesamum indicum]                                 |
| c36125.graph_c0 | 5.31800136    | 4.47159429    | 5.74042753    | 31.384553      | 31.9318196     | 30.2772875     | 2.004E-26 | 1.499    | up        | PREDICTED: protein OS-9 homolog [Sesamum indicum]                                                 |
| c36129.graph_c0 | 0.42000941    | 0.63064498    | 0.53972872    | 2.4115573      | 3.27989628     | 2.41617307     | 0.0009498 | 1.25645  | up        | PREDICTED: glycerol-3-phosphate dehydrogenase [NAD(+)]-like [Cicer arietinum]                     |
| c36141.graph_c0 | 9.28059381    | 7.1264886     | 7.02486316    | 1.66317093     | 1.00112494     | 1.50792655     | 1.212E-27 | -3.57604 | down      | ubiquitin extension protein [Capsicum annuum]                                                     |
| c36144.graph_c0 | 11.3751387    | 11.1967537    | 11.9863529    | 1.92905656     | 1.26899453     | 1.50663321     | 1.09E-132 | -3.96807 | down      | PREDICTED: type I inositol 1,4,5-trisphosphate 5-phosphatase CVP2 isoform X1 [Cucumis melo]       |
| c36150.graph_c0 | 1.48202465    | 0.52493384    | 0.70318536    | 0              | 0              | 0              | 1.684E-08 | -Inf     | down      | hypothetical protein EMIHURAFT_239943 [Emiliania huxleyi CCMP1516]                                |
| c36156.graph_c0 | 11.6191778    | 11.3840984    | 9.45636555    | 11.3364391     | 10.975118      | 10.5659673     | 8.433E-19 | -1.06971 | down      | PREDICTED: UDP-glycosyltransferase 90A1-like [Solanum tuberosum]                                  |
| c36157.graph_c0 | 1.30711437    | 1.49099394    | 1.87500695    | 8.28491158     | 10.1734778     | 7.93222636     | 2.461E-10 | 1.40159  | up        | PREDICTED: katanin p60 ATPase-containing subunit A-like 2 isoform X1 [Sesamum indicum]            |
| c36162.graph_c0 | 560.709512    | 561.688486    | 606.77246     | 571.367304     | 579.801569     | 619.77934      | 1.378E-24 | -1.05683 | down      | hypothetical protein MIMGU_mgv1a009201mg [Erythranthe outafata]                                   |
| c36172.graph_c0 | 17.8985072    | 18.2125692    | 20.3390998    | 363.271316     | 345.18135      | 312.655752     | 1.87E-120 | 3.08424  | up        | -                                                                                                 |
| c36188.graph_c0 | 1.74423702    | 2.13793912    | 1.23506465    | 1.42293016     | 1.61180553     | 1.56220645     | 0.0002732 | -1.24053 | down      | PREDICTED: WEB family protein At1g12150-like [Sesamum indicum]                                    |
| c36190.graph_c0 | 0.0931565     | 0.09324978    | 0.17956468    | 99.1210054     | 79.501923      | 87.5944683     | 7.8E-127  | 8.40677  | up        | unnamed protein product [Coffea canephora]                                                        |
| c36193.graph_c0 | 1.73641286    | 2.15199724    | 0.95629683    | 33.5335377     | 36.0021764     | 34.5716496     | 5.94E-101 | 3.34212  | up        | PREDICTED: GDSL esterase/lipase At1g54790 [Sesamum indicum]                                       |
| c36202.graph_c0 | 0             | 0.20102967    | 0.12903634    | 3.86796785     | 2.89936117     | 4.34726044     | 9.552E-11 | 3.97422  | up        | PREDICTED: NAC domain-containing protein 8-like [Sesamum indicum]                                 |
| c36202.graph_c1 | 0.21770556    | 0             | 0             | 4.11390574     | 3.2144462      | 2.77590923     | 4.723E-11 | 4.47653  | up        | PREDICTED: NAC domain-containing protein 8-like [Sesamum indicum]                                 |
| c36206.graph_c0 | 80.255123     | 77.7708505    | 80.5293913    | 54.3028031     | 55.6646583     | 55.1521731     | 8.35E-77  | -1.62151 | down      | PREDICTED: early nodulin-93-like [Solanum tuberosum]                                              |
| c36211.graph_c0 | 210.783866    | 241.942607    | 201.227282    | 68.933664      | 75.4796657     | 69.4829146     | 1.561E-63 | -2.70208 | down      | PREDICTED: probable WRKY transcription factor 17 [Sesamum indicum]                                |
| c36215.graph_c0 | 14.2416674    | 14.7663707    | 11.6546688    | 1.64129726     | 1.57754642     | 1.90092088     | 1.526E-83 | -4.07658 | down      | PREDICTED: phosphoenolpyruvate carboxylase kinase 2 [Sesamum indicum]                             |
| c36225.graph_c0 | 0.86939937    | 0.68566723    | 0.3724042     | 2.22113444     | 2.80075117     | 3.14049949     | 0.0076794 | 1.0022   | up        | PREDICTED: pentatricopeptide repeat-containing protein At3g07290, mitochondrial [Sesamum indicum] |
| c36234.graph_c0 | 12.293973     | 11.5528376    | 12.574111     | 0.41028928     | 0.493937       | 0.6695854      | 9.18E-123 | -5.62163 | down      | PREDICTED: high mobility group B protein 6 [Sesamum indicum]                                      |



| #ID             | 0 h-1<br>FPKM | 0 h-2<br>FPKM | 0 h-3<br>FPKM | 28 h-1<br>FPKM | 28 h-2<br>FPKM | 28 h-3<br>FPKM | FDR       | log2FC   | regulated | nr_annotation                                                                                           |
|-----------------|---------------|---------------|---------------|----------------|----------------|----------------|-----------|----------|-----------|---------------------------------------------------------------------------------------------------------|
| c36238.graph_c0 | 3.63785479    | 3.9289842     | 2.89098696    | 27.1007119     | 25.945733      | 28.1605237     | 9.407E-34 | 1.86992  | up        | PREDICTED: probable UDP-arabinopyranose mutase 5 isoform X1 [Sesamum indicum]                           |
| c36244.graph_c0 | 0.11539944    | 0.13861799    | 0.17795141    | 4.00906461     | 4.60427647     | 4.83176354     | 2.429E-30 | 3.86457  | up        | PREDICTED: uncharacterized protein LOC105158603 isoform X1 [Sesamum indicum]                            |
| c36245.graph_c0 | 0             | 0             | 0             | 3.27745674     | 2.75747005     | 3.40375374     | 2.481E-18 | Inf      | up        | -                                                                                                       |
| c36254.graph_c1 | 0.55944952    | 0.33600583    | 0             | 4.18802825     | 3.92824721     | 3.31786102     | 1.617E-08 | 2.60623  | up        | PREDICTED: pentatricopeptide repeat-containing protein DOT4, chloroplastic isoform X1 [Sesamum indicum] |
| c36264.graph_c0 | 4.88198056    | 6.14799665    | 7.08302712    | 31.7048422     | 28.8848618     | 29.0463809     | 2.633E-13 | 1.21213  | up        | -                                                                                                       |
| c36266.graph_c0 | 413.501845    | 410.015453    | 403.882408    | 209.000847     | 187.480799     | 198.828163     | 1.1E-144  | -2.13404 | down      | PREDICTED: uncharacterized protein LOC105176605 [Sesamum indicum]                                       |
| c36267.graph_c0 | 0.03976429    | 0.19902054    | 0.15329606    | 12.571699      | 12.5775024     | 12.1214241     | 2.829E-60 | 5.47201  | up        | PREDICTED: transcription factor bHLH30-like isoform X2 [Sesamum indicum]                                |
| c36268.graph_c0 | 0             | 0             | 0             | 5.16509788     | 4.03580692     | 9.15881882     | 2.206E-06 | Inf      | up        | -                                                                                                       |
| c36275.graph_c0 | 17.0330058    | 17.3390459    | 17.3744418    | 122.710825     | 121.500265     | 117.509144     | 4.087E-83 | 1.7144   | up        | PREDICTED: gamma carbonic anhydrase 2, mitochondrial [Sesamum indicum]                                  |
| c36277.graph_c0 | 17.281138     | 20.282027     | 14.3020885    | 5.13916041     | 7.88622521     | 5.43464231     | 2.456E-19 | -2.57934 | down      | PREDICTED: ethylene-responsive transcription factor ABR1-like [Sesamum indicum]                         |
| c36280.graph_c0 | 7.91456347    | 7.64929945    | 10.0536248    | 44.3651249     | 44.2961263     | 41.9204581     | 3E-17     | 1.2555   | up        | -                                                                                                       |
| c36282.graph_c0 | 32.0829521    | 32.858483     | 32.4478557    | 171.752168     | 180.808405     | 173.357627     | 1.896E-37 | 1.34225  | up        | hypothetical protein M569_11398, partial [Genlisea aurea]                                               |
| c36287.graph_c0 | 2.86635903    | 2.15192194    | 3.03879249    | 0.88538262     | 0.70536838     | 0.93495469     | 6.741E-16 | -2.76477 | down      | PREDICTED: glutamate decarboxylase-like [Sesamum indicum]                                               |
| c36289.graph_c0 | 5.40734069    | 4.31506368    | 4.61623394    | 3.51778376     | 3.57325753     | 2.96018541     | 6.213E-16 | -1.6024  | down      | PREDICTED: transcription factor GAMYB-like [Sesamum indicum]                                            |
| c36295.graph_c0 | 0.44881411    | 0.39934536    | 0.83307452    | 4.31302949     | 4.51603405     | 3.6376959      | 6.051E-07 | 1.78959  | up        | PREDICTED: uncharacterized protein LOC105171863 [Sesamum indicum]                                       |
| c36304.graph_c0 | 0.34367535    | 0.11467316    | 0.36803036    | 1.79009908     | 2.25529065     | 1.69849562     | 0.0001944 | 1.70193  | up        | PREDICTED: E3 ubiquitin-protein ligase KNF5-like [Sesamum indicum]                                      |
| c36310.graph_c1 | 0.07390919    | 0.14796641    | 0.18995248    | 2.63212203     | 2.03705092     | 2.93677419     | 1.211E-08 | 3.10812  | up        | PREDICTED: histone H3-like centromeric protein HTR12 [Sesamum indicum]                                  |
| c36317.graph_c0 | 22.8430936    | 25.3102606    | 21.2565474    | 22.5561315     | 19.4873328     | 21.3953644     | 4.724E-22 | -1.21888 | down      | PREDICTED: zinc finger CCCH domain-containing protein 44-like isoform X3 [Sesamum indicum]              |
| c36326.graph_c0 | 0.69600685    | 0.48769266    | 0.26831891    | 2.78219572     | 3.8366036      | 3.38473485     | 0.0001525 | 1.70425  | up        | PREDICTED: glycosyltransferase 6-like [Sesamum indicum]                                                 |
| c36336.graph_c0 | 6.33676463    | 3.41552074    | 4.38468877    | 0              | 0              | 0              | 5.572E-22 | -Inf     | down      | hypothetical protein EMIHUDRAFT_109093 [Emiliania huxleyi CCMP1516]                                     |
| c36337.graph_c0 | 0.64222967    | 0.61492178    | 0.68176176    | 0.22323726     | 0.23821001     | 0.36431957     | 1.263E-08 | -2.32065 | down      | -                                                                                                       |
| c36340.graph_c0 | 2.91235034    | 3.44531509    | 3.74248549    | 2.88638106     | 2.95361566     | 3.92543895     | 0.0007586 | -1.14054 | down      | PREDICTED: putative DNA-binding protein ESCAROLA [Sesamum indicum]                                      |

| #ID             | 0 h-1<br>FPKM | 0 h-2<br>FPKM | 0 h-3<br>FPKM | 28 h-1<br>FPKM | 28 h-2<br>FPKM | 28 h-3<br>FPKM | FDR       | log2FC   | regulated | nr_annotation                                                                                    |
|-----------------|---------------|---------------|---------------|----------------|----------------|----------------|-----------|----------|-----------|--------------------------------------------------------------------------------------------------|
| c36343.graph_c0 | 1.93851606    | 2.04826037    | 1.52232049    | 0.50877028     | 0.88340742     | 0.76643518     | 3.049E-11 | -2.43905 | down      | PREDICTED: brefeldin A-inhibited guanine nucleotide-exchange protein 1-like [Sesamum indicum]    |
| c36346.graph_c0 | 3.5450544     | 3.9775564     | 2.50304135    | 23.7549952     | 25.5388378     | 22.6876904     | 6.508E-33 | 1.75749  | up        | PREDICTED: xylosyltransferase 1 [Sesamum indicum]                                                |
| c36365.graph_c0 | 42.4170837    | 38.7494995    | 35.1036205    | 21.3504766     | 22.790664      | 25.7256701     | 2.085E-40 | -1.8224  | down      | unnamed protein product [Vitis vinifera]                                                         |
| c36372.graph_c0 | 0.55630159    | 0.87506358    | 0.20424845    | 13.6312517     | 13.8201343     | 14.5164447     | 3.66E-25  | 3.6015   | up        | PREDICTED: uncharacterized protein LOC105168457 [Sesamum indicum]                                |
| c36376.graph_c0 | 0.23981899    | 0.28807096    | 0.18490614    | 2.09158874     | 2.04588423     | 1.45071143     | 7.281E-05 | 1.88239  | up        | hypothetical protein CICLE_v10011295mg [Citrus clementina]                                       |
| c36380.graph_c0 | 0.35686282    | 0.17861008    | 0.34393714    | 9.09941819     | 10.2455078     | 9.96473581     | 2.641E-50 | 3.96698  | up        | PREDICTED: uncharacterized protein LOC105162690 isoform X1 [Sesamum indicum]                     |
| c36386.graph_c0 | 44.502157     | 45.4816503    | 45.0436141    | 38.6929012     | 37.3877154     | 40.8918779     | 1.954E-45 | -1.29735 | down      | PREDICTED: uncharacterized protein LOC105179031 [Sesamum indicum]                                |
| c36389.graph_c1 | 0.30790509    | 0.13698374    | 0.30774351    | 2.56107947     | 2.67162467     | 2.7796634      | 7.871E-09 | 2.31992  | up        | PREDICTED: transcription factor MYB3-like [Sesamum indicum]                                      |
| c36392.graph_c0 | 20.5208776    | 19.7855017    | 22.4040711    | 231.830297     | 252.090166     | 223.500974     | 1.63E-140 | 2.40348  | up        | PREDICTED: aspartic proteinase-like isoform X1 [Sesamum indicum]                                 |
| c36394.graph_c0 | 0.15836895    | 0.07926377    | 0.10175519    | 6.38814122     | 5.71592958     | 5.77620308     | 2.419E-16 | 4.63326  | up        | PREDICTED: auxin-induced protein 15A-like [Sesamum indicum]                                      |
| c36395.graph_c0 | 5.75674353    | 5.06954821    | 5.80574542    | 2.80696589     | 2.48660764     | 1.68543374     | 2.557E-33 | -2.34577 | down      | PREDICTED: uncharacterized protein LOC105174263 [Sesamum indicum]                                |
| c36397.graph_c0 | 0.3102294     | 0.31054005    | 0.33221422    | 3.00630591     | 2.54476159     | 2.63710515     | 5.061E-06 | 2.01145  | up        | PREDICTED: KING-H2 finger protein A1L58-like [Sesamum indicum]                                   |
| c36398.graph_c0 | 3.81032755    | 4.10753863    | 4.1431261     | 0.79884349     | 1.34639078     | 1.04295962     | 9.824E-20 | -3.01158 | down      | hypothetical protein MIMGU_mgv1a0208155mg [Erythranthe guttata]                                  |
| c36403.graph_c0 | 0.43806562    | 0.24556239    | 0.29272447    | 2.48339183     | 2.50674285     | 2.50445649     | 6.1E-10   | 1.85408  | up        | hypothetical protein MIMGU_mgv1a0005 / /mg [Erythranthe guttata]                                 |
| c36404.graph_c0 | 0.68405378    | 0.65840265    | 0.81141802    | 0.439801       | 0.91505437     | 0.73335126     | 0.002802  | -1.13793 | down      | PREDICTED: putative E3 ubiquitin-protein ligase RF4 [Sesamum indicum]                            |
| c36405.graph_c0 | 14.2342176    | 13.5487693    | 14.8618707    | 160.583806     | 167.885614     | 156.850153     | 3.66E-146 | 2.41695  | up        | cyclophilin [Ricinus communis]                                                                   |
| c36418.graph_c0 | 14.9485316    | 11.8782425    | 11.0899946    | 12.7125928     | 12.2873211     | 11.9727905     | 1.076E-09 | -1.12372 | down      | PREDICTED: acyl-coenzyme A thioesterase 15 [Sesamum indicum]                                     |
| c36426.graph_c0 | 20.3023279    | 21.0407728    | 25.167412     | 129.515716     | 132.476128     | 135.168005     | 1.246E-58 | 1.48481  | up        | -                                                                                                |
| c36433.graph_c0 | 36.2507744    | 34.6861738    | 32.761706     | 11.9882744     | 11.1741221     | 11.883862      | 2.16E-183 | -2.65421 | down      | PREDICTED: uncharacterized protein At5g19025-like [Sesamum indicum]                              |
| c36438.graph_c0 | 3.44900567    | 3.10431217    | 3.87343966    | 3.28611699     | 2.52960504     | 3.33461703     | 6.122E-10 | -1.27997 | down      | PREDICTED: uncharacterized protein LOC105171186 [Sesamum indicum]                                |
| c36443.graph_c0 | 0.58104785    | 1.2974816     | 0.68923338    | 13.1888235     | 14.4307127     | 14.5525191     | 3.651E-35 | 2.94811  | up        | PREDICTED: (S)-ureidoglycine aminohydrolase [Sesamum indicum]                                    |
| c36444.graph_c0 | 2.20677469    | 2.65078133    | 3.48397407    | 0.50407378     | 0.41375579     | 0.44871283     | 3.88E-12  | -3.70593 | down      | M protein repeat-containing [Populus trichocarpa]                                                |
| c36448.graph_c0 | 6.74594766    | 6.15246247    | 4.2380848     | 2.17907372     | 2.29541581     | 3.46730741     | 7.628E-10 | -2.19231 | down      | PREDICTED: LOW QUALITY PROTEIN: protein LOW PSII ACCUMULATION 2, chloroplastic [Sesamum indicum] |
| c36451.graph_c0 | 780.803198    | 806.213247    | 747.287511    | 69.0433179     | 64.4168439     | 75.3459234     | 0         | -4.57198 | down      | hypothetical protein MIMGU_mgv1a0240/8mg [Erythranthe guttata]                                   |

| #ID             | 0 h-1<br>FPKM | 0 h-2<br>FPKM | 0 h-3<br>FPKM | 28 h-1<br>FPKM | 28 h-2<br>FPKM | 28 h-3<br>FPKM | FDR       | log2FC   | regulated | nr_annotation                                                                                                  |
|-----------------|---------------|---------------|---------------|----------------|----------------|----------------|-----------|----------|-----------|----------------------------------------------------------------------------------------------------------------|
| c36459.graph_c0 | 28.1867476    | 34.7984659    | 27.3304562    | 169.474807     | 176.701506     | 163.23799      | 6.378E-63 | 1.40595  | up        | PREDICTED: shikimate O-hydroxycinnamoyltransferase [Sesamum indicum]                                           |
| c36463.graph_c1 | 0.56335408    | 0.77538751    | 0.40721191    | 3.60821199     | 4.29762514     | 3.23661053     | 2.435E-06 | 1.58701  | up        | PREDICTED: leucine-rich repeat receptor-like serine/threonine/tyrosine-protein kinase SOBIR1 [Sesamum indicum] |
| c36469.graph_c0 | 1.7759811     | 2.07667479    | 2.10043741    | 10.3718737     | 10.4993353     | 11.1850629     | 3.456E-25 | 1.33693  | up        | PREDICTED: uncharacterized protein LOC105171114 [Sesamum indicum]                                              |
| c36477.graph_c0 | 18.8265878    | 18.5641646    | 16.9034423    | 10.8749658     | 10.0726186     | 10.4361866     | 9.53E-99  | -1.8799  | down      | PREDICTED: uncharacterized protein LOC105159352 [Sesamum indicum]                                              |
| c36479.graph_c0 | 6.2517644     | 7.10045098    | 4.37737183    | 5.65055634     | 6.75873249     | 4.94354654     | 0.0002204 | -1.11808 | down      | PREDICTED: UDP-glycosyltransferase 74B1 [Vitis vinifera]                                                       |
| c36480.graph_c0 | 2.50489207    | 2.10127212    | 1.81345661    | 13.1284092     | 14.2730859     | 12.3446837     | 2.079E-32 | 1.54291  | up        | PREDICTED: methionine S-methyltransferase-like isoform X1 [Sesamum indicum]                                    |
| c36483.graph_c0 | 2.3160295     | 1.86963601    | 2.35214985    | 9.39377105     | 10.3692392     | 10.1907821     | 1.508E-08 | 1.10454  | up        | PREDICTED: triose phosphate/phosphate translocator, chloroplastic isoform X2 [Sesamum indicum]                 |
| c36491.graph_c0 | 0.25380118    | 0.10162213    | 0.26091565    | 76.957226      | 81.4102254     | 78.2397029     | 0         | 7.49125  | up        | acetylajmalan acetylerase [Striga asiatica]                                                                    |
| c36492.graph_c0 | 3.93749026    | 5.30577528    | 5.64365752    | 2.97181236     | 4.07459203     | 5.20920472     | 0.0001617 | -1.3732  | down      | -                                                                                                              |
| c36493.graph_c0 | 4.94490717    | 5.2052086     | 3.60587068    | 2.99494169     | 3.10333582     | 3.31665081     | 8.712E-11 | -1.63313 | down      | PREDICTED: plastidial pyruvate kinase 4, chloroplastic [Sesamum indicum]                                       |
| c36504.graph_c0 | 4.08400932    | 4.84116968    | 5.66243844    | 49.5226483     | 58.9608228     | 57.8743683     | 1.444E-39 | 2.4172   | up        | hypothetical protein MIMGU_mgv1a014610mg [Erythranthe outtata]                                                 |
| c36508.graph_c0 | 0.18668804    | 0.22424997    | 0.16793106    | 8.99583524     | 6.90954935     | 6.97516244     | 9.536E-34 | 4.2157   | up        | PREDICTED: uncharacterized protein LOC105176006 [Sesamum indicum]                                              |
| c36519.graph_c1 | 5.93133978    | 6.01540121    | 5.44070855    | 4.38176593     | 4.6477202      | 4.38546568     | 1.027E-29 | -1.46377 | down      | PREDICTED: uncharacterized protein LOC105168551 [Sesamum indicum]                                              |
| c36532.graph_c0 | 1.25095327    | 1.14608677    | 1.30781653    | 14.2079517     | 15.1520392     | 14.1838935     | 6.326E-60 | 2.46334  | up        | PREDICTED: uncharacterized protein LOC105171185 [Sesamum indicum]                                              |
| c36534.graph_c0 | 56.5780661    | 60.2174521    | 57.9930426    | 38.8694839     | 37.5496251     | 40.6703798     | 5.89E-93  | -1.66836 | down      | hypothetical protein MIMGU_mgv1a004559mg [Erythranthe outtata]                                                 |
| c36536.graph_c0 | 7.92304631    | 7.7668908     | 9.54947748    | 35.0668189     | 38.0088025     | 37.2989669     | 3.191E-17 | 1.03549  | up        | unnamed protein product [Coffea canephora]                                                                     |
| c36541.graph_c0 | 0.49983457    | 0.44474229    | 0.2141024     | 2.48239203     | 3.44405212     | 3.14546195     | 4.883E-08 | 1.88789  | up        | PREDICTED: organic cation/carnitine transporter 7-like [Sesamum indicum]                                       |
| c36548.graph_c0 | 1.94952592    | 2.10759633    | 2.30480056    | 1.58693271     | 1.17698512     | 1.75739704     | 2.934E-05 | -1.58385 | down      | hypothetical protein MIMGU_mgv1a019201mg [Erythranthe outtata]                                                 |
| c36549.graph_c0 | 2.89047464    | 2.36193389    | 2.50151742    | 18.7784036     | 16.9164274     | 16.302578      | 7.659E-16 | 1.65597  | up        | -                                                                                                              |
| c36558.graph_c0 | 1.01066323    | 1.46692912    | 1.10393092    | 7.67598699     | 8.15766198     | 6.74304836     | 2.924E-08 | 1.56491  | up        | PREDICTED: uncharacterized protein LOC105159405 [Sesamum indicum]                                              |
| c36561.graph_c0 | 1032.83313    | 1046.67282    | 1077.48139    | 206.181746     | 200.142557     | 235.285718     | 0         | -3.38911 | down      | hypothetical protein MIMGU_mgv1a011962mg [Erythranthe outtata]                                                 |
| c36563.graph_c0 | 0.47436479    | 1.38799324    | 0.84403043    | 4.90627962     | 8.28512988     | 6.27573183     | 0.0001942 | 1.75285  | up        | PREDICTED: cytochrome P450 CYP736A12-like [Sesamum indicum]                                                    |

| #ID             | 0 h-1<br>FPKM | 0 h-2<br>FPKM | 0 h-3<br>FPKM | 28 h-1<br>FPKM | 28 h-2<br>FPKM | 28 h-3<br>FPKM | FDR       | log2FC   | regulated | nr_annotation                                                                               |
|-----------------|---------------|---------------|---------------|----------------|----------------|----------------|-----------|----------|-----------|---------------------------------------------------------------------------------------------|
| c36567.graph_c0 | 0.15150885    | 0.25276761    | 0.19469487    | 10.9381656     | 11.5000667     | 10.7524762     | 7.96E-112 | 4.69995  | up        | PREDICTED: uncharacterized protein LOC105164077 [Sesamum indicum]                           |
| c36568.graph_c0 | 1.49904116    | 0.69255795    | 0.59271607    | 6.6207741      | 7.34000014     | 7.7960092      | 8.17E-06  | 1.88652  | up        | hypothetical protein MIMGU_mgv1a007969mg [Erythranthe diffusa]                              |
| c36568.graph_c1 | 0.74314382    | 0.83687396    | 0.71622693    | 4.45592934     | 6.0958885      | 4.79291166     | 8.365E-05 | 1.64993  | up        | PREDICTED: probable purine permease 9 [Sesamum indicum]                                     |
| c36569.graph_c0 | 0.21343015    | 0             | 0.45711032    | 7.13551097     | 7.09630437     | 6.24444033     | 3.067E-17 | 3.82401  | up        | PREDICTED: uncharacterized protein LOC105167095 [Sesamum indicum]                           |
| c36570.graph_c0 | 6.17352697    | 5.38430076    | 4.79135466    | 30.4752703     | 32.2694939     | 30.5950882     | 2.641E-36 | 1.42552  | up        | PREDICTED: protein trichome birefringence-like 23 [Sesamum indicum]                         |
| c36574.graph_c0 | 29.5570487    | 29.8924507    | 25.6157524    | 27.449085      | 30.9736728     | 31.8195268     | 2.42E-25  | -1.00311 | down      | PREDICTED: uncharacterized protein LOC105176146 [Sesamum indicum]                           |
| c36575.graph_c0 | 32.6154049    | 31.9629003    | 31.2691433    | 28.9530506     | 34.1820933     | 32.3936621     | 2.637E-35 | -1.09487 | down      | PREDICTED: PCI domain-containing protein 2 [Sesamum indicum]                                |
| c36586.graph_c0 | 1.40038005    | 1.86904309    | 1.39964519    | 51.3983016     | 50.747415      | 43.417051      | 2.138E-84 | 3.87196  | up        | PREDICTED: GDP-mannose 3,5-epimerase 2 [Sesamum indicum]                                    |
| c36586.graph_c1 | 1.44949874    | 1.10548586    | 1.41917201    | 36.7717244     | 39.9051167     | 31.765636      | 2.227E-55 | 3.67818  | up        | GDP-mannose 3,5-epimerase 1 [Gossypium arboreum]                                            |
| c36593.graph_c0 | 5.5431604     | 5.14621386    | 4.94562796    | 4.71758844     | 5.10767855     | 4.32644454     | 1.354E-14 | -1.23371 | down      | PREDICTED: protein YIPF5 homolog [Nicotiana tomentosiformis]                                |
| c36599.graph_c0 | 3.99975509    | 4.05860627    | 4.92861719    | 33.5300426     | 31.3171927     | 32.591831      | 3.513E-35 | 1.81414  | up        | PREDICTED: trafficking protein particle complex subunit 3-like isoform X1 [Sesamum indicum] |
| c36600.graph_c0 | 0.08138728    | 0.10862504    | 0.06972392    | 6.99963049     | 5.60789625     | 5.84035436     | 6.225E-42 | 5.06229  | up        | hypothetical protein MIMGU_mgv1a021873mg [Erythranthe diffusa]                              |
| c36602.graph_c0 | 19.1787674    | 17.6649216    | 19.5016829    | 19.4539102     | 19.0497497     | 19.3215618     | 3.153E-25 | -1.05358 | down      | PREDICTED: TOM1-like protein 2 [Sesamum indicum]                                            |
| c36605.graph_c0 | 9.60312159    | 10.0071064    | 9.80902909    | 6.7289475      | 5.33231614     | 6.16250889     | 8.593E-28 | -1.78134 | down      | PREDICTED: protein FAR-RED IMPAIRED RESPONSE 1 isoform X1 [Sesamum indicum]                 |
| c36606.graph_c0 | 170.246824    | 155.806892    | 158.850346    | 52.931889      | 70.3134747     | 78.5934397     | 2.86E-142 | -2.35339 | down      | Gibberellin 20 oxidase 1-D GN=GA20ox1D OS=Triticum aestivum (Wheat)                         |
| c36607.graph_c0 | 54.7426035    | 48.1577325    | 54.3772636    | 48.2376329     | 51.4729797     | 49.2196663     | 7.747E-26 | -1.16962 | down      | PREDICTED: nuclear pore complex protein NUP50A-like [Sesamum indicum]                       |
| c36608.graph_c0 | 1.95914512    | 2.54943898    | 4.02812648    | 10.8216049     | 17.870452      | 18.5901921     | 0.0024075 | 1.37079  | up        | -                                                                                           |
| c36617.graph_c0 | 2.60037857    | 1.60183535    | 1.54227204    | 13.0842011     | 13.126452      | 10.3207145     | 0.0001205 | 1.58311  | up        | predicted Rac-like GTPase ortholog, partial [Nicotiana glauca]                              |
| c36625.graph_c0 | 3.05897799    | 3.33422252    | 4.28032185    | 78.2583145     | 74.94234       | 66.1963858     | 3.749E-88 | 3.26588  | up        | PREDICTED: uncharacterized protein LOC105164615 [Sesamum indicum]                           |
| c36627.graph_c0 | 14.155991     | 14.0109507    | 11.446028     | 58.0895231     | 61.2170526     | 57.1165155     | 6.276E-18 | 1.06691  | up        | PREDICTED: uncharacterized protein LOC105159910 [Sesamum indicum]                           |
| c36632.graph_c0 | 0.67359575    | 0.41205405    | 0.76941974    | 18.0867258     | 18.3197605     | 15.9348715     | 3.357E-66 | 3.7239   | up        | PREDICTED: protein trichome birefringence-like 23 [Sesamum indicum]                         |
| c36639.graph_c0 | 0.09696325    | 0.19412068    | 0.31150402    | 2.74842081     | 2.89516068     | 2.70272769     | 5.379E-09 | 2.68827  | up        | PREDICTED: B-box zinc finger protein 24 [Sesamum indicum]                                   |
| c36654.graph_c0 | 20.0131601    | 18.9028003    | 23.2991103    | 149.923002     | 146.27642      | 148.269082     | 4.338E-85 | 1.74395  | up        | PREDICTED: uncharacterized protein LOC105177676 [Sesamum indicum]                           |
| c36664.graph_c0 | 5.84940272    | 3.00895306    | 3.34076181    | 0              | 0              | 0              | 3.297E-16 | -Inf     | down      | predicted protein [Hordeum vulgare subsp. vulgare]                                          |

| #ID             | 0 h-1<br>FPKM | 0 h-2<br>FPKM | 0 h-3<br>FPKM | 28 h-1<br>FPKM | 28 h-2<br>FPKM | 28 h-3<br>FPKM | FDR       | log2FC   | regulated | nr_annotation                                                                                                      |
|-----------------|---------------|---------------|---------------|----------------|----------------|----------------|-----------|----------|-----------|--------------------------------------------------------------------------------------------------------------------|
| c36665.graph_c0 | 0.57681259    | 0.73486023    | 0.33692137    | 7.4316994      | 7.88009876     | 7.65022913     | 6.06E-16  | 2.71605  | up        | PREDICTED: LOW QUALITY PROTEIN: single-stranded DNA-binding protein WHY1, chloroplastic, partial [Sesamum indicum] |
| c36666.graph_c0 | 12.7048608    | 11.8970936    | 13.16633      | 3.41190989     | 3.9363666      | 4.02146421     | 4.154E-91 | -2.82289 | down      | PREDICTED: uncharacterized protein LOC105167713 [Sesamum indicum]                                                  |
| c36669.graph_c0 | 1.30437649    | 1.45490349    | 1.67617543    | 24.7566905     | 29.4941819     | 25.7709694     | 8.083E-64 | 3.07922  | up        | PREDICTED: enoyl-[acyl-carrier-protein] reductase [NADH], chloroplastic-like [Sesamum indicum]                     |
| c36674.graph_c0 | 9.79846317    | 10.4599875    | 10.4579843    | 88.2257435     | 91.4087742     | 93.3823596     | 3.05E-118 | 2.06084  | up        | PREDICTED: peroxidase 17 [Sesamum indicum]                                                                         |
| c36675.graph_c0 | 3.2911882     | 2.83119703    | 2.51115111    | 2.16776505     | 2.12602037     | 1.98236393     | 4.958E-08 | -1.54782 | down      | PREDICTED: nuclear transcription factor Y subunit B-3-like [Sesamum indicum]                                       |
| c36679.graph_c0 | 23.9546694    | 28.701725     | 18.656181     | 22.0703991     | 23.9765153     | 23.5340202     | 2.098E-05 | -1.1224  | down      | hypothetical protein MIMGU_mgv1a014406mg [Erythranthe ontifata]                                                    |
| c36684.graph_c0 | 18.2798318    | 18.9581893    | 22.1251394    | 12.4070645     | 12.2601548     | 12.1228055     | 8.057E-18 | -1.78337 | down      | PREDICTED: uncharacterized protein LOC105176815 isoform X1 [Sesamum indicum]                                       |
| c36690.graph_c0 | 2.90119621    | 2.52380234    | 2.08598981    | 11.9987827     | 11.6270438     | 11.4295545     | 3.887E-10 | 1.1358   | up        | unnamed protein product [Coffea canephora]                                                                         |
| c36691.graph_c0 | 0.63963765    | 0.57436716    | 0.54394392    | 4.23865695     | 4.22216631     | 4.26760119     | 1.689E-25 | 1.76744  | up        | PREDICTED: uncharacterized protein LOC105169716 isoform X1 [Sesamum indicum]                                       |
| c36695.graph_c0 | 7.15790988    | 6.79397782    | 6.55967079    | 4.97433719     | 5.05278011     | 4.32961977     | 2.021E-28 | -1.60495 | down      | PREDICTED: two-pore potassium channel $\delta$ -like [Sesamum indicum]                                             |
| c36697.graph_c0 | 0.15812729    | 0.11871422    | 0.30479974    | 1.81008453     | 1.89375513     | 2.36791164     | 3.072E-07 | 2.28386  | up        | PREDICTED: rho GTPase-activating protein RENT1 [Sesamum indicum]                                                   |
| c36705.graph_c0 | 6.8441927     | 4.89360438    | 5.70631778    | 29.4017832     | 30.0224986     | 28.2922267     | 7.149E-23 | 1.24094  | up        | PREDICTED: putative tRNA (cytidine(32)/guanosine(34)-2'-O)-methyltransferase [Sesamum indicum]                     |
| c36707.graph_c0 | 0.13521344    | 0             | 0.08687731    | 3.04644281     | 4.79145872     | 3.92928227     | 4.329E-13 | 4.63989  | up        | PREDICTED: uncharacterized protein LOC105163665 [Sesamum indicum]                                                  |
| c36710.graph_c0 | 6.73422813    | 6.74097144    | 6.34608316    | 6.52586426     | 5.89224356     | 4.52629415     | 2.007E-05 | -1.31733 | down      | hypothetical protein MIMGU_mgv1a009490mg [Erythranthe ontifata]                                                    |
| c36710.graph_c1 | 11.2816424    | 9.61991121    | 10.3808236    | 9.31293587     | 13.5270519     | 9.25129693     | 1.683E-05 | -1.05436 | down      | PREDICTED: zinc finger CCCH domain-containing protein 20-like [Sesamum indicum]                                    |
| c36719.graph_c0 | 0.27511764    | 0.55078625    | 0.61868984    | 8.74798365     | 9.2526563      | 9.2185829      | 6.214E-18 | 3.13756  | up        | PREDICTED: uncharacterized protein LOC105157890 [Sesamum indicum]                                                  |
| c36719.graph_c1 | 0.30257204    | 0.70670837    | 0.64802841    | 12.6446877     | 12.4097472     | 13.9666325     | 3.311E-35 | 3.46114  | up        | PREDICTED: uncharacterized protein LOC105157890 [Sesamum indicum]                                                  |
| c36723.graph_c0 | 0.91393027    | 0.77562982    | 0.56168706    | 23.7682132     | 22.7642632     | 22.3639609     | 1.31E-154 | 3.85069  | up        | PREDICTED: dolichyl-diphosphooligosaccharide--protein glycosyltransferase subunit STT3A [Sesamum indicum]          |
| c36725.graph_c0 | 1.43323798    | 2.08679731    | 1.50690072    | 21.6856568     | 26.1638216     | 23.5680011     | 7.69E-20  | 2.7383   | up        | PREDICTED: uncharacterized protein LOC104897046 [Beta vulgaris subsp. vulgaris]                                    |
| c36729.graph_c1 | 0.17854026    | 0.40211785    | 0.34414696    | 30.2994348     | 30.901728      | 27.9006342     | 1.42E-125 | 5.49411  | up        | PREDICTED: probable inactive receptor kinase At5g58300-like isoform X1 [Glycine max]                               |
| c36731.graph_c0 | 6.63703525    | 8.00648764    | 7.21672182    | 141.620616     | 148.195347     | 145.536546     | 1.77E-100 | 3.22472  | up        | hypothetical protein 0_2321_02, partial [Pinus lambertiana]                                                        |
| c36731.graph_c2 | 5.3185548     | 5.89943518    | 6.46511816    | 78.250155      | 75.840658      | 80.134043      | 1.63E-52  | 2.63481  | up        | PREDICTED: tubulin beta-1 chain [Sesamum indicum]                                                                  |

| #ID             | 0 h-1<br>FPKM | 0 h-2<br>FPKM | 0 h-3<br>FPKM | 28 h-1<br>FPKM | 28 h-2<br>FPKM | 28 h-3<br>FPKM | FDR       | log2FC   | regulated | nr_annotation                                                                                |
|-----------------|---------------|---------------|---------------|----------------|----------------|----------------|-----------|----------|-----------|----------------------------------------------------------------------------------------------|
| c36731.graph_c3 | 2.76625666    | 2.42289832    | 1.333031      | 30.6601158     | 40.1633456     | 34.8617107     | 3.453E-13 | 2.93579  | up        | PREDICTED: tubulin beta-6 chain-like [Citrus sinensis]                                       |
| c36732.graph_c0 | 1.26794341    | 1.60766988    | 1.62935748    | 11.345107      | 12.2589992     | 12.4324746     | 1.615E-27 | 1.90695  | up        | PREDICTED: LOW QUALITY PROTEIN: probable galacturonosyltransferase-like 7 [Sesamum indicum]  |
| c36736.graph_c0 | 86.5260092    | 84.9418416    | 88.079676     | 32.4411919     | 27.9133536     | 32.6027194     | 4.57E-193 | -2.57169 | down      | PREDICTED: uncharacterized protein LOC105162600 [Sesamum indicum]                            |
| c36738.graph_c0 | 3.09743751    | 3.62989947    | 2.62119282    | 13.7817349     | 15.7156406     | 13.485979      | 3.647E-06 | 1.11242  | up        | PREDICTED: uncharacterized protein LOC105156818 [Sesamum indicum]                            |
| c36759.graph_c0 | 1418.62285    | 1555.23514    | 1461.46938    | 45.2661566     | 46.7775056     | 49.9817323     | 0         | -6.05511 | down      | PREDICTED: GEM-like protein 5 [Sesamum indicum]                                              |
| c36760.graph_c0 | 16.3360711    | 16.2620843    | 16.701214     | 4.78854282     | 4.95536486     | 4.74598881     | 2.79E-137 | -2.85754 | down      | PREDICTED: sodium/hydrogen exchanger 1-like [Sesamum indicum]                                |
| c36762.graph_c0 | 0             | 0.42407859    | 0.09073544    | 16.3705244     | 16.2174515     | 13.4838401     | 8.684E-42 | 5.39248  | up        | PREDICTED: glucomannan 4-beta-mannosyltransferase 2-like [Sesamum indicum]                   |
| c36762.graph_c1 | 0.10188959    | 0             | 0.06546608    | 14.3662364     | 13.3391094     | 13.11254       | 6E-57     | 6.84275  | up        | PREDICTED: glucomannan 4-beta-mannosyltransferase 2-like [Sesamum indicum]                   |
| c36764.graph_c1 | 0.32280271    | 0             | 0             | 13.8420579     | 13.3454079     | 17.4211113     | 2.7E-14   | 6.0529   | up        | PREDICTED: probable small nuclear ribonucleoprotein F isoform X2 [Nicotiana tomentosiformis] |
| c36764.graph_c2 | 2.20539106    | 0.36793324    | 0             | 10.1514816     | 13.0251355     | 8.28352606     | 0.0002241 | 2.54789  | up        | hypothetical protein MIMGU_mgv1a01/211mg [Erythranthe outtata]                               |
| c36767.graph_c0 | 77.8982265    | 71.4447157    | 75.248726     | 18.3612828     | 18.1155979     | 16.7091352     | 0         | -3.16892 | down      | PREDICTED: uncharacterized protein LOC105169073 [Sesamum indicum]                            |
| c36770.graph_c0 | 99.3520527    | 106.805938    | 103.460261    | 8.85919403     | 8.41906153     | 8.74745638     | 0         | -4.66324 | down      | PREDICTED: probable protein phosphatase 2C 49 [Sesamum indicum]                              |
| c36772.graph_c0 | 5.19648461    | 5.89882156    | 4.95663473    | 26.8267837     | 27.8430766     | 24.1144285     | 1.098E-15 | 1.20497  | up        | PREDICTED: protein CREG1 isoform X1 [Sesamum indicum]                                        |
| c36783.graph_c0 | 0.60219266    | 0.42698026    | 0.4191641     | 47.3048491     | 46.5977321     | 48.1835004     | 0         | 5.52982  | up        | PREDICTED: probable methyltransferase PM15 [Sesamum indicum]                                 |
| c36792.graph_c0 | 6.55267324    | 6.55923475    | 5.47328895    | 44.7372191     | 47.6498342     | 39.2254869     | 5.42E-33  | 1.73504  | up        | PREDICTED: nexose carrier protein HEX6-like [Sesamum indicum]                                |
| c36799.graph_c0 | 105.804709    | 112.891859    | 112.811027    | 22.640738      | 23.9512448     | 25.006276      | 1.11E-196 | -3.30196 | down      | PREDICTED: uncharacterized protein LOC105174622 [Sesamum indicum]                            |
| c36800.graph_c0 | 8.61204457    | 9.34408094    | 7.35208204    | 1.26934508     | 1.462265       | 2.07155044     | 4.178E-54 | -3.48383 | down      | hypothetical protein MIMGU_mgv1a0021//mg [Erythranthe outtata]                               |
| c36801.graph_c0 | 0.0635073     | 0.0211903     | 0.02720313    | 1.58471483     | 2.08376055     | 2.19703897     | 9.336E-19 | 4.63179  | up        | PREDICTED: BTB/POZ domain-containing protein At3g08570 [Sesamum indicum]                     |
| c36813.graph_c0 | 0.90059375    | 0.95300959    | 0.82664187    | 4.37610984     | 4.47466869     | 4.05919398     | 3.919E-06 | 1.17835  | up        | PREDICTED: WPP domain-interacting tail-anchored protein 2-like [Sesamum indicum]             |
| c36814.graph_c0 | 32.9132465    | 32.54531      | 36.2593907    | 20.3753225     | 18.8987424     | 19.4762848     | 6.327E-43 | -1.88378 | down      | PREDICTED: uncharacterized protein At5g19025-like isoform X2 [Sesamum indicum]               |
| c36816.graph_c0 | 1.27391533    | 0.7847329     | 0.62962755    | 3.27617066     | 5.2730901      | 4.7073828      | 0.0049456 | 1.21951  | up        | -                                                                                            |
| c36816.graph_c1 | 1.39785011    | 1.2126832     | 0.71851709    | 6.70526605     | 5.13691951     | 6.24518166     | 0.0006967 | 1.35947  | up        | PREDICTED: uncharacterized protein LOC105168668 [Sesamum indicum]                            |
| c36825.graph_c0 | 0             | 0.13483276    | 0.1730921     | 2.59428747     | 3.44730323     | 2.87581231     | 5.9E-11   | 3.74635  | up        | PREDICTED: transcription factor bHLH104 [Sesamum indicum]                                    |

| #ID             | 0 h-1<br>FPKM | 0 h-2<br>FPKM | 0 h-3<br>FPKM | 28 h-1<br>FPKM | 28 h-2<br>FPKM | 28 h-3<br>FPKM | FDR       | log2FC   | regulated | nr_annotation                                                                                                         |
|-----------------|---------------|---------------|---------------|----------------|----------------|----------------|-----------|----------|-----------|-----------------------------------------------------------------------------------------------------------------------|
| c36829.graph_c0 | 77.2286372    | 76.2254546    | 76.291389     | 46.0731209     | 45.2702709     | 46.9650145     | 1.203E-81 | -1.82242 | down      | PREDICTED: transcription factor ILR3-like [Sesamum indicum]                                                           |
| c36831.graph_c0 | 0.41742301    | 0.64997489    | 0.65560623    | 3.23606016     | 3.77406776     | 3.63082316     | 2.67E-05  | 1.53176  | up        | PREDICTED: 1-aminocyclopropane-1-carboxylate oxidase 5-like [Sesamum indicum]                                         |
| c36843.graph_c0 | 2.24591195    | 1.54040654    | 1.33615082    | 0.75570179     | 0.90067278     | 0.51798305     | 9.625E-08 | -2.32311 | down      | --                                                                                                                    |
| c36851.graph_c0 | 1.51207359    | 2.09949261    | 1.5669955     | 8.72082989     | 11.010925      | 8.36000165     | 3.35E-08  | 1.34856  | up        | PREDICTED: serine/threonine-protein kinase D6PKL2 [Sesamum indicum]                                                   |
| c36851.graph_c1 | 0             | 1.18320614    | 1.32907752    | 5.36929473     | 6.88411701     | 6.30907295     | 0.0001075 | 1.77771  | up        | PREDICTED: serine/threonine-protein kinase D6PKL2 [Sesamum indicum]                                                   |
| c36852.graph_c0 | 1.28556562    | 0.7218931     | 0.68497674    | 11.2576778     | 9.62964715     | 9.61386948     | 3.997E-28 | 2.41821  | up        | PREDICTED: probable polygalacturonase isoform X2 [Sesamum indicum]                                                    |
| c36853.graph_c0 | 171.511192    | 167.237817    | 150.169434    | 40.4281122     | 35.4803076     | 43.4540103     | 0         | -3.12234 | down      | PREDICTED: uncharacterized protein LOC105157533 [Sesamum indicum]                                                     |
| c36854.graph_c0 | 0.294792      | 0.20656103    | 0.35987842    | 7.670262       | 8.23131821     | 7.25539533     | 7.195E-73 | 3.65392  | up        | PREDICTED: aldehyde dehydrogenase 22A1 [Sesamum indicum]                                                              |
| c36865.graph_c0 | 0             | 0.09257952    | 0             | 10.5533753     | 9.80182425     | 9.76332046     | 2.424E-47 | 7.26395  | up        | PREDICTED: cinnamoyl-CoA reductase 1-like [Sesamum indicum]                                                           |
| c36866.graph_c0 | 0.87074821    | 0.87162013    | 1.35045198    | 7.92159605     | 9.06372152     | 7.35430998     | 2.921E-18 | 1.87875  | up        | PREDICTED: adenine/guanine permease AZG1 [Sesamum indicum]                                                            |
| c36868.graph_c0 | 5.85884804    | 1.90060202    | 2.43990564    | 0              | 0              | 0.06434514     | 8.829E-07 | -8.37457 | down      | PREDICTED: ribulose biphosphate carboxylase/oxygenase activase 2, chloroplastic-like isoform X2 [Phoenix dactylifera] |
| c36878.graph_c0 | 6.97047104    | 8.00166389    | 6.20439       | 34.6725618     | 35.3976838     | 33.48834       | 1.343E-28 | 1.20101  | up        | PREDICTED: transcription factor bHLH143-like [Sesamum indicum]                                                        |
| c36881.graph_c0 | 3.71753715    | 3.63794792    | 2.95900105    | 51.8802165     | 56.8378377     | 52.5512097     | 2.48E-160 | 2.87882  | up        | PREDICTED: 65-kDa microtubule-associated protein 1 [Sesamum indicum]                                                  |
| c36885.graph_c0 | 20.9165267    | 22.1464593    | 16.2259053    | 11.6708353     | 17.8149669     | 11.8512256     | 2.196E-11 | -1.60892 | down      | PREDICTED: uncharacterized protein LOC105173633 [Sesamum indicum]                                                     |
| c36890.graph_c0 | 25.8125898    | 27.6692356    | 24.5228884    | 13.0921798     | 13.8591161     | 13.3231911     | 7.24E-99  | -2.04348 | down      | PREDICTED: uncharacterized protein LOC105180144 isoform X2 [Sesamum indicum]                                          |
| c36891.graph_c0 | 0             | 0.17453754    | 0             | 0.6843203      | 0.77806742     | 0.70317009     | 3.058E-05 | 2.55116  | up        | PREDICTED: guanosine nucleotide diphosphate dissociation inhibitor At5g09550 [Nicotiana glauca]                       |
| c36892.graph_c0 | 2.12702127    | 2.23053931    | 2.21267672    | 19.6551007     | 18.6107853     | 18.8616409     | 4.662E-14 | 2.02922  | up        | PREDICTED: uncharacterized protein At1g76660-like [Sesamum indicum]                                                   |
| c36892.graph_c1 | 4.15314489    | 3.34391814    | 2.78449858    | 32.9408228     | 30.1572102     | 29.4495883     | 2.097E-24 | 2.084    | up        | PREDICTED: uncharacterized protein At1g76660-like [Sesamum indicum]                                                   |
| c36897.graph_c0 | 0.54051123    | 0.59023906    | 0.50514788    | 3.05344167     | 3.07942435     | 2.30216484     | 3.362E-05 | 1.27558  | up        | PREDICTED: probable LRR receptor-like serine/threonine-protein kinase At2g24230 [Sesamum indicum]                     |
| c36900.graph_c1 | 0.09710944    | 0             | 0             | 1.27041448     | 1.52942022     | 1.06544362     | 1.079E-10 | 4.2545   | up        | PREDICTED: probable LRR receptor-like serine/threonine-protein kinase At1g06840 [Sesamum indicum]                     |
| c36904.graph_c0 | 15.496594     | 15.6374849    | 15.348648     | 8.30023786     | 7.86046069     | 8.25851334     | 8.27E-121 | -2.01892 | down      | PREDICTED: LOW QUALITY PROTEIN: U-box domain-containing protein 17-like [Sesamum indicum]                             |

| #ID             | 0 h-1<br>FPKM | 0 h-2<br>FPKM | 0 h-3<br>FPKM | 28 h-1<br>FPKM | 28 h-2<br>FPKM | 28 h-3<br>FPKM | FDR       | log2FC   | regulated | nr_annotation                                                                      |
|-----------------|---------------|---------------|---------------|----------------|----------------|----------------|-----------|----------|-----------|------------------------------------------------------------------------------------|
| c36905.graph_c0 | 3.06531597    | 3.42937193    | 3.01221652    | 15.5949778     | 16.5656504     | 14.9353836     | 2.578E-09 | 1.21816  | up        | PREDICTED: outer envelope pore protein 24A, chloroplastic-like [Sesamum indicum]   |
| c36911.graph_c0 | 0.97667465    | 0.81471053    | 0.69725866    | 5.48155385     | 5.19857598     | 5.69571125     | 1.687E-06 | 1.63189  | up        | -                                                                                  |
| c36918.graph_c0 | 9.2002345     | 9.91016595    | 9.76654983    | 47.0247857     | 49.7432784     | 52.2497558     | 9.04E-18  | 1.2767   | up        | PREDICTED: probable small nuclear ribonucleoprotein F isoform X1 [Sesamum indicum] |
| c36920.graph_c0 | 0.25863176    | 0.17259383    | 0.08308801    | 1.1591611      | 1.15976123     | 1.31654321     | 6.335E-05 | 1.74377  | up        | hypothetical protein MIMGU_mgv1a002/41mg [Erythranthe outtata]                     |
| c36922.graph_c0 | 3.13179653    | 3.71073649    | 2.62823349    | 27.406965      | 29.9048149     | 26.1164394     | 6.548E-30 | 2.05059  | up        | PREDICTED: probable inactive receptor kinase At1g27190 [Sesamum indicum]           |
| c36925.graph_c0 | 25.5276409    | 29.5790905    | 24.1902797    | 7.42945652     | 9.53063766     | 6.98995249     | 5.197E-55 | -2.81779 | down      | PREDICTED: protein ECERIFERUM 1-like [Sesamum indicum]                             |
| c36926.graph_c0 | 4.22277186    | 4.93941611    | 5.36545791    | 126.28083      | 129.21408      | 124.710968     | 2.97E-260 | 3.6165   | up        | hypothetical protein CICLE_v10008112mg [Citrus clementina]                         |
| c36926.graph_c1 | 3.65784063    | 3.50230761    | 3.47426046    | 87.2680698     | 89.6487498     | 82.1509115     | 8.062E-72 | 3.51616  | up        | PREDICTED: serine carboxypeptidase II-2 [Sesamum indicum]                          |
| c36930.graph_c0 | 19.5663794    | 22.4875976    | 16.451967     | 136.062557     | 143.142082     | 134.520456     | 1.439E-30 | 1.73383  | up        | PREDICTED: protein transport protein Sec61 subunit beta-like [Vitis vinifera]      |
| c36938.graph_c0 | 71.2579824    | 67.6811949    | 61.30252      | 49.8922461     | 52.4727337     | 49.9056627     | 1.523E-68 | -1.48398 | down      | PREDICTED: uncharacterized protein LOC105174627 [Sesamum indicum]                  |
| c36942.graph_c0 | 2.08721367    | 1.8716679     | 1.89985781    | 1.51697487     | 1.48382658     | 1.46993394     | 2.408E-06 | -1.47975 | down      | -                                                                                  |
| c36943.graph_c0 | 23.1671247    | 22.1223476    | 23.6598502    | 17.9011684     | 23.5044742     | 20.7357262     | 1.087E-30 | -1.24119 | down      | PREDICTED: probable protein phosphatase 2C 24 [Sesamum indicum]                    |
| c36948.graph_c0 | 17.9822936    | 18.579709     | 17.9012302    | 18.3981638     | 17.0423061     | 17.7589865     | 1.878E-26 | -1.12418 | down      | PREDICTED: mitochondrial ribosome-associated GTPase 1 [Sesamum indicum]            |
| c36949.graph_c0 | 64.2194328    | 65.8768922    | 56.4479945    | 30.5956777     | 26.5806038     | 26.0512937     | 2.29E-104 | -2.25349 | down      | PREDICTED: probable receptor-like protein kinase At5g47070 [Sesamum indicum]       |
| c36951.graph_c0 | 13.2609844    | 13.3270437    | 13.9918242    | 113.088504     | 116.087225     | 104.490433     | 3.24E-122 | 1.94785  | up        | PREDICTED: mechanosensitive ion channel protein 8-like [Sesamum indicum]           |
| c36954.graph_c0 | 34.8819259    | 33.943078     | 34.1691267    | 1.27938293     | 0.75997554     | 0.74176533     | 0         | -6.30204 | down      | PREDICTED: heat stress transcription factor B-2b [Sesamum indicum]                 |
| c36959.graph_c0 | 3.43120575    | 3.00193083    | 2.96842214    | 20.8436856     | 19.4226977     | 19.6840966     | 1.044E-55 | 1.58378  | up        | PREDICTED: protein PIR [Sesamum indicum]                                           |
| c36972.graph_c0 | 0.03841162    | 0             | 0             | 153.740826     | 162.180205     | 151.261369     | 0         | 12.511   | up        | chalcone synthase [Misopates orontium]                                             |
| c36976.graph_c0 | 12.0267499    | 10.9337829    | 13.7376442    | 2.36470753     | 3.12640988     | 2.30860708     | 1.393E-35 | -3.32797 | down      | hypothetical protein MIMGU_mgv1a008959mg [Erythranthe outtata]                     |
| c36993.graph_c0 | 3.63666985    | 1.96694246    | 2.78888379    | 0              | 0              | 0              | 2.166E-26 | -Inf     | down      | --                                                                                 |
| c37003.graph_c0 | 49.5921483    | 54.221855     | 49.1235695    | 37.1160044     | 32.9311344     | 34.5316984     | 1.968E-64 | -1.63847 | down      | PREDICTED: BTB/POZ and MATH domain-containing protein 2-like [Sesamum indicum]     |
| c37003.graph_c1 | 29.1925526    | 28.1356651    | 28.483767     | 21.1794268     | 21.1913084     | 22.2156445     | 6.229E-48 | -1.50005 | down      | PREDICTED: BTB/POZ and MATH domain-containing protein 2-like [Sesamum indicum]     |
| c37013.graph_c0 | 3.75058623    | 1.62688148    | 2.4098259     | 0              | 0              | 0              | 2.056E-13 | -Inf     | down      | -                                                                                  |



| #ID             | 0 h-1<br>FPKM | 0 h-2<br>FPKM | 0 h-3<br>FPKM | 28 h-1<br>FPKM | 28 h-2<br>FPKM | 28 h-3<br>FPKM | FDR       | log2FC   | regulated | nr_annotation                                                                               |
|-----------------|---------------|---------------|---------------|----------------|----------------|----------------|-----------|----------|-----------|---------------------------------------------------------------------------------------------|
| c37020.graph_c0 | 0.28393242    | 0.21316255    | 0.2736483     | 6.86148475     | 6.98715496     | 5.5147213      | 4.774E-15 | 3.55904  | up        | PREDICTED: 7-deoxyloganetin glucosyltransferase-like [Sesamum indicum]                      |
| c37021.graph_c0 | 1.83691161    | 1.99198025    | 1.34885951    | 16.3226584     | 15.971962      | 14.8365282     | 5.513E-49 | 2.09941  | up        | PREDICTED: putative late blight resistance protein homolog R1B-16 [Sesamum indicum]         |
| c37022.graph_c0 | 18.4447141    | 16.2284467    | 14.2759575    | 15.0667136     | 15.1037392     | 17.0859459     | 9.618E-15 | -1.13769 | down      | PREDICTED: protein OSB4, chloroplastic-like [Sesamum indicum]                               |
| c37023.graph_c0 | 0.26600159    | 0.17751197    | 0.11394086    | 5.21986746     | 4.74214382     | 6.25759182     | 1.372E-19 | 3.78299  | up        | PREDICTED: bifunctional riboflavin kinase/FMN phosphatase-like isoform X2 [Sesamum indicum] |
| c37025.graph_c0 | 9.5134281     | 7.9357953     | 8.61316101    | 7.1762102      | 6.2902641      | 6.58235221     | 2.936E-13 | -1.46814 | down      | PREDICTED: syntaxin-51-like [Sesamum indicum]                                               |
| c37038.graph_c0 | 0.25122182    | 0.12573669    | 0.08070749    | 1.91715896     | 1.85465871     | 1.22916047     | 4.161E-06 | 2.37003  | up        | -                                                                                           |
| c37038.graph_c1 | 0.72828745    | 0.24300557    | 0.10398647    | 4.58739769     | 3.71717051     | 3.95923746     | 5.236E-10 | 2.4405   | up        | unnamed protein product [Coffea canephora]                                                  |
| c37039.graph_c0 | 2.75929989    | 1.49611741    | 1.9945179     | 0              | 0              | 0              | 2.569E-20 | -Inf     | down      | hypothetical protein POPTR_0005s04730g [Populus trichocarpa]                                |
| c37041.graph_c0 | 67.1090667    | 63.5866948    | 62.1199475    | 57.9810473     | 66.1651419     | 63.8560919     | 1.234E-41 | -1.12613 | down      | hypothetical protein JCGZ_06000 [Jatropha curcas]                                           |
| c37048.graph_c0 | 1.00423355    | 1.03990256    | 1.06798334    | 5.71312941     | 6.24918747     | 5.70924674     | 4.315E-08 | 1.41389  | up        | PREDICTED: mannose-6-phosphate isomerase 2-like [Sesamum indicum]                           |
| c37049.graph_c0 | 30.3509647    | 31.4121526    | 31.4106933    | 14.1807254     | 15.8270004     | 17.2606062     | 6.284E-84 | -2.06936 | down      | PREDICTED: uncharacterized protein LOC105155538 isoform X3 [Sesamum indicum]                |
| c37051.graph_c0 | 1.56493984    | 1.38221196    | 0.94635748    | 10.6379348     | 10.5111952     | 10.5912628     | 8.399E-09 | 1.94262  | up        | PREDICTED: transcription repressor OFP1 [Sesamum indicum]                                   |
| c37063.graph_c0 | 0.17172866    | 0.34380124    | 0.1765425     | 28.1324899     | 33.1768172     | 29.4535984     | 5.2E-129  | 5.94607  | up        | PREDICTED: rascicin-like arabinogalactan protein 8 [Sesamum indicum]                        |
| c37064.graph_c0 | 1.53315439    | 0.98902219    | 0.83184706    | 30.0857699     | 35.1239776     | 27.9038638     | 1.068E-54 | 3.71058  | up        | hypothetical protein MIMGU_mgv1a00/856mg [Erythranthe guttata]                              |
| c37065.graph_c0 | 1.91116503    | 1.70810605    | 1.66651899    | 0              | 0.04479136     | 0.08095943     | 1.94E-27  | -6.47678 | down      | --                                                                                          |
| c37067.graph_c0 | 8.36272045    | 6.4243283     | 6.78940923    | 32.9341546     | 31.5231934     | 29.8728168     | 3.383E-21 | 1.03953  | up        | PREDICTED: polyadenylate-binding protein-interacting protein 8-like [Sesamum indicum]       |
| c37069.graph_c0 | 13.0820354    | 13.3908317    | 12.6353145    | 11.3481959     | 10.5786712     | 11.5124762     | 1.504E-25 | -1.31565 | down      | PREDICTED: peptide chain release factor APG3, chloroplastic isoform X2 [Sesamum indicum]    |
| c37074.graph_c0 | 10.3307979    | 11.0275997    | 11.0013115    | 7.1064177      | 6.63418101     | 6.5072269      | 3.696E-58 | -1.76782 | down      | PREDICTED: uncharacterized protein LOC105165632 [Sesamum indicum]                           |
| c37077.graph_c0 | 0.05061038    | 0.10132213    | 0.06503635    | 4.78183363     | 4.18469981     | 3.87192229     | 5.053E-18 | 4.79513  | up        | hypothetical protein MIMGU_mgv1a0032972mg, partial [Erythranthe guttata]                    |
| c37078.graph_c0 | 45.1292829    | 50.4367324    | 43.3387915    | 1114.34737     | 1380.26684     | 1033.4789      | 4.792E-40 | 3.57595  | up        | 3-hydroxy-3-methylglutaryl-coenzyme A reductase [Andrographis paniculata]                   |
| c37079.graph_c0 | 19.780804     | 20.3681449    | 23.3953013    | 146.467074     | 147.748462     | 140.064159     | 8.525E-79 | 1.6798   | up        | PREDICTED: translocon-associated protein subunit beta [Sesamum indicum]                     |
| c37096.graph_c0 | 9.22197731    | 9.32445629    | 8.25951324    | 9.27514904     | 8.55797513     | 9.28101391     | 5.693E-07 | -1.07231 | down      | -                                                                                           |
| c37097.graph_c0 | 11.8023746    | 12.0603219    | 9.98462475    | 5.36118614     | 5.29244228     | 5.30795005     | 4.847E-44 | -2.17277 | down      | PREDICTED: LOW QUALITY PROTEIN: transcription factor bHLH96-like [Sesamum indicum]          |

| #ID             | 0 h-1<br>FPKM | 0 h-2<br>FPKM | 0 h-3<br>FPKM | 28 h-1<br>FPKM | 28 h-2<br>FPKM | 28 h-3<br>FPKM | FDR       | log2FC   | regulated | nr_annotation                                                                                      |
|-----------------|---------------|---------------|---------------|----------------|----------------|----------------|-----------|----------|-----------|----------------------------------------------------------------------------------------------------|
| c37104.graph_c0 | 13.75557      | 13.6207541    | 12.6532876    | 90.0611326     | 88.6442505     | 86.2541347     | 5.16E-92  | 1.63701  | up        | PREDICTED: calcium-transporting ATPase 4, plasma membrane-type-like [Sesamum indicum]              |
| c37113.graph_c0 | 0.10534813    | 0.08436289    | 0             | 3.55268144     | 5.06048361     | 3.93608663     | 3.74E-24  | 4.97784  | up        | PREDICTED: LOW QUALITY PROTEIN: respiratory burst oxidase homolog protein C-like [Sesamum indicum] |
| c37117.graph_c0 | 0.38044831    | 0.598446      | 0.41904955    | 4.1081135      | 3.78057288     | 4.31916411     | 3.4E-07   | 2.03667  | up        | PREDICTED: psbP-like protein 1, chloroplastic [Sesamum indicum]                                    |
| c37119.graph_c0 | 2.57804928    | 3.10482143    | 1.91526765    | 12.266954      | 11.6310265     | 13.5931714     | 2.35E-10  | 1.21708  | up        | PREDICTED: uncharacterized protein LOC105157824 isoform X3 [Sesamum indicum]                       |
| c37122.graph_c0 | 15.3210229    | 14.9801652    | 16.1823653    | 0.18678452     | 0.23351388     | 0.30482929     | 0         | -7.09199 | down      | PREDICTED: uncharacterized protein LOC105166759 [Sesamum indicum]                                  |
| c37123.graph_c0 | 0.41352759    | 0.11826905    | 0             | 4.03594999     | 3.56655072     | 2.83784554     | 4.453E-10 | 3.22996  | up        | PREDICTED: phospholipase D alpha 1-like [Sesamum indicum]                                          |
| c37127.graph_c0 | 0.46082408    | 0.49011587    | 0.55516611    | 3.72603267     | 3.98796893     | 3.689489       | 1.905E-09 | 1.82741  | up        | PREDICTED: uncharacterized protein LOC105170631 [Sesamum indicum]                                  |
| c37133.graph_c0 | 6.90883624    | 6.47346778    | 6.29727691    | 6.36420881     | 6.74792966     | 7.05123925     | 2.556E-10 | -1.05416 | down      | PREDICTED: uncharacterized protein LOC105173649 [Sesamum indicum]                                  |
| c37135.graph_c0 | 0.14802243    | 0.06350171    | 0             | 0.95286783     | 1.01299311     | 0.91548166     | 1.829E-07 | 2.70169  | up        | hypothetical protein MIMGU_mgv1a001054mg [Erythranthe guttata]                                     |
| c37136.graph_c0 | 361.428755    | 351.449907    | 357.726262    | 60.1964355     | 65.6799714     | 62.4208397     | 0         | -3.59795 | down      | PREDICTED: uncharacterized protein LOC105171465 [Sesamum indicum]                                  |
| c37142.graph_c0 | 0.88301914    | 0.49105742    | 0.50431758    | 0              | 0              | 0              | 2.928E-16 | -Inf     | down      | predicted protein [Hordeum vulgare subsp. vulgare]                                                 |
| c37145.graph_c0 | 0.84300135    | 0.25315365    | 0.37915154    | 8.11812297     | 8.98950478     | 8.54912506     | 5.486E-24 | 3.03873  | up        | PREDICTED: ACT domain-containing protein DS12, chloroplastic-like isoform X1 [Sesamum indicum]     |
| c37146.graph_c0 | 4.97232749    | 4.26087604    | 3.43685057    | 17.5491181     | 22.7913916     | 19.9942959     | 1.636E-08 | 1.16512  | up        | PREDICTED: arogenate dehydratase/prephenate dehydratase 6, chloroplastic-like [Sesamum indicum]    |
| c37147.graph_c0 | 7.1172503     | 7.96253917    | 8.37738132    | 8.25905491     | 5.84797727     | 7.16496271     | 1.127E-10 | -1.23308 | down      | conserved hypothetical protein [Ricinus communis]                                                  |
| c37156.graph_c0 | 1.58653351    | 0.68062379    | 1.45625598    | 32.5059705     | 28.0112528     | 33.9622495     | 4.099E-48 | 3.5747   | up        | hypothetical protein MIMGU_mgv1a016103mg [Erythranthe guttata]                                     |
| c37157.graph_c0 | 28.7792422    | 27.8442218    | 28.0461821    | 16.4326101     | 16.9667224     | 14.9527998     | 9.979E-89 | -1.89912 | down      | PREDICTED: probable protein phosphatase 2C 8 isoform X1 [Sesamum indicum]                          |
| c37160.graph_c0 | 0.23686964    | 0.23710683    | 0.25365572    | 1.72155488     | 1.83937646     | 1.73255549     | 6.959E-05 | 1.77127  | up        | hypothetical protein MIMGU_mgv1a001966mg [Erythranthe guttata]                                     |
| c37161.graph_c0 | 0.06087761    | 0             | 0             | 1.2388739      | 1.23843558     | 1.66078233     | 3.615E-10 | 5.02949  | up        | hypothetical protein MIMGU_mgv1a014011mg [Erythranthe guttata]                                     |
| c37167.graph_c0 | 0.56353449    | 0.28204939    | 0.99572568    | 3.73735929     | 3.7442916      | 4.09405694     | 7.71E-05  | 1.55144  | up        | -                                                                                                  |
| c37173.graph_c0 | 1.89470668    | 1.97788697    | 1.80868859    | 49.1414374     | 43.7484316     | 63.1021676     | 5.118E-22 | 3.69093  | up        | PREDICTED: vignain-like [Sesamum indicum]                                                          |
| c37180.graph_c1 | 3.05762296    | 1.70038039    | 2.61944437    | 14.3212488     | 18.9502296     | 17.7305162     | 7.191E-05 | 1.69963  | up        | PREDICTED: LOW QUALITY PROTEIN: protein transport protein SEC31 homolog B-like [Sesamum indicum]   |
| c37182.graph_c0 | 326.859368    | 311.578992    | 348.117387    | 124.445863     | 123.159833     | 124.692672     | 6.507E-76 | -2.49745 | down      | hypothetical protein CISIN_1g033114mg [Citrus sinensis]                                            |
| c37183.graph_c0 | 0.03642495    | 0             | 0.02340375    | 5.12261187     | 4.69694735     | 4.27721898     | 6.849E-55 | 6.79255  | up        | hypothetical protein MIMGU_mgv1a024814mg, partial [Erythranthe guttata]                            |

| #ID             | 0 h-1<br>FPKM | 0 h-2<br>FPKM | 0 h-3<br>FPKM | 28 h-1<br>FPKM | 28 h-2<br>FPKM | 28 h-3<br>FPKM | FDR       | log2FC   | regulated | nr_annotation                                                                                     |
|-----------------|---------------|---------------|---------------|----------------|----------------|----------------|-----------|----------|-----------|---------------------------------------------------------------------------------------------------|
| c37190.graph_c0 | 25.8032818    | 26.6355598    | 32.1821264    | 17.6829938     | 17.8391172     | 16.6816047     | 1.065E-13 | -1.79066 | down      | PREDICTED: zinc finger CCCH domain-containing protein 30-like [Sesamum indicum]                   |
| c37191.graph_c0 | 13.4873583    | 11.6429468    | 12.9590903    | 1.96350458     | 1.39392852     | 1.54105089     | 1.19E-143 | -4.04949 | down      | PREDICTED: kinesin-3-like [Sesamum indicum]                                                       |
| c37195.graph_c0 | 10.7141459    | 10.3123793    | 10.061305     | 6.24669782     | 6.25828463     | 6.59850057     | 4.317E-25 | -1.79208 | down      | PREDICTED: ethylene-responsive transcription factor ERF069-like [Sesamum indicum]                 |
| c37196.graph_c0 | 2.91575648    | 3.82447223    | 1.67962803    | 13.5187475     | 12.6350266     | 11.9554222     | 4.45E-05  | 1.09423  | up        | PREDICTED: protein IWS1 homolog A-like isoform X2 [Sesamum indicum]                               |
| c37196.graph_c1 | 2.9323532     | 2.88906448    | 2.46267533    | 12.0489299     | 12.7730397     | 11.1874705     | 6.432E-13 | 1.0311   | up        | hypothetical protein MIMGU_mgv1a00085/mg [Erythranthe                                             |
| c37209.graph_c0 | 2.32529435    | 2.58888656    | 2.896623      | 12.0715038     | 13.1883177     | 11.5951497     | 5.663E-16 | 1.14464  | up        | hypothetical protein MIMGU_mgv1a002141/mg [Erythranthe                                            |
| c37212.graph_c1 | 5.43275581    | 6.3861383     | 4.67555377    | 46.621228      | 58.7754407     | 47.3240938     | 1.709E-22 | 2.12193  | up        | Pollen Ole e 1 allergen and extensin family protein [1 neobroma cacao]                            |
| c37217.graph_c0 | 12.9364216    | 13.1049235    | 11.8812845    | 12.7337977     | 14.3526618     | 13.1553778     | 3.78E-17  | -1.004   | down      | PREDICTED: IAA-amino acid hydrolase ILR1-like 4 isoform X2 [Sesamum indicum]                      |
| c37229.graph_c1 | 27.085447     | 30.0051519    | 25.7718636    | 18.4003439     | 18.4534719     | 17.8281561     | 2.573E-59 | -1.68941 | down      | PREDICTED: NAC domain-containing protein 100-like [Sesamum indicum]                               |
| c37234.graph_c0 | 22.8842419    | 19.0063006    | 21.309534     | 105.939469     | 115.023495     | 113.933324     | 1.617E-39 | 1.3157   | up        | PREDICTED: 60S ribosomal protein L21-1-like [Sesamum indicum]                                     |
| c37236.graph_c0 | 0             | 0             | 0             | 9.15873645     | 11.4394478     | 22.54492       | 2.273E-06 | Inf      | up        | -                                                                                                 |
| c37239.graph_c0 | 4.89723339    | 4.87428418    | 4.7198541     | 25.8250105     | 26.9877512     | 24.2578751     | 1.667E-30 | 1.32047  | up        | BnaC09g00400D [Brassica napus]                                                                    |
| c37240.graph_c0 | 1.34908544    | 1.10035554    | 1.6052113     | 10.6766375     | 10.6236764     | 11.2901043     | 3.807E-15 | 1.91346  | up        | PREDICTED: uncharacterized protein LOC105173599 [Sesamum indicum]                                 |
| c37244.graph_c0 | 0.32655398    | 0.14009185    | 0.05994783    | 1.22059311     | 0.94901431     | 1.68765652     | 0.0081468 | 1.80201  | up        | PREDICTED: F-box/kelch-repeat protein At1g57790-like [Sesamum indicum]                            |
| c37245.graph_c0 | 0.27362275    | 0.06847418    | 0.08790402    | 2.03839121     | 1.88536581     | 2.3124074      | 2.083E-07 | 2.78176  | up        | PREDICTED: secretory carrier-associated membrane protein 2 [Sesamum indicum]                      |
| c37251.graph_c0 | 19.3012341    | 22.3646369    | 19.4594707    | 12.1786718     | 12.2179987     | 12.4773304     | 1.093E-45 | -1.81927 | down      | PREDICTED: uncharacterized protein LOC105176792 [Sesamum indicum]                                 |
| c37255.graph_c0 | 0.07245576    | 0.07252831    | 0             | 1.84311502     | 1.37887547     | 1.54693729     | 1.305E-08 | 3.96944  | up        | PREDICTED: probable WRKY transcription factor 57 isoform X1 [Nicotiana tomentosiformis]           |
| c37256.graph_c0 | 6.79662951    | 3.25381689    | 5.69604653    | 0              | 0              | 0              | 4.895E-16 | -Inf     | down      | predicted protein [Hordeum vulgare subsp. vulgare]                                                |
| c37260.graph_c0 | 2.69893719    | 2.2403842     | 1.35345996    | 0.33490254     | 0.25918765     | 0.11711903     | 3.633E-11 | -4.2313  | down      | PREDICTED: uncharacterized protein LOC105156178 [Sesamum indicum]                                 |
| c37266.graph_c0 | 2.61480383    | 2.7076781     | 2.08559573    | 12.2544605     | 12.8988721     | 12.2454256     | 1.003E-05 | 1.24808  | up        | PREDICTED: protein TRANSPORT INHIBITOR RESPONSE 1-like [Sesamum indicum]                          |
| c37269.graph_c0 | 1.99189318    | 1.46489713    | 1.72385373    | 13.4133511     | 13.6848947     | 13.524777      | 2.769E-21 | 1.8817   | up        | PREDICTED: GPN-loop GTPase 2 isoform X1 [Sesamum indicum]                                         |
| c37276.graph_c1 | 0.06086077    | 0.09138256    | 0.03910425    | 1.34911424     | 1.39784684     | 1.28133608     | 1.822E-09 | 3.31098  | up        | PREDICTED: AT-rich interactive domain-containing protein 2 isoform X1 [Nicotiana tomentosiformis] |

| #ID             | 0 h-1<br>FPKM | 0 h-2<br>FPKM | 0 h-3<br>FPKM | 28 h-1<br>FPKM | 28 h-2<br>FPKM | 28 h-3<br>FPKM | FDR       | log2FC   | regulated | nr_annotation                                                                          |
|-----------------|---------------|---------------|---------------|----------------|----------------|----------------|-----------|----------|-----------|----------------------------------------------------------------------------------------|
| c37277.graph_c0 | 7.38132822    | 5.73881126    | 6.53840999    | 67.9182299     | 61.6529858     | 62.5608138     | 5.97E-105 | 2.19922  | up        | hypothetical protein MIMGU_mgv1a004994mg [Erythranthe outtata]                         |
| c37279.graph_c0 | 7.88963908    | 7.81352299    | 9.49136038    | 9.51623934     | 8.20672122     | 7.01852228     | 2.568E-07 | -1.12024 | down      | -                                                                                      |
| c37282.graph_c0 | 33.0854992    | 31.7422707    | 30.20305      | 17.3321095     | 20.4427399     | 18.5258723     | 9.696E-82 | -1.84494 | down      | hypothetical protein MIMGU_mgv1a011154mg [Erythranthe outtata]                         |
| c37288.graph_c0 | 6.72958949    | 5.9675081     | 7.00282908    | 123.445265     | 114.699602     | 111.814135     | 4.75E-222 | 3.05924  | up        | monodehydroascorbate reductase [Acanthus ebracteatus]                                  |
| c37289.graph_c0 | 6.93863421    | 6.50274307    | 7.77942656    | 5.26295423     | 5.82152591     | 5.37161178     | 1.746E-17 | -1.45942 | down      | PREDICTED: uncharacterized protein LOC105168518 isoform X1 [Sesamum indicum]           |
| c37290.graph_c0 | 85.4188277    | 79.5799022    | 85.7165954    | 59.6017354     | 63.7519682     | 68.2085045     | 2.7E-62   | -1.47861 | down      | hypothetical protein MIMGU_mgv1a012578mg [Erythranthe outtata]                         |
| c37293.graph_c0 | 3.2043211     | 1.98112131    | 2.66438084    | 20.0009875     | 16.0181002     | 16.2088573     | 1.8E-10   | 1.64463  | up        | PREDICTED: cytochrome P450 734A1 [Sesamum indicum]                                     |
| c37293.graph_c1 | 4.99997804    | 5.30329511    | 4.04232533    | 26.0634007     | 22.8591996     | 24.6451895     | 1.22E-23  | 1.27094  | up        | PREDICTED: BTB/POZ domain-containing protein At3g50780-like [Sesamum indicum]          |
| c37295.graph_c0 | 2.73084264    | 1.98259443    | 1.85102817    | 15.7472222     | 16.1284753     | 16.1776879     | 6.068E-30 | 1.78577  | up        | PREDICTED: ATP-dependent 6-phosphofructokinase 5, chloroplastic-like [Sesamum indicum] |
| c37299.graph_c0 | 1.65082269    | 2.06559468    | 1.25956493    | 11.39818       | 11.6794845     | 11.7484064     | 7.62E-13  | 1.72053  | up        | PREDICTED: peptide methionine sulfoxide reductase A5 isoform X1 [Sesamum indicum]      |
| c37303.graph_c0 | 21.0586751    | 20.390881     | 23.9659924    | 21.507481      | 21.6772898     | 20.3252664     | 2.687E-13 | -1.13537 | down      | PREDICTED: uncharacterized protein LOC105163935 [Sesamum indicum]                      |
| c37304.graph_c0 | 0             | 0.22251673    | 0.19043784    | 9.42445554     | 6.85614492     | 7.95394546     | 7.191E-22 | 4.77088  | up        | PREDICTED: uncharacterized protein LOC105169888 [Sesamum indicum]                      |
| c37307.graph_c0 | 0             | 0.03710522    | 0.04763398    | 0.72740393     | 0.70542774     | 0.79140756     | 7.936E-08 | 3.60552  | up        | PREDICTED: ferric reduction oxidase 1, chloroplastic [Sesamum indicum]                 |
| c37312.graph_c0 | 0.97957256    | 0.58833207    | 0.75527371    | 5.98036061     | 4.75688291     | 3.36947232     | 0.001366  | 1.51224  | up        | hypothetical protein JCGZ_14002 [Jatropha curcas]                                      |
| c37319.graph_c0 | 0.31052036    | 0.36411666    | 0.39903095    | 3.85597926     | 4.33160748     | 3.66208615     | 4.499E-38 | 2.37018  | up        | PREDICTED: sporulation-specific protein 15 [Sesamum indicum]                           |
| c37329.graph_c0 | 0.47381605    | 0.62022604    | 0.23418168    | 3.0728112      | 2.39177622     | 2.01023416     | 0.0011341 | 1.40909  | up        | PREDICTED: E3 ubiquitin-protein ligase KGLGZ-like [Sesamum indicum]                    |
| c37333.graph_c0 | 0.39916062    | 0.44656741    | 0.39224609    | 2.0136883      | 2.44990936     | 2.26977943     | 4.662E-05 | 1.35327  | up        | PREDICTED: uncharacterized protein LOC105172792, partial [Sesamum indicum]             |
| c37339.graph_c0 | 0.44937542    | 0.2249127     | 0.3849768     | 2.66726163     | 2.45743589     | 2.4873871      | 0.0001681 | 1.75518  | up        | PREDICTED: uncharacterized protein LOC105170136 [Sesamum indicum]                      |
| c37340.graph_c0 | 2.01715435    | 1.72126327    | 1.97596277    | 34.7767747     | 34.709445      | 34.4178473     | 9.11E-187 | 3.09375  | up        | PREDICTED: probable glucan 1,5-alpha-glucosidase [Sesamum indicum]                     |
| c37349.graph_c0 | 0.17787149    | 0.1780496     | 0             | 9.37250784     | 9.86318479     | 9.93346614     | 9.415E-61 | 5.28652  | up        | PREDICTED: uncharacterized protein LOC105169807 [Sesamum indicum]                      |
| c37350.graph_c0 | 0.07641185    | 0.03824418    | 0.14728837    | 2.27696331     | 3.18411362     | 2.76431687     | 2.854E-14 | 3.86985  | up        | PREDICTED: OTU domain-containing protein DDB_G0284757-like [Sesamum indicum]           |
| c37352.graph_c0 | 14.5202732    | 14.5348131    | 14.3065191    | 8.69684729     | 8.67229778     | 7.72223883     | 4.701E-68 | -1.88013 | down      | hypothetical protein MIMGU_mgv1a003689mg [Erythranthe outtata]                         |
| c37358.graph_c0 | 1381.26568    | 1564.69499    | 1419.82621    | 121.604139     | 125.879831     | 130.62801      | 3.97E-222 | -4.61966 | down      | hypothetical protein MIMGU_mgv1a011603mg [Erythranthe outtata]                         |

| #ID             | 0 h-1<br>FPKM | 0 h-2<br>FPKM | 0 h-3<br>FPKM | 28 h-1<br>FPKM | 28 h-2<br>FPKM | 28 h-3<br>FPKM | FDR       | log2FC   | regulated | nr_annotation                                                                             |
|-----------------|---------------|---------------|---------------|----------------|----------------|----------------|-----------|----------|-----------|-------------------------------------------------------------------------------------------|
| c37359.graph_c0 | 0.45962675    | 0.5981131     | 0.53157472    | 0.4676757      | 0.57307707     | 0.49065371     | 0.0028439 | -1.14561 | down      | PREDICTED: oxysterol-binding protein-related protein 1C-like isoform X1 [Sesamum indicum] |
| c37361.graph_c0 | 19.3089128    | 21.3015505    | 17.2130108    | 13.3968286     | 11.841775      | 13.1799962     | 8.372E-32 | -1.67832 | down      | PREDICTED: uncharacterized protein LOC105159352 [Sesamum indicum]                         |
| c37362.graph_c0 | 0.30367901    | 0.87817338    | 0.30351965    | 2.72211653     | 3.23280303     | 3.24178763     | 0.0001281 | 1.54344  | up        | PREDICTED: uncharacterized protein LOC105174401 isoform X2 [Sesamum indicum]              |
| c37364.graph_c0 | 8.08760645    | 7.47295843    | 7.46156527    | 3.59212685     | 3.22067296     | 3.30010164     | 3.498E-45 | -2.27657 | down      | PREDICTED: uncharacterized protein LOC105156132 [Sesamum indicum]                         |
| c37366.graph_c0 | 0.23917368    | 0.50542781    | 0.71714451    | 5.77502059     | 5.47588919     | 6.20961083     | 1.65E-21  | 2.47683  | up        | hypothetical protein MIMGU_mgv1a005275mg [Erythranthe outtata]                            |
| c37371.graph_c0 | 0             | 0             | 0             | 0.65932618     | 0.75558541     | 1.40708941     | 2.111E-05 | Inf      | up        | -                                                                                         |
| c37372.graph_c0 | 6.05579039    | 6.27681372    | 6.07100954    | 36.365463      | 34.1592614     | 31.4059609     | 4.626E-29 | 1.37856  | up        | PREDICTED: interactor of constitutive active ROPs 1-like [Sesamum indicum]                |
| c37374.graph_c0 | 1.58615318    | 2.64623578    | 1.92503243    | 1.02471732     | 0.86739719     | 0.41808048     | 7.864E-08 | -2.50866 | down      | -                                                                                         |
| c37384.graph_c0 | 9.63052192    | 9.59047385    | 8.10155385    | 2.59771837     | 1.88942744     | 1.44258516     | 5.676E-66 | -3.29399 | down      | hypothetical protein MIMGU_mgv1a022389mg [Erythranthe outtata]                            |
| c37384.graph_c1 | 14.7307393    | 15.3613949    | 11.3019379    | 6.839352       | 8.81166895     | 7.55561959     | 1.173E-17 | -1.92237 | down      | PREDICTED: ankyrin repeat-containing protein At5g02620-like [Sesamum indicum]             |
| c37387.graph_c0 | 0.04412318    | 0             | 0             | 15.1363192     | 12.1031166     | 11.9324311     | 9.022E-53 | 8.73477  | up        | hypothetical protein MIMGU_mgv1a011850mg [Erythranthe outtata]                            |
| c37388.graph_c0 | 4.53429769    | 4.52103874    | 4.93560174    | 4.18722534     | 4.23575277     | 4.68220157     | 3.498E-18 | -1.18556 | down      | PREDICTED: uncharacterized protein LOC105155378 [Sesamum indicum]                         |
| c37395.graph_c0 | 3.85326308    | 2.62985559    | 3.03847912    | 14.5118341     | 18.3899307     | 16.3080832     | 1.406E-07 | 1.28117  | up        | hypothetical protein MIMGU_mgv1a013530mg [Erythranthe outtata]                            |
| c37400.graph_c0 | 1.36499       | 1.58373179    | 1.47501021    | 7.55323639     | 6.53485502     | 6.01619403     | 7.196E-07 | 1.09246  | up        | PREDICTED: aspartic proteinase-like protein 2 [Sesamum indicum]                           |
| c37416.graph_c0 | 12.3354427    | 12.3477947    | 13.6618311    | 8.42687045     | 9.60200064     | 9.49055345     | 6.721E-33 | -1.57039 | down      | PREDICTED: rho GTPase-activating protein 2 [Sesamum indicum]                              |
| c37417.graph_c0 | 1.66005351    | 1.89091798    | 2.05967467    | 11.1914883     | 12.4338668     | 12.4930706     | 1.7E-11   | 1.59363  | up        | PREDICTED: uncharacterized protein LOC105162643 [Sesamum indicum]                         |
| c37423.graph_c0 | 0.86393071    | 0.95679536    | 1.0865642     | 11.7697824     | 12.351939      | 10.2363218     | 1.283E-49 | 2.46875  | up        | PREDICTED: vacuolar protein sorting-associated protein 18 homolog [Sesamum indicum]       |
| c37427.graph_c0 | 21.3741468    | 19.7314514    | 25.0251471    | 166.047685     | 158.497115     | 170.916246     | 1.566E-68 | 1.81269  | up        | hypothetical protein MIMGU_mgv1a021808mg [Erythranthe outtata]                            |
| c37428.graph_c0 | 0.9061252     | 0.73696395    | 0.83691736    | 0.10290103     | 0.13007397     | 0.25189919     | 3.471E-16 | -3.44083 | down      | -                                                                                         |
| c37430.graph_c0 | 6.22482527    | 6.54261141    | 4.89947749    | 28.9546696     | 27.1645766     | 29.025861      | 1.67E-11  | 1.18172  | up        | -                                                                                         |
| c37432.graph_c0 | 2.55203528    | 2.69919023    | 2.75351421    | 20.6828203     | 21.5816993     | 20.2895387     | 3.739E-50 | 1.87455  | up        | PREDICTED: uncharacterized protein LOC105168937 [Sesamum indicum]                         |
| c37434.graph_c0 | 8.20562597    | 7.76743817    | 5.38689184    | 5.96380166     | 5.56034354     | 6.50618321     | 6.023E-07 | -1.32925 | down      | PREDICTED: uncharacterized protein LOC105168847 isoform X2 [Sesamum indicum]              |
| c37435.graph_c1 | 1.38635072    | 1.51389702    | 0.97173576    | 12.3658983     | 13.3982961     | 12.6317761     | 1.398E-09 | 2.22369  | up        | PREDICTED: auxin efflux carrier component 2 [Sesamum indicum]                             |

| #ID             | 0 h-1<br>FPKM | 0 h-2<br>FPKM | 0 h-3<br>FPKM | 28 h-1<br>FPKM | 28 h-2<br>FPKM | 28 h-3<br>FPKM | FDR       | log2FC   | regulated | nr_annotation                                                                         |
|-----------------|---------------|---------------|---------------|----------------|----------------|----------------|-----------|----------|-----------|---------------------------------------------------------------------------------------|
| c37435.graph_c3 | 1.33209216    | 1.03232985    | 0.66262884    | 16.7709761     | 17.7086866     | 16.641139      | 6.987E-44 | 2.99519  | up        | PREDICTED: auxin efflux carrier component 2 [Sesamum indicum]                         |
| c37436.graph_c0 | 3.64172577    | 1.6004074     | 1.99745931    | 0              | 0              | 0              | 7.316E-13 | -Inf     | down      | --                                                                                    |
| c37439.graph_c1 | 0.83341551    | 1.48973224    | 1.22396792    | 9.1290897      | 9.53185661     | 9.63814551     | 2.046E-11 | 1.90282  | up        | hypothetical protein MIMGU_mgv1a015229mg [Erythranthe<br>outfata]                     |
| c37444.graph_c1 | 11.7362554    | 16.7731668    | 12.2919015    | 8.18470465     | 7.52357551     | 8.40866447     | 6.271E-09 | -1.84817 | down      | PREDICTED: E3 ubiquitin-protein ligase RNF170-like [Sesamum<br>indicum]               |
| c37447.graph_c0 | 18.5128669    | 21.2036997    | 16.6371415    | 18.261324      | 17.2325253     | 16.8465115     | 3.867E-15 | -1.19557 | down      | PREDICTED: uncharacterized protein LOC105157015 isoform X1<br>[Sesamum indicum]       |
| c37456.graph_c0 | 8.64740309    | 3.82864287    | 6.62461375    | 0              | 0.21825615     | 0              | 9.91E-13  | -7.54995 | down      | hypothetical protein TSTA_040370 [Talaromyces stipitatus ATCC<br>10500]               |
| c37460.graph_c0 | 1.10707358    | 1.07023071    | 0.69182856    | 14.2350669     | 13.2858401     | 13.2795808     | 1.24E-141 | 2.74495  | up        | PREDICTED: acetyl-CoA carboxylase 1-like isoform X1 [Sesamum<br>indicum]              |
| c37470.graph_c1 | 2.20763437    | 2.20984498    | 1.37792168    | 12.3316973     | 9.10617334     | 8.75330875     | 6.704E-05 | 1.29572  | up        | -                                                                                     |
| c37473.graph_c0 | 1.60810108    | 2.53734163    | 2.06647356    | 11.4498724     | 13.2178221     | 12.834505      | 3.149E-19 | 1.50174  | up        | PREDICTED: uncharacterized protein LOC105162786 [Sesamum<br>indicum]                  |
| c37475.graph_c0 | 0.35434448    | 0.1182331     | 0.75891114    | 4.80732981     | 5.58073039     | 4.34303563     | 2.302E-07 | 2.47405  | up        | PREDICTED: reticulon-like protein B8 [Sesamum indicum]                                |
| c37477.graph_c0 | 0.66450709    | 0.95618546    | 0.96065766    | 4.46737932     | 5.34182726     | 5.09855691     | 1.605E-06 | 1.43574  | up        | hypothetical protein MIMGU_mgv1a01055mg [Erythranthe<br>outfata]                      |
| c37479.graph_c0 | 1.39530165    | 1.54118492    | 1.73118966    | 0.97912833     | 0.88406108     | 0.9987009      | 9.069E-07 | -1.79847 | down      | hypothetical protein MIMGU_mgv1a0229/4mg [Erythranthe<br>outfata]                     |
| c37480.graph_c0 | 6.91765299    | 6.92457997    | 5.15808055    | 27.8386183     | 27.2092842     | 29.3764312     | 3.164E-16 | 1.06515  | up        | PREDICTED: 60S ribosomal protein L11-like [Sesamum indicum]                           |
| c37481.graph_c0 | 0.97053277    | 0.85720995    | 0.917039      | 3.98330895     | 5.11385094     | 4.2491523      | 5.19E-06  | 1.19099  | up        | PREDICTED: uncharacterized protein LOC105162739 [Sesamum<br>indicum]                  |
| c37483.graph_c0 | 59.6199521    | 57.8878846    | 61.5742993    | 360.961883     | 367.433401     | 373.015698     | 1.377E-82 | 1.52969  | up        | hypothetical protein MIMGU_mgv1a0165/9mg [Erythranthe<br>outfata]                     |
| c37485.graph_c0 | 44.8184972    | 50.0323316    | 45.5885568    | 27.9899978     | 28.7902953     | 30.2502097     | 9.05E-72  | -1.78051 | down      | PREDICTED: replication protein A 70 kDa DNA-binding subunit A<br>[Sesamum indicum]    |
| c37486.graph_c0 | 0.08022014    | 0.08030046    | 0.03436202    | 2.13779619     | 2.36891805     | 2.2201763      | 1.178E-15 | 4.02804  | up        | PREDICTED: nucleobase-ascorbate transporter 1 [Sesamum<br>indicum]                    |
| c37489.graph_c0 | 0.14161268    | 0.14175448    | 0.36395579    | 2.6760052      | 2.50911187     | 2.68750572     | 3.621E-07 | 2.50024  | up        | PREDICTED: CASP-like protein 3A1 [Sesamum indicum]                                    |
| c37490.graph_c0 | 0.76319402    | 0.51949161    | 0.54921134    | 3.21717311     | 3.78626395     | 3.15022438     | 1.197E-05 | 1.38291  | up        | PREDICTED: beta-hexosaminidase 3 [Sesamum indicum]                                    |
| c37493.graph_c0 | 0             | 0.06917437    | 0.08880288    | 3.89245621     | 3.87731247     | 4.13932207     | 5.502E-24 | 5.12738  | up        | PREDICTED: serine/threonine-protein kinase-like protein CCR1<br>[Sesamum indicum]     |
| c37495.graph_c0 | 0.73902028    | 0.69624499    | 0.81001292    | 8.89400376     | 8.47262556     | 8.98478118     | 2.304E-36 | 2.46113  | up        | PREDICTED: uncharacterized protein LOC105159731 [Sesamum<br>indicum]                  |
| c37499.graph_c0 | 0.67590827    | 0.9533699     | 0.59220606    | 3.39406489     | 3.68952364     | 3.15216156     | 0.0003151 | 1.11547  | up        | PREDICTED: uncharacterized protein LOC105178641 [Sesamum<br>indicum]                  |
| c37501.graph_c0 | 8.60699543    | 8.85493664    | 8.75609449    | 37.8806166     | 42.4787439     | 41.2964094     | 5.437E-19 | 1.12351  | up        | PREDICTED: DNA-directed RNA polymerases II and V subunit<br>8A-like [Sesamum indicum] |

| #ID             | 0 h-1<br>FPKM | 0 h-2<br>FPKM | 0 h-3<br>FPKM | 28 h-1<br>FPKM | 28 h-2<br>FPKM | 28 h-3<br>FPKM | FDR       | log2FC   | regulated | nr_annotation                                                                                                   |
|-----------------|---------------|---------------|---------------|----------------|----------------|----------------|-----------|----------|-----------|-----------------------------------------------------------------------------------------------------------------|
| c37503.graph_c0 | 0.0873203     | 0             | 0.05610502    | 306.245018     | 241.871512     | 298.986579     | 2.92E-149 | 11.4415  | up        | PREDICTED: WAT1-related protein At2g39510-like [Sesamum indicum]                                                |
| c37506.graph_c0 | 1.62265211    | 0.84744884    | 1.6318739     | 35.9440554     | 34.9541434     | 33.3885655     | 4.823E-67 | 3.57552  | up        | PREDICTED: cold-regulated 413 plasma membrane protein 2-like [Sesamum indicum]                                  |
| c37508.graph_c0 | 0.1540825     | 0.27762622    | 0             | 1.92616391     | 1.63803231     | 1.55345804     | 2.513E-07 | 2.49328  | up        | PREDICTED: kinesin-4-like [Sesamum indicum]                                                                     |
| c37508.graph_c1 | 0.2172957     | 0.29001772    | 0.23269465    | 2.10572352     | 2.78060871     | 2.1478165      | 3.717E-07 | 2.15738  | up        | PREDICTED: kinesin-4-like [Sesamum indicum]                                                                     |
| c37510.graph_c0 | 1.72032766    | 2.30754741    | 1.5474824     | 8.52721121     | 8.263735       | 8.5701366      | 1.836E-07 | 1.09724  | up        | PREDICTED: laccase-4-like [Sesamum indicum]                                                                     |
| c37512.graph_c1 | 6.17331981    | 6.14860395    | 6.3067035     | 54.7381458     | 55.2772522     | 52.0430724     | 4.396E-92 | 2.0298   | up        | PREDICTED: dolichyl-diphosphooligosaccharide--protein glycosyltransferase 48 kDa subunit-like [Sesamum indicum] |
| c37513.graph_c0 | 12.4690316    | 12.1179781    | 9.17833745    | 10.5581596     | 9.29470247     | 9.90767779     | 6.078E-09 | -1.26876 | down      | -                                                                                                               |
| c37514.graph_c0 | 1.46084451    | 2.05513462    | 1.57282525    | 14.0034023     | 14.2501386     | 12.3866889     | 5.001E-22 | 1.90648  | up        | PREDICTED: uncharacterized protein LOC105161074 [Sesamum indicum]                                               |
| c37515.graph_c0 | 4.88266602    | 4.18374731    | 4.54267946    | 21.3205507     | 20.9806925     | 20.177272      | 1.41E-25  | 1.10858  | up        | PREDICTED: uncharacterized protein LOC105164119 [Sesamum indicum]                                               |
| c37518.graph_c0 | 36.3781275    | 36.9126261    | 38.0088507    | 23.5061654     | 20.752222      | 20.8530147     | 3.067E-78 | -1.86473 | down      | hypothetical protein MIMGU_mgv1a00911mg [Erythranthe guttata]                                                   |
| c37520.graph_c0 | 102.078254    | 107.261005    | 101.367731    | 63.1464418     | 61.725954      | 58.2597147     | 1.28E-107 | -1.85329 | down      | PREDICTED: probable E3 ubiquitin ligase SUD1 [Sesamum indicum]                                                  |
| c37521.graph_c0 | 1.79678597    | 2.13581991    | 2.54945581    | 14.2832122     | 12.7981432     | 12.5651833     | 4.435E-17 | 1.51767  | up        | PREDICTED: inactive beta-amylase 9 [Sesamum indicum]                                                            |
| c37522.graph_c0 | 3.41678101    | 2.16012783    | 3.00416239    | 28.231163      | 29.3844131     | 26.1292482     | 2.174E-13 | 2.19636  | up        | PREDICTED: elongation factor 1u, mitochondrial [Sesamum indicum]                                                |
| c37522.graph_c1 | 1.66852606    | 1.27720935    | 1.51349792    | 13.1967587     | 13.203591      | 14.2027089     | 1.652E-11 | 2.09715  | up        | hypothetical protein MIMGU_mgv1a006302mg [Erythranthe guttata]                                                  |
| c37524.graph_c0 | 24.907545     | 20.8541537    | 25.9619803    | 13.7372632     | 13.2027948     | 14.6221629     | 5.804E-20 | -1.87838 | down      | PREDICTED: uncharacterized protein LOC105159531 [Sesamum indicum]                                               |
| c37525.graph_c0 | 11.7932581    | 12.5444242    | 11.1050857    | 10.0027997     | 9.74248465     | 10.177201      | 2.519E-36 | -1.33367 | down      | PREDICTED: probable protein phosphatase 2C 35 [Sesamum indicum]                                                 |
| c37526.graph_c0 | 12.0341671    | 11.0155251    | 12.3218866    | 11.973631      | 12.7114489     | 11.983988      | 6.999E-11 | -1.03935 | down      | -                                                                                                               |
| c37531.graph_c0 | 59.2718691    | 60.1059929    | 60.9333588    | 38.5781609     | 36.0354252     | 38.9688226     | 4.121E-95 | -1.75736 | down      | PREDICTED: F-box/LRR-repeat protein 14 [Sesamum indicum]                                                        |
| c37532.graph_c0 | 22.8716531    | 19.0787963    | 20.393741     | 4.74942447     | 4.33933601     | 4.52140685     | 7.689E-92 | -3.285   | down      | hypothetical protein JCGZ_04972 [Jatropha curcas]                                                               |
| c37536.graph_c0 | 3.09622239    | 2.86293377    | 2.89978033    | 18.212308      | 20.1288415     | 18.1756633     | 2.306E-33 | 1.58324  | up        | PREDICTED: lysM domain receptor-like kinase 5 [Sesamum indicum]                                                 |
| c37539.graph_c0 | 0.58002341    | 0.77413895    | 0.49690203    | 11.2883776     | 10.5729736     | 10.5489536     | 1.375E-20 | 3.0421   | up        | PREDICTED: growth-regulating factor 3 [Sesamum indicum]                                                         |
| c37539.graph_c1 | 15.4605972    | 13.0324873    | 14.116367     | 6.65329318     | 7.07526437     | 6.63548466     | 6.888E-15 | -2.15515 | down      | -                                                                                                               |
| c37540.graph_c0 | 1.722227      | 1.72395155    | 2.28690087    | 8.65762387     | 8.60814298     | 7.30287256     | 4.514E-08 | 1.00416  | up        | hypothetical protein MIMGU_mgv1a025916mg, partial [Erythranthe guttata]                                         |
| c37544.graph_c0 | 379.406992    | 354.534787    | 356.753969    | 163.370728     | 188.030034     | 195.869964     | 5.16E-136 | -2.08443 | down      | PREDICTED: uncharacterized GPI-anchored protein At3g06035 [Sesamum indicum]                                     |
| c37545.graph_c0 | 3.09313898    | 3.61227567    | 3.09151582    | 15.4242964     | 14.2086103     | 16.5606577     | 2.578E-06 | 1.14783  | up        | Uncharacterized protein TCM_037774 [Theobroma cacao]                                                            |

| #ID             | 0 h-1<br>FPKM | 0 h-2<br>FPKM | 0 h-3<br>FPKM | 28 h-1<br>FPKM | 28 h-2<br>FPKM | 28 h-3<br>FPKM | FDR       | log2FC   | regulated | nr_annotation                                                                                        |
|-----------------|---------------|---------------|---------------|----------------|----------------|----------------|-----------|----------|-----------|------------------------------------------------------------------------------------------------------|
| c37546.graph_c0 | 7.00358441    | 7.70395323    | 7.34331133    | 34.5264199     | 34.0655228     | 33.2168524     | 2.741E-34 | 1.11593  | up        | PREDICTED: calcium-transporting ATPase 4, endoplasmic reticulum-type-like [Sesamum indicum]          |
| c37546.graph_c1 | 6.74675816    | 6.66580604    | 5.29198719    | 32.8598513     | 31.0493353     | 32.7372545     | 4.15E-13  | 1.28203  | up        | PREDICTED: calcium-transporting ATPase 4, endoplasmic reticulum-type-like [Sesamum indicum]          |
| c37547.graph_c0 | 105.359496    | 113.329673    | 98.6421047    | 59.1594058     | 61.5936416     | 53.6472426     | 2.331E-94 | -1.95366 | down      | PREDICTED: F-box protein SKIP2 [Sesamum indicum]                                                     |
| c37548.graph_c0 | 1.61628554    | 1.9985873     | 1.5271992     | 10.9524154     | 10.9808501     | 10.0929817     | 2.745E-11 | 1.54924  | up        | PREDICTED: protein-S-isoprenylcysteine O-methyltransferase A isoform X2 [Sesamum indicum]            |
| c37552.graph_c0 | 1.18961132    | 1.16833456    | 1.70175776    | 8.71127954     | 9.8392005      | 7.93364504     | 2.271E-16 | 1.60918  | up        | PREDICTED: uncharacterized protein LOC105164201 isoform X1 [Sesamum indicum]                         |
| c37555.graph_c0 | 24.6451084    | 25.2972646    | 26.4976071    | 20.9811679     | 21.8018693     | 20.5641202     | 6.024E-48 | -1.36272 | down      | hypothetical protein M569_08441 [Genlisea aurea]                                                     |
| c37557.graph_c0 | 0.37618014    | 0.25103788    | 0.32227092    | 2.41508242     | 2.30402279     | 2.9746227      | 2.859E-05 | 1.93022  | up        | PREDICTED: cancer-related nucleoside-triphosphatase homolog isoform X1 [Sesamum indicum]             |
| c37559.graph_c0 | 4.8194351     | 4.69503976    | 3.76013584    | 101.610666     | 108.970018     | 103.201628     | 1.22E-232 | 3.47544  | up        | PREDICTED: betaine aldehyde dehydrogenase 1, chloroplastic [Sesamum indicum]                         |
| c37565.graph_c0 | 0.19413641    | 0.16194234    | 0.2910518     | 6.74915046     | 6.20001471     | 6.38994705     | 2.085E-30 | 3.80434  | up        | PREDICTED: uncharacterized protein LOC105172319 [Sesamum indicum]                                    |
| c37571.graph_c0 | 12.9196786    | 11.1763345    | 11.3244073    | 59.8754087     | 58.3271689     | 57.1111784     | 6.822E-36 | 1.21797  | up        | hypothetical protein MIMGU_mgv1a014580mg [Erythranthe guttata]                                       |
| c37573.graph_c0 | 0.61506506    | 0.41045397    | 0.50057587    | 14.9455606     | 15.7950872     | 15.247359      | 2.59E-106 | 3.82453  | up        | PREDICTED: putative potassium transporter 12 [Sesamum indicum]                                       |
| c37575.graph_c0 | 23.6741513    | 22.1975614    | 23.4185448    | 14.557219      | 15.0885504     | 14.2017619     | 1.469E-70 | -1.75098 | down      | hypothetical protein MIMGU_mgv1a005560mg [Erythranthe guttata]                                       |
| c37577.graph_c0 | 0.9835976     | 1.8707068     | 1.39035805    | 0              | 0              | 0.02916653     | 7.572E-16 | -8.2634  | down      | PREDICTED: glycerol-3-phosphate acyltransferase 5-like [Sesamum indicum]                             |
| c37578.graph_c0 | 18.8518484    | 20.0154901    | 16.5788799    | 10.766325      | 11.4095482     | 10.8517236     | 1.649E-52 | -1.83629 | down      | PREDICTED: lysine-specific demethylase JMJ25-like [Sesamum indicum]                                  |
| c37579.graph_c0 | 0             | 0             | 0             | 1.27083966     | 1.45432497     | 1.56755025     | 4.935E-20 | Inf      | up        | PREDICTED: protein STICHEL-like 2 [Sesamum indicum]                                                  |
| c37580.graph_c0 | 50.9575476    | 48.1747642    | 44.4817762    | 2.89925558     | 3.03997466     | 2.48024156     | 0         | -5.18212 | down      | PREDICTED: protein PLANT CADMIUM RESISTANCE 2-like [Sesamum indicum]                                 |
| c37584.graph_c0 | 32.6052918    | 35.8628143    | 28.2658262    | 10.1329334     | 10.2790559     | 12.6496498     | 2.566E-46 | -2.63626 | down      | PREDICTED: LOW QUALITY PROTEIN: ethylene-responsive transcription factor ERF061 [Sesamum indicum]    |
| c37587.graph_c0 | 0.38234673    | 0.51941873    | 0.42114059    | 5.91503177     | 6.0934379      | 6.08996049     | 8.353E-23 | 2.68331  | up        | PREDICTED: G-type lectin S-receptor-like serine/threonine-protein kinase At1g11300 [Sesamum indicum] |
| c37588.graph_c0 | 12.5258256    | 13.3281868    | 11.0265183    | 5.37619953     | 6.73116303     | 7.19457326     | 2.706E-22 | -2.02218 | down      | PREDICTED: CBL-interacting serine/threonine-protein kinase 1-like [Sesamum indicum]                  |
| c37590.graph_c0 | 0.03021021    | 0.03024046    | 0.03882132    | 1.339353       | 1.28860921     | 1.79164117     | 1.277E-12 | 4.38395  | up        | PREDICTED: LOW QUALITY PROTEIN: interactor of constitutive active ROPs 3 [Sesamum indicum]           |
| c37595.graph_c0 | 1488.66418    | 1562.82425    | 1488.39846    | 87.6148833     | 101.769178     | 98.0701905     | 0         | -5.07162 | down      | hypothetical protein CISIN_1g036208mg, partial [Citrus sinensis]                                     |
| c37599.graph_c0 | 2.03544939    | 2.95635453    | 2.7182069     | 0              | 0.02619053     | 0.04733882     | 1.838E-37 | -7.79958 | down      | -                                                                                                    |



| #ID             | 0 h-1<br>FPKM | 0 h-2<br>FPKM | 0 h-3<br>FPKM | 28 h-1<br>FPKM | 28 h-2<br>FPKM | 28 h-3<br>FPKM | FDR       | log2FC   | regulated | nr_annotation                                                                              |
|-----------------|---------------|---------------|---------------|----------------|----------------|----------------|-----------|----------|-----------|--------------------------------------------------------------------------------------------|
| c37600.graph_c0 | 7.88081605    | 7.91111859    | 7.13504499    | 115.563495     | 104.754379     | 112.19733      | 1.43E-177 | 2.76925  | up        | PREDICTED: alpha-L-arabinofuranosidase 1-like [Sesamum indicum]                            |
| c37601.graph_c0 | 10.6611181    | 13.0718757    | 11.7192419    | 10.0823064     | 10.255348      | 10.4615952     | 5.71E-17  | -1.29401 | down      | PREDICTED: UDP-glycosyltransferase 14F2-like [Sesamum indicum]                             |
| c37602.graph_c0 | 1.18989297    | 0.9966217     | 1.09218541    | 7.81856445     | 8.0155612      | 7.50320531     | 1.794E-18 | 1.74129  | up        | PREDICTED: probable serine/threonine-protein kinase At1g54610 isoform X1 [Sesamum indicum] |
| c37606.graph_c0 | 0.13301875    | 0.16643994    | 0.21366796    | 1.54683623     | 2.20408526     | 2.22858199     | 3.342E-08 | 2.44692  | up        | PREDICTED: aspartic proteinase-like protein 1 [Sesamum indicum]                            |
| c37607.graph_c0 | 4.21568496    | 3.49731963    | 4.41548854    | 21.258676      | 20.5588662     | 19.1449565     | 5.685E-23 | 1.2374   | up        | PREDICTED: protein IQ-DOMAIN 1 [Sesamum indicum]                                           |
| c37612.graph_c0 | 25.1190175    | 27.3367703    | 21.4284893    | 26.5500327     | 24.8068119     | 25.8550567     | 1.29E-13  | -1.02463 | down      | hypothetical protein MIMGU_mgv1a010621mg [Erythranthe outtata]                             |
| c37614.graph_c0 | 0.61995837    | 0.84221458    | 0.62595582    | 6.27596591     | 6.94522821     | 6.43424897     | 2.26E-12  | 2.1447   | up        | PREDICTED: 3-phosphoinositide-dependent protein kinase 2-like [Sesamum indicum]            |
| c37617.graph_c0 | 7.18120744    | 6.93349059    | 6.47932945    | 0.33314427     | 0.36764205     | 0.33225256     | 1.115E-84 | -5.40689 | down      | PREDICTED: uncharacterized protein LOC104880178 [Vitis vinifera]                           |
| c37620.graph_c0 | 0.67753259    | 0.64251572    | 0.59571214    | 9.6671153      | 8.65829633     | 10.1934434     | 1.354E-28 | 2.80755  | up        | -                                                                                          |
| c37621.graph_c0 | 2.97544777    | 2.52227171    | 2.41125922    | 1.40272754     | 0.8443543      | 1.2082039      | 1.061E-21 | -2.28208 | down      | PREDICTED: polyadenylate-binding protein-interacting protein 4-like [Sesamum indicum]      |
| c37623.graph_c0 | 14.4927563    | 11.0531571    | 11.9090746    | 58.5419503     | 59.7158318     | 59.6975743     | 8.005E-18 | 1.15972  | up        | ATP binding protein, putative [Ricinus communis]                                           |
| c37626.graph_c0 | 4.24527231    | 2.66343362    | 3.41919385    | 14.3625033     | 14.4197814     | 15.2480022     | 1.805E-10 | 1.00353  | up        | PREDICTED: uncharacterized protein LOC105173972 [Sesamum indicum]                          |
| c37627.graph_c0 | 19.1109789    | 16.4950192    | 14.4977823    | 201.289552     | 202.251144     | 186.148011     | 1.16E-191 | 2.46927  | up        | PREDICTED: low-temperature-induced cysteine proteinase [Sesamum indicum]                   |
| c37630.graph_c0 | 0.03845902    | 0.11549258    | 0.09884272    | 5.19903325     | 6.73850519     | 5.49683253     | 1.776E-29 | 5.00977  | up        | hypothetical protein MIMGU_mgv1a004581mg [Erythranthe outtata]                             |
| c37632.graph_c0 | 17.6676907    | 18.5985369    | 16.1246383    | 10.0128283     | 8.47865914     | 8.64515184     | 4.61E-103 | -2.03845 | down      | PREDICTED: uncharacterized protein LOC105164604 [Sesamum indicum]                          |
| c37634.graph_c0 | 0.88851321    | 0.64683849    | 0.72658387    | 13.942681      | 12.7479518     | 11.880102      | 1.868E-36 | 3.00279  | up        | PREDICTED: ureidoglycolate hydrolase [Sesamum indicum]                                     |
| c37635.graph_c0 | 138.873848    | 133.309605    | 138.847793    | 124.259251     | 125.428611     | 122.981287     | 8.818E-52 | -1.2321  | down      | PREDICTED: uncharacterized protein LOC105176574 [Sesamum indicum]                          |
| c37636.graph_c0 | 2.26648961    | 2.11229301    | 1.22527077    | 34.5131799     | 30.4441433     | 29.5715236     | 2.567E-74 | 2.99257  | up        | PREDICTED: LRR receptor-like serine/threonine-protein kinase RCH1 [Sesamum indicum]        |
| c37639.graph_c0 | 1.59698029    | 1.51216972    | 2.1631117     | 1.4743723      | 0.79306721     | 0.89590748     | 3.388E-06 | -1.83247 | down      | PREDICTED: LOW QUALITY PROTEIN: transcription factor GAMYB [Sesamum indicum]               |
| c37640.graph_c0 | 3.72685691    | 4.61882422    | 3.02173107    | 22.572151      | 21.8654036     | 21.8129925     | 1.226E-20 | 1.45561  | up        | hypothetical protein MIMGU_mgv1a01112/mg [Erythranthe outtata]                             |
| c37641.graph_c0 | 64.0167555    | 57.8258215    | 59.7119228    | 36.8640787     | 38.2578971     | 38.2022055     | 2.947E-83 | -1.7698  | down      | PREDICTED: probable prefoldin subunit 2 [Sesamum indicum]                                  |
| c37644.graph_c0 | 28.9225562    | 32.2920775    | 24.5054702    | 27.8351652     | 29.4082055     | 27.3313177     | 3.062E-12 | -1.10781 | down      | PREDICTED: uncharacterized protein LOC102585852 isoform X1 [Solanum tuberosum]             |
| c37646.graph_c0 | 0.90462727    | 0.70430354    | 0.60276837    | 5.94165203     | 6.66196997     | 6.29886735     | 1.341E-13 | 2.00938  | up        | PREDICTED: trehalose-phosphate phosphatase A-like isoform X2 [Sesamum indicum]             |

| #ID             | 0 h-1<br>FPKM | 0 h-2<br>FPKM | 0 h-3<br>FPKM | 28 h-1<br>FPKM | 28 h-2<br>FPKM | 28 h-3<br>FPKM | FDR       | log2FC   | regulated | nr_annotation                                                                                                     |
|-----------------|---------------|---------------|---------------|----------------|----------------|----------------|-----------|----------|-----------|-------------------------------------------------------------------------------------------------------------------|
| c37647.graph_c0 | 3.54267988    | 3.2608987     | 2.61637006    | 20.8055623     | 19.5604062     | 18.8125385     | 1.867E-22 | 1.56415  | up        | PREDICTED: acetyl-coenzyme A carboxylase carboxyl transferase subunit alpha, chloroplastic-like [Sesamum indicum] |
| c37648.graph_c0 | 0.12406632    | 0.28386413    | 0.09110294    | 3.76140588     | 4.48949309     | 3.69994973     | 2.66E-30  | 3.4961   | up        | PREDICTED: probable LRR receptor-like serine/threonine-protein kinase At2g24230 [Sesamum indicum]                 |
| c37651.graph_c0 | 3.97891729    | 3.7173748     | 3.54505927    | 31.0006765     | 29.6966054     | 29.134792      | 4.011E-35 | 1.90906  | up        | PREDICTED: ras-related protein RABA1d [Sesamum indicum]                                                           |
| c37654.graph_c0 | 0.37448132    | 0.56228446    | 0.42107041    | 14.3910345     | 16.4341817     | 14.5468428     | 4.032E-49 | 3.97132  | up        | Alpha/beta-Hydrolases superfamily protein isoform 1 [1 neobroma cacao]                                            |
| c37656.graph_c0 | 55.7857726    | 72.2102272    | 37.5517346    | 225.41597      | 310.837173     | 242.891946     | 0.0001568 | 1.14864  | up        | PREDICTED: cytochrome P450 CYP756A12-like [Sesamum indicum]                                                       |
| c37664.graph_c0 | 17.9047204    | 9.02770482    | 10.0554682    | 0              | 0              | 0              | 7.515E-18 | -Inf     | down      | metallothionein-like protein type 2 [Narcissus pseudonarcissus]                                                   |
| c37666.graph_c0 | 0.56297104    | 0.81968693    | 0.52613823    | 7.66252777     | 8.22836561     | 7.37559272     | 2.962E-15 | 2.51852  | up        | PREDICTED: beta-galactosidase 9-like [Sesamum indicum]                                                            |
| c37666.graph_c1 | 0.33227813    | 0.20468361    | 0.3612997     | 4.82995664     | 5.63575125     | 4.72944621     | 1.145E-23 | 2.98661  | up        | PREDICTED: beta-galactosidase 9-like [Sesamum indicum]                                                            |
| c37669.graph_c0 | 1.57992616    | 1.42721474    | 1.93123022    | 12.8271415     | 12.5932089     | 13.5520475     | 3.98E-22  | 1.887    | up        | PREDICTED: alkylated DNA repair protein alkB homolog 8 [Sesamum indicum]                                          |
| c37670.graph_c0 | 22.5102761    | 22.7994773    | 20.0261049    | 19.4028365     | 19.8165083     | 18.484481      | 1.268E-50 | -1.26849 | down      | PREDICTED: cationic amino acid transporter 1-like isoform X1 [Sesamum indicum]                                    |
| c37671.graph_c0 | 81.6068808    | 78.2675227    | 84.3015049    | 396.035436     | 436.790453     | 427.471173     | 7.519E-59 | 1.2767   | up        | BnaC02g12080D [Brassica napus]                                                                                    |
| c37673.graph_c0 | 106.354669    | 106.088201    | 105.920549    | 45.4941675     | 39.3110928     | 44.4148613     | 7.21E-183 | -2.39099 | down      | PREDICTED: ethylene receptor 1 [Sesamum indicum]                                                                  |
| c37673.graph_c1 | 0.2788139     | 0.31397973    | 0.31350104    | 7.87764308     | 8.78233078     | 7.77158441     | 1.489E-33 | 3.66045  | up        | PREDICTED: ethylene receptor 1 [Sesamum indicum]                                                                  |
| c37674.graph_c0 | 6820.08107    | 6352.57917    | 6186.29338    | 6416.47393     | 7280.45621     | 6194.2988      | 3.131E-14 | -1.05091 | down      | 2S albumin precursor isoform 3 [Sesamum indicum]                                                                  |
| c37675.graph_c0 | 1.92646068    | 1.24412241    | 2.23600615    | 9.89131526     | 9.33873532     | 8.95575111     | 8.089E-07 | 1.28793  | up        | hypothetical protein EUGRSUZ_B02864 [Eucalyptus grandis]                                                          |
| c37682.graph_c0 | 1.43952262    | 1.274699      | 1.42295659    | 7.12245785     | 6.46724448     | 5.45067794     | 0.0001864 | 1.11068  | up        | PREDICTED: calcineurin B-like protein 7 [Sesamum indicum]                                                         |
| c37684.graph_c0 | 0.70571057    | 0.57797774    | 0.61831775    | 8.57952487     | 8.58851813     | 7.95202091     | 5.132E-26 | 2.63358  | up        | PREDICTED: uncharacterized protein LOC105162014 [Sesamum indicum]                                                 |
| c37685.graph_c0 | 240.100628    | 228.699912    | 242.721351    | 161.895813     | 154.635085     | 158.112975     | 1.8E-90   | -1.67487 | down      | PREDICTED: protein DEHYDRATION-INDUCED 19 homolog 3-like isoform X2 [Sesamum indicum]                             |
| c37693.graph_c0 | 1.55631132    | 1.3052422     | 1.24319454    | 5.74730276     | 6.23817164     | 6.31120896     | 7.309E-05 | 1.06837  | up        | PREDICTED: uncharacterized protein LOC105162119 isoform X1 [Sesamum indicum]                                      |
| c37694.graph_c0 | 8.1426415     | 8.06705408    | 8.09855266    | 82.6091423     | 74.771304      | 79.3818082     | 7.88E-130 | 2.19355  | up        | PREDICTED: transcription factor DIVARICA1A [Sesamum indicum]                                                      |
| c37697.graph_c0 | 0.90584938    | 0.90675645    | 0.6008012     | 112.155853     | 101.803135     | 94.2736856     | 6.73E-189 | 5.91084  | up        | PREDICTED: granule-bound starch synthase 1, chloroplastic/amyloplastic [Sesamum indicum]                          |
| c37698.graph_c0 | 67.4279551    | 57.5471615    | 61.5964174    | 344.099434     | 371.693639     | 382.114236     | 1.011E-56 | 1.46744  | up        | PREDICTED: 40S ribosomal protein S8 [Sesamum indicum]                                                             |
| c37704.graph_c1 | 0             | 0             | 0             | 0.97285601     | 0.79706463     | 1.55828354     | 5.403E-08 | Inf      | up        | --                                                                                                                |
| c37707.graph_c0 | 1.07914519    | 1.02878647    | 0.79242531    | 17.8338633     | 18.0413277     | 18.8646399     | 3.47E-82  | 3.1518   | up        | Dihydrolypollysine-residue acetyltransferase component of pyruvate dehydrogenase, putative [Ricinus communis]     |

| #ID             | 0 h-1<br>FPKM | 0 h-2<br>FPKM | 0 h-3<br>FPKM | 28 h-1<br>FPKM | 28 h-2<br>FPKM | 28 h-3<br>FPKM | FDR       | log2FC   | regulated | nr_annotation                                                                   |
|-----------------|---------------|---------------|---------------|----------------|----------------|----------------|-----------|----------|-----------|---------------------------------------------------------------------------------|
| c37710.graph_c0 | 502.178741    | 501.604659    | 521.849556    | 151.874762     | 149.782524     | 164.886342     | 1.33E-208 | -2.79995 | down      | PREDICTED: uncharacterized protein LOC105175543 [Sesamum indicum]               |
| c37714.graph_c0 | 10.2166985    | 9.04119804    | 11.4164017    | 10.7615037     | 10.0081277     | 11.5913149     | 9.958E-05 | -1.01463 | down      | hypothetical protein glysoja_022734 [Glycine soja]                              |
| c37716.graph_c0 | 41.9987933    | 60.4758733    | 39.2509907    | 210.733181     | 245.393793     | 195.931907     | 1.779E-07 | 1.11243  | up        | PREDICTED: cytochrome P450 71D95-like [Sesamum indicum]                         |
| c37716.graph_c1 | 95.8591727    | 124.788746    | 82.9068767    | 484.752196     | 569.972101     | 473.165319     | 3.533E-12 | 1.24286  | up        | PREDICTED: cytochrome P450 71D95-like [Sesamum indicum]                         |
| c37717.graph_c0 | 18.8792366    | 18.2802185    | 17.5839529    | 6.87935409     | 7.02159588     | 8.60329394     | 9.347E-74 | -2.37114 | down      | PREDICTED: uncharacterized protein LOC105174387 [Sesamum indicum]               |
| c37721.graph_c0 | 47.8418295    | 55.7522298    | 57.6247598    | 39.6495086     | 36.2683724     | 31.2526339     | 1.044E-18 | -1.68248 | down      | -                                                                               |
| c37727.graph_c0 | 0.60325684    | 0.84540528    | 0.15504178    | 5.48054493     | 4.79006884     | 5.08028278     | 6.089E-08 | 2.18098  | up        | PREDICTED: mitochondrial inner membrane protease subunit 2 [Sesamum indicum]    |
| c37732.graph_c0 | 0             | 0.16106347    | 0             | 2.06599126     | 1.79500408     | 1.04966898     | 1.442E-05 | 3.84611  | up        | PREDICTED: expansin-A2-like [Sesamum indicum]                                   |
| c37733.graph_c0 | 0.2075223     | 0.15107644    | 0.24243124    | 1.19289662     | 1.29991666     | 0.99577078     | 0.0002046 | 1.4423   | up        | PREDICTED: protein argonaute 16 isoform X1 [Sesamum indicum]                    |
| c37734.graph_c0 | 3.19433115    | 2.1604931     | 2.36675574    | 0.64838077     | 0.83092871     | 1.33121698     | 2.881E-12 | -2.54263 | down      | Adenosylhomocysteinase [Rozella allomycis CSF55]                                |
| c37737.graph_c0 | 0.19271342    | 0.11574383    | 0.34670212    | 3.69766323     | 3.21217945     | 3.22298548     | 3.829E-12 | 2.84985  | up        | PREDICTED: glucose-6-phosphate 1-dehydrogenase, chloroplastic [Sesamum indicum] |
| c37742.graph_c0 | 1.47448983    | 0.95223633    | 0.97794984    | 0              | 0              | 0              | 1.029E-24 | -Inf     | down      | hypothetical protein WALSEDKAF1_61591 [Wallemia sebi CBS 633.661]               |
| c37744.graph_c0 | 10.9755882    | 12.8017524    | 10.3020999    | 2.94801961     | 3.69518431     | 3.48098672     | 1.662E-50 | -2.84035 | down      | PREDICTED: uncharacterized protein LOC105167616 isoform X1 [Sesamum indicum]    |
| c37745.graph_c0 | 37.2538958    | 40.8591036    | 34.67465      | 13.7202555     | 14.8830512     | 14.1237007     | 2.459E-91 | -2.48987 | down      | PREDICTED: U-box domain-containing protein 14 [Sesamum indicum]                 |
| c37751.graph_c0 | 0.15614381    | 0.10420011    | 0.10032549    | 2.00489149     | 2.22009222     | 1.9292159      | 1.631E-11 | 3.0067   | up        | PREDICTED: proline-rich receptor-like protein kinase PERK10 [Sesamum indicum]   |
| c37753.graph_c0 | 0.32946337    | 0.17357541    | 0.1559797     | 1.62575358     | 1.66134764     | 1.70709979     | 3.24E-07  | 1.83998  | up        | PREDICTED: BTB/POZ domain-containing protein At5g67385 [Sesamum indicum]        |
| c37755.graph_c0 | 0.59490187    | 0.92302125    | 0.80269609    | 10.0310131     | 10.2672755     | 11.5722143     | 3.762E-36 | 2.68737  | up        | PREDICTED: uncharacterized protein LOC105157935 [Sesamum indicum]               |
| c37758.graph_c0 | 0             | 0             | 0             | 22.8939848     | 20.9992348     | 18.1306086     | 1.046E-66 | Inf      | up        | PREDICTED: non-specific phospholipase C6-like [Eucalyptus grandis]              |
| c37758.graph_c1 | 0.11457534    | 0             | 0             | 14.572722      | 13.3833639     | 13.0123945     | 6.118E-52 | 7.42292  | up        | PREDICTED: non-specific phospholipase C6 [Sesamum indicum]                      |
| c37760.graph_c0 | 0.15844967    | 0.23791251    | 0.35632468    | 2.64868714     | 3.43130578     | 2.96005099     | 1.467E-09 | 2.4857   | up        | -                                                                               |
| c37761.graph_c0 | 10.7545561    | 8.95094452    | 11.1026087    | 68.8102219     | 67.1645366     | 68.6539104     | 1.586E-50 | 1.64017  | up        | unnamed protein product [Triticum aestivum]                                     |
| c37763.graph_c0 | 0             | 0             | 0.03116116    | 1.6390474      | 1.84590441     | 1.25116224     | 1.651E-17 | 6.11602  | up        | PREDICTED: probable membrane-associated kinase regulator 4 [Sesamum indicum]    |
| c37764.graph_c0 | 1.16043173    | 2.01750489    | 1.49120071    | 62.8551289     | 59.0368083     | 71.0660675     | 1.896E-74 | 4.27803  | up        | PREDICTED: acid phosphatase 1-like [Camelina sativa]                            |
| c37766.graph_c0 | 0.29313528    | 0.44014322    | 0             | 2.91167015     | 2.98163121     | 3.07128416     | 6.976E-08 | 2.53938  | up        | PREDICTED: indole-3-acetate O-methyltransferase 1 [Sesamum indicum]             |
| c37767.graph_c0 | 47.2597556    | 45.3227218    | 47.7897285    | 27.3747585     | 28.9837474     | 29.4150651     | 2.27E-93  | -1.80132 | down      | PREDICTED: U-box domain-containing protein 4-like [Sesamum indicum]             |

| #ID             | 0 h-1<br>FPKM | 0 h-2<br>FPKM | 0 h-3<br>FPKM | 28 h-1<br>FPKM | 28 h-2<br>FPKM | 28 h-3<br>FPKM | FDR       | log2FC   | regulated | nr_annotation                                                                                                       |
|-----------------|---------------|---------------|---------------|----------------|----------------|----------------|-----------|----------|-----------|---------------------------------------------------------------------------------------------------------------------|
| c37769.graph_c0 | 2.49950625    | 3.12751141    | 0.80299112    | 14.5330139     | 11.8917662     | 18.1588191     | 0.0003927 | 1.71634  | up        | -                                                                                                                   |
| c37772.graph_c0 | 21.0443411    | 18.507643     | 18.8649166    | 11.0550808     | 11.8008705     | 11.0080172     | 4.866E-88 | -1.87631 | down      | PREDICTED: histone-lysine N-methyltransferase setd3 [Sesamum indicum]                                               |
| c37775.graph_c0 | 191.417992    | 192.68639     | 195.677962    | 114.223743     | 116.636876     | 120.6778       | 6.55E-98  | -1.81246 | down      | PREDICTED: acetate/butyrate--CoA ligase AAE7, peroxisomal [Sesamum indicum]                                         |
| c37776.graph_c0 | 1.28799006    | 1.38845516    | 0.9548759     | 14.5456122     | 16.6117044     | 14.2194177     | 1.064E-28 | 2.55622  | up        | PREDICTED: GDSL esterase/lipase At2g04570-like [Sesamum indicum]                                                    |
| c37780.graph_c0 | 12.3177879    | 12.3113263    | 11.1236244    | 11.5181519     | 10.7941169     | 12.2495139     | 1.083E-32 | -1.13757 | down      | PREDICTED: AP-3 complex subunit delta isoform X1 [Sesamum indicum]                                                  |
| c37786.graph_c0 | 3.80051131    | 3.62940583    | 3.36814311    | 20.5418017     | 18.6046542     | 20.0262465     | 1.339E-17 | 1.36528  | up        | PREDICTED: THO complex subunit 7A [Sesamum indicum]                                                                 |
| c37787.graph_c0 | 0             | 0             | 0             | 0.88948176     | 0.94726813     | 1.09802003     | 2.567E-14 | Inf      | up        | --                                                                                                                  |
| c37793.graph_c0 | 35.8461888    | 33.6303314    | 34.9560058    | 214.084106     | 211.996184     | 204.448366     | 5.403E-80 | 1.50341  | up        | PREDICTED: DEAD-box ATP-dependent RNA helicase 7-like [Sesamum indicum]                                             |
| c37795.graph_c0 | 0             | 0             | 0             | 0.77541738     | 0.80784137     | 0.82742171     | 6.334E-10 | Inf      | up        | PREDICTED: putative late blight resistance protein homolog R1B-16 [Sesamum indicum]                                 |
| c37801.graph_c0 | 3.46379579    | 2.88188198    | 3.52620777    | 12.8815835     | 14.7599773     | 14.9932284     | 9.191E-09 | 1.01958  | up        | PREDICTED: telomere repeat-binding factor 1 isoform X2 [Sesamum indicum]                                            |
| c37803.graph_c0 | 0.46527115    | 0.36985001    | 0.29894593    | 10.0054509     | 10.596522      | 10.6396462     | 7.5E-104  | 3.6986   | up        | PREDICTED: LOW QUALITY PROTEIN: LRR receptor-like serine/threonine-protein kinase RCH1 [Sesamum indicum]            |
| c37804.graph_c0 | 147.625928    | 129.726671    | 142.60595     | 22.6303323     | 23.9128143     | 23.1204454     | 1.07E-163 | -3.6823  | down      | PREDICTED: SFX domain-containing protein 1-like [Sesamum indicum]                                                   |
| c37805.graph_c0 | 140.224353    | 147.734754    | 138.478325    | 64.6186621     | 66.8364037     | 65.2653307     | 3.79E-158 | -2.20648 | down      | hypothetical protein MIMGU_mgv1a026895mg [Erythranthe ontifata]                                                     |
| c37807.graph_c0 | 28.2497598    | 28.5007095    | 29.5847495    | 25.6647033     | 24.924467      | 27.2413347     | 1.095E-32 | -1.24037 | down      | PREDICTED: pollen-specific leucine-rich repeat extensin-like protein 1 [Nicotiana sylvestris]                       |
| c37812.graph_c0 | 0.22038068    | 0.11030068    | 0.2831979     | 2.162314       | 3.7239589      | 3.75758361     | 1.241E-06 | 2.87812  | up        | PREDICTED: AMSH-like ubiquitin thioesterase 2 isoform X2 [Sesamum indicum]                                          |
| c37826.graph_c0 | 1.23976729    | 2.1510818     | 1.27452004    | 16.9999179     | 18.6036073     | 17.401014      | 1.195E-36 | 2.41674  | up        | PREDICTED: UDP-N-acetylglucosamine--dolichyl-phosphate N-acetylglucosaminophosphotransferase-like [Sesamum indicum] |
| c37828.graph_c0 | 47.1714843    | 44.257978     | 50.2413035    | 14.5042784     | 14.5350021     | 14.4867381     | 1.068E-75 | -2.79421 | down      | PREDICTED: uncharacterized protein LOC105157890 [Sesamum indicum]                                                   |
| c37829.graph_c0 | 0.31868284    | 0.27912671    | 0.23035504    | 6.19575078     | 6.84895185     | 5.75261017     | 3.418E-41 | 3.4171   | up        | PREDICTED: uncharacterized aarF domain-containing protein kinase At1g79600, chloroplastic [Sesamum indicum]         |
| c37835.graph_c0 | 105.53838     | 105.748638    | 106.434692    | 76.643942      | 76.1129248     | 76.4071256     | 4.447E-79 | -1.56203 | down      | PREDICTED: DEAD-box ATP-dependent RNA helicase 38 [Sesamum indicum]                                                 |
| c37837.graph_c1 | 0.89538416    | 0.30729626    | 0.49311604    | 12.3644409     | 12.27193       | 12.7140135     | 1.368E-61 | 3.37717  | up        | PREDICTED: serine/threonine protein phosphatase 2A 57 kDa regulatory subunit B&apos; iota isoform [Sesamum indicum] |
| c37839.graph_c0 | 1.66893868    | 1.5099743     | 1.79408412    | 1.14299568     | 1.18997987     | 1.03736317     | 1.574E-13 | -1.65366 | down      | PREDICTED: histidine kinase 1 [Sesamum indicum]                                                                     |

| #ID             | 0 h-1<br>FPKM | 0 h-2<br>FPKM | 0 h-3<br>FPKM | 28 h-1<br>FPKM | 28 h-2<br>FPKM | 28 h-3<br>FPKM | FDR       | log2FC   | regulated | nr_annotation                                                                                                |
|-----------------|---------------|---------------|---------------|----------------|----------------|----------------|-----------|----------|-----------|--------------------------------------------------------------------------------------------------------------|
| c37843.graph_c0 | 29.2098478    | 30.6463264    | 32.5176544    | 23.0459811     | 22.9609491     | 22.5108166     | 3.642E-21 | -1.52296 | down      | PREDICTED: coiled-coil domain-containing protein 150 [Sesamum indicum]                                       |
| c37845.graph_c0 | 22.0777098    | 21.0817161    | 18.3654852    | 15.6253673     | 14.7411563     | 15.3189262     | 1.165E-49 | -1.51761 | down      | PREDICTED: retinoblastoma-related protein [Sesamum indicum]                                                  |
| c37847.graph_c0 | 0.77583503    | 1.1036064     | 0.94450616    | 0.92000238     | 0.58951192     | 0.65384805     | 0.0001172 | -1.47662 | down      | PREDICTED: probable LRR receptor-like serine/threonine-protein kinase At1g56140 isoform X1 [Sesamum indicum] |
| c37849.graph_c0 | 905.230238    | 914.777562    | 981.434342    | 290.771407     | 293.751266     | 317.859847     | 8.16E-102 | -2.72557 | down      | hypothetical protein MIMGU_mgv1a008920mg [Erythranthe outtata]                                               |
| c37850.graph_c0 | 7.21689876    | 7.37006732    | 7.02575806    | 31.4712026     | 35.6868632     | 31.8625253     | 4.733E-13 | 1.10535  | up        | PREDICTED: GRF1-interacting factor 2-like [Sesamum indicum]                                                  |
| c37851.graph_c0 | 4.12253059    | 3.58839886    | 3.12592191    | 2.43792747     | 2.04999108     | 2.03488606     | 8.111E-22 | -1.81997 | down      | PREDICTED: clathrin interactor EPSIN 1-like isoform X3 [Sesamum indicum]                                     |
| c37854.graph_c0 | 0.50872867    | 0.44932773    | 0.36532333    | 6.8184603      | 5.84222658     | 6.30919846     | 1.356E-42 | 2.75495  | up        | PREDICTED: uncharacterized protein LOC105166467 isoform X1 [Sesamum indicum]                                 |
| c37856.graph_c0 | 40.3831501    | 40.113489     | 40.3208857    | 36.2495576     | 35.1694513     | 34.8810531     | 1.365E-54 | -1.27532 | down      | PREDICTED: VHS domain-containing protein At3g16270 [Sesamum indicum]                                         |
| c37858.graph_c0 | 8.86561839    | 9.212572      | 8.46312675    | 6.99577866     | 5.43000138     | 6.15916918     | 1.696E-13 | -1.60374 | down      | PREDICTED: kxDL motif-containing protein 1 [Sesamum indicum]                                                 |
| c37865.graph_c0 | 11.1452614    | 12.7590016    | 10.7613585    | 49.3179202     | 49.863295      | 49.7377436     | 6.188E-18 | 1.01326  | up        | hypothetical protein MIMGU_mgv1a009199mg [Erythranthe outtata]                                               |
| c37867.graph_c0 | 5.67617404    | 5.09910322    | 3.86525401    | 1.0930575      | 0.98692844     | 1.00701322     | 3.565E-26 | -3.33167 | down      | PREDICTED: uncharacterized protein LOC105158642 [Sesamum indicum]                                            |
| c37868.graph_c0 | 0.06329101    | 0             | 0             | 8.44091541     | 8.65968697     | 9.36504443     | 4.929E-61 | 7.64944  | up        | Nucleobase-ascorbate transporter 7 [Theobroma cacao]                                                         |
| c37870.graph_c0 | 4.93389022    | 4.29678277    | 4.69178076    | 4.5720518      | 4.53285313     | 4.79877754     | 3.792E-12 | -1.09194 | down      | PREDICTED: putative pentatricopeptide repeat-containing protein At5g43820 [Sesamum indicum]                  |
| c37874.graph_c0 | 4.31565832    | 3.51626263    | 3.67569922    | 18.6372134     | 17.2228263     | 18.4815116     | 2.9E-11   | 1.15075  | up        | PREDICTED: aspartic proteinase-like protein 1 isoform X1 [Sesamum indicum]                                   |
| c37877.graph_c0 | 43.0877936    | 24.3011224    | 26.8181863    | 0              | 0              | 0              | 9.466E-34 | -Inf     | down      | hypothetical protein SELMODKAF1_140819 [Selaginella moellendorffii]                                          |
| c37878.graph_c0 | 21.499304     | 24.4615671    | 21.5642882    | 24.9750315     | 22.4916918     | 23.9959772     | 6.818E-23 | -1.00829 | down      | hypothetical protein MIMGU_mgv1a013215mg [Erythranthe outtata]                                               |
| c37880.graph_c0 | 64.6268924    | 64.6916065    | 71.5000047    | 305.354266     | 315.188482     | 329.601433     | 7.168E-48 | 1.1506   | up        | elongation factor-like protein [Solanum tuberosum]                                                           |
| c37881.graph_c1 | 157.250435    | 162.222933    | 179.707888    | 69.4758397     | 73.9791291     | 68.7250925     | 5.303E-44 | -2.3268  | down      | heat shock protein 70 [Saussurea medusa]                                                                     |
| c37881.graph_c2 | 21.9345614    | 24.5703976    | 30.8712351    | 5.69354029     | 8.56788844     | 9.91121575     | 4.727E-13 | -2.77206 | down      | 70 kD heatshockprotein [Medicago sativa]                                                                     |
| c37887.graph_c0 | 18.7813448    | 21.029819     | 18.0197621    | 17.3110686     | 15.9126466     | 16.2272812     | 1.511E-35 | -1.31555 | down      | PREDICTED: zinc finger Ran-binding domain-containing protein 2 isoform X1 [Sesamum indicum]                  |
| c37888.graph_c0 | 17.7056823    | 19.0277322    | 12.410456     | 5.0693649      | 5.5831307      | 4.81841097     | 2.406E-15 | -2.75399 | down      | PREDICTED: myb-related protein 306-like [Sesamum indicum]                                                    |
| c37890.graph_c0 | 39.8098354    | 39.8496989    | 36.5630472    | 22.6551083     | 26.8774951     | 22.7138897     | 4.013E-71 | -1.77588 | down      | PREDICTED: probable acetyltransferase NATA1-like [Sesamum indicum]                                           |
| c37891.graph_c0 | 0.02624142    | 0.07880308    | 0.10116378    | 0.74381232     | 0.56827082     | 0.96488657     | 2.224E-05 | 2.36427  | up        | PREDICTED: receptor-like serine/threonine-protein kinase NCRK isoform X1 [Sesamum indicum]                   |

| #ID             | 0 h-1<br>FPKM | 0 h-2<br>FPKM | 0 h-3<br>FPKM | 28 h-1<br>FPKM | 28 h-2<br>FPKM | 28 h-3<br>FPKM | FDR       | log2FC   | regulated | nr_annotation                                                                                        |
|-----------------|---------------|---------------|---------------|----------------|----------------|----------------|-----------|----------|-----------|------------------------------------------------------------------------------------------------------|
| c37892.graph_c0 | 2.56655709    | 2.47031452    | 2.9175743     | 1.14791317     | 1.03645796     | 0.58542986     | 5.566E-11 | -2.61694 | down      | PREDICTED: serine/threonine-protein kinase BLUS1-like isoform X2 [Sesamum indicum]                   |
| c37893.graph_c0 | 0.28549307    | 0.50805146    | 0.7337398     | 4.51877386     | 5.32901762     | 4.87248053     | 1.003E-13 | 2.16755  | up        | PREDICTED: riboflavin biosynthesis protein PYRD, chloroplastic [Sesamum indicum]                     |
| c37897.graph_c0 | 5.40577053    | 7.24894405    | 5.63594441    | 5.63386977     | 5.68924704     | 7.19823441     | 6.879E-05 | -1.07089 | down      | hypothetical protein MIMGU_mgv11b019655mg [Erythranthe outtata]                                      |
| c37897.graph_c1 | 8.00774592    | 8.6694105     | 6.7129662     | 5.64513429     | 6.20213461     | 6.40001953     | 1.979E-19 | -1.446   | down      | PREDICTED: CBL-interacting serine/threonine-protein kinase 11-like [Sesamum indicum]                 |
| c37899.graph_c0 | 0.11160091    | 0.13405519    | 0.02868232    | 1.08688604     | 1.27429833     | 1.20458212     | 7.427E-08 | 2.62251  | up        | PREDICTED: G-type lectin S-receptor-like serine/threonine-protein kinase At1g34300 [Sesamum indicum] |
| c37902.graph_c0 | 18.9312674    | 21.0384032    | 18.831976     | 20.3923283     | 20.8080208     | 19.4545414     | 2.943E-20 | -1.04569 | down      | PREDICTED: small nuclear ribonucleoprotein-associated protein N-like [Sesamum indicum]               |
| c37904.graph_c0 | 13.9875966    | 14.6051205    | 12.3962865    | 7.62457847     | 6.80514983     | 10.2262978     | 2.098E-17 | -1.8203  | down      | PREDICTED: uncharacterized protein LOC105164967 [Sesamum indicum]                                    |
| c37905.graph_c0 | 2.95536001    | 2.23872816    | 3.38718656    | 11.1460599     | 12.7894723     | 13.5005299     | 3.083E-05 | 1.03233  | up        | PREDICTED: uncharacterized protein LOC104093968 [Nicotiana tomentosiformis]                          |
| c37906.graph_c0 | 7.41778373    | 6.69800008    | 6.43665513    | 35.5708204     | 29.9843385     | 32.4496008     | 2.459E-20 | 1.16471  | up        | PREDICTED: protein TRANSPORT INHIBITOR RESPONSE 1-like [Sesamum indicum]                             |
| c37908.graph_c0 | 0.64828552    | 0.58404121    | 0.54149716    | 3.9107125      | 3.47782891     | 3.35450964     | 9.616E-11 | 1.50967  | up        | PREDICTED: pentatricopeptide repeat-containing protein ELI1, chloroplastic [Sesamum indicum]         |
| c37916.graph_c0 | 92.6675273    | 94.2689492    | 97.8823277    | 61.9622068     | 64.4194995     | 65.4655396     | 1.495E-87 | -1.66119 | down      | PREDICTED: protein DJ-1 homolog B [Sesamum indicum]                                                  |
| c37916.graph_c1 | 0             | 0             | 0             | 4.10915413     | 3.56177368     | 3.15185404     | 4.025E-14 | Inf      | up        | PREDICTED: probable calcium-binding protein CML47 [Sesamum indicum]                                  |
| c37918.graph_c0 | 32.7384782    | 34.5541533    | 33.4600101    | 20.4346024     | 19.0905936     | 19.3152216     | 6.081E-86 | -1.86666 | down      | hypothetical protein MIMGU_mgv1a0089/1mg [Erythranthe outtata]                                       |
| c37919.graph_c0 | 0.03302333    | 0.09916919    | 0.29705399    | 10.2004949     | 10.4886678     | 9.96863991     | 6.58E-58  | 5.04439  | up        | PREDICTED: uncharacterized protein LOC104231484 isoform X1 [Nicotiana glauca]                        |
| c37920.graph_c0 | 0.46892763    | 0.19558216    | 0.35151116    | 3.06732508     | 3.97475535     | 3.70801809     | 1.282E-09 | 2.31508  | up        | PREDICTED: squamosa promoter-binding-like protein 16 isoform X1 [Nicotiana tomentosiformis]          |
| c37921.graph_c0 | 13.9914072    | 15.0682232    | 14.1592449    | 14.6959952     | 13.362005      | 14.3705846     | 1.403E-30 | -1.11691 | down      | PREDICTED: uncharacterized protein LOC105178567 [Sesamum indicum]                                    |
| c37925.graph_c0 | 19.3854976    | 17.7188587    | 19.4015609    | 18.1847265     | 19.2929485     | 18.8524537     | 4.337E-29 | -1.09534 | down      | PREDICTED: transcription factor RF2b-like [Sesamum indicum]                                          |
| c37926.graph_c0 | 1.5109383     | 1.47727799    | 1.62553858    | 9.75558037     | 10.8144701     | 9.94017293     | 1.255E-15 | 1.63341  | up        | PREDICTED: uncharacterized protein C630.12 isoform X1 [Sesamum indicum]                              |
| c37927.graph_c0 | 7.06482747    | 7.18460145    | 7.19776103    | 38.4384701     | 35.1681006     | 37.3080589     | 4.253E-37 | 1.27999  | up        | PREDICTED: sphingosine-1-phosphate lyase [Sesamum indicum]                                           |
| c37931.graph_c0 | 0.58076952    | 0.89438626    | 0.74631182    | 0.7467922      | 0.60099167     | 0.86107525     | 0.0015524 | -1.0991  | down      | hypothetical protein MIMGU_mgv1a001348mg [Erythranthe outtata]                                       |
| c37932.graph_c0 | 43.620691     | 45.3524261    | 41.5206447    | 33.2720883     | 33.1106567     | 32.4703571     | 1.037E-74 | -1.49051 | down      | PREDICTED: serine/threonine-protein kinase WNK8-like isoform X1 [Sesamum indicum]                    |

| #ID             | 0 h-1<br>FPKM | 0 h-2<br>FPKM | 0 h-3<br>FPKM | 28 h-1<br>FPKM | 28 h-2<br>FPKM | 28 h-3<br>FPKM | FDR       | log2FC   | regulated | nr_annotation                                                                                     |
|-----------------|---------------|---------------|---------------|----------------|----------------|----------------|-----------|----------|-----------|---------------------------------------------------------------------------------------------------|
| c37933.graph_c0 | 119.012437    | 121.993927    | 117.457654    | 51.7050412     | 52.9612092     | 54.1201248     | 7.04E-165 | -2.2649  | down      | PREDICTED: protein PPLZ12 [Sesamum indicum]                                                       |
| c37935.graph_c0 | 1.1858099     | 1.02659227    | 1.11197141    | 1.05983003     | 1.00950556     | 0.95034357     | 1.598E-06 | -1.22913 | down      | PREDICTED: uncharacterized protein LOC105178399 [Sesamum indicum]                                 |
| c37936.graph_c0 | 0.11044925    | 0.38695946    | 0.21289748    | 2.64903792     | 2.06567384     | 1.83407917     | 1.133E-05 | 2.11091  | up        | -                                                                                                 |
| c37937.graph_c0 | 1.72103201    | 0.77934171    | 1.05314013    | 0              | 0              | 0              | 1.355E-12 | -Inf     | down      | Mitochondrial uncoupling protein 3 [Aegilops tauschii]                                            |
| c37938.graph_c1 | 0             | 0             | 0             | 2.01864819     | 2.08302863     | 1.83545192     | 8.377E-21 | Inf      | up        | PREDICTED: chromosome-associated kinesin KIF4A [Sesamum indicum]                                  |
| c37943.graph_c1 | 4.81558472    | 5.28390745    | 3.86763564    | 2.82687398     | 4.34516083     | 3.15799048     | 2.079E-11 | -1.52371 | down      | hypothetical protein MIMGU_mgv1a008064mg [Erythranthe outtata]                                    |
| c37947.graph_c0 | 0.46530971    | 0.98330414    | 0.5979414     | 5.29822251     | 4.93081797     | 5.63154083     | 1.177E-17 | 1.8638   | up        | PREDICTED: pentatricopeptide repeat-containing protein At5g57250, mitochondrial [Sesamum indicum] |
| c37953.graph_c0 | 127.815646    | 127.108393    | 128.669186    | 57.1156788     | 61.0528293     | 64.1731232     | 7.96E-152 | -2.16325 | down      | PREDICTED: uncharacterized protein LOC105167724 [Sesamum indicum]                                 |
| c37954.graph_c0 | 1.97482734    | 2.56012428    | 1.66408611    | 12.611756      | 15.8061595     | 12.4990663     | 1.398E-12 | 1.63407  | up        | PREDICTED: O-acyltransferase WSD1-like isoform X1 [Sesamum indicum]                               |
| c37955.graph_c0 | 1.8305107     | 1.79641537    | 1.93717071    | 11.0997484     | 11.0937183     | 10.7069893     | 2.129E-26 | 1.47234  | up        | hypothetical protein MIMGU_mgv1a024346mg [Erythranthe outtata]                                    |
| c37960.graph_c0 | 1043.70309    | 1022.36532    | 1039.80801    | 81.7585336     | 60.2133103     | 89.6728932     | 0         | -4.83416 | down      | Gibberellin 2-beta-dioxygenase 1 GN=GA2OX1 OS=Pisum sativum (Garden pea) PE=1 SV=1                |
| c37966.graph_c0 | 4.23292668    | 2.93342214    | 3.48684511    | 2.28762909     | 2.27918851     | 2.28508194     | 2.964E-10 | -1.72552 | down      | -                                                                                                 |
| c37969.graph_c0 | 0.21115021    | 0.04696926    | 0.09044546    | 1.31295915     | 1.5241873      | 1.32181266     | 5.63E-08  | 2.49547  | up        | PREDICTED: uncharacterized protein At5g41620 [Sesamum indicum]                                    |
| c37971.graph_c0 | 46.3680145    | 48.7252638    | 44.4978457    | 36.6241883     | 39.8203554     | 39.2730088     | 7.652E-47 | -1.36041 | down      | PREDICTED: protein vip1-like [Sesamum indicum]                                                    |
| c37976.graph_c0 | 2.67979769    | 2.10471594    | 1.85427099    | 18.9072987     | 17.8561044     | 16.7974237     | 3.134E-27 | 1.9255   | up        | PREDICTED: ninja-family protein AFP1-like [Sesamum indicum]                                       |
| c37977.graph_c0 | 11.6354543    | 10.7115949    | 11.6493645    | 94.4148412     | 96.1337029     | 107.110188     | 2.537E-57 | 2.03996  | up        | PREDICTED: glutathione S-transferase L3-like [Malus domestica]                                    |
| c37980.graph_c0 | 0.95162421    | 1.25339095    | 1.22287479    | 17.6912951     | 17.5512184     | 17.8221634     | 1.88E-38  | 2.85947  | up        | PREDICTED: methionine adenosyltransferase 2 subunit beta [Sesamum indicum]                        |
| c37983.graph_c0 | 0.83883291    | 0.77249904    | 0.51740808    | 5.90149839     | 5.85694598     | 6.42739901     | 4.836E-13 | 2.01044  | up        | PREDICTED: cytochrome P450 71D11-like [Sesamum indicum]                                           |
| c37985.graph_c0 | 4.30828312    | 3.27757388    | 4.5397778     | 2.31711415     | 1.69632716     | 2.14625247     | 2.871E-10 | -2.0686  | down      | PREDICTED: uncharacterized protein LOC10026301 [Vitis vinifera]                                   |
| c37985.graph_c1 | 2.69168717    | 2.31716894    | 2.69796117    | 1.7215464      | 1.87233941     | 2.1071517      | 1.05E-06  | -1.52521 | down      | hypothetical protein MIMGU_mgv1a007684mg [Erythranthe outtata]                                    |
| c37986.graph_c0 | 1.58161942    | 1.93861613    | 1.74209449    | 1.26680901     | 0.72017652     | 0.4211394      | 3.03E-13  | -2.22178 | down      | PREDICTED: tonoplast dicarboxylate transporter [Sesamum indicum]                                  |
| c37987.graph_c0 | 5.0978445     | 5.50581363    | 4.82700253    | 0.68251547     | 1.58463638     | 1.35253713     | 6.161E-17 | -3.18128 | down      | -                                                                                                 |
| c37991.graph_c0 | 107.092761    | 106.998747    | 119.877889    | 64.8782372     | 66.0112815     | 72.613802      | 2.077E-33 | -1.80626 | down      | hypothetical protein EUTSA_v10023737mg [Eutrema salsugineum]                                      |
| c37996.graph_c0 | 0.07062959    | 0             | 0.09076183    | 2.15599366     | 2.17840539     | 2.76457221     | 2.223E-11 | 4.36077  | up        | unnamed protein product [Coffea canephora]                                                        |
| c37997.graph_c0 | 4.02702729    | 4.03105975    | 4.15268911    | 23.9565656     | 23.881674      | 24.5607624     | 1.786E-21 | 1.47699  | up        | PREDICTED: mitochondrial inner membrane protease subunit 2-like isoform X1 [Sesamum indicum]      |
| c38000.graph_c0 | 0.06897801    | 0.20714124    | 0.17727894    | 1.17812123     | 0.97320254     | 0.87952136     | 0.000432  | 1.64269  | up        | hypothetical protein MIMGU_mgv1a004734mg [Erythranthe outtata]                                    |

| #ID             | 0 h-1<br>FPKM | 0 h-2<br>FPKM | 0 h-3<br>FPKM | 28 h-1<br>FPKM | 28 h-2<br>FPKM | 28 h-3<br>FPKM | FDR       | log2FC   | regulated | nr_annotation                                                                                     |
|-----------------|---------------|---------------|---------------|----------------|----------------|----------------|-----------|----------|-----------|---------------------------------------------------------------------------------------------------|
| c38007.graph_c0 | 1.53917311    | 1.40064942    | 1.43847155    | 19.118953      | 16.6198648     | 18.0904164     | 1.462E-13 | 2.53023  | up        | -                                                                                                 |
| c38008.graph_c0 | 1.04353948    | 0.81750086    | 1.04947008    | 5.40799612     | 5.44861683     | 4.92412904     | 8.444E-06 | 1.34703  | up        | PREDICTED: uncharacterized protein LOC105167885 [Sesamum indicum]                                 |
| c38010.graph_c0 | 17.3164442    | 19.0637367    | 14.7322648    | 10.9687784     | 9.92623605     | 9.97536991     | 3.505E-25 | -1.81579 | down      | PREDICTED: tyrosine-sulfated glycopeptide receptor 1 [Sesamum indicum]                            |
| c38012.graph_c0 | 0.07426168    | 0.07433604    | 0.06361946    | 3.36431445     | 3.6711833      | 3.42055603     | 8.923E-26 | 4.53391  | up        | PREDICTED: uncharacterized protein LOC105173003 [Sesamum indicum]                                 |
| c38014.graph_c0 | 0.12532598    | 0.06272574    | 0.08052442    | 3.37018934     | 3.74202451     | 4.60818683     | 4.126E-14 | 4.36285  | up        | acyl-CoA thioesterase, putative [Ricinus communis]                                                |
| c38015.graph_c0 | 13.0393057    | 9.841621      | 13.9782875    | 55.2903178     | 59.851458      | 58.4322097     | 4.842E-19 | 1.14311  | up        | PREDICTED: protein yippee-like [Sesamum indicum]                                                  |
| c38018.graph_c0 | 5.59850988    | 6.80499792    | 6.42348825    | 5.9581269      | 5.77326142     | 6.8776441      | 0.0017803 | -1.10773 | down      | -                                                                                                 |
| c38021.graph_c0 | 36.3865117    | 37.6805789    | 37.6610791    | 28.5351586     | 27.2390991     | 26.7090626     | 1.872E-74 | -1.52889 | down      | hypothetical protein MIMGU_mgv1a011020mg [Erythranthe outtata]                                    |
| c38024.graph_c0 | 2.48134812    | 2.61882373    | 2.01022363    | 14.3294236     | 19.7346245     | 16.6352946     | 3.235E-12 | 1.74585  | up        | PREDICTED: lysine histidine transporter 1-like [Solanum tuberosum]                                |
| c38028.graph_c0 | 0.23139901    | 0.32428301    | 0.05947138    | 3.83449189     | 4.58587882     | 5.24230339     | 7.783E-15 | 3.39616  | up        | hypothetical protein MIMGU_mgv1a013594mg [Erythranthe outtata]                                    |
| c38030.graph_c0 | 7.49861061    | 7.22017193    | 8.25943845    | 116.213631     | 127.612517     | 119.690849     | 7.87E-151 | 2.89152  | up        | PREDICTED: serine/threonine-protein kinase Nek6-like [Sesamum indicum]                            |
| c38031.graph_c0 | 20.1300671    | 17.3326082    | 18.304851     | 13.0805844     | 12.9020368     | 12.8741419     | 2.826E-46 | -1.61097 | down      | PREDICTED: uncharacterized protein LOC105175857 [Sesamum indicum]                                 |
| c38035.graph_c0 | 14.3065347    | 16.2534334    | 14.5040058    | 2.19471393     | 2.2739912      | 1.70279314     | 3.38E-133 | -3.9599  | down      | hypothetical protein MIMGU_mgv1a008950mg [Erythranthe outtata]                                    |
| c38036.graph_c0 | 7.77892878    | 6.96149534    | 6.68226342    | 3.50282385     | 2.99626249     | 3.4600179      | 1.965E-63 | -2.19344 | down      | PREDICTED: pentatricopeptide repeat-containing protein At1g74900, mitochondrial [Sesamum indicum] |
| c38041.graph_c0 | 85.7662091    | 92.3659067    | 84.0673572    | 71.9825009     | 69.17831       | 68.7967996     | 1.361E-67 | -1.41072 | down      | hypothetical protein MIMGU_mgv1a027042mg [Erythranthe outtata]                                    |
| c38045.graph_c0 | 20.2820253    | 18.6030203    | 21.1835305    | 11.1692853     | 10.6418277     | 11.8429604     | 3.041E-47 | -1.92679 | down      | PREDICTED: cyclin-dependent kinase inhibitor 3 isoform X2 [Sesamum indicum]                       |
| c38047.graph_c0 | 297.951936    | 281.049148    | 303.908687    | 54.6842802     | 61.2247245     | 62.8161566     | 2.14E-209 | -3.39522 | down      | PREDICTED: uncharacterized protein C6C3.02c-like [Matis domestica]                                |
| c38050.graph_c0 | 8.38721558    | 12.3935256    | 7.18526939    | 1.54813459     | 1.6599117      | 1.5001274      | 7.465E-11 | -3.65837 | down      | Ethylene-responsive transcription factor 1B [Theobroma cacao]                                     |
| c38051.graph_c0 | 4.08551253    | 3.13167839    | 3.216244      | 16.8529368     | 16.3035234     | 15.650925      | 4.267E-13 | 1.13763  | up        | PREDICTED: cysteine desulfurase 2, chloroplastic isoform X1 [Sesamum indicum]                     |
| c38054.graph_c0 | 23.770779     | 21.510302     | 22.2377735    | 20.9621111     | 20.8403017     | 20.4883006     | 1.722E-24 | -1.2063  | down      | PREDICTED: proline synthase co-transcribed bacterial homolog protein, partial [Sesamum indicum]   |
| c38063.graph_c1 | 798.182712    | 762.336116    | 876.599721    | 259.154691     | 305.141838     | 323.965661     | 1.84E-49  | -2.54755 | down      | PREDICTED: peroxygenase-like [Nicotiana tomentosiformis]                                          |
| c38064.graph_c0 | 96.6655172    | 98.582478     | 91.1291209    | 89.0988569     | 88.1847708     | 81.6093026     | 1.326E-51 | -1.23566 | down      | PREDICTED: ubiquitin-conjugating enzyme E2 32-like [Sesamum indicum]                              |
| c38065.graph_c1 | 0.45008328    | 0.09010679    | 0.23134994    | 2.5515199      | 1.94935505     | 2.0820194      | 3.282E-05 | 2.00951  | up        | PREDICTED: nudix hydrolase 16, mitochondrial-like [Sesamum indicum]                               |
| c38066.graph_c0 | 103.788976    | 96.7965648    | 98.691183     | 509.863547     | 511.491839     | 515.5839       | 3.148E-58 | 1.27048  | up        | RecName: Full=40S ribosomal protein S7 [Avicennia marina]                                         |



| #ID             | 0 h-1<br>FPKM | 0 h-2<br>FPKM | 0 h-3<br>FPKM | 28 h-1<br>FPKM | 28 h-2<br>FPKM | 28 h-3<br>FPKM | FDR       | log2FC   | regulated | nr_annotation                                                                                                    |
|-----------------|---------------|---------------|---------------|----------------|----------------|----------------|-----------|----------|-----------|------------------------------------------------------------------------------------------------------------------|
| c38067.graph_c0 | 0.56454144    | 0.79533542    | 0.69858929    | 7.65903537     | 7.76609368     | 6.37371251     | 4.917E-29 | 2.31154  | up        | PREDICTED: LOW QUALITY PROTEIN: auxin response factor 19-like [Sesamum indicum]                                  |
| c38068.graph_c0 | 4.17200056    | 3.57420656    | 2.60814449    | 2.29462722     | 2.244486       | 2.74172428     | 2.2E-07   | -1.59209 | down      | hypothetical protein MIMGU_mgv1a007990mg [Erythranthe outtata]                                                   |
| c38071.graph_c0 | 1.1213697     | 1.06013189    | 1.32092076    | 22.1409702     | 22.7711853     | 19.6001317     | 4.503E-80 | 3.10949  | up        | PREDICTED: calcium-dependent protein kinase 26-like isoform X1 [Sesamum indicum]                                 |
| c38072.graph_c0 | 0.08360128    | 0.20084399    | 0.21486191    | 7.42498562     | 7.65865461     | 7.81387459     | 1.567E-75 | 4.42026  | up        | Lysosomal alpha-mannosidase [Glycine soja]                                                                       |
| c38075.graph_c0 | 18.112022     | 18.0124302    | 16.9270294    | 5.06033652     | 4.58444526     | 4.33844293     | 7.34E-187 | -3.01377 | down      | PREDICTED: MAPK-binding filament-like protein 1 [Sesamum indicum]                                                |
| c38078.graph_c0 | 26.2758557    | 30.3710106    | 25.8837856    | 195.851199     | 224.515299     | 170.467178     | 6.571E-19 | 1.74873  | up        | PREDICTED: polyol transporter 5-like [Sesamum indicum]                                                           |
| c38081.graph_c0 | 0.17729124    | 0.22183597    | 0.39869597    | 9.18086565     | 8.75483413     | 7.91208747     | 7.006E-31 | 3.91612  | up        | hypothetical protein VITISV_034764 [Vitis vinifera]                                                              |
| c38083.graph_c0 | 2.24485664    | 2.56065399    | 2.91827302    | 26.2755253     | 22.6965668     | 22.6945417     | 1.484E-43 | 2.12001  | up        | PREDICTED: lysosomal beta glucosidase-like [Sesamum indicum]                                                     |
| c38085.graph_c0 | 0.07725753    | 0.07733489    | 0             | 2.97596721     | 2.99121024     | 2.52000135     | 1.23E-11  | 4.70762  | up        | PREDICTED: uncharacterized protein LOC105176978 [Sesamum indicum]                                                |
| c38086.graph_c0 | 0.32431482    | 0.23188541    | 0.31752944    | 5.331539       | 5.9084041      | 5.33049792     | 2.188E-43 | 3.15376  | up        | PREDICTED: calcium-transporting ATPase, endoplasmic reticulum-type [Sesamum indicum]                             |
| c38087.graph_c0 | 0.34216005    | 0.30444682    | 0.26869896    | 4.57294805     | 4.32852972     | 4.74609232     | 9.097E-26 | 2.81092  | up        | hypothetical protein MIMGU_mgv1a023205mg [Erythranthe outtata]                                                   |
| c38089.graph_c0 | 46.9909455    | 41.5770028    | 43.1828002    | 21.2246836     | 18.2011916     | 19.439883      | 3.59E-130 | -2.25199 | down      | RING/U-box superfamily protein isoform 1 [Theobroma cacao]                                                       |
| c38090.graph_c0 | 0.14321456    | 0.19114396    | 0.10224243    | 1.27218077     | 1.46193086     | 1.24570695     | 8.406E-08 | 2.10195  | up        | PREDICTED: DNA (cytosine-5)-methyltransferase CMT2 [Sesamum indicum]                                             |
| c38091.graph_c0 | 2.70131736    | 1.73057428    | 2.29105784    | 18.4943038     | 18.932196      | 19.2565005     | 5.366E-24 | 1.98649  | up        | unnamed protein product [Coffea canephora]                                                                       |
| c38093.graph_c0 | 10.6724823    | 10.4568309    | 11.15761      | 6.44200395     | 6.884867       | 7.99221194     | 1.295E-29 | -1.68918 | down      | PREDICTED: transcription intermediary factor 1-alpha isoform X1 [Sesamum indicum]                                |
| c38094.graph_c0 | 23.2188981    | 23.9118373    | 22.9594751    | 18.5628975     | 22.5712264     | 17.5744547     | 8.253E-42 | -1.34688 | down      | PREDICTED: beta-D-glucosyl crocetin beta-1,6-glucosyltransferase-like [Sesamum indicum]                          |
| c38097.graph_c0 | 0.99420141    | 0.89224554    | 0.68284885    | 16.6940862     | 18.6615149     | 16.3771832     | 1.11E-112 | 3.24514  | up        | PREDICTED: uncharacterized protein LOC105172430 [Sesamum indicum]                                                |
| c38098.graph_c0 | 0.07345591    | 0.02450982    | 0.15732291    | 2.36683826     | 2.76368182     | 2.3088721      | 1.337E-17 | 3.75897  | up        | PREDICTED: pentatricopeptide repeat-containing protein At2g37310 [Sesamum indicum]                               |
| c38099.graph_c0 | 0.71092767    | 0.75908219    | 0.79176084    | 3.5135473      | 3.39011777     | 3.34486356     | 0.0023446 | 1.08798  | up        | -                                                                                                                |
| c38100.graph_c0 | 0.48094641    | 0.44439509    | 0.42787051    | 2.90394622     | 2.96187891     | 1.98563402     | 3.21E-06  | 1.4456   | up        | PREDICTED: DNA-binding protein SMUBP-2 [Sesamum indicum]                                                         |
| c38101.graph_c0 | 2.70077739    | 3.28409535    | 3.21438664    | 15.4859063     | 14.9874309     | 15.0228255     | 3.664E-39 | 1.21389  | up        | PREDICTED: uncharacterized protein At3g06530 [Sesamum indicum]                                                   |
| c38102.graph_c0 | 0.38793186    | 0.20135127    | 0.24002227    | 8.91786774     | 8.77799829     | 7.69443471     | 2.011E-84 | 3.85022  | up        | PREDICTED: histidine kinase 1 [Sesamum indicum]                                                                  |
| c38104.graph_c0 | 2.40196804    | 1.72434849    | 2.21363946    | 12.7491668     | 12.355146      | 12.6047264     | 5.763E-23 | 1.48211  | up        | PREDICTED: probable sulfate transporter 3.3 [Sesamum indicum]                                                    |
| c38107.graph_c0 | 21.9477474    | 24.4785408    | 22.3944194    | 21.1608431     | 21.0430138     | 21.2678134     | 4.474E-43 | -1.20717 | down      | PREDICTED: uncharacterized aarF domain-containing protein kinase At1g79600, chloroplastic-like [Citrus sinensis] |

| #ID             | 0 h-1<br>FPKM | 0 h-2<br>FPKM | 0 h-3<br>FPKM | 28 h-1<br>FPKM | 28 h-2<br>FPKM | 28 h-3<br>FPKM | FDR       | log2FC   | regulated | nr_annotation                                                                                              |
|-----------------|---------------|---------------|---------------|----------------|----------------|----------------|-----------|----------|-----------|------------------------------------------------------------------------------------------------------------|
| c38114.graph_c0 | 33.3256603    | 33.6683882    | 35.7424856    | 14.225566      | 13.5879727     | 12.5549097     | 2.2E-109  | -2.43955 | down      | PREDICTED: iron-sulfur assembly protein IscA-like 2, mitochondrial isoform X1 [Sesamum indicum]            |
| c38115.graph_c0 | 25.058219     | 22.2678373    | 22.3434147    | 14.123723      | 10.0676823     | 13.4961973     | 3.677E-16 | -1.97495 | down      | PREDICTED: pyrophosphate--fructose 6-phosphate 1-phosphotransferase subunit alpha 2 [Tarenaya hassleriana] |
| c38119.graph_c0 | 1.17797579    | 1.23530561    | 1.0812468     | 6.1316362      | 5.41849914     | 5.80177439     | 8.411E-17 | 1.22277  | up        | PREDICTED: uncharacterized protein LOC105168860 isoform X1 [Sesamum indicum]                               |
| c38120.graph_c0 | 0.39415893    | 0.49976792    | 0.77664841    | 4.6599517      | 4.89725348     | 4.92452656     | 2.635E-14 | 2.01676  | up        | PREDICTED: pentatricopeptide repeat-containing protein At1g73400, mitochondrial [Sesamum indicum]          |
| c38123.graph_c0 | 1.30693137    | 1.04659205    | 1.59548563    | 9.49870188     | 10.6776643     | 11.4325232     | 7.389E-12 | 1.90721  | up        | -                                                                                                          |
| c38138.graph_c0 | 6.80330923    | 5.78860345    | 6.19261954    | 29.13197       | 29.3169855     | 24.8473851     | 4.854E-13 | 1.05822  | up        | PREDICTED: xanthoxin dehydrogenase-like [Malus domestica]                                                  |
| c38142.graph_c0 | 2.88268274    | 1.79546535    | 1.72870201    | 16.295356      | 17.4456261     | 16.2221905     | 1.56E-16  | 1.87812  | up        | PREDICTED: uncharacterized protein LOC105179724 [Sesamum indicum]                                          |
| c38148.graph_c0 | 11.0669437    | 7.9761784     | 10.4527737    | 63.2210524     | 60.3870874     | 63.8941274     | 1.872E-47 | 1.57788  | up        | PREDICTED: eukaryotic translation initiation factor 3 subunit K [Sesamum indicum]                          |
| c38149.graph_c0 | 43.1585196    | 42.2047732    | 39.7288489    | 14.748693      | 17.782815      | 17.5723037     | 5.06E-149 | -2.4093  | down      | PREDICTED: homeobox-leucine zipper protein HAT4-like [Sesamum indicum]                                     |
| c38152.graph_c0 | 0.23631917    | 0.2183592     | 0.30367948    | 2.86699411     | 3.03000565     | 2.7814585      | 1.29E-15  | 2.42184  | up        | PREDICTED: serine/threonine-protein kinase-like protein ACR4 [Sesamum indicum]                             |
| c38154.graph_c0 | 24.6763553    | 25.8760345    | 25.8480114    | 18.7295733     | 18.9242687     | 19.0644208     | 4.135E-64 | -1.52074 | down      | squalene epoxidase [Withania somnifera]                                                                    |
| c38155.graph_c0 | 1.89042535    | 2.28191328    | 2.2863731     | 13.0121171     | 12.1135889     | 11.3761942     | 6.199E-10 | 1.40578  | up        | PREDICTED: glucuronoxylan 4-O-methyltransferase 1-like [Sesamum indicum]                                   |
| c38156.graph_c0 | 18.1328602    | 17.5141397    | 17.7145475    | 12.3824751     | 12.177619      | 12.1583385     | 5.208E-52 | -1.62967 | down      | PREDICTED: mitogen-activated protein kinase 9-like [Sesamum indicum]                                       |
| c38161.graph_c0 | 7.51549101    | 7.21734102    | 7.12882402    | 2.47834159     | 2.25997586     | 2.48512291     | 8.06E-105 | -2.68729 | down      | PREDICTED: uncharacterized protein LOC105168894 [Sesamum indicum]                                          |
| c38166.graph_c0 | 21.7951588    | 22.3415785    | 20.6392949    | 12.6366281     | 12.1278535     | 11.3260695     | 5.91E-114 | -1.93398 | down      | hypothetical protein MIMGU_mgv1a00145/mg [Erythranthe guttata]                                             |
| c38167.graph_c0 | 3.88114464    | 3.30227637    | 4.05228243    | 0              | 0              | 0              | 1.799E-68 | -Inf     | down      | -                                                                                                          |
| c38168.graph_c0 | 17.9023545    | 16.7508193    | 18.3688627    | 17.881211      | 16.7764279     | 17.831085      | 1.21E-26  | -1.10548 | down      | hypothetical protein MIMGU_mgv1a012288mg [Erythranthe guttata]                                             |
| c38169.graph_c0 | 0.25023633    | 0.15655431    | 0.04019545    | 2.43251552     | 2.21685992     | 2.20751984     | 4.194E-10 | 2.86567  | up        | PREDICTED: nudix hydrolase 8-like isoform X3 [Sesamum indicum]                                             |
| c38175.graph_c0 | 3.72770066    | 3.01951518    | 3.27753464    | 15.310948      | 14.7255887     | 15.5770137     | 7.066E-17 | 1.09674  | up        | PREDICTED: protein CASP isoform X1 [Sesamum indicum]                                                       |
| c38176.graph_c0 | 44.8262197    | 46.266063     | 38.3824138    | 30.3512071     | 31.2756462     | 29.3669804     | 4.746E-44 | -1.59754 | down      | PREDICTED: probable protein phosphatase 2C 9 [Sesamum indicum]                                             |
| c38180.graph_c0 | 1.50999059    | 1.42594586    | 1.09833831    | 1.40805221     | 0.95350434     | 1.53757762     | 0.0001019 | -1.13415 | down      | PREDICTED: polyadenylate-binding protein 7-like [Sesamum indicum]                                          |
| c38182.graph_c0 | 4.25202691    | 4.93729022    | 3.9340965     | 95.5535803     | 103.0735       | 91.6385512     | 5.92E-201 | 3.37759  | up        | PREDICTED: homeobox-leucine zipper protein ATHB-6 [Sesamum indicum]                                        |
| c38184.graph_c0 | 1.26098834    | 1.61287632    | 1.44037329    | 6.36443793     | 8.20598875     | 7.58226089     | 2.285E-08 | 1.26877  | up        | hypothetical protein CICLE_v10008173mg [Citrus clementina]                                                 |

| #ID             | 0 h-1<br>FPKM | 0 h-2<br>FPKM | 0 h-3<br>FPKM | 28 h-1<br>FPKM | 28 h-2<br>FPKM | 28 h-3<br>FPKM | FDR       | log2FC   | regulated | nr_annotation                                                                                                |
|-----------------|---------------|---------------|---------------|----------------|----------------|----------------|-----------|----------|-----------|--------------------------------------------------------------------------------------------------------------|
| c38185.graph_c0 | 3.73059573    | 4.04552563    | 4.26130063    | 2.25947956     | 1.97209492     | 1.96663133     | 4.121E-09 | -2.04991 | down      | -                                                                                                            |
| c38187.graph_c0 | 5.23422477    | 5.12832587    | 5.07521312    | 24.358436      | 23.5859006     | 24.7301245     | 2.306E-33 | 1.14497  | up        | PREDICTED: RRP12-like protein [Sesamum indicum]                                                              |
| c38190.graph_c0 | 311.498325    | 330.084368    | 288.486018    | 18.0466655     | 16.5457752     | 24.8334478     | 0         | -5.05566 | down      | PREDICTED: early nodulin-like protein 2 [Sesamum indicum]                                                    |
| c38193.graph_c0 | 7.60540689    | 7.02989742    | 7.07000989    | 37.7991421     | 36.6563748     | 37.3119666     | 1.169E-33 | 1.27463  | up        | PREDICTED: dolichyl-diphosphooligosaccharide--protein glycosyltransferase subunit 1B [Sesamum indicum]       |
| c38200.graph_c0 | 6.98927563    | 6.19585312    | 6.85029349    | 2.86274906     | 3.69256285     | 2.63456375     | 1.478E-43 | -2.21631 | down      | hypothetical protein MIMGU_mgv1a00525/mg [Erythranthe outtata]                                               |
| c38202.graph_c0 | 0             | 0             | 0             | 1.37731133     | 1.9897328      | 3.66062077     | 2.089E-05 | Inf      | up        | --                                                                                                           |
| c38204.graph_c0 | 0             | 0.15686325    | 0.30206075    | 2.448705       | 2.67370822     | 2.09105925     | 4.656E-08 | 2.85957  | up        | PREDICTED: uncharacterized protein LOC105164617 isoform X2 [Sesamum indicum]                                 |
| c38206.graph_c0 | 0.21455029    | 0             | 0.0689264     | 3.58647998     | 4.57579533     | 4.19894637     | 7.366E-16 | 4.36982  | up        | PREDICTED: putative UDP-glucuronate:xylan alpha-glucuronosyltransferase 4 [Sesamum indicum]                  |
| c38207.graph_c1 | 0.24440056    | 0.3844426     | 0.44866342    | 1.70016249     | 2.49738087     | 2.17415619     | 0.0001457 | 1.46681  | up        | PREDICTED: uncharacterized permease C29B12.14c [Sesamum indicum]                                             |
| c38208.graph_c0 | 0.93758288    | 0.7647214     | 1.16020774    | 4.8204851      | 4.36383992     | 4.91169707     | 5.082E-10 | 1.20615  | up        | PREDICTED: pentatricopeptide repeat-containing protein At2g26790, mitochondrial isoform X1 [Sesamum indicum] |
| c38209.graph_c0 | 0.14603641    | 0.19491019    | 0.18766257    | 2.37042473     | 2.90693562     | 3.40658466     | 7.579E-10 | 2.94629  | up        | PREDICTED: 1-complex protein 1 subunit epsilon [Sesamum indicum]                                             |
| c38212.graph_c0 | 39.3199978    | 41.4080447    | 39.609296     | 16.2269987     | 14.203775      | 14.4916466     | 9.12E-127 | -2.51218 | down      | hypothetical protein MIMGU_mgv1a000/68mg [Erythranthe outtata]                                               |
| c38212.graph_c1 | 17.5635205    | 20.3617931    | 19.6910158    | 3.25639426     | 4.0575018      | 2.81662259     | 1.577E-83 | -3.60078 | down      | PREDICTED: uncharacterized protein At4g14450, chloroplastic-like [Sesamum indicum]                           |
| c38217.graph_c0 | 112.276987    | 111.548597    | 112.617847    | 19.5102677     | 20.7624667     | 20.6942092     | 0         | -3.5548  | down      | PREDICTED: dnaJ protein homolog [Sesamum indicum]                                                            |
| c38218.graph_c0 | 3.28902837    | 2.64198666    | 2.33068002    | 18.7891091     | 16.7693978     | 18.0047837     | 4.46E-40  | 1.61032  | up        | PREDICTED: histidine kinase 4 [Sesamum indicum]                                                              |
| c38222.graph_c0 | 11.6019744    | 12.0298498    | 11.5424489    | 10.2154117     | 12.8529476     | 10.4812702     | 3.692E-19 | -1.15926 | down      | PREDICTED: protein kinase APK1A, chloroplastic [Sesamum indicum]                                             |
| c38225.graph_c0 | 10.3170679    | 11.0158921    | 8.41767662    | 81.6966949     | 76.1501942     | 72.2385798     | 2.211E-71 | 1.86305  | up        | PREDICTED: LOW QUALITY PROTEIN: transcription factor BIM2 [Sesamum indicum]                                  |
| c38231.graph_c0 | 18.4526055    | 20.9119047    | 15.5823874    | 90.9569953     | 94.8834394     | 86.8833216     | 4.283E-34 | 1.22292  | up        | PREDICTED: protein BRASSINAZOLE-RESISTANT 1 [Sesamum indicum]                                                |
| c38235.graph_c0 | 1.32644661    | 1.3769517     | 1.13635761    | 0.53558542     | 0.51582231     | 0.40789777     | 2.399E-10 | -2.4853  | down      | PREDICTED: uncharacterized protein LOC105167746 [Sesamum indicum]                                            |
| c38238.graph_c0 | 3.18338658    | 2.37298084    | 3.04632389    | 14.1773639     | 13.8231189     | 14.5611884     | 2.857E-14 | 1.21616  | up        | PREDICTED: probable glucuronosyltransferase Os03g0107900 [Sesamum indicum]                                   |
| c38241.graph_c0 | 0             | 0             | 0             | 2.05867811     | 1.74261873     | 1.36488993     | 2.79E-14  | Inf      | up        | PREDICTED: lipid phosphate phosphatase epsilon 2, chloroplastic isoform X1 [Sesamum indicum]                 |
| c38243.graph_c0 | 5.53297976    | 6.31585637    | 4.98954249    | 0.987697       | 1.210297       | 0.3454083      | 7.299E-29 | -3.82028 | down      | -                                                                                                            |
| c38246.graph_c0 | 1.68565245    | 1.30854968    | 1.19358191    | 26.0276022     | 27.5639688     | 24.3393899     | 2.663E-86 | 3.13081  | up        | PREDICTED: uncharacterized GPI-anchored protein At4g28100 [Nicotiana sylvestris]                             |

| #ID             | 0 h-1<br>FPKM | 0 h-2<br>FPKM | 0 h-3<br>FPKM | 28 h-1<br>FPKM | 28 h-2<br>FPKM | 28 h-3<br>FPKM | FDR       | log2FC   | regulated | nr_annotation                                                                                                                     |
|-----------------|---------------|---------------|---------------|----------------|----------------|----------------|-----------|----------|-----------|-----------------------------------------------------------------------------------------------------------------------------------|
| c38247.graph_c0 | 42.1607284    | 40.9595316    | 41.9716771    | 42.2723931     | 42.6752848     | 40.4740306     | 6.784E-28 | -1.08701 | down      | hypothetical protein EUGRS0Z_000592, partial [Eucalyptus grandis]                                                                 |
| c38248.graph_c0 | 8.74166794    | 8.40860806    | 9.30265059    | 8.58700891     | 6.81211629     | 6.88542171     | 4.271E-12 | -1.33921 | down      | hypothetical protein MIMGU_mgv1a02/006mg [Erythranthe diffusa]                                                                    |
| c38250.graph_c0 | 5.1895992     | 4.26520076    | 4.00130426    | 20.7248879     | 20.9710516     | 19.9566763     | 7.384E-11 | 1.10807  | up        | PREDICTED: exosome complex exonuclease RRP46 homolog [Sesamum indicum]                                                            |
| c38251.graph_c0 | 0.08556296    | 0.12847296    | 0.0549759     | 0.77733336     | 1.12297463     | 0.86264484     | 1.248E-05 | 2.27512  | up        | PREDICTED: transcription initiation factor IIB-2 [Sesamum indicum]                                                                |
| c38255.graph_c0 | 0.5989865     | 0.666207      | 0.14254099    | 15.930217      | 17.7027598     | 15.4855638     | 5.1E-108  | 4.04729  | up        | PREDICTED: probable protein S-acyltransferase 22 isoform X1 [Sesamum indicum]                                                     |
| c38256.graph_c0 | 4.09997867    | 4.97050195    | 5.09301375    | 33.010015      | 33.3325152     | 29.4214624     | 1.081E-35 | 1.66391  | up        | PREDICTED: cyclin-dependent kinase inhibitor 4-like [Musa acuminata subsp. malaccensis]                                           |
| c38257.graph_c2 | 31.1715947    | 31.2581652    | 32.2396298    | 141.023099     | 171.266117     | 159.010728     | 7.258E-21 | 1.22459  | up        | PREDICTED: chaperonin CPN60-2, mitochondrial [Sesamum indicum]                                                                    |
| c38259.graph_c0 | 6.63049026    | 6.39016673    | 7.68821323    | 41.7572136     | 51.5049652     | 41.5905754     | 3.523E-18 | 1.60963  | up        | PREDICTED: lysine histidine transporter 1-like [Sesamum indicum]                                                                  |
| c38268.graph_c0 | 0             | 0             | 0.10204909    | 2.30868189     | 2.29297561     | 2.77870171     | 1.619E-12 | 5.04712  | up        | hypothetical protein MIMGU_mgv1a00309/mg [Erythranthe diffusa]                                                                    |
| c38269.graph_c0 | 0.23295128    | 0.26233261    | 0.22451371    | 6.85695959     | 6.40138638     | 6.2859913      | 3.619E-32 | 3.67311  | up        | PREDICTED: uncharacterized protein LOC105168472 [Sesamum indicum]                                                                 |
| c38278.graph_c0 | 44.7620074    | 45.1987262    | 44.0490864    | 36.8957642     | 36.482044      | 39.1360552     | 8.222E-53 | -1.34222 | down      | PREDICTED: probable BOI-related E3 ubiquitin-protein ligase 2 [Sesamum indicum]                                                   |
| c38278.graph_c1 | 3.11786497    | 3.64115155    | 3.56140438    | 0.37767438     | 0.45467274     | 0.71908483     | 4.666E-16 | -3.82298 | down      | zinc ion binding protein, partial [Genlisea aurea]                                                                                |
| c38283.graph_c0 | 3.79713416    | 3.74585038    | 2.82867694    | 2.67974289     | 2.18482348     | 2.39878584     | 2.102E-15 | -1.60066 | down      | hypothetical protein SORBIDRAFT_03g008610 [Sorghum bicolor]                                                                       |
| c38284.graph_c0 | 3.53468035    | 2.68046955    | 2.89049358    | 15.9977721     | 14.4444883     | 16.6113599     | 4.933E-11 | 1.28145  | up        | PREDICTED: E3 ubiquitin ligase BIG BROTHER-like [Sesamum indicum]                                                                 |
| c38288.graph_c0 | 4.53247844    | 4.92357902    | 4.20507037    | 3.14645816     | 3.18774016     | 3.07374865     | 2.243E-27 | -1.62761 | down      | PREDICTED: G-type lectin S-receptor-like serine/threonine-protein kinase At4g27290 [Sesamum indicum]                              |
| c38291.graph_c0 | 0.26880006    | 0.18834845    | 0.06908374    | 1.26985515     | 1.09364198     | 1.37096098     | 0.0001489 | 1.7514   | up        | PREDICTED: two-component response regulator ARR9 [Sesamum indicum]                                                                |
| c38296.graph_c2 | 5.19854445    | 6.95127799    | 6.68033544    | 34.3709981     | 37.8057229     | 35.2018657     | 6.983E-35 | 1.4185   | up        | PREDICTED: LOW QUALITY PROTEIN: succinate dehydrogenase [ubiquinone] flavoprotein subunit 1, mitochondrial-like [Sesamum indicum] |
| c38298.graph_c0 | 1309.473      | 1284.57546    | 1277.70993    | 326.293903     | 321.72818      | 337.283245     | 5.69E-191 | -3.06442 | down      | hypothetical protein ZEAMMB73_433257, partial [Zea mays]                                                                          |
| c38303.graph_c0 | 2.5330782     | 2.06387242    | 2.34670416    | 1.88384121     | 1.66227444     | 1.81668978     | 1.03E-05  | -1.46255 | down      | PREDICTED: uncharacterized protein LOC104427989 [Eucalyptus grandis]                                                              |
| c38304.graph_c1 | 4.56562355    | 4.32783648    | 4.26691419    | 21.7698549     | 23.6055235     | 23.9178427     | 1.561E-23 | 1.3069   | up        | PREDICTED: delta(8)-fatty-acid desaturase [Sesamum indicum]                                                                       |
| c38304.graph_c2 | 0.7076121     | 0.81456877    | 1.18210244    | 15.2229366     | 15.6023013     | 15.1495503     | 1.323E-49 | 2.99019  | up        | PREDICTED: peroxidase 31 [Sesamum indicum]                                                                                        |
| c38305.graph_c0 | 0.18935694    | 0.25272874    | 0.16222078    | 2.79834522     | 2.73374528     | 2.32086008     | 2.602E-07 | 2.61127  | up        | PREDICTED: probable xyloglucan endotransglucosylase/hydrolase protein 26 [Sesamum indicum]                                        |
| c38308.graph_c0 | 55.8993162    | 52.9116976    | 55.2271269    | 254.813071     | 262.994601     | 264.76156      | 1.817E-48 | 1.16372  | up        | PREDICTED: 60S ribosomal protein L7a [Sesamum indicum]                                                                            |

| #ID             | 0 h-1<br>FPKM | 0 h-2<br>FPKM | 0 h-3<br>FPKM | 28 h-1<br>FPKM | 28 h-2<br>FPKM | 28 h-3<br>FPKM | FDR       | log2FC   | regulated | nr_annotation                                                                      |
|-----------------|---------------|---------------|---------------|----------------|----------------|----------------|-----------|----------|-----------|------------------------------------------------------------------------------------|
| c38310.graph_c0 | 31.655055     | 33.9297018    | 29.7362978    | 27.418552      | 24.7029122     | 25.4901153     | 2.111E-51 | -1.38606 | down      | PREDICTED: histone acetyltransferase HAC1-like isoform X1 [Sesamum indicum]        |
| c38315.graph_c0 | 10.4488424    | 10.2221926    | 8.99654625    | 63.5460814     | 58.7406075     | 58.7834776     | 3.85E-64  | 1.52082  | up        | PREDICTED: transcription factor PIF3 isoform X2 [Sesamum indicum]                  |
| c38316.graph_c1 | 13.0848142    | 12.2247222    | 17.3749878    | 14.2649513     | 15.169676      | 14.7441061     | 0.0038987 | -1.04517 | down      | -                                                                                  |
| c38317.graph_c0 | 0.46087873    | 0.92268047    | 0.64160137    | 3.04258974     | 3.32685202     | 3.37104404     | 0.0005884 | 1.17404  | up        | PREDICTED: uncharacterized protein LOC105171729 [Sesamum indicum]                  |
| c38319.graph_c0 | 37.2585785    | 36.9423718    | 38.3483815    | 36.9613469     | 39.0216438     | 39.9517361     | 4.855E-31 | -1.04801 | down      | PREDICTED: NAC domain-containing protein 78-like [Sesamum indicum]                 |
| c38321.graph_c0 | 2.12384068    | 2.25481389    | 1.53001691    | 19.4118786     | 20.3567837     | 22.5003406     | 2.779E-44 | 2.31186  | up        | hypothetical protein MIMGU_mgv1a0112/0mg [Erythranthe outtata]                     |
| c38322.graph_c0 | 107.160284    | 109.211482    | 110.300283    | 35.7725095     | 37.9759146     | 34.7600613     | 4.26E-227 | -2.68125 | down      | PREDICTED: protein phosphatase 2C 37-like [Sesamum indicum]                        |
| c38324.graph_c0 | 37.469595     | 33.3396579    | 38.4989501    | 10.3828322     | 10.4461211     | 9.63422262     | 2.696E-73 | -2.9349  | down      | Mitogen-activated protein kinase 10 [Morus notabilis]                              |
| c38327.graph_c0 | 27.6189555    | 24.8904747    | 30.0200045    | 140.100477     | 161.330537     | 153.712802     | 2.756E-33 | 1.3713   | up        | PREDICTED: ent-kaurenoic acid oxidase 1-like [Sesamum indicum]                     |
| c38330.graph_c0 | 25.0624638    | 21.9308472    | 21.9685073    | 22.6182792     | 22.7094703     | 22.9350675     | 1.194E-17 | -1.10379 | down      | PREDICTED: U-box domain-containing protein 4 [Sesamum indicum]                     |
| c38331.graph_c0 | 0.09796823    | 0.09806633    | 0.04196435    | 22.7374104     | 21.2797928     | 27.2880371     | 2.474E-64 | 7.14697  | up        | PREDICTED: raucatriicine-O-beta-D-glucosidase-like [Sesamum indicum]               |
| c38333.graph_c0 | 5.46421833    | 5.69895836    | 4.87737413    | 26.9196541     | 29.4161797     | 28.5638452     | 1.33E-28  | 1.31507  | up        | PREDICTED: uncharacterized protein At2g39795, mitochondrial-like [Sesamum indicum] |
| c38335.graph_c0 | 3.33747891    | 3.7613438     | 3.86891075    | 3.91837455     | 3.67576606     | 4.02784518     | 5.118E-09 | -1.00822 | down      | PREDICTED: uncharacterized protein LOC105173958 [Sesamum indicum]                  |
| c38338.graph_c0 | 0.17699739    | 0.35434925    | 0.34117298    | 3.68769959     | 4.04590824     | 3.32404199     | 1.041E-13 | 2.56662  | up        | PREDICTED: uncharacterized protein LOC105156552 [Sesamum indicum]                  |
| c38345.graph_c0 | 0.09343087    | 0.07014332    | 0             | 1.00159905     | 1.65542041     | 1.75926567     | 9.749E-08 | 3.68712  | up        | PREDICTED: uncharacterized protein LOC105160841 isoform X1 [Sesamum indicum]       |
| c38347.graph_c0 | 1.40535855    | 1.44814126    | 1.75282545    | 29.1401264     | 28.128146      | 25.7636995     | 5.611E-77 | 3.07802  | up        | cyclin dependent kinase A [Camellia sinensis]                                      |
| c38350.graph_c0 | 0             | 0             | 0             | 1.33844241     | 0.99432558     | 1.39630337     | 6.712E-17 | Inf      | up        | PREDICTED: uncharacterized protein LOC105176095 isoform X2 [Sesamum indicum]       |
| c38351.graph_c0 | 2.71687605    | 2.126864      | 2.95417124    | 19.0878952     | 16.5259962     | 19.1286137     | 2.709E-26 | 1.71954  | up        | PREDICTED: uncharacterized protein LOC105170284 [Sesamum indicum]                  |
| c38352.graph_c0 | 12.5143996    | 13.8736829    | 13.4469872    | 12.680779      | 13.6077325     | 13.0324199     | 4.168E-30 | -1.11003 | down      | PREDICTED: U-box domain-containing protein 33-like [Sesamum indicum]               |
| c38353.graph_c0 | 3.34141503    | 3.89783166    | 2.87383702    | 16.5024707     | 16.5404126     | 17.0547026     | 9.376E-20 | 1.22047  | up        | PREDICTED: uncharacterized protein LOC105156425 isoform X2 [Sesamum indicum]       |
| c38354.graph_c0 | 1.36312996    | 1.15457263    | 1.61693166    | 16.4611108     | 20.6428328     | 19.4641542     | 1.759E-19 | 2.68073  | up        | PREDICTED: auxin-responsive protein IAA26 [Sesamum indicum]                        |
| c38355.graph_c0 | 110.727094    | 100.198137    | 112.907262    | 14.7835403     | 13.1976078     | 14.2854255     | 5.03E-149 | -4.02856 | down      | hypothetical protein MIMGU_mgv1a006265mg [Erythranthe outtata]                     |
| c38359.graph_c0 | 1.62838226    | 1.30401027    | 1.30202219    | 6.10159402     | 7.12392326     | 5.98749741     | 8.572E-06 | 1.09311  | up        | PREDICTED: probable beta-1,3-galactosyltransferase 2-like isoformX1 [Glycine max]  |

| #ID             | 0 h-1<br>FPKM | 0 h-2<br>FPKM | 0 h-3<br>FPKM | 28 h-1<br>FPKM | 28 h-2<br>FPKM | 28 h-3<br>FPKM | FDR       | log2FC   | regulated | nr_annotation                                                                   |
|-----------------|---------------|---------------|---------------|----------------|----------------|----------------|-----------|----------|-----------|---------------------------------------------------------------------------------|
| c38361.graph_c0 | 1.40040248    | 1.15259504    | 1.95953464    | 7.05677754     | 6.9434195      | 7.23475306     | 3.619E-08 | 1.1386   | up        | PREDICTED: uncharacterized protein LOC105173063 [Sesamum indicum]               |
| c38362.graph_c0 | 1.17260636    | 1.45833341    | 0.95890175    | 8.44495879     | 7.08869059     | 7.860396       | 1.421E-11 | 1.61691  | up        | PREDICTED: phospholipase D delta [Sesamum indicum]                              |
| c38362.graph_c1 | 0.74452019    | 0             | 0             | 9.7400337      | 13.435793      | 13.0255414     | 2.418E-11 | 4.545    | up        | -                                                                               |
| c38367.graph_c0 | 0.14939764    | 0.04984908    | 0.38396377    | 1.80968908     | 2.32025098     | 2.21503726     | 4.28E-07  | 2.33554  | up        | -                                                                               |
| c38369.graph_c0 | 5.18625011    | 3.20323101    | 4.46665759    | 1.84456902     | 2.35338559     | 2.19228844     | 5.15E-08  | -2.09819 | down      | -                                                                               |
| c38371.graph_c0 | 7.67124357    | 3.02830852    | 2.77685964    | 0              | 0              | 0              | 1.266E-07 | -Inf     | down      | PREDICTED: plastocyanin, chloroplastic-like [Solanum tuberosum]                 |
| c38372.graph_c0 | 45.264079     | 48.5567486    | 50.3537522    | 20.0319344     | 21.1545336     | 22.7691196     | 2.228E-63 | -2.264   | down      | PREDICTED: myosin-14 [Sesamum indicum]                                          |
| c38374.graph_c0 | 0             | 0             | 0             | 0.78896459     | 0.94133425     | 1.44852449     | 2.05E-07  | Inf      | up        | Fructose-bisphosphate aldolase A [Rozella allomycis CSF55]                      |
| c38375.graph_c0 | 22.603314     | 26.5740998    | 21.2485283    | 4.52044492     | 5.17658469     | 5.48798572     | 1.403E-56 | -3.30225 | down      | PREDICTED: WRKY transcription factor 22 [Sesamum indicum]                       |
| c38376.graph_c0 | 0.13795438    | 0.36824673    | 0.05909228    | 1.4037023      | 1.90111735     | 1.19995293     | 0.0015207 | 1.91133  | up        | -                                                                               |
| c38376.graph_c1 | 0.247906      | 0.16543616    | 0.26547419    | 2.40235539     | 2.30467052     | 2.54839309     | 1.441E-07 | 2.32573  | up        | PREDICTED: receptor-like serine/threonine-protein kinase ALE2 [Sesamum indicum] |
| c38383.graph_c0 | 0.02887026    | 0.08669752    | 0.1112983     | 0.92324063     | 1.23145414     | 1.1985222      | 4.849E-08 | 2.78307  | up        | PREDICTED: transcription factor LHW-like [Sesamum indicum]                      |
| c38383.graph_c1 | 0.21250368    | 0.04254329    | 0.05461513    | 1.01934659     | 0.94826453     | 1.05862717     | 6.735E-06 | 2.21434  | up        | PREDICTED: transcription factor LHW-like [Sesamum indicum]                      |
| c38384.graph_c0 | 0.10878371    | 0.21778527    | 0.06989568    | 2.13471102     | 1.67759006     | 1.45158896     | 6.757E-07 | 2.6457   | up        | -                                                                               |
| c38387.graph_c0 | 4.13896733    | 4.52608861    | 4.78239368    | 22.4728562     | 22.3450772     | 21.658662      | 1.453E-20 | 1.21314  | up        | hypothetical protein MIMGU_mgv1a005/05mg [Erythranthe outtata]                  |
| c38388.graph_c0 | 10.8320539    | 14.4572008    | 10.0530575    | 11.8090115     | 10.0042555     | 9.51709331     | 2.673E-06 | -1.26307 | down      | -                                                                               |
| c38389.graph_c0 | 10.4665468    | 9.61721066    | 9.5253283     | 7.07522776     | 8.22541606     | 7.82984036     | 7.238E-30 | -1.44579 | down      | PREDICTED: glucan endo-1,3-beta-glucosidase 4-like [Sesamum indicum]            |
| c38390.graph_c0 | 23.5147851    | 21.6576917    | 21.5338128    | 11.2541233     | 11.931215      | 10.9264771     | 2.736E-98 | -2.05749 | down      | PREDICTED: F-box protein At3g07870-like [Sesamum indicum]                       |
| c38393.graph_c1 | 46.040942     | 48.2769969    | 46.2825319    | 12.8390777     | 12.8567284     | 12.3550087     | 0         | -2.97627 | down      | PREDICTED: light-inducible protein CPRF2 [Sesamum indicum]                      |
| c38399.graph_c0 | 0.86999904    | 0.54429388    | 0.65215687    | 3.16155144     | 3.33034861     | 3.54722522     | 0.0003201 | 1.19309  | up        | PREDICTED: probable flavin-containing monooxygenase 1 [Sesamum indicum]         |
| c38402.graph_c0 | 0.22160395    | 0.35492136    | 0.39867778    | 1.38512004     | 1.89049255     | 1.57708834     | 0.0044305 | 1.21793  | up        | hypothetical protein MIMGU_mgv1a0045/4mg [Erythranthe outtata]                  |
| c38405.graph_c0 | 1.13613035    | 1.63766593    | 1.10957908    | 0.03302932     | 0.23857903     | 0.24256489     | 6.486E-17 | -4.00421 | down      | PREDICTED: BEACH domain-containing protein lvsA-like [Sesamum indicum]          |
| c38406.graph_c0 | 0             | 0             | 0             | 0.90970657     | 0.46935985     | 0.75746238     | 5.839E-08 | Inf      | up        | PREDICTED: potassium channel SKOR-like [Sesamum indicum]                        |
| c38408.graph_c0 | 2.98673649    | 2.92328887    | 3.41162191    | 19.1990147     | 19.1206673     | 18.6577824     | 4.374E-14 | 1.51917  | up        | PREDICTED: N-alpha-acetyltransferase MAK3-like isoform X2 [Sesamum indicum]     |
| c38414.graph_c0 | 34.0496939    | 37.4197837    | 32.4830883    | 161.850286     | 162.022184     | 152.80269      | 9.854E-44 | 1.10715  | up        | PREDICTED: phosphoenolpyruvate carboxylase 1-like [Sesamum indicum]             |
| c38415.graph_c0 | 7.09079872    | 6.97999379    | 6.72044676    | 6.52326637     | 5.96719316     | 6.60825952     | 1.798E-21 | -1.21203 | down      | PREDICTED: autophagy-related protein 13 [Sesamum indicum]                       |

| #ID             | 0 h-1<br>FPKM | 0 h-2<br>FPKM | 0 h-3<br>FPKM | 28 h-1<br>FPKM | 28 h-2<br>FPKM | 28 h-3<br>FPKM | FDR       | log2FC   | regulated | nr_annotation                                                                                             |
|-----------------|---------------|---------------|---------------|----------------|----------------|----------------|-----------|----------|-----------|-----------------------------------------------------------------------------------------------------------|
| c38416.graph_c0 | 3.67987069    | 2.9835133     | 3.14538729    | 22.5578481     | 19.023621      | 21.0633977     | 1.749E-29 | 1.58628  | up        | PREDICTED: probable sucrose-phosphate synthase 2 [Sesamum indicum]                                        |
| c38418.graph_c0 | 58.8608432    | 62.1081538    | 53.2936188    | 36.7560722     | 48.5012151     | 51.8703303     | 3.88E-28  | -1.43411 | down      | hypothetical protein MIMGU_mgv1a00664/mg [Erythranthe diffusa]                                            |
| c38422.graph_c0 | 0.58956661    | 0.13114599    | 0.0841796     | 2.33290968     | 1.97743553     | 2.25328254     | 0.0001369 | 1.95776  | up        | hypothetical protein CICLE_v10010274mg [Citrus clementina]                                                |
| c38423.graph_c0 | 15.3066269    | 14.6835394    | 15.0254054    | 11.8586939     | 10.6026573     | 9.92875628     | 1.983E-31 | -1.56577 | down      | PREDICTED: coiled-coil domain-containing protein 97 [Sesamum indicum]                                     |
| c38428.graph_c0 | 1.66741002    | 1.65238888    | 1.60701592    | 9.37982729     | 8.81924846     | 9.3547208      | 6.054E-22 | 1.39363  | up        | PREDICTED: structural maintenance of chromosomes protein 5 [Sesamum indicum]                              |
| c38433.graph_c0 | 7.73187122    | 8.5326067     | 8.10334576    | 37.079352      | 38.3035072     | 38.901148      | 5.129E-29 | 1.13883  | up        | PREDICTED: uncharacterized protein LOC105163069 [Sesamum indicum]                                         |
| c38435.graph_c0 | 0.09024382    | 0.31616966    | 0.23193377    | 1.04941905     | 1.5397314      | 1.632355       | 0.0003647 | 1.62986  | up        | PREDICTED: BEL1-like homeodomain protein 4 [Sesamum indicum]                                              |
| c38436.graph_c0 | 3.04965361    | 2.93252205    | 2.25261079    | 13.2813715     | 12.433057      | 12.1476735     | 2.091E-14 | 1.11396  | up        | PREDICTED: putative tRNA pseudouridine synthase Pus10 [Sesamum indicum]                                   |
| c38437.graph_c0 | 1.39223764    | 1.27066425    | 1.15764032    | 0.89282673     | 1.04798047     | 0.72853932     | 6.006E-06 | -1.60712 | down      | PREDICTED: probably inactive leucine-rich repeat receptor-like protein kinase At2g25790 [Sesamum indicum] |
| c38437.graph_c1 | 1.71318311    | 2.22936819    | 2.75188516    | 2.17898032     | 2.02362679     | 1.5748267      | 0.000669  | -1.30986 | down      | PREDICTED: probable leucine-rich repeat receptor-like protein kinase At1g35710 [Sesamum indicum]          |
| c38439.graph_c0 | 2.77462121    | 2.01992696    | 2.64711223    | 2.32212093     | 2.56564666     | 1.96962771     | 1.257E-05 | -1.20982 | down      | PREDICTED: telomere repeat-binding protein 5-like isoform X2 [Nicotiana glauca]                           |
| c38441.graph_c0 | 56.0023774    | 55.3104843    | 52.6599815    | 23.7810637     | 25.1883908     | 24.7229122     | 1.89E-147 | -2.24364 | down      | PREDICTED: UBA and UBX domain-containing protein At4g15410-like [Sesamum indicum]                         |
| c38442.graph_c0 | 1438.04255    | 1446.16627    | 1541.26606    | 1177.83144     | 1132.30583     | 1260.07167     | 1.097E-43 | -1.40084 | down      | --                                                                                                        |
| c38448.graph_c0 | 817.785776    | 823.214906    | 818.062214    | 127.601353     | 128.040782     | 136.605464     | 4.01E-231 | -3.73849 | down      | PREDICTED: probable alpha,alpha-trehalose-phosphate synthase [UDP-forming] 11 [Sesamum indicum]           |
| c38450.graph_c1 | 225.332758    | 232.468593    | 226.179785    | 118.303721     | 114.56524      | 112.120494     | 1.39E-138 | -2.07806 | down      | PREDICTED: uncharacterized protein LOC104242030 [Nicotiana glauca]                                        |
| c38451.graph_c0 | 5.35131419    | 5.02775422    | 4.48389791    | 62.7406195     | 61.7521237     | 65.7277663     | 8.5E-192  | 2.58976  | up        | PREDICTED: delta(24)-sterol reductase [Sesamum indicum]                                                   |
| c38454.graph_c0 | 357.327064    | 350.468193    | 373.693893    | 350.399323     | 372.333069     | 363.661699     | 4.223E-38 | -1.08471 | down      | PREDICTED: endo-1,3;1,4-beta-D-glucanase-like isoform X1 [Nicotiana glauca]                               |
| c38459.graph_c0 | 1.47218704    | 0.85963571    | 0.86708354    | 0              | 0              | 0              | 1.148E-18 | -Inf     | down      | PREDICTED: metalloendoproteinase 1-like [Glycine max]                                                     |
| c38460.graph_c0 | 29.9799067    | 24.2994157    | 27.9872092    | 10.9701938     | 10.801971      | 10.4493937     | 5.177E-42 | -2.44265 | down      | PREDICTED: uncharacterized protein LOC105164190 [Sesamum indicum]                                         |
| c38462.graph_c0 | 35.8331971    | 38.8422571    | 36.5925441    | 20.7950793     | 20.6714894     | 21.1703671     | 3.17E-110 | -1.91943 | down      | PREDICTED: NPL4-like protein 2 [Sesamum indicum]                                                          |
| c38464.graph_c0 | 0             | 0.05540722    | 0.07112925    | 0.70401391     | 1.10786205     | 0.91915137     | 2.792E-09 | 3.32235  | up        | PREDICTED: cation/H(+) antiporter 14 isoform X1 [Nicotiana glauca]                                        |
| c38465.graph_c0 | 0.97865154    | 0.76193562    | 2.23574395    | 11.3014219     | 10.2041243     | 11.7369228     | 4.611E-09 | 1.96036  | up        | PREDICTED: F-box protein PP2-A15-like [Nicotiana glauca]                                                  |

| #ID             | 0 h-1<br>FPKM | 0 h-2<br>FPKM | 0 h-3<br>FPKM | 28 h-1<br>FPKM | 28 h-2<br>FPKM | 28 h-3<br>FPKM | FDR       | log2FC   | regulated | nr_annotation                                                                      |
|-----------------|---------------|---------------|---------------|----------------|----------------|----------------|-----------|----------|-----------|------------------------------------------------------------------------------------|
| c38467.graph_c0 | 1.28403239    | 1.15349065    | 1.48079836    | 9.88263824     | 9.938557       | 9.76289601     | 6.964E-19 | 1.82358  | up        | PREDICTED: uncharacterized protein LOC105163544 [Sesamum indicum]                  |
| c38474.graph_c0 | 50.1529913    | 51.4234289    | 49.1756088    | 54.8345646     | 51.4246088     | 51.173521      | 7.238E-34 | -1.02778 | down      | PREDICTED: transcription elongation factor S-II [Sesamum indicum]                  |
| c38476.graph_c1 | 17.9179692    | 15.5727339    | 16.413305     | 246.066997     | 249.267085     | 250.725551     | 1.9E-220  | 2.81236  | up        | hypothetical protein CISIN_1g024108mg [Citrus sinensis]                            |
| c38477.graph_c0 | 1.12669131    | 1.30589629    | 1.14303391    | 6.2061935      | 5.01990138     | 5.80273286     | 0.000356  | 1.16177  | up        | -                                                                                  |
| c38478.graph_c0 | 0.47106089    | 0.38312023    | 0.49183216    | 19.4291763     | 21.4840415     | 21.3540773     | 4.5E-115  | 4.44008  | up        | hypothetical protein MIMGU_mgv1a002464mg [Erythranthe diffusa]                     |
| c38479.graph_c1 | 545.50221     | 518.186758    | 554.788777    | 148.693906     | 147.222355     | 154.437527     | 7.48E-206 | -2.93622 | down      | PREDICTED: putative G5BP-like protein isoform X1 [Sesamum indicum]                 |
| c38482.graph_c0 | 3.85380163    | 5.65437928    | 3.52765697    | 47.0017534     | 44.9325019     | 47.6203954     | 8.74E-68  | 2.33217  | up        | PREDICTED: 40S ribosomal protein S7 [Sesamum indicum]                              |
| c38484.graph_c0 | 567.450345    | 568.018561    | 576.68671     | 267.451295     | 274.925686     | 278.582276     | 1.32E-141 | -2.15109 | down      | -                                                                                  |
| c38489.graph_c0 | 4.28451968    | 4.72644365    | 3.90460746    | 3.78124226     | 3.91618182     | 3.69477689     | 1.392E-16 | -1.27036 | down      | PREDICTED: uncharacterized protein LOC105171501 [Sesamum indicum]                  |
| c38492.graph_c1 | 7.48986328    | 6.56548758    | 6.19900495    | 6.18170329     | 6.19240876     | 7.20244263     | 1.721E-11 | -1.13675 | down      | PREDICTED: uncharacterized protein LOC105168847 isoform X2 [Sesamum indicum]       |
| c38493.graph_c0 | 4.26806306    | 4.21401146    | 3.40683503    | 0.70933189     | 0.61178287     | 0.76022678     | 1.24E-76  | -3.60089 | down      | PREDICTED: structural maintenance of chromosomes protein 2-1 [Sesamum indicum]     |
| c38494.graph_c0 | 0.12021529    | 0.06016783    | 0             | 1.94402206     | 2.6230434      | 2.13883971     | 1.211E-14 | 4.14918  | up        | Putative gag-pol polyprotein, identical [Solanum demissum]                         |
| c38495.graph_c0 | 0.26403554    | 0.13214997    | 0.8482403     | 4.02988967     | 3.55197891     | 4.38447609     | 4.555E-06 | 2.15604  | up        | PREDICTED: cytochrome c oxidase subunit 5b-1, mitochondrial-like [Sesamum indicum] |
| c38500.graph_c0 | 19.7577445    | 20.0498889    | 19.1496955    | 18.3604836     | 19.0363083     | 18.0355035     | 8.443E-41 | -1.17924 | down      | PREDICTED: uncharacterized protein LOC105159907 [Sesamum indicum]                  |
| c38502.graph_c0 | 2.29561308    | 2.81494195    | 2.87620486    | 2.29410274     | 1.46878232     | 1.8038975      | 3.37E-07  | -1.61346 | down      | PREDICTED: protein ROOT HAIR DEFECTIVE 3 homolog 1-like [Sesamum indicum]          |
| c38504.graph_c0 | 3.85063158    | 3.78244091    | 4.48576412    | 93.8190523     | 94.0616573     | 89.6171962     | 1.19E-238 | 3.42422  | up        | PREDICTED: probable pectinesterase/pectinesterase inhibitor 51 [Sesamum indicum]   |
| c38505.graph_c0 | 2.48048904    | 2.01271286    | 2.41479289    | 16.1159853     | 15.8830306     | 15.1788118     | 1.418E-41 | 1.68077  | up        | PREDICTED: nuclear pore complex protein NUP96 [Sesamum indicum]                    |
| c38507.graph_c0 | 0             | 0.31884833    | 0.51165356    | 1.85204248     | 2.50833107     | 2.97527647     | 0.0003778 | 2.03245  | up        | hypothetical protein EUGRSUZ_J00099 [Eucalyptus grandis]                           |
| c38509.graph_c0 | 0.02719466    | 0.08166567    | 0.10483864    | 6.9177222      | 7.33465263     | 6.35443743     | 2.637E-49 | 5.48797  | up        | PREDICTED: sulfate transporter 3.1-like [Sesamum indicum]                          |
| c38512.graph_c0 | 0.09191375    | 0.09200579    | 0             | 1.16904176     | 1.26664213     | 1.09020404     | 1.562E-08 | 3.18991  | up        | PREDICTED: microtubule-associated protein RP/EB family member 1B [Sesamum indicum] |
| c38514.graph_c0 | 3.35755108    | 3.20086967    | 2.72229835    | 3.12293742     | 2.97709939     | 3.23573749     | 1.556E-10 | -1.07908 | down      | PREDICTED: serine/threonine-protein kinase D6PK [Sesamum indicum]                  |
| c38514.graph_c1 | 5.15052449    | 6.70238655    | 7.05986975    | 2.62036006     | 2.47860324     | 3.36001665     | 6.148E-10 | -2.25325 | down      | -                                                                                  |
| c38515.graph_c0 | 9.20949729    | 7.23236535    | 7.7807385     | 45.8923826     | 47.1127541     | 48.5825731     | 8.516E-36 | 1.45856  | up        | hypothetical protein MIMGU_mgv1a012548mg [Erythranthe diffusa]                     |
| c38516.graph_c0 | 0.02504371    | 0.02506879    | 0             | 5.93372965     | 5.75202619     | 6.59445544     | 3.805E-53 | 7.44119  | up        | PREDICTED: uncharacterized protein LOC105155823 [Sesamum indicum]                  |



| #ID             | 0 h-1<br>FPKM | 0 h-2<br>FPKM | 0 h-3<br>FPKM | 28 h-1<br>FPKM | 28 h-2<br>FPKM | 28 h-3<br>FPKM | FDR       | log2FC   | regulated | nr_annotation                                                                                              |
|-----------------|---------------|---------------|---------------|----------------|----------------|----------------|-----------|----------|-----------|------------------------------------------------------------------------------------------------------------|
| c38518.graph_c0 | 0.96603278    | 1.48273351    | 1.32414972    | 1.2637927      | 1.22561123     | 0.84027331     | 0.0012953 | -1.27517 | down      | PREDICTED: LOW QUALITY PROTEIN: ethylene-responsive transcription factor ERF025 [Sesamum indicum]          |
| c38524.graph_c0 | 222.006809    | 224.180776    | 212.295353    | 44.2115516     | 39.4071053     | 39.6993088     | 0         | -3.50683 | down      | Histone H3.3 [Arabidopsis thaliana]                                                                        |
| c38525.graph_c1 | 29.1873033    | 30.4911892    | 27.5164994    | 31.5274863     | 31.4570367     | 29.1245301     | 5.59E-36  | -1.01092 | down      | PREDICTED: pectinesterase 3-like [Sesamum indicum]                                                         |
| c38527.graph_c0 | 0.15792058    | 0.07903936    | 0.1014671     | 12.7018515     | 13.5066722     | 12.5967439     | 2.425E-95 | 5.75511  | up        | PREDICTED: auxin transporter-like protein 2 [Sesamum indicum]                                              |
| c38531.graph_c0 | 35.6877425    | 37.389506     | 38.7857693    | 26.868144      | 28.6912215     | 27.2581223     | 2.727E-52 | -1.5254  | down      | PREDICTED: deSI-like protein At4g17486 [Sesamum indicum]                                                   |
| c38532.graph_c0 | 15.411083     | 15.9814255    | 14.5893124    | 8.44483401     | 10.8843897     | 9.66569267     | 2.879E-72 | -1.75521 | down      | PREDICTED: autophagy-related protein 13 isoform X2 [Sesamum indicum]                                       |
| c38536.graph_c0 | 0.22331707    | 0.29805426    | 0.0318857     | 1.00990128     | 1.12352474     | 1.29496902     | 0.0015515 | 1.55701  | up        | PREDICTED: uncharacterized protein LOC105175444 [Sesamum indicum]                                          |
| c38540.graph_c0 | 3.11451672    | 1.8339032     | 2.04037666    | 0              | 0              | 0              | 2.268E-22 | -Inf     | down      | hypothetical protein PAXRUDRAFT_143168 [Paxillus rubicundulus Ve08.2h10]                                   |
| c38540.graph_c1 | 1.45384243    | 0.81398037    | 0.82329444    | 0.28654761     | 0.42042914     | 0.74530287     | 0.0002646 | -2.17035 | down      | PREDICTED: heat shock protein 83-like [Nelumbo nucifera]                                                   |
| c38542.graph_c0 | 1.36876631    | 0.77070202    | 0.76952702    | 14.0827998     | 14.8487239     | 14.0789284     | 5.307E-35 | 2.80184  | up        | PREDICTED: homoserine dehydrogenase [Sesamum indicum]                                                      |
| c38545.graph_c1 | 32.4407005    | 33.8787945    | 33.3593212    | 20.1758242     | 17.956974      | 17.3814949     | 3.082E-98 | -1.93555 | down      | PREDICTED: protein SSUH2 homolog [Sesamum indicum]                                                         |
| c38547.graph_c0 | 35.5152993    | 35.436551     | 38.8881669    | 220.525146     | 220.396272     | 241.576946     | 5.264E-53 | 1.54408  | up        | -                                                                                                          |
| c38549.graph_c0 | 28.3750862    | 31.9202942    | 32.5933667    | 30.7583997     | 30.9479048     | 29.2232358     | 2.48E-17  | -1.12305 | down      | PREDICTED: 3-ketoacyl-CoA synthase 10 [Sesamum indicum]                                                    |
| c38552.graph_c0 | 4.53231428    | 6.00035358    | 6.26258418    | 1.84183994     | 1.85489441     | 2.16768224     | 9.47E-15  | -2.61113 | down      | PREDICTED: uncharacterized protein LOC105175383 [Sesamum indicum]                                          |
| c38553.graph_c0 | 1.59876792    | 2.29242023    | 1.88790061    | 8.57349349     | 9.61252602     | 9.04598146     | 3.301E-07 | 1.14476  | up        | PREDICTED: uncharacterized protein LOC105174166 [Sesamum indicum]                                          |
| c38556.graph_c0 | 2.95573304    | 3.12571573    | 2.84867548    | 47.7630181     | 56.1867586     | 52.7007398     | 3.967E-91 | 3.04275  | up        | PREDICTED: thaumatin-like protein [Sesamum indicum]                                                        |
| c38559.graph_c0 | 13.8974043    | 14.3373014    | 12.7964019    | 10.1624115     | 10.2608316     | 9.46780869     | 8.131E-72 | -1.54675 | down      | PREDICTED: filaggrin-like [Sesamum indicum]                                                                |
| c38566.graph_c0 | 0             | 0             | 0             | 1.24631602     | 1.08779629     | 1.54242527     | 1.285E-15 | Inf      | up        | PREDICTED: nomeobox protein ATH1 isoform X2 [Sesamum indicum]                                              |
| c38569.graph_c1 | 6.64626937    | 6.61772394    | 7.23023854    | 7.1818103      | 6.64603696     | 6.52766352     | 1.492E-12 | -1.10171 | down      | PREDICTED: transcription factor HBP-1b(c38)-like isoform X1 [Sesamum indicum]                              |
| c38572.graph_c0 | 22.5052068    | 22.4802155    | 21.9036062    | 18.5996558     | 17.6661476     | 17.7395461     | 1.815E-38 | -1.39892 | down      | PREDICTED: cyclin-dependent kinase F-4-like [Sesamum indicum]                                              |
| c38576.graph_c0 | 108.547577    | 111.653137    | 111.229456    | 54.6677295     | 58.1573249     | 58.2313518     | 4.49E-135 | -2.04493 | down      | PREDICTED: HIPL1 protein-like [Solanum tuberosum]                                                          |
| c38580.graph_c0 | 3.26708642    | 3.66769111    | 2.98199523    | 24.4329349     | 24.945966      | 26.1662797     | 3.014E-46 | 1.84062  | up        | PREDICTED: NADP-dependent glyceraldehyde-3-phosphate dehydrogenase [Sesamum indicum]                       |
| c38581.graph_c1 | 13.6162419    | 11.0460136    | 9.53650303    | 85.829655      | 81.1803735     | 67.8931103     | 1.615E-19 | 1.69273  | up        | -                                                                                                          |
| c38583.graph_c0 | 11.0792944    | 11.435305     | 10.626908     | 10.8071245     | 9.65345846     | 10.3275778     | 2.515E-27 | -1.19602 | down      | PREDICTED: internal alternative NAD(P)H-ubiquinone oxidoreductase A1, mitochondrial-like [Sesamum indicum] |
| c38584.graph_c0 | 24.3240699    | 23.9261997    | 23.8495714    | 195.026568     | 209.214396     | 205.96071      | 1.02E-112 | 1.99091  | up        | hypothetical protein M569_17345, partial [Genlisea aurea]                                                  |

| #ID             | 0 h-1<br>FPKM | 0 h-2<br>FPKM | 0 h-3<br>FPKM | 28 h-1<br>FPKM | 28 h-2<br>FPKM | 28 h-3<br>FPKM | FDR       | log2FC   | regulated | nr_annotation                                                                                    |
|-----------------|---------------|---------------|---------------|----------------|----------------|----------------|-----------|----------|-----------|--------------------------------------------------------------------------------------------------|
| c38588.graph_c0 | 1.06743738    | 0.94639126    | 1.29331648    | 5.12032843     | 5.82400155     | 6.05921632     | 8.903E-08 | 1.26895  | up        | hypothetical protein MIMGU_mgv1a005578mg [Erythranthe<br>cattata]                                |
| c38591.graph_c0 | 66.1167518    | 62.4407873    | 63.2072657    | 13.8570427     | 14.8246812     | 15.9631535     | 0         | -3.19242 | down      | PREDICTED: E3 ubiquitin-protein ligase RNF170-like [Sesamum<br>indicum]                          |
| c38596.graph_c0 | 0             | 0             | 0             | 3.06435481     | 4.48295709     | 3.5133446      | 9.205E-20 | Inf      | up        | PREDICTED: uncharacterized protein LOC105168232 isoform X2<br>[Sesamum indicum]                  |
| c38600.graph_c0 | 0.23745343    | 0.29051147    | 0.54246589    | 3.24066488     | 3.25497698     | 2.9729447      | 1.716E-10 | 2.04302  | up        | PREDICTED: phosphatidylinositol 4-kinase gamma 8 [Sesamum<br>indicum]                            |
| c38601.graph_c0 | 1.32814492    | 1.35660699    | 1.35840884    | 0.53189343     | 0.48024989     | 0.69121814     | 7.14E-13  | -2.33624 | down      | -                                                                                                |
| c38602.graph_c0 | 0.81465389    | 1.25456868    | 1.12739038    | 10.293183      | 9.7461313      | 8.91945484     | 1.674E-12 | 2.08563  | up        | hypothetical protein MIMGU_mgv1a015466mg [Erythranthe<br>cattata]                                |
| c38604.graph_c1 | 3.29310271    | 4.14891756    | 3.35622928    | 19.807515      | 16.9901125     | 16.5331673     | 1.091E-10 | 1.21373  | up        | PREDICTED: pentatricopeptide repeat-containing protein<br>At4g21190 isoform X1 [Sesamum indicum] |
| c38608.graph_c0 | 16.7925579    | 16.8093731    | 15.6409274    | 15.6012751     | 15.0591544     | 15.2021562     | 5.291E-42 | -1.19221 | down      | PREDICTED: DNA ligase 1-like [Sesamum indicum]                                                   |
| c38610.graph_c0 | 1.12794784    | 0.74281402    | 1.37317039    | 7.48594049     | 8.5121837      | 8.06247138     | 3.511E-17 | 1.79615  | up        | hypothetical protein MIMGU_mgv1a005256mg [Erythranthe<br>cattata]                                |
| c38614.graph_c0 | 13.8997873    | 13.7090926    | 12.7834287    | 11.0431845     | 11.5806219     | 12.7691609     | 1.711E-16 | -1.27955 | down      | PREDICTED: sphingoid long-chain bases kinase 1-like [Sesamum<br>indicum]                         |
| c38619.graph_c0 | 3.02348843    | 2.80773171    | 2.01286748    | 1.85327443     | 2.7251424      | 2.76526958     | 1.524E-05 | -1.1801  | down      | PREDICTED: uncharacterized protein LOC105177754 isoform X2<br>[Sesamum indicum]                  |
| c38629.graph_c0 | 21.7974091    | 18.6656745    | 18.7101612    | 82.8622957     | 88.3945559     | 84.2283403     | 3.638E-21 | 1.02116  | up        | hypothetical protein M569_15947, partial [Genlisea aurea]                                        |
| c38630.graph_c0 | 43.1488629    | 43.0498036    | 45.5491782    | 14.5645871     | 13.7100504     | 14.5817947     | 2.04E-154 | -2.71128 | down      | PREDICTED: WPP domain-interacting protein 1-like [Sesamum<br>indicum]                            |
| c38632.graph_c1 | 1.04988829    | 1.00715045    | 0.89943202    | 7.94846626     | 7.66473674     | 6.95286717     | 2.361E-11 | 1.84306  | up        | PREDICTED: protein PHK1-LIKE 1-LIKE isoform X1 [Sesamum<br>indicum]                              |
| c38638.graph_c0 | 0.16199196    | 0             | 0.20816608    | 5.57278149     | 5.59865121     | 5.1237681      | 1.76E-19  | 4.36034  | up        | PREDICTED: ABC transporter I family member 17-like [Sesamum<br>indicum]                          |
| c38642.graph_c0 | 0             | 0.09304754    | 0.29862539    | 2.56723298     | 2.68396605     | 1.81920415     | 2.228E-09 | 3.05359  | up        | hypothetical protein MIMGU_mgv1a025521mg [Erythranthe<br>cattata]                                |
| c38644.graph_c0 | 241.157655    | 235.6063      | 248.322257    | 55.5190611     | 60.9744928     | 57.7408608     | 0         | -3.14826 | down      | PREDICTED: pheophytinase, chloroplastic [Sesamum indicum]                                        |
| c38645.graph_c0 | 43.2521494    | 42.3623681    | 35.2170969    | 14.6788925     | 14.4362983     | 15.9581902     | 2.67E-63  | -2.51013 | down      | PREDICTED: cell number regulator 6-like [Sesamum indicum]                                        |
| c38646.graph_c0 | 2.07624441    | 2.80573667    | 2.80145909    | 0.07545012     | 0.34062194     | 0              | 1.192E-23 | -5.30931 | down      | PREDICTED: uncharacterized protein LOC105168686 [Sesamum<br>indicum]                             |
| c38650.graph_c0 | 31.4532265    | 33.7951118    | 29.1363155    | 20.9522807     | 22.9272426     | 20.9886467     | 1.484E-64 | -1.63068 | down      | PREDICTED: probable histone-lysine N-methyltransferase ATXR3<br>isoform X1 [Sesamum indicum]     |
| c38660.graph_c0 | 1.14980496    | 1.541111      | 1.4024155     | 7.46438889     | 7.55811992     | 8.00944991     | 1.717E-16 | 1.40041  | up        | PREDICTED: anaphase-promoting complex subunit 5 [Sesamum<br>indicum]                             |
| c38664.graph_c0 | 0.71242512    | 1.1410216     | 1.92253841    | 11.5466382     | 12.9968512     | 13.6470578     | 4.573E-16 | 2.23634  | up        | PREDICTED: uncharacterized protein LOC105179255 [Sesamum<br>indicum]                             |
| c38669.graph_c0 | 217.033901    | 218.697641    | 226.070098    | 61.8038581     | 67.181799      | 58.4867633     | 0         | -2.91134 | down      | PREDICTED: BTB/POZ and TAZ domain-containing protein 1<br>[Sesamum indicum]                      |
| c38681.graph_c1 | 0.39206183    | 0.32704535    | 0.25190749    | 4.63040952     | 4.35234671     | 3.352098       | 2.161E-13 | 2.5805   | up        | PREDICTED: 3-ketoacyl-CoA synthase 12 [Sesamum indicum]                                          |

| #ID             | 0 h-1<br>FPKM | 0 h-2<br>FPKM | 0 h-3<br>FPKM | 28 h-1<br>FPKM | 28 h-2<br>FPKM | 28 h-3<br>FPKM | FDR       | log2FC   | regulated | nr_annotation                                                                                |
|-----------------|---------------|---------------|---------------|----------------|----------------|----------------|-----------|----------|-----------|----------------------------------------------------------------------------------------------|
| c38697.graph_c0 | 1.61620645    | 1.01114052    | 2.07688928    | 13.6553008     | 16.5718499     | 16.4143883     | 2.171E-08 | 2.2142   | up        | hypothetical protein AMTR_s00007p00249170 [Amborella trichopoda]                             |
| c38697.graph_c1 | 1.9088292     | 2.66707543    | 2.50402362    | 21.6191645     | 22.4167747     | 20.0230767     | 2.424E-38 | 2.08414  | up        | PREDICTED: uncharacterized membrane protein At1g16860-like [Sesamum indicum]                 |
| c38703.graph_c0 | 0.08523162    | 0.08531697    | 0.10952601    | 3.69610248     | 4.36264109     | 3.97638831     | 3.623E-25 | 4.33106  | up        | PREDICTED: BTB/POZ domain-containing protein NPY2 [Sesamum indicum]                          |
| c38706.graph_c0 | 1.33702047    | 1.59739658    | 1.27473734    | 0.81500671     | 0.45284594     | 0.38367624     | 3.631E-11 | -2.44072 | down      | -                                                                                            |
| c38710.graph_c0 | 6.98902706    | 6.70229925    | 7.438608      | 108.164131     | 103.876451     | 96.1395211     | 2.57E-178 | 2.77446  | up        | PREDICTED: protein NK11/PIK FAMILY 8.3-like [Sesamum indicum]                                |
| c38711.graph_c0 | 22.1611926    | 21.4027367    | 21.4628989    | 149.35236      | 155.577829     | 147.153962     | 9.776E-80 | 1.70706  | up        | unnamed protein product [Coffea canephora]                                                   |
| c38714.graph_c1 | 32.2512875    | 31.2928692    | 29.1644239    | 23.6136799     | 20.9626038     | 22.7903464     | 1.551E-66 | -1.54976 | down      | PREDICTED: putative E3 ubiquitin-protein ligase XBAT34 isoform X2 [Sesamum indicum]          |
| c38715.graph_c0 | 0.45691732    | 0.3201624     | 0.41100979    | 2.25817715     | 3.08836752     | 1.68006699     | 0.0019796 | 1.47181  | up        | PREDICTED: F-box/keich-repeat protein At5g24760 [Sesamum indicum]                            |
| c38757.graph_c0 | 26.1340665    | 24.5895918    | 27.69962      | 20.0036173     | 21.9775055     | 21.1128403     | 6.172E-32 | -1.40536 | down      | PREDICTED: uncharacterized protein At5g02240 [Sesamum indicum]                               |
| c38759.graph_c0 | 1.188999      | 1.56603895    | 1.36707807    | 12.5530265     | 11.4163379     | 11.5421194     | 5.567E-14 | 2.01526  | up        | -                                                                                            |
| c38760.graph_c0 | 12.4644723    | 9.45761962    | 8.60718292    | 62.7367314     | 57.8097313     | 52.9288966     | 5.739E-21 | 1.41959  | up        | PREDICTED: NADPH-dependent 1-acyldihydroxyacetone phosphate reductase-like [Sesamum indicum] |
| c38761.graph_c0 | 0.16190234    | 0.08103223    | 0.15603819    | 2.47106346     | 2.39050566     | 2.16039386     | 5.412E-10 | 3.04523  | up        | PREDICTED: putative glucose-6-phosphate 1-epimerase [Sesamum indicum]                        |
| c38762.graph_c0 | 6.79808054    | 6.42102233    | 7.12303908    | 3.29387051     | 3.0426883      | 3.99030682     | 1.329E-33 | -2.06821 | down      | PREDICTED: exocyst complex component EXO70A1-like [Sesamum indicum]                          |
| c38763.graph_c0 | 2.79422498    | 2.89237603    | 3.2234601     | 17.6312674     | 17.5029848     | 18.5674773     | 1.701E-25 | 1.49935  | up        | PREDICTED: 54S ribosomal protein L10, mitochondrial [Sesamum indicum]                        |
| c38770.graph_c0 | 3.89767001    | 1.91177074    | 2.85493636    | 0              | 0              | 0              | 4.563E-20 | -Inf     | down      | cytochrome P450 [Aureobasidium pullulans var. nambiae CBS 147971]                            |
| c38775.graph_c0 | 16.4387003    | 15.5180791    | 15.3500625    | 105.296312     | 99.200951      | 99.1344108     | 7.572E-75 | 1.59231  | up        | PREDICTED: uncharacterized protein LOC105168156 [Sesamum indicum]                            |
| c38777.graph_c0 | 62.5234583    | 59.4662169    | 67.6015581    | 368.132596     | 370.815718     | 367.327719     | 4.56E-72  | 1.45294  | up        | hypothetical protein [Solanum tuberosum]                                                     |
| c38791.graph_c0 | 0.26355243    | 0.14070205    | 0.22578354    | 35.4875314     | 37.6570312     | 35.7827197     | 0         | 6.34368  | up        | PREDICTED: probable methyltransferase PM126 [Sesamum indicum]                                |
| c38793.graph_c0 | 44.4013752    | 45.1631675    | 41.1079392    | 36.3956419     | 44.9569701     | 39.490397      | 2.624E-48 | -1.20264 | down      | PREDICTED: uncharacterized protein LOC105159283 [Sesamum indicum]                            |
| c38793.graph_c1 | 0.92475413    | 0.92568013    | 0.7130074     | 6.67625264     | 6.63487885     | 4.24121507     | 1.315E-05 | 1.68631  | up        | PREDICTED: uncharacterized protein LOC105166230 isoform X2 [Sesamum indicum]                 |
| c38793.graph_c2 | 1.48580459    | 2.08220936    | 1.81385184    | 12.7425157     | 12.6753272     | 12.2923012     | 4.404E-19 | 1.7166   | up        | PREDICTED: uncharacterized protein LOC105166230 isoform X2 [Sesamum indicum]                 |
| c38806.graph_c0 | 1.45459062    | 1.30392284    | 1.6739163     | 12.9387198     | 12.2380796     | 11.0600332     | 3.802E-36 | 1.93789  | up        | PREDICTED: uncharacterized protein LOC105171651 isoform X2 [Sesamum indicum]                 |
| c38814.graph_c0 | 0.99765733    | 0.99865633    | 0.82416161    | 6.21507082     | 5.82206222     | 4.52204028     | 1.116E-07 | 1.46431  | up        | PREDICTED: probable amino acid permease 7 [Sesamum indicum]                                  |

| #ID             | 0 h-1<br>FPKM | 0 h-2<br>FPKM | 0 h-3<br>FPKM | 28 h-1<br>FPKM | 28 h-2<br>FPKM | 28 h-3<br>FPKM | FDR       | log2FC   | regulated | nr_annotation                                                                                                 |
|-----------------|---------------|---------------|---------------|----------------|----------------|----------------|-----------|----------|-----------|---------------------------------------------------------------------------------------------------------------|
| c38822.graph_c0 | 36.9342021    | 35.2806547    | 31.043676     | 167.145221     | 162.962797     | 158.554547     | 7.757E-39 | 1.15401  | up        | PREDICTED: protein ETHYLENE INSENSITIVE 3 [Sesamum indicum]                                                   |
| c38823.graph_c0 | 0.57097993    | 0.42866376    | 0.67258749    | 2.0749246      | 2.52917419     | 2.53968229     | 0.0098697 | 1.00148  | up        | PREDICTED: protein cornichon homolog 4 [Sesamum indicum]                                                      |
| c38825.graph_c0 | 0.52418989    | 0.38161075    | 0.48989437    | 2.45904103     | 2.34536989     | 2.93918267     | 0.0006291 | 1.38259  | up        | PREDICTED: tRNA (guanine(9)-N1)-methyltransferase [Sesamum indicum]                                           |
| c38829.graph_c0 | 1.75342253    | 1.48515088    | 1.64658193    | 14.9004126     | 12.5464375     | 12.5985649     | 6.166E-26 | 1.94476  | up        | PREDICTED: heparan-alpha-glucosaminide N-acetyltransferase isoform X1 [Sesamum indicum]                       |
| c38844.graph_c0 | 0.89775221    | 1.02702991    | 1.81287406    | 4.28773313     | 5.72297018     | 6.54115107     | 0.0072037 | 1.04784  | up        | PREDICTED: 14 kDa zinc-binding protein [Sesamum indicum]                                                      |
| c38846.graph_c0 | 3.9000548     | 2.92797009    | 4.87251025    | 1.41726868     | 0.42655358     | 0.96373305     | 3.32E-09  | -3.15263 | down      | -                                                                                                             |
| c38847.graph_c0 | 85.8989643    | 87.0406362    | 89.5746276    | 6.62632623     | 6.63036022     | 7.12194372     | 0         | -4.77799 | down      | hypothetical protein EUGRSUZ_J00099 [Eucalyptus grandis]                                                      |
| c38848.graph_c0 | 5.98185102    | 4.25802023    | 4.66908935    | 1.61021291     | 1.71556811     | 2.54900593     | 3.969E-16 | -2.42948 | down      | predicted protein [Hordeum vulgare subsp. vulgare]                                                            |
| c38855.graph_c0 | 0             | 0.07096172    | 0.36438958    | 2.93680956     | 3.16338825     | 3.44747078     | 2.415E-10 | 3.33306  | up        | PREDICTED: UDP-N-acetylglucosamine--peptide N-acetylglucosaminyltransferase 110 kDa subunit [Sesamum indicum] |
| c38857.graph_c0 | 2.01215942    | 1.63651662    | 1.29285226    | 0.30467206     | 0.08252709     | 0.19888793     | 7.994E-24 | -4.15998 | down      | -                                                                                                             |
| c38868.graph_c0 | 0.94802055    | 0.72568282    | 1.14658253    | 0.28371242     | 0.23786816     | 0.39686917     | 1.948E-09 | -2.71037 | down      | -                                                                                                             |
| c38873.graph_c1 | 0.5585085     | 0.35577039    | 0.78295149    | 7.52798498     | 6.36391834     | 7.28701653     | 5.171E-15 | 2.54485  | up        | PREDICTED: raucatriicine-O-beta-D-glucosidase-like [Sesamum indicum]                                          |
| c38877.graph_c0 | 0.75729994    | 0.89183325    | 0.28622365    | 4.20895061     | 3.71258883     | 3.27595536     | 0.0001141 | 1.45162  | up        | PREDICTED: probable dimethyladenosine transferase [Sesamum indicum]                                           |
| c38893.graph_c0 | 0.07256716    | 0.29055931    | 0.2331292     | 1.34490561     | 1.73814956     | 1.14046854     | 0.0001362 | 1.72471  | up        | -                                                                                                             |
| c38898.graph_c0 | 6.23957423    | 5.81594781    | 6.07038334    | 32.2399225     | 34.0330664     | 30.6371669     | 1.095E-38 | 1.32779  | up        | PREDICTED: CDPK-related kinase 1 [Sesamum indicum]                                                            |
| c38900.graph_c0 | 2.09331965    | 2.77334443    | 2.53176342    | 1.83464468     | 1.41409572     | 1.20494677     | 5.658E-08 | -1.82544 | down      | hypothetical protein AM11K_SU0554P00011530 [Amborella trichonoides]                                           |
| c38902.graph_c0 | 1.79614463    | 0.8989716     | 1.61568188    | 8.09365093     | 8.36861876     | 6.17826577     | 0.002472  | 1.30083  | up        | PREDICTED: copper transporter 6-like [Nicotiana glauca]                                                       |
| c38904.graph_c0 | 28.1343657    | 29.5194352    | 27.1953166    | 21.8754273     | 23.2007038     | 23.3627226     | 2.455E-57 | -1.39992 | down      | PREDICTED: 20S-pre-rRNA D-site endonuclease nob1 [Sesamum indicum]                                            |
| c38906.graph_c0 | 0.77160191    | 0.80595605    | 0.47421431    | 0.73147281     | 0.22015046     | 0.27854206     | 8.464E-05 | -1.82377 | down      | gag-pol polyprotein [Oryza sativa Japonica Group]                                                             |
| c38908.graph_c0 | 23.2929401    | 22.8641486    | 20.1483687    | 23.588296      | 24.2619588     | 22.538743      | 4.893E-18 | -1.00279 | down      | PREDICTED: uncharacterized protein LOC105158092 [Sesamum indicum]                                             |
| c38923.graph_c0 | 57.3795797    | 56.9894027    | 51.0003629    | 50.1331558     | 46.8061816     | 50.4888641     | 9.455E-55 | -1.25444 | down      | PREDICTED: large subunit GTPase 1 homolog isoform X1 [Cicer arietinum]                                        |
| c38925.graph_c0 | 27.4062434    | 29.4951775    | 28.8259195    | 29.3138784     | 30.9586654     | 30.7031365     | 1.384E-29 | -1.00523 | down      | PREDICTED: probable nucleoredoxin 1 [Sesamum indicum]                                                         |
| c38926.graph_c0 | 3.65483242    | 3.94642906    | 3.00060834    | 15.3106823     | 15.6895327     | 14.7813381     | 3.42E-19  | 1.02237  | up        | PREDICTED: pleiotropic drug resistance protein 2-like [Sesamum indicum]                                       |
| c38930.graph_c0 | 1.30892097    | 1.94936905    | 2.01021337    | 12.5759364     | 12.9261402     | 12.5906602     | 2.828E-23 | 1.75915  | up        | PREDICTED: uncharacterized protein LOC105159306 [Sesamum indicum]                                             |
| c38931.graph_c0 | 1.76168665    | 2.29248592    | 1.47149411    | 66.5799525     | 69.6530027     | 67.3362415     | 1.16E-207 | 4.11554  | up        | PREDICTED: uncharacterized protein LOC105171035 [Sesamum indicum]                                             |

| #ID             | 0 h-1<br>FPKM | 0 h-2<br>FPKM | 0 h-3<br>FPKM | 28 h-1<br>FPKM | 28 h-2<br>FPKM | 28 h-3<br>FPKM | FDR       | log2FC   | regulated | nr_annotation                                                                                                      |
|-----------------|---------------|---------------|---------------|----------------|----------------|----------------|-----------|----------|-----------|--------------------------------------------------------------------------------------------------------------------|
| c38934.graph_c0 | 27.9185733    | 28.9288329    | 26.3556508    | 20.3267191     | 20.4782198     | 22.2316451     | 1.689E-48 | -1.48972 | down      | PREDICTED: formin-like protein 14 isoform X2 [Sesamum indicum]                                                     |
| c38934.graph_c1 | 23.6241239    | 23.3396655    | 18.4916409    | 17.4495168     | 18.3811572     | 17.6614188     | 3.444E-19 | -1.37874 | down      | PREDICTED: formin-like protein 5 [Sesamum indicum]                                                                 |
| c38938.graph_c0 | 2.47164023    | 3.45345248    | 2.24977685    | 15.9802426     | 12.9418667     | 15.788172      | 8.825E-10 | 1.36356  | up        | PREDICTED: EPIDERMAL PATTERNING FACTOR-like protein 2 [Sesamum indicum]                                            |
| c38944.graph_c0 | 4.21522924    | 4.81165368    | 3.80121857    | 1.45118099     | 1.40733818     | 1.44729669     | 9.467E-18 | -2.6637  | down      | hypothetical protein MIMGU_mgv1a00579/mg [Erythranthe diffusa]                                                     |
| c38944.graph_c1 | 14.2897216    | 15.1454442    | 14.6238145    | 2.16172677     | 2.50344258     | 2.3774997      | 1.297E-92 | -3.73596 | down      | PREDICTED: probable protein S-acyltransferase 22 isoform X2 [Sesamum indicum]                                      |
| c38952.graph_c0 | 7.6726155     | 7.21198758    | 7.75542863    | 8.56863419     | 7.36826027     | 8.07402078     | 2.274E-09 | -1.00586 | down      | hypothetical protein MIMGU_mgv1a006823/mg [Erythranthe diffusa]                                                    |
| c38956.graph_c0 | 42.9873913    | 36.8091687    | 36.3833011    | 176.63581      | 183.16342      | 168.270792     | 9.78E-42  | 1.09528  | up        | PREDICTED: REF/SRPP-like protein At1g07560 [Sesamum indicum]                                                       |
| c38964.graph_c0 | 1.83947561    | 1.39121772    | 1.83851033    | 10.7102169     | 11.2932189     | 11.1394648     | 2.618E-27 | 1.61756  | up        | PREDICTED: DNA gyrase subunit B, chloroplastic/mitochondrial-like isoform X1 [Sesamum indicum]                     |
| c38967.graph_c1 | 0.90296948    | 1.02439015    | 0.69621092    | 11.3535231     | 11.1004928     | 11.5313889     | 8.614E-36 | 2.60849  | up        | PREDICTED: phosphomevalonate kinase [Sesamum indicum]                                                              |
| c38969.graph_c0 | 14.3940413    | 13.4971508    | 12.5842245    | 12.7326367     | 13.14333       | 12.2429514     | 4.53E-32  | -1.17578 | down      | PREDICTED: chaperone protein ClpB4, mitochondrial [Sesamum indicum]                                                |
| c38969.graph_c1 | 19.2277736    | 19.1335871    | 18.2522148    | 15.704305      | 15.2454575     | 17.1383868     | 1.793E-36 | -1.32481 | down      | PREDICTED: chaperone protein ClpB4, mitochondrial [Sesamum indicum]                                                |
| c38972.graph_c0 | 103.586863    | 96.6875213    | 110.202666    | 57.4898919     | 51.4636913     | 59.2915779     | 6.593E-44 | -1.97501 | down      | PREDICTED: zinc finger A20 and AN1 domain-containing stress-associated protein 8-like isoform X1 [Sesamum indicum] |
| c38986.graph_c0 | 17.807236     | 15.1012368    | 14.6039841    | 16.3740599     | 15.1781371     | 16.3750593     | 2.047E-19 | -1.07556 | down      | PREDICTED: ABC transporter 1 family member 1 [Sesamum indicum]                                                     |
| c38987.graph_c0 | 1.40863495    | 1.16121393    | 1.17127462    | 24.0891239     | 29.3627974     | 25.6517695     | 1.278E-40 | 3.31324  | up        | PREDICTED: NADPH:quinone oxidoreductase [Sesamum indicum]                                                          |
| c38988.graph_c1 | 0.75812376    | 0.67456258    | 0.61339718    | 25.6112953     | 26.9203492     | 24.4788474     | 5.38E-137 | 4.14567  | up        | PREDICTED: probable protein S-acyltransferase 7 [Sesamum indicum]                                                  |
| c38995.graph_c0 | 2.20585906    | 2.2080679     | 2.6226823     | 31.2550186     | 28.9779447     | 29.7218768     | 2.55E-117 | 2.58333  | up        | PREDICTED: SNF2 domain-containing protein CLASSY 3-like [Sesamum indicum]                                          |
| c38996.graph_c0 | 11.6308942    | 13.628801     | 10.5133091    | 11.7813247     | 13.3418633     | 12.8903708     | 9.025E-10 | -1.00114 | down      | PREDICTED: uncharacterized protein LOC105173283 [Sesamum indicum]                                                  |
| c39015.graph_c0 | 0.6633793     | 0.88539143    | 0.87141241    | 0.01071423     | 0              | 0              | 1.189E-47 | -8.91713 | down      | PREDICTED: uncharacterized protein LOC103452707 [Matis domestica]                                                  |
| c39021.graph_c0 | 9.53150499    | 9.37424778    | 10.363998     | 52.7309202     | 62.0890434     | 52.5348758     | 3.072E-25 | 1.42312  | up        | PREDICTED: uncharacterized protein LOC105158512 [Sesamum indicum]                                                  |
| c39024.graph_c0 | 71.5366187    | 73.8872967    | 66.4862285    | 29.7133701     | 30.574401      | 31.564636      | 3.9E-168  | -2.29536 | down      | PREDICTED: uncharacterized protein LOC105169073 [Sesamum indicum]                                                  |
| c39028.graph_c0 | 8.6009005     | 10.4413243    | 10.5821786    | 2.52703433     | 3.12229219     | 2.49615293     | 5.534E-19 | -2.95618 | down      | -                                                                                                                  |
| c39028.graph_c1 | 9.99733907    | 6.60485093    | 8.22206497    | 2.03448236     | 0.78726292     | 0.94864056     | 3.397E-21 | -3.80872 | down      | -                                                                                                                  |
| c39029.graph_c0 | 19.4573194    | 18.1234299    | 18.2804503    | 7.775671       | 7.63790644     | 7.53019205     | 3.648E-67 | -2.37375 | down      | PREDICTED: CBL-interacting serine/threonine-protein kinase 1-like [Sesamum indicum]                                |

| #ID             | 0 h-1<br>FPKM | 0 h-2<br>FPKM | 0 h-3<br>FPKM | 28 h-1<br>FPKM | 28 h-2<br>FPKM | 28 h-3<br>FPKM | FDR       | log2FC   | regulated | nr_annotation                                                                      |
|-----------------|---------------|---------------|---------------|----------------|----------------|----------------|-----------|----------|-----------|------------------------------------------------------------------------------------|
| c39034.graph_c0 | 14.0081415    | 15.6479272    | 13.6703371    | 14.6075741     | 14.9478391     | 15.0259971     | 1.366E-19 | -1.04865 | down      | PREDICTED: histone-lysine N-methyltransferase ATXR6 [Sesamum indicum]              |
| c39040.graph_c0 | 0.5066508     | 0.84526356    | 0.65106634    | 10.862811      | 9.14314392     | 9.26459626     | 6.91E-14  | 2.77708  | up        | PREDICTED: uncharacterized protein LOC105178874 isoform X1 [Sesamum indicum]       |
| c39047.graph_c0 | 2.45067276    | 2.1720393     | 2.29630007    | 20.7984599     | 20.3537529     | 18.7881128     | 2.833E-51 | 2.02447  | up        | PREDICTED: transcription factor LHW-like [Nicotiana sylvestris]                    |
| c39052.graph_c0 | 0.62843976    | 0.41937936    | 0.71783997    | 9.64242385     | 9.07278172     | 9.64882324     | 7.458E-17 | 2.91236  | up        | unnamed protein product [Vitis vinifera]                                           |
| c39052.graph_c1 | 1.18180146    | 1.26457002    | 0.68077937    | 12.4988614     | 13.344466      | 11.1415275     | 5.043E-27 | 2.47939  | up        | nypothetical protein MIMGU_mgv1a002912mg [Erythranthe                              |
| c39060.graph_c0 | 16.2703123    | 17.1321845    | 15.1972337    | 10.6506603     | 11.7133889     | 11.1957339     | 1.101E-47 | -1.6238  | down      | hypothetical protein MIMGU_mgv1a009954mg [Erythranthe                              |
| c39068.graph_c0 | 1.41249524    | 0.99805387    | 1.17448444    | 12.1379573     | 14.3535915     | 13.2429224     | 3.661E-50 | 2.38127  | up        | PREDICTED: protein NK11/PIR FAMILY 5.8 [Nicotiana sylvestris]                      |
| c39070.graph_c0 | 14.0818408    | 17.0703147    | 11.4550907    | 6.57267938     | 9.49522117     | 7.0488464      | 7.804E-11 | -1.97057 | down      | -                                                                                  |
| c39073.graph_c0 | 1.75695129    | 2.08439776    | 2.92671551    | 19.5797784     | 22.3759443     | 19.2958204     | 7.319E-24 | 2.08036  | up        | LEC14B protein [Morus notabilis]                                                   |
| c39074.graph_c0 | 0.34321666    | 0.34356034    | 0.441047      | 2.92210387     | 3.12101738     | 3.51846294     | 1.12E-06  | 1.99037  | up        | -                                                                                  |
| c39081.graph_c0 | 3.96931897    | 3.35608298    | 3.71412527    | 17.7854139     | 17.1207022     | 17.323884      | 6.348E-14 | 1.15209  | up        | PREDICTED: UDP-galactose/UDP-glucose transporter 2-like [Sesamum indicum]          |
| c39087.graph_c0 | 81.4900172    | 86.8394515    | 79.3069015    | 15.1833037     | 12.5579539     | 15.4158828     | 7.47E-187 | -3.60987 | down      | ubiquitin [Galdieria sulphuraria]                                                  |
| c39094.graph_c0 | 3.98382019    | 3.29427732    | 5.56452899    | 24.2963299     | 24.2106041     | 26.1944546     | 1.028E-07 | 1.44461  | up        | -                                                                                  |
| c39102.graph_c1 | 12419.2522    | 12680.8182    | 12985.2777    | 370.04556      | 377.492734     | 381.132713     | 0         | -6.16755 | down      | 15 kDa oleosin [Sesamum indicum]                                                   |
| c39103.graph_c0 | 1.88858879    | 1.73719777    | 2.23013477    | 17.0649488     | 16.2454428     | 16.104402      | 1.386E-22 | 1.98374  | up        | nypothetical protein MIMGU_mgv1a0112/8mg [Erythranthe                              |
| c39104.graph_c0 | 0             | 0.06766919    | 0.02895686    | 0.52407867     | 0.42883197     | 0.60137425     | 1.604E-07 | 2.91264  | up        | PREDICTED: probable RNA helicase SDE3 [Sesamum indicum]                            |
| c39110.graph_c0 | 1.54254487    | 1.22955274    | 2.16577115    | 14.8028402     | 14.3028542     | 13.7561645     | 2.155E-35 | 2.02133  | up        | PREDICTED: tubulin gamma-1 chain [Sesamum indicum]                                 |
| c39112.graph_c0 | 10.6251316    | 9.24459426    | 6.3371672     | 86.606886      | 83.4052071     | 77.9289954     | 1.251E-74 | 2.15717  | up        | PREDICTED: probable voltage-gated potassium channel subunit beta [Sesamum indicum] |
| c39115.graph_c0 | 3.65323793    | 2.58133842    | 3.3138038     | 0.31237086     | 0              | 0.31861508     | 1.281E-24 | -5.00464 | down      | PREDICTED: stem-specific protein TSJT1-like [Sesamum indicum]                      |
| c39130.graph_c0 | 1.13022838    | 0.95730473    | 1.00549953    | 6.98226951     | 5.67675388     | 6.47088778     | 4.791E-08 | 1.5396   | up        | PREDICTED: xylosyltransferase 1 [Sesamum indicum]                                  |
| c39132.graph_c0 | 84.8566816    | 87.7806117    | 84.7716573    | 52.0265803     | 50.6974001     | 55.909133      | 3.46E-99  | -1.78837 | down      | PREDICTED: histidine kinase 3 isoform X2 [Sesamum indicum]                         |
| c39133.graph_c0 | 0.95594446    | 0.8657682     | 0.93594398    | 0              | 0              | 0              | 8.146E-28 | -Inf     | down      | -                                                                                  |
| c39134.graph_c0 | 150.985195    | 143.330085    | 159.722013    | 80.636067      | 83.3585195     | 80.340766      | 1.514E-59 | -1.98555 | down      | PREDICTED: high mobility group B protein 1 [Sesamum indicum]                       |
| c39144.graph_c0 | 27.0993377    | 27.5085366    | 24.4721188    | 27.2293352     | 28.368941      | 27.1749841     | 3.043E-35 | -1.02346 | down      | PREDICTED: ankyrin repeat domain-containing protein 50 [Sesamum indicum]           |
| c39146.graph_c0 | 1.80691612    | 1.28255079    | 1.09765323    | 7.92729209     | 7.24383766     | 7.20898818     | 4.841E-09 | 1.33319  | up        | PREDICTED: phytoene synthase 2, chloroplastic [Sesamum indicum]                    |
| c39157.graph_c0 | 0.5576278     | 0.41863964    | 0.3582869     | 4.58473761     | 5.10015563     | 5.37396794     | 6.853E-14 | 2.41114  | up        | PREDICTED: probable beta-1,3-galactosyltransferase 11 [Sesamum indicum]            |

| #ID             | 0 h-1<br>FPKM | 0 h-2<br>FPKM | 0 h-3<br>FPKM | 28 h-1<br>FPKM | 28 h-2<br>FPKM | 28 h-3<br>FPKM | FDR       | log2FC   | regulated | nr_annotation                                                                                  |
|-----------------|---------------|---------------|---------------|----------------|----------------|----------------|-----------|----------|-----------|------------------------------------------------------------------------------------------------|
| c39167.graph_c0 | 14.0149597    | 14.9351726    | 13.2703628    | 12.7203057     | 12.4753506     | 12.6067203     | 1.153E-29 | -1.24909 | down      | PREDICTED: uncharacterized protein LOC105176476 isoform X2 [Sesamum indicum]                   |
| c39170.graph_c0 | 65.9160176    | 62.6829214    | 66.9937112    | 5.60734126     | 4.96459462     | 5.99707313     | 0         | -4.65149 | down      | PREDICTED: protein REVELLE 6 isoform X2 [Nicotiana glauca]                                     |
| c39171.graph_c0 | 0             | 0             | 0             | 3.3434172      | 4.21042078     | 6.461529       | 6.254E-08 | Inf      | up        | -                                                                                              |
| c39178.graph_c0 | 15.6781098    | 18.6506137    | 17.2271379    | 3.1376875      | 3.72768108     | 4.58163846     | 2.407E-28 | -3.26111 | down      | hypothetical protein SERLADRAFT_461711 [Serpula lacrymans var. lacrymans S7.9]                 |
| c39191.graph_c1 | 3.09783151    | 3.52480213    | 2.89255       | 25.3332679     | 22.7858155     | 23.2755331     | 2.696E-55 | 1.81817  | up        | PREDICTED: protein FAR1-RELATED SEQUENCE 5-like [Prunus mume]                                  |
| c39191.graph_c2 | 1.24203038    | 0.88805292    | 0.22800832    | 11.6061496     | 11.7600639     | 11.7855401     | 1.966E-09 | 2.82342  | up        | -                                                                                              |
| c39195.graph_c0 | 1.89823259    | 1.9544229     | 2.26506803    | 17.324142      | 17.6707411     | 17.2241636     | 3.738E-43 | 2.00054  | up        | PREDICTED: armadillo repeat-containing protein LFR [Sesamum indicum]                           |
| c39213.graph_c0 | 2.3393633     | 1.36599506    | 1.25257269    | 0              | 0              | 0              | 4.458E-15 | -Inf     | down      | PREDICTED: uncharacterized protein LOC104436401 [Eucalyptus grandis]                           |
| c39216.graph_c0 | 0.41945304    | 0.74285234    | 0.82925195    | 20.542608      | 21.3006133     | 19.4415548     | 4.484E-92 | 3.84582  | up        | PREDICTED: cell division protein FtsZ homolog 2-2, chloroplastic [Sesamum indicum]             |
| c39218.graph_c0 | 28.9893274    | 25.5058176    | 27.2603777    | 25.9091235     | 27.2924276     | 26.3679206     | 8.501E-33 | -1.12927 | down      | PREDICTED: F-box protein At4g00755-like [Sesamum indicum]                                      |
| c39224.graph_c0 | 0.91197553    | 1.46406684    | 1.37093073    | 0.06253005     | 0.03387526     | 0.08163842     | 1.888E-20 | -5.48644 | down      | hypothetical protein VITISV_033646 [Vitis vinifera]                                            |
| c39225.graph_c0 | 4.94504722    | 4.80179538    | 5.32719404    | 29.6561428     | 30.7407586     | 29.6782278     | 4.154E-40 | 1.4873   | up        | PREDICTED: serine hydroxymethyltransferase, mitochondrial [Sesamum indicum]                    |
| c39227.graph_c1 | 1.81839612    | 2.18426037    | 1.76551499    | 0              | 0              | 0.02396477     | 1.28E-44  | -8.98633 | down      | PREDICTED: phosphatase D delta-like isoform X2 [Sesamum indicum]                               |
| c39231.graph_c0 | 3.20044132    | 2.51165853    | 3.15854885    | 19.0737109     | 19.9436528     | 22.4880709     | 1.764E-26 | 1.70321  | up        | PREDICTED: glucose-1-phosphate adenylyltransferase large subunit 1 [Sesamum indicum]           |
| c39235.graph_c0 | 1.58915372    | 1.08840449    | 2.14960573    | 7.3554484      | 6.86082672     | 6.94444641     | 0.0012264 | 1.03597  | up        | -                                                                                              |
| c39242.graph_c0 | 5.34134277    | 3.80530283    | 4.88507313    | 25.0410172     | 25.5148465     | 25.2562012     | 3.792E-20 | 1.3435   | up        | PREDICTED: sn1-specific diacylglycerol lipase beta isoform X1 [Sesamum indicum]                |
| c39247.graph_c0 | 104.644516    | 94.5967513    | 100.746163    | 103.584367     | 101.570607     | 100.202986     | 2.667E-39 | -1.06482 | down      | PREDICTED: protein CWC15 homolog A [Sesamum indicum]                                           |
| c39252.graph_c0 | 1.05350156    | 0.35151883    | 0.67689561    | 8.47351277     | 9.12563818     | 9.10107418     | 7.045E-25 | 2.5947   | up        | hypothetical protein MIMGU_mgv1a009282mg [Erythranthe guttata]                                 |
| c39255.graph_c0 | 14.9621014    | 14.1074465    | 16.1257809    | 165.991981     | 164.127909     | 160.923336     | 3.19E-113 | 2.34974  | up        | hypothetical protein MIMGU_mgv1a016658mg [Erythranthe guttata]                                 |
| c39260.graph_c0 | 0.11986528    | 0.0399951     | 0             | 2.03273913     | 2.01891013     | 2.55913488     | 8.079E-13 | 4.30648  | up        | PREDICTED: probable galactinol--sucrose galactosyltransferase 2 [Sesamum indicum]              |
| c39266.graph_c0 | 1.75138826    | 1.06712992    | 1.85919399    | 1.43892918     | 1.29921814     | 1.12899468     | 0.0010107 | -1.3681  | down      | -                                                                                              |
| c39271.graph_c0 | 31.8571455    | 27.6564121    | 25.7481419    | 15.0515794     | 13.7478235     | 14.3337096     | 1.162E-48 | -2.07115 | down      | PREDICTED: glycerophosphodiester phosphodiesterase GDPD1, chloroplastic-like [Sesamum indicum] |
| c39272.graph_c0 | 5.02700417    | 4.80839182    | 4.47407846    | 20.4601469     | 21.5769627     | 20.9464341     | 7.144E-24 | 1.04881  | up        | PREDICTED: ATP-dependent zinc metalloprotease FtsH [Sesamum indicum]                           |

| #ID             | 0 h-1<br>FPKM | 0 h-2<br>FPKM | 0 h-3<br>FPKM | 28 h-1<br>FPKM | 28 h-2<br>FPKM | 28 h-3<br>FPKM | FDR       | log2FC   | regulated | nr_annotation                                                                               |
|-----------------|---------------|---------------|---------------|----------------|----------------|----------------|-----------|----------|-----------|---------------------------------------------------------------------------------------------|
| c39285.graph_c0 | 128.443647    | 127.704265    | 124.870853    | 30.0144734     | 34.6043943     | 39.372923      | 0         | -2.96272 | down      | hypothetical protein MIMGU_mgv116009377mg [Erythranthe guttata]                             |
| c39287.graph_c0 | 6.82663674    | 6.19645395    | 6.46785905    | 34.142262      | 34.4338991     | 38.9419715     | 5.312E-24 | 1.37422  | up        | -                                                                                           |
| c39293.graph_c0 | 11.0793087    | 10.564216     | 10.6520322    | 10.5797663     | 9.97709425     | 9.40038097     | 2.031E-19 | -1.19896 | down      | hypothetical protein MIMGU_mgv1a0098172mg, partial [Erythranthe guttata]                    |
| c39296.graph_c0 | 1.54794011    | 1.0151832     | 0.96028623    | 0              | 0              | 0              | 3.884E-22 | -Inf     | down      | glycosyltransferase family 35 protein [Micromonas sp. RCC299]                               |
| c39314.graph_c1 | 8.04413931    | 10.3372765    | 7.40355388    | 72.4483792     | 76.899011      | 71.8819778     | 2.226E-44 | 2.01194  | up        | PREDICTED: mitochondrial import inner membrane translocase subunit Tim9 [Elaeis guineensis] |
| c39316.graph_c0 | 21.5655409    | 23.4283912    | 23.3926727    | 11.4786882     | 12.2372237     | 10.4950118     | 6.699E-61 | -2.09127 | down      | PREDICTED: splicing factor 3B subunit 2 [Solanum lycopersicum]                              |
| c39319.graph_c0 | 0             | 0             | 0             | 0.97818611     | 1.40407798     | 0.90052417     | 2.821E-12 | Inf      | up        | PREDICTED: auxilin-like protein 1 [Sesamum indicum]                                         |
| c39327.graph_c0 | 0.95615242    | 0.90925437    | 1.16725903    | 8.99929257     | 9.38042359     | 9.58321253     | 1.609E-15 | 2.11154  | up        | unknown [Glycine max]                                                                       |
| c39328.graph_c0 | 11.1172394    | 9.09180693    | 9.99092767    | 74.0925726     | 69.3304573     | 64.3803619     | 5.868E-46 | 1.69251  | up        | PREDICTED: DNA-directed RNA polymerases II, IV and V subunit 9A [Sesamum indicum]           |
| c39339.graph_c0 | 1.88498907    | 1.95807949    | 2.23947158    | 12.8986717     | 13.069986      | 12.0860636     | 1.393E-17 | 1.55219  | up        | PREDICTED: WD repeat domain-containing protein 83 [Sesamum indicum]                         |
| c39340.graph_c0 | 23.7726243    | 25.4663538    | 24.3235768    | 23.2935608     | 23.8740502     | 21.9944973     | 1.656E-37 | -1.17999 | down      | PREDICTED: protein BASIC PENTACYSTEINE1-like [Sesamum indicum]                              |
| c39360.graph_c0 | 4.51259873    | 2.55969987    | 2.80278621    | 14.04818       | 14.3128986     | 14.0502259     | 2.078E-05 | 1.01719  | up        | -                                                                                           |
| c39362.graph_c0 | 0.82811828    | 0.4736843     | 0.60809416    | 9.11405561     | 7.63394848     | 8.84020154     | 4.755E-22 | 2.65677  | up        | PREDICTED: U-box domain-containing protein 4 [Sesamum indicum]                              |
| c39383.graph_c0 | 0.06582625    | 0.08785622    | 0.02819645    | 19.0092765     | 21.1377152     | 20.2481214     | 1.01E-191 | 7.29412  | up        | PREDICTED: probable auxin efflux carrier component 1c [Sesamum indicum]                     |
| c39389.graph_c0 | 53.9672251    | 50.7178065    | 61.9374802    | 35.8167483     | 34.1954373     | 42.6633065     | 3.536E-15 | -1.65603 | down      | hypothetical protein MIMGU_mgv1a004514mg [Erythranthe guttata]                              |
| c39396.graph_c0 | 6.74864984    | 3.8413102     | 3.91102925    | 0.38469646     | 0.95519828     | 1.64802312     | 1.804E-07 | -3.3592  | down      | hypothetical protein AALP_AA2G024800 [Arabis alpina]                                        |
| c39398.graph_c0 | 0.16250198    | 0.13013176    | 0.0417643     | 1.01570733     | 0.57584626     | 0.73243576     | 0.0035893 | 1.72025  | up        | -                                                                                           |
| c39416.graph_c1 | 18.7431915    | 14.07147      | 15.3272911    | 3.40561089     | 2.79540666     | 4.04211007     | 1.372E-36 | -3.31971 | down      | MYB-related transcription factor [Salvia miltiorrhiza]                                      |
| c39418.graph_c0 | 1.13938771    | 0.985002      | 1.53071097    | 11.2922785     | 8.59851593     | 10.4737093     | 3.401E-14 | 1.95968  | up        | PREDICTED: metal transporter Nramp5-like isoform X1 [Sesamum indicum]                       |
| c39418.graph_c2 | 0.56164659    | 0.64252457    | 0.61863266    | 6.00639359     | 5.73912542     | 7.04245516     | 1.623E-08 | 2.2751   | up        | PREDICTED: metal transporter Nramp5-like isoform X2 [Sesamum indicum]                       |
| c39426.graph_c0 | 0.03494053    | 0.27980412    | 0.17959984    | 21.5599929     | 22.2639803     | 20.2866076     | 3.26E-120 | 5.92061  | up        | PREDICTED: serine/threonine-protein kinase HT1-like [Sesamum indicum]                       |
| c39433.graph_c0 | 1.1490699     | 0.69013231    | 0.88596019    | 5.84596165     | 7.13834712     | 6.5420667      | 1.735E-06 | 1.75271  | up        | PREDICTED: peroxisome biogenesis factor 10-like [Sesamum indicum]                           |
| c39444.graph_c0 | 5.22940674    | 5.48793238    | 6.71999469    | 36.4744854     | 39.0768514     | 35.2652638     | 8.111E-22 | 1.57368  | up        | PREDICTED: uncharacterized protein LOC104232221 [Nicotiana sylvestris]                      |
| c39445.graph_c0 | 0.12673338    | 0.25372058    | 0             | 3.13170919     | 2.57814214     | 2.17964778     | 3.581E-07 | 3.29898  | up        | -                                                                                           |



| #ID             | 0 h-1<br>FPKM | 0 h-2<br>FPKM | 0 h-3<br>FPKM | 28 h-1<br>FPKM | 28 h-2<br>FPKM | 28 h-3<br>FPKM | FDR       | log2FC   | regulated | nr_annotation                                                                                                                            |
|-----------------|---------------|---------------|---------------|----------------|----------------|----------------|-----------|----------|-----------|------------------------------------------------------------------------------------------------------------------------------------------|
| c39446.graph_c0 | 2.88144344    | 1.71500629    | 1.90142187    | 0.11320089     | 0              | 0.0461855      | 2.561E-18 | -6.43445 | down      | PREDICTED: polyubiquitin [Sesamum indicum]                                                                                               |
| c39449.graph_c0 | 56.9708962    | 62.4224792    | 53.9887364    | 38.5284737     | 35.2567267     | 35.5807693     | 1.715E-68 | -1.75446 | down      | -                                                                                                                                        |
| c39464.graph_c0 | 2.32825901    | 1.84360137    | 2.27742023    | 10.8349087     | 9.25841521     | 10.2013812     | 1.736E-09 | 1.14117  | up        | PREDICTED: ribulose-1,5 bisphosphate carboxylase/oxygenase large subunit N-methyltransferase, chloroplastic isoform X1 [Sesamum indicum] |
| c39470.graph_c0 | 4.32948521    | 3.73417241    | 3.39412145    | 3.58202973     | 3.50226769     | 3.50425868     | 1.929E-11 | -1.20158 | down      | hypothetical protein MIMGU_mgv1a005/04mg [Erythranthe diffusa]                                                                           |
| c39481.graph_c0 | 10.0800191    | 5.35552135    | 6.37697162    | 0              | 0              | 0              | 7.319E-26 | -Inf     | down      | -                                                                                                                                        |
| c39483.graph_c0 | 0.25629874    | 0.15393323    | 0.19761242    | 2.34708328     | 2.28738631     | 2.46240101     | 3.489E-07 | 2.45757  | up        | PREDICTED: protein DYAD-like [Sesamum indicum]                                                                                           |
| c39502.graph_c1 | 1.86295396    | 1.6735559     | 1.35044439    | 12.4809569     | 11.2848073     | 12.139076      | 2.973E-28 | 1.79069  | up        | PREDICTED: guanylate-binding protein 4 isoform X1 [Sesamum indicum]                                                                      |
| c39522.graph_c0 | 62.5869409    | 58.4308949    | 58.7635145    | 39.3134462     | 38.3273536     | 36.7831251     | 1.992E-98 | -1.74199 | down      | hypothetical protein MIMGU_mgv1a011861mg [Erythranthe diffusa]                                                                           |
| c39525.graph_c0 | 2.92912773    | 2.70058233    | 2.57539928    | 20.5884443     | 16.6925538     | 18.2171455     | 1.231E-22 | 1.66886  | up        | PREDICTED: WAI1-related protein At2g5/460-like [Sesamum indicum]                                                                         |
| c39536.graph_c0 | 96.1937466    | 99.5586813    | 85.9855126    | 59.5642158     | 63.6869861     | 57.3342052     | 8.86E-86  | -1.73106 | down      | PREDICTED: ubiquitin-activating enzyme E1 1-like isoform X1 [Sesamum indicum]                                                            |
| c39539.graph_c0 | 0.36494821    | 0.18265683    | 0.30148258    | 3.35341996     | 3.4041635      | 3.46296825     | 1.157E-13 | 2.50007  | up        | PREDICTED: probable inactive leucine-rich repeat receptor-like protein kinase At5g20690 [Sesamum indicum]                                |
| c39541.graph_c0 | 3.516826      | 2.57138431    | 2.98664182    | 23.715317      | 21.6535255     | 23.142006      | 1.408E-42 | 1.82744  | up        | PREDICTED: UPF0160 protein-like [Sesamum indicum]                                                                                        |
| c39547.graph_c2 | 0.19264372    | 0.16528853    | 0.14145989    | 4.84042681     | 4.89418337     | 4.73316999     | 1.212E-26 | 3.76947  | up        | PREDICTED: homeobox-leucine zipper protein ATHB-14-like [Sesamum indicum]                                                                |
| c39550.graph_c0 | 26.0202306    | 29.5692131    | 22.0555771    | 12.5954464     | 11.1317034     | 11.0493569     | 1.212E-24 | -2.2471  | down      | PREDICTED: uncharacterized protein LOC105155212 [Sesamum indicum]                                                                        |
| c39552.graph_c0 | 0.77605837    | 0.83982214    | 0.37734379    | 7.88124232     | 7.11602288     | 8.14762909     | 7.771E-32 | 2.45581  | up        | PREDICTED: anaphase-promoting complex subunit 2 [Sesamum indicum]                                                                        |
| c39554.graph_c0 | 1.60274       | 1.79089664    | 1.5566626     | 15.4818313     | 13.8196549     | 14.4346112     | 4.752E-52 | 2.05343  | up        | PREDICTED: cleavage and polyadenylation specificity factor subunit 6 [Nicotiana glauca]                                                  |
| c39567.graph_c1 | 2.05905749    | 1.63171946    | 1.54348273    | 8.23081113     | 8.78285996     | 6.30922772     | 0.0014618 | 1.06695  | up        | PREDICTED: DCN1-like protein 1 [Sesamum indicum]                                                                                         |
| c39579.graph_c0 | 2.31561616    | 2.14749851    | 2.01294542    | 21.6559474     | 22.2348841     | 22.8815192     | 2.795E-51 | 2.27734  | up        | PREDICTED: parafibromin [Sesamum indicum]                                                                                                |
| c39585.graph_c0 | 4.73915814    | 3.95325308    | 4.19533736    | 18.9441605     | 18.3833414     | 18.8622248     | 1.396E-09 | 1.03499  | up        | PREDICTED: E3 ubiquitin ligase BIG BROTHER-like isoform X2 [Sesamum indicum]                                                             |
| c39586.graph_c0 | 1.5916474     | 1.41621439    | 1.5150592     | 11.9964461     | 11.1024577     | 10.9427058     | 1.915E-12 | 1.82157  | up        | PREDICTED: uncharacterized protein LOC105155506 isoform X4 [Sesamum indicum]                                                             |
| c39590.graph_c0 | 0.09643865    | 0.09653522    | 0.04130916    | 0.93454742     | 0.67504696     | 0.99135798     | 2.82E-06  | 2.39296  | up        | PREDICTED: pentatricopeptide repeat-containing protein At3g09040, mitochondrial [Sesamum indicum]                                        |
| c39594.graph_c0 | 1.82864045    | 1.54446037    | 1.3952385     | 10.840026      | 11.887533      | 8.98093399     | 2.718E-10 | 1.64471  | up        | unnamed protein product [Coffea canephora]                                                                                               |
| c39612.graph_c0 | 2.11962849    | 2.81456762    | 3.05733386    | 16.3799611     | 16.8050382     | 15.5978426     | 5.693E-18 | 1.51502  | up        | PREDICTED: MOB kinase activator-like 1 [Sesamum indicum]                                                                                 |
| c39649.graph_c0 | 4.9320028     | 9.35420486    | 7.00495769    | 3.01856944     | 3.40685648     | 1.23156401     | 7.132E-06 | -2.5719  | down      | -                                                                                                                                        |

| #ID             | 0 h-1<br>FPKM | 0 h-2<br>FPKM | 0 h-3<br>FPKM | 28 h-1<br>FPKM | 28 h-2<br>FPKM | 28 h-3<br>FPKM | FDR       | log2FC   | regulated | nr_annotation                                                                                      |
|-----------------|---------------|---------------|---------------|----------------|----------------|----------------|-----------|----------|-----------|----------------------------------------------------------------------------------------------------|
| c39654.graph_c0 | 4.34557966    | 4.26070175    | 4.15238501    | 25.0561819     | 29.7599123     | 27.873209      | 1.436E-35 | 1.60615  | up        | PREDICTED: glucan endo-1,3-beta-glucosidase 3 [Sesamum indicum]                                    |
| c39655.graph_c0 | 0.76196945    | 0.65377067    | 1.95832182    | 6.40819932     | 5.42884247     | 6.39104683     | 0.0008466 | 1.32912  | up        | PREDICTED: UDP-arabinose 4-epimerase 1-like [Sesamum indicum]                                      |
| c39655.graph_c1 | 0.11906544    | 0.357554      | 0.45901141    | 6.66327777     | 4.06296603     | 5.5784057      | 3.844E-08 | 3.02099  | up        | PREDICTED: probable UDP-arabinose 4-epimerase 3 [Sesamum indicum]                                  |
| c39662.graph_c0 | 0.46078635    | 0.6259791     | 0.33835926    | 12.8935292     | 12.5271908     | 10.8528462     | 8.106E-50 | 3.58298  | up        | PREDICTED: folic acid synthesis protein fol1 isoform X2 [Sesamum indicum]                          |
| c39674.graph_c0 | 0.5809124     | 0.74008339    | 0.67863221    | 3.93417159     | 4.53986965     | 4.91716631     | 6.18E-10  | 1.65228  | up        | PREDICTED: auxin response factor 18-like [Sesamum indicum]                                         |
| c39675.graph_c0 | 49.7075032    | 52.2378459    | 50.2017518    | 33.937604      | 34.1818238     | 33.2256059     | 1.164E-79 | -1.67685 | down      | LIM domain and RING finger protein [Medicago truncatula]                                           |
| c39682.graph_c0 | 25.042137     | 26.16026      | 23.8544624    | 12.7509183     | 13.4237357     | 12.4769396     | 1.7E-57   | -2.04751 | down      | PREDICTED: uncharacterized protein LOC105170284 [Sesamum indicum]                                  |
| c39688.graph_c1 | 65.0624152    | 69.5398775    | 66.6738114    | 48.7886923     | 49.2040266     | 51.2480372     | 4.802E-73 | -1.522   | down      | PREDICTED: delta(3,5)-Delta(2,4)-dienoyl-CoA isomerase, mitochondrial [Sesamum indicum]            |
| c39689.graph_c0 | 0.45674427    | 0.3657613     | 0.23477379    | 2.12453826     | 2.31789611     | 2.09477376     | 8.144E-05 | 1.5451   | up        | PREDICTED: uncharacterized protein LOC105163339 [Sesamum indicum]                                  |
| c39695.graph_c0 | 28.1681222    | 25.4109025    | 25.5952134    | 542.891914     | 572.224302     | 543.169473     | 0         | 3.29879  | up        | hypothetical protein MIMGU_mgv1a004/02mg [Erythranthe diffusa]                                     |
| c39709.graph_c0 | 31.446007     | 35.061271     | 31.2079908    | 12.7934708     | 13.7440947     | 12.9165058     | 4.34E-105 | -2.39873 | down      | PREDICTED: uncharacterized protein LOC105156369 [Sesamum indicum]                                  |
| c39709.graph_c1 | 15.2156393    | 16.5279087    | 14.5099104    | 15.8211185     | 16.2285222     | 15.7641339     | 9.887E-22 | -1.04192 | down      | PREDICTED: F-box/kelch-repeat protein At5g15710-like [Sesamum indicum]                             |
| c39711.graph_c0 | 0.097301      | 0.06493229    | 0             | 0.68360543     | 0.68108315     | 1.15410299     | 0.0003418 | 2.89124  | up        | PREDICTED: LOW QUALITY PROTEIN: BTB/POZ domain-containing protein At3g22104-like [Sesamum indicum] |
| c39713.graph_c0 | 27.0728429    | 27.4641989    | 25.5778927    | 26.7905634     | 24.4281563     | 27.5149292     | 1.431E-33 | -1.11442 | down      | PREDICTED: eukaryotic translation initiation factor 4G-like [Sesamum indicum]                      |
| c39715.graph_c0 | 19.5371557    | 20.5964435    | 19.5763385    | 9.23865691     | 8.99079593     | 8.80000225     | 1.444E-74 | -2.234   | down      | PREDICTED: serine carboxypeptidase-like 50 [Sesamum indicum]                                       |
| c39715.graph_c1 | 26.3388863    | 24.9054392    | 21.9775168    | 23.4790218     | 22.0983704     | 21.4388625     | 1.306E-34 | -1.21633 | down      | PREDICTED: zinc finger CCHC domain-containing protein 10 [Sesamum indicum]                         |
| c39718.graph_c0 | 0.35238792    | 0.61729637    | 0.56604053    | 51.094645      | 59.2569119     | 51.4890567     | 4.64E-146 | 5.62444  | up        | PREDICTED: GDSL esterase/lipase At1g1691 [Sesamum indicum]                                         |
| c39721.graph_c0 | 76.9641607    | 73.1921743    | 69.1001439    | 19.3880376     | 20.9357276     | 19.8468639     | 1.5E-227  | -2.95489 | down      | PREDICTED: UDP-glucuronic acid decarboxylase 2-like [Sesamum indicum]                              |
| c39727.graph_c0 | 4.19624405    | 3.85483964    | 3.78828931    | 3.01120085     | 3.57282416     | 3.59116852     | 3.03E-13  | -1.30768 | down      | -                                                                                                  |
| c39735.graph_c0 | 1.33993719    | 1.82901672    | 0.78266924    | 11.0665753     | 11.2710661     | 7.22418804     | 2.659E-05 | 1.8175   | up        | -                                                                                                  |
| c39737.graph_c0 | 0.33116918    | 0.57259229    | 0.38687774    | 14.944776      | 14.1852111     | 14.5159366     | 3.183E-72 | 3.98909  | up        | PREDICTED: LRR receptor-like serine/threonine-protein kinase FEI 1 [Sesamum indicum]               |
| c39750.graph_c0 | 1.53840651    | 1.11770346    | 0.98845664    | 10.1711486     | 11.2840963     | 11.1249611     | 1.555E-30 | 2.07476  | up        | PREDICTED: uncharacterized membrane protein At3g27390 [Sesamum indicum]                            |

| #ID             | 0 h-1<br>FPKM | 0 h-2<br>FPKM | 0 h-3<br>FPKM | 28 h-1<br>FPKM | 28 h-2<br>FPKM | 28 h-3<br>FPKM | FDR       | log2FC   | regulated | nr_annotation                                                                                        |
|-----------------|---------------|---------------|---------------|----------------|----------------|----------------|-----------|----------|-----------|------------------------------------------------------------------------------------------------------|
| c39753.graph_c0 | 30.1535127    | 28.5156599    | 27.756132     | 17.9936962     | 17.7775521     | 18.3251505     | 4.17E-101 | -1.7654  | down      | PREDICTED: RNA polymerase-associated protein RTF1 homolog [Sesamum indicum]                          |
| c39760.graph_c0 | 75.0796781    | 73.5094568    | 75.9283297    | 52.4364397     | 49.8232312     | 52.5888315     | 1.239E-84 | -1.62655 | down      | PREDICTED: uncharacterized protein LOC105175444 [Sesamum indicum]                                    |
| c39762.graph_c0 | 2.35388898    | 2.7282849     | 2.8656384     | 17.8882912     | 13.8750709     | 17.5601234     | 2.403E-12 | 1.54164  | up        | PREDICTED: flavonol synthase/flavanone 3-hydroxylase-like [Sesamum indicum]                          |
| c39764.graph_c0 | 59.6739735    | 53.9118827    | 65.3191202    | 22.6407793     | 23.1611967     | 22.4909282     | 1.832E-34 | -2.48159 | down      | PREDICTED: putative cytochrome c oxidase subunit 6b-like isoform X2 [Sesamum indicum]                |
| c39775.graph_c0 | 1.27748844    | 1.0893206     | 1.45922065    | 13.5831903     | 12.6990331     | 12.7393232     | 6.93E-44  | 2.25737  | up        | PREDICTED: LOW QUALITY PROTEIN: ARF guanine-nucleotide exchange factor GNOM [Sesamum indicum]        |
| c39776.graph_c0 | 0.26292315    | 0.31582372    | 0.13514666    | 1.22298261     | 1.13874609     | 1.21624403     | 0.0086458 | 1.24289  | up        | -                                                                                                    |
| c39778.graph_c0 | 1.32659878    | 0.90687709    | 1.24736485    | 6.18476157     | 6.00891836     | 6.06373353     | 6.689E-08 | 1.30027  | up        | PREDICTED: uncharacterized protein LOC105176769 [Sesamum indicum]                                    |
| c39783.graph_c0 | 22.6527503    | 23.1350708    | 21.8322608    | 16.6492925     | 15.3675552     | 14.1605822     | 1.29E-48  | -1.64076 | down      | PREDICTED: histone H2AX [Beta vulgaris subsp. vulgaris]                                              |
| c39791.graph_c0 | 10.9044414    | 9.86122918    | 10.782311     | 9.06099583     | 9.18437774     | 10.2947684     | 1.596E-22 | -1.23466 | down      | hypothetical protein M569_06867, partial [Genlisea aurea]                                            |
| c39798.graph_c1 | 44.6331686    | 44.1613549    | 43.8572172    | 46.4219751     | 43.5351666     | 41.6176744     | 8.696E-39 | -1.10242 | down      | PREDICTED: LOW QUALITY PROTEIN: mitogen-activated protein kinase homolog MMK1-like [Sesamum indicum] |
| c39800.graph_c0 | 5.72728228    | 6.36588284    | 4.97024407    | 5.75730114     | 5.4667601      | 5.4919238      | 4.65E-11  | -1.11817 | down      | PREDICTED: cyclin-dependent kinase inhibitor 3 isoform X2 [Sesamum indicum]                          |
| c39801.graph_c0 | 19.2034721    | 23.0502305    | 19.6544245    | 11.9190078     | 12.2115154     | 9.97777707     | 1.023E-32 | -1.9512  | down      | hypothetical protein VITISV_001313 [Vitis vinifera]                                                  |
| c39804.graph_c0 | 0.8507405     | 1.36254783    | 2.07714694    | 11.067808      | 9.32325819     | 9.0816948      | 5.129E-08 | 1.67886  | up        | -                                                                                                    |
| c39812.graph_c0 | 105.887973    | 109.314788    | 96.136581     | 42.7603388     | 44.4731707     | 44.9702391     | 2.99E-162 | -2.32481 | down      | hypothetical protein M569_12244, partial [Genlisea aurea]                                            |
| c39821.graph_c0 | 8.01847922    | 8.83282444    | 7.81038585    | 8.54209507     | 9.27447484     | 8.25142159     | 7.309E-13 | -1.01035 | down      | PREDICTED: tubulin beta chain [Vitis vinifera]                                                       |
| c39822.graph_c0 | 3.20402339    | 2.15168711    | 2.60588412    | 12.4981553     | 15.9954767     | 11.954248      | 4.352E-07 | 1.25518  | up        | PREDICTED: uric acid degradation bifunctional protein TTL isoform X1 [Sesamum indicum]               |
| c39823.graph_c0 | 18.4329858    | 19.8707854    | 15.8110033    | 12.299964      | 12.0662085     | 11.8541213     | 8.944E-31 | -1.6677  | down      | hypothetical protein MIMGU_mgv1a001998mg [Erythranthe yuffata]                                       |
| c39824.graph_c0 | 0.41940471    | 0.64881996    | 0.19598242    | 8.83980691     | 10.0081716     | 8.75082247     | 5.662E-31 | 3.36602  | up        | PREDICTED: apurinic endonuclease-redox protein [Sesamum indicum]                                     |
| c39835.graph_c0 | 1.29639201    | 0.97326761    | 0.83295753    | 7.3806469      | 6.2386684      | 6.85545312     | 1.324E-07 | 1.63701  | up        | PREDICTED: methionine aminopeptidase 2B [Sesamum indicum]                                            |
| c39843.graph_c0 | 0             | 0             | 0.5181663     | 1.52393863     | 2.11688261     | 1.67397122     | 0.0018674 | 2.22765  | up        | PREDICTED: uncharacterized protein LOC105177798 [Sesamum indicum]                                    |
| c39865.graph_c0 | 0.7211291     | 0.56988253    | 0.56088493    | 8.48234662     | 7.3723384      | 6.88776204     | 2.323E-36 | 2.52999  | up        | PREDICTED: uncharacterized protein LOC105169651 [Sesamum indicum]                                    |
| c39874.graph_c0 | 0.59010848    | 0.72968747    | 0.75831276    | 6.23148224     | 6.4009345      | 5.72301674     | 1.351E-13 | 2.04917  | up        | PREDICTED: uncharacterized protein LOC105156620 [Sesamum indicum]                                    |

| #ID             | 0 h-1<br>FPKM | 0 h-2<br>FPKM | 0 h-3<br>FPKM | 28 h-1<br>FPKM | 28 h-2<br>FPKM | 28 h-3<br>FPKM | FDR       | log2FC   | regulated | nr_annotation                                                                             |
|-----------------|---------------|---------------|---------------|----------------|----------------|----------------|-----------|----------|-----------|-------------------------------------------------------------------------------------------|
| c39877.graph_c0 | 12.6592941    | 14.1862311    | 14.3749121    | 13.1355934     | 12.9051616     | 14.2362947     | 1.495E-18 | -1.12484 | down      | hypothetical protein MIMGU_mgv1a019094mg, partial [Erythranthe guttata]                   |
| c39878.graph_c0 | 71.4927016    | 67.0544349    | 76.025879     | 38.5610553     | 41.9360278     | 40.4656957     | 4.508E-46 | -1.91854 | down      | PREDICTED: uncharacterized protein LOC105157942 isoform X1 [Sesamum indicum]              |
| c39881.graph_c0 | 652.275533    | 554.684526    | 688.800879    | 59.2828218     | 58.1148438     | 58.6773958     | 1.174E-68 | -4.52028 | down      | -                                                                                         |
| c39883.graph_c0 | 0             | 0.1269072     | 0             | 2.53393667     | 2.53749712     | 3.00752238     | 1.445E-12 | 4.9115   | up        | PREDICTED: adenine phosphoribosyltransferase 5-like isoform X1 [Sesamum indicum]          |
| c39885.graph_c0 | 0.05817756    | 0.01941194    | 0.04984031    | 0.4510199      | 0.50903585     | 0.62104819     | 4.951E-07 | 2.54373  | up        | --                                                                                        |
| c39886.graph_c0 | 85.567761     | 80.6418064    | 81.518036     | 50.612201      | 47.3408133     | 51.252776      | 6.51E-102 | -1.82124 | down      | PREDICTED: membrane-anchored ubiquitin-fold protein 3 [Sesamum indicum]                   |
| c39894.graph_c0 | 392.557405    | 381.642285    | 443.490563    | 41.6168886     | 31.6913415     | 52.7919198     | 7.003E-88 | -4.36176 | down      | PREDICTED: beta-amyrin 28-oxidase-like [Sesamum indicum]                                  |
| c39900.graph_c0 | 18.3967698    | 19.5719245    | 16.9879527    | 17.0772748     | 17.1885918     | 16.6487989     | 4.951E-46 | -1.19969 | down      | PREDICTED: septin and tuftelin-interacting protein 1 homolog 1 [Sesamum indicum]          |
| c39908.graph_c0 | 5.05182786    | 6.08067333    | 5.45629715    | 1.91465857     | 2.03383196     | 1.80129275     | 2.626E-45 | -2.6201  | down      | -                                                                                         |
| c39912.graph_c0 | 11.8171362    | 13.1227627    | 13.0203694    | 62.0494712     | 62.9162603     | 61.3769311     | 2.282E-46 | 1.20378  | up        | hypothetical protein MIMGU_mgv1a002912mg [Erythranthe guttata]                            |
| c39913.graph_c0 | 0.4939992     | 1.29329165    | 0.1953257     | 98.4310378     | 103.686331     | 99.9704665     | 0         | 6.17042  | up        | PREDICTED: uncharacterized protein LOC105168623 [Sesamum indicum]                         |
| c39917.graph_c0 | 11.3335328    | 10.501396     | 12.9397962    | 6.15489373     | 7.32677796     | 6.49656311     | 4.805E-19 | -1.89256 | down      | PREDICTED: protein OPI10 homolog [Sesamum indicum]                                        |
| c39921.graph_c0 | 17.4650339    | 19.7850986    | 18.2283063    | 10.0309499     | 8.80542373     | 9.92831194     | 5.446E-68 | -2.03799 | down      | PREDICTED: autophagy-related protein 18a-like [Sesamum indicum]                           |
| c39926.graph_c0 | 1055.18742    | 1151.14368    | 1166.76017    | 52.418733      | 46.4805396     | 56.401703      | 2.01E-245 | -5.53181 | down      | -                                                                                         |
| c39935.graph_c0 | 5.86637835    | 6.32396438    | 4.73574222    | 2.24114934     | 2.81322489     | 2.85464908     | 2.079E-16 | -2.1849  | down      | MYB5b [Vitis vinifera]                                                                    |
| c39936.graph_c0 | 4.58045339    | 5.42316561    | 5.94935496    | 33.433656      | 39.6573976     | 33.5031949     | 3.101E-24 | 1.64614  | up        | PREDICTED: ABC transporter I family member 19-like [Nicotiana sylvestris]                 |
| c39938.graph_c0 | 1.43519285    | 1.40539889    | 1.08251196    | 0.70295188     | 0.81896728     | 0.61060964     | 2.137E-09 | -1.9676  | down      | PREDICTED: thioredoxin reductase NTRC [Sesamum indicum]                                   |
| c39942.graph_c0 | 0.84248656    | 1.05416273    | 0.99240953    | 5.23018529     | 5.41344503     | 5.64180819     | 1.572E-07 | 1.40318  | up        | PREDICTED: uncharacterized protein LOC105158797 [Sesamum indicum]                         |
| c39944.graph_c1 | 1.46626252    | 1.01222811    | 1.23447939    | 8.89284201     | 10.252419      | 8.36594926     | 1.251E-11 | 1.79948  | up        | Reticulon-4-interacting 1, mitochondrial [Gossypium arboreum]                             |
| c39945.graph_c0 | 0.07594888    | 0.15204986    | 0.19519463    | 23.4044638     | 28.209275      | 24.0975247     | 5.482E-69 | 6.38231  | up        | PREDICTED: protodermal factor 1-like [Sesamum indicum]                                    |
| c39951.graph_c0 | 10.0060133    | 10.246817     | 9.48064385    | 47.5548933     | 48.6868319     | 45.5315952     | 1.111E-26 | 1.16337  | up        | PREDICTED: peptide chain release factor PrfB2, chloroplastic isoform X1 [Sesamum indicum] |
| c39953.graph_c0 | 0.30958405    | 0.2213529     | 0.28416269    | 5.59295424     | 6.53006029     | 6.34736096     | 4.009E-20 | 3.41192  | up        | hypothetical protein MIMGU_mgv1a010093mg [Erythranthe guttata]                            |
| c39981.graph_c0 | 4.54478588    | 3.90599624    | 4.01147097    | 43.4744527     | 45.9411864     | 44.9764903     | 5.069E-75 | 2.34151  | up        | PREDICTED: 2-aminoethanethiol dioxygenase-like isoform X1 [Sesamum indicum]               |
| c39982.graph_c0 | 11.1973922    | 13.5376654    | 10.4647944    | 5.98915161     | 10.0518529     | 6.98567653     | 3.119E-13 | -1.70252 | down      | hypothetical protein MIMGU_mgv1a011446mg [Erythranthe guttata]                            |

| #ID             | 0 h-1<br>FPKM | 0 h-2<br>FPKM | 0 h-3<br>FPKM | 28 h-1<br>FPKM | 28 h-2<br>FPKM | 28 h-3<br>FPKM | FDR       | log2FC   | regulated | nr_annotation                                                                                        |
|-----------------|---------------|---------------|---------------|----------------|----------------|----------------|-----------|----------|-----------|------------------------------------------------------------------------------------------------------|
| c39988.graph_c0 | 86.2966659    | 90.8810335    | 99.1667717    | 12.8198542     | 12.0513182     | 13.6719942     | 3.633E-91 | -3.93368 | down      | hypothetical protein JCGZ_17893 [Jatropha curcas]                                                    |
| c39996.graph_c0 | 1.90481188    | 1.82381842    | 1.27709148    | 8.87825775     | 8.42383947     | 9.16010343     | 1.956E-08 | 1.31696  | up        | PREDICTED: exosome complex component MIR3 [Sesamum indicum]                                          |
| c39997.graph_c0 | 14.6520722    | 12.7245725    | 12.5523286    | 64.1373787     | 65.81285       | 70.0320651     | 7.076E-29 | 1.23584  | up        | Pollen-specific protein SF3, putative [Solanum lycopersicum]                                         |
| c40001.graph_c0 | 2.34215324    | 1.8399862     | 2.43828629    | 12.1959636     | 10.6810682     | 11.6045803     | 1.446E-14 | 1.28922  | up        | PREDICTED: protein IQ-DOMAIN 1-like [Sesamum indicum]                                                |
| c40010.graph_c0 | 4.97607701    | 4.71889876    | 3.77684241    | 36.9483766     | 37.4474893     | 37.8293448     | 6.584E-71 | 1.97131  | up        | PREDICTED: protein KKP45A-like isoform X1 [Sesamum indicum]                                          |
| c40013.graph_c0 | 2.67608149    | 2.47270263    | 2.99798981    | 0.39896628     | 0.13508593     | 0.12208246     | 1.659E-27 | -4.72861 | down      | PREDICTED: transcription repressor OFP7 [Sesamum indicum]                                            |
| c40024.graph_c0 | 16.1854622    | 15.7848169    | 16.3394915    | 7.99030232     | 7.99788584     | 9.00619124     | 7.776E-83 | -2.04088 | down      | PREDICTED: pheophytinase, chloroplastic [Sesamum indicum]                                            |
| c40027.graph_c0 | 74.765173     | 72.4832512    | 77.1820432    | 30.5219768     | 28.2837065     | 31.0038718     | 8.46E-153 | -2.41208 | down      | hypothetical protein MIMGU_mgv1a025482mg [Erythranthe diffusa]                                       |
| c40032.graph_c0 | 92.7411866    | 103.667521    | 88.1293072    | 64.3436867     | 62.4169169     | 66.2792899     | 5.666E-46 | -1.64904 | down      | PREDICTED: ubiquitin-activating enzyme E1 1-like isoform X2 [Sesamum indicum]                        |
| c40037.graph_c0 | 61.9454695    | 58.230392     | 60.2068769    | 29.2526198     | 42.0947195     | 30.3968244     | 7.34E-30  | -1.91755 | down      | elicitor and UV light related transcription factor [Oryza sativa]                                    |
| c40039.graph_c0 | 1.7391013     | 1.56380789    | 1.32573714    | 0.2356552      | 0.25146083     | 0.33214197     | 1.7E-24   | -3.58399 | down      | hypothetical protein [Vitis hybrid cultivar]                                                         |
| c40040.graph_c0 | 0.86367174    | 1.40487193    | 1.47980317    | 20.7929481     | 22.0093647     | 20.6376967     | 5.88E-66  | 2.98498  | up        | PREDICTED: G-type lectin S-receptor-like serine/threonine-protein kinase At1g11330 [Sesamum indicum] |
| c40045.graph_c0 | 7.77920686    | 8.26375145    | 8.10947765    | 5.30772663     | 6.09465653     | 5.13136644     | 1.077E-24 | -1.6383  | down      | unnamed protein product [Coffea canephora]                                                           |
| c40053.graph_c0 | 18.8819513    | 18.0194715    | 17.0979869    | 85.1128608     | 84.1678792     | 81.1136644     | 4.238E-22 | 1.12363  | up        | PREDICTED: serine/threonine-protein phosphatase PP2A-2 catalytic subunit [Sesamum indicum]           |
| c40056.graph_c0 | 0.69253372    | 0.9358567     | 1.02342324    | 7.12211267     | 7.58947135     | 7.18747357     | 4.699E-15 | 1.95091  | up        | PREDICTED: uncharacterized protein LOC105176075 isoform X2 [Sesamum indicum]                         |
| c40061.graph_c0 | 1.74351121    | 0.96958726    | 1.12024047    | 6.12467385     | 6.35632902     | 7.69758202     | 3.402E-06 | 1.31136  | up        | PREDICTED: uncharacterized protein LOC105157824 isoform X1 [Sesamum indicum]                         |
| c40063.graph_c0 | 2.69619634    | 2.6624246     | 2.43466743    | 15.0411002     | 16.5455047     | 16.4221749     | 2.104E-20 | 1.53386  | up        | PREDICTED: zinc finger protein VAK5, chloroplastic [Sesamum indicum]                                 |
| c40070.graph_c0 | 6.73457168    | 7.90512548    | 5.29963503    | 3.38001743     | 3.72842574     | 3.53865152     | 7.719E-12 | -1.9924  | down      | PREDICTED: protein TRM32 isoform X2 [Sesamum indicum]                                                |
| c40072.graph_c0 | 0.90089815    | 0.75150022    | 0.72355612    | 3.81947757     | 3.05450098     | 3.25023376     | 0.0025282 | 1.00306  | up        | PREDICTED: putative zinc finger protein At1g68190 isoform X1 [Sesamum indicum]                       |
| c40081.graph_c0 | 0.56837703    | 0.42670963    | 0.41084268    | 4.44075138     | 4.12613976     | 3.93962996     | 8.632E-10 | 2.06582  | up        | PREDICTED: KING-H2 finger protein A1L52-like [Sesamum indicum]                                       |
| c40085.graph_c0 | 0.29534307    | 0.25340469    | 0.16265466    | 2.69850288     | 2.29805787     | 2.30204524     | 5.084E-07 | 2.27508  | up        | PREDICTED: uncharacterized protein LOC105172351 [Sesamum indicum]                                    |
| c40091.graph_c0 | 2.26961146    | 2.59643901    | 1.24994596    | 25.4500538     | 27.181193      | 25.2857893     | 4.524E-30 | 2.58767  | up        | PREDICTED: universal stress protein A-like protein [Sesamum indicum]                                 |
| c40095.graph_c0 | 0.03654176    | 0.18289173    | 0.23478802    | 7.94094294     | 7.69748009     | 7.95339888     | 3.771E-38 | 4.5937   | up        | PREDICTED: alcohol-forming fatty acyl-CoA reductase-like isoform X1 [Sesamum indicum]                |
| c40096.graph_c0 | 51.9092037    | 47.4031844    | 47.1640833    | 45.4451113     | 46.0391345     | 45.5612466     | 2.847E-49 | -1.18557 | down      | PREDICTED: uncharacterized protein LOC105168199 [Sesamum indicum]                                    |
| c40099.graph_c0 | 0             | 0.09194924    | 0             | 4.1725831      | 4.67163963     | 4.05851413     | 9.687E-22 | 6.05045  | up        | PREDICTED: glucan 1,3-beta-glucosidase A-like [Sesamum indicum]                                      |

| #ID             | 0 h-1<br>FPKM | 0 h-2<br>FPKM | 0 h-3<br>FPKM | 28 h-1<br>FPKM | 28 h-2<br>FPKM | 28 h-3<br>FPKM | FDR       | log2FC   | regulated | nr_annotation                                                                                                                 |
|-----------------|---------------|---------------|---------------|----------------|----------------|----------------|-----------|----------|-----------|-------------------------------------------------------------------------------------------------------------------------------|
| c40100.graph_c0 | 0.40807616    | 0.22280988    | 0.19068874    | 4.28703607     | 4.28464984     | 4.42223566     | 1.882E-14 | 2.90156  | up        | PREDICTED: uncharacterized protein LOC105169180 [Sesamum indicum]                                                             |
| c40100.graph_c1 | 0.36630627    | 0.22917067    | 0.11767952    | 2.92852217     | 3.42541622     | 3.04137295     | 5.13E-09  | 2.6411   | up        | -                                                                                                                             |
| c40102.graph_c0 | 1.28530288    | 1.85420312    | 1.06872447    | 19.232515      | 18.456682      | 19.3030974     | 2.728E-48 | 2.67235  | up        | PREDICTED: protein Brevis radix-like 2 [Sesamum indicum]                                                                      |
| c40109.graph_c0 | 0.43065006    | 0.64662194    | 0.33204143    | 2.09705968     | 2.76952135     | 2.37522496     | 0.0019396 | 1.27461  | up        | PREDICTED: uncharacterized protein LOC101260668 [Solanum lycopersicum]                                                        |
| c40115.graph_c0 | 31.1628105    | 34.853573     | 29.5746882    | 33.1204142     | 31.4361564     | 30.4502393     | 1.028E-25 | -1.09861 | down      | PREDICTED: LOW QUALITY PROTEIN: DEAD-box ATP-dependent RNA helicase 42 [Sesamum indicum]                                      |
| c40116.graph_c0 | 34.6005774    | 36.3686526    | 35.5191365    | 16.555236      | 14.8385581     | 14.2989337     | 4.81E-142 | -2.31175 | down      | PREDICTED: LOW QUALITY PROTEIN: uncharacterized protein LOC105178147 [Sesamum indicum]                                        |
| c40121.graph_c0 | 2.04138988    | 2.64889595    | 2.67184583    | 16.512702      | 16.6955754     | 15.6937787     | 1.649E-22 | 1.63816  | up        | hypothetical protein MIMGU_mgv1a00/bz1mg [Erythranthe diffusa]                                                                |
| c40126.graph_c0 | 19.5486758    | 20.5900916    | 19.5129103    | 7.4192506      | 7.50275419     | 7.7340462      | 6.3E-139  | -2.48687 | down      | PREDICTED: cryptochrome-1 isoform X1 [Sesamum indicum]                                                                        |
| c40127.graph_c0 | 312.704077    | 328.723827    | 320.467489    | 349.072322     | 338.545394     | 333.928702     | 2.453E-32 | -1.00403 | down      | PREDICTED: protein YLS9-like [Sesamum indicum]                                                                                |
| c40129.graph_c0 | 0.02007546    | 0.04019112    | 0             | 0.80248993     | 0.60600665     | 0.86913167     | 7.09E-11  | 4.16719  | up        | PREDICTED: probable linoleate 9S-lipoxygenase 5 isoform X1 [Sesamum indicum]                                                  |
| c40130.graph_c0 | 0             | 0.03273848    | 0             | 17.1384143     | 15.409994      | 15.9632391     | 1.25E-110 | 9.45147  | up        | PREDICTED: bifunctional 3-dehydroquinate dehydratase/shikimate dehydrogenase, chloroplastic-like isoform X1 [Sesamum indicum] |
| c40132.graph_c0 | 0.32051135    | 0.14583286    | 0.37442707    | 1.33414414     | 1.31933156     | 1.43425413     | 0.0030158 | 1.18694  | up        | PREDICTED: putative pentatricopeptide repeat-containing protein At3g05240 isoform X1 [Sesamum indicum]                        |
| c40136.graph_c1 | 1.12724178    | 1.60347392    | 1.44855031    | 0.30183736     | 0.23359786     | 0.24629682     | 1.923E-15 | -3.51129 | down      | -                                                                                                                             |
| c40148.graph_c0 | 3.6894133     | 3.13750742    | 4.61517378    | 36.7571439     | 36.0378594     | 34.7762289     | 2.476E-74 | 2.13845  | up        | PREDICTED: signal peptide peptidase-like 2 [Sesamum indicum]                                                                  |
| c40152.graph_c0 | 43.6727573    | 45.0671868    | 44.0680585    | 43.987866      | 45.591308      | 45.6332588     | 5.611E-37 | -1.06463 | down      | PREDICTED: peptide methionine sulfoxide reductase A1-like [Nicotiana tomentosiformis]                                         |
| c40153.graph_c0 | 0.13820625    | 0.27668928    | 0.88800251    | 7.13177289     | 8.43460521     | 7.45875533     | 3.193E-10 | 3.0305   | up        | Lysine decarboxylase family protein isoform 3 [Theobroma cacao]                                                               |
| c40154.graph_c0 | 8.15228533    | 6.81220058    | 6.14896205    | 37.4307582     | 35.8433262     | 35.1887854     | 3.696E-30 | 1.27352  | up        | PREDICTED: serine/threonine-protein kinase At5g01020 [Sesamum indicum]                                                        |
| c40159.graph_c0 | 51.0736622    | 52.3218119    | 48.485756     | 49.6992324     | 46.0921323     | 44.4920092     | 3.786E-49 | -1.20467 | down      | PREDICTED: pentatricopeptide repeat-containing protein At5g01110 [Sesamum indicum]                                            |
| c40161.graph_c0 | 73.0220927    | 73.9855503    | 65.692891     | 39.2105698     | 38.4749583     | 38.5329646     | 9.92E-126 | -1.96113 | down      | PREDICTED: DNA-directed RNA polymerase II subunit RPB2 [Sesamum indicum]                                                      |
| c40167.graph_c0 | 5.18621546    | 4.80968744    | 5.09637638    | 23.8907832     | 21.9715296     | 21.6205544     | 1.128E-15 | 1.06998  | up        | PREDICTED: probable methyltransferase PM125 [Sesamum indicum]                                                                 |
| c40167.graph_c1 | 1.54231144    | 1.54385584    | 1.5155945     | 7.45097452     | 7.73963788     | 6.18754382     | 0.0013764 | 1.12458  | up        | PREDICTED: probable methyltransferase PM125 [Sesamum indicum]                                                                 |
| c40171.graph_c0 | 0.033963      | 0.0169985     | 0.0218219     | 3.72730078     | 3.25396595     | 3.52485579     | 6.921E-43 | 6.08767  | up        | PREDICTED: 125 kDa kinesin-related protein-like [Sesamum indicum]                                                             |
| c40173.graph_c0 | 55.1260178    | 51.5620071    | 53.7629061    | 305.88163      | 312.326803     | 310.053778     | 1.243E-74 | 1.44199  | up        | PREDICTED: 40S ribosomal protein S5-like, partial [Nicotiana glauca]                                                          |

| #ID             | 0 h-1<br>FPKM | 0 h-2<br>FPKM | 0 h-3<br>FPKM | 28 h-1<br>FPKM | 28 h-2<br>FPKM | 28 h-3<br>FPKM | FDR       | log2FC   | regulated | nr_annotation                                                                                    |
|-----------------|---------------|---------------|---------------|----------------|----------------|----------------|-----------|----------|-----------|--------------------------------------------------------------------------------------------------|
| c40175.graph_c0 | 379.855921    | 371.686769    | 378.37508     | 336.521564     | 321.706828     | 339.288619     | 7.997E-53 | -1.27018 | down      | hypothetical protein EUTSA_v10026962mg [Eutrema salsugineum]                                     |
| c40179.graph_c0 | 0             | 0             | 0             | 0.98127046     | 1.29945966     | 1.5213465      | 2.671E-14 | Inf      | up        | PREDICTED: KING-HZ finger protein A1L46-like [Sesamum indicum]                                   |
| c40181.graph_c0 | 4.19194185    | 4.52250585    | 5.98534583    | 89.8431838     | 91.7260867     | 89.1392536     | 1.59E-181 | 3.10752  | up        | PREDICTED: histone deacetylase HDT1 [Sesamum indicum]                                            |
| c40182.graph_c0 | 10.017294     | 9.83705296    | 7.98737481    | 9.07646313     | 9.09329879     | 10.1005518     | 6.184E-15 | -1.06512 | down      | PREDICTED: WPP domain-associated protein [Sesamum indicum]                                       |
| c40184.graph_c0 | 54.8806914    | 54.255137     | 58.6110469    | 5.56980215     | 4.86678302     | 5.86440396     | 5.67E-217 | -4.45404 | down      | PREDICTED: ADP-ribosylation factor-like protein 8B isoform X1 [Nelumbo nucifera]                 |
| c40186.graph_c0 | 0             | 0.04339346    | 0.05570654    | 1.16574313     | 1.05255675     | 1.0797824      | 3.4E-10   | 3.94743  | up        | PREDICTED: tetratricopeptide repeat protein 7A-like [Sesamum indicum]                            |
| c40190.graph_c0 | 50.8635568    | 53.8755901    | 42.9760993    | 22.9328894     | 19.681721      | 20.0775437     | 2.622E-46 | -2.32483 | down      | PREDICTED: SNF1-related protein kinase regulatory subunit beta-3-like [Sesamum indicum]          |
| c40192.graph_c0 | 0.3642044     | 0.18228455    | 0.07800284    | 2.64701657     | 4.38168092     | 4.24788967     | 1.7E-07   | 3.10039  | up        | PREDICTED: endo-1,5;1,4-beta-D-glucanase-like [Sesamum indicum]                                  |
| c40195.graph_c0 | 1.9488645     | 1.43744336    | 2.10894151    | 22.2900327     | 20.9335345     | 22.7508136     | 1.219E-20 | 2.49341  | up        | PREDICTED: growth-regulating factor 6-like [Sesamum indicum]                                     |
| c40198.graph_c0 | 40.2043098    | 38.1351979    | 37.0556518    | 20.8773725     | 21.6159924     | 22.0017897     | 3.459E-85 | -1.92879 | down      | hypothetical protein MIMGU_mgv1a01294/mg [Erythranthe                                            |
| c40199.graph_c0 | 2.57280587    | 2.41834665    | 1.93531165    | 18.3569498     | 15.7716113     | 14.5883614     | 1.917E-19 | 1.7266   | up        | hypothetical protein MIMGU_mgv1a006503/mg [Erythranthe                                           |
| c40200.graph_c0 | 0.88965153    | 1.00186018    | 0.85742808    | 10.2916149     | 9.82752561     | 9.87079922     | 2.171E-23 | 2.35777  | up        | PREDICTED: patatin-like protein 2 [Sesamum indicum]                                              |
| c40209.graph_c0 | 0             | 0             | 0.04902479    | 3.82639476     | 5.50777286     | 4.68346031     | 2.941E-26 | 7.02903  | up        | PREDICTED: leucine-rich repeat receptor-like tyrosine-protein kinase At2g41820 [Sesamum indicum] |
| c40211.graph_c1 | 0.93400196    | 1.32180779    | 0.53803391    | 5.96899815     | 6.38279449     | 5.80658329     | 8.323E-10 | 1.61635  | up        | PREDICTED: histone deacetylase 15 isoform X8 [Sesamum indicum]                                   |
| c40212.graph_c0 | 5.23069748    | 5.28227094    | 4.40179069    | 21.901488      | 21.324183      | 22.2912528     | 3.412E-12 | 1.04702  | up        | PREDICTED: protein TIFY 7 [Sesamum indicum]                                                      |
| c40215.graph_c1 | 0.02279387    | 0             | 0.05858205    | 29.9355819     | 38.7111861     | 36.6069903     | 2.281E-98 | 9.22651  | up        | PREDICTED: subtilisin-like protease [Sesamum indicum]                                            |
| c40216.graph_c0 | 7.74045047    | 8.61715852    | 9.8538247     | 58.2024886     | 58.7227368     | 59.2050609     | 2.647E-40 | 1.65494  | up        | PREDICTED: ubiquitin-conjugating enzyme E2 56-like [Brassica rapa]                               |
| c40228.graph_c0 | 0.22705082    | 0.51137589    | 0.58353858    | 2.14524993     | 2.16045488     | 3.02972265     | 0.0009169 | 1.37446  | up        | PREDICTED: membrane protein of ER body-like protein [Sesamum indicum]                            |
| c40230.graph_c0 | 0.41668932    | 0.39724435    | 0.58645867    | 3.01405263     | 2.27869001     | 2.49474533     | 1.078E-06 | 1.37977  | up        | -                                                                                                |
| c40233.graph_c0 | 122.60205     | 137.885592    | 176.158814    | 80.0270849     | 50.0575287     | 71.3333084     | 1.042E-08 | -2.21058 | down      | PREDICTED: endoglucanase 6 [Sesamum indicum]                                                     |
| c40236.graph_c0 | 2.29268373    | 2.24201844    | 1.69972463    | 1.30741193     | 1.34249574     | 1.38061318     | 5.394E-17 | -1.71591 | down      | PREDICTED: uveal autoantigen with coiled-coil domains and ankyrin repeats [Sesamum indicum]      |
| c40242.graph_c0 | 49.9966987    | 46.8033141    | 44.3689949    | 48.1627654     | 43.7379604     | 48.0200755     | 2.146E-40 | -1.10166 | down      | hypothetical protein MIMGU_mgv1a007454/mg [Erythranthe                                           |
| c40244.graph_c0 | 0.21722552    | 0.54360759    | 0.1860956     | 3.2101912      | 3.23111661     | 2.87714454     | 2.243E-08 | 2.21206  | up        | PREDICTED: sulfhydryl oxidase 2-like [Sesamum indicum]                                           |
| c40250.graph_c0 | 1.19326248    | 0.75648966    | 1.58450252    | 8.93273983     | 9.39661345     | 9.78949108     | 2.042E-16 | 1.89625  | up        | PREDICTED: Werner Syndrome-like exonuclease isoform X2 [Sesamum indicum]                         |
| c40251.graph_c0 | 1.16045182    | 0.68181682    | 0.97253904    | 9.82755642     | 10.0156418     | 10.009046      | 8.838E-33 | 2.31738  | up        | PREDICTED: APO protein 2, chloroplastic [Sesamum indicum]                                        |

| #ID             | 0 h-1<br>FPKM | 0 h-2<br>FPKM | 0 h-3<br>FPKM | 28 h-1<br>FPKM | 28 h-2<br>FPKM | 28 h-3<br>FPKM | FDR       | log2FC   | regulated | nr_annotation                                                                                                  |
|-----------------|---------------|---------------|---------------|----------------|----------------|----------------|-----------|----------|-----------|----------------------------------------------------------------------------------------------------------------|
| c40255.graph_c0 | 43.0542947    | 46.2197702    | 43.8659895    | 30.81266       | 31.799482      | 27.565975      | 4.919E-77 | -1.65331 | down      | PREDICTED: DEAD-box ATP-dependent RNA helicase 37-like [Sesamum indicum]                                       |
| c40260.graph_c0 | 0.21187402    | 0.26510773    | 0.38571088    | 9.12383748     | 9.47772053     | 8.7433976      | 2.016E-76 | 3.88788  | up        | PREDICTED: proteoglycan 4-like [Sesamum indicum]                                                               |
| c40269.graph_c0 | 37.3000991    | 33.4931819    | 31.6462927    | 34.610838      | 36.3222216     | 35.9859795     | 5.327E-29 | -1.02689 | down      | PREDICTED: COP9 signalosome complex subunit 5b-like [Sesamum indicum]                                          |
| c40273.graph_c0 | 121.146377    | 122.925756    | 121.547661    | 90.9128669     | 93.3679064     | 94.3730873     | 1.567E-73 | -1.48233 | down      | hypothetical protein 29 [Hevea brasiliensis]                                                                   |
| c40274.graph_c0 | 4.19741006    | 4.15643449    | 5.16184507    | 3.90352429     | 5.00540571     | 3.39937799     | 5.539E-07 | -1.22992 | down      | -                                                                                                              |
| c40281.graph_c1 | 0.32566811    | 0.08149855    | 0.15693616    | 2.8994979      | 3.15225532     | 2.41425165     | 5.951E-10 | 2.82418  | up        | hypothetical protein MIMGU_mgv1a006915mg [Erythranthe outtata]                                                 |
| c40283.graph_c0 | 0.96493648    | 1.13243768    | 1.15446561    | 7.42421568     | 8.18815636     | 8.26822031     | 6.994E-15 | 1.78427  | up        | unnamed protein product [Coffea canephora]                                                                     |
| c40289.graph_c0 | 4.1767579     | 3.66213748    | 4.03526879    | 18.0698345     | 17.5057579     | 17.6287142     | 8.133E-26 | 1.07325  | up        | PREDICTED: RNA polymerase-associated protein CTR9 homolog [Sesamum indicum]                                    |
| c40295.graph_c0 | 5.10845251    | 5.73971902    | 6.49757838    | 49.0998043     | 44.2641053     | 44.2075666     | 4.326E-52 | 1.89392  | up        | hypothetical protein MIMGU_mgv1a011840mg [Erythranthe outtata]                                                 |
| c40300.graph_c0 | 4.67852065    | 4.52263843    | 3.53854102    | 48.2262789     | 51.4034481     | 47.9456903     | 3.11E-123 | 2.44675  | up        | PREDICTED: protein INVOLVED IN DE NOVO 2 [Sesamum indicum]                                                     |
| c40302.graph_c0 | 10.5792869    | 10.4204424    | 11.7459094    | 3.59843552     | 2.97135331     | 4.09073437     | 7.157E-59 | -2.7098  | down      | hypothetical protein MIMGU_mgv1a018285mg [Erythranthe outtata]                                                 |
| c40303.graph_c0 | 51.5860484    | 51.1423423    | 42.0865146    | 12.795386      | 12.3107711     | 12.1573696     | 3.7E-78   | -3.04643 | down      | PREDICTED: leucine-rich repeat receptor-like serine/threonine/tyrosine-protein kinase SOBIR1 [Sesamum indicum] |
| c40304.graph_c0 | 66.2415585    | 60.8887404    | 65.8932286    | 31.9970033     | 29.9963029     | 31.6219285     | 3.17E-115 | -2.13453 | down      | PREDICTED: probable serine/threonine-protein kinase Cx32, chloroplastic [Sesamum indicum]                      |
| c40310.graph_c0 | 77.7729053    | 81.0945657    | 76.5792865    | 81.0749086     | 71.1125553     | 77.1011072     | 3.265E-42 | -1.12828 | down      | hypothetical protein MIMGU_mgv1a008821mg [Erythranthe outtata]                                                 |
| c40310.graph_c1 | 40.0487648    | 37.2253771    | 41.3848449    | 40.2403845     | 38.6344029     | 40.2238858     | 6.856E-23 | -1.08574 | down      | protein phosphatase 2C, partial [Nicotiana attenuata]                                                          |
| c40312.graph_c0 | 2.45464406    | 2.11819139    | 2.0122353     | 15.9639134     | 14.8860492     | 15.2602412     | 4.993E-20 | 1.71953  | up        | hypothetical protein MIMGU_mgv1a010219mg [Erythranthe outtata]                                                 |
| c40316.graph_c0 | 63.1802962    | 64.4881269    | 57.2234473    | 34.5047012     | 37.4670021     | 36.8292504     | 4.75E-112 | -1.85415 | down      | PREDICTED: glucose-6-phosphate/phosphate translocator 2, chloroplastic-like [Solanum tuberosum]                |
| c40320.graph_c0 | 5.78919409    | 4.83416355    | 4.58695279    | 35.5570921     | 38.620148      | 39.0118656     | 9.665E-62 | 1.80786  | up        | PREDICTED: sugar transport protein 14-like [Sesamum indicum]                                                   |
| c40322.graph_c0 | 305.692846    | 299.893572    | 311.850951    | 1572.50451     | 1650.22933     | 1511.0752      | 8.387E-40 | 1.27609  | up        | RecName: Full=Catalase [Avicennia marina]                                                                      |
| c40323.graph_c0 | 14.7054921    | 13.3299746    | 13.7529182    | 11.1628832     | 13.3493627     | 11.143771      | 4.237E-15 | -1.3195  | down      | PREDICTED: RPA-interacting protein B [Sesamum indicum]                                                         |
| c40323.graph_c1 | 19.3780981    | 16.6860235    | 19.5464355    | 14.5382091     | 15.5878846     | 14.8288248     | 2.771E-09 | -1.39812 | down      | PREDICTED: RPA-interacting protein B [Sesamum indicum]                                                         |
| c40329.graph_c0 | 222.876342    | 228.095854    | 236.780308    | 71.2169905     | 76.5191209     | 73.1832981     | 7.56E-160 | -2.72977 | down      | PREDICTED: transmembrane 9 superfamily member 8 [Sesamum indicum]                                              |
| c40333.graph_c0 | 0.05491298    | 0.05496797    | 0.07056536    | 1.91570115     | 1.47745082     | 1.79116265     | 5.18E-10  | 3.75098  | up        | PREDICTED: transcription factor TCP5 [Sesamum indicum]                                                         |
| c40336.graph_c0 | 25.1821953    | 26.2332945    | 24.8031524    | 24.7222583     | 26.8855371     | 25.4118153     | 1.464E-35 | -1.0753  | down      | YSL transporter [Medicago truncatula]                                                                          |
| c40338.graph_c0 | 38.2156083    | 37.0261328    | 39.8177592    | 30.9652422     | 29.6531777     | 32.5030449     | 1.297E-43 | -1.39602 | down      | PREDICTED: vesicle transport v-SNARE 12 [Sesamum indicum]                                                      |
| c40343.graph_c0 | 1.77867698    | 2.07030007    | 2.28567034    | 16.955836      | 19.3269246     | 17.2947797     | 2.204E-30 | 2.03278  | up        | hypothetical protein MIMGU_mgv1a009694mg [Erythranthe outtata]                                                 |



| #ID             | 0 h-1<br>FPKM | 0 h-2<br>FPKM | 0 h-3<br>FPKM | 28 h-1<br>FPKM | 28 h-2<br>FPKM | 28 h-3<br>FPKM | FDR       | log2FC   | regulated | nr_annotation                                                                                       |
|-----------------|---------------|---------------|---------------|----------------|----------------|----------------|-----------|----------|-----------|-----------------------------------------------------------------------------------------------------|
| c40349.graph_c0 | 2.3494512     | 1.6518622     | 2.65971664    | 11.505753      | 10.7006418     | 10.8814875     | 6.288E-14 | 1.21911  | up        | hypothetical protein MIMGU_mgv1a009342mg [Erythranthe guttata]                                      |
| c40351.graph_c0 | 13.0413442    | 9.573229      | 12.1881045    | 1.26378318     | 0.8298747      | 1.40623194     | 2.004E-39 | -4.40245 | down      | PREDICTED: calcium-dependent protein kinase 11 [Sesamum indicum]                                    |
| c40354.graph_c0 | 4.79289792    | 5.48308261    | 5.5724861     | 1.07821089     | 1.19818258     | 0.81213349     | 3.884E-21 | -3.45312 | down      | PREDICTED: UDP-glucuronic acid decarboxylase 2-like [Sesamum indicum]                               |
| c40359.graph_c0 | 6.08160605    | 7.57249973    | 5.33714457    | 50.453553      | 54.5587202     | 46.0959746     | 4.154E-38 | 1.90321  | up        | chloroplast 1-deoxy-D-xylulose 5-phosphate reductoisomerase [Mitragnya speciosa]                    |
| c40360.graph_c0 | 5.91991072    | 4.12484845    | 5.70548974    | 2.8894623      | 2.55178405     | 2.77081898     | 1.334E-10 | -2.03037 | down      | PREDICTED: type I inositol 1,4,5-trisphosphate 5-phosphatase CVP2-like isoform X1 [Sesamum indicum] |
| c40362.graph_c0 | 5.28292275    | 6.78892184    | 5.32092384    | 0.51886457     | 0.60903187     | 0.93145635     | 3.116E-41 | -4.16564 | down      | PREDICTED: uncharacterized protein LOC105160931 [Sesamum indicum]                                   |
| c40362.graph_c1 | 0.44862987    | 0.79836286    | 0.6405635     | 3.15192887     | 3.36927946     | 2.95626232     | 0.0012136 | 1.23447  | up        | PREDICTED: protein SHI RELATED SEQUENCE 5-like [Sesamum indicum]                                    |
| c40365.graph_c1 | 2.85125968    | 2.9001489     | 2.48205204    | 0.80217256     | 0.3319647      | 0.76366063     | 2.101E-23 | -3.2037  | down      | -                                                                                                   |
| c40366.graph_c0 | 21.9938837    | 22.3515156    | 22.6621097    | 129.951454     | 122.240313     | 119.957857     | 2.98E-64  | 1.3824   | up        | PREDICTED: F-box/kelch-repeat protein At1g67480-like [Sesamum indicum]                              |
| c40367.graph_c0 | 21.1762944    | 22.6695478    | 23.0549303    | 21.4830039     | 20.1450379     | 19.841119      | 9.63E-35  | -1.21381 | down      | PREDICTED: probable protein phosphatase 2C 55 [Sesamum indicum]                                     |
| c40373.graph_c0 | 2.01848688    | 3.00612179    | 2.0877213     | 10.6269833     | 11.145904      | 10.9489035     | 4.476E-07 | 1.11213  | up        | PREDICTED: probable glycosyltransferase At5g03795 isoform X1 [Sesamum indicum]                      |
| c40374.graph_c1 | 3.08691282    | 3.09000389    | 3.21835138    | 1.9895636      | 2.1021578      | 2.00342817     | 1.044E-08 | -1.71553 | down      | Gibberellin 2-beta-dioxygenase 8 GN=GA2OX8 OS=Arabidopsis thaliana                                  |
| c40376.graph_c0 | 0.35852187    | 0.71776175    | 0.9214296     | 7.55657724     | 8.70505475     | 9.78071879     | 2.327E-07 | 2.60499  | up        | -                                                                                                   |
| c40376.graph_c1 | 316.99601     | 287.237436    | 317.935424    | 101.060508     | 94.7635867     | 114.442008     | 2.01E-101 | -2.66158 | down      | PREDICTED: protein SRG1 [Sesamum indicum]                                                           |
| c40377.graph_c0 | 9.57542268    | 4.56429096    | 7.03131271    | 0              | 0              | 0              | 5.062E-17 | -Inf     | down      | predicted protein [Hordeum vulgare subsp. vulgare]                                                  |
| c40382.graph_c0 | 0.11301803    | 0.1319864     | 0.14523265    | 1.23211283     | 1.27317426     | 1.36286743     | 9.987E-08 | 2.21617  | up        | PREDICTED: uncharacterized protein LOC105160401 [Sesamum indicum]                                   |
| c40383.graph_c0 | 7.55999292    | 8.86647319    | 8.2649066     | 6.10962189     | 6.77519516     | 6.26799929     | 1.576E-27 | -1.4579  | down      | PREDICTED: uncharacterized protein LOC105169210 [Sesamum indicum]                                   |
| c40384.graph_c0 | 18.2566152    | 16.8821998    | 16.2217399    | 16.2283869     | 16.5010022     | 17.0659758     | 2.394E-28 | -1.13366 | down      | PREDICTED: uncharacterized protein LOC105179476 isoform X3 [Sesamum indicum]                        |
| c40386.graph_c0 | 12.9190282    | 12.8332474    | 11.2788564    | 7.66926604     | 8.86611271     | 9.59179054     | 1.405E-15 | -1.59137 | down      | PREDICTED: uncharacterized protein LOC105178241 [Sesamum indicum]                                   |
| c40386.graph_c1 | 25.1870859    | 26.5214887    | 24.2341406    | 18.5511331     | 17.248279      | 16.989111      | 4.398E-58 | -1.61476 | down      | PREDICTED: uncharacterized protein LOC105178241 [Sesamum indicum]                                   |
| c40388.graph_c0 | 14.1305795    | 13.4018987    | 14.9001811    | 7.84297216     | 7.75106295     | 8.10519239     | 3.436E-62 | -1.93157 | down      | PREDICTED: uncharacterized protein LOC105162418 [Sesamum indicum]                                   |
| c40392.graph_c0 | 1.58224697    | 1.64359857    | 1.07416981    | 1.12827047     | 1.15585816     | 1.02688943     | 7.19E-07  | -1.46326 | down      | hypothetical protein [Lotus japonicus]                                                              |



| #ID             | 0 h-1<br>FPKM | 0 h-2<br>FPKM | 0 h-3<br>FPKM | 28 h-1<br>FPKM | 28 h-2<br>FPKM | 28 h-3<br>FPKM | FDR       | log2FC   | regulated | nr_annotation                                                                                 |
|-----------------|---------------|---------------|---------------|----------------|----------------|----------------|-----------|----------|-----------|-----------------------------------------------------------------------------------------------|
| c40483.graph_c0 | 2.18100831    | 1.09159613    | 1.33461049    | 0              | 0              | 0              | 1.179E-14 | -Inf     | down      | -                                                                                             |
| c40490.graph_c0 | 1.36277783    | 0.62006475    | 0.63680853    | 7.65354739     | 5.52834857     | 4.92271242     | 0.0002832 | 1.706    | up        | -                                                                                             |
| c40492.graph_c0 | 7.27085128    | 7.62470965    | 8.2628104     | 4.99682571     | 5.25819964     | 5.07471103     | 4.242E-20 | -1.68743 | down      | PREDICTED: zinc finger CCCH domain-containing protein 32 [Sesamum indicum]                    |
| c40493.graph_c0 | 1.35554618    | 1.61536137    | 1.74193051    | 14.965705      | 17.1555314     | 19.370589      | 5.29E-21  | 2.35713  | up        | PREDICTED: clp protease-related protein At4g12060, chloroplastic isoform X1 [Sesamum indicum] |
| c40496.graph_c0 | 0.03726599    | 0.03730331    | 0.04788828    | 0.94796482     | 1.46729718     | 1.3923568      | 2.136E-10 | 3.86484  | up        | PREDICTED: uncharacterized protein LOC105173890 [Sesamum indicum]                             |
| c40498.graph_c0 | 19.9657721    | 20.5087568    | 21.2447959    | 21.5630868     | 20.0816924     | 22.0881914     | 3.764E-25 | -1.04464 | down      | hypothetical protein M569_11555, partial [Genlisea aurea]                                     |
| c40499.graph_c0 | 1114.41988    | 1191.90246    | 1168.8041     | 214.990573     | 237.905045     | 255.426993     | 3.75E-176 | -3.38507 | down      | PREDICTED: legumin B-like [Sesamum indicum]                                                   |
| c40500.graph_c0 | 6.92641418    | 6.08928995    | 6.03700768    | 0.74416804     | 0.98810877     | 0.67867446     | 3.211E-50 | -4.07278 | down      | hypothetical protein M569_14517 [Genlisea aurea]                                              |
| c40504.graph_c0 | 1.34690873    | 0.70783517    | 1.29812329    | 8.3208668      | 7.62344731     | 7.60852446     | 6.116E-14 | 1.72064  | up        | PREDICTED: isochorismate synthase, chloroplastic-like [Sesamum indicum]                       |
| c40512.graph_c0 | 1.30129141    | 1.6673209     | 1.5384341     | 0.68095519     | 0.85394262     | 0.71000217     | 3.464E-08 | -2.09805 | down      | hypothetical protein MIMGU_mgv1a023619mg [Erythranthe guttata]                                |
| c40514.graph_c0 | 1.82619674    | 1.76605844    | 1.35235583    | 1.0573162      | 1.66557247     | 1.28496376     | 1.102E-06 | -1.39052 | down      | PREDICTED: rho guanine nucleotide exchange factor 8-like [Sesamum indicum]                    |
| c40517.graph_c0 | 59.4167606    | 58.8321103    | 63.6733485    | 42.560167      | 44.5509578     | 39.2447582     | 9.993E-54 | -1.61788 | down      | hypothetical protein MIMGU_mgv1a015340mg [Erythranthe guttata]                                |
| c40522.graph_c0 | 1.59900543    | 1.65988832    | 1.90257897    | 12.181032      | 10.687423      | 12.7845323     | 5.813E-12 | 1.69602  | up        | PREDICTED: branched-chain-amino-acid aminotransferase-like protein 1 [Sesamum indicum]        |
| c40522.graph_c1 | 1.08163354    | 1.79208271    | 1.62958709    | 12.849078      | 13.0211071     | 13.5815022     | 2.818E-25 | 2.03722  | up        | hypothetical protein MIMGU_mgv1a0045111mg, partial [Erythranthe guttata]                      |
| c40525.graph_c0 | 25.8431431    | 24.2547942    | 27.5240022    | 16.4085208     | 16.8775666     | 15.9150241     | 1.935E-41 | -1.74961 | down      | PREDICTED: U-box domain-containing protein 4 [Sesamum indicum]                                |
| c40526.graph_c0 | 0.25772169    | 0             | 0.11039419    | 1.34239293     | 1.09930565     | 1.42654356     | 4.506E-06 | 2.31374  | up        | PREDICTED: SNARE-interacting protein KEULE-like isoform X1 [Sesamum indicum]                  |
| c40528.graph_c0 | 1.38491192    | 1.27450042    | 1.34910214    | 14.4812748     | 13.6175917     | 12.161032      | 1.923E-46 | 2.23715  | up        | PREDICTED: magnesium-chelatase subunit ChlH, chloroplastic [Sesamum indicum]                  |
| c40528.graph_c1 | 0.85256645    | 0.85342017    | 0.76214375    | 6.92380778     | 9.34083624     | 7.05671737     | 3.741E-13 | 2.15014  | up        | PREDICTED: magnesium-chelatase subunit ChlH, chloroplastic [Sesamum indicum]                  |
| c40537.graph_c2 | 2.44661951    | 2.72737278    | 2.88200269    | 21.3652098     | 18.9258863     | 18.9617707     | 2.015E-50 | 1.78616  | up        | PREDICTED: transcription factor bHLH143-like [Sesamum indicum]                                |
| c40538.graph_c0 | 2.03557613    | 2.51147827    | 2.61579591    | 18.6134824     | 16.681969      | 17.6028797     | 2.838E-22 | 1.79149  | up        | PREDICTED: DNA-repair protein XRCC1 [Sesamum indicum]                                         |
| c40553.graph_c0 | 0.47623041    | 0.39725607    | 0.4419819     | 4.0188554      | 4.21895626     | 4.33062909     | 2.257E-13 | 2.16632  | up        | PREDICTED: uncharacterized protein LOC105177782 [Sesamum indicum]                             |
| c40558.graph_c0 | 74.463538     | 64.9781049    | 76.5125234    | 45.1901054     | 51.0193562     | 47.3176882     | 3.048E-27 | -1.68091 | down      | unnamed protein product [Coffea canephora]                                                    |
| c40560.graph_c1 | 1.6603941     | 1.42796424    | 1.3222757     | 7.17260242     | 6.75242298     | 5.86665416     | 3.594E-08 | 1.07716  | up        | PREDICTED: formin-like protein 14 [Sesamum indicum]                                           |

| #ID             | 0 h-1<br>FPKM | 0 h-2<br>FPKM | 0 h-3<br>FPKM | 28 h-1<br>FPKM | 28 h-2<br>FPKM | 28 h-3<br>FPKM | FDR       | log2FC   | regulated | nr_annotation                                                                                                                        |
|-----------------|---------------|---------------|---------------|----------------|----------------|----------------|-----------|----------|-----------|--------------------------------------------------------------------------------------------------------------------------------------|
| c40564.graph_c0 | 2.72879673    | 2.91671763    | 3.80378233    | 1.78158488     | 1.69965717     | 1.23432344     | 4.098E-09 | -2.09921 | down      | hypothetical protein MIMGU_mgv1a001712mg [Erythranthe<br>outfata]                                                                    |
| c40566.graph_c0 | 37.5048816    | 34.4490528    | 32.6115227    | 3.09676429     | 3.34916011     | 4.6373411      | 0         | -4.3251  | down      | hypothetical protein F775_27779 [Aegilops tauschii]                                                                                  |
| c40570.graph_c0 | 0.92824794    | 0.25341203    | 0.27109894    | 23.7965781     | 23.9503327     | 23.2463256     | 5.463E-92 | 4.53426  | up        | PREDICTED: transmembrane emp24 domain-containing protein<br>p24delta3-like [Sesamum indicum]                                         |
| c40576.graph_c0 | 67.6700635    | 69.7781208    | 69.1478905    | 443.639849     | 463.764805     | 453.936017     | 4.669E-94 | 1.62936  | up        | PREDICTED: 40S ribosomal protein SA-like [Sesamum indicum]                                                                           |
| c40579.graph_c0 | 68.5207675    | 69.2775685    | 58.8975914    | 24.816971      | 24.5127911     | 24.4636257     | 3.845E-67 | -2.50298 | down      | -                                                                                                                                    |
| c40586.graph_c0 | 0.49447727    | 0.44547517    | 0.38125372    | 8.26581423     | 7.52815313     | 7.4193206      | 1.67E-19  | 3.04738  | up        | PREDICTED: uncharacterized protein LOC105171062 [Sesamum<br>indicum]                                                                 |
| c40588.graph_c0 | 0.20644942    | 0.28046191    | 0.32214475    | 6.01256741     | 6.18358892     | 5.52713393     | 8.585E-52 | 3.3573   | up        | PREDICTED: protein phosphatase 2C and cyclic nucleotide-<br>binding/kinase domain-containing protein isoform X1 [Sesamum<br>indicum] |
| c40590.graph_c0 | 4.55473685    | 3.98938551    | 4.04833688    | 29.9311399     | 28.9927329     | 30.3437481     | 5.256E-41 | 1.73642  | up        | PREDICTED: urease accessory protein G isoform X1 [Sesamum<br>indicum]                                                                |
| c40591.graph_c0 | 50.1982016    | 51.0302069    | 60.5481856    | 6.96880878     | 4.92555341     | 8.33675612     | 1.105E-50 | -4.09045 | down      | PREDICTED: cytokinin hydroxylase [Sesamum indicum]                                                                                   |
| c40592.graph_c0 | 2.85022471    | 4.10564995    | 3.9306505     | 0.30315028     | 0.36495504     | 0.41228025     | 2.245E-23 | -4.42555 | down      | -                                                                                                                                    |
| c40593.graph_c0 | 0.24220263    | 0.09697806    | 0.18674398    | 1.83072737     | 2.16158291     | 1.66622688     | 1.859E-06 | 2.33774  | up        | Phototropic-responsive NPH3 family protein [Theobroma cacao]                                                                         |
| c40601.graph_c0 | 4.71563378    | 4.77461274    | 4.66672413    | 21.3122625     | 21.1992847     | 21.0552016     | 4.724E-11 | 1.07635  | up        | PREDICTED: probable sphingolipid transporter spinster homolog 2<br>[Populus euphratica]                                              |
| c40608.graph_c0 | 88.1698792    | 88.6187733    | 90.1553533    | 57.4703106     | 51.0037935     | 52.1296319     | 1.558E-90 | -1.82394 | down      | cellular nucleic acid binding protein, putative [Ricinus communis]                                                                   |
| c40610.graph_c0 | 1.36968901    | 0.82263633    | 1.12646695    | 8.16295307     | 6.9748974      | 8.77289669     | 1.312E-09 | 1.76072  | up        | PREDICTED: vesicle transport protein SFT2B [Sesamum indicum]                                                                         |
| c40618.graph_c0 | 5.17681386    | 4.4309835     | 5.88111676    | 2.97181271     | 2.17861688     | 3.05902797     | 3.607E-13 | -2.00757 | down      | PREDICTED: uncharacterized protein LOC105170597 [Sesamum<br>indicum]                                                                 |
| c40622.graph_c0 | 12.2280945    | 11.4572871    | 13.0682008    | 57.3336138     | 57.0084092     | 57.063491      | 1.235E-31 | 1.1298   | up        | PREDICTED: NADH dehydrogenase [ubiquinone] 1 alpha<br>subcomplex subunit 9, mitochondrial [Sesamum indicum]                          |
| c40624.graph_c0 | 37.5408725    | 34.771925     | 36.0290599    | 8.41558463     | 9.22331692     | 8.57301317     | 1.77E-228 | -3.13773 | down      | hypothetical protein MIMGU_mgv1a008212mg [Erythranthe<br>outfata]                                                                    |
| c40628.graph_c0 | 3.25749988    | 3.03382231    | 2.83667772    | 13.2252253     | 13.0452044     | 12.6315681     | 1.61E-21  | 1.00239  | up        | PREDICTED: uncharacterized protein LOC105164793 [Sesamum<br>indicum]                                                                 |
| c40632.graph_c1 | 61.9054208    | 61.6134941    | 67.3663266    | 13.6893078     | 12.8031024     | 17.460841      | 1.42E-103 | -3.20894 | down      | PREDICTED: cytochrome P450 71A1-like [Vitis vinifera]                                                                                |
| c40645.graph_c0 | 0.52365902    | 0.10483668    | 0             | 4.11039747     | 4.19239844     | 3.10560257     | 3.367E-08 | 3.11799  | up        | PREDICTED: auxin response factor 17-like isoform X3 [Zea mays]                                                                       |
| c40646.graph_c0 | 389.052741    | 403.702315    | 394.744712    | 46.7227809     | 45.2038231     | 49.7822644     | 0         | -4.15714 | down      | PREDICTED: transcription factor PIF3 isoform X2 [Sesamum<br>indicum]                                                                 |
| c40646.graph_c1 | 308.731804    | 313.052762    | 320.830782    | 30.1789745     | 30.1806157     | 34.7176976     | 0         | -4.39983 | down      | unnamed protein product [Vitis vinifera]                                                                                             |
| c40647.graph_c0 | 35.1366365    | 36.1097357    | 32.0168507    | 19.0367509     | 17.9150653     | 17.6302693     | 3.53E-100 | -2.00925 | down      | PREDICTED: protein FAM63A-like [Sesamum indicum]                                                                                     |
| c40647.graph_c1 | 17.5658582    | 15.8073419    | 13.680499     | 7.09264695     | 7.45192168     | 8.10255879     | 5.355E-18 | -2.14206 | down      | -                                                                                                                                    |
| c40651.graph_c0 | 203.782242    | 200.262068    | 196.890152    | 140.733099     | 153.148414     | 131.485925     | 1.351E-75 | -1.58924 | down      | PREDICTED: type I inositol 1,4,5-trisphosphate 5-phosphatase<br>CVP2 [Sesamum indicum]                                               |

| #ID             | 0 h-1<br>FPKM | 0 h-2<br>FPKM | 0 h-3<br>FPKM | 28 h-1<br>FPKM | 28 h-2<br>FPKM | 28 h-3<br>FPKM | FDR       | log2FC   | regulated | nr_annotation                                                                               |
|-----------------|---------------|---------------|---------------|----------------|----------------|----------------|-----------|----------|-----------|---------------------------------------------------------------------------------------------|
| c40652.graph_c0 | 49.848473     | 49.6224529    | 49.3565627    | 23.5742724     | 20.7728207     | 23.1872353     | 2.61E-158 | -2.23005 | down      | PREDICTED: uncharacterized protein LOC105173727 [Sesamum indicum]                           |
| c40653.graph_c1 | 0.76706531    | 0.92948255    | 0.5706738     | 4.13722681     | 4.07993828     | 4.28577198     | 2.964E-05 | 1.37706  | up        | PREDICTED: protein ROOT PRIMORDIUM DEFECTIVE 1 [Sesamum indicum]                            |
| c40656.graph_c0 | 11.4675273    | 10.3231377    | 10.5404954    | 9.49210675     | 9.04081378     | 8.92619525     | 3.409E-23 | -1.32549 | down      | PREDICTED: putative GTP diphosphokinase RSH1, chloroplastic [Sesamum indicum]               |
| c40658.graph_c0 | 17.5678315    | 16.7950669    | 14.9149563    | 9.46855182     | 8.78237492     | 9.99731342     | 3.529E-59 | -1.89079 | down      | PREDICTED: protein DOS2-like [Sesamum indicum]                                              |
| c40661.graph_c0 | 0.59885284    | 1.02763286    | 0.9344531     | 5.96904401     | 4.5894851      | 5.47952757     | 4.132E-10 | 1.55284  | up        | unnamed protein product [Coffea canephora]                                                  |
| c40662.graph_c0 | 2.06203679    | 2.06410161    | 1.71878849    | 8.9110492      | 10.2401625     | 9.40316905     | 2.9E-11   | 1.20006  | up        | PREDICTED: pentatricopeptide repeat-containing protein At2g40720 [Sesamum indicum]          |
| c40668.graph_c0 | 3.17720903    | 3.92001622    | 2.94344235    | 0              | 0.04848769     | 0.21910113     | 1.601E-37 | -6.30868 | down      | hypothetical protein MIMGU_mgv1a010491mg [Erythranthe diffusa]                              |
| c40670.graph_c0 | 5.85216245    | 7.04385702    | 5.96749411    | 27.6723965     | 28.8725707     | 25.7841474     | 8.829E-24 | 1.03509  | up        | PREDICTED: probable methyltransferase PM19 [Sesamum indicum]                                |
| c40673.graph_c0 | 0.13113713    | 0.06563422    | 0             | 1.62026503     | 1.63505887     | 1.90541261     | 9.699E-10 | 3.64723  | up        | PREDICTED: GDSL esterase/lipase At4g10955-like [Sesamum indicum]                            |
| c40682.graph_c0 | 149.821317    | 165.358277    | 144.258667    | 61.0733252     | 61.0344248     | 62.2901166     | 5.5E-106  | -2.40672 | down      | PREDICTED: splicing factor 3B subunit 1-like [Sesamum indicum]                              |
| c40685.graph_c0 | 8.03374693    | 8.59009548    | 5.27915602    | 40.7394649     | 42.7148745     | 42.5554618     | 1.218E-18 | 1.43912  | up        | PREDICTED: uncharacterized protein LOC105159330 [Sesamum indicum]                           |
| c40689.graph_c0 | 97.5574953    | 99.0684287    | 91.0304068    | 8.38845213     | 8.26884686     | 8.56136865     | 0         | -4.60123 | down      | PREDICTED: zinc finger AN1 domain-containing stress-associated protein 12 [Sesamum indicum] |
| c40691.graph_c1 | 11.2227473    | 9.58998731    | 10.6403818    | 45.5577516     | 58.0641388     | 48.4976312     | 2.398E-11 | 1.18313  | up        | PREDICTED: thaumatin-like protein 1b [Sesamum indicum]                                      |
| c40696.graph_c0 | 0.25298123    | 0.11510662    | 0             | 0.93604153     | 0.78478933     | 0.90019551     | 0.0025658 | 1.76633  | up        | PREDICTED: pentatricopeptide repeat-containing protein At2g27610 [Sesamum indicum]          |
| c40701.graph_c1 | 161.828015    | 154.559325    | 174.613496    | 126.813224     | 140.481105     | 142.932899     | 1.585E-25 | -1.35079 | down      | PREDICTED: glutathione S-transferase F9-like [Sesamum indicum]                              |
| c40702.graph_c0 | 8.19098373    | 9.28437211    | 9.44220649    | 40.5340143     | 42.6454527     | 37.4688126     | 1.468E-17 | 1.07159  | up        | PREDICTED: 60S ribosome subunit biogenesis protein NIP7 homolog [Sesamum indicum]           |
| c40705.graph_c0 | 0.34490636    | 0.34525174    | 0.531862      | 2.05554285     | 2.12756673     | 1.84094581     | 0.0062997 | 1.20415  | up        | PREDICTED: putative transcription factor bHLH041 [Sesamum indicum]                          |
| c40707.graph_c0 | 57.3609618    | 56.7819892    | 55.1017757    | 17.9696622     | 16.7812032     | 16.2969857     | 1.53E-173 | -2.81947 | down      | PREDICTED: uncharacterized protein LOC104230730, partial [Nicotiana glauca]                 |
| c40708.graph_c0 | 5.82118911    | 5.82701815    | 6.10247928    | 3.34011055     | 4.82529066     | 5.81440625     | 2.312E-05 | -1.43422 | down      | PREDICTED: nuclear transcription factor Y subunit B-3-like [Sesamum indicum]                |
| c40708.graph_c1 | 5.65590466    | 4.83185561    | 5.45104606    | 4.85485354     | 4.67144324     | 4.82900716     | 2.573E-09 | -1.24135 | down      | PREDICTED: nuclear transcription factor Y subunit B-3-like [Solanum tuberosum]              |
| c40710.graph_c0 | 2.66927956    | 3.02185097    | 3.47096479    | 15.0120363     | 16.890944      | 14.6619474     | 2.259E-17 | 1.25126  | up        | PREDICTED: probable tRNA modification GTPase MnmE [Sesamum indicum]                         |
| c40711.graph_c1 | 5.62647142    | 6.16011537    | 7.23023854    | 3.32254569     | 2.76918207     | 3.64965213     | 1.259E-08 | -2.05772 | down      | -                                                                                           |

| #ID             | 0 h-1<br>FPKM | 0 h-2<br>FPKM | 0 h-3<br>FPKM | 28 h-1<br>FPKM | 28 h-2<br>FPKM | 28 h-3<br>FPKM | FDR       | log2FC   | regulated | nr_annotation                                                                  |
|-----------------|---------------|---------------|---------------|----------------|----------------|----------------|-----------|----------|-----------|--------------------------------------------------------------------------------|
| c40712.graph_c0 | 7.75888091    | 6.39354082    | 5.3432901     | 37.6356066     | 39.0448813     | 34.599986      | 9.095E-32 | 1.42627  | up        | PREDICTED: uncharacterized protein LOC105166784 [Sesamum indicum]              |
| c40713.graph_c0 | 8.09539644    | 8.96080028    | 7.02261593    | 5.51317819     | 5.31241814     | 5.10337349     | 3.722E-26 | -1.6848  | down      | PREDICTED: protein tipD-like [Sesamum indicum]                                 |
| c40715.graph_c1 | 84.0139855    | 94.3883788    | 88.1125125    | 77.8621041     | 82.801106      | 75.6042946     | 2.385E-38 | -1.26496 | down      | PREDICTED: nematode resistance protein-like HSPRO2 [Sesamum indicum]           |
| c40715.graph_c2 | 405.898417    | 380.961208    | 396.335706    | 100.621086     | 96.8175419     | 92.9578975     | 0         | -3.11725 | down      | PREDICTED: uncharacterized protein LOC105174779 [Sesamum indicum]              |
| c40718.graph_c0 | 6.9313805     | 6.05257809    | 7.51733833    | 34.0490503     | 32.4528422     | 32.2443066     | 1.606E-20 | 1.17583  | up        | PREDICTED: uncharacterized protein DDB_G0290685 [Sesamum indicum]              |
| c40719.graph_c0 | 1.80873568    | 2.20660398    | 2.28797982    | 9.65393711     | 9.56971411     | 9.11782641     | 6.916E-10 | 1.07545  | up        | PREDICTED: CBL-interacting serine/threonine-protein kinase 8 [Sesamum indicum] |
| c40728.graph_c0 | 0.73221957    | 0.99681578    | 0.63983318    | 24.4586696     | 24.3326361     | 23.2583655     | 2.12E-115 | 3.83851  | up        | PREDICTED: shaggy-related protein kinase kappa isoform X1 [Sesamum indicum]    |
| c40735.graph_c0 | 3.24786543    | 2.75388792    | 2.74968938    | 17.1068989     | 15.2202548     | 14.8202025     | 1.113E-15 | 1.34052  | up        | -                                                                              |
| c40736.graph_c0 | 131.097979    | 129.870194    | 126.182798    | 44.5497191     | 45.6747976     | 48.5011856     | 4.34E-211 | -2.5704  | down      | hypothetical protein MIMGU_mgv1a0084/0mg [Erythranthe outtata]                 |
| c40740.graph_c0 | 31.4146665    | 26.4433311    | 26.2136949    | 3.03932448     | 2.54342809     | 2.54055332     | 1.61E-128 | -4.46035 | down      | -                                                                              |
| c40743.graph_c0 | 0.3403906     | 0.2433796     | 0.06248791    | 2.36791327     | 2.80812422     | 2.68200603     | 1.507E-07 | 2.52949  | up        | PREDICTED: protein N-terminal asparagine amidohydrolase [Sesamum indicum]      |
| c40748.graph_c0 | 83.5682079    | 89.8793576    | 79.3639643    | 33.771948      | 34.3379181     | 32.5754308     | 2.88E-159 | -2.4181  | down      | PREDICTED: uncharacterized protein LOC105170953 [Sesamum indicum]              |
| c40751.graph_c0 | 0.62681183    | 0.75292738    | 0.72493022    | 9.20237715     | 8.02095215     | 8.81014016     | 1.589E-14 | 2.53704  | up        | PREDICTED: 15-cis-zeta-carotene isomerase, chloroplastic [Sesamum indicum]     |
| c40754.graph_c0 | 0.94341927    | 0.80945482    | 1.15460106    | 0.91422892     | 0.85494382     | 0.6660744      | 0.000699  | -1.3508  | down      | hypothetical chloroplast RF21 (chloroplast) [Penthorum chinense]               |
| c40759.graph_c0 | 328.124177    | 320.817172    | 313.354095    | 79.0458284     | 70.0388213     | 79.7868447     | 0         | -3.16151 | down      | hypothetical protein MIMGU_mgv1a008881mg [Erythranthe outtata]                 |
| c40760.graph_c0 | 1.23405132    | 1.38969791    | 0.5451204     | 9.58563354     | 10.3251777     | 8.96533651     | 5.427E-18 | 2.10592  | up        | PREDICTED: UDP-glycosyltransferase 86A1-like [Sesamum indicum]                 |
| c40767.graph_c0 | 0.25073821    | 0.37648394    | 0.08055213    | 3.50802546     | 3.78444757     | 2.78816895     | 2.752E-08 | 2.75158  | up        | conserved hypothetical protein [Ricinus communis]                              |
| c40770.graph_c0 | 34.2059952    | 37.4502706    | 32.7094886    | 15.5865062     | 18.6765218     | 16.9183277     | 3.492E-83 | -2.11788 | down      | PREDICTED: O-glucosyltransferase rumi homolog isoform X1 [Sesamum indicum]     |
| c40770.graph_c1 | 21.0263151    | 24.5373673    | 18.8172544    | 13.1376739     | 15.2763979     | 13.5832053     | 2.665E-19 | -1.70538 | down      | PREDICTED: O-glucosyltransferase rumi homolog isoform X1 [Sesamum indicum]     |
| c40774.graph_c0 | 27.3662502    | 23.9728404    | 28.9977274    | 5.57855909     | 5.25049529     | 5.30805427     | 3.931E-56 | -3.40746 | down      | PREDICTED: uncharacterized protein LOC105165423 [Sesamum indicum]              |
| c40777.graph_c0 | 16.3683458    | 19.1213732    | 17.0703973    | 2.13982705     | 2.36907749     | 2.1202417      | 1.12E-119 | -4.07808 | down      | PREDICTED: formin-like protein 6 [Sesamum indicum]                             |
| c40778.graph_c0 | 53.9724016    | 58.0442363    | 53.7002087    | 39.1233841     | 39.0047981     | 40.3486119     | 3.973E-82 | -1.57422 | down      | hypothetical protein MIMGU_mgv1a004204mg [Erythranthe outtata]                 |
| c40780.graph_c0 | 0.32711161    | 0.28066214    | 0.18015059    | 2.88687729     | 2.2999231      | 2.93765693     | 4.267E-07 | 2.28339  | up        | hypothetical protein MIMGU_mgv1a009114mg [Erythranthe outtata]                 |

| #ID             | 0 h-1<br>FPKM | 0 h-2<br>FPKM | 0 h-3<br>FPKM | 28 h-1<br>FPKM | 28 h-2<br>FPKM | 28 h-3<br>FPKM | FDR       | log2FC   | regulated | nr_annotation                                                                                        |
|-----------------|---------------|---------------|---------------|----------------|----------------|----------------|-----------|----------|-----------|------------------------------------------------------------------------------------------------------|
| c40785.graph_c0 | 3.5182278     | 3.71923212    | 3.78867814    | 27.6891846     | 28.7335865     | 28.2621857     | 6.609E-96 | 1.84978  | up        | PREDICTED: alpha-mannosidase-like [Sesamum indicum]                                                  |
| c40788.graph_c0 | 2.49911446    | 2.15192855    | 2.4862924     | 30.6043859     | 27.9150392     | 29.5149103     | 9.174E-92 | 2.53383  | up        | PREDICTED: phosphoribosylaminoimidazole carboxylase, chloroplastic-like isoform X1 [Sesamum indicum] |
| c40792.graph_c0 | 15.4836094    | 15.1335687    | 15.2669197    | 14.1198296     | 14.1707501     | 15.7953662     | 3.574E-32 | -1.14757 | down      | unnamed protein product [Vitis vinifera]                                                             |
| c40796.graph_c0 | 126.990996    | 124.539503    | 135.663433    | 106.165043     | 111.415855     | 107.90532      | 2.648E-40 | -1.34205 | down      | PREDICTED: 2-alkenal reductase (NADP(+)-dependent)-like [Sesamum indicum]                            |
| c40799.graph_c0 | 0.15345267    | 0.05120211    | 0.19719276    | 3.234327       | 3.86015877     | 2.82119713     | 2.712E-12 | 3.5266   | up        | hypothetical protein MIMGU_mgv1a026254mg [Erythranthe outtata]                                       |
| c40806.graph_c1 | 5.57899117    | 5.58457769    | 5.29230309    | 35.1878214     | 40.3819239     | 35.9835205     | 3.608E-53 | 1.67085  | up        | PREDICTED: phenylalanine ammonia-lyase [Sesamum indicum]                                             |
| c40807.graph_c0 | 9.53061026    | 10.0157626    | 9.44579657    | 8.32840167     | 10.1241726     | 10.4756432     | 3.886E-20 | -1.09302 | down      | PREDICTED: probable protein phosphatase 2C 38 isoform X2 [Sesamum indicum]                           |
| c40809.graph_c0 | 3.27471402    | 2.99295026    | 3.75073095    | 1.65568228     | 1.63507516     | 1.98431535     | 8.248E-10 | -2.01716 | down      | PREDICTED: protein tesmin/TSO1-like CXC 2 isoform X4 [Sesamum indicum]                               |
| c40809.graph_c1 | 0.23852944    | 0.28652195    | 0.2758678     | 1.69894587     | 1.69051831     | 1.57022634     | 5.98E-05  | 1.53827  | up        | PREDICTED: LOW QUALITY PROTEIN: protein tesmin/TSO1-like CXC 2 [Sesamum indicum]                     |
| c40812.graph_c0 | 8.49866481    | 8.50717493    | 8.41936622    | 2.122418       | 1.99005002     | 2.30916768     | 5.052E-71 | -3.07504 | down      | hypothetical protein MIMGU_mgv1a008008mg [Erythranthe outtata]                                       |
| c40815.graph_c0 | 0.24014702    | 0.32051666    | 0.30859843    | 4.33434725     | 4.88532018     | 4.08273971     | 6.846E-14 | 2.84218  | up        | PREDICTED: myosin-11 [Sesamum indicum]                                                               |
| c40816.graph_c0 | 4.2552552     | 3.62058876    | 2.05056427    | 0              | 0              | 0.25236138     | 5.75E-14  | -6.36553 | down      | PREDICTED: uncharacterized protein LOC105168692 [Sesamum indicum]                                    |
| c40818.graph_c0 | 1.01271476    | 0.84477403    | 1.44597617    | 5.19313759     | 6.49802579     | 5.87252113     | 1.809E-05 | 1.31411  | up        | PREDICTED: protein SAWADEE HOMEODOMAIN HOMOLOG 1-like isoform X1 [Sesamum indicum]                   |
| c40827.graph_c0 | 16.3515963    | 18.5999658    | 17.1920034    | 18.0514493     | 18.6561938     | 15.2808266     | 1.497E-17 | -1.096   | down      | PREDICTED: random slug protein 5 [Sesamum indicum]                                                   |
| c40830.graph_c0 | 0.30639798    | 0.40004973    | 0.23966389    | 1.94610198     | 2.25544322     | 1.95142697     | 1.21E-08  | 1.61388  | up        | PREDICTED: auxilin-like protein 1 [Sesamum indicum]                                                  |
| c40838.graph_c0 | 0.15097515    | 0.22668949    | 0.19400904    | 8.50390981     | 6.68749346     | 6.55858852     | 2.155E-29 | 4.15682  | up        | PREDICTED: indole-3-acetic acid-amido synthetase GH3.6 [Sesamum indicum]                             |
| c40843.graph_c0 | 2.92246105    | 3.05257821    | 3.18399235    | 0.32322163     | 0.2084563      | 0.3767803      | 6.27E-29  | -4.42317 | down      | -                                                                                                    |
| c40848.graph_c0 | 313.954084    | 307.037415    | 302.055882    | 171.135014     | 173.278996     | 177.898205     | 4.36E-115 | -1.91144 | down      | Histone [Morus notabilis]                                                                            |
| c40850.graph_c0 | 22.2386991    | 21.9184914    | 21.103465     | 4.66239183     | 4.93938448     | 4.66682102     | 1.67E-87  | -3.28345 | down      | unnamed protein product [Coffea canephora]                                                           |
| c40855.graph_c0 | 0.6828788     | 0.54685008    | 0.96527892    | 7.54394811     | 5.51191956     | 7.97824086     | 2.922E-09 | 2.16543  | up        | PREDICTED: transcription factor BEE 1-like [Sesamum indicum]                                         |
| c40857.graph_c0 | 35.6586579    | 31.5272806    | 30.4781365    | 23.9259919     | 24.8379748     | 22.3171138     | 5.139E-54 | -1.54761 | down      | PREDICTED: vacuolar protein sorting-associated protein 32 homolog 2 [Sesamum indicum]                |
| c40858.graph_c0 | 0.66286219    | 0.60320541    | 0.77436742    | 8.10240164     | 8.0670521      | 6.9331338      | 6.809E-13 | 2.40739  | up        | PREDICTED: GATA transcription factor 5-like [Sesamum indicum]                                        |
| c40862.graph_c0 | 1.06726148    | 0.62319261    | 0.57144719    | 4.13695729     | 5.01928862     | 3.63945175     | 0.0011416 | 1.41534  | up        | -                                                                                                    |
| c40879.graph_c0 | 221.066044    | 222.780212    | 215.274793    | 99.6714079     | 96.191978      | 100.14984      | 1.73E-142 | -2.24492 | down      | PREDICTED: triacylglycerol lipase SDP1-like [Sesamum indicum]                                        |

| #ID             | 0 h-1<br>FPKM | 0 h-2<br>FPKM | 0 h-3<br>FPKM | 28 h-1<br>FPKM | 28 h-2<br>FPKM | 28 h-3<br>FPKM | FDR       | log2FC   | regulated | nr_annotation                                                                                          |
|-----------------|---------------|---------------|---------------|----------------|----------------|----------------|-----------|----------|-----------|--------------------------------------------------------------------------------------------------------|
| c40880.graph_c0 | 1.14507785    | 0.86741311    | 0.87492833    | 8.9858993      | 8.80392877     | 9.01181086     | 1.746E-41 | 2.12691  | up        | PREDICTED: chlorophyllide a oxygenase, chloroplastic-like [Sesamum indicum]                            |
| c40884.graph_c0 | 3.15467743    | 2.7187789     | 2.68813791    | 44.850628      | 42.9646348     | 42.6806958     | 1.34E-184 | 2.84108  | up        | PREDICTED: bifunctional aspartokinase/homoserine dehydrogenase 1, chloroplastic-like [Sesamum indicum] |
| c40885.graph_c0 | 1.10372681    | 0.80841367    | 0.72646306    | 7.83595132     | 7.72876177     | 7.55953365     | 1.318E-38 | 2.04564  | up        | PREDICTED: putative ATP-dependent RNA helicase C550.03c isoform X1 [Sesamum indicum]                   |
| c40889.graph_c0 | 5.84827626    | 6.45382403    | 4.61913943    | 32.407421      | 31.3014475     | 30.3186117     | 3.766E-36 | 1.38673  | up        | PREDICTED: putative E3 ubiquitin-protein ligase RF298 [Sesamum indicum]                                |
| c40890.graph_c0 | 23.7750733    | 24.3378795    | 25.5752491    | 13.7273368     | 15.1805421     | 14.0017434     | 5.393E-75 | -1.87184 | down      | PREDICTED: low molecular weight phosphotyrosine protein phosphatase [Sesamum indicum]                  |
| c40893.graph_c0 | 60.2639037    | 49.9360852    | 59.1924473    | 262.002799     | 277.902918     | 279.765377     | 1.43E-35  | 1.18396  | up        | PREDICTED: 40S ribosomal protein S25-2 [Eucalyptus grandis]                                            |
| c40896.graph_c0 | 7.67777897    | 3.53935985    | 5.58222037    | 0              | 0              | 0              | 9.536E-17 | -Inf     | down      | -                                                                                                      |
| c40897.graph_c0 | 10.1755677    | 10.8046385    | 10.990467     | 2.56503677     | 1.84264716     | 2.4138814      | 2.88E-138 | -3.31924 | down      | PREDICTED: protein root UVB sensitive 6 [Sesamum indicum]                                              |
| c40898.graph_c0 | 2.06255478    | 2.47754414    | 1.32523228    | 0.19987372     | 0.13535042     | 0.36696448     | 5.622E-12 | -4.14281 | down      | PREDICTED: probable 2-oxoglutarate-dependent dioxygenase AOP1 [Sesamum indicum]                        |
| c40899.graph_c1 | 11.314966     | 9.25124955    | 11.3768578    | 66.0089322     | 65.8631069     | 62.2892093     | 3.18E-53  | 1.51221  | up        | hypothetical protein ARALYDRAFT_496862 [Arabidopsis lyrata subsp. lyrata]                              |
| c40901.graph_c0 | 4.90022557    | 5.26847555    | 5.13087575    | 23.9189124     | 22.5493236     | 25.7245328     | 1.998E-12 | 1.14797  | up        | hypothetical protein MIMGU_mgv1a003594mg [Erythranthe ontifata]                                        |
| c40903.graph_c0 | 23.852298     | 23.4216042    | 20.8138797    | 12.1491441     | 11.7642264     | 12.5555197     | 5.47E-110 | -1.98928 | down      | PREDICTED: serine/threonine-protein kinase/endoribonuclease IRE1a-like isoform X1 [Sesamum indicum]    |
| c40904.graph_c0 | 4.47052244    | 6.29094061    | 4.49592913    | 22.2260692     | 23.9371099     | 22.3245446     | 7.116E-10 | 1.07655  | up        | hypothetical protein MIMGU_mgv1a011525mg [Erythranthe ontifata]                                        |
| c40909.graph_c0 | 0.10059509    | 0.06713055    | 0.17235824    | 1.04793772     | 1.25425121     | 1.29260606     | 1.772E-06 | 2.30249  | up        | PREDICTED: pentatricopeptide repeat-containing protein At2g17140-like [Sesamum indicum]                |
| c40909.graph_c1 | 0.04141366    | 0             | 0.05321819    | 1.20396841     | 1.0055403      | 0.98242839     | 2.706E-10 | 3.97617  | up        | hypothetical protein MIMGU_mgv1a026412mg [Erythranthe ontifata]                                        |
| c40910.graph_c0 | 9.82537833    | 10.9788468    | 11.4514885    | 234.159301     | 207.000487     | 211.365017     | 1.4E-145  | 3.24606  | up        | PREDICTED: hippocampus abundant transcript-like protein 1 isoform X1 [Sesamum indicum]                 |
| c40910.graph_c1 | 9.94780145    | 11.038086     | 12.72302      | 222.936515     | 207.295314     | 203.286601     | 1.72E-248 | 3.13842  | up        | PREDICTED: hippocampus abundant transcript-like protein 1 isoform X1 [Sesamum indicum]                 |
| c40929.graph_c0 | 20132.0579    | 19213.0311    | 21254.6743    | 3669.99954     | 3972.13879     | 4094.39391     | 4.786E-53 | -3.45947 | down      | --                                                                                                     |
| c40931.graph_c0 | 4.36942192    | 5.84498358    | 4.3898154     | 3.031322       | 3.96213269     | 5.0177404      | 1.432E-06 | -1.3701  | down      | PREDICTED: cyclin-dependent kinase inhibitor 1 [Sesamum indicum]                                       |
| c40932.graph_c0 | 6.7489863     | 5.8212322     | 6.34832711    | 4.45277858     | 3.99491496     | 4.41779066     | 4.459E-38 | -1.64611 | down      | PREDICTED: uncharacterized protein LOC105163461 [Sesamum indicum]                                      |
| c40935.graph_c0 | 117.450405    | 118.36284     | 110.369065    | 55.8341433     | 56.0361516     | 56.2733282     | 1.06E-149 | -2.13152 | down      | hypothetical protein M569_02358 [Genlisea aurea]                                                       |
| c40938.graph_c0 | 1.73324258    | 1.80437728    | 1.3363712     | 16.0067242     | 15.8174519     | 15.528349      | 4.528E-50 | 2.19301  | up        | PREDICTED: endoglucanase 10-like [Sesamum indicum]                                                     |



| #ID             | 0 h-1<br>FPKM | 0 h-2<br>FPKM | 0 h-3<br>FPKM | 28 h-1<br>FPKM | 28 h-2<br>FPKM | 28 h-3<br>FPKM | FDR       | log2FC   | regulated | nr_annotation                                                                        |
|-----------------|---------------|---------------|---------------|----------------|----------------|----------------|-----------|----------|-----------|--------------------------------------------------------------------------------------|
| c40939.graph_c0 | 0             | 0             | 0.05648198    | 3.89730777     | 3.40352962     | 3.25837225     | 2.451E-20 | 6.41592  | up        | PREDICTED: uncharacterized protein LOC105156631 [Sesamum indicum]                    |
| c40940.graph_c0 | 0.08042897    | 0.04025476    | 0.05167721    | 1.66597646     | 1.58339005     | 1.59791848     | 2.669E-10 | 3.72773  | up        | PREDICTED: squamosa promoter-binding-like protein 12 [Sesamum indicum]               |
| c40943.graph_c0 | 7.04410164    | 7.0123059     | 4.8127445     | 58.5864193     | 59.5580525     | 56.725077      | 1.33E-123 | 2.12616  | up        | PREDICTED: uncharacterized protein LOC105157708 [Sesamum indicum]                    |
| c40949.graph_c0 | 65.7595936    | 65.0380562    | 77.2258523    | 59.6849475     | 78.3571703     | 82.1970127     | 1.226E-06 | -1.00984 | down      | PREDICTED: malate synthase [Tarenaya hassleriana]                                    |
| c40949.graph_c1 | 121.071073    | 130.770536    | 139.118586    | 104.057935     | 114.660369     | 122.03089      | 1.114E-18 | -1.29004 | down      | PREDICTED: malate synthase [Tarenaya hassleriana]                                    |
| c40952.graph_c0 | 8.95382337    | 6.24679252    | 8.13556794    | 34.772865      | 38.9342037     | 37.1709662     | 5.741E-13 | 1.1581   | up        | putative nitrilase-associated protein [Plantago major]                               |
| c40953.graph_c0 | 3.67825963    | 3.13462702    | 2.29948018    | 1.62567845     | 1.36997954     | 1.44445504     | 1.162E-10 | -2.12224 | down      | -                                                                                    |
| c40954.graph_c0 | 28.0425268    | 30.1028683    | 29.7580348    | 154.933605     | 156.544152     | 140.421561     | 1.392E-48 | 1.27039  | up        | PREDICTED: putative 4-hydroxy-4-methyl-2-oxoglutarate aldolase 3 [Sesamum indicum]   |
| c40955.graph_c0 | 5.9564231     | 5.48003711    | 5.72777923    | 50.7330902     | 48.3369419     | 43.5172905     | 7.793E-69 | 1.96354  | up        | PREDICTED: probable alanine--tRNA ligase, chloroplastic isoform X2 [Sesamum indicum] |
| c40956.graph_c0 | 1.21421697    | 0.83161193    | 1.02652426    | 10.7756173     | 11.6375032     | 12.0332715     | 1.959E-31 | 2.39802  | up        | PREDICTED: uncharacterized protein LOC105174334 [Sesamum indicum]                    |
| c40959.graph_c0 | 52.1536428    | 52.0088636    | 50.2266864    | 51.321895      | 52.7446771     | 53.9001521     | 1.547E-36 | -1.05686 | down      | hypothetical protein MIMGU_mgv1a008968mg [Erythranthe guttata]                       |
| c40960.graph_c0 | 13.5099371    | 12.088322     | 12.0462722    | 4.20811903     | 5.60884024     | 3.98973784     | 1.797E-54 | -2.53763 | down      | PREDICTED: transcription factor bHLH113-like [Sesamum indicum]                       |
| c40961.graph_c0 | 0.39790078    | 0.49787403    | 0.12782956    | 3.47030395     | 2.61113258     | 2.59576138     | 7.186E-05 | 2.00406  | up        | Peptidyl-prolyl cis-trans isomerase CYP38 [Morus notabilis]                          |
| c40966.graph_c0 | 0.88233765    | 1.00939563    | 1.78174671    | 5.40505675     | 5.70742209     | 5.15802152     | 0.0080611 | 1.04659  | up        | -                                                                                    |
| c40970.graph_c0 | 0.13931366    | 0.13945316    | 0.04475589    | 0.8100189      | 1.53130829     | 1.32193762     | 0.0001511 | 2.42249  | up        | PREDICTED: glycerophosphodiester phosphodiesterase GDPDL3-like [Sesamum indicum]     |
| c40971.graph_c0 | 1.43337841    | 1.34322987    | 2.11628069    | 34.7774248     | 41.4473941     | 39.3024854     | 8.136E-79 | 3.46509  | up        | PREDICTED: uncharacterized protein LOC105164832 [Sesamum indicum]                    |
| c40977.graph_c0 | 0.11641632    | 0.11653289    | 0.14959958    | 10.9147813     | 8.55630008     | 8.69924751     | 3.258E-18 | 5.10806  | up        | class 1 KNOX homeobox transcription factor SIM-like 2 [Prunus nersical]              |
| c40979.graph_c0 | 0.88026104    | 0.68088284    | 1.07975346    | 24.8637363     | 29.6702616     | 27.5023323     | 1.597E-81 | 3.8628   | up        | PREDICTED: uncharacterized protein LOC105165458 [Sesamum indicum]                    |
| c40984.graph_c1 | 21.3471099    | 20.4042601    | 20.5239986    | 7.45259918     | 8.66613419     | 8.01620646     | 3.04E-124 | -2.45785 | down      | PREDICTED: uncharacterized protein LOC105159405 [Sesamum indicum]                    |
| c40985.graph_c0 | 1.61098934    | 1.40585859    | 1.11471504    | 11.5584677     | 11.3849592     | 10.4605187     | 1.058E-17 | 1.92868  | up        | PREDICTED: zinc transporter 4, chloroplastic-like [Sesamum indicum]                  |
| c40989.graph_c0 | 2.48932088    | 1.86886017    | 2.13258393    | 22.2132511     | 19.9884181     | 21.160473      | 4.596E-46 | 2.19808  | up        | PREDICTED: GDSL esterase/lipase At4g10955-like [Sesamum indicum]                     |
| c40992.graph_c0 | 0             | 0             | 0             | 4.62579805     | 5.3787256      | 3.92191542     | 3.688E-36 | Inf      | up        | PREDICTED: hippocampus abundant transcript 1 protein-like [Sesamum indicum]          |
| c40996.graph_c0 | 69.4210047    | 75.6683288    | 65.3658601    | 30.7985614     | 36.4757083     | 32.0320118     | 1.177E-88 | -2.17346 | down      | PREDICTED: probable methionine--tRNA ligase [Sesamum indicum]                        |

| #ID             | 0 h-1<br>FPKM | 0 h-2<br>FPKM | 0 h-3<br>FPKM | 28 h-1<br>FPKM | 28 h-2<br>FPKM | 28 h-3<br>FPKM | FDR       | log2FC   | regulated | nr_annotation                                                                             |
|-----------------|---------------|---------------|---------------|----------------|----------------|----------------|-----------|----------|-----------|-------------------------------------------------------------------------------------------|
| c40998.graph_c0 | 15.0762415    | 15.0650006    | 14.3695743    | 15.3555538     | 13.726497      | 14.8706054     | 4.945E-29 | -1.10791 | down      | PREDICTED: protein FAM63A-like [Sesamum indicum]                                          |
| c40999.graph_c0 | 0.15939825    | 0.10637191    | 0.17069422    | 1.56397133     | 1.42955305     | 1.32345405     | 7.213E-07 | 2.21293  | up        | PREDICTED: tyrosine-sulfated glycopeptide receptor 1 [Sesamum indicum]                    |
| c41000.graph_c0 | 3.27286716    | 3.53209323    | 4.20576388    | 22.3189054     | 22.5848702     | 19.8800919     | 9.353E-33 | 1.4624   | up        | PREDICTED: ATP-dependent zinc metalloprotease FTSH 2, chloroplastic [Sesamum indicum]     |
| c41001.graph_c0 | 40.1248656    | 38.1541695    | 38.6097999    | 261.383537     | 296.77137      | 258.963033     | 1.881E-59 | 1.71476  | up        | PREDICTED: uncharacterized protein LOC105155456 [Sesamum indicum]                         |
| c41003.graph_c0 | 2001.21231    | 1906.87187    | 2046.74872    | 118.90689      | 127.933423     | 144.284401     | 0         | -5.01865 | down      | hypothetical protein M569_01497, partial [Genlisea aurea]                                 |
| c41005.graph_c0 | 0.52003141    | 0.67365572    | 0.58964202    | 0.5780501      | 0.4014808      | 0.58053435     | 0.0012173 | -1.28318 | down      | PREDICTED: putative nuclease HARBII [Camelina sativa]                                     |
| c41011.graph_c0 | 15.9990072    | 14.413525     | 13.3372244    | 12.2839239     | 11.7911637     | 12.0672245     | 9.072E-31 | -1.36396 | down      | PREDICTED: xyloglucan galactosyltransferase KATAMARI1 homolog [Sesamum indicum]           |
| c41012.graph_c0 | 3.32648265    | 3.48468867    | 2.38585781    | 13.9437621     | 15.2804953     | 14.8648012     | 1.413E-06 | 1.1749   | up        | PREDICTED: UMP-CMP kinase isoform X2 [Sesamum indicum]                                    |
| c41013.graph_c0 | 27.2127615    | 30.0006168    | 27.7641192    | 13.6431088     | 13.3583171     | 14.5212608     | 4.16E-110 | -2.12333 | down      | PREDICTED: uncharacterized protein LOC105172362 [Sesamum indicum]                         |
| c41014.graph_c0 | 16.5728759    | 15.0507375    | 16.9139816    | 150.999799     | 154.212423     | 140.820759     | 1.46E-127 | 2.10847  | up        | PREDICTED: short-chain dehydrogenase TIC 32, chloroplastic-like [Sesamum indicum]         |
| c41017.graph_c0 | 0.10299957    | 0.13747028    | 0.22059754    | 4.81596069     | 5.42981861     | 4.84605562     | 3.134E-24 | 3.93217  | up        | PREDICTED: protein PNS1 isoform X1 [Sesamum indicum]                                      |
| c41021.graph_c0 | 165.918449    | 174.937366    | 170.78556     | 130.368155     | 123.585051     | 127.133942     | 1.003E-72 | -1.51573 | down      | PREDICTED: glycosyltransferase 6 [Sesamum indicum]                                        |
| c41024.graph_c0 | 6.13656721    | 5.25154139    | 5.43420897    | 56.5937466     | 56.8785043     | 50.328507      | 4.184E-95 | 2.19359  | up        | PREDICTED: glycerol-3-phosphate acyltransferase, chloroplastic [Sesamum indicum]          |
| c41028.graph_c0 | 1.64702555    | 1.56057767    | 1.26020196    | 15.3971528     | 14.5704804     | 14.15961       | 9.479E-79 | 2.21657  | up        | PREDICTED: DNA-directed RNA polymerase V subunit 1 [Sesamum indicum]                      |
| c41039.graph_c0 | 58.8712785    | 61.5639824    | 63.5645213    | 48.093888      | 45.3235439     | 46.1880281     | 1.226E-56 | -1.48979 | down      | hypothetical protein MIMGU_mgv1a0073611mg, partial [Erythranthe guttata]                  |
| c41040.graph_c0 | 0.01929667    | 0.01931599    | 0.07439095    | 5.18914211     | 4.97655772     | 4.45173449     | 2.309E-51 | 5.90459  | up        | PREDICTED: glucomannan 4-beta-mannosyltransferase 9-like [Nicotiana tomentosiformis]      |
| c41044.graph_c0 | 2.03609404    | 2.44575945    | 1.15124304    | 17.2843141     | 20.2558822     | 14.5385671     | 7.186E-12 | 2.12379  | up        | PREDICTED: phytochrome B [Sesamum indicum]                                                |
| c41044.graph_c1 | 1.18362858    | 1.51586472    | 0.87234373    | 11.1706568     | 11.171192      | 10.8184514     | 1.545E-44 | 2.12835  | up        | PREDICTED: phytochrome B [Sesamum indicum]                                                |
| c41045.graph_c0 | 25.6669068    | 28.094442     | 26.3998969    | 24.2999351     | 23.7967186     | 24.2273911     | 5.763E-53 | -1.23902 | down      | PREDICTED: probable pre-mRNA-splicing factor ATP-dependent RNA helicase [Sesamum indicum] |
| c41058.graph_c0 | 0.55793016    | 0.40617371    | 0.0651784     | 10.1743743     | 12.1488215     | 11.7313786     | 9.093E-34 | 3.97571  | up        | PREDICTED: axial regulator YABBY 5 [Beta vulgaris subsp. vulgare]                         |
| c41070.graph_c1 | 41.580037     | 39.7417026    | 43.6099361    | 21.0302909     | 21.8115591     | 24.0118126     | 1.919E-68 | -1.99287 | down      | probable tocopherol cyclase, chloroplastic [Sesamum indicum]                              |
| c41074.graph_c0 | 37.9708001    | 35.4263411    | 35.6179063    | 25.289199      | 26.8275159     | 28.2074634     | 1.88E-49  | -1.53018 | down      | PREDICTED: uncharacterized protein LOC105177909 [Sesamum indicum]                         |

| #ID             | 0 h-1<br>FPKM | 0 h-2<br>FPKM | 0 h-3<br>FPKM | 28 h-1<br>FPKM | 28 h-2<br>FPKM | 28 h-3<br>FPKM | FDR       | log2FC   | regulated | nr_annotation                                                                                          |
|-----------------|---------------|---------------|---------------|----------------|----------------|----------------|-----------|----------|-----------|--------------------------------------------------------------------------------------------------------|
| c41077.graph_c0 | 2.53352231    | 2.47775904    | 2.13302941    | 10.9846017     | 10.7971232     | 10.4140601     | 2.473E-10 | 1.08344  | up        | PREDICTED: ubiquitin carboxyl-terminal hydrolase 24-like [Sesamum indicum]                             |
| c41079.graph_c0 | 0.33164247    | 0.96272622    | 0.59664319    | 7.47211092     | 8.40062457     | 7.1789395      | 4.895E-22 | 2.51384  | up        | PREDICTED: HIPL1 protein-like [Sesamum indicum]                                                        |
| c41083.graph_c0 | 0.03722506    | 0             | 0             | 3.24659496     | 2.17410005     | 2.25181573     | 8.307E-15 | 6.62791  | up        | hypothetical protein MIMGU_mgv1a01364/mg [Erythranthe guttata]                                         |
| c41084.graph_c0 | 3.67889597    | 3.71157652    | 2.9035205     | 14.1269296     | 15.625709      | 15.4787492     | 3.41E-13  | 1.04813  | up        | PREDICTED: WD repeat-containing protein 43 [Sesamum indicum]                                           |
| c41088.graph_c0 | 6.69602699    | 7.99171898    | 6.50865291    | 112.806076     | 98.1352138     | 97.2673137     | 3.587E-76 | 2.77211  | up        | PREDICTED: transcription factor ILR3-like [Sesamum indicum]                                            |
| c41093.graph_c0 | 2.29088888    | 3.16374301    | 2.53501028    | 13.3662888     | 12.6252994     | 12.5044312     | 2.452E-18 | 1.17757  | up        | PREDICTED: uncharacterized protein LOC105174509 [Sesamum indicum]                                      |
| c41098.graph_c0 | 6.36257991    | 5.58061185    | 7.16413337    | 1.05439755     | 1.1832275      | 1.04474689     | 7.989E-37 | -3.63434 | down      | -                                                                                                      |
| c41099.graph_c0 | 4.14188601    | 0.99504804    | 1.9160955     | 0              | 0              | 0              | 2.238E-06 | -Inf     | down      | PREDICTED: LOW QUALITY PROTEIN: oryzain gamma chain-like [Phoenix dactylifera]                         |
| c41100.graph_c0 | 501.726751    | 516.389476    | 501.810512    | 252.864563     | 247.134379     | 254.020033     | 1.68E-125 | -2.1017  | down      | PREDICTED: SNF1-related protein kinase catalytic subunit alpha KIN10-like isoform X2 [Sesamum indicum] |
| c41100.graph_c1 | 708.821262    | 714.438608    | 702.827095    | 290.721589     | 286.369774     | 295.744951     | 3.49E-148 | -2.3747  | down      | PREDICTED: uncharacterized protein LOC105162997 [Sesamum indicum]                                      |
| c41101.graph_c0 | 32.9508027    | 34.2318335    | 32.5774734    | 505.549696     | 537.541265     | 474.072109     | 2.65E-190 | 2.83598  | up        | -                                                                                                      |
| c41104.graph_c0 | 16.8621193    | 18.4314762    | 18.4457799    | 5.6599779      | 4.89388575     | 6.26236712     | 1.25E-97  | -2.76663 | down      | PREDICTED: UPF0496 protein At4g34320 [Sesamum indicum]                                                 |
| c41105.graph_c0 | 41.6796703    | 39.1225199    | 34.6740104    | 22.2392426     | 22.9702469     | 20.4566637     | 1.068E-70 | -1.90318 | down      | PREDICTED: probable BOI-related E3 ubiquitin-protein ligase 2 [Sesamum indicum]                        |
| c41105.graph_c1 | 0.28385933    | 0.5276952     | 0.10422014    | 4.42087124     | 3.88518871     | 3.65549343     | 4.492E-11 | 2.62652  | up        | PREDICTED: B3 domain-containing protein At3g19184-like isoform X1 [Sesamum indicum]                    |
| c41107.graph_c0 | 129.647597    | 121.413229    | 135.118396    | 110.412538     | 122.965254     | 131.174718     | 8.294E-24 | -1.17397 | down      | PREDICTED: isopentenyl-diphosphate Delta-isomerase I [Sesamum indicum]                                 |
| c41118.graph_c0 | 25.5906067    | 24.277726     | 25.4784241    | 26.3235988     | 26.1127448     | 26.0738753     | 5.654E-33 | -1.03133 | down      | hypothetical protein MIMGU_mgv1a00278/mg [Erythranthe guttata]                                         |
| c41122.graph_c0 | 111.385994    | 118.892775    | 112.359212    | 507.323979     | 589.550851     | 551.337048     | 3.463E-31 | 1.17556  | up        | PREDICTED: uncharacterized protein LOC105165162 [Sesamum indicum]                                      |
| c41124.graph_c0 | 1.83300727    | 1.49080974    | 1.71754254    | 10.2414345     | 10.0489678     | 8.90046688     | 1.203E-11 | 1.4428   | up        | hypothetical protein MIMGU_mgv1a016809mg [Erythranthe guttata]                                         |
| c41125.graph_c0 | 15.7388567    | 14.1114973    | 14.43465      | 154.015922     | 153.846772     | 142.167811     | 1.65E-159 | 2.25506  | up        | PREDICTED: isocitrate dehydrogenase [NADP] [Sesamum indicum]                                           |
| c41127.graph_c2 | 0.23381423    | 0.46809673    | 0.66101321    | 1.93725715     | 2.57771179     | 2.05224851     | 0.0029211 | 1.16628  | up        | PREDICTED: leucine-rich repeat receptor-like serine/threonine-protein kinase BAM3 [Sesamum indicum]    |
| c41129.graph_c0 | 1.86144977    | 1.77664797    | 1.39071898    | 14.9132632     | 13.1243853     | 14.1972845     | 6.574E-22 | 1.98339  | up        | hypothetical protein MIMGU_mgv1a010701mg [Erythranthe guttata]                                         |
| c41131.graph_c0 | 13.9506951    | 15.3581019    | 13.2995681    | 10.3592259     | 10.64422       | 9.6375467      | 3.987E-47 | -1.56575 | down      | PREDICTED: lysM domain receptor-like kinase 4 [Sesamum indicum]                                        |
| c41135.graph_c0 | 4.06981597    | 5.49247841    | 4.24927315    | 5.01789795     | 4.69761158     | 4.82727515     | 3.605E-06 | -1.0157  | down      | hypothetical protein MIMGU_mgv1a008665mg [Erythranthe guttata]                                         |

| #ID             | 0 h-1<br>FPKM | 0 h-2<br>FPKM | 0 h-3<br>FPKM | 28 h-1<br>FPKM | 28 h-2<br>FPKM | 28 h-3<br>FPKM | FDR       | log2FC   | regulated | nr_annotation                                                                     |
|-----------------|---------------|---------------|---------------|----------------|----------------|----------------|-----------|----------|-----------|-----------------------------------------------------------------------------------|
| c41136.graph_c1 | 146.777213    | 135.821772    | 148.843321    | 24.907351      | 27.8061699     | 33.2434507     | 2.8E-167  | -3.41739 | down      | PREDICTED: protein TRANSPARENT TESTA 12-like [Nicotiana tomentosiformis]          |
| c41136.graph_c2 | 69.5671798    | 64.7003918    | 77.7361568    | 12.2340477     | 14.713881      | 14.6233638     | 6.815E-53 | -3.44249 | down      | PREDICTED: protein TRANSPARENT TESTA 12-like [Sesamum indicum]                    |
| c41137.graph_c0 | 2.12897569    | 2.04042211    | 2.34775876    | 15.5281424     | 14.9815763     | 13.4051191     | 7.329E-46 | 1.6598   | up        | PREDICTED: ABC transporter G family member 29-like [Vitis vinifera]               |
| c41138.graph_c1 | 87.0492902    | 85.1440967    | 85.2316083    | 86.4974131     | 90.507315      | 85.995863      | 2.06E-37  | -1.0596  | down      | PREDICTED: syntaxin-51-like [Sesamum indicum]                                     |
| c41143.graph_c0 | 17.8342171    | 19.3024231    | 15.9629684    | 8.70314823     | 8.96273899     | 8.40325461     | 2.04E-60  | -2.11551 | down      | PREDICTED: formin-like protein 5 [Sesamum indicum]                                |
| c41144.graph_c0 | 48.3231579    | 52.4413695    | 46.3143668    | 249.35597      | 274.782029     | 253.731458     | 1.754E-61 | 1.31294  | up        | hypothetical protein MIMGU_mgv1a008949mg [Erythranthe outtata]                    |
| c41149.graph_c0 | 0.08841046    | 0.28319677    | 0.29538845    | 1.10520686     | 1.42722645     | 1.38421918     | 4.895E-05 | 1.45369  | up        | PREDICTED: uncharacterized protein LOC105158269 isoform X1 [Sesamum indicum]      |
| c41152.graph_c0 | 16.428353     | 15.0418203    | 14.7629958    | 10.670882      | 10.9918209     | 9.97461983     | 1.918E-63 | -1.63709 | down      | PREDICTED: AP2-associated protein kinase 1 isoform X4 [Sesamum indicum]           |
| c41160.graph_c0 | 2.99498584    | 3.85455197    | 3.71122269    | 16.3514519     | 16.7058212     | 18.2483487     | 1.165E-15 | 1.18832  | up        | hypothetical protein POP1K_0019s10450g, partial [Populus trichocarpa]             |
| c41163.graph_c0 | 0.33364585    | 0.61229656    | 0.28583208    | 24.8150023     | 37.1480808     | 30.670066      | 4.634E-29 | 5.14533  | up        | -                                                                                 |
| c41164.graph_c1 | 47.8637264    | 48.9719402    | 46.4491061    | 629.439262     | 668.50478      | 622.489089     | 3.37E-230 | 2.65414  | up        | PREDICTED: CASP-like protein 2A1 [Sesamum indicum]                                |
| c41167.graph_c0 | 2.66078802    | 2.43351406    | 2.58286248    | 13.8847317     | 13.8430313     | 13.5208665     | 7.423E-26 | 1.33518  | up        | PREDICTED: uncharacterized protein LOC105165931 isoform X2 [Sesamum indicum]      |
| c41168.graph_c0 | 6.02115991    | 5.01326952    | 5.53190008    | 32.1462564     | 26.7540111     | 28.2501419     | 1.451E-19 | 1.30532  | up        | hypothetical protein MIMGU_mgv1a00360/mg [Erythranthe outtata]                    |
| c41178.graph_c0 | 15.3907975    | 16.7594571    | 13.7642686    | 15.116139      | 13.9214254     | 12.9513783     | 3.614E-12 | -1.21826 | down      | PREDICTED: probable E3 ubiquitin-protein ligase ARI2 isoform X1 [Sesamum indicum] |
| c41185.graph_c0 | 0.65225977    | 0.88001306    | 0.80173704    | 4.39019527     | 3.77783449     | 3.80100539     | 4.271E-06 | 1.26597  | up        | -                                                                                 |
| c41190.graph_c0 | 0.39633158    | 0.34005296    | 0.36378698    | 9.5056998      | 11.1464359     | 10.0231046     | 1.78E-51  | 3.71117  | up        | PREDICTED: pectinesterase-like [Sesamum indicum]                                  |
| c41192.graph_c1 | 66.3198153    | 65.3430125    | 71.1008223    | 32.4322926     | 35.1897214     | 34.4431632     | 2.347E-73 | -2.08183 | down      | hypothetical protein MIMGU_mgv1a014126mg [Erythranthe outtata]                    |
| c41194.graph_c0 | 12.9402526    | 14.1307749    | 11.2117999    | 2.99246851     | 3.69905508     | 2.7034545      | 2.034E-63 | -3.11639 | down      | unnamed protein product [Coffea canephora]                                        |
| c41196.graph_c0 | 362.369009    | 351.300466    | 367.666676    | 105.936113     | 110.638558     | 113.752292     | 0         | -2.80149 | down      | -                                                                                 |
| c41198.graph_c0 | 67.9110422    | 67.3090005    | 62.6361745    | 7.47436635     | 9.46408597     | 8.15608846     | 0         | -4.06891 | down      | -                                                                                 |
| c41199.graph_c0 | 0.02624224    | 0.05253704    | 0.13488929    | 2.42223441     | 2.11816708     | 2.22553433     | 4.416E-16 | 3.87511  | up        | PREDICTED: U-box domain-containing protein 13-like [Sesamum indicum]              |
| c41200.graph_c0 | 0.14849897    | 0.2147133     | 0.10601503    | 0.75549737     | 0.96366274     | 0.58712351     | 0.0055724 | 1.20961  | up        | PREDICTED: uncharacterized protein LOC105159953 isoform X1 [Sesamum indicum]      |
| c41201.graph_c0 | 1.7541774     | 1.47271879    | 1.81789307    | 47.2956428     | 71.4448642     | 52.1842563     | 2.962E-20 | 3.98988  | up        | cytochrome P450 98A3 [Sesamum indicum]                                            |
| c41202.graph_c0 | 162.028601    | 148.498406    | 157.668906    | 78.2200158     | 72.0480091     | 81.5208724     | 3.69E-139 | -2.10426 | down      | PREDICTED: GATA transcription factor 15-like [Sesamum indicum]                    |
| c41204.graph_c0 | 9.37608627    | 9.56666178    | 8.69921262    | 1.23660547     | 1.23531952     | 1.8678344      | 2.48E-104 | -3.75858 | down      | PREDICTED: uncharacterized protein LOC100265977 [Vitis vinifera]                  |

| #ID             | 0 h-1<br>FPKM | 0 h-2<br>FPKM | 0 h-3<br>FPKM | 28 h-1<br>FPKM | 28 h-2<br>FPKM | 28 h-3<br>FPKM | FDR       | log2FC   | regulated | nr_annotation                                                                                     |
|-----------------|---------------|---------------|---------------|----------------|----------------|----------------|-----------|----------|-----------|---------------------------------------------------------------------------------------------------|
| c41210.graph_c0 | 1.22673056    | 0.95934292    | 0.83746108    | 25.7443926     | 23.3202428     | 25.1904689     | 7.614E-85 | 3.53224  | up        | PREDICTED: probable beta-1,3-galactosyltransferase 6 [Sesamum indicum]                            |
| c41214.graph_c0 | 0.50876506    | 0.145507      | 0.46698803    | 2.6411965      | 3.62482427     | 2.75864932     | 2.55E-05  | 1.91594  | up        | -                                                                                                 |
| c41219.graph_c0 | 5.21990891    | 4.70262227    | 3.73719707    | 29.3206521     | 34.6459338     | 24.8983499     | 2.077E-10 | 1.61385  | up        | hypothetical protein MIMGU_mgv1a008825mg [Erythranthe outtata]                                    |
| c41223.graph_c0 | 15.4207032    | 16.2877941    | 15.7163078    | 99.7612186     | 110.220939     | 98.8751575     | 8.045E-79 | 1.61221  | up        | PREDICTED: 6-phosphogluconate dehydrogenase, decarboxylating 3 [Sesamum indicum]                  |
| c41223.graph_c1 | 1.3510688     | 1.35242169    | 0.43404422    | 14.483748      | 14.6290303     | 12.8201981     | 2.658E-07 | 2.66102  | up        | -                                                                                                 |
| c41230.graph_c0 | 2.33233694    | 1.92045634    | 1.98198318    | 0.38277107     | 0.19748937     | 0.51312683     | 2.512E-25 | -3.59701 | down      | hypothetical protein MIMGU_mgv1a002463mg [Erythranthe outtata]                                    |
| c41232.graph_c0 | 55.8667625    | 56.227385     | 51.5942266    | 577.661706     | 506.557579     | 487.793868     | 1.125E-56 | 2.17373  | up        | PREDICTED: uncharacterized protein LOC105163662 isoform X2 [Sesamum indicum]                      |
| c41239.graph_c0 | 0             | 0             | 0             | 4.53097772     | 4.50015286     | 8.42970906     | 1.887E-07 | Inf      | up        | --                                                                                                |
| c41241.graph_c0 | 18.8661384    | 18.7323209    | 16.6634835    | 10.9768324     | 10.2614411     | 10.9323721     | 7.332E-81 | -1.84293 | down      | PREDICTED: uncharacterized protein LOC105172605 [Sesamum indicum]                                 |
| c41241.graph_c1 | 10.7234493    | 9.94875889    | 9.18670461    | 6.71655742     | 7.03701753     | 5.79088182     | 4.915E-16 | -1.70096 | down      | PREDICTED: uncharacterized protein LOC105172605 [Sesamum indicum]                                 |
| c41242.graph_c0 | 2.01551522    | 1.73851287    | 1.40522191    | 11.0799883     | 10.5107319     | 10.1220524     | 4.246E-22 | 1.53331  | up        | PREDICTED: pentatricopeptide repeat-containing protein At3g02490, mitochondrial [Sesamum indicum] |
| c41245.graph_c0 | 0.16575239    | 0.08295918    | 0.26624798    | 0.99386003     | 1.22367603     | 1.11817169     | 6.546E-05 | 1.59553  | up        | PREDICTED: COP9 signalosome complex subunit 1-like [Sesamum indicum]                              |
| c41246.graph_c0 | 0.85830699    | 0.91644421    | 0.77207092    | 7.38178208     | 8.39233952     | 7.32997387     | 5.493E-20 | 2.09193  | up        | PREDICTED: phosphoglycolate phosphatase 2 [Sesamum indicum]                                       |
| c41251.graph_c0 | 0.15472012    | 0.54206268    | 0.29823223    | 2.24899388     | 2.84288285     | 2.89037801     | 5.547E-05 | 1.91153  | up        | -                                                                                                 |
| c41253.graph_c0 | 0.14028516    | 0.28085128    | 0.18027199    | 34.2580388     | 38.2965106     | 39.0195157     | 2.306E-55 | 6.44455  | up        | -                                                                                                 |
| c41257.graph_c0 | 5.532751      | 3.81951118    | 3.67748487    | 0              | 0              | 0              | 1.028E-28 | -Inf     | down      | metallothionein-like protein [Oryza officinalis]                                                  |
| c41258.graph_c0 | 3.28521468    | 3.76546297    | 3.89936903    | 1.95023844     | 2.40269942     | 2.64734016     | 1.395E-19 | -1.73707 | down      | PREDICTED: phosphoenolpyruvate carboxykinase [ATP]-like [Sesamum indicum]                         |
| c41275.graph_c0 | 0.08226679    | 0.74114247    | 0.31714823    | 3.34829744     | 2.69928451     | 2.92733932     | 7.281E-05 | 1.8825   | up        | -                                                                                                 |
| c41277.graph_c0 | 1.36006256    | 1.32976342    | 1.30063943    | 12.160672      | 10.8969225     | 11.8550883     | 7.112E-26 | 2.03934  | up        | PREDICTED: preprotein translocase subunit SCY1, chloroplastic [Sesamum indicum]                   |
| c41278.graph_c2 | 0.62091596    | 0.62153771    | 0.3989508     | 21.6613508     | 20.9842853     | 22.5546558     | 3.32E-24  | 4.22707  | up        | PREDICTED: uncharacterized protein LOC101261197 [Solanum lycopersicum]                            |
| c41279.graph_c1 | 53.6534929    | 55.5784361    | 57.1888097    | 57.5868212     | 56.9238817     | 62.3361566     | 1.1E-31   | -1.00321 | down      | PREDICTED: nucleolar GTP-binding protein 2 [Sesamum indicum]                                      |
| c41280.graph_c0 | 3.53934305    | 3.71159608    | 3.97064726    | 2.49071146     | 2.54381386     | 2.06571825     | 1.703E-10 | -1.75323 | down      | hypothetical protein MIMGU_mgv1a019699mg [Erythranthe outtata]                                    |
| c41281.graph_c0 | 2.88664037    | 1.90446355    | 1.09597303    | 1.43045017     | 1.07630199     | 1.05051209     | 0.0069163 | -1.8071  | down      | -                                                                                                 |
| c41283.graph_c0 | 1.33806722    | 1.42490116    | 1.2804559     | 10.1595165     | 9.84565965     | 10.4343605     | 1.573E-21 | 1.82274  | up        | PREDICTED: armadillo repeat-containing protein 6 [Sesamum indicum]                                |

| #ID             | 0 h-1<br>FPKM | 0 h-2<br>FPKM | 0 h-3<br>FPKM | 28 h-1<br>FPKM | 28 h-2<br>FPKM | 28 h-3<br>FPKM | FDR       | log2FC   | regulated | nr_annotation                                                                                          |
|-----------------|---------------|---------------|---------------|----------------|----------------|----------------|-----------|----------|-----------|--------------------------------------------------------------------------------------------------------|
| c41284.graph_c0 | 0.06186708    | 0.08257205    | 0.0530011     | 0.4496464      | 0.4736533      | 0.67266428     | 5.486E-05 | 1.92899  | up        | PREDICTED: putative late blight resistance protein homolog R1A-3 [Sesamum indicum]                     |
| c41289.graph_c0 | 7.09874359    | 6.98872248    | 7.31778197    | 88.0770641     | 77.7848344     | 75.2011286     | 8.374E-67 | 2.40202  | up        | PREDICTED: uncharacterized protein LOC105166112 [Sesamum indicum]                                      |
| c41291.graph_c0 | 5.90919927    | 5.50634823    | 5.49452354    | 3.50914295     | 3.23148035     | 2.93466164     | 4.579E-36 | -1.89585 | down      | hypothetical protein MIMGU_mgv11b004345mg [Erythranthe guttata]                                        |
| c41293.graph_c0 | 10.3931163    | 10.5630867    | 10.3239344    | 8.71219338     | 8.05458273     | 8.37585597     | 1.072E-29 | -1.40546 | down      | PREDICTED: cell wall / vacuolar inhibitor of fructosidase 1-like [Sesamum indicum]                     |
| c41296.graph_c0 | 8.3318276     | 7.75145274    | 7.93557512    | 54.9271673     | 58.0848978     | 58.1905838     | 4.292E-32 | 1.74346  | up        | -                                                                                                      |
| c41298.graph_c0 | 35.1650395    | 38.2370615    | 34.4981956    | 30.7996519     | 36.4236635     | 30.5864523     | 8.242E-42 | -1.2323  | down      | unnamed protein product [Coffea canephora]                                                             |
| c41304.graph_c0 | 2.61759397    | 2.08646758    | 1.86872883    | 1.72629923     | 2.95832307     | 2.09859517     | 0.0004547 | -1.04223 | down      | PREDICTED: anthocyanidin 3-O-glucosyltransferase 2-like [Sesamum indicum]                              |
| c41305.graph_c0 | 0.44239496    | 0.55354744    | 0.52112046    | 7.28801581     | 6.24169816     | 7.80538682     | 1.131E-20 | 2.72273  | up        | PREDICTED: dehydrogenase/reductase SDR family member on chromosome X-like isoform X1 [Sesamum indicum] |
| c41313.graph_c0 | 0             | 0             | 0             | 8.29505438     | 8.24533919     | 6.00987414     | 2.203E-42 | Inf      | up        | PREDICTED: uncharacterized protein LOC105168700 [Sesamum indicum]                                      |
| c41315.graph_c0 | 11.3013936    | 10.6928357    | 9.94708098    | 2.30661163     | 2.99698995     | 2.29533689     | 4.415E-90 | -3.16149 | down      | -                                                                                                      |
| c41319.graph_c0 | 6.81877715    | 7.48402362    | 7.635402      | 3.71290215     | 4.0718022      | 3.6278356      | 1.017E-53 | -2.03502 | down      | hypothetical protein MIMGU_mgv1a0011691mg, partial [Erythranthe guttata]                               |
| c41321.graph_c0 | 7.2384167     | 8.84987113    | 8.16897855    | 6.48383914     | 5.50374201     | 5.87686192     | 1.756E-19 | -1.53277 | down      | PREDICTED: probable amino acid permease 7 [Sesamum indicum]                                            |
| c41326.graph_c0 | 6.11389799    | 6.25939947    | 5.87211791    | 71.3451301     | 66.1623568     | 59.5758166     | 2.08E-65  | 2.34265  | up        | PREDICTED: ABC transporter C family member 4 [Sesamum indicum]                                         |
| c41330.graph_c0 | 24.176733     | 21.7297193    | 25.543633     | 7.1770957      | 6.45231241     | 6.73996787     | 2.357E-58 | -2.90211 | down      | PREDICTED: E3 ubiquitin-protein ligase RNF5-like [Sesamum indicum]                                     |
| c41334.graph_c1 | 49.1611456    | 54.8161931    | 49.1688643    | 47.7944087     | 47.4670562     | 48.2476437     | 4.484E-42 | -1.18392 | down      | PREDICTED: dnaJ homolog subfamily B member 4-like [Malus domestica]                                    |
| c41336.graph_c0 | 0             | 0.06135122    | 0             | 7.21630773     | 4.38398625     | 5.59766062     | 1.493E-15 | 7.04954  | up        | -                                                                                                      |
| c41339.graph_c0 | 4.67610746    | 4.08896587    | 4.83481408    | 0.85940799     | 0.4937958      | 0.54189038     | 8.894E-40 | -3.93515 | down      | PREDICTED: C2 and GRAM domain-containing protein At1g03370-like [Sesamum indicum]                      |
| c41341.graph_c0 | 17.8974575    | 18.1076042    | 19.0012714    | 16.106186      | 15.5253094     | 14.6458197     | 1.147E-35 | -1.34094 | down      | PREDICTED: E3 ubiquitin-protein ligase PRT1 [Nicotiana tomentosiformis]                                |
| c41344.graph_c0 | 0.16754379    | 0.06708463    | 0.25836049    | 2.60587508     | 2.70469053     | 2.60331621     | 1.428E-11 | 2.9049   | up        | PREDICTED: O-glucosyltransferase rumi homolog isoform X2 [Sesamum indicum]                             |
| c41345.graph_c0 | 43.3034388    | 43.3468007    | 40.9385707    | 25.0133131     | 22.2385512     | 23.9297384     | 4.94E-117 | -1.93156 | down      | PREDICTED: F-box/kelch-repeat protein At1g51550 [Sesamum indicum]                                      |
| c41349.graph_c0 | 5.42297203    | 4.36154868    | 5.23662074    | 28.0909103     | 31.7608917     | 29.354229      | 8.918E-38 | 1.47927  | up        | PREDICTED: peptidyl-prolyl cis-trans isomerase CYP23 isoform X2 [Sesamum indicum]                      |
| c41356.graph_c0 | 0.99640199    | 0.96300664    | 0.83889325    | 0.0249717      | 0              | 0.0203767      | 1.717E-29 | -7.03175 | down      | hypothetical protein MIMGU_mgv1a004102mg [Erythranthe guttata]                                         |

| #ID             | 0 h-1<br>FPKM | 0 h-2<br>FPKM | 0 h-3<br>FPKM | 28 h-1<br>FPKM | 28 h-2<br>FPKM | 28 h-3<br>FPKM | FDR       | log2FC   | regulated | nr_annotation                                                                                         |
|-----------------|---------------|---------------|---------------|----------------|----------------|----------------|-----------|----------|-----------|-------------------------------------------------------------------------------------------------------|
| c41358.graph_c0 | 12.2850868    | 11.2995097    | 12.1697943    | 63.4600451     | 64.8023        | 64.2330266     | 1.03E-51  | 1.33796  | up        | PREDICTED: glucose-6-phosphate isomerase 1, chloroplastic [Sesamum indicum]                           |
| c41361.graph_c0 | 0.39625075    | 0.57694187    | 0.55548862    | 7.40926836     | 6.92626597     | 7.64817345     | 5.082E-22 | 2.75277  | up        | hypothetical protein MIMGU_mgv1a00121/mg [Erythranthe                                                 |
| c41376.graph_c0 | 6.53293407    | 4.12399375    | 3.93282977    | 29.6007603     | 28.9668112     | 31.4490387     | 5.547E-20 | 1.54076  | up        | hypothetical protein MIMGU_mgv1a014628mg [Erythranthe                                                 |
| c41377.graph_c0 | 1.03828247    | 0.62359329    | 1.51213196    | 11.8726521     | 10.8561614     | 9.35958078     | 4.075E-14 | 2.23917  | up        | hypothetical protein MIMGU_mgv1a013935mg [Erythranthe                                                 |
| c41378.graph_c0 | 33.4580047    | 34.2013471    | 33.0538524    | 33.6878306     | 32.8917671     | 33.1091368     | 2.313E-37 | -1.10508 | down      | PREDICTED: uncharacterized protein At1g47420, mitochondrial [Sesamum indicum]                         |
| c41379.graph_c0 | 20.4963394    | 20.7757512    | 21.1456645    | 12.6409815     | 12.7501604     | 12.63484       | 4.398E-72 | -1.80593 | down      | PREDICTED: uncharacterized protein LOC105169116 [Sesamum indicum]                                     |
| c41381.graph_c0 | 10.1966006    | 9.42319765    | 8.23874046    | 9.93872316     | 9.6890329      | 9.41455575     | 8.301E-22 | -1.02811 | down      | PREDICTED: uncharacterized protein LOC105157976 isoform X1 [Sesamum indicum]                          |
| c41384.graph_c0 | 14.7876585    | 14.0111393    | 13.3258115    | 7.90860027     | 6.77453354     | 6.97734346     | 1.11E-51  | -2.04902 | down      | hypothetical protein MIMGU_mgv1a00012/mg [Erythranthe                                                 |
| c41385.graph_c0 | 8.48109528    | 9.81132005    | 9.07124256    | 6.75457512     | 6.39868645     | 6.05381041     | 1.915E-21 | -1.60195 | down      | PREDICTED: uncharacterized protein LOC105163010 [Sesamum indicum]                                     |
| c41389.graph_c0 | 45.3886524    | 47.1378811    | 46.7824852    | 206.107593     | 214.515936     | 215.849601     | 4.208E-37 | 1.10106  | up        | unnamed protein product [Vitis vinifera]                                                              |
| c41394.graph_c1 | 0.21726735    | 0.36247486    | 0.09306572    | 2.42126613     | 2.23370187     | 2.01868411     | 1.302E-05 | 2.22843  | up        | PREDICTED: squamosa promoter-binding-like protein 6, partial [Sesamum indicum]                        |
| c41407.graph_c0 | 2.27192133    | 1.98540948    | 2.87316744    | 14.0484692     | 13.4417311     | 13.0460747     | 2.164E-16 | 1.41264  | up        | PREDICTED: paramyosin [Sesamum indicum]                                                               |
| c41408.graph_c0 | 3.45172411    | 2.4149111     | 2.52781628    | 0.16185117     | 0.07306822     | 0.33017309     | 1.519E-31 | -4.97425 | down      | PREDICTED: probable glycosyltransferase At3g07620 isoform X1 [Sesamum indicum]                        |
| c41415.graph_c0 | 33.5689255    | 33.128597     | 32.946264     | 31.6929241     | 33.7112668     | 33.639173      | 1.374E-39 | -1.09898 | down      | PREDICTED: nuclear pore complex protein NUP50A-like [Sesamum indicum]                                 |
| c41418.graph_c0 | 0.91054134    | 0.76562061    | 0.79565553    | 4.07654136     | 3.65683376     | 4.49283304     | 6.446E-05 | 1.21796  | up        | PREDICTED: kirola-like [Sesamum indicum]                                                              |
| c41421.graph_c0 | 28.9822446    | 28.9454807    | 30.8249798    | 10.3648885     | 12.7655423     | 13.1347139     | 2.416E-88 | -2.38215 | down      | hypothetical protein MIMGU_mgv1a01391/mg [Erythranthe                                                 |
| c41425.graph_c0 | 0.37406076    | 0.65526182    | 0.90128041    | 7.13646164     | 7.60953251     | 6.98795331     | 2.457E-15 | 2.39231  | up        | PREDICTED: uncharacterized protein LOC105166018 [Sesamum indicum]                                     |
| c41426.graph_c0 | 7.68078262    | 9.09622248    | 7.61110577    | 3.83295058     | 2.99935567     | 2.83894963     | 1.846E-43 | -2.42495 | down      | PREDICTED: uncharacterized protein LOC105177245 [Sesamum indicum]                                     |
| c41428.graph_c0 | 1.54016858    | 1.71201609    | 1.85260229    | 14.1354978     | 13.9793952     | 13.8445272     | 1.309E-81 | 1.9463   | up        | PREDICTED: uncharacterized protein LOC105169752 [Sesamum indicum]                                     |
| c41431.graph_c0 | 61.0710242    | 61.4519623    | 64.2471529    | 28.6748707     | 27.3931502     | 28.3876057     | 3.54E-137 | -2.23611 | down      | PREDICTED: uncharacterized protein LOC105163802 [Sesamum indicum]                                     |
| c41432.graph_c1 | 0.33516741    | 0.047929      | 0.06152906    | 4.14116163     | 3.36203053     | 4.17424915     | 5.946E-14 | 3.64427  | up        | -                                                                                                     |
| c41433.graph_c0 | 2.81908084    | 2.55568639    | 2.39230316    | 13.5304169     | 13.368558      | 12.6494989     | 2.909E-09 | 1.25926  | up        | PREDICTED: palmitoyl-monogalactosyldiacylglycerol delta-7 desaturase, chloroplastic [Sesamum indicum] |

| #ID             | 0 h-1<br>FPKM | 0 h-2<br>FPKM | 0 h-3<br>FPKM | 28 h-1<br>FPKM | 28 h-2<br>FPKM | 28 h-3<br>FPKM | FDR       | log2FC   | regulated | nr_annotation                                                                                          |
|-----------------|---------------|---------------|---------------|----------------|----------------|----------------|-----------|----------|-----------|--------------------------------------------------------------------------------------------------------|
| c41436.graph_c0 | 2.70928434    | 1.94556327    | 2.49762483    | 14.297322      | 14.416496      | 13.7972057     | 1.484E-11 | 1.48082  | up        | PREDICTED: protein N-lysine methyltransferase METTL21A [Sesamum indicum]                               |
| c41437.graph_c0 | 0.83189641    | 1.13806355    | 1.38972577    | 5.11909496     | 5.40453799     | 4.35803944     | 6.009E-06 | 1.04981  | up        | PREDICTED: pentatricopeptide repeat-containing protein At3g57430, chloroplastic-like [Sesamum indicum] |
| c41438.graph_c0 | 1.53207402    | 1.60663712    | 1.82814893    | 10.2866428     | 10.2932624     | 10.1028668     | 4.812E-14 | 1.53412  | up        | -                                                                                                      |
| c41439.graph_c0 | 23.4714234    | 24.4408261    | 20.499516     | 20.6331399     | 21.0635323     | 20.3074146     | 3.257E-36 | -1.2307  | down      | PREDICTED: mediator of RNA polymerase II transcription subunit 14 [Sesamum indicum]                    |
| c41444.graph_c0 | 0.10022092    | 0.20064255    | 0.25757569    | 2.95001941     | 2.79512629     | 3.09071533     | 1.076E-09 | 2.88406  | up        | PREDICTED: squamosa promoter-binding-like protein 6 [Sesamum indicum]                                  |
| c41445.graph_c0 | 0.76752863    | 0.7387473     | 0.53108713    | 0.10727604     | 0.11623224     | 0.0700291      | 8.181E-18 | -3.88323 | down      | unnamed protein product [Coffea canephora]                                                             |
| c41446.graph_c0 | 3.13854744    | 2.29188877    | 3.10751497    | 32.2716472     | 31.7043304     | 30.6053312     | 2.542E-92 | 2.37812  | up        | PREDICTED: ADP-ribosylation factor GTPase-activating protein AGD3-like [Sesamum indicum]               |
| c41448.graph_c0 | 0.72569242    | 0.90075967    | 0.59682783    | 8.81861398     | 9.06720966     | 9.41666649     | 3.639E-29 | 2.53098  | up        | PREDICTED: phosphoacetylglucosamine mutase [Sesamum indicum]                                           |
| c41449.graph_c0 | 15.8612738    | 17.3102489    | 13.7496237    | 5.06569652     | 6.89785877     | 7.26167175     | 1.039E-40 | -2.375   | down      | PREDICTED: sodium-coupled neutral amino acid transporter 2-like [Sesamum indicum]                      |
| c41451.graph_c0 | 1.86128018    | 0.95429325    | 1.34175197    | 0              | 0              | 0              | 2.327E-17 | -Inf     | down      | hypothetical protein GUITHDRAFT_154386 [Guillardia theta CCMP2712]                                     |
| c41452.graph_c0 | 0.0862945     | 0             | 0.05544593    | 1.19164862     | 1.44403409     | 0.92119788     | 9.294E-10 | 3.56029  | up        | PREDICTED: uncharacterized protein LOC105161758 [Sesamum indicum]                                      |
| c41454.graph_c0 | 1.52325973    | 1.28653738    | 1.16223538    | 8.96056144     | 10.0897553     | 11.0099635     | 1.948E-13 | 1.8331   | up        | PREDICTED: BURP domain-containing protein 3-like [Sesamum indicum]                                     |
| c41459.graph_c0 | 1.96138289    | 2.39964623    | 1.40025259    | 1.82150005     | 1.68039689     | 1.93869022     | 0.0003346 | -1.16802 | down      | PREDICTED: heptahelical transmembrane protein 4-like [Sesamum indicum]                                 |
| c41459.graph_c1 | 1.80680798    | 1.29186944    | 1.76900555    | 1.12558082     | 1.1292155      | 1.58180042     | 0.0004503 | -1.43288 | down      | hypothetical protein MIMGU_mgv1a007578mg [Erythranthe guittardii]                                      |
| c41464.graph_c0 | 0.42753476    | 0.53495359    | 0.85843608    | 8.99174354     | 10.7840202     | 9.79348377     | 5.289E-42 | 2.92164  | up        | PREDICTED: nucleobase-ascorbate transporter 12 [Sesamum indicum]                                       |
| c41482.graph_c0 | 22.3336105    | 23.8194916    | 20.8776458    | 10.0731274     | 9.34963463     | 10.1130151     | 4.6E-142  | -2.27158 | down      | PREDICTED: autophagy-related protein 18g-like [Sesamum indicum]                                        |
| c41483.graph_c0 | 0             | 0             | 0             | 1.72125606     | 2.94467276     | 1.84806696     | 4.902E-09 | Inf      | up        | PREDICTED: uncharacterized protein LOC105112702 isoform X1 [Populus euphratica]                        |
| c41486.graph_c0 | 1250.05621    | 1227.48123    | 1331.97371    | 58.4288292     | 55.0684394     | 61.399918      | 0         | -5.53606 | down      | glucose and ribitol dehydrogenase homolog 1-like precursor [Sesamum indicum]                           |
| c41487.graph_c0 | 6.01185273    | 7.28036346    | 6.15876532    | 0.94720823     | 0.57935628     | 0.77291418     | 2.556E-74 | -4.17024 | down      | hypothetical protein JCGZ_16285 [Jatropha curcas]                                                      |
| c41489.graph_c0 | 397.669757    | 375.472013    | 386.714498    | 124.686956     | 129.569242     | 133.011794     | 6E-192    | -2.6727  | down      | PREDICTED: protein DJ-1 homolog D [Sesamum indicum]                                                    |
| c41491.graph_c0 | 33.9097872    | 36.7992544    | 33.6127894    | 35.6305483     | 31.2652431     | 31.8984349     | 8.118E-46 | -1.16884 | down      | PREDICTED: CTD small phosphatase-like protein 2 isoform X2 [Sesamum indicum]                           |
| c41493.graph_c0 | 28.24164      | 27.478362     | 26.7106364    | 21.4563669     | 23.4503318     | 22.2649178     | 4.933E-49 | -1.38534 | down      | PREDICTED: ethylene-responsive transcription factor 3-like [Sesamum indicum]                           |



| #ID             | 0 h-1<br>FPKM | 0 h-2<br>FPKM | 0 h-3<br>FPKM | 28 h-1<br>FPKM | 28 h-2<br>FPKM | 28 h-3<br>FPKM | FDR       | log2FC   | regulated | nr_annotation                                                                                        |
|-----------------|---------------|---------------|---------------|----------------|----------------|----------------|-----------|----------|-----------|------------------------------------------------------------------------------------------------------|
| c41493.graph_c1 | 10.7867313    | 10.9230853    | 9.50954919    | 11.212643      | 8.3131748      | 9.81889527     | 3.661E-07 | -1.17791 | down      | PREDICTED: ethylene-responsive transcription factor 3-like [Sesamum indicum]                         |
| c41495.graph_c0 | 3.38945407    | 3.21659625    | 2.09294232    | 1.08775082     | 1.21322807     | 1.22697065     | 1.493E-10 | -2.38653 | down      | ATP binding protein, putative [Ricinus communis]                                                     |
| c41499.graph_c0 | 2.76138325    | 2.33225017    | 1.7742434     | 0.06271742     | 0              | 0.1023538      | 2.734E-28 | -6.45681 | down      | -                                                                                                    |
| c41499.graph_c1 | 99.2115304    | 106.476872    | 99.9499896    | 18.7891932     | 17.8438892     | 18.994873      | 0         | -3.54816 | down      | PREDICTED: UV-stimulated scaffold protein A homolog [Sesamum indicum]                                |
| c41502.graph_c0 | 15.8935714    | 16.3117953    | 15.7756777    | 16.7295502     | 15.2970276     | 14.1712212     | 3.25E-26  | -1.1455  | down      | PREDICTED: MORN repeat-containing protein 1-like [Sesamum indicum]                                   |
| c41503.graph_c0 | 0.73076411    | 0.27431095    | 0.3521478     | 2.7883545      | 2.27784909     | 2.54614051     | 0.0030126 | 1.40559  | up        | -                                                                                                    |
| c41504.graph_c0 | 0.48058256    | 1.30574458    | 0.44111973    | 4.39100684     | 6.66784986     | 4.88594417     | 0.0004092 | 1.7521   | up        | PREDICTED: uncharacterized protein LOC105130684 isoform X1 [Populus euphratica]                      |
| c41507.graph_c0 | 0.722804      | 0.28311956    | 0.60575984    | 3.95139356     | 4.53700774     | 4.43574891     | 2.501E-10 | 1.91347  | up        | PREDICTED: endoglucanase 6 [Sesamum indicum]                                                         |
| c41510.graph_c0 | 1.12753426    | 1.12866332    | 0.94250537    | 7.22420141     | 6.58024594     | 6.49866106     | 1.138E-28 | 1.57772  | up        | PREDICTED: 1-phosphatidylinositol-3-phosphate 5-kinase FAB1B-like [Sesamum indicum]                  |
| c41514.graph_c0 | 0.25111178    | 0.4608326     | 0.26890715    | 2.0684081      | 1.86757858     | 1.38995633     | 0.0023751 | 1.35008  | up        | PREDICTED: shugoshin-1-like isoform X2 [Sesamum indicum]                                             |
| c41516.graph_c0 | 16.7274208    | 17.5464099    | 13.9429609    | 6.48195158     | 6.45943037     | 7.04416798     | 3.773E-45 | -2.35824 | down      | PREDICTED: LOW QUALITY PROTEIN: ubiquitin carboxyl-terminal hydrolase 22 [Sesamum indicum]           |
| c41519.graph_c0 | 0             | 0             | 0.06244676    | 1.20083621     | 0.92479508     | 1.35452969     | 1.107E-10 | 4.67163  | up        | PREDICTED: solute carrier family 35 member F1-like isoform X1 [Sesamum indicum]                      |
| c41521.graph_c0 | 77.8841589    | 79.4215844    | 77.1180402    | 57.4944955     | 59.8748807     | 56.3426745     | 2.411E-75 | -1.52301 | down      | PREDICTED: uncharacterized protein LOC105162845 [Sesamum indicum]                                    |
| c41523.graph_c0 | 4.16878059    | 4.62005731    | 3.63513978    | 1.94775795     | 1.46553568     | 1.32446215     | 1.26E-10  | -2.48024 | down      | -                                                                                                    |
| c41525.graph_c0 | 0.30398167    | 0.30428606    | 0             | 4.19771042     | 5.38598691     | 3.0647398      | 1.419E-06 | 3.30555  | up        | PREDICTED: LOW QUALITY PROTEIN: LOB domain-containing protein 6 [Sesamum indicum]                    |
| c41525.graph_c1 | 18.0441911    | 18.0622596    | 18.057522     | 6.80092623     | 5.97293734     | 6.11770848     | 8.55E-123 | -2.61023 | down      | PREDICTED: LOW QUALITY PROTEIN: LOB domain-containing protein 56 [Sesamum indicum]                   |
| c41527.graph_c0 | 54.6246814    | 55.2877734    | 60.5296586    | 50.4129694     | 48.8086559     | 48.9763999     | 2.029E-27 | -1.29369 | down      | PREDICTED: phosphoribosylaminoimidazole-succinocarboxamide synthase, chloroplastic [Sesamum indicum] |
| c41530.graph_c0 | 1.55962074    | 1.40506422    | 1.5031308     | 0.68011402     | 0.51173266     | 0.32373103     | 2.831E-10 | -2.65234 | down      | retrotransposon protein, putative, unclassified [Oryza sativa Japonica Group]                        |
| c41535.graph_c0 | 260.403141    | 293.444909    | 249.876169    | 110.865898     | 106.41278      | 108.046186     | 9.046E-73 | -2.39447 | down      | PREDICTED: adagio protein 1-like [Sesamum indicum]                                                   |
| c41538.graph_c0 | 3.03051511    | 3.981534      | 2.79905105    | 19.8459916     | 19.7213345     | 18.7028588     | 6.526E-26 | 1.48127  | up        | PREDICTED: allantoate deiminase [Sesamum indicum]                                                    |
| c41539.graph_c0 | 0.80211589    | 0.94890438    | 1.26501219    | 14.6273277     | 14.3076976     | 12.811503      | 4.97E-75  | 2.69411  | up        | PREDICTED: poly [ADP-ribose] polymerase 1 [Sesamum indicum]                                          |
| c41543.graph_c0 | 155.144725    | 159.08041     | 169.199722    | 14.465702      | 13.9988978     | 18.1598379     | 3.52E-196 | -4.46454 | down      | Gibberellin 2-beta-dioxygenase 8 GN=GA2OX8 OS=Arabidopsis thaliana                                   |
| c41543.graph_c1 | 99.0368586    | 94.355885     | 93.6487752    | 12.3738203     | 10.3549069     | 11.8823702     | 0         | -4.14152 | down      | PREDICTED: gibberellin 2-beta-dioxygenase 8 [Sesamum indicum]                                        |

| #ID             | 0 h-1<br>FPKM | 0 h-2<br>FPKM | 0 h-3<br>FPKM | 28 h-1<br>FPKM | 28 h-2<br>FPKM | 28 h-3<br>FPKM | FDR       | log2FC   | regulated | nr_annotation                                                                                                                                                                            |
|-----------------|---------------|---------------|---------------|----------------|----------------|----------------|-----------|----------|-----------|------------------------------------------------------------------------------------------------------------------------------------------------------------------------------------------|
| c41545.graph_c0 | 2.96274525    | 2.04775352    | 2.49283895    | 55.1912879     | 61.4979598     | 56.2474857     | 3.84E-176 | 3.43718  | up        | PREDICTED: 60S ribosomal protein L5-like [Nicotiana sylvestris]                                                                                                                          |
| c41549.graph_c0 | 1.58246896    | 1.32004463    | 1.52515145    | 0.7028568      | 1.413458       | 1.14705083     | 1.721E-05 | -1.53094 | down      | PREDICTED: interferon-activable protein 203 isoform X1 [Sesamum indicum]                                                                                                                 |
| c41551.graph_c0 | 34.8039768    | 34.1373748    | 29.7162706    | 14.599989      | 16.2481005     | 15.3766903     | 3.846E-28 | -2.18241 | down      | -                                                                                                                                                                                        |
| c41551.graph_c1 | 41.1516742    | 39.9078984    | 38.7656497    | 18.3931121     | 19.194618      | 17.1620413     | 2.9E-158  | -2.22032 | down      | PREDICTED: uncharacterized protein LOC105172898 isoform X1 [Sesamum indicum]                                                                                                             |
| c41556.graph_c0 | 4.00111236    | 4.14564936    | 4.41996144    | 4.84664234     | 4.46819127     | 3.20548615     | 5.048E-05 | -1.09871 | down      | transcription factor, putative [Ricinus communis]                                                                                                                                        |
| c41558.graph_c0 | 0.21568756    | 0.17991962    | 0.27716706    | 1.51535129     | 1.65130017     | 1.53498324     | 9.7E-05   | 1.71006  | up        | PREDICTED: NAC domain-containing protein 8-like [Sesamum indicum]                                                                                                                        |
| c41561.graph_c0 | 15.4320969    | 17.6043775    | 16.3885183    | 7.57606291     | 10.5855387     | 9.04852197     | 3.164E-44 | -1.95235 | down      | PREDICTED: probable transcription factor GLK1 [Sesamum indicum]                                                                                                                          |
| c41564.graph_c0 | 0.70928964    | 0.75018856    | 0.46433136    | 0.02917968     | 0.02634651     | 0.03174717     | 7.675E-25 | -5.54677 | down      | Strong similarity to gi 3600044 T12H20.12 protease homolog from Arabidopsis thaliana BAC gb AF080119 and is a member of the reverse transcriptase family PF 00078 [Arabidopsis thaliana] |
| c41567.graph_c0 | 3.7865713     | 6.06458077    | 4.91711398    | 31.4024325     | 31.7537741     | 30.139081      | 2.994E-35 | 1.56681  | up        | chloroplast omega-3 desaturase [Portulaca oleracea]                                                                                                                                      |
| c41570.graph_c0 | 31.9958752    | 32.5131857    | 28.8746219    | 26.7778143     | 25.9593819     | 28.7218781     | 4.664E-53 | -1.28581 | down      | PREDICTED: RNA polymerase-associated protein LEO1 [Sesamum indicum]                                                                                                                      |
| c41572.graph_c0 | 4.56175876    | 4.76272782    | 4.22319055    | 33.0119993     | 33.4762525     | 30.6028866     | 9.467E-36 | 1.75147  | up        | PREDICTED: ER lumen protein-retaining receptor-like [Sesamum indicum]                                                                                                                    |
| c41575.graph_c0 | 3.22592004    | 2.95432901    | 2.55782158    | 29.4319629     | 30.0725021     | 30.5562573     | 1.452E-89 | 2.27787  | up        | PREDICTED: glycosylphosphatidylinositol anchor attachment 1 protein [Sesamum indicum]                                                                                                    |
| c41577.graph_c0 | 7.76203014    | 5.06346689    | 6.94853927    | 35.8133742     | 36.6285243     | 34.5508764     | 4.523E-16 | 1.34548  | up        | PREDICTED: ergosterol biosynthetic protein 28 [Sesamum indicum]                                                                                                                          |
| c41581.graph_c0 | 15.1052992    | 15.7949419    | 14.0350242    | 3.14252869     | 3.22432814     | 2.7640916      | 4.85E-176 | -3.38915 | down      | PREDICTED: trehalose-phosphate phosphatase A-like isoform X2 [Sesamum indicum]                                                                                                           |
| c41582.graph_c0 | 5.75070916    | 7.40431141    | 5.35907977    | 26.7365645     | 37.651287      | 26.2426645     | 7.775E-05 | 1.20119  | up        | PREDICTED: lysine histidine transporter-like 8 [Sesamum indicum]                                                                                                                         |
| c41586.graph_c0 | 0.03510107    | 0.21081731    | 0.09021253    | 6.68394889     | 5.78160218     | 7.76473205     | 2.081E-29 | 4.82006  | up        | PREDICTED: protein Brevis radix-like 4 [Sesamum indicum]                                                                                                                                 |
| c41597.graph_c0 | 31.5110882    | 27.7158806    | 34.7495647    | 29.7870015     | 30.9161875     | 32.0911891     | 3.137E-09 | -1.11032 | down      | PREDICTED: ninja-family protein AFP1-like [Sesamum indicum]                                                                                                                              |
| c41598.graph_c0 | 4.86810013    | 4.00575047    | 3.55196605    | 24.4968942     | 24.0405606     | 22.7539988     | 3.459E-23 | 1.43319  | up        | hypothetical protein MIMGU_mgv1a00612/mg [Erythranthe outtata]                                                                                                                           |
| c41602.graph_c0 | 3.19864573    | 3.18681654    | 3.35778044    | 15.7821551     | 15.728002      | 14.8641529     | 4.108E-27 | 1.15936  | up        | PREDICTED: pentatricopeptide repeat-containing protein At1g63080, mitochondrial-like [Sesamum indicum]                                                                                   |
| c41604.graph_c0 | 13.4411416    | 13.8476272    | 13.1519144    | 9.24577782     | 9.99707208     | 8.69322706     | 2.746E-75 | -1.6244  | down      | Calcium-transporting ATPase 12, plasma membrane-type [Morus notabilis]                                                                                                                   |
| c41605.graph_c1 | 25.130711     | 24.4762786    | 23.2095517    | 21.6953906     | 22.4600569     | 22.183401      | 3.372E-52 | -1.22399 | down      | PREDICTED: WD repeat-containing protein LWD1 [Sesamum indicum]                                                                                                                           |
| c41609.graph_c1 | 1.5862564     | 1.26567339    | 1.15214042    | 6.06516187     | 5.76290936     | 5.35814095     | 9.658E-07 | 1.0144   | up        | PREDICTED: protein transport protein SEC23 [Sesamum indicum]                                                                                                                             |
| c41610.graph_c0 | 1.06087295    | 1.00293885    | 0.83310562    | 6.12545543     | 5.41468302     | 4.85850842     | 4.15E-05  | 1.41274  | up        | PREDICTED: uncharacterized protein LOC105179150 [Sesamum indicum]                                                                                                                        |

| #ID             | 0 h-1<br>FPKM | 0 h-2<br>FPKM | 0 h-3<br>FPKM | 28 h-1<br>FPKM | 28 h-2<br>FPKM | 28 h-3<br>FPKM | FDR       | log2FC   | regulated | nr_annotation                                                                                       |
|-----------------|---------------|---------------|---------------|----------------|----------------|----------------|-----------|----------|-----------|-----------------------------------------------------------------------------------------------------|
| c41614.graph_c0 | 12.8006014    | 12.1658096    | 13.0050261    | 10.1430606     | 11.5842547     | 10.5239582     | 5.289E-23 | -1.32675 | down      | PREDICTED: zinc finger CCCH domain-containing protein 44-like [Sesamum indicum]                     |
| c41615.graph_c0 | 2.68720295    | 2.07855428    | 1.80506205    | 16.512096      | 14.968991      | 16.3713131     | 4.509E-29 | 1.77875  | up        | hypothetical protein MIMGU_mgv1a003582mg [Erythranthe guttata]                                      |
| c41620.graph_c0 | 0.30594418    | 0.91875162    | 1.17945116    | 6.67075406     | 6.62537202     | 6.7133797      | 3.529E-05 | 1.95431  | up        | -                                                                                                   |
| c41627.graph_c0 | 0.67614824    | 0.48881827    | 0.28962575    | 2.9212227      | 3.17989848     | 2.71785656     | 6.955E-05 | 1.51839  | up        | hypothetical protein MIMGU_mgv1a021778mg, partial [Erythranthe guttata]                             |
| c41630.graph_c0 | 70.7283071    | 67.3570377    | 70.6141754    | 374.33959      | 386.619669     | 374.874879     | 8.214E-66 | 1.35348  | up        | unknown [Lotus japonicus]                                                                           |
| c41639.graph_c0 | 6.0705277     | 5.55016774    | 5.52239696    | 40.1668967     | 41.6606386     | 43.0862647     | 3.215E-91 | 1.77592  | up        | PREDICTED: alpha-1,4 glucan phosphorylase L-1 isozyme, chloroplastic/amyloplastic [Sesamum indicum] |
| c41640.graph_c0 | 1186.59981    | 1029.49954    | 1151.16288    | 447.995136     | 605.119625     | 547.610334     | 6.095E-53 | -2.16347 | down      | PREDICTED: ubiquitin carboxyl-terminal hydrolase isozyme L3 [Sesamum indicum]                       |
| c41642.graph_c0 | 0.19054544    | 0.25431499    | 0.24485844    | 3.92380764     | 4.50147864     | 4.10583123     | 7.965E-11 | 3.09022  | up        | PREDICTED: protein polybromo-1-like [Sesamum indicum]                                               |
| c41645.graph_c0 | 0             | 0.06579297    | 0             | 5.44579352     | 5.95220748     | 5.22332358     | 2.909E-37 | 6.89872  | up        | PREDICTED: MATE efflux family protein 5-like isoform X3 [Sesamum indicum]                           |
| c41646.graph_c0 | 7.4233126     | 7.43074592    | 6.88662476    | 6.63583309     | 6.59068862     | 6.38003        | 1.003E-14 | -1.23878 | down      | PREDICTED: protein PHK1-LIKE 1-like isoform X1 [Sesamum indicum]                                    |
| c41648.graph_c0 | 3.74827025    | 2.98237771    | 3.21111711    | 1.32718469     | 1.89208949     | 1.25396743     | 6.652E-10 | -2.24273 | down      | hypothetical protein VITISV_011460 [Vitis vinifera]                                                 |
| c41653.graph_c0 | 18.8351338    | 19.0782242    | 18.9025445    | 5.11482017     | 5.48794421     | 5.77890206     | 5.63E-201 | -2.88441 | down      | hypothetical protein MIMGU_mgv1a026895mg [Erythranthe guttata]                                      |
| c41653.graph_c1 | 9.52065653    | 9.3408485     | 10.0468089    | 2.1537698      | 2.48253472     | 2.76706243     | 2.524E-48 | -3.05581 | down      | PREDICTED: uncharacterized protein LOC105160086 [Sesamum indicum]                                   |
| c41654.graph_c0 | 7.4687153     | 7.35998382    | 6.98685015    | 48.9946006     | 47.132524      | 47.9888029     | 9.598E-76 | 1.63412  | up        | PREDICTED: coatomer subunit beta-1 [Sesamum indicum]                                                |
| c41654.graph_c1 | 0.19815456    | 0.06611766    | 0             | 1.44017594     | 1.43037823     | 1.56689574     | 3.002E-07 | 3.00545  | up        | PREDICTED: coatomer subunit beta-1 [Sesamum indicum]                                                |
| c41657.graph_c0 | 16.1589179    | 15.4092761    | 14.6575406    | 8.74497009     | 8.58050264     | 8.45574542     | 8.082E-84 | -1.93186 | down      | PREDICTED: cysteine synthase 2 [Sesamum indicum]                                                    |
| c41660.graph_c0 | 27.2929906    | 29.6002339    | 27.929079     | 18.7702174     | 18.4930567     | 16.2321196     | 1.083E-74 | -1.75627 | down      | hypothetical protein MIMGU_mgv1a007698mg [Erythranthe guttata]                                      |
| c41662.graph_c0 | 287.467525    | 307.739525    | 280.128695    | 115.782539     | 107.834748     | 120.428744     | 1.8E-143  | -2.43682 | down      | PREDICTED: uncharacterized protein LOC105179373 [Sesamum indicum]                                   |
| c41665.graph_c0 | 1.03419893    | 1.03523452    | 1.52833455    | 20.3697101     | 23.7194925     | 23.0309213     | 5.836E-52 | 3.12559  | up        | NAD(P)-binding Rossmann-fold superfamily protein [Theobroma cacao]                                  |
| c41667.graph_c0 | 2.87274291    | 2.95549785    | 2.51233098    | 1.37259632     | 1.40515106     | 1.46707813     | 4.985E-37 | -2.06292 | down      | PREDICTED: phospholipase A I-like [Sesamum indicum]                                                 |
| c41668.graph_c0 | 51.5986078    | 57.7922768    | 57.4070139    | 52.6273781     | 58.7494462     | 56.6905415     | 4.014E-20 | -1.08069 | down      | PREDICTED: NASP-related protein sim5 isoform X1 [Sesamum indicum]                                   |
| c41676.graph_c0 | 5.00707781    | 6.00433313    | 5.61775855    | 3.82384196     | 3.60268254     | 3.4518418      | 6.68E-28  | -1.70404 | down      | PREDICTED: uncharacterized protein LOC105161819 isoform X2 [Sesamum indicum]                        |
| c41679.graph_c0 | 2.24829945    | 1.45623874    | 1.78447735    | 1.4898701      | 0.9546673      | 1.2941555      | 9.07E-06  | -1.64178 | down      | hypothetical protein MIMGU_mgv1a009883mg [Erythranthe guttata]                                      |
| c41683.graph_c0 | 39.564922     | 44.783998     | 40.9695108    | 170.975909     | 187.987238     | 184.05682      | 1.466E-36 | 1.02481  | up        | PREDICTED: histone deacetylase HDT1-like isoform X2 [Sesamum indicum]                               |

| #ID             | 0 h-1<br>FPKM | 0 h-2<br>FPKM | 0 h-3<br>FPKM | 28 h-1<br>FPKM | 28 h-2<br>FPKM | 28 h-3<br>FPKM | FDR       | log2FC   | regulated | nr_annotation                                                                       |
|-----------------|---------------|---------------|---------------|----------------|----------------|----------------|-----------|----------|-----------|-------------------------------------------------------------------------------------|
| c41686.graph_c0 | 2.0055034     | 2.14134572    | 1.34011866    | 44.3689883     | 48.8523545     | 45.1964461     | 1.95E-193 | 3.57119  | up        | PREDICTED: BTB/POZ domain-containing protein NPY4-like [Sesamum indicum]            |
| c41688.graph_c0 | 19.395995     | 17.6853305    | 17.8503065    | 166.185206     | 178.026444     | 168.064599     | 1.24E-121 | 2.13134  | up        | PREDICTED: 60S ribosomal protein L18a-2-like [Sesamum indicum]                      |
| c41690.graph_c0 | 14.8190637    | 15.8464558    | 13.8436068    | 73.1873257     | 65.6830131     | 66.9490812     | 1.289E-29 | 1.11967  | up        | PREDICTED: uncharacterized protein LOC105167598 [Sesamum indicum]                   |
| c41690.graph_c1 | 35.2247556    | 35.4659258    | 32.7759736    | 162.576642     | 155.700188     | 159.559416     | 2.961E-41 | 1.11782  | up        | PREDICTED: uncharacterized protein LOC105167598 [Sesamum indicum]                   |
| c41692.graph_c0 | 34.778187     | 33.7123665    | 31.5037365    | 28.3547649     | 26.0827281     | 24.5380509     | 1.496E-55 | -1.43018 | down      | PREDICTED: protein kinase 2B, chloroplastic-like isoform X2 [Sesamum indicum]       |
| c41697.graph_c0 | 1.40906561    | 1.07859974    | 1.27814478    | 0.39156794     | 0.4351374      | 0.46698528     | 1.42E-11  | -2.63089 | down      | -                                                                                   |
| c41702.graph_c1 | 1.8885449     | 1.30876338    | 1.96015209    | 1.84770863     | 1.66830765     | 1.68002545     | 0.0053438 | -1.08147 | down      | -                                                                                   |
| c41705.graph_c0 | 2.503111      | 2.21329545    | 1.60829837    | 15.5090777     | 15.070939      | 13.5707165     | 2.003E-35 | 1.71757  | up        | PREDICTED: putative phospholipid:diacylglycerol acyltransferase 2 [Sesamum indicum] |
| c41709.graph_c0 | 33.9643868    | 32.2742311    | 32.3710495    | 24.0200698     | 22.358994      | 20.7812992     | 2.578E-60 | -1.64462 | down      | PREDICTED: B-box zinc finger protein 20 [Sesamum indicum]                           |
| c41712.graph_c0 | 18.4695199    | 16.9033274    | 18.4786644    | 14.6380515     | 16.448841      | 15.2827398     | 1.69E-30  | -1.30681 | down      | PREDICTED: syntaxin-61 [Vitis vinifera]                                             |
| c41713.graph_c0 | 3.26564156    | 3.6899078     | 2.35257139    | 15.12175       | 14.9036071     | 14.4079887     | 3.939E-17 | 1.1687   | up        | PREDICTED: poly(A)-specific ribonuclease PARN [Sesamum indicum]                     |
| c41715.graph_c0 | 17.3394242    | 21.0503112    | 19.6436759    | 8.87194426     | 10.1952249     | 10.217474      | 5.801E-30 | -2.0781  | down      | Vesicle-associated protein 4-2 [Triticum urartu]                                    |
| c41722.graph_c0 | 1.39038517    | 1.06281186    | 1.03953454    | 9.42543231     | 9.42269002     | 8.75553268     | 6.977E-23 | 1.89474  | up        | PREDICTED: uncharacterized protein LOC105159385 [Sesamum indicum]                   |
| c41723.graph_c0 | 0.62676782    | 0.84882912    | 0.94755467    | 4.86346589     | 5.20176059     | 5.4444549      | 6.805E-15 | 1.58349  | up        | PREDICTED: katanin p80 WD40 repeat-containing subunit B1 homolog [Sesamum indicum]  |
| c41725.graph_c0 | 0             | 0             | 0             | 1.36025778     | 1.22818523     | 1.86798018     | 9.453E-13 | Inf      | up        | similar to AHNAK nucleoprotein [Ectocarpus siliculosus]                             |
| c41730.graph_c0 | 2.08370984    | 1.92738144    | 2.03365795    | 1.66778813     | 2.00780841     | 2.31509679     | 7.949E-06 | -1.10241 | down      | PREDICTED: vacuolar amino acid transporter 1-like isoform X1 [Sesamum indicum]      |
| c41730.graph_c1 | 26.2679998    | 26.5593074    | 28.1988165    | 18.3004085     | 18.3187522     | 19.2419174     | 2.105E-61 | -1.62778 | down      | PREDICTED: glucan endo-1,3-beta-glucosidase 5 [Sesamum indicum]                     |
| c41733.graph_c0 | 230.359054    | 237.078221    | 228.966949    | 50.5194543     | 52.295091      | 47.9734366     | 0         | -3.29815 | down      | PREDICTED: protein NLP5-like [Sesamum indicum]                                      |
| c41734.graph_c0 | 13.216879     | 12.8711572    | 14.4168318    | 7.96772722     | 9.61455907     | 7.5649462      | 1.703E-35 | -1.78039 | down      | hypothetical protein M569_06103, partial [Genlisea aurea]                           |
| c41738.graph_c0 | 8.03273279    | 7.20404582    | 7.15230875    | 3.89703514     | 2.92998463     | 3.27667733     | 4.776E-70 | -2.23714 | down      | hypothetical protein MIMGU_mgv1a0006002mg, partial [Erythranthe guttata]            |
| c41741.graph_c0 | 0.62758698    | 0.80770553    | 0.63365824    | 3.35578856     | 3.67713888     | 3.32317483     | 0.0006095 | 1.23326  | up        | hypothetical protein MIMGU_mgv1a006910mg [Erythranthe guttata]                      |
| c41744.graph_c0 | 38.6832684    | 41.8368653    | 33.7146664    | 6.51872578     | 4.68461489     | 7.12848789     | 8.435E-93 | -3.72666 | down      | hypothetical protein MIMGU_mgv1a021012mg [Erythranthe guttata]                      |
| c41745.graph_c1 | 1.69524092    | 1.08604061    | 1.13279488    | 9.80744699     | 9.1221962      | 9.37010864     | 3.995E-09 | 1.76791  | up        | hypothetical protein MIMGU_mgv1a015492mg [Erythranthe guttata]                      |
| c41751.graph_c0 | 0.69692502    | 0.41857373    | 0.53734575    | 2.93782231     | 3.20138737     | 3.00343739     | 0.0003475 | 1.37932  | up        | PREDICTED: protein DA1-related 2 isoform X2 [Sesamum indicum]                       |
| c41751.graph_c1 | 1.30680877    | 0.96387594    | 0.26515279    | 4.9988478      | 6.27375232     | 6.15931867     | 1.144E-05 | 1.70627  | up        | hypothetical protein MIMGU_mgv1a005034mg [Erythranthe guttata]                      |

| #ID             | 0 h-1<br>FPKM | 0 h-2<br>FPKM | 0 h-3<br>FPKM | 28 h-1<br>FPKM | 28 h-2<br>FPKM | 28 h-3<br>FPKM | FDR       | log2FC   | regulated | nr_annotation                                                                           |
|-----------------|---------------|---------------|---------------|----------------|----------------|----------------|-----------|----------|-----------|-----------------------------------------------------------------------------------------|
| c41753.graph_c2 | 5.67388346    | 3.27142944    | 4.60801621    | 30.8126286     | 29.697486      | 28.5885549     | 1.577E-31 | 1.62756  | up        | PREDICTED: omega-amidase, chloroplastic-like isoform X2 [Nicotiana glauca]              |
| c41755.graph_c0 | 84.0368231    | 91.9837531    | 102.920662    | 18.1955101     | 17.2055613     | 20.1014059     | 3.961E-43 | -3.42168 | down      | PREDICTED: protein PHLOEM PROTEIN 2-LIKE A10 [Sesamum indicum]                          |
| c41756.graph_c0 | 90.7807759    | 91.4953694    | 98.8821281    | 63.8505916     | 65.1743615     | 62.3371163     | 2.133E-48 | -1.64694 | down      | PREDICTED: protein DEHYDRATION-INDUCED 19 homolog 4-like [Sesamum indicum]              |
| c41758.graph_c0 | 3.04789808    | 2.71866839    | 2.75330246    | 0.52638291     | 0.29704651     | 0.42952416     | 1.727E-42 | -3.8543  | down      | PREDICTED: tetrapeptide repeat protein 28-like [Sesamum indicum]                        |
| c41762.graph_c1 | 1.66857317    | 1.33282097    | 1.12623732    | 32.4124139     | 34.6295828     | 30.746358      | 5E-195    | 3.47982  | up        | PREDICTED: lanC-like protein GCR2 [Sesamum indicum]                                     |
| c41766.graph_c0 | 0.13032058    | 0.04348369    | 0.19537829    | 1.24709724     | 1.18302514     | 1.23660294     | 3.03E-07  | 2.21254  | up        | PREDICTED: uncharacterized protein LOC102666559 [Glycine max]                           |
| c41767.graph_c0 | 12.6033443    | 12.4176004    | 11.3064994    | 9.3904792      | 10.3253152     | 9.82499299     | 6.96E-28  | -1.38761 | down      | PREDICTED: uncharacterized protein LOC105162543 [Sesamum indicum]                       |
| c41770.graph_c0 | 17.0092243    | 17.6703419    | 15.4584482    | 18.7466351     | 16.6877945     | 17.5700977     | 5.953E-26 | -1.00891 | down      | PREDICTED: nuclear pore complex protein NUP1 [Sesamum indicum]                          |
| c41771.graph_c0 | 0.44417966    | 0.36378363    | 0.41511887    | 11.5043882     | 11.6063116     | 10.536975      | 9.128E-40 | 3.69129  | up        | PREDICTED: uncharacterized protein LOC105163485 [Sesamum indicum]                       |
| c41771.graph_c1 | 0.22919949    | 0.34414349    | 0.34361882    | 6.08020163     | 6.49256469     | 6.11678821     | 5.285E-22 | 3.25459  | up        | PREDICTED: uncharacterized protein LOC105163485 [Sesamum indicum]                       |
| c41776.graph_c0 | 0.22895205    | 0.08333866    | 0.24071927    | 1.67913766     | 1.52976246     | 1.55531973     | 2.048E-07 | 2.01307  | up        | unnamed protein product [Coffea canephora]                                              |
| c41779.graph_c0 | 2.00547986    | 2.0271693     | 2.22339853    | 12.2035864     | 12.2960371     | 11.2873184     | 4.866E-25 | 1.4238   | up        | gtpase-activating protein [Gossypium arboreum]                                          |
| c41780.graph_c0 | 45.7214835    | 52.4199517    | 48.87585      | 11.5810719     | 11.6389034     | 11.5395206     | 1.18E-103 | -3.17155 | down      | PREDICTED: E3 ubiquitin-protein ligase PUB23-like [Sesamum indicum]                     |
| c41780.graph_c2 | 0             | 0             | 0             | 0.42454032     | 0.67818172     | 0.38639314     | 1.421E-07 | Inf      | up        | PREDICTED: leucine-rich repeat receptor-like protein kinase TDR [Sesamum indicum]       |
| c41782.graph_c0 | 61.3542228    | 65.5060849    | 60.933056     | 40.61765       | 36.9589266     | 36.6441855     | 8.85E-110 | -1.80777 | down      | PREDICTED: protein NLP7 isoform X1 [Sesamum indicum]                                    |
| c41785.graph_c0 | 4.02981264    | 2.72792591    | 3.53924126    | 19.3851585     | 18.7205793     | 20.0133745     | 1.441E-26 | 1.40731  | up        | PREDICTED: heterogeneous nuclear ribonucleoprotein 1 [Sesamum indicum]                  |
| c41786.graph_c0 | 19.7581168    | 21.6576195    | 16.524459     | 17.6534108     | 18.9397277     | 16.3660612     | 1.45E-13  | -1.21829 | down      | PREDICTED: transmembrane protein 45B-like [Sesamum indicum]                             |
| c41791.graph_c0 | 3.84125074    | 4.14471513    | 4.64768244    | 4.45962681     | 3.60104664     | 4.1123874      | 3.243E-10 | -1.14619 | down      | PREDICTED: probable beta-1,3-galactosyltransferase 16 [Sesamum indicum]                 |
| c41797.graph_c0 | 0.90058274    | 0.73967962    | 0.77152298    | 22.3046527     | 22.4726502     | 21.9391001     | 8.55E-129 | 3.70077  | up        | PREDICTED: probable acyl-activating enzyme 17, peroxisomal isoform X1 [Sesamum indicum] |
| c41799.graph_c1 | 0             | 0             | 0             | 0.72477534     | 1.14172644     | 0.90599095     | 1.359E-14 | Inf      | up        | PREDICTED: respiratory burst oxidase homolog protein A [Sesamum indicum]                |
| c41800.graph_c0 | 0.42404402    | 0.12127675    | 0.31137906    | 48.2541795     | 40.1502644     | 44.9076373     | 6.08E-104 | 6.19365  | up        | PREDICTED: acyl-CoA-binding domain-containing protein 3-like [Sesamum indicum]          |
| c41802.graph_c0 | 156.84102     | 162.890867    | 151.74885     | 143.799424     | 151.63473      | 149.384884     | 3.314E-47 | -1.17398 | down      | PREDICTED: uncharacterized protein LOC105170559 [Sesamum indicum]                       |

| #ID             | 0 h-1<br>FPKM | 0 h-2<br>FPKM | 0 h-3<br>FPKM | 28 h-1<br>FPKM | 28 h-2<br>FPKM | 28 h-3<br>FPKM | FDR       | log2FC   | regulated | nr_annotation                                                                                                                                               |
|-----------------|---------------|---------------|---------------|----------------|----------------|----------------|-----------|----------|-----------|-------------------------------------------------------------------------------------------------------------------------------------------------------------|
| c41805.graph_c0 | 2.68317814    | 2.24735637    | 3.02578726    | 16.4765106     | 14.4455343     | 16.6597346     | 6.031E-14 | 1.48795  | up        | hypothetical protein MIMGU_mgv1a014951mg [Erythranthe<br>outfata1<br>PREDICTED: zinc finger SWIM domain-containing protein 7<br>isoform X2 [Vitis vinifera] |
| c41811.graph_c0 | 3.47575943    | 3.17669728    | 3.49551272    | 25.7009517     | 21.66843       | 22.0024305     | 5.942E-17 | 1.68208  | up        | PREDICTED: probable 1-acyl-sn-glycerol-3-phosphate<br>acyltransferase 5 [Sesamum indicum]                                                                   |
| c41812.graph_c0 | 2.14754823    | 2.23926946    | 2.52971079    | 2.43879012     | 2.0551989      | 2.25537053     | 0.0001299 | -1.12778 | down      | PREDICTED: calcineurin B-like protein 10 isoform X3 [Sesamum<br>indicum]                                                                                    |
| c41815.graph_c0 | 2.04901019    | 2.58824486    | 2.38229168    | 11.2399807     | 11.3331913     | 11.4574324     | 2.82E-08  | 1.18567  | up        | --                                                                                                                                                          |
| c41816.graph_c0 | 0             | 0.02992607    | 0.03841771    | 2.62912858     | 1.72644117     | 1.71982399     | 2.939E-12 | 5.36421  | up        | --                                                                                                                                                          |
| c41819.graph_c0 | 13.6183594    | 13.1737778    | 13.4314731    | 15.3318013     | 12.4413382     | 14.5467119     | 3.42E-18  | -1.01676 | down      | PREDICTED: deoxyhypusine synthase [Sesamum indicum]                                                                                                         |
| c41820.graph_c0 | 1.08798645    | 1.01128477    | 0.99864691    | 6.18473429     | 6.06871222     | 6.5445695      | 2.117E-08 | 1.51194  | up        | PREDICTED: uncharacterized protein LOC105162931 [Sesamum<br>indicum]                                                                                        |
| c41824.graph_c0 | 1.03872036    | 0.86646707    | 0.62290517    | 7.80100506     | 7.38439436     | 7.26905476     | 9.281E-16 | 2.06619  | up        | PREDICTED: probable protein phosphatase 2C 53 [Sesamum<br>indicum]                                                                                          |
| c41826.graph_c0 | 0.53388599    | 0.41566046    | 0.22868821    | 9.26949229     | 16.8557484     | 11.2929741     | 2.411E-09 | 3.90681  | up        | hypothetical protein MIMGU_mgv1a008654mg [Erythranthe<br>outfata1<br>PREDICTED: agamous-like MADS-box protein AGL15 [Sesamum<br>indicum]                    |
| c41827.graph_c0 | 0.43734405    | 1.24038228    | 0.65567182    | 4.45002786     | 4.01795793     | 3.37181594     | 0.0023537 | 1.25093  | up        | PREDICTED: uncharacterized protein LOC105164835 isoform X1<br>[Sesamum indicum]                                                                             |
| c41829.graph_c0 | 0.6164017     | 0.41134595    | 0.85810897    | 7.09328904     | 5.96636718     | 6.42779953     | 3.362E-12 | 2.27269  | up        | PREDICTED: putative F-box protein At5g62060 [Sesamum<br>indicum]                                                                                            |
| c41839.graph_c0 | 13.4470995    | 13.961423     | 12.7390175    | 11.7052008     | 10.4866119     | 10.6641267     | 1.401E-35 | -1.37897 | down      | PREDICTED: probable glycosyltransferase At3g07620 [Sesamum<br>indicum]                                                                                      |
| c41840.graph_c0 | 0.98608859    | 0.82914385    | 0.55755167    | 5.41812731     | 5.97918563     | 5.89486352     | 2.053E-09 | 1.78168  | up        | PREDICTED: uncharacterized protein LOC105155405 [Sesamum<br>indicum]                                                                                        |
| c41843.graph_c0 | 13.0686798    | 12.9281641    | 11.3711247    | 10.2882123     | 10.1619977     | 10.3213435     | 3.573E-55 | -1.36891 | down      | PREDICTED: BRCA1-A complex subunit BRE [Sesamum<br>indicum]                                                                                                 |
| c41846.graph_c2 | 3.29210692    | 3.12196118    | 2.95020855    | 16.3395154     | 14.2982358     | 14.1549789     | 5.461E-11 | 1.16853  | up        | hypothetical protein MIMGU_mgv1a012525mg [Erythranthe<br>outfata1<br>PREDICTED: LOW QUALITY PROTEIN: F-box protein SKIP14-<br>like [Sesamum indicum]        |
| c41847.graph_c0 | 19.6602845    | 17.4562457    | 20.8870115    | 140.65632      | 173.406393     | 174.478181     | 2.058E-25 | 1.98286  | up        | PREDICTED: uncharacterized protein LOC105177931 [Sesamum<br>indicum]                                                                                        |
| c41848.graph_c0 | 35.7417674    | 36.5305289    | 33.8320612    | 17.0142137     | 16.1400747     | 17.4252962     | 9.72E-142 | -2.15833 | down      | hypothetical protein MIMGU_mgv1a000152mg [Erythranthe<br>outfata1<br>PREDICTED: PHD finger protein ALFIN-LIKE 4-like [Sesamum<br>indicum]                   |
| c41849.graph_c0 | 3.63086695    | 2.95606221    | 3.48380315    | 0.95000154     | 2.16029029     | 1.78007396     | 3.016E-14 | -2.13272 | down      | PREDICTED: homogentisate solanesyltransferase, chloroplastic<br>[Sesamum indicum]                                                                           |
| c41851.graph_c0 | 1.36077476    | 1.2054313     | 0.71183959    | 9.00605615     | 7.91825807     | 8.58439229     | 1.413E-27 | 1.87727  | up        | PREDICTED: uncharacterized protein LOC105160829 [Sesamum<br>indicum]                                                                                        |
| c41852.graph_c0 | 67.6675866    | 76.6758049    | 67.6320772    | 65.9773013     | 68.5450953     | 67.2438033     | 1.348E-31 | -1.16142 | down      |                                                                                                                                                             |
| c41853.graph_c0 | 1.08130329    | 1.04075582    | 1.22918859    | 6.77070154     | 7.75080207     | 7.64598001     | 2.827E-10 | 1.63338  | up        |                                                                                                                                                             |
| c41856.graph_c0 | 40.1971167    | 40.5042826    | 44.1165282    | 33.1878896     | 32.8527446     | 36.6088313     | 1.194E-30 | -1.37338 | down      |                                                                                                                                                             |

| #ID             | 0 h-1<br>FPKM | 0 h-2<br>FPKM | 0 h-3<br>FPKM | 28 h-1<br>FPKM | 28 h-2<br>FPKM | 28 h-3<br>FPKM | FDR       | log2FC   | regulated | nr_annotation                                                                             |
|-----------------|---------------|---------------|---------------|----------------|----------------|----------------|-----------|----------|-----------|-------------------------------------------------------------------------------------------|
| c41857.graph_c0 | 21.0082901    | 17.8420694    | 19.5724513    | 6.39376987     | 7.0438908      | 7.82589601     | 2.51E-74  | -2.54752 | down      | PREDICTED: monoglyceride lipase-like [Sesamum indicum]                                    |
| c41859.graph_c0 | 10.1745242    | 11.2696818    | 10.8281602    | 1.82963767     | 2.43209825     | 1.72106194     | 2.54E-115 | -3.52373 | down      | PREDICTED: probable microtubule-binding protein TANGLED [Sesamum indicum]                 |
| c41861.graph_c0 | 0.81779185    | 0.70698201    | 0.71651925    | 0.5943664      | 0.78059219     | 0.52908887     | 0.000699  | -1.3259  | down      | PREDICTED: calcium-transporting ATPase 2, plasma membrane-type-like [Sesamum indicum]     |
| c41867.graph_c0 | 1.27438305    | 1.02412073    | 0.9918057     | 0.96535007     | 1.26031627     | 1.26673534     | 0.0001415 | -1.00137 | down      | PREDICTED: regulator of telomere elongation helicase 1 [Sesamum indicum]                  |
| c41869.graph_c0 | 555.445129    | 554.398658    | 554.344749    | 209.903143     | 200.460496     | 205.997689     | 1.51E-167 | -2.52344 | down      | PREDICTED: probable 2-aminoethanethiol dioxygenase [Sesamum indicum]                      |
| c41875.graph_c0 | 370.321664    | 426.445212    | 351.088867    | 288.405234     | 366.888327     | 326.547177     | 1.713E-18 | -1.31506 | down      | PREDICTED: basic 7S globulin 2-like [Sesamum indicum]                                     |
| c41879.graph_c0 | 3.7606396     | 1.5724731     | 1.65163811    | 0.24218327     | 0.40609917     | 0.31054504     | 0.0001826 | -3.9467  | down      | PREDICTED: neat shock cognate 70 kDa protein 2-like [Elaeis guineensis]                   |
| c41882.graph_c0 | 0.5052771     | 0.39338682    | 0.64930108    | 4.57000426     | 4.47628279     | 3.8622678      | 8.819E-12 | 1.96424  | up        | hypothetical protein MIMGU_mgv1a004014mg [Erythranthe guttata]                            |
| c41887.graph_c0 | 0.88975544    | 0.68822676    | 0.46774267    | 0.14697026     | 0.19905054     | 0.29981632     | 1.42E-07  | -2.74388 | down      | hypothetical protein VITISV_000584 [Vitis vinifera]                                       |
| c41892.graph_c0 | 0.09631117    | 0.04820381    | 0             | 4.72489242     | 6.92061877     | 7.42535663     | 6.519E-18 | 5.97838  | up        | PREDICTED: tetraspanin-10 [Nicotiana glauca]                                              |
| c41899.graph_c0 | 40.9931655    | 47.5692925    | 42.5324788    | 18.9520377     | 17.1368213     | 18.2785195     | 5.889E-63 | -2.36022 | down      | hypothetical protein AALP_AA7G017200 [Arabis alpina]                                      |
| c41900.graph_c2 | 14.246858     | 15.5889754    | 14.6769047    | 10.9040766     | 10.8812542     | 10.5733198     | 8.646E-71 | -1.55088 | down      | PREDICTED: LRR receptor-like serine/threonine-protein kinase RPK2 [Sesamum indicum]       |
| c41909.graph_c0 | 1.24568401    | 0.73348904    | 0.28248587    | 496.135064     | 487.681974     | 469.375288     | 0         | 8.25205  | up        | hypothetical protein MIMGU_mgv1a015091mg [Erythranthe guttata]                            |
| c41910.graph_c0 | 101.022111    | 101.512477    | 95.7505618    | 64.5848959     | 71.0485702     | 64.54479       | 5.88E-94  | -1.66556 | down      | hypothetical protein MIMGU_mgv1a001953mg [Erythranthe guttata]                            |
| c41914.graph_c0 | 0.91836278    | 0.78795633    | 0.84295181    | 5.62574083     | 5.4238905      | 5.05739504     | 0.0004471 | 1.56934  | up        | -                                                                                         |
| c41915.graph_c0 | 13.7134237    | 13.37176      | 13.0598866    | 13.3858818     | 13.8918448     | 14.8049596     | 6.924E-26 | -1.0216  | down      | PREDICTED: zinc finger BED domain-containing protein RICESLEEPER 1-like [Sesamum indicum] |
| c41927.graph_c0 | 1.11476237    | 1.56920433    | 1.611578      | 9.31733294     | 7.9554673      | 7.80946725     | 2.343E-11 | 1.45117  | up        | hypothetical protein MIMGU_mgv1a006605mg [Erythranthe guttata]                            |
| c41931.graph_c0 | 1.47187514    | 1.56264288    | 1.23228737    | 7.84483604     | 7.12705525     | 7.20810035     | 4.129E-12 | 1.28983  | up        | PREDICTED: zeaxanthin epoxidase, chloroplastic-like [Sesamum indicum]                     |
| c41932.graph_c0 | 3.35247379    | 3.29919229    | 3.07199325    | 17.3848972     | 16.8108481     | 18.581812      | 8.386E-39 | 1.35135  | up        | PREDICTED: kinesin-like calmodulin-binding protein homolog [Sesamum indicum]              |
| c41933.graph_c0 | 0.94121077    | 1.04683694    | 0.76153269    | 4.71245854     | 4.98693544     | 3.86600149     | 3.109E-05 | 1.21397  | up        | PREDICTED: uncharacterized protein LOC105167458 [Sesamum indicum]                         |
| c41936.graph_c0 | 2.1474924     | 3.15512087    | 1.86941509    | 1.00695813     | 1.25013457     | 1.25304616     | 2.987E-06 | -2.11828 | down      | PREDICTED: cyclic nucleotide-gated ion channel 4 [Sesamum indicum]                        |
| c41941.graph_c0 | 0             | 0             | 0             | 3.84676527     | 4.98725714     | 7.00222633     | 3.399E-09 | Inf      | up        | 60S ribosomal protein L35 [Galdieria sulphuraria]                                         |
| c41944.graph_c0 | 24.0428783    | 9.7337457     | 15.2420516    | 0              | 0              | 0              | 3.714E-16 | -Inf     | down      | --                                                                                        |
| c41954.graph_c0 | 49.0201818    | 50.2668909    | 48.1735337    | 24.0335238     | 20.2606204     | 22.3508086     | 5.63E-149 | -2.23581 | down      | PREDICTED: pheophorbide a oxygenase, chloroplastic-like [Citrus sinensis]                 |
| c41957.graph_c0 | 0.18666452    | 0.18685144    | 0.3198284     | 2.39677834     | 1.79658319     | 1.95575155     | 1.71E-05  | 2.05043  | up        | PREDICTED: RING-H2 finger protein A1L39-like [Sesamum indicum]                            |

| #ID             | 0 h-1<br>FPKM | 0 h-2<br>FPKM | 0 h-3<br>FPKM | 28 h-1<br>FPKM | 28 h-2<br>FPKM | 28 h-3<br>FPKM | FDR       | log2FC   | regulated | nr_annotation                                                                                     |
|-----------------|---------------|---------------|---------------|----------------|----------------|----------------|-----------|----------|-----------|---------------------------------------------------------------------------------------------------|
| c41963.graph_c0 | 6.52687248    | 5.02569858    | 4.70978567    | 4.99912294     | 5.56804337     | 4.61520249     | 3.876E-08 | -1.18675 | down      | PREDICTED: lachrymatory-factor synthase-like [Sesamum indicum]                                    |
| c41964.graph_c0 | 1.26295542    | 1.03201639    | 1.25861252    | 0.74931324     | 0.45667773     | 0.50443263     | 6.465E-11 | -2.14636 | down      | hypothetical protein M569_02915, partial [Genlisea aurea]                                         |
| c41968.graph_c0 | 5.08219914    | 5.45952879    | 6.05296171    | 1.17117731     | 1.22014996     | 1.32323693     | 3.365E-32 | -3.25169 | down      | -                                                                                                 |
| c41974.graph_c0 | 0.41854669    | 0.37706922    | 0.32270944    | 2.06854177     | 2.14236093     | 1.7872022      | 0.0018015 | 1.33494  | up        | unnamed protein product [Coffea canephora]                                                        |
| c41980.graph_c0 | 0.63563064    | 0.40489727    | 0.59404403    | 2.22586841     | 3.29902437     | 2.09044749     | 0.0068953 | 1.12756  | up        | PREDICTED: probable serine/threonine-protein kinase At5g41260, partial [Sesamum indicum]          |
| c41981.graph_c1 | 63.2914967    | 67.4521272    | 57.6906595    | 42.0281119     | 39.8619617     | 38.7751024     | 9.002E-71 | -1.73242 | down      | PREDICTED: homeobox-leucine zipper protein ANTHOCYANINLESS 2-like [Sesamum indicum]               |
| c41985.graph_c0 | 0.06753857    | 0.1014093     | 0.08678973    | 1.93892236     | 1.92794764     | 1.18160182     | 2.243E-08 | 3.20857  | up        | PREDICTED: probable GABA transporter 2 [Sesamum indicum]                                          |
| c41988.graph_c0 | 13.3213072    | 16.58585      | 17.6023197    | 8.62129334     | 9.29781781     | 9.43570587     | 1.487E-12 | -1.88979 | down      | hypothetical protein MIMGU_mgv1a002241mg [Erythranthe outtata]                                    |
| c41989.graph_c0 | 0.38546974    | 0.16077322    | 0.04127866    | 2.80157186     | 3.56245905     | 3.06713018     | 1.778E-12 | 2.93407  | up        | PREDICTED: transcription factor bHLH18-like [Sesamum indicum]                                     |
| c41992.graph_c0 | 1.92634212    | 1.22708158    | 1.68779038    | 1.14549901     | 1.26411781     | 1.5059343      | 0.0005884 | -1.39498 | down      | -                                                                                                 |
| c41994.graph_c0 | 66.2339926    | 66.5577929    | 61.4385831    | 50.9426676     | 50.2796084     | 51.369885      | 3.452E-70 | -1.43755 | down      | PREDICTED: neurofilament medium polypeptide [Sesamum indicum]                                     |
| c41997.graph_c0 | 2.00293685    | 2.0806007     | 2.71954295    | 12.3873784     | 12.5734216     | 12.8423144     | 2.351E-14 | 1.3797   | up        | unnamed protein product [Coffea canephora]                                                        |
| c41999.graph_c0 | 4.73631583    | 6.77294076    | 5.73856174    | 25.6207485     | 28.7721125     | 29.7343268     | 1.078E-13 | 1.19465  | up        | -                                                                                                 |
| c41999.graph_c1 | 5.80139966    | 7.43322737    | 6.73082551    | 32.3580412     | 34.2415641     | 33.6389192     | 1.283E-29 | 1.23616  | up        | PREDICTED: uncharacterized protein LOC105156173 isoform X1 [Sesamum indicum]                      |
| c42001.graph_c0 | 47.2488427    | 49.0984337    | 45.555003     | 31.6635554     | 31.3819072     | 31.8960833     | 5.544E-94 | -1.66968 | down      | PREDICTED: ubiquitin-activating enzyme E1 1 [Sesamum indicum]                                     |
| c42002.graph_c0 | 3.24942901    | 2.11139061    | 1.75816629    | 0              | 0              | 0              | 6.833E-20 | -Inf     | down      | predicted protein [Hordeum vulgare subsp. vulgare]                                                |
| c42004.graph_c0 | 95.13054      | 94.1304626    | 93.8600093    | 43.4177402     | 43.8022863     | 45.162746      | 1.91E-155 | -2.18694 | down      | PREDICTED: uncharacterized protein At1g04910-like [Sesamum indicum]                               |
| c42005.graph_c0 | 4.10026854    | 3.22753073    | 3.28115461    | 2.73622914     | 3.48568879     | 3.61438707     | 1.607E-10 | -1.19674 | down      | PREDICTED: chromatin assembly factor 1 subunit FAS1-like [Sesamum indicum]                        |
| c42006.graph_c0 | 116.269162    | 112.846983    | 116.559007    | 77.4852765     | 80.9668708     | 83.6810052     | 5.814E-86 | -1.60406 | down      | PREDICTED: 50S ribosomal protein L1, chloroplastic [Sesamum indicum]                              |
| c42007.graph_c0 | 9.85294818    | 8.82462342    | 9.66266912    | 8.40483003     | 9.80074783     | 8.5497749      | 3.457E-13 | -1.17407 | down      | PREDICTED: phytochromobilin:ferredoxin oxidoreductase, chloroplastic isoform X1 [Sesamum indicum] |
| c42013.graph_c0 | 44.9178524    | 45.2853762    | 40.2475068    | 35.2221223     | 34.0225126     | 33.9196884     | 2.132E-65 | -1.42771 | down      | PREDICTED: CBL-interacting protein kinase 18 [Sesamum indicum]                                    |
| c42014.graph_c0 | 0             | 0             | 0             | 2.41552374     | 1.92812289     | 2.68519535     | 3.965E-16 | Inf      | up        | hypothetical protein MIMGU_mgv1a013619mg [Erythranthe outtata]                                    |
| c42016.graph_c1 | 2.02107492    | 1.9545191     | 2.2890235     | 1.56849242     | 1.19140769     | 1.84871123     | 6.459E-08 | -1.53357 | down      | PREDICTED: uncharacterized protein LOC105163887 isoform X1 [Sesamum indicum]                      |
| c42018.graph_c0 | 1.83423134    | 1.29937123    | 1.23292364    | 12.8183535     | 13.2589125     | 14.0912698     | 5.449E-34 | 2.11576  | up        | PREDICTED: GPI transamidase component PG-S [Sesamum indicum]                                      |
| c42019.graph_c0 | 2.11082769    | 2.65241576    | 2.53935904    | 12.1098931     | 11.7003691     | 12.3053561     | 1.081E-09 | 1.21408  | up        | PREDICTED: uncharacterized protein LOC105165798 [Sesamum indicum]                                 |



| #ID             | 0 h-1<br>FPKM | 0 h-2<br>FPKM | 0 h-3<br>FPKM | 28 h-1<br>FPKM | 28 h-2<br>FPKM | 28 h-3<br>FPKM | FDR       | log2FC   | regulated | nr_annotation                                                                                       |
|-----------------|---------------|---------------|---------------|----------------|----------------|----------------|-----------|----------|-----------|-----------------------------------------------------------------------------------------------------|
| c42029.graph_c1 | 6.9755975     | 5.4582159     | 6.56512374    | 27.2056756     | 28.3036024     | 29.0168119     | 2.367E-15 | 1.06327  | up        | PREDICTED: vesicle-associated membrane protein 724 [Nicotiana sylvestris]                           |
| c42030.graph_c0 | 2.16296909    | 0.88372856    | 1.07776566    | 0              | 0              | 0              | 1.373E-09 | -Inf     | down      | --                                                                                                  |
| c42033.graph_c0 | 1.86908674    | 1.48456477    | 1.7491737     | 11.3990958     | 10.1456626     | 10.4100462     | 8.634E-25 | 1.55633  | up        | PREDICTED: protein ROOT PRIMORDIUM DEFECTIVE 1 [Sesamum indicum]                                    |
| c42041.graph_c0 | 5.26157556    | 6.01925055    | 4.24998068    | 3.60556377     | 3.6500904      | 3.7445044      | 1.005E-09 | -1.58496 | down      | PREDICTED: probable LRR receptor-like serine/threonine-protein kinase RLK [Sesamum indicum]         |
| c42043.graph_c0 | 39.3487022    | 40.7362088    | 39.7293602    | 31.3859038     | 32.872693      | 33.16361       | 1.059E-60 | -1.38894 | down      | PREDICTED: probable zinc metalloprotease EGY1, chloroplastic [Sesamum indicum]                      |
| c42045.graph_c0 | 1.32328592    | 1.64768685    | 1.24424986    | 7.71751014     | 6.92582827     | 7.44589186     | 5.463E-09 | 1.30073  | up        | PREDICTED: membrane-bound transcription factor site-2 protease [Sesamum indicum]                    |
| c42048.graph_c0 | 0.49804745    | 0.565019      | 0.34133904    | 2.50971426     | 2.68002414     | 2.4811173      | 0.0002537 | 1.36352  | up        | PREDICTED: probable glucan 1,3-beta-glucosidase A [Beta vulgaris subsp. vulgaris]                   |
| c42052.graph_c0 | 14.4849852    | 12.5634783    | 13.8545745    | 1.9739257      | 1.91729028     | 3.09939123     | 3.47E-127 | -3.63667 | down      | PREDICTED: homeobox-leucine zipper protein HOX11-like [Sesamum indicum]                             |
| c42061.graph_c0 | 0.56910493    | 0.55068564    | 0.51192566    | 3.41927671     | 4.35705725     | 3.73513638     | 4.475E-12 | 1.72896  | up        | PREDICTED: putative ion channel POLLUX-like 2 isoform X4 [Sesamum indicum]                          |
| c42063.graph_c0 | 0.9466137     | 0.54858829    | 0.60821804    | 3.13218038     | 3.89063307     | 3.64908036     | 5.977E-06 | 1.25725  | up        | PREDICTED: uncharacterized CRM domain-containing protein At3g25440, chloroplastic [Sesamum indicum] |
| c42066.graph_c1 | 4.25717172    | 3.92998972    | 3.55591224    | 24.8042711     | 24.8481537     | 25.6682961     | 6.071E-45 | 1.593    | up        | PREDICTED: uncharacterized protein LOC105165741 [Sesamum indicum]                                   |
| c42067.graph_c0 | 0             | 0             | 0             | 1.15828787     | 1.12329389     | 1.71527848     | 2.559E-11 | Inf      | up        | -                                                                                                   |
| c42073.graph_c0 | 0.33216219    | 0.53199168    | 0.2987891     | 3.09009365     | 3.46578367     | 2.83667758     | 1.311E-07 | 1.92508  | up        | PREDICTED: protein OBERON 2 isoform X2 [Sesamum indicum]                                            |
| c42075.graph_c0 | 16.8105268    | 15.0266462    | 17.1382708    | 86.4713243     | 97.81826       | 90.0208873     | 8.865E-46 | 1.39431  | up        | PREDICTED: ATP synthase subunit alpha, mitochondrial [Sesamum indicum]                              |
| c42078.graph_c0 | 2.16740261    | 1.17274213    | 1.4302369     | 13.6238333     | 16.6448503     | 15.6679327     | 1.572E-20 | 2.18127  | up        | PREDICTED: uncharacterized protein LOC105156356 isoform X1 [Sesamum indicum]                        |
| c42079.graph_c0 | 0.82334184    | 1.06766997    | 0.72138195    | 10.5264019     | 9.18508622     | 10.5204214     | 2.205E-46 | 2.44491  | up        | PREDICTED: uncharacterized protein LOC105156622 [Sesamum indicum]                                   |
| c42083.graph_c0 | 3.31687134    | 2.95128239    | 2.55010059    | 23.4268935     | 22.7894048     | 23.1848514     | 2.747E-47 | 1.88902  | up        | PREDICTED: imidazole glycerol phosphate synthase hisHF, chloroplastic [Sesamum indicum]             |
| c42089.graph_c0 | 5.28745057    | 4.53003515    | 4.62862445    | 3.37301576     | 3.33340167     | 3.92997712     | 6.885E-23 | -1.53006 | down      | PREDICTED: U-box domain-containing protein 9-like [Sesamum indicum]                                 |
| c42091.graph_c0 | 15.2817122    | 14.8003582    | 13.3892763    | 232.398453     | 233.124786     | 206.897991     | 3.15E-165 | 2.86177  | up        | PREDICTED: calnexin homolog 1 [Sesamum indicum]                                                     |
| c42092.graph_c0 | 1.93549567    | 2.2572044     | 2.36645126    | 22.3980548     | 22.8375805     | 21.1852886     | 6.735E-83 | 2.24697  | up        | PREDICTED: protein PAT1 homolog 1-like [Sesamum indicum]                                            |
| c42096.graph_c0 | 27.0197639    | 26.7402737    | 26.9114068    | 16.0595157     | 16.6180754     | 15.647085      | 6.991E-96 | -1.83006 | down      | PREDICTED: uncharacterized protein LOC105170420 [Sesamum indicum]                                   |
| c42097.graph_c0 | 4.29819141    | 2.34921528    | 2.91415808    | 0              | 0              | 0              | 1.512E-26 | -Inf     | down      | predicted protein [Hordeum vulgare subsp. vulgare]                                                  |

| #ID             | 0 h-1<br>FPKM | 0 h-2<br>FPKM | 0 h-3<br>FPKM | 28 h-1<br>FPKM | 28 h-2<br>FPKM | 28 h-3<br>FPKM | FDR       | log2FC   | regulated | nr_annotation                                                                                    |
|-----------------|---------------|---------------|---------------|----------------|----------------|----------------|-----------|----------|-----------|--------------------------------------------------------------------------------------------------|
| c42099.graph_c0 | 11.5852891    | 12.1767345    | 11.3517608    | 128.301599     | 122.686636     | 76.5229809     | 2.136E-07 | 2.12919  | up        | --                                                                                               |
| c42100.graph_c0 | 1.99919642    | 2.08635569    | 2.15909231    | 20.9603618     | 24.9266087     | 22.1865992     | 1.609E-54 | 2.35463  | up        | PREDICTED: 4-hydroxy-3-methylbut-2-en-1-yl diphosphate synthase, chloroplastic [Sesamum indicum] |
| c42109.graph_c1 | 2.43700469    | 1.14186787    | 1.46587756    | 10.2503545     | 8.37042953     | 10.7320138     | 9.021E-07 | 1.45644  | up        | hypothetical protein MIMGU_mgv1a0024/9mg [Erythranthe diffusa]                                   |
| c42117.graph_c0 | 28.7682554    | 30.5436298    | 27.6168865    | 190.589951     | 178.158932     | 168.83317      | 6.423E-77 | 1.53839  | up        | PREDICTED: monosaccharide-sensing protein Z-like [Sesamum indicum]                               |
| c42120.graph_c0 | 9.24910311    | 8.30060283    | 7.45915307    | 107.833277     | 112.097602     | 101.080029     | 3.15E-127 | 2.59367  | up        | PREDICTED: chaperone protein dnaJ 11, chloroplastic-like [Sesamum indicum]                       |
| c42122.graph_c0 | 69.1541318    | 62.415697     | 65.9593961    | 68.9395366     | 72.7690247     | 64.9575632     | 3.243E-31 | -1.02543 | down      | PREDICTED: cyclic dof factor 1 [Sesamum indicum]                                                 |
| c42123.graph_c1 | 42.254896     | 39.1095922    | 41.3933141    | 191.073434     | 213.551992     | 197.68038      | 9.71E-49  | 1.20397  | up        | PREDICTED: elongation factor 1-delta-like [Sesamum indicum]                                      |
| c42128.graph_c0 | 156.365536    | 164.873214    | 150.780296    | 127.616352     | 128.76837      | 125.226875     | 3.152E-67 | -1.39677 | down      | PREDICTED: glycine-rich RNA-binding protein 2, mitochondrial-like [Sesamum indicum]              |
| c42129.graph_c1 | 0.19090324    | 0.34396992    | 0.34344551    | 1.44297268     | 1.57847595     | 2.10583106     | 0.0005633 | 1.451    | up        | PREDICTED: cytochrome P450 90A1 [Sesamum indicum]                                                |
| c42134.graph_c1 | 47.2791889    | 46.4541533    | 48.4365157    | 24.5444585     | 28.3093308     | 25.1966139     | 1.258E-34 | -1.95642 | down      | 70 kDa heat shock protein-like protein, partial [Arachis diogeni]                                |
| c42138.graph_c0 | 0.49482988    | 0.2251479     | 0.28903454    | 11.7046312     | 12.7379095     | 11.4850707     | 1.546E-80 | 4.06899  | up        | PREDICTED: LOW QUALITY PROTEIN: putative kinase-like protein TMKL1 [Sesamum indicum]             |
| c42141.graph_c0 | 35.205188     | 36.7590665    | 35.9463526    | 23.5176189     | 23.98906       | 23.1711932     | 7.863E-93 | -1.70134 | down      | PREDICTED: uncharacterized protein LOC105177867 [Sesamum indicum]                                |
| c42144.graph_c1 | 81.6563307    | 82.959765     | 87.2424157    | 35.1298359     | 34.2519939     | 36.1224338     | 1.7E-112  | -2.34649 | down      | hypothetical protein MIMGU_mgv1a0055/6mg [Erythranthe diffusa]                                   |
| c42147.graph_c0 | 38.616984     | 36.8917054    | 38.0431809    | 20.9310248     | 19.6586678     | 20.7223854     | 2.209E-92 | -1.97943 | down      | PREDICTED: F-box protein CPR30-like [Sesamum indicum]                                            |
| c42152.graph_c2 | 53.1071726    | 51.3777763    | 50.1919797    | 29.9407634     | 29.0592821     | 29.665046      | 1.04E-106 | -1.89266 | down      | PREDICTED: snaggy-related protein kinase alpha [Sesamum indicum]                                 |
| c42153.graph_c0 | 9.68564675    | 12.003761     | 9.82168018    | 46.6424895     | 48.5994922     | 48.4540701     | 5.463E-19 | 1.09906  | up        | PREDICTED: mediator-associated protein 2-like isoform X1 [Sesamum indicum]                       |
| c42159.graph_c0 | 13.3463733    | 13.6369107    | 11.6353779    | 144.031911     | 158.084618     | 140.683215     | 5.61E-139 | 2.43016  | up        | PREDICTED: serine/threonine-protein kinase SRK2E isoform X1 [Sesamum indicum]                    |
| c42163.graph_c0 | 109.164041    | 99.6404399    | 111.103397    | 8.30554339     | 9.96594504     | 9.54166246     | 6.86E-197 | -4.61483 | down      | -                                                                                                |
| c42163.graph_c1 | 117.671901    | 119.655907    | 113.345388    | 12.7337869     | 13.3127971     | 13.2677155     | 0         | -4.24696 | down      | PREDICTED: BAG family molecular chaperone regulator 6 [Sesamum indicum]                          |
| c42164.graph_c0 | 1.44810974    | 2.07079972    | 1.68365184    | 1.85436567     | 0.99554063     | 1.18598027     | 9.193E-05 | -1.45792 | down      | -                                                                                                |
| c42173.graph_c0 | 1.67635       | 2.30728934    | 1.11555549    | 1.24011798     | 1.11971026     | 1.59777812     | 0.0036816 | -1.44906 | down      | PREDICTED: rop guanine nucleotide exchange factor 12-like [Sesamum indicum]                      |
| c42176.graph_c0 | 3.35393568    | 3.28430949    | 3.65407968    | 19.3949855     | 24.0668368     | 20.6691245     | 1.038E-14 | 1.54723  | up        | ribosomal protein L7Ae/L30e/S12e/Gadd45 family protein [Medicago truncatula]                     |
| c42181.graph_c1 | 7.0167447     | 6.37741163    | 5.4211404     | 29.0340434     | 27.5427193     | 27.4188755     | 2.49E-16  | 1.07087  | up        | PREDICTED: ethanolamine-phosphate cytidyltransferase [Sesamum indicum]                           |

| #ID             | 0 h-1<br>FPKM | 0 h-2<br>FPKM | 0 h-3<br>FPKM | 28 h-1<br>FPKM | 28 h-2<br>FPKM | 28 h-3<br>FPKM | FDR       | log2FC   | regulated | nr_annotation                                                                                 |
|-----------------|---------------|---------------|---------------|----------------|----------------|----------------|-----------|----------|-----------|-----------------------------------------------------------------------------------------------|
| c42188.graph_c0 | 5.13143019    | 6.62046612    | 4.39606064    | 3.72949389     | 3.66670627     | 4.39578614     | 4.102E-07 | -1.54058 | down      | -                                                                                             |
| c42189.graph_c0 | 0.02244671    | 0.06740755    | 0.11537963    | 12.1214038     | 13.4486143     | 12.9261488     | 1.64E-117 | 6.44455  | up        | PREDICTED: uncharacterized protein At1g04910 [Sesamum indicum]                                |
| c42192.graph_c2 | 3.42697869    | 3.04310591    | 3.12527976    | 38.6059796     | 44.4334396     | 39.4350712     | 9.013E-68 | 2.58398  | up        | PREDICTED: rac-like GTP-binding protein ARAC7 isoform X3 [Sesamum indicum]                    |
| c42206.graph_c0 | 0.16767392    | 0.83920911    | 0.53866907    | 2.74194991     | 2.36569152     | 2.63517029     | 0.0062069 | 1.22869  | up        | F15O4.13 [Arabidopsis thaliana]                                                               |
| c42211.graph_c0 | 1.28695203    | 1.53130501    | 1.84100518    | 10.2711944     | 9.70415919     | 8.10759735     | 5.057E-14 | 1.49575  | up        | PREDICTED: uncharacterized protein LOC105176468 [Sesamum indicum]                             |
| c42219.graph_c0 | 191.547767    | 182.752306    | 196.438422    | 41.0792763     | 48.543931      | 45.9810081     | 7.91E-201 | -3.16448 | down      | PREDICTED: uncharacterized protein LOC105161471 [Sesamum indicum]                             |
| c42226.graph_c0 | 2.82484639    | 3.33261702    | 2.56695647    | 19.2843066     | 17.5443308     | 17.2436051     | 2.573E-37 | 1.54269  | up        | PREDICTED: filament-like plant protein 3 [Sesamum indicum]                                    |
| c42229.graph_c0 | 58.4229465    | 54.4847262    | 54.6657454    | 50.1429311     | 48.9155804     | 49.778502      | 4.215E-54 | -1.26087 | down      | PREDICTED: zinc finger CCCH domain-containing protein 17 isoform X1 [Sesamum indicum]         |
| c42230.graph_c1 | 1.60876864    | 1.54036307    | 1.67783418    | 8.72696441     | 8.55284179     | 8.75276964     | 1.069E-14 | 1.33996  | up        | hypothetical protein MIMGU_mgv1a00645/mg [Erythranthe outtata]                                |
| c42233.graph_c2 | 2.87116539    | 2.10762965    | 1.47582448    | 10.4337323     | 11.5560366     | 10.3301263     | 0.002687  | 1.24073  | up        | PREDICTED: probable serine/threonine protein kinase IREH1 [Sesamum indicum]                   |
| c42237.graph_c1 | 132.721667    | 131.735007    | 135.459963    | 26.7571843     | 40.1838311     | 36.6473567     | 0         | -3.03959 | down      | PREDICTED: E3 ubiquitin-protein ligase KNFS5-like [Sesamum indicum]                           |
| c42239.graph_c0 | 0             | 0             | 0             | 7.24571773     | 10.8243735     | 21.2848074     | 1.154E-05 | Inf      | up        | --                                                                                            |
| c42243.graph_c0 | 87.3297975    | 79.3778156    | 83.5142306    | 392.297812     | 402.368819     | 428.348693     | 4.117E-51 | 1.19929  | up        | unnamed protein product [Coffea canephora]                                                    |
| c42246.graph_c0 | 1.17864354    | 1.02758845    | 1.12373817    | 0.38686576     | 0.14970151     | 0.38332487     | 2.204E-13 | -2.94376 | down      | hypothetical protein VITISV_034155 [Vitis vinifera]                                           |
| c42248.graph_c0 | 1.76387973    | 1.40531007    | 1.54965209    | 0.40552353     | 0.53150767     | 0.54439027     | 3.378E-25 | -2.76034 | down      | PREDICTED: 65-kDa microtubule-associated protein 3 [Sesamum indicum]                          |
| c42251.graph_c0 | 5.1352324     | 4.91118588    | 5.00177234    | 28.1702224     | 30.0284071     | 28.9030721     | 2.839E-34 | 1.4427   | up        | PREDICTED: ATPase family AAA domain-containing protein At1g05910 isoform X1 [Sesamum indicum] |
| c42253.graph_c0 | 14.2631371    | 14.9428925    | 12.8533863    | 4.41449055     | 4.24366373     | 4.17567095     | 7.17E-120 | -2.80167 | down      | PREDICTED: lysM domain receptor-like kinase 5 [Sesamum indicum]                               |
| c42256.graph_c0 | 77.1738581    | 79.1782509    | 78.9217926    | 37.6060594     | 32.9097443     | 34.196055      | 7.97E-166 | -2.25871 | down      | PREDICTED: mpv17-like protein isoform X2 [Sesamum indicum]                                    |
| c42268.graph_c0 | 64.7965441    | 62.6401462    | 56.4612762    | 52.3837382     | 50.5595079     | 58.2738741     | 5.861E-42 | -1.27809 | down      | -                                                                                             |
| c42279.graph_c0 | 134.012253    | 130.081402    | 107.59526     | 62.2632781     | 62.2813513     | 64.8372614     | 3.012E-43 | -2.06039 | down      | PREDICTED: transcription factor bHLH150-like [Sesamum indicum]                                |
| c42284.graph_c0 | 26.2859333    | 27.5477867    | 23.6155529    | 6.27955453     | 5.72984738     | 6.39830365     | 3.77E-166 | -3.16157 | down      | PREDICTED: DNA repair protein RAD51 homolog [Sesamum indicum]                                 |
| c42290.graph_c0 | 78.541665     | 77.2889526    | 71.468992     | 81.8860086     | 76.8983162     | 76.9894774     | 1.657E-38 | -1.03663 | down      | unknown [Lotus japonicus]                                                                     |
| c42290.graph_c1 | 2.90700641    | 2.50854942    | 2.5762885     | 0.14571003     | 0.06578125     | 0.35669459     | 6.136E-23 | -4.89669 | down      | -                                                                                             |
| c42293.graph_c1 | 10.0265538    | 7.91119751    | 11.2171103    | 4.11514814     | 3.79300112     | 5.80641592     | 6.542E-11 | -2.17885 | down      | hypothetical protein CISIN_1g015935mg [Citrus sinensis]                                       |
| c42299.graph_c0 | 6.71034372    | 7.32770522    | 5.48740013    | 6.57661339     | 5.33758676     | 5.90913883     | 2.276E-06 | -1.21919 | down      | hypothetical protein MIMGU_mgv1a012462mg [Erythranthe outtata]                                |

| #ID             | 0 h-1<br>FPKM | 0 h-2<br>FPKM | 0 h-3<br>FPKM | 28 h-1<br>FPKM | 28 h-2<br>FPKM | 28 h-3<br>FPKM | FDR       | log2FC   | regulated | nr_annotation                                                                                          |
|-----------------|---------------|---------------|---------------|----------------|----------------|----------------|-----------|----------|-----------|--------------------------------------------------------------------------------------------------------|
| c42300.graph_c0 | 0.3715127     | 0             | 0.11935213    | 5.19775587     | 4.38834036     | 3.24984746     | 1.755E-09 | 3.63061  | up        | PREDICTED: putative B3 domain-containing protein At5g66980 [Sesamum indicum]                           |
| c42303.graph_c0 | 29.961936     | 31.3316359    | 29.4037539    | 13.2100351     | 14.222248      | 14.1590078     | 6.67E-108 | -2.21486 | down      | PREDICTED: high mobility group B protein 10 [Sesamum indicum]                                          |
| c42308.graph_c0 | 0.43596474    | 0.5727767     | 0.28011598    | 27.4477082     | 26.0343589     | 25.9037233     | 1.85E-163 | 4.85987  | up        | PREDICTED: zinc finger CCCH domain-containing protein 53 [Sesamum indicum]                             |
| c42309.graph_c1 | 1.84959068    | 1.51757603    | 1.0909889     | 10.7541747     | 11.5803826     | 11.3647571     | 8.173E-22 | 1.83386  | up        | PREDICTED: serine/threonine-protein kinase-like protein At3g51990 [Sesamum indicum]                    |
| c42316.graph_c0 | 0             | 0.12859377    | 0             | 4.57501826     | 5.3110447      | 6.01879645     | 1.372E-13 | 5.86969  | up        | -                                                                                                      |
| c42329.graph_c0 | 8.13081282    | 9.18914229    | 10.6506438    | 5.68067585     | 7.88300636     | 7.52861205     | 1.294E-08 | -1.5008  | down      | PREDICTED: AP2-like ethylene-responsive transcription factor BBM2 [Sesamum indicum]                    |
| c42333.graph_c0 | 2.00739047    | 1.50705043    | 2.07799197    | 0              | 0.18295888     | 0              | 6.536E-30 | -6.03569 | down      | PREDICTED: uncharacterized protein LOC105169088 [Sesamum indicum]                                      |
| c42334.graph_c1 | 689.972084    | 727.482483    | 684.610474    | 180.467254     | 188.342673     | 195.26202      | 1.8E-192  | -2.98791 | down      | PREDICTED: protein EXORDIUM-like 2 [Sesamum indicum]                                                   |
| c42337.graph_c0 | 50.0922986    | 47.3485971    | 48.2307477    | 13.8260405     | 15.0863804     | 14.8538233     | 3.59E-154 | -2.82498 | down      | unnamed protein product [Coffea canephora]                                                             |
| c42339.graph_c0 | 40.4468872    | 38.1878028    | 40.6385207    | 10.5507911     | 10.7292003     | 11.4066765     | 0         | -2.95795 | down      | PREDICTED: uncharacterized protein LOC105156535 [Sesamum indicum]                                      |
| c42340.graph_c0 | 189.989555    | 195.368149    | 196.193148    | 161.234315     | 178.706586     | 178.569684     | 5.925E-46 | -1.25628 | down      | phosphoglycerate kinase [Gossypium hirsutum]                                                           |
| c42346.graph_c0 | 9.83535735    | 10.2454176    | 10.069957     | 50.1541995     | 48.0918663     | 44.9800211     | 1.69E-29  | 1.15691  | up        | PREDICTED: uncharacterized protein LOC105168920 [Sesamum indicum]                                      |
| c42352.graph_c0 | 2.5301706     | 2.58386992    | 2.52884286    | 14.4512589     | 12.5114478     | 13.0652933     | 8.107E-19 | 1.29832  | up        | PREDICTED: putative ABC transporter C family member 15 [Sesamum indicum]                               |
| c42353.graph_c0 | 2.75948121    | 1.18381903    | 1.74999505    | 0              | 0              | 0              | 6.975E-14 | -Inf     | down      | predicted protein [Physcomitrella patens]                                                              |
| c42358.graph_c0 | 248.889005    | 279.994799    | 241.911836    | 23.8790996     | 21.7270791     | 31.4470765     | 1.06E-182 | -4.41056 | down      | hypothetical protein MIMGU_mgv1a016285mg [Erythranthe outtata]                                         |
| c42361.graph_c1 | 2.58740504    | 2.73388459    | 2.77076493    | 2.71629377     | 2.8298753      | 1.8754776      | 0.0021479 | -1.21785 | down      | copalyl diphosphate synthase [Isodon eriocalyx]                                                        |
| c42363.graph_c0 | 4.31296147    | 3.2294616     | 2.9239044     | 0.8145116      | 1.06971288     | 0.96674154     | 5.764E-18 | -2.96248 | down      | PREDICTED: uncharacterized protein LOC105168320 [Sesamum indicum]                                      |
| c42364.graph_c0 | 27.6071161    | 25.7869272    | 26.6956915    | 26.913121      | 26.9940009     | 27.4511087     | 4.776E-34 | -1.06754 | down      | PREDICTED: probable mediator of RNA polymerase II transcription subunit 26b [Sesamum indicum]          |
| c42367.graph_c0 | 872.339612    | 928.883009    | 773.152763    | 767.07005      | 782.174312     | 804.683357     | 6.471E-31 | -1.21779 | down      | PREDICTED: fructose-bisphosphate aldolase cytoplasmic isozyme-like [Solanum lycopersicum]              |
| c42368.graph_c0 | 13.5472044    | 15.0006903    | 12.7757351    | 15.5498459     | 13.1677773     | 13.0773028     | 2.862E-21 | -1.07341 | down      | PREDICTED: pentatricopeptide repeat-containing protein At4g19191, mitochondrial-like [Sesamum indicum] |
| c42372.graph_c1 | 0.50863441    | 0.71280122    | 1.04578456    | 57.2253115     | 51.2685553     | 59.0630281     | 3.84E-100 | 5.10885  | up        | -                                                                                                      |
| c42373.graph_c0 | 9.71320584    | 9.59946634    | 8.95523498    | 56.9914719     | 55.6668643     | 54.4961209     | 3.621E-55 | 1.4743   | up        | PREDICTED: ethylene-responsive transcription factor ERF118-like [Sesamum indicum]                      |

| #ID             | 0 h-1<br>FPKM | 0 h-2<br>FPKM | 0 h-3<br>FPKM | 28 h-1<br>FPKM | 28 h-2<br>FPKM | 28 h-3<br>FPKM | FDR       | log2FC   | regulated | nr_annotation                                                                             |
|-----------------|---------------|---------------|---------------|----------------|----------------|----------------|-----------|----------|-----------|-------------------------------------------------------------------------------------------|
| c42379.graph_c0 | 2.1364789     | 2.24045723    | 2.18983117    | 1.22004186     | 1.15165539     | 1.29722426     | 9.689E-15 | -1.93007 | down      | -                                                                                         |
| c42385.graph_c0 | 69.4182426    | 60.1528676    | 70.25138      | 35.3065709     | 36.2184985     | 40.0403629     | 9.789E-35 | -1.93143 | down      | PREDICTED: uncharacterized protein LOC105170258 [Sesamum indicum]                         |
| c42387.graph_c0 | 88.5108245    | 85.3409809    | 88.8007943    | 75.9557228     | 75.1724744     | 81.0639309     | 7.682E-55 | -1.26819 | down      | PREDICTED: homogentisate 1,2-dioxygenase isoform X1 [Sesamum indicum]                     |
| c42388.graph_c0 | 0             | 0             | 0             | 1.70899358     | 2.00026422     | 1.34287574     | 1.418E-14 | Inf      | up        | PREDICTED: ATP-citrate synthase beta chain protein 2-like [Citrus sinensis]               |
| c42389.graph_c0 | 2.31305633    | 2.36880418    | 2.76658957    | 13.0480466     | 12.8436858     | 12.1138455     | 6.011E-24 | 1.25797  | up        | PREDICTED: protein FAR1-RELATED SEQUENCE 3-like [Sesamum indicum]                         |
| c42390.graph_c0 | 0.95799343    | 1.66774386    | 1.76630275    | 13.138201      | 11.397901      | 11.9804663     | 1.771E-20 | 1.9591   | up        | hypothetical protein JCGZ_15647 [Jatropha curcas]                                         |
| c42391.graph_c0 | 14.5398584    | 12.8320016    | 12.3824905    | 2.87635695     | 2.70999719     | 3.26550787     | 4.626E-54 | -3.25499 | down      | -                                                                                         |
| c42395.graph_c0 | 0             | 0.18019828    | 0.28916286    | 2.32234009     | 2.21498806     | 1.86832026     | 2.67E-08  | 2.65798  | up        | PREDICTED: tetraketide alpha-pyrone reductase 1-like [Sesamum indicum]                    |
| c42396.graph_c0 | 19.2956679    | 21.0623114    | 19.8244327    | 14.1611341     | 13.683995      | 13.8216771     | 7.731E-46 | -1.62109 | down      | BnaA08g23740D [Brassica napus]                                                            |
| c42401.graph_c0 | 2.28542801    | 2.94688908    | 3.03642024    | 1.57657645     | 1.39808106     | 1.03377336     | 7.156E-14 | -2.13963 | down      | PREDICTED: serine/threonine-protein kinase BLUS1-like isoform X2 [Sesamum indicum]        |
| c42402.graph_c0 | 0.28747763    | 0.95921833    | 0.61570023    | 10.4468543     | 11.3504777     | 11.593385      | 6.061E-28 | 3.07001  | up        | PREDICTED: transcription factor bHLH/1-like [Nicotiana glauca]                            |
| c42403.graph_c0 | 0.90646604    | 0.63516161    | 1.04836027    | 11.6280723     | 10.974937      | 12.1763474     | 2.757E-26 | 2.65395  | up        | PREDICTED: LOW QUALITY PROTEIN; protein YIF1B-like [Sesamum indicum]                      |
| c42407.graph_c0 | 10.3476127    | 11.0485059    | 11.0316615    | 7.24204509     | 8.09816093     | 8.40960143     | 4.526E-16 | -1.54017 | down      | PREDICTED: myb family transcription factor APL-like [Sesamum indicum]                     |
| c42407.graph_c1 | 8.97683436    | 8.32992379    | 7.49392184    | 6.42906605     | 3.99889244     | 6.17869924     | 5.027E-17 | -1.66576 | down      | PREDICTED: protein ENDOSPERM DEFECTIVE 1-like [Sesamum indicum]                           |
| c42409.graph_c0 | 51.6321754    | 46.8900103    | 54.6180482    | 350.133592     | 356.240199     | 362.924031     | 1.34E-104 | 1.71225  | up        | PREDICTED: 60S ribosomal protein L5-like [Sesamum indicum]                                |
| c42413.graph_c0 | 560.082674    | 502.626025    | 566.234461    | 428.57195      | 499.410286     | 475.07777      | 6.196E-28 | -1.3064  | down      | PREDICTED: extra-large guanine nucleotide-binding protein 3-like [Sesamum indicum]        |
| c42414.graph_c0 | 3.66399016    | 3.00544287    | 2.8773387     | 15.5709594     | 13.3912249     | 12.4039758     | 2.2E-07   | 1.02694  | up        | PREDICTED: paired amphipathic helix protein Sin3-like 2 isoform X1 [Sesamum indicum]      |
| c42426.graph_c0 | 14.681265     | 14.9537901    | 14.6873518    | 13.1272263     | 13.2470845     | 13.0029842     | 1.494E-31 | -1.26125 | down      | PREDICTED: uncharacterized membrane protein At3g27390 [Sesamum indicum]                   |
| c42427.graph_c0 | 6.4723034     | 3.23939222    | 3.366472      | 0              | 0              | 0              | 1.738E-14 | -Inf     | down      | PREDICTED: serpin-ZX-like [Malus domestica]                                               |
| c42432.graph_c0 | 0.06562578    | 0.11496011    | 0.08433172    | 1.28780376     | 0.93667265     | 1.00218747     | 1.438E-08 | 2.5145   | up        | PREDICTED: uncharacterized protein LOC105330039 [Prunus mume]                             |
| c42437.graph_c0 | 2.68665745    | 3.41619847    | 3.07922215    | 2.13735702     | 2.00130829     | 2.1962311      | 3.161E-11 | -1.62672 | down      | PREDICTED: post-GPI attachment to proteins factor 3 [Sesamum indicum]                     |
| c42439.graph_c0 | 4.87239703    | 5.51279984    | 4.45874978    | 97.4911372     | 140.879326     | 93.8336742     | 6.467E-16 | 3.39362  | up        | PREDICTED: probable serine/threonine-protein kinase At1g54610 [Nicotiana tomentosiformis] |

| #ID             | 0 h-1<br>FPKM | 0 h-2<br>FPKM | 0 h-3<br>FPKM | 28 h-1<br>FPKM | 28 h-2<br>FPKM | 28 h-3<br>FPKM | FDR       | log2FC   | regulated | nr_annotation                                                                                                            |
|-----------------|---------------|---------------|---------------|----------------|----------------|----------------|-----------|----------|-----------|--------------------------------------------------------------------------------------------------------------------------|
| c42441.graph_c0 | 26.6614838    | 29.1544158    | 22.6522535    | 22.3938087     | 22.8756661     | 22.1869795     | 1.262E-17 | -1.30648 | down      | PREDICTED: uncharacterized protein LOC105162071 [Sesamum indicum]                                                        |
| c42442.graph_c0 | 1.80249619    | 2.49418096    | 1.97564971    | 17.0691007     | 15.4117975     | 14.5570615     | 4.636E-18 | 1.81565  | up        | PREDICTED: uncharacterized protein LOC101292603 isoform 2 [Fragaria vesca subsp. vesca]                                  |
| c42445.graph_c0 | 2.81482136    | 2.96593682    | 2.63065956    | 36.1978631     | 35.3700575     | 33.7145363     | 5.29E-159 | 2.556    | up        | PREDICTED: ABC transporter B family member 1-like [Sesamum indicum]                                                      |
| c42449.graph_c0 | 2.75377124    | 2.65808127    | 3.12796251    | 22.0514154     | 26.7999263     | 21.6683546     | 3.04E-25  | 1.95259  | up        | PREDICTED: heme-binding protein 2-like [Sesamum indicum]                                                                 |
| c42450.graph_c0 | 2.47121235    | 3.21579296    | 2.06414371    | 9.87834591     | 12.4869082     | 14.2893334     | 0.0003644 | 1.15495  | up        | PREDICTED: protein PLANT CADMIUM RESISTANCE 2-like [Nicotiana tomentosiformis]                                           |
| c42453.graph_c0 | 0.0700688     | 0.03506948    | 0             | 1.22221446     | 1.5633555      | 1.3713109      | 4.031E-11 | 4.23832  | up        | hypothetical protein MIMGU_mgv1a0061 /8mg [Erythranae miffata]                                                           |
| c42460.graph_c0 | 3.42680096    | 2.52017073    | 3.14541065    | 0              | 0              | 0              | 6.964E-43 | -Inf     | down      | hypothetical protein [Dendrobium catenatum]                                                                              |
| c42462.graph_c0 | 0             | 0             | 0             | 1.02934531     | 1.3708684      | 1.80586533     | 3.072E-10 | Inf      | up        | PREDICTED: 65-kDa microtubule-associated protein 8 isoform X1 [Sesamum indicum]                                          |
| c42463.graph_c0 | 19.3639746    | 20.1828797    | 19.4261326    | 19.3264571     | 19.2908556     | 19.0629168     | 5.336E-38 | -1.12251 | down      | PREDICTED: TBC1 domain family member 5 homolog A-like [Sesamum indicum]                                                  |
| c42465.graph_c0 | 12.1460642    | 14.2561167    | 11.1705554    | 7.68528257     | 8.39254756     | 7.81066145     | 1.902E-22 | -1.7426  | down      | PREDICTED: uncharacterized protein LOC105168867 isoform X1 [Sesamum indicum]                                             |
| c42465.graph_c1 | 1.43261352    | 2.02070409    | 2.00832555    | 20.0433935     | 22.8620029     | 18.9041148     | 7.911E-42 | 2.40588  | up        | PREDICTED: transcription factor bHLH95-like [Nicotiana sylvestris]                                                       |
| c42466.graph_c0 | 0.79630752    | 0.76644702    | 0.94457233    | 0.6010114      | 0.50246013     | 0.81736732     | 0.0001102 | -1.47531 | down      | PREDICTED: TSL-kinase interacting protein 1 isoform X2 [Sesamum indicum]                                                 |
| c42472.graph_c0 | 48.0496938    | 44.8838994    | 40.2627875    | 3.70143563     | 5.30368698     | 4.39919269     | 6.12E-196 | -4.40163 | down      | -                                                                                                                        |
| c42475.graph_c0 | 0             | 0             | 0             | 1.88662038     | 2.70201037     | 3.8752096      | 3.869E-07 | Inf      | up        | --                                                                                                                       |
| c42478.graph_c0 | 0.35313514    | 0.45448553    | 0.25931008    | 3.29987034     | 3.07878931     | 2.84225988     | 2.76E-06  | 2.0248   | up        | PREDICTED: pentatricopeptide repeat-containing protein At4g21170 [Sesamum indicum]                                       |
| c42478.graph_c1 | 0.65361224    | 0.55612672    | 0.79792172    | 4.60790359     | 5.4043672      | 4.74846838     | 2.922E-10 | 1.78392  | up        | PREDICTED: pentatricopeptide repeat-containing protein At3g16610 [Sesamum indicum]                                       |
| c42481.graph_c0 | 0.14125679    | 0.25451683    | 0.2541288     | 1.86849614     | 1.9280878      | 1.87652627     | 6.435E-07 | 2.02979  | up        | hypothetical protein PGTG_21261 [Puccinia graminis f. sp. tritici CRL 75-36-700-3]                                       |
| c42487.graph_c1 | 0.18445075    | 0.2051505     | 0.1316814     | 4.02173221     | 3.2681224      | 3.69495183     | 9.704E-24 | 3.31143  | up        | PREDICTED: bifunctional acetylcholinesterase/ L-D-aminopelargonic acid aminotransferase, mitochondrial [Sesamum indicum] |
| c42491.graph_c0 | 7.94474307    | 7.4203003     | 8.24433771    | 43.4876496     | 46.4857171     | 48.6743693     | 2.439E-48 | 1.46306  | up        | PREDICTED: bidirectional sugar transporter SWEET3b [Sesamum indicum]                                                     |
| c42492.graph_c0 | 13.8314218    | 14.6004686    | 11.5415095    | 9.03428259     | 10.5382319     | 9.01246834     | 9.954E-25 | -1.57239 | down      | PREDICTED: uncharacterized protein At5g01610 [Sesamum indicum]                                                           |
| c42493.graph_c0 | 0.25370258    | 0.15872289    | 0.2445134     | 1.79779836     | 1.20702711     | 1.61744917     | 6.946E-05 | 1.72421  | up        | PREDICTED: MATE efflux family protein 1 [Sesamum indicum]                                                                |
| c42494.graph_c1 | 1.35584778    | 1.53423226    | 1.36355328    | 0.81404455     | 0.61895234     | 0.55937154     | 2.616E-08 | -2.18533 | down      | Transcription factor jumonji domain-containing protein, putative isoform 9 [Theobroma cacao]                             |

| #ID             | 0 h-1<br>FPKM | 0 h-2<br>FPKM | 0 h-3<br>FPKM | 28 h-1<br>FPKM | 28 h-2<br>FPKM | 28 h-3<br>FPKM | FDR       | log2FC   | regulated | nr_annotation                                                                                               |
|-----------------|---------------|---------------|---------------|----------------|----------------|----------------|-----------|----------|-----------|-------------------------------------------------------------------------------------------------------------|
| c42496.graph_c0 | 31.472329     | 30.1165185    | 30.3509435    | 20.6914428     | 22.5856591     | 23.4595803     | 2.245E-49 | -1.55208 | down      | hypothetical protein MIMGU_mgv1a01337/mg [Erythranthe outtata]                                              |
| c42499.graph_c0 | 0.07723091    | 0.27057886    | 0             | 3.22753142     | 2.61007218     | 2.63363928     | 1.728E-12 | 3.52928  | up        | PREDICTED: protein PHK1-LIKE 1-like isoform X1 [Sesamum indicum]                                            |
| c42500.graph_c0 | 0             | 0             | 0             | 0.91417803     | 1.11365792     | 1.13670371     | 7.562E-17 | Inf      | up        | PREDICTED: LOW QUALITY PROTEIN: intracellular protein transport protein USO1-like [Sesamum indicum]         |
| c42503.graph_c0 | 14.305093     | 13.9216558    | 13.0720789    | 6.87347911     | 8.6051066      | 8.15382848     | 5.574E-27 | -1.89471 | down      | -                                                                                                           |
| c42504.graph_c0 | 2.0602098     | 2.64228701    | 2.19242049    | 1.84828969     | 1.85895243     | 1.5654623      | 8.133E-09 | -1.47836 | down      | PREDICTED: crossover junction endonuclease EME1B-like isoform X1 [Sesamum indicum]                          |
| c42506.graph_c0 | 92.2368761    | 103.075513    | 94.2908575    | 2.43381294     | 2.84382986     | 2.07358787     | 0         | -6.39171 | down      | PREDICTED: mitogen-activated protein kinase kinase kinase 2-like [Sesamum indicum]                          |
| c42509.graph_c0 | 0.94924966    | 1.4823123     | 0.97585872    | 0.35875278     | 0.52325558     | 0.4278498      | 3.903E-08 | -2.46923 | down      | PREDICTED: putative late blight resistance protein homolog RIB-14 [Sesamum indicum]                         |
| c42517.graph_c0 | 0.94358399    | 1.46401971    | 1.27316993    | 1.57732024     | 1.05264908     | 1.09122037     | 0.0035218 | -1.07762 | down      | PREDICTED: beta-carotene isomerase D27, chloroplastic [Sesamum indicum]                                     |
| c42517.graph_c1 | 6.91811984    | 5.26037246    | 4.9579169     | 27.6059263     | 28.8106334     | 27.9309229     | 1.065E-13 | 1.21239  | up        | hypothetical protein MIMGU_mgv1a01746/mg [Erythranthe outtata]                                              |
| c42520.graph_c1 | 37.4656734    | 39.2756967    | 33.5426202    | 36.9329526     | 37.4516246     | 36.1810063     | 2.566E-39 | -1.08544 | down      | PREDICTED: uncharacterized protein LOC105178356 [Sesamum indicum]                                           |
| c42522.graph_c0 | 0.11349594    | 0.03786986    | 0.04861559    | 0.59116537     | 0.71996466     | 0.50482268     | 2.313E-05 | 2.10057  | up        | hypothetical protein MIMGU_mgv1a005054/mg [Erythranthe outtata]                                             |
| c42524.graph_c0 | 8.12616914    | 8.90322079    | 7.58506251    | 56.4160277     | 58.8975059     | 55.9852952     | 3.801E-61 | 1.70937  | up        | TIN15.23 [Arabidopsis thaliana]                                                                             |
| c42526.graph_c0 | 32.915255     | 30.4137366    | 34.3666422    | 23.5009048     | 23.3998708     | 23.0556521     | 1.56E-40  | -1.57329 | down      | PREDICTED: BII-like protein [Sesamum indicum]                                                               |
| c42531.graph_c0 | 0.02069566    | 0.04143276    | 0.07978421    | 1.83506094     | 1.45317224     | 1.05554055     | 1.286E-09 | 3.82826  | up        | PREDICTED: probable LRR receptor-like serine/threonine-protein kinase MRH1 isoform X1 [Sesamum indicum]     |
| c42536.graph_c0 | 10.8401826    | 12.1836209    | 12.3008165    | 57.1773129     | 58.4481729     | 54.7768841     | 2.467E-25 | 1.17805  | up        | PREDICTED: signal peptidase complex subunit 3B-like [Sesamum indicum]                                       |
| c42537.graph_c0 | 18.8283772    | 17.2151643    | 16.7613779    | 10.813034      | 12.3454026     | 12.0309922     | 5.905E-82 | -1.67471 | down      | PREDICTED: uncharacterized protein LOC105178386 [Sesamum indicum]                                           |
| c42538.graph_c0 | 8.43460466    | 7.9057656     | 8.57250619    | 38.0352414     | 42.0158014     | 42.3596334     | 1.04E-29  | 1.20599  | up        | PREDICTED: triose phosphate/phosphate translocator, non-green plastid, chloroplastic-like [Sesamum indicum] |
| c42542.graph_c0 | 18.1468028    | 17.8972797    | 17.6981669    | 12.8280298     | 12.3722246     | 12.166848      | 9.988E-72 | -1.61468 | down      | PREDICTED: mitogen-activated protein kinase kinase kinase 2-like [Sesamum indicum]                          |
| c42544.graph_c0 | 1.22657794    | 1.07746256    | 0.93285378    | 5.47617149     | 4.74734771     | 5.18109773     | 5.376E-07 | 1.16357  | up        | PREDICTED: non-lysosomal glucosylceramidase isoform X3 [Sesamum indicum]                                    |
| c42546.graph_c0 | 89.9819463    | 86.4951812    | 91.7320303    | 390.147256     | 409.609605     | 419.884434     | 5.098E-44 | 1.09429  | up        | PREDICTED: 40S ribosomal protein S9-2-like [Sesamum indicum]                                                |
| c42549.graph_c0 | 21.9241144    | 23.6924395    | 20.9245077    | 131.997033     | 136.468478     | 127.677512     | 1.001E-61 | 1.48372  | up        | hypothetical protein M569_16894, partial [Genlisea aurea]                                                   |
| c42549.graph_c1 | 21.9392806    | 21.7048925    | 23.3660538    | 133.705111     | 124.532542     | 125.303081     | 3.727E-48 | 1.42541  | up        | hypothetical protein M569_06257, partial [Genlisea aurea]                                                   |
| c42554.graph_c0 | 26.900506     | 26.2749199    | 28.9836893    | 20.6566087     | 20.0198602     | 16.855624      | 1.163E-38 | -1.60653 | down      | PREDICTED: protein REVEILLE 6 isoform X2 [Sesamum indicum]                                                  |

| #ID             | 0 h-1<br>FPKM | 0 h-2<br>FPKM | 0 h-3<br>FPKM | 28 h-1<br>FPKM | 28 h-2<br>FPKM | 28 h-3<br>FPKM | FDR       | log2FC   | regulated | nr_annotation                                                                                    |
|-----------------|---------------|---------------|---------------|----------------|----------------|----------------|-----------|----------|-----------|--------------------------------------------------------------------------------------------------|
| c42556.graph_c0 | 1263.48934    | 1254.2425     | 1261.84737    | 636.66845      | 652.304681     | 682.790339     | 2.61E-63  | -2.02903 | down      | PREDICTED: LOW QUALITY PROTEIN: low-temperature-induced 65 kDa protein [Sesamum indicum]         |
| c42557.graph_c1 | 0.03129634    | 0.09398302    | 0             | 1.38750577     | 1.0474126      | 1.24355666     | 3.878E-10 | 3.80023  | up        | PREDICTED: MLO-like protein 11 [Sesamum indicum]                                                 |
| c42559.graph_c0 | 0.25652133    | 0.19971637    | 0.36626673    | 4.43308658     | 3.609877       | 4.39492634     | 2.039E-17 | 2.82268  | up        | PREDICTED: caffeoylshikimate esterase [Sesamum indicum]                                          |
| c42560.graph_c0 | 7.36087219    | 7.70535215    | 7.32609768    | 5.36732262     | 5.03561668     | 5.17859279     | 9.37E-36  | -1.61348 | down      | hypothetical protein PRUPE_ppa004658mg [Prunus persica]                                          |
| c42560.graph_c1 | 3.32325057    | 3.85883083    | 3.75804753    | 1.93225549     | 1.74464554     | 3.3899151      | 6.663E-06 | -1.71898 | down      | PREDICTED: probable folate-bioperin transporter 2 [Sesamum indicum]                              |
| c42561.graph_c0 | 19.6541767    | 20.2197469    | 20.9956049    | 135.806204     | 122.663214     | 125.228365     | 2.041E-78 | 1.56477  | up        | PREDICTED: probable WRKY transcription factor 4 [Sesamum indicum]                                |
| c42562.graph_c0 | 9.62075456    | 9.87668979    | 8.82171635    | 8.69120757     | 9.41358531     | 9.67482668     | 5.38E-23  | -1.11684 | down      | PREDICTED: NADPH-dependent diflavin oxidoreductase 1 isoform X1 [Sesamum indicum]                |
| c42564.graph_c0 | 16.0732871    | 16.3873335    | 16.9573442    | 4.18243456     | 2.53926732     | 2.82441306     | 5.935E-63 | -3.4636  | down      | PREDICTED: uncharacterized protein LOC103940260 [Pyrus x bretschneideri]                         |
| c42565.graph_c0 | 1.23026906    | 0.76552764    | 0.64092343    | 6.37989867     | 6.72052538     | 6.21163917     | 8.916E-12 | 1.78927  | up        | Mitochondrial transcription termination factor family protein [Theobroma cacao]                  |
| c42569.graph_c0 | 4.37158891    | 4.37596639    | 3.32174964    | 24.920657      | 22.6506909     | 22.5444042     | 6.969E-25 | 1.45118  | up        | PREDICTED: probable leucine-rich repeat receptor-like protein kinase At1g35710 [Sesamum indicum] |
| c42571.graph_c0 | 14.1956888    | 12.949547     | 13.2294317    | 72.6161641     | 76.1934666     | 71.3627269     | 2.162E-58 | 1.35701  | up        | hypothetical protein MIMGU_mgv1a020880mg [Erythranthe diffusa]                                   |
| c42575.graph_c0 | 2.52917444    | 1.7322206     | 2.00992364    | 1.7656293      | 1.87809594     | 1.85519828     | 1.777E-06 | -1.27794 | down      | PREDICTED: nucleobase-ascorbate transporter 2 [Sesamum indicum]                                  |
| c42588.graph_c0 | 2.71037449    | 1.92177104    | 2.08008829    | 17.9751966     | 18.601412      | 18.7754385     | 9.134E-32 | 1.95605  | up        | PREDICTED: alpha-galactosidase-like [Sesamum indicum]                                            |
| c42589.graph_c0 | 35.5341043    | 35.5248034    | 32.0935534    | 14.8927115     | 13.490858      | 14.1865833     | 1.12E-167 | -2.36599 | down      | hypothetical protein M569_03173, partial [Genlisea aurea]                                        |
| c42592.graph_c1 | 233.05321     | 226.491291    | 245.03122     | 156.211574     | 149.91806      | 151.78552      | 8.314E-69 | -1.71299 | down      | hypothetical protein MIMGU_mgv1a008823mg [Erythranthe diffusa]                                   |
| c42595.graph_c0 | 1.59394858    | 1.50690331    | 1.650009      | 0.28961816     | 0.3777194      | 0.23632605     | 2.237E-18 | -3.48734 | down      | -                                                                                                |
| c42595.graph_c1 | 61.3563007    | 62.5279665    | 62.7683648    | 48.9140973     | 44.7471093     | 46.5701397     | 9.327E-71 | -1.50329 | down      | PREDICTED: ABSCISIC ACID-INSENSITIVE 5-like protein 6 isoform X2 [Sesamum indicum]               |
| c42597.graph_c0 | 5.93219562    | 5.26589403    | 6.9998334     | 172.405191     | 146.019247     | 152.983644     | 3.33E-103 | 3.60186  | up        | hypothetical protein MIMGU_mgv1a007920mg [Erythranthe diffusa]                                   |
| c42598.graph_c1 | 29.7761856    | 29.6310156    | 27.2562469    | 24.6057025     | 25.4478064     | 25.1062049     | 1.096E-49 | -1.29488 | down      | PREDICTED: mechanosensitive ion channel protein 1, mitochondrial-like [Sesamum indicum]          |
| c42599.graph_c0 | 27.4138918    | 25.7845069    | 22.9092366    | 15.0121143     | 16.4962498     | 14.9492096     | 5.179E-70 | -1.80082 | down      | -                                                                                                |
| c42602.graph_c0 | 0.1963911     | 0.27522286    | 0.35331847    | 2.82617121     | 2.21668702     | 2.63225239     | 3.082E-07 | 2.12093  | up        | PREDICTED: uncharacterized protein LOC105171438 isoform X1 [Sesamum indicum]                     |
| c42604.graph_c0 | 3.37282137    | 3.14600337    | 3.4279653     | 2.45134713     | 3.16909562     | 2.9004049      | 3.331E-18 | -1.31428 | down      | PREDICTED: uncharacterized protein LOC105176546 [Sesamum indicum]                                |
| c42605.graph_c0 | 3.02388081    | 2.07104284    | 2.40306459    | 11.046531      | 13.3160489     | 12.1758157     | 2.102E-10 | 1.19632  | up        | -                                                                                                |
| c42613.graph_c0 | 157.675664    | 174.582388    | 159.039181    | 91.984743      | 97.3004327     | 87.4831729     | 2.092E-89 | -1.9187  | down      | hypothetical protein MIMGU_mgv1a008930mg [Erythranthe diffusa]                                   |
| c42615.graph_c0 | 1.66856052    | 1.48114854    | 1.94188648    | 8.16856528     | 8.90425304     | 9.27939729     | 5.064E-11 | 1.27903  | up        | hypothetical protein MIMGU_mgv1a007358mg [Erythranthe diffusa]                                   |



| #ID             | 0 h-1<br>FPKM | 0 h-2<br>FPKM | 0 h-3<br>FPKM | 28 h-1<br>FPKM | 28 h-2<br>FPKM | 28 h-3<br>FPKM | FDR       | log2FC   | regulated | nr_annotation                                                                                                     |
|-----------------|---------------|---------------|---------------|----------------|----------------|----------------|-----------|----------|-----------|-------------------------------------------------------------------------------------------------------------------|
| c42619.graph_c0 | 1.46118793    | 1.15651482    | 1.00434279    | 16.2014146     | 16.2785085     | 16.6461942     | 1.209E-46 | 2.67551  | up        | PREDICTED: uncharacterized protein LOC105434215 [Morus domestical]                                                |
| c42624.graph_c0 | 0.1111824     | 0             | 0.22859806    | 5.34940542     | 5.67635798     | 4.91894724     | 1.703E-41 | 4.44451  | up        | PREDICTED: uncharacterized protein LOC105179248 isoform X1 [Sesamum indicum]                                      |
| c42629.graph_c0 | 0.18594783    | 0.17450065    | 0.13440956    | 0.86155455     | 1.11346898     | 1.40604296     | 4.254E-05 | 1.68741  | up        | PREDICTED: DNA polymerase alpha catalytic subunit [Sesamum indicum]                                               |
| c42630.graph_c0 | 1.25021141    | 1.0092446     | 1.14014728    | 13.2486514     | 13.6296004     | 12.7959588     | 1.081E-29 | 2.45463  | up        | PREDICTED: uncharacterized protein LOC101231346, partial [Cucumis sativus]                                        |
| c42633.graph_c0 | 35.0491982    | 33.1463051    | 32.5143071    | 3.88168461     | 3.85527699     | 3.84050032     | 0         | -4.21055 | down      | PREDICTED: probable leucine-rich repeat receptor-like serine/threonine-protein kinase At5g15730 [Sesamum indicum] |
| c42636.graph_c0 | 21.2249058    | 19.1262543    | 22.9205454    | 727.628069     | 694.626637     | 672.390152     | 0         | 3.95686  | up        | hypothetical protein MIMGU_mgv1a009141mg [Erythranthe guttata]                                                    |
| c42641.graph_c0 | 4.55662471    | 4.91753025    | 4.39158237    | 21.1640154     | 19.7865844     | 19.0853008     | 7.246E-14 | 1.02419  | up        | PREDICTED: uncharacterized GPI-anchored protein At1g61900-like [Sesamum indicum]                                  |
| c42642.graph_c0 | 585.482624    | 572.994012    | 617.057386    | 242.555045     | 249.555431     | 266.125963     | 1.95E-103 | -2.3185  | down      | PREDICTED: leucine-rich repeat receptor-like protein kinase PXL1 [Sesamum indicum]                                |
| c42644.graph_c0 | 0.61175993    | 0.30618626    | 0.78613572    | 10.0040307     | 14.8537763     | 10.7028719     | 2.519E-09 | 3.28591  | up        | -                                                                                                                 |
| c42644.graph_c1 | 55.9377296    | 58.82255      | 50.1199421    | 19.0892264     | 19.2811671     | 19.877485      | 9.36E-121 | -2.58996 | down      | PREDICTED: scarecrow-like protein 14 [Sesamum indicum]                                                            |
| c42649.graph_c0 | 2.29513172    | 1.88829859    | 2.06049441    | 1.48528429     | 1.52675941     | 1.56625088     | 1.076E-08 | -1.53709 | down      | hypothetical protein JCGZ_16864 [Jatropha curcas]                                                                 |
| c42653.graph_c0 | 0.13414578    | 0.1342801     | 0             | 2.22291738     | 2.25357022     | 1.67068119     | 1.809E-12 | 3.44565  | up        | PREDICTED: protein trichome birefringence-like 14 [Sesamum indicum]                                               |
| c42659.graph_c0 | 0.27310139    | 0.18224991    | 0.29245509    | 5.29302718     | 4.77910727     | 5.45282203     | 1.475E-16 | 3.28359  | up        | hypothetical protein MIMGU_mgv1a021608mg, partial [Erythranthe guttata]                                           |
| c42665.graph_c0 | 2.34147002    | 2.27487892    | 2.25666125    | 24.6756202     | 23.2288084     | 21.1357335     | 3.431E-51 | 2.23775  | up        | PREDICTED: uncharacterized protein LOC105168054 [Sesamum indicum]                                                 |
| c42669.graph_c0 | 19.0756285    | 15.4865284    | 16.1506647    | 337.953774     | 300.953968     | 337.383408     | 4.37E-133 | 3.1784   | up        | PREDICTED: zeaxanthin epoxidase, chloroplastic-like [Sesamum indicum]                                             |
| c42676.graph_c0 | 18.9072705    | 21.1725374    | 17.2809236    | 10.1389124     | 10.0776289     | 10.3291723     | 2.873E-43 | -1.99804 | down      | PREDICTED: uncharacterized protein At1g04910 [Sesamum indicum]                                                    |
| c42680.graph_c1 | 99.6258533    | 92.3567258    | 86.7151985    | 36.5604352     | 34.6209205     | 36.3817275     | 1.507E-83 | -2.46228 | down      | PREDICTED: alpha,alpha-trehalose-phosphate synthase [UDP-forming] 6 [Solanum lycopersicum]                        |
| c42680.graph_c2 | 39.1565275    | 40.7807795    | 40.8986589    | 19.4602573     | 20.5329489     | 19.363788      | 3.57E-140 | -2.11677 | down      | PREDICTED: nuclear pore complex protein GP210 [Sesamum indicum]                                                   |
| c42680.graph_c3 | 154.441695    | 154.307919    | 167.731442    | 64.2071504     | 64.8178638     | 64.7302118     | 1.456E-78 | -2.38985 | down      | PREDICTED: alpha,alpha-trehalose-phosphate synthase [UDP-forming] 6 [Sesamum indicum]                             |
| c42683.graph_c1 | 52.0569167    | 53.0425934    | 51.3153725    | 47.4781937     | 50.2402683     | 46.4600132     | 4.327E-46 | -1.20812 | down      | hypothetical protein PRUPE_ppa012854mg [Prunus persica]                                                           |
| c42686.graph_c0 | 46.7055174    | 44.6532037    | 44.0951797    | 33.9453008     | 32.1923202     | 32.7489901     | 1.068E-58 | -1.54386 | down      | unnamed protein product [Coffea canephora]                                                                        |
| c42690.graph_c0 | 30.0734074    | 28.976493     | 29.7361089    | 15.6768734     | 16.2157401     | 15.2873826     | 2.77E-107 | -2.0029  | down      | PREDICTED: probable polyamine oxidase 2 isoform X1 [Sesamum indicum]                                              |
| c42691.graph_c0 | 0.69246996    | 0.83179604    | 0.62289592    | 4.84410056     | 4.5441752      | 4.15808398     | 4.949E-13 | 1.56822  | up        | PREDICTED: pentatricopeptide repeat-containing protein At5g46100 [Sesamum indicum]                                |

| #ID             | 0 h-1<br>FPKM | 0 h-2<br>FPKM | 0 h-3<br>FPKM | 28 h-1<br>FPKM | 28 h-2<br>FPKM | 28 h-3<br>FPKM | FDR       | log2FC   | regulated | nr_annotation                                                                                     |
|-----------------|---------------|---------------|---------------|----------------|----------------|----------------|-----------|----------|-----------|---------------------------------------------------------------------------------------------------|
| c42692.graph_c0 | 64.9675728    | 62.6078029    | 64.7023343    | 63.887801      | 63.236817      | 60.7586746     | 1.484E-41 | -1.12416 | down      | PREDICTED: multiple C2 and transmembrane domain-containing protein 1 [Sesamum indicum]            |
| c42694.graph_c0 | 0.85502949    | 0.76579245    | 0.4915446     | 75.7164015     | 72.2038721     | 66.1208527     | 3.7E-274  | 5.5784   | up        | hypothetical protein MIMGU_mgv1a002094mg [Erythranthe diffusa]                                    |
| c42695.graph_c0 | 0             | 0             | 0             | 1.56013175     | 1.96469981     | 1.139049       | 1.077E-10 | Inf      | up        | PREDICTED: dehydrodolichyl diphosphate synthase 2-like [Glycine max]                              |
| c42698.graph_c0 | 3.78177587    | 4.48087018    | 2.90922715    | 0.54223547     | 0.60776415     | 0.51874587     | 1.751E-22 | -3.83048 | down      | hypothetical protein MIMGU_mgv1a010940mg [Erythranthe diffusa]                                    |
| c42706.graph_c0 | 1.52113436    | 1.38423413    | 2.19165337    | 15.6117298     | 14.7311525     | 16.9762797     | 1.818E-26 | 2.11924  | up        | PREDICTED: uncharacterized protein LOC105176645 [Sesamum indicum]                                 |
| c42707.graph_c0 | 0.03246437    | 0.06499377    | 0             | 1.95837838     | 1.34215205     | 1.46324793     | 1.673E-12 | 4.53685  | up        | PREDICTED: uncharacterized protein LOC105170754 [Sesamum indicum]                                 |
| c42707.graph_c1 | 40.6117638    | 39.1322234    | 42.732695     | 10.4858376     | 9.17562045     | 10.0160632     | 5.05E-140 | -3.13621 | down      | PREDICTED: uncharacterized protein LOC105175855 [Sesamum indicum]                                 |
| c42708.graph_c0 | 11.8608327    | 5.03462997    | 4.05157507    | 0              | 0              | 0              | 4.67E-09  | -Inf     | down      | PREDICTED: ribulose biphosphate carboxylase small chain, chloroplastic-like [Phoenix dactylifera] |
| c42709.graph_c0 | 1.2109541     | 0.89594929    | 0.60891807    | 4.68756614     | 4.49156125     | 3.74695414     | 1.323E-05 | 1.16728  | up        | PREDICTED: two-component response regulator-like APRR5 [Sesamum indicum]                          |
| c42710.graph_c0 | 53.80395      | 55.4573044    | 45.4090252    | 33.5452552     | 35.066952      | 33.3070209     | 1.132E-39 | -1.69022 | down      | PREDICTED: cysteine-rich receptor-like protein kinase 10 [Sesamum indicum]                        |
| c42713.graph_c1 | 100.954797    | 95.7371566    | 93.8120854    | 89.2283204     | 89.5273659     | 88.8760655     | 5.264E-51 | -1.20806 | down      | PREDICTED: probable CCR4-associated factor 1 homolog 7 [Sesamum indicum]                          |
| c42715.graph_c0 | 3.82392509    | 5.67563549    | 3.89722717    | 20.2211247     | 16.8733035     | 19.9410878     | 0.0002036 | 1.00094  | up        | -                                                                                                 |
| c42720.graph_c0 | 74.3202553    | 73.2753577    | 69.5371078    | 8.85262635     | 7.62619557     | 7.67366997     | 0         | -4.25824 | down      | PREDICTED: mitochondrial carrier protein MTM1-like [Sesamum indicum]                              |
| c42722.graph_c0 | 19.5932882    | 20.6451663    | 16.6970897    | 17.2007701     | 16.7487754     | 17.1853085     | 8.097E-25 | -1.24328 | down      | PREDICTED: DNA-directed RNA polymerase II subunit 1 [Sesamum indicum]                             |
| c42722.graph_c1 | 28.2533191    | 29.3702851    | 24.8801804    | 27.2662111     | 27.8736316     | 28.0256668     | 4.963E-34 | -1.0772  | down      | PREDICTED: DNA-directed RNA polymerase II subunit 1 [Sesamum indicum]                             |
| c42724.graph_c0 | 0.45369634    | 0.51470406    | 0.4664142     | 1.84656574     | 2.18333727     | 2.24223596     | 0.0042189 | 1.03794  | up        | PREDICTED: U-box domain-containing protein 11-like [Sesamum indicum]                              |
| c42727.graph_c0 | 0.19755014    | 0.13183197    | 0.08461992    | 2.48869058     | 2.59275491     | 3.20233842     | 3.545E-09 | 3.24273  | up        | -                                                                                                 |
| c42728.graph_c0 | 9.35726117    | 8.38223989    | 7.95247666    | 6.97407236     | 7.47679367     | 7.12821033     | 1.705E-50 | -1.3405  | down      | PREDICTED: G-type lectin S-receptor-like serine/threonine-protein kinase SD2-2 [Sesamum indicum]  |
| c42730.graph_c0 | 2.06079656    | 2.29206681    | 2.64820516    | 0.24962918     | 0.11269587     | 0.37344151     | 3.943E-25 | -4.33961 | down      | PREDICTED: uncharacterized protein LOC104646173 [Solanum lycopersicum]                            |
| c42731.graph_c0 | 33.0929906    | 33.2099919    | 29.4450814    | 22.1337403     | 22.4037472     | 24.9424968     | 9.069E-62 | -1.55111 | down      | PREDICTED: lipase-like [Sesamum indicum]                                                          |

| #ID             | 0 h-1<br>FPKM | 0 h-2<br>FPKM | 0 h-3<br>FPKM | 28 h-1<br>FPKM | 28 h-2<br>FPKM | 28 h-3<br>FPKM | FDR       | log2FC   | regulated | nr_annotation                                                                                           |
|-----------------|---------------|---------------|---------------|----------------|----------------|----------------|-----------|----------|-----------|---------------------------------------------------------------------------------------------------------|
| c42733.graph_c0 | 20.9317812    | 20.3779777    | 24.0809031    | 22.9144916     | 23.909548      | 22.8153213     | 2.881E-10 | -1.0019  | down      | PREDICTED: uncharacterized protein LOC105161097 [Sesamum indicum]                                       |
| c42736.graph_c0 | 0.30251359    | 0.20187767    | 0.21596774    | 7.78078267     | 8.22745158     | 7.11652332     | 2.024E-67 | 3.91702  | up        | PREDICTED: probable polyribonucleotide nucleotidyltransferase 1, chloroplastic-like [Solanum tuberosum] |
| c42737.graph_c0 | 0             | 0             | 0             | 2.24572525     | 2.64724804     | 2.23971424     | 7.128E-14 | Inf      | up        | hypothetical protein MIMGU_mgv1a011219mg [Erythranthe guttata]                                          |
| c42739.graph_c0 | 2.71986182    | 3.27718607    | 2.86945868    | 16.7416174     | 16.3721142     | 16.2299327     | 2.048E-34 | 1.38568  | up        | PREDICTED: nardilysin isoform X1 [Sesamum indicum]                                                      |
| c42741.graph_c0 | 20.6137178    | 20.8071593    | 20.3172726    | 17.3362348     | 16.5525919     | 16.9164533     | 1.364E-63 | -1.37148 | down      | PREDICTED: zinc finger CCCH domain-containing protein 41 [Sesamum indicum]                              |
| c42744.graph_c0 | 21.3280843    | 21.6784565    | 20.508644     | 14.9835397     | 15.1344445     | 13.8941809     | 4.627E-78 | -1.61957 | down      | PREDICTED: MARK-BINDING filament-like protein 1-1 [Sesamum indicum]                                     |
| c42747.graph_c0 | 239.098083    | 246.669119    | 227.588765    | 46.594433      | 41.5781835     | 50.3453422     | 0         | -3.45361 | down      | hypothetical protein MIMGU_mgv1a015419mg [Erythranthe guttata]                                          |
| c42749.graph_c0 | 0.05573454    | 0             | 0             | 2.01187472     | 1.52393812     | 1.4984401      | 5.523E-20 | 5.43766  | up        | -                                                                                                       |
| c42749.graph_c1 | 0.11477048    | 0             | 0             | 9.34242694     | 10.318223      | 10.5501637     | 7.516E-22 | 6.98154  | up        | -                                                                                                       |
| c42751.graph_c0 | 3.09280956    | 2.09722701    | 3.58976505    | 13.4145061     | 13.7488036     | 14.2595498     | 1.592E-05 | 1.14456  | up        | PREDICTED: uncharacterized protein LOC105166611 isoform X2 [Sesamum indicum]                            |
| c42754.graph_c0 | 0.20685667    | 0.37271485    | 0.0531638     | 3.36766605     | 2.93209074     | 3.16509331     | 3.297E-10 | 2.82463  | up        | -                                                                                                       |
| c42755.graph_c0 | 4.00330412    | 3.96950799    | 2.81486273    | 3.40365771     | 3.02361631     | 3.18052161     | 2.9E-08   | -1.25319 | down      | PREDICTED: uncharacterized protein LOC105156766 [Sesamum indicum]                                       |
| c42757.graph_c1 | 2.69903379    | 2.66368383    | 2.00285882    | 11.438308      | 11.4004056     | 11.0018845     | 8.232E-09 | 1.11292  | up        | hypothetical protein MIMGU_mgv1a010/83mg [Erythranthe guttata]                                          |
| c42758.graph_c0 | 0.24055833    | 0.36119882    | 0.92738093    | 3.23447352     | 3.78866118     | 3.49529446     | 0.0001688 | 1.67417  | up        | PREDICTED: uncharacterized protein LOC100262/06 [Vitis vinifera]                                        |
| c42760.graph_c0 | 16.6812682    | 16.9842973    | 15.1205468    | 10.1110827     | 8.72835039     | 9.49971123     | 9.16E-105 | -1.87271 | down      | PREDICTED: protein PHOTOPERIOD-INDEPENDENT EARLY FLOWERING 1 isoform X1 [Sesamum indicum]               |
| c42764.graph_c0 | 2.26045893    | 2.0437493     | 1.40553833    | 16.1109068     | 14.9772954     | 15.4815786     | 2.444E-14 | 1.94308  | up        | PREDICTED: LOW QUALITY PROTEIN: protein IQ-DOMAIN 14 [Sesamum indicum]                                  |
| c42766.graph_c0 | 57.2857277    | 58.8910446    | 57.496092     | 55.7963099     | 51.4387314     | 52.214034      | 1.911E-49 | -1.21385 | down      | PREDICTED: LOW QUALITY PROTEIN: neurofilament heavy polypeptide [Sesamum indicum]                       |
| c42771.graph_c0 | 1.0375451     | 0.99863851    | 1.07688528    | 18.3299884     | 22.3638019     | 19.8323849     | 2.61E-54  | 3.18968  | up        | PREDICTED: uncharacterized protein LOC105176977 [Sesamum indicum]                                       |
| c42773.graph_c0 | 0.08966356    | 0.26926003    | 0.23044244    | 1.62917393     | 1.97112835     | 1.86114967     | 6.265E-06 | 2.11461  | up        | PREDICTED: probable beta-1,3-galactosyltransferase 20 [Sesamum indicum]                                 |
| c42773.graph_c1 | 0             | 0             | 0             | 1.21566706     | 1.14868609     | 1.1534586      | 2.684E-14 | Inf      | up        | PREDICTED: probable beta-1,3-galactosyltransferase 20 [Sesamum indicum]                                 |
| c42774.graph_c0 | 12.4726889    | 11.6455319    | 11.5757049    | 11.3578541     | 10.5303011     | 9.7113054      | 6.347E-40 | -1.26602 | down      | PREDICTED: uncharacterized protein LOC105163756 [Sesamum indicum]                                       |
| c42776.graph_c0 | 1.71231077    | 0.99984815    | 0.97794984    | 0              | 0              | 0              | 1.382E-16 | -Inf     | down      | unnamed protein product [Coffea canephora]                                                              |

| #ID             | 0 h-1<br>FPKM | 0 h-2<br>FPKM | 0 h-3<br>FPKM | 28 h-1<br>FPKM | 28 h-2<br>FPKM | 28 h-3<br>FPKM | FDR       | log2FC   | regulated | nr_annotation                                                                                                         |
|-----------------|---------------|---------------|---------------|----------------|----------------|----------------|-----------|----------|-----------|-----------------------------------------------------------------------------------------------------------------------|
| c42779.graph_c0 | 27.2465449    | 29.8257653    | 27.8465081    | 30.4566793     | 27.0290016     | 30.3331594     | 3.838E-19 | -1.04175 | down      | PREDICTED: serine-threonine kinase receptor-associated protein [Solanum lycopersicum]                                 |
| c42783.graph_c0 | 7.20083563    | 4.83577782    | 5.1537695     | 0              | 0              | 0              | 3.33E-39  | -Inf     | down      | PREDICTED: glycine-rich RNA-binding protein-like isoform X1 [Eucalyptus grandis]                                      |
| c42786.graph_c0 | 6.00304211    | 4.81427073    | 4.73675679    | 33.832203      | 33.887699      | 32.5410487     | 1.092E-41 | 1.60025  | up        | PREDICTED: protein TIC 40, chloroplastic-like [Sesamum indicum]                                                       |
| c42792.graph_c0 | 2.89511177    | 1.97912932    | 2.26849588    | 0.25660373     | 0.23168911     | 0.33501847     | 2.53E-22  | -4.20345 | down      | PREDICTED: external alternative NAD(P)H-ubiquinone oxidoreductase B1, mitochondrial-like isoform X2 [Sesamum indicum] |
| c42794.graph_c0 | 5.53287244    | 5.83162286    | 5.31155846    | 59.5382995     | 55.7224169     | 56.4965263     | 4.92E-109 | 2.27463  | up        | PREDICTED: LOW QUALITY PROTEIN: cytochrome P450 78A7-like [Sesamum indicum]                                           |
| c42797.graph_c0 | 68.4494852    | 70.999687     | 61.7742379    | 27.9946258     | 37.3394153     | 28.8321544     | 2.869E-97 | -2.18548 | down      | PREDICTED: LOW QUALITY PROTEIN: probable WRKY transcription factor 33 [Sesamum indicum]                               |
| c42799.graph_c0 | 38.4660335    | 44.0537368    | 36.9758597    | 18.7201538     | 18.3873938     | 18.0040579     | 3.861E-53 | -2.20629 | down      | PREDICTED: uncharacterized protein LOC105164926 [Sesamum indicum]                                                     |
| c42801.graph_c0 | 21.5200614    | 19.3198301    | 23.5618156    | 5.36551673     | 6.23776492     | 6.72471367     | 1.222E-39 | -2.90458 | down      | vacuolar H <sup>+</sup> -ATPase A subunit [Citrus unshiu]                                                             |
| c42803.graph_c0 | 30.9510395    | 31.7744116    | 29.6011088    | 192.11874      | 202.883994     | 188.784286     | 3.739E-87 | 1.57048  | up        | PREDICTED: 2,3-bisphosphoglycerate-independent phosphoglycerate mutase [Sesamum indicum]                              |
| c42810.graph_c0 | 0.80684377    | 0.56834749    | 0.7680194     | 8.77442215     | 9.60894915     | 8.84348652     | 1.71E-29  | 2.57611  | up        | hypothetical protein MIMGU_mgv1a004565mg [Erythranthe guttata]                                                        |
| c42811.graph_c1 | 2.18045566    | 1.69154526    | 2.17152818    | 20.2450868     | 25.469557      | 21.8216873     | 4.432E-29 | 2.39056  | up        | hypothetical protein MIMGU_mgv1a01610/mg [Erythranthe guttata]                                                        |
| c42812.graph_c0 | 0.68415176    | 0.59144999    | 0.31969531    | 2.37317923     | 2.28560889     | 2.26846542     | 0.0059796 | 1.03651  | up        | PREDICTED: protein TPX2-like isoform X2 [Sesamum indicum]                                                             |
| c42817.graph_c0 | 1.84452032    | 1.93777165    | 2.06519588    | 10.2335879     | 10.5942072     | 10.3975398     | 2.386E-21 | 1.32487  | up        | PREDICTED: probable glutamate carboxypeptidase 2 isoform X2 [Sesamum indicum]                                         |
| c42818.graph_c0 | 21.1990576    | 20.7275065    | 19.808499     | 98.8619841     | 94.3713506     | 96.4908354     | 4.324E-43 | 1.14084  | up        | V-type proton ATPase subunit B2 -like protein [Gossypium arboreum]                                                    |
| c42820.graph_c0 | 4.37690861    | 4.43107883    | 5.04926781    | 50.3374818     | 51.7493838     | 49.8504173     | 4.5E-127  | 2.36216  | up        | PREDICTED: glucosidase 2 subunit beta [Sesamum indicum]                                                               |
| c42822.graph_c0 | 16.7051912    | 17.6386214    | 17.1653496    | 8.65263937     | 8.47565393     | 9.00820253     | 1.315E-81 | -2.06925 | down      | PREDICTED: uncharacterized protein LOC105177905 [Sesamum indicum]                                                     |
| c42826.graph_c0 | 2.21721753    | 1.65104515    | 2.60598687    | 10.9264911     | 11.0899247     | 10.6157267     | 1.457E-14 | 1.23959  | up        | PREDICTED: B3 domain-containing protein Os01g0723500-like [Sesamum indicum]                                           |
| c42828.graph_c0 | 7.51600979    | 6.65001679    | 8.1029023     | 5.23754197     | 4.26719201     | 4.99165489     | 5.62E-20  | -1.71087 | down      | hypothetical protein ARALYDRAFT_319569 [Arabidopsis lyrata subsp. lyrata]                                             |
| c42831.graph_c0 | 35.1806492    | 32.2477965    | 31.8210362    | 19.9194302     | 20.2466972     | 22.0523358     | 1.07E-51  | -1.76273 | down      | PREDICTED: uncharacterized protein LOC105163175 [Sesamum indicum]                                                     |
| c42834.graph_c0 | 15.5343019    | 15.1394041    | 12.7271646    | 8.11521897     | 7.61706136     | 7.5759625      | 2.673E-52 | -1.98503 | down      | PREDICTED: calmodulin-binding transcription activator 1 [Sesamum indicum]                                             |
| c42838.graph_c0 | 0.80017006    | 0.84004308    | 0.62698183    | 10.7801178     | 12.2052161     | 9.95392077     | 1.4E-47   | 2.77271  | up        | PREDICTED: WD repeat-containing protein 44 [Sesamum indicum]                                                          |
| c42839.graph_c0 | 11.3705617    | 11.4394322    | 12.8405163    | 10.6848436     | 9.7604676      | 10.5578554     | 6.052E-17 | -1.29346 | down      | PREDICTED: probable complex I intermediate-associated protein 30-like [Citrus sinensis]                               |

| #ID             | 0 h-1<br>FPKM | 0 h-2<br>FPKM | 0 h-3<br>FPKM | 28 h-1<br>FPKM | 28 h-2<br>FPKM | 28 h-3<br>FPKM | FDR       | log2FC   | regulated | nr_annotation                                                                                    |
|-----------------|---------------|---------------|---------------|----------------|----------------|----------------|-----------|----------|-----------|--------------------------------------------------------------------------------------------------|
| c42843.graph_c0 | 0.03198604    | 0.16009036    | 0.28772332    | 0.76715996     | 0.9445548      | 0.83466169     | 0.0079531 | 1.29816  | up        | Receptor-like protein kinase [Medicago truncatula]                                               |
| c42847.graph_c0 | 71.487786     | 70.375624     | 70.0994816    | 66.9007609     | 65.3616884     | 67.4179918     | 4.674E-47 | -1.17634 | down      | PREDICTED: uncharacterized protein LOC105164616 [Sesamum indicum]                                |
| c42849.graph_c0 | 0.30173407    | 0.20135748    | 0.4523636     | 2.19298587     | 1.38604244     | 2.29647182     | 0.0009614 | 1.52427  | up        | PREDICTED: monothiol glutaredoxin-S10-like [Sesamum indicum]                                     |
| c42851.graph_c0 | 10.3016933    | 9.7616489     | 8.99892214    | 10.1371794     | 10.6530904     | 9.71342382     | 4.1E-18   | -1.01944 | down      | nypothetical protein MIMGU_mgv1a008129mg [Erythranthe cuttata]                                   |
| c42854.graph_c0 | 9.42569303    | 10.6269375    | 13.6423747    | 1.29799693     | 0.91153186     | 0.70610327     | 6.261E-22 | -4.62752 | down      | -                                                                                                |
| c42859.graph_c0 | 44.975602     | 45.2581446    | 45.2945422    | 34.0675726     | 31.9016396     | 34.1622674     | 1.066E-75 | -1.5271  | down      | PREDICTED: soluble starch synthase 1, chloroplastic/amyloplastic-like, partial [Sesamum indicum] |
| c42863.graph_c1 | 31.0968348    | 31.1681906    | 31.5451752    | 26.9518389     | 26.7869374     | 27.2582856     | 9.322E-45 | -1.30254 | down      | PREDICTED: uncharacterized protein LOC105166783 [Sesamum indicum]                                |
| c42865.graph_c0 | 11.4783505    | 11.0424521    | 10.9385955    | 9.67127666     | 9.8521179      | 8.84350406     | 4.36E-39  | -1.3287  | down      | PREDICTED: putative amidase C869.01 isoform X1 [Sesamum indicum]                                 |
| c42869.graph_c0 | 3.25445027    | 3.56552415    | 2.8978313     | 15.476987      | 16.8666558     | 16.2612896     | 3.205E-20 | 1.23356  | up        | PREDICTED: small RNA degrading nuclease 5 isoform X1 [Sesamum indicum]                           |
| c42872.graph_c0 | 6.77736797    | 5.08811586    | 6.41729507    | 5.99515866     | 6.3201205      | 5.6324114      | 3.784E-08 | -1.11774 | down      | PREDICTED: uncharacterized protein LOC105163723 [Sesamum indicum]                                |
| c42875.graph_c0 | 1.02767578    | 0.85725404    | 0.88040271    | 0.68466643     | 0.36529385     | 0.73644474     | 1.252E-05 | -1.71716 | down      | --                                                                                               |
| c42877.graph_c1 | 2.38608402    | 3.00172998    | 2.48611819    | 13.5923166     | 11.256925      | 11.9326222     | 1.772E-11 | 1.13345  | up        | PREDICTED: protein DEK-like [Sesamum indicum]                                                    |
| c42878.graph_c0 | 13.7380393    | 14.3018677    | 12.2871314    | 8.69336964     | 8.90708973     | 8.73407317     | 6.746E-72 | -1.70383 | down      | PREDICTED: long chain acyl-CoA synthetase 4 [Sesamum indicum]                                    |
| c42879.graph_c0 | 5.01540422    | 5.88882447    | 5.2953456     | 26.7180881     | 27.8421446     | 25.0655718     | 1.415E-27 | 1.20607  | up        | PREDICTED: uncharacterized protein LOC105179636 isoform X3 [Sesamum indicum]                     |
| c42880.graph_c0 | 6.87570357    | 6.64928046    | 6.28971449    | 32.9477839     | 31.7753462     | 28.6820717     | 9.177E-16 | 1.14694  | up        | PREDICTED: uncharacterized protein LOC105164000 [Sesamum indicum]                                |
| c42882.graph_c0 | 0.3361044     | 0.37849608    | 0.10797687    | 4.03059924     | 4.41121601     | 4.06133772     | 2.553E-12 | 2.84682  | up        | PREDICTED: transcription factor bHLH110 [Sesamum indicum]                                        |
| c42883.graph_c0 | 0.49300285    | 0.41757398    | 0.29239762    | 5.18173744     | 4.85282713     | 5.93755019     | 3.955E-15 | 2.64737  | up        | PREDICTED: uncharacterized protein LOC101301730 isoform 2 [Fragaria vesca subsp. vesca]          |
| c42883.graph_c1 | 1.48822958    | 1.42891493    | 1.24893645    | 18.6968626     | 19.6917778     | 19.6695207     | 1.858E-62 | 2.71244  | up        | PREDICTED: uncharacterized protein At1g01500-like [Sesamum indicum]                              |
| c42886.graph_c0 | 3.60303267    | 3.66928692    | 3.03307807    | 19.6172326     | 19.2086109     | 19.0244835     | 5.747E-54 | 1.40058  | up        | PREDICTED: LOW QUALITY PROTEIN: translational activator GCN1 [Sesamum indicum]                   |
| c42887.graph_c0 | 10.0495079    | 10.9984642    | 9.03981086    | 51.1761637     | 54.5166739     | 56.0234612     | 8.457E-28 | 1.33752  | up        | -                                                                                                |
| c42891.graph_c0 | 0.08844409    | 0             | 0             | 2.48551856     | 2.37961549     | 2.44778275     | 1.3E-18   | 5.31072  | up        | PREDICTED: uncharacterized protein LOC104093672 [Nicotiana tomentosiformis]                      |
| c42892.graph_c0 | 11.0482363    | 11.210108     | 10.7771332    | 8.13929163     | 10.7104511     | 8.87531596     | 1.832E-19 | -1.34354 | down      | PREDICTED: UDP-galactose/UDP-glucose transporter 5B-like [Sesamum indicum]                       |
| c42898.graph_c0 | 33.0156385    | 30.9476645    | 31.7104555    | 31.3756583     | 32.7219909     | 33.7438736     | 2.505E-26 | -1.05766 | down      | unknown [Medicago truncatula]                                                                    |

| #ID             | 0 h-1<br>FPKM | 0 h-2<br>FPKM | 0 h-3<br>FPKM | 28 h-1<br>FPKM | 28 h-2<br>FPKM | 28 h-3<br>FPKM | FDR       | log2FC   | regulated | nr_annotation                                                                                             |
|-----------------|---------------|---------------|---------------|----------------|----------------|----------------|-----------|----------|-----------|-----------------------------------------------------------------------------------------------------------|
| c42901.graph_c0 | 28.4815192    | 25.9411133    | 25.7039791    | 23.0408631     | 23.74268       | 23.7849546     | 6.109E-49 | -1.27264 | down      | PREDICTED: MACPF domain-containing protein At4g24290-like [Sesamum indicum]                               |
| c42911.graph_c1 | 49.251218     | 48.519865     | 47.5584319    | 6.75030329     | 7.45965027     | 7.66661888     | 0         | -3.82171 | down      | hypothetical protein MIMGU_mgv1a023461mg [Erythranthe ontifata]                                           |
| c42913.graph_c0 | 1.40381267    | 0.84313102    | 0.96210926    | 4.78399342     | 4.76987166     | 4.93975253     | 3.456E-05 | 1.0888   | up        | PREDICTED: uncharacterized protein LOC105176347 isoform X1 [Sesamum indicum]                              |
| c42916.graph_c0 | 40.1535778    | 39.1804968    | 38.6630692    | 29.673866      | 31.8486451     | 30.116956      | 3.083E-52 | -1.45499 | down      | hypothetical protein MIMGU_mgv1a013052mg [Erythranthe ontifata]                                           |
| c42919.graph_c0 | 18.8064427    | 18.8478197    | 16.6709048    | 12.4079736     | 11.7796566     | 12.6092559     | 5.496E-71 | -1.65075 | down      | PREDICTED: pentatricopeptide repeat-containing protein At4g02820, mitochondrial [Sesamum indicum]         |
| c42920.graph_c0 | 1.18665484    | 0.67006534    | 0.54739944    | 11.7647557     | 14.1566395     | 10.2134749     | 3.932E-19 | 2.82679  | up        | PREDICTED: uncharacterized protein LOC105169238 [Sesamum indicum]                                         |
| c42921.graph_c0 | 0.31391227    | 0.25138128    | 0.32271175    | 1.9620868      | 2.43077313     | 2.08508421     | 0.0001344 | 1.77488  | up        | PREDICTED: protein notum homolog isoform X1 [Sesamum indicum]                                             |
| c42925.graph_c0 | 11.7413575    | 12.8380176    | 13.7948428    | 4.20113279     | 4.92781091     | 4.91257548     | 1.015E-41 | -2.54267 | down      | PREDICTED: formin-like protein 5 [Sesamum indicum]                                                        |
| c42928.graph_c0 | 15.591991     | 15.8634664    | 15.4583538    | 2.39183079     | 2.77812486     | 2.54859792     | 0         | -3.6942  | down      | PREDICTED: probably inactive leucine-rich repeat receptor-like protein kinase At5g06940 [Sesamum indicum] |
| c42929.graph_c0 | 2.4391503     | 1.05432414    | 2.49327647    | 0.20145004     | 0.4365372      | 0.13150527     | 4.991E-06 | -4.0571  | down      | PREDICTED: mitochondrial phosphate carrier protein 3, mitochondrial-like [Sesamum indicum]                |
| c42932.graph_c0 | 18.6742762    | 21.0004891    | 22.1219796    | 10.0985709     | 8.97927939     | 10.2095069     | 1.631E-31 | -2.16928 | down      | PREDICTED: sulfate transporter 4.1, chloroplastic [Sesamum indicum]                                       |
| c42937.graph_c0 | 23.8166415    | 23.4105015    | 23.4599954    | 25.2015393     | 23.0051942     | 23.7062073     | 2.43E-34  | -1.06559 | down      | hypothetical protein MIMGU_mgv1a002056mg [Erythranthe ontifata]                                           |
| c42939.graph_c0 | 32.9914529    | 34.189712     | 30.9396865    | 25.5094198     | 23.6707976     | 25.2284994     | 1.114E-75 | -1.4885  | down      | PREDICTED: protein transport protein SEC16B homolog [Sesamum indicum]                                     |
| c42941.graph_c0 | 6.43423001    | 7.17105851    | 7.88466215    | 30.4204533     | 32.1461878     | 30.9597088     | 1.674E-21 | 1.02866  | up        | PREDICTED: wall-associated receptor kinase-like 20 [Sesamum indicum]                                      |
| c42942.graph_c1 | 14.6034759    | 14.7327509    | 13.0258428    | 6.70121281     | 6.57670312     | 7.3700949      | 3.731E-45 | -2.12527 | down      | PREDICTED: uncharacterized protein LOC105166066 [Sesamum indicum]                                         |
| c42944.graph_c0 | 32.155664     | 32.6903622    | 32.2542682    | 31.3161333     | 30.3252795     | 30.7140697     | 3.967E-42 | -1.16281 | down      | PREDICTED: uncharacterized protein LOC105162695 [Sesamum indicum]                                         |
| c42945.graph_c0 | 111.577083    | 104.961575    | 115.648847    | 68.3819418     | 75.7673936     | 73.7716664     | 8.337E-57 | -1.69939 | down      | PREDICTED: cell division cycle protein 48 homolog [Solanum lycopersicum]                                  |
| c42945.graph_c1 | 100.088888    | 104.116071    | 109.249175    | 63.8526738     | 68.2554348     | 69.032228      | 1.837E-55 | -1.73151 | down      | PREDICTED: cell division cycle protein 48 homolog [Sesamum indicum]                                       |
| c42947.graph_c0 | 2.72746655    | 2.1234871     | 2.53131848    | 13.9495676     | 13.0260384     | 13.239916      | 4.145E-11 | 1.35538  | up        | PREDICTED: 39S ribosomal protein L45, mitochondrial [Sesamum indicum]                                     |
| c42950.graph_c0 | 0.05386135    | 0.16174586    | 0             | 7.86837014     | 7.86432395     | 6.73995493     | 1.174E-53 | 5.62689  | up        | hypothetical protein CISIN_1g0086311mg, partial [Citrus sinensis]                                         |
| c42952.graph_c0 | 14.3514206    | 14.0426346    | 13.1998984    | 68.1717245     | 65.5778661     | 66.819225      | 1.996E-41 | 1.18018  | up        | hypothetical protein MIMGU_mgv1a007743mg [Erythranthe ontifata]                                           |
| c42953.graph_c0 | 0.78871099    | 0.48056568    | 0.44066298    | 10.8415353     | 11.1615848     | 10.6769362     | 2.664E-38 | 3.17227  | up        | hypothetical protein CICLE_v10018965mg [Citrus clementina]                                                |
| c42956.graph_c1 | 3.89591947    | 4.73637522    | 3.77454944    | 21.3660066     | 20.4044719     | 19.7449938     | 4.428E-38 | 1.22003  | up        | PREDICTED: protein NAP1 isoform X2 [Sesamum indicum]                                                      |

| #ID             | 0 h-1<br>FPKM | 0 h-2<br>FPKM | 0 h-3<br>FPKM | 28 h-1<br>FPKM | 28 h-2<br>FPKM | 28 h-3<br>FPKM | FDR       | log2FC   | regulated | nr_annotation                                                                        |
|-----------------|---------------|---------------|---------------|----------------|----------------|----------------|-----------|----------|-----------|--------------------------------------------------------------------------------------|
| c42957.graph_c0 | 0.1154822     | 0.23119568    | 0.2967984     | 1.51077235     | 1.46512918     | 1.34692401     | 0.000209  | 1.64733  | up        | PREDICTED: putative pectate lyase 2 [Sesamum indicum]                                |
| c42958.graph_c0 | 1.40473928    | 1.32802669    | 1.50428799    | 8.13929138     | 10.0120754     | 9.76569065     | 3.689E-13 | 1.62853  | up        | hypothetical protein MIMGU_mgv1a008941mg [Erythranthe<br>cuffata]                    |
| c42960.graph_c0 | 0.39332024    | 0.31497127    | 0.40434566    | 8.46154127     | 7.38187104     | 7.13781035     | 1.271E-14 | 3.27647  | up        | PREDICTED: SEC14 cytosolic factor [Sesamum indicum]                                  |
| c42963.graph_c0 | 20.3407552    | 20.31743      | 19.8283732    | 20.2084063     | 20.1940954     | 20.1787641     | 6.411E-35 | -1.08796 | down      | PREDICTED: ubiquitin carboxyl-terminal hydrolase 25 isoform X1<br>[Sesamum indicum]  |
| c42964.graph_c0 | 0.77642246    | 0.24543156    | 0.57763524    | 3.14819647     | 3.4593008      | 3.36865531     | 1.677E-05 | 1.55239  | up        | PREDICTED: uncharacterized protein LOC105168903 [Sesamum<br>indicum]                 |
| c42966.graph_c0 | 2.16349917    | 4.84089956    | 3.10726234    | 18.0365678     | 13.5293508     | 12.6798577     | 0.0070903 | 1.03683  | up        | NAD(P)H-quinone oxidoreductase subunit H [Medicago truncatula]                       |
| c42978.graph_c0 | 24.9943599    | 26.39646      | 23.8953906    | 24.3558197     | 20.25649       | 22.6609312     | 7.274E-53 | -1.25191 | down      | PREDICTED: uncharacterized protein LOC105176008 [Sesamum<br>indicum]                 |
| c42979.graph_c0 | 103.278708    | 97.5754529    | 92.6361014    | 63.1557789     | 63.9484689     | 62.408556      | 3.07E-100 | -1.72038 | down      | PREDICTED: heterogeneous nuclear ribonucleoprotein A2<br>homolog 1 [Sesamum indicum] |
| c42981.graph_c0 | 1.03973855    | 0.59473125    | 0.71577064    | 12.3876885     | 12.2814821     | 11.9581289     | 1.03E-35  | 2.87521  | up        | PREDICTED: petal death protein [Sesamum indicum]                                     |
| c42985.graph_c1 | 2.03857477    | 1.90636504    | 1.65451534    | 35.8514114     | 35.3276343     | 34.6472058     | 3.62E-138 | 3.15215  | up        | PREDICTED: protein NSP-INTERACTING KINASE 3 [Sesamum<br>indicum]                     |
| c42986.graph_c0 | 72.7450531    | 62.785977     | 70.1657158    | 40.6262867     | 41.1606405     | 43.8593737     | 1.172E-47 | -1.8013  | down      | thioredoxin peroxidase, partial [Fargesia spathacea]                                 |
| c42986.graph_c1 | 0.1851051     | 0.92645228    | 0.23786738    | 8.15271923     | 12.1713917     | 8.78224728     | 1.356E-12 | 3.34261  | up        | PREDICTED: cytochrome P450 CYP82D4-like [Sesamum<br>indicum]                         |
| c42996.graph_c0 | 0.12918691    | 0.25863253    | 0.16601029    | 5.30491484     | 5.84954        | 5.55461277     | 1.885E-15 | 3.82379  | up        | -                                                                                    |
| c42998.graph_c0 | 3.10135118    | 3.79433598    | 2.9386991     | 29.2115016     | 31.8024219     | 30.5618008     | 3.218E-65 | 2.12973  | up        | PREDICTED: exocyst complex component EXO70B1 [Sesamum<br>indicum]                    |
| c42999.graph_c0 | 2.75567881    | 3.01589244    | 2.54963259    | 13.3787807     | 10.9224399     | 11.5924773     | 1.527E-08 | 1.01955  | up        | PREDICTED: uncharacterized protein LOC105170455 [Sesamum<br>indicum]                 |
| c43005.graph_c0 | 0.66823858    | 0.55086518    | 0.50512531    | 3.37113469     | 3.52102739     | 3.18209075     | 3.127E-08 | 1.45888  | up        | PREDICTED: myosin heavy chain, striated muscle [Sesamum<br>indicum]                  |
| c43008.graph_c0 | 6.22339052    | 5.33592121    | 6.20887676    | 36.3376742     | 36.6866874     | 35.4133047     | 8.867E-51 | 1.51838  | up        | PREDICTED: uncharacterized protein LOC105169979 [Sesamum<br>indicum]                 |
| c43010.graph_c0 | 8.68574599    | 9.40816642    | 7.37160584    | 115.702346     | 110.699891     | 97.0069662     | 3.619E-70 | 2.57784  | up        | hypothetical protein MIMGU_mgv1a004602mg [Erythranthe<br>cuffata]                    |
| c43011.graph_c0 | 11.4300259    | 12.139122     | 9.7323164     | 6.75388369     | 6.06763312     | 5.31822495     | 5.625E-39 | -1.96551 | down      | PREDICTED: uncharacterized protein LOC105158337 [Sesamum<br>indicum]                 |
| c43012.graph_c0 | 0.67954997    | 0.71511405    | 0.49260178    | 7.71232917     | 7.43231788     | 7.80191166     | 2.082E-39 | 2.51769  | up        | PREDICTED: heat shock 70 kDa protein 16 [Sesamum indicum]                            |
| c43013.graph_c0 | 13.1658265    | 11.1298347    | 14.8037823    | 58.2299337     | 54.4727058     | 57.3943024     | 1.485E-19 | 1.02859  | up        | PREDICTED: uncharacterized protein LOC105176983 [Sesamum<br>indicum]                 |
| c43015.graph_c0 | 3.93982718    | 3.38437199    | 3.91382196    | 18.0132947     | 16.3926704     | 16.3889692     | 1.669E-16 | 1.08526  | up        | PREDICTED: protein PHLOEM PROTEIN 2-LIKE A9 [Sesamum<br>indicum]                     |
| c43016.graph_c0 | 2.16973319    | 1.97836968    | 1.98762277    | 11.2572341     | 11.4611879     | 12.2180206     | 2.893E-22 | 1.42013  | up        | PREDICTED: protein STRUBBELIG-RECEPTOR FAMILY 1<br>[Sesamum indicum]                 |

| #ID             | 0 h-1<br>FPKM | 0 h-2<br>FPKM | 0 h-3<br>FPKM | 28 h-1<br>FPKM | 28 h-2<br>FPKM | 28 h-3<br>FPKM | FDR       | log2FC   | regulated | nr_annotation                                                                                                                                |
|-----------------|---------------|---------------|---------------|----------------|----------------|----------------|-----------|----------|-----------|----------------------------------------------------------------------------------------------------------------------------------------------|
| c43017.graph_c0 | 1.24395948    | 0.96849287    | 0.8436724     | 11.3012822     | 10.974967      | 11.721874      | 2.682E-28 | 2.38987  | up        | hypothetical protein MIMGU_mgv1a007209/mg [Erythranthe guttata]                                                                              |
| c43022.graph_c1 | 16.1807069    | 13.1064646    | 14.0052983    | 69.2355723     | 72.3259279     | 75.9084622     | 1.684E-39 | 1.23977  | up        | PREDICTED: eukaryotic translation initiation factor 3 subunit M [Sesamum indicum]                                                            |
| c43024.graph_c0 | 2.52998112    | 2.85193076    | 2.31386438    | 14.8592955     | 14.2092788     | 14.7609472     | 1.969E-25 | 1.42083  | up        | PREDICTED: uncharacterized protein LOC105166682 isoform X3 [Sesamum indicum]                                                                 |
| c43027.graph_c0 | 0             | 0.22369319    | 0.04102386    | 4.68686991     | 5.00693653     | 3.50258813     | 3.725E-21 | 4.54872  | up        | PREDICTED: phototropin-2 isoform X1 [Sesamum indicum]                                                                                        |
| c43030.graph_c0 | 6.81193458    | 6.97372742    | 6.56520422    | 77.076119      | 75.688203      | 80.9810987     | 1.025E-43 | 2.43208  | up        | Succinyl-CoA ligase [ADP-forming] subunit alpha-1 [Morus notabilis]                                                                          |
| c43030.graph_c1 | 5.46072553    | 6.41901636    | 4.18459773    | 57.6025626     | 59.7355556     | 53.3020088     | 8.437E-82 | 2.32171  | up        | hypothetical protein M569_06331, partial [Genlisea aurea]                                                                                    |
| c43031.graph_c0 | 2.40877652    | 2.15051951    | 2.09146838    | 14.0527949     | 14.0127301     | 14.7873668     | 1.142E-11 | 1.59908  | up        | PREDICTED: serine protease SPPA, chloroplastic-like [Sesamum indicum]                                                                        |
| c43032.graph_c0 | 0             | 0             | 0.03968561    | 0.98759907     | 0.79037875     | 1.04397155     | 1.808E-12 | 5.02274  | up        | Protein kinase G11A [Glycine soja]                                                                                                           |
| c43034.graph_c0 | 5.44012392    | 5.27697784    | 6.06011423    | 5.23915822     | 4.86309862     | 4.83447055     | 2.211E-19 | -1.2599  | down      | hypothetical protein MIMGU_mgv1a00458/mg [Erythranthe guttata]                                                                               |
| c43040.graph_c0 | 11.0554949    | 12.5801538    | 11.8177214    | 6.05332627     | 5.31918644     | 5.20407899     | 3.065E-67 | -2.18811 | down      | PREDICTED: mitogen-activated protein kinase kinase kinase YODA-like isoform X5 [Sesamum indicum]                                             |
| c43041.graph_c0 | 5.45498038    | 4.247011      | 4.15399452    | 22.7233083     | 21.8428338     | 22.0767029     | 1.099E-13 | 1.17839  | up        | PREDICTED: uncharacterized protein LOC105157371 [Sesamum indicum]                                                                            |
| c43042.graph_c0 | 0.40868792    | 0.88113234    | 0.82816871    | 8.19122928     | 8.2726938      | 7.8026333      | 3.064E-45 | 2.42142  | up        | hypothetical protein MIMGU_mgv1a000114/mg [Erythranthe guttata]                                                                              |
| c43044.graph_c1 | 61.4178725    | 66.468645     | 55.7393634    | 7.23012382     | 7.5958709      | 8.57475123     | 3.46E-166 | -4.06053 | down      | PREDICTED: uncharacterized protein LOC100243914 [Vitis vinifera]                                                                             |
| c43045.graph_c0 | 19.9331374    | 18.370342     | 20.5518534    | 12.3019506     | 11.7368767     | 12.467158      | 7.967E-54 | -1.78003 | down      | PREDICTED: putative MO25-like protein At5g47540 [Sesamum indicum]                                                                            |
| c43047.graph_c0 | 16.9779486    | 17.8855145    | 16.767909     | 85.8734076     | 93.2179113     | 89.9020381     | 3.727E-56 | 1.29096  | up        | PREDICTED: putative serine/threonine-protein kinase {ECO:0000250 UniProtKB:Q9FE20, ECO:0000303 Ref.2} isoform X1 [Nicotiana tomentosiformis] |
| c43050.graph_c0 | 11.7228524    | 13.0100901    | 11.2436662    | 8.52010157     | 8.08307006     | 8.4385205      | 3.16E-33  | -1.6123  | down      | PREDICTED: putative vesicle-associated membrane protein 726 [Pyrus x bretschneideri]                                                         |
| c43052.graph_c0 | 56.9464359    | 55.611655     | 55.3110811    | 56.6783019     | 54.6662134     | 52.523125      | 3.136E-37 | -1.12528 | down      | PLAC8 family protein isoform 1 [Theobroma cacao]                                                                                             |
| c43053.graph_c0 | 19.8850525    | 21.5596558    | 20.7423533    | 10.9187617     | 9.47575916     | 11.1298171     | 1.484E-68 | -2.07046 | down      | PREDICTED: F-box protein PP2-A15 [Sesamum indicum]                                                                                           |
| c43056.graph_c0 | 0.06354077    | 0             | 0             | 2.0088762      | 1.68873535     | 1.78996005     | 5.22E-15  | 5.37346  | up        | PREDICTED: flap endonuclease GEN-like 2 isoform X2 [Sesamum indicum]                                                                         |
| c43058.graph_c0 | 0.48554697    | 0.22872149    | 0.33032492    | 2.3456988      | 2.43657514     | 1.86325502     | 2.434E-05 | 1.58151  | up        | unnamed protein product [Coffea canephora]                                                                                                   |
| c43062.graph_c0 | 10.9373974    | 10.8846964    | 11.6035372    | 9.84411379     | 8.12327712     | 8.46012235     | 1.533E-42 | -1.43039 | down      | PREDICTED: chloride channel protein CLC-f isoform X1 [Sesamum indicum]                                                                       |
| c43063.graph_c0 | 2.19149854    | 2.48342603    | 1.85972988    | 20.4655727     | 20.8663162     | 22.2908426     | 1.428E-38 | 2.1956   | up        | PREDICTED: uncharacterized protein LOC105177601 [Sesamum indicum]                                                                            |
| c43066.graph_c0 | 0.73629421    | 1.0318441     | 1.19847847    | 4.70918262     | 3.63992721     | 4.48309698     | 0.0014789 | 1.01754  | up        | PREDICTED: transcription factor TCP5-like [Sesamum indicum]                                                                                  |



| #ID             | 0 h-1<br>FPKM | 0 h-2<br>FPKM | 0 h-3<br>FPKM | 28 h-1<br>FPKM | 28 h-2<br>FPKM | 28 h-3<br>FPKM | FDR       | log2FC   | regulated | nr_annotation                                                                                        |
|-----------------|---------------|---------------|---------------|----------------|----------------|----------------|-----------|----------|-----------|------------------------------------------------------------------------------------------------------|
| c43066.graph_c1 | 1.61440524    | 2.50098616    | 1.87699612    | 25.6179326     | 25.0476304     | 23.662352      | 2.43E-58  | 2.5414   | up        | PREDICTED: zinc finger CCCH domain-containing protein 67 isoform X1 [Sesamum indicum]                |
| c43072.graph_c0 | 6.42113669    | 8.38467807    | 6.82328537    | 31.6358252     | 32.0486093     | 29.6959154     | 1.08E-22  | 1.01931  | up        | PREDICTED: phosphatidylinositol 4-phosphate 5-kinase 9-like [Sesamum indicum]                        |
| c43077.graph_c0 | 1.35488899    | 0.96874693    | 0.64668908    | 6.61172842     | 5.84275445     | 6.19864437     | 2.423E-08 | 1.56872  | up        | PREDICTED: microtubule-associated protein TORTIFOLIA1-like [Sesamum indicum]                         |
| c43079.graph_c0 | 0.39530079    | 0.49462079    | 0.38098288    | 4.22334438     | 4.61744594     | 4.71217089     | 1.028E-19 | 2.32551  | up        | PREDICTED: AIF-dependent DNA nuclease DDM1 [Sesamum indicum]                                         |
| c43082.graph_c1 | 0             | 0             | 0.14227133    | 8.12706519     | 7.0473649      | 9.91459845     | 1.434E-19 | 6.33355  | up        | PREDICTED: auxin-responsive protein IAA28-like [Sesamum indicum]                                     |
| c43088.graph_c0 | 1.5536107     | 1.43553822    | 1.68930491    | 0.1737162      | 0.1960618      | 0              | 2.294E-22 | -4.76063 | down      | PREDICTED: putative clathrin assembly protein At5g57200 [Sesamum indicum]                            |
| c43090.graph_c0 | 0.19142737    | 0.22994287    | 0.04919835    | 2.17040163     | 2.0099171      | 2.2932568      | 2.438E-08 | 2.70498  | up        | hypothetical protein MIMGU_mgv1a018481mg, partial [Erythranthe guttata]                              |
| c43092.graph_c0 | 1.5705004     | 2.37935376    | 1.36361837    | 12.0929949     | 14.6791555     | 13.8702795     | 3.859E-18 | 1.84762  | up        | PREDICTED: uncharacterized protein LOC105160850 [Sesamum indicum]                                    |
| c43096.graph_c0 | 0             | 0.08865349    | 0.11380928    | 9.33341686     | 10.4322928     | 8.69273563     | 2.775E-44 | 6.02522  | up        | PREDICTED: uncharacterized protein LOC104227860 [Nicotiana sylvestris]                               |
| c43097.graph_c0 | 30.9847032    | 34.7956099    | 31.574075     | 34.2867903     | 32.417388      | 33.5610181     | 8.072E-28 | -1.04786 | down      | PREDICTED: uncharacterized protein LOC105164803 [Sesamum indicum]                                    |
| c43099.graph_c0 | 5.5004032     | 5.26800128    | 6.37013851    | 0.03701538     | 0.07798331     | 0.0604085      | 5.9E-106  | -7.7035  | down      | PREDICTED: putative RING-H2 finger protein ATL21A [Sesamum indicum]                                  |
| c43100.graph_c0 | 16.5962635    | 16.263505     | 14.0609238    | 12.1508536     | 11.3604519     | 11.1259103     | 3.792E-57 | -1.52654 | down      | PREDICTED: kinesin-like protein NACK1 isoform X1 [Sesamum indicum]                                   |
| c43104.graph_c0 | 1.4032262     | 1.66001883    | 0.88520788    | 6.84231143     | 5.99379869     | 7.1871365      | 5.793E-08 | 1.25829  | up        | hypothetical protein MIMGU_mgv1a00/414mg [Erythranthe guttata]                                       |
| c43106.graph_c0 | 14.5307122    | 15.6461654    | 13.9187515    | 14.9934832     | 13.3846175     | 14.5470695     | 7.581E-26 | -1.12836 | down      | PREDICTED: uncharacterized protein LOC105166690 [Sesamum indicum]                                    |
| c43106.graph_c1 | 46.3082371    | 48.2622048    | 46.7387293    | 22.6553563     | 27.3694979     | 24.4442714     | 1.06E-126 | -2.01497 | down      | PREDICTED: bifunctional riboflavin biosynthesis protein RIBA 1, chloroplastic-like [Sesamum indicum] |
| c43107.graph_c0 | 5.90546584    | 6.1268983     | 6.8773114     | 5.07446504     | 5.26802188     | 4.70619508     | 1.557E-19 | -1.42248 | down      | PREDICTED: secretory carrier-associated membrane protein 2 [Sesamum indicum]                         |
| c43108.graph_c0 | 26.367832     | 27.9986795    | 23.2660393    | 22.5767534     | 20.5920939     | 20.3905421     | 2.89E-35  | -1.3775  | down      | PREDICTED: U-box domain-containing protein 32 isoform X3 [Sesamum indicum]                           |
| c43115.graph_c0 | 0             | 0.06908632    | 0             | 2.58330753     | 2.4457119      | 2.35354517     | 1.669E-17 | 5.65765  | up        | PREDICTED: MLO-like protein 4 [Sesamum indicum]                                                      |
| c43116.graph_c0 | 1.82084575    | 1.57249879    | 2.20222012    | 11.962319      | 11.902024      | 12.9795831     | 1.929E-18 | 1.62581  | up        | PREDICTED: tRNA (adenine(58)-N(1))-methyltransferase non-catalytic subunit trm6 [Sesamum indicum]    |
| c43117.graph_c0 | 8.8346542     | 8.37094729    | 8.44966291    | 38.9424827     | 36.6882435     | 38.7560336     | 6.444E-25 | 1.06666  | up        | PREDICTED: transcription factor BIM2 isoform X2 [Sesamum indicum]                                    |
| c43123.graph_c0 | 14.8565587    | 14.3694459    | 13.6941571    | 62.3713006     | 62.0333662     | 61.0808016     | 4.893E-21 | 1.02193  | up        | PREDICTED: GDSL esterase/lipase At4g01130-like [Sesamum indicum]                                     |

| #ID             | 0 h-1<br>FPKM | 0 h-2<br>FPKM | 0 h-3<br>FPKM | 28 h-1<br>FPKM | 28 h-2<br>FPKM | 28 h-3<br>FPKM | FDR       | log2FC   | regulated | nr_annotation                                                                                          |
|-----------------|---------------|---------------|---------------|----------------|----------------|----------------|-----------|----------|-----------|--------------------------------------------------------------------------------------------------------|
| c43124.graph_c0 | 157.487903    | 165.811311    | 167.884458    | 119.030324     | 116.919079     | 115.562076     | 4.719E-75 | -1.57402 | down      | PREDICTED: putative DNA-binding protein ESCAROLA [Sesamum indicum]                                     |
| c43128.graph_c0 | 8.88543989    | 7.97590031    | 9.21518529    | 5.10664395     | 5.02278405     | 4.76839952     | 9.088E-42 | -1.89929 | down      | PREDICTED: transmembrane protein 53-B [Sesamum indicum]                                                |
| c43139.graph_c0 | 76.7318865    | 76.2418678    | 74.1527519    | 27.3696788     | 29.6175433     | 31.0317194     | 3.54E-170 | -2.45738 | down      | PREDICTED: transcription factor bHLH112 isoform X1 [Sesamum indicum]                                   |
| c43140.graph_c0 | 0.67926502    | 0.60439573    | 0.43644122    | 23.0386752     | 24.8382964     | 24.5958435     | 2.8E-101  | 4.31168  | up        | PREDICTED: uncharacterized protein LOC102583254 [Solanum tuberosum]                                    |
| c43142.graph_c0 | 1.80162025    | 1.3917731     | 1.81185914    | 0.83972854     | 0.73249457     | 0.85941798     | 1.027E-16 | -2.13232 | down      | PREDICTED: protein WEAK CHLOROPLAST MOVEMENT UNDER BLUE LIGHT 1 isoform X1 [Sesamum indicum]           |
| c43143.graph_c0 | 12.2106154    | 11.1086055    | 13.263768     | 3.9224773      | 3.54162923     | 4.08090454     | 6.688E-45 | -2.75535 | down      | PREDICTED: vacuolar amino acid transporter 1-like isoform X1 [Eucalyptus grandis]                      |
| c43146.graph_c0 | 81.3470457    | 80.5463857    | 78.0199031    | 83.1514581     | 83.1142048     | 83.0970916     | 6.843E-38 | -1.03429 | down      | PREDICTED: hypothetical protein MIMGU_mgv1a000959mg [Erythranthe outtata]                              |
| c43147.graph_c0 | 1.19707318    | 2.99567966    | 3.84571607    | 37.846126      | 38.2956504     | 44.1933926     | 2.432E-16 | 2.80296  | up        | hypothetical protein [Asterochloris sp. DA2]                                                           |
| c43150.graph_c0 | 42.3389847    | 41.5084378    | 46.338634     | 36.5394487     | 39.9877672     | 39.9915669     | 8.86E-24  | -1.25172 | down      | PREDICTED: patellin-3 [Sesamum indicum]                                                                |
| c43151.graph_c0 | 7.89256139    | 6.96094989    | 6.46911328    | 2.32551411     | 2.49166916     | 2.17591526     | 5.133E-45 | -2.69718 | down      | PREDICTED: F-box protein At1g61340-like [Sesamum indicum]                                              |
| c43153.graph_c0 | 0.28949557    | 0.28978546    | 0.12400442    | 2.38457541     | 2.31136037     | 2.80423261     | 6.982E-07 | 2.33458  | up        | PREDICTED: uncharacterized protein LOC105157169 [Sesamum indicum]                                      |
| c43157.graph_c0 | 36.5862507    | 32.6939943    | 33.8650527    | 34.1297951     | 31.5059155     | 31.7568961     | 2.501E-29 | -1.1727  | down      | hypothetical protein MIMGU_mgv1a012602mg [Erythranthe outtata]                                         |
| c43159.graph_c1 | 0.5095856     | 0.53328205    | 0.68460302    | 5.97632621     | 7.08328169     | 7.14323763     | 4.624E-27 | 2.45362  | up        | PREDICTED: endonuclease 4-like [Sesamum indicum]                                                       |
| c43163.graph_c0 | 0.99496473    | 0.89433236    | 1.04372985    | 17.960303      | 18.748211      | 18.2440614     | 1.59E-102 | 3.13614  | up        | hypothetical protein SELMODRAF1_9153 [Selaginella moellendorffii]                                      |
| c43164.graph_c0 | 59.0424375    | 54.8653309    | 56.4947116    | 52.1987873     | 52.7388299     | 53.7295733     | 5.021E-46 | -1.193   | down      | PREDICTED: F-box protein SKP2A-like [Sesamum indicum]                                                  |
| c43165.graph_c0 | 3.44385889    | 2.99680699    | 3.09281754    | 17.7910453     | 17.065216      | 16.8846849     | 1.659E-30 | 1.35063  | up        | PREDICTED: uncharacterized protein LOC105161979 [Sesamum indicum]                                      |
| c43166.graph_c1 | 14.8243822    | 14.4805746    | 14.8485767    | 14.0293437     | 13.7546199     | 12.2712237     | 6.695E-24 | -1.23175 | down      | PREDICTED: syntaxin-81 [Sesamum indicum]                                                               |
| c43168.graph_c0 | 1.51507641    | 2.21655977    | 2.54598953    | 9.9103392      | 9.59818327     | 8.4669025      | 1.705E-05 | 1.05909  | up        | PREDICTED: annexin D5 [Sesamum indicum]                                                                |
| c43170.graph_c0 | 40.7768342    | 46.7402294    | 36.9881269    | 2.55686313     | 2.20367097     | 3.03473372     | 2.087E-97 | -5.08503 | down      | PREDICTED: hyoscyamine 6-dioxygenase [Sesamum indicum]                                                 |
| c43170.graph_c1 | 36.9351945    | 38.3454319    | 29.1559579    | 1.34221432     | 2.49303845     | 2.31564167     | 1.507E-82 | -5.1727  | down      | hypothetical protein MIMGU_mgv1a019548mg [Erythranthe outtata]                                         |
| c43172.graph_c0 | 102.133094    | 104.588501    | 106.484902    | 23.1262416     | 19.8340317     | 22.0076631     | 0         | -3.3601  | down      | PREDICTED: RING-H2 finger protein ATL47 [Sesamum indicum]                                              |
| c43177.graph_c0 | 1.50481999    | 1.25527237    | 0.87479314    | 15.8325298     | 17.2813127     | 17.5089362     | 3.829E-46 | 2.71582  | up        | PREDICTED: formin-like protein 1 [Sesamum indicum]                                                     |
| c43181.graph_c1 | 3.18198331    | 2.81429368    | 3.24877429    | 1.75824542     | 1.7019474      | 1.82247442     | 3.314E-22 | -1.89833 | down      | PREDICTED: nodulation-signaling pathway 2 protein-like [Sesamum indicum]                               |
| c43182.graph_c0 | 0.29576804    | 0.70315248    | 0.28505523    | 3.60062194     | 3.95460385     | 3.17926362     | 6.453E-08 | 1.97527  | up        | PREDICTED: rho GTPase-activating protein 5-like [Sesamum indicum]                                      |
| c43183.graph_c1 | 18.9229477    | 20.0018218    | 19.400718     | 8.44052415     | 9.25727588     | 10.270327      | 2.582E-89 | -2.1504  | down      | PREDICTED: pentatricopeptide repeat-containing protein At5g42310, mitochondrial-like [Sesamum indicum] |

| #ID             | 0 h-1<br>FPKM | 0 h-2<br>FPKM | 0 h-3<br>FPKM | 28 h-1<br>FPKM | 28 h-2<br>FPKM | 28 h-3<br>FPKM | FDR       | log2FC   | regulated | nr_annotation                                                                                               |
|-----------------|---------------|---------------|---------------|----------------|----------------|----------------|-----------|----------|-----------|-------------------------------------------------------------------------------------------------------------|
| c43183.graph_c2 | 3.6544276     | 2.48749913    | 3.6159848     | 21.3278159     | 21.6071896     | 20.979349      | 2.211E-29 | 1.61992  | up        | PREDICTED: O-glucosyltransferase rumi homolog [Beta vulgaris subsp. vulgaris]                               |
| c43188.graph_c0 | 3.17222643    | 2.49915971    | 2.4156661     | 11.1221724     | 12.2010797     | 11.2878886     | 7.503E-10 | 1.00978  | up        | PREDICTED: probable monogalactosyldiacylglycerol synthase, chloroplastic [Sesamum indicum]                  |
| c43190.graph_c0 | 3.33855733    | 3.52377252    | 3.47300152    | 17.2657188     | 17.7056581     | 17.806159      | 3.695E-25 | 1.26149  | up        | PREDICTED: LETM1 and EF-hand domain-containing protein 1, mitochondrial-like [Sesamum indicum]              |
| c43191.graph_c0 | 1.5130821     | 1.80309193    | 1.6666032     | 11.4159266     | 9.55099675     | 10.3265972     | 8.09E-21  | 1.55966  | up        | hypothetical protein MIMGU_mgv1a002186mg [Erythranthe outtata]                                              |
| c43192.graph_c0 | 1.89631175    | 2.24333982    | 2.52544788    | 11.6522951     | 11.3807049     | 10.9804116     | 2.788E-12 | 1.25732  | up        | PREDICTED: heparan-alpha-glucosaminide N-acetyltransferase-like [Sesamum indicum]                           |
| c43193.graph_c0 | 3.62297285    | 3.98331553    | 2.97657177    | 2.89215471     | 2.68929512     | 2.91180949     | 7.988E-15 | -1.40486 | down      | PREDICTED: rho GTPase-activating protein 1-like [Sesamum indicum]                                           |
| c43196.graph_c0 | 0.71781438    | 0.42458778    | 0.3773536     | 8.34725372     | 7.00150428     | 7.39179861     | 7.757E-25 | 2.8201   | up        | PREDICTED: basic leucine zipper 43-like [Sesamum indicum]                                                   |
| c43198.graph_c0 | 18.0700348    | 16.1288185    | 19.0650414    | 9.48394142     | 10.6108101     | 9.53893529     | 4.694E-32 | -1.93789 | down      | hypothetical protein MIMGU_mgv1a005420mg [Erythranthe outtata]                                              |
| c43199.graph_c1 | 3.12593216    | 4.14499163    | 3.3387608     | 21.2733342     | 22.1382852     | 22.1500106     | 9.552E-25 | 1.53703  | up        | PREDICTED: single-stranded DNA-binding protein, mitochondrial [Sesamum indicum]                             |
| c43200.graph_c0 | 3.30326925    | 3.26472157    | 2.79406648    | 20.0572918     | 19.9757177     | 20.4582329     | 1.599E-23 | 1.60354  | up        | PREDICTED: uncharacterized aarF domain-containing protein kinase At1g79600, chloroplastic [Sesamum indicum] |
| c43201.graph_c0 | 1.6494096     | 1.81616735    | 1.37771181    | 16.5431831     | 19.0500147     | 18.5857206     | 3.331E-37 | 2.39577  | up        | PREDICTED: ATP-dependent RNA helicase-like protein DB10 [Sesamum indicum]                                   |
| c43201.graph_c1 | 0.5038334     | 0.60520549    | 0.77693504    | 7.83632067     | 7.50528068     | 7.55970346     | 1.166E-15 | 2.50614  | up        | PREDICTED: ATP-dependent RNA helicase-like protein DB10 [Sesamum indicum]                                   |
| c43202.graph_c0 | 20.1522391    | 25.2777837    | 23.8982442    | 21.9697969     | 23.4284911     | 24.0873357     | 1.562E-09 | -1.08856 | down      | PREDICTED: probable phyto kinase 1, chloroplastic [Nicotiana sylvestris]                                    |
| c43205.graph_c0 | 28.2188275    | 26.440737     | 26.9530797    | 12.4880424     | 11.9963416     | 12.0358434     | 3.48E-134 | -2.25026 | down      | PREDICTED: protein TRANSPARENT TESTA 12-like [Sesamum indicum]                                              |
| c43206.graph_c0 | 0.12642643    | 0.21092172    | 0.16246297    | 1.65394806     | 1.88052744     | 2.02441216     | 7.267E-07 | 2.38395  | up        | hypothetical protein MIMGU_mgv1a010976mg [Erythranthe outtata]                                              |
| c43207.graph_c1 | 8.04206005    | 8.29405577    | 7.08530366    | 4.23978308     | 4.45781845     | 4.73327746     | 1.082E-68 | -1.89072 | down      | PREDICTED: BRCT domain-containing protein At4g02110 [Sesamum indicum]                                       |
| c43211.graph_c0 | 2.81169693    | 5.62902484    | 4.30135937    | 1.04609024     | 0.54914035     | 0.81389872     | 1.522E-07 | -3.49564 | down      | -                                                                                                           |
| c43214.graph_c0 | 0.42180977    | 0.14074405    | 0.54204225    | 8.94159314     | 9.27289983     | 8.54705561     | 2.012E-19 | 3.50107  | up        | -                                                                                                           |
| c43218.graph_c0 | 6.65294303    | 6.16169055    | 5.75279676    | 43.2467463     | 45.6169201     | 45.4663814     | 4.389E-39 | 1.76616  | up        | -                                                                                                           |
| c43222.graph_c0 | 40.6669995    | 40.9720572    | 41.3997528    | 13.4347913     | 14.0798785     | 12.6853868     | 3.37E-138 | -2.70504 | down      | --                                                                                                          |
| c43223.graph_c0 | 1.64077962    | 2.02144322    | 1.73002402    | 0.09173147     | 0.33129968     | 0.57386636     | 2.869E-20 | -3.52138 | down      | PREDICTED: uncharacterized protein LOC105164927 [Sesamum indicum]                                           |
| c43228.graph_c0 | 15.5547174    | 14.6958745    | 13.108353     | 69.5712922     | 64.4990999     | 61.9836532     | 1.823E-35 | 1.08809  | up        | PREDICTED: 3-oxoacyl-[acyl-carrier-protein] synthase II, chloroplastic-like [Sesamum indicum]               |

| #ID             | 0 h-1<br>FPKM | 0 h-2<br>FPKM | 0 h-3<br>FPKM | 28 h-1<br>FPKM | 28 h-2<br>FPKM | 28 h-3<br>FPKM | FDR       | log2FC   | regulated | nr_annotation                                                                                          |
|-----------------|---------------|---------------|---------------|----------------|----------------|----------------|-----------|----------|-----------|--------------------------------------------------------------------------------------------------------|
| c43229.graph_c0 | 2.85503296    | 2.67511969    | 3.30621343    | 12.7034746     | 14.2150149     | 14.6678424     | 1.603E-17 | 1.14212  | up        | unnamed protein product [Vitis vinifera]                                                               |
| c43231.graph_c0 | 69.6869052    | 72.5409009    | 71.2906911    | 13.1399256     | 13.8679272     | 13.2143262     | 0         | -3.49918 | down      | hypothetical protein MIMGU_mgv1a010924mg [Erythranthe<br>cattata]                                      |
| c43245.graph_c0 | 16.4294765    | 16.9589967    | 16.1993257    | 11.3468268     | 10.1814865     | 10.3926631     | 4.018E-88 | -1.72582 | down      | PREDICTED: uncharacterized protein LOC105163648 [Sesamum<br>indicum]                                   |
| c43246.graph_c0 | 20.8235224    | 19.9166689    | 19.5017282    | 84.9758521     | 84.5935067     | 89.5214275     | 1.444E-34 | 1.01508  | up        | unnamed protein product [Coffea canephora]                                                             |
| c43248.graph_c0 | 23.7665796    | 26.5266518    | 26.1501178    | 5.79459545     | 5.15723387     | 5.76407475     | 1.24E-110 | -3.2843  | down      | PREDICTED: cell cycle checkpoint protein KAD1 / [Sesamum<br>indicum]                                   |
| c43250.graph_c0 | 0.64251763    | 0.71462335    | 0.45870033    | 10.0659726     | 12.0400917     | 10.0766642     | 7.327E-19 | 3.06085  | up        | PREDICTED: uncharacterized protein LOC105177156 [Sesamum<br>indicum]                                   |
| c43250.graph_c1 | 0.83391374    | 0.34781199    | 0.44650507    | 7.62655323     | 8.2541544      | 8.77842847     | 2.264E-14 | 2.83755  | up        | PREDICTED: uncharacterized protein LOC102585981 isoform X1<br>[Solanum tuberosum]                      |
| c43252.graph_c0 | 14.5610972    | 16.23096      | 16.350503     | 11.1671522     | 11.0776162     | 11.7411165     | 4.932E-34 | -1.56359 | down      | PREDICTED: alkaline/neutral invertase CINV2 [Sesamum<br>indicum]                                       |
| c43257.graph_c0 | 4.51445744    | 3.49193754    | 4.74648263    | 35.8433314     | 33.3955571     | 31.8035044     | 3.741E-31 | 1.89374  | up        | PREDICTED: transcriptional regulator ATRX homolog [Solanum<br>tuberosum]                               |
| c43258.graph_c0 | 4.87535993    | 5.64525276    | 6.29889557    | 4.11798623     | 3.44145553     | 3.89163042     | 7.202E-12 | -1.64789 | down      | PREDICTED: zinc finger BED domain-containing protein<br>DAYSLEEPER-like isoform X1 [Sesamum indicum]   |
| c43259.graph_c0 | 0.03502619    | 0             | 0.09002008    | 11.6592299     | 9.88360768     | 10.8017356     | 4.227E-66 | 6.90452  | up        | PREDICTED: 1-acyl-sn-glycerol-3-phosphate acyltransferase-like<br>[Sesamum indicum]                    |
| c43260.graph_c0 | 1.47107704    | 1.3743801     | 1.44930072    | 10.5847861     | 11.4234332     | 12.2140795     | 1.072E-15 | 1.90419  | up        | PREDICTED: UPF0057 membrane protein At2g24040-like<br>[Sesamum indicum]                                |
| c43263.graph_c0 | 0.64995008    | 1.1325275     | 0.86614534    | 14.8362301     | 15.6862674     | 14.3476107     | 8.151E-69 | 2.98988  | up        | PREDICTED: oxysterol-binding protein-related protein 2A-like<br>isoform X3 [Sesamum indicum]           |
| c43264.graph_c0 | 1.89001568    | 2.01266834    | 1.96366615    | 13.6780717     | 9.6583461      | 11.3996819     | 1.981E-08 | 1.47524  | up        | PREDICTED: chlorophyll a-b binding protein CP26, chloroplastic<br>[Sesamum indicum]                    |
| c43269.graph_c0 | 66.6720576    | 61.9267217    | 58.9636536    | 29.0837587     | 27.2171864     | 31.4199761     | 6.95E-151 | -2.18491 | down      | PREDICTED: AP2-like ethylene-responsive transcription factor<br>At2g41710 isoform X1 [Sesamum indicum] |
| c43272.graph_c0 | 0.08719686    | 0.61098923    | 0             | 2.21809616     | 2.05995381     | 1.96508678     | 0.0019048 | 2.08141  | up        | PREDICTED: histone-lysine N-methyltransferase CLF isoform X3<br>[Sesamum indicum]                      |
| c43272.graph_c1 | 0.23600488    | 0.33073769    | 0.24262049    | 3.44769246     | 3.5775614      | 3.14920398     | 5.636E-15 | 2.56163  | up        | PREDICTED: histone-lysine N-methyltransferase CLF isoform X2<br>[Sesamum indicum]                      |
| c43274.graph_c0 | 0.08596319    | 0.05736618    | 0.14728813    | 1.20789929     | 1.27865771     | 1.35949787     | 6.566E-08 | 2.6267   | up        | PREDICTED: uncharacterized protein LOC105179654 [Sesamum<br>indicum]                                   |
| c43278.graph_c1 | 9.20153643    | 8.7773033     | 8.06837223    | 46.7740266     | 48.0222219     | 51.1999342     | 1.42E-32  | 1.39814  | up        | hypothetical protein MIMGU_mgv1a00972mg [Erythranthe<br>cattata]                                       |
| c43281.graph_c0 | 0.0623444     | 0.16641822    | 0.16023006    | 4.59157082     | 4.99127437     | 4.92984775     | 1.748E-37 | 4.12322  | up        | PREDICTED: probable beta-D-xylosidase 6 [Sesamum indicum]                                              |
| c43283.graph_c0 | 13.2937308    | 6.34000454    | 6.70797269    | 0              | 0              | 0              | 1.02E-15  | -Inf     | down      | glyceraldehyde 3-phosphate dehydrogenase [Cymbidium faberi]                                            |
| c43285.graph_c0 | 17.4310852    | 17.0272917    | 16.7356863    | 10.1575864     | 9.72366393     | 10.0486661     | 8.051E-85 | -1.86437 | down      | PREDICTED: pentatricopeptide repeat-containing protein<br>At2g15980 [Sesamum indicum]                  |

| #ID             | 0 h-1<br>FPKM | 0 h-2<br>FPKM | 0 h-3<br>FPKM | 28 h-1<br>FPKM | 28 h-2<br>FPKM | 28 h-3<br>FPKM | FDR       | log2FC   | regulated | nr_annotation                                                                                   |
|-----------------|---------------|---------------|---------------|----------------|----------------|----------------|-----------|----------|-----------|-------------------------------------------------------------------------------------------------|
| c43287.graph_c0 | 35.2367142    | 39.1911094    | 38.5723399    | 237.760498     | 240.22524      | 239.159373     | 1.587E-68 | 1.57451  | up        | PREDICTED: 60S ribosomal protein L31 [Eucalyptus grandis]                                       |
| c43288.graph_c0 | 10.2166752    | 5.68019914    | 6.86688603    | 0              | 0              | 0              | 4.374E-38 | -Inf     | down      | alpha-2 macroglobulin family-like protein [Micromonas sp. RCC7001]                              |
| c43296.graph_c0 | 0.58775737    | 0.05883459    | 0.1510583     | 4.57081172     | 4.78270831     | 4.46175108     | 2.045E-11 | 3.03976  | up        | hypothetical protein VITISV_034944 [Vitis vinifera]                                             |
| c43299.graph_c1 | 63.0447828    | 61.1304937    | 63.4629916    | 34.5397783     | 34.7048123     | 38.2929911     | 3.83E-100 | -1.89335 | down      | unnamed protein product [Coffea canephora]                                                      |
| c43304.graph_c0 | 0             | 0             | 0             | 4.74949132     | 3.0408267      | 4.29833298     | 3.341E-14 | Inf      | up        | metallothionein-like type 1 protein [Ipomoea batatas]                                           |
| c43305.graph_c2 | 2.61758962    | 2.27084931    | 2.82551329    | 38.048981      | 37.8130318     | 37.3606815     | 2.98E-103 | 2.78345  | up        | PREDICTED: probable methyltransferase PM126 [Sesamum indicum]                                   |
| c43305.graph_c3 | 1.65111495    | 1.71179574    | 1.81864122    | 31.5434048     | 30.9960195     | 27.7325468     | 7.557E-58 | 3.03053  | up        | PREDICTED: probable methyltransferase PM126 [Sesamum indicum]                                   |
| c43307.graph_c1 | 2.98925096    | 2.80124993    | 2.69708707    | 1.10939764     | 0.79299829     | 0.82982113     | 3.224E-15 | -2.72497 | down      | PREDICTED: uncharacterized protein LOC105160017 [Sesamum indicum]                               |
| c43309.graph_c0 | 2.05260369    | 2.36067211    | 1.57138205    | 8.77634844     | 9.72973821     | 8.22334032     | 8.179E-11 | 1.07158  | up        | hypothetical protein MIMGU_mgv1a002245mg [Erythranthe guttata]                                  |
| c43312.graph_c0 | 7.62454427    | 7.78636453    | 6.87828249    | 57.4858045     | 63.0735697     | 54.3986027     | 6.875E-68 | 1.88288  | up        | PREDICTED: IAA-amino acid hydrolase ILK1-like 4 [Sesamum indicum]                               |
| c43314.graph_c0 | 0.44278704    | 0.32659084    | 0.44920964    | 7.79131216     | 8.01358254     | 7.06251666     | 1.246E-39 | 3.13785  | up        | PREDICTED: LOW QUALITY PROTEIN; probable serine/threonine-protein kinase WNK3 [Sesamum indicum] |
| c43319.graph_c0 | 3.70325272    | 1.9247682     | 2.47092907    | 0              | 0              | 0              | 6.473E-18 | -Inf     | down      | predicted protein [Hordeum vulgare subsp. vulgare]                                              |
| c43322.graph_c0 | 2.64912464    | 3.5085054     | 2.35677465    | 26.8662961     | 33.5115284     | 29.367204      | 2.933E-30 | 2.30925  | up        | hypothetical protein MIMGU_mgv1a008052mg [Erythranthe guttata]                                  |
| c43323.graph_c0 | 22.9477132    | 24.0933197    | 20.7307919    | 24.5784969     | 23.4092458     | 24.0465581     | 9.155E-24 | -1.00103 | down      | Ribosome production factor 1 [Gossypium arboreum]                                               |
| c43328.graph_c0 | 0.87506275    | 0.82032382    | 0.66041493    | 0.70665619     | 0.57423985     | 0.79080093     | 3.856E-06 | -1.27128 | down      | PREDICTED: leucine-rich repeat receptor protein kinase EXS-like [Nicotiana tomentosiformis]     |
| c43336.graph_c0 | 20.0470329    | 20.8037649    | 18.3183192    | 12.4900447     | 12.0911679     | 11.3637073     | 2.23E-102 | -1.80866 | down      | PREDICTED: uncharacterized protein LOC105160884 [Sesamum indicum]                               |
| c43338.graph_c1 | 34.1207419    | 32.3690311    | 34.6759935    | 11.8320874     | 14.122399      | 16.2678228     | 2.943E-62 | -2.35059 | down      | PREDICTED: calcium-dependent protein kinase 26-like [Sesamum indicum]                           |
| c43342.graph_c0 | 1.80407069    | 1.54603875    | 1.70120022    | 11.7818276     | 11.9495225     | 11.8306854     | 4.27E-46  | 1.7254   | up        | PREDICTED: tRNA(adenine(34)) deaminase, chloroplastic [Sesamum indicum]                         |
| c43345.graph_c0 | 0             | 0.04589777    | 0             | 0.53319785     | 0.42124921     | 0.4486815      | 6.333E-08 | 3.85234  | up        | PREDICTED: uncharacterized protein LOC105155881 [Sesamum indicum]                               |
| c43349.graph_c0 | 0.84691833    | 0.93700496    | 1.37472453    | 6.57650941     | 8.33656082     | 7.00537026     | 2.176E-10 | 1.69726  | up        | Transcription factor SPEECHLESS [Glycine soja]                                                  |
| c43349.graph_c1 | 19.9871317    | 19.500208     | 17.6579257    | 14.9682172     | 15.8412314     | 15.8581031     | 6.63E-43  | -1.38111 | down      | PREDICTED: protein DEFECTIVE IN MERISTEM SILENCING 3-like [Sesamum indicum]                     |
| c43350.graph_c0 | 3.31847026    | 3.0993517     | 2.96982609    | 2.79946302     | 2.95540923     | 2.92571105     | 5.678E-16 | -1.2022  | down      | PREDICTED: pentatricopeptide repeat-containing protein At2g32630 [Sesamum indicum]              |
| c43360.graph_c0 | 3.59412775    | 3.66968126    | 4.71096839    | 23.0656495     | 20.3072348     | 23.1270658     | 7.082E-20 | 1.37954  | up        | PREDICTED: palmitoyl-protein thioesterase 1-like [Sesamum indicum]                              |
| c43361.graph_c0 | 20.3230543    | 22.0975153    | 20.5686972    | 10.0024365     | 10.1110872     | 10.5319011     | 5.19E-119 | -2.12968 | down      | hypothetical protein MIMGU_mgv1a001151mg [Erythranthe guttata]                                  |
| c43362.graph_c0 | 59.988471     | 58.8307072    | 59.168611     | 32.4103815     | 29.1407087     | 39.3785255     | 5.51E-106 | -1.90753 | down      | PREDICTED: protein SRG1-like [Citrus sinensis]                                                  |

| #ID             | 0 h-1<br>FPKM | 0 h-2<br>FPKM | 0 h-3<br>FPKM | 28 h-1<br>FPKM | 28 h-2<br>FPKM | 28 h-3<br>FPKM | FDR       | log2FC   | regulated | nr_annotation                                                                                    |
|-----------------|---------------|---------------|---------------|----------------|----------------|----------------|-----------|----------|-----------|--------------------------------------------------------------------------------------------------|
| c43363.graph_c0 | 7.46029793    | 8.54862949    | 8.45150184    | 6.27822284     | 5.79747946     | 5.35584123     | 1.239E-10 | -1.58102 | down      | -                                                                                                |
| c43363.graph_c2 | 12.8422355    | 12.2228772    | 12.038914     | 8.83637741     | 9.84350558     | 10.1133049     | 1.511E-23 | -1.45538 | down      | hypothetical protein MIMGU_mgv1a021390mg, partial [Erythranthe guttata]                          |
| c43367.graph_c0 | 1.40385711    | 1.7608113     | 1.84748214    | 0.70069843     | 0.81025516     | 0.99306413     | 5.196E-14 | -2.09341 | down      | PREDICTED: centromere-associated protein E isoform X1 [Sesamum indicum]                          |
| c43369.graph_c0 | 2.37230986    | 2.10388792    | 2.13930673    | 11.4189189     | 11.9352666     | 12.3907491     | 1.533E-21 | 1.34457  | up        | PREDICTED: B2 protein [Sesamum indicum]                                                          |
| c43372.graph_c0 | 13.468978     | 13.423071     | 11.8946014    | 10.0910444     | 8.61481976     | 9.70334773     | 4.659E-65 | -1.53781 | down      | PREDICTED: nuclear pore complex protein NUP214 [Sesamum indicum]                                 |
| c43375.graph_c0 | 16.5546918    | 17.9359616    | 16.3680307    | 126.971454     | 149.969308     | 131.536694     | 4.436E-47 | 1.91513  | up        | hypothetical protein MIMGU_mgv1a007068mg [Erythranthe guttata]                                   |
| c43376.graph_c0 | 1.45034717    | 1.01625963    | 2.23650424    | 8.0814637      | 7.93130871     | 7.36853459     | 1.364E-06 | 1.21523  | up        | PREDICTED: transmembrane protein 64-like 1 [Arenaria baseliana]                                  |
| c43381.graph_c0 | 2.1997349     | 2.1120626     | 2.48061422    | 13.8667495     | 12.8738911     | 14.5366454     | 7.016E-15 | 1.5115   | up        | PREDICTED: caffeoyl-CoA O-methyltransferase-like [Sesamum indicum]                               |
| c43386.graph_c0 | 18.1090614    | 17.5927321    | 15.8379077    | 14.519757      | 14.7158786     | 13.2993175     | 8.173E-33 | -1.36636 | down      | PREDICTED: vacuolar protein sorting-associated protein VTA1 homolog [Sesamum indicum]            |
| c43387.graph_c0 | 11.575851     | 11.5874424    | 14.8754268    | 1.18496645     | 0.32097408     | 0.38676918     | 3.503E-37 | -5.42452 | down      | PREDICTED: uncharacterized protein LOC104587006 isoform X2 [Nelumbo nucifera]                    |
| c43389.graph_c0 | 0.02750534    | 0.01376644    | 0.03534545    | 1.37935972     | 1.57935281     | 1.29682505     | 9.601E-21 | 4.69855  | up        | PREDICTED: ABC transporter C family member 8-like isoform X3 [Sesamum indicum]                   |
| c43390.graph_c0 | 19.6959177    | 18.6887839    | 17.0616747    | 12.0568776     | 12.3479853     | 10.4293078     | 4.151E-70 | -1.76015 | down      | hypothetical protein MIMGU_mgv1a008049mg [Erythranthe guttata]                                   |
| c43392.graph_c0 | 0.8192594     | 0.72895979    | 0.70185384    | 6.66554175     | 5.94368977     | 6.07335592     | 1.08E-18  | 1.96477  | up        | PREDICTED: probable receptor-like protein kinase At5g18500 [Sesamum indicum]                     |
| c43393.graph_c0 | 2.1698033     | 1.3637989     | 1.49140726    | 1.50365167     | 2.15238222     | 1.61600595     | 0.0023976 | -1.01822 | down      | hypothetical protein MIMGU_mgv1a0000292mg, partial [Erythranthe guttata]                         |
| c43400.graph_c1 | 21.7139436    | 20.1424951    | 20.0143925    | 16.5527452     | 15.592141      | 16.9229607     | 9.911E-44 | -1.42385 | down      | PREDICTED: putative G3BP-like protein isoform X2 [Sesamum indicum]                               |
| c43403.graph_c0 | 0.4404849     | 0.94064209    | 0.67924864    | 4.82347108     | 4.91398781     | 4.85893686     | 2.572E-10 | 1.73155  | up        | -                                                                                                |
| c43406.graph_c1 | 17.927768     | 17.6133918    | 9.81243534    | 4.10197359     | 5.01088492     | 4.134748       | 2.414E-08 | -2.85954 | down      | -                                                                                                |
| c43407.graph_c0 | 213.601327    | 203.116589    | 209.315054    | 58.2213397     | 64.2235394     | 61.4591867     | 0         | -2.85778 | down      | PREDICTED: uncharacterized protein LOC105176746 isoform X1 [Sesamum indicum]                     |
| c43412.graph_c0 | 0.23895416    | 0.31892458    | 0.25588796    | 38.2943461     | 40.5087803     | 37.1526117     | 4.78E-188 | 6.0639   | up        | PREDICTED: uncharacterized protein LOC105177232 [Sesamum indicum]                                |
| c43416.graph_c1 | 0.26646774    | 0.26673457    | 0.1712108     | 3.87334435     | 3.75956179     | 2.84455562     | 1.218E-07 | 2.80831  | up        | hypothetical protein POPTR_0004s25860g, partial [Populus trichocarpa]                            |
| c43418.graph_c0 | 24.5804177    | 24.3306257    | 22.4278093    | 22.8679651     | 21.8069338     | 22.6702723     | 5.132E-38 | -1.17237 | down      | PREDICTED: UBX domain-containing protein 4 [Sesamum indicum]                                     |
| c43421.graph_c0 | 1.19591357    | 0.88928253    | 1.09771163    | 7.40047316     | 6.7267786      | 7.96382278     | 1.089E-12 | 1.70555  | up        | PREDICTED: GD11-like protein 2, chloroplastic [Sesamum indicum]                                  |
| c43426.graph_c0 | 133.800454    | 122.405109    | 138.516376    | 30.2768716     | 31.5476355     | 30.4969438     | 1.06E-101 | -3.18749 | down      | PREDICTED: F-box protein SKIP23-like [Sesamum indicum]                                           |
| c43433.graph_c0 | 73.5132952    | 69.2945357    | 66.3677534    | 15.2556006     | 17.1635578     | 16.9725984     | 0         | -3.17161 | down      | PREDICTED: probable 1-acylglycerol-3-phosphate O-acyltransferase [Beta vulgaris subsp. vulgaris] |

| #ID             | 0 h-1<br>FPKM | 0 h-2<br>FPKM | 0 h-3<br>FPKM | 28 h-1<br>FPKM | 28 h-2<br>FPKM | 28 h-3<br>FPKM | FDR       | log2FC   | regulated | nr_annotation                                                                                     |
|-----------------|---------------|---------------|---------------|----------------|----------------|----------------|-----------|----------|-----------|---------------------------------------------------------------------------------------------------|
| c43435.graph_c0 | 0             | 0             | 0             | 1.04249436     | 0.87635917     | 1.70133377     | 2.587E-06 | Inf      | up        | predicted protein [Hordeum vulgare subsp. vulgare]                                                |
| c43443.graph_c0 | 0.21466815    | 0.10744156    | 0.13792854    | 0.98812398     | 1.1504469      | 1.3155439      | 0.0001193 | 1.82348  | up        | PREDICTED: CD11-like protein a, chloroplastic [Sesamum indicum]                                   |
| c43444.graph_c0 | 82.7826441    | 75.1905826    | 76.1535934    | 17.7044036     | 18.5535654     | 17.9043713     | 0         | -3.20173 | down      | PREDICTED: probable polygalacturonase At1g80170 [Sesamum indicum]                                 |
| c43453.graph_c0 | 8.57484837    | 10.4126914    | 8.87714932    | 6.64081597     | 5.86425322     | 7.074281       | 1.836E-21 | -1.59879 | down      | PREDICTED: uncharacterized protein LOC105177800 [Sesamum indicum]                                 |
| c43454.graph_c0 | 2.54483334    | 2.21511444    | 2.65408478    | 25.7063453     | 23.3072306     | 23.1853368     | 3.245E-49 | 2.19194  | up        | hypothetical protein MIMGU_mgv1a003626mg [Erythranthe outtata]                                    |
| c43456.graph_c1 | 2.94332776    | 2.59272205    | 4.91698052    | 0.21391937     | 0.19314913     | 0.59349195     | 2.032E-07 | -4.47779 | down      | PREDICTED: putative Myb family transcription factor At1g14600 [Sesamum indicum]                   |
| c43457.graph_c0 | 0             | 0             | 0             | 1.51584677     | 1.5102538      | 3.19892737     | 4.491E-05 | Inf      | up        | ADP ribosylation factor [Karlodinium veneficum]                                                   |
| c43463.graph_c0 | 1.62124122    | 2.20245917    | 1.87502324    | 9.0561446      | 8.70880065     | 8.2825525      | 5.43E-11  | 1.1007   | up        | F3H9.11 protein isoform 5 [Theobroma cacao]                                                       |
| c43466.graph_c0 | 32.9210148    | 31.8206423    | 27.6436176    | 26.8068821     | 26.404474      | 28.0464909     | 3.42E-42  | -1.27325 | down      | PREDICTED: 50S ribosomal protein L3-2, chloroplastic-like [Sesamum indicum]                       |
| c43467.graph_c0 | 0.07717569    | 0.38626486    | 0.29752146    | 5.72126659     | 5.67221508     | 5.30928226     | 2.063E-12 | 3.35723  | up        | hypothetical protein VITISV_020777 [Vitis vinifera]                                               |
| c43471.graph_c0 | 0.01644231    | 0             | 0             | 7.68396372     | 6.45235378     | 6.64059902     | 2.865E-94 | 9.24433  | up        | PREDICTED: pentatricopeptide repeat-containing protein MRL1, chloroplastic [Sesamum indicum]      |
| c43477.graph_c0 | 25.4891655    | 22.8653083    | 26.026218     | 16.9362942     | 17.0664997     | 16.4814839     | 1.513E-41 | -1.6504  | down      | PREDICTED: high mobility group B protein 14-like isoform X2 [Nelumbo nucifera]                    |
| c43479.graph_c0 | 0.38280194    | 0.07663705    | 0.29514939    | 2.22574595     | 2.76325487     | 2.86050006     | 3.061E-06 | 2.28985  | up        | PREDICTED: diacylglycerol kinase 4-like [Sesamum indicum]                                         |
| c43480.graph_c1 | 1.0337102     | 1.09561267    | 1.40649726    | 1.10484502     | 0.31922287     | 0.68517383     | 6.573E-06 | -1.83912 | down      | -                                                                                                 |
| c43481.graph_c0 | 2.48324815    | 1.42041986    | 1.08268521    | 0.06445752     | 0.37829411     | 0.23668563     | 4.729E-06 | -3.95763 | down      | -                                                                                                 |
| c43483.graph_c0 | 0.52873211    | 0.45365276    | 0.42707764    | 0.40623828     | 0.43618874     | 0.43003734     | 0.0003977 | -1.23561 | down      | hypothetical protein MIMGU_mgv1a00060/mg [Erythranthe outtata]                                    |
| c43488.graph_c1 | 56.2874843    | 53.5079984    | 55.470229     | 38.2814631     | 37.5978394     | 39.2401389     | 2.796E-81 | -1.61198 | down      | hypothetical protein CISIN_1g018310mg [Citrus sinensis]                                           |
| c43489.graph_c0 | 0.28202774    | 0.16132008    | 0.38830372    | 1.2005745      | 1.25586085     | 1.44559436     | 0.0014402 | 1.13398  | up        | PREDICTED: pentatricopeptide repeat-containing protein At1g43980, mitochondrial [Sesamum indicum] |
| c43491.graph_c0 | 1.70550907    | 1.62961611    | 1.89278576    | 12.1701681     | 12.0822855     | 11.9307021     | 1.209E-17 | 1.69882  | up        | PREDICTED: cytochrome b561 and DOMON domain-containing protein At4g17280 [Sesamum indicum]        |
| c43493.graph_c0 | 89.8759357    | 92.2204127    | 87.608149     | 36.2994491     | 37.029158      | 41.0998556     | 4.28E-175 | -2.32653 | down      | PREDICTED: E3 ubiquitin-protein ligase RNF170-like [Sesamum indicum]                              |
| c43494.graph_c0 | 0.83879053    | 1.02621499    | 1.25752554    | 7.28166922     | 7.15568145     | 6.2181446      | 5.257E-09 | 1.62966  | up        | PREDICTED: uncharacterized protein LOC105160516 isoform X2 [Sesamum indicum]                      |
| c43495.graph_c0 | 39.2122608    | 34.8156935    | 40.388011     | 33.7227535     | 35.7757476     | 36.7488811     | 9.153E-20 | -1.19794 | down      | PREDICTED: jmjC domain-containing protein / [Sesamum indicum]                                     |
| c43496.graph_c0 | 0.89059982    | 0.89149162    | 1.14445602    | 8.6920835      | 7.97337266     | 7.99811628     | 2.454E-10 | 1.98097  | up        | -                                                                                                 |
| c43498.graph_c0 | 2.73053086    | 2.57658109    | 2.45842311    | 1.56740272     | 1.70054385     | 1.93911057     | 2.599E-19 | -1.66516 | down      | PREDICTED: chromosome transmission fidelity protein 18 homolog [Sesamum indicum]                  |

| #ID             | 0 h-1<br>FPKM | 0 h-2<br>FPKM | 0 h-3<br>FPKM | 28 h-1<br>FPKM | 28 h-2<br>FPKM | 28 h-3<br>FPKM | FDR       | log2FC   | regulated | nr_annotation                                                                             |
|-----------------|---------------|---------------|---------------|----------------|----------------|----------------|-----------|----------|-----------|-------------------------------------------------------------------------------------------|
| c43504.graph_c0 | 85.2011869    | 75.5729352    | 75.8802576    | 346.482786     | 346.62311      | 360.276068     | 5.168E-41 | 1.06504  | up        | PREDICTED: 40S ribosomal protein S12-like [Sesamum indicum]                               |
| c43506.graph_c0 | 1.21393017    | 1.65971125    | 1.82628098    | 0.58101198     | 0.3691625      | 0.47410103     | 1.266E-11 | -2.81695 | down      | PREDICTED: uncharacterized protein LOC105528554 [Prunus mume]                             |
| c43510.graph_c2 | 33.25454      | 31.5453352    | 29.0803104    | 34.4651161     | 30.8036417     | 29.867607      | 1.173E-26 | -1.07006 | down      | PREDICTED: dynamin-related protein 3A-like [Nicotiana glauca]                             |
| c43511.graph_c0 | 22.2370477    | 23.6881221    | 21.2868068    | 16.35286       | 15.0608943     | 15.6605869     | 3.451E-57 | -1.60351 | down      | PREDICTED: uncharacterized protein LOC105169670 [Sesamum indicum]                         |
| c43512.graph_c0 | 3.3210317     | 3.14170022    | 3.6579919     | 15.3575404     | 13.9143169     | 15.1072125     | 3.959E-11 | 1.04077  | up        | PREDICTED: malonyl-CoA-acyl carrier protein transacylase, mitochondrial [Sesamum indicum] |
| c43522.graph_c0 | 63.0121231    | 63.8412191    | 60.1075259    | 39.0707075     | 38.1803348     | 38.4618762     | 1.44E-106 | -1.78207 | down      | PREDICTED: TOM1-like protein 2 isoform X2 [Sesamum indicum]                               |
| c43525.graph_c0 | 1.21988665    | 1.17502863    | 1.24225115    | 1.35500252     | 1.41979483     | 1.07837047     | 0.0003841 | -1.00888 | down      | PREDICTED: putative U-box domain-containing protein 50 [Sesamum indicum]                  |
| c43530.graph_c0 | 6.447602      | 6.97384823    | 5.8387215     | 52.2387841     | 45.0085839     | 46.1679301     | 2.873E-42 | 1.80736  | up        | hypothetical protein MIMGU_mgv1a026892mg [Erythranthe diffusa]                            |
| c43539.graph_c0 | 30.3404579    | 29.7981048    | 28.6339145    | 23.1948403     | 22.6010827     | 21.8487664     | 1.943E-73 | -1.48217 | down      | PREDICTED: autophagy-related protein 18f [Sesamum indicum]                                |
| c43541.graph_c0 | 0.94771995    | 0.94866895    | 0.635404      | 8.08588253     | 8.30127295     | 6.74463665     | 3.13E-14  | 2.10513  | up        | PREDICTED: DNA-3-methyladenine glycosylase isoform X1 [Sesamum indicum]                   |
| c43545.graph_c0 | 14.1602913    | 13.4182404    | 13.6660707    | 9.62991354     | 10.1440605     | 9.67306688     | 1.871E-60 | -1.57646 | down      | PREDICTED: probable beta-1,4-xylosyltransferase IRX10L [Sesamum indicum]                  |
| c43547.graph_c0 | 2.7057567     | 2.22613652    | 2.02428343    | 20.3791605     | 18.4612791     | 16.03572       | 1.043E-23 | 1.8918   | up        | PREDICTED: protein LHY-like [Sesamum indicum]                                             |
| c43548.graph_c0 | 29.7826751    | 31.9806796    | 28.1588526    | 16.6607656     | 14.9009697     | 15.072306      | 9.28E-104 | -2.03702 | down      | unnamed protein product [Coffea canephora]                                                |
| c43550.graph_c0 | 2.08605274    | 1.87932745    | 1.80944574    | 0.41693606     | 0.20533864     | 0.58764654     | 9.406E-18 | -3.34004 | down      | PREDICTED: subtilisin-like protease SDD1, partial [Sesamum indicum]                       |
| c43552.graph_c1 | 2.18504381    | 2.08430324    | 1.81685564    | 0.28024893     | 0.50607701     | 0.42687089     | 1.151E-31 | -3.4151  | down      | hypothetical protein MIMGU_mgv1a00571/mg [Erythranthe diffusa]                            |
| c43557.graph_c0 | 0.2422373     | 0.40413311    | 0.4496332     | 1.64319564     | 1.9428771      | 1.58026891     | 0.0018529 | 1.13931  | up        | PREDICTED: pentatricopeptide repeat-containing protein At4g02750-like [Sesamum indicum]   |
| c43560.graph_c0 | 11.7519198    | 10.9725245    | 12.0214053    | 12.1196912     | 11.5296295     | 11.2035677     | 6.81E-34  | -1.08683 | down      | PREDICTED: protein HASTY 1 [Sesamum indicum]                                              |
| c43561.graph_c0 | 10.9970005    | 12.3241878    | 11.9811231    | 3.27231484     | 3.73899885     | 3.54448963     | 2.619E-81 | -2.83313 | down      | PREDICTED: uncharacterized protein LOC105156369 [Sesamum indicum]                         |
| c43567.graph_c0 | 0.53306695    | 0.50551648    | 0.43263924    | 6.18868421     | 5.34845589     | 5.98169595     | 3.565E-37 | 2.48615  | up        | PREDICTED: uncharacterized protein LOC105158074 [Sesamum indicum]                         |
| c43568.graph_c0 | 89.4368897    | 94.3236194    | 84.0180281    | 62.9779647     | 57.7106826     | 59.0301064     | 5.412E-90 | -1.6649  | down      | PREDICTED: nucleolin [Sesamum indicum]                                                    |
| c43573.graph_c0 | 1.22333915    | 1.36062682    | 1.68848659    | 0.09879065     | 0              | 0.2149663      | 4.226E-24 | -4.85354 | down      | PREDICTED: phospholipase D delta-like [Vitis vinifera]                                    |
| c43574.graph_c0 | 76.5668623    | 74.5711822    | 80.2836467    | 42.5068        | 43.5290806     | 46.3294487     | 2.387E-81 | -1.89693 | down      | PREDICTED: uncharacterized Rho GTPase-activating protein At5g61530 [Sesamum indicum]      |
| c43575.graph_c1 | 23.4937614    | 25.1418363    | 23.0400524    | 15.8955983     | 16.5329632     | 17.0956292     | 5.515E-36 | -1.62322 | down      | PREDICTED: ELMO domain-containing protein A [Sesamum indicum]                             |
| c43575.graph_c2 | 23.3680183    | 20.2602832    | 25.2998793    | 16.0476293     | 17.5081515     | 16.2047339     | 1.086E-15 | -1.56241 | down      | PREDICTED: ELMO domain-containing protein A [Sesamum indicum]                             |



| #ID             | 0 h-1<br>FPKM | 0 h-2<br>FPKM | 0 h-3<br>FPKM | 28 h-1<br>FPKM | 28 h-2<br>FPKM | 28 h-3<br>FPKM | FDR       | log2FC   | regulated | nr_annotation                                                                                  |
|-----------------|---------------|---------------|---------------|----------------|----------------|----------------|-----------|----------|-----------|------------------------------------------------------------------------------------------------|
| c43582.graph_c0 | 1.52428048    | 1.55211383    | 1.6210434     | 7.62116327     | 7.01916472     | 6.54611263     | 3.446E-08 | 1.08142  | up        | PREDICTED: uncharacterized protein LOC105156687 isoform X2 [Sesamum indicum]                   |
| c43583.graph_c0 | 15.6639298    | 13.8110597    | 13.5060917    | 9.23143541     | 10.2258349     | 10.3004092     | 4.17E-40  | -1.61917 | down      | PREDICTED: solute carrier family 25 member 44-like [Sesamum indicum]                           |
| c43584.graph_c0 | 2.92859049    | 3.715535      | 3.06319571    | 31.5064938     | 31.0619793     | 33.1006435     | 4.984E-67 | 2.21081  | up        | PREDICTED: nodulation-signaling pathway 1 protein [Sesamum indicum]                            |
| c43587.graph_c0 | 0             | 0.07643826    | 0             | 1.83147732     | 2.5055338      | 2.2643493      | 4.385E-15 | 5.35059  | up        | PREDICTED: vacuolar cation/proton exchanger 5-like [Sesamum indicum]                           |
| c43590.graph_c0 | 4.33573558    | 3.72006614    | 3.18376679    | 2.77027484     | 3.06409059     | 2.34529121     | 2.627E-10 | -1.54649 | down      | PREDICTED: uncharacterized protein LOC101267356 [Solanum lycopersicum]                         |
| c43592.graph_c0 | 0             | 0             | 0             | 2.95901246     | 3.55008149     | 2.71221178     | 3.566E-17 | Inf      | up        | PREDICTED: suppressor of disruption of 1FUS-like [Sesamum indicum]                             |
| c43602.graph_c0 | 6.79684083    | 6.32526542    | 6.96007325    | 2.95236495     | 3.03159033     | 3.60578563     | 5.838E-46 | -2.15654 | down      | PREDICTED: DDT domain-containing protein DDB_G0282237 [Sesamum indicum]                        |
| c43605.graph_c0 | 154.036641    | 143.834088    | 152.571266    | 95.5646507     | 98.8299558     | 104.477757     | 6.075E-94 | -1.68211 | down      | PREDICTED: probable proteasome inhibitor [Sesamum indicum]                                     |
| c43607.graph_c0 | 1.63943401    | 1.39613899    | 1.88663069    | 11.5418469     | 10.8065814     | 13.6699626     | 6.764E-16 | 1.77941  | up        | -                                                                                              |
| c43609.graph_c0 | 4.54861651    | 4.852722      | 4.92223352    | 24.3854233     | 23.7929959     | 24.732679      | 3.73E-45  | 1.25649  | up        | PREDICTED: 116 kDa U5 small nuclear ribonucleoprotein component-like [Sesamum indicum]         |
| c43611.graph_c0 | 0             | 0             | 0             | 0.42889202     | 0.42730955     | 0.83269292     | 1.069E-05 | Inf      | up        | --                                                                                             |
| c43613.graph_c0 | 10.485471     | 8.67777099    | 10.2913528    | 0.78007983     | 0.48761927     | 0.29378713     | 4.909E-74 | -5.33096 | down      | PREDICTED: benzoate carboxyl methyltransferase-like [Sesamum indicum]                          |
| c43614.graph_c0 | 0.05233699    | 0.23575227    | 0.10088265    | 1.65466254     | 1.42531524     | 1.84681314     | 1.422E-08 | 2.57255  | up        | PREDICTED: taxadiene 5-alpha hydroxylase [Sesamum indicum]                                     |
| c43620.graph_c0 | 0.53285022    | 0.33336487    | 0.42795852    | 1.98477141     | 2.62253047     | 2.291081       | 0.0031113 | 1.32529  | up        | PREDICTED: uncharacterized protein LOC105161412 [Sesamum indicum]                              |
| c43623.graph_c0 | 17.8156993    | 16.3125549    | 16.5968419    | 14.632461      | 15.0065428     | 13.449361      | 6.399E-34 | -1.32573 | down      | PREDICTED: uncharacterized protein LOC105169540 isoform X1 [Sesamum indicum]                   |
| c43628.graph_c0 | 35.8837256    | 37.9151942    | 36.6382622    | 37.589221      | 34.5813081     | 36.160086      | 2.534E-37 | -1.11836 | down      | PREDICTED: uncharacterized protein LOC105165517 [Sesamum indicum]                              |
| c43629.graph_c0 | 1.70328902    | 1.47249534    | 1.54210474    | 6.78053851     | 7.29074142     | 6.5430135      | 1.721E-05 | 1.03741  | up        | PREDICTED: uncharacterized protein LOC105176133 [Sesamum indicum]                              |
| c43633.graph_c0 | 0             | 0             | 0             | 3.01758632     | 5.5925949      | 5.57263205     | 2.023E-09 | Inf      | up        | hypothetical protein SELMODKAF1_221599 [Selaginella moellendorffii]                            |
| c43638.graph_c0 | 0.41890706    | 0.35169322    | 0.45148762    | 2.51424405     | 2.50068638     | 2.68471436     | 2.948E-10 | 1.56367  | up        | PREDICTED: protein ROS1-like isoform X1 [Sesamum indicum]                                      |
| c43640.graph_c0 | 18.2771894    | 18.2954912    | 17.668696     | 12.106157      | 11.3480796     | 11.8632108     | 1.915E-86 | -1.70899 | down      | PREDICTED: LOW QUALITY PROTEIN: ubiquitin carboxyl-terminal hydrolase 2-like [Sesamum indicum] |
| c43647.graph_c0 | 1.84630568    | 1.23210298    | 0.86994449    | 7.17908114     | 7.06764177     | 7.08078435     | 3.741E-09 | 1.35141  | up        | PREDICTED: uncharacterized protein LOC105166821 isoform X5 [Sesamum indicum]                   |
| c43650.graph_c0 | 0.63211513    | 0.80531576    | 0.29537926    | 5.84713354     | 4.78918212     | 4.46449237     | 1.445E-07 | 2.04098  | up        | PREDICTED: solute carrier family 35 member F1-like isoform X2 [Sesamum indicum]                |
| c43652.graph_c0 | 116.078884    | 121.311759    | 105.998491    | 49.7433397     | 49.9825577     | 48.735309      | 1.66E-157 | -2.29911 | down      | PREDICTED: protein SMG7-like [Sesamum indicum]                                                 |

| #ID             | 0 h-1<br>FPKM | 0 h-2<br>FPKM | 0 h-3<br>FPKM | 28 h-1<br>FPKM | 28 h-2<br>FPKM | 28 h-3<br>FPKM | FDR       | log2FC   | regulated | nr_annotation                                                                                              |
|-----------------|---------------|---------------|---------------|----------------|----------------|----------------|-----------|----------|-----------|------------------------------------------------------------------------------------------------------------|
| c43655.graph_c0 | 1.13897041    | 1.49779277    | 1.23403429    | 8.21304603     | 8.19234443     | 8.31762232     | 2.852E-18 | 1.58451  | up        | PREDICTED: pentatricopeptide repeat-containing protein At1g79490, mitochondrial [Sesamum indicum]          |
| c43656.graph_c0 | 0.22641141    | 0.05665953    | 0.14547381    | 1.89237685     | 2.48866965     | 1.64487041     | 1.843E-07 | 2.72562  | up        | -                                                                                                          |
| c43658.graph_c0 | 1.05304781    | 1.51240762    | 1.23553786    | 7.25417825     | 5.7686689      | 6.89685759     | 2.119E-06 | 1.29882  | up        | PREDICTED: potassium transporter 8-like [Sesamum indicum]                                                  |
| c43663.graph_c0 | 43.7727795    | 43.181588     | 39.4020021    | 23.2071709     | 21.7270329     | 23.1112128     | 3.86E-119 | -1.98193 | down      | PREDICTED: VIN3-like protein 2 isoform X2 [Sesamum indicum]                                                |
| c43666.graph_c0 | 3.08869046    | 2.41309917    | 2.75900126    | 14.20821       | 15.3252071     | 13.8499916     | 2.321E-14 | 1.30275  | up        | PREDICTED: uncharacterized protein LOC105173066 [Sesamum indicum]                                          |
| c43670.graph_c0 | 1.26944227    | 1.31378845    | 1.02300834    | 11.5875234     | 12.6933064     | 11.7649247     | 1.046E-42 | 2.23334  | up        | PREDICTED: ABC transporter B family member 15-like [Sesamum indicum]                                       |
| c43680.graph_c0 | 2.45376842    | 4.86019088    | 3.48863527    | 1.66955168     | 2.22691275     | 2.38409593     | 0.0007735 | -1.87408 | down      | PREDICTED: probable receptor protein kinase TMK1 [Sesamum indicum]                                         |
| c43684.graph_c0 | 1.42779806    | 1.60246751    | 1.64944602    | 14.2030744     | 13.4676128     | 13.4884043     | 2.204E-61 | 2.04453  | up        | PREDICTED: villin-4-like [Sesamum indicum]                                                                 |
| c43685.graph_c0 | 5.92846234    | 5.23164104    | 6.0812816     | 5.15918784     | 6.07451132     | 5.72108519     | 3.257E-14 | -1.1155  | down      | PREDICTED: uncharacterized protein LOC105159738 isoform X2 [Sesamum indicum]                               |
| c43685.graph_c1 | 0.34445747    | 0.30423741    | 0.15622641    | 42.10293       | 39.4244385     | 36.9151968     | 9.27E-260 | 6.11915  | up        | PREDICTED: LOW QUALITY PROTEIN: LRR receptor-like serine/threonine-protein kinase ERECTA [Sesamum indicum] |
| c43693.graph_c0 | 0.28960345    | 0.09663115    | 0             | 1.89433904     | 2.59729009     | 2.11827081     | 1.975E-07 | 3.03189  | up        | PREDICTED: uncharacterized protein LOC105171344 [Sesamum indicum]                                          |
| c43694.graph_c0 | 0.17641527    | 0.13244394    | 0             | 7.24429429     | 6.59880276     | 7.96454104     | 2.008E-59 | 5.07381  | up        | PREDICTED: probable LRR receptor-like serine/threonine-protein kinase At1g67720 [Sesamum indicum]          |
| c43698.graph_c0 | 1.74698648    | 1.35385999    | 0.86901166    | 8.76502377     | 9.31928344     | 8.48904536     | 5.826E-09 | 1.65994  | up        | PREDICTED: coiled-coil domain-containing protein 93 [Sesamum indicum]                                      |
| c43703.graph_c0 | 2.77519777    | 2.0896285     | 2.7141288     | 2.49893526     | 2.30465362     | 2.65084399     | 2.861E-07 | -1.11438 | down      | PREDICTED: protein hunchback-like [Sesamum indicum]                                                        |
| c43708.graph_c0 | 43.6127045    | 46.8695278    | 41.6580484    | 18.1431338     | 18.6446745     | 19.1626594     | 1.75E-164 | -2.32941 | down      | PREDICTED: uncharacterized protein LOC105161926 [Sesamum indicum]                                          |
| c43712.graph_c0 | 3.25390864    | 3.053594      | 2.926981      | 14.1304092     | 12.5182131     | 14.3766902     | 1.906E-09 | 1.06257  | up        | PREDICTED: mitochondrial ribosome-associated GTPase 1 [Sesamum indicum]                                    |
| c43713.graph_c0 | 1.47369333    | 1.19857482    | 1.42031571    | 35.9311124     | 36.3258459     | 35.287179      | 1.99E-185 | 3.62503  | up        | PREDICTED: fatty-acid-binding protein 1-like [Nicotiana glauca]                                            |
| c43715.graph_c0 | 0.08498505    | 0.04253508    | 0.10920916    | 0.74119976     | 0.73894575     | 0.70561511     | 9.784E-06 | 2.11036  | up        | hypothetical protein MIMGU_mgv1a021755mg, partial [Erythranthe guttata]                                    |
| c43717.graph_c0 | 2.026549      | 1.50843       | 1.20193648    | 0              | 0              | 0              | 4.613E-31 | -Inf     | down      | glutathione peroxidase [Micromonas pusilla CCMP1545]                                                       |
| c43730.graph_c0 | 0.62776199    | 0.86403708    | 0.40334951    | 4.33441108     | 3.39862381     | 4.9329667      | 0.0001237 | 1.65732  | up        | PREDICTED: basic leucine zipper 43-like [Sesamum indicum]                                                  |
| c43731.graph_c2 | 20.2268938    | 20.1556699    | 22.3910084    | 4.58292695     | 4.57773583     | 5.07650388     | 8.695E-87 | -3.23194 | down      | hypothetical protein MIMGU_mgv1a004451mg [Erythranthe guttata]                                             |
| c43738.graph_c0 | 4.8886825     | 4.19881056    | 4.45955132    | 1.16242291     | 1.14857389     | 1.14539183     | 4.11E-48  | -3.0604  | down      | Wee1-like protein kinase [Morus notabilis]                                                                 |
| c43741.graph_c0 | 0.07235098    | 0.10863515    | 0.04648694    | 1.34089911     | 1.28192418     | 0.79380433     | 7.563E-07 | 2.82211  | up        | unnamed protein product [Coffea canephora]                                                                 |

| #ID             | 0 h-1<br>FPKM | 0 h-2<br>FPKM | 0 h-3<br>FPKM | 28 h-1<br>FPKM | 28 h-2<br>FPKM | 28 h-3<br>FPKM | FDR       | log2FC   | regulated | nr_annotation                                                                                             |
|-----------------|---------------|---------------|---------------|----------------|----------------|----------------|-----------|----------|-----------|-----------------------------------------------------------------------------------------------------------|
| c43743.graph_c0 | 0.12629723    | 0.06321185    | 0.10819796    | 3.04443787     | 2.55545609     | 2.94612965     | 1.736E-21 | 3.75371  | up        | hypothetical protein MIMGU_mgv1a005562mg [Erythranthe guittata]                                           |
| c43744.graph_c0 | 5.9561807     | 4.83484861    | 4.82390421    | 24.5365971     | 26.506267      | 24.3851684     | 7.396E-27 | 1.18362  | up        | hypothetical protein MIMGU_mgv1a0055216mg [Erythranthe guittata]                                          |
| c43744.graph_c1 | 7.61706708    | 9.36267624    | 6.69342388    | 54.8312242     | 58.5856589     | 58.161059      | 5.096E-51 | 1.76927  | up        | PREDICTED: D-3-phosphoglycerate dehydrogenase 3, chloroplastic [Sesamum indicum]                          |
| c43748.graph_c0 | 15.0342719    | 16.2010606    | 15.2782825    | 6.52264383     | 7.75177536     | 6.50518501     | 9.965E-76 | -2.25362 | down      | PREDICTED: phosphoglucan phosphatase LSF1, chloroplastic [Sesamum indicum]                                |
| c43749.graph_c0 | 0.134143      | 0.13427732    | 0.08618953    | 1.34054741     | 1.25440275     | 1.31265089     | 1.888E-06 | 2.37699  | up        | PREDICTED: cytochrome c oxidase copper chaperone 1 [Sesamum indicum]                                      |
| c43754.graph_c1 | 7.96811394    | 7.65598205    | 6.78056754    | 4.76464918     | 4.28454355     | 3.76147857     | 2.706E-43 | -1.89575 | down      | PREDICTED: folylpolyglutamate synthase [Sesamum indicum]                                                  |
| c43757.graph_c0 | 1.25042338    | 1.51989166    | 1.56858537    | 6.66453702     | 7.67811255     | 6.72713366     | 1.689E-08 | 1.1864   | up        | hypothetical protein M569_12213, partial [Genlisea aurea]                                                 |
| c43758.graph_c0 | 8.37706927    | 9.43363984    | 7.42775731    | 8.18890562     | 8.82310145     | 9.34000789     | 3.951E-12 | -1.02599 | down      | PREDICTED: teruioyl CoA ortho-hydroxylase 1-like [Sesamum indicum]                                        |
| c43759.graph_c0 | 0.84949411    | 1.20838465    | 1.35017836    | 7.76633551     | 9.00739644     | 7.72934369     | 1.63E-21  | 1.74991  | up        | PREDICTED: BTB/POZ domain-containing protein At5g66560 [Sesamum indicum]                                  |
| c43761.graph_c0 | 0.04954292    | 0.17357386    | 0.03183231    | 1.24225909     | 1.08913208     | 1.23403703     | 6.835E-08 | 2.72275  | up        | PREDICTED: probable inactive leucine-rich repeat receptor-like protein kinase At5g20690 [Sesamum indicum] |
| c43763.graph_c0 | 0.69913324    | 0.75815275    | 0.82354606    | 15.79425       | 20.2632313     | 15.6176046     | 6.476E-28 | 3.40842  | up        | PREDICTED: squamosa promoter-binding-like protein 16-like isoform X1 [Solanum tuberosum]                  |
| c43763.graph_c1 | 0.43552266    | 0.43595877    | 0.47971188    | 5.5619784      | 6.45095375     | 5.23960253     | 5.843E-11 | 2.58186  | up        | -                                                                                                         |
| c43768.graph_c0 | 8.77071002    | 7.53841246    | 8.99886501    | 1.48515873     | 1.08482083     | 0.95316199     | 1.164E-74 | -3.93705 | down      | PREDICTED: QWRK motif-containing protein 2 [Sesamum indicum]                                              |
| c43769.graph_c0 | 1.70178386    | 1.3448589     | 0.95914896    | 17.3158538     | 15.2231558     | 15.8293963     | 1.744E-47 | 2.51002  | up        | PREDICTED: telomere repeat-binding protein 4 [Sesamum indicum]                                            |
| c43777.graph_c0 | 4.08575449    | 3.60584034    | 3.47952606    | 30.8722867     | 30.4131781     | 29.0627428     | 1.098E-67 | 1.92673  | up        | PREDICTED: probable sugar phosphate/phosphate translocator At3g14410 [Sesamum indicum]                    |
| c43779.graph_c0 | 1.9627234     | 0.71135283    | 0.65228723    | 0              | 0              | 0              | 2.116E-06 | -Inf     | down      | PREDICTED: 2,3-bisphosphoglycerate-independent phosphoglycerate mutase [Elaeis guineensis]                |
| c43780.graph_c0 | 19.9620858    | 23.3258495    | 23.9970983    | 2.39855438     | 2.64106063     | 3.03127439     | 3.951E-65 | -4.15117 | down      | PREDICTED: mitogen-activated protein kinase 9-like [Sesamum indicum]                                      |
| c43781.graph_c0 | 12.1876941    | 12.3957682    | 10.8841419    | 10.4019914     | 10.73112       | 10.7425492     | 9.668E-30 | -1.24302 | down      | PREDICTED: probable serine/threonine-protein kinase abkC isoform X1 [Sesamum indicum]                     |
| c43782.graph_c0 | 3.64355587    | 3.47887183    | 4.0338209     | 16.4590558     | 18.0980302     | 16.2894133     | 2.437E-09 | 1.09584  | up        | PREDICTED: pentatricopeptide repeat-containing protein At1g06140, mitochondrial-like [Sesamum indicum]    |
| c43783.graph_c0 | 106.392227    | 101.219448    | 109.85987     | 51.0138479     | 49.0944056     | 50.2766253     | 2.05E-104 | -2.16904 | down      | PREDICTED: uncharacterized protein LOC105163767 [Sesamum indicum]                                         |
| c43784.graph_c0 | 8.94943769    | 9.95694687    | 10.2917429    | 7.45727358     | 7.50005767     | 8.29936528     | 2.702E-23 | -1.41982 | down      | PREDICTED: histone-lysine N-methyltransferase ATXR4 [Sesamum indicum]                                     |
| c43789.graph_c2 | 5.64326574    | 5.16472377    | 5.38706622    | 2.57808133     | 3.49164858     | 2.77305027     | 5.509E-08 | -1.96387 | down      | PREDICTED: coiled-coil domain-containing protein 94-like [Sesamum indicum]                                |

| #ID             | 0 h-1<br>FPKM | 0 h-2<br>FPKM | 0 h-3<br>FPKM | 28 h-1<br>FPKM | 28 h-2<br>FPKM | 28 h-3<br>FPKM | FDR       | log2FC   | regulated | nr_annotation                                                                                        |
|-----------------|---------------|---------------|---------------|----------------|----------------|----------------|-----------|----------|-----------|------------------------------------------------------------------------------------------------------|
| c43789.graph_c4 | 3.07860923    | 3.03637299    | 3.49070713    | 0.95423453     | 0.95071372     | 1.18139633     | 9.593E-21 | -2.72923 | down      | PREDICTED: uncharacterized protein LOC105175802 [Sesamum indicum]                                    |
| c43791.graph_c1 | 2.29487247    | 1.08477493    | 1.8840846     | 8.61748375     | 9.16124081     | 8.92206421     | 4.912E-06 | 1.25324  | up        | PREDICTED: uncharacterized protein LOC105165414 [Sesamum indicum]                                    |
| c43796.graph_c0 | 0             | 0             | 0.25520617    | 3.64458031     | 3.68169026     | 3.9750787      | 1.44E-16  | 4.3389   | up        | geranyl diphosphate synthase large subunit [Antirrhinum majus]                                       |
| c43798.graph_c0 | 4.99631328    | 4.80441411    | 4.19604891    | 32.3099182     | 29.8956933     | 30.7976202     | 1.77E-37  | 1.64384  | up        | PREDICTED: methyltransferase-like protein 13 isoform X1 [Sesamum indicum]                            |
| c43799.graph_c0 | 6.27907187    | 2.86538444    | 4.47940165    | 0              | 0              | 0              | 1.035E-21 | -Inf     | down      | hypothetical protein THAPSDRAFT_261727 [Thalassiosira pseudonana CCMP1335]                           |
| c43802.graph_c0 | 23.0745188    | 20.4920997    | 24.2275842    | 173.021725     | 154.88361      | 175.562529     | 9.411E-50 | 1.80153  | up        | PREDICTED: ethylene-responsive transcription factor RAP2-3 [Sesamum indicum]                         |
| c43805.graph_c0 | 15.7888083    | 15.8724494    | 13.1488233    | 12.8542107     | 14.8078428     | 14.5076784     | 2.618E-16 | -1.17567 | down      | PREDICTED: NEP1-interacting protein-like 1 isoform X1 [Sesamum indicum]                              |
| c43808.graph_c0 | 38.483976     | 32.7868766    | 38.1609167    | 36.7993808     | 37.7276807     | 39.6343384     | 9.491E-15 | -1.02957 | down      | PREDICTED: (S)-coclaurine N-methyltransferase isoform X1 [Sesamum indicum]                           |
| c43813.graph_c0 | 2.30854631    | 2.00274357    | 1.87882982    | 1.00670289     | 1.86841433     | 1.14091852     | 4.533E-06 | -1.71404 | down      | -                                                                                                    |
| c43813.graph_c1 | 74.0821308    | 75.3966033    | 70.979846     | 60.4305843     | 60.2120427     | 61.3968592     | 5.473E-64 | -1.3661  | down      | PREDICTED: FACT complex subunit SSRP1 [Sesamum indicum]                                              |
| c43816.graph_c0 | 0             | 0.27364625    | 0.87823623    | 4.76845348     | 5.47153023     | 6.07971734     | 3.208E-08 | 2.70648  | up        | hypothetical protein VITISV_012452 [Vitis vinifera]                                                  |
| c43820.graph_c0 | 14.2792034    | 14.7357513    | 13.1715571    | 6.43490024     | 6.10003732     | 6.57139308     | 2.43E-118 | -2.23185 | down      | PREDICTED: metal tolerance protein 9-like [Sesamum indicum]                                          |
| c43826.graph_c0 | 24.632141     | 24.5708941    | 23.4918044    | 16.0623459     | 15.601062      | 16.0843915     | 1.957E-60 | -1.69624 | down      | PREDICTED: protein REVEILLE 6-like isoform X1 [Sesamum indicum]                                      |
| c43829.graph_c0 | 6.39743516    | 3.75497963    | 3.84890281    | 0              | 0              | 0              | 4.506E-28 | -Inf     | down      | predicted protein, partial [Micromonas sp. RCC299]                                                   |
| c43831.graph_c1 | 1.34132746    | 1.50298947    | 1.56930137    | 18.304258      | 18.4056974     | 15.7078644     | 2.869E-62 | 2.47699  | up        | ABC transporter-like [Arabidopsis thaliana]                                                          |
| c43836.graph_c0 | 9.87198853    | 10.3000378    | 8.81514384    | 9.77960239     | 9.13305642     | 9.20577359     | 2.53E-26  | -1.13292 | down      | hypothetical protein MIMGU_mgv1a020553mg, partial [Erythranthe guttata]                              |
| c43838.graph_c0 | 19.6826702    | 19.8437841    | 18.7882291    | 20.0033957     | 19.5753026     | 20.4556202     | 1.794E-31 | -1.0478  | down      | PREDICTED: uncharacterized protein LOC105159284 [Sesamum indicum]                                    |
| c43840.graph_c0 | 10.5318327    | 10.1948277    | 10.9063766    | 8.63581826     | 8.65807888     | 7.25266891     | 5.828E-27 | -1.45785 | down      | hypothetical protein M569_07122 [Genlisea aurea]                                                     |
| c43843.graph_c0 | 0.27720661    | 0.27748419    | 0.25907016    | 2.61913816     | 2.59635861     | 2.76490307     | 6.227E-10 | 2.20442  | up        | PREDICTED: interactor of constitutive active ROPs 2, chloroplastic-like isoform X2 [Sesamum indicum] |
| c43844.graph_c0 | 51.616544     | 52.0817138    | 46.4681109    | 20.4522781     | 18.6133179     | 17.8729356     | 1.61E-201 | -2.48856 | down      | PREDICTED: uncharacterized protein LOC105180214 [Sesamum indicum]                                    |
| c43851.graph_c0 | 0.41669978    | 0.48663655    | 0.3792953     | 5.27472452     | 5.82219914     | 5.28234398     | 3.521E-30 | 2.58547  | up        | PREDICTED: serine/threonine-protein kinase D6PKL1-like [Sesamum indicum]                             |
| c43851.graph_c1 | 0.68565278    | 0.11438989    | 0             | 4.9832849      | 6.8241492      | 6.09947967     | 3.336E-10 | 3.42201  | up        | PREDICTED: serine/threonine-protein kinase D6PKL1-like [Sesamum indicum]                             |

| #ID             | 0 h-1<br>FPKM | 0 h-2<br>FPKM | 0 h-3<br>FPKM | 28 h-1<br>FPKM | 28 h-2<br>FPKM | 28 h-3<br>FPKM | FDR       | log2FC   | regulated | nr_annotation                                                                           |
|-----------------|---------------|---------------|---------------|----------------|----------------|----------------|-----------|----------|-----------|-----------------------------------------------------------------------------------------|
| c43852.graph_c0 | 4.85052311    | 5.35687484    | 4.76994188    | 29.2784635     | 28.3036913     | 28.1451765     | 1.345E-42 | 1.42686  | up        | PREDICTED: putative 3,4-dihydroxy-2-butanone kinase [Sesamum indicum]                   |
| c43853.graph_c0 | 88.2481205    | 80.8890157    | 85.1622751    | 3.96956853     | 3.92280787     | 4.18282065     | 0         | -5.48644 | down      | PREDICTED: BTB/POZ and TAZ domain-containing protein 1 [Sesamum indicum]                |
| c43854.graph_c0 | 0.73228832    | 0.73302159    | 0.6843778     | 3.53202488     | 4.21571131     | 3.71120172     | 1.52E-05  | 1.32426  | up        | PREDICTED: uncharacterized protein LOC105167611 [Sesamum indicum]                       |
| c43855.graph_c1 | 4.79136477    | 4.8345319     | 5.22121523    | 33.0543362     | 30.4612342     | 29.9159225     | 1.501E-58 | 1.56183  | up        | hypothetical protein MIMGU_mgv1a001401mg [Erythranthe guttata]                          |
| c43856.graph_c0 | 50.840675     | 47.2664303    | 54.5330632    | 5.97285443     | 6.00229788     | 6.69114975     | 3.5E-107  | -4.12282 | down      | PREDICTED: uncharacterized protein LOC105161639 [Sesamum indicum]                       |
| c43864.graph_c0 | 2.5538267     | 2.41894397    | 2.18784561    | 2.11556228     | 2.2885812      | 2.31256584     | 2.246E-07 | -1.18082 | down      | PREDICTED: uncharacterized protein LOC105178718 [Sesamum indicum]                       |
| c43865.graph_c0 | 31.1317159    | 31.8157435    | 31.7920704    | 35.9935958     | 30.4444818     | 33.6509892     | 9.988E-28 | -1.01131 | down      | PREDICTED: chavicol O-methyltransferase-like [Sesamum indicum]                          |
| c43866.graph_c0 | 8.53029009    | 7.73567443    | 8.57405029    | 36.8302911     | 38.7689711     | 35.9386384     | 1.412E-21 | 1.0756   | up        | hypothetical protein MIMGU_mgv1a010682mg [Erythranthe guttata]                          |
| c43867.graph_c0 | 0.40732267    | 0.32618444    | 0.23554159    | 2.7235659      | 2.69969119     | 2.83840093     | 2.157E-10 | 2.00786  | up        | unnamed protein product [Coffea canephora]                                              |
| c43870.graph_c0 | 1.36595579    | 1.8406279     | 1.8903309     | 23.0627828     | 22.6852369     | 20.8442705     | 7.524E-41 | 2.61338  | up        | PREDICTED: nitrogen regulatory protein P-II homolog [Musa acuminata subsp. malaccensis] |
| c43873.graph_c0 | 0             | 0             | 0             | 3.49779475     | 4.28108941     | 3.48843239     | 2.634E-14 | Inf      | up        | hypothetical protein MIMGU_mgv1a024870mg, partial [Erythranthe guttata]                 |
| c43875.graph_c0 | 38.9510379    | 41.6269995    | 36.0781266    | 30.8050861     | 27.5584972     | 29.0637379     | 2.58E-63  | -1.50538 | down      | PREDICTED: uncharacterized protein LOC105157181 [Sesamum indicum]                       |
| c43879.graph_c0 | 66.2147348    | 66.3561874    | 64.1058337    | 64.9844272     | 73.5036679     | 65.4486482     | 3.516E-37 | -1.0382  | down      | PREDICTED: probable 3-hydroxyacyl-CoA dehydrogenase B0272.3 [Sesamum indicum]           |
| c43881.graph_c0 | 0             | 0             | 0             | 5.2022902      | 6.24053952     | 6.00368008     | 1.548E-17 | Inf      | up        | hypothetical protein MIMGU_mgv1a004514mg [Erythranthe guttata]                          |
| c43889.graph_c0 | 18.800262     | 14.1623236    | 18.3042016    | 4.56625966     | 5.06708092     | 5.31883757     | 5.291E-24 | -2.86824 | down      | PREDICTED: uncharacterized protein LOC102584927 isoform X1 [Solanum tuberosum]          |
| c43890.graph_c0 | 28.9198883    | 32.6976188    | 27.3153987    | 161.900268     | 166.637877     | 151.975047     | 3.447E-62 | 1.34394  | up        | PREDICTED: plasma membrane ATPase 3 [Sesamum indicum]                                   |
| c43900.graph_c0 | 0.33211551    | 0.49867211    | 0.42678158    | 2.61494607     | 3.12385225     | 2.85597528     | 7.684E-05 | 1.68024  | up        | PREDICTED: 5'-nucleotidase domain-containing protein 4 [Sesamum indicum]                |
| c43900.graph_c1 | 0.85613143    | 0.73456176    | 1.02157973    | 4.71118054     | 4.53466262     | 4.06188588     | 0.000484  | 1.25481  | up        | PREDICTED: 5'-nucleotidase domain-containing protein 4 [Sesamum indicum]                |
| c43902.graph_c1 | 0             | 0             | 0             | 8.51151567     | 8.82547039     | 9.45460682     | 1.451E-29 | Inf      | up        | PREDICTED: uncharacterized protein LOC105173250 [Sesamum indicum]                       |
| c43902.graph_c4 | 0.79336444    | 0.73533229    | 0.75518868    | 8.11528993     | 7.80940815     | 8.17295483     | 3.256E-23 | 2.30939  | up        | PREDICTED: la-related protein 1A-like [Sesamum indicum]                                 |
| c43903.graph_c0 | 0.66584973    | 0.08331456    | 0.32086623    | 3.38755024     | 4.69719753     | 3.35654476     | 1.483E-06 | 2.33495  | up        | PREDICTED: uncharacterized protein LOC105156092 [Sesamum indicum]                       |

| #ID             | 0 h-1<br>FPKM | 0 h-2<br>FPKM | 0 h-3<br>FPKM | 28 h-1<br>FPKM | 28 h-2<br>FPKM | 28 h-3<br>FPKM | FDR       | log2FC   | regulated | nr_annotation                                                                                                   |
|-----------------|---------------|---------------|---------------|----------------|----------------|----------------|-----------|----------|-----------|-----------------------------------------------------------------------------------------------------------------|
| c43907.graph_c0 | 0.5841318     | 0.45345378    | 0.45957091    | 10.4663        | 10.3184317     | 9.7635046      | 2.44E-101 | 3.26253  | up        | PREDICTED: uncharacterized protein LOC105157864 isoform X2 [Sesamum indicum]                                    |
| c43908.graph_c0 | 0.17455214    | 0.17472692    | 0.22430641    | 80.2411552     | 83.6375495     | 73.1883352     | 0         | 7.59647  | up        | hypothetical protein MIMGU_mgv1a002930mg [Erythranthe nuttallii]                                                |
| c43909.graph_c0 | 23.8778326    | 27.2802181    | 23.3307773    | 12.2931961     | 12.9071078     | 12.9875754     | 2.759E-54 | -2.05366 | down      | PREDICTED: heterogeneous nuclear ribonucleoprotein 1-like [Sesamum indicum]                                     |
| c43909.graph_c3 | 3.64963511    | 2.94444241    | 5.10991894    | 1.46483208     | 1.57282879     | 1.42142715     | 9.309E-06 | -2.48865 | down      | PREDICTED: AP2-like ethylene-responsive transcription factor ANT [Sesamum indicum]                              |
| c43910.graph_c0 | 0.80762656    | 0.73914082    | 0.74130865    | 5.46728387     | 6.49611899     | 5.55604648     | 3.908E-16 | 1.84659  | up        | PREDICTED: tetratricopeptide repeat protein 1A [Sesamum indicum]                                                |
| c43913.graph_c0 | 5.84772385    | 4.99475313    | 4.17797745    | 4.44700745     | 4.26710872     | 4.48568926     | 1.019E-10 | -1.27282 | down      | hypothetical protein MIMGU_mgv1a003864mg [Erythranthe nuttallii]                                                |
| c43917.graph_c1 | 17.828969     | 18.6893759    | 15.585333     | 12.763344      | 12.3777402     | 12.9560826     | 4.066E-45 | -1.5402  | down      | PREDICTED: nicotinate phosphoribosyltransferase-like [Sesamum indicum]                                          |
| c43920.graph_c0 | 73.1107296    | 68.1635414    | 66.642173     | 52.7982475     | 54.220387      | 51.7301905     | 7.22E-69  | -1.47895 | down      | PREDICTED: serine/arginine-rich splicing factor RS31-like [Eucalyptus grandis]                                  |
| c43922.graph_c0 | 3.4797001     | 3.39537312    | 3.30669421    | 15.9604917     | 16.9629448     | 17.2203269     | 2.23E-18  | 1.21031  | up        | PREDICTED: zinc finger CCCH domain-containing protein 33 isoform X4 [Sesamum indicum]                           |
| c43923.graph_c0 | 0.42317762    | 0.21180069    | 1.3595        | 3.69075668     | 4.58205996     | 4.01550308     | 0.0026684 | 1.51265  | up        | -                                                                                                               |
| c43924.graph_c0 | 11.7778451    | 10.3944153    | 10.5676312    | 6.60999483     | 6.15113909     | 6.01366753     | 7.648E-47 | -1.89191 | down      | PREDICTED: uncharacterized vacuolar membrane protein YML018C isoform X2 [Sesamum indicum]                       |
| c43925.graph_c0 | 82.8736261    | 86.0661668    | 79.0938349    | 74.1994861     | 71.7978247     | 70.3821959     | 3.515E-55 | -1.28694 | down      | -                                                                                                               |
| c43929.graph_c0 | 185.05218     | 189.018643    | 198.966735    | 174.04544      | 169.101846     | 179.916458     | 7.749E-40 | -1.22285 | down      | PREDICTED: sucrose synthase 2, partial [Sesamum indicum]                                                        |
| c43936.graph_c0 | 16.1762239    | 17.4801845    | 16.3480193    | 17.4533735     | 18.0569123     | 17.1099526     | 9.835E-28 | -1.0171  | down      | PREDICTED: LMBR1 domain-containing protein 2 homolog A [Sesamum indicum]                                        |
| c43937.graph_c1 | 87.1924424    | 88.2269745    | 83.0064956    | 96.0061926     | 86.5958803     | 88.0943876     | 9.186E-37 | -1.02301 | down      | PREDICTED: protein decapping 5-like isoform X2 [Sesamum indicum]                                                |
| c43939.graph_c0 | 6.74310063    | 6.32236215    | 5.48792914    | 5.89735216     | 5.47225624     | 5.15877562     | 3.212E-22 | -1.25516 | down      | PREDICTED: pentatricopeptide repeat-containing protein At5g02830, chloroplastic [Sesamum indicum]               |
| c43949.graph_c0 | 0.35461754    | 0.26622948    | 0.45569758    | 3.15724134     | 4.30512807     | 2.9443236      | 4.589E-06 | 2.1766   | up        | PREDICTED: probable nucleoside diphosphate kinase 5 [Sesamum indicum]                                           |
| c43951.graph_c0 | 8.55668398    | 8.33718336    | 8.36061883    | 5.37258281     | 6.0968988      | 6.0655117      | 1.256E-37 | -1.61646 | down      | PREDICTED: switch 2 isoform X1 [Sesamum indicum]                                                                |
| c43953.graph_c0 | 1.48204522    | 1.83675052    | 1.99517663    | 0.25646236     | 0.25471762     | 0.25112543     | 1.203E-25 | -3.89526 | down      | PREDICTED: G-type lectin S-receptor-like serine/threonine-protein kinase At5g24080 isoform X1 [Sesamum indicum] |
| c43955.graph_c0 | 1.02749211    | 1.10470773    | 1.36927056    | 6.85926982     | 7.26711194     | 8.57621411     | 3.421E-11 | 1.60347  | up        | PREDICTED: alkylated DNA repair protein alkB homolog 8 isoform X2 [Sesamum indicum]                             |
| c43963.graph_c0 | 1.88259878    | 1.72295673    | 1.58976918    | 91.4389912     | 91.4205066     | 84.2471888     | 1.04E-242 | 4.59511  | up        | PREDICTED: uncharacterized protein LOC105158952 [Sesamum indicum]                                               |
| c43965.graph_c0 | 2.02896774    | 1.09072192    | 1.49678555    | 6.28088283     | 6.85457143     | 7.10835897     | 1.335E-05 | 1.04521  | up        | PREDICTED: calmodulin-lysine N-methyltransferase isoform X2 [Sesamum indicum]                                   |

| #ID             | 0 h-1<br>FPKM | 0 h-2<br>FPKM | 0 h-3<br>FPKM | 28 h-1<br>FPKM | 28 h-2<br>FPKM | 28 h-3<br>FPKM | FDR       | log2FC   | regulated | nr_annotation                                                                              |
|-----------------|---------------|---------------|---------------|----------------|----------------|----------------|-----------|----------|-----------|--------------------------------------------------------------------------------------------|
| c43967.graph_c1 | 67.5156205    | 71.504195     | 74.5881856    | 55.7472058     | 63.7476862     | 60.990249      | 1.725E-31 | -1.33482 | down      | phytosulfokine precursor [Avicennia marina]                                                |
| c43968.graph_c0 | 0.9393793     | 1.27334993    | 0.70416476    | 8.86133736     | 10.2741018     | 7.72985355     | 9.271E-17 | 2.11582  | up        | PREDICTED: probable serine/threonine-protein kinase At1g54610 isoform X2 [Sesamum indicum] |
| c43972.graph_c0 | 105.992448    | 103.077721    | 106.598932    | 447.817691     | 475.100054     | 467.082391     | 8.086E-41 | 1.0479   | up        | hypothetical protein JCGZ_19923 [Jatropha curcas]                                          |
| c43977.graph_c0 | 68.4922666    | 72.6386535    | 66.0114557    | 67.9022291     | 67.4637825     | 62.947567      | 6.607E-47 | -1.15307 | down      | PREDICTED: LOW QUALITY PROTEIN: protein EARLY FLOWERING 3 [Sesamum indicum]                |
| c43979.graph_c1 | 3.72760029    | 3.73133291    | 3.23332692    | 3.38649801     | 2.62961356     | 1.65801283     | 1.707E-06 | -1.56945 | down      | PREDICTED: LOW QUALITY PROTEIN: uncharacterized protein LOC105178099 [Sesamum indicum]     |
| c43983.graph_c0 | 6.17394724    | 5.53711026    | 5.96178996    | 3.76093898     | 4.14518776     | 2.98423631     | 1.137E-23 | -1.79025 | down      | PREDICTED: cryptochrome DASH, chloroplastic/mitochondrial [Sesamum indicum]                |
| c43985.graph_c0 | 21.9929503    | 21.524073     | 21.4993371    | 9.91139338     | 8.98619196     | 9.97808233     | 3.97E-140 | -2.26091 | down      | PREDICTED: uncharacterized protein LOC105162976 [Sesamum indicum]                          |
| c43986.graph_c0 | 0             | 0.33387802    | 0             | 8.12099876     | 7.55138107     | 6.23104666     | 1.16E-12  | 4.95304  | up        | hypothetical protein MIMGU_mgv1a0058 //mg [Erythranthe outtata]                            |
| c43987.graph_c0 | 2.58477753    | 2.82856091    | 2.61782505    | 2.16516773     | 2.02681638     | 2.02657671     | 2.578E-13 | -1.45957 | down      | unnamed protein product [Coffea canephora]                                                 |
| c43988.graph_c0 | 12.5089188    | 13.2398881    | 5.66558692    | 4.6202248      | 1.9512462      | 2.06745539     | 2.64E-05  | -2.94526 | down      | uncharacterized protein UHOR_12387 [Ustilago hordei]                                       |
| c43990.graph_c0 | 29.2198758    | 32.0074033    | 27.9955415    | 22.154736      | 20.2296793     | 20.5804173     | 6.507E-66 | -1.59264 | down      | PREDICTED: ethanolamine-phosphate cytidyltransferase-like [Sesamum indicum]                |
| c43993.graph_c0 | 8.70042327    | 11.3218761    | 14.5345049    | 85.682307      | 82.2161248     | 90.8134838     | 3.923E-13 | 1.80808  | up        | hypothetical protein M569_00228 [Genlisea aurea]                                           |
| c43994.graph_c0 | 3.11305743    | 3.16643557    | 2.70994978    | 16.3487643     | 15.0908969     | 15.2164601     | 1.694E-11 | 1.28699  | up        | hypothetical protein MIMGU_mgv1a014520mg [Erythranthe outtata]                             |
| c43994.graph_c1 | 8.25180505    | 7.66620689    | 8.17816831    | 48.3708994     | 47.4613881     | 51.0170689     | 7.541E-38 | 1.51714  | up        | PREDICTED: heat stress transcription factor A-6b-like [Sesamum indicum]                    |
| c43996.graph_c0 | 3.49028305    | 2.43045429    | 4.192642      | 2.97788588     | 2.98750194     | 3.14990999     | 0.0029665 | -1.2439  | down      | PREDICTED: probable prolyl 4-hydroxylase 9 [Sesamum indicum]                               |
| c43997.graph_c0 | 3.44819432    | 3.09602291    | 2.39009026    | 13.2141282     | 12.8773799     | 14.2157079     | 5.85E-16  | 1.08792  | up        | PREDICTED: histone-lysine N-methyltransferase family member SUVH9 [Sesamum indicum]        |
| c43998.graph_c0 | 7.78864019    | 4.847786      | 5.26098912    | 0              | 0              | 0              | 5.731E-35 | -Inf     | down      | --                                                                                         |
| c43999.graph_c0 | 3.89604689    | 4.39877877    | 4.51173865    | 62.378052      | 64.065929      | 60.3438149     | 9.09E-186 | 2.77407  | up        | hypothetical protein MIMGU_mgv1a001702mg [Erythranthe outtata]                             |
| c44005.graph_c1 | 3.77934887    | 4.42859682    | 3.65972254    | 4.19181275     | 4.33725568     | 3.97286143     | 6.814E-13 | -1.01491 | down      | PREDICTED: putative late blight resistance protein homolog RIB-17 [Sesamum indicum]        |
| c44006.graph_c0 | 0.29301634    | 0.37711254    | 0.26895543    | 3.346555       | 3.57101183     | 3.07831302     | 1.134E-08 | 2.32267  | up        | PREDICTED: uncharacterized protein LOC105178295 isoform X2 [Sesamum indicum]               |
| c44010.graph_c0 | 76.7650805    | 69.464068     | 78.9000209    | 23.8905382     | 22.628949      | 20.3531        | 5.869E-83 | -2.84306 | down      | photosystem II protein I (chloroplast) [Salvia miltiorrhiza]                               |
| c44013.graph_c0 | 2.99082791    | 1.78941131    | 2.95980761    | 0.7995279      | 0.56398338     | 0.93783684     | 2.615E-08 | -2.83974 | down      | PREDICTED: peroxidase 46 [Sesamum indicum]                                                 |
| c44014.graph_c0 | 1.54717674    | 1.8472756     | 1.07793074    | 11.2447914     | 11.7554526     | 12.5363809     | 9.667E-36 | 1.90484  | up        | PREDICTED: uncharacterized protein At1g04910-like isoform X1 [Sesamum indicum]             |

| #ID             | 0 h-1<br>FPKM | 0 h-2<br>FPKM | 0 h-3<br>FPKM | 28 h-1<br>FPKM | 28 h-2<br>FPKM | 28 h-3<br>FPKM | FDR       | log2FC   | regulated | nr_annotation                                                                                     |
|-----------------|---------------|---------------|---------------|----------------|----------------|----------------|-----------|----------|-----------|---------------------------------------------------------------------------------------------------|
| c44015.graph_c0 | 11.1278792    | 9.89407254    | 11.2715797    | 9.22946835     | 10.395203      | 9.4721942      | 4.633E-13 | -1.24173 | down      | PREDICTED: uncharacterized protein LOC105159125 isoform X1 [Sesamum indicum]                      |
| c44025.graph_c0 | 7.9640684     | 9.30071708    | 6.54985165    | 0.07717652     | 0.55746529     | 0.40934017     | 1.422E-49 | -5.59932 | down      | PREDICTED: WAI1-related protein At1g25270-like [Sesamum indicum]                                  |
| c44029.graph_c0 | 4.84019714    | 3.88921889    | 4.06193957    | 3.326381       | 4.01895173     | 4.17884995     | 7.109E-11 | -1.2388  | down      | PREDICTED: vesicle-associated protein 1-4-like [Sesamum indicum]                                  |
| c44030.graph_c0 | 120.681183    | 113.648583    | 119.742543    | 17.0074134     | 16.9422836     | 19.5911221     | 0         | -3.81524 | down      | PREDICTED: RING-H2 finger protein ATL3 [Sesamum indicum]                                          |
| c44032.graph_c1 | 50.561844     | 56.6022477    | 49.2521569    | 11.5272171     | 13.9551815     | 11.9258457     | 8.51E-127 | -3.15432 | down      | PREDICTED: glycosyltransferase family protein 64 protein C5-like [Sesamum indicum]                |
| c44036.graph_c0 | 23.1416118    | 24.3781781    | 20.4270964    | 19.4021371     | 18.7476658     | 17.7109105     | 7.743E-41 | -1.37168 | down      | PREDICTED: glucose-6-phosphate 1-dehydrogenase, chloroplastic-like [Sesamum indicum]              |
| c44039.graph_c1 | 49.4157286    | 52.6289757    | 46.9973109    | 41.7854482     | 48.9875854     | 45.4026073     | 2.142E-44 | -1.2201  | down      | PREDICTED: probable serine/threonine-protein kinase NAK [Sesamum indicum]                         |
| c44041.graph_c0 | 1.96161953    | 1.89428083    | 1.95729503    | 1.77792399     | 1.13582453     | 1.38233884     | 2.586E-10 | -1.52677 | down      | PREDICTED: kinesin-like protein NACK1 [Sesamum indicum]                                           |
| c44043.graph_c0 | 2.31655134    | 2.95656055    | 2.38148815    | 0              | 0.03800459     | 0.03434624     | 1.102E-40 | -7.8137  | down      | PREDICTED: uncharacterized protein LOC105165513 [Sesamum indicum]                                 |
| c44044.graph_c0 | 0.11205158    | 0.44865514    | 0.14399072    | 2.22598413     | 2.6961469      | 2.32585867     | 1.965E-07 | 2.27392  | up        | PREDICTED: scarecrow-like protein 3 isoform X1 [Sesamum indicum]                                  |
| c44050.graph_c2 | 4.75962045    | 4.35172309    | 4.67150527    | 21.8723588     | 22.25724       | 22.4484966     | 2.106E-18 | 1.18169  | up        | PREDICTED: elongation factor 1s, mitochondrial [Sesamum indicum]                                  |
| c44052.graph_c0 | 13.0450051    | 13.3677452    | 8.21602826    | 2.4358389      | 1.92864687     | 1.95704581     | 1.87E-15  | -3.53877 | down      | PREDICTED: ferredoxin--nitrite reductase, chloroplastic [Sesamum indicum]                         |
| c44052.graph_c1 | 5.90335295    | 9.88273507    | 7.19366077    | 1.55346519     | 1.33584135     | 1.32797752     | 1.518E-11 | -3.53751 | down      | PREDICTED: ferredoxin--nitrite reductase, chloroplastic [Sesamum indicum]                         |
| c44054.graph_c0 | 195.776595    | 182.911959    | 221.898007    | 63.5673822     | 65.7527442     | 71.2709812     | 1.457E-33 | -2.67415 | down      | PREDICTED: uncharacterized protein LOC105157696 [Sesamum indicum]                                 |
| c44056.graph_c0 | 71.3816532    | 66.5944965    | 68.839105     | 329.208398     | 350.603354     | 337.558602     | 3.749E-53 | 1.20808  | up        | hypothetical protein Csa_5G600925 [Cucumis sativus]                                               |
| c44062.graph_c0 | 47.6143051    | 50.2536293    | 46.7344556    | 13.583586      | 15.1052314     | 15.1626585     | 1.52E-206 | -2.81136 | down      | PREDICTED: transcription factor E2FB [Sesamum indicum]                                            |
| c44077.graph_c0 | 8.9808397     | 9.55761155    | 9.71851333    | 1.13367549     | 1.24073052     | 1.42965355     | 3.163E-88 | -3.98357 | down      | PREDICTED: PXMP2/4 family protein 4-like [Sesamum indicum]                                        |
| c44077.graph_c1 | 10.5885087    | 10.8000425    | 9.41502994    | 2.51659255     | 2.93086947     | 2.55945843     | 4.703E-64 | -3.03317 | down      | PREDICTED: uncharacterized protein LOC105169472 [Sesamum indicum]                                 |
| c44080.graph_c0 | 0.33077737    | 0.35870098    | 0.24795284    | 7.41255184     | 7.01843691     | 9.18730528     | 7.111E-26 | 3.56956  | up        | PREDICTED: 6-phosphogluconate dehydrogenase, decarboxylating 3-like [Citrus sinensis]             |
| c44081.graph_c0 | 1.10936792    | 1.53169487    | 1.27810773    | 18.6557022     | 19.6559255     | 14.156617      | 1.444E-19 | 2.65007  | up        | PREDICTED: pheophytinase, chloroplastic isoform X1 [Nicotiana sylvestris]                         |
| c44083.graph_c0 | 11.8688864    | 12.0491223    | 11.2383077    | 60.8202183     | 58.5885649     | 56.2972709     | 9.093E-46 | 1.23128  | up        | PREDICTED: translation factor GUF1 homolog, organellar chromatophore isoform X2 [Sesamum indicum] |
| c44084.graph_c1 | 131.224501    | 128.075532    | 145.127529    | 7.17091813     | 5.75782863     | 6.4365517      | 8.49E-164 | -5.47616 | down      | PREDICTED: chaperone protein dnaJ 6 [Sesamum indicum]                                             |
| c44085.graph_c1 | 4.71437121    | 4.63329027    | 4.95667118    | 3.42637783     | 4.27492804     | 4.01592381     | 1.859E-06 | -1.37909 | down      | -                                                                                                 |



| #ID             | 0 h-1<br>FPKM | 0 h-2<br>FPKM | 0 h-3<br>FPKM | 28 h-1<br>FPKM | 28 h-2<br>FPKM | 28 h-3<br>FPKM | FDR       | log2FC   | regulated | nr_annotation                                                                                     |
|-----------------|---------------|---------------|---------------|----------------|----------------|----------------|-----------|----------|-----------|---------------------------------------------------------------------------------------------------|
| c44085.graph_c2 | 8.98922812    | 9.03988794    | 8.98451092    | 7.68269942     | 6.74558678     | 7.4290355      | 1.96E-20  | -1.39584 | down      | PREDICTED: CTD small phosphatase-like protein 2 isoform X3 [Sesamum indicum]                      |
| c44086.graph_c0 | 3.57736257    | 3.20958752    | 3.74574651    | 21.3393126     | 23.1452233     | 23.1016932     | 5E-39     | 1.59046  | up        | PREDICTED: probable apyrase 7 [Sesamum indicum]                                                   |
| c44088.graph_c0 | 0.17429008    | 0.41435344    | 0.16797724    | 2.4542899      | 2.98801727     | 2.7908322      | 4.952E-12 | 2.35634  | up        | hypothetical protein MIMGU_mgv1a001458mg [Erythranthe <small>ontifata</small> ]                   |
| c44089.graph_c1 | 3.62370135    | 3.75241028    | 3.85373768    | 2.76991035     | 2.54196884     | 3.33475706     | 1.927E-07 | -1.4672  | down      | PREDICTED: COBRA-like protein 1 [Sesamum indicum]                                                 |
| c44095.graph_c0 | 2.92365619    | 2.1356152     | 1.69234863    | 9.74389462     | 9.47191974     | 9.49738815     | 1.944E-08 | 1.00414  | up        | hypothetical protein MIMGU_mgv1a003860mg [Erythranthe <small>ontifata</small> ]                   |
| c44100.graph_c0 | 0.49611288    | 0.49660966    | 0.56668861    | 4.84768995     | 5.22106093     | 5.01270163     | 7.649E-22 | 2.18125  | up        | PREDICTED: probable LRR receptor-like serine/threonine-protein kinase At4g36180 [Sesamum indicum] |
| c44101.graph_c0 | 27.3294547    | 27.4973527    | 23.3778749    | 21.3083916     | 20.4755357     | 18.9208461     | 9.64E-47  | -1.45438 | down      | PREDICTED: uncharacterized protein LOC105175040 isoform X2 [Sesamum indicum]                      |
| c44102.graph_c0 | 1.44589862    | 1.8790112     | 1.56466271    | 13.2004119     | 12.2683061     | 12.2908617     | 4.847E-30 | 1.85822  | up        | hypothetical protein MIMGU_mgv1a001745mg [Erythranthe <small>ontifata</small> ]                   |
| c44103.graph_c0 | 1.15224998    | 0.57670189    | 0.74034342    | 7.81618735     | 6.1751238      | 6.94740443     | 3.188E-05 | 1.99828  | up        | hypothetical protein M569_03256, partial [Genlisea aurea]                                         |
| c44103.graph_c1 | 0.35422066    | 0.38412331    | 0.34139068    | 3.79732164     | 4.24219754     | 4.35902417     | 6.829E-14 | 2.43189  | up        | ABC transporter family protein [Hevea brasiliensis]                                               |
| c44105.graph_c0 | 0.19193416    | 0.48031589    | 0.49328599    | 2.78993286     | 2.3301192      | 3.4717577      | 0.0001204 | 1.78492  | up        | PREDICTED: UDP-galactose transporter 2-like [Sesamum indicum]                                     |
| c44106.graph_c0 | 0.20994016    | 0.73552634    | 0.13489071    | 2.16159672     | 2.08948758     | 2.46938338     | 0.0042542 | 1.55439  | up        | PREDICTED: phospholipase D alpha 1 [Sesamum indicum]                                              |
| c44106.graph_c1 | 0.91672586    | 0.30588127    | 0.39267634    | 3.99762641     | 3.2084283      | 2.71835876     | 0.0010401 | 1.53729  | up        | phospholipase D [Plantago major]                                                                  |
| c44106.graph_c2 | 0.35492139    | 0.3806537     | 0.32577717    | 6.48572113     | 5.1739074      | 5.15698111     | 9.479E-25 | 2.89632  | up        | PREDICTED: phospholipase D alpha 1 [Sesamum indicum]                                              |
| c44110.graph_c0 | 0.98344868    | 0.80309045    | 1.06422778    | 4.3638274      | 4.8062756      | 4.54315029     | 1.21E-06  | 1.17377  | up        | PREDICTED: glucan endo-1,3-beta-glucosidase 9 [Sesamum indicum]                                   |
| c44112.graph_c1 | 0.21381639    | 0.21403049    | 0.27476252    | 7.10957374     | 7.89255553     | 7.38642354     | 6.756E-23 | 3.8997   | up        | PREDICTED: 2-hydroxyisoflavanone dehydratase-like [Sesamum indicum]                               |
| c44123.graph_c0 | 3.78015682    | 4.14188254    | 4.39814363    | 21.1623761     | 17.3980103     | 20.7825819     | 1.031E-12 | 1.17629  | up        | PREDICTED: ribonuclease H2 subunit B [Sesamum indicum]                                            |
| c44127.graph_c0 | 32.4685377    | 33.6063247    | 33.2099509    | 21.3639493     | 20.4842302     | 22.2998358     | 1.112E-84 | -1.72057 | down      | PREDICTED: ran-binding protein 9 [Sesamum indicum]                                                |
| c44130.graph_c1 | 8.01032785    | 6.91490646    | 6.73647683    | 7.29957996     | 7.58749936     | 8.07745631     | 5.985E-16 | -1.00401 | down      | PREDICTED: rab3 GTPase-activating protein catalytic subunit [Sesamum indicum]                     |
| c44133.graph_c1 | 119.040684    | 124.472746    | 112.049548    | 15.0993342     | 19.0069859     | 17.1174039     | 0         | -3.88503 | down      | PREDICTED: syntaxin-121 [Sesamum indicum]                                                         |
| c44134.graph_c0 | 2.58891767    | 2.49183662    | 3.58277415    | 11.4344019     | 13.3299705     | 13.5821967     | 9.105E-05 | 1.05114  | up        | PREDICTED: non-specific lipid-transfer protein 5 [Sesamum indicum]                                |
| c44139.graph_c0 | 41.9746165    | 44.0066107    | 42.3337558    | 32.9425083     | 33.5085874     | 37.8622045     | 1.911E-49 | -1.38866 | down      | hypothetical protein F383_14596 [Gossypium arboreum]                                              |
| c44142.graph_c0 | 1.29787847    | 1.85960787    | 0.75215647    | 15.9249647     | 18.4368642     | 15.5603659     | 7.917E-36 | 2.59031  | up        | PREDICTED: probable LRR receptor-like serine/threonine-protein kinase At1g56130 [Sesamum indicum] |
| c44144.graph_c0 | 0.98932602    | 1.01637765    | 0.86985265    | 6.64162616     | 6.09927453     | 5.8209581      | 2.025E-12 | 1.60128  | up        | hypothetical protein MIMGU_mgv1a003454mg [Erythranthe <small>ontifata</small> ]                   |
| c44152.graph_c0 | 78.1455376    | 76.3379313    | 70.460519     | 33.0904282     | 31.8350491     | 32.7277034     | 1.59E-165 | -2.293   | down      | PREDICTED: WD repeat-containing protein 55 homolog [Sesamum indicum]                              |

| #ID             | 0 h-1<br>FPKM | 0 h-2<br>FPKM | 0 h-3<br>FPKM | 28 h-1<br>FPKM | 28 h-2<br>FPKM | 28 h-3<br>FPKM | FDR       | log2FC   | regulated | nr_annotation                                                                                                     |
|-----------------|---------------|---------------|---------------|----------------|----------------|----------------|-----------|----------|-----------|-------------------------------------------------------------------------------------------------------------------|
| c44162.graph_c1 | 0             | 0             | 0             | 1.28415396     | 1.6368997      | 1.64370062     | 1.998E-15 | Inf      | up        | hypothetical protein MIMGU_mgv1a0019072mg, partial [Erythranthe guttata]                                          |
| c44163.graph_c0 | 0.24736507    | 0.30951596    | 0.27813967    | 17.05696       | 16.7197477     | 16.0455172     | 3.155E-93 | 4.80724  | up        | PREDICTED: probable LRR receptor-like serine/threonine-protein kinase At4g30520 [Sesamum indicum]                 |
| c44166.graph_c0 | 90.6443452    | 96.4799792    | 80.9080568    | 34.0177355     | 36.2058327     | 36.2100712     | 3.412E-86 | -2.42126 | down      | PREDICTED: probable ADP-ribosylation factor GTPase-activating protein AGD14 [Sesamum indicum]                     |
| c44169.graph_c0 | 2.06064815    | 0.68757053    | 1.0788207     | 0              | 0              | 0              | 2.508E-08 | -Inf     | down      | PREDICTED: vacuolar-processing enzyme-like [Musa acuminata subsp. malaccensis]                                    |
| c44170.graph_c0 | 0.87792774    | 0.74507538    | 0.68671334    | 39.5743862     | 41.217624      | 38.7666974     | 0         | 4.6059   | up        | PREDICTED: pyruvate, phosphate dikinase, chloroplastic [Populus euphratica]                                       |
| c44173.graph_c0 | 2.84483524    | 3.09411809    | 3.26906259    | 1.2723753      | 0.96933003     | 1.20047408     | 2.589E-27 | -2.51116 | down      | hypothetical protein MIMGU_mgv1a025700mg, partial [Erythranthe guttata]                                           |
| c44178.graph_c0 | 3.00183179    | 2.81703532    | 2.7859525     | 27.9229096     | 29.3156927     | 26.3206621     | 2.255E-86 | 2.18941  | up        | PREDICTED: LOW QUALITY PROTEIN: homeobox-leucine zipper protein ATHB-15 [Sesamum indicum]                         |
| c44178.graph_c1 | 1.11294206    | 0.92838042    | 1.43017461    | 11.5939449     | 15.8849535     | 12.3757383     | 4.581E-14 | 2.42565  | up        | PREDICTED: homeobox-leucine zipper protein ATHB-15-like [Sesamum indicum]                                         |
| c44188.graph_c0 | 54.9997636    | 56.3748336    | 57.1204704    | 48.49933       | 45.7914711     | 47.6725473     | 4.121E-60 | -1.33807 | down      | PREDICTED: uncharacterized protein LOC105157865 [Sesamum indicum]                                                 |
| c44190.graph_c0 | 0.14990815    | 0.18006991    | 0.07705516    | 1.96114281     | 2.34129603     | 2.11592118     | 2.619E-10 | 2.89606  | up        | PREDICTED: DNA replication complex GINS protein PSF1 isoform X2 [Sesamum indicum]                                 |
| c44197.graph_c0 | 1.67694022    | 2.01434331    | 1.58028536    | 20.1506694     | 19.5513912     | 20.0396402     | 1.092E-59 | 2.41326  | up        | PREDICTED: xaxpos;-methylthioadenosine/S-adenosylhomocysteine nucleosidase 1-like isoform X3 [Populus euphratica] |
| c44204.graph_c0 | 14.0562408    | 14.1952004    | 16.0855343    | 10.4577935     | 10.0427912     | 8.8294327      | 1.647E-25 | -1.68915 | down      | PREDICTED: uncharacterized protein At2g39910 [Sesamum indicum]                                                    |
| c44207.graph_c0 | 35.3215556    | 37.9991985    | 35.5103109    | 27.4460862     | 27.336233      | 27.591134      | 3.986E-75 | -1.4922  | down      | PREDICTED: stress response protein NS111-like [Sesamum indicum]                                                   |
| c44208.graph_c1 | 11.0236324    | 11.9504113    | 12.1085297    | 2.49333377     | 3.00166216     | 2.7398472      | 2.453E-83 | -3.18268 | down      | PREDICTED: uncharacterized protein LOC105160931 [Sesamum indicum]                                                 |
| c44209.graph_c0 | 43.2573315    | 43.8281678    | 43.0590596    | 16.086646      | 15.562214      | 14.3506767     | 2.09E-167 | -2.5913  | down      | PREDICTED: probable RNA methyltransferase At5g51130 [Sesamum indicum]                                             |
| c44211.graph_c1 | 0.99313384    | 0.76021577    | 0.90085857    | 5.49844776     | 5.38628481     | 5.40481391     | 1.324E-09 | 1.52765  | up        | PREDICTED: glucose-6-phosphate 1-dehydrogenase 4, chloroplastic [Sesamum indicum]                                 |
| c44213.graph_c0 | 4.06784255    | 1.9434144     | 1.90085045    | 0              | 0              | 0              | 1.993E-10 | -Inf     | down      | PREDICTED: small heat shock protein, chloroplastic-like isoform X2 [Phoenix dactylifera]                          |
| c44215.graph_c0 | 157.672713    | 160.102614    | 147.915422    | 23.635769      | 21.499597      | 24.5606174     | 0         | -3.82939 | down      | PREDICTED: PAX3- and PAX7-binding protein 1 [Sesamum indicum]                                                     |
| c44221.graph_c0 | 4.67099423    | 4.72173726    | 3.81434096    | 29.8178353     | 28.7195702     | 26.6100194     | 9.908E-50 | 1.60033  | up        | PREDICTED: kinesin-like protein KCA2 [Sesamum indicum]                                                            |
| c44223.graph_c0 | 11.8722385    | 12.1755631    | 9.43645589    | 104.602106     | 106.015464     | 106.515618     | 8.18E-132 | 2.15603  | up        | PREDICTED: 14-3-3 protein 7 isoform X1 [Sesamum indicum]                                                          |
| c44225.graph_c0 | 20.3383769    | 18.553534     | 20.8569969    | 13.2890702     | 12.8863658     | 12.9234004     | 1.039E-46 | -1.70298 | down      | unnamed protein product [Coffea canephora]                                                                        |

| #ID             | 0 h-1<br>FPKM | 0 h-2<br>FPKM | 0 h-3<br>FPKM | 28 h-1<br>FPKM | 28 h-2<br>FPKM | 28 h-3<br>FPKM | FDR       | log2FC   | regulated | nr_annotation                                                                           |
|-----------------|---------------|---------------|---------------|----------------|----------------|----------------|-----------|----------|-----------|-----------------------------------------------------------------------------------------|
| c44229.graph_c0 | 1.1655477     | 1.27783052    | 1.2838071     | 10.649425      | 10.4167183     | 11.3560459     | 1.447E-14 | 2.02965  | up        | PREDICTED: uncharacterized protein LOC105172855 [Sesamum indicum]                       |
| c44231.graph_c0 | 121.952411    | 118.257214    | 112.915522    | 120.969953     | 126.220801     | 125.284584     | 6.927E-35 | -1.01262 | down      | unnamed protein product [Coffea canephora]                                              |
| c44232.graph_c0 | 68.9403254    | 69.4893841    | 64.7633131    | 25.9406389     | 24.6657416     | 27.2209677     | 2.31E-197 | -2.4738  | down      | PREDICTED: WEB family protein At5g55860-like [Sesamum indicum]                          |
| c44236.graph_c0 | 3.04913507    | 2.93010079    | 3.13460743    | 25.9135235     | 24.571358      | 27.1247166     | 2.033E-42 | 1.99946  | up        | PREDICTED: actin-depolymerizing factor 5-like [Sesamum indicum]                         |
| c44238.graph_c0 | 3.02738353    | 2.37612085    | 1.85673776    | 58.9576341     | 57.3419712     | 52.2098379     | 1.72E-163 | 3.45133  | up        | hypothetical protein MIMGU_mgv1a008109mg [Erythranthe ontifata]                         |
| c44241.graph_c0 | 4.34738849    | 1.90076076    | 2.37589603    | 0              | 0              | 0              | 6.602E-13 | -Inf     | down      | DNAJ [Theobroma cacao]                                                                  |
| c44242.graph_c0 | 5.65740275    | 7.69823276    | 6.9292059     | 38.1944672     | 37.0093904     | 37.8767111     | 1.788E-31 | 1.38676  | up        | PREDICTED: 50S ribosomal protein L4, chloroplastic [Sesamum indicum]                    |
| c44243.graph_c0 | 18.8366518    | 22.9335668    | 17.9010655    | 86.8224159     | 101.706149     | 87.6292071     | 1.163E-15 | 1.12058  | up        | PREDICTED: alcohol dehydrogenase-like 4 [Sesamum indicum]                               |
| c44249.graph_c0 | 0.59214869    | 0.52688146    | 0.33819312    | 4.44715933     | 3.88583992     | 4.60434186     | 1.112E-06 | 2.06692  | up        | PREDICTED: protein RADIALIS-like 4 [Solanum lycopersicum]                               |
| c44256.graph_c0 | 68.1445947    | 61.3118152    | 62.0497487    | 20.5614315     | 19.9529171     | 18.960724      | 4.46E-239 | -2.77691 | down      | hypothetical protein MIMGU_mgv1a026885mg [Erythranthe ontifata]                         |
| c44260.graph_c0 | 11.134091     | 11.3516334    | 10.3612637    | 49.8624223     | 50.4404297     | 50.2895906     | 1.53E-43  | 1.10727  | up        | PREDICTED: tripeptidyl-peptidase 2 isoform X4 [Sesamum indicum]                         |
| c44261.graph_c0 | 29.4386291    | 31.2518912    | 29.3799264    | 16.254093      | 16.8743868     | 17.1629071     | 4.71E-117 | -1.93095 | down      | PREDICTED: phosphatidylinositol:ceramide inositolphosphotransferase 1 [Sesamum indicum] |
| c44264.graph_c0 | 1.39285728    | 1.32940308    | 1.1238761     | 0.42376213     | 0.51015663     | 0.51867966     | 1.661E-12 | -2.49231 | down      | -                                                                                       |
| c44266.graph_c0 | 81.9136492    | 82.7533336    | 85.7732698    | 35.4720517     | 33.186903      | 36.6757377     | 4.92E-159 | -2.34024 | down      | PREDICTED: interferon-related developmental regulator 1 [Sesamum indicum]               |
| c44271.graph_c0 | 7.30424283    | 7.47915709    | 6.13198567    | 44.2187318     | 45.2267767     | 43.0081045     | 1.873E-65 | 1.57442  | up        | PREDICTED: DNA-directed RNA polymerases IV and V subunit 2-like [Sesamum indicum]       |
| c44271.graph_c2 | 1.7037012     | 2.84234533    | 2.18932349    | 0.23585528     | 0.1597164      | 0.19245598     | 1.947E-15 | -4.60953 | down      | -                                                                                       |
| c44274.graph_c0 | 0.62806356    | 0.05239104    | 0.60531491    | 2.01608898     | 2.3355297      | 2.82462652     | 0.006172  | 1.38798  | up        | PREDICTED: uncharacterized protein LOC105159603 [Sesamum indicum]                       |
| c44287.graph_c0 | 0.93233776    | 0.93327136    | 0.98025622    | 0.49281288     | 0.41715359     | 0.4775309      | 1.174E-07 | -2.12722 | down      | -                                                                                       |
| c44292.graph_c0 | 10.4866312    | 13.452207     | 13.4191156    | 11.496482      | 11.6813903     | 11.0534205     | 3.624E-08 | -1.21934 | down      | hypothetical protein MIMGU_mgv1a00819/mg [Erythranthe ontifata]                         |
| c44293.graph_c0 | 1.66438254    | 1.41251995    | 0.92991194    | 0.23667332     | 0.35615636     | 0.47207966     | 3.944E-10 | -2.99338 | down      | -                                                                                       |
| c44295.graph_c0 | 0             | 0.11657946    | 0             | 13.8817012     | 23.5392279     | 14.3664012     | 3.422E-14 | 7.71176  | up        | hypothetical protein MIMGU_mgv1a006801mg [Erythranthe ontifata]                         |
| c44295.graph_c2 | 0.0675832     | 0.06765088    | 0             | 14.5392485     | 25.2794581     | 15.9922275     | 7.703E-17 | 7.61708  | up        | PREDICTED: spermidine hydroxycinnamoyl transferase-like [Sesamum indicum]               |
| c44297.graph_c0 | 19.1119704    | 17.7689248    | 18.3031484    | 11.516782      | 12.0258322     | 11.2269039     | 6.743E-67 | -1.75687 | down      | PREDICTED: BTB/POZ domain-containing protein At5g48130 [Sesamum indicum]                |
| c44299.graph_c0 | 4.37925802    | 4.64591243    | 5.14653533    | 2.32590655     | 2.25973041     | 2.51946205     | 2.827E-31 | -2.08816 | down      | PREDICTED: DNA polymerase alpha subunit B isoform X1 [Sesamum indicum]                  |
| c44303.graph_c0 | 5251.31481    | 5319.33153    | 4740.25765    | 2581.7455      | 2630.93946     | 3104.19336     | 3.72E-24  | -1.96877 | down      | hypothetical protein MIMGU_mgv1a024110mg [Erythranthe ontifata]                         |

| #ID             | 0 h-1<br>FPKM | 0 h-2<br>FPKM | 0 h-3<br>FPKM | 28 h-1<br>FPKM | 28 h-2<br>FPKM | 28 h-3<br>FPKM | FDR       | log2FC   | regulated | nr_annotation                                                                                 |
|-----------------|---------------|---------------|---------------|----------------|----------------|----------------|-----------|----------|-----------|-----------------------------------------------------------------------------------------------|
| c44309.graph_c0 | 3.24948701    | 1.87032601    | 1.77468077    | 0.05904271     | 0.10662006     | 0.09635674     | 4.511E-12 | -5.80116 | down      | PREDICTED: probable rRNA-processing protein EBP2 homolog [Phoenix dactylifera]                |
| c44315.graph_c0 | 46.691315     | 50.6506636    | 45.0560884    | 42.3308271     | 42.1698241     | 41.5302604     | 5.033E-56 | -1.26607 | down      | PREDICTED: exocyst complex component EXO70B1 [Sesamum indicum]                                |
| c44315.graph_c1 | 32.2840125    | 30.3414526    | 27.2733577    | 30.3943556     | 26.7566817     | 28.4180688     | 8.138E-39 | -1.15962 | down      | PREDICTED: translation initiation factor eIF-2B subunit beta [Sesamum indicum]                |
| c44316.graph_c0 | 0.38917012    | 0.35414529    | 0.18185419    | 1.69707961     | 1.78768773     | 1.55265802     | 0.0020262 | 1.36245  | up        | PREDICTED: uncharacterized protein LOC105169064 [Sesamum indicum]                             |
| c44319.graph_c0 | 53.2209163    | 51.8539499    | 50.493235     | 20.9818353     | 18.2985744     | 20.0746804     | 3.35E-187 | -2.4798  | down      | PREDICTED: F-box-like/WD repeat-containing protein TBL1XR1 [Sesamum indicum]                  |
| c44321.graph_c0 | 8.45361575    | 4.47281412    | 5.27642645    | 0              | 0              | 0              | 3.96E-24  | -Inf     | down      | --                                                                                            |
| c44328.graph_c0 | 5.2166481     | 4.46543241    | 4.60480889    | 21.7209949     | 22.4434475     | 21.396206      | 1.595E-22 | 1.10866  | up        | PREDICTED: actin-related protein 5 [Sesamum indicum]                                          |
| c44329.graph_c0 | 0.67141641    | 1.23805819    | 1.40772088    | 0.02568324     | 0.18551647     | 0.12574389     | 9.142E-08 | -4.39775 | down      | hypothetical protein MIMGU_mgv1a000906mg [Erythranthe                                         |
| c44346.graph_c0 | 30.9508983    | 32.4070009    | 32.3453971    | 33.1733027     | 34.436831      | 30.5140009     | 8.849E-35 | -1.05548 | down      | hypothetical protein MIMGU_mgv1a012155mg [Erythranthe                                         |
| c44347.graph_c0 | 16.3022131    | 17.386762     | 16.2575705    | 9.46031407     | 9.28814545     | 8.93534561     | 1.14E-108 | -1.94188 | down      | hypothetical protein MIMGU_mgv1a000491mg [Erythranthe                                         |
| c44349.graph_c0 | 13.9799296    | 14.1407179    | 13.7562347    | 65.8303019     | 66.8804431     | 69.2552003     | 3.078E-33 | 1.17978  | up        | PREDICTED: proteasome subunit alpha type-6-like [Sesamum indicum]                             |
| c44353.graph_c0 | 19.6075407    | 18.6032991    | 18.2902729    | 11.8314395     | 11.5814364     | 11.1657431     | 3.228E-92 | -1.79838 | down      | PREDICTED: uncharacterized TPR repeat-containing protein At1g05150-like [Sesamum indicum]     |
| c44355.graph_c0 | 0.31372567    | 0.45361306    | 0.5375332     | 5.95369903     | 6.77100883     | 5.27163105     | 7.688E-19 | 2.68825  | up        | PREDICTED: potassium transporter 8-like [Sesamum indicum]                                     |
| c44355.graph_c1 | 0.09680832    | 0.13566737    | 0.14928304    | 4.62967038     | 6.41635237     | 5.40830148     | 5.618E-30 | 4.3341   | up        | PREDICTED: potassium transporter 6-like [Sesamum indicum]                                     |
| c44358.graph_c0 | 16.7876969    | 15.2704858    | 16.1125059    | 16.5045296     | 17.004785      | 17.164944      | 9.042E-22 | -1.01708 | down      | PREDICTED: protein HEADING DATE 5A-like [Sesamum indicum]                                     |
| c44360.graph_c0 | 0.45240108    | 0.37737841    | 0.43601497    | 2.74002079     | 2.99351807     | 2.07932617     | 6.825E-05 | 1.53371  | up        | PREDICTED: probable WRKY transcription factor 30 [Sesamum indicum]                            |
| c44363.graph_c0 | 93.8099031    | 89.480965     | 90.4238108    | 36.3593931     | 36.6871439     | 34.4549838     | 1.09E-189 | -2.43879 | down      | PREDICTED: pentatricopeptide repeat-containing protein At2g17210 isoform X1 [Sesamum indicum] |
| c44363.graph_c1 | 19.1002982    | 20.8752897    | 19.4639706    | 12.263096      | 10.907984      | 11.3275877     | 2.537E-82 | -1.87541 | down      | PREDICTED: uncharacterized protein LOC105157994 [Sesamum indicum]                             |
| c44364.graph_c0 | 52.6839602    | 53.3589774    | 51.5531653    | 45.5031286     | 46.5630666     | 48.0059012     | 1.129E-54 | -1.2601  | down      | PREDICTED: probable pre-mRNA-splicing factor ATP-dependent RNA helicase [Sesamum indicum]     |
| c44366.graph_c0 | 53.6055241    | 58.5797295    | 50.5884348    | 37.7282433     | 37.6245182     | 38.6771912     | 1.141E-62 | -1.60286 | down      | PREDICTED: rac-like GTP-binding protein RAC1 [Sesamum indicum]                                |
| c44371.graph_c0 | 2.16573758    | 1.933538      | 1.88044496    | 10.7843394     | 9.21869571     | 9.94548628     | 7.877E-12 | 1.23547  | up        | -                                                                                             |
| c44373.graph_c0 | 0.43515432    | 0.91473912    | 1.00654295    | 12.9986004     | 13.3356536     | 13.6778064     | 7.598E-36 | 2.98745  | up        | PREDICTED: inositol polyphosphate multikinase alpha [Nicotiana sylvestris]                    |
| c44376.graph_c0 | 8.47384316    | 6.79550175    | 6.99137674    | 3.81421989     | 4.13897858     | 3.85477301     | 1.018E-26 | -2.0035  | down      | hypothetical protein F383_25407 [Gossypium arboreum]                                          |

| #ID             | 0 h-1<br>FPKM | 0 h-2<br>FPKM | 0 h-3<br>FPKM | 28 h-1<br>FPKM | 28 h-2<br>FPKM | 28 h-3<br>FPKM | FDR       | log2FC   | regulated | nr_annotation                                                                                                |
|-----------------|---------------|---------------|---------------|----------------|----------------|----------------|-----------|----------|-----------|--------------------------------------------------------------------------------------------------------------|
| c44380.graph_c0 | 4.22351861    | 4.35064747    | 4.19675981    | 22.2369635     | 21.6731671     | 20.7956002     | 5.052E-27 | 1.25042  | up        | PREDICTED: peptidyl-prolyl cis-trans isomerase FKBP43-like isoform X3 [Sesamum indicum]                      |
| c44384.graph_c0 | 0.29916589    | 0.19964364    | 0.89702671    | 2.53670723     | 2.55216979     | 2.72048256     | 0.0027739 | 1.37612  | up        | -                                                                                                            |
| c44385.graph_c0 | 17.8906258    | 15.8392764    | 15.1657794    | 15.4340002     | 14.6260617     | 16.1381754     | 2.909E-27 | -1.17016 | down      | PREDICTED: uncharacterized protein KIAA0930 homolog [Sesamum indicum]                                        |
| c44385.graph_c1 | 3.22203769    | 2.89056686    | 3.47641221    | 0.53020946     | 0.25931177     | 0.3965927      | 4.987E-50 | -4.10642 | down      | hypothetical protein MIMGU_mgv1a0012/9mg [Erythranthe                                                        |
| c44391.graph_c0 | 0.34419685    | 0.68908303    | 0.32167752    | 89.6938349     | 83.7982475     | 91.0970957     | 0         | 6.52204  | up        | <sup>putative</sup> PREDICTED: raucatriicine-O-beta-D-glucosidase-like [Sesamum indicum]                     |
| c44391.graph_c1 | 10.1422808    | 7.18655639    | 7.76136313    | 8.696538       | 7.85215844     | 7.97489401     | 4.658E-06 | -1.12081 | down      | -                                                                                                            |
| c44394.graph_c0 | 0.63478391    | 0.37248732    | 0.50631049    | 10.2612225     | 8.92018055     | 10.1255776     | 1.161E-53 | 3.18692  | up        | PREDICTED: protein ENHANCED DISEASE RESISTANCE 2 [Sesamum indicum]                                           |
| c44395.graph_c0 | 4.97552992    | 5.53050737    | 5.9230472     | 3.63837167     | 3.52548228     | 3.74730783     | 1.545E-22 | -1.68277 | down      | unnamed protein product [Coffea canephora]                                                                   |
| c44396.graph_c0 | 46.7776308    | 48.8594674    | 50.3395987    | 9.67506987     | 8.00450062     | 8.24256558     | 2.45E-193 | -3.58504 | down      | PREDICTED: uncharacterized protein LOC105156238 [Sesamum indicum]                                            |
| c44409.graph_c0 | 31.0580677    | 30.7784702    | 30.3880838    | 29.6647239     | 27.5482799     | 27.3009731     | 2.595E-49 | -1.2164  | down      | PREDICTED: nuclear poly(A) polymerase 1 isoform X1 [Sesamum indicum]                                         |
| c44411.graph_c0 | 0.59465044    | 0.51021077    | 0.21832839    | 3.08706081     | 2.00687506     | 2.16635411     | 0.0047794 | 1.37601  | up        | PREDICTED: uncharacterized protein LOC105170709 [Sesamum indicum]                                            |
| c44415.graph_c0 | 6.97970619    | 5.46352951    | 5.31350639    | 31.7351161     | 34.3411864     | 30.8393002     | 9.454E-33 | 1.36043  | up        | PREDICTED: serine/threonine-protein kinase CDL1 [Sesamum indicum]                                            |
| c44423.graph_c0 | 8.665834      | 7.59822953    | 6.57845331    | 64.2191107     | 58.3629528     | 60.9583253     | 3.412E-95 | 1.91908  | up        | PREDICTED: cytochrome P450 734A1 [Sesamum indicum]                                                           |
| c44427.graph_c1 | 5.54168326    | 6.25538975    | 4.24246611    | 1.24257702     | 0.92849425     | 1.0488959      | 2.428E-24 | -3.40331 | down      | hypothetical protein MIMGU_mgv1a004986mg [Erythranthe                                                        |
| c44434.graph_c0 | 20.6673665    | 19.0927137    | 19.6435147    | 20.6132897     | 19.8376646     | 19.1070205     | 2.317E-37 | -1.08658 | down      | <sup>putative</sup> PREDICTED: COP9 signalosome complex subunit ba [Sesamum indicum]                         |
| c44435.graph_c0 | 7.31099625    | 8.37849525    | 7.63750147    | 44.5788523     | 40.4259663     | 42.1632056     | 6.989E-60 | 1.35601  | up        | hypothetical protein MIMGU_mgv1a001619mg [Erythranthe                                                        |
| c44436.graph_c0 | 23.0952057    | 24.0459195    | 22.7624878    | 18.9484039     | 18.9914003     | 18.8225318     | 9.474E-61 | -1.39071 | down      | <sup>putative</sup> PREDICTED: LOW QUALITY PROTEIN: U-box domain-containing protein 4-like [Sesamum indicum] |
| c44438.graph_c0 | 4.91872847    | 5.26053541    | 6.2542265     | 33.3218637     | 33.0764833     | 31.458535      | 6.31E-47  | 1.48016  | up        | PREDICTED: prolyl-tRNA synthetase associated domain-containing protein 1 [Sesamum indicum]                   |
| c44443.graph_c0 | 46.5279596    | 49.3392497    | 45.4569863    | 42.1802424     | 40.8731973     | 41.3696795     | 4.037E-52 | -1.27381 | down      | PREDICTED: F-box/FBD/LRR-repeat protein At1g13570-like [Sesamum indicum]                                     |
| c44445.graph_c0 | 0.50015202    | 1.03981745    | 0.7415944     | 3.41137906     | 2.97916674     | 3.60506457     | 0.0017492 | 1.03928  | up        | PREDICTED: KING-H2 zinc finger protein KHA4a [Eucalyptus                                                     |
| c44446.graph_c0 | 1751.22491    | 1783.3599     | 1734.69118    | 419.413553     | 411.576959     | 448.032465     | 5.72E-162 | -3.13255 | down      | <sup>grandis</sup> PREDICTED: REF/SRPP-like protein At5g05500 [Sesamum indicum]                              |
| c44457.graph_c0 | 0.35205536    | 0.48456085    | 0.39585444    | 12.9215262     | 13.6595453     | 11.9531877     | 1.461E-43 | 3.87494  | up        | hypothetical protein MIMGU_mgv1a011349mg [Erythranthe                                                        |
| c44460.graph_c0 | 8.76199046    | 11.8956773    | 8.32663966    | 47.4371031     | 52.6438836     | 42.4733233     | 1.895E-11 | 1.20831  | up        | <sup>putative</sup> PREDICTED: ammonium transporter 1 member 1-like [Sesamum indicum]                        |
| c44463.graph_c1 | 9.39043954    | 8.11804592    | 8.36468502    | 1.31844994     | 1.22544952     | 1.61376658     | 3.039E-67 | -3.72576 | down      | PREDICTED: metalloendoproteinase 1-like [Sesamum indicum]                                                    |
| c44465.graph_c0 | 4.59300877    | 4.27684462    | 3.84329179    | 19.1750828     | 21.7993396     | 19.7325929     | 7.101E-12 | 1.16685  | up        | PREDICTED: tubulin-folding cofactor B isoform X2 [Sesamum indicum]                                           |

| #ID             | 0 h-1<br>FPKM | 0 h-2<br>FPKM | 0 h-3<br>FPKM | 28 h-1<br>FPKM | 28 h-2<br>FPKM | 28 h-3<br>FPKM | FDR       | log2FC   | regulated | nr_annotation                                                                                                |
|-----------------|---------------|---------------|---------------|----------------|----------------|----------------|-----------|----------|-----------|--------------------------------------------------------------------------------------------------------------|
| c44467.graph_c0 | 0.91189746    | 0.58891006    | 0.79381649    | 8.78693895     | 8.35846135     | 8.35635945     | 1.658E-25 | 2.38446  | up        | PREDICTED: probable LRR receptor-like serine/threonine-protein kinase At1g51880 isoform X1 [Sesamum indicum] |
| c44468.graph_c0 | 3.54054424    | 3.44282986    | 3.76978418    | 19.6301997     | 17.1931668     | 20.2775728     | 4.856E-08 | 1.31785  | up        | PREDICTED: transcription factor TCP2-like [Sesamum indicum]                                                  |
| c44471.graph_c0 | 7.38942699    | 6.86303479    | 6.460996      | 1.63332466     | 2.17461518     | 2.57520123     | 3.857E-50 | -2.78592 | down      | PREDICTED: probable WRKY transcription factor 31 [Sesamum indicum]                                           |
| c44480.graph_c0 | 0.55805642    | 0.71096484    | 0.45635201    | 20.7589457     | 15.9135638     | 16.6081702     | 4.579E-32 | 3.86102  | up        | hypothetical protein M569_00618, partial [Genlisea aurea]                                                    |
| c44483.graph_c0 | 48.5004093    | 49.8281828    | 47.936251     | 21.8575408     | 22.3949046     | 21.617785      | 1.32E-162 | -2.24133 | down      | PREDICTED: uncharacterized protein LOC105160446 [Sesamum indicum]                                            |
| c44495.graph_c0 | 29.1235878    | 29.4973458    | 31.4971323    | 24.719685      | 24.8045289     | 25.846724      | 1.549E-33 | -1.34917 | down      | PREDICTED: structural maintenance of chromosomes protein 1A [Sesamum indicum]                                |
| c44496.graph_c0 | 2.49586733    | 2.58921626    | 3.20728834    | 17.7770235     | 16.5274526     | 16.9818677     | 2.347E-18 | 1.53484  | up        | PREDICTED: uncharacterized protein LOC105165753 [Sesamum indicum]                                            |
| c44497.graph_c0 | 14.3968365    | 14.5867619    | 14.3948448    | 6.20166382     | 5.7529325      | 5.01429236     | 4.4E-132  | -2.44534 | down      | PREDICTED: uncharacterized protein LOC105166424 [Sesamum indicum]                                            |
| c44501.graph_c0 | 3.76538453    | 3.50231216    | 2.6548445     | 20.5370574     | 19.5817098     | 19.7322335     | 9.574E-44 | 1.50628  | up        | PREDICTED: calcium-transporting ATPase 3, endoplasmic reticulum-type [Sesamum indicum]                       |
| c44504.graph_c0 | 0.05332012    | 0.10674702    | 0.06851846    | 1.10445348     | 0.85725753     | 0.85379213     | 8.052E-07 | 2.53102  | up        | -                                                                                                            |
| c44505.graph_c0 | 4.36260543    | 3.87721983    | 2.56728892    | 19.1428303     | 22.8761219     | 20.3355274     | 1.935E-14 | 1.44393  | up        | hypothetical protein CICLE_v10012334mg [Citrus clementina]                                                   |
| c44506.graph_c0 | 1.47243791    | 1.2452018     | 1.4027942     | 11.587243      | 12.0115317     | 9.78632515     | 3.324E-28 | 1.92707  | up        | PREDICTED: uncharacterized protein LOC105166535 [Sesamum indicum]                                            |
| c44511.graph_c0 | 0.36177906    | 0.18107066    | 0.17433766    | 1.90630729     | 1.39477909     | 1.26051665     | 0.0008772 | 1.58593  | up        | PREDICTED: uncharacterized protein LOC105162704 [Sesamum indicum]                                            |
| c44513.graph_c0 | 4.57034652    | 6.6336384     | 4.84528789    | 39.071514      | 38.5395276     | 37.4385231     | 3.223E-36 | 1.75142  | up        | PREDICTED: uncharacterized protein LOC105176019 [Sesamum indicum]                                            |
| c44514.graph_c0 | 609.893772    | 607.120252    | 654.001086    | 265.163901     | 262.847381     | 289.97041      | 2.627E-85 | -2.28473 | down      | PREDICTED: alcohol dehydrogenase 1 [Sesamum indicum]                                                         |
| c44519.graph_c0 | 37.7609227    | 39.1440583    | 33.0639288    | 14.0517318     | 13.5693511     | 14.8848011     | 1.449E-97 | -2.45969 | down      | PREDICTED: calmodulin-binding transcription activator 4 [Sesamum indicum]                                    |
| c44531.graph_c0 | 1.72449521    | 1.50701924    | 2.04016807    | 8.59442182     | 9.55624347     | 8.11687271     | 1.392E-11 | 1.223    | up        | Alg9-like mannosyltransferase family isoform 3 [Theobroma cacao]                                             |
| c44533.graph_c0 | 4.79128194    | 3.6333937     | 5.3640417     | 24.8507886     | 23.366891      | 21.2252101     | 3.162E-15 | 1.23884  | up        | unnamed protein product [Coffea canephora]                                                                   |
| c44536.graph_c1 | 5.3411715     | 3.82698265    | 3.46793272    | 23.1281462     | 24.0186192     | 27.708386      | 9.357E-14 | 1.48167  | up        | uncharacterized protein LOC100499956 [Glycine max]                                                           |
| c44537.graph_c0 | 45.0239036    | 45.130078     | 44.9567077    | 47.837178      | 46.9270247     | 45.8662797     | 1.992E-37 | -1.03289 | down      | PREDICTED: probable UDP-N-acetylglucosamine--peptide N-acetylglucosaminyltransferase SEC [Sesamum indicum]   |
| c44546.graph_c0 | 329.500278    | 332.973957    | 392.704109    | 14.646446      | 17.9759801     | 15.779961      | 1.213E-87 | -5.53954 | down      | --                                                                                                           |
| c44547.graph_c0 | 0             | 0             | 0             | 2.46352871     | 3.37020522     | 4.93417466     | 1.471E-07 | Inf      | up        | -                                                                                                            |

| #ID             | 0 h-1<br>FPKM | 0 h-2<br>FPKM | 0 h-3<br>FPKM | 28 h-1<br>FPKM | 28 h-2<br>FPKM | 28 h-3<br>FPKM | FDR       | log2FC   | regulated | nr_annotation                                                                                                |
|-----------------|---------------|---------------|---------------|----------------|----------------|----------------|-----------|----------|-----------|--------------------------------------------------------------------------------------------------------------|
| c44548.graph_c0 | 127.798123    | 118.148303    | 121.648628    | 16.9156945     | 16.1635684     | 17.0214006     | 0         | -3.96515 | down      | PREDICTED: uncharacterized protein LOC102619543 isoform X1 [Citrus sinensis]                                 |
| c44550.graph_c0 | 0.04855391    | 0.12960675    | 0.0831916     | 0.62343376     | 0.94525092     | 1.09422116     | 3.159E-05 | 2.25716  | up        | hypothetical protein MIMGU_mgv1a020534mg, partial [Erythranthe guttata]                                      |
| c44555.graph_c0 | 7.06763217    | 7.67468468    | 6.57896949    | 5.79014795     | 5.67045269     | 5.80591746     | 1.5E-26   | -1.39361 | down      | PREDICTED: protein tesmin/ISO1-like CXC5 [Sesamum indicum]                                                   |
| c44559.graph_c0 | 0.15133577    | 0.23805149    | 0.08334534    | 0.81706832     | 0.99310627     | 1.33344216     | 0.0012468 | 1.65201  | up        | PREDICTED: probable receptor-like protein kinase At5g24010 [Sesamum indicum]                                 |
| c44560.graph_c1 | 0.60215378    | 0.5241363     | 0.40371728    | 5.70837255     | 5.77262022     | 6.11748747     | 2.635E-20 | 2.43836  | up        | PREDICTED: uncharacterized protein LOC102583109 [Solanum tuberosum]                                          |
| c44561.graph_c0 | 2.36033552    | 4.4300607     | 6.82453034    | 92.6358257     | 57.1162783     | 97.6371831     | 2.271E-09 | 3.08291  | up        | BnaCnng13060D [Brassica napus]                                                                               |
| c44563.graph_c0 | 71.2716066    | 72.9695942    | 61.399815     | 13.1157076     | 12.7402451     | 12.7649988     | 2.84E-147 | -3.50125 | down      | PREDICTED: uncharacterized protein LOC105165633 [Sesamum indicum]                                            |
| c44566.graph_c0 | 82.9759821    | 81.9871424    | 73.9550815    | 56.8597465     | 54.1699944     | 54.1813481     | 3.1E-90   | -1.62135 | down      | hypothetical protein MIMGU_mgv1a005950mg [Erythranthe guttata]                                               |
| c44568.graph_c0 | 103.587954    | 104.441589    | 109.834879    | 108.451084     | 116.535566     | 101.359517     | 2.506E-33 | -1.05388 | down      | PREDICTED: probable cyclic nucleotide-gated ion channel 17 [Sesamum indicum]                                 |
| c44568.graph_c1 | 15.5801375    | 10.1466252    | 10.1311558    | 5.59356291     | 6.52864711     | 5.78887039     | 1.224E-07 | -2.08758 | down      | -                                                                                                            |
| c44571.graph_c1 | 0.57240976    | 0.4456534     | 0.57210938    | 3.0970684      | 3.08851965     | 3.20612708     | 0.0004527 | 1.47113  | up        | PREDICTED: probable serine/threonine-protein kinase At1g09600 isoform X2 [Sesamum indicum]                   |
| c44571.graph_c2 | 32.2304616    | 31.0452738    | 26.2766173    | 29.4468845     | 27.9845069     | 34.036501      | 1.745E-16 | -1.05658 | down      | PREDICTED: probable serine/threonine-protein kinase At1g09600 isoform X1 [Sesamum indicum]                   |
| c44572.graph_c0 | 5.6724729     | 3.15452946    | 3.41326812    | 0              | 0              | 0              | 3.124E-26 | -Inf     | down      | --                                                                                                           |
| c44575.graph_c0 | 7.21038567    | 7.62614951    | 6.55587103    | 2.66967174     | 2.83452626     | 2.64235532     | 5.012E-49 | -2.48223 | down      | unknown protein [Arabidopsis thaliana]                                                                       |
| c44583.graph_c0 | 2.41395468    | 1.89519364    | 2.00719416    | 0              | 0.03106083     | 0.02807089     | 6.221E-41 | -7.82607 | down      | actin [Dendrobium catenatum]                                                                                 |
| c44585.graph_c0 | 0.95387859    | 0.65102302    | 1.50435625    | 7.68903295     | 7.48307847     | 7.30274353     | 1.741E-11 | 1.75501  | up        | PREDICTED: methyltransferase-like protein 6 isoform X3 [Sesamum indicum]                                     |
| c44590.graph_c0 | 3.80051416    | 1.9021599     | 2.80819142    | 0.96676713     | 0.93525008     | 0.95791853     | 4.941E-06 | -2.6611  | down      | hypothetical protein MIMGU_mgv1a013990mg [Erythranthe guttata]                                               |
| c44591.graph_c0 | 56.0964009    | 60.1213003    | 52.3803175    | 29.4586209     | 29.5656932     | 30.3924194     | 5.87E-109 | -2.00428 | down      | PREDICTED: uncharacterized protein LOC105165989 [Sesamum indicum]                                            |
| c44592.graph_c0 | 38.7344985    | 39.1203607    | 40.2913114    | 30.276011      | 27.6614457     | 28.0831852     | 1.382E-61 | -1.54893 | down      | PREDICTED: E3 ubiquitin-protein ligase RNF185-like [Sesamum indicum]                                         |
| c44594.graph_c0 | 154.948309    | 150.189297    | 159.134055    | 85.78851       | 80.881915      | 85.451726      | 2.15E-123 | -1.97168 | down      | PREDICTED: uncharacterized protein LOC105169586 [Sesamum indicum]                                            |
| c44595.graph_c0 | 0.15148391    | 0.1010904     | 0.12977522    | 4.44060466     | 6.13015031     | 4.94113246     | 4.317E-19 | 4.25229  | up        | PREDICTED: putative 4-hydroxy-tetrahydrodipicolinate reductase 3, chloroplastic isoform X2 [Sesamum indicum] |
| c44602.graph_c0 | 30.5111821    | 30.7493927    | 28.2782103    | 23.1379842     | 25.5828393     | 25.2306581     | 4.955E-63 | -1.36538 | down      | PREDICTED: uncharacterized protein At1g51745 [Sesamum indicum]                                               |

| #ID             | 0 h-1<br>FPKM | 0 h-2<br>FPKM | 0 h-3<br>FPKM | 28 h-1<br>FPKM | 28 h-2<br>FPKM | 28 h-3<br>FPKM | FDR       | log2FC   | regulated | nr_annotation                                                                                          |
|-----------------|---------------|---------------|---------------|----------------|----------------|----------------|-----------|----------|-----------|--------------------------------------------------------------------------------------------------------|
| c44606.graph_c0 | 0             | 0             | 0.06420405    | 4.28488718     | 4.16393326     | 5.33354179     | 9.839E-23 | 6.61695  | up        | --                                                                                                     |
| c44609.graph_c0 | 21.8897191    | 20.2400288    | 20.8213751    | 18.6975533     | 15.8751329     | 17.3983913     | 1.133E-36 | -1.36644 | down      | PREDICTED: extra-large guanine nucleotide-binding protein 3-like [Sesamum indicum]                     |
| c44609.graph_c1 | 38.9641467    | 34.7739047    | 39.2118148    | 37.3946185     | 32.7164162     | 32.7966628     | 1.132E-26 | -1.22549 | down      | Extra-large GTP-binding protein 3 isoform 2 [Theobroma cacao]                                          |
| c44609.graph_c2 | 47.058659     | 50.3437491    | 47.0909062    | 43.7025072     | 37.3947065     | 38.7618358     | 1.094E-55 | -1.36009 | down      | PREDICTED: extra-large guanine nucleotide-binding protein 3 [Sesamum indicum]                          |
| c44611.graph_c0 | 8.04535954    | 7.93795459    | 9.07870379    | 5.09282792     | 5.58235433     | 5.45543297     | 1.824E-28 | -1.72792 | down      | PREDICTED: MACPF domain-containing protein NSL1 [Sesamum indicum]                                      |
| c44615.graph_c0 | 10.7782511    | 12.0866952    | 10.2569701    | 9.19300489     | 10.0747429     | 10.3899567     | 2.435E-28 | -1.24866 | down      | PREDICTED: pentatricopeptide repeat-containing protein At3g22470, mitochondrial-like [Sesamum indicum] |
| c44618.graph_c1 | 0.89725626    | 0.73485387    | 0.8385526     | 8.73446486     | 9.3316486      | 7.8367522      | 1.532E-26 | 2.29924  | up        | hypothetical protein MIMGU_mgv1a005181mg [Erythranthe guttata]                                         |
| c44622.graph_c0 | 446.771074    | 481.905289    | 406.651674    | 39.0185529     | 38.4278615     | 44.5348281     | 1.82E-215 | -4.54087 | down      | PREDICTED: telomere repeat-binding protein 2-like [Sesamum indicum]                                    |
| c44627.graph_c0 | 7.23527912    | 6.6917173     | 7.34181007    | 4.6288935      | 5.10907867     | 4.63810487     | 1.354E-59 | -1.65637 | down      | PREDICTED: uncharacterized protein LOC105176363 [Sesamum indicum]                                      |
| c44631.graph_c0 | 4.01527079    | 5.80103925    | 5.37255645    | 3.42972605     | 4.21045406     | 2.77407907     | 2.933E-07 | -1.6392  | down      | PREDICTED: WD repeat-containing protein 48-like [Sesamum indicum]                                      |
| c44633.graph_c0 | 3.33840862    | 3.23853141    | 3.04771295    | 14.0989803     | 14.4471348     | 13.3775033     | 1.018E-22 | 1.0332   | up        | PREDICTED: proline-rich receptor-like protein kinase PERK1 isoform X1 [Sesamum indicum]                |
| c44635.graph_c0 | 17.0762981    | 18.2978102    | 15.9671777    | 4.17061903     | 4.6463607      | 3.93837031     | 2.68E-193 | -3.09912 | down      | PREDICTED: uncharacterized protein LOC105175356 [Sesamum indicum]                                      |
| c44641.graph_c0 | 20.7809077    | 21.1100979    | 22.0616297    | 13.5768155     | 11.615337      | 12.5402111     | 1.715E-82 | -1.85239 | down      | PREDICTED: chloroplast envelope membrane protein [Sesamum indicum]                                     |
| c44642.graph_c0 | 23.2092946    | 10.7227086    | 13.4375754    | 0              | 0              | 0              | 7.635E-15 | -Inf     | down      | -                                                                                                      |
| c44646.graph_c1 | 3.70834971    | 3.87345711    | 3.35648237    | 3.18737547     | 3.21647781     | 3.65269573     | 1.823E-09 | -1.20974 | down      | PREDICTED: non-specific lipid-transfer protein-like protein At2g13820 [Sesamum indicum]                |
| c44646.graph_c3 | 82.7252259    | 84.897333     | 78.015323     | 65.2168373     | 68.6027829     | 67.8049915     | 6.771E-63 | -1.37454 | down      | PREDICTED: heat shock 70 kDa protein, mitochondrial [Sesamum indicum]                                  |
| c44656.graph_c0 | 73.4399385    | 72.7223295    | 71.4604       | 28.4226305     | 31.7208422     | 29.9423097     | 3.48E-177 | -2.36279 | down      | PREDICTED: MLO-like protein 10 isoform X1 [Sesamum indicum]                                            |
| c44657.graph_c0 | 140.474524    | 138.727925    | 131.191827    | 142.631816     | 140.564581     | 146.042065     | 6.991E-36 | -1.02475 | down      | PREDICTED: very-long-chain 3-oxoacyl-CoA reductase 1-like [Sesamum indicum]                            |
| c44658.graph_c0 | 62.4680854    | 67.0787825    | 61.4205088    | 44.4236807     | 43.0587342     | 44.4084776     | 3.237E-89 | -1.624   | down      | PREDICTED: serine/threonine-protein kinase CDL1 [Sesamum indicum]                                      |
| c44658.graph_c1 | 0.04040068    | 0.08088227    | 0.05191647    | 3.55292078     | 4.34797118     | 3.80963257     | 2.502E-36 | 4.98772  | up        | PREDICTED: protein LONGIFOLIA 1 [Sesamum indicum]                                                      |
| c44661.graph_c0 | 4.29673155    | 2.88213624    | 2.56150677    | 1.44874008     | 0.98832444     | 0.76183649     | 9.714E-09 | -2.69274 | down      | hypothetical protein MIMGU_mgv1a0244072mg, partial [Erythranthe guttata]                               |
| c44662.graph_c0 | 0.32044688    | 0.48115163    | 0.51473365    | 2.73656258     | 2.20800204     | 2.80314362     | 0.0011748 | 1.46266  | up        | PREDICTED: transcription factor JUNGBRUNNEN 1 [Sesamum indicum]                                        |
| c44663.graph_c0 | 46.4128499    | 47.6857362    | 43.0184339    | 39.4419902     | 40.5073532     | 39.1725755     | 2.437E-53 | -1.29256 | down      | hypothetical protein MIMGU_mgv1a008429mg [Erythranthe guttata]                                         |



| #ID             | 0 h-1<br>FPKM | 0 h-2<br>FPKM | 0 h-3<br>FPKM | 28 h-1<br>FPKM | 28 h-2<br>FPKM | 28 h-3<br>FPKM | FDR       | log2FC   | regulated | nr_annotation                                                                       |
|-----------------|---------------|---------------|---------------|----------------|----------------|----------------|-----------|----------|-----------|-------------------------------------------------------------------------------------|
| c44666.graph_c0 | 14.6297915    | 14.0954958    | 12.7302567    | 65.1856589     | 66.5763801     | 66.6303395     | 2.076E-46 | 1.16993  | up        | PREDICTED: coatomer subunit beta&apos;-2-like isoform X1 [Sesamum indicum]          |
| c44670.graph_c0 | 24.0734273    | 21.8559022    | 26.402925     | 23.4777653     | 20.5736632     | 22.477884      | 4.917E-13 | -1.21255 | down      | PREDICTED: peroxisome biogenesis factor 10 isoform X1 [Sesamum indicum]             |
| c44676.graph_c1 | 2.62481372    | 2.35183626    | 2.57102001    | 13.0070419     | 13.105255      | 12.3444798     | 4.044E-23 | 1.25828  | up        | PREDICTED: zinc-metallopeptidase, peroxisomal isoform X1 [Sesamum indicum]          |
| c44677.graph_c2 | 116.144763    | 116.617148    | 120.451878    | 49.1549377     | 50.8018306     | 49.524413      | 7.75E-174 | -2.33168 | down      | PREDICTED: putative peptidyl-tRNA hydrolase PTRHD1 [Sesamum indicum]                |
| c44677.graph_c3 | 42.1865402    | 43.3901115    | 40.5513753    | 37.0587298     | 36.753321      | 35.4945721     | 1.808E-58 | -1.29663 | down      | PREDICTED: DEAD-box ATP-dependent RNA helicase 37-like [Sesamum indicum]            |
| c44677.graph_c4 | 14.6817979    | 11.8388469    | 14.3746222    | 8.89220511     | 9.51989545     | 9.12178678     | 1.089E-19 | -1.6617  | down      | PREDICTED: purple acid phosphatase 17-like [Sesamum indicum]                        |
| c44680.graph_c0 | 0.25574099    | 0.44799488    | 0.24647797    | 3.39214712     | 2.7271425      | 2.73004703     | 5.631E-06 | 2.13055  | up        | PREDICTED: uncharacterized protein LOC102579233 [Solanum tuberosum]                 |
| c44681.graph_c0 | 66.765262     | 68.2191021    | 64.4953827    | 30.062132      | 30.8813819     | 26.5695863     | 4.87E-149 | -2.27937 | down      | PREDICTED: tubby-like F-box protein 8 [Sesamum indicum]                             |
| c44681.graph_c1 | 39.3070642    | 51.1637803    | 41.8914863    | 23.0105217     | 23.9456164     | 21.5610331     | 1.331E-18 | -2.04094 | down      | unknown [Lotus japonicus]                                                           |
| c44683.graph_c0 | 640.030326    | 738.274837    | 640.229928    | 54.7660068     | 52.753344      | 58.4621759     | 7.6E-166  | -4.6939  | down      | PREDICTED: protein FAR1-RELATED SEQUENCE 5 [Sesamum indicum]                        |
| c44684.graph_c0 | 0             | 0             | 0             | 2.7830699      | 2.72225545     | 3.59569033     | 2.091E-14 | Inf      | up        | -                                                                                   |
| c44686.graph_c0 | 2.00148416    | 1.9331905     | 2.1207607     | 11.0248458     | 11.2217449     | 10.5371971     | 1.151E-12 | 1.34497  | up        | PREDICTED: cytochrome P450 734A1-like [Sesamum indicum]                             |
| c44689.graph_c0 | 3.59108013    | 3.85770113    | 4.61468014    | 27.7548703     | 31.7273972     | 31.6341244     | 1.206E-21 | 1.82349  | up        | PREDICTED: uncharacterized protein LOC105180344 [Sesamum indicum]                   |
| c44691.graph_c0 | 1.36869887    | 1.41900047    | 1.75883224    | 0.07105446     | 0.09623327     | 0.11595972     | 3.536E-25 | -5.09712 | down      | PREDICTED: uncharacterized protein LOC103492548 [Cucumis melo]                      |
| c44694.graph_c0 | 3.84319686    | 2.42221367    | 1.64622004    | 10.6555916     | 12.516641      | 13.4221868     | 0.0014381 | 1.12921  | up        | PREDICTED: crocetin glucosyltransferase, chloroplastic-like [Sesamum indicum]       |
| c44702.graph_c0 | 8.86931675    | 9.59035295    | 9.99560107    | 38.1599375     | 58.5763501     | 45.2305523     | 3.398E-05 | 1.22616  | up        | PREDICTED: hydroxymethylglutaryl-CoA synthase isoform X1 [Sesamum indicum]          |
| c44705.graph_c0 | 2.01307151    | 1.88366856    | 1.68709343    | 8.04698826     | 8.64414408     | 8.1754038      | 6.691E-06 | 1.06631  | up        | PREDICTED: pyridoxal kinase isoform X1 [Sesamum indicum]                            |
| c44710.graph_c0 | 14.711464     | 14.7817658    | 15.908579     | 3.14714024     | 2.73228131     | 3.9179083      | 5.955E-93 | -3.30233 | down      | PREDICTED: uncharacterized protein LOC100244111 [Vitis vinifera]                    |
| c44710.graph_c1 | 13.4005448    | 13.3491617    | 12.7279965    | 4.98734544     | 5.86253334     | 4.99105952     | 4.065E-45 | -2.4078  | down      | PREDICTED: dehydration-responsive element-binding protein 1D-like [Sesamum indicum] |
| c44711.graph_c0 | 32.1643932    | 32.7140464    | 31.3315253    | 12.3146147     | 13.2485026     | 12.0413184     | 1.65E-159 | -2.44579 | down      | PREDICTED: gamma-glutamyltranspeptidase 3 [Sesamum indicum]                         |
| c44714.graph_c0 | 4.70995938    | 5.04360655    | 4.081908      | 25.9524152     | 23.7919933     | 23.9052787     | 4.759E-09 | 1.32369  | up        | hypothetical protein MIMGU_mgv1a014633mg [Erythranthe outtata]                      |
| c44715.graph_c0 | 6.48985561    | 6.67075299    | 7.16432442    | 0.53815721     | 0.4859055      | 0.6199509      | 1.473E-84 | -4.71873 | down      | PREDICTED: uncharacterized membrane protein At1g06890 isoform X2 [Sesamum indicum]  |

| #ID             | 0 h-1<br>FPKM | 0 h-2<br>FPKM | 0 h-3<br>FPKM | 28 h-1<br>FPKM | 28 h-2<br>FPKM | 28 h-3<br>FPKM | FDR       | log2FC   | regulated | nr_annotation                                                                                   |
|-----------------|---------------|---------------|---------------|----------------|----------------|----------------|-----------|----------|-----------|-------------------------------------------------------------------------------------------------|
| c44722.graph_c0 | 7.45885883    | 8.15711004    | 7.33964044    | 5.7732108      | 6.64831971     | 6.30441115     | 1.793E-40 | -1.38394 | down      | PREDICTED: protein NRT1/ PTR FAMILY 5.5-like isoform X2 [Sesamum indicum]                       |
| c44724.graph_c0 | 73.364664     | 73.0149469    | 72.4625209    | 57.315364      | 57.9604479     | 56.7976574     | 7.143E-70 | -1.43734 | down      | PREDICTED: cytochrome P450 78A3-like [Sesamum indicum]                                          |
| c44725.graph_c0 | 1.78859779    | 1.15096423    | 1.64172784    | 16.0171495     | 15.3422789     | 16.0247888     | 5.959E-21 | 2.28023  | up        | hypothetical protein MIMGU_mgv1a0066 / mg [Erythranthe diffusa]                                 |
| c44728.graph_c0 | 67.008013     | 63.5359012    | 65.2806575    | 321.398068     | 316.69831      | 327.462089     | 3.793E-52 | 1.21159  | up        | PREDICTED: ruBisCO large subunit-binding protein subunit beta, chloroplastic [Sesamum indicum]  |
| c44735.graph_c0 | 2.99180356    | 1.68754569    | 2.13588113    | 0              | 0              | 0              | 5.15E-36  | -Inf     | down      | hypothetical protein SELMODRAFT_444263 [Selaginella moellendorffii]                             |
| c44740.graph_c0 | 5.70418914    | 5.00137315    | 6.74155999    | 39.4907459     | 33.7711578     | 33.6069239     | 2.172E-21 | 1.52123  | up        | PREDICTED: transcription factor TGA1-like [Sesamum indicum]                                     |
| c44741.graph_c0 | 6.68674714    | 6.65646256    | 5.83926178    | 28.1121773     | 31.7101429     | 30.7610192     | 3.588E-22 | 1.1507   | up        | PREDICTED: aspartate-semialdehyde dehydrogenase [Sesamum indicum]                               |
| c44742.graph_c0 | 10.7137706    | 11.3754077    | 11.579125     | 9.45207174     | 9.87544428     | 10.8163025     | 8.404E-26 | -1.25042 | down      | PREDICTED: probable zinc metallopeptidase EGY3, chloroplastic [Sesamum indicum]                 |
| c44743.graph_c0 | 28.4500503    | 27.1378741    | 26.1604722    | 11.3633111     | 11.1389048     | 11.7388694     | 9.56E-172 | -2.34481 | down      | PREDICTED: COBRA-like protein 7 [Sesamum indicum]                                               |
| c44744.graph_c0 | 3.37918669    | 3.28308307    | 4.34238868    | 0.65011061     | 0.71743091     | 0.67784188     | 1.559E-21 | -3.52194 | down      | PREDICTED: serine/threonine-protein kinase Nek2 [Sesamum indicum]                               |
| c44747.graph_c0 | 2.83974747    | 2.43650661    | 2.22243776    | 131.004104     | 136.261078     | 115.964753     | 1.06E-189 | 4.58701  | up        | PREDICTED: endoplasmic reticulum chaperone protein [Sesamum indicum]                            |
| c44753.graph_c0 | 0             | 0             | 0             | 5.76830795     | 7.13721949     | 13.5279568     | 1.207E-08 | Inf      | up        | apocytochrome b [Chara vulgaris]                                                                |
| c44762.graph_c1 | 2.42039588    | 2.4810604     | 3.05049099    | 26.8013571     | 26.4899721     | 26.1483906     | 8.12E-124 | 2.22674  | up        | PREDICTED: LOW QUALITY PROTEIN: cullin-associated NEDD8-dissociated protein 1 [Sesamum indicum] |
| c44762.graph_c2 | 63.0526965    | 55.3339584    | 60.2053126    | 50.0014582     | 46.681614      | 41.4331937     | 2.301E-42 | -1.46173 | down      | PREDICTED: zeatin O-glucosyltransferase-like [Sesamum indicum]                                  |
| c44762.graph_c4 | 165.397321    | 146.537528    | 173.860517    | 75.3327334     | 73.1888906     | 78.2356849     | 1.866E-36 | -2.19051 | down      | PREDICTED: uncharacterized protein LOC105162036 [Sesamum indicum]                               |
| c44762.graph_c5 | 0             | 0             | 0             | 22.7424718     | 20.5343197     | 20.6519539     | 1.267E-50 | Inf      | up        | unnamed protein product [Coffea canephora]                                                      |
| c44762.graph_c6 | 5.31181574    | 4.9787716     | 5.58482198    | 25.8660003     | 23.8932811     | 22.9679361     | 1.803E-14 | 1.10397  | up        | PREDICTED: UPF0496 protein At1g20180-like isoform X2 [Nicotiana glauca]                         |
| c44767.graph_c0 | 0.9973398     | 0.51996796    | 0.77431277    | 32.6942432     | 37.4008825     | 29.8820882     | 6.28E-80  | 4.3578   | up        | PREDICTED: putative E3 ubiquitin-protein ligase XBAT31 [Sesamum indicum]                        |
| c44770.graph_c0 | 2.96117197    | 3.02892701    | 2.76554474    | 25.9200362     | 24.8050158     | 24.4805001     | 8.015E-84 | 2.01284  | up        | PREDICTED: SNF2 domain-containing protein CLASSY 3-like [Sesamum indicum]                       |
| c44773.graph_c0 | 12.3859457    | 12.6237729    | 13.0225341    | 13.3230103     | 11.7486439     | 12.0066945     | 2.138E-29 | -1.1279  | down      | PREDICTED: zinc finger CCCH domain-containing protein 5 [Sesamum indicum]                       |
| c44775.graph_c0 | 3.92970027    | 2.89846809    | 2.74639356    | 16.3347934     | 17.825221      | 18.3172331     | 1.541E-10 | 1.36814  | up        | hypothetical protein MIMGU_mgv1a01559 / mg [Erythranthe diffusa]                                |
| c44781.graph_c0 | 1.06605236    | 1.3042576     | 1.48407945    | 13.6451014     | 13.6416618     | 14.0671409     | 4.383E-39 | 2.32924  | up        | PREDICTED: protein S-acyltransferase 21 [Sesamum indicum]                                       |
| c44781.graph_c1 | 1.50655171    | 0.94253768    | 1.20998662    | 14.7818669     | 12.4815798     | 15.7474579     | 3.58E-09  | 2.46735  | up        | -                                                                                               |
| c44785.graph_c0 | 59.8466496    | 56.3426245    | 61.1143862    | 26.7033064     | 27.6720038     | 29.4879182     | 1.35E-104 | -2.17076 | down      | PREDICTED: phytohemagglutinin receptor 2-like [Sesamum indicum]                                 |
| c44796.graph_c0 | 23.0028605    | 22.5559782    | 20.4730299    | 13.7542519     | 14.2864333     | 14.2858547     | 2.495E-74 | -1.73061 | down      | PREDICTED: AMP deaminase-like [Sesamum indicum]                                                 |

| #ID             | 0 h-1<br>FPKM | 0 h-2<br>FPKM | 0 h-3<br>FPKM | 28 h-1<br>FPKM | 28 h-2<br>FPKM | 28 h-3<br>FPKM | FDR       | log2FC   | regulated | nr_annotation                                                                                              |
|-----------------|---------------|---------------|---------------|----------------|----------------|----------------|-----------|----------|-----------|------------------------------------------------------------------------------------------------------------|
| c44797.graph_c0 | 0             | 0             | 0.05621366    | 0.85842147     | 1.03343214     | 0.95989636     | 1.177E-09 | 4.53451  | up        | hypothetical protein MIMGU_mgv1a000411mg [Erythranthe<br>cuffata]                                          |
| c44797.graph_c1 | 84.3931498    | 82.4960087    | 75.5298408    | 77.0050918     | 70.2298975     | 71.5118067     | 4.477E-53 | -1.23745 | down      | PREDICTED: uncharacterized protein LOC105172555 [Sesamum<br>indicum]                                       |
| c44802.graph_c0 | 77.6366872    | 74.9863793    | 74.1287236    | 5.67560213     | 5.42260806     | 6.29932204     | 0         | -4.79353 | down      | PREDICTED: adagio protein 3 isoform X1 [Sesamum indicum]                                                   |
| c44803.graph_c0 | 15.1091255    | 16.79711      | 15.3847965    | 15.8496017     | 14.1399107     | 14.6147795     | 1.036E-38 | -1.17487 | down      | PREDICTED: ribosome biogenesis protein BMS1 homolog<br>[Sesamum indicum]                                   |
| c44812.graph_c0 | 5.76585752    | 5.14920034    | 4.06788128    | 28.6904911     | 28.625139      | 28.6298381     | 7.778E-47 | 1.43374  | up        | PREDICTED: pyrophosphate-energized membrane proton pump 3<br>[Sesamum indicum]                             |
| c44815.graph_c0 | 16.7146686    | 17.0005437    | 16.929837     | 3.76711287     | 4.53840035     | 4.23440962     | 4.72E-237 | -3.10464 | down      | PREDICTED: LOW QUALITY PROTEIN: leucine-rich repeat<br>receptor-like protein kinase PXL2 [Sesamum indicum] |
| c44820.graph_c0 | 71.7394847    | 67.3604614    | 60.3653355    | 54.8627856     | 52.77801       | 52.8982673     | 5.646E-56 | -1.40171 | down      | PREDICTED: protein TIME FOR COFFEE [Sesamum indicum]                                                       |
| c44826.graph_c0 | 2.38916166    | 1.73931203    | 2.58173162    | 0.55250011     | 0.71265114     | 1.03048133     | 1.15E-11  | -2.63772 | down      | PREDICTED: uncharacterized protein LOC105177426 isoform X1<br>[Sesamum indicum]                            |
| c44832.graph_c0 | 1.17168327    | 1.33843628    | 1.09824567    | 1.1621462      | 0.63320374     | 0.9973519      | 3.808E-10 | -1.45798 | down      | Ty3/gypsy retrotransposon protein [Beta vulgaris subsp. vulgaris]                                          |
| c44833.graph_c0 | 1.36357558    | 1.81992133    | 1.66238971    | 8.23324603     | 7.81242488     | 7.95201634     | 2.364E-15 | 1.21588  | up        | PREDICTED: putative receptor-like protein kinase At5g39000<br>isoform X1 [Sesamum indicum]                 |
| c44846.graph_c0 | 1.96276064    | 2.10848649    | 2.24539554    | 10.6989234     | 11.2779993     | 10.4904765     | 2.747E-16 | 1.26935  | up        | PREDICTED: uncharacterized protein LOC105173505 [Sesamum<br>indicum]                                       |
| c44848.graph_c0 | 2.93735929    | 3.09781672    | 3.16798715    | 70.945833      | 67.6027959     | 61.8885454     | 2.07E-161 | 3.35299  | up        | PREDICTED: L-type lectin-domain containing receptor kinase S.4-<br>like [Sesamum indicum]                  |
| c44849.graph_c0 | 111.012853    | 111.252483    | 134.409905    | 7.13559294     | 7.57973106     | 8.18206469     | 2.968E-64 | -5.05407 | down      | hypothetical protein MIMGU_mgv1a011926mg [Erythranthe<br>cuffata]                                          |
| c44852.graph_c0 | 6.84805344    | 3.05580358    | 4.02892472    | 0              | 0              | 0              | 4.751E-14 | -Inf     | down      | Ribosomal protein L7 eukaryotic [Macrophomina phaseolina MS6]                                              |
| c44854.graph_c0 | 0.12921769    | 0.19402063    | 0.16604985    | 1.62002812     | 1.54752965     | 1.49435534     | 2.626E-06 | 2.15953  | up        | PREDICTED: GDSL esterase/lipase At4g18970-like [Sesamum<br>indicum]                                        |
| c44858.graph_c0 | 60.6791425    | 64.8343482    | 61.9891189    | 29.5810063     | 29.7701914     | 27.2252602     | 5.07E-152 | -2.20591 | down      | PREDICTED: F-box protein SKIP22-like [Sesamum indicum]                                                     |
| c44859.graph_c0 | 0.43534477    | 0.34862456    | 0.11188705    | 3.2779669      | 3.4853572      | 3.50098549     | 1.972E-17 | 2.4415   | up        | PREDICTED: DNA topoisomerase 2-binding protein 1-A isoform<br>X1 [Sesamum indicum]                         |
| c44861.graph_c0 | 80.2069051    | 78.9718656    | 71.2455868    | 31.3141548     | 33.2320156     | 31.9663448     | 4.41E-180 | -2.34464 | down      | PREDICTED: scopoletin glucosyltransferase-like [Sesamum<br>indicum]                                        |
| c44864.graph_c0 | 38.759963     | 38.7213326    | 37.5797543    | 29.0139464     | 27.4153325     | 25.5792488     | 9.91E-71  | -1.5791  | down      | PREDICTED: UPF0183 protein At3g51130 isoform X1 [Sesamum<br>indicum]                                       |
| c44866.graph_c0 | 8.02596963    | 7.93892942    | 7.75052348    | 5.48806702     | 4.3942428      | 3.83042535     | 4.583E-26 | -1.88138 | down      | PREDICTED: transcription repressor UPF13-like [Sesamum<br>indicum]                                         |
| c44868.graph_c1 | 5.71177044    | 4.84800988    | 5.41187181    | 30.7615723     | 31.5575797     | 31.0798961     | 6.584E-43 | 1.45758  | up        | PREDICTED: mitochondrial inner membrane protein OXA1-like<br>[Sesamum indicum]                             |
| c44868.graph_c2 | 0.14868058    | 0.22324419    | 0.12737362    | 1.96309339     | 2.61808049     | 2.2631899      | 2.939E-11 | 2.68911  | up        | PREDICTED: uncharacterized protein LOC105178110 [Sesamum<br>indicum]                                       |
| c44869.graph_c0 | 3.84943796    | 3.42350226    | 3.08216227    | 19.3475126     | 18.7028952     | 17.5435205     | 1.448E-37 | 1.3363   | up        | PREDICTED: kinesin-like protein KIF3A [Sesamum indicum]                                                    |

| #ID             | 0 h-1<br>FPKM | 0 h-2<br>FPKM | 0 h-3<br>FPKM | 28 h-1<br>FPKM | 28 h-2<br>FPKM | 28 h-3<br>FPKM | FDR       | log2FC   | regulated | nr_annotation                                                                                     |
|-----------------|---------------|---------------|---------------|----------------|----------------|----------------|-----------|----------|-----------|---------------------------------------------------------------------------------------------------|
| c44871.graph_c0 | 0.91417554    | 0.84972731    | 0.75519757    | 13.6561529     | 11.6231927     | 11.1917163     | 2.144E-44 | 2.76711  | up        | PREDICTED: synaptotagmin-2-like [Sesamum indicum]                                                 |
| c44877.graph_c0 | 13.1432057    | 11.7605445    | 14.2207637    | 11.9458985     | 11.9736573     | 12.0879208     | 4.373E-14 | -1.2117  | down      | PREDICTED: vinorine synthase-like [Sesamum indicum]                                               |
| c44878.graph_c1 | 6.7836841     | 6.72641583    | 8.01827366    | 35.0472932     | 32.9673119     | 36.7394284     | 2.086E-25 | 1.19025  | up        | Taxane 13-alpha-hydroxylase [Medicago truncatula]                                                 |
| c44881.graph_c0 | 5.48615953    | 4.24949346    | 3.44103834    | 0              | 0.04285912     | 0.07746694     | 5.166E-35 | -7.8543  | down      | PREDICTED: xylosyltransferase 2-like [Sesamum indicum]                                            |
| c44881.graph_c1 | 32.9856868    | 30.6118085    | 26.6338841    | 18.6572339     | 19.668171      | 16.6702439     | 2.941E-43 | -1.80297 | down      | PREDICTED: protein SPA1-RELATED 3-like isoform X1 [Solanum tuberosum]                             |
| c44882.graph_c0 | 0.51901797    | 0.17317923    | 0.62249473    | 10.6878792     | 10.9898211     | 10.0140151     | 4.603E-42 | 3.49488  | up        | PREDICTED: uncharacterized protein LOC105178220 [Sesamum indicum]                                 |
| c44892.graph_c0 | 0.04949118    | 0             | 0.25439251    | 3.09341183     | 2.63067359     | 2.75900798     | 1.893E-19 | 3.68417  | up        | PREDICTED: uncharacterized protein LOC105176998 [Sesamum indicum]                                 |
| c44894.graph_c0 | 6.37475982    | 4.44746343    | 4.22002784    | 0              | 0              | 0              | 3.366E-35 | -Inf     | down      | unknown [Lotus japonicus]                                                                         |
| c44899.graph_c0 | 2.51658082    | 2.04327064    | 1.97627588    | 16.2174564     | 15.5419645     | 15.0740358     | 1.303E-30 | 1.75295  | up        | PREDICTED: uncharacterized protein LOC105166230 isoform X2 [Sesamum indicum]                      |
| c44900.graph_c1 | 31.8178694    | 33.2519196    | 30.4886242    | 32.169627      | 32.09112       | 32.4436759     | 7.564E-41 | -1.07261 | down      | PREDICTED: cell division cycle and apoptosis regulator protein 1 isoform X2 [Sesamum indicum]     |
| c44901.graph_c0 | 1.75540613    | 3.5593833     | 2.42928687    | 17.3380539     | 19.7898242     | 15.4557063     | 1.966E-11 | 1.67049  | up        | unnamed protein product [Coffea canephora]                                                        |
| c44904.graph_c0 | 0             | 0.08000995    | 0             | 5.22833368     | 5.97954713     | 5.38025006     | 7.126E-31 | 6.61377  | up        | PREDICTED: uncharacterized protein LOC105161004 [Sesamum indicum]                                 |
| c44905.graph_c0 | 1.7191845     | 2.20927121    | 1.46286199    | 9.0841546      | 9.01015738     | 8.69395549     | 1.197E-12 | 1.22488  | up        | PREDICTED: uncharacterized protein LOC105163513 isoform X1 [Sesamum indicum]                      |
| c44906.graph_c0 | 16.1707019    | 17.6508254    | 15.5178752    | 13.0890055     | 12.2842897     | 12.662985      | 4.915E-37 | -1.46507 | down      | PREDICTED: pentatricopeptide repeat-containing protein At1g66345, mitochondrial [Sesamum indicum] |
| c44907.graph_c0 | 6.86643477    | 6.4578906     | 6.10867422    | 6.85506211     | 5.8923834      | 6.42153856     | 8.216E-12 | -1.10873 | down      | hypothetical protein MIMGU_mgv1a005181mg [Erythranthe guttata]                                    |
| c44908.graph_c0 | 38.1384558    | 37.1558797    | 36.3311852    | 22.1139034     | 21.673201      | 21.0534853     | 2.69E-117 | -1.87384 | down      | hypothetical protein MIMGU_mgv1a00160/mg [Erythranthe guttata]                                    |
| c44911.graph_c0 | 5.97639451    | 6.93008256    | 4.67637692    | 27.6958837     | 31.3361436     | 26.8458158     | 7.42E-15  | 1.20046  | up        | PREDICTED: amino-acid permease BAI1 homolog [Sesamum indicum]                                     |
| c44912.graph_c0 | 1.84846455    | 2.20614541    | 1.73583278    | 9.81754392     | 14.4161863     | 10.1613663     | 1.243E-05 | 1.48005  | up        | PREDICTED: uncharacterized protein LOC105178220 [Sesamum indicum]                                 |
| c44917.graph_c0 | 10.4436366    | 10.5841608    | 9.05830657    | 6.26825669     | 6.62956895     | 6.11662408     | 1.27E-68  | -1.75096 | down      | PREDICTED: serine/threonine-protein kinase CTR1-like [Sesamum indicum]                            |
| c44919.graph_c0 | 84.2917399    | 83.6764122    | 80.546239     | 19.1648964     | 19.7506349     | 21.2350573     | 0         | -3.13625 | down      | PREDICTED: tubby-like F-box protein 6 [Sesamum indicum]                                           |
| c44920.graph_c0 | 5.49603322    | 5.87362127    | 5.2201976     | 46.9303777     | 45.8061425     | 45.128664      | 3.037E-86 | 1.9651   | up        | PREDICTED: molybdate-anion transporter-like [Sesamum indicum]                                     |
| c44922.graph_c0 | 24.7942644    | 24.8613734    | 24.5339836    | 16.1783869     | 15.6331452     | 15.3557449     | 1.344E-64 | -1.74397 | down      | PREDICTED: transcription factor IIIA-like isoform X2 [Sesamum indicum]                            |
| c44927.graph_c0 | 19.9533199    | 19.9733001    | 18.8580677    | 128.07641      | 130.361796     | 125.804824     | 2.505E-81 | 1.61856  | up        | PREDICTED: S-adenosylmethionine synthase 1 [Sesamum indicum]                                      |

| #ID             | 0 h-1<br>FPKM | 0 h-2<br>FPKM | 0 h-3<br>FPKM | 28 h-1<br>FPKM | 28 h-2<br>FPKM | 28 h-3<br>FPKM | FDR       | log2FC   | regulated | nr_annotation                                                                                             |
|-----------------|---------------|---------------|---------------|----------------|----------------|----------------|-----------|----------|-----------|-----------------------------------------------------------------------------------------------------------|
| c44928.graph_c0 | 3.06764635    | 3.20821298    | 2.05927829    | 13.2441788     | 12.4389854     | 11.9204403     | 8.004E-08 | 1.08777  | up        | hypothetical protein MIMGU_mgv1a008719mg [Erythranthe outtata]                                            |
| c44935.graph_c0 | 2.50390849    | 3.20821219    | 3.31415019    | 19.6723218     | 19.7011585     | 19.334223      | 2.601E-37 | 1.6078   | up        | PREDICTED: ABC transporter B family member 19 [Sesamum indicum]                                           |
| c44940.graph_c0 | 0.4173852     | 0.35352574    | 0.41258193    | 1.98346297     | 2.31761083     | 2.11355699     | 0.0003744 | 1.34723  | up        | PREDICTED: trimethylguanosine synthase [Sesamum indicum]                                                  |
| c44943.graph_c0 | 0.81198698    | 0.78377149    | 0.63351436    | 5.24809706     | 4.357934       | 5.53788835     | 4.356E-10 | 1.67751  | up        | PREDICTED: GDSL esterase/lipase At4g10955-1ike [Sesamum indicum]                                          |
| c44946.graph_c0 | 1.19838373    | 1.55945884    | 1.65546832    | 1.08872298     | 1.45486187     | 1.45695806     | 6.025E-05 | -1.23523 | down      | PREDICTED: protein TONSOKU [Sesamum indicum]                                                              |
| c44948.graph_c0 | 2.11903549    | 1.85601271    | 2.26920375    | 2.16042195     | 2.25967367     | 2.05961017     | 4.897E-05 | -1.03887 | down      | PREDICTED: protein LURP-one-related 15-like isoform X1 [Sesamum indicum]                                  |
| c44949.graph_c1 | 56.5040731    | 59.8192919    | 58.2672607    | 55.3303773     | 54.2306781     | 58.1946713     | 1.043E-41 | -1.14809 | down      | -                                                                                                         |
| c44950.graph_c0 | 1.01188815    | 1.01290141    | 1.23187864    | 0.11612123     | 0.06989772     | 0.06316932     | 2.706E-20 | -4.80257 | down      | hypothetical protein MIMGU_mgv1a010141mg [Erythranthe outtata]                                            |
| c44950.graph_c1 | 7.54125966    | 10.7320447    | 10.5081151    | 42.4608076     | 41.8559346     | 43.3769458     | 5.284E-13 | 1.05592  | up        | PREDICTED: U6 snRNA-associated Sm-like protein LSM7 [Sesamum indicum]                                     |
| c44951.graph_c0 | 3.85662586    | 3.34885679    | 3.07505689    | 15.1799586     | 16.0539506     | 14.6601474     | 1.265E-16 | 1.07011  | up        | PREDICTED: protein arginine N-methyltransferase 1.5 [Sesamum indicum]                                     |
| c44953.graph_c0 | 2.8128905     | 2.66142186    | 3.0204824     | 15.4869741     | 17.2199231     | 16.019364      | 4.117E-18 | 1.42816  | up        | PREDICTED: sucrose nonfermenting 4-like protein [Sesamum indicum]                                         |
| c44953.graph_c1 | 2.34556591    | 2.70010184    | 3.46626682    | 15.76888       | 16.9314618     | 12.9368302     | 2.672E-06 | 1.32604  | up        | PREDICTED: sucrose nonfermenting 4-like protein [Sesamum indicum]                                         |
| c44955.graph_c0 | 9.85043514    | 10.0468451    | 9.47654369    | 0.9287662      | 0.698824       | 0.85259884     | 3.01E-192 | -4.65551 | down      | PREDICTED: LOW QUALITY PROTEIN: serine carboxypeptidase 24-like [Sesamum indicum]                         |
| c44957.graph_c1 | 1.39953572    | 1.24527746    | 1.59863005    | 7.14282534     | 8.02080861     | 7.10116314     | 9.188E-10 | 1.29828  | up        | PREDICTED: digalactosyldiacylglycerol synthase 2, chloroplastic isoform X1 [Sesamum indicum]              |
| c44963.graph_c1 | 9.59943051    | 9.40603494    | 8.51333472    | 9.38430181     | 9.515652       | 9.7623276      | 1.215E-15 | -1.03015 | down      | PREDICTED: glutathione gamma-glutamylcysteinyltransferase 1 isoform X2 [Sesamum indicum]                  |
| c44975.graph_c0 | 9.42345285    | 9.75538094    | 6.83100564    | 2.69273432     | 1.37420548     | 1.38522233     | 1.553E-25 | -3.34164 | down      | -                                                                                                         |
| c44976.graph_c1 | 12.0529966    | 12.841891     | 12.7772976    | 12.5848584     | 12.0631848     | 12.8436184     | 1.408E-26 | -1.09783 | down      | PREDICTED: N-alpha-acetyltransferase 35, NatC auxiliary subunit isoform X1 [Sesamum indicum]              |
| c44978.graph_c0 | 2.5745445     | 2.65703329    | 2.51335176    | 16.1007144     | 17.9426005     | 15.3277267     | 4.372E-37 | 1.58161  | up        | PREDICTED: uncharacterized protein LOC105173611 isoform X1 [Sesamum indicum]                              |
| c44980.graph_c0 | 8.39767196    | 7.47569918    | 9.01024584    | 8.11808741     | 7.36197341     | 7.16584107     | 3.178E-14 | -1.22809 | down      | PREDICTED: probable inactive leucine-rich repeat receptor-like protein kinase At3g03770 [Sesamum indicum] |
| c44981.graph_c2 | 2.13231431    | 2.08152926    | 2.19661575    | 29.1635478     | 30.3678959     | 27.340149      | 4.08E-132 | 2.66892  | up        | hypothetical protein MIMGU_mgv1a006718mg [Erythranthe outtata]                                            |
| c44987.graph_c0 | 2.65136654    | 2.48814514    | 3.46518673    | 0.75547078     | 0.90949237     | 0.8487465      | 1.94E-13  | -2.86989 | down      | unnamed protein product [Coffea canephora]                                                                |
| c44990.graph_c0 | 17.7974046    | 18.1043169    | 17.2107649    | 7.7138033      | 6.82270153     | 8.58521973     | 8.552E-90 | -2.28893 | down      | PREDICTED: protein WEAK CHLOROPLAST MOVEMENT UNDER BLUE LIGHT 1-like isoform X2 [Sesamum indicum]         |
| c44996.graph_c0 | 69.7346194    | 65.9890045    | 71.4421605    | 18.4156888     | 17.9973958     | 20.2047106     | 3.43E-166 | -2.96197 | down      | PREDICTED: protein FAR1-RELATED SEQUENCE 5-like [Sesamum indicum]                                         |

| #ID             | 0 h-1<br>FPKM | 0 h-2<br>FPKM | 0 h-3<br>FPKM | 28 h-1<br>FPKM | 28 h-2<br>FPKM | 28 h-3<br>FPKM | FDR       | log2FC   | regulated | nr_annotation                                                                                       |
|-----------------|---------------|---------------|---------------|----------------|----------------|----------------|-----------|----------|-----------|-----------------------------------------------------------------------------------------------------|
| c45000.graph_c0 | 67.5039454    | 68.850497     | 64.6347832    | 66.4264561     | 64.3647309     | 67.7164203     | 1.587E-41 | -1.10764 | down      | PREDICTED: filaggrin-like [Sesamum indicum]                                                         |
| c45006.graph_c0 | 49.9460539    | 43.7946321    | 47.8284221    | 25.3754486     | 24.7710558     | 26.4594519     | 2.127E-73 | -1.97603 | down      | PREDICTED: uncharacterized protein LOC103488200 [Cucumis melo]                                      |
| c45009.graph_c0 | 0             | 0             | 0             | 0.40895065     | 0.46641359     | 0.60592965     | 2.388E-14 | Inf      | up        | --                                                                                                  |
| c45012.graph_c0 | 16.6244461    | 17.0790165    | 16.7472278    | 6.09148033     | 6.39152489     | 6.06303737     | 5.62E-138 | -2.53451 | down      | PREDICTED: peptide-N(4)-(N-acetyl-beta-glucosaminyl)asparagine amidase isoform X2 [Sesamum indicum] |
| c45014.graph_c1 | 32.0951012    | 33.760828     | 29.0601729    | 22.4793238     | 22.7955644     | 22.9517248     | 1.218E-73 | -1.56537 | down      | PREDICTED: IBC1 domain family member 15 [Sesamum indicum]                                           |
| c45015.graph_c0 | 13.7244357    | 16.8696752    | 14.1350905    | 5.79420897     | 4.63561925     | 4.90757254     | 9.39E-39  | -2.63454 | down      | PREDICTED: protein HEADING DATE 3A-like [Sesamum indicum]                                           |
| c45017.graph_c0 | 0.24815557    | 0.34155558    | 0.2590979     | 1.70212896     | 2.11700315     | 1.78444455     | 1.804E-07 | 1.63222  | up        | PREDICTED: calcium-transporting ATPase 12, plasma membrane-type-like [Sesamum indicum]              |
| c45018.graph_c0 | 0             | 0             | 0             | 2.60459486     | 5.43831771     | 6.44240092     | 7.33E-07  | Inf      | up        | hypothetical protein DI09_20p90 [Microsporidia sp. UGP3]                                            |
| c45019.graph_c0 | 55.6912742    | 51.0043415    | 45.9243801    | 17.2963001     | 19.2235793     | 15.4784399     | 1.171E-93 | -2.64253 | down      | BnaAnng27240D [Brassica napus]                                                                      |
| c45024.graph_c0 | 0.05279945    | 0             | 0.06784939    | 0.716321       | 0.50817698     | 0.8558927      | 8.521E-07 | 3.01052  | up        | PREDICTED: uncharacterized protein LOC105156561 isoform X1 [Sesamum indicum]                        |
| c45027.graph_c0 | 0.84021256    | 0.8831066     | 0.70180916    | 11.9995013     | 12.5161037     | 8.39626929     | 3.154E-13 | 2.67264  | up        | PREDICTED: uncharacterized protein LOC101264598 [Solanum lycopersicum]                              |
| c45030.graph_c0 | 0.96081742    | 1.37633968    | 1.04309884    | 5.89957096     | 4.81582537     | 5.64908366     | 1.381E-09 | 1.18536  | up        | PREDICTED: protein FAM91A1 isoform X1 [Sesamum indicum]                                             |
| c45031.graph_c0 | 28.4434448    | 30.0712008    | 28.2764391    | 19.2474466     | 19.094264      | 18.9359199     | 1.13E-84  | -1.68993 | down      | PREDICTED: uncharacterized protein LOC105156468 [Sesamum indicum]                                   |
| c45033.graph_c1 | 1.22881852    | 1.02156611    | 0.66910188    | 4.2081577      | 4.40094293     | 4.2613982      | 6.628E-06 | 1.05673  | up        | hypothetical protein MIMGU_mgv1a021825mg [Erythranae guttata]                                       |
| c45035.graph_c0 | 4.04935496    | 4.48008449    | 4.30371398    | 0.95151171     | 0.39959342     | 0.55974882     | 1.661E-61 | -3.83872 | down      | PREDICTED: protein NK11/PIR FAMILY 4.5-like [Sesamum indicum]                                       |
| c45041.graph_c0 | 97.5218459    | 95.8197111    | 88.4167488    | 51.074351      | 48.3754179     | 49.020285      | 7.98E-135 | -2.01361 | down      | PREDICTED: NF-kappa-B-activating protein [Sesamum indicum]                                          |
| c45042.graph_c0 | 1.79073689    | 2.30468148    | 2.08200896    | 11.5895231     | 9.90466705     | 10.8729711     | 7.883E-06 | 1.29794  | up        | putative retroelement pol polyprotein [Arabidopsis thaliana]                                        |
| c45045.graph_c0 | 0.43575289    | 0.43618923    | 0             | 15.5184319     | 11.1521606     | 12.6629137     | 1.341E-13 | 4.42511  | up        | -                                                                                                   |
| c45047.graph_c0 | 0.44647374    | 0.37988269    | 0.45898914    | 4.57537299     | 5.44957947     | 4.84556355     | 1.216E-20 | 2.44051  | up        | PREDICTED: subtilisin-like protease SBT3.5 [Sesamum indicum]                                        |
| c45055.graph_c0 | 56.1000721    | 60.1566661    | 52.4367033    | 49.770832      | 45.7271337     | 47.0813819     | 2.335E-58 | -1.33209 | down      | PREDICTED: transcription factor GTE9-like isoform X2 [Sesamum indicum]                              |
| c45056.graph_c0 | 2.14655714    | 1.32928459    | 2.22075454    | 8.4748096      | 8.66664876     | 9.10542412     | 3.047E-10 | 1.11191  | up        | PREDICTED: uncharacterized protein LOC105167041 isoform X1 [Sesamum indicum]                        |
| c45058.graph_c0 | 0.60482662    | 0.53816201    | 1.29537693    | 9.62201635     | 9.6579874      | 9.52540781     | 4.889E-15 | 2.46017  | up        | -                                                                                                   |
| c45063.graph_c0 | 89.4575033    | 81.6406427    | 82.1117382    | 85.2060697     | 86.6589259     | 89.5277854     | 8.868E-33 | -1.04359 | down      | PREDICTED: serine/arginine-rich splicing factor RSZ22 isoform X2 [Vitis vinifera]                   |
| c45063.graph_c2 | 0             | 0             | 0             | 2.10876535     | 2.76389622     | 3.44147062     | 1.012E-11 | Inf      | up        | PREDICTED: KH domain-containing protein At4g18375 [Sesamum indicum]                                 |

| #ID             | 0 h-1<br>FPKM | 0 h-2<br>FPKM | 0 h-3<br>FPKM | 28 h-1<br>FPKM | 28 h-2<br>FPKM | 28 h-3<br>FPKM | FDR       | log2FC   | regulated | nr_annotation                                                                                        |
|-----------------|---------------|---------------|---------------|----------------|----------------|----------------|-----------|----------|-----------|------------------------------------------------------------------------------------------------------|
| c45070.graph_c0 | 20.2945197    | 21.5979651    | 17.9122309    | 20.484788      | 18.5059169     | 18.3541864     | 1.097E-25 | -1.14954 | down      | PREDICTED: CCR4-NOT transcription complex subunit 1 isoform X1 [Sesamum indicum]                     |
| c45072.graph_c0 | 51.0523768    | 51.2982707    | 46.9138125    | 30.8821769     | 31.1636774     | 29.5269546     | 1.78E-107 | -1.79454 | down      | PREDICTED: extensin [Sesamum indicum]                                                                |
| c45073.graph_c0 | 46.9195677    | 48.8014571    | 49.6028436    | 40.9415421     | 38.9095374     | 40.808727      | 5.091E-58 | -1.35935 | down      | hypothetical protein MIMGU_mgv1a005118mg [Erythranthe diffusa]                                       |
| c45073.graph_c1 | 12.6562556    | 11.7237866    | 12.3914587    | 60.578651      | 61.7102718     | 61.8581118     | 5.291E-50 | 1.23375  | up        | PREDICTED: acyl-CoA dehydrogenase family member 10 [Sesamum indicum]                                 |
| c45073.graph_c2 | 2.90514396    | 2.90805303    | 2.28141529    | 2.18964344     | 2.29478174     | 2.83962632     | 2.217E-05 | -1.23063 | down      | PREDICTED: phosphatidylcholine:diacylglycerol cholinephosphotransferase 1-like [Sesamum indicum]     |
| c45075.graph_c0 | 152.483753    | 147.835513    | 148.12963     | 71.0141041     | 64.6834299     | 67.7551432     | 1.46E-159 | -2.23042 | down      | PREDICTED: uncharacterized protein LOC105179151 [Sesamum indicum]                                    |
| c45078.graph_c0 | 273.655042    | 248.88511     | 259.444151    | 28.1741218     | 31.2761305     | 37.213546      | 0         | -4.10516 | down      | PREDICTED: uncharacterized protein LOC105174597 [Sesamum indicum]                                    |
| c45079.graph_c0 | 1.24903221    | 1.25620844    | 1.19428326    | 7.58498928     | 7.11268635     | 6.90897411     | 3.813E-43 | 1.45589  | up        | PREDICTED: probable LRR receptor-like serine/threonine-protein kinase At4g20940 [Sesamum indicum]    |
| c45081.graph_c0 | 4.7870349     | 5.10893468    | 3.79947402    | 31.1080462     | 33.4926736     | 30.456519      | 1.185E-43 | 1.70731  | up        | PREDICTED: uncharacterized protein LOC105177718 [Sesamum indicum]                                    |
| c45092.graph_c0 | 1.01112717    | 0.82470639    | 0.67373105    | 0              | 0              | 0              | 1.406E-29 | -Inf     | down      | -                                                                                                    |
| c45094.graph_c0 | 27.2853971    | 27.3875487    | 26.8975024    | 23.7209796     | 23.2525125     | 23.8870374     | 3.751E-56 | -1.29331 | down      | PREDICTED: pentatricopeptide repeat-containing protein At1g63330-like [Sesamum indicum]              |
| c45095.graph_c1 | 0.3721209     | 0.10642672    | 0.06831287    | 1.66136841     | 1.4651748      | 1.00886553     | 0.0038444 | 1.84456  | up        | PREDICTED: putative phospholipid-transporting ATPase 5 [Sesamum indicum]                             |
| c45095.graph_c2 | 0.54124028    | 0.61917972    | 0.39743725    | 4.1865841      | 4.21137868     | 4.1269753      | 2.477E-08 | 1.92069  | up        | PREDICTED: putative phospholipid-transporting ATPase 5 [Sesamum indicum]                             |
| c45097.graph_c0 | 1.17966417    | 1.01012078    | 1.1506344     | 6.12556939     | 5.5494685      | 6.32177226     | 1.976E-16 | 1.33946  | up        | PREDICTED: RNA polymerase II C-terminal domain phosphatase-like 3 [Sesamum indicum]                  |
| c45104.graph_c0 | 64.4749031    | 62.2293275    | 58.7939802    | 66.50554       | 61.3544873     | 60.1190647     | 7.861E-41 | -1.07048 | down      | PREDICTED: mRNA-decapping enzyme-like protein [Sesamum indicum]                                      |
| c45105.graph_c0 | 0.63454337    | 0.40116554    | 0.47208141    | 3.83509626     | 3.2654881      | 4.11972597     | 4.34E-08  | 1.80889  | up        | hypothetical protein VITISV_036763 [Vitis vinifera]                                                  |
| c45106.graph_c0 | 16.4335965    | 15.3204349    | 11.3293037    | 58.3095351     | 80.1638775     | 63.4749965     | 4.835E-06 | 1.14207  | up        | PREDICTED: UDP-glycosyltransferase 1.3C3-like [Sesamum indicum]                                      |
| c45111.graph_c0 | 3.98126084    | 4.48045574    | 3.87489917    | 22.2581341     | 21.0091032     | 21.9765714     | 4.42E-30  | 1.31318  | up        | PREDICTED: uncharacterized protein LOC105175953 [Sesamum indicum]                                    |
| c45113.graph_c0 | 5.26336289    | 2.4085181     | 3.60726917    | 0              | 0              | 0              | 2.428E-17 | -Inf     | down      | --                                                                                                   |
| c45114.graph_c0 | 161.019614    | 176.007028    | 192.62196     | 30.5077141     | 27.5859358     | 30.72574       | 8.871E-59 | -3.66842 | down      | PREDICTED: serine/arginine repetitive matrix protein 1-like [Sesamum indicum]                        |
| c45124.graph_c0 | 24.886053     | 22.1069053    | 21.1803644    | 23.1046501     | 22.2963648     | 22.7224538     | 7.852E-38 | -1.08974 | down      | PREDICTED: elongation factor Tu GTP-binding domain-containing protein 1 isoform X1 [Sesamum indicum] |
| c45132.graph_c0 | 2.04244581    | 2.68173496    | 2.82913987    | 1.23381847     | 1.0269894      | 0.94386168     | 6.405E-13 | -2.33158 | down      | ribosomal protein S3 (mitochondrion) [Rhazya stricta]                                                |

| #ID             | 0 h-1<br>FPKM | 0 h-2<br>FPKM | 0 h-3<br>FPKM | 28 h-1<br>FPKM | 28 h-2<br>FPKM | 28 h-3<br>FPKM | FDR       | log2FC   | regulated | nr_annotation                                                                                     |
|-----------------|---------------|---------------|---------------|----------------|----------------|----------------|-----------|----------|-----------|---------------------------------------------------------------------------------------------------|
| c45134.graph_c0 | 1.35216416    | 1.43638661    | 1.89715857    | 6.93938392     | 6.98090702     | 6.50530648     | 5.324E-13 | 1.02866  | up        | PREDICTED: filament-like plant protein [Sesamum indicum]                                          |
| c45137.graph_c0 | 4.82192231    | 7.00657365    | 5.09700669    | 1.97837237     | 2.90909232     | 2.49068936     | 1.488E-10 | -2.28818 | down      | PREDICTED: receptor-like protein kinase HAIKU2 [Sesamum indicum]                                  |
| c45137.graph_c2 | 9.29012208    | 10.7320388    | 10.3571732    | 6.02206046     | 6.37653564     | 6.73062538     | 7.976E-36 | -1.7585  | down      | PREDICTED: receptor-like protein kinase HAIKU2 [Sesamum indicum]                                  |
| c45141.graph_c0 | 2.39613337    | 2.47121555    | 1.95944398    | 16.0780533     | 15.1999396     | 15.1004128     | 3.267E-32 | 1.67618  | up        | PREDICTED: uncharacterized protein LOC105159160 [Sesamum indicum]                                 |
| c45142.graph_c0 | 155.033464    | 162.348159    | 144.768678    | 148.577037     | 151.647192     | 144.895718     | 6.071E-45 | -1.14387 | down      | PREDICTED: suppressor of mec-8 and unc-52 protein homolog 1 [Sesamum indicum]                     |
| c45147.graph_c0 | 108.327671    | 112.504683    | 107.060343    | 36.3612184     | 34.5020725     | 38.6295284     | 4.38E-217 | -2.6722  | down      | PREDICTED: phytochrome C [Sesamum indicum]                                                        |
| c45150.graph_c0 | 5.02032182    | 3.96531437    | 3.85566712    | 20.9945134     | 20.757741      | 20.7250974     | 3.872E-28 | 1.19489  | up        | hypothetical protein MIMGU_mgv1a000960mg [Erythranthe guttata]                                    |
| c45151.graph_c0 | 0             | 0             | 0             | 2.61383076     | 2.20094001     | 3.83436324     | 6.295E-12 | Inf      | up        | mitochondrial carrier, adenine nucleotidetranslocator [Galdieria sulphuraria]                     |
| c45153.graph_c1 | 18.9850355    | 20.4318113    | 20.3515031    | 19.4819349     | 21.8185023     | 20.5349692     | 1.236E-20 | -1.04233 | down      | PREDICTED: vesicle-associated protein 4-2 [Sesamum indicum]                                       |
| c45156.graph_c1 | 58.1948419    | 55.7806183    | 55.4940473    | 30.5775641     | 27.6086734     | 29.8607639     | 1.57E-133 | -2.0345  | down      | PREDICTED: casein kinase I isoform alpha-like isoform X2 [Sesamum indicum]                        |
| c45158.graph_c0 | 0.01463921    | 0             | 0.03762392    | 0.75541801     | 0.82617127     | 0.59905112     | 1.159E-12 | 4.2709   | up        | PREDICTED: uncharacterized protein LOC105177021 [Sesamum indicum]                                 |
| c45162.graph_c0 | 0             | 0             | 0             | 0.65873689     | 0.66086406     | 1.22436005     | 1.155E-06 | Inf      | up        | -                                                                                                 |
| c45163.graph_c0 | 1.31455666    | 0.83547492    | 0.64352661    | 0              | 0              | 0              | 9.404E-17 | -Inf     | down      | -                                                                                                 |
| c45166.graph_c0 | 0.43845343    | 0.34136081    | 0.31301667    | 3.29287604     | 3.00512777     | 2.97588039     | 2.207E-06 | 1.9982   | up        | hypothetical protein MIMGU_mgv1a000601/mg [Erythranthe guttata]                                   |
| c45169.graph_c0 | 21.094801     | 20.0008919    | 22.0081947    | 18.6964314     | 18.6628942     | 18.7037329     | 7.32E-37  | -1.26196 | down      | hypothetical protein MIMGU_mgv1a012191mg [Erythranthe guttata]                                    |
| c45170.graph_c0 | 0.48349414    | 0.31393186    | 0.50376415    | 6.25873238     | 5.84827784     | 5.86654842     | 6.147E-46 | 2.69556  | up        | PREDICTED: probable LRR receptor-like serine/threonine-protein kinase At4g26540 [Sesamum indicum] |
| c45175.graph_c0 | 0             | 0             | 0             | 8.65041327     | 16.1467318     | 17.9181536     | 2.5E-12   | Inf      | up        | predicted protein [Hordeum vulgare subsp. vulgare]                                                |
| c45180.graph_c0 | 6.30938785    | 6.25944111    | 5.86868437    | 45.5498779     | 36.8024509     | 37.776689      | 1.48E-20  | 1.61405  | up        | PREDICTED: pentatricopeptide repeat-containing protein At5g24830 isoform X1 [Sesamum indicum]     |
| c45183.graph_c0 | 2.35360189    | 2.35595866    | 1.84098272    | 11.0568202     | 11.6620733     | 10.4180978     | 2.661E-11 | 1.2509   | up        | hypothetical protein OsJ_01978 [Oryza sativa Japonica Group]                                      |
| c45187.graph_c0 | 1.02135072    | 0.4868445     | 0.62498863    | 5.40827182     | 6.98962458     | 5.59570257     | 1.027E-09 | 1.99039  | up        | PREDICTED: dicer-like protein 4 isoform X1 [Sesamum indicum]                                      |
| c45187.graph_c1 | 0.39843388    | 0.15953314    | 0.20480132    | 2.83787857     | 2.71921612     | 3.96974698     | 3.727E-07 | 2.56141  | up        | PREDICTED: dicer-like protein 4 isoform X1 [Sesamum indicum]                                      |
| c45187.graph_c2 | 0.19175547    | 0.28792123    | 0.12320669    | 2.64796865     | 2.65512118     | 3.28657005     | 1.531E-16 | 2.74916  | up        | PREDICTED: dicer-like protein 4 isoform X2 [Sesamum indicum]                                      |
| c45194.graph_c0 | 1.76913513    | 1.46947573    | 2.0799271     | 12.0919653     | 12.671693      | 12.076962      | 1.256E-18 | 1.69864  | up        | hypothetical protein OsI_30754 [Oryza sativa Indica Group]                                        |
| c45195.graph_c0 | 0.05059501    | 0.05064567    | 0.06501659    | 1.50765859     | 2.25772331     | 1.2302371      | 1.74E-06  | 3.81285  | up        | PREDICTED: glutamine-dependent NAD(+) synthetase-like [Sesamum indicum]                           |
| c45195.graph_c1 | 0.19245222    | 0.04816123    | 0.24730873    | 1.71344628     | 1.95753149     | 2.22563954     | 2.623E-07 | 2.49834  | up        | PREDICTED: glutamine-dependent NAD(+) synthetase-like [Sesamum indicum]                           |



| #ID             | 0 h-1<br>FPKM | 0 h-2<br>FPKM | 0 h-3<br>FPKM | 28 h-1<br>FPKM | 28 h-2<br>FPKM | 28 h-3<br>FPKM | FDR       | log2FC   | regulated | nr_annotation                                                                |
|-----------------|---------------|---------------|---------------|----------------|----------------|----------------|-----------|----------|-----------|------------------------------------------------------------------------------|
| c45196.graph_c0 | 13.9914558    | 14.8162022    | 14.362844     | 11.2726261     | 11.8789076     | 11.3478595     | 7.503E-50 | -1.41434 | down      | PREDICTED: eukaryotic translation initiation factor 2D [Sesamum indicum]     |
| c45198.graph_c0 | 36.1787492    | 37.5813431    | 35.6287127    | 7.44510426     | 6.37707987     | 7.06291224     | 0         | -3.47891 | down      | hypothetical protein MIMGU_mgv1a000558mg [Erythranthe outtata]               |
| c45198.graph_c1 | 34.7965878    | 35.8175002    | 35.6305148    | 9.09680474     | 9.31630849     | 10.1205994     | 2.42E-229 | -2.98699 | down      | cryptochrome 1 family protein [Populus trichocarpa]                          |
| c45201.graph_c0 | 22.0402413    | 20.0152927    | 25.4027288    | 21.4683881     | 22.8134082     | 22.7734382     | 5.983E-07 | -1.10138 | down      | -                                                                            |
| c45206.graph_c0 | 15.4898248    | 17.1338545    | 14.781552     | 13.7060124     | 12.4654646     | 13.0864962     | 3.518E-43 | -1.36162 | down      | PREDICTED: uncharacterized protein LOC105171856 [Sesamum indicum]            |
| c45208.graph_c0 | 18.2590242    | 18.9000901    | 15.6076185    | 14.3518579     | 14.7335029     | 14.1654958     | 7.554E-35 | -1.37547 | down      | PREDICTED: uncharacterized protein At2g53490 [Sesamum indicum]               |
| c45213.graph_c1 | 0.04501424    | 0.3604745     | 0.17353523    | 80.2525644     | 71.5152753     | 71.2250902     | 1.88E-234 | 7.49433  | up        | PREDICTED: nudix hydrolase 18, mitochondrial-like [Sesamum indicum]          |
| c45215.graph_c1 | 2.21491176    | 3.56569307    | 2.64084987    | 26.9182623     | 27.526309      | 25.9057967     | 3.712E-77 | 2.16275  | up        | PREDICTED: U-box domain-containing protein 15 [Sesamum indicum]              |
| c45216.graph_c1 | 2.836692      | 2.14696361    | 2.93399099    | 0.10057031     | 0.27241669     | 0.57445187     | 8.436E-23 | -4.14938 | down      | -                                                                            |
| c45216.graph_c2 | 31.437625     | 31.3199624    | 27.139813     | 27.694555      | 28.7209816     | 31.7439772     | 1.527E-33 | -1.11626 | down      | PREDICTED: calpain-15 [Sesamum indicum]                                      |
| c45218.graph_c0 | 98.9272002    | 98.191523     | 96.7822241    | 49.1240316     | 54.6941529     | 54.7391899     | 3.18E-127 | -1.98044 | down      | PREDICTED: 4-coumarate--CoA ligase 1-like [Sesamum indicum]                  |
| c45223.graph_c0 | 3.90105376    | 3.37465685    | 2.78500474    | 17.1865966     | 16.4028156     | 15.8806764     | 3.053E-11 | 1.21105  | up        | PREDICTED: uncharacterized protein LOC105166056 isoform X1 [Sesamum indicum] |
| c45225.graph_c0 | 5.29028877    | 3.32024849    | 3.56097789    | 21.6965114     | 22.8411252     | 23.4312655     | 2.333E-19 | 1.3953   | up        | hypothetical protein MIMGU_mgv1a011604mg [Erythranthe outtata]               |
| c45227.graph_c0 | 123.706499    | 131.599807    | 115.83258     | 49.9560008     | 49.4376113     | 47.9530936     | 1.96E-171 | -2.42241 | down      | PREDICTED: uncharacterized protein LOC105178162 [Sesamum indicum]            |
| c45234.graph_c0 | 9.91884346    | 10.1702864    | 9.95574268    | 8.76765194     | 9.02465912     | 9.205241       | 1.29E-26  | -1.24468 | down      | -                                                                            |
| c45235.graph_c0 | 48.9696439    | 50.1154831    | 42.9989478    | 16.9684455     | 15.9108904     | 17.2784827     | 3.28E-132 | -2.59069 | down      | PREDICTED: outer envelope protein 61 [Sesamum indicum]                       |
| c45238.graph_c0 | 403.374093    | 396.509747    | 391.610168    | 345.722559     | 385.272968     | 369.973591     | 1.961E-43 | -1.20424 | down      | PREDICTED: 8-hydroxygeraniol dehydrogenase [Sesamum indicum]                 |
| c45240.graph_c0 | 71.0528903    | 74.2869097    | 66.4231309    | 69.0997895     | 72.1466438     | 69.1657534     | 6.12E-42  | -1.09891 | down      | PREDICTED: crt homolog 1 [Sesamum indicum]                                   |
| c45242.graph_c0 | 4.05869351    | 4.31005597    | 4.80740588    | 1.43644142     | 1.57489447     | 1.4023632      | 1.004E-32 | -2.67095 | down      | PREDICTED: serine/threonine-protein kinase TIO isoform X2 [Sesamum indicum]  |
| c45246.graph_c0 | 0.13556302    | 0.09046585    | 0.05806795    | 7.48800831     | 5.96032832     | 6.27094715     | 3.083E-28 | 5.03599  | up        | PREDICTED: WAI1-related protein At5g40240-like [Sesamum indicum]             |
| c45248.graph_c0 | 194.914687    | 191.294407    | 202.196762    | 179.410406     | 178.690113     | 196.226543     | 7.087E-43 | -1.17673 | down      | PREDICTED: aldehyde dehydrogenase [Nicotiana glauca]                         |
| c45251.graph_c0 | 0.60149642    | 0.88730339    | 0.44749547    | 2.87607982     | 3.03309793     | 2.44073196     | 0.0032199 | 1.02148  | up        | PREDICTED: uncharacterized protein LOC105179935 isoform X1 [Sesamum indicum] |
| c45253.graph_c0 | 0             | 0             | 0             | 12.367585      | 14.3163714     | 17.8548087     | 2.328E-14 | Inf      | up        | -                                                                            |
| c45255.graph_c1 | 78.5206363    | 81.9231123    | 67.3684844    | 68.2832696     | 66.8061269     | 68.3682163     | 1.171E-28 | -1.25149 | down      | PREDICTED: anamorsin homolog isoform X1 [Sesamum indicum]                    |
| c45257.graph_c0 | 2.92607756    | 3.2014734     | 2.66706577    | 20.1043207     | 20.586022      | 20.9854366     | 3.308E-32 | 1.72105  | up        | PREDICTED: acyl-coenzyme A thioesterase 8-like [Sesamum indicum]             |
| c45258.graph_c0 | 29.6324645    | 25.4331977    | 23.9331176    | 411.87866      | 440.611306     | 405.961258     | 1.22E-260 | 2.90526  | up        | ascorbate peroxidase [Acanthus ebracteatus]                                  |

| #ID             | 0 h-1<br>FPKM | 0 h-2<br>FPKM | 0 h-3<br>FPKM | 28 h-1<br>FPKM | 28 h-2<br>FPKM | 28 h-3<br>FPKM | FDR       | log2FC   | regulated | nr_annotation                                                                                   |
|-----------------|---------------|---------------|---------------|----------------|----------------|----------------|-----------|----------|-----------|-------------------------------------------------------------------------------------------------|
| c45259.graph_c0 | 0.08349071    | 0.16714864    | 0.21457775    | 9.28412722     | 8.30964459     | 7.97189079     | 9.631E-54 | 4.67955  | up        | PREDICTED: LRR receptor-like serine/threonine-protein kinase FEI 2 isoform X1 [Sesamum indicum] |
| c45266.graph_c0 | 2.253657      | 1.73531823    | 2.3231957     | 100.364625     | 93.6589266     | 86.8757292     | 3.44E-205 | 4.3836   | up        | PREDICTED: phosphomethylpyrimidine synthase, chloroplastic isoform X1 [Sesamum indicum]         |
| c45267.graph_c2 | 0.54284464    | 1.19545407    | 0.13951537    | 25.1714193     | 26.2184791     | 25.7550754     | 4.285E-38 | 4.28162  | up        | -                                                                                               |
| c45271.graph_c0 | 2.66471019    | 2.87256146    | 1.77798017    | 15.0466382     | 18.4953885     | 15.6817176     | 6.811E-16 | 1.66445  | up        | PREDICTED: dot zinc finger protein DUF5.4-like [Sesamum indicum]                                |
| c45275.graph_c0 | 4.47874616    | 4.58749213    | 4.73813863    | 22.4528055     | 21.571439      | 20.7797954     | 1.853E-26 | 1.13949  | up        | hypothetical protein MIMGU_mgv1a001439mg [Erythranthe outtata]                                  |
| c45282.graph_c0 | 144.030981    | 136.330166    | 148.096257    | 78.2481755     | 74.3954225     | 89.0385504     | 4.285E-73 | -1.91633 | down      | branched-chain amino acid aminotransferase, putative [Ricinus communis]                         |
| c45285.graph_c0 | 11.6343034    | 11.0198269    | 11.7353705    | 3.77326241     | 4.82302417     | 3.7652236      | 2.208E-85 | -2.56779 | down      | PREDICTED: U-box domain-containing protein 19-like [Sesamum indicum]                            |
| c45287.graph_c0 | 1.45650738    | 2.1634332     | 1.99242253    | 1.6732412      | 1.60327666     | 1.28175823     | 2.387E-05 | -1.39447 | down      | hypothetical protein MIMGU_mgv1a006543mg [Erythranthe outtata]                                  |
| c45290.graph_c0 | 0.80401608    | 0.98367033    | 0.688795      | 7.66153353     | 6.97627056     | 6.51665341     | 3.404E-07 | 2.0061   | up        | -                                                                                               |
| c45290.graph_c1 | 18.9139961    | 18.949558     | 17.1139575    | 17.2345224     | 17.0213786     | 16.3677084     | 1.145E-45 | -1.20846 | down      | PREDICTED: WD repeat-containing protein 26-like [Sesamum indicum]                               |
| c45292.graph_c0 | 0.62928407    | 0.71390276    | 0.43128264    | 47.3215182     | 41.4054438     | 40.9775854     | 7.56E-130 | 5.10581  | up        | PREDICTED: pentatricopeptide repeat-containing protein At5g59600 [Sesamum indicum]              |
| c45297.graph_c0 | 5.17558453    | 2.10743068    | 3.15632659    | 0              | 0              | 0              | 8.168E-12 | -Inf     | down      | hypothetical protein SORBIDRAFT_05g002010 [Sorghum bicolor]                                     |
| c45300.graph_c0 | 68.3283747    | 74.0017582    | 60.5873056    | 21.4095283     | 19.8100726     | 21.8976587     | 4.589E-76 | -2.77319 | down      | PREDICTED: uncharacterized protein LOC105166619 [Sesamum indicum]                               |
| c45303.graph_c0 | 2.46053958    | 3.39724612    | 3.05286006    | 39.7743917     | 38.8078216     | 36.1288459     | 9.811E-43 | 2.59367  | up        | PREDICTED: S-type anion channel SLAH2 [Sesamum indicum]                                         |
| c45304.graph_c0 | 62.763009     | 60.6965632    | 58.2143091    | 46.0744995     | 45.3284722     | 46.5380407     | 1.006E-75 | -1.48684 | down      | PREDICTED: cytochrome b-c1 complex subunit Rieske-4, mitochondrial-like [Sesamum indicum]       |
| c45320.graph_c1 | 7.15344582    | 10.0037919    | 7.29989557    | 1.03217093     | 1.20808796     | 1.06060236     | 4.5E-24   | -3.9795  | down      | PREDICTED: laccase-17-like [Sesamum indicum]                                                    |
| c45321.graph_c1 | 66.4375836    | 71.807053     | 60.1158516    | 66.5490416     | 66.1855854     | 68.1926654     | 4.468E-27 | -1.07034 | down      | PREDICTED: UDP-glucuronate 4-epimerase 1 [Sesamum indicum]                                      |
| c45321.graph_c2 | 19.9779263    | 20.3534499    | 21.1845058    | 21.7474962     | 18.5288787     | 19.4483912     | 4.724E-33 | -1.13393 | down      | PREDICTED: protein FAR1-RELATED SEQUENCE 4 [Sesamum indicum]                                    |
| c45326.graph_c0 | 1.7671061     | 1.96541733    | 2.46003475    | 0.21405376     | 0.19327047     | 0.08733306     | 4.034E-25 | -4.74407 | down      | conserved hypothetical protein [Ricinus communis]                                               |
| c45328.graph_c0 | 5.61503585    | 5.2279487     | 7.02648984    | 30.8835409     | 27.8205796     | 28.7634268     | 3.49E-20  | 1.19734  | up        | PREDICTED: RNA polymerase sigma factor sigA [Sesamum indicum]                                   |
| c45330.graph_c0 | 3.27671551    | 3.70875438    | 2.58697164    | 14.4446412     | 12.7470216     | 14.2126375     | 3.65E-12  | 1.0259   | up        | PREDICTED: uncharacterized protein LOC105167904 [Sesamum indicum]                               |
| c45331.graph_c0 | 138.570724    | 153.051674    | 120.498966    | 95.1523948     | 98.6236118     | 84.4717205     | 4.338E-25 | -1.65585 | down      | PREDICTED: ferredoxin--nitrite reductase, chloroplastic [Sesamum indicum]                       |
| c45334.graph_c0 | 549.462852    | 508.971473    | 599.222047    | 347.162078     | 344.07339      | 373.833173     | 6.522E-26 | -1.72978 | down      | hypothetical protein MIMGU_mgv1a010052mg [Erythranthe outtata]                                  |
| c45339.graph_c0 | 0.7027507     | 0.4689696     | 0.66893517    | 0              | 0              | 0              | 1.159E-29 | -Inf     | down      | -                                                                                               |

| #ID             | 0 h-1<br>FPKM | 0 h-2<br>FPKM | 0 h-3<br>FPKM | 28 h-1<br>FPKM | 28 h-2<br>FPKM | 28 h-3<br>FPKM | FDR       | log2FC   | regulated | nr_annotation                                                                               |
|-----------------|---------------|---------------|---------------|----------------|----------------|----------------|-----------|----------|-----------|---------------------------------------------------------------------------------------------|
| c45340.graph_c0 | 12.746407     | 11.6195955    | 10.9720061    | 12.6475231     | 11.7530417     | 12.8521188     | 1.589E-25 | -1.01237 | down      | PREDICTED: B3 domain-containing transcription repressor VAL1 [Populus euphratica]           |
| c45342.graph_c0 | 62.5889661    | 61.4687891    | 59.2969945    | 35.5841408     | 37.1953632     | 35.355224      | 1.05E-114 | -1.85187 | down      | PREDICTED: uncharacterized protein At4g26450 [Sesamum indicum]                              |
| c45349.graph_c0 | 7.64421738    | 6.17467656    | 6.56139036    | 55.150165      | 50.8219384     | 50.9008406     | 8.042E-80 | 1.85518  | up        | PREDICTED: uncharacterized protein LOC105168326 [Sesamum indicum]                           |
| c45351.graph_c1 | 45.7970811    | 52.5144262    | 43.708727     | 16.5362338     | 18.4268308     | 17.3840998     | 1.106E-58 | -2.52958 | down      | PREDICTED: cytochrome P450 710A1-like [Sesamum indicum]                                     |
| c45351.graph_c2 | 0.08565664    | 0.08574241    | 0.03669072    | 2.36568054     | 1.57388569     | 1.82877726     | 1.967E-12 | 3.71184  | up        | PREDICTED: potassium channel KAT3-like [Sesamum indicum]                                    |
| c45352.graph_c0 | 1.72126275    | 1.66357301    | 1.37289773    | 39.8595709     | 37.1189945     | 34.2498994     | 2.072E-80 | 3.45891  | up        | PREDICTED: uncharacterized protein LOC105164615 [Sesamum indicum]                           |
| c45353.graph_c0 | 1.12739325    | 0.75234811    | 2.99407291    | 11.908365      | 12.5277194     | 13.1938994     | 4.618E-08 | 1.84256  | up        | PREDICTED: protein ZINC INDUCED FACILITATOR-LIKE 1-like isoform X2 [Pyrus x bretschneideri] |
| c45353.graph_c1 | 1.32552492    | 1.99027835    | 2.64965868    | 13.0592036     | 16.2371125     | 14.9798271     | 2.884E-13 | 1.79328  | up        | PREDICTED: protein ZINC INDUCED FACILITATOR 1-like [Sesamum indicum]                        |
| c45356.graph_c1 | 19.9560017    | 19.3257717    | 18.904714     | 13.2449784     | 13.0640933     | 13.5257939     | 7.984E-86 | -1.63643 | down      | PREDICTED: uncharacterized protein LOC105174921 [Sesamum indicum]                           |
| c45357.graph_c0 | 4.949178      | 4.6789042     | 4.71102939    | 0.93256438     | 1.44345977     | 1.03273811     | 1.584E-20 | -3.16375 | down      | PREDICTED: two-component response regulator-like APRR9 [Sesamum indicum]                    |
| c45368.graph_c1 | 4.92600197    | 3.67578762    | 3.65419846    | 19.3330251     | 18.7636329     | 19.5601389     | 1.248E-22 | 1.14688  | up        | PREDICTED: E3 ubiquitin-protein ligase HOS1 isoform X1 [Sesamum indicum]                    |
| c45371.graph_c0 | 0.07905292    | 0.07913208    | 0.05079307    | 2.35566351     | 2.46414161     | 2.20350007     | 1.061E-12 | 3.98516  | up        | -                                                                                           |
| c45372.graph_c0 | 72.9417579    | 74.0937109    | 66.8371382    | 35.5974813     | 33.1610211     | 35.0083333     | 1.23E-150 | -2.13261 | down      | PREDICTED: uncharacterized RING finger protein C4G3.12c [Sesamum indicum]                   |
| c45377.graph_c0 | 15.2341062    | 17.0401115    | 15.4097033    | 91.0346855     | 91.7342388     | 89.4685055     | 4.754E-65 | 1.42282  | up        | PREDICTED: transmembrane 9 superfamily member 1-like [Sesamum indicum]                      |
| c45382.graph_c0 | 1684.32576    | 1714.14098    | 1965.92845    | 313.682817     | 322.034612     | 324.870773     | 2.951E-59 | -3.57395 | down      | Polyubiquitin [Triticum urartu]                                                             |
| c45383.graph_c1 | 3.59887452    | 3.34515837    | 2.1471804     | 18.1537959     | 18.8934305     | 18.8279447     | 2.029E-19 | 1.53534  | up        | PREDICTED: GTP-binding protein OBGC, chloroplastic [Sesamum indicum]                        |
| c45387.graph_c0 | 0.67738532    | 1.0431748     | 0.80350796    | 10.1493609     | 10.497477      | 10.6303645     | 1.466E-19 | 2.54013  | up        | PREDICTED: nudix hydrolase 9 isoform X1 [Sesamum indicum]                                   |
| c45390.graph_c0 | 16.8134457    | 17.7510875    | 17.9940076    | 16.9741683     | 17.3382596     | 20.3063991     | 5.754E-18 | -1.03501 | down      | General transcription factor IIE subunit 1 isoform 2 [Theobroma cacao]                      |
| c45393.graph_c1 | 13.3086455    | 12.0405483    | 13.4706482    | 73.2909265     | 73.9731628     | 71.8230551     | 2.869E-63 | 1.4055   | up        | PREDICTED: aldehyde dehydrogenase family 7 member B4 isoform X1 [Sesamum indicum]           |
| c45395.graph_c0 | 45.9040321    | 48.8606238    | 45.3026363    | 17.9818914     | 19.6118678     | 17.5097353     | 5.72E-191 | -2.43651 | down      | PREDICTED: probable protein phosphatase 2C 4 [Sesamum indicum]                              |
| c45397.graph_c0 | 0.47487361    | 0.50036749    | 0.32117441    | 14.5501818     | 14.2855418     | 13.9776258     | 7.398E-84 | 3.95972  | up        | PREDICTED: choline transporter-like protein 2 [Sesamum indicum]                             |
| c45401.graph_c1 | 5.49494379    | 5.15231664    | 4.06690537    | 28.6130444     | 27.7291511     | 26.6687082     | 2.647E-29 | 1.40901  | up        | PREDICTED: mitogen-activated protein kinase kinase 2 [Sesamum indicum]                      |

| #ID             | 0 h-1<br>FPKM | 0 h-2<br>FPKM | 0 h-3<br>FPKM | 28 h-1<br>FPKM | 28 h-2<br>FPKM | 28 h-3<br>FPKM | FDR       | log2FC   | regulated | nr_annotation                                                                                          |
|-----------------|---------------|---------------|---------------|----------------|----------------|----------------|-----------|----------|-----------|--------------------------------------------------------------------------------------------------------|
| c45402.graph_c0 | 1.50636294    | 1.23371291    | 1.26116134    | 1.29387334     | 0.88367349     | 0.97457546     | 2.3E-07   | -1.43298 | down      | PREDICTED: cellulose synthase-like protein EI [Sesamum indicum]                                        |
| c45405.graph_c0 | 0.82191259    | 0.68931902    | 0.91346181    | 10.3165916     | 10.2187095     | 10.1704108     | 1.529E-43 | 2.57005  | up        | PREDICTED: beta-amylase 7 [Sesamum indicum]                                                            |
| c45406.graph_c0 | 931.010988    | 935.738944    | 932.214349    | 296.21273      | 323.017887     | 336.277759     | 5.82E-139 | -2.64078 | down      | 15.5 kDa oleosin [Sesamum indicum]                                                                     |
| c45407.graph_c0 | 0.29075334    | 0.40746228    | 0.44835547    | 3.63466709     | 3.43440377     | 3.89700034     | 3.177E-07 | 2.16301  | up        | PREDICTED: root phototropism protein 3 [Populus euphratica]                                            |
| c45407.graph_c1 | 0.48980468    | 0.57681782    | 0.62941841    | 8.52275283     | 9.2456404      | 7.84303191     | 3.947E-32 | 2.82248  | up        | hypothetical protein MIMGU_mgv1a005061mg [Erythranthe outtata]                                         |
| c45420.graph_c0 | 8.04712808    | 5.76150596    | 5.74882719    | 30.3334497     | 27.0660462     | 27.4211641     | 3.132E-12 | 1.02972  | up        | PREDICTED: L-aminoadipate-semialdehyde dehydrogenase-phosphopantetheinyl transferase [Sesamum indicum] |
| c45423.graph_c0 | 19.8316666    | 20.0199366    | 20.7010702    | 9.64469178     | 10.4747442     | 10.5016345     | 2.21E-111 | -2.07463 | down      | PREDICTED: aspartic proteinase nepenthesin-1 [Sesamum indicum]                                         |
| c45424.graph_c0 | 139.42402     | 138.631966    | 132.480324    | 39.504822      | 39.0894798     | 37.7002108     | 0         | -2.9098  | down      | hypothetical protein F383_22559 [Gossypium arboreum]                                                   |
| c45426.graph_c0 | 0.33770523    | 0.28170283    | 0.28930973    | 2.0453518      | 2.28998352     | 2.63700477     | 5.207E-05 | 1.85166  | up        | hypothetical protein MIMGU_mgv1a010549mg [Erythranthe outtata]                                         |
| c45427.graph_c0 | 1.10820511    | 0.82828839    | 1.13926995    | 6.01393024     | 5.23608603     | 5.50320657     | 2.97E-15  | 1.35368  | up        | PREDICTED: alpha-N-acetylglucosaminidase [Sesamum indicum]                                             |
| c45430.graph_c0 | 0             | 0             | 0             | 3.74681775     | 4.15189447     | 8.06034616     | 2.752E-06 | Inf      | up        | predicted protein [Bathycoccus prasinos]                                                               |
| c45432.graph_c1 | 0.48075456    | 0.54139046    | 0.23167074    | 3.53777264     | 3.43089011     | 3.5639427      | 6.002E-06 | 1.98849  | up        | PREDICTED: charged multivesicular body protein 5-like [Nelumbo nucifera]                               |
| c45434.graph_c1 | 6.8795423     | 6.88643112    | 5.82668279    | 3.18182562     | 3.7450176      | 3.70906247     | 4.212E-15 | -1.96957 | down      | -                                                                                                      |
| c45437.graph_c1 | 42.9840523    | 37.8407927    | 41.0880952    | 37.9872675     | 39.0054041     | 39.2480729     | 4.898E-38 | -1.15896 | down      | PREDICTED: rop guanine nucleotide exchange factor 1 [Sesamum indicum]                                  |
| c45443.graph_c2 | 1.59609211    | 1.71751713    | 1.48700512    | 0.66701756     | 0.81173408     | 0.85191791     | 5.754E-10 | -2.13136 | down      | PREDICTED: protein IQ-DOMAIN 1-like isoform X1 [Sesamum indicum]                                       |
| c45444.graph_c0 | 2.29272264    | 0.8980507     | 1.47311968    | 0              | 0              | 0              | 5.715E-11 | -Inf     | down      | PREDICTED: malate dehydrogenase-like [Musa acuminata subsp. malaccensis]                               |
| c45449.graph_c0 | 447.950348    | 445.741815    | 402.582816    | 132.15183      | 146.016468     | 137.15944      | 1.46E-195 | -2.73137 | down      | PREDICTED: putative DNA-binding protein ESCAROLA [Sesamum indicum]                                     |
| c45449.graph_c1 | 13.869955     | 16.3972981    | 14.7504341    | 0.43450876     | 0.2353924      | 0.70911121     | 2.179E-86 | -6.11533 | down      | -                                                                                                      |
| c45449.graph_c2 | 1.92429955    | 1.85353865    | 1.58632524    | 10.1594223     | 9.8163075      | 9.92647428     | 1.421E-11 | 1.39069  | up        | PREDICTED: protein IQ-DOMAIN 1-like [Sesamum indicum]                                                  |
| c45449.graph_c4 | 23.8629523    | 24.3710403    | 19.890706     | 0.35155654     | 0.10580753     | 1.91244846     | 1.668E-94 | -5.92299 | down      | -                                                                                                      |
| c45455.graph_c0 | 141.868009    | 146.577644    | 140.608988    | 151.547902     | 149.567173     | 154.768656     | 2.112E-35 | -1.00269 | down      | PREDICTED: 3-ketoacyl-CoA synthase 11 [Sesamum indicum]                                                |
| c45461.graph_c0 | 0.16278119    | 0.10184012    | 0.20918028    | 4.36262343     | 4.37967829     | 3.55986509     | 3.929E-29 | 3.60192  | up        | PREDICTED: putative pentatricopeptide repeat-containing protein At4g17915 [Sesamum indicum]            |
| c45462.graph_c0 | 2.43419505    | 0.82470639    | 0.86622563    | 0              | 0              | 0              | 1.51E-06  | -Inf     | down      | PREDICTED: serine hydroxymethyltransferase, mitochondrial [Musa acuminata subsp. malaccensis]          |
| c45464.graph_c1 | 7.50119927    | 9.49017588    | 7.22950354    | 7.42054421     | 7.99904607     | 8.52657429     | 3.722E-06 | -1.1054  | down      | f-box family protein, partial [Galium verum var. asiaticum]                                            |
| c45467.graph_c1 | 0.19285497    | 0             | 0.24782627    | 6.5177134      | 5.82160578     | 7.14838832     | 5.576E-15 | 4.3681   | up        | hypothetical protein MIMGU_mgv1a008026mg [Erythranthe outtata]                                         |

| #ID             | 0 h-1<br>FPKM | 0 h-2<br>FPKM | 0 h-3<br>FPKM | 28 h-1<br>FPKM | 28 h-2<br>FPKM | 28 h-3<br>FPKM | FDR       | log2FC   | regulated | nr_annotation                                                                                        |
|-----------------|---------------|---------------|---------------|----------------|----------------|----------------|-----------|----------|-----------|------------------------------------------------------------------------------------------------------|
| c45471.graph_c0 | 0.27334174    | 0.43778472    | 0.84301189    | 3.93353136     | 4.69960517     | 4.92806949     | 3.784E-08 | 2.02152  | up        | PREDICTED: mitochondrial thiamine pyrophosphate carrier-like isoform X2 [Sesamum indicum]            |
| c45473.graph_c0 | 5.55256967    | 4.16859729    | 4.21179242    | 115.686501     | 117.687949     | 114.843262     | 6.75E-268 | 3.55576  | up        | PREDICTED: peroxisomal (S)-2-hydroxy-acid oxidase GLO5 [Musa acuminata subsp. malaccensis]           |
| c45475.graph_c0 | 4.18825973    | 3.67379958    | 4.21688709    | 2.98124009     | 3.31513992     | 3.25209243     | 5.625E-10 | -1.43011 | down      | PREDICTED: probable carboxylesterase 18 [Sesamum indicum]                                            |
| c45476.graph_c1 | 2.13410973    | 2.00391285    | 1.71097604    | 13.2114509     | 12.9511616     | 12.0236863     | 8.505E-54 | 1.61857  | up        | PREDICTED: nuclear pore complex protein NUP205 isoform X2 [Sesamum indicum]                          |
| c45479.graph_c0 | 3.84863039    | 3.91778055    | 4.06548572    | 16.5696314     | 17.8716562     | 16.0546032     | 8.461E-13 | 1.00185  | up        | PREDICTED: reticulon-like protein B17 [Sesamum indicum]                                              |
| c45485.graph_c0 | 7.92041863    | 7.92834973    | 8.56445799    | 7.61685165     | 6.94068817     | 8.82170016     | 8.942E-12 | -1.15301 | down      | PREDICTED: phospholipase A1-II 1-like [Sesamum indicum]                                              |
| c45487.graph_c2 | 2.27426744    | 2.07858436    | 2.28719246    | 0.28746512     | 0.06488851     | 0.35185379     | 4.436E-19 | -4.32356 | down      | unnamed protein product [Coffea canephora]                                                           |
| c45501.graph_c0 | 12.3552923    | 12.8230627    | 12.4923995    | 12.112228      | 13.355999      | 12.8087617     | 1.103E-25 | -1.06761 | down      | PREDICTED: probable serine/threonine-protein kinase At1g18390 [Sesamum indicum]                      |
| c45502.graph_c0 | 14.1513631    | 13.5775303    | 13.4272092    | 13.1054539     | 13.5968484     | 13.3331199     | 6.719E-35 | -1.12984 | down      | PREDICTED: uncharacterized protein LOC105163310 [Sesamum indicum]                                    |
| c45503.graph_c0 | 0             | 0             | 0.11497538    | 3.1213399      | 5.34298399     | 9.12670652     | 2.411E-05 | 6.13086  | up        | 40s ribosomal protein s22 [Lichtheimia corymbifera]                                                  |
| c45506.graph_c0 | 14.9035417    | 13.3850899    | 14.4765082    | 12.5018086     | 11.7277517     | 12.8889342     | 3.911E-32 | -1.2944  | down      | IMRC-FSI1-96821<br>hypothetical protein MIMGU_mgv1a011651mg [Erythranthe outtata]                    |
| c45510.graph_c0 | 28.3430575    | 30.8218336    | 33.9205475    | 7.22378289     | 7.49011359     | 6.97900473     | 6.477E-48 | -3.19434 | down      | PREDICTED: 26.5 kDa heat shock protein, mitochondrial [Sesamum indicum]                              |
| c45512.graph_c0 | 3.51025659    | 2.83804627    | 2.77588843    | 2.84560744     | 1.94913682     | 1.96168326     | 8.497E-07 | -1.52197 | down      | hypothetical protein MIMGU_mgv1a0008/4mg [Erythranthe outtata]                                       |
| c45512.graph_c1 | 1.29201339    | 1.27583002    | 0.83014418    | 1.29433573     | 0.84785414     | 0.91120324     | 6.705E-05 | -1.23975 | down      | PREDICTED: LOW QUALITY PROTEIN: putative E3 ubiquitin-protein ligase LIN [Sesamum indicum]           |
| c45515.graph_c0 | 20.157587     | 20.672009     | 19.7516091    | 6.00682742     | 6.3533623      | 6.65843135     | 1.76E-181 | -2.76135 | down      | PREDICTED: V-type proton ATPase subunit a5-like [Sesamum indicum]                                    |
| c45519.graph_c0 | 1.17599104    | 1.37336338    | 0.37779876    | 4.84331987     | 4.69461255     | 6.65465491     | 0.0030213 | 1.39051  | up        | predicted protein [Arabidopsis lyrata subsp. lyrata]                                                 |
| c45522.graph_c1 | 41.8510652    | 41.5023623    | 49.743621     | 4.73627773     | 5.45434932     | 5.87814398     | 4.77E-54  | -4.14252 | down      | PREDICTED: G-type lectin S-receptor-like serine/threonine-protein kinase At4g27290 [Sesamum indicum] |
| c45525.graph_c0 | 31.5596968    | 24.7218889    | 26.0970026    | 20.0376073     | 22.7787412     | 20.160125      | 3.264E-17 | -1.47648 | down      | PREDICTED: MATE efflux family protein 5 [Sesamum indicum]                                            |
| c45528.graph_c0 | 0.47557095    | 0.38348244    | 0.54322444    | 7.46971255     | 7.27325658     | 7.14504459     | 3.122E-59 | 2.8711   | up        | PREDICTED: uncharacterized protein LOC105168379 [Sesamum indicum]                                    |
| c45530.graph_c0 | 1.90536193    | 1.21371718    | 2.00328997    | 46.3280576     | 38.1925104     | 42.4260048     | 4.963E-34 | 3.53895  | up        | hypothetical protein AM11K_s00028p00129850 [Amborella trichonoda]                                    |
| c45532.graph_c0 | 9.32956503    | 8.22229871    | 8.81789372    | 3.02182215     | 3.28297941     | 3.0872395      | 6.106E-63 | -2.57969 | down      | PREDICTED: uncharacterized protein LOC105175116 [Sesamum indicum]                                    |
| c45533.graph_c0 | 39.4281412    | 40.4786158    | 33.0831234    | 21.1956664     | 20.5715931     | 20.7453738     | 5.625E-46 | -1.94219 | down      | PREDICTED: uncharacterized protein LOC105157181 [Sesamum indicum]                                    |
| c45537.graph_c0 | 7.27823661    | 8.4512086     | 7.29520131    | 36.8697695     | 36.5377445     | 36.6463856     | 1.815E-15 | 1.16683  | up        | PREDICTED: DNA polymerase epsilon subunit 3 [Sesamum indicum]                                        |

| #ID             | 0 h-1<br>FPKM | 0 h-2<br>FPKM | 0 h-3<br>FPKM | 28 h-1<br>FPKM | 28 h-2<br>FPKM | 28 h-3<br>FPKM | FDR       | log2FC   | regulated | nr_annotation                                                                                 |
|-----------------|---------------|---------------|---------------|----------------|----------------|----------------|-----------|----------|-----------|-----------------------------------------------------------------------------------------------|
| c45541.graph_c0 | 0.11651871    | 0.19439231    | 0.14973116    | 49.1173744     | 41.4937753     | 48.7171731     | 2.21E-124 | 7.14918  | up        | PREDICTED: WAT1-related protein At1g09380 [Sesamum indicum]                                   |
| c45543.graph_c0 | 1.50325583    | 0.77832471    | 0.46628286    | 11.7167392     | 13.2664167     | 12.542738      | 5.371E-24 | 2.69374  | up        | PREDICTED: protein SCARECROW [Sesamum indicum]                                                |
| c45543.graph_c1 | 69.7189926    | 72.7736629    | 75.1767135    | 37.1521188     | 35.4084844     | 44.1263683     | 6.711E-71 | -1.98992 | down      | -                                                                                             |
| c45543.graph_c2 | 146.990011    | 142.961081    | 135.276899    | 135.710438     | 129.710402     | 133.222631     | 7.983E-49 | -1.1826  | down      | PREDICTED: E3 ubiquitin-protein ligase UPL5 [Sesamum indicum]                                 |
| c45544.graph_c0 | 25.022116     | 23.3852742    | 25.6524122    | 13.7615487     | 13.1257755     | 14.9802296     | 5.453E-74 | -1.91338 | down      | PREDICTED: F-box protein FBW2 [Sesamum indicum]                                               |
| c45550.graph_c0 | 55.5144229    | 56.6075405    | 62.3876542    | 56.9204972     | 55.3932895     | 55.1999755     | 4.323E-20 | -1.15116 | down      | PREDICTED: uncharacterized protein LOC104114664 [Nicotiana tomentosiformis]                   |
| c45551.graph_c0 | 0.20950179    | 0.29958796    | 0.23075837    | 2.37097879     | 2.02293091     | 2.04119654     | 5.528E-07 | 2.02984  | up        | hypothetical protein CICLE_v10013877mg [Citrus clementina]                                    |
| c45552.graph_c0 | 2.02343353    | 1.56060009    | 1.87554847    | 10.4630984     | 9.88255156     | 9.81650607     | 1.034E-12 | 1.37555  | up        | PREDICTED: probable anion transporter 6, chloroplastic isoform X2 [Sesamum indicum]           |
| c45554.graph_c0 | 48.8193415    | 51.1306446    | 46.7025634    | 31.9334545     | 33.2231123     | 32.8130702     | 1.881E-57 | -1.67183 | down      | PREDICTED: protein polybromo-1-like [Sesamum indicum]                                         |
| c45554.graph_c1 | 58.8663967    | 59.2507585    | 57.8107582    | 40.3846686     | 38.9251064     | 37.9811281     | 5.735E-94 | -1.67535 | down      | PREDICTED: vacuolar protein 8 [Sesamum indicum]                                               |
| c45555.graph_c0 | 17.85357      | 16.570461     | 14.635761     | 12.4289959     | 12.0751066     | 10.6693411     | 1.176E-43 | -1.56882 | down      | PREDICTED: abscisic acid &#x2013;hydroxylase 3-like [Solanum lycopersicum]                    |
| c45556.graph_c0 | 39.062434     | 40.5698522    | 39.8705807    | 31.5422603     | 30.6141121     | 31.8843868     | 3.385E-63 | -1.43625 | down      | PREDICTED: granule-bound starch synthase 1, chloroplastic/amyloplastic [Sesamum indicum]      |
| c45559.graph_c0 | 6.60479391    | 6.89475365    | 6.09275627    | 6.99476096     | 6.34657221     | 6.47708383     | 4.792E-17 | -1.07287 | down      | PREDICTED: uncharacterized protein LOC105170176 [Sesamum indicum]                             |
| c45560.graph_c0 | 7.42109233    | 6.20120216    | 7.46326757    | 2.90785776     | 2.49848149     | 3.06166217     | 6.426E-25 | -2.40656 | down      | PREDICTED: uncharacterized protein LOC105171076 [Sesamum indicum]                             |
| c45565.graph_c0 | 48.0017798    | 43.8730288    | 46.695901     | 41.1437504     | 41.5473156     | 41.2890955     | 3.243E-50 | -1.25096 | down      | hypothetical protein MIMGU_mgv1a00385/mg [Erythranthe guttata]                                |
| c45566.graph_c0 | 74.0480001    | 73.2147613    | 76.4440263    | 26.3392219     | 28.3300178     | 25.9277466     | 5.87E-208 | -2.56414 | down      | hypothetical protein MIMGU_mgv1a020815mg [Erythranthe guttata]                                |
| c45569.graph_c0 | 20.3805894    | 19.7634663    | 29.4635973    | 3.00878803     | 2.2987068      | 1.51085936     | 3.959E-15 | -4.44975 | down      | -                                                                                             |
| c45569.graph_c1 | 0             | 0.0523539     | 0.06720954    | 2.31875947     | 1.75040561     | 1.55089245     | 1.885E-11 | 4.44464  | up        | -                                                                                             |
| c45569.graph_c3 | 74.1422938    | 70.1946862    | 68.5655201    | 67.1241291     | 65.036294      | 65.5112485     | 1.836E-46 | -1.19676 | down      | PREDICTED: putative glycerol-3-phosphate transporter 1 [Eucalyptus grandis]                   |
| c45574.graph_c0 | 1.04175747    | 0.82704878    | 0.73859288    | 4.12512569     | 4.57324517     | 4.72953982     | 1.637E-05 | 1.27827  | up        | PREDICTED: probable lipid-A-disaccharide synthase, mitochondrial isoform X1 [Sesamum indicum] |
| c45580.graph_c1 | 1.45148261    | 0.72646802    | 1.17802902    | 19.5994739     | 18.6991212     | 17.0123952     | 3.723E-53 | 2.95306  | up        | PREDICTED: ABC transporter G family member 15-like isoform X2 [Sesamum indicum]               |
| c45581.graph_c0 | 1.04783714    | 1.16875912    | 0.8463791     | 3.82956889     | 4.81333354     | 5.06020243     | 4.959E-05 | 1.07452  | up        | hypothetical protein MIMGU_mgv1a001682mg [Erythranthe guttata]                                |
| c45588.graph_c0 | 9.91802783    | 11.5826191    | 10.0898379    | 46.8972824     | 44.8232693     | 43.5545678     | 3.58E-17  | 1.00783  | up        | PREDICTED: probable receptor-like protein kinase At5g56460 [Sesamum indicum]                  |
| c45590.graph_c0 | 1.87274859    | 1.79311848    | 2.5635054     | 15.327202      | 13.6252962     | 15.9353964     | 7.562E-22 | 1.75463  | up        | hypothetical protein MIMGU_mgv1a0148/1mg [Erythranthe guttata]                                |

| #ID             | 0 h-1<br>FPKM | 0 h-2<br>FPKM | 0 h-3<br>FPKM | 28 h-1<br>FPKM | 28 h-2<br>FPKM | 28 h-3<br>FPKM | FDR       | log2FC   | regulated | nr_annotation                                                                                             |
|-----------------|---------------|---------------|---------------|----------------|----------------|----------------|-----------|----------|-----------|-----------------------------------------------------------------------------------------------------------|
| c45594.graph_c0 | 0.13529975    | 0.47402332    | 0.43466384    | 3.44172777     | 2.79680174     | 4.53359512     | 8.759E-06 | 2.27001  | up        | hypothetical protein MIMGU_mgv1a011617/mg [Erythranthe<br>cattata]                                        |
| c45596.graph_c0 | 46.0805474    | 47.9573992    | 43.8239507    | 36.4753005     | 33.5456223     | 34.7826236     | 7.274E-76 | -1.48526 | down      | PREDICTED: scarecrow-like protein 13 [Sesamum indicum]                                                    |
| c45602.graph_c0 | 1.74774985    | 0.78899018    | 2.28996556    | 6.97394639     | 6.99396761     | 7.43853603     | 0.0005814 | 1.05243  | up        | PREDICTED: probable alpha-mannosidase I MNS5 isoform X1<br>[Sesamum indicum]                              |
| c45604.graph_c0 | 6.03702796    | 6.08670543    | 5.09719577    | 516.367822     | 456.263217     | 440.222867     | 4.49E-209 | 5.26962  | up        | PREDICTED: glucose-6-phosphate 1-dehydrogenase, chloroplast-<br>like [Sesamum indicum]                    |
| c45606.graph_c0 | 1.02930215    | 1.03033284    | 1.20767714    | 0.71556518     | 0.73419121     | 0.55735465     | 4.211E-06 | -1.79695 | down      | hypothetical protein VITISV_002159 [Vitis vinifera]                                                       |
| c45611.graph_c0 | 12.4630261    | 12.1824571    | 14.2419554    | 59.059738      | 57.3323588     | 58.5847284     | 1.388E-29 | 1.0774   | up        | PREDICTED: AP-4 complex subunit mu [Sesamum indicum]                                                      |
| c45616.graph_c0 | 2.02221232    | 2.14331003    | 3.21006357    | 0.30259194     | 0.35127276     | 0.59964476     | 2.288E-09 | -3.65062 | down      | PREDICTED: ia-related protein oc-like isoform X1 [Sesamum<br>indicum]                                     |
| c45617.graph_c0 | 20.7012453    | 19.3619831    | 17.5508348    | 14.0061298     | 14.7343737     | 14.863915      | 1.423E-47 | -1.49039 | down      | PREDICTED: uncharacterized protein LOC105158248 [Sesamum<br>indicum]                                      |
| c45623.graph_c0 | 2.73168274    | 2.11783363    | 1.27335155    | 0              | 0              | 0              | 4.707E-20 | -Inf     | down      | --                                                                                                        |
| c45625.graph_c0 | 19.6003543    | 20.1151225    | 20.7377519    | 16.2526662     | 14.985709      | 15.7922207     | 1.916E-59 | -1.45332 | down      | PREDICTED: protein VACUOLELESS1 [Sesamum indicum]                                                         |
| c45627.graph_c0 | 2.71028197    | 1.84096151    | 1.74140982    | 1.96981732     | 1.96912039     | 1.60735485     | 0.000727  | -1.26867 | down      | -                                                                                                         |
| c45628.graph_c0 | 26.5138553    | 27.8998425    | 21.3986359    | 23.9130158     | 22.1602128     | 23.394326      | 5.105E-14 | -1.21362 | down      | PREDICTED: E3 ubiquitin-protein ligase UPL2-like [Sesamum<br>indicum]                                     |
| c45629.graph_c0 | 2.20137795    | 1.40227965    | 1.80018225    | 1.59994881     | 1.57593138     | 1.7209459      | 0.0021729 | -1.23061 | down      | -                                                                                                         |
| c45632.graph_c0 | 0             | 0.04848218    | 0.1867176     | 2.28808596     | 2.06592709     | 1.3787516      | 2.821E-08 | 3.48506  | up        | PREDICTED: probable protein phosphatase 2C 14 [Sesamum<br>indicum]                                        |
| c45632.graph_c1 | 0.34123575    | 0.38176303    | 0.23214783    | 5.28111528     | 5.7035812      | 5.21407172     | 1.214E-30 | 2.99812  | up        | PREDICTED: protein-tyrosine-phosphatase MKP1-like isoform X1<br>[Sesamum indicum]                         |
| c45637.graph_c0 | 56.9376088    | 54.8948213    | 57.735979     | 46.5157739     | 44.2047013     | 44.3672034     | 3.706E-68 | -1.41888 | down      | PREDICTED: activator of 90 kDa heat shock protein ATPase<br>homolog [Sesamum indicum]                     |
| c45639.graph_c0 | 15.0454639    | 15.0247564    | 14.6956897    | 68.6486694     | 65.8763237     | 67.2921653     | 2.573E-33 | 1.08238  | up        | PREDICTED: dolichyl-diphosphooligosaccharide--protein<br>glycosyltransferase subunit 1A [Sesamum indicum] |
| c45641.graph_c0 | 26.0770213    | 29.771682     | 27.8948148    | 17.8257157     | 17.6674451     | 17.7222722     | 1.113E-26 | -1.74516 | down      | PREDICTED: F-box protein PP2-A15-like [Nicotiana glauca]                                                  |
| c45642.graph_c0 | 95.6197768    | 98.4392499    | 91.0526769    | 48.6011875     | 46.263107      | 47.4822258     | 1.3E-144  | -2.09189 | down      | PREDICTED: uncharacterized protein LOC105169167 [Sesamum<br>indicum]                                      |
| c45653.graph_c0 | 3.32709187    | 2.65350812    | 2.50269939    | 3.1455105      | 2.59159222     | 2.63087866     | 5.15E-08  | -1.10732 | down      | PREDICTED: integrator complex subunit 9 homolog isoform X2<br>[Sesamum indicum]                           |
| c45660.graph_c0 | 30.8114009    | 29.6885536    | 28.3871262    | 27.0844665     | 26.9758404     | 28.2980141     | 4.423E-39 | -1.1994  | down      | PREDICTED: uncharacterized protein LOC105168018 [Sesamum<br>indicum]                                      |
| c45661.graph_c0 | 0.12640267    | 0.06326462    | 0.08121622    | 3.53694625     | 3.38707817     | 3.47333833     | 1.276E-27 | 4.17655  | up        | PREDICTED: chaperonin 60 subunit beta 4, chloroplastic isoform<br>X1 [Sesamum indicum]                    |
| c45662.graph_c1 | 399.967544    | 413.856287    | 388.466041    | 259.760579     | 254.038665     | 256.61738      | 7.079E-74 | -1.73212 | down      | PREDICTED: glucan endo-1,3-beta-glucosidase-like [Sesamum<br>indicum]                                     |

| #ID             | 0 h-1<br>FPKM | 0 h-2<br>FPKM | 0 h-3<br>FPKM | 28 h-1<br>FPKM | 28 h-2<br>FPKM | 28 h-3<br>FPKM | FDR       | log2FC   | regulated | nr_annotation                                                                                                  |
|-----------------|---------------|---------------|---------------|----------------|----------------|----------------|-----------|----------|-----------|----------------------------------------------------------------------------------------------------------------|
| c45663.graph_c0 | 31.8507435    | 34.345873     | 32.695842     | 27.2995479     | 25.8219655     | 27.8521441     | 1.487E-60 | -1.3788  | down      | PREDICTED: uncharacterized protein LOC105167456 isoform X2 [Sesamum indicum]                                   |
| c45665.graph_c0 | 3.44833649    | 3.29488996    | 2.25590854    | 2.36952758     | 2.69489829     | 2.34252797     | 5.436E-07 | -1.36676 | down      | hypothetical protein MIMGU_mgv1a015251mg [Erythranthe                                                          |
| c45667.graph_c0 | 21.9553657    | 21.9371727    | 19.3935674    | 20.5370227     | 19.5307371     | 21.1736919     | 2.702E-40 | -1.13599 | down      | hypothetical protein MIMGU_mgv1a002105mg [Erythranthe                                                          |
| c45668.graph_c0 | 128.196915    | 135.435528    | 121.037185    | 684.811085     | 690.027084     | 683.676976     | 2.563E-60 | 1.33024  | up        | triosephosphate isomerase, putative [Ricinus communis]                                                         |
| c45669.graph_c0 | 1.03052518    | 1.22993345    | 1.27333236    | 8.06593586     | 7.93303238     | 7.54549225     | 2.846E-11 | 1.64303  | up        | PREDICTED: uncharacterized protein LOC105168837 isoform X1 [Sesamum indicum]                                   |
| c45670.graph_c0 | 5.29637586    | 6.05015177    | 4.62411226    | 26.2210398     | 25.3413961     | 24.2508227     | 6.38E-34  | 1.15833  | up        | PREDICTED: RRP12-like protein isoform X1 [Sesamum indicum]                                                     |
| c45672.graph_c0 | 1.36223194    | 1.16473826    | 1.45876831    | 8.43615604     | 7.98953021     | 7.5234083      | 1.586E-13 | 1.49473  | up        | PREDICTED: alpha-1,3-mannosyl-glycoprotein 2-beta-N-acetylglucosaminyltransferase isoform X1 [Sesamum indicum] |
| c45673.graph_c0 | 66.7131895    | 59.4534997    | 68.8247622    | 3.70210263     | 3.42378389     | 7.28825291     | 1.53E-136 | -4.8454  | down      | PREDICTED: probable galactinol--sucrose galactosyltransferase 2-like isoform X1 [Citrus sinensis]              |
| c45676.graph_c0 | 4.53732006    | 4.07694834    | 4.49923087    | 23.7330397     | 24.6406716     | 24.9808256     | 9.914E-27 | 1.39321  | up        | PREDICTED: GABA transporter 1 [Sesamum indicum]                                                                |
| c45681.graph_c1 | 2.10616574    | 2.55506145    | 2.04332269    | 30.5136084     | 30.223642      | 29.4153918     | 4.65E-153 | 2.65943  | up        | PREDICTED: uncharacterized protein LOC105164103 [Sesamum indicum]                                              |
| c45682.graph_c0 | 21.3627598    | 23.4535854    | 21.6121612    | 17.4349729     | 17.0621395     | 18.0044074     | 3.254E-62 | -1.42964 | down      | PREDICTED: GTPase-activating protein gyp7 isoform X3 [Sesamum indicum]                                         |
| c45685.graph_c0 | 1.67522936    | 1.36304728    | 1.43899469    | 8.34703373     | 7.2250138      | 7.5230372      | 1.152E-25 | 1.27782  | up        | PREDICTED: probable receptor-like serine/threonine-protein kinase At5g57670 [Sesamum indicum]                  |
| c45687.graph_c1 | 2.19069896    | 1.5049263     | 1.8767566     | 10.2399502     | 8.00543611     | 9.29828124     | 6.573E-08 | 1.21629  | up        | PREDICTED: uncharacterized protein LOC105177833 [Sesamum indicum]                                              |
| c45690.graph_c0 | 0.63286126    | 0.72087359    | 0.4767338     | 3.87000754     | 4.23893104     | 4.72389964     | 1.714E-11 | 1.72354  | up        | PREDICTED: U-box domain-containing protein 55 [Sesamum indicum]                                                |
| c45693.graph_c1 | 20.7942628    | 21.3227701    | 17.4785544    | 13.3371039     | 12.435491      | 13.2892522     | 1.268E-40 | -1.69747 | down      | PREDICTED: abl interactor 2-like isoform X1 [Sesamum indicum]                                                  |
| c45697.graph_c0 | 13.8478987    | 13.023352     | 12.0547438    | 8.72533541     | 9.14232962     | 8.75901277     | 2.071E-50 | -1.63688 | down      | PREDICTED: uncharacterized protein LOC105177954 [Sesamum indicum]                                              |
| c45699.graph_c0 | 0             | 0             | 0             | 3.19760091     | 6.23620905     | 8.61041357     | 3.178E-07 | Inf      | up        | 60s ribosomal protein l9 [Pfiesteria piscicida]                                                                |
| c45702.graph_c0 | 43.5171089    | 44.6480028    | 47.3716316    | 30.7398346     | 27.8888411     | 29.8344132     | 2.862E-55 | -1.70698 | down      | PREDICTED: uncharacterized protein LOC105178309 [Sesamum indicum]                                              |
| c45702.graph_c1 | 12.4147356    | 12.8182317    | 14.0568655    | 0.82026893     | 0.48425542     | 0.51487135     | 7.66E-140 | -5.52535 | down      | PREDICTED: uncharacterized protein LOC105162982 [Sesamum indicum]                                              |
| c45705.graph_c0 | 3.49376546    | 3.72208805    | 3.27101392    | 19.5884892     | 20.6179543     | 17.8932529     | 2.012E-28 | 1.37985  | up        | PREDICTED: tyrosine-sulfated glycopeptide receptor 1 [Sesamum indicum]                                         |
| c45711.graph_c0 | 0.19728714    | 0.19748469    | 0.38028268    | 2.15080735     | 2.71876833     | 1.93054536     | 1.415E-05 | 2.03189  | up        | hypothetical protein VITISV_029424 [Vitis vinifera]                                                            |
| c45712.graph_c0 | 98.326615     | 99.7086369    | 95.5472928    | 60.4013432     | 59.4392035     | 62.2149219     | 5.69E-102 | -1.77932 | down      | PREDICTED: plastidial pyruvate kinase 2-like [Sesamum indicum]                                                 |



| #ID             | 0 h-1<br>FPKM | 0 h-2<br>FPKM | 0 h-3<br>FPKM | 28 h-1<br>FPKM | 28 h-2<br>FPKM | 28 h-3<br>FPKM | FDR       | log2FC   | regulated | nr_annotation                                                                                          |
|-----------------|---------------|---------------|---------------|----------------|----------------|----------------|-----------|----------|-----------|--------------------------------------------------------------------------------------------------------|
| c45713.graph_c0 | 1.42197674    | 1.49457067    | 2.13184582    | 10.8860368     | 10.6066869     | 10.8365966     | 3.232E-23 | 1.58295  | up        | PREDICTED: probable sodium/metabolite cotransporter BASS2, chloroplastic isoform X2 [Sesamum indicum]  |
| c45720.graph_c0 | 1.18509867    | 1.54217098    | 0.91373923    | 11.0033999     | 11.8209459     | 10.876332      | 2.105E-27 | 2.12339  | up        | PREDICTED: serine/threonine-protein kinase BLUS1-like isoform X4 [Sesamum indicum]                     |
| c45721.graph_c0 | 9.089999      | 7.71155503    | 9.00910634    | 8.52459211     | 9.16631702     | 8.69499694     | 9.957E-16 | -1.05924 | down      | hypothetical protein MIMGU_mgv1a008/94mg [Erythranthe guttata]                                         |
| c45722.graph_c0 | 1.97190877    | 2.20163911    | 1.31572082    | 17.6941612     | 17.9918533     | 17.137037      | 3.613E-34 | 2.18091  | up        | hypothetical protein MIMGU_mgv1a00/0/9mg [Erythranthe guttata]                                         |
| c45729.graph_c0 | 9.08714367    | 3.88254277    | 4.12979076    | 0              | 0              | 0              | 2.295E-10 | -Inf     | down      | chaperone [Agave tequilana]                                                                            |
| c45742.graph_c0 | 0.60578347    | 0.92081455    | 0.86495083    | 7.89242552     | 9.14322455     | 8.22317283     | 2.227E-31 | 2.30673  | up        | PREDICTED: DNA replication licensing factor MCM5 [Sesamum indicum]                                     |
| c45743.graph_c0 | 14.1836219    | 14.3529922    | 17.0313344    | 16.1106686     | 13.783499      | 15.9960439     | 1.376E-08 | -1.08239 | down      | PREDICTED: WAI1-related protein At5g28050-like [Sesamum indicum]                                       |
| c45745.graph_c0 | 67.853071     | 65.2664207    | 65.8360819    | 376.011944     | 340.073621     | 393.405513     | 1.116E-34 | 1.38967  | up        | PREDICTED: alpha-galactosidase [Sesamum indicum]                                                       |
| c45745.graph_c1 | 6.0229221     | 4.93277985    | 5.11041954    | 3.92711579     | 4.75612302     | 4.04193563     | 7.949E-23 | -1.42572 | down      | PREDICTED: CSC1-like protein ERD4 [Sesamum indicum]                                                    |
| c45746.graph_c0 | 1.89722416    | 1.76347223    | 1.69789854    | 18.9597593     | 21.2985608     | 18.6254872     | 3.323E-48 | 2.36819  | up        | PREDICTED: LOW QUALITY PROTEIN: uncharacterized protein LOC105161466 [Sesamum indicum]                 |
| c45747.graph_c0 | 7.71565169    | 6.6859091     | 6.75792911    | 38.026284      | 36.7776133     | 36.8115296     | 4.503E-31 | 1.30995  | up        | hypothetical protein CISIN_1g034493mg [Citrus sinensis]                                                |
| c45752.graph_c0 | 0             | 0             | 0             | 3.09563284     | 4.28276275     | 7.94471239     | 1.368E-06 | Inf      | up        | PREDICTED: 60S ribosomal protein L6-3-like isoform X2 [Cicer arietinum]                                |
| c45753.graph_c0 | 3.12808951    | 3.46585621    | 3.22191207    | 2.62057322     | 2.36613192     | 2.77562784     | 3.857E-14 | -1.42864 | down      | PREDICTED: phosphatidylinositol/phosphatidylcholine transfer protein SFH9 isoform X1 [Sesamum indicum] |
| c45754.graph_c1 | 5.05019401    | 4.27204311    | 3.19914752    | 1.60259167     | 1.9604381      | 2.40448381     | 7.568E-11 | -2.153   | down      | PREDICTED: uncharacterized protein LOC105170987 isoform X2 [Sesamum indicum]                           |
| c45762.graph_c0 | 15.9583686    | 15.4761232    | 15.9499942    | 15.1254645     | 16.2902649     | 15.9766715     | 5.392E-26 | -1.09038 | down      | PREDICTED: caffeoylshikimate esterase-like [Sesamum indicum]                                           |
| c45764.graph_c0 | 1.22255414    | 0.99834549    | 1.36431593    | 5.30788903     | 4.70807633     | 5.62864432     | 2.583E-05 | 1.03352  | up        | PREDICTED: tRNA pseudouridine(38/39) synthase isoform X3 [Sesamum indicum]                             |
| c45766.graph_c0 | 60.1959704    | 53.9878771    | 53.1341736    | 40.7382224     | 39.6029438     | 41.488854      | 2.094E-79 | -1.54672 | down      | PREDICTED: uncharacterized protein DDB_G0286299-like [Sesamum indicum]                                 |
| c45772.graph_c0 | 11.7065894    | 10.960068     | 11.5922908    | 10.7104252     | 10.5742957     | 10.5773899     | 1.536E-12 | -1.19527 | down      | PREDICTED: diphthamide biosynthesis protein 3-like [Sesamum indicum]                                   |
| c45779.graph_c0 | 119.360801    | 115.23231     | 119.872952    | 39.2893376     | 39.9512052     | 41.7741503     | 3.3E-212  | -2.64093 | down      | hypothetical protein MIMGU_mgv1a025324mg, partial [Erythranthe guttata]                                |
| c45783.graph_c0 | 9.67954925    | 10.0095474    | 9.73158       | 6.18230842     | 5.72203344     | 6.61031382     | 7.475E-47 | -1.7581  | down      | PREDICTED: uncharacterized protein LOC105166430 [Sesamum indicum]                                      |
| c45785.graph_c0 | 0.30562976    | 0.24474864    | 0.47129561    | 16.2154863     | 16.646689      | 14.500498      | 2.494E-85 | 4.43656  | up        | hypothetical protein EUTSA_v10017458mg [Eutrema salsugineum]                                           |
| c45789.graph_c0 | 0.04423468    | 0             | 0             | 0.93233589     | 0.92889588     | 1.60025817     | 3.89E-06  | 5.23397  | up        | --                                                                                                     |
| c45791.graph_c1 | 3.03545884    | 2.47969409    | 2.15210196    | 11.9436613     | 11.0129661     | 11.1529858     | 5.805E-09 | 1.06678  | up        | PREDICTED: cyclic nucleotide-gated ion channel 1 [Sesamum indicum]                                     |

| #ID             | 0 h-1<br>FPKM | 0 h-2<br>FPKM | 0 h-3<br>FPKM | 28 h-1<br>FPKM | 28 h-2<br>FPKM | 28 h-3<br>FPKM | FDR       | log2FC   | regulated | nr_annotation                                                                                                                                         |
|-----------------|---------------|---------------|---------------|----------------|----------------|----------------|-----------|----------|-----------|-------------------------------------------------------------------------------------------------------------------------------------------------------|
| c45791.graph_c2 | 31.9947119    | 34.0797465    | 30.2208936    | 27.3776032     | 32.5704007     | 31.8678074     | 5.965E-28 | -1.1582  | down      | PREDICTED: uncharacterized protein LOC105178732 [Sesamum indicum]                                                                                     |
| c45792.graph_c0 | 42.7163756    | 42.7318448    | 41.1867016    | 37.390029      | 36.2657121     | 34.9424761     | 9.984E-57 | -1.31196 | down      | PREDICTED: probable protein phosphatase 2C 6U [Sesamum indicum]                                                                                       |
| c45800.graph_c0 | 332.182346    | 330.019441    | 328.140203    | 306.414521     | 325.105148     | 317.755064     | 4.255E-38 | -1.15153 | down      | PREDICTED: uncharacterized protein LOC105158790 isoform X1 [Sesamum indicum]                                                                          |
| c45801.graph_c0 | 60.3363111    | 58.3350719    | 63.5450575    | 60.6173789     | 58.7736226     | 62.7830093     | 2.354E-31 | -1.09142 | down      | PREDICTED: protein CPR-5 [Sesamum indicum]                                                                                                            |
| c45803.graph_c0 | 0.03215615    | 0             | 0             | 2.7343957      | 2.30008906     | 2.66986528     | 2.612E-20 | 6.84598  | up        | unnamed protein product [Vitis vinifera]                                                                                                              |
| c45804.graph_c2 | 38.3731817    | 40.2275865    | 35.2861276    | 24.830433      | 24.0005409     | 24.9179445     | 3.87E-100 | -1.7161  | down      | PREDICTED: putative SWI/SNF-related matrix-associated actin-dependent regulator of chromatin subfamily A member 3-like 2 isoform X2 [Sesamum indicum] |
| c45806.graph_c0 | 0.59181134    | 0.52658129    | 0.63375084    | 7.79004301     | 9.47173264     | 8.73546609     | 1.675E-28 | 2.79921  | up        | unnamed protein product [Coffea canephora]                                                                                                            |
| c45813.graph_c1 | 5.60474374    | 6.2478965     | 4.71970055    | 1.85158884     | 1.81112871     | 1.81305765     | 2.18E-35  | -2.68573 | down      | hypothetical protein MIMGU_mgv1a004624mg [Erythranthe outtata]                                                                                        |
| c45815.graph_c0 | 2.9933396     | 3.90431788    | 3.72999748    | 20.2391329     | 16.5478272     | 15.9232257     | 2.365E-07 | 1.2172   | up        | -                                                                                                                                                     |
| c45815.graph_c1 | 65.932923     | 64.2302848    | 66.1638823    | 466.377553     | 414.504467     | 389.035145     | 7.54E-36  | 1.60226  | up        | hypothetical protein MIMGU_mgv1a010458mg [Erythranthe outtata]                                                                                        |
| c45817.graph_c0 | 2.58666228    | 2.58925243    | 2.86862599    | 12.8250093     | 12.6261467     | 12.6085576     | 1.744E-11 | 1.1502   | up        | PREDICTED: LOW QUALITY PROTEIN: actin-related protein 2 [Tarenaya hassleriana]                                                                        |
| c45818.graph_c0 | 105.119902    | 102.011447    | 102.794686    | 28.1541854     | 29.4828378     | 27.4200857     | 0         | -2.95604 | down      | PREDICTED: uncharacterized protein LOC101291143 [Fragaria vesca subsp. vesca]                                                                         |
| c45819.graph_c2 | 1.674902      | 1.67657916    | 1.78682786    | 8.93458958     | 8.68923782     | 8.37757533     | 3.209E-10 | 1.24759  | up        | PREDICTED: uncharacterized protein LOC105166519 [Sesamum indicum]                                                                                     |
| c45820.graph_c0 | 4.25093441    | 7.36475379    | 6.72322341    | 4.27784488     | 4.61353311     | 6.10870135     | 0.0015978 | -1.38286 | down      | PREDICTED: probable polyamine transporter At3g13620 [Sesamum indicum]                                                                                 |
| c45820.graph_c2 | 44.53843      | 46.8490689    | 50.6713957    | 19.093105      | 18.3448089     | 17.7029192     | 6.789E-54 | -2.45766 | down      | PREDICTED: uncharacterized protein LOC105161926 [Sesamum indicum]                                                                                     |
| c45822.graph_c0 | 40.7677868    | 36.5746038    | 39.4935479    | 28.7467854     | 27.3139682     | 26.6594824     | 4.376E-67 | -1.58879 | down      | hypothetical protein EUGRSUZ_K00825 [Eucalyptus grandis]                                                                                              |
| c45825.graph_c1 | 31.9956587    | 30.4483204    | 29.4158319    | 31.6197784     | 33.6248194     | 31.4004944     | 1.462E-33 | -1.01655 | down      | hypothetical protein POPTR_0010s08110g [Populus trichocarpa]                                                                                          |
| c45829.graph_c0 | 48.0823459    | 50.3227045    | 47.5484003    | 39.7685635     | 39.6395825     | 37.5685156     | 2.998E-64 | -1.40981 | down      | PREDICTED: nucleobase-ascorbate transporter 3 [Sesamum indicum]                                                                                       |
| c45829.graph_c3 | 0.39198713    | 0.50448811    | 0.21587956    | 2.44194844     | 2.97654815     | 3.12175564     | 3.322E-05 | 1.85791  | up        | PREDICTED: uncharacterized protein LOC105167094 [Sesamum indicum]                                                                                     |
| c45831.graph_c0 | 128.125325    | 127.479651    | 134.797021    | 32.9680697     | 33.5513846     | 31.1814877     | 1.61E-193 | -3.09009 | down      | PREDICTED: uncharacterized protein LOC105166052 [Sesamum indicum]                                                                                     |
| c45832.graph_c1 | 52.6036305    | 56.1343713    | 57.7678654    | 43.0085704     | 43.8348258     | 41.6119904     | 2.345E-43 | -1.46613 | down      | PREDICTED: probable mitochondrial chaperone BCS1-B [Sesamum indicum]                                                                                  |
| c45833.graph_c0 | 0             | 0             | 0             | 2.25583801     | 6.5992651      | 5.1540871      | 1.139E-05 | Inf      | up        | 60S ribosomal protein L35a-4 [Auxenochlorella protothecoides]                                                                                         |

| #ID             | 0 h-1<br>FPKM | 0 h-2<br>FPKM | 0 h-3<br>FPKM | 28 h-1<br>FPKM | 28 h-2<br>FPKM | 28 h-3<br>FPKM | FDR       | log2FC   | regulated | nr_annotation                                                                                     |
|-----------------|---------------|---------------|---------------|----------------|----------------|----------------|-----------|----------|-----------|---------------------------------------------------------------------------------------------------|
| c45837.graph_c0 | 1.50607729    | 0.89512883    | 1.02816475    | 0              | 0              | 0              | 2.119E-21 | -Inf     | down      | hypothetical protein EMIHUDRAFT_61288, partial [Emiliania huxleyi CCMP1516]                       |
| c45838.graph_c0 | 33.8427139    | 36.1916321    | 35.2916565    | 31.0820352     | 29.9612454     | 31.7405054     | 3.429E-54 | -1.2736  | down      | PREDICTED: uncharacterized protein LOC105173340 isoform X4 [Sesamum indicum]                      |
| c45839.graph_c0 | 2.71880769    | 2.93212476    | 2.16281342    | 2.77582885     | 2.6868527      | 2.35143284     | 1.567E-09 | -1.08805 | down      | -                                                                                                 |
| c45840.graph_c0 | 1.72307764    | 1.14986869    | 1.19937078    | 8.37490937     | 10.7890503     | 10.410456      | 1.241E-13 | 1.77398  | up        | PREDICTED: uncharacterized protein LOC101257656 isoform X1 [Solanum lycopersicum]                 |
| c45842.graph_c0 | 11.2074837    | 11.7985495    | 11.9747467    | 52.7720812     | 55.4656602     | 52.2026527     | 9.071E-37 | 1.1059   | up        | PREDICTED: CTP synthase isoform X2 [Elaeis guineensis]                                            |
| c45844.graph_c0 | 113.01763     | 106.896536    | 109.187362    | 32.8255945     | 32.9725659     | 34.7280083     | 0         | -2.80095 | down      | PREDICTED: LOW QUALITY PROTEIN: uncharacterized protein LOC105169583 [Sesamum indicum]            |
| c45845.graph_c0 | 60.6352427    | 58.4281516    | 57.5669965    | 28.3491556     | 26.5643925     | 28.1394786     | 3.79E-155 | -2.17841 | down      | hypothetical protein MIMGU_mgv1a000962mg [Erythranthe outtata]                                    |
| c45846.graph_c0 | 0             | 0             | 0             | 3.92531617     | 2.50686785     | 6.56229705     | 2.984E-05 | Inf      | up        | --                                                                                                |
| c45850.graph_c0 | 126.036413    | 122.193321    | 116.101354    | 74.0889844     | 88.5133115     | 86.1434775     | 5.366E-89 | -1.64    | down      | PREDICTED: uncharacterized protein LOC105163078 [Sesamum indicum]                                 |
| c45851.graph_c0 | 2.19023645    | 2.01602725    | 2.26457286    | 2.04927974     | 1.93291048     | 2.46350235     | 2.881E-06 | -1.09576 | down      | -                                                                                                 |
| c45854.graph_c0 | 10.8414317    | 11.2759507    | 11.4632952    | 10.6716217     | 10.5968848     | 10.7353074     | 4.413E-22 | -1.16051 | down      | PREDICTED: uncharacterized protein LOC105159449 [Sesamum indicum]                                 |
| c45857.graph_c0 | 0.51056181    | 0.70763963    | 0.45421764    | 4.99521861     | 6.03080052     | 5.03101966     | 1.087E-11 | 2.17444  | up        | PREDICTED: protyl 3-hydroxylase 1 isoform X1 [Sesamum indicum]                                    |
| c45858.graph_c0 | 1.14398087    | 0.87881793    | 0.95724883    | 0.09667892     | 0.0698336      | 0.03155568     | 2.765E-28 | -5.00348 | down      | PREDICTED: putative ABC transporter B family member 8 [Sesamum indicum]                           |
| c45860.graph_c0 | 12.606571     | 12.7884175    | 11.7930619    | 11.8654617     | 11.0145157     | 11.5297433     | 9.953E-32 | -1.20155 | down      | PREDICTED: serine/threonine-protein kinase svkA-like isoform X2 [Sesamum indicum]                 |
| c45863.graph_c0 | 39.592594     | 38.1032184    | 37.1378365    | 33.4161898     | 32.5774022     | 31.9779745     | 8.696E-55 | -1.31904 | down      | hypothetical protein MIMGU_mgv1a004500mg [Erythranthe outtata]                                    |
| c45865.graph_c0 | 0.05673674    | 0.02839677    | 0             | 1.36078578     | 1.21004588     | 1.02626962     | 1.944E-11 | 4.33351  | up        | PREDICTED: type I inositol 1,4,5-trisphosphate 5-phosphatase CVP2-like [Sesamum indicum]          |
| c45867.graph_c0 | 50.7797155    | 52.3265368    | 48.8047738    | 51.8767567     | 51.0398702     | 50.0573344     | 1.1E-39   | -1.07999 | down      | PREDICTED: uncharacterized protein LOC105177822 isoform X2 [Sesamum indicum]                      |
| c45870.graph_c0 | 0.07286516    | 0.40115969    | 0.09363462    | 1.74761331     | 1.88873555     | 1.36121827     | 8.549E-05 | 2.04984  | up        | PREDICTED: kinesin-4-like isoform X2 [Sesamum indicum]                                            |
| c45871.graph_c0 | 0.24791215    | 0.1240802     | 0.31857693    | 2.16217349     | 1.34216496     | 1.3967501      | 0.0006792 | 1.73042  | up        | PREDICTED: pentatricopeptide repeat-containing protein At2g03880, mitochondrial [Sesamum indicum] |
| c45871.graph_c1 | 1.94439037    | 1.9014219     | 1.94123445    | 17.6755169     | 18.0106881     | 17.7405627     | 4.247E-76 | 2.11603  | up        | PREDICTED: pentatricopeptide repeat-containing protein At2g03880, mitochondrial [Sesamum indicum] |
| c45873.graph_c0 | 18.2166288    | 20.3047742    | 18.0692862    | 13.0536688     | 12.0964032     | 13.0576603     | 3.895E-63 | -1.65657 | down      | hypothetical protein PHAVU_004G031700g [Phaseolus vulgaris]                                       |
| c45879.graph_c0 | 26.6741422    | 25.1693099    | 26.1531567    | 24.9466262     | 25.4797349     | 27.1873123     | 1.077E-34 | -1.0972  | down      | PREDICTED: oral cancer-overexpressed protein 1 homolog [Sesamum indicum]                          |

| #ID             | 0 h-1<br>FPKM | 0 h-2<br>FPKM | 0 h-3<br>FPKM | 28 h-1<br>FPKM | 28 h-2<br>FPKM | 28 h-3<br>FPKM | FDR       | log2FC   | regulated | nr_annotation                                                                               |
|-----------------|---------------|---------------|---------------|----------------|----------------|----------------|-----------|----------|-----------|---------------------------------------------------------------------------------------------|
| c45882.graph_c0 | 7.03864343    | 6.50716737    | 5.87632751    | 5.99540616     | 6.59009174     | 5.74302029     | 3.163E-11 | -1.17252 | down      | PREDICTED: auxin-binding protein T92-like [Sesamum indicum]                                 |
| c45884.graph_c1 | 0.28737606    | 0.14383191    | 0.46161201    | 8.77225701     | 7.73194166     | 7.62677455     | 2.523E-18 | 3.65633  | up        | hypothetical protein MIMGU_mgv1a00116mg [Erythranthe guttata]                               |
| c45885.graph_c0 | 2.70944439    | 2.32967374    | 2.36579995    | 2.52462637     | 1.73242069     | 2.20427972     | 3.388E-07 | -1.28529 | down      | PREDICTED: ADP,ATP carrier protein ER-AN11 [Sesamum indicum]                                |
| c45897.graph_c0 | 0.28665998    | 0.43042055    | 0.36836943    | 2.36121868     | 2.32007312     | 1.75672912     | 0.0006792 | 1.47463  | up        | PREDICTED: uncharacterized protein At1g04910 isoform X2 [Sesamum indicum]                   |
| c45898.graph_c0 | 0.90639556    | 1.20973757    | 1.39770502    | 10.9354669     | 11.8563723     | 11.39596       | 8.167E-16 | 2.18689  | up        | PREDICTED: uncharacterized protein LOC105158788 [Sesamum indicum]                           |
| c45900.graph_c0 | 2.3085226     | 2.05407488    | 1.75795137    | 23.2409268     | 18.6278435     | 23.173085      | 1.56E-21  | 2.32302  | up        | -                                                                                           |
| c45902.graph_c1 | 1.16714335    | 0.89870159    | 1.09602627    | 0              | 0              | 0              | 1.018E-29 | -Inf     | down      | --                                                                                          |
| c45903.graph_c0 | 24.8382072    | 24.242364     | 21.5590912    | 21.1319173     | 24.3475246     | 25.1705657     | 2.083E-31 | -1.08818 | down      | PREDICTED: probable xyloglucan glycosyltransferase 12 [Sesamum indicum]                     |
| c45904.graph_c0 | 16.3871601    | 15.1170149    | 19.4065299    | 6.07181236     | 4.74427841     | 7.24126437     | 1.984E-20 | -2.58687 | down      | -                                                                                           |
| c45908.graph_c0 | 0             | 0             | 0.08585955    | 3.20499609     | 2.54304601     | 2.53600062     | 1.839E-13 | 5.46167  | up        | PREDICTED: chlorophyll a-b binding protein CP24 10A, chloroplastic [Cucumis melo]           |
| c45916.graph_c0 | 749.525642    | 742.087625    | 782.110347    | 324.800612     | 373.731201     | 344.780032     | 3.74E-117 | -2.21523 | down      | PREDICTED: translocator protein homolog [Sesamum indicum]                                   |
| c45917.graph_c1 | 104.635673    | 113.471287    | 106.383371    | 70.6764223     | 70.2557482     | 69.4371172     | 3.23E-98  | -1.71584 | down      | PREDICTED: signal recognition particle receptor subunit alpha homolog [Sesamum indicum]     |
| c45918.graph_c1 | 15.5233174    | 16.0421446    | 17.4444726    | 14.7993987     | 12.9912897     | 13.790709      | 6.981E-22 | -1.32908 | down      | -                                                                                           |
| c45918.graph_c4 | 33.7718362    | 36.3636482    | 33.8041943    | 26.6209549     | 22.5236868     | 22.5545331     | 1.104E-63 | -1.62631 | down      | PREDICTED: branchpoint-bridging protein [Sesamum indicum]                                   |
| c45921.graph_c0 | 1.02637137    | 0.68493275    | 1.09910654    | 0.2486536      | 0.43031253     | 0.49033999     | 1.228E-07 | -2.35636 | down      | PREDICTED: serine/threonine-protein kinase CTR1-like [Sesamum indicum]                      |
| c45923.graph_c0 | 4.52820123    | 2.98442488    | 3.6008155     | 24.6667367     | 24.4636203     | 23.4514779     | 5.93E-47  | 1.61866  | up        | PREDICTED: alpha-glucosidase 2 [Sesamum indicum]                                            |
| c45925.graph_c0 | 0.5693625     | 0.9973821     | 0.18291334    | 4.24154616     | 5.13742726     | 3.5454833      | 0.0002876 | 1.80403  | up        | -                                                                                           |
| c45925.graph_c2 | 0.91159577    | 1.3687629     | 1.03627089    | 5.37678766     | 6.21222031     | 5.59343406     | 8.577E-07 | 1.28201  | up        | PREDICTED: protein LATERAL ROOT PRIMORDIUM 1-like [Sesamum indicum]                         |
| c45931.graph_c0 | 85.8311486    | 90.9976071    | 75.8016161    | 16.8045003     | 19.6137336     | 19.3979374     | 1.79E-118 | -3.26688 | down      | PREDICTED: uncharacterized protein LOC105168927 [Sesamum indicum]                           |
| c45931.graph_c1 | 18.3572667    | 18.1581854    | 20.3328382    | 19.1313644     | 18.2004849     | 20.1418883     | 1.902E-17 | -1.07578 | down      | PREDICTED: uncharacterized protein LOC105168924 isoform X1 [Sesamum indicum]                |
| c45933.graph_c0 | 26.5326757    | 25.6508661    | 27.2097947    | 21.7963424     | 19.8218407     | 23.0905754     | 6.451E-44 | -1.38546 | down      | PREDICTED: N-acylphosphatidylethanolamine synthase isoform X3 [Sesamum indicum]             |
| c45935.graph_c0 | 7.12576487    | 6.12941238    | 6.16262177    | 33.4958905     | 34.1907914     | 33.3258917     | 7.553E-36 | 1.28998  | up        | PREDICTED: 4-hydroxy-tetrahydronicotinate reductase 2, chloroplastic-like [Sesamum indicum] |
| c45937.graph_c0 | 21.0026522    | 19.9286997    | 21.0291159    | 21.1478404     | 20.2143459     | 22.2906819     | 3.011E-23 | -1.05144 | down      | PREDICTED: uncharacterized protein LOC105161374 [Sesamum indicum]                           |

| #ID             | 0 h-1<br>FPKM | 0 h-2<br>FPKM | 0 h-3<br>FPKM | 28 h-1<br>FPKM | 28 h-2<br>FPKM | 28 h-3<br>FPKM | FDR       | log2FC   | regulated | nr_annotation                                                                                      |
|-----------------|---------------|---------------|---------------|----------------|----------------|----------------|-----------|----------|-----------|----------------------------------------------------------------------------------------------------|
| c45939.graph_c0 | 66.0537789    | 60.5230487    | 66.2147865    | 44.9995666     | 42.8966264     | 45.1066839     | 4.514E-65 | -1.62625 | down      | PREDICTED: pentatricopeptide repeat-containing protein At5g65560-like isoform X1 [Sesamum indicum] |
| c45940.graph_c0 | 51.6757703    | 50.202837     | 47.9302893    | 43.1737495     | 40.3226869     | 42.7203621     | 3.212E-57 | -1.33668 | down      | hypothetical protein MIMGU_mgv1a01384/mg [Erythranthe outifata]                                    |
| c45941.graph_c0 | 6.12962639    | 4.95454763    | 5.77071296    | 5.55085386     | 4.19450908     | 4.76272789     | 1.033E-14 | -1.30648 | down      | PREDICTED: exonuclease v, chloroplastic-like [Sesamum indicum]                                     |
| c45944.graph_c0 | 33.8870908    | 35.6901473    | 32.6350039    | 13.0684184     | 13.6652983     | 14.8107259     | 6.11E-139 | -2.38828 | down      | PREDICTED: probable E3 ubiquitin-protein ligase LUL4 isoform X2 [Sesamum indicum]                  |
| c45947.graph_c0 | 28.3022102    | 36.5447339    | 26.6852847    | 280.018186     | 307.295364     | 270.226262     | 5.663E-80 | 2.13833  | up        | hypothetical protein JCGZ_17777 [Jatropha curcas]                                                  |
| c45950.graph_c0 | 2.59269447    | 3.89293599    | 2.57450708    | 2.26979173     | 1.70139625     | 2.13169854     | 9.713E-06 | -1.65864 | down      | Gag-pol polyprotein, putative [Solanum demissum]                                                   |
| c45951.graph_c0 | 0.80840209    | 0.35964959    | 0.46170164    | 16.8428702     | 18.1842008     | 15.7679022     | 1.99E-55  | 3.87696  | up        | PREDICTED: probable ribose-5-phosphate isomerase 4, chloroplastic [Sesamum indicum]                |
| c45957.graph_c1 | 53.6807718    | 50.5769009    | 52.5207238    | 22.9464087     | 25.1105522     | 22.2378977     | 1.46E-157 | -2.24811 | down      | hypothetical protein MIMGU_mgv1a008606mg [Erythranthe outifata]                                    |
| c45959.graph_c0 | 33.8891143    | 33.9626326    | 36.9936586    | 36.3851841     | 35.6809348     | 35.81094       | 2.141E-24 | -1.05062 | down      | PREDICTED: methionine aminopeptidase 1A [Sesamum indicum]                                          |
| c45960.graph_c0 | 24.532705     | 23.6030113    | 24.6538193    | 14.2252097     | 14.3102442     | 14.390312      | 5.49E-107 | -1.85258 | down      | PREDICTED: F-box/LRR-repeat protein 3 isoform X1 [Sesamum indicum]                                 |
| c45961.graph_c1 | 28.8907065    | 29.7745868    | 28.4169092    | 15.1544368     | 14.1216725     | 14.5131361     | 1.09E-132 | -2.08202 | down      | PREDICTED: digalactosyldiacylglycerol synthase 1, chloroplastic [Sesamum indicum]                  |
| c45963.graph_c0 | 65.9154636    | 64.7431545    | 62.5543002    | 30.494433      | 27.1818331     | 27.4876915     | 5.29E-169 | -2.2719  | down      | PREDICTED: protein MEI2-like 2 [Sesamum indicum]                                                   |
| c45964.graph_c2 | 824.165106    | 820.355132    | 822.794958    | 499.134779     | 516.308566     | 514.442549     | 1.025E-91 | -1.78003 | down      | hypothetical protein MIMGU_mgv1a021154mg [Erythranthe outifata]                                    |
| c45964.graph_c5 | 179.862678    | 185.174559    | 169.028982    | 78.9758604     | 76.4835529     | 80.5386253     | 2.61E-164 | -2.26769 | down      | PREDICTED: uncharacterized protein LOC105172390 isoform X1 [Sesamum indicum]                       |
| c45964.graph_c6 | 32.6480749    | 30.9616051    | 31.9690862    | 11.2582809     | 11.1937255     | 10.43265       | 2.2E-209  | -2.63004 | down      | hypothetical protein MIMGU_mgv1a000896mg [Erythranthe outifata]                                    |
| c45969.graph_c0 | 14.497262     | 7.60140798    | 9.31477785    | 0              | 0              | 0              | 2.583E-23 | -Inf     | down      | --                                                                                                 |
| c45973.graph_c0 | 9.00342193    | 10.1389922    | 9.50711314    | 6.6240897      | 6.51364652     | 6.16018086     | 7.8E-55   | -1.66126 | down      | PREDICTED: F-box/kelch-repeat protein At1g55270-like [Sesamum indicum]                             |
| c45974.graph_c1 | 5.67069907    | 2.73307061    | 4.04837379    | 4.42672262     | 3.44561679     | 2.74026652     | 0.0087449 | -1.31939 | down      | hypothetical protein POP1R_0012515190g, partial [Populus trichocarpa]                              |
| c45974.graph_c2 | 45.2739311    | 51.5421536    | 41.9586627    | 47.2148636     | 48.7685079     | 44.4662333     | 7.207E-17 | -1.07227 | down      | PREDICTED: EIN3-binding F-box protein 1-like [Sesamum indicum]                                     |
| c45974.graph_c3 | 3.96752017    | 2.69761791    | 3.55927469    | 3.78128623     | 3.6106446      | 3.15209218     | 5.063E-05 | -1.04634 | down      | hypothetical protein MIMGU_mgv1a004105mg [Erythranthe outifata]                                    |
| c45979.graph_c0 | 1.15627696    | 1.3268155     | 0.83353216    | 6.60002168     | 5.94069393     | 6.37235965     | 8.514E-10 | 1.42559  | up        | PREDICTED: uncharacterized protein LOC105161942 [Sesamum indicum]                                  |
| c45981.graph_c1 | 44.5813044    | 46.6543979    | 41.9212747    | 45.2416965     | 44.426342      | 43.3828056     | 9.814E-41 | -1.0909  | down      | PREDICTED: DEAD-box ATP-dependent RNA helicase 51-like [Sesamum indicum]                           |
| c45985.graph_c0 | 12.0303205    | 11.738667     | 10.8826308    | 10.4500972     | 9.79902612     | 10.6550809     | 7.065E-45 | -1.25411 | down      | PREDICTED: uncharacterized protein LOC105175876 isoform X1 [Sesamum indicum]                       |
| c45987.graph_c0 | 2.70987778    | 2.53997187    | 2.05772287    | 12.1215222     | 12.3834005     | 11.2351958     | 3.724E-15 | 1.20248  | up        | hypothetical protein MIMGU_mgv1a004935mg [Erythranthe outifata]                                    |

| #ID             | 0 h-1<br>FPKM | 0 h-2<br>FPKM | 0 h-3<br>FPKM | 28 h-1<br>FPKM | 28 h-2<br>FPKM | 28 h-3<br>FPKM | FDR       | log2FC   | regulated | nr_annotation                                                                                                     |
|-----------------|---------------|---------------|---------------|----------------|----------------|----------------|-----------|----------|-----------|-------------------------------------------------------------------------------------------------------------------|
| c45989.graph_c0 | 0.40063175    | 0.47264594    | 0.47805426    | 2.46460403     | 2.89195932     | 2.48629262     | 7.132E-09 | 1.44412  | up        | PREDICTED: pentatricopeptide repeat-containing protein At4g21300 [Sesamum indicum]                                |
| c45991.graph_c0 | 0.54265933    | 0.50698921    | 0.46489248    | 3.8651364      | 3.34741268     | 2.98227785     | 2.245E-06 | 1.66145  | up        | PREDICTED: uncharacterized protein LOC105179859 isoform X3 [Sesamum indicum]                                      |
| c45992.graph_c0 | 67.9098448    | 72.7093439    | 67.0455364    | 73.0345503     | 69.3789233     | 69.1230856     | 4.75E-40  | -1.06362 | down      | PREDICTED: putative clathrin assembly protein At2g01600 [Sesamum indicum]                                         |
| c45999.graph_c0 | 0.12562038    | 0.25149235    | 0             | 1.18690221     | 0.96861705     | 0.94987746     | 0.0002628 | 1.96719  | up        | PREDICTED: neparanase-like protein 1 isoform X1 [Sesamum indicum]                                                 |
| c46005.graph_c0 | 0.31399005    | 0.12572179    | 0.48418758    | 3.62847797     | 3.62645831     | 3.03529414     | 1.163E-11 | 2.37684  | up        | MYB-related transcription factor [Salvia miltiorrhiza]                                                            |
| c46007.graph_c1 | 39.7646948    | 34.6807407    | 37.4546317    | 449.068478     | 415.807438     | 425.016832     | 3.88E-188 | 2.43683  | up        | PREDICTED: glyoxysomal fatty acid beta-oxidation multifunctional protein MFP-a [Sesamum indicum]                  |
| c46010.graph_c0 | 59.179845     | 60.9146952    | 53.910594     | 51.3502896     | 46.2271885     | 49.7605179     | 1.224E-59 | -1.32906 | down      | PREDICTED: phosphoinositide phosphatase SAC1 isoform X4 [Sesamum indicum]                                         |
| c46015.graph_c0 | 0.08872793    | 0             | 0             | 10.2211818     | 11.4413443     | 10.1821298     | 3.549E-52 | 7.42816  | up        | PREDICTED: cytochrome P450 724B1 isoform X1 [Vitis vinifera]                                                      |
| c46019.graph_c1 | 56.9482476    | 63.0751092    | 52.6676104    | 60.3720863     | 61.821526      | 56.6504325     | 2.242E-22 | -1.03911 | down      | PREDICTED: malate dehydrogenase, chloroplastic-like [Solanum tuberosum]                                           |
| c46019.graph_c2 | 90.191711     | 82.2390824    | 82.1280425    | 85.5518442     | 80.4308935     | 84.1447984     | 7.232E-44 | -1.11477 | down      | PREDICTED: protein ACCUMULATION AND REPLICATION OF CHLOROPLASTS 3 [Sesamum indicum]                               |
| c46020.graph_c0 | 99.4260407    | 99.697493     | 90.9464743    | 82.7280899     | 80.0725118     | 77.6749084     | 1.44E-63  | -1.36007 | down      | PREDICTED: flowering time control protein FCA isoform X4 [Sesamum indicum]                                        |
| c46021.graph_c1 | 1.42281992    | 1.24621407    | 0.45709498    | 7.04478796     | 7.11940851     | 6.11765849     | 4.171E-05 | 1.61845  | up        | PREDICTED: probable cyclic nucleotide-gated ion channel 5 [Sesamum indicum]                                       |
| c46024.graph_c0 | 8.94807643    | 7.45225443    | 8.03371122    | 43.7202601     | 44.7835565     | 43.7274532     | 3.692E-48 | 1.34643  | up        | PREDICTED: KH domain-containing protein At4g18375-like [Sesamum indicum]                                          |
| c46028.graph_c0 | 126.903244    | 126.947635    | 116.654494    | 563.761186     | 535.963505     | 524.802221     | 5.234E-35 | 1.04284  | up        | PREDICTED: mannose-6-phosphate isomerase $\alpha$ -like [Sesamum indicum]                                         |
| c46030.graph_c0 | 0.67837597    | 1.01858288    | 0.87173997    | 6.76168789     | 5.45861571     | 5.94853539     | 5.739E-18 | 1.73002  | up        | PREDICTED: uncharacterized protein LOC105166222 isoform X2 [Sesamum indicum]                                      |
| c46032.graph_c1 | 5.85874743    | 5.36901289    | 5.00147522    | 35.6241366     | 32.8240834     | 34.1993087     | 2.06E-70  | 1.57241  | up        | PREDICTED: CAP-Gly domain-containing linker protein 1 [Sesamum indicum]                                           |
| c46041.graph_c1 | 19.4887847    | 20.9781032    | 18.6971283    | 19.0636446     | 20.497547      | 17.7723777     | 2.222E-31 | -1.1357  | down      | PREDICTED: pentatricopeptide repeat-containing protein At2g03880, mitochondrial-like isoform X1 [Sesamum indicum] |
| c46042.graph_c0 | 3.70115574    | 3.16002925    | 3.82355682    | 29.5370206     | 25.7166902     | 25.7159386     | 4.522E-40 | 1.83016  | up        | PREDICTED: methylmalonate-semialdehyde dehydrogenase [acylating], mitochondrial-like [Sesamum indicum]            |
| c46047.graph_c0 | 3.00559397    | 2.48711232    | 2.42037921    | 16.6600596     | 15.0161738     | 17.1119235     | 6.635E-19 | 1.53653  | up        | PREDICTED: histone-lysine N-methyltransferase ATXR2 [Sesamum indicum]                                             |
| c46051.graph_c0 | 194.468858    | 201.839392    | 190.278287    | 197.231802     | 192.246831     | 191.124561     | 3.14E-41  | -1.10501 | down      | PREDICTED: uncharacterized protein LOC105174291 isoform X1 [Sesamum indicum]                                      |

| #ID             | 0 h-1<br>FPKM | 0 h-2<br>FPKM | 0 h-3<br>FPKM | 28 h-1<br>FPKM | 28 h-2<br>FPKM | 28 h-3<br>FPKM | FDR       | log2FC   | regulated | nr_annotation                                                                                                                                 |
|-----------------|---------------|---------------|---------------|----------------|----------------|----------------|-----------|----------|-----------|-----------------------------------------------------------------------------------------------------------------------------------------------|
| c46053.graph_c0 | 3.00966655    | 2.68402425    | 3.51594607    | 28.3169948     | 25.8907771     | 24.8588909     | 3.835E-33 | 2.00846  | up        | PREDICTED: (RS)-norcochlorine 6-O-methyltransferase-like [Cucumis melo]                                                                       |
| c46054.graph_c0 | 6.91518015    | 6.48947312    | 6.14898858    | 0.53849069     | 0.70905129     | 0.73234001     | 2.03E-105 | -4.39256 | down      | PREDICTED: exocyst complex component EXO70A1-like [Sesamum indicum]                                                                           |
| c46055.graph_c0 | 1.55264924    | 1.46169184    | 1.97146318    | 11.0024511     | 9.99482997     | 10.7756847     | 3.005E-28 | 1.57803  | up        | PREDICTED: importin-13 [Sesamum indicum]                                                                                                      |
| c46056.graph_c2 | 8.33841775    | 8.82307751    | 8.35668891    | 47.494417      | 56.1166654     | 46.3743758     | 4.913E-24 | 1.46414  | up        | PREDICTED: cytochrome P450 93A3-like [Sesamum indicum]                                                                                        |
| c46064.graph_c0 | 59.719391     | 52.4351838    | 58.8749237    | 33.2985501     | 36.5633808     | 38.0337975     | 3.857E-45 | -1.755   | down      | hypothetical protein M569_12324 [Genlisea aurea]                                                                                              |
| c46067.graph_c1 | 2.32595713    | 1.57501715    | 2.32962046    | 12.2063484     | 13.9167752     | 11.0151372     | 1.291E-13 | 1.4829   | up        | PREDICTED: diacylglycerol kinase 5 [Sesamum indicum]                                                                                          |
| c46068.graph_c0 | 23.8187642    | 22.487921     | 22.8864775    | 19.0031306     | 18.6382079     | 19.8939934     | 2.697E-57 | -1.35607 | down      | PREDICTED: cation/H(+) antiporter 18-like [Sesamum indicum]                                                                                   |
| c46070.graph_c0 | 66.8278468    | 60.9005303    | 73.2896106    | 18.7517451     | 18.8739771     | 20.1464533     | 9.016E-44 | -2.89065 | down      | PREDICTED: glucan endo-1,3-beta-glucosidase 14-like [Sesamum indicum]                                                                         |
| c46073.graph_c0 | 200.953026    | 197.225619    | 206.108563    | 146.127364     | 146.063432     | 162.397934     | 3.541E-65 | -1.5011  | down      | PREDICTED: RING finger and CHY zinc finger domain-containing protein 1-like isoform X1 [Sesamum indicum]                                      |
| c46074.graph_c0 | 0.26143258    | 0.57572761    | 0.47033171    | 3.42013849     | 3.2253117      | 2.54273352     | 3.171E-05 | 1.71698  | up        | PREDICTED: violaxanthin de-epoxidase, chloroplastic [Sesamum indicum]                                                                         |
| c46077.graph_c0 | 9.29998946    | 11.3156171    | 10.3024609    | 48.6544332     | 50.7698535     | 51.4932391     | 1.187E-19 | 1.1961   | up        | PREDICTED: 40S ribosomal protein S20-2-like [Sesamum indicum]                                                                                 |
| c46079.graph_c0 | 0.38714259    | 0.44715029    | 0.30614988    | 10.692174      | 11.9795968     | 10.9147391     | 3.548E-54 | 3.7927   | up        | PREDICTED: probable beta-D-xylosidase 7 [Sesamum indicum]                                                                                     |
| c46082.graph_c0 | 22.2352414    | 23.1487972    | 22.31186      | 7.83754632     | 8.3750226      | 8.28758301     | 2.53E-157 | -2.55671 | down      | PREDICTED: uncharacterized protein LOC105165640 isoform X3 [Sesamum indicum]                                                                  |
| c46087.graph_c1 | 1107.63223    | 1134.59727    | 1185.00262    | 108.898599     | 110.281759     | 123.256788     | 0         | -4.41396 | down      | PREDICTED: SUMO-activating enzyme subunit 2 [Sesamum indicum]                                                                                 |
| c46087.graph_c2 | 102.103117    | 108.075582    | 96.7042365    | 57.0670942     | 57.8292025     | 54.0296717     | 1.69E-127 | -1.95127 | down      | PREDICTED: zinc finger protein JAKDAW-like [Sesamum indicum]                                                                                  |
| c46089.graph_c0 | 2.08686183    | 1.88005636    | 1.60902005    | 8.4177913      | 8.53627068     | 8.1064794      | 3.434E-07 | 1.08047  | up        | PREDICTED: 1-(5-phosphoribosyl)-5-[(5-phosphoribosylamino)methylideneamino]imidazole-4-carboxamide isomerase, chloroplastic [Sesamum indicum] |
| c46092.graph_c0 | 0.27137535    | 0.29428435    | 0.20342471    | 1.36420212     | 1.17238533     | 1.15341313     | 0.0042793 | 1.17537  | up        | hypothetical protein M569_17037, partial [Genlisea aurea]                                                                                     |
| c46093.graph_c0 | 0.53558359    | 0.31427718    | 0.71197874    | 3.54359979     | 4.29029008     | 4.06350185     | 1.63E-14  | 1.833    | up        | PREDICTED: uncharacterized protein LOC105169441 [Sesamum indicum]                                                                             |
| c46094.graph_c0 | 11.6622083    | 13.5975969    | 11.8149497    | 7.17484921     | 6.68397915     | 7.04233808     | 2.018E-43 | -1.91696 | down      | PREDICTED: probable protein phosphatase 2C25 [Sesamum indicum]                                                                                |
| c46097.graph_c0 | 5.39513255    | 5.26881459    | 6.73004305    | 3.67249287     | 3.78221752     | 3.69908142     | 4.219E-11 | -1.73481 | down      | PREDICTED: uncharacterized protein LOC105179152 isoform X1 [Sesamum indicum]                                                                  |
| c46098.graph_c0 | 66.511901     | 67.4782121    | 61.6595381    | 44.7224688     | 50.1803337     | 46.8260667     | 1.082E-67 | -1.55482 | down      | -                                                                                                                                             |
| c46100.graph_c0 | 1.43916961    | 1.31349801    | 1.19666407    | 0.83063132     | 0.86109068     | 1.07944074     | 8.151E-06 | -1.5983  | down      | hypothetical protein M569_02521, partial [Genlisea aurea]                                                                                     |
| c46103.graph_c1 | 11.3382725    | 11.0237995    | 10.0852249    | 9.50230841     | 9.64770521     | 9.2766836      | 4.792E-39 | -1.2801  | down      | PREDICTED: uncharacterized protein LOC105171484 [Sesamum indicum]                                                                             |

| #ID             | 0 h-1<br>FPKM | 0 h-2<br>FPKM | 0 h-3<br>FPKM | 28 h-1<br>FPKM | 28 h-2<br>FPKM | 28 h-3<br>FPKM | FDR       | log2FC   | regulated | nr_annotation                                                                               |
|-----------------|---------------|---------------|---------------|----------------|----------------|----------------|-----------|----------|-----------|---------------------------------------------------------------------------------------------|
| c46112.graph_c0 | 1.91746757    | 2.69979798    | 2.3557131     | 11.011006      | 11.5044031     | 11.3467052     | 4.697E-17 | 1.18774  | up        | CAI-1 autoinducer sensor kinase/phosphatase cqsS isoform 2 [Theobroma cacao]                |
| c46114.graph_c0 | 0             | 0             | 0             | 3.29689138     | 4.04842597     | 5.16525397     | 7.097E-14 | Inf      | up        | 40S ribosomal protein S17 [Auxenochlorella protothecoides]                                  |
| c46117.graph_c1 | 6.37633378    | 6.60281246    | 5.65092507    | 5.67300116     | 5.9157666      | 5.41150955     | 9.761E-06 | -1.22132 | down      | hypothetical protein MIMGU_mgv1a015893mg [Erythranthe <sup>cutifata</sup> ]                 |
| c46120.graph_c0 | 10.1528231    | 10.2850676    | 9.83405916    | 9.43981886     | 11.0842543     | 8.37183895     | 6.761E-22 | -1.1583  | down      | PREDICTED: PHD finger protein ALFIN-LIKE 3-like isoform X2 [Elaeis guineensis]              |
| c46130.graph_c0 | 110.017843    | 121.043923    | 115.133348    | 16.4375936     | 16.3024772     | 16.2065079     | 2.76E-241 | -3.91321 | down      | PREDICTED: GATA transcription factor 5-like [Sesamum indicum]                               |
| c46132.graph_c1 | 4.73239017    | 4.82822758    | 3.04065437    | 3.77019254     | 4.24023258     | 4.64165586     | 0.0001907 | -1.07865 | down      | -                                                                                           |
| c46142.graph_c0 | 29.4889497    | 27.600508     | 26.8262817    | 22.8514993     | 22.1655492     | 22.9105805     | 1.379E-63 | -1.3943  | down      | PREDICTED: homeobox protein LUMINIDEPENDENS [Sesamum indicum]                               |
| c46143.graph_c0 | 0.32799317    | 0.2872814     | 0.52685526    | 3.78433875     | 2.9864271      | 3.1123044      | 1.043E-07 | 2.01521  | up        | hypothetical protein MIMGU_mgv1a018015mg [Erythranthe <sup>cutifata</sup> ]                 |
| c46144.graph_c1 | 0.7761794     | 1.06831536    | 0.78962516    | 34.0118987     | 33.9778842     | 30.7646885     | 7.18E-150 | 4.13821  | up        | hypothetical protein MIMGU_mgv1a007954mg [Erythranthe <sup>cutifata</sup> ]                 |
| c46148.graph_c0 | 2.97624609    | 2.78492898    | 2.41115713    | 16.5055347     | 18.7666781     | 18.0729564     | 2.231E-14 | 1.61856  | up        | PREDICTED: proline synthase co-transcribed bacterial homolog protein-like [Sesamum indicum] |
| c46149.graph_c1 | 2.07611406    | 0.95103746    | 2.21570423    | 0.15344824     | 0              | 0.14608127     | 2.7E-08   | -5.21838 | down      | PREDICTED: geraniol 8-hydroxylase-like [Vitis vinifera]                                     |
| c46151.graph_c0 | 1.46209687    | 0.75395564    | 0.91095873    | 10.1112147     | 10.1761707     | 10.5366819     | 1.124E-18 | 2.21591  | up        | PREDICTED: uncharacterized protein LOC105155656 [Sesamum indicum]                           |
| c46153.graph_c0 | 23.1959549    | 23.9859135    | 21.9333639    | 25.1071025     | 23.548991      | 24.1364241     | 2.913E-36 | -1.01491 | down      | PREDICTED: uncharacterized protein LOC105171827 [Sesamum indicum]                           |
| c46154.graph_c1 | 2.11936722    | 2.3572105     | 1.96695112    | 0.55623529     | 0.34769653     | 0.48879757     | 1.452E-17 | -3.29842 | down      | hypothetical protein MIMGU_mgv1a012700mg [Erythranthe <sup>cutifata</sup> ]                 |
| c46155.graph_c0 | 41.1855307    | 44.2292818    | 39.9976894    | 45.9649674     | 42.3196813     | 43.8152265     | 3.283E-36 | -1.01497 | down      | PREDICTED: uncharacterized protein LOC105178641 [Sesamum indicum]                           |
| c46159.graph_c0 | 2.85587877    | 1.53932073    | 2.54071197    | 37.8404451     | 30.2740023     | 43.1242641     | 4.361E-15 | 2.91438  | up        | dehydration responsive protein, partial [Corchorus olitorius]                               |
| c46164.graph_c0 | 31.6762686    | 30.7937336    | 30.6756541    | 25.4058099     | 21.5768871     | 22.577513      | 4.991E-58 | -1.51147 | down      | PREDICTED: protein Brevis radix-like 1 [Sesamum indicum]                                    |
| c46166.graph_c0 | 0             | 0             | 0             | 2.68582259     | 4.09948248     | 4.95721151     | 4.029E-10 | Inf      | up        | ribosomal protein S18 [Micromonas pusilla CCMP1545]                                         |
| c46170.graph_c0 | 3.99701356    | 3.4453193     | 3.40043452    | 20.7923144     | 18.8585134     | 19.5233844     | 4.116E-35 | 1.35946  | up        | PREDICTED: E3 ubiquitin-protein ligase UPL1 [Sesamum indicum]                               |
| c46179.graph_c0 | 82.1261691    | 76.7874023    | 83.9799927    | 22.3335569     | 23.4128217     | 22.9995301     | 6.79E-144 | -2.91205 | down      | PREDICTED: peptidyl-prolyl cis-trans isomerase FKBP53 [Sesamum indicum]                     |
| c46180.graph_c1 | 4.35480189    | 3.86135696    | 3.93799126    | 0.55681346     | 0.28224581     | 0.38261493     | 3.1E-150  | -4.40387 | down      | PREDICTED: replication protein A 70 kDa DNA-binding subunit A isoform X1 [Sesamum indicum]  |
| c46182.graph_c0 | 25.0297438    | 22.9480968    | 19.0280772    | 15.6785373     | 15.5373466     | 16.1368228     | 6.864E-22 | -1.5879  | down      | PREDICTED: uncharacterized protein LOC105163032 [Sesamum indicum]                           |
| c46184.graph_c0 | 3.41155127    | 3.45765452    | 4.05518007    | 24.7019769     | 24.934103      | 23.7225866     | 7.362E-30 | 1.65431  | up        | PREDICTED: DNA repair protein RAD50 [Sesamum indicum]                                       |
| c46186.graph_c0 | 0             | 0             | 0             | 2.29555054     | 3.40230228     | 5.15999947     | 5.578E-08 | Inf      | up        | ATP synthase F0 subunit 9 (mitochondrion) [Hildenbrandia rubra]                             |



| #ID             | 0 h-1<br>FPKM | 0 h-2<br>FPKM | 0 h-3<br>FPKM | 28 h-1<br>FPKM | 28 h-2<br>FPKM | 28 h-3<br>FPKM | FDR       | log2FC   | regulated | nr_annotation                                                                       |
|-----------------|---------------|---------------|---------------|----------------|----------------|----------------|-----------|----------|-----------|-------------------------------------------------------------------------------------|
| c46190.graph_c1 | 38.0099736    | 40.559052     | 37.6405934    | 18.7430481     | 19.0511639     | 19.5758173     | 3.29E-145 | -2.10843 | down      | PREDICTED: protein ASPARTIC PROTEASE IN GUARD CELL 1-like [Sesamum indicum]         |
| c46190.graph_c3 | 1.82599866    | 1.82782712    | 4.35774963    | 33.0833378     | 33.8939148     | 28.1560086     | 7.022E-23 | 2.46577  | up        | -                                                                                   |
| c46194.graph_c0 | 1.53447072    | 1.45516478    | 1.2453825     | 6.54472418     | 6.06826618     | 6.84917607     | 1.75E-05  | 1.11273  | up        | PREDICTED: F-box protein At5g07610-like [Sesamum indicum]                           |
| c46194.graph_c1 | 0.33937193    | 0.2717694     | 0.08722127    | 2.61452773     | 2.85062449     | 3.05926281     | 5.977E-07 | 2.53319  | up        | -                                                                                   |
| c46199.graph_c0 | 1.2621641     | 1.34117738    | 1.47221414    | 8.70761272     | 8.90704757     | 8.29148367     | 6.763E-22 | 1.57547  | up        | PREDICTED: IAA-amino acid hydrolase ILK1-like 5 [Sesamum indicum]                   |
| c46204.graph_c0 | 6.73143247    | 5.54908363    | 5.99291939    | 32.7756567     | 31.7298402     | 31.4934776     | 5.37E-25  | 1.30369  | up        | PREDICTED: probable cinnamyl alcohol dehydrogenase 6 [Sesamum indicum]              |
| c46205.graph_c0 | 10.9438953    | 8.8039009     | 12.136854     | 109.539468     | 101.953624     | 113.566594     | 8.089E-78 | 2.25754  | up        | PREDICTED: uncharacterized protein LOC104222596 [Nicotiana sylvestris]              |
| c46205.graph_c1 | 24.9804604    | 21.471606     | 26.5306026    | 183.050572     | 179.20703      | 202.346156     | 2.061E-50 | 1.86034  | up        | PREDICTED: uncharacterized protein LOC102603928 [Solanum tuberosum]                 |
| c46206.graph_c0 | 3.60387609    | 3.48948299    | 4.32815277    | 2.32552575     | 2.27655123     | 2.41695593     | 7.752E-15 | -1.79534 | down      | hypothetical protein MIMGU_mgv1a005112mg [Erythranthe guttata]                      |
| c46208.graph_c0 | 17.8031739    | 17.5971895    | 17.8496991    | 5.3625753      | 5.63054595     | 4.59129352     | 7.49E-154 | -2.86418 | down      | PREDICTED: uncharacterized protein LOC105158293 isoform X2 [Sesamum indicum]        |
| c46211.graph_c0 | 128.458572    | 128.041881    | 123.665751    | 133.66977      | 131.237456     | 133.240187     | 9.555E-36 | -1.02334 | down      | PREDICTED: interferon-induced guanylate-binding protein 1 [Sesamum indicum]         |
| c46212.graph_c0 | 9.1786692     | 8.27444724    | 8.09322333    | 8.4135273      | 9.0408072      | 9.06186339     | 2.465E-23 | -1.03528 | down      | PREDICTED: protein root UVB sensitive 1, chloroplastic [Sesamum indicum]            |
| c46212.graph_c1 | 3.87999963    | 3.157076      | 3.32396876    | 36.4121328     | 36.003606      | 35.6194166     | 1.21E-103 | 2.29318  | up        | PREDICTED: heterogeneous nuclear ribonucleoprotein 1-like [Sesamum indicum]         |
| c46212.graph_c2 | 130.254003    | 133.060098    | 121.799553    | 29.6132403     | 32.9958045     | 31.233465      | 0         | -3.12668 | down      | PREDICTED: ubiquinol oxidase 2, mitochondrial-like [Sesamum indicum]                |
| c46213.graph_c2 | 64.445769     | 67.0081753    | 59.7274448    | 54.2037043     | 55.2346835     | 50.4711078     | 1.487E-63 | -1.34753 | down      | PREDICTED: protein ETHYLENE INSENSITIVE 3-like [Sesamum indicum]                    |
| c46214.graph_c0 | 5.22047418    | 6.81613264    | 8.26411392    | 1.70464532     | 2.08527954     | 3.00630439     | 1.485E-08 | -2.67239 | down      | -                                                                                   |
| c46218.graph_c0 | 0.96392878    | 0.69126735    | 0.7025387     | 0.18821495     | 0.16049932     | 0.08532326     | 3.835E-24 | -3.53141 | down      | hypothetical protein MIMGU_mgv1a020511mg [Erythranthe guttata]                      |
| c46221.graph_c0 | 1.26585852    | 1.50620648    | 1.65737036    | 0.26038264     | 0.26644793     | 0.16997609     | 6.417E-29 | -3.76387 | down      | hypothetical protein MIMGU_mgv1a023003mg, partial [Erythranthe guttata]             |
| c46226.graph_c0 | 3.84435133    | 3.5828077     | 3.81157636    | 3.70934541     | 3.67541104     | 3.95055785     | 6.031E-14 | -1.07796 | down      | PREDICTED: CSC1-like protein At3g54510 isoform X2 [Sesamum indicum]                 |
| c46227.graph_c0 | 1.44304694    | 1.06212642    | 0.54540366    | 7.58836343     | 7.04654438     | 6.14170078     | 3.761E-09 | 1.68727  | up        | -                                                                                   |
| c46231.graph_c0 | 0.04575881    | 0.04580463    | 0             | 0.79817372     | 0.87081688     | 1.51970756     | 0.0001283 | 4.05476  | up        | PREDICTED: vestitone reductase-like [Sesamum indicum]                               |
| c46232.graph_c0 | 0.68352591    | 0.45614024    | 0.29278595    | 4.51835686     | 5.08354619     | 4.96096425     | 5.779E-13 | 2.26482  | up        | PREDICTED: uncharacterized protein LOC103980779 [Musa acuminata subsp. malaccensis] |

| #ID             | 0 h-1<br>FPKM | 0 h-2<br>FPKM | 0 h-3<br>FPKM | 28 h-1<br>FPKM | 28 h-2<br>FPKM | 28 h-3<br>FPKM | FDR       | log2FC   | regulated | nr_annotation                                                                                        |
|-----------------|---------------|---------------|---------------|----------------|----------------|----------------|-----------|----------|-----------|------------------------------------------------------------------------------------------------------|
| c46234.graph_c2 | 64.9349124    | 75.9587399    | 51.0114136    | 29.8836622     | 38.5537561     | 48.6705233     | 3.167E-09 | -1.7981  | down      | PREDICTED: uncharacterized protein LOC105177376 [Sesamum indicum]                                    |
| c46239.graph_c0 | 0.22884524    | 0.13744464    | 0.02940752    | 4.15808512     | 4.17484944     | 3.75940356     | 1.105E-26 | 3.86083  | up        | PREDICTED: subtilisin-like protease SBT3.5 [Sesamum indicum]                                         |
| c46241.graph_c0 | 2.36650158    | 2.21353545    | 4.28737946    | 1.21243061     | 1.06925277     | 0.73624817     | 0.0008931 | -2.65614 | down      | hypothetical protein (mitochondrion) [Vicia faba]                                                    |
| c46242.graph_c0 | 0             | 0             | 0             | 1.83429443     | 2.73909321     | 3.68435515     | 2.693E-07 | Inf      | up        | unknown [Picea sitchensis]                                                                           |
| c46243.graph_c1 | 2.68067734    | 3.04927459    | 2.66187276    | 11.9850022     | 13.4600327     | 13.0796983     | 1.384E-09 | 1.10869  | up        | hypothetical protein MIMGU_mgv1a008659mg [Erythranthe outtata]                                       |
| c46243.graph_c2 | 170.124301    | 154.721201    | 168.292911    | 83.6629513     | 90.2072142     | 87.6222886     | 5.661E-93 | -2.00593 | down      | PREDICTED: probable phospholipid hydroperoxide glutathione peroxidase [Sesamum indicum]              |
| c46246.graph_c0 | 24.3230999    | 23.9463445    | 23.0172939    | 225.939146     | 250.80817      | 213.689812     | 2.481E-74 | 2.18533  | up        | PREDICTED: serine carboxypeptidase-like 25 [Sesamum indicum]                                         |
| c46247.graph_c0 | 37.8996991    | 40.8348492    | 34.403446     | 37.6793318     | 38.5510355     | 39.0501218     | 4.743E-29 | -1.06192 | down      | PREDICTED: UDP-glycosyltransferase YIC1-like [Sesamum indicum]                                       |
| c46249.graph_c2 | 6.22398768    | 3.36768652    | 3.45862512    | 0              | 0              | 0.1995236      | 1.605E-12 | -7.101   | down      | -                                                                                                    |
| c46249.graph_c6 | 11.7563845    | 14.7516331    | 11.9157112    | 0.60172342     | 0.76061976     | 1.17840335     | 6.275E-48 | -5.00605 | down      | -                                                                                                    |
| c46250.graph_c0 | 0.86089941    | 1.16337798    | 1.2169188     | 14.5474489     | 13.2197242     | 13.6830997     | 2.635E-31 | 2.58267  | up        | PREDICTED: uncharacterized protein LOC105168273 [Sesamum indicum]                                    |
| c46259.graph_c0 | 1.42853113    | 2.33993715    | 1.60208209    | 26.6924172     | 26.5721849     | 25.4776761     | 2.147E-96 | 2.78344  | up        | PREDICTED: phosphoglycerate kinase, cytosolic-like [Sesamum indicum]                                 |
| c46268.graph_c0 | 1.60683248    | 1.68503393    | 1.44211281    | 12.6052203     | 12.6868378     | 11.1933236     | 1.167E-28 | 1.85661  | up        | PREDICTED: trimethylguanosine synthase isoform X2 [Sesamum indicum]                                  |
| c46269.graph_c0 | 0             | 0.07531056    | 0.2900407     | 1.91381832     | 2.17234097     | 1.78475442     | 1.679E-08 | 2.88517  | up        | hypothetical protein MIMGU_mgv1a009279mg [Erythranthe outtata]                                       |
| c46272.graph_c0 | 6.12378538    | 4.98055791    | 5.016683      | 0              | 0              | 0              | 1.349E-63 | -Inf     | down      | hypothetical protein S//11_01518 [Stachybotrys chartarum IB 17711]                                   |
| c46273.graph_c1 | 36.0555233    | 38.9338431    | 34.2862534    | 32.3467309     | 31.838308      | 32.4754652     | 5.865E-54 | -1.26657 | down      | hypothetical protein MIMGU_mgv1a00258/mg [Erythranthe outtata]                                       |
| c46275.graph_c0 | 35.1155901    | 33.8258052    | 33.4657133    | 20.8598029     | 19.9183363     | 22.1406051     | 2.61E-107 | -1.79233 | down      | PREDICTED: DIS3-like exonuclease 2 [Sesamum indicum]                                                 |
| c46280.graph_c0 | 27.4148293    | 30.5477586    | 26.8083187    | 17.6471466     | 16.5361671     | 18.1735721     | 2.782E-65 | -1.78477 | down      | PREDICTED: uncharacterized protein LOC105162504 [Sesamum indicum]                                    |
| c46282.graph_c0 | 20.1072363    | 19.2435909    | 18.0796966    | 18.2155307     | 18.3719531     | 18.1911716     | 1.08E-34  | -1.1575  | down      | PREDICTED: uncharacterized PKHD-type hydroxylase At1g22950 [Sesamum indicum]                         |
| c46288.graph_c0 | 24.90261      | 25.2628943    | 22.6732407    | 25.0789851     | 22.6683993     | 22.760128      | 2.295E-33 | -1.13634 | down      | PREDICTED: magnesium transporter MKS2-1-like [Sesamum indicum]                                       |
| c46291.graph_c0 | 6.06142864    | 6.17662591    | 5.23948155    | 39.4110005     | 32.0503184     | 35.0943604     | 9.307E-22 | 1.51953  | up        | hypothetical protein MIMGU_mgv11b00549/mg [Erythranthe outtata]                                      |
| c46293.graph_c0 | 38.7463702    | 39.5814826    | 39.3273735    | 208.517965     | 214.865501     | 206.615394     | 5.826E-62 | 1.32996  | up        | hypothetical protein POPTR_0016s08070g [Populus trichocarpa]                                         |
| c46303.graph_c0 | 3.51617589    | 3.21789653    | 2.74728305    | 1.94653327     | 1.74212005     | 2.00169917     | 2.041E-31 | -1.82365 | down      | PREDICTED: saccin [Sesamum indicum]                                                                  |
| c46307.graph_c0 | 27.9436035    | 28.797924     | 26.6618534    | 28.4489493     | 28.9099902     | 28.6892134     | 1.805E-38 | -1.04482 | down      | PREDICTED: LOW QUALITY PROTEIN: translocase of chloroplast 120, chloroplastic-like [Sesamum indicum] |
| c46308.graph_c0 | 3.0007704     | 2.83454844    | 2.87850372    | 21.8094263     | 19.7196021     | 20.0271193     | 1.055E-26 | 1.73029  | up        | PREDICTED: glycine--tRNA ligase 2, chloroplastic/mitochondrial isoform X1 [Cucumis melo]             |

| #ID             | 0 h-1<br>FPKM | 0 h-2<br>FPKM | 0 h-3<br>FPKM | 28 h-1<br>FPKM | 28 h-2<br>FPKM | 28 h-3<br>FPKM | FDR       | log2FC   | regulated | nr_annotation                                                                                                     |
|-----------------|---------------|---------------|---------------|----------------|----------------|----------------|-----------|----------|-----------|-------------------------------------------------------------------------------------------------------------------|
| c46309.graph_c0 | 4.48997595    | 4.11196373    | 5.15598869    | 21.0725128     | 19.1205388     | 18.5264068     | 1.126E-10 | 1.00054  | up        | PREDICTED: persulfide dioxygenase ETHE1 homolog, mitochondrial [Sesamum indicum]                                  |
| c46314.graph_c0 | 30.6954798    | 32.321003     | 29.0377299    | 23.2163367     | 23.349389      | 24.2827715     | 2.815E-65 | -1.46722 | down      | PREDICTED: uncharacterized protein LOC105166052 [Sesamum indicum]                                                 |
| c46315.graph_c0 | 0.53551212    | 0.75940183    | 0.83151974    | 6.74625674     | 5.93017094     | 5.30639677     | 4.105E-19 | 1.98421  | up        | hypothetical protein MIMGU_mgv1a001352mg [Erythranthe diffusa]                                                    |
| c46320.graph_c0 | 1.05642002    | 2.04673135    | 1.22616656    | 8.29719334     | 8.45319442     | 8.44789481     | 3.62E-11  | 1.45104  | up        | PREDICTED: MORC family CW-type zinc finger protein 3-like isoform X1 [Sesamum indicum]                            |
| c46324.graph_c1 | 5.10169226    | 4.81288424    | 4.90511626    | 1.58718627     | 1.52942193     | 1.3277814      | 5.742E-75 | -2.82836 | down      | PREDICTED: kinesin-4-like [Sesamum indicum]                                                                       |
| c46325.graph_c0 | 1.20794422    | 1.17076796    | 1.03483743    | 5.22575536     | 5.48588818     | 5.27620425     | 7.584E-09 | 1.13891  | up        | PREDICTED: probable leucine-rich repeat receptor-like serine/threonine-protein kinase At5g15730 [Sesamum indicum] |
| c46327.graph_c0 | 14.571728     | 20.0680031    | 15.2066804    | 5.21526508     | 5.70024178     | 5.35684709     | 3.295E-17 | -2.70532 | down      | PREDICTED: high affinity nitrate transporter 2.4-like [Sesamum indicum]                                           |
| c46328.graph_c0 | 1.56935355    | 1.90415154    | 1.99631092    | 13.8369408     | 14.6051774     | 13.6787332     | 1.297E-50 | 1.85159  | up        | PREDICTED: kinesin-13A [Sesamum indicum]                                                                          |
| c46332.graph_c0 | 0.93237986    | 1.28059293    | 0.89164281    | 8.3366501      | 8.22444111     | 8.07572196     | 8.88E-24  | 1.89919  | up        | PREDICTED: uncharacterized protein LOC105162624 [Sesamum indicum]                                                 |
| c46334.graph_c0 | 25.8960103    | 25.3758781    | 25.0302118    | 25.0014723     | 24.995635      | 24.6448614     | 7.485E-35 | -1.12196 | down      | PREDICTED: glycine-rich RNA-binding protein RZ1A [Populus euphratica]                                             |
| c46335.graph_c1 | 19.7252948    | 21.1200054    | 17.1379759    | 18.1669642     | 20.2077381     | 17.1732161     | 9.977E-20 | -1.15107 | down      | PREDICTED: phospholipid-transporting ATPase 1-like [Sesamum indicum]                                              |
| c46342.graph_c0 | 2.41318285    | 2.37663801    | 2.70090189    | 1.75388739     | 1.45588653     | 1.26957546     | 6.312E-11 | -1.83485 | down      | PREDICTED: protein GAMETE EXPRESSED 3-like [Solanum tuberosum]                                                    |
| c46342.graph_c1 | 18.536616     | 15.897535     | 18.1133421    | 18.9103458     | 16.6941371     | 17.8068419     | 1.75E-18  | -1.06703 | down      | PREDICTED: zinc finger CCHC domain-containing protein 8 [Sesamum indicum]                                         |
| c46345.graph_c0 | 1.21612964    | 1.58255164    | 1.40649726    | 0.44193801     | 0.23941715     | 0.28849424     | 7.66E-14  | -3.20814 | down      | -                                                                                                                 |
| c46348.graph_c0 | 8.25514268    | 6.34725615    | 7.84083252    | 54.345925      | 56.1352504     | 51.8668839     | 7.015E-26 | 1.76385  | up        | PREDICTED: transmembrane protein 55 homolog [Sesamum indicum]                                                     |
| c46350.graph_c0 | 4.14487504    | 4.35910274    | 4.51726596    | 32.9465214     | 31.0559642     | 30.7113417     | 5.63E-34  | 1.77101  | up        | PREDICTED: uncharacterized protein LOC105177167 [Sesamum indicum]                                                 |
| c46351.graph_c0 | 21.1344624    | 22.2418556    | 19.7547426    | 20.505578      | 19.9388154     | 18.1727176     | 2.058E-40 | -1.19702 | down      | PREDICTED: chromodomain-helicase-DNA-binding protein 1-like isoform X2 [Sesamum indicum]                          |
| c46352.graph_c0 | 17.3037824    | 15.1401669    | 18.1377962    | 17.0055299     | 16.6598338     | 18.72655       | 1.356E-11 | -1.04032 | down      | PREDICTED: CDP-diacylglycerol--serine O-phosphatidyltransferase 1-like [Sesamum indicum]                          |
| c46354.graph_c0 | 83.8131888    | 79.9199658    | 97.8790633    | 7.13023705     | 7.80954943     | 8.57656291     | 7.312E-61 | -4.56793 | down      | PREDICTED: uncharacterized protein LOC105172385 [Sesamum indicum]                                                 |
| c46354.graph_c1 | 6.14009796    | 5.77499656    | 7.20185625    | 2.45592081     | 3.73183341     | 3.1282128      | 6.194E-18 | -2.13034 | down      | PREDICTED: pentatricopeptide repeat-containing protein At4g22760 [Sesamum indicum]                                |
| c46355.graph_c0 | 64.4795694    | 65.6111541    | 65.9915949    | 24.5482078     | 24.7158685     | 26.2288899     | 1.66E-194 | -2.46755 | down      | PREDICTED: fimbrin-2 [Sesamum indicum]                                                                            |
| c46360.graph_c0 | 14.0195403    | 14.0785582    | 12.1836705    | 10.9077989     | 9.11154008     | 10.0998675     | 1.013E-31 | -1.50794 | down      | unnamed protein product [Coffea canephora]                                                                        |

| #ID             | 0 h-1<br>FPKM | 0 h-2<br>FPKM | 0 h-3<br>FPKM | 28 h-1<br>FPKM | 28 h-2<br>FPKM | 28 h-3<br>FPKM | FDR       | log2FC   | regulated | nr_annotation                                                                            |
|-----------------|---------------|---------------|---------------|----------------|----------------|----------------|-----------|----------|-----------|------------------------------------------------------------------------------------------|
| c46360.graph_c1 | 19.5923747    | 19.1431809    | 19.0582696    | 13.1049936     | 14.035182      | 13.2396553     | 6.958E-29 | -1.60771 | down      | PREDICTED: mitochondrial ubiquitin ligase activator of NFKB 1 [Sesamum indicum]          |
| c46363.graph_c0 | 1.71102938    | 1.80012755    | 1.43591216    | 9.63129406     | 9.47525772     | 9.25691334     | 5.314E-22 | 1.4311   | up        | PREDICTED: transcription termination factor 2 [Sesamum indicum]                          |
| c46364.graph_c0 | 0             | 0.05099425    | 0.03273204    | 3.27673461     | 2.75800215     | 2.62847023     | 1.462E-24 | 5.59177  | up        | PREDICTED: uncharacterized protein LOC105172001 isoform X1 [Sesamum indicum]             |
| c46365.graph_c0 | 14.5925212    | 14.5475124    | 14.5423421    | 12.6403347     | 11.3544085     | 13.2992306     | 2.325E-35 | -1.31802 | down      | PREDICTED: CDK5RAP3-like protein [Sesamum indicum]                                       |
| c46368.graph_c2 | 1.65880447    | 1.71490701    | 1.15317657    | 0              | 0              | 0              | 1.087E-44 | -Inf     | down      | PREDICTED: uncharacterized protein LOC104097920 [Nicotiana tomentosiformis]              |
| c46368.graph_c3 | 63.8863421    | 64.8428042    | 59.6003692    | 52.0025969     | 50.1827158     | 50.6092732     | 1.736E-66 | -1.39127 | down      | PREDICTED: LOW QUALITY PROTEIN: nuclear pore complex protein NUP1-like [Sesamum indicum] |
| c46369.graph_c0 | 20.9958161    | 20.5922576    | 19.2587759    | 23.8913526     | 21.0149636     | 19.4532236     | 6.504E-16 | -1.00904 | down      | PREDICTED: retrovirus-related Pol polyprotein from transposon TNT 1-94 [Sesamum indicum] |
| c46372.graph_c1 | 69.8299143    | 77.8195245    | 81.8511504    | 46.4184769     | 48.5331032     | 44.7792982     | 1.001E-27 | -1.80851 | down      | hypothetical protein MIMGU_mgv1a026333mg, partial [Erythranthe guttata]                  |
| c46373.graph_c0 | 0             | 0             | 0.0963358     | 4.249886       | 3.29609815     | 2.57867425     | 1.013E-11 | 5.58397  | up        | PREDICTED: uncharacterized protein LOC104110773 [Nicotiana tomentosiformis]              |
| c46375.graph_c0 | 17.5890931    | 17.022043     | 15.740387     | 11.9467711     | 11.6190963     | 11.0152736     | 3.95E-76  | -1.63152 | down      | PREDICTED: ubiquitin carboxyl-terminal hydrolase 8-like [Sesamum indicum]                |
| c46376.graph_c0 | 22.4577305    | 23.0586945    | 23.165646     | 173.616798     | 155.706269     | 159.377436     | 2.494E-88 | 1.74     | up        | hypothetical protein MIMGU_mgv1a025545mg [Erythranthe guttata]                           |
| c46380.graph_c0 | 5.10847992    | 4.67528712    | 3.65741942    | 4.24321573     | 4.35801954     | 3.54899012     | 2.388E-06 | -1.23309 | down      | -                                                                                        |
| c46382.graph_c0 | 6.84045399    | 3.22801459    | 4.77185228    | 0              | 0              | 0              | 9.465E-17 | -Inf     | down      | -                                                                                        |
| c46385.graph_c0 | 0.6459963     | 0.43109545    | 0.79938524    | 9.07712354     | 10.6451085     | 9.70553896     | 5.04E-45  | 2.87602  | up        | PREDICTED: uncharacterized protein LOC105177282 [Sesamum indicum]                        |
| c46386.graph_c0 | 2.77812002    | 1.80979329    | 1.41666437    | 0              | 0              | 0              | 2.008E-18 | -Inf     | down      | --                                                                                       |
| c46388.graph_c0 | 13.0316093    | 12.525181     | 13.7451675    | 70.4480215     | 73.4840304     | 71.522843      | 1.753E-56 | 1.36325  | up        | hypothetical protein MIMGU_mgv1a008721mg [Erythranthe guttata]                           |
| c46390.graph_c0 | 2.3626663     | 1.91215365    | 2.77772657    | 13.1162731     | 12.3045997     | 11.8356557     | 3.209E-10 | 1.30752  | up        | hypothetical protein PHAVU_011G040900g [Phaseolus vulgaris]                              |
| c46391.graph_c0 | 70.1259689    | 67.290978     | 59.8748322    | 49.0478054     | 52.8304025     | 52.3813918     | 2.662E-66 | -1.44349 | down      | hypothetical protein MIMGU_mgv1a005259mg [Erythranthe guttata]                           |
| c46391.graph_c1 | 5.65013405    | 4.88102581    | 4.87358427    | 26.5796452     | 24.6084241     | 25.8658705     | 3.347E-21 | 1.23365  | up        | unnamed protein product [Coffea canephora]                                               |
| c46392.graph_c0 | 89.0341303    | 90.9149978    | 91.0031045    | 64.6465458     | 64.7353142     | 63.5717824     | 6.046E-84 | -1.58065 | down      | PREDICTED: tobamovirus multiplication protein 1 [Sesamum indicum]                        |
| c46394.graph_c0 | 2.28902889    | 3.27331572    | 3.99202588    | 2.49547951     | 2.41412574     | 2.76353765     | 0.0018307 | -1.41252 | down      | -                                                                                        |
| c46398.graph_c0 | 0.1280409     | 0.08544608    | 0.10969175    | 5.24234553     | 4.7333465      | 4.10052784     | 1.937E-20 | 4.35454  | up        | PREDICTED: squalene synthase-like [Sesamum indicum]                                      |
| c46400.graph_c0 | 0.32591014    | 0.23561524    | 0.37227328    | 2.36869613     | 2.67338815     | 2.17981027     | 9.043E-10 | 1.857    | up        | PREDICTED: flavin-containing monooxygenase FMO GS-OX-like 2 isoform X1 [Sesamum indicum] |
| c46401.graph_c0 | 7.2657167     | 4.94563471    | 5.60204018    | 5.06945378     | 3.05149431     | 4.99843141     | 9.659E-05 | -1.52776 | down      | -                                                                                        |

| #ID             | 0 h-1<br>FPKM | 0 h-2<br>FPKM | 0 h-3<br>FPKM | 28 h-1<br>FPKM | 28 h-2<br>FPKM | 28 h-3<br>FPKM | FDR       | log2FC   | regulated | nr_annotation                                                                                     |
|-----------------|---------------|---------------|---------------|----------------|----------------|----------------|-----------|----------|-----------|---------------------------------------------------------------------------------------------------|
| c46401.graph_c5 | 29.3382453    | 29.3676231    | 27.239682     | 18.8255948     | 17.9690469     | 18.7473386     | 1.706E-60 | -1.71928 | down      | -                                                                                                 |
| c46403.graph_c0 | 18.3709167    | 18.5904106    | 15.4609532    | 12.9949611     | 11.5574527     | 12.4438892     | 2.199E-40 | -1.59091 | down      | PREDICTED: LOW QUALITY PROTEIN: uncharacterized protein LOC105173575 [Sesamum indicum]            |
| c46404.graph_c0 | 23.3969713    | 24.9736908    | 23.9803169    | 25.5437925     | 26.1185253     | 25.3851201     | 3.737E-32 | -1.00005 | down      | PREDICTED: kanadaplin [Sesamum indicum]                                                           |
| c46405.graph_c1 | 60.5520054    | 59.3129529    | 55.7675971    | 37.2316575     | 36.7666474     | 36.3308711     | 2.802E-97 | -1.76034 | down      | PREDICTED: protein RTF2 homolog [Sesamum indicum]                                                 |
| c46407.graph_c0 | 142.081968    | 140.840865    | 136.576304    | 102.403421     | 104.639069     | 102.450225     | 1.55E-78  | -1.52888 | down      | PREDICTED: ras-related protein Rab11D [Sesamum indicum]                                           |
| c46411.graph_c0 | 15.918535     | 17.1278057    | 15.2293179    | 11.6714334     | 13.0001936     | 11.7279913     | 8.543E-43 | -1.49747 | down      | PREDICTED: pentatricopeptide repeat-containing protein At1g80150, mitochondrial [Sesamum indicum] |
| c46412.graph_c0 | 1.83850493    | 1.86955776    | 1.65003606    | 12.9379527     | 11.8541121     | 10.5399568     | 2.124E-20 | 1.63142  | up        | PREDICTED: uncharacterized protein LOC105174617 [Sesamum indicum]                                 |
| c46416.graph_c0 | 616.78973     | 611.26002     | 629.19279     | 547.986485     | 536.901984     | 586.868361     | 7.481E-37 | -1.24224 | down      | PREDICTED: xylose isomerase-like [Sesamum indicum]                                                |
| c46430.graph_c0 | 0.62881709    | 0.68666918    | 0.36729766    | 25.9670815     | 22.5455197     | 21.7991675     | 2.396E-65 | 4.30049  | up        | PREDICTED: baicalein 7-O-glucuronosyltransferase-like [Sesamum indicum]                           |
| c46434.graph_c0 | 0.30644173    | 0.10224953    | 0.42004241    | 2.96960111     | 2.86896037     | 2.58067632     | 5.284E-13 | 2.24594  | up        | PREDICTED: putative ion channel POLLUX-like 2 isoform X4 [Sesamum indicum]                        |
| c46435.graph_c0 | 5.03191463    | 4.57255338    | 4.08150814    | 1.45249168     | 1.12411183     | 1.67200869     | 1.936E-36 | -2.77418 | down      | PREDICTED: putative beta-glucosidase 41 isoform X1 [Sesamum indicum]                              |
| c46436.graph_c0 | 10.6985563    | 10.2197027    | 10.9984547    | 44.8321708     | 47.4196925     | 44.7766266     | 4.767E-27 | 1.01084  | up        | PREDICTED: cyprosin-like [Sesamum indicum]                                                        |
| c46439.graph_c0 | 219.066072    | 233.960244    | 228.421032    | 52.2230213     | 52.173652      | 51.3460019     | 0         | -3.22042 | down      | PREDICTED: uncharacterized protein LOC105159071 [Sesamum indicum]                                 |
| c46440.graph_c0 | 24.9885251    | 27.6370659    | 24.3469561    | 18.9758034     | 19.6541431     | 20.7641195     | 1.824E-53 | -1.46361 | down      | PREDICTED: uncharacterized protein DDB_G0271670 isoform X1 [Sesamum indicum]                      |
| c46442.graph_c0 | 0             | 0             | 0.04533257    | 14.7425697     | 14.8158978     | 13.2641802     | 7.015E-91 | 8.75292  | up        | PREDICTED: heat stress transcription factor C-1-like [Sesamum indicum]                            |
| c46445.graph_c0 | 53.0146281    | 54.763369     | 53.855738     | 21.9784734     | 23.0970227     | 20.4643986     | 5.25E-137 | -2.39345 | down      | PREDICTED: DNA-directed RNA polymerase III subunit RPC9-like [Sesamum indicum]                    |
| c46448.graph_c1 | 80.2274773    | 88.015929     | 81.8090286    | 36.5731963     | 37.5661427     | 36.2333928     | 9.02E-136 | -2.27051 | down      | hypothetical protein MIMGU_mgv1a021536mg, partial [Erythranthe guttata]                           |
| c46448.graph_c2 | 194.303433    | 192.913263    | 192.615114    | 193.674767     | 190.49085      | 197.906756     | 1.537E-37 | -1.08473 | down      | PREDICTED: pentatricopeptide repeat-containing protein At4g21065-like [Sesamum indicum]           |
| c46449.graph_c0 | 1.93984296    | 1.51965816    | 1.73410435    | 8.73504359     | 7.74855826     | 9.20351762     | 1.281E-07 | 1.21721  | up        | hypothetical protein POPTR_0001s04230g [Populus trichocarpa]                                      |
| c46450.graph_c0 | 3.20957617    | 3.23125439    | 3.31850887    | 39.8838325     | 42.3905167     | 39.3820416     | 7.68E-147 | 2.54864  | up        | PREDICTED: probable metal-nicotianamine transporter YSL7 [Sesamum indicum]                        |
| c46452.graph_c0 | 27.9603367    | 30.4089475    | 29.3915016    | 21.6395572     | 20.001332      | 22.7966609     | 2.883E-51 | -1.53612 | down      | PREDICTED: TATA-box-binding protein-like isoform X4 [Sesamum indicum]                             |
| c46453.graph_c0 | 1.32540352    | 1.71369384    | 1.987062      | 0.72247173     | 0.97848635     | 0.91704827     | 9.957E-08 | -2.03603 | down      | acidic class III chitinase [Rehmannia glutinosa]                                                  |

| #ID             | 0 h-1<br>FPKM | 0 h-2<br>FPKM | 0 h-3<br>FPKM | 28 h-1<br>FPKM | 28 h-2<br>FPKM | 28 h-3<br>FPKM | FDR       | log2FC   | regulated | nr_annotation                                                                                              |
|-----------------|---------------|---------------|---------------|----------------|----------------|----------------|-----------|----------|-----------|------------------------------------------------------------------------------------------------------------|
| c46454.graph_c0 | 18.3829866    | 20.823987     | 18.5939083    | 8.86967438     | 7.29887181     | 8.91718946     | 1.343E-73 | -2.2939  | down      | PREDICTED: kinesin-like protein KIF5A isoform X1 [Sesamum indicum]                                         |
| c46459.graph_c0 | 20.2472482    | 15.3482211    | 21.7241974    | 10.4294911     | 10.3198384     | 14.8057288     | 2.281E-08 | -1.77951 | down      | -                                                                                                          |
| c46459.graph_c1 | 12.7457258    | 13.2310253    | 14.8116585    | 9.43506671     | 9.26761831     | 8.70213226     | 1.19E-24  | -1.66653 | down      | PREDICTED: putative lipid phosphate phosphatase 3, chloroplastic [Sesamum indicum]                         |
| c46462.graph_c0 | 4.48746923    | 5.98928366    | 4.08465773    | 2.5140473      | 2.20859903     | 1.55244265     | 5.491E-12 | -2.30469 | down      | -                                                                                                          |
| c46462.graph_c2 | 3.59510361    | 2.29704483    | 2.01504116    | 1.52882481     | 1.1545042      | 0.90727895     | 8.363E-06 | -2.22436 | down      | PREDICTED: restin homolog [Sesamum indicum]                                                                |
| c46468.graph_c0 | 4.39359714    | 3.17471282    | 3.62686615    | 1.92440356     | 2.2721886      | 1.94992998     | 2.128E-15 | -1.9543  | down      | hypothetical protein MIMGU_mgv1a005/14mg [Erythranthe guttata]                                             |
| c46470.graph_c0 | 1.60120634    | 1.14486408    | 1.69018255    | 13.4662215     | 13.0969095     | 14.1762982     | 1.952E-18 | 2.10709  | up        | hypothetical protein MIMGU_mgv1a002/11mg [Erythranthe guttata]                                             |
| c46471.graph_c0 | 52.0607448    | 49.9500884    | 48.1918836    | 6.0195942      | 6.65043756     | 6.98654779     | 0         | -4.02308 | down      | hypothetical protein AMIK_s00109p00059550 [Amborella trichopoda]                                           |
| c46474.graph_c0 | 0.56489301    | 0             | 1.08886483    | 5.85049407     | 5.28244761     | 5.69524502     | 1.296E-06 | 2.24104  | up        | PREDICTED: non-specific lipid-transfer protein 1-like [Pyrus x bretschneideri]                             |
| c46476.graph_c0 | 0.59241617    | 0.59300939    | 0.56390981    | 0.4465115      | 0.35996252     | 0.32531227     | 4.34E-06  | -1.71888 | down      | PREDICTED: uncharacterized protein LOC105176110 [Sesamum indicum]                                          |
| c46477.graph_c0 | 1.17490262    | 1.17607911    | 0.75489819    | 8.79529829     | 7.45302789     | 6.57301074     | 8.93E-12  | 1.79139  | up        | PREDICTED: UPF0554 protein isoform X2 [Sesamum indicum]                                                    |
| c46479.graph_c0 | 4.27347372    | 3.97219917    | 3.35596734    | 27.0906646     | 29.0007372     | 27.2550557     | 1.368E-42 | 1.75699  | up        | hypothetical protein MIMGU_mgv1a004800mg [Erythranthe guttata]                                             |
| c46480.graph_c0 | 4.44555629    | 4.50000793    | 4.36477165    | 24.559266      | 23.2891865     | 23.5357095     | 9.627E-32 | 1.33276  | up        | PREDICTED: gamma-tubulin complex component 2 [Sesamum indicum]                                             |
| c46484.graph_c0 | 1.407838      | 2.18748903    | 1.21508568    | 35.2472437     | 39.8363512     | 31.7522564     | 2.91E-57  | 3.38469  | up        | PREDICTED: formin-like protein 1 [Nelumbo nucifera]                                                        |
| c46485.graph_c0 | 2.54937237    | 1.6769794     | 1.26361714    | 0.31763471     | 0.43019154     | 0.21598944     | 5.261E-08 | -3.59518 | down      | PREDICTED: heat shock protein 81-1 [Musa acuminata subsp. malaccensis]                                     |
| c46487.graph_c0 | 2.13343651    | 2.80293934    | 2.91289728    | 11.9684573     | 12.8626723     | 12.8897541     | 1.613E-12 | 1.17107  | up        | PREDICTED: putative bifunctional dihydrofolate reductase-thymidylate synthase isoform X1 [Sesamum indicum] |
| c46488.graph_c0 | 32.5373723    | 33.8236084    | 31.8336271    | 26.651759      | 24.6886525     | 23.8570177     | 4.081E-68 | -1.47538 | down      | PREDICTED: pentatricopeptide repeat-containing protein At5g67570, chloroplastic [Sesamum indicum]          |
| c46488.graph_c1 | 19.0863946    | 21.3799718    | 18.6870649    | 12.7158914     | 14.3142954     | 16.0357346     | 9.552E-11 | -1.54711 | down      | -                                                                                                          |
| c46488.graph_c2 | 34.2171521    | 37.567284     | 34.876408     | 28.1244842     | 28.1357069     | 28.0169587     | 8.963E-58 | -1.43036 | down      | PREDICTED: F-box/kelch-repeat protein SKIP11-like isoform X1 [Sesamum indicum]                             |
| c46489.graph_c0 | 12.7370054    | 11.5805676    | 10.8997918    | 9.11569679     | 10.5300831     | 9.28554794     | 4.676E-35 | -1.3728  | down      | PREDICTED: dr1-associated corepressor [Sesamum indicum]                                                    |
| c46493.graph_c0 | 21.072462     | 22.2695106    | 19.7666885    | 111.796674     | 102.556022     | 101.545157     | 3.977E-48 | 1.23382  | up        | PREDICTED: probable receptor-like protein kinase At1g67000 [Sesamum indicum]                               |
| c46493.graph_c1 | 0.70953726    | 1.04993146    | 1.38749658    | 10.5155426     | 9.67674719     | 9.75150988     | 1.13E-25  | 2.15191  | up        | PREDICTED: uncharacterized protein LOC105170658 [Sesamum indicum]                                          |
| c46496.graph_c0 | 0.17937402    | 0.29925607    | 0.30733696    | 1.89033609     | 1.64794121     | 2.05666508     | 1.459E-05 | 1.73671  | up        | PREDICTED: pentatricopeptide repeat-containing protein At3g12770 [Sesamum indicum]                         |

| #ID             | 0 h-1<br>FPKM | 0 h-2<br>FPKM | 0 h-3<br>FPKM | 28 h-1<br>FPKM | 28 h-2<br>FPKM | 28 h-3<br>FPKM | FDR       | log2FC   | regulated | nr_annotation                                                                                          |
|-----------------|---------------|---------------|---------------|----------------|----------------|----------------|-----------|----------|-----------|--------------------------------------------------------------------------------------------------------|
| c46499.graph_c0 | 0.5436114     | 0.49468704    | 0.57155087    | 2.80157305     | 2.72413916     | 2.3153692      | 0.0030126 | 1.19182  | up        | PREDICTED: uncharacterized protein LOC105177245 [Sesamum indicum]                                      |
| c46499.graph_c1 | 0.24637613    | 0.57545329    | 0.36937026    | 5.55100725     | 5.14677133     | 5.69849958     | 5.49E-15  | 2.69101  | up        | PREDICTED: probable serine incorporator [Sesamum indicum]                                              |
| c46504.graph_c0 | 19.0700761    | 17.1340034    | 17.1648575    | 15.0811687     | 15.3121003     | 13.8381465     | 3.72E-51  | -1.36082 | down      | PREDICTED: uncharacterized protein LOC105157171 isoform X1 [Sesamum indicum]                           |
| c46506.graph_c0 | 2.8602521     | 2.12265512    | 1.90113992    | 0              | 0              | 0              | 3.746E-39 | -Inf     | down      | putative Trypsin [Glarea lozoyensis 74030]                                                             |
| c46507.graph_c0 | 50.8021785    | 56.2191993    | 54.3379608    | 24.3784695     | 26.1869121     | 25.4637575     | 1.391E-85 | -2.17682 | down      | PREDICTED: mitogen-activated protein kinase kinase kinase YODA-like [Sesamum indicum]                  |
| c46508.graph_c0 | 154.12016     | 149.047117    | 154.001047    | 64.0356021     | 64.1447502     | 62.3377428     | 2.19E-149 | -2.35357 | down      | hypothetical protein VITISV_004365 [Vitis vinifera]                                                    |
| c46509.graph_c0 | 0.11284093    | 0.22590785    | 0.09667004    | 1.25751948     | 1.28352073     | 1.09304686     | 6.831E-08 | 1.97364  | up        | PREDICTED: probable LRR receptor-like serine/threonine-protein kinase At3g47570 [Solanum lycopersicum] |
| c46518.graph_c0 | 68.9973951    | 67.0993531    | 70.4304216    | 37.0675516     | 40.0078833     | 40.0843771     | 3.97E-117 | -1.90864 | down      | PREDICTED: uncharacterized protein LOC105175391 [Sesamum indicum]                                      |
| c46523.graph_c1 | 1.05373545    | 0.86048707    | 0.78394787    | 12.5558904     | 13.6842174     | 13.4359178     | 8.619E-49 | 2.79109  | up        | PREDICTED: glutathione synthetase, chloroplastic isoform X2 [Sesamum indicum]                          |
| c46525.graph_c1 | 31.4372141    | 33.0560381    | 29.5160067    | 16.8481598     | 15.1908526     | 15.0083522     | 3.92E-140 | -2.08848 | down      | PREDICTED: ion protease homolog 2, peroxisomal [Sesamum indicum]                                       |
| c46529.graph_c0 | 0.63351753    | 0.34146641    | 1.12720861    | 4.46269598     | 5.0207554      | 4.73976072     | 3.679E-07 | 1.657    | up        | PREDICTED: uncharacterized protein LOC105164965 [Sesamum indicum]                                      |
| c46530.graph_c0 | 5.36334203    | 6.15822916    | 5.6758527     | 2.17831987     | 3.51957013     | 3.27432594     | 1.181E-08 | -2.02925 | down      | PREDICTED: diacylglycerol kinase 3-like [Sesamum indicum]                                              |
| c46530.graph_c1 | 7.97107497    | 6.12677575    | 6.95070684    | 2.2759516      | 3.64290297     | 3.96756465     | 1.569E-11 | -2.17849 | down      | PREDICTED: diacylglycerol kinase 3-like [Sesamum indicum]                                              |
| c46530.graph_c2 | 2.96929877    | 2.76490425    | 2.9874598     | 2.49265361     | 3.23245205     | 2.86669025     | 7.169E-09 | -1.11271 | down      | PREDICTED: glutamate receptor 2.8-like [Sesamum indicum]                                               |
| c46532.graph_c0 | 48.1967446    | 48.4643018    | 46.873326     | 31.2873697     | 31.0529529     | 33.3906932     | 2.74E-49  | -1.67416 | down      | PREDICTED: uncharacterized protein At1g04910 [Eucalyptus orandiel]                                     |
| c46533.graph_c0 | 0.23714751    | 0.71215492    | 1.21897574    | 23.6129694     | 25.2108627     | 26.1594612     | 4.983E-19 | 4.00552  | up        | Cell wall-associated hydrolase, partial [Medicago truncatula]                                          |
| c46533.graph_c1 | 0             | 0.92731807    | 1.19044838    | 8.41619029     | 10.638643      | 12.3615766     | 1.975E-07 | 2.78288  | up        | -                                                                                                      |
| c46537.graph_c0 | 0.23128401    | 0.08681835    | 0.03715114    | 1.42881504     | 1.29008601     | 1.33735749     | 8.095E-07 | 2.44116  | up        | hypothetical protein MIMGU_mgv1a001125mg [Erythranthe outtatal]                                        |
| c46540.graph_c0 | 11.6547932    | 11.5366921    | 12.3446731    | 9.89340192     | 10.0643042     | 10.4333076     | 4.461E-48 | -1.3168  | down      | PREDICTED: L-ascorbate oxidase homolog [Sesamum indicum]                                               |
| c46546.graph_c0 | 0.65574649    | 0.41025195    | 0.4213301     | 4.88507588     | 4.35697567     | 4.08340598     | 3.348E-06 | 2.07724  | up        | PREDICTED: vacuolar cation/proton exchanger 5-like [Sesamum indicum]                                   |
| c46546.graph_c1 | 0.26276986    | 0.4383883     | 0.11255656    | 2.16443567     | 2.29915585     | 2.90897243     | 2.595E-05 | 2.09965  | up        | PREDICTED: vacuolar cation/proton exchanger 5-like [Sesamum indicum]                                   |
| c46547.graph_c0 | 2.21648948    | 1.69943665    | 1.81804898    | 1.30245548     | 1.39262587     | 1.65012603     | 5.534E-06 | -1.48772 | down      | PREDICTED: NAC domain-containing protein 7 [Sesamum indicum]                                           |
| c46550.graph_c1 | 7.03776048    | 7.31294921    | 7.16619514    | 4.92031503     | 5.92877104     | 5.38694769     | 5.592E-30 | -1.49715 | down      | PREDICTED: G-type lectin S-receptor-like serine/threonine-protein kinase At4g27290 [Sesamum indicum]   |
| c46550.graph_c2 | 0             | 0             | 0             | 0.60805462     | 0.65195687     | 0.99233521     | 4.69E-09  | Inf      | up        | PREDICTED: uncharacterized protein LOC105175473 [Sesamum indicum]                                      |

| #ID             | 0 h-1<br>FPKM | 0 h-2<br>FPKM | 0 h-3<br>FPKM | 28 h-1<br>FPKM | 28 h-2<br>FPKM | 28 h-3<br>FPKM | FDR       | log2FC   | regulated | nr_annotation                                                                      |
|-----------------|---------------|---------------|---------------|----------------|----------------|----------------|-----------|----------|-----------|------------------------------------------------------------------------------------|
| c46552.graph_c1 | 141.748757    | 144.262824    | 143.286029    | 95.9515855     | 94.2470771     | 88.7622601     | 1.91E-97  | -1.71287 | down      | PREDICTED: uncharacterized protein LOC105165908 isoform X2 [Sesamum indicum]       |
| c46558.graph_c0 | 31.4553008    | 30.3819986    | 32.3167843    | 19.7961381     | 19.9951458     | 21.5301903     | 7.585E-73 | -1.70927 | down      | -                                                                                  |
| c46559.graph_c0 | 0             | 0.95831244    | 1.53779691    | 25.3966715     | 19.6325455     | 17.0329944     | 1.032E-12 | 3.5232   | up        | -                                                                                  |
| c46560.graph_c0 | 1.82739429    | 1.52935134    | 2.27128143    | 15.5022201     | 15.7073651     | 15.5811429     | 5.794E-35 | 1.96132  | up        | hypothetical protein L484_026123 [Morus notabilis]                                 |
| c46562.graph_c0 | 2.91953347    | 2.45277636    | 2.44531495    | 12.8829649     | 12.0255484     | 13.9289222     | 2.192E-16 | 1.22461  | up        | hypothetical protein MIMGU_mgv1a0057401mg, partial [Erythranthe guttata]           |
| c46564.graph_c0 | 4.22969034    | 3.38197726    | 2.75080197    | 15.0519146     | 14.4028492     | 14.6530328     | 4.973E-13 | 1.00415  | up        | PREDICTED: probable methyltransferase PMT28 isoform X2 [Sesamum indicum]           |
| c46568.graph_c0 | 31.5271648    | 32.5024765    | 31.6694659    | 23.0919189     | 25.1682907     | 25.5524257     | 8.326E-70 | -1.46496 | down      | PREDICTED: uncharacterized protein LOC105175670 isoform X1 [Sesamum indicum]       |
| c46569.graph_c0 | 3.14319745    | 2.81762229    | 3.37599191    | 0.06819277     | 0.33864423     | 0.25040135     | 8.323E-41 | -4.92039 | down      | PREDICTED: U-box domain-containing protein 55 [Sesamum indicum]                    |
| c46569.graph_c1 | 1.85324107    | 2.66670167    | 1.04190107    | 0.21045702     | 0.03800459     | 0.24042369     | 7.89E-07  | -4.58699 | down      | PREDICTED: U-box domain-containing protein 55 [Sesamum indicum]                    |
| c46571.graph_c1 | 0.99602202    | 1.20153618    | 1.41120237    | 6.57081244     | 6.87135395     | 6.63400404     | 1.252E-11 | 1.38114  | up        | PREDICTED: uncharacterized protein LOC105165701 isoform X1 [Sesamum indicum]       |
| c46572.graph_c0 | 722.003728    | 756.032668    | 673.132973    | 74.0642428     | 80.9865635     | 75.7792371     | 0         | -4.30991 | down      | PREDICTED: short-chain type dehydrogenase/reductase [Sesamum indicum]              |
| c46574.graph_c0 | 196.454845    | 189.888292    | 187.093228    | 90.3685122     | 86.7670639     | 88.4044823     | 3.61E-157 | -2.20067 | down      | hypothetical protein MIMGU_mgv1a002199mg [Erythranthe guttata]                     |
| c46576.graph_c0 | 120.374546    | 128.847253    | 117.145289    | 47.5508399     | 44.6187        | 39.4764326     | 8.75E-205 | -2.56728 | down      | PREDICTED: EIN5-binding F-box protein 1-like [Sesamum indicum]                     |
| c46579.graph_c0 | 0             | 0             | 0             | 4.1175438      | 7.435512       | 7.97972004     | 3.512E-11 | Inf      | up        | 60S ribosomal protein L11 [Candida albicans WO-1]                                  |
| c46581.graph_c0 | 5.91682064    | 2.01763856    | 1.5039591     | 0              | 0              | 0              | 1.244E-05 | -Inf     | down      | PREDICTED: photosystem II 22 kDa protein, chloroplastic [Phoenix dactylifera]      |
| c46582.graph_c0 | 0.66518186    | 0.52566942    | 0.53986422    | 9.26189071     | 9.35051073     | 9.63389839     | 2.254E-30 | 2.94043  | up        | PREDICTED: uncharacterized protein LOC105162786 [Sesamum indicum]                  |
| c46584.graph_c0 | 86.9018845    | 85.9442331    | 86.5525282    | 30.8068069     | 31.2399343     | 32.2558043     | 2.23E-201 | -2.55015 | down      | PREDICTED: phosphoglucan phosphatase DSP4, amyloplastic [Sesamum indicum]          |
| c46585.graph_c0 | 2.69711072    | 1.52171192    | 1.63842264    | 23.1308854     | 19.3403659     | 21.375718      | 7.046E-32 | 2.36146  | up        | PREDICTED: uncharacterized protein LOC105160704 isoform X2 [Sesamum indicum]       |
| c46587.graph_c0 | 32.6414798    | 31.2751334    | 31.748875     | 6.65179393     | 6.56807915     | 6.60428056     | 3.38E-210 | -3.36103 | down      | PREDICTED: inositol-tetrakisphosphate 1-kinase 2-like isoform X1 [Sesamum indicum] |
| c46589.graph_c0 | 0.22660799    | 0.34025236    | 0.33973362    | 1.92146947     | 2.18102567     | 1.63509926     | 0.0001926 | 1.5663   | up        | PREDICTED: uncharacterized protein LOC105173906 [Sesamum indicum]                  |
| c46589.graph_c1 | 70.948567     | 73.5744107    | 66.2065761    | 57.060663      | 55.9450361     | 55.8348365     | 3.153E-68 | -1.40931 | down      | PREDICTED: transcription factor GTE7-like [Sesamum indicum]                        |
| c46590.graph_c0 | 8.74249731    | 7.52795836    | 7.85203856    | 3.34780469     | 3.51626456     | 2.84328257     | 1.41E-38  | -2.40366 | down      | PREDICTED: uncharacterized protein LOC104210866 [Nicotiana sylvestris]             |



| #ID             | 0 h-1<br>FPKM | 0 h-2<br>FPKM | 0 h-3<br>FPKM | 28 h-1<br>FPKM | 28 h-2<br>FPKM | 28 h-3<br>FPKM | FDR       | log2FC   | regulated | nr_annotation                                                                             |
|-----------------|---------------|---------------|---------------|----------------|----------------|----------------|-----------|----------|-----------|-------------------------------------------------------------------------------------------|
| c46592.graph_c0 | 0.16761703    | 0.06711395    | 0.0430789     | 6.16424829     | 4.75177653     | 5.84511076     | 6.825E-31 | 4.83977  | up        | hypothetical protein MIMGU_mgv1a019962mg [Erythranthe<br>cuffata]                         |
| c46601.graph_c0 | 0.09612178    | 0             | 0.12352029    | 0.85579423     | 0.52039111     | 0.52730369     | 0.0024054 | 2.01527  | up        | PREDICTED: zinc finger MYM-type protein 1-like [Setaria italica]                          |
| c46603.graph_c3 | 130.042218    | 130.879217    | 125.265333    | 130.61699      | 134.751588     | 132.963203     | 1.658E-38 | -1.04538 | down      | PREDICTED: DEAD-box ATP-dependent RNA helicase 53-like<br>[Sesamum indicum]               |
| c46604.graph_c0 | 0.25677747    | 0.42060206    | 0.44995802    | 6.68454616     | 7.95034029     | 6.83893485     | 8.791E-38 | 3.15497  | up        | PREDICTED: carboxy-terminal kinesin 2-like [Sesamum indicum]                              |
| c46615.graph_c0 | 0.74333743    | 0.59526541    | 0.68229859    | 4.52269239     | 4.36230897     | 4.69811966     | 4.537E-12 | 1.65906  | up        | hypothetical protein MIMGU_mgv1a001556mg [Erythranthe<br>cuffata]                         |
| c46617.graph_c0 | 150.514395    | 151.506556    | 164.671464    | 12.5073902     | 13.5761175     | 14.0418063     | 2.79E-185 | -4.63135 | down      | BnaC09g43060D [Brassica napus]                                                            |
| c46618.graph_c0 | 12.0894006    | 5.22443884    | 4.92751455    | 0              | 0              | 0              | 1.372E-11 | -Inf     | down      | PREDICTED: mitochondrial uncoupling protein 5-like [Musa<br>acuminata subsp. malaccensis] |
| c46620.graph_c0 | 8.96307387    | 5.17731354    | 5.13585263    | 0              | 0              | 0              | 3.747E-27 | -Inf     | down      | PREDICTED: alpha carbonic anhydrase 1, chloroplastic-like<br>[Camelina sativa]            |
| c46622.graph_c0 | 2.18972226    | 2.23036958    | 2.12275142    | 15.1609174     | 16.1594411     | 14.9912331     | 2.049E-22 | 1.73303  | up        | PREDICTED: uncharacterized protein LOC105163866 [Sesamum<br>indicum]                      |
| c46624.graph_c0 | 1.4546899     | 1.12733926    | 1.20602201    | 0.13642068     | 0.15396885     | 0.1391477      | 3.015E-20 | -4.22959 | down      | PREDICTED: rotipolyglutamate synthase-like [Solanum<br>tuberosum]                         |
| c46629.graph_c0 | 6.26704428    | 6.63843363    | 6.73247198    | 4.28975448     | 4.96123657     | 4.77864227     | 2.019E-22 | -1.57647 | down      | Uncharacterized protein TCM_005954 [Theobroma cacao]                                      |
| c46635.graph_c0 | 0.34570825    | 0.27684354    | 0.53309855    | 2.91460168     | 3.13071089     | 2.87035141     | 3.08E-05  | 1.84975  | up        | hypothetical protein MIMGU_mgv1a014960mg [Erythranthe<br>cuffata]                         |
| c46636.graph_c0 | 78.3586473    | 83.2555768    | 63.7277783    | 46.1407856     | 41.1784648     | 41.5736783     | 1.874E-24 | -1.89382 | down      | PREDICTED: ABC transporter B family member 4-like [Sesamum<br>indicum]                    |
| c46638.graph_c0 | 16.0591194    | 14.1359697    | 14.2818404    | 136.354811     | 116.759098     | 139.473569     | 5.068E-37 | 2.05317  | up        | unknown [Populus trichocarpa x Populus deltoides]                                         |
| c46643.graph_c0 | 0.73854566    | 0.42564906    | 0.4313911     | 0              | 0              | 0              | 2.033E-16 | -Inf     | down      | alpha-2 macroglobulin family-like protein [Micromonas sp.<br>RCC799]                      |
| c46644.graph_c0 | 4.35236168    | 2.59328566    | 3.72863805    | 0.30126394     | 0.47602291     | 0.12291446     | 4.741E-17 | -4.6622  | down      | PREDICTED: protein ROOT HAIR DEFECTIVE 3-like [Sesamum<br>indicum]                        |
| c46648.graph_c0 | 10.2794665    | 11.6319024    | 11.1993769    | 8.08011056     | 9.05532069     | 10.7016948     | 2.772E-17 | -1.34058 | down      | PREDICTED: ABC transporter G family member 12-like [Sesamum<br>indicum]                   |
| c46653.graph_c0 | 0.42861882    | 0.58227945    | 0.29506723    | 3.60470468     | 3.8875707      | 3.94911472     | 1.15E-17  | 2.04587  | up        | PREDICTED: DNA mismatch repair protein MSH1, mitochondrial-<br>like [Sesamum indicum]     |
| c46657.graph_c2 | 106.950267    | 103.157921    | 108.30996     | 32.1304621     | 33.9298481     | 33.1490392     | 7.26E-226 | -2.77323 | down      | PREDICTED: putative clathrin assembly protein At5g35200<br>[Sesamum indicum]              |
| c46659.graph_c0 | 2.77244759    | 3.11784399    | 2.90294474    | 0.39802448     | 0.29199526     | 0.50747613     | 1.472E-40 | -3.96498 | down      | PREDICTED: probable serine/threonine-protein kinase At5g41260<br>[Sesamum indicum]        |
| c46660.graph_c0 | 9.9894918     | 9.84014027    | 9.6148836     | 7.20245403     | 6.79042804     | 6.8920721      | 3.071E-49 | -1.58564 | down      | PREDICTED: GDP-mannose transporter GONST1-like isoform X2<br>[Sesamum indicum]            |
| c46667.graph_c1 | 10.6262266    | 10.5232254    | 11.7293995    | 8.87824181     | 9.05922253     | 9.26443512     | 6.94E-28  | -1.36524 | down      | PREDICTED: 3-ketoacyl-CoA synthase 4 [Sesamum indicum]                                    |
| c46670.graph_c1 | 48.443091     | 45.170257     | 45.6225207    | 47.9590596     | 46.6502474     | 50.1537622     | 1.089E-33 | -1.03347 | down      | PREDICTED: UDP-galactose transporter 1 [Sesamum indicum]                                  |

| #ID             | 0 h-1<br>FPKM | 0 h-2<br>FPKM | 0 h-3<br>FPKM | 28 h-1<br>FPKM | 28 h-2<br>FPKM | 28 h-3<br>FPKM | FDR       | log2FC   | regulated | nr_annotation                                                                            |
|-----------------|---------------|---------------|---------------|----------------|----------------|----------------|-----------|----------|-----------|------------------------------------------------------------------------------------------|
| c46679.graph_c0 | 0             | 0             | 0             | 5.21987107     | 5.23672685     | 5.20589932     | 2.759E-20 | Inf      | up        | RecName: Full=Tubulin beta-1 chain; AltName: Full=Beta-1-tubulin [Cyanophora paradoxa]   |
| c46684.graph_c0 | 0.18360544    | 0.22054716    | 0             | 2.96244299     | 4.21704006     | 3.57154958     | 1.138E-15 | 3.66173  | up        | hypothetical protein MIMGU_mgv1a00264/mg [Erythranthe                                    |
| c46687.graph_c0 | 112.375138    | 124.833601    | 107.757127    | 23.4962482     | 22.8132927     | 25.1084189     | 7.71E-144 | -3.36137 | down      | PREDICTED: uncharacterized protein LOC105168969 [Sesamum indicum]                        |
| c46690.graph_c0 | 4.89292819    | 5.03238342    | 4.31841102    | 40.4072657     | 41.7413339     | 37.1811902     | 8.683E-79 | 1.97721  | up        | tyrosine aminotransferase 2 [Salvia miltiorrhiza]                                        |
| c46691.graph_c0 | 20.2031272    | 23.0500745    | 19.7270852    | 13.1270086     | 12.3499378     | 12.5099002     | 2.844E-47 | -1.81928 | down      | PREDICTED: fimbrin-1 [Sesamum indicum]                                                   |
| c46692.graph_c0 | 38.2432148    | 41.4168223    | 37.1535737    | 26.7124416     | 25.4986918     | 28.1232393     | 6.478E-87 | -1.62965 | down      | PREDICTED: E3 ubiquitin-protein ligase MBR2-like isoform X2 [Sesamum indicum]            |
| c46692.graph_c1 | 36.5070894    | 39.8571062    | 36.8923939    | 38.7934432     | 34.9432956     | 36.6572857     | 2.256E-40 | -1.12729 | down      | PREDICTED: transcription factor SPA1 ULA-like [Sesamum                                   |
| c46698.graph_c0 | 20.651992     | 23.8739517    | 19.7820739    | 623.121249     | 651.439834     | 662.572372     | 0         | 3.82337  | up        | hypothetical protein MIMGU_mgv1a00600/mg [Erythranthe                                    |
| c46699.graph_c0 | 0.03100056    | 0.0310316     | 0             | 3.46977793     | 3.62112584     | 5.05591153     | 3.603E-19 | 6.54478  | up        | PREDICTED: gamma-cadinene synthase-like [Sesamum indicum]                                |
| c46710.graph_c0 | 5.29739268    | 5.23557447    | 4.8254699     | 108.933872     | 87.3825495     | 89.3902249     | 2.874E-46 | 3.12784  | up        | PREDICTED: uncharacterized protein LOC105177873 [Sesamum indicum]                        |
| c46712.graph_c0 | 2.11783371    | 3.34300502    | 2.61682709    | 20.8979983     | 18.762027      | 16.9076731     | 1.901E-13 | 1.71564  | up        | PREDICTED: sucrose transport protein SUC3 isoform X2 [Nicotiana tomentosiformis]         |
| c46713.graph_c0 | 2.71437042    | 2.71708845    | 3.1821021     | 14.6401694     | 11.4062071     | 12.5958188     | 2.771E-08 | 1.07284  | up        | PREDICTED: probable plastid-lipid-associated protein 10, chloroplastic [Sesamum indicum] |
| c46714.graph_c0 | 0.45386591    | 0.63100054    | 0.61563764    | 2.14413632     | 3.06112395     | 2.63187351     | 0.0002684 | 1.11065  | up        | PREDICTED: boron transporter 4-like [Sesamum indicum]                                    |
| c46718.graph_c0 | 0.18582979    | 0.14881269    | 0.04775973    | 4.32192056     | 3.99984627     | 4.5405643      | 1.715E-19 | 3.99557  | up        | PREDICTED: probable receptor-like protein kinase At1g80640 isoform X1 [Sesamum indicum]  |
| c46718.graph_c1 | 0.44147464    | 0.47137783    | 0.60513322    | 2.41715457     | 2.83913451     | 2.86256686     | 5.194E-05 | 1.32469  | up        | PREDICTED: uncharacterized protein LOC105166978 [Sesamum indicum]                        |
| c46719.graph_c2 | 4.02228851    | 4.22541978    | 4.31679999    | 25.4911972     | 24.7130046     | 24.7588846     | 5.431E-43 | 1.48544  | up        | PREDICTED: 1,4-alpha-glucan-branching enzyme-like isoform X1 [Sesamum indicum]           |
| c46725.graph_c0 | 1.28400595    | 1.28529169    | 1.59677273    | 0.93320813     | 0.84259944     | 1.03169641     | 4.42E-06  | -1.66213 | down      | PREDICTED: GDSL esterase/lipase At1g53811 [Sesamum                                       |
| c46728.graph_c0 | 2.05177401    | 2.02966586    | 2.66762978    | 12.5262272     | 12.1020261     | 13.0271459     | 1.512E-21 | 1.38616  | up        | hypothetical protein MIMGU_mgv1a007859/mg [Erythranthe                                   |
| c46730.graph_c0 | 17.9809927    | 14.5244439    | 16.493377     | 16.1925971     | 17.8252304     | 17.8327991     | 1.477E-12 | -1.0082  | down      | PREDICTED: protein-lysine N-methyltransferase EFM1 isoform X1 [Sesamum indicum]          |
| c46732.graph_c0 | 2.16230317    | 1.39487963    | 2.03767313    | 8.38159722     | 9.1444207      | 8.26417216     | 3.283E-06 | 1.11342  | up        | hypothetical protein MIMGU_mgv1a009658/mg [Erythranthe                                   |
| c46734.graph_c0 | 49.2876437    | 48.4121098    | 49.0515233    | 44.7407449     | 45.266281      | 47.5529761     | 9.354E-47 | -1.18359 | down      | PREDICTED: protein RCC2 homolog isoform X1 [Sesamum indicum]                             |
| c46737.graph_c0 | 0             | 0             | 0             | 3.48596601     | 4.75336805     | 5.68903959     | 3.584E-13 | Inf      | up        | 60S ribosomal protein L12 [Triticum urartu]                                              |
| c46738.graph_c0 | 1.45296223    | 1.89074229    | 2.98738238    | 40.1281738     | 33.9436431     | 39.4654527     | 9.365E-32 | 3.06538  | up        | cell wall-associated hydrolase [Phaseolus vulgaris]                                      |
| c46740.graph_c0 | 267.531722    | 273.896711    | 257.507924    | 8005.65746     | 7682.10383     | 7556.60064     | 8.6E-201  | 3.77254  | up        | hypothetical protein MIMGU_mgv1a004755/mg [Erythranthe                                   |

| #ID             | 0 h-1<br>FPKM | 0 h-2<br>FPKM | 0 h-3<br>FPKM | 28 h-1<br>FPKM | 28 h-2<br>FPKM | 28 h-3<br>FPKM | FDR       | log2FC   | regulated | nr_annotation                                                                            |
|-----------------|---------------|---------------|---------------|----------------|----------------|----------------|-----------|----------|-----------|------------------------------------------------------------------------------------------|
| c46745.graph_c0 | 6.56906508    | 7.54414856    | 6.34749104    | 58.6987039     | 68.1373454     | 55.3873354     | 4.509E-34 | 2.06431  | up        | PREDICTED: uncharacterized protein LOC105166530 [Sesamum indicum]                        |
| c46745.graph_c2 | 3.83353249    | 3.98785634    | 4.53986918    | 20.5959485     | 22.3943754     | 22.7350773     | 7.999E-12 | 1.31809  | up        | PREDICTED: BTB/POZ domain-containing protein At5g48800-like isoform X2 [Sesamum indicum] |
| c46746.graph_c0 | 0.87470229    | 0.78243156    | 0.90878785    | 6.87127916     | 6.57050592     | 6.22499199     | 6.204E-22 | 1.84649  | up        | PREDICTED: putative leucine--tRNA ligase, mitochondrial isoform X3 [Sesamum indicum]     |
| c46749.graph_c1 | 0.10474247    | 0             | 0.04486607    | 15.9865068     | 17.8710588     | 15.3225328     | 3.18E-100 | 7.27952  | up        | PREDICTED: BTB/POZ domain-containing protein NPY1 [Sesamum indicum]                      |
| c46751.graph_c1 | 2.20664946    | 2.04879684    | 1.19178733    | 11.8307837     | 13.7251196     | 13.9401961     | 2.148E-18 | 1.7751   | up        | transposase [Pisum sativum]                                                              |
| c46753.graph_c0 | 1.32854418    | 1.14431063    | 0.43673374    | 9.31895293     | 10.3808194     | 10.0228714     | 4.706E-25 | 2.27391  | up        | PREDICTED: uncharacterized protein LOC105158178 [Sesamum indicum]                        |
| c46756.graph_c1 | 100.530254    | 95.6048031    | 97.4615591    | 19.8458754     | 17.9393041     | 22.9860242     | 0         | -3.3616  | down      | PREDICTED: uncharacterized protein LOC105173509 [Sesamum indicum]                        |
| c46756.graph_c2 | 144.928747    | 140.16661     | 140.734433    | 140.513688     | 148.203202     | 142.066427     | 2.677E-40 | -1.07369 | down      | PREDICTED: trineix transcription factor ASILZ [Sesamum indicum]                          |
| c46761.graph_c1 | 41.007158     | 37.9467994    | 39.0534589    | 26.7571589     | 26.4615063     | 25.2383713     | 2.561E-74 | -1.67926 | down      | PREDICTED: uncharacterized protein LOC105178437 [Sesamum indicum]                        |
| c46762.graph_c0 | 1.07059126    | 0.98477167    | 0.96674476    | 0.02102972     | 0.01898786     | 0.06864031     | 2.465E-30 | -5.88062 | down      | PREDICTED: phospholipase D beta 1-like [Sesamum indicum]                                 |
| c46762.graph_c2 | 4.18122222    | 3.10530351    | 3.23537657    | 0.22873352     | 0.23602848     | 0.10665411     | 1.981E-49 | -5.29376 | down      | hypothetical protein JCGZ_20700 [Jatropha curcas]                                        |
| c46767.graph_c0 | 15.7976799    | 15.0567473    | 14.8737392    | 13.0921269     | 13.138205      | 12.4146225     | 7.861E-41 | -1.33295 | down      | PREDICTED: MYST-like histone acetyltransferase 2 isoform X2 [Sesamum indicum]            |
| c46769.graph_c0 | 1.39768571    | 1.25917675    | 1.05199057    | 1.42216188     | 1.08753616     | 1.07758159     | 1.093E-05 | -1.13567 | down      | PREDICTED: endoglucanase 11-like [Sesamum indicum]                                       |
| c46770.graph_c0 | 29.2311509    | 27.517102     | 27.1630984    | 10.9948004     | 11.2494165     | 11.6044366     | 1.09E-134 | -2.39932 | down      | PREDICTED: diphtamide biosynthesis protein 2 [Sesamum indicum]                           |
| c46771.graph_c0 | 5.29875796    | 5.3757404     | 4.69276759    | 0.28623091     | 0.79881353     | 0.33972667     | 1.404E-75 | -4.52301 | down      | PREDICTED: LOW QUALITY PROTEIN: uncharacterized protein LOC105163603 [Sesamum indicum]   |
| c46775.graph_c0 | 12.6482602    | 13.7921422    | 11.7851948    | 87.2199199     | 88.6773393     | 91.71514       | 1.082E-75 | 1.71834  | up        | PREDICTED: gamma-tubulin complex component 5 [Sesamum indicum]                           |
| c46778.graph_c0 | 0.22975133    | 0.17248604    | 0.07380989    | 2.4629836      | 1.95999746     | 2.00977451     | 3.635E-07 | 2.67762  | up        | PREDICTED: probable ubiquitin-like-specific protease 2B isoform X1 [Sesamum indicum]     |
| c46780.graph_c0 | 3.6595009     | 2.97073774    | 3.09683648    | 14.4499781     | 14.3648517     | 13.7231577     | 1.116E-15 | 1.0396   | up        | PREDICTED: subtilisin-like protease SBT3.5 [Sesamum indicum]                             |
| c46787.graph_c1 | 0.10627276    | 0.21275836    | 0.13656471    | 6.4107899      | 6.76468909     | 6.61772267     | 5.285E-14 | 4.34993  | up        | hypothetical protein MIMGU_mgv1a019568mg [Erythranthe outafata]                          |
| c46792.graph_c1 | 24.4781464    | 26.6396106    | 22.8953966    | 17.8139076     | 18.2752065     | 19.9239388     | 2.047E-49 | -1.49099 | down      | PREDICTED: LOW QUALITY PROTEIN: protein ALWAYS EARLY 3-like [Sesamum indicum]            |
| c46797.graph_c0 | 0             | 0             | 0             | 0.57613714     | 0.55375897     | 0.87958534     | 2.958E-09 | Inf      | up        | hypothetical protein GUITHDRAFT_89280 [Guillardia theta CCMP2712]                        |
| c46802.graph_c0 | 0.11272624    | 0.1253768     | 0.0482859     | 4.06002639     | 4.21651857     | 3.95176802     | 1.388E-52 | 4.33476  | up        | PREDICTED: callose synthase 7 [Sesamum indicum]                                          |
| c46804.graph_c0 | 1.04418354    | 1.47773774    | 0.97166073    | 0.94209093     | 1.20504468     | 1.13175391     | 0.0005373 | -1.18008 | down      | hypothetical protein MIMGU_mgv1a01387/mg [Erythranthe outafata]                          |

| #ID             | 0 h-1<br>FPKM | 0 h-2<br>FPKM | 0 h-3<br>FPKM | 28 h-1<br>FPKM | 28 h-2<br>FPKM | 28 h-3<br>FPKM | FDR       | log2FC   | regulated | nr_annotation                                                                                 |
|-----------------|---------------|---------------|---------------|----------------|----------------|----------------|-----------|----------|-----------|-----------------------------------------------------------------------------------------------|
| c46806.graph_c1 | 3.35063814    | 3.30092378    | 3.35190777    | 15.9599681     | 15.8506944     | 15.8592562     | 5.084E-34 | 1.16197  | up        | PREDICTED: uncharacterized protein LOC105173395 isoform X2 [Sesamum indicum]                  |
| c46807.graph_c1 | 63.8047329    | 61.1200834    | 62.5552312    | 20.8356775     | 23.424209      | 21.3073789     | 1.4E-188  | -2.60639 | down      | hypothetical protein MIMGU_mgv1a012584mg [Erythranthe diffusa]                                |
| c46809.graph_c1 | 515.97447     | 510.28739     | 517.220676    | 332.313963     | 316.518424     | 320.95601      | 9.988E-83 | -1.76107 | down      | PREDICTED: pentatricopeptide repeat-containing protein At5g14080-like [Sesamum indicum]       |
| c46812.graph_c0 | 0.58256445    | 0.74976145    | 0.6416729     | 3.65942445     | 3.00374289     | 3.23284233     | 0.0004933 | 1.23476  | up        | PREDICTED: LOW QUALITY PROTEIN: phosphatidylinositol 4-phosphate 5-kinase 4 [Sesamum indicum] |
| c46816.graph_c0 | 3.3554227     | 5.27808701    | 11.0876169    | 41.1095459     | 36.4889458     | 34.9664543     | 0.0001026 | 1.4072   | up        | cell wall-associated hydrolase [Phaseolus vulgaris]                                           |
| c46818.graph_c0 | 11.6693665    | 12.8491568    | 10.6079971    | 9.64347072     | 9.5863735      | 8.48415896     | 7.57E-27  | -1.43157 | down      | PREDICTED: geranylgeranyl transferase type-1 subunit beta [Sesamum indicum]                   |
| c46820.graph_c0 | 1.19184463    | 0.9941984     | 1.27630628    | 5.72671504     | 4.21476147     | 5.65466546     | 0.0016261 | 1.08023  | up        | putative retrotransposon protein [Phyllostachys edulis]                                       |
| c46821.graph_c0 | 7.15802122    | 7.05567727    | 6.90879735    | 41.414807      | 39.4859292     | 40.9960232     | 4.702E-62 | 1.4388   | up        | PREDICTED: nodal modulator 1 [Sesamum indicum]                                                |
| c46822.graph_c0 | 5.57503254    | 5.70744725    | 7.13157328    | 7.20133407     | 6.01987434     | 6.05657444     | 2.348E-05 | -1.02799 | down      | PREDICTED: uncharacterized protein LOC105160395 [Sesamum indicum]                             |
| c46832.graph_c0 | 1.56198078    | 1.53911448    | 1.16041663    | 7.21940817     | 5.20514945     | 6.45546987     | 1.989E-05 | 1.06109  | up        | PREDICTED: cytochrome c-type biogenesis ccda-like chloroplastic protein [Sesamum indicum]     |
| c46833.graph_c0 | 61.0235244    | 57.9088477    | 62.939766     | 47.7490763     | 50.2615801     | 49.5111338     | 2.1E-54   | -1.39312 | down      | PREDICTED: F-box protein SKIP17-like [Sesamum indicum]                                        |
| c46836.graph_c0 | 2.22752375    | 2.90837515    | 2.57206211    | 52.1583916     | 48.9584126     | 47.1174908     | 6.77E-157 | 3.17355  | up        | PREDICTED: probable pectate lyase 12 [Sesamum indicum]                                        |
| c46837.graph_c0 | 4.60673214    | 4.98025269    | 4.69943681    | 4.83163276     | 4.62295982     | 5.00177156     | 2.936E-19 | -1.07321 | down      | PREDICTED: protein ROOT PRIMORDIUM DEFECTIVE 1-like [Sesamum indicum]                         |
| c46838.graph_c0 | 69.644263     | 73.0703166    | 71.0439443    | 33.4656638     | 32.1815116     | 31.8008054     | 9.29E-161 | -2.22406 | down      | PREDICTED: regulator of nonsense transcripts UPF3-like [Sesamum indicum]                      |
| c46841.graph_c0 | 241.047589    | 221.643557    | 249.413677    | 194.618883     | 198.162002     | 211.290987     | 3.997E-31 | -1.32829 | down      | PREDICTED: uncharacterized protein LOC104591752 [Nelumbo nucifera]                            |
| c46842.graph_c0 | 12.5275414    | 13.1638074    | 11.1255866    | 13.1092138     | 12.2452845     | 12.7586173     | 2.245E-20 | -1.03886 | down      | PREDICTED: uncharacterized protein LOC105174093 isoform X2 [Sesamum indicum]                  |
| c46843.graph_c1 | 4.82520577    | 5.5687491     | 4.44982832    | 5.21913959     | 4.71239371     | 4.91526634     | 8.746E-12 | -1.08875 | down      | hypothetical protein F383_09329 [Gossypium arboreum]                                          |
| c46844.graph_c1 | 22.3812256    | 23.4670243    | 23.1140959    | 14.669722      | 13.2295397     | 13.7458832     | 8.399E-89 | -1.81847 | down      | PREDICTED: uncharacterized protein LOC105173956 [Sesamum indicum]                             |
| c46846.graph_c0 | 7.16144652    | 6.56564979    | 6.23550297    | 37.3585206     | 34.0826085     | 32.8062901     | 8.516E-32 | 1.29537  | up        | nucleotide binding protein, putative [Ricinus communis]                                       |
| c46849.graph_c0 | 3.4500809     | 3.13766347    | 3.67655314    | 14.8462283     | 13.8465154     | 15.1086918     | 1.989E-16 | 1.00195  | up        | PREDICTED: patellin-3 [Sesamum indicum]                                                       |
| c46852.graph_c0 | 476.026893    | 447.305302    | 455.919056    | 418.53408      | 438.0514       | 433.157238     | 3.05E-42  | -1.18694 | down      | PREDICTED: uncharacterized protein LOC105178178 [Sesamum indicum]                             |
| c46855.graph_c0 | 2.49235888    | 3.11856826    | 2.0017374     | 15.2839581     | 16.9688657     | 17.8297475     | 9.122E-07 | 1.63101  | up        | -                                                                                             |

| #ID             | 0 h-1<br>FPKM | 0 h-2<br>FPKM | 0 h-3<br>FPKM | 28 h-1<br>FPKM | 28 h-2<br>FPKM | 28 h-3<br>FPKM | FDR       | log2FC   | regulated | nr_annotation                                                                                                             |
|-----------------|---------------|---------------|---------------|----------------|----------------|----------------|-----------|----------|-----------|---------------------------------------------------------------------------------------------------------------------------|
| c46855.graph_c1 | 0.50419743    | 0.6234558     | 0.26678798    | 2.65135753     | 3.48384536     | 2.97259471     | 2.525E-06 | 1.62408  | up        | PREDICTED: peptide-N4-(N-acetyl-beta-glucosaminyl)asparagine amidase A-like [Sesamum indicum]                             |
| c46858.graph_c0 | 0             | 0             | 0             | 1.35757144     | 1.51417378     | 2.74986919     | 1E-08     | Inf      | up        | predicted protein [Hordeum vulgare subsp. vulgare]                                                                        |
| c46860.graph_c1 | 11.3484286    | 9.76082998    | 9.92636627    | 50.1636143     | 48.4220933     | 46.1080615     | 1.062E-36 | 1.13156  | up        | hypothetical protein CISIN_1g014750mg [Citrus sinensis]                                                                   |
| c46861.graph_c0 | 6.85524604    | 5.64972351    | 5.35403944    | 4.61263805     | 4.92779276     | 4.53963547     | 3.219E-19 | -1.43106 | down      | PREDICTED: pentatricopeptide repeat-containing protein At3g54980, mitochondrial-like [Sesamum indicum]                    |
| c46863.graph_c0 | 2.52902963    | 3.68674088    | 2.90282616    | 16.1323115     | 15.0010101     | 14.6200108     | 1.702E-19 | 1.23569  | up        | PREDICTED: myosin-2 heavy chain [Sesamum indicum]                                                                         |
| c46875.graph_c0 | 39.2994449    | 39.2313143    | 34.1229017    | 36.0700502     | 34.1110072     | 34.5272613     | 1.173E-50 | -1.19425 | down      | PREDICTED: uncharacterized protein LOC105163168 [Sesamum indicum]                                                         |
| c46878.graph_c0 | 3.52640345    | 2.99599492    | 2.43714584    | 14.064027      | 13.7291569     | 13.8135362     | 2.659E-13 | 1.12913  | up        | PREDICTED: LOW QUALITY PROTEIN: ATP-dependent Clp protease ATP-binding subunit clpX-like, mitochondrial [Sesamum indicum] |
| c46883.graph_c1 | 6.73632821    | 7.01830112    | 5.21153529    | 31.773551      | 30.5379558     | 27.965241      | 4.15E-13  | 1.16327  | up        | PREDICTED: probable serine/threonine-protein kinase WNK5 isoform X1 [Sesamum indicum]                                     |
| c46888.graph_c1 | 6.11006754    | 4.64954945    | 4.80715023    | 31.0400192     | 30.7879356     | 31.299989      | 8.762E-39 | 1.4928   | up        | PREDICTED: probable sphingolipid transporter spinster homolog 2 [Sesamum indicum]                                         |
| c46891.graph_c0 | 125.717258    | 134.820094    | 117.264677    | 89.805086      | 111.964959     | 88.9778563     | 1.741E-42 | -1.4681  | down      | PREDICTED: primary amine oxidase-like [Sesamum indicum]                                                                   |
| c46896.graph_c0 | 0.22856138    | 0.4575805     | 0             | 3.48845901     | 1.79985795     | 1.94288611     | 0.008731  | 2.32277  | up        | -                                                                                                                         |
| c46899.graph_c0 | 19.4485729    | 20.029369     | 16.8368412    | 12.6213277     | 12.5816073     | 13.0385873     | 1.836E-53 | -1.6468  | down      | PREDICTED: nuclear-pore anchor [Sesamum indicum]                                                                          |
| c46900.graph_c2 | 87.7322834    | 89.5017231    | 85.6229526    | 58.5306892     | 57.4710568     | 61.1900463     | 2.668E-89 | -1.65886 | down      | PREDICTED: 1,4-alpha-glucan-branching enzyme 3, chloroplastic/amyloplastic [Sesamum indicum]                              |
| c46907.graph_c0 | 6.59517583    | 5.79668479    | 4.7543031     | 3.97496138     | 4.96128881     | 5.15149839     | 4.256E-05 | -1.36958 | down      | -                                                                                                                         |
| c46910.graph_c0 | 1.78511556    | 1.1562314     | 1.07950314    | 20.5868709     | 21.5855253     | 19.1651738     | 6.159E-79 | 2.84583  | up        | PREDICTED: cytosolic endo-beta-N-acetylglucosaminidase [Sesamum indicum]                                                  |
| c46912.graph_c0 | 48.2427553    | 44.1536762    | 49.1718293    | 39.1696164     | 38.8628787     | 39.7754673     | 7.8E-40   | -1.35603 | down      | PREDICTED: uncharacterized protein LOC105158577 [Sesamum indicum]                                                         |
| c46913.graph_c2 | 220.391984    | 217.392697    | 199.780805    | 129.765228     | 125.958113     | 130.547746     | 2.1E-102  | -1.81212 | down      | PREDICTED: serine/threonine-protein kinase HT1-like [Sesamum indicum]                                                     |
| c46915.graph_c1 | 158.037291    | 149.981082    | 155.610949    | 81.0704103     | 70.8490924     | 83.9917481     | 4.97E-135 | -2.06461 | down      | PREDICTED: uncharacterized protein At1g04910-like [Sesamum indicum]                                                       |
| c46925.graph_c0 | 148.998171    | 142.405006    | 153.303666    | 693.303834     | 625.309925     | 653.53746      | 1.623E-36 | 1.05783  | up        | PREDICTED: aquaporin PIP2-7 [Sesamum indicum]                                                                             |
| c46926.graph_c0 | 1.4750977     | 1.52271775    | 1.48090543    | 1.13909829     | 1.45199852     | 1.94100406     | 0.002348  | -1.07155 | down      | PREDICTED: kinesin-4-like isoform X2 [Sesamum indicum]                                                                    |
| c46929.graph_c1 | 0.12891214    | 0.30109621    | 0.27609535    | 3.49785721     | 3.04544292     | 2.98164359     | 6.739E-10 | 2.6567   | up        | -                                                                                                                         |
| c46933.graph_c1 | 0.16645887    | 0.45822027    | 0.40107419    | 4.58216848     | 4.83364044     | 3.96113159     | 9.169E-22 | 2.60693  | up        | PREDICTED: probable LRR receptor-like serine/threonine-protein kinase At1g07650 [Sesamum indicum]                         |

| #ID             | 0 h-1<br>FPKM | 0 h-2<br>FPKM | 0 h-3<br>FPKM | 28 h-1<br>FPKM | 28 h-2<br>FPKM | 28 h-3<br>FPKM | FDR       | log2FC   | regulated | nr_annotation                                                                                                 |
|-----------------|---------------|---------------|---------------|----------------|----------------|----------------|-----------|----------|-----------|---------------------------------------------------------------------------------------------------------------|
| c46938.graph_c0 | 22.2719481    | 21.0287552    | 23.0898356    | 22.599414      | 23.1940914     | 22.764029      | 2.265E-30 | -1.04492 | down      | PREDICTED: EH domain-containing protein 1-like [Sesamum indicum]                                              |
| c46941.graph_c0 | 19.2166944    | 19.9168552    | 18.0508142    | 398.949875     | 369.186769     | 358.6808       | 1.36E-251 | 3.21061  | up        | Expansin A1, ALPHA 1.2,EXPA1 [Theobroma cacao]                                                                |
| c46945.graph_c0 | 1.96555781    | 2.17739546    | 1.48181417    | 17.8664748     | 17.54199       | 14.6566102     | 5.514E-30 | 2.06632  | up        | PREDICTED: mitogen-activated protein kinase 9-like [Sesamum indicum]                                          |
| c46945.graph_c1 | 2.59052261    | 2.24736774    | 2.21928274    | 19.3298428     | 15.8663961     | 14.8511956     | 6.961E-07 | 1.73666  | up        | PREDICTED: mitogen-activated protein kinase 9-like [Sesamum indicum]                                          |
| c46948.graph_c1 | 0.06146046    | 0.15380501    | 0.11846869    | 3.03749935     | 3.12573128     | 3.04354389     | 1.076E-16 | 3.69088  | up        | PREDICTED: long-chain-alcohol oxidase FAO4A-like isoform X1 [Sesamum indicum]                                 |
| c46955.graph_c0 | 8.5615848     | 10.1155962    | 7.99597121    | 8.38168762     | 9.51741257     | 8.39316457     | 2.798E-12 | -1.11035 | down      | PREDICTED: probable LRR receptor-like serine/threonine-protein kinase At2g16250 [Sesamum indicum]             |
| c46956.graph_c0 | 0.73203614    | 0.51724882    | 0.40117893    | 4.03724206     | 3.94902197     | 4.42439746     | 1.976E-22 | 1.82752  | up        | PREDICTED: uncharacterized protein LOC105155208 [Sesamum indicum]                                             |
| c46957.graph_c0 | 4.26585206    | 2.92474224    | 3.90483585    | 0.16988475     | 0.5752125      | 0.34656142     | 5.219E-27 | -4.43704 | down      | BR11 kinase inhibitor 1 [Glycine soja]                                                                        |
| c46957.graph_c2 | 16.1265408    | 15.694281     | 10.2177103    | 6.34869998     | 7.27558721     | 7.77073101     | 2.903E-09 | -2.05889 | down      | PREDICTED: CBL-interacting serine/threonine-protein kinase 6-like [Sesamum indicum]                           |
| c46957.graph_c6 | 3.64265611    | 3.87940072    | 3.82598795    | 30.9474948     | 30.9770872     | 28.4095159     | 1.283E-84 | 1.9014   | up        | PREDICTED: alpha-glucan phosphorylase, H isozyme [Sesamum indicum]                                            |
| c46959.graph_c0 | 54.6267508    | 55.5915447    | 55.4959728    | 268.720873     | 261.970526     | 266.094437     | 3.261E-47 | 1.17482  | up        | PREDICTED: 60S ribosomal protein L27/a-5-like [Sesamum indicum]                                               |
| c46964.graph_c0 | 5.20673258    | 4.92830299    | 4.18747544    | 23.73506       | 23.8013737     | 25.7324604     | 1.568E-22 | 1.26744  | up        | hypothetical protein MIMGU_mgv1a0005 //mg [Erythranae outfatal]                                               |
| c46965.graph_c0 | 0.38176897    | 0.70970946    | 0.49058824    | 6.14392286     | 4.68843616     | 5.82200231     | 3.486E-10 | 2.30513  | up        | -                                                                                                             |
| c46971.graph_c1 | 45.4522506    | 51.2434819    | 48.1615199    | 28.2585985     | 27.5090127     | 27.2484915     | 3.921E-64 | -1.8942  | down      | PREDICTED: uncharacterized protein LOC105159071 [Sesamum indicum]                                             |
| c46972.graph_c0 | 127.101446    | 120.24303     | 134.709411    | 104.463256     | 119.06992      | 115.797656     | 1.231E-26 | -1.26254 | down      | unnamed protein product [Coffea canephora]                                                                    |
| c46976.graph_c0 | 23.5194074    | 26.5507881    | 22.4805265    | 20.5468256     | 20.8747106     | 19.6583474     | 4.292E-32 | -1.33816 | down      | PREDICTED: serine/threonine-protein kinase EDK1 [Sesamum indicum]                                             |
| c46979.graph_c0 | 3.98613871    | 4.69427085    | 4.59504573    | 3.64978127     | 4.14170242     | 3.56919473     | 4.547E-18 | -1.31716 | down      | PREDICTED: probable boron transporter 2 [Sesamum indicum]                                                     |
| c46980.graph_c0 | 5.36422422    | 5.7826415     | 6.18624148    | 27.2908107     | 24.6410433     | 25.7766625     | 3.891E-06 | 1.07236  | up        | -                                                                                                             |
| c46981.graph_c0 | 5.13779598    | 4.68579042    | 3.81464561    | 109.893784     | 122.400141     | 109.083024     | 5.48E-183 | 3.5583   | up        | PREDICTED: heterodimeric geranylgeranyl pyrophosphate synthase small subunit, chloroplastic [Sesamum indicum] |
| c46981.graph_c1 | 0.68697652    | 0.9578183     | 0.4729243     | 9.59351178     | 8.45273582     | 9.09413019     | 1.602E-34 | 2.59466  | up        | PREDICTED: putative membrane-bound O-acyltransferase C24H6.01c [Sesamum indicum]                              |
| c46982.graph_c0 | 0.22131996    | 0.16615619    | 0.28440492    | 2.01067593     | 2.50532355     | 2.26415929     | 2.291E-06 | 2.23981  | up        | PREDICTED: LOW QUALITY PROTEIN: ABC transporter B family member 13-like [Sesamum indicum]                     |
| c46982.graph_c1 | 0.16741026    | 0.12568342    | 0.18823771    | 1.59695566     | 1.78521104     | 1.87398589     | 2.291E-09 | 2.35626  | up        | PREDICTED: LOW QUALITY PROTEIN: ABC transporter B family member 13-like [Sesamum indicum]                     |
| c46985.graph_c0 | 3.9280582     | 3.84194595    | 3.9688104     | 3.57406084     | 3.42381269     | 3.27206354     | 1.681E-11 | -1.28389 | down      | PREDICTED: sucrose nonfermenting 4-like protein [Sesamum indicum]                                             |

| #ID             | 0 h-1<br>FPKM | 0 h-2<br>FPKM | 0 h-3<br>FPKM | 28 h-1<br>FPKM | 28 h-2<br>FPKM | 28 h-3<br>FPKM | FDR       | log2FC   | regulated | nr_annotation                                                                                     |
|-----------------|---------------|---------------|---------------|----------------|----------------|----------------|-----------|----------|-----------|---------------------------------------------------------------------------------------------------|
| c46992.graph_c0 | 6.99707137    | 7.04527834    | 6.82297219    | 4.45723083     | 5.18588332     | 4.34494889     | 1.247E-21 | -1.66774 | down      | PREDICTED: pentatricopeptide repeat-containing protein At4g16835, mitochondrial [Sesamum indicum] |
| c47001.graph_c0 | 2.41325432    | 3.07210312    | 3.10112734    | 1.62048742     | 1.25658611     | 1.29119146     | 2.466E-16 | -2.13598 | down      | PREDICTED: ATP-dependent zinc metalloprotease FTSH 10, mitochondrial-like [Sesamum indicum]       |
| c47003.graph_c0 | 0.19581067    | 0.50090613    | 0.25162447    | 3.33647426     | 3.02680079     | 2.5806026      | 1.723E-11 | 2.14648  | up        | PREDICTED: transcription factor HBP-1B(c58)-like [Sesamum indicum]                                |
| c47004.graph_c1 | 42.0591468    | 41.5198265    | 42.2067169    | 464.531392     | 473.260237     | 350.869053     | 7.625E-21 | 2.26486  | up        | PREDICTED: glucan endo-1,5-beta-glucosidase 5 [Sesamum indicum]                                   |
| c47005.graph_c0 | 0.36377804    | 0.23172692    | 0.29748039    | 8.07596713     | 9.11480141     | 6.6095361      | 7.456E-27 | 3.646    | up        | PREDICTED: (6-4)DNA photolyase [Sesamum indicum]                                                  |
| c47005.graph_c1 | 4.93305483    | 4.47793294    | 4.21298927    | 52.8221685     | 52.2175085     | 52.9331621     | 2.19E-119 | 2.44678  | up        | PREDICTED: 3-oxoacyl-[acyl-carrier-protein] reductase 4-like [Sesamum indicum]                    |
| c47006.graph_c0 | 0.18585978    | 0.08586733    | 0.16534881    | 3.19000902     | 3.17112157     | 3.22198078     | 9.349E-30 | 3.36392  | up        | PREDICTED: putative ATP-dependent helicase hrq1 isoform X1 [Sesamum indicum]                      |
| c47007.graph_c1 | 38.7305071    | 40.2961273    | 37.347542     | 37.5421331     | 36.1965053     | 36.7095468     | 7.064E-47 | -1.16534 | down      | PREDICTED: uncharacterized protein LOC105162827 [Sesamum indicum]                                 |
| c47008.graph_c0 | 2.69800569    | 2.99006883    | 2.16690258    | 0              | 0.0632323      | 0.14286378     | 3.099E-43 | -6.33279 | down      | PREDICTED: pyruvate decarboxylase 1-like [Sesamum indicum]                                        |
| c47018.graph_c0 | 66.0199894    | 64.3955238    | 65.0755799    | 26.4278174     | 24.197687      | 25.1615597     | 2.48E-192 | -2.45746 | down      | PREDICTED: 65-kDa microtubule-associated protein 6-like [Sesamum indicum]                         |
| c47021.graph_c0 | 7.36544331    | 8.18995728    | 6.79469165    | 50.6730021     | 54.5797136     | 51.7684664     | 2.04E-86  | 1.72326  | up        | PREDICTED: uncharacterized protein LOC105163284 [Sesamum indicum]                                 |
| c47022.graph_c0 | 1.89150628    | 1.24792295    | 1.10484566    | 8.1859272      | 8.51954075     | 8.71923746     | 1.795E-09 | 1.49838  | up        | PREDICTED: dihydroorotase, mitochondrial isoform X3 [Vitis vinifera]                              |
| c47023.graph_c0 | 113.86264     | 113.315573    | 111.71551     | 67.0022978     | 64.6730611     | 64.5540497     | 1.24E-116 | -1.87866 | down      | unnamed protein product [Coffea canephora]                                                        |
| c47028.graph_c0 | 2.05268382    | 2.44186406    | 1.72029129    | 1.40539304     | 1.60081428     | 1.0762176      | 6.901E-11 | -1.69577 | down      | PREDICTED: probable LRR receptor-like serine/threonine-protein kinase At4g36180 [Sesamum indicum] |
| c47029.graph_c0 | 0.07593404    | 0             | 0.19515649    | 1.54527578     | 1.94336881     | 2.34173163     | 1.511E-09 | 3.31748  | up        | PREDICTED: uncharacterized protein LOC105170663 [Sesamum indicum]                                 |
| c47030.graph_c0 | 0             | 0.16196886    | 0.1039641     | 2.58720607     | 2.60145957     | 2.63892379     | 4.116E-10 | 3.77869  | up        | PREDICTED: uncharacterized protein LOC105173611 isoform X1 [Sesamum indicum]                      |
| c47033.graph_c0 | 27.1938824    | 27.5824552    | 24.7994467    | 12.9901203     | 12.2572972     | 13.4158413     | 3.2E-150  | -2.13032 | down      | PREDICTED: protein CHROMATIN REMODELING 5 isoform X2 [Sesamum indicum]                            |
| c47033.graph_c3 | 2.85110597    | 1.70444889    | 1.22126135    | 42.07651       | 39.3424017     | 38.937017      | 1.46E-116 | 3.2998   | up        | PREDICTED: polyadenylate-binding protein-interacting protein 9 [Sesamum indicum]                  |
| c47034.graph_c0 | 0.91002078    | 0.82812003    | 1.11625761    | 10.5222387     | 10.3149317     | 10.671247      | 9.23E-23  | 2.37091  | up        | PREDICTED: primase homolog protein isoform X2 [Sesamum indicum]                                   |
| c47036.graph_c0 | 4.378654      | 3.05247328    | 2.81337187    | 0              | 0              | 0              | 1.833E-31 | -Inf     | down      | hypothetical protein SNOG_05978 [Phaeosphaeria nodorum SN15]                                      |
| c47037.graph_c0 | 32.9645728    | 33.5582204    | 33.9811606    | 28.465211      | 29.5868197     | 25.7185695     | 1.157E-49 | -1.35425 | down      | PREDICTED: L-2-hydroxyglutarate dehydrogenase, mitochondrial isoform X1 [Sesamum indicum]         |
| c47037.graph_c1 | 27.1154278    | 23.9113203    | 17.0073849    | 8.44600142     | 10.3797617     | 8.04051289     | 2.883E-12 | -2.42638 | down      | glyceraldehyde-3-phosphate dehydrogenase [Leucophyllum frutescens]                                |

| #ID             | 0 h-1<br>FPKM | 0 h-2<br>FPKM | 0 h-3<br>FPKM | 28 h-1<br>FPKM | 28 h-2<br>FPKM | 28 h-3<br>FPKM | FDR       | log2FC   | regulated | nr_annotation                                                                                                    |
|-----------------|---------------|---------------|---------------|----------------|----------------|----------------|-----------|----------|-----------|------------------------------------------------------------------------------------------------------------------|
| c47037.graph_c3 | 252.046144    | 242.631421    | 248.036854    | 1258.09536     | 1273.83191     | 1264.96419     | 5.191E-47 | 1.26348  | up        | glyceraldehyde 3-phosphate dehydrogenase [Salvia miltiorrhiza]                                                   |
| c47037.graph_c4 | 67.8617337    | 63.2782961    | 76.63094      | 21.3187156     | 23.3145548     | 26.5818505     | 3.28E-33  | -2.63639 | down      | PREDICTED: glyceraldehyde-3-phosphate dehydrogenase, cytosolic [Sesamum indicum]                                 |
| c47049.graph_c0 | 16.1878922    | 15.1297968    | 14.2511503    | 9.42521369     | 10.0360304     | 9.06995486     | 4.562E-45 | -1.76495 | down      | PREDICTED: lycopene beta cyclase, chloroplastic/chromoplastic [Sesamum indicum]                                  |
| c47049.graph_c1 | 9.83851594    | 9.92459348    | 9.08095586    | 6.60819548     | 6.18645494     | 4.59739845     | 1.904E-74 | -1.82074 | down      | PREDICTED: uncharacterized protein At5G05190 [Sesamum indicum]                                                   |
| c47051.graph_c0 | 46.7080568    | 51.5133968    | 42.9557578    | 36.6344004     | 39.7622385     | 39.2014873     | 1.232E-33 | -1.37752 | down      | PREDICTED: nuclear transcription factor Y subunit C-9-like isoform X1 [Sesamum indicum]                          |
| c47051.graph_c1 | 36.2044343    | 35.7173563    | 35.2710022    | 36.8574425     | 33.964976      | 35.3075567     | 3.446E-28 | -1.10456 | down      | PREDICTED: probable ribonuclease P/MRP protein subunit POP5 [Sesamum indicum]                                    |
| c47061.graph_c0 | 9.55091099    | 10.07819      | 9.90282409    | 9.87353625     | 10.917331      | 9.64148684     | 4.008E-26 | -1.04799 | down      | hypothetical protein MIMGU_mgv1a005188mg [Erythranthe guttata]                                                   |
| c47064.graph_c0 | 122.479737    | 121.544928    | 116.027181    | 52.3898413     | 55.7034954     | 54.4321391     | 8.4E-163  | -2.23741 | down      | PREDICTED: pentatricopeptide repeat-containing protein At3g46790, chloroplastic-like [Nicotiana tomentosiformis] |
| c47064.graph_c1 | 0.89495602    | 0.73587858    | 0.28751348    | 3.71685073     | 3.08329535     | 2.67276061     | 0.0028149 | 1.2245   | up        | lipoxygenase [Actinidia arguta]                                                                                  |
| c47064.graph_c2 | 61.5252139    | 62.2719659    | 59.6143693    | 29.8199928     | 33.3376669     | 34.2780012     | 1.01E-123 | -2.00236 | down      | PREDICTED: RNA pseudouridine synthase 6, chloroplastic [Sesamum indicum]                                         |
| c47065.graph_c0 | 0             | 0             | 0             | 1.93453983     | 3.00821948     | 3.55177959     | 1.136E-09 | Inf      | up        | predicted protein [Physcomitrella patens]                                                                        |
| c47067.graph_c0 | 1.64347234    | 2.58518548    | 2.21249498    | 0.45503475     | 0.38517536     | 0.41771772     | 1.968E-14 | -3.44895 | down      | -                                                                                                                |
| c47068.graph_c0 | 1.61141186    | 1.55098601    | 1.39375926    | 13.5134406     | 15.0076849     | 14.0408648     | 1.678E-33 | 2.13476  | up        | hypothetical protein MIMGU_mgv1a009241mg [Erythranthe guttata]                                                   |
| c47069.graph_c0 | 28.0906474    | 24.8591972    | 26.316961     | 163.214909     | 178.519924     | 167.943381     | 9.969E-86 | 1.59462  | up        | PREDICTED: 60S ribosomal protein L2/a-5-like [Sesamum indicum]                                                   |
| c47073.graph_c0 | 0             | 0             | 0             | 3.56502552     | 4.67399564     | 6.81430716     | 9.728E-11 | Inf      | up        | component of cytosolic 80S ribosome and 40S small subunit [Volvox carteri f. nagariensis]                        |
| c47082.graph_c2 | 6.89630178    | 7.22771713    | 7.08204228    | 44.0815894     | 40.7298581     | 40.3922116     | 1.297E-48 | 1.47081  | up        | PREDICTED: uncharacterized protein LOC103719963 isoform X1 [Phoenix dactylifera]                                 |
| c47083.graph_c0 | 1.55411614    | 1.69179368    | 1.57271686    | 0.11295227     | 0.17847428     | 0.04608406     | 2.417E-50 | -4.93086 | down      | PREDICTED: pleiotropic drug resistance protein 2-like [Sesamum indicum]                                          |
| c47085.graph_c1 | 2.92182624    | 2.43729334    | 2.37795286    | 12.3166856     | 10.3538597     | 11.8408882     | 0.0002872 | 1.0693   | up        | PREDICTED: uncharacterized protein LOC105177480 [Sesamum indicum]                                                |
| c47086.graph_c0 | 56.3256488    | 52.4709027    | 46.2040406    | 54.4977895     | 52.2313776     | 54.1552006     | 1.174E-25 | -1.03429 | down      | hypothetical protein MIMGU_mgv1a001579mg [Erythranthe guttata]                                                   |
| c47088.graph_c0 | 7.75824143    | 8.73952708    | 7.78257375    | 35.9041935     | 36.0007941     | 32.6795253     | 2.409E-27 | 1.01612  | up        | PREDICTED: serine/threonine-protein kinase D6PKL2-like [Sesamum indicum]                                         |
| c47090.graph_c0 | 7.69394272    | 6.73894116    | 6.53249602    | 30.9552339     | 30.0684395     | 28.8851381     | 6.659E-11 | 1.01149  | up        | Geranylgeranyl transferase type-2 subunit beta [Morus notabilis]                                                 |
| c47092.graph_c0 | 0.11740396    | 0.18803444    | 0.15086874    | 0.97274519     | 0.67798419     | 0.91908141     | 0.0017718 | 1.4023   | up        | PREDICTED: uncharacterized protein LOC105177054 [Sesamum indicum]                                                |



| #ID             | 0 h-1<br>FPKM | 0 h-2<br>FPKM | 0 h-3<br>FPKM | 28 h-1<br>FPKM | 28 h-2<br>FPKM | 28 h-3<br>FPKM | FDR       | log2FC   | regulated | nr_annotation                                                                                         |
|-----------------|---------------|---------------|---------------|----------------|----------------|----------------|-----------|----------|-----------|-------------------------------------------------------------------------------------------------------|
| c47102.graph_c0 | 4.81657012    | 3.97340946    | 4.66543967    | 59.4407769     | 61.0233859     | 60.1588823     | 3.6E-166  | 2.65604  | up        | PREDICTED: dolichyl-diphosphooligosaccharide--protein glycosyltransferase subunit 2 [Sesamum indicum] |
| c47103.graph_c0 | 3.49395298    | 4.18709       | 3.85749215    | 19.3851635     | 20.1187449     | 19.7872613     | 1.775E-14 | 1.27005  | up        | PREDICTED: uncharacterized protein LOC105164063 [Sesamum indicum]                                     |
| c47103.graph_c2 | 398.471809    | 399.301431    | 397.543187    | 309.974195     | 316.535959     | 321.600993     | 3.993E-64 | -1.42467 | down      | PREDICTED: two-pore potassium channel 1 [Sesamum indicum]                                             |
| c47105.graph_c0 | 48.8088317    | 44.366608     | 52.1512602    | 12.7963234     | 12.1784143     | 14.6748151     | 1.264E-57 | -2.96483 | down      | R3-MYB anthocyanin repressor [Petunia x hybrida]                                                      |
| c47107.graph_c0 | 45.672473     | 42.5626968    | 43.9318457    | 11.3134779     | 11.5620441     | 11.3186218     | 0         | -3.04084 | down      | hypothetical protein MIMGU_mgv1a008454mg [Erythranthe outtata]                                        |
| c47116.graph_c0 | 19.7034079    | 19.1324082    | 18.4944944    | 16.8850267     | 15.6644745     | 17.0350621     | 6.609E-56 | -1.29891 | down      | hypothetical protein JCGZ_07037 [Jatropha curcas]                                                     |
| c47126.graph_c0 | 30.6717857    | 33.7837532    | 30.2318789    | 30.8413683     | 30.4439808     | 28.9477701     | 6.724E-32 | -1.15985 | down      | PREDICTED: INO80 complex subunit D-like [Sesamum indicum]                                             |
| c47129.graph_c0 | 0.12475197    | 0.24975378    | 0.12023341    | 1.38270242     | 1.20751784     | 1.44271087     | 3.092E-05 | 1.93979  | up        | PREDICTED: pentatricopeptide repeat-containing protein At2g41080 [Sesamum indicum]                    |
| c47134.graph_c0 | 33.974959     | 34.7371813    | 31.2031666    | 19.9200054     | 18.3600658     | 19.4844854     | 5.04E-113 | -1.87973 | down      | PREDICTED: dynamin-related protein 4C-like [Sesamum indicum]                                          |
| c47142.graph_c0 | 1.01793628    | 0.81100547    | 0.85426183    | 114.749177     | 95.7826369     | 104.821237     | 2.67E-164 | 5.78823  | up        | hypothetical protein MIMGU_mgv1a00410mg [Erythranthe outtata]                                         |
| c47143.graph_c0 | 3.14062802    | 4.16549907    | 3.32956086    | 18.0324637     | 17.8788719     | 17.0891264     | 2.825E-08 | 1.22645  | up        | PREDICTED: 15-cis-phytoene desaturase, chloroplastic/chromoplastic [Sesamum indicum]                  |
| c47145.graph_c0 | 88.0486774    | 91.6675493    | 90.4272971    | 75.5449745     | 73.7822768     | 75.3829393     | 5.883E-62 | -1.35638 | down      | PREDICTED: uncharacterized protein LOC105156360 [Sesamum indicum]                                     |
| c47147.graph_c0 | 11.76611      | 11.9960011    | 10.0488338    | 11.6483952     | 12.1061412     | 11.3858933     | 1.551E-23 | -1.03304 | down      | PREDICTED: CD11-like protein a, chloroplastic [Sesamum indicum]                                       |
| c47150.graph_c1 | 0.20756529    | 0.10388657    | 0.40009443    | 3.64571709     | 3.01932079     | 2.93384261     | 9.683E-12 | 2.65076  | up        | hypothetical protein MIMGU_mgv1a0114/0mg [Erythranthe outtata]                                        |
| c47157.graph_c0 | 0.66951509    | 0.72044942    | 0.51621204    | 3.02908318     | 2.87776813     | 3.49414021     | 6.938E-07 | 1.21593  | up        | PREDICTED: GPI mannosyltransferase 1-like isoform X2 [Sesamum indicum]                                |
| c47165.graph_c0 | 0             | 0             | 0             | 3.23400759     | 4.19418992     | 8.73243871     | 1.173E-05 | Inf      | up        | 40S ribosomal protein S8-B [Rozella allomyces CSF55]                                                  |
| c47166.graph_c0 | 154.787709    | 159.036635    | 155.603271    | 133.776226     | 131.906238     | 129.925641     | 1.424E-55 | -1.33746 | down      | PREDICTED: splicing factor U2af large subunit B isoform X2 [Sesamum indicum]                          |
| c47166.graph_c1 | 2.54027767    | 2.27037623    | 2.68143642    | 0.39562697     | 0.89303514     | 0.59185202     | 1.027E-13 | -3.08699 | down      | -                                                                                                     |
| c47175.graph_c0 | 5.75987232    | 4.30643479    | 5.57409262    | 4.05703701     | 3.54646403     | 3.77440206     | 5.245E-11 | -1.54985 | down      | PREDICTED: O-acyltransferase WSD1-like isoform X1 [Sesamum indicum]                                   |
| c47176.graph_c0 | 463.042836    | 472.071847    | 416.757961    | 184.293414     | 185.212763     | 186.683761     | 6.45E-151 | -2.37038 | down      | PREDICTED: very-long-chain (3R)-3-hydroxyacyl-CoA dehydratase PASTICCINO 2 [Sesamum indicum]          |
| c47178.graph_c2 | 0.87416788    | 0.87504323    | 1.05726149    | 10.2028158     | 10.5282126     | 10.2466638     | 2.667E-18 | 2.37115  | up        | PREDICTED: uncharacterized protein LOC105158099 [Sesamum indicum]                                     |
| c47184.graph_c2 | 14.1375266    | 14.4634706    | 13.0528692    | 9.09287352     | 8.67558694     | 9.00011914     | 1.893E-76 | -1.72724 | down      | PREDICTED: myosin-6-like [Sesamum indicum]                                                            |
| c47184.graph_c3 | 267.060312    | 265.322948    | 253.593389    | 268.610005     | 271.85165      | 258.502683     | 3.385E-36 | -1.06646 | down      | PREDICTED: calcium-dependent protein kinase 33-like [Sesamum indicum]                                 |

| #ID             | 0 h-1<br>FPKM | 0 h-2<br>FPKM | 0 h-3<br>FPKM | 28 h-1<br>FPKM | 28 h-2<br>FPKM | 28 h-3<br>FPKM | FDR       | log2FC   | regulated | nr_annotation                                                                                  |
|-----------------|---------------|---------------|---------------|----------------|----------------|----------------|-----------|----------|-----------|------------------------------------------------------------------------------------------------|
| c47184.graph_c4 | 12.7942346    | 15.6758244    | 10.1277164    | 8.10853263     | 7.72424902     | 8.43755047     | 1.412E-08 | -1.75608 | down      | PREDICTED: calcium-dependent protein kinase 10-like [Sesamum indicum]                          |
| c47185.graph_c0 | 1.15154259    | 1.56171674    | 1.33657352    | 7.96437687     | 7.72736993     | 8.85608246     | 6.053E-11 | 1.50879  | up        | PREDICTED: protein LOW PSII ACCUMULATION 1, chloroplastic [Sesamum indicum]                    |
| c47185.graph_c1 | 0.33072419    | 0.60693484    | 0.92081965    | 3.04466689     | 2.49584688     | 3.33435761     | 0.0020529 | 1.15474  | up        | PREDICTED: rapid alkalization factor-like [Sesamum indicum]                                    |
| c47186.graph_c0 | 39.490125     | 41.8058489    | 38.6685423    | 18.840324      | 17.6576648     | 17.1041987     | 5.52E-136 | -2.2526  | down      | PREDICTED: BTB/POZ domain-containing protein At1g04390 [Sesamum indicum]                       |
| c47186.graph_c1 | 42.6558914    | 41.117175     | 37.8349306    | 17.6409006     | 15.3154608     | 17.5463618     | 3.76E-105 | -2.35644 | down      | PREDICTED: BTB/POZ domain-containing protein At1g04390 [Sesamum indicum]                       |
| c47189.graph_c1 | 42.9880869    | 50.8915353    | 46.4177896    | 18.2629768     | 20.6361624     | 19.8410392     | 1.142E-48 | -2.34712 | down      | PREDICTED: inactive rhomboid protein 1-like [Sesamum indicum]                                  |
| c47192.graph_c2 | 0.19928369    | 0.19948324    | 0             | 8.11094118     | 7.32341941     | 7.24879146     | 6.27E-22  | 4.7594   | up        | -                                                                                              |
| c47197.graph_c0 | 0.40936998    | 0.29026076    | 0.24110929    | 1.59921161     | 1.60064461     | 1.62865056     | 0.0001714 | 1.27532  | up        | PREDICTED: acyltransferase-like protein At1g54570, chloroplastic isoform X1 [Nelumbo nucifera] |
| c47199.graph_c0 | 0             | 0             | 0             | 4.42726398     | 5.57085064     | 9.49271255     | 3.682E-09 | Inf      | up        | RecName: Full=60S ribosomal protein L13a [Cyanophora paradoxa]                                 |
| c47200.graph_c0 | 0             | 0             | 0             | 2.44778307     | 3.29432774     | 3.80631077     | 2.918E-15 | Inf      | up        | --                                                                                             |
| c47201.graph_c0 | 8.70754544    | 7.86230636    | 8.61897049    | 58.1332657     | 53.2224588     | 55.1649452     | 7.959E-68 | 1.63418  | up        | PREDICTED: probable serine/threonine-protein kinase At1g01540 [Sesamum indicum]                |
| c47205.graph_c0 | 0.77524342    | 0.51734647    | 0.79697479    | 8.78970225     | 8.34326558     | 9.22593976     | 1.39E-17  | 2.56536  | up        | unnamed protein product [Vitis vinifera]                                                       |
| c47206.graph_c0 | 15.7871858    | 9.25087252    | 10.2685883    | 0              | 0              | 0              | 9.172E-44 | -Inf     | down      | alpha-2 macroglobulin family-like protein [Micromonas sp. RCC799]                              |
| c47207.graph_c0 | 39.2797961    | 37.869003     | 34.4131004    | 280.940831     | 291.716788     | 231.871964     | 5.493E-26 | 1.76038  | up        | hypothetical protein MIMGU_mgv1a001548mg [Erythranae outtata]                                  |
| c47210.graph_c0 | 0             | 0             | 0             | 1.14190604     | 1.26669903     | 2.1830415      | 5.935E-07 | Inf      | up        | hypothetical protein V492_07146 [Pseudogymnoascus pannorum VKM F-4246]                         |
| c47214.graph_c1 | 3.53836707    | 3.52044408    | 3.47221008    | 1.73002904     | 1.80128752     | 1.70420182     | 5.536E-30 | -2.09876 | down      | PREDICTED: protein LONGIFOLIA 2-like [Sesamum indicum]                                         |
| c47221.graph_c0 | 6.51291471    | 6.30913201    | 5.77755354    | 53.5349108     | 67.6662923     | 53.5272901     | 7.697E-23 | 2.14191  | up        | hypothetical protein MIMGU_mgv1a01074/mg [Erythranae outtata]                                  |
| c47222.graph_c0 | 0.54154259    | 0.49691113    | 0.57991973    | 2.52553606     | 2.50243158     | 2.59609389     | 0.0001171 | 1.14443  | up        | hypothetical protein MIMGU_mgv1a000984mg [Erythranae outtata]                                  |
| c47224.graph_c0 | 0.10302809    | 0.06875417    | 0             | 1.02336304     | 0.9916107      | 0.79432145     | 8.512E-08 | 2.96244  | up        | -                                                                                              |
| c47233.graph_c0 | 9.60038565    | 8.52548499    | 9.66839785    | 7.48058526     | 7.42574396     | 7.01435648     | 7.57E-29  | -1.43377 | down      | PREDICTED: glycerophosphodiester phosphodiesterase GDPD4 isoform X3 [Sesamum indicum]          |
| c47234.graph_c0 | 179.270387    | 158.829879    | 176.282782    | 120.176792     | 135.471063     | 134.581122     | 1.11E-40  | -1.48905 | down      | PREDICTED: uncharacterized protein LOC105178088 [Sesamum indicum]                              |
| c47234.graph_c1 | 223.560896    | 244.569721    | 177.885203    | 192.413808     | 192.580942     | 193.335459     | 1.263E-10 | -1.24707 | down      | -                                                                                              |
| c47234.graph_c2 | 38.7861674    | 38.0326589    | 32.3462856    | 35.6396617     | 34.023283      | 32.7902317     | 1.975E-31 | -1.18003 | down      | PREDICTED: formin-1 isoform X1 [Sesamum indicum]                                               |
| c47234.graph_c3 | 71.2458435    | 69.2673502    | 78.725243     | 474.711472     | 476.605228     | 476.572557     | 4.61E-92  | 1.61132  | up        | hypothetical protein OsJ_19397 [Oryza sativa Japonica Group]                                   |

| #ID             | 0 h-1<br>FPKM | 0 h-2<br>FPKM | 0 h-3<br>FPKM | 28 h-1<br>FPKM | 28 h-2<br>FPKM | 28 h-3<br>FPKM | FDR       | log2FC   | regulated | nr_annotation                                                                              |
|-----------------|---------------|---------------|---------------|----------------|----------------|----------------|-----------|----------|-----------|--------------------------------------------------------------------------------------------|
| c47234.graph_c6 | 65.6647471    | 70.6830291    | 59.3397382    | 39.9214802     | 40.2859835     | 41.0388709     | 4.187E-57 | -1.77953 | down      | PREDICTED: uncharacterized protein LOC105169758 [Sesamum indicum]                          |
| c47235.graph_c0 | 25.0054393    | 25.482642     | 26.6185456    | 8.98137925     | 8.6598471      | 7.80710889     | 8.06E-150 | -2.69116 | down      | PREDICTED: aspartic proteinase-like protein 1 isoform X1 [Sesamum indicum]                 |
| c47238.graph_c0 | 3.17265212    | 3.22322949    | 3.04252507    | 19.6858946     | 19.2816221     | 18.2820936     | 6.908E-34 | 1.51042  | up        | PREDICTED: WUSCHEL-related homeobox 8 [Sesamum indicum]                                    |
| c47239.graph_c0 | 108.309949    | 111.207238    | 107.326854    | 44.7542759     | 42.2638818     | 41.5242216     | 4.74E-186 | -2.43688 | down      | PREDICTED: transcription factor GTE8 [Sesamum indicum]                                     |
| c47240.graph_c0 | 1.36206804    | 0.43824598    | 0.71887788    | 0              | 0              | 0              | 3.607E-08 | -Inf     | down      | sucrose synthase 1 [Oncidium hybrid cultivar]                                              |
| c47246.graph_c0 | 0             | 0             | 0             | 3.6459255      | 4.28817053     | 7.98564828     | 9.265E-08 | Inf      | up        | allergen Ale o 13 [Metarhizium acridum CQMa 102]                                           |
| c47250.graph_c1 | 2.91526028    | 1.93114818    | 2.75457712    | 2.21227059     | 2.7570753      | 2.51710252     | 0.0001995 | -1.11289 | down      | PREDICTED: uncharacterized protein LOC105163644 [Sesamum indicum]                          |
| c47250.graph_c2 | 0.49216111    | 0.36949045    | 0.39527907    | 1.87792425     | 1.9378166      | 2.73637652     | 0.003544  | 1.29554  | up        | -                                                                                          |
| c47250.graph_c3 | 74.8056247    | 74.3808517    | 79.9999135    | 354.197274     | 372.406138     | 371.321904     | 3.759E-50 | 1.16877  | up        | PREDICTED: 60S ribosomal protein L6-like [Sesamum indicum]                                 |
| c47253.graph_c0 | 1171.19964    | 1109.53842    | 1166.40438    | 480.018153     | 483.024001     | 484.772938     | 8.42E-118 | -2.34215 | down      | PREDICTED: ABC transporter G family member 5 [Sesamum indicum]                             |
| c47256.graph_c0 | 3.3152479     | 3.01380121    | 3.5646779     | 3.07334575     | 3.39653031     | 3.77176886     | 2.233E-06 | -1.0413  | down      | PREDICTED: CDPK-related protein kinase-like [Sesamum indicum]                              |
| c47259.graph_c0 | 31.5861763    | 33.5153306    | 31.0217555    | 27.9696        | 27.9217002     | 30.5028591     | 3.892E-50 | -1.24366 | down      | PREDICTED: uncharacterized protein LOC105174955 isoform X1 [Sesamum indicum]               |
| c47262.graph_c0 | 1.30872502    | 1.52291628    | 1.51358712    | 7.3121486      | 6.61291986     | 7.0629655      | 7.132E-14 | 1.18022  | up        | PREDICTED: putative chloride channel-like protein CLC-g [Sesamum indicum]                  |
| c47266.graph_c0 | 0             | 0             | 0             | 1.1476099      | 1.05670264     | 1.95632579     | 2.432E-10 | Inf      | up        | --                                                                                         |
| c47269.graph_c0 | 30.0996563    | 31.892566     | 29.9059188    | 29.7131156     | 28.534919      | 27.9411545     | 1.452E-43 | -1.18298 | down      | PREDICTED: uncharacterized protein LOC105174622 [Sesamum indicum]                          |
| c47269.graph_c1 | 59.7904738    | 62.7437367    | 62.0786895    | 57.4801359     | 53.0583427     | 54.5856252     | 1.208E-53 | -1.25185 | down      | PREDICTED: uncharacterized protein LOC105168306 isoform X2 [Sesamum indicum]               |
| c47270.graph_c0 | 5.09966745    | 3.14139938    | 3.94113016    | 0              | 0              | 0              | 1.66E-38  | -Inf     | down      | -                                                                                          |
| c47277.graph_c1 | 62.921997     | 67.0361067    | 56.6805659    | 55.2470361     | 51.8114987     | 52.4386908     | 1.418E-41 | -1.31577 | down      | PREDICTED: zinc finger CCCH domain-containing protein 44-like isoform X4 [Sesamum indicum] |
| c47283.graph_c0 | 8.83854777    | 9.62009677    | 9.27477848    | 40.5064421     | 38.5997532     | 39.55364       | 2.399E-21 | 1.00625  | up        | PREDICTED: probable trehalose-phosphate phosphatase J [Sesamum indicum]                    |
| c47287.graph_c0 | 36.5231047    | 35.0221205    | 31.4718537    | 28.8395412     | 28.6433419     | 27.4549684     | 3.671E-51 | -1.36732 | down      | PREDICTED: GATA transcription factor 15-like [Sesamum indicum]                             |
| c47290.graph_c0 | 0             | 0             | 0             | 2.80542034     | 2.58174368     | 5.39282714     | 2.222E-08 | Inf      | up        | --                                                                                         |
| c47293.graph_c0 | 1.03268034    | 0.91028582    | 0.75264678    | 5.98196458     | 5.44161123     | 5.04577023     | 2.741E-16 | 1.52383  | up        | PREDICTED: uncharacterized protein LOC105174459 isoform X2 [Sesamum indicum]               |
| c47294.graph_c0 | 3.57713678    | 2.97327538    | 2.38046624    | 20.7058877     | 18.8421886     | 19.2824667     | 1.305E-29 | 1.6339   | up        | PREDICTED: uncharacterized protein LOC105159979 [Sesamum indicum]                          |

| #ID             | 0 h-1<br>FPKM | 0 h-2<br>FPKM | 0 h-3<br>FPKM | 28 h-1<br>FPKM | 28 h-2<br>FPKM | 28 h-3<br>FPKM | FDR       | log2FC   | regulated | nr_annotation                                                                                     |
|-----------------|---------------|---------------|---------------|----------------|----------------|----------------|-----------|----------|-----------|---------------------------------------------------------------------------------------------------|
| c47295.graph_c0 | 0             | 0             | 0             | 0.76913499     | 1.03176436     | 1.68557542     | 1.301E-06 | Inf      | up        | --                                                                                                |
| c47296.graph_c0 | 166.821295    | 170.652449    | 175.434841    | 163.860243     | 159.693946     | 160.804113     | 3.179E-47 | -1.17379 | down      | PREDICTED: NEDD8-activating enzyme E1 catalytic subunit [Sesamum indicum]                         |
| c47297.graph_c0 | 318.434749    | 304.932656    | 307.966573    | 259.130574     | 271.872818     | 260.898694     | 1.567E-54 | -1.32433 | down      | PREDICTED: pentatricopeptide repeat-containing protein At5g15340, mitochondrial [Sesamum indicum] |
| c47300.graph_c0 | 161.61969     | 170.012016    | 149.513931    | 27.1568323     | 27.8533034     | 27.0172014     | 0         | -3.64179 | down      | PREDICTED: chaperone protein ClpD, chloroplastic [Sesamum indicum]                                |
| c47302.graph_c1 | 2.07434105    | 2.44186779    | 1.91923947    | 16.1978598     | 16.1061765     | 16.3568042     | 3.186E-52 | 1.82964  | up        | PREDICTED: paladin [Sesamum indicum]                                                              |
| c47303.graph_c0 | 3.95417446    | 2.17697368    | 2.37125967    | 0.7184678      | 0.90819269     | 1.0943592      | 3.699E-06 | -2.72734 | down      | hypothetical protein M569_00480, partial [Genlisea aurea]                                         |
| c47312.graph_c1 | 59.2010528    | 60.9296388    | 58.8723506    | 60.0627069     | 56.1764994     | 68.7907727     | 3.998E-35 | -1.04173 | down      | hypothetical protein MIMGU_mgv1a004264mg [Erythranthe diffusa]                                    |
| c47315.graph_c0 | 9.77123146    | 10.2157277    | 9.46560838    | 3.89681638     | 3.79248318     | 4.12082387     | 4.63E-111 | -2.40801 | down      | PREDICTED: uncharacterized protein LOC105167449 isoform X2 [Sesamum indicum]                      |
| c47316.graph_c0 | 4.10239494    | 4.36862007    | 5.1034929     | 2.28377642     | 2.5202662      | 2.25178102     | 2.299E-18 | -2.03775 | down      | PREDICTED: putative pentatricopeptide repeat-containing protein At1g53330 [Sesamum indicum]       |
| c47327.graph_c0 | 5.97779165    | 3.08805661    | 3.81341483    | 0              | 0              | 0              | 7.016E-29 | -Inf     | down      | alpha-2 macroglobulin family-like protein [Micromonas sp. RCC799]                                 |
| c47328.graph_c0 | 25.7565265    | 25.9997372    | 25.4225474    | 127.249199     | 112.138443     | 121.471004     | 4.333E-37 | 1.13499  | up        | PREDICTED: DNA repair protein RAD16 [Sesamum indicum]                                             |
| c47331.graph_c0 | 15.4930184    | 17.4470989    | 15.879911     | 8.89201217     | 8.89607059     | 9.17003037     | 8.447E-73 | -1.94712 | down      | PREDICTED: uncharacterized protein LOC104812881 [Tarenaya hassleriana]                            |
| c47334.graph_c0 | 477.83099     | 438.829954    | 522.768726    | 304.889002     | 407.318576     | 341.938915     | 2.525E-17 | -1.54192 | down      | PREDICTED: em-like protein GEA6 [Sesamum indicum]                                                 |
| c47334.graph_c1 | 11.3596507    | 9.82919169    | 9.15442769    | 1.46931103     | 1.89521443     | 2.16952098     | 4.702E-42 | -3.54199 | down      | hypothetical protein M569_09902, partial [Genlisea aurea]                                         |
| c47334.graph_c2 | 67.917916     | 64.7581071    | 65.3499988    | 70.6745811     | 64.8264672     | 68.8652086     | 5.533E-38 | -1.04455 | down      | PREDICTED: probable E3 ubiquitin-protein ligase ARI8 [Sesamum indicum]                            |
| c47342.graph_c1 | 2.17573899    | 1.92943042    | 2.34556271    | 10.1246583     | 9.74530889     | 9.90703822     | 4.09E-19  | 1.11474  | up        | PREDICTED: pentatricopeptide repeat-containing protein At5g50990 [Sesamum indicum]                |
| c47345.graph_c0 | 0             | 0             | 0.27463156    | 3.18419219     | 4.69821485     | 5.06980453     | 1.528E-10 | 4.43032  | up        | PREDICTED: 40S ribosomal protein S24-1-like [Musa acuminata subsp. malaccensis]                   |
| c47346.graph_c0 | 0             | 2.0899367     | 1.60977889    | 71.6229069     | 76.4516386     | 87.170275      | 2.48E-35  | 4.88838  | up        | PREDICTED: probable aquaporin PIP-type pTOM75 [Sesamum indicum]                                   |
| c47348.graph_c0 | 23.7092651    | 25.8805406    | 19.1569613    | 19.3507436     | 17.2192143     | 19.4113203     | 5.264E-13 | -1.38356 | down      | hypothetical protein MIMGU_mgv1a010183mg [Erythranthe diffusa]                                    |
| c47349.graph_c0 | 1.34228618    | 2.39516702    | 0.82494782    | 7.38036782     | 7.85100537     | 7.8913157      | 0.0002062 | 1.25762  | up        | Ubiquitin carboxyl-terminal hydrolase [Medicago truncatula]                                       |
| c47350.graph_c3 | 11.9110197    | 11.0872262    | 9.63189605    | 10.5985862     | 9.26515523     | 10.023735      | 6.794E-25 | -1.21446 | down      | PREDICTED: uncharacterized protein LOC105166536 [Sesamum indicum]                                 |
| c47351.graph_c0 | 1.9138469     | 2.37189745    | 2.75215106    | 0.29806562     | 0.32893093     | 0.67560865     | 3.785E-17 | -3.52456 | down      | hypothetical protein MIMGU_mgv1a003544mg [Erythranthe diffusa]                                    |
| c47352.graph_c0 | 3.93001002    | 4.30699187    | 4.09241842    | 22.6042356     | 21.6545296     | 22.4432697     | 2.68E-24  | 1.34492  | up        | RUBISCO SUBUNIT BINDING-protein ALPHA SUBUNIT [Populus trichocarpa]                               |

| #ID             | 0 h-1<br>FPKM | 0 h-2<br>FPKM | 0 h-3<br>FPKM | 28 h-1<br>FPKM | 28 h-2<br>FPKM | 28 h-3<br>FPKM | FDR       | log2FC   | regulated | nr_annotation                                                                                 |
|-----------------|---------------|---------------|---------------|----------------|----------------|----------------|-----------|----------|-----------|-----------------------------------------------------------------------------------------------|
| c47357.graph_c0 | 33.1769776    | 31.6526021    | 33.1595676    | 32.0965948     | 30.5240444     | 29.6840987     | 1.209E-46 | -1.17711 | down      | hypothetical protein MIMGU_mgv1a004228mg [Erythranthe guttata]                                |
| c47358.graph_c0 | 7.38837045    | 6.65939354    | 6.74057646    | 1.02282382     | 0.90252506     | 1.13811257     | 2.912E-92 | -3.85122 | down      | hypothetical protein MIMGU_mgv1a009769mg [Erythranthe guttata]                                |
| c47359.graph_c0 | 58.4066837    | 63.282334     | 52.6404133    | 41.2469626     | 39.203419      | 40.3465626     | 5.329E-44 | -1.61814 | down      | hypothetical protein VITISV_031499 [Vitis vinifera]                                           |
| c47360.graph_c1 | 1.3065725     | 0.85012254    | 1.17529817    | 0.59350585     | 0.72879699     | 0.46492409     | 3.43E-08  | -1.99063 | down      | -                                                                                             |
| c47362.graph_c2 | 2.3749482     | 1.65092108    | 1.86505151    | 0.71920778     | 1.12558713     | 0.86073925     | 4.644E-09 | -2.21148 | down      | hypothetical protein MIMGU_mgv1a005741mg [Erythranthe guttata]                                |
| c47364.graph_c0 | 11.817542     | 11.5490585    | 13.0268611    | 2.48305311     | 1.92955931     | 2.87314863     | 2.382E-83 | -3.41095 | down      | PREDICTED: pleiotropic drug resistance protein 1-like [Sesamum indicum]                       |
| c47367.graph_c0 | 13.1885499    | 10.4195679    | 12.1505984    | 56.3040998     | 50.7657968     | 52.0361125     | 4.06E-25  | 1.06351  | up        | PREDICTED: inositol transporter 1 [Sesamum indicum]                                           |
| c47367.graph_c4 | 37.5855224    | 36.9899498    | 36.8056015    | 29.5263057     | 27.754923      | 28.0114995     | 2.923E-73 | -1.47538 | down      | PREDICTED: ubiquitin carboxyl-terminal hydrolase 5 [Sesamum indicum]                          |
| c47370.graph_c0 | 39.1110723    | 38.2916783    | 35.4586122    | 28.5681866     | 27.0165723     | 23.8346057     | 1.17E-82  | -1.59697 | down      | PREDICTED: hexokinase-3-like [Sesamum indicum]                                                |
| c47371.graph_c0 | 0.18052678    | 0.18070755    | 0.27838087    | 3.28014552     | 3.34075684     | 2.2911456      | 8.446E-11 | 2.70213  | up        | PREDICTED: DNA repair protein RAD51 homolog 2 isoform X3 [Sesamum indicum]                    |
| c47373.graph_c1 | 3.24609284    | 3.05359974    | 3.11595403    | 20.8352298     | 22.0973465     | 21.2227289     | 1.156E-28 | 1.67815  | up        | PREDICTED: acyl-protein thioesterase 2-like [Sesamum indicum]                                 |
| c47378.graph_c0 | 29.9811228    | 31.1516573    | 30.7756101    | 24.8913818     | 25.6705783     | 24.8689207     | 1.119E-59 | -1.37593 | down      | PREDICTED: E3 ubiquitin protein ligase RIE1-like isoform X2 [Sesamum indicum]                 |
| c47382.graph_c0 | 0             | 0             | 0             | 5.53161268     | 8.79471166     | 13.4431273     | 3.998E-07 | Inf      | up        | ubiquitin/40S ribosomal protein S2/a fusion [Walleria sebi CBS 633.661]                       |
| c47383.graph_c0 | 6.23280714    | 3.44126882    | 4.59732603    | 0              | 0              | 0              | 3.223E-31 | -Inf     | down      | --                                                                                            |
| c47388.graph_c0 | 0.51101114    | 0.34101523    | 0.21888985    | 1.60939979     | 1.90025623     | 1.76784608     | 0.0080753 | 1.21993  | up        | -                                                                                             |
| c47389.graph_c0 | 4.23416533    | 2.78842448    | 4.24785297    | 2.07857242     | 2.55921274     | 2.35691557     | 1.768E-06 | -1.78005 | down      | PREDICTED: uncharacterized protein LOC104811210 [Tarenaya hassleriana]                        |
| c47391.graph_c0 | 4.97260435    | 7.27492997    | 6.38999346    | 2.91904861     | 3.13765144     | 2.49534458     | 2.239E-09 | -2.21735 | down      | -                                                                                             |
| c47395.graph_c0 | 4.86723221    | 4.33076089    | 3.99598555    | 24.6149394     | 24.4430445     | 24.9366001     | 5.634E-15 | 1.39937  | up        | hypothetical protein MIMGU_mgv1a009112mg [Erythranthe guttata]                                |
| c47396.graph_c0 | 8.15458655    | 8.95142384    | 9.31463695    | 6.48979135     | 6.28191426     | 6.85315108     | 8.268E-28 | -1.52066 | down      | hypothetical protein MIMGU_mgv1a001551mg [Erythranthe guttata]                                |
| c47400.graph_c0 | 11.8269707    | 7.08214741    | 6.78487747    | 0              | 0              | 0              | 4.895E-27 | -Inf     | down      | glyceraldehyde-3-phosphate dehydrogenase 5 [Pflorobus crystallinell]                          |
| c47404.graph_c1 | 22.297474     | 22.6812558    | 22.3598871    | 24.9318086     | 22.8369039     | 21.843195      | 3.276E-33 | -1.04298 | down      | PREDICTED: uncharacterized protein LOC105169219 [Sesamum indicum]                             |
| c47411.graph_c0 | 23.8290284    | 24.1512061    | 22.0204888    | 22.4629987     | 20.7057113     | 21.2826886     | 1.267E-50 | -1.20862 | down      | PREDICTED: mediator of RNA polymerase II transcription subunit 13 [Sesamum indicum]           |
| c47412.graph_c0 | 260.870499    | 263.526052    | 267.529967    | 48.6547339     | 50.8567567     | 47.6989809     | 0         | -3.51859 | down      | PREDICTED: L-type lectin-domain containing receptor kinase IV.1 [Sesamum indicum]             |
| c47419.graph_c0 | 10.5038195    | 11.8378205    | 8.19623108    | 47.9045195     | 41.4939155     | 42.1317812     | 1.964E-11 | 1.01945  | up        | unnamed protein product [Coffea canephora]                                                    |
| c47421.graph_c1 | 96.93358      | 91.5459834    | 93.422616     | 86.9142242     | 83.1810235     | 84.0500244     | 3.828E-53 | -1.23978 | down      | PREDICTED: probable serine/threonine-protein kinase DDB_G0282963 isoform X2 [Sesamum indicum] |

| #ID             | 0 h-1<br>FPKM | 0 h-2<br>FPKM | 0 h-3<br>FPKM | 28 h-1<br>FPKM | 28 h-2<br>FPKM | 28 h-3<br>FPKM | FDR       | log2FC   | regulated | nr_annotation                                                                                                                               |
|-----------------|---------------|---------------|---------------|----------------|----------------|----------------|-----------|----------|-----------|---------------------------------------------------------------------------------------------------------------------------------------------|
| c47421.graph_c2 | 12.0693212    | 14.9352824    | 12.1308335    | 11.3044864     | 11.0799859     | 12.5308632     | 1.435E-12 | -1.25401 | down      | PREDICTED: transcription factor bHLH48-like isoform X2 [Sesamum indicum]                                                                    |
| c47423.graph_c0 | 19.045105     | 20.6490619    | 17.1888961    | 19.0003344     | 17.7526496     | 17.344321      | 2.438E-27 | -1.16164 | down      | PREDICTED: mediator of RNA polymerase II transcription subunit 12 isoform X1 [Sesamum indicum]                                              |
| c47426.graph_c0 | 18.8616889    | 18.1192624    | 17.8713489    | 8.51257774     | 8.21367405     | 7.80963547     | 6.83E-123 | -2.25089 | down      | PREDICTED: sucrose transport protein SUC3 isoform X2 [Sesamum indicum]                                                                      |
| c47429.graph_c0 | 31.8594916    | 29.723375     | 31.1251361    | 18.8414646     | 17.9125877     | 17.590446      | 4.29E-111 | -1.86116 | down      | PREDICTED: pentatricopeptide repeat-containing protein At1g03560, mitochondrial [Sesamum indicum]                                           |
| c47432.graph_c0 | 0.72185187    | 0.72257469    | 0.9469334     | 4.44849116     | 5.01331149     | 3.99560133     | 3.391E-13 | 1.39727  | up        | PREDICTED: ABC transporter C family member 15 [Sesamum indicum]                                                                             |
| c47433.graph_c1 | 3.41132882    | 2.59817536    | 2.28714396    | 1.88644988     | 1.65462202     | 1.36340453     | 4.445E-08 | -1.84547 | down      | hypothetical protein VITISV_042890 [Vitis vinifera]                                                                                         |
| c47434.graph_c0 | 18.0655343    | 20.3932888    | 19.3064631    | 13.6253951     | 13.5929215     | 13.170804      | 4.998E-50 | -1.60745 | down      | PREDICTED: type I inositol 1,4,5-trisphosphate 5-phosphatase 2 isoform X1 [Sesamum indicum]                                                 |
| c47435.graph_c0 | 21.3837584    | 24.1377461    | 23.0355673    | 2.51310856     | 2.38852779     | 2.75222313     | 1.6E-119  | -4.2536  | down      | PREDICTED: protein TIC 62, chloroplastic [Sesamum indicum]                                                                                  |
| c47437.graph_c1 | 13.0304915    | 11.5467399    | 13.7937876    | 3.10507741     | 3.60962698     | 3.42051904     | 4.109E-53 | -3.01238 | down      | hypothetical protein MIMGU_mgv1a006504mg [Erythranthe outtata]                                                                              |
| c47438.graph_c0 | 6.17812351    | 6.47089994    | 5.38311966    | 49.3158078     | 48.3939224     | 44.8972403     | 3.88E-105 | 1.89439  | up        | PREDICTED: clustered mitochondria protein [Sesamum indicum]                                                                                 |
| c47439.graph_c1 | 50.7544499    | 55.6217636    | 50.9926915    | 36.5088385     | 36.7112708     | 36.907728      | 1.952E-84 | -1.60527 | down      | PREDICTED: long chain base biosynthesis protein 2a [Sesamum indicum]                                                                        |
| c47448.graph_c0 | 20.6730004    | 23.2276239    | 21.2645471    | 21.4983811     | 20.7030398     | 23.1583286     | 1.434E-24 | -1.08578 | down      | PREDICTED: ADP-ribosylation factor-related protein 1 [Nicotiana tomentosiformis]                                                            |
| c47449.graph_c0 | 1.86459419    | 2.5451745     | 2.55944627    | 0.12319785     | 0              | 0.07539633     | 4.517E-35 | -6.2241  | down      | PREDICTED: E3 ubiquitin-protein ligase CHIP-like [Glycine max]                                                                              |
| c47449.graph_c1 | 9.40506853    | 8.95524305    | 8.35203464    | 8.16931538     | 7.72736993     | 4.98823408     | 6.268E-13 | -1.44615 | down      | hypothetical protein MIMGU_mgv1a013929mg [Erythranthe outtata]                                                                              |
| c47451.graph_c0 | 0.57854054    | 0.71073802    | 0.60827523    | 3.23005039     | 3.48591359     | 3.41548609     | 5.029E-06 | 1.32608  | up        | PREDICTED: uncharacterized protein LOC105174442 [Sesamum indicum]                                                                           |
| c47452.graph_c0 | 15.2717543    | 9.33425657    | 10.1289336    | 0              | 0              | 0              | 3.832E-41 | -Inf     | down      | lectin [Bryopsis maxima]                                                                                                                    |
| c47453.graph_c0 | 45.5899734    | 45.7866362    | 44.5881263    | 18.4860415     | 17.2059549     | 19.77263       | 1.04E-166 | -2.38327 | down      | PREDICTED: probable plastidic glucose transporter 2-like isoform X2 [Glycine max]                                                           |
| c47456.graph_c0 | 0.48088662    | 0.30632519    | 0.33706819    | 3.27264356     | 3.08398745     | 2.70934048     | 3.858E-10 | 1.92399  | up        | PREDICTED: SWI/SNF-related matrix-associated actin-dependent regulator of chromatin subfamily A-like protein 1 isoform X3 [Sesamum indicum] |
| c47458.graph_c0 | 0             | 0             | 0             | 9.66441683     | 11.6524856     | 19.2824401     | 5.564E-12 | Inf      | up        | --                                                                                                                                          |
| c47458.graph_c1 | 0             | 0             | 0             | 4.94459416     | 7.41047076     | 10.6495401     | 4.264E-12 | Inf      | up        | --                                                                                                                                          |
| c47462.graph_c0 | 0.51065417    | 0.96852413    | 0.69074824    | 3.43793311     | 2.64556642     | 3.79356496     | 0.0010699 | 1.09574  | up        | PREDICTED: leucine-rich repeat receptor-like serine/threonine-protein kinase BAM3 [Sesamum indicum]                                         |
| c47466.graph_c0 | 0.29556557    | 0.32544769    | 0.34183211    | 4.01704707     | 4.86834885     | 4.68017819     | 3.408E-17 | 2.72438  | up        | hypothetical protein MIMGU_mgv1a004441mg [Erythranthe outtata]                                                                              |
| c47468.graph_c0 | 80.0914389    | 73.4736252    | 75.0244425    | 46.8130135     | 49.7090334     | 53.7391683     | 1.655E-89 | -1.69473 | down      | hypothetical protein MIMGU_mgv1a012557mg [Erythranthe outtata]                                                                              |

| #ID             | 0 h-1<br>FPKM | 0 h-2<br>FPKM | 0 h-3<br>FPKM | 28 h-1<br>FPKM | 28 h-2<br>FPKM | 28 h-3<br>FPKM | FDR       | log2FC   | regulated | nr_annotation                                                                                     |
|-----------------|---------------|---------------|---------------|----------------|----------------|----------------|-----------|----------|-----------|---------------------------------------------------------------------------------------------------|
| c47468.graph_c1 | 17.1266498    | 2.60112821    | 2.42851565    | 13005.4582     | 11549.5541     | 11593.6636     | 0         | 9.60229  | up        | PREDICTED: non-specific lipid-transfer protein 1-like [Sesamum indicum]                           |
| c47468.graph_c2 | 16.1569824    | 19.8251653    | 18.52985      | 13.5105353     | 18.4691304     | 14.8366921     | 1.015E-09 | -1.31191 | down      | PREDICTED: zinc finger protein ZAT11-like [Nicotiana tomentosiformis]                             |
| c47468.graph_c3 | 63.8762735    | 63.5020891    | 82.5335188    | 1.56941213     | 1.26383936     | 1.22871015     | 1.436E-57 | -6.78606 | down      | PREDICTED: LOW QUALITY PROTEIN: small heat shock protein, chloroplastic-like [Sesamum indicum]    |
| c47471.graph_c1 | 0.36412477    | 0.24299292    | 0.07798579    | 1.58786269     | 1.1150931      | 1.2237006      | 0.0026373 | 1.44351  | up        | PREDICTED: protein DYAD-like [Sesamum indicum]                                                    |
| c47474.graph_c0 | 95.7833967    | 93.7327576    | 89.6997632    | 43.0197213     | 46.1675154     | 45.0658341     | 2.36E-151 | -2.14618 | down      | PREDICTED: ankyrin repeat domain-containing protein 6 [Sesamum indicum]                           |
| c47474.graph_c2 | 3.32174435    | 4.13865167    | 4.04152125    | 4.28910124     | 3.73351893     | 3.91901788     | 4.473E-07 | -1.03829 | down      | hypothetical protein MIMGU_mgv1a025582mg, partial [Erythranthe guttata]                           |
| c47475.graph_c0 | 462.409017    | 271.598512    | 313.741882    | 0              | 0              | 0              | 6.814E-65 | -Inf     | down      | --                                                                                                |
| c47476.graph_c0 | 30.2165419    | 29.5019636    | 26.8563452    | 11.1687088     | 10.1904474     | 10.1496448     | 4.83E-157 | -2.54741 | down      | PREDICTED: uncharacterized protein LOC105163261 [Sesamum indicum]                                 |
| c47482.graph_c3 | 41.7415311    | 41.750762     | 41.2643853    | 13.3598518     | 12.7885902     | 13.5642046     | 1.03E-202 | -2.74163 | down      | PREDICTED: YTH domain-containing family protein 2-like isoform X2 [Sesamum indicum]               |
| c47487.graph_c0 | 0.28142601    | 0.42256172    | 0.18082178    | 2.99990241     | 3.32422847     | 3.11550383     | 8.819E-08 | 2.33057  | up        | PREDICTED: vinorine synthase-like [Sesamum indicum]                                               |
| c47492.graph_c0 | 13.5790167    | 12.7012951    | 16.5198836    | 101.482377     | 104.155485     | 106.473161     | 6.889E-79 | 1.77303  | up        | PREDICTED: uncharacterized protein LOC105161817 [Sesamum indicum]                                 |
| c47495.graph_c2 | 72.8984159    | 76.5802252    | 74.4589671    | 54.2256524     | 52.6196989     | 52.7275908     | 2.307E-81 | -1.5796  | down      | PREDICTED: uncharacterized protein LOC105175572 isoform X2 [Sesamum indicum]                      |
| c47495.graph_c3 | 0             | 0             | 0.16423398    | 44.1216343     | 44.240813      | 39.4136937     | 2.46E-147 | 8.47294  | up        | hypothetical protein M569_11087, partial [Genlisea aurea]                                         |
| c47497.graph_c0 | 0             | 0             | 0             | 3.30911995     | 5.22869385     | 6.69860994     | 1.209E-09 | Inf      | up        | alpha-tubulin, partial [Syntrichia caninervis]                                                    |
| c47498.graph_c0 | 93.9221566    | 89.3994331    | 82.4562682    | 65.4661018     | 68.2732977     | 66.4029094     | 3.918E-76 | -1.49823 | down      | hypothetical protein MIMGU_mgv1a005594mg [Erythranthe guttata]                                    |
| c47499.graph_c0 | 14.4408307    | 13.4744945    | 13.332356     | 14.0162013     | 13.4965997     | 14.2176367     | 8.489E-39 | -1.0727  | down      | replication factor C / DNA polymerase III gamma-tau subunit, putative [Ricinus communis]          |
| c47500.graph_c0 | 4.81071851    | 3.5400695     | 3.27476998    | 52.3893388     | 54.1966996     | 50.6760859     | 1.92E-147 | 2.67132  | up        | hypothetical protein MIMGU_mgv1a001160mg [Erythranthe guttata]                                    |
| c47501.graph_c0 | 147.700461    | 158.649894    | 135.016049    | 121.354522     | 117.298925     | 123.993692     | 4.187E-46 | -1.37237 | down      | PREDICTED: malonate--CoA ligase [Camelina sativa]                                                 |
| c47502.graph_c0 | 898.215909    | 944.828922    | 878.431335    | 348.351608     | 357.057643     | 346.095584     | 1.95E-118 | -2.46215 | down      | PREDICTED: probable inactive receptor kinase At1g27190 [Sesamum indicum]                          |
| c47503.graph_c0 | 1.68796457    | 1.72037581    | 1.18314617    | 9.21217467     | 8.27745044     | 8.70013159     | 4.185E-12 | 1.42598  | up        | PREDICTED: pentatricopeptide repeat-containing protein At1g80270, mitochondrial [Sesamum indicum] |
| c47506.graph_c0 | 9.98219732    | 9.61448122    | 8.90432574    | 161.953617     | 162.143934     | 147.369934     | 5.89E-245 | 2.95848  | up        | -                                                                                                 |
| c47507.graph_c3 | 2.1221453     | 2.26132       | 1.583443      | 0.49753644     | 0.80861177     | 0.64957708     | 3.921E-12 | -2.69645 | down      | PREDICTED: uncharacterized protein LOC105173228 [Sesamum indicum]                                 |

| #ID             | 0 h-1<br>FPKM | 0 h-2<br>FPKM | 0 h-3<br>FPKM | 28 h-1<br>FPKM | 28 h-2<br>FPKM | 28 h-3<br>FPKM | FDR       | log2FC   | regulated | nr_annotation                                                                                              |
|-----------------|---------------|---------------|---------------|----------------|----------------|----------------|-----------|----------|-----------|------------------------------------------------------------------------------------------------------------|
| c47508.graph_c0 | 5.72549101    | 6.22959155    | 6.20587665    | 31.0465723     | 33.7496558     | 31.8591092     | 1.593E-23 | 1.32049  | up        | PREDICTED: probable serine/threonine-protein kinase At5g41260 [Sesamum indicum]                            |
| c47511.graph_c1 | 63.0128752    | 64.7325457    | 65.0141737    | 58.5812595     | 58.1475576     | 59.9439054     | 1.196E-49 | -1.21648 | down      | hypothetical protein MIMGU_mgv1a002091mg [Erythranthe guttata]                                             |
| c47512.graph_c1 | 3.81854803    | 2.31229895    | 2.48378273    | 14.9729078     | 17.1077344     | 15.4329733     | 1.757E-13 | 1.37731  | up        | PREDICTED: glycosyltransferase family protein 64 protein C5 [Sesamum indicum]                              |
| c47513.graph_c0 | 12.1801989    | 9.79231767    | 12.570928     | 66.2194759     | 59.0347363     | 66.4340592     | 7.866E-26 | 1.38105  | up        | -                                                                                                          |
| c47517.graph_c0 | 113.42782     | 115.788633    | 121.05734     | 55.8429297     | 56.9215098     | 55.2034264     | 6.77E-106 | -2.15178 | down      | PREDICTED: calcium and calcium/calmodulin-dependent serine/threonine-protein kinase-like [Sesamum indicum] |
| c47522.graph_c1 | 8.09712044    | 8.69990557    | 8.79345768    | 0.5757007      | 0.6353157      | 0.56111067     | 2.84E-213 | -4.94394 | down      | PREDICTED: ABC transporter C family member 4-like [Sesamum indicum]                                        |
| c47524.graph_c0 | 63.113418     | 67.9381945    | 60.760191     | 62.0087973     | 59.9837147     | 60.4949781     | 2.344E-47 | -1.16174 | down      | PREDICTED: histone-lysine N-methyltransferase ASHH2 [Sesamum indicum]                                      |
| c47525.graph_c0 | 0             | 0             | 0             | 0.8983183      | 0.62126594     | 1.23209812     | 6.694E-08 | Inf      | up        | glycoside hydrolase family 13 protein [Serpula lacrymans var. lacrymans S7.9]                              |
| c47526.graph_c0 | 1.37936907    | 1.21830909    | 0.93840558    | 11.2046073     | 10.5959224     | 8.78196534     | 1.203E-17 | 2.0256   | up        | -                                                                                                          |
| c47533.graph_c1 | 1.72960211    | 2.17909285    | 1.83939905    | 10.1215393     | 10.0976902     | 9.86846713     | 1.218E-12 | 1.29728  | up        | PREDICTED: riboflavin biosynthesis protein PYRR, chloroplastic [Sesamum indicum]                           |
| c47533.graph_c2 | 23.9202255    | 23.2670932    | 24.17985      | 3.62002993     | 2.7439659      | 2.77157444     | 2.65E-171 | -4.05686 | down      | hypothetical protein MIMGU_mgv1a0267602mg, partial [Erythranthe guttata]                                   |
| c47540.graph_c0 | 0.68129576    | 0.86383877    | 0.93385816    | 4.3904349      | 3.48726071     | 4.92938572     | 8.35E-05  | 1.27644  | up        | hypothetical protein MIMGU_mgv1a00828/mg [Erythranthe guttata]                                             |
| c47543.graph_c0 | 100.473274    | 97.2032702    | 92.0327537    | 454.744305     | 526.633364     | 470.854665     | 3.3E-35   | 1.23578  | up        | PREDICTED: mediator of RNA polymerase II transcription subunit 33A-like [Sesamum indicum]                  |
| c47547.graph_c0 | 4.81950626    | 3.17027549    | 5.83935599    | 0              | 0              | 0              | 5.563E-18 | -Inf     | down      | PREDICTED: uncharacterized protein LOC101507298 [Cicer arietinum]                                          |
| c47550.graph_c0 | 15.6573649    | 18.6497067    | 20.7442202    | 0.97036053     | 1.03544359     | 1.43964776     | 2.657E-44 | -5.09001 | down      | PREDICTED: uncharacterized protein LOC105155796 [Sesamum indicum]                                          |
| c47550.graph_c2 | 5.16204908    | 4.92827159    | 6.32668889    | 0.91082888     | 0.80281229     | 0.86710041     | 1.295E-30 | -3.76269 | down      | PREDICTED: chloride channel protein CLC-a-like [Sesamum indicum]                                           |
| c47550.graph_c6 | 8.5943049     | 8.39807959    | 10.6934182    | 1.33849099     | 0.80568791     | 1.01129418     | 3.152E-34 | -4.22669 | down      | PREDICTED: chloride channel protein CLC-b-like [Sesamum indicum]                                           |
| c47550.graph_c7 | 0.92628527    | 0.52983589    | 0.680179      | 6.9245362      | 8.24943973     | 8.00468374     | 1.536E-07 | 2.35215  | up        | hypothetical protein MIMGU_mgv1a002946mg [Erythranthe guttata]                                             |
| c47552.graph_c0 | 2.20099348    | 1.62340864    | 1.83595543    | 9.65414502     | 8.5647508      | 8.79371554     | 5.754E-08 | 1.16575  | up        | PREDICTED: polyipolyglutamate synthase isoform X1 [Vitis vinifera]                                         |
| c47554.graph_c2 | 2.22533938    | 2.57027045    | 2.6396762     | 13.9342115     | 13.367617      | 14.9233912     | 5.974E-05 | 1.41374  | up        | -                                                                                                          |
| c47554.graph_c4 | 17.1231238    | 17.733467     | 15.9117397    | 12.2863084     | 12.3214345     | 13.1700654     | 7.53E-49  | -1.51555 | down      | PREDICTED: zinc finger protein JACKDAW [Sesamum indicum]                                                   |
| c47554.graph_c5 | 394.290269    | 392.242733    | 369.627339    | 280.341585     | 315.708882     | 304.515536     | 3.958E-66 | -1.45015 | down      | hypothetical protein POPTR_0003s102801g, partial [Populus trichocarpa]                                     |
| c47555.graph_c0 | 0             | 0             | 0             | 0.42449342     | 0.42160553     | 0.51957474     | 7.62E-12  | Inf      | up        | PREDICTED: kinesin-4 [Sesamum indicum]                                                                     |



| #ID             | 0 h-1<br>FPKM | 0 h-2<br>FPKM | 0 h-3<br>FPKM | 28 h-1<br>FPKM | 28 h-2<br>FPKM | 28 h-3<br>FPKM | FDR       | log2FC   | regulated | nr_annotation                                                                                             |
|-----------------|---------------|---------------|---------------|----------------|----------------|----------------|-----------|----------|-----------|-----------------------------------------------------------------------------------------------------------|
| c47556.graph_c0 | 55.1822147    | 28.1452627    | 38.8353215    | 0              | 0              | 0              | 6.185E-31 | -Inf     | down      | mannose-binding lectin precursor [Dendrobium catenatum]                                                   |
| c47557.graph_c0 | 37.320859     | 36.4957381    | 31.3503644    | 174.932104     | 169.885822     | 172.745952     | 6.225E-52 | 1.21075  | up        | PREDICTED: pentatricopeptide repeat-containing protein At5g16860 [Sesamum indicum]                        |
| c47558.graph_c0 | 104.06505     | 91.3569944    | 109.651955    | 459.330883     | 472.797736     | 427.450902     | 1.392E-34 | 1.06384  | up        | PREDICTED: NADH dehydrogenase [ubiquinone] 1 beta subcomplex subunit 2-like [Fragaria vesca subsp. vesca] |
| c47560.graph_c0 | 35.6117574    | 33.2993837    | 33.3399583    | 7.82671982     | 8.25625458     | 8.45215288     | 1.62E-226 | -3.14886 | down      | PREDICTED: CBL-interacting serine/threonine-protein kinase 24 [Sesamum indicum]                           |
| c47563.graph_c2 | 1.28905493    | 1.34195955    | 1.25892983    | 1.12425323     | 0.57522065     | 0.64216702     | 1.516E-06 | -1.82299 | down      | -                                                                                                         |
| c47564.graph_c3 | 63.1922398    | 59.5292584    | 52.3862557    | 57.9375999     | 55.0529519     | 57.8303842     | 9.033E-33 | -1.12385 | down      | PREDICTED: uncharacterized protein LOC105179697 [Sesamum indicum]                                         |
| c47564.graph_c8 | 0.92208555    | 0.57688055    | 1.03680189    | 9.63364295     | 8.16881605     | 10.3218006     | 2.544E-09 | 2.37862  | up        | PREDICTED: probable transcription factor KAN2 isoform X2 [Sesamum indicum]                                |
| c47564.graph_c9 | 3.18029712    | 1.91008903    | 1.86825496    | 2.245381       | 1.66959761     | 2.74831884     | 0.0079981 | -1.1452  | down      | -                                                                                                         |
| c47568.graph_c0 | 1.42892391    | 1.04296702    | 0.68858393    | 8.11354426     | 8.94720679     | 8.35076563     | 3.135E-18 | 1.92488  | up        | PREDICTED: D-2-hydroxyglutarate dehydrogenase, mitochondrial isoform X1 [Sesamum indicum]                 |
| c47574.graph_c1 | 947.355017    | 933.596707    | 956.402819    | 88.9852365     | 87.2550234     | 93.9879714     | 0         | -4.48269 | down      | PREDICTED: NAC domain-containing protein 2 [Sesamum indicum]                                              |
| c47575.graph_c0 | 0.01750384    | 0.07008547    | 0.11246563    | 4.6815818      | 5.01959744     | 3.42566231     | 2.306E-26 | 4.92715  | up        | PREDICTED: uncharacterized protein At5g05190 [Sesamum indicum]                                            |
| c47580.graph_c0 | 40.5618678    | 39.8265258    | 38.6409666    | 16.5612829     | 15.2608691     | 16.3577718     | 1.76E-181 | -2.39456 | down      | PREDICTED: two-component response regulator ARR2-like isoform X1 [Sesamum indicum]                        |
| c47580.graph_c1 | 388.161765    | 366.175821    | 396.904401    | 208.645352     | 200.332427     | 213.11291      | 2.635E-92 | -1.97878 | down      | PREDICTED: probable copper-transporting ATPase HMA5 [Nicotiana tomentosiformis]                           |
| c47585.graph_c0 | 26.8630866    | 22.8110219    | 21.9461309    | 110.522458     | 97.3898829     | 98.4358734     | 1.604E-20 | 1.0083   | up        | PREDICTED: uncharacterized protein LOC105167876 [Sesamum indicum]                                         |
| c47585.graph_c2 | 217.199107    | 229.446516    | 276.854933    | 201.404187     | 186.799722     | 190.356228     | 3.055E-09 | -1.41626 | down      | unnamed protein product [Triticum aestivum]                                                               |
| c47586.graph_c0 | 0             | 0             | 0             | 6.05538369     | 7.87475104     | 10.9147651     | 5.375E-15 | Inf      | up        | 60S ribosomal protein L8 [Rozella allomyces CSF55]                                                        |
| c47591.graph_c0 | 3.65889165    | 2.95934483    | 3.27246716    | 16.0406645     | 16.4616926     | 16.0401636     | 9.53E-18  | 1.20541  | up        | PREDICTED: uncharacterized protein LOC100250241 isoform X4 [Vitis vinifera]                               |
| c47593.graph_c0 | 1.28051448    | 1.6022459     | 1.09700787    | 10.5863775     | 11.5892512     | 9.20796223     | 5.511E-13 | 1.89032  | up        | PREDICTED: beta-galactosidase-like [Sesamum indicum]                                                      |
| c47593.graph_c2 | 4.35404072    | 4.03264388    | 4.29727882    | 36.5547727     | 34.434152      | 32.8365252     | 1.1E-110  | 1.94217  | up        | PREDICTED: pentatricopeptide repeat-containing protein At3g09060 [Sesamum indicum]                        |
| c47594.graph_c0 | 0.02661866    | 0             | 0.13682415    | 1.35424041     | 0.94326592     | 1.16819478     | 4.953E-10 | 3.28789  | up        | PREDICTED: uncharacterized protein LOC104815505 isoform X1 [Tarenaya hassleriana]                         |
| c47596.graph_c5 | 0.42355031    | 0.35613852    | 0.37010967    | 4.33430167     | 4.83624601     | 4.01903951     | 1.889E-23 | 2.43002  | up        | PREDICTED: probably inactive leucine-rich repeat receptor-like protein kinase At3g28040 [Sesamum indicum] |
| c47598.graph_c0 | 211.556645    | 225.315966    | 237.99075     | 37.7924073     | 46.1725226     | 37.6912503     | 4.22E-104 | -3.56442 | down      | PREDICTED: B2 protein [Sesamum indicum]                                                                   |

| #ID             | 0 h-1<br>FPKM | 0 h-2<br>FPKM | 0 h-3<br>FPKM | 28 h-1<br>FPKM | 28 h-2<br>FPKM | 28 h-3<br>FPKM | FDR       | log2FC   | regulated | nr_annotation                                                                                            |
|-----------------|---------------|---------------|---------------|----------------|----------------|----------------|-----------|----------|-----------|----------------------------------------------------------------------------------------------------------|
| c47598.graph_c1 | 162.165233    | 168.562163    | 161.354457    | 101.20407      | 96.8716        | 98.6199244     | 3.005E-91 | -1.82026 | down      | transferase, transferring glycosyl groups, putative [Ricinus communis]                                   |
| c47601.graph_c0 | 12.819353     | 12.8195347    | 11.5346125    | 11.834652      | 11.1999491     | 11.7788157     | 2.494E-42 | -1.18363 | down      | PREDICTED: LOW QUALITY PROTEIN: mediator of RNA polymerase II transcription subunit 16 [Sesamum indicum] |
| c47604.graph_c0 | 0             | 0             | 0.11054       | 2.18817718     | 5.08041986     | 5.15254303     | 1.763E-06 | 5.68304  | up        | large subunit ribosomal protein L19e, cytoplasmic [Guillardia theta CCMP2712]                            |
| c47605.graph_c0 | 8.30276232    | 7.17540126    | 8.18427466    | 35.5692262     | 37.3103615     | 37.220705      | 9.264E-32 | 1.12744  | up        | PREDICTED: arginine--tRNA ligase, cytoplasmic-like isoform X1 [Sesamum indicum]                          |
| c47606.graph_c1 | 0.03360826    | 0.13456765    | 0.04318794    | 34.8807416     | 29.4429569     | 29.3194614     | 1.98E-115 | 7.70288  | up        | PREDICTED: serine carboxypeptidase-like 27 [Sesamum indicum]                                             |
| c47610.graph_c0 | 0.08159668    | 0.5717487     | 0.10485496    | 39.7485034     | 59.3489903     | 43.2983631     | 9.993E-40 | 6.46606  | up        | PREDICTED: uncharacterized protein LOC105174809 [Sesamum indicum]                                        |
| c47615.graph_c0 | 0.42646644    | 0.18973044    | 0.24356723    | 2.68626239     | 2.23887053     | 2.64160267     | 4.336E-06 | 2.05373  | up        | PREDICTED: vinorine synthase-like [Sesamum indicum]                                                      |
| c47616.graph_c0 | 1.35021542    | 1.19440845    | 1.0087676     | 6.7551935      | 7.89200791     | 7.18818424     | 2.204E-11 | 1.53209  | up        | PREDICTED: UPF0505 protein isoform X2 [Sesamum indicum]                                                  |
| c47617.graph_c1 | 0.2719415     | 0             | 0.06989112    | 12.2935512     | 11.7423634     | 12.3215726     | 5.807E-44 | 5.65923  | up        | PREDICTED: transcription factor UNE12-like [Sesamum indicum]                                             |
| c47617.graph_c3 | 5.23907807    | 3.74594586    | 4.56842972    | 0.13599042     | 1.10507939     | 0.33290122     | 4.731E-19 | -4.20003 | down      | -                                                                                                        |
| c47618.graph_c0 | 4.49150342    | 1.38847089    | 1.78245521    | 0.09601173     | 0.04334479     | 0.03917239     | 4.392E-05 | -6.50513 | down      | HSP70 [Dendrobium catenatum]                                                                             |
| c47622.graph_c0 | 11.8354658    | 14.8091466    | 11.5588721    | 2.23650657     | 2.1746908      | 3.6499422      | 9.636E-36 | -3.33162 | down      | -                                                                                                        |
| c47622.graph_c1 | 2339.59651    | 2200.16903    | 2471.13004    | 710.668904     | 800.90527      | 884.331202     | 9.125E-76 | -2.63984 | down      | PREDICTED: probable glycosyltransferase At5g03795 [Sesamum indicum]                                      |
| c47626.graph_c0 | 1.64031481    | 2.12846322    | 2.10786948    | 9.28716203     | 7.7741369      | 8.86330792     | 1.075E-10 | 1.04859  | up        | PREDICTED: serine/threonine-protein kinase HT1-like [Sesamum indicum]                                    |
| c47628.graph_c0 | 2.56348723    | 1.65271286    | 2.40084493    | 15.0629141     | 14.1136218     | 15.4606477     | 1.212E-18 | 1.66355  | up        | -                                                                                                        |
| c47631.graph_c0 | 2.54274883    | 1.05536622    | 0.9563511     | 0.40567065     | 0.30523547     | 0.64365766     | 0.0070706 | -2.8256  | down      | hypothetical protein EUGRSUZ_H03284 [Eucalyptus grandis]                                                 |
| c47633.graph_c0 | 205.02863     | 213.141217    | 183.744597    | 114.888861     | 108.276959     | 113.435004     | 4.144E-98 | -1.9274  | down      | -                                                                                                        |
| c47636.graph_c1 | 2.8935163     | 2.70954831    | 3.718283      | 14.7209368     | 14.3941568     | 13.3960541     | 1.75E-05  | 1.09458  | up        | PREDICTED: chlorophyll synthase, chloroplastic [Sesamum indicum]                                         |
| c47637.graph_c0 | 3.68997875    | 3.56175678    | 2.54023327    | 1.05358601     | 1.55665535     | 1.87574744     | 1.367E-08 | -2.21059 | down      | hypothetical protein VITISV_006175 [Vitis vinifera]                                                      |
| c47647.graph_c0 | 18.3206339    | 19.3931524    | 17.84955      | 13.4868864     | 12.9161399     | 12.5235176     | 1.326E-73 | -1.60363 | down      | zeaxanthin epoxidase [Scutellaria baicalensis]                                                           |
| c47647.graph_c1 | 12.3028679    | 15.8636311    | 17.149475     | 5.0012638      | 2.59993254     | 2.5969939      | 1.507E-18 | -3.24691 | down      | zeaxanthin epoxidase [Scutellaria baicalensis]                                                           |
| c47648.graph_c1 | 6.96330141    | 6.86739183    | 6.04245607    | 150.351306     | 169.999141     | 143.745092     | 1.42E-114 | 3.45617  | up        | PREDICTED: ATP-citrate synthase beta chain protein 2 [Sesamum indicum]                                   |
| c47650.graph_c0 | 8.6783183     | 8.56881773    | 9.7485018     | 9.22503823     | 9.95647237     | 9.50572752     | 2.518E-14 | -1.00461 | down      | PREDICTED: uncharacterized protein LOC105179099 isoform X1 [Sesamum indicum]                             |
| c47652.graph_c0 | 18.1838584    | 17.5773468    | 16.1126431    | 13.0715998     | 15.1160448     | 13.7282588     | 9.263E-46 | -1.39682 | down      | PREDICTED: E3 ubiquitin-protein ligase SDIK1 [Sesamum indicum]                                           |
| c47652.graph_c1 | 2.82717454    | 2.83000552    | 2.69113423    | 43.416617      | 41.1938301     | 38.7499131     | 9.89E-79  | 2.79499  | up        | PREDICTED: auxin-responsive protein IAA9-like [Sesamum indicum]                                          |

| #ID             | 0 h-1<br>FPKM | 0 h-2<br>FPKM | 0 h-3<br>FPKM | 28 h-1<br>FPKM | 28 h-2<br>FPKM | 28 h-3<br>FPKM | FDR       | log2FC   | regulated | nr_annotation                                                                                                  |
|-----------------|---------------|---------------|---------------|----------------|----------------|----------------|-----------|----------|-----------|----------------------------------------------------------------------------------------------------------------|
| c47652.graph_c5 | 0.34374291    | 2.06452271    | 0.44172325    | 19.4867687     | 24.1363536     | 22.8322685     | 1.118E-11 | 3.45681  | up        | AUX/IAA8A [Malus domestica]                                                                                    |
| c47653.graph_c0 | 20.9158782    | 19.7252007    | 19.660563     | 20.5150409     | 18.1101206     | 21.1045932     | 1.481E-23 | -1.10309 | down      | PREDICTED: protein TIFY 10B-like [Sesamum indicum]                                                             |
| c47657.graph_c0 | 3.12529107    | 3.24547033    | 3.29212785    | 18.7973542     | 17.4256788     | 17.1541408     | 7.652E-48 | 1.37437  | up        | PREDICTED: uncharacterized protein LOC105164082 isoform X2 [Sesamum indicum]                                   |
| c47660.graph_c0 | 0.19599722    | 0.13079566    | 0.16790946    | 21.0350654     | 17.3635219     | 18.8563467     | 4.16E-101 | 5.76535  | up        | PREDICTED: beta-galactosidase-like [Sesamum indicum]                                                           |
| c47663.graph_c2 | 43.9531541    | 43.9558547    | 45.1322003    | 8.24868287     | 9.66858198     | 8.81130484     | 0         | -3.40655 | down      | PREDICTED: zinc finger protein ZAT10-like [Sesamum indicum]                                                    |
| c47664.graph_c0 | 5.37810993    | 5.99008632    | 6.18104009    | 1.34880413     | 1.36696738     | 1.05569017     | 6.138E-55 | -3.31146 | down      | PREDICTED: cytochrome P450 704C1-like [Sesamum indicum]                                                        |
| c47666.graph_c1 | 83.3886171    | 80.5056232    | 75.5573016    | 65.3494732     | 65.0869533     | 65.945299      | 1.261E-65 | -1.37536 | down      | acetyl-CoA carboxylase beta subunit (chloroplast) [Andrographis paniculata]                                    |
| c47671.graph_c2 | 16.5305629    | 14.6853915    | 14.8928859    | 15.6256745     | 15.5020654     | 16.0018217     | 2.608E-35 | -1.05775 | down      | PREDICTED: pentatricopeptide repeat-containing protein At1g77360, mitochondrial-like [Sesamum indicum]         |
| c47676.graph_c1 | 83.2216796    | 79.775591     | 89.024426     | 28.3688603     | 29.7071474     | 30.9981103     | 1.009E-77 | -2.59179 | down      | PREDICTED: B11-like protein-like [Solanum tuberosum]                                                           |
| c47677.graph_c0 | 17.8458459    | 20.1039538    | 19.4964608    | 17.0049799     | 21.552683      | 19.7020894     | 1.076E-16 | -1.07118 | down      | UDP-galactose/UDP-glucose transporter 4 [Morus notabilis]                                                      |
| c47678.graph_c2 | 38.7139371    | 41.7304083    | 38.3629327    | 17.5123125     | 15.4633877     | 17.5536474     | 1.3E-167  | -2.32322 | down      | hypothetical protein MIMGU_mgv1a024577mg, partial [Erythranthe guttata]                                        |
| c47679.graph_c0 | 0.32395783    | 0.59867487    | 0.28820675    | 6.68317702     | 5.85439849     | 6.94608781     | 6.555E-29 | 2.92145  | up        | PREDICTED: outer envelope protein 80, chloroplastic isoform X1 [Sesamum indicum]                               |
| c47680.graph_c0 | 2.0719942     | 1.58024304    | 1.85958986    | 10.6370076     | 11.3452104     | 9.85000954     | 3.022E-35 | 1.43952  | up        | PREDICTED: pentatricopeptide repeat-containing protein At5g21222-like [Sesamum indicum]                        |
| c47682.graph_c0 | 9.26123854    | 8.96854118    | 10.5830257    | 66.7400946     | 61.6061988     | 66.8218643     | 1.954E-67 | 1.66772  | up        | PREDICTED: probable tRNA N6-adenosine threonylcarbamoyltransferase, mitochondrial isoform X1 [Sesamum indicum] |
| c47683.graph_c0 | 14.407761     | 15.9974272    | 15.8631889    | 12.1997798     | 12.7363913     | 12.9206575     | 2.491E-35 | -1.38085 | down      | alpha-expansin 3 [Striga asiatica]                                                                             |
| c47689.graph_c0 | 0.98137459    | 0.80139674    | 0.49780469    | 47.7694757     | 45.8260084     | 46.3006031     | 4.72E-269 | 4.85609  | up        | PREDICTED: major facilitator superfamily domain-containing protein 12-like [Sesamum indicum]                   |
| c47692.graph_c0 | 167.922715    | 159.836402    | 176.772216    | 119.593459     | 120.52625      | 122.299025     | 1.591E-47 | -1.5686  | down      | hypothetical protein MIMGU_mgv1a020592mg, partial [Erythranthe guttata]                                        |
| c47694.graph_c0 | 28.3421579    | 28.2006548    | 28.8603904    | 24.4500785     | 25.1326328     | 25.2966971     | 5.168E-53 | -1.28046 | down      | PREDICTED: truncated FRIGIDA-like protein 1 [Sesamum indicum]                                                  |
| c47695.graph_c0 | 183.845786    | 162.403378    | 185.7542      | 61.1749455     | 54.8844091     | 54.7580794     | 8.062E-72 | -2.73021 | down      | hypothetical protein VITISV_032357 [Vitis vinifera]                                                            |
| c47702.graph_c1 | 109.090209    | 108.07668     | 101.749072    | 101.960883     | 104.437709     | 113.749164     | 1.856E-41 | -1.08364 | down      | -                                                                                                              |
| c47705.graph_c0 | 0.70409477    | 0             | 7.23831726    | 36.3329736     | 41.1220973     | 38.6251465     | 1.32E-10  | 2.74528  | up        | -                                                                                                              |
| c47705.graph_c1 | 0.38095805    | 0.10895415    | 0.27974067    | 2.63034206     | 2.71423116     | 2.19475127     | 4.386E-09 | 2.20282  | up        | hypothetical protein MIMGU_mgv1a003510mg [Erythranthe guttata]                                                 |
| c47706.graph_c0 | 0.5169776     | 0.66535107    | 0.28471572    | 3.27427381     | 2.32631784     | 2.73748022     | 0.0002173 | 1.42373  | up        | PREDICTED: pentatricopeptide repeat-containing protein At3g09040, mitochondrial [Sesamum indicum]              |

| #ID             | 0 h-1<br>FPKM | 0 h-2<br>FPKM | 0 h-3<br>FPKM | 28 h-1<br>FPKM | 28 h-2<br>FPKM | 28 h-3<br>FPKM | FDR       | log2FC   | regulated | nr_annotation                                                                              |
|-----------------|---------------|---------------|---------------|----------------|----------------|----------------|-----------|----------|-----------|--------------------------------------------------------------------------------------------|
| c47714.graph_c2 | 2.32424863    | 2.57147875    | 2.82955406    | 0.44453961     | 0.64220414     | 1.01567393     | 9.607E-12 | -2.96745 | down      | hypothetical protein MIMGU_mgv1a022738mg [Erythranthe guttata]                             |
| c47718.graph_c0 | 0.48949962    | 0.3392237     | 0.43547981    | 4.07762003     | 5.68317431     | 5.02445332     | 2.025E-13 | 2.45782  | up        | hypothetical protein MIMGU_mgv1a004721mg [Erythranthe guttata]                             |
| c47719.graph_c0 | 22.4539097    | 22.0858774    | 22.5875735    | 22.5415266     | 21.7325006     | 23.3938064     | 3.157E-35 | -1.07881 | down      | PREDICTED: arginine/serine-rich coiled-coil protein 2 [Sesamum indicum]                    |
| c47721.graph_c0 | 35.3616898    | 34.0522631    | 43.6170097    | 13.2280163     | 12.1266393     | 14.822894      | 2.597E-18 | -2.585   | down      | PREDICTED: 17.4 kDa class III heat shock protein [Sesamum indicum]                         |
| c47722.graph_c0 | 19.8341018    | 17.4742069    | 17.8936961    | 165.2824       | 170.808437     | 149.451709     | 6.338E-91 | 2.04671  | up        | Heterogeneous nuclear ribonucleoprotein F [Gossypium arboreum]                             |
| c47726.graph_c0 | 84.864226     | 74.369074     | 77.2739779    | 23.71689       | 23.4343288     | 30.5506285     | 1.62E-127 | -2.69421 | down      | PREDICTED: E3 ubiquitin-protein ligase At4g11680-like [Sesamum indicum]                    |
| c47726.graph_c1 | 37.2192574    | 37.5429686    | 37.2868896    | 17.7334181     | 16.7752639     | 18.2038717     | 2.77E-149 | -2.17815 | down      | PREDICTED: LOW QUALITY PROTEIN: uncharacterized protein LOC105174988 [Sesamum indicum]     |
| c47730.graph_c0 | 1.108891      | 0.59200074    | 0.56998753    | 3.81476178     | 3.54139678     | 3.81429377     | 0.0040619 | 1.21559  | up        | hypothetical protein MIMGU_mgv1a012555mg [Erythranthe guttata]                             |
| c47731.graph_c0 | 10.7384266    | 8.73211257    | 9.11212904    | 6.52548349     | 6.27688186     | 6.79207051     | 8.438E-29 | -1.63326 | down      | hypothetical protein MIMGU_mgv1a003250mg [Erythranthe guttata]                             |
| c47747.graph_c3 | 9.61239059    | 7.95131221    | 7.46698671    | 69.4804169     | 66.2837695     | 70.0398723     | 3.114E-96 | 1.952    | up        | PREDICTED: ultraviolet-B receptor UVR8 [Sesamum indicum]                                   |
| c47749.graph_c0 | 1.80626656    | 1.90045867    | 1.98227382    | 14.718514      | 15.8504236     | 13.6131094     | 1.808E-59 | 1.86495  | up        | PREDICTED: importin-11 [Sesamum indicum]                                                   |
| c47753.graph_c0 | 173.504354    | 165.705319    | 160.335146    | 46.4082702     | 44.6928516     | 46.6154144     | 0         | -2.9484  | down      | PREDICTED: transcription factor PIF1 [Sesamum indicum]                                     |
| c47755.graph_c0 | 2.67213774    | 1.83415781    | 1.76595572    | 0              | 0.20040332     | 0.04527809     | 7.832E-24 | -5.7655  | down      | --                                                                                         |
| c47757.graph_c0 | 35.521868     | 32.9087715    | 36.1915554    | 18.2300261     | 16.1745707     | 19.0673627     | 5.514E-77 | -2.05876 | down      | PREDICTED: uncharacterized protein LOC105172510 isoform X1 [Sesamum indicum]               |
| c47763.graph_c2 | 212.122713    | 218.481498    | 219.793375    | 90.3578115     | 88.9579885     | 94.0598842     | 8.36E-166 | -2.34113 | down      | PREDICTED: uncharacterized protein LOC105161925 [Sesamum indicum]                          |
| c47763.graph_c3 | 0.03476091    | 0.10438716    | 0             | 1.46531372     | 1.30022985     | 1.42245169     | 2.65E-10  | 3.8358   | up        | PREDICTED: U-box domain-containing protein 5 [Sesamum indicum]                             |
| c47764.graph_c2 | 54.2831268    | 54.9711564    | 43.6229007    | 278.670382     | 311.96561      | 259.010932     | 5.824E-25 | 1.38606  | up        | PREDICTED: arginine decarboxylase [Sesamum indicum]                                        |
| c47770.graph_c0 | 11.1935456    | 11.3458721    | 8.65947527    | 8.79115494     | 10.0653805     | 9.63156673     | 2.152E-12 | -1.21839 | down      | PREDICTED: probable serine/threonine-protein kinase At1g18390 isoform X1 [Sesamum indicum] |
| c47776.graph_c0 | 9.66083816    | 10.066574     | 9.4486238     | 5.82324329     | 5.04147058     | 5.70988452     | 9.427E-45 | -1.90557 | down      | GTPase-activating protein gyp7 [Glycine soja]                                              |
| c47778.graph_c0 | 11.617805     | 10.8454314    | 11.5744317    | 5.57856987     | 4.91699875     | 5.18687958     | 3.359E-77 | -2.20862 | down      | PREDICTED: CBS domain-containing protein CBSCBSPB1-like isoform X3 [Sesamum indicum]       |
| c47782.graph_c0 | 0             | 0             | 0             | 2.25840422     | 1.06389248     | 1.94967067     | 6.936E-08 | Inf      | up        | squalene epoxidase [Chlorophytum borivillianum]                                            |
| c47784.graph_c0 | 5.72459622    | 5.13899242    | 4.71745174    | 23.1542187     | 22.1982971     | 23.1645366     | 7.377E-29 | 1.04853  | up        | PREDICTED: uncharacterized protein LOC105163660 [Sesamum indicum]                          |
| c47792.graph_c1 | 4.07483999    | 3.97379352    | 3.18498467    | 16.135978      | 15.8098001     | 15.8824063     | 1.925E-16 | 1.00259  | up        | PREDICTED: cleavage stimulation factor subunit 7 [Sesamum indicum]                         |
| c47795.graph_c0 | 0             | 0             | 0             | 6.06291411     | 8.05301861     | 10.1398969     | 2.075E-17 | Inf      | up        | unnamed protein product [Vitis vinifera]                                                   |
| c47796.graph_c0 | 15.0616242    | 14.4145535    | 15.1699654    | 14.8298222     | 13.389939      | 14.9980146     | 6.151E-19 | -1.1373  | down      | PREDICTED: uncharacterized protein LOC105157941 [Sesamum indicum]                          |

| #ID             | 0 h-1<br>FPKM | 0 h-2<br>FPKM | 0 h-3<br>FPKM | 28 h-1<br>FPKM | 28 h-2<br>FPKM | 28 h-3<br>FPKM | FDR       | log2FC   | regulated | nr_annotation                                                                                          |
|-----------------|---------------|---------------|---------------|----------------|----------------|----------------|-----------|----------|-----------|--------------------------------------------------------------------------------------------------------|
| c47801.graph_c0 | 2.08557046    | 1.82001027    | 1.58053677    | 10.5197764     | 9.88438932     | 9.9689171      | 1.041E-21 | 1.38161  | up        | PREDICTED: uncharacterized protein LOC105174380 isoform X3 [Sesamum indicum]                           |
| c47804.graph_c0 | 9.08082723    | 8.67799038    | 8.24954099    | 7.41740228     | 6.35515656     | 6.45929639     | 5.687E-31 | -1.45191 | down      | PREDICTED: MORC family CW-type zinc finger protein 3 isoform X1 [Sesamum indicum]                      |
| c47809.graph_c1 | 2.74325731    | 2.70501913    | 2.36766778    | 11.2187525     | 12.9506901     | 11.388378      | 1.158E-08 | 1.0966   | up        | PREDICTED: probable E3 ubiquitin-protein ligase LUL4 [Sesamum indicum]                                 |
| c47810.graph_c1 | 3.04350875    | 3.04655637    | 2.3806265     | 0              | 0.08683621     | 0.07847729     | 4.758E-26 | -6.76498 | down      | -                                                                                                      |
| c47810.graph_c2 | 325.27905     | 329.012967    | 313.966124    | 207.400886     | 193.328125     | 203.005588     | 6.182E-90 | -1.7714  | down      | PREDICTED: E3 ubiquitin-protein ligase RKP [Sesamum indicum]                                           |
| c47810.graph_c3 | 23.8975471    | 23.0594417    | 26.8360499    | 0.86060628     | 0.49448432     | 0.7022477      | 8.39E-118 | -6.25623 | down      | -                                                                                                      |
| c47816.graph_c0 | 2.89179242    | 3.09998514    | 2.29289287    | 14.7866962     | 15.0602513     | 13.5253987     | 1.675E-23 | 1.30036  | up        | PREDICTED: malonate--CoA ligase isoform X2 [Sesamum indicum]                                           |
| c47820.graph_c0 | 0             | 0             | 0             | 2.47116597     | 2.77448746     | 5.34797941     | 1.274E-08 | Inf      | up        | predicted protein [Hordeum vulgare subsp. vulgare]                                                     |
| c47823.graph_c0 | 21.4256518    | 24.1513067    | 20.0510687    | 20.4806181     | 19.6535638     | 18.811378      | 6.983E-26 | -1.24454 | down      | hypothetical protein MIMGU_mgv1a0118/bmg [Erythranthe outtata]                                         |
| c47828.graph_c0 | 12.2428195    | 12.4663733    | 11.4603181    | 5.06266122     | 3.91314584     | 5.50812029     | 1.702E-50 | -2.40872 | down      | -                                                                                                      |
| c47831.graph_c0 | 241.94522     | 245.600643    | 229.973898    | 243.923466     | 237.11763      | 243.527353     | 2.653E-39 | -1.07565 | down      | PREDICTED: uncharacterized protein LOC100254102 [Vitis vinifera]                                       |
| c47832.graph_c0 | 0.17811172    | 0.05348702    | 0.04577612    | 3.23626431     | 2.65321527     | 2.60907607     | 1.243E-24 | 3.86164  | up        | hypothetical protein MIMGU_mgv1a000209/mg [Erythranthe outtata]                                        |
| c47833.graph_c0 | 12.0750729    | 11.6972557    | 10.8739449    | 10.4942162     | 9.97770424     | 9.78992219     | 9.997E-47 | -1.28462 | down      | PREDICTED: uncharacterized protein LOC105171928 isoform X1 [Sesamum indicum]                           |
| c47836.graph_c0 | 2.57795022    | 1.34187646    | 1.59012869    | 10.1925981     | 8.5262722      | 7.09397731     | 0.0011843 | 1.14156  | up        | -                                                                                                      |
| c47836.graph_c1 | 50.9098757    | 50.9400709    | 53.6283132    | 28.3845387     | 29.3481952     | 28.2469962     | 3.46E-106 | -1.94603 | down      | PREDICTED: uncharacterized protein LOC105173629 [Sesamum indicum]                                      |
| c47840.graph_c3 | 8.34547202    | 12.8401442    | 4.76633865    | 107.605416     | 141.274049     | 112.91851      | 9.719E-21 | 2.7171   | up        | -                                                                                                      |
| c47843.graph_c3 | 0.18382992    | 0.061338      | 0.11811436    | 0.73483591     | 0.80422779     | 0.65413102     | 0.0011919 | 1.50676  | up        | PREDICTED: serine/threonine-protein kinase STN7, chloroplastic [Sesamum indicum]                       |
| c47846.graph_c0 | 5.50867929    | 4.54466653    | 5.60086495    | 70.7462811     | 63.4005628     | 63.6879103     | 2.461E-93 | 2.5682   | up        | hypothetical protein MIMGU_mgv1a012852/mg [Erythranthe outtata]                                        |
| c47848.graph_c3 | 4.12744426    | 3.68249279    | 3.68968994    | 3.32586821     | 2.35525268     | 4.31028207     | 4.853E-05 | -1.28981 | down      | -                                                                                                      |
| c47849.graph_c0 | 0             | 0             | 0             | 2.09799358     | 2.41091646     | 4.39658765     | 9.443E-07 | Inf      | up        | Eukaryotic translation initiation factor 5A [Kozella allomycis CSF551]                                 |
| c47850.graph_c0 | 22.9760556    | 23.569759     | 21.7592231    | 11.6021889     | 9.83966484     | 10.5830793     | 6.243E-72 | -2.18247 | down      | unnamed protein product [Coffea canephora]                                                             |
| c47851.graph_c0 | 122.008247    | 117.662985    | 119.289821    | 93.8647428     | 93.9815758     | 90.4839907     | 2.742E-71 | -1.45756 | down      | hypothetical protein MIMGU_mgv1a004485/mg [Erythranthe outtata]                                        |
| c47851.graph_c1 | 170.694755    | 170.459897    | 163.089613    | 62.2339535     | 66.2592258     | 61.9892926     | 1.54E-194 | -2.49464 | down      | PREDICTED: NADH dehydrogenase [ubiquinone] iron-sulfur protein 7, mitochondrial-like [Sesamum indicum] |
| c47853.graph_c3 | 96.7143345    | 106.93826     | 94.7916698    | 99.0286045     | 100.681601     | 102.714571     | 2.001E-37 | -1.07075 | down      | PREDICTED: probable indole-3-acetic acid-amido synthetase GH3.1 [Sesamum indicum]                      |
| c47861.graph_c0 | 0.77935794    | 0.78013835    | 0.70694527    | 7.95227304     | 7.11998805     | 7.92998063     | 2.319E-39 | 2.25436  | up        | PREDICTED: uncharacterized protein LOC105167319 isoform X5 [Sesamum indicum]                           |

| #ID             | 0 h-1<br>FPKM | 0 h-2<br>FPKM | 0 h-3<br>FPKM | 28 h-1<br>FPKM | 28 h-2<br>FPKM | 28 h-3<br>FPKM | FDR       | log2FC   | regulated | nr_annotation                                                                                  |
|-----------------|---------------|---------------|---------------|----------------|----------------|----------------|-----------|----------|-----------|------------------------------------------------------------------------------------------------|
| c47863.graph_c0 | 1.06299099    | 1.50219588    | 0.7231688     | 12.7929451     | 11.407214      | 14.0916402     | 1.028E-24 | 2.45724  | up        | PREDICTED: LOW QUALITY PROTEIN: uncharacterized protein LOC105171608 [Sesamum indicum]         |
| c47863.graph_c1 | 2.01928437    | 1.69671703    | 1.74253396    | 21.681978      | 20.8438683     | 21.1538572     | 4.47E-107 | 2.45522  | up        | PREDICTED: LOW QUALITY PROTEIN: uncharacterized protein LOC105171608 [Sesamum indicum]         |
| c47865.graph_c0 | 49.8391422    | 45.7295142    | 42.6208742    | 20.5514216     | 18.772161      | 20.3010656     | 2.62E-134 | -2.30115 | down      | PREDICTED: transcription factor GTE4-like isoform X3 [Sesamum indicum]                         |
| c47865.graph_c1 | 28.0397058    | 34.1364932    | 26.7806387    | 16.6153895     | 12.4327118     | 10.7864928     | 2.948E-24 | -2.24952 | down      | PREDICTED: transcription factor GTE4-like isoform X3 [Sesamum indicum]                         |
| c47865.graph_c3 | 0.60747661    | 0.55280446    | 0.3548325     | 8.46897418     | 10.2559866     | 8.90846894     | 7.455E-21 | 3.10435  | up        | hypothetical protein MIMGU_mgv1a012548mg [Erythranthe diffusa]                                 |
| c47865.graph_c4 | 235.782617    | 232.609558    | 223.254425    | 83.9397757     | 79.8629008     | 81.0910755     | 5.37E-185 | -2.58774 | down      | PREDICTED: patellin-3-like [Sesamum indicum]                                                   |
| c47865.graph_c6 | 375.978214    | 345.168882    | 378.285883    | 90.3451128     | 95.9539705     | 102.194683     | 4.95E-147 | -3.02063 | down      | hypothetical protein VITISV_027452 [Vitis vinifera]                                            |
| c47874.graph_c1 | 22.4028717    | 23.0570035    | 22.1996422    | 20.9834991     | 19.567317      | 20.1788151     | 1.732E-43 | -1.2462  | down      | PREDICTED: dymeclin-like [Sesamum indicum]                                                     |
| c47881.graph_c1 | 23.9163023    | 23.692392     | 21.4310217    | 18.2820416     | 16.6694585     | 17.4057691     | 7.045E-73 | -1.4881  | down      | PREDICTED: uncharacterized protein LOC105166430 [Sesamum indicum]                              |
| c47886.graph_c0 | 1.35183649    | 1.46144536    | 1.70242014    | 0.98250697     | 1.08227624     | 0.91395814     | 1.376E-08 | -1.69436 | down      | PREDICTED: ferric reduction oxidase 2-like isoform X2 [Sesamum indicum]                        |
| c47889.graph_c0 | 36.6568199    | 34.6722726    | 34.8966332    | 20.5647375     | 19.2815314     | 20.2350476     | 7.24E-110 | -1.91206 | down      | PREDICTED: serine/threonine-protein kinase EDK1 [Sesamum indicum]                              |
| c47891.graph_c1 | 54.680133     | 51.1395561    | 58.0040062    | 12.623677      | 11.9256818     | 12.6216806     | 1.95E-94  | -3.23126 | down      | hypothetical protein MIMGU_mgv1a011954mg [Erythranthe diffusa]                                 |
| c47891.graph_c2 | 786.407989    | 791.290727    | 812.491392    | 607.566185     | 641.985668     | 675.78401      | 8.701E-39 | -1.40265 | down      | PREDICTED: fumarate hydratase 1, mitochondrial [Sesamum indicum]                               |
| c47894.graph_c0 | 2.97689395    | 2.88957562    | 3.12989448    | 49.2380489     | 54.0473408     | 38.144879      | 3.39E-21  | 2.88182  | up        | PREDICTED: uncharacterized protein LOC105169824 isoform X1 [Sesamum indicum]                   |
| c47896.graph_c1 | 886.559198    | 830.280553    | 912.005776    | 266.226231     | 254.54085      | 267.909758     | 5.09E-127 | -2.82787 | down      | PREDICTED: uncharacterized protein LOC105160195 [Sesamum indicum]                              |
| c47896.graph_c2 | 22.0835764    | 20.8888628    | 22.7807214    | 20.7622061     | 17.3503225     | 19.5251133     | 1.206E-17 | -1.28091 | down      | PREDICTED: cytochrome P450 CYP7A219-like [Sesamum indicum]                                     |
| c47900.graph_c0 | 109.067233    | 113.480735    | 98.9436018    | 81.5807835     | 80.2733081     | 81.6575755     | 1.185E-76 | -1.48989 | down      | PREDICTED: glycine-rich RNA-binding protein RZ1C-like isoform X1 [Sesamum indicum]             |
| c47902.graph_c0 | 5.50678276    | 5.2285758     | 5.09919499    | 85.1665465     | 82.4508127     | 79.4608287     | 1.17E-165 | 2.87392  | up        | PREDICTED: probable starch synthase 4, chloroplastic/amyloplastic isoform X3 [Sesamum indicum] |
| c47904.graph_c0 | 153.121301    | 143.562816    | 152.233291    | 150.239668     | 158.135757     | 159.665648     | 7.387E-36 | -1.03035 | down      | PREDICTED: ATP-dependent RNA helicase DHX36 isoform X1 [Sesamum indicum]                       |
| c47910.graph_c0 | 23.4819139    | 21.0411488    | 19.9951185    | 10.7812691     | 12.1784498     | 12.2602448     | 3.096E-86 | -1.96181 | down      | PREDICTED: cytochrome P450 CYP7A219-like [Sesamum indicum]                                     |
| c47911.graph_c2 | 120.574232    | 119.426922    | 129.895818    | 30.4035936     | 27.7160971     | 26.7555642     | 1.44E-125 | -3.2156  | down      | hypothetical protein MIMGU_mgv1a0080/6mg [Erythranthe diffusa]                                 |
| c47913.graph_c1 | 29.2355588    | 30.0596812    | 25.5097134    | 28.54084       | 30.7436341     | 27.9126622     | 2.123E-21 | -1.04892 | down      | PREDICTED: lysophospholipid acyltransferase LPEAT2 [Sesamum indicum]                           |
| c47914.graph_c0 | 0             | 0             | 0             | 3.60660162     | 4.55007064     | 5.52308456     | 3.042E-17 | Inf      | up        | hypothetical protein JCGZ_08960 [Jatropha curcas]                                              |

| #ID             | 0 h-1<br>FPKM | 0 h-2<br>FPKM | 0 h-3<br>FPKM | 28 h-1<br>FPKM | 28 h-2<br>FPKM | 28 h-3<br>FPKM | FDR       | log2FC   | regulated | nr_annotation                                                                                                   |
|-----------------|---------------|---------------|---------------|----------------|----------------|----------------|-----------|----------|-----------|-----------------------------------------------------------------------------------------------------------------|
| c47915.graph_c0 | 4.24654579    | 1.92614287    | 2.13163261    | 0              | 0              | 0              | 1.441E-11 | -Inf     | down      | PREDICTED: stem-specific protein TSJT1-like isoform X1 [Elaeis guineensis]                                      |
| c47919.graph_c0 | 1.3542199     | 1.06918666    | 0.90687844    | 5.33014057     | 5.87652476     | 5.667165       | 3.219E-19 | 1.25513  | up        | PREDICTED: pentatricopeptide repeat-containing protein At1g09900 [Sesamum indicum]                              |
| c47920.graph_c0 | 6.58369259    | 6.11647381    | 6.58023772    | 31.0555222     | 31.344058      | 29.5262818     | 9.268E-21 | 1.16231  | up        | indole-3-glycerol phosphate lyase IGL1 [Aphelandra squarrosa]                                                   |
| c47923.graph_c0 | 0             | 0             | 0             | 0.93612895     | 0.95089125     | 0.98667004     | 4.502E-09 | Inf      | up        | --                                                                                                              |
| c47924.graph_c0 | 22.1390296    | 22.7450864    | 20.6812748    | 15.5702269     | 17.3120826     | 15.6456091     | 6.575E-62 | -1.52403 | down      | PREDICTED: cysteine-rich receptor-like protein kinase 3 [Nicotiana sylvestris]                                  |
| c47934.graph_c0 | 14.2326956    | 13.5532759    | 11.6450493    | 5.88885638     | 5.94674        | 5.21623479     | 1.615E-51 | -2.29807 | down      | hypothetical protein MIMGU_mgv1a01059/mg [Erythranthe guttata]                                                  |
| c47937.graph_c1 | 39.199188     | 36.420621     | 38.9785371    | 12.3837103     | 11.4661521     | 12.4363653     | 1.12E-196 | -2.74951 | down      | PREDICTED: ATP-dependent DNA helicase 2 subunit KU80 isoform X2 [Sesamum indicum]                               |
| c47944.graph_c1 | 4.77697983    | 4.49263338    | 4.65392157    | 23.3019761     | 20.2813195     | 20.9643989     | 2.039E-24 | 1.12241  | up        | PREDICTED: MA1E efflux family protein D1X1 [Sesamum indicum]                                                    |
| c47946.graph_c0 | 42.6491057    | 44.1070106    | 41.161116     | 25.0032052     | 24.7306646     | 24.8130353     | 8.03E-117 | -1.86897 | down      | PREDICTED: scarecrow-like protein 1 [Sesamum indicum]                                                           |
| c47948.graph_c0 | 1.8445318     | 2.20539692    | 1.48143524    | 332.616535     | 275.507696     | 325.302865     | 9.24E-156 | 6.31192  | up        | PREDICTED: alpha-L-arabinofuranosidase 1-like isoform X2 [Sesamum indicum]                                      |
| c47950.graph_c0 | 3.96320485    | 5.18066174    | 5.2127075     | 26.7710966     | 25.9770252     | 21.7343886     | 1.371E-13 | 1.28103  | up        | unnamed protein product [Coffea canephora]                                                                      |
| c47952.graph_c0 | 1.9012037     | 1.93770942    | 2.13217922    | 14.3705525     | 14.0414106     | 12.259265      | 3.931E-21 | 1.67522  | up        | PREDICTED: ABC transporter I family member 11, chloroplastic isoform X2 [Sesamum indicum]                       |
| c47954.graph_c0 | 0             | 0             | 0             | 1.99105427     | 3.59547065     | 4.75370511     | 2.039E-06 | Inf      | up        | 40S ribosomal protein S11 [Auxenochlorella protothecoides]                                                      |
| c47956.graph_c0 | 20.4064264    | 16.8019499    | 19.0541701    | 12.5905772     | 11.9140369     | 12.0151316     | 7.517E-32 | -1.71369 | down      | hypothetical protein MIMGU_mgv1a0158002mg, partial [Erythranthe guttata]                                        |
| c47957.graph_c0 | 56.5884466    | 58.3645245    | 53.1592309    | 53.3348273     | 54.7629737     | 51.6703191     | 4.539E-43 | -1.16332 | down      | PREDICTED: nucleolar complex protein 4 homolog isoform X1 [Sesamum indicum]                                     |
| c47958.graph_c0 | 3.44671142    | 3.58159755    | 3.24805113    | 23.6190428     | 21.6058167     | 20.9666292     | 9.794E-32 | 1.59738  | up        | PREDICTED: 3-oxoacyl-[acyl-carrier-protein] synthase II, chloroplastic [Vitis vinifera]                         |
| c47958.graph_c1 | 11.1702903    | 10.6537363    | 11.009171     | 10.8725669     | 11.1575436     | 10.9238029     | 2.238E-19 | -1.08526 | down      | hypothetical protein MIMGU_mgv1a024121mg, partial [Erythranthe guttata]                                         |
| c47961.graph_c0 | 0.3050715     | 0.45806547    | 0.29402171    | 2.60525942     | 1.6516184      | 2.6460302      | 0.0001788 | 1.61962  | up        | PREDICTED: probable polygalacturonase At5g15720-like [Glycine max]                                              |
| c47963.graph_c0 | 2.90894205    | 3.95713616    | 2.87546592    | 30.2493562     | 29.8575678     | 21.0559433     | 2.817E-10 | 1.96755  | up        | PREDICTED: protein ENHANCED DISEASE RESISTANCE 2-like [Sesamum indicum]                                         |
| c47963.graph_c2 | 7.13039425    | 4.48170756    | 8.94974964    | 5.90544519     | 4.46152236     | 5.6055371      | 0.0083723 | -1.45899 | down      | -                                                                                                               |
| c47968.graph_c0 | 179.286408    | 160.616204    | 172.227328    | 69.4375954     | 67.5108205     | 76.6870706     | 5.14E-123 | -2.3511  | down      | PREDICTED: alpha-galactosidase-like [Sesamum indicum]                                                           |
| c47971.graph_c0 | 221.818253    | 214.295197    | 224.086907    | 86.4549941     | 79.9351609     | 81.761115      | 1.19E-191 | -2.50248 | down      | PREDICTED: LOW QUALITY PROTEIN: manganese-dependent ADP-ribose/CDP-alcohol diphosphatase-like [Sesamum indicum] |
| c47972.graph_c1 | 0.15624427    | 0.25024115    | 0.40156013    | 6.74531144     | 7.13620728     | 6.50486797     | 3.772E-31 | 3.55499  | up        | PREDICTED: NF-X1-type zinc finger protein NF-XL1 [Prunus mume]                                                  |

| #ID             | 0 h-1<br>FPKM | 0 h-2<br>FPKM | 0 h-3<br>FPKM | 28 h-1<br>FPKM | 28 h-2<br>FPKM | 28 h-3<br>FPKM | FDR       | log2FC   | regulated | nr_annotation                                                                                 |
|-----------------|---------------|---------------|---------------|----------------|----------------|----------------|-----------|----------|-----------|-----------------------------------------------------------------------------------------------|
| c47972.graph_c3 | 170.258586    | 168.897847    | 173.211786    | 134.964113     | 136.076933     | 140.446904     | 1.148E-64 | -1.40697 | down      | PREDICTED: putative lactoylglutathione lyase [Sesamum indicum]                                |
| c47972.graph_c5 | 0.19527785    | 0.0651578     | 0.50187954    | 10.3606576     | 12.6865142     | 10.8476419     | 6.61E-31  | 4.36595  | up        | hypothetical protein MIMGU_mgv1a026403mg, partial [Erythranthe guttata]                       |
| c47975.graph_c0 | 57.0319485    | 50.9962193    | 49.8231944    | 52.600916      | 51.4879808     | 54.5919325     | 9.569E-30 | -1.08124 | down      | hypothetical protein PRUPE_ppa009199mg [Prunus persica]                                       |
| c47976.graph_c1 | 172.240021    | 170.155899    | 181.558412    | 767.29367      | 797.600994     | 783.068792     | 6.015E-39 | 1.07257  | up        | PREDICTED: UPF0586 protein C9orf41 homolog isoform X2 [Sesamum indicum]                       |
| c47977.graph_c0 | 0             | 0             | 0             | 1.84969625     | 1.79857169     | 4.06359971     | 0.0001496 | Inf      | up        | hypothetical protein CY34DRAFT_809502 [Suillus luteus UH-Slu-Lm8-n1]                          |
| c47978.graph_c0 | 5.30333039    | 5.22482023    | 3.71237587    | 26.5144209     | 25.0939934     | 26.6016299     | 5.274E-35 | 1.37144  | up        | PREDICTED: ABC transporter D family member 1 [Sesamum indicum]                                |
| c47978.graph_c1 | 9.75787293    | 9.262421      | 8.51804431    | 5.6980277      | 5.74096155     | 6.48541555     | 3.151E-35 | -1.70781 | down      | hypothetical protein MIMGU_mgv1a010050mg [Erythranthe guttata]                                |
| c47979.graph_c0 | 8.03468871    | 7.19364792    | 6.75205619    | 55.501559      | 56.0192306     | 58.0607968     | 2.17E-92  | 1.85933  | up        | hypothetical protein MIMGU_mgv1a024150mg [Erythranthe guttata]                                |
| c47981.graph_c0 | 0.98467056    | 0.83963337    | 0.93728938    | 0.55661891     | 0.74189597     | 0.90839298     | 0.0002255 | -1.41234 | down      | hypothetical protein PHAVU_007G150900g [Phaseolus vulgaris]                                   |
| c47981.graph_c1 | 0.82393781    | 0.48348167    | 0.40161102    | 3.53105123     | 4.30687773     | 4.19559025     | 7.662E-09 | 1.7336   | up        | PREDICTED: uncharacterized protein LOC105174256 [Sesamum indicum]                             |
| c47982.graph_c0 | 119.879118    | 124.380467    | 116.865072    | 89.955118      | 84.0932942     | 82.77626       | 2.39E-49  | -1.58199 | down      | flavone synthase II [Verbena x hybrida]                                                       |
| c47982.graph_c2 | 125.566937    | 136.501197    | 132.040924    | 108.602244     | 119.543468     | 114.129943     | 1.37E-43  | -1.29448 | down      | flavone synthase II [Verbena x hybrida]                                                       |
| c47982.graph_c3 | 98.4547239    | 96.138865     | 89.1826638    | 42.1528913     | 41.0531153     | 40.9896032     | 7.47E-169 | -2.2815  | down      | PREDICTED: uncharacterized protein LOC105178089 [Sesamum indicum]                             |
| c47983.graph_c0 | 0             | 0             | 0             | 2.75419664     | 4.10859525     | 5.42307865     | 2.387E-09 | Inf      | up        | PREDICTED: 40S ribosomal protein S19-3 [Prunus mume]                                          |
| c47984.graph_c0 | 0.78341904    | 0.54291013    | 0.54208241    | 0.28469222     | 0.27682349     | 0.42887359     | 5.631E-07 | -2.00006 | down      | hypothetical protein [Beta vulgaris subsp. vulgaris]                                          |
| c47984.graph_c1 | 3.17213568    | 3.21475696    | 3.443351      | 21.4940397     | 20.16994       | 20.7406099     | 5.267E-45 | 1.57477  | up        | PREDICTED: putative nuclease HARB11 [Sesamum indicum]                                         |
| c47990.graph_c0 | 0.48098542    | 0.64195608    | 0.41205687    | 4.69987438     | 4.8748172      | 5.26132077     | 7.287E-09 | 2.18541  | up        | PREDICTED: kinetochore protein Spc25 [Sesamum indicum]                                        |
| c47999.graph_c0 | 30.6202899    | 15.7295958    | 16.8407466    | 0              | 0              | 0              | 2.537E-23 | -Inf     | down      | --                                                                                            |
| c48000.graph_c0 | 7.69961942    | 8.11796583    | 7.7248654     | 5.05707624     | 4.80420518     | 4.6505371      | 1.176E-60 | -1.7887  | down      | PREDICTED: uncharacterized protein LOC105159735 isoform X3 [Sesamum indicum]                  |
| c48005.graph_c0 | 6.15667496    | 6.36164123    | 5.44452203    | 61.0571283     | 63.12233       | 60.9722217     | 3.504E-69 | 2.27665  | up        | PREDICTED: uncharacterized protein LOC105173858 [Sesamum indicum]                             |
| c48007.graph_c0 | 2.01089875    | 2.09918003    | 1.40278873    | 1.04393544     | 0.98027886     | 0.86887965     | 5.497E-12 | -2.01681 | down      | PREDICTED: uncharacterized protein LOC104226160 [Nicotiana sylvestris]                        |
| c48011.graph_c0 | 1.75428331    | 1.20414169    | 1.24524537    | 0.47357254     | 0.64686935     | 0.70350319     | 2.485E-11 | -2.29055 | down      | PREDICTED: NADP-dependent malic enzyme-like isoform X1 [Sesamum indicum]                      |
| c48012.graph_c1 | 0.99958718    | 0.86097117    | 0.77667992    | 4.17311786     | 4.34761634     | 3.36387103     | 1.782E-05 | 1.08325  | up        | PREDICTED: LOW QUALITY PROTEIN: phosphatidylinositol 4-phosphate 5-kinase 4 [Sesamum indicum] |
| c48013.graph_c0 | 47.3825275    | 51.1030022    | 46.3069789    | 49.2355517     | 50.8020746     | 49.3297897     | 7.86E-39  | -1.04524 | down      | PREDICTED: OBERON-like protein [Sesamum indicum]                                              |



| #ID             | 0 h-1<br>FPKM | 0 h-2<br>FPKM | 0 h-3<br>FPKM | 28 h-1<br>FPKM | 28 h-2<br>FPKM | 28 h-3<br>FPKM | FDR       | log2FC   | regulated | nr_annotation                                                                           |
|-----------------|---------------|---------------|---------------|----------------|----------------|----------------|-----------|----------|-----------|-----------------------------------------------------------------------------------------|
| c48014.graph_c0 | 2.84142316    | 3.35513216    | 3.03096774    | 14.1952624     | 15.414785      | 14.9534765     | 1.31E-28  | 1.18094  | up        | PREDICTED: uncharacterized protein LOC105158471, partial [Sesamum indicum]              |
| c48016.graph_c0 | 65.9167395    | 62.5008061    | 61.0645323    | 52.0933523     | 54.8218091     | 58.3579033     | 5.589E-57 | -1.28651 | down      | PREDICTED: probable F-box protein At1g60180 [Sesamum indicum]                           |
| c48019.graph_c0 | 7.41937765    | 6.14014529    | 5.93796295    | 6.24378633     | 5.60552209     | 5.79928422     | 1.429E-17 | -1.23182 | down      | PREDICTED: protein NRT1/ PTR FAMILY 5.10-like [Sesamum indicum]                         |
| c48023.graph_c1 | 48.7110722    | 50.9131656    | 51.7257519    | 57.3442612     | 54.0734152     | 49.1277467     | 1.438E-31 | -1.00666 | down      | unnamed protein product [Coffea canephora]                                              |
| c48024.graph_c0 | 4.30159372    | 3.12296125    | 3.94837017    | 3.53864256     | 3.38118259     | 3.44818371     | 4.463E-07 | -1.22366 | down      | hypothetical protein MIMGU_mgv1a020521mg, partial [Erythranthe guttata]                 |
| c48031.graph_c1 | 1.06918099    | 1.19723062    | 0.9547718     | 5.95318154     | 5.6724637      | 5.54557018     | 3.632E-12 | 1.32538  | up        | PREDICTED: cytochrome P450 CYP149A22-like [Sesamum indicum]                             |
| c48046.graph_c0 | 31.8626314    | 36.6153891    | 35.1060521    | 28.0064558     | 26.8723717     | 27.355429      | 1.13E-30  | -1.42437 | down      | PREDICTED: uncharacterized protein LOC105172478 [Sesamum indicum]                       |
| c48046.graph_c1 | 33.6910287    | 32.8451899    | 32.0027229    | 28.5703207     | 26.1756786     | 26.796407      | 6.497E-60 | -1.3631  | down      | PREDICTED: probable NOT transcription complex subunit VIP2 isoform X2 [Sesamum indicum] |
| c48050.graph_c1 | 0             | 0             | 0             | 4.29993541     | 5.17658469     | 6.92745738     | 8.131E-15 | Inf      | up        | unknown [Lotus japonicus]                                                               |
| c48052.graph_c1 | 0             | 0             | 0             | 0.8931728      | 0.96774155     | 1.7491721      | 3.35E-08  | Inf      | up        | --                                                                                      |
| c48055.graph_c0 | 0.36873413    | 0.30199366    | 0.17230471    | 4.14172299     | 3.21164577     | 3.87661393     | 1.541E-12 | 2.65424  | up        | farnesyl diphosphate synthase [Leibnitzia anandria]                                     |
| c48059.graph_c1 | 3.91055298    | 3.66788809    | 3.75901939    | 28.074795      | 26.268298      | 27.7206565     | 2.561E-74 | 1.7656   | up        | PREDICTED: protein transport protein Sec24-like At4g32640 [Sesamum indicum]             |
| c48062.graph_c3 | 76.9083771    | 74.9822743    | 73.076858     | 53.9971674     | 53.7523158     | 54.0337029     | 2.918E-80 | -1.56558 | down      | PREDICTED: probable protein phosphatase 2C b [Sesamum indicum]                          |
| c48066.graph_c0 | 0             | 0             | 0             | 1.69073652     | 1.9740214      | 3.18741454     | 4.406E-09 | Inf      | up        | predicted protein [Hordeum vulgare subsp. vulgare]                                      |
| c48067.graph_c0 | 0             | 0             | 0             | 7.11479202     | 7.76718805     | 12.1390073     | 1.046E-16 | Inf      | up        | --                                                                                      |
| c48069.graph_c1 | 47.843159     | 50.2609823    | 44.6417854    | 50.8208087     | 50.3781572     | 48.6427448     | 3.41E-37  | -1.01969 | down      | PREDICTED: protein FAR-RED IMPAIRED RESPONSE 1 [Sesamum indicum]                        |
| c48076.graph_c1 | 2.8987529     | 2.9923323     | 3.37579235    | 29.0342948     | 24.4913409     | 25.1780778     | 6.072E-37 | 1.99362  | up        | PREDICTED: aspartokinase 2, chloroplastic isoform X1 [Sesamum indicum]                  |
| c48076.graph_c2 | 37.8500862    | 36.1069281    | 35.3082089    | 38.5991255     | 36.7266439     | 38.0708809     | 7.958E-38 | -1.03612 | down      | PREDICTED: eukaryotic translation initiation factor 4G-like [Sesamum indicum]           |
| c48076.graph_c3 | 0             | 0             | 0             | 0.90046655     | 0.81303687     | 1.20712766     | 3.324E-11 | Inf      | up        | -                                                                                       |
| c48078.graph_c0 | 27.8483402    | 29.5806582    | 26.6249475    | 11.7392076     | 11.8107643     | 11.1551658     | 2.75E-172 | -2.36621 | down      | PREDICTED: ankyrin repeat protein SKIP35-like [Sesamum indicum]                         |
| c48078.graph_c1 | 38.3818327    | 36.728808     | 38.3099909    | 9.1231203      | 8.79175741     | 8.30335993     | 4.85E-103 | -3.20402 | down      | -                                                                                       |
| c48082.graph_c0 | 24.0632653    | 23.8961915    | 26.8553769    | 116.831563     | 112.506154     | 114.733633     | 8.442E-45 | 1.10928  | up        | PREDICTED: transmembrane 9 superfamily member 3 [Sesamum indicum]                       |
| c48090.graph_c0 | 0.32247233    | 0.96838571    | 0.20719485    | 11.2498094     | 10.7923683     | 9.0841302      | 4.984E-11 | 3.29249  | up        | hypothetical protein [Arabidopsis thaliana]                                             |
| c48090.graph_c2 | 51.6566556    | 53.9833048    | 47.0427886    | 41.1597459     | 41.7987386     | 44.4049395     | 3.199E-50 | -1.35047 | down      | hypothetical protein MIMGU_mgv1a003910mg [Erythranthe guttata]                          |

| #ID             | 0 h-1<br>FPKM | 0 h-2<br>FPKM | 0 h-3<br>FPKM | 28 h-1<br>FPKM | 28 h-2<br>FPKM | 28 h-3<br>FPKM | FDR       | log2FC   | regulated | nr_annotation                                                                                                                                                |
|-----------------|---------------|---------------|---------------|----------------|----------------|----------------|-----------|----------|-----------|--------------------------------------------------------------------------------------------------------------------------------------------------------------|
| c48090.graph_c3 | 0.99459919    | 0.9244812     | 1.46068496    | 9.55219698     | 9.18418075     | 9.47981522     | 1.373E-10 | 1.96536  | up        | hypothetical protein MIMGU_mgv1a003194mg [Erythranthe<br>cuffata]                                                                                            |
| c48091.graph_c1 | 21.4541658    | 22.0810455    | 17.3024902    | 200.646948     | 205.897286     | 199.631651     | 1.55E-162 | 2.22887  | up        | PREDICTED: pentatricopeptide repeat-containing protein<br>At2g13420, mitochondrial-like [Sesamum indicum]                                                    |
| c48094.graph_c0 | 31.198067     | 26.8513669    | 27.726314     | 26.616137      | 29.6189047     | 30.4336375     | 4.45E-25  | -1.07414 | down      | PREDICTED: sugar transporter ERD6-like 5 [Sesamum indicum]                                                                                                   |
| c48096.graph_c0 | 8.72749305    | 8.21178235    | 6.18340563    | 4.86003073     | 4.77720473     | 4.75889446     | 2.681E-14 | -1.76999 | down      | PREDICTED: putative SWI/SNF-related matrix-associated actin-<br>dependent regulator of chromatin subfamily A member 3-like 2<br>isoform X3 [Sesamum indicum] |
| c48100.graph_c0 | 51.3881423    | 53.4628498    | 47.4214159    | 47.7652609     | 47.0866051     | 46.1682906     | 2.889E-49 | -1.20025 | down      | PREDICTED: uncharacterized protein LOC105166426 [Sesamum<br>indicum]                                                                                         |
| c48103.graph_c0 | 13.7729291    | 12.2408412    | 11.8261732    | 69.68119       | 61.9228306     | 59.924674      | 2.465E-28 | 1.25041  | up        | PREDICTED: LOW QUALITY PROTEIN: probable<br>serine/threonine-protein kinase drkD [Sesamum indicum]                                                           |
| c48105.graph_c0 | 27.7789966    | 15.5684852    | 17.6882389    | 1.48097473     | 1.82839079     | 3.62538985     | 1.79E-11  | -4.21945 | down      | hypothetical protein AOL_s00169g48 [Arthrotrichy oligospora<br>ATCC 24927]                                                                                   |
| c48109.graph_c0 | 116.935893    | 113.453806    | 107.41553     | 98.8871054     | 97.3666075     | 103.128321     | 3.354E-55 | -1.26346 | down      | PREDICTED: cleft lip and palate transmembrane protein 1 homolog<br>[Sesamum indicum]                                                                         |
| c48112.graph_c3 | 7.9967825     | 6.88784262    | 7.24908971    | 1.48679465     | 1.54583558     | 2.0955485      | 7.859E-41 | -3.19777 | down      | PREDICTED: uncharacterized protein LOC105163706 [Sesamum<br>indicum]                                                                                         |
| c48114.graph_c0 | 159.373403    | 156.0553      | 157.89243     | 68.2115888     | 68.4282869     | 74.9292893     | 3.65E-164 | -2.25173 | down      | ribosomal protein L20 (chloroplast) [Andrographis paniculata]                                                                                                |
| c48118.graph_c0 | 2.55953286    | 2.19608216    | 3.21078914    | 0.53150107     | 0.27993912     | 0.61440908     | 5.419E-16 | -3.57375 | down      | PREDICTED: sodium/hydrogen exchanger 4 isoform X3 [Nelumbo<br>nucifera]                                                                                      |
| c48119.graph_c1 | 12.7431571    | 13.399073     | 11.1463225    | 12.8573538     | 10.2597567     | 10.8852443     | 3.312E-23 | -1.22185 | down      | PREDICTED: uncharacterized protein LOC105173907 [Sesamum<br>indicum]                                                                                         |
| c48122.graph_c1 | 181.404108    | 201.097442    | 159.934232    | 74.9320283     | 73.3906212     | 71.0651393     | 3.318E-45 | -2.39479 | down      | PREDICTED: NF-X1-type zinc finger protein NFXL1 [Sesamum<br>indicum]                                                                                         |
| c48126.graph_c0 | 0.08555543    | 0.0856411     | 0.05497106    | 1.6322563      | 2.03521227     | 2.28327053     | 1.814E-15 | 3.63341  | up        | PREDICTED: cysteine-rich receptor-like protein kinase 2<br>[Sesamum indicum]                                                                                 |
| c48128.graph_c0 | 6.89529398    | 7.06271482    | 5.93462562    | 6.182743       | 5.79815819     | 6.11494551     | 8.515E-35 | -1.22495 | down      | PREDICTED: uncharacterized protein LOC105167197 [Sesamum<br>indicum]                                                                                         |
| c48134.graph_c1 | 295.021142    | 296.319902    | 290.191209    | 194.669421     | 185.707728     | 188.152547     | 2.435E-90 | -1.7231  | down      | PREDICTED: protein ALUMINUM SENSITIVE 3 [Sesamum<br>indicum]                                                                                                 |
| c48135.graph_c0 | 3.10375323    | 2.9938844     | 2.75565345    | 1.4355027      | 1.66644559     | 2.87819513     | 4.646E-08 | -1.65202 | down      | PREDICTED: formin-like protein 3 [Nicotiana tomentosiformis]                                                                                                 |
| c48139.graph_c0 | 0             | 0             | 0.18038052    | 2.09140657     | 1.56594384     | 1.54007598     | 8.487E-10 | 3.71798  | up        | hypothetical protein VITISV_002420 [Vitis vinifera]                                                                                                          |
| c48142.graph_c0 | 11.8967129    | 11.6379751    | 10.4234639    | 113.517571     | 108.764936     | 116.895857     | 1.367E-84 | 2.23162  | up        | PREDICTED: pentatricopeptide repeat-containing protein<br>At5g39350 [Vitis vinifera]                                                                         |
| c48143.graph_c2 | 3.07489539    | 2.25351699    | 2.75184161    | 24.6228861     | 23.1329743     | 20.4828437     | 7.119E-28 | 1.98762  | up        | PREDICTED: protein transport protein SEC13 homolog B-like<br>[Sesamum indicum]                                                                               |

| #ID             | 0 h-1<br>FPKM | 0 h-2<br>FPKM | 0 h-3<br>FPKM | 28 h-1<br>FPKM | 28 h-2<br>FPKM | 28 h-3<br>FPKM | FDR       | log2FC   | regulated | nr_annotation                                                                                    |
|-----------------|---------------|---------------|---------------|----------------|----------------|----------------|-----------|----------|-----------|--------------------------------------------------------------------------------------------------|
| c48143.graph_c3 | 642.847733    | 657.767596    | 591.781889    | 397.408776     | 369.060911     | 357.624118     | 8.806E-87 | -1.84111 | down      | PREDICTED: haloacid dehalogenase-like hydrolase domain-containing protein 3 [Sesamum indicum]    |
| c48148.graph_c0 | 0.14414463    | 0.14428897    | 0             | 2.40956022     | 1.93912795     | 2.47909837     | 3.885E-09 | 3.49561  | up        | PREDICTED: SNF2 domain-containing protein CLASSY 3-like [Sesamum indicum]                        |
| c48150.graph_c0 | 4.66837668    | 5.34250533    | 4.53298916    | 2.51611968     | 2.38369009     | 2.64418658     | 1.018E-51 | -2.03636 | down      | PREDICTED: CST complex subunit CTC1 [Sesamum indicum]                                            |
| c48154.graph_c0 | 32.8359313    | 30.4537196    | 31.3819369    | 14.2419956     | 15.0216926     | 15.7045299     | 5.184E-87 | -2.16388 | down      | hypothetical protein MIMGU_mgv1a0241 / 2mg [Erythranthe diffusa]                                 |
| c48157.graph_c1 | 269.174604    | 258.621146    | 281.562204    | 284.5087       | 287.96606      | 282.904434     | 4.575E-32 | -1.01156 | down      | Metal tolerance protein 3 [Triticum urartu]                                                      |
| c48161.graph_c2 | 1.02361066    | 0.81970852    | 0.78922814    | 11.4568967     | 10.6131919     | 10.4009726     | 4.985E-16 | 2.53676  | up        | hypothetical protein MIMGU_mgv1a011590mg [Erythranthe diffusa]                                   |
| c48161.graph_c4 | 0.32271534    | 0.43071798    | 0.59901398    | 27.1814662     | 24.471724      | 23.7534971     | 5.52E-120 | 4.70272  | up        | PREDICTED: WD repeat-containing protein 44 [Sesamum indicum]                                     |
| c48162.graph_c0 | 3.25757107    | 2.73334534    | 3.93986616    | 0.03481741     | 0.09431057     | 0.02841072     | 1.527E-34 | -7.07624 | down      | PREDICTED: aluminum-activated malate transporter 9-like [Sesamum indicum]                        |
| c48163.graph_c0 | 2.00399786    | 3.26400743    | 2.66251208    | 2.61675211     | 2.20665565     | 2.63884466     | 0.0007659 | -1.17969 | down      | PREDICTED: uncharacterized aarF domain-containing protein kinase 1 [Sesamum indicum]             |
| c48166.graph_c0 | 68.3290786    | 69.0716222    | 64.9055587    | 68.5994472     | 68.1259569     | 68.3270765     | 1.13E-37  | -1.07038 | down      | PREDICTED: uroporphyrinogen decarboxylase 1, chloroplastic isoform X2 [Sesamum indicum]          |
| c48169.graph_c0 | 2.37666436    | 2.60973943    | 2.79497138    | 12.6253287     | 12.127316      | 12.1558714     | 7.472E-24 | 1.15336  | up        | PREDICTED: GPI inositol-deacylase A isoform X1 [Sesamum indicum]                                 |
| c48175.graph_c2 | 35.2834311    | 32.6548165    | 35.412006     | 12.665913      | 13.1543685     | 13.4918701     | 8.43E-140 | -2.48514 | down      | PREDICTED: transcription factor TGA1-like [Sesamum indicum]                                      |
| c48181.graph_c0 | 48.6639999    | 47.3497024    | 47.9800816    | 36.2009197     | 33.7725246     | 35.4953044     | 4.482E-80 | -1.5395  | down      | PREDICTED: probable leucine-rich repeat receptor-like protein kinase At1g35710 [Sesamum indicum] |
| c48182.graph_c0 | 16.0058479    | 17.278493     | 18.6188792    | 16.5940724     | 16.5275195     | 16.4255723     | 2.183E-16 | -1.15941 | down      | PREDICTED: C2 domain-containing protein At1g53590 isoform X2 [Sesamum indicum]                   |
| c48187.graph_c1 | 2.00113514    | 2.12381       | 2.10680212    | 29.9819455     | 31.7066364     | 30.1129969     | 1.27E-116 | 2.78959  | up        | PREDICTED: protein IQ-DOMAIN 31-like isoform X1 [Sesamum indicum]                                |
| c48188.graph_c0 | 31.15958      | 30.3344349    | 29.3016016    | 15.3528186     | 12.7825486     | 16.0207211     | 4.18E-116 | -2.12902 | down      | PREDICTED: nitronate monooxygenase [Sesamum indicum]                                             |
| c48195.graph_c0 | 0.30643743    | 0.15337214    | 0.06563071    | 1.29918227     | 1.40764774     | 1.87793062     | 3.985E-05 | 2.0522   | up        | hypothetical protein VITISV_040416 [Vitis vinifera]                                              |
| c48199.graph_c0 | 5.76441842    | 5.58028561    | 5.36340933    | 27.4070559     | 26.0292697     | 25.332521      | 7.598E-36 | 1.14719  | up        | PREDICTED: protein RIK isoform X2 [Sesamum indicum]                                              |
| c48202.graph_c0 | 3.2066345     | 3.30026364    | 2.90186781    | 26.8178924     | 25.1624504     | 24.0527499     | 3.199E-35 | 1.92508  | up        | hypothetical protein MIMGU_mgv1a010555mg [Erythranthe diffusa]                                   |
| c48203.graph_c1 | 4.53447169    | 3.53565167    | 3.98687808    | 17.5188641     | 19.1067603     | 17.6638337     | 7.958E-11 | 1.08109  | up        | Hypothetical protein [Arabidopsis thaliana]                                                      |
| c48205.graph_c0 | 8.51564998    | 7.11107824    | 7.43184127    | 5.26241138     | 4.87099776     | 4.6451734      | 4.277E-23 | -1.73133 | down      | PREDICTED: uncharacterized protein LOC105167185 isoform X1 [Sesamum indicum]                     |
| c48208.graph_c0 | 0             | 0             | 0             | 3.53153752     | 5.24798195     | 5.46323386     | 1.542E-14 | Inf      | up        | PREDICTED: 40S ribosomal protein S13-1-like [Camelina sativa]                                    |
| c48210.graph_c1 | 9.16181657    | 9.92822852    | 11.1252256    | 8.98015648     | 8.65982023     | 9.62076687     | 8.235E-10 | -1.24093 | down      | -                                                                                                |
| c48210.graph_c2 | 60.9603583    | 62.2634004    | 58.2383641    | 59.5883528     | 57.1452765     | 57.4924317     | 1.366E-45 | -1.14863 | down      | PREDICTED: uncharacterized protein LOC105170049 isoform X1 [Sesamum indicum]                     |

| #ID             | 0 h-1<br>FPKM | 0 h-2<br>FPKM | 0 h-3<br>FPKM | 28 h-1<br>FPKM | 28 h-2<br>FPKM | 28 h-3<br>FPKM | FDR       | log2FC   | regulated | nr_annotation                                                                                              |
|-----------------|---------------|---------------|---------------|----------------|----------------|----------------|-----------|----------|-----------|------------------------------------------------------------------------------------------------------------|
| c48211.graph_c0 | 0.50948854    | 0.35999909    | 0.23107516    | 3.68115137     | 3.6580747      | 3.50145871     | 1.117E-10 | 2.21836  | up        | PREDICTED: wall-associated receptor kinase-like 2 [Sesamum indicum]                                        |
| c48213.graph_c0 | 17.6485428    | 19.7836098    | 17.3081469    | 18.5225403     | 18.5303219     | 18.8550164     | 2.955E-30 | -1.05942 | down      | PREDICTED: probable ATP-dependent DNA helicase CHR12 [Sesamum indicum]                                     |
| c48214.graph_c0 | 0.53140258    | 0.35462313    | 0.50077379    | 3.24425076     | 2.95250231     | 3.61375021     | 7.763E-07 | 1.73261  | up        | PREDICTED: DNA mismatch repair protein MLH3 isoform X2 [Sesamum indicum]                                   |
| c48215.graph_c0 | 2.44028257    | 1.35129531    | 1.80145133    | 0              | 0              | 0              | 1.909E-21 | -Inf     | down      | --                                                                                                         |
| c48219.graph_c0 | 24.9993548    | 26.5097389    | 24.4332208    | 18.5715264     | 17.5110396     | 16.1983034     | 1.659E-75 | -1.62915 | down      | PREDICTED: transmembrane protein 45B-like [Sesamum indicum]                                                |
| c48220.graph_c0 | 1.77918022    | 3.49831782    | 1.55142941    | 0.09236414     | 0.16679231     | 0.30147353     | 4.099E-06 | -4.68946 | down      | hypothetical protein VITISV_010987 [Vitis vinifera]                                                        |
| c48221.graph_c0 | 36.4775065    | 39.4000221    | 37.0087301    | 18.5627043     | 16.4724732     | 18.0649064     | 1.52E-133 | -2.17834 | down      | hypothetical protein MIMGU_mgv1a025040mg, partial [Erythranthe guttata]                                    |
| c48222.graph_c0 | 15.1128631    | 14.33699      | 14.8510681    | 7.41236596     | 6.85472165     | 6.98571708     | 6.458E-93 | -2.15018 | down      | hypothetical protein MIMGU_mgv1a001261mg [Erythranthe guttata]                                             |
| c48223.graph_c0 | 6.10230826    | 4.32679665    | 5.88128078    | 3.69593539     | 5.0056247      | 3.99600536     | 7.839E-06 | -1.45289 | down      | -                                                                                                          |
| c48223.graph_c1 | 0.0411732     | 0.20607214    | 0.15872757    | 2.69319992     | 3.24227602     | 2.90575408     | 2.416E-12 | 3.34596  | up        | PREDICTED: uncharacterized protein LOC100255010 isoform X5 [Vitis vinifera]                                |
| c48224.graph_c0 | 573.009602    | 567.068485    | 517.664962    | 537.794633     | 501.884336     | 487.896438     | 5.622E-30 | -1.20745 | down      | -                                                                                                          |
| c48231.graph_c0 | 68.1693603    | 69.4663903    | 74.6127635    | 54.8386321     | 48.789153      | 50.4748275     | 4.686E-41 | -1.5536  | down      | PREDICTED: putative lysine-specific demethylase JMJD5 [Sesamum indicum]                                    |
| c48235.graph_c0 | 1.13225851    | 0.89574553    | 0.96217545    | 11.1890433     | 11.9242512     | 10.7872447     | 1.274E-52 | 2.41365  | up        | PREDICTED: pentatricopeptide repeat-containing protein At1g19720 isoform X1 [Sesamum indicum]              |
| c48239.graph_c2 | 0.38343273    | 0.47977086    | 0.49272624    | 3.48345877     | 3.58556979     | 3.32569447     | 2.309E-06 | 1.84502  | up        | -                                                                                                          |
| c48239.graph_c3 | 5507.69182    | 5503.88487    | 5444.07256    | 230.610798     | 273.697894     | 262.579239     | 0         | -5.51378 | down      | PREDICTED: beta-hexosaminidase 2 [Sesamum indicum]                                                         |
| c48239.graph_c6 | 79.6979073    | 80.0794895    | 73.5143895    | 60.1326108     | 58.0925606     | 59.2731757     | 8.948E-71 | -1.48376 | down      | PREDICTED: putative transcription elongation factor SPT5 homolog 1 [Sesamum indicum]                       |
| c48244.graph_c0 | 21.9910376    | 21.0604066    | 21.9261139    | 18.0580267     | 21.590909      | 18.9682974     | 4.264E-37 | -1.23963 | down      | hypothetical protein MIMGU_mgv1a001762mg [Erythranthe guttata]                                             |
| c48244.graph_c1 | 0             | 0             | 0             | 21.8802953     | 20.5008386     | 37.4288653     | 1.231E-18 | Inf      | up        | PREDICTED: putative mannan endo-1,4-beta-mannosidase 9 [Sesamum indicum]                                   |
| c48244.graph_c2 | 2586.72989    | 2714.42794    | 2573.21681    | 523.943497     | 548.343325     | 509.210625     | 3.58E-125 | -3.4065  | down      | PREDICTED: heat shock cognate 70 kDa protein 2 [Sesamum indicum]                                           |
| c48244.graph_c5 | 8.25090777    | 8.36371625    | 8.3658775     | 7.16063104     | 6.56818482     | 7.09214188     | 1.715E-36 | -1.35323 | down      | PREDICTED: uncharacterized protein LOC105164739 [Sesamum indicum]                                          |
| c48244.graph_c6 | 10.8041679    | 11.4365376    | 11.1309643    | 60.8561538     | 60.7131091     | 58.4960555     | 5.361E-49 | 1.34087  | up        | PREDICTED: uncharacterized protein LOC105158481 isoform X1 [Sesamum indicum]                               |
| c48245.graph_c0 | 6.666108      | 6.59801802    | 7.10251809    | 3.93562402     | 3.14913575     | 3.5547286      | 2.453E-58 | -2.028   | down      | PREDICTED: putative pentatricopeptide repeat-containing protein At3g16890, mitochondrial [Sesamum indicum] |
| c48250.graph_c1 | 1.997647      | 2.71380711    | 1.28352774    | 8.19274199     | 11.3300079     | 9.39314395     | 0.0022711 | 1.18486  | up        | PREDICTED: peptidyl-tRNA hydrolase, mitochondrial [Sesamum indicum]                                        |

| #ID             | 0 h-1<br>FPKM | 0 h-2<br>FPKM | 0 h-3<br>FPKM | 28 h-1<br>FPKM | 28 h-2<br>FPKM | 28 h-3<br>FPKM | FDR       | log2FC   | regulated | nr_annotation                                                                                     |
|-----------------|---------------|---------------|---------------|----------------|----------------|----------------|-----------|----------|-----------|---------------------------------------------------------------------------------------------------|
| c48250.graph_c2 | 46.6439445    | 42.8995301    | 42.008751     | 31.6550008     | 36.8550892     | 32.627649      | 2.233E-59 | -1.46907 | down      | hypothetical protein MIMGU_mgv1a010855mg [Erythranthe<br>cuttata]                                 |
| c48250.graph_c3 | 0.2846882     | 0.33246882    | 0.42680821    | 3.89680017     | 3.45617183     | 3.26417545     | 2.832E-08 | 2.2502   | up        | PREDICTED: probable pectin methyltransferase QUA2 [Sesamum<br>indicum]                            |
| c48251.graph_c0 | 1.45375946    | 1.9029737     | 1.50888107    | 0.93467046     | 0.58707464     | 1.16060527     | 1.904E-07 | -1.94681 | down      | PREDICTED: uncharacterized protein LOC104593668 [Nelumbo<br>nucifera]                             |
| c48253.graph_c0 | 2.99646679    | 3.15133906    | 3.16819746    | 3.28050582     | 3.53447449     | 2.81183399     | 8.549E-06 | -1.04476 | down      | PREDICTED: serine/threonine-protein kinase-like protein<br>At3g51990 [Sesamum indicum]            |
| c48253.graph_c1 | 5.06731958    | 6.01172591    | 4.52201825    | 56.624567      | 54.944626      | 52.2434408     | 9.1E-128  | 2.30344  | up        | PREDICTED: uncharacterized protein LOC105168293 [Sesamum<br>indicum]                              |
| c48253.graph_c2 | 28.369835     | 24.9372072    | 26.8865664    | 1.03095163     | 1.27992241     | 1.68249622     | 9.32E-183 | -5.41626 | down      | -                                                                                                 |
| c48256.graph_c0 | 87.7635569    | 89.0117409    | 89.2813527    | 65.5913128     | 67.3572094     | 63.7072848     | 6.646E-78 | -1.52703 | down      | PREDICTED: uncharacterized protein LOC105170589 [Sesamum<br>indicum]                              |
| c48257.graph_c0 | 2.59611333    | 2.41130576    | 2.38980843    | 12.8450276     | 12.0237655     | 11.2882714     | 7.221E-27 | 1.19918  | up        | PREDICTED: protein SHOU1 GRAVITROPISM 6 [Sesamum<br>indicum]                                      |
| c48258.graph_c1 | 180.188273    | 192.747522    | 186.461088    | 33.6832503     | 32.9201039     | 34.5425164     | 0         | -3.55804 | down      | PREDICTED: pentatricopeptide repeat-containing protein<br>At1g79540 [Sesamum indicum]             |
| c48258.graph_c2 | 84.9896801    | 87.1819714    | 91.7805206    | 76.4307196     | 79.9851513     | 78.3289684     | 3.904E-41 | -1.26073 | down      | PREDICTED: LRR receptor-like serine/threonine-protein kinase<br>ERECTA [Sesamum indicum]          |
| c48259.graph_c1 | 82.9022101    | 79.572592     | 86.6579304    | 90.9533971     | 77.1022837     | 80.1102253     | 2.722E-26 | -1.09696 | down      | PREDICTED: dehydrololichyl diphosphate synthase 6 [Sesamum<br>indicum]                            |
| c48264.graph_c0 | 50.9217011    | 50.0028489    | 48.4607675    | 36.0075095     | 38.221381      | 36.6969048     | 1.267E-78 | -1.51949 | down      | PREDICTED: phyto-sulfokine receptor 1 [Sesamum indicum]                                           |
| c48265.graph_c0 | 0.17151973    | 0.26534138    | 0.28052137    | 3.5357982      | 3.65295016     | 4.25379464     | 6.94E-28  | 2.90084  | up        | PREDICTED: osmotic avoidance abnormal protein 3-like<br>[Sesamum indicum]                         |
| c48267.graph_c0 | 0.36827736    | 0.12288205    | 0.15775033    | 3.07811144     | 2.0139464      | 2.4389105      | 9.839E-07 | 2.45609  | up        | hypothetical protein MIMGU_mgv1a013848mg [Erythranthe<br>cuttata]                                 |
| c48268.graph_c0 | 1.99837233    | 0.75014002    | 0.49384376    | 0              | 0              | 0              | 4.71E-06  | -Inf     | down      | PREDICTED: BAG family molecular chaperone regulator 6-like<br>[Phoenix dactylifera]               |
| c48270.graph_c0 | 6.5982191     | 6.36216899    | 5.72403673    | 5.40118508     | 5.21977768     | 5.4181768      | 1.249E-47 | -1.30889 | down      | PREDICTED: calcium-transporting ATPase 1, chloroplastic<br>[Sesamum indicum]                      |
| c48272.graph_c0 | 1.12104021    | 1.2871867     | 1.31347096    | 8.36332887     | 7.98404119     | 8.56472989     | 5.122E-14 | 1.65085  | up        | PREDICTED: uncharacterized protein LOC105162718 [Sesamum<br>indicum]                              |
| c48275.graph_c0 | 64.1686189    | 58.9482889    | 62.3491818    | 420.924073     | 453.632625     | 434.975798     | 2.75E-105 | 1.72933  | up        | PREDICTED: actin-1-like [Tarenaya hassleriana]                                                    |
| c48277.graph_c0 | 2.61766503    | 2.47196814    | 2.22137947    | 12.3483269     | 11.4086694     | 10.6912468     | 1.152E-07 | 1.14732  | up        | PREDICTED: histone deacetylase 5 [Sesamum indicum]                                                |
| c48278.graph_c0 | 23.6692639    | 24.3387699    | 23.7835043    | 13.5980335     | 14.8708946     | 15.2568409     | 1.18E-68  | -1.8056  | down      | G patch domain-containing protein 8 [Glycine soja]                                                |
| c48280.graph_c0 | 0.89800829    | 0.91653315    | 1.24448415    | 28.2566528     | 26.1832894     | 22.931887      | 3.346E-73 | 3.5649   | up        | PREDICTED: LRR receptor-like serine/threonine-protein kinase<br>ERL2 isoform X2 [Sesamum indicum] |
| c48283.graph_c1 | 15.1411206    | 15.9848716    | 15.2907611    | 14.8146861     | 12.8104404     | 14.4000316     | 5.306E-30 | -1.23358 | down      | PREDICTED: probable mitochondrial chaperone BCS1-B<br>[Sesamum indicum]                           |

| #ID             | 0 h-1<br>FPKM | 0 h-2<br>FPKM | 0 h-3<br>FPKM | 28 h-1<br>FPKM | 28 h-2<br>FPKM | 28 h-3<br>FPKM | FDR       | log2FC   | regulated | nr_annotation                                                                                           |
|-----------------|---------------|---------------|---------------|----------------|----------------|----------------|-----------|----------|-----------|---------------------------------------------------------------------------------------------------------|
| c48286.graph_c0 | 1.3564722     | 1.07312411    | 0.7872157     | 9.60434213     | 9.23175588     | 9.52385021     | 1.812E-29 | 2.05603  | up        | PREDICTED: uncharacterized protein LOC105179489 [Sesamum indicum]                                       |
| c48289.graph_c0 | 6.02672607    | 6.20678288    | 5.58503482    | 26.0143963     | 26.4547363     | 26.0504126     | 1.096E-26 | 1.05016  | up        | PREDICTED: glutamate receptor 3.3 [Sesamum indicum]                                                     |
| c48291.graph_c1 | 7.70223242    | 6.36908503    | 8.00420561    | 38.1633347     | 39.995792      | 44.1296137     | 1.281E-22 | 1.37869  | up        | PREDICTED: pyridoxal reductase, chloroplast [Sesamum indicum]                                           |
| c48293.graph_c0 | 25.2260864    | 22.4793291    | 24.0760773    | 264.383195     | 246.734706     | 237.405494     | 4.22E-165 | 2.29183  | up        | PREDICTED: apyrase 2-like [Sesamum indicum]                                                             |
| c48295.graph_c0 | 0.27826821    | 0.37853803    | 0.33007908    | 0.36818731     | 0.29498075     | 0.36814214     | 0.0006827 | -1.02753 | down      | PREDICTED: phragmoplast orienting kinesin 2 [Sesamum indicum]                                           |
| c48300.graph_c0 | 8.19241125    | 8.48339453    | 7.6616274     | 6.36483158     | 6.33226342     | 6.19887329     | 7.554E-46 | -1.45478 | down      | hypothetical protein MIMGU_mgv1a0002422mg, partial [Erythranthe guttata]                                |
| c48302.graph_c0 | 16.7475409    | 16.4509594    | 18.1019886    | 457.815694     | 442.534869     | 439.433144     | 0         | 3.61514  | up        | hypothetical protein MIMGU_mgv1a01074/mg [Erythranthe guttata]                                          |
| c48303.graph_c0 | 2.40777323    | 2.29894498    | 2.23726069    | 10.7958806     | 11.2061719     | 10.5448583     | 2.42E-09  | 1.13875  | up        | PREDICTED: altered inheritance rate of mitochondria protein 25 [Sesamum indicum]                        |
| c48303.graph_c3 | 38.8734828    | 46.5924893    | 44.0383634    | 29.3682741     | 29.5376991     | 31.244557      | 2.96E-24  | -1.61393 | down      | hexose transport protein [Actinidia deliciosa]                                                          |
| c48306.graph_c0 | 3.87315567    | 3.73856855    | 3.17738236    | 3.06004191     | 2.66081029     | 3.20965652     | 2.277E-28 | -1.36014 | down      | PREDICTED: helicase and polymerase-containing protein TEBICHI [Sesamum indicum]                         |
| c48309.graph_c2 | 0.38122797    | 0.25440647    | 0.32659536    | 3.50960768     | 5.00344212     | 2.93917466     | 5.013E-06 | 2.48165  | up        | -                                                                                                       |
| c48309.graph_c3 | 2.9383954     | 2.36081057    | 2.90649124    | 2.96456228     | 2.68940767     | 2.53370594     | 1.57E-09  | -1.09461 | down      | PREDICTED: aluminum-activated malate transporter 4-like [Sesamum indicum]                               |
| c48311.graph_c0 | 6.94288388    | 7.82352981    | 7.03554018    | 47.5193548     | 46.3160944     | 54.069103      | 3.759E-30 | 1.67249  | up        | cytochrome P450 CYP72A219-like [Sesamum indicum]                                                        |
| c48316.graph_c1 | 0.08012273    | 0.18714024    | 0.13728118    | 1.04818931     | 0.80620679     | 0.90283135     | 0.000304  | 1.67508  | up        | PREDICTED: probable inactive receptor kinase At5g10020 [Nicotiana glauca]                               |
| c48331.graph_c0 | 62.6073514    | 62.6990035    | 62.9979121    | 15.9700887     | 16.0712319     | 17.2952122     | 0         | -3.0226  | down      | PREDICTED: uncharacterized protein LOC105164372 [Sesamum indicum]                                       |
| c48334.graph_c1 | 4.16459769    | 4.73402457    | 6.07732348    | 31.8071097     | 28.6725171     | 30.0149404     | 5.474E-27 | 1.49991  | up        | PREDICTED: 3-hydroxyisobutyryl-CoA hydrolase-like protein 1, mitochondrial isoform X2 [Sesamum indicum] |
| c48336.graph_c0 | 11.0866325    | 12.4591662    | 10.1157304    | 11.8319396     | 10.5479026     | 11.1701977     | 1.674E-17 | -1.09372 | down      | PREDICTED: pentatricopeptide repeat-containing protein At2g21090-like [Sesamum indicum]                 |
| c48336.graph_c2 | 3.95123763    | 3.41063847    | 3.56896513    | 2.16420739     | 2.12317913     | 2.86971029     | 3.636E-17 | -1.69906 | down      | PREDICTED: ABC transporter G family member 5 [Sesamum indicum]                                          |
| c48336.graph_c3 | 2.06430917    | 1.52259304    | 1.25655111    | 1.42136338     | 1.54478261     | 1.56790604     | 0.0001292 | -1.17987 | down      | PREDICTED: pentatricopeptide repeat-containing protein At2g13600 [Sesamum indicum]                      |
| c48336.graph_c4 | 5.65315089    | 6.75679005    | 6.18026559    | 30.5595664     | 31.0253267     | 31.3747738     | 3.896E-31 | 1.23098  | up        | hypothetical protein MIMGU_mgv1a004418mg [Erythranthe guttata]                                          |
| c48340.graph_c0 | 81.3504491    | 87.2309412    | 81.811064     | 65.4073513     | 62.3756281     | 68.132748      | 4.025E-71 | -1.44402 | down      | PREDICTED: serine/threonine-protein kinase PBS1 [Sesamum indicum]                                       |
| c48340.graph_c3 | 140.626259    | 152.314374    | 135.124054    | 124.185764     | 123.929062     | 123.761915     | 4.169E-56 | -1.29281 | down      | hypothetical protein MIMGU_mgv1a000810mg [Erythranthe guttata]                                          |
| c48342.graph_c0 | 2.78737316    | 3.10904021    | 2.42203643    | 0.84892626     | 0.95812602     | 1.13353673     | 2.617E-27 | -2.58762 | down      | hypothetical protein MIMGU_mgv11b010420mg [Erythranthe guttata]                                         |

| #ID             | 0 h-1<br>FPKM | 0 h-2<br>FPKM | 0 h-3<br>FPKM | 28 h-1<br>FPKM | 28 h-2<br>FPKM | 28 h-3<br>FPKM | FDR       | log2FC   | regulated | nr_annotation                                                                                   |
|-----------------|---------------|---------------|---------------|----------------|----------------|----------------|-----------|----------|-----------|-------------------------------------------------------------------------------------------------|
| c48344.graph_c0 | 0.96360532    | 0.88418937    | 1.13508174    | 6.59489462     | 7.43004056     | 6.52432815     | 2.422E-06 | 1.69076  | up        | PREDICTED: uncharacterized protein LOC105167681 [Sesamum indicum]                               |
| c48347.graph_c1 | 1.67334669    | 1.82067641    | 1.68285659    | 8.56612847     | 9.16670916     | 7.55080805     | 6.675E-05 | 1.19686  | up        | PREDICTED: sulfhydryl oxidase 2 isoform X3 [Sesamum indicum]                                    |
| c48347.graph_c4 | 3.68510194    | 3.50435241    | 3.39377635    | 16.3823347     | 17.9757593     | 18.0666329     | 4.386E-10 | 1.21903  | up        | PREDICTED: sulfhydryl oxidase 2 isoform X1 [Sesamum indicum]                                    |
| c48348.graph_c0 | 523.793944    | 520.219895    | 501.906429    | 143.115546     | 141.020066     | 155.30762      | 2.82E-226 | -2.90427 | down      | PREDICTED: uncharacterized protein LOC105164444 [Sesamum indicum]                               |
| c48351.graph_c0 | 0.40058979    | 0.86881367    | 0.3431825     | 6.74489053     | 7.01007626     | 7.83991056     | 2.494E-12 | 2.65731  | up        | -                                                                                               |
| c48354.graph_c0 | 1.17986169    | 0.81196716    | 1.08974645    | 6.02941411     | 6.6295769      | 7.30339642     | 3.972E-10 | 1.60573  | up        | PREDICTED: uncharacterized protein LOC105158848 isoform X1 [Sesamum indicum]                    |
| c48359.graph_c0 | 0             | 0             | 0             | 3.85661726     | 4.78797522     | 4.032053       | 8.341E-13 | Inf      | up        | -                                                                                               |
| c48360.graph_c0 | 0.14221097    | 0.14235338    | 0             | 2.41168937     | 3.20407895     | 2.81131262     | 5.057E-12 | 3.81763  | up        | hypothetical protein MIMGU_mgv1a0115/5mg [Erythranthe outtata]                                  |
| c48364.graph_c0 | 0             | 0             | 0             | 2.7268429      | 3.8945684      | 4.97609143     | 3.635E-11 | Inf      | up        | predicted protein [Physcomitrella patens]                                                       |
| c48368.graph_c0 | 50.6210105    | 48.2156127    | 48.397202     | 48.6334513     | 45.2558341     | 42.9197252     | 1.587E-49 | -1.19639 | down      | PREDICTED: protein strawberry notch isoform X1 [Sesamum indicum]                                |
| c48372.graph_c0 | 10.5213438    | 9.1822564     | 10.1789313    | 46.0385991     | 43.7488723     | 42.621762      | 7.588E-32 | 1.05694  | up        | PREDICTED: acyl-CoA-binding domain-containing protein 4-like [Sesamum indicum]                  |
| c48373.graph_c0 | 91.0589542    | 96.7124474    | 92.5211978    | 34.1762099     | 33.4065337     | 35.6832538     | 3.87E-187 | -2.53086 | down      | PREDICTED: uncharacterized protein LOC105162592 [Sesamum indicum]                               |
| c48374.graph_c0 | 0             | 0             | 0             | 4.77808944     | 4.5128455      | 5.92527456     | 2.067E-29 | Inf      | up        | PREDICTED: GDSL esterase/lipase At1g296/0-like [Sesamum indicum]                                |
| c48377.graph_c0 | 0             | 0             | 0             | 1.49253921     | 1.32516259     | 2.88236288     | 1.06E-06  | Inf      | up        | -                                                                                               |
| c48384.graph_c0 | 0.90514359    | 0.78319572    | 0.94628774    | 6.37783048     | 5.84919002     | 6.22327306     | 2.173E-22 | 1.71655  | up        | PREDICTED: LOW QUALITY PROTEIN; probable serine/threonine-protein kinase GCN2 [Sesamum indicum] |
| c48386.graph_c0 | 1102.79499    | 1085.33769    | 1175.1755     | 487.540828     | 495.767895     | 483.341574     | 1.963E-90 | -2.28891 | down      | PREDICTED: uncharacterized protein LOC105166153 [Sesamum indicum]                               |
| c48390.graph_c0 | 0             | 0.10518253    | 0.0450095     | 1.52739167     | 2.29848579     | 1.49560696     | 1.505E-09 | 4.04905  | up        | PREDICTED: 7-hydroxymethyl chlorophyll a reductase, chloroplastic isoform X1 [Sesamum indicum]  |
| c48395.graph_c0 | 0.95892001    | 0.93854955    | 1.01318348    | 5.12636278     | 4.29301468     | 4.17043249     | 3.534E-07 | 1.13134  | up        | PREDICTED: protein FAM135B-like [Sesamum indicum]                                               |
| c48398.graph_c0 | 4.69575535    | 4.625847      | 6.13001299    | 44.367023      | 44.8526779     | 41.2423918     | 2.337E-39 | 1.98311  | up        | hypothetical protein MIMGU_mgv1a02/0/8mg [Erythranthe outtata]                                  |
| c48399.graph_c0 | 37.3037488    | 37.7549821    | 35.5393473    | 156.629426     | 162.132984     | 155.244485     | 3.446E-35 | 1.00955  | up        | PREDICTED: uncharacterized protein LOC105163762 isoform X1 [Sesamum indicum]                    |
| c48400.graph_c0 | 3.17388977    | 1.96335659    | 1.87889365    | 0              | 0              | 0              | 1.299E-28 | -Inf     | down      | lectin [Bryopsis plumosa]                                                                       |
| c48404.graph_c0 | 12.1733976    | 5.50316851    | 5.92931452    | 0              | 0              | 0              | 6.812E-15 | -Inf     | down      | PREDICTED: BTB/POZ and TAZ domain-containing protein 1-like [Phoenix dactylifera]               |
| c48409.graph_c2 | 2.03328549    | 1.50666658    | 1.59485793    | 0.01919195     | 0.06931413     | 0.0626419      | 7.692E-49 | -6.17345 | down      | PREDICTED: subtilisin-like protease SDD1 [Sesamum indicum]                                      |
| c48410.graph_c0 | 28.4445447    | 30.4858485    | 29.365708     | 28.9548423     | 31.2842397     | 29.7510311     | 3.397E-37 | -1.06348 | down      | PREDICTED: DNA polymerase eta [Sesamum indicum]                                                 |

| #ID             | 0 h-1<br>FPKM | 0 h-2<br>FPKM | 0 h-3<br>FPKM | 28 h-1<br>FPKM | 28 h-2<br>FPKM | 28 h-3<br>FPKM | FDR       | log2FC   | regulated | nr_annotation                                                                                     |
|-----------------|---------------|---------------|---------------|----------------|----------------|----------------|-----------|----------|-----------|---------------------------------------------------------------------------------------------------|
| c48412.graph_c0 | 5.0552222     | 3.99496124    | 5.47045109    | 0.90241209     | 0.87299304     | 0.99934693     | 1.274E-23 | -3.47941 | down      | PREDICTED: auxin-induced protein 15A-like [Sesamum indicum]                                       |
| c48415.graph_c3 | 1.20581159    | 1.11761021    | 1.31995776    | 18.8907913     | 17.3496823     | 17.0303648     | 2.071E-41 | 2.77776  | up        | hypothetical protein MTR_4g125190 [Medicago truncatula]                                           |
| c48417.graph_c0 | 140.228979    | 140.396089    | 133.290965    | 93.390565      | 90.2722483     | 92.4465482     | 3.079E-91 | -1.67391 | down      | PREDICTED: E3 ubiquitin-protein ligase UPL1-like [Sesamum indicum]                                |
| c48418.graph_c0 | 0.503599      | 0.6398234     | 0.7218152     | 0.42232252     | 0.43215999     | 0.41353408     | 6.596E-06 | -1.65156 | down      | PREDICTED: putative multidrug resistance protein [Sesamum indicum]                                |
| c48419.graph_c0 | 135.851885    | 127.64814     | 133.021202    | 116.736192     | 117.285132     | 114.839393     | 2.276E-55 | -1.27529 | down      | PREDICTED: asparagine--tRNA ligase, chloroplastic/mitochondrial [Sesamum indicum]                 |
| c48420.graph_c1 | 0.98505564    | 1.23567292    | 0.6569526     | 7.34963889     | 7.56884367     | 7.13605639     | 6.636E-34 | 1.85267  | up        | PREDICTED: protein MOUN2 homolog isoform X2 [Sesamum indicum]                                     |
| c48421.graph_c2 | 26.7137185    | 26.9526942    | 26.5362326    | 15.9329361     | 16.3615804     | 17.7036878     | 4.86E-69  | -1.77178 | down      | PREDICTED: peptide chain release factor PrfB1, chloroplastic [Sesamum indicum]                    |
| c48422.graph_c0 | 3.24039605    | 2.90114458    | 3.02603947    | 13.3992092     | 13.8416426     | 13.929655      | 9.642E-18 | 1.07714  | up        | PREDICTED: myosin-1 [Sesamum indicum]                                                             |
| c48423.graph_c0 | 2.24473163    | 1.98771253    | 1.94153684    | 10.2070706     | 8.75333785     | 8.36302105     | 4.328E-13 | 1.05648  | up        | PREDICTED: protein WEAK CHLOROPLAST MOVEMENT UNDER BLUE LIGHT 1 isoform X2 [Sesamum indicum]      |
| c48428.graph_c0 | 0             | 0             | 0.09659047    | 3.76945304     | 6.7575998      | 6.15168579     | 5.1E-12   | 6.30202  | up        | hypothetical protein MGL_1430 [Malassezia globosa CBS 7966]                                       |
| c48429.graph_c0 | 28.010976     | 29.3651948    | 25.7533319    | 23.139894      | 22.9217503     | 25.5417856     | 1.148E-54 | -1.30413 | down      | PREDICTED: uncharacterized protein LOC105159568 [Sesamum indicum]                                 |
| c48429.graph_c6 | 2.30294875    | 2.47601441    | 2.5209536     | 18.845409      | 19.3105095     | 19.7279702     | 3.107E-15 | 1.89581  | up        | PREDICTED: protein GLUTAMINE DUMPER 2-like [Sesamum indicum]                                      |
| c48431.graph_c0 | 0.43342642    | 0.82433483    | 0.61266713    | 5.89072115     | 5.14811321     | 6.14342516     | 3.5E-11   | 2.10757  | up        | PREDICTED: urease accessory protein D isoform X1 [Sesamum indicum]                                |
| c48435.graph_c0 | 0             | 0             | 0             | 2.56908608     | 4.32702797     | 5.64402802     | 8.116E-09 | Inf      | up        | 60S ribosomal protein L10 [Lichtheimia corymbifera IMRC-FSI1-96821]                               |
| c48437.graph_c0 | 52.1613896    | 54.9147417    | 49.9702234    | 44.2844807     | 44.3958612     | 43.8087327     | 2.015E-61 | -1.33521 | down      | PREDICTED: uncharacterized protein LOC105158158 [Sesamum indicum]                                 |
| c48450.graph_c1 | 28.2379813    | 29.6384057    | 26.6675958    | 20.150683      | 18.9920304     | 19.8925274     | 8.485E-88 | -1.60765 | down      | PREDICTED: uncharacterized protein LOC105178025 [Sesamum indicum]                                 |
| c48454.graph_c0 | 22.4617397    | 21.8653997    | 21.2823135    | 5.09222147     | 4.86825729     | 5.02999243     | 0         | -3.21968 | down      | PREDICTED: DNA repair protein UVH3 [Sesamum indicum]                                              |
| c48457.graph_c0 | 2.20226858    | 1.94921896    | 2.62147583    | 14.0852458     | 12.7785064     | 11.7409121     | 1.287E-19 | 1.41701  | up        | PREDICTED: beta-galactosidase 3-like [Sesamum indicum]                                            |
| c48458.graph_c0 | 0             | 0             | 0             | 0.62718406     | 0.63707445     | 1.11951235     | 6.341E-07 | Inf      | up        | Inositol-3-phosphate synthase [Ectocarpus siliculosus]                                            |
| c48459.graph_c1 | 17.1861742    | 16.1318925    | 13.9081467    | 13.2687868     | 15.8438795     | 12.3437381     | 4.943E-22 | -1.27689 | down      | PREDICTED: carboxyl-terminal-processing peptidase 1, chloroplastic [Sesamum indicum]              |
| c48463.graph_c0 | 2.34722391    | 1.9509858     | 2.20834468    | 14.7290402     | 13.6977731     | 14.5045628     | 1.184E-33 | 1.632    | up        | PREDICTED: uncharacterized protein LOC105169809 [Sesamum indicum]                                 |
| c48464.graph_c0 | 0.8999303     | 0.40946884    | 0.10513146    | 6.30280006     | 5.20765319     | 5.87082112     | 1.289E-08 | 2.54849  | up        | PREDICTED: auxin response factor 8-like isoform X2 [Nicotiana tomentosiformis]                    |
| c48464.graph_c2 | 289.038472    | 267.831424    | 288.709742    | 148.213469     | 147.101586     | 149.354423     | 1.27E-114 | -2.0179  | down      | PREDICTED: probable LRR receptor-like serine/threonine-protein kinase At5g10290 [Sesamum indicum] |



| #ID             | 0 h-1<br>FPKM | 0 h-2<br>FPKM | 0 h-3<br>FPKM | 28 h-1<br>FPKM | 28 h-2<br>FPKM | 28 h-3<br>FPKM | FDR       | log2FC   | regulated | nr_annotation                                                                                       |
|-----------------|---------------|---------------|---------------|----------------|----------------|----------------|-----------|----------|-----------|-----------------------------------------------------------------------------------------------------|
| c48465.graph_c0 | 1.93038801    | 2.35239079    | 1.79755436    | 19.7639279     | 16.9453815     | 13.7877637     | 3.322E-12 | 1.96377  | up        | PREDICTED: elongation factor G-1, chloroplastic [Sesamum indicum]                                   |
| c48468.graph_c0 | 1.48522514    | 1.37658552    | 1.48444575    | 0.39979743     | 0.21658776     | 0.48934716     | 1.862E-13 | -3.06273 | down      | PREDICTED: scarecrow-like protein 21 [Sesamum indicum]                                              |
| c48469.graph_c2 | 168.329457    | 173.348289    | 155.66403     | 68.7022407     | 61.2045928     | 63.884017      | 1.45E-187 | -2.44915 | down      | PREDICTED: rhomboid protein 2-like [Sesamum indicum]                                                |
| c48469.graph_c3 | 4.62646793    | 5.03658871    | 3.80821212    | 20.0587263     | 19.0135586     | 19.0103688     | 2.291E-28 | 1.0203   | up        | PREDICTED: probable ubiquitin-conjugating enzyme E2 24 [Sesamum indicum]                            |
| c48471.graph_c1 | 8.16750424    | 8.58041953    | 8.52115284    | 42.1403972     | 44.2576322     | 36.4004756     | 4.195E-16 | 1.18904  | up        | PREDICTED: methyltransferase-like protein 22 [Sesamum indicum]                                      |
| c48474.graph_c2 | 3.94079196    | 4.24639451    | 3.00865555    | 65.8247886     | 60.3615496     | 58.9503857     | 3.4E-153  | 2.96035  | up        | PREDICTED: LOW QUALITY PROTEIN: probable acyl-activating enzyme 16, chloroplastic [Sesamum indicum] |
| c48475.graph_c2 | 0.29560054    | 0.19726436    | 0.12661947    | 52.6359888     | 48.6892493     | 44.1776953     | 2.72E-102 | 6.79423  | up        | PREDICTED: MADS-box protein SVP-like isoform X1 [Sesamum indicum]                                   |
| c48479.graph_c1 | 2.41993983    | 2.11956765    | 1.63260221    | 15.5653651     | 15.4038908     | 15.6791784     | 8.16E-16  | 1.83221  | up        | PREDICTED: dystrophia myotonica WD repeat-containing protein-like [Sesamum indicum]                 |
| c48480.graph_c0 | 0             | 0             | 0             | 3.68363669     | 5.78806657     | 6.79236671     | 6.698E-13 | Inf      | up        | hypothetical protein SELMODRAFT_2/0900 [Selaginella moellendorffii]                                 |
| c48484.graph_c0 | 26.3009618    | 24.5694197    | 24.4561556    | 25.9719939     | 25.1654955     | 26.9816337     | 7.213E-35 | -1.03696 | down      | PREDICTED: uncharacterized protein LOC105160250 [Sesamum indicum]                                   |
| c48489.graph_c0 | 13.960049     | 13.6982247    | 12.451232     | 6.32461435     | 7.26247303     | 7.14891207     | 1.553E-84 | -2.04078 | down      | PREDICTED: BTB/POZ domain-containing protein At2g04740 isoform X1 [Sesamum indicum]                 |
| c48492.graph_c0 | 26.7311619    | 26.7579291    | 29.2324602    | 5.2327711      | 4.52365055     | 5.72348095     | 1.7E-117  | -3.50872 | down      | hypothetical protein MIMGU_mgv1a013606mg [Erythranthe guttata]                                      |
| c48492.graph_c2 | 10.8446446    | 11.3489358    | 10.4518482    | 0.82400899     | 0.1940877      | 0.46774582     | 2.29E-139 | -5.54671 | down      | hypothetical protein VITISV_043907 [Vitis vinifera]                                                 |
| c48492.graph_c3 | 1.03781954    | 1.45440226    | 1.1669343     | 0.39599766     | 0.30647037     | 0.36159882     | 6E-19     | -2.87251 | down      | OSJNBb0012A12.6 [Oryza sativa Japonica Group]                                                       |
| c48494.graph_c0 | 40.4070459    | 40.307389     | 39.7329529    | 30.9388542     | 31.1601032     | 30.4481398     | 1.477E-73 | -1.47058 | down      | PREDICTED: chromatin modification-related protein eaf-1 isoform X2 [Sesamum indicum]                |
| c48495.graph_c0 | 0.92749032    | 1.04744714    | 1.1001801     | 8.48667838     | 7.74070619     | 8.12389961     | 3.811E-22 | 1.89291  | up        | PREDICTED: uncharacterized protein LOC105160781 [Sesamum indicum]                                   |
| c48498.graph_c0 | 3530.09566    | 3650.77638    | 3524.72972    | 1741.83808     | 1873.00714     | 1923.67125     | 2.765E-59 | -2.04099 | down      | hypothetical protein MIMGU_mgv1a00495/mg [Erythranthe guttata]                                      |
| c48506.graph_c0 | 41.3151423    | 40.6495642    | 35.4952345    | 27.5466939     | 28.0390239     | 28.5976306     | 4.437E-71 | -1.56905 | down      | hypothetical protein MIMGU_mgv1a010122mg [Erythranthe guttata]                                      |
| c48506.graph_c1 | 0.88428517    | 0.66387798    | 0.67470273    | 4.67961104     | 5.13195602     | 5.6868153      | 3.881E-11 | 1.71463  | up        | PREDICTED: uncharacterized protein LOC105174972 isoform X1 [Sesamum indicum]                        |
| c48506.graph_c2 | 0.55393766    | 0.63370553    | 0.33049335    | 5.07561929     | 4.54386095     | 4.49364666     | 9.546E-18 | 2.13229  | up        | PREDICTED: probable L-type lectin-domain containing receptor kinase S.7 [Sesamum indicum]           |
| c48506.graph_c5 | 2.19585028    | 2.97277131    | 2.24352616    | 16.7834417     | 21.8036258     | 18.5946639     | 7.99E-18  | 1.8573   | up        | PREDICTED: CO(2)-response secreted protease-like [Sesamum indicum]                                  |
| c48510.graph_c0 | 150.853964    | 153.062023    | 148.623132    | 152.454072     | 163.27342      | 153.728231     | 1.349E-35 | -1.03755 | down      | hypothetical protein M569_12680 [Genlisea aurea]                                                    |
| c48519.graph_c2 | 33.0446698    | 32.2610242    | 34.3379375    | 14.0838529     | 16.5759373     | 15.9884228     | 2.65E-119 | -2.18604 | down      | hypothetical protein MIMGU_mgv1a005028mg [Erythranthe guttata]                                      |
| c48526.graph_c0 | 3.15509773    | 3.20152088    | 3.6101049     | 0.09423727     | 0.19853731     | 0.15379368     | 9.022E-52 | -5.5729  | down      | hypothetical protein MIMGU_mgv1a026599mg [Erythranthe guttata]                                      |

| #ID             | 0 h-1<br>FPKM | 0 h-2<br>FPKM | 0 h-3<br>FPKM | 28 h-1<br>FPKM | 28 h-2<br>FPKM | 28 h-3<br>FPKM | FDR       | log2FC   | regulated | nr_annotation                                                                           |
|-----------------|---------------|---------------|---------------|----------------|----------------|----------------|-----------|----------|-----------|-----------------------------------------------------------------------------------------|
| c48529.graph_c0 | 8.18357843    | 6.66427142    | 7.02015265    | 5.49781258     | 5.32736905     | 5.71695806     | 1.501E-25 | -1.49141 | down      | PREDICTED: LOW QUALITY PROTEIN: uncharacterized protein LOC105155975 [Sesamum indicum]  |
| c48536.graph_c0 | 0             | 0             | 0.29304319    | 1.35906571     | 1.73591016     | 1.677004       | 1.06E-07  | 2.89541  | up        | PREDICTED: glycerophosphodiester phosphodiesterase GDPD6 [Solanum lycopersicum]         |
| c48537.graph_c0 | 0.87745541    | 0.61483384    | 1.80410391    | 72.0634378     | 74.6825544     | 95.7503055     | 9.566E-41 | 5.09973  | up        | hypothetical protein CARUB_v10002736mg [Capsella rubella]                               |
| c48546.graph_c0 | 11.0039397    | 9.90831546    | 8.45786808    | 5.10127287     | 5.33145374     | 5.73310064     | 1.471E-30 | -1.94837 | down      | PREDICTED: cytosolic Fe-S cluster assembly factor narfl [Sesamum indicum]               |
| c48549.graph_c0 | 1.36240801    | 1.55859686    | 1.50064134    | 27.1877962     | 27.0002795     | 27.4253937     | 8.337E-81 | 3.1148   | up        | dimethylaniline monooxygenase, putative [Ricinus communis]                              |
| c48551.graph_c0 | 7.73833146    | 7.69642587    | 8.35046257    | 4.95720527     | 4.6223753      | 4.42747907     | 2.344E-45 | -1.85582 | down      | PREDICTED: probable galactinol--sucrose galactosyltransferase 1 [Sesamum indicum]       |
| c48553.graph_c0 | 2.35059646    | 2.43903377    | 2.24703878    | 1.29171704     | 1.48609114     | 1.41104091     | 2.956E-13 | -1.83824 | down      | PREDICTED: uncharacterized protein LOC105425958 [Maus domestical]                       |
| c48554.graph_c1 | 57.8001558    | 60.7583452    | 54.0284198    | 15.8320837     | 15.5855906     | 14.6622688     | 0         | -2.99494 | down      | unnamed protein product [Coffea canephora]                                              |
| c48555.graph_c0 | 42.8824173    | 43.8463307    | 41.8432478    | 36.2400035     | 35.0838759     | 35.7278376     | 1.342E-62 | -1.35439 | down      | PREDICTED: cytokinesis protein sepH-like [Sesamum indicum]                              |
| c48560.graph_c1 | 20.9709972    | 19.6728273    | 20.2482362    | 18.5730972     | 20.0033972     | 20.7623494     | 1.383E-21 | -1.12725 | down      | PREDICTED: glucose-induced degradation protein 8 homolog isoform X1 [Sesamum indicum]   |
| c48561.graph_c0 | 0             | 0             | 0             | 1.623625       | 3.94298377     | 9.95932805     | 0.0022523 | Inf      | up        | putative 40S ribosomal protein S21-2 [Wolffia australiana]                              |
| c48562.graph_c0 | 18.0271954    | 13.9705138    | 12.8105031    | 5.9774383      | 8.06834161     | 6.70046015     | 5.393E-16 | -2.19808 | down      | TBC1 domain family member 15 [Morus notabilis]                                          |
| c48565.graph_c0 | 0.05165816    | 0             | 0.06638278    | 9.31112367     | 6.81379599     | 7.59780088     | 3.684E-31 | 6.55143  | up        | PREDICTED: shikimate O-hydroxycinnamoyltransferase-like [Sesamum indicum]               |
| c48566.graph_c0 | 0             | 0             | 0.09451842    | 3.52821752     | 4.05446315     | 5.36540292     | 2.761E-14 | 5.9694   | up        | predicted protein [Hordeum vulgare subsp. vulgare]                                      |
| c48568.graph_c1 | 31.3670313    | 29.8177411    | 28.0172029    | 26.4100054     | 26.7308012     | 26.6479375     | 6.592E-53 | -1.25008 | down      | PREDICTED: DEAD-box ATP-dependent RNA helicase ISE2, chloroplastic [Sesamum indicum]    |
| c48571.graph_c0 | 4.71332335    | 3.59082585    | 4.60973743    | 1.13062211     | 1.35604884     | 1.273709       | 2.151E-25 | -2.87102 | down      | hypothetical protein VITISV_032357 [Vitis vinifera]                                     |
| c48572.graph_c0 | 44.3257829    | 42.8917044    | 43.4242122    | 38.4323791     | 35.6700725     | 34.9701423     | 1.028E-62 | -1.3509  | down      | hypothetical protein MIMGU_mgv1a000550mg [Erythranthe ontifata]                         |
| c48573.graph_c0 | 31.5285691    | 32.7981346    | 29.2785752    | 20.6739445     | 17.729301      | 18.904886      | 2.55E-105 | -1.79725 | down      | PREDICTED: transcription initiation factor TFIID subunit 1 isoform X2 [Sesamum indicum] |
| c48574.graph_c0 | 1.14820929    | 0.53876205    | 0.6455288     | 4.45942293     | 4.77992679     | 4.53260599     | 9.931E-07 | 1.47744  | up        | PREDICTED: glucan endo-1,3-beta-glucosidase 4-like isoform X1 [Sesamum indicum]         |
| c48574.graph_c1 | 57.9622402    | 58.3229425    | 55.3674373    | 44.0604472     | 43.3142616     | 44.7932703     | 6.171E-72 | -1.46691 | down      | PREDICTED: thylakoid lumenal 19 kDa protein, chloroplastic [Sesamum indicum]            |
| c48575.graph_c1 | 34.2174392    | 37.123103     | 37.5857879    | 12.7323516     | 12.9751527     | 12.5463784     | 1.078E-93 | -2.60136 | down      | hypothetical protein MIMGU_mgv1a015601mg [Erythranthe ontifata]                         |
| c48576.graph_c0 | 4.06726727    | 4.86165896    | 6.51787698    | 5.2339764      | 4.96129444     | 4.46952768     | 0.0037893 | -1.17197 | down      | orf25 gene product (mitochondrion) [Beta vulgaris subsp. vulgaris]                      |
| c48580.graph_c0 | 64.162535     | 64.944975     | 62.5629616    | 50.1341574     | 53.3377262     | 54.5859414     | 5.612E-44 | -1.36815 | down      | PREDICTED: homeobox-leucine zipper protein HOX11 [Sesamum indicum]                      |

| #ID             | 0 h-1<br>FPKM | 0 h-2<br>FPKM | 0 h-3<br>FPKM | 28 h-1<br>FPKM | 28 h-2<br>FPKM | 28 h-3<br>FPKM | FDR       | log2FC   | regulated | nr_annotation                                                                                   |
|-----------------|---------------|---------------|---------------|----------------|----------------|----------------|-----------|----------|-----------|-------------------------------------------------------------------------------------------------|
| c48580.graph_c2 | 0.69241881    | 1.07320593    | 0.6601635     | 15.0973801     | 14.8041224     | 13.8559445     | 5.934E-74 | 3.08404  | up        | PREDICTED: cinnamoyl-CoA reductase 2 [Sesamum indicum]                                          |
| c48580.graph_c3 | 2.58146671    | 2.13614937    | 2.56536855    | 1.70108358     | 1.60368011     | 2.28623345     | 2.534E-08 | -1.47075 | down      | -                                                                                               |
| c48580.graph_c4 | 40.6532393    | 39.579848     | 41.740125     | 10.6648534     | 9.07197446     | 9.5535695      | 0         | -3.14906 | down      | PREDICTED: uncharacterized protein LOC105176765 [Sesamum indicum]                               |
| c48582.graph_c0 | 55.5944087    | 53.9995446    | 52.3078534    | 44.7163522     | 44.7512881     | 46.1210573     | 5.46E-62  | -1.34556 | down      | PREDICTED: uncharacterized protein LOC105174456 [Sesamum indicum]                               |
| c48587.graph_c1 | 3.66530488    | 3.17457423    | 3.03982718    | 13.6974737     | 14.1586946     | 14.2295112     | 6.291E-13 | 1.00242  | up        | PREDICTED: rab3 GTPase-activating protein catalytic subunit isoform X4 [Sesamum indicum]        |
| c48588.graph_c0 | 446.523713    | 412.155812    | 456.124903    | 429.054818     | 464.432122     | 474.877669     | 3.674E-25 | -1.03324 | down      | vacuolar-processing enzyme precursor [Sesamum indicum]                                          |
| c48589.graph_c2 | 1.13414962    | 1.07336065    | 1.24543776    | 6.77419311     | 6.08939724     | 6.65279054     | 9.569E-14 | 1.40704  | up        | PREDICTED: GPI ethanolamine phosphate transferase 2 isoform X1 [Sesamum indicum]                |
| c48596.graph_c0 | 1.11405151    | 1.37755932    | 1.17896495    | 13.5741513     | 14.7934314     | 11.9702812     | 2.681E-18 | 2.36656  | up        | PREDICTED: early nodulin-like protein 1 [Nelumbo nucifera]                                      |
| c48596.graph_c1 | 18.9954413    | 19.1119724    | 17.7754101    | 18.6200996     | 18.0427552     | 18.0824137     | 1.345E-34 | -1.11936 | down      | hypothetical protein MIMGU_mgv1a011046mg [Erythranthe diffusa]                                  |
| c48601.graph_c0 | 0.40448621    | 0.17352482    | 0.185636      | 2.89778559     | 3.03354051     | 2.60445323     | 3.224E-10 | 2.4002   | up        | PREDICTED: lactosylceramide alpha-2,3-sialyltransferase [Sesamum indicum]                       |
| c48601.graph_c2 | 289.713444    | 303.527481    | 314.682415    | 123.92504      | 124.036969     | 141.235623     | 1.067E-86 | -2.31295 | down      | PREDICTED: B2 protein [Sesamum indicum]                                                         |
| c48601.graph_c3 | 0.89603625    | 1.02981253    | 0.76762804    | 28.364858      | 35.2366379     | 30.1324396     | 4.954E-64 | 4.03238  | up        | PREDICTED: cytochrome P450 CYP756A12-like [Sesamum indicum]                                     |
| c48601.graph_c8 | 39.9759573    | 38.244221     | 29.4577054    | 19.0766864     | 20.3123968     | 8.01363413     | 1.142E-17 | -2.27407 | down      | PREDICTED: B2 protein [Sesamum indicum]                                                         |
| c48602.graph_c0 | 26.7012916    | 24.2013024    | 22.655186     | 26.1713336     | 25.260826      | 24.513322      | 4.148E-28 | -1.04275 | down      | PREDICTED: mediator of RNA polymerase II transcription subunit 15a isoform X2 [Sesamum indicum] |
| c48604.graph_c0 | 0.71166757    | 0.61523745    | 0.58196791    | 4.34948363     | 3.33279253     | 4.54674011     | 1.823E-07 | 1.59231  | up        | PREDICTED: probable serine/threonine-protein kinase At5g41260 [Sesamum indicum]                 |
| c48612.graph_c0 | 23.4005982    | 25.7291448    | 23.5430479    | 12.1587054     | 11.1337321     | 11.9097019     | 4.59E-103 | -2.13591 | down      | PREDICTED: autophagy-related protein 9 [Sesamum indicum]                                        |
| c48612.graph_c1 | 37.4865573    | 37.6019452    | 35.079399     | 2.93929609     | 3.11323915     | 3.92052955     | 5.18E-232 | -4.55394 | down      | hypothetical protein CICLE_v10018809mg [Citrus clementina]                                      |
| c48616.graph_c0 | 10.0101968    | 9.12893406    | 8.8761612     | 8.51079072     | 8.39268993     | 8.65691711     | 8.575E-25 | -1.22138 | down      | PREDICTED: deSI-like protein At4g17486 [Sesamum indicum]                                        |
| c48617.graph_c0 | 0.6290517     | 0.53708137    | 0.66570522    | 0.30927637     | 0.25496517     | 0.34014681     | 1.194E-08 | -2.10899 | down      | hypothetical protein VITISV_012155 [Vitis vinifera]                                             |
| c48618.graph_c3 | 2.68109055    | 3.70992462    | 3.95197037    | 3.83989052     | 3.46706112     | 3.22685123     | 0.0007617 | -1.06871 | down      | PREDICTED: dnaJ homolog subfamily C member 21 [Sesamum indicum]                                 |
| c48620.graph_c1 | 236.748792    | 237.107703    | 249.172695    | 218.954988     | 210.662541     | 217.406415     | 6.363E-50 | -1.25138 | down      | hypothetical protein VITISV_027576 [Vitis vinifera]                                             |
| c48620.graph_c2 | 7.48928205    | 7.03237904    | 8.00582523    | 4.47977463     | 4.52323563     | 3.3803174      | 4.057E-19 | -1.95625 | down      | -                                                                                               |
| c48620.graph_c4 | 0.60275155    | 0.42234858    | 0.54219172    | 7.79775905     | 6.96153694     | 6.39865438     | 2.079E-13 | 2.66428  | up        | -                                                                                               |
| c48622.graph_c1 | 56.6734261    | 62.1634886    | 53.7146262    | 46.7979366     | 45.501782      | 47.8754345     | 1.24E-48  | -1.38917 | down      | PREDICTED: uncharacterized protein LOC105161451 [Sesamum indicum]                               |
| c48623.graph_c1 | 2.70995311    | 1.87800004    | 2.74573613    | 1.43930722     | 2.01773708     | 1.63806673     | 7.781E-07 | -1.61774 | down      | -                                                                                               |

| #ID             | 0 h-1<br>FPKM | 0 h-2<br>FPKM | 0 h-3<br>FPKM | 28 h-1<br>FPKM | 28 h-2<br>FPKM | 28 h-3<br>FPKM | FDR       | log2FC   | regulated | nr_annotation                                                                                     |
|-----------------|---------------|---------------|---------------|----------------|----------------|----------------|-----------|----------|-----------|---------------------------------------------------------------------------------------------------|
| c48623.graph_c3 | 584.225012    | 601.156751    | 572.264226    | 2656.68077     | 2742.5137      | 2722.20038     | 2.396E-23 | 1.1179   | up        | PREDICTED: CBL-interacting serine/threonine-protein kinase 3-like [Sesamum indicum]               |
| c48623.graph_c4 | 3.074017      | 1.53854758    | 0.65837226    | 12.6603411     | 10.5905788     | 8.96343179     | 0.0018275 | 1.53592  | up        | -                                                                                                 |
| c48624.graph_c0 | 1.86339681    | 2.08048534    | 1.93405047    | 22.4502274     | 22.2927924     | 23.5471881     | 9.49E-29  | 2.44785  | up        | PREDICTED: pyridoxal biosynthesis protein PDX2 [Sesamum indicum]                                  |
| c48625.graph_c0 | 222.081868    | 232.184438    | 219.954492    | 68.8673372     | 75.2456568     | 71.4575456     | 7.07E-214 | -2.73547 | down      | hypothetical protein MIMGU_mgv1a00485 /mg [Erythranthe                                            |
| c48627.graph_c1 | 6.95907194    | 9.27134874    | 7.5272943     | 2.51071312     | 2.62833454     | 4.81004155     | 2.813E-15 | -2.3432  | down      | hypothetical protein MIMGU_mgv1a018596mg [Erythranthe                                             |
| c48628.graph_c2 | 26.8079395    | 26.2365559    | 25.5626701    | 212.709102     | 221.357859     | 220.505402     | 4.92E-105 | 1.96788  | up        | PREDICTED: non-specific lipid-transfer protein-like protein At2g13820 [Sesamum indicum]           |
| c48633.graph_c0 | 8.88027629    | 9.27864242    | 8.49980776    | 40.0222822     | 39.9362442     | 39.5260495     | 1.528E-31 | 1.07425  | up        | PREDICTED: homeobox-leucine zipper protein MERISTEM L1-like [Sesamum indicum]                     |
| c48637.graph_c0 | 14.8027536    | 14.0899275    | 13.5023116    | 4.99504386     | 5.68093627     | 4.70297885     | 7.678E-52 | -2.55312 | down      | PREDICTED: kinesin-1-like protein PSS1 isoform X2 [Sesamum indicum]                               |
| c48639.graph_c1 | 4.74010102    | 7.5648984     | 5.11432411    | 0.58501326     | 1.14445961     | 1.00777276     | 9.672E-13 | -3.75967 | down      | PREDICTED: multiple C2 and transmembrane domain-containing protein 1 [Sesamum indicum]            |
| c48639.graph_c2 | 216.740662    | 209.092159    | 224.914944    | 201.50545      | 201.782612     | 200.793497     | 3.387E-46 | -1.19853 | down      | PREDICTED: uncharacterized protein LOC105176680 [Sesamum indicum]                                 |
| c48646.graph_c1 | 3.09969039    | 2.3270957     | 3.37042105    | 0.43323791     | 0.86058106     | 0.56562975     | 1.914E-17 | -3.33599 | down      | BnaC03g12490D [Brassica napus]                                                                    |
| c48646.graph_c2 | 152.514859    | 159.352951    | 149.523227    | 130.382397     | 132.865063     | 131.909221     | 1.913E-56 | -1.31373 | down      | PREDICTED: WD-40 repeat-containing protein MSI1 [Sesamum indicum]                                 |
| c48649.graph_c0 | 29.2552007    | 31.6708577    | 28.9330782    | 28.599575      | 27.5609892     | 27.8578036     | 1.488E-42 | -1.18713 | down      | PREDICTED: DNA (cytosine-5)-methyltransferase DRM2-like [Sesamum indicum]                         |
| c48649.graph_c1 | 20.6978063    | 20.4363731    | 20.5173327    | 21.0427049     | 21.3646289     | 21.2066199     | 2.505E-33 | -1.04528 | down      | PREDICTED: uncharacterized protein LOC105175481 [Sesamum indicum]                                 |
| c48652.graph_c0 | 8.5244646     | 7.71251974    | 8.84768326    | 65.5296627     | 67.8270593     | 62.1729686     | 8.163E-47 | 1.87079  | up        | PREDICTED: uncharacterized protein LOC105158144 [Sesamum indicum]                                 |
| c48653.graph_c0 | 1.69299816    | 2.95669919    | 3.19392142    | 14.5037354     | 16.5230392     | 15.445224      | 4.23E-14  | 1.46983  | up        | PREDICTED: serine carboxypeptidase-like 7 [Sesamum indicum]                                       |
| c48658.graph_c0 | 53.7132597    | 51.0684712    | 50.0749632    | 39.0978617     | 36.5347165     | 40.0187101     | 3.221E-70 | -1.51057 | down      | PREDICTED: calmodulin-binding receptor-like cytoplasmic kinase 2 [Sesamum indicum]                |
| c48669.graph_c0 | 2.2211366     | 2.56304084    | 2.21997103    | 1.47978351     | 1.76123032     | 1.48192109     | 7.26E-11  | -1.65922 | down      | PREDICTED: pentatricopeptide repeat-containing protein At4g25270, chloroplastic [Sesamum indicum] |
| c48669.graph_c1 | 3.17070809    | 2.67513002    | 2.91034673    | 0.16460374     | 0.20807044     | 0.29549368     | 2.578E-39 | -4.7997  | down      | PREDICTED: probable serine/threonine protein kinase IRE [Sesamum indicum]                         |
| c48671.graph_c0 | 59.0592952    | 57.1006374    | 57.103794     | 29.9352496     | 31.5697072     | 31.564076      | 7.28E-126 | -1.98671 | down      | PREDICTED: protein DAMAGED DNA-BINDING 2 [Sesamum indicum]                                        |
| c48672.graph_c0 | 7.45352615    | 5.16530058    | 4.91183395    | 35.142218      | 40.0075526     | 36.4964255     | 3.246E-10 | 1.58485  | up        | -                                                                                                 |
| c48676.graph_c0 | 2.27398857    | 2.32368782    | 2.37425934    | 15.7697204     | 14.1453131     | 14.1603785     | 1.413E-15 | 1.56912  | up        | PREDICTED: probable receptor-like protein kinase At1g80640 isoform X2 [Sesamum indicum]           |

| #ID             | 0 h-1<br>FPKM | 0 h-2<br>FPKM | 0 h-3<br>FPKM | 28 h-1<br>FPKM | 28 h-2<br>FPKM | 28 h-3<br>FPKM | FDR       | log2FC   | regulated | nr_annotation                                                                                      |
|-----------------|---------------|---------------|---------------|----------------|----------------|----------------|-----------|----------|-----------|----------------------------------------------------------------------------------------------------|
| c48680.graph_c0 | 29.2128647    | 26.8476754    | 34.0815793    | 15.7119235     | 13.676233      | 16.012702      | 4.46E-17  | -2.08189 | down      | PREDICTED: zinc finger A20 and AN1 domain-containing stress-associated protein 5 [Sesamum indicum] |
| c48681.graph_c1 | 12.0052704    | 12.2244866    | 9.73512533    | 7.7324754      | 9.5353183      | 10.0414064     | 2.464E-18 | -1.4019  | down      | PREDICTED: uncharacterized protein LOC105173885 isoform X2 [Sesamum indicum]                       |
| c48681.graph_c2 | 1.96716664    | 1.8351816     | 2.13236728    | 8.76314668     | 10.0638131     | 9.96806227     | 5.427E-22 | 1.18686  | up        | PREDICTED: subtilisin-like protease [Sesamum indicum]                                              |
| c48683.graph_c0 | 0.51029758    | 0.178783      | 0.3278763     | 5.00689807     | 4.65470795     | 5.03889179     | 8.205E-21 | 2.76758  | up        | PREDICTED: probable ATP-dependent RNA helicase DHX35 isoform X3 [Sesamum indicum]                  |
| c48684.graph_c0 | 7.35794011    | 7.43512132    | 7.21466513    | 8.23699172     | 7.89490699     | 6.59723211     | 8.575E-13 | -1.04462 | down      | PREDICTED: ATPase ASNA1 homolog 2-like [Sesamum indicum]                                           |
| c48684.graph_c1 | 15.2928437    | 18.0014422    | 15.558821     | 143.643414     | 133.915892     | 136.711963     | 7.65E-136 | 1.99377  | up        | Beta-galactosidase 8 [Morus notabilis]                                                             |
| c48695.graph_c0 | 96.0625346    | 90.8982787    | 98.029186     | 437.756957     | 435.153362     | 454.759997     | 4.17E-47  | 1.12913  | up        | PREDICTED: pre-mRNA-splicing factor 18 [Sesamum indicum]                                           |
| c48696.graph_c1 | 17.9791517    | 16.820126     | 16.9136305    | 103.048489     | 106.036305     | 102.037824     | 8.282E-68 | 1.49882  | up        | hypothetical protein MIMGU_mgv1a0087951mg, partial [Erythranthe guttata]                           |
| c48697.graph_c0 | 1.85551436    | 1.92880977    | 1.696599      | 20.513933      | 20.2783678     | 21.2467239     | 2.432E-49 | 2.41163  | up        | PREDICTED: pentatricopeptide repeat-containing protein Atlg07740, mitochondrial [Sesamum indicum]  |
| c48702.graph_c1 | 19.5881959    | 22.3311175    | 23.6857832    | 16.8070829     | 17.8978331     | 17.3850726     | 6.673E-16 | -1.42554 | down      | PREDICTED: phosphatase SGK2-like isoform X2 [Sesamum indicum]                                      |
| c48703.graph_c0 | 8.64905604    | 9.78068421    | 8.97521018    | 10.0472139     | 9.07169213     | 9.27153932     | 9.571E-15 | -1.03975 | down      | calcium-dependent protein kinase 34 [Brassica napus]                                               |
| c48704.graph_c0 | 1.82642369    | 2.25484485    | 1.2517476     | 0.53097368     | 0.43946783     | 0.54158774     | 2.228E-09 | -2.90326 | down      | PREDICTED: uncharacterized protein LOC104774238, partial [Camelina sativa]                         |
| c48706.graph_c0 | 1.07175988    | 1.32040996    | 0.79456955    | 6.53118698     | 4.78797137     | 5.20716141     | 1.095E-05 | 1.28815  | up        | PREDICTED: uncharacterized protein LOC105173691 [Sesamum indicum]                                  |
| c48706.graph_c3 | 0.68505914    | 0.68574513    | 0.52819687    | 12.6133916     | 8.06200789     | 9.75071801     | 2.082E-11 | 2.9149   | up        | -                                                                                                  |
| c48708.graph_c1 | 660.78492     | 638.12528     | 697.367549    | 483.254048     | 502.067416     | 514.457463     | 1.496E-48 | -1.50377 | down      | PREDICTED: 2-alkenal reductase (NADP(+)-dependent)-like [Sesamum indicum]                          |
| c48710.graph_c0 | 19.2124042    | 17.1896139    | 18.5067435    | 14.7822415     | 16.2841125     | 17.1362526     | 9.194E-38 | -1.27789 | down      | unnamed protein product [Vitis vinifera]                                                           |
| c48714.graph_c0 | 39.1761932    | 44.4406617    | 39.1071889    | 34.5432313     | 36.5331        | 30.6326538     | 2.979E-33 | -1.36187 | down      | hypothetical protein MIMGU_mgv1a0225922mg, partial [Erythranthe guttata]                           |
| c48714.graph_c2 | 1.3731092     | 0.8246905     | 1.76449969    | 8.9817107      | 10.902964      | 11.9707042     | 4.025E-07 | 1.91215  | up        | -                                                                                                  |
| c48714.graph_c5 | 4.32498834    | 3.57639409    | 4.41860869    | 3.55338224     | 3.75485178     | 2.78801047     | 8.35E-13  | -1.37987 | down      | PREDICTED: leucine-rich repeat receptor-like protein FASCIATED EAR2 [Sesamum indicum]              |
| c48716.graph_c0 | 0             | 0             | 0             | 2.29607672     | 3.69120404     | 6.35189266     | 7.501E-06 | Inf      | up        | unknown [Lotus japonicus]                                                                          |
| c48717.graph_c0 | 48.3775243    | 48.5310695    | 47.8817715    | 14.0699257     | 14.900078      | 13.660378      | 0         | -2.85475 | down      | hypothetical protein MIMGU_mgv1a002554mg [Erythranthe guttata]                                     |
| c48722.graph_c0 | 194.910592    | 182.679612    | 183.06037     | 1302.17076     | 1387.49018     | 1375.44825     | 4.57E-103 | 1.76828  | up        | PREDICTED: 60S ribosomal protein L7-2-like [Sesamum indicum]                                       |
| c48725.graph_c0 | 36.3825832    | 36.15212      | 36.2562037    | 33.647878      | 34.071122      | 32.3295442     | 3.779E-48 | -1.21161 | down      | hypothetical protein MIMGU_mgv1a0000431mg, partial [Erythranthe guttata]                           |

| #ID             | 0 h-1<br>FPKM | 0 h-2<br>FPKM | 0 h-3<br>FPKM | 28 h-1<br>FPKM | 28 h-2<br>FPKM | 28 h-3<br>FPKM | FDR       | log2FC   | regulated | nr_annotation                                                                                     |
|-----------------|---------------|---------------|---------------|----------------|----------------|----------------|-----------|----------|-----------|---------------------------------------------------------------------------------------------------|
| c48725.graph_c1 | 0.25179482    | 0.20163756    | 0.19413978    | 1.20781994     | 1.37144693     | 1.49328971     | 0.0001836 | 1.56578  | up        | PREDICTED: DNA polymerase epsilon catalytic subunit A [Sesamum indicum]                           |
| c48727.graph_c1 | 0.72000353    | 0.60060375    | 0.38551377    | 2.61647208     | 2.51992423     | 2.84669313     | 0.0090124 | 1.14349  | up        | hypothetical protein MIMGU_mgv1a024288mg, partial [Erythranthe guttata]                           |
| c48728.graph_c0 | 45.9005398    | 46.6562834    | 42.187843     | 30.6804338     | 31.6567045     | 32.0156228     | 1.445E-85 | -1.60338 | down      | PREDICTED: protein cfxQ homolog [Sesamum indicum]                                                 |
| c48730.graph_c1 | 1.41100183    | 2.82482947    | 2.53847051    | 14.357112      | 10.5556883     | 9.53959014     | 0.0037314 | 1.25016  | up        | PREDICTED: 3-oxoacyl-[acyl-carrier-protein] reductase 4 [Sesamum indicum]                         |
| c48730.graph_c2 | 67.0908578    | 73.4480572    | 68.4497681    | 316.456289     | 314.468336     | 307.073069     | 1.041E-41 | 1.07549  | up        | PREDICTED: LOW QUALITY PROTEIN: dedicator of cytokinesis protein 7 [Sesamum indicum]              |
| c48735.graph_c0 | 0             | 0             | 0             | 0.62309522     | 0.68889375     | 1.16214997     | 3.17E-08  | Inf      | up        | predicted protein [Hordeum vulgare subsp. vulgare]                                                |
| c48736.graph_c1 | 75.128419     | 79.189465     | 73.340915     | 39.4345052     | 41.4923833     | 38.89617       | 1.06E-134 | -2.01628 | down      | PREDICTED: crossover junction endonuclease MUS81 isoform X1 [Sesamum indicum]                     |
| c48736.graph_c4 | 84.7408446    | 88.8407055    | 87.1460658    | 82.0121558     | 80.4394045     | 82.5824992     | 2.244E-47 | -1.18024 | down      | PREDICTED: vacuolar-sorting receptor 1-like [Sesamum indicum]                                     |
| c48739.graph_c1 | 8.28706107    | 8.59810965    | 9.45732013    | 70.6638667     | 70.1540213     | 66.7013332     | 4.48E-110 | 1.8853   | up        | PREDICTED: pentatricopeptide repeat-containing protein At1g74850, chloroplastic [Sesamum indicum] |
| c48739.graph_c3 | 11.343087     | 12.3185021    | 12.5136297    | 11.2772933     | 7.79475566     | 9.32910582     | 4.839E-12 | -1.44043 | down      | Os01g0916200 [Oryza sativa Japonica Group]                                                        |
| c48743.graph_c0 | 85.088583     | 88.4511418    | 79.1937555    | 68.5591069     | 65.2050551     | 65.9407455     | 5.807E-69 | -1.42926 | down      | PREDICTED: non-lysosomal glucosylceramidase [Sesamum indicum]                                     |
| c48745.graph_c1 | 21.221314     | 21.4460368    | 20.2437043    | 12.5279237     | 12.04519       | 11.1388673     | 7.95E-101 | -1.90723 | down      | PREDICTED: phosphoinositide phosphatase SAC2 [Sesamum indicum]                                    |
| c48751.graph_c0 | 680.067546    | 668.498249    | 714.345067    | 179.368139     | 171.683895     | 169.389507     | 7.99E-177 | -3.07827 | down      | PREDICTED: UBPI-associated protein 2C [Sesamum indicum]                                           |
| c48751.graph_c1 | 193.601193    | 208.676203    | 192.893131    | 85.1411371     | 75.9825195     | 78.8452136     | 7.13E-184 | -2.40073 | down      | PREDICTED: UBPI-associated protein 2C [Sesamum indicum]                                           |
| c48756.graph_c1 | 6.89438335    | 6.50916845    | 7.09771213    | 30.0078476     | 30.6417204     | 28.9234037     | 2.526E-18 | 1.03599  | up        | PREDICTED: probable beta-1,3-galactosyltransferase 9 isoform X1 [Sesamum indicum]                 |
| c48756.graph_c3 | 45.550011     | 34.1967168    | 32.5925547    | 11.285961      | 9.17114813     | 15.0417782     | 1.412E-19 | -2.74671 | down      | -                                                                                                 |
| c48757.graph_c1 | 62.5392369    | 63.0335974    | 58.5651272    | 62.2760495     | 59.562946      | 57.8935768     | 2.116E-41 | -1.1248  | down      | putative movement protein [Nicotiana tabacum]                                                     |
| c48762.graph_c2 | 4.24403252    | 4.43709482    | 2.54508324    | 65.049487      | 68.5122041     | 64.2663307     | 2.174E-77 | 3.05477  | up        | PREDICTED: uncharacterized GPI-anchored protein At3g06035-like [Sesamum indicum]                  |
| c48762.graph_c3 | 0.10589435    | 0.31800116    | 0.13607843    | 5.77225521     | 6.18467557     | 5.65213574     | 4.69E-12  | 3.88512  | up        | -                                                                                                 |
| c48765.graph_c0 | 2.08574268    | 2.48933724    | 2.88643591    | 23.2487469     | 22.03114       | 21.3971454     | 7.125E-71 | 2.06505  | up        | PREDICTED: probable galacturonosyltransferase 4 [Sesamum indicum]                                 |
| c48769.graph_c0 | 0.06857308    | 0.16016406    | 0.08811912    | 3.28934206     | 3.05996649     | 2.73830002     | 6.894E-21 | 3.75091  | up        | PREDICTED: uncharacterized protein At5g41620-like [Sesamum indicum]                               |
| c48772.graph_c0 | 1.18838513    | 0.97876434    | 0.96653288    | 5.81638608     | 5.77484211     | 5.39737734     | 1.303E-14 | 1.35001  | up        | hypothetical protein MIMGU_mgv1a002585mg [Erythranthe guttata]                                    |
| c48773.graph_c0 | 140.508411    | 130.60974     | 137.682426    | 115.383594     | 109.349464     | 107.962975     | 1.102E-65 | -1.38782 | down      | PREDICTED: uncharacterized protein LOC105180349 [Sesamum indicum]                                 |
| c48774.graph_c0 | 996.611934    | 1006.31246    | 973.257363    | 613.360498     | 632.20189      | 670.367882     | 1.081E-80 | -1.72529 | down      | -                                                                                                 |

| #ID             | 0 h-1<br>FPKM | 0 h-2<br>FPKM | 0 h-3<br>FPKM | 28 h-1<br>FPKM | 28 h-2<br>FPKM | 28 h-3<br>FPKM | FDR       | log2FC   | regulated | nr_annotation                                                                                     |
|-----------------|---------------|---------------|---------------|----------------|----------------|----------------|-----------|----------|-----------|---------------------------------------------------------------------------------------------------|
| c48776.graph_c0 | 12.2160605    | 11.8554792    | 10.3377872    | 95.0655823     | 93.4118865     | 89.279331      | 3.601E-67 | 1.92426  | up        | PREDICTED: uncharacterized protein LOC104109628 isoform X2 [Nicotiana tomentosiformis]            |
| c48781.graph_c0 | 0.46229822    | 0.42419771    | 0.29703576    | 4.87193738     | 5.3848636      | 5.43769968     | 1.004E-14 | 2.64407  | up        | PREDICTED: pullulanase 1, chloroplastic isoform X2 [Sesamum indicum]                              |
| c48782.graph_c0 | 0.53919581    | 0.28407144    | 0.36467787    | 3.14538799     | 2.56995857     | 2.53295044     | 2.623E-11 | 1.70871  | up        | PREDICTED: uncharacterized protein LOC105163648 [Sesamum indicum]                                 |
| c48784.graph_c2 | 85.6961487    | 81.1126469    | 79.9804274    | 15.6919466     | 14.4015805     | 16.7960266     | 0         | -3.48511 | down      | beta-D-glucosidase [Tropaeolum majus]                                                             |
| c48784.graph_c3 | 77.8386146    | 76.3447544    | 78.6625433    | 67.0792657     | 69.8564987     | 66.546603      | 2.434E-56 | -1.28539 | down      | PREDICTED: ubiquitin domain-containing protein DSK2a-like isoform X2 [Sesamum indicum]            |
| c48784.graph_c4 | 64.5642357    | 62.0357526    | 59.6649709    | 54.1664135     | 53.5712477     | 52.1174167     | 1.38E-49  | -1.31035 | down      | PREDICTED: probable LRR receptor-like serine/threonine-protein kinase At3g47570 [Sesamum indicum] |
| c48784.graph_c5 | 2.73719116    | 2.83778676    | 2.00994229    | 1.13678558     | 1.02641079     | 1.4493871      | 1.895E-08 | -2.15513 | down      | -                                                                                                 |
| c48784.graph_c6 | 0.05383449    | 0.0538884     | 0             | 1.34986758     | 1.16581239     | 0.71835712     | 8.084E-07 | 3.83536  | up        | PREDICTED: auxin response factor 18-like [Sesamum indicum]                                        |
| c48787.graph_c0 | 0.04887022    | 0             | 0             | 1.27866932     | 1.25072839     | 1.62304135     | 8.422E-13 | 5.35123  | up        | PREDICTED: phosphate transporter PHO1 homolog 3-like isoform X3 [Sesamum indicum]                 |
| c48795.graph_c1 | 69.509698     | 65.2057454    | 64.9619738    | 19.9190177     | 23.0321809     | 19.4017164     | 1.41E-228 | -2.76958 | down      | hypothetical protein MIMGU_mgv1a013489mg [Erythranthe guttata]                                    |
| c48796.graph_c6 | 4.67929302    | 4.18509333    | 3.87825663    | 25.7782922     | 25.3103869     | 25.6983457     | 5.031E-37 | 1.50288  | up        | hypothetical protein MIMGU_mgv1a006652mg [Erythranthe guttata]                                    |
| c48796.graph_c7 | 2.24395288    | 3.025124      | 2.48824038    | 31.5524996     | 33.4884684     | 32.2395717     | 4.56E-131 | 2.5575   | up        | hypothetical protein MIMGU_mgv1a025096mg, partial [Erythranthe guttata]                           |
| c48798.graph_c0 | 3.66660695    | 1.92845142    | 2.71523717    | 1.49051984     | 2.36534486     | 2.54307239     | 0.0022379 | -1.46385 | down      | PREDICTED: uncharacterized protein LOC105168156 [Sesamum indicum]                                 |
| c48800.graph_c1 | 165.431296    | 162.251253    | 166.810563    | 157.263416     | 157.011589     | 160.541012     | 4.17E-43  | -1.1492  | down      | photosystem II protein D1 [Phaseolus vulgaris]                                                    |
| c48801.graph_c1 | 17.2652332    | 16.1643563    | 15.6136608    | 14.5850517     | 12.6545227     | 13.2262306     | 2.007E-51 | -1.36676 | down      | PREDICTED: molybdenum cofactor sulfurase isoform X3 [Sesamum indicum]                             |
| c48802.graph_c0 | 39.0645936    | 40.8979432    | 39.1570034    | 35.0013769     | 32.6754212     | 33.4538548     | 2.435E-57 | -1.32663 | down      | PREDICTED: cyclin-T1-3-like [Sesamum indicum]                                                     |
| c48804.graph_c0 | 11.634823     | 14.1539296    | 14.1888237    | 9.55805326     | 10.2738404     | 10.7509057     | 5.567E-14 | -1.4787  | down      | PREDICTED: uncharacterized protein LOC105155609 [Sesamum indicum]                                 |
| c48808.graph_c0 | 18.1327747    | 16.6296111    | 18.5871908    | 15.8831156     | 17.6080904     | 15.540159      | 1.847E-23 | -1.21336 | down      | hypothetical protein MIMGU_mgv1a005510mg [Erythranthe guttata]                                    |
| c48808.graph_c2 | 487.48894     | 468.605443    | 478.682683    | 173.157193     | 170.96675      | 179.934152     | 2.96E-155 | -2.54322 | down      | PREDICTED: 26S proteasome non-ATPase regulatory subunit 14-like [Cucumis sativus]                 |
| c48810.graph_c0 | 2.20864639    | 2.83781775    | 2.28750291    | 80.6928294     | 83.6526471     | 77.7897925     | 0         | 3.95456  | up        | hypothetical protein MIMGU_mgv1a006553mg [Erythranthe guttata]                                    |
| c48810.graph_c1 | 8.36340862    | 7.56594321    | 8.67831011    | 8.48386388     | 9.01019551     | 8.01024759     | 6.874E-11 | -1.04019 | down      | PREDICTED: alpha,alpha-trehalose-phosphate synthase [UDP-forming] 1-like [Sesamum indicum]        |
| c48810.graph_c2 | 54.8362296    | 54.7939873    | 53.5671838    | 47.1378294     | 46.5098387     | 46.9972682     | 2.469E-58 | -1.30477 | down      | PREDICTED: uncharacterized protein LOC105170911 [Sesamum indicum]                                 |

| #ID             | 0 h-1<br>FPKM | 0 h-2<br>FPKM | 0 h-3<br>FPKM | 28 h-1<br>FPKM | 28 h-2<br>FPKM | 28 h-3<br>FPKM | FDR       | log2FC   | regulated | nr_annotation                                                                                             |
|-----------------|---------------|---------------|---------------|----------------|----------------|----------------|-----------|----------|-----------|-----------------------------------------------------------------------------------------------------------|
| c48814.graph_c0 | 2.37542317    | 2.48788521    | 2.26112061    | 1.59855914     | 1.42891553     | 1.48702877     | 9.774E-16 | -1.74796 | down      | PREDICTED: molybdopterin biosynthesis protein CNX1 [Sesamum indicum]                                      |
| c48816.graph_c0 | 4.9534952     | 5.07988694    | 4.57272241    | 26.6118819     | 25.5538343     | 25.4801443     | 7.334E-38 | 1.32084  | up        | PREDICTED: uncharacterized protein LOC105176358 [Sesamum indicum]                                         |
| c48816.graph_c1 | 20.7865124    | 20.5770937    | 21.3913603    | 23.5284434     | 21.1307778     | 21.2791954     | 4.877E-28 | -1.01971 | down      | PREDICTED: serrate RNA effector molecule-like [Sesamum indicum]                                           |
| c48816.graph_c2 | 11.1626754    | 10.7440896    | 11.2312548    | 49.4913346     | 48.8115188     | 46.4135589     | 1.09E-36  | 1.03566  | up        | PREDICTED: endoglucanase 6 [Sesamum indicum]                                                              |
| c48824.graph_c4 | 4.30109086    | 6.25307768    | 5.85606442    | 5.91708666     | 5.14096789     | 6.43772586     | 0.0005398 | -1.00002 | down      | PREDICTED: UDP-N-acetylglucosamine diphosphorylase 1 [Vitis vinifera]                                     |
| c48824.graph_c6 | 26.8584881    | 27.3032903    | 25.6323227    | 26.8703173     | 28.0969274     | 27.730699      | 4.005E-26 | -1.03831 | down      | PREDICTED: hippocampus abundant transcript 1 protein-like isoform X1 [Sesamum indicum]                    |
| c48828.graph_c1 | 78.5264157    | 82.2280246    | 74.9812531    | 54.8230792     | 55.2603138     | 53.6922522     | 1.823E-86 | -1.61538 | down      | PREDICTED: LOW QUALITY PROTEIN: B3 domain-containing transcription repressor VAL1 [Sesamum indicum]       |
| c48832.graph_c0 | 34.3337096    | 34.6522615    | 32.0600891    | 281.467703     | 254.577287     | 245.719246     | 3.362E-74 | 1.86179  | up        | PREDICTED: aconitate hydratase, cytoplasmic [Sesamum indicum]                                             |
| c48832.graph_c2 | 207.492414    | 196.034086    | 211.442555    | 55.6511371     | 59.5634886     | 62.7010258     | 1.05E-172 | -2.87994 | down      | PREDICTED: (+)-neomenthol dehydrogenase-like isoform X1 [Sesamum indicum]                                 |
| c48837.graph_c0 | 39.2241732    | 34.1421307    | 41.024974     | 31.2347459     | 29.947888      | 32.7693826     | 1.563E-17 | -1.37518 | down      | -                                                                                                         |
| c48837.graph_c5 | 4.68802065    | 4.3493456     | 4.16312871    | 38.7814386     | 39.8682205     | 38.4490847     | 7.578E-65 | 2.05975  | up        | PREDICTED: 3-ketoacyl-CoA synthase 1 [Sesamum indicum]                                                    |
| c48837.graph_c6 | 1.3376508     | 0.77520489    | 1.1761129     | 5.93551787     | 7.02242114     | 6.22117916     | 2.002E-05 | 1.45339  | up        | -                                                                                                         |
| c48837.graph_c8 | 0.32542795    | 0.21716921    | 0.13939594    | 2.6805505      | 3.84398329     | 3.28096098     | 2.191E-07 | 2.7645   | up        | TPA: hypothetical protein ZEAMMB73_870894 [Zea mays]                                                      |
| c48837.graph_c9 | 32.7406247    | 31.6624465    | 28.1080912    | 19.023114      | 18.3292533     | 19.1154167     | 4.052E-75 | -1.80069 | down      | PREDICTED: probable WRKY transcription factor 33-like [Cicer arietinum]                                   |
| c48839.graph_c1 | 1.27716826    | 1.30303267    | 1.19934707    | 9.44304197     | 8.12324289     | 8.34635172     | 4.949E-19 | 1.6876   | up        | hypothetical protein MIMGU_mgv1a005851mg [Erythranthe ontaria]                                            |
| c48847.graph_c0 | 15.1463903    | 15.3393309    | 14.8993569    | 5.27366237     | 5.61072321     | 5.38660497     | 3.24E-124 | -2.57031 | down      | PREDICTED: uncharacterized protein LOC105164002 isoform X1 [Sesamum indicum]                              |
| c48847.graph_c1 | 1.34141809    | 1.31693899    | 1.65747631    | 0              | 0              | 0.0611953      | 4.482E-46 | -7.21927 | down      | PREDICTED: ABC transporter B family member 19-like [Sesamum indicum]                                      |
| c48848.graph_c1 | 1.02487585    | 1.44386223    | 1.21945005    | 1.43457189     | 1.32019322     | 1.17059894     | 0.0035115 | -1.00243 | down      | PREDICTED: O-acyltransferase WSD1-like [Nicotiana tomentosiformis]                                        |
| c48848.graph_c2 | 0.40972361    | 0.31363179    | 0.46456858    | 10.947969      | 11.8461715     | 11.020308      | 1.459E-66 | 3.73777  | up        | PREDICTED: probable inactive leucine-rich repeat receptor-like protein kinase At1g66830 [Sesamum indicum] |
| c48848.graph_c3 | 54.7236139    | 56.2630125    | 52.9959838    | 47.2447543     | 48.6188066     | 47.0472201     | 2.263E-57 | -1.28859 | down      | PREDICTED: myb-related protein 3R-1-like isoform X1 [Sesamum indicum]                                     |
| c48848.graph_c4 | 34.794188     | 34.006121     | 33.6338626    | 23.1727899     | 22.2205111     | 22.8750449     | 1.158E-88 | -1.6755  | down      | PREDICTED: protein STRUBBELIG-RECEPTOR FAMILY 3-like [Sesamum indicum]                                    |
| c48849.graph_c1 | 244.99828     | 253.804355    | 247.589247    | 119.256714     | 116.48589      | 116.259216     | 1.32E-139 | -2.17498 | down      | PREDICTED: probable inactive receptor kinase At5g10020 [Sesamum indicum]                                  |



| #ID             | 0 h-1<br>FPKM | 0 h-2<br>FPKM | 0 h-3<br>FPKM | 28 h-1<br>FPKM | 28 h-2<br>FPKM | 28 h-3<br>FPKM | FDR       | log2FC   | regulated | nr_annotation                                                                                    |
|-----------------|---------------|---------------|---------------|----------------|----------------|----------------|-----------|----------|-----------|--------------------------------------------------------------------------------------------------|
| c48850.graph_c0 | 0.16351582    | 0             | 0             | 2.07974127     | 3.48736398     | 6.64274598     | 0.0007631 | 5.16782  | up        | -                                                                                                |
| c48861.graph_c0 | 12.0432512    | 11.6298291    | 10.8514453    | 11.986414      | 10.822608      | 11.8478956     | 1.358E-33 | -1.08347 | down      | PREDICTED: phospholipase A I [Sesamum indicum]                                                   |
| c48861.graph_c1 | 5.48297191    | 5.3085127     | 4.62022032    | 5.68351373     | 4.12893795     | 4.6910077      | 1.503E-05 | -1.17595 | down      | PREDICTED: phospholipase A I [Sesamum indicum]                                                   |
| c48863.graph_c0 | 60.8142887    | 33.5626899    | 40.4483079    | 0              | 0              | 0              | 3.414E-36 | -Inf     | down      | predicted protein [Hordeum vulgare subsp. vulgare]                                               |
| c48864.graph_c0 | 4.18595266    | 3.89570169    | 3.79445672    | 22.2500943     | 20.7133775     | 20.4706712     | 6.942E-47 | 1.32759  | up        | PREDICTED: probable splicing factor 3B subunit 3 isoform X1 [Sesamum indicum]                    |
| c48865.graph_c3 | 73.1994211    | 78.8623462    | 71.667927     | 70.0900975     | 68.9862211     | 67.6010145     | 1.579E-49 | -1.20455 | down      | PREDICTED: enhancer of mRNA-decapping protein 4-like [Sesamum indicum]                           |
| c48866.graph_c0 | 14.3838429    | 14.1116041    | 12.6810808    | 58.6261755     | 61.4768011     | 58.315395      | 9.014E-34 | 1.02624  | up        | hypothetical protein MIMGU_mgv1a0055 / 1 mg [Erythranthe outafata]                               |
| c48869.graph_c0 | 101.644942    | 102.615364    | 98.1677696    | 36.0755344     | 36.2742825     | 36.7109037     | 3.13E-210 | -2.56145 | down      | PREDICTED: uncharacterized protein LOC105165944 [Sesamum indicum]                                |
| c48870.graph_c0 | 226.363051    | 235.333954    | 204.303126    | 150.49657      | 172.223122     | 164.849842     | 6.436E-70 | -1.53903 | down      | PREDICTED: DNA repair helicase XPB1-like [Sesamum indicum]                                       |
| c48871.graph_c0 | 6.586903      | 4.34890346    | 6.24326836    | 28.2486018     | 28.7247248     | 28.2037737     | 5.482E-20 | 1.21885  | up        | hypothetical protein MIMGU_mgv1a012 / 4 / mg [Erythranthe outafata]                              |
| c48872.graph_c0 | 5.22314178    | 4.48146169    | 4.83990518    | 0              | 0.09326713     | 0.08428917     | 2.25E-104 | -7.44437 | down      | -                                                                                                |
| c48872.graph_c1 | 119.354218    | 127.462319    | 112.999087    | 110.140299     | 110.036906     | 114.660253     | 4.325E-49 | -1.19324 | down      | PREDICTED: FAC1 complex subunit SP116-like [Sesamum indicum]                                     |
| c48872.graph_c2 | 0.47902338    | 0.2950788     | 0.37880862    | 3.52168561     | 3.01048756     | 3.21238787     | 6.392E-13 | 1.99091  | up        | PREDICTED: putative late blight resistance protein homolog R1A-10 [Sesamum indicum]              |
| c48879.graph_c1 | 1.17368585    | 1.07487294    | 1.37987255    | 11.9060945     | 11.4055801     | 11.6553691     | 8.516E-36 | 2.17555  | up        | PREDICTED: multisubstrate pseudouridine synthase 7 isoform X2 [Sesamum indicum]                  |
| c48887.graph_c2 | 37.0780082    | 37.0570531    | 35.0453099    | 173.496733     | 176.375484     | 174.229124     | 6.368E-45 | 1.17329  | up        | hypothetical protein MIMGU_mgv1a000942 mg [Erythranthe outafata]                                 |
| c48889.graph_c0 | 1.44584185    | 0.692182      | 0.76741992    | 0              | 0              | 0              | 4.082E-12 | -Inf     | down      | PREDICTED: granule-bound starch synthase 1b, chloroplastic/amyloplastic-like [Elaeis guineensis] |
| c48892.graph_c0 | 0             | 0             | 0             | 1.11777666     | 2.10259901     | 2.54626975     | 1.561E-06 | Inf      | up        | predicted protein [Micromonas sp. RCC299]                                                        |
| c48893.graph_c0 | 5.81286319    | 4.52564303    | 5.60231951    | 3.87269251     | 2.43707877     | 1.72368298     | 9.429E-09 | -2.08145 | down      | PREDICTED: calcium-dependent protein kinase 20-like [Malus domestica]                            |
| c48895.graph_c0 | 61.2924419    | 60.7836143    | 62.2200115    | 41.9594591     | 43.1935334     | 40.7248183     | 5.368E-89 | -1.64102 | down      | neutral/alkaline invertase 1 [Orobancha ramosa]                                                  |
| c48896.graph_c0 | 1.52905525    | 1.1704484     | 1.04023934    | 7.51767545     | 7.02385195     | 9.28155608     | 8.79E-06  | 1.58648  | up        | PREDICTED: N-acetyl-D-glucosamine kinase-like isoform X1 [Sesamum indicum]                       |
| c48898.graph_c0 | 0             | 0             | 0             | 1.13299039     | 0.884743       | 1.9989425      | 1.122E-05 | Inf      | up        | hypothetical protein EUGRSUZ_K01803 [Eucalyptus grandis]                                         |
| c48899.graph_c0 | 1.95226345    | 1.60815884    | 2.14287851    | 0.50252489     | 0.44038778     | 0.39799573     | 6.641E-26 | -3.18168 | down      | PREDICTED: phosphate transporter PHO1 homolog 9-like [Sesamum indicum]                           |
| c48900.graph_c0 | 5.32465352    | 2.43914584    | 2.9573044     | 0              | 0              | 0              | 2.819E-17 | -Inf     | down      | --                                                                                               |
| c48903.graph_c0 | 54.4673358    | 53.2023733    | 52.5114514    | 12.2630151     | 13.3214246     | 14.1967506     | 5.14E-226 | -3.09924 | down      | PREDICTED: phosphoenolpyruvate carboxylase kinase 2 [Sesamum indicum]                            |

| #ID             | 0 h-1<br>FPKM | 0 h-2<br>FPKM | 0 h-3<br>FPKM | 28 h-1<br>FPKM | 28 h-2<br>FPKM | 28 h-3<br>FPKM | FDR       | log2FC   | regulated | nr_annotation                                                                      |
|-----------------|---------------|---------------|---------------|----------------|----------------|----------------|-----------|----------|-----------|------------------------------------------------------------------------------------|
| c48903.graph_c1 | 50.9896189    | 55.0331229    | 45.2233981    | 37.684189      | 39.41391       | 37.1968211     | 3.887E-36 | -1.49313 | down      | hypothetical protein MIMGU_mgv1a0000982mg, partial [Erythranthe guttata]           |
| c48903.graph_c2 | 53.4103412    | 52.3878221    | 53.5693674    | 28.8085706     | 28.1717102     | 30.0020194     | 1.74E-118 | -1.96394 | down      | PREDICTED: suppressor of mec-8 and unc-52 protein homolog 2 [Sesamum indicum]      |
| c48904.graph_c0 | 0             | 0             | 0             | 1.5483212      | 1.13989862     | 2.7795184      | 2.107E-06 | Inf      | up        | PREDICTED: cytochrome P450 6k1-like [Pyrus x bretschneideri]                       |
| c48909.graph_c1 | 17.5864922    | 16.6317828    | 16.7524168    | 14.1565436     | 13.5536503     | 12.9766275     | 1.553E-30 | -1.41544 | down      | hypothetical protein MIMGU_mgv1a025565mg [Erythranthe guttata]                     |
| c48914.graph_c1 | 34.865895     | 34.5033867    | 34.6466143    | 5.69239332     | 6.19763825     | 6.28601818     | 0         | -3.60699 | down      | hypothetical protein MIMGU_mgv1a000556mg [Erythranthe guttata]                     |
| c48915.graph_c1 | 6.56614996    | 6.36007798    | 4.74003726    | 35.3847556     | 32.8489133     | 32.5616217     | 2.171E-42 | 1.42571  | up        | PREDICTED: vacuolar protein sorting-associated protein 8 homolog [Sesamum indicum] |
| c48920.graph_c0 | 7.31708244    | 7.25690332    | 6.71624331    | 30.3641407     | 30.8014796     | 29.6162836     | 4.696E-19 | 1.00261  | up        | PREDICTED: cell division cycle protein 27 homolog B [Sesamum indicum]              |
| c48922.graph_c1 | 0             | 0             | 0             | 1.72940355     | 2.80267303     | 2.74999019     | 4.924E-12 | Inf      | up        | -                                                                                  |
| c48927.graph_c0 | 39.5444731    | 38.8384806    | 37.9816391    | 28.4700208     | 28.9939638     | 28.8132428     | 5.025E-69 | -1.52167 | down      | PREDICTED: coiled-coil domain-containing protein 130-like [Sesamum indicum]        |
| c48936.graph_c0 | 101.326145    | 95.5542945    | 103.122502    | 93.554821      | 94.7191441     | 97.24513       | 6.127E-46 | -1.1622  | down      | carotenoid cleavage dioxygenase 1 [Ipomoea sp. Kenyan]                             |
| c48938.graph_c0 | 3.07291205    | 3.54204806    | 4.54711875    | 22.9428499     | 17.6598969     | 18.168931      | 1.392E-07 | 1.30076  | up        | cytochrome b, partial (mitochondrion) [Erythranthe guttata]                        |
| c48942.graph_c0 | 16.3103917    | 16.7348922    | 16.567985     | 93.2538164     | 89.2325617     | 90.0396101     | 1.636E-65 | 1.36689  | up        | PREDICTED: neparanase-like protein 2 isoform X1 [Sesamum indicum]                  |
| c48943.graph_c0 | 389.230273    | 381.899263    | 396.053806    | 322.165551     | 309.127581     | 320.775063     | 3.163E-40 | -1.38462 | down      | PREDICTED: DNA mismatch repair protein msh2 isoform X2 [Sesamum indicum]           |
| c48950.graph_c0 | 245.361664    | 237.41112     | 250.336273    | 177.169736     | 173.905001     | 176.555563     | 1.287E-72 | -1.56537 | down      | PREDICTED: methyl-CpG-binding domain-containing protein 11 [Sesamum indicum]       |
| c48950.graph_c2 | 0.5818557     | 0.47323115    | 0.37385381    | 3.93815725     | 3.91375187     | 4.24872697     | 5.922E-09 | 1.99709  | up        | hypothetical protein MIMGU_mgv1a004080mg [Erythranthe guttata]                     |
| c48950.graph_c3 | 9.2544081     | 10.5071213    | 10.9345132    | 5.8232249      | 5.42085947     | 4.34651991     | 2.62E-29  | -2.07087 | down      | -                                                                                  |
| c48952.graph_c2 | 4.05129797    | 4.06505654    | 3.6118725     | 4.21945347     | 3.79069021     | 3.56949512     | 5.973E-24 | -1.10787 | down      | PREDICTED: protein RST1 [Sesamum indicum]                                          |
| c48953.graph_c1 | 0             | 0             | 0             | 1.60828918     | 1.13645296     | 1.85440879     | 7.11E-12  | Inf      | up        | PREDICTED: protein ECERIFERUM 1-like [Sesamum indicum]                             |
| c48956.graph_c2 | 31.8432848    | 30.8904097    | 33.3347329    | 16.8402006     | 16.0036035     | 15.6146046     | 9.881E-97 | -2.07877 | down      | PREDICTED: DEAD-box ATP-dependent RNA helicase 13 [Sesamum indicum]                |
| c48956.graph_c3 | 64.2968181    | 58.1402709    | 58.0125655    | 20.4819036     | 22.2637048     | 20.9550787     | 1.76E-195 | -2.59184 | down      | PREDICTED: spermatogenesis-associated protein 5 [Sesamum indicum]                  |
| c48957.graph_c2 | 74.5098353    | 81.0202516    | 69.7018076    | 616.140028     | 617.11856      | 611.33848      | 4.09E-118 | 1.94434  | up        | PREDICTED: uncharacterized protein LOC105169334 [Sesamum indicum]                  |
| c48958.graph_c0 | 1.30096611    | 1.16020314    | 1.55020802    | 0.80800236     | 0.80716211     | 0.9539146      | 7.116E-09 | -1.73538 | down      | PREDICTED: probable plastidic glucose transporter 2 [Sesamum indicum]              |
| c48960.graph_c0 | 0.49217669    | 0.4187691     | 0.98032313    | 3.75596743     | 4.21488456     | 4.15942402     | 5.547E-09 | 1.58007  | up        | PREDICTED: uncharacterized protein LOC105166139 [Sesamum indicum]                  |
| c48965.graph_c0 | 0             | 0.14476592    | 0.05068469    | 0.65932503     | 0.53491505     | 0.56919247     | 7.454E-05 | 2.07907  | up        | hypothetical protein VITISV_029627 [Vitis vinifera]                                |

| #ID             | 0 h-1<br>FPKM | 0 h-2<br>FPKM | 0 h-3<br>FPKM | 28 h-1<br>FPKM | 28 h-2<br>FPKM | 28 h-3<br>FPKM | FDR       | log2FC   | regulated | nr_annotation                                                                                  |
|-----------------|---------------|---------------|---------------|----------------|----------------|----------------|-----------|----------|-----------|------------------------------------------------------------------------------------------------|
| c48967.graph_c0 | 0             | 0             | 0             | 1.359078       | 1.57224751     | 1.24762112     | 5.951E-12 | Inf      | up        | PREDICTED: FAS-associated factor 2-like [Sesamum indicum]                                      |
| c48967.graph_c3 | 47.4255923    | 46.8446461    | 45.8170711    | 46.3320977     | 45.369736      | 45.1290268     | 2.762E-43 | -1.12411 | down      | PREDICTED: mitochondrial carnitine/acylcarnitine carrier-like protein [Sesamum indicum]        |
| c48969.graph_c0 | 337.103831    | 309.66971     | 324.247717    | 295.490344     | 314.278577     | 295.494583     | 1.273E-45 | -1.19164 | down      | putative aldo/keto reductase 2 [Salvia miltiorrhiza]                                           |
| c48971.graph_c0 | 14.8837985    | 14.3502839    | 12.5161687    | 75.9213072     | 76.5393118     | 76.4642022     | 5.63E-55  | 1.36664  | up        | PREDICTED: LOW QUALITY PROTEIN: T-complex protein 1 subunit beta-like [Sesamum indicum]        |
| c48978.graph_c0 | 26.86928      | 23.5513447    | 25.3519696    | 16.9002494     | 17.2718915     | 16.5865638     | 1.852E-57 | -1.66832 | down      | PREDICTED: LOW QUALITY PROTEIN: ADP-ribosylation factor-binding protein GGA3 [Sesamum indicum] |
| c48979.graph_c0 | 8854.65546    | 8951.01217    | 8042.78709    | 4278.56395     | 4314.16447     | 4494.00888     | 4.695E-60 | -2.07102 | down      | hypothetical protein PHAVU_005G123000g, partial [Phaseolus vulgaris]                           |
| c48981.graph_c0 | 55.7266216    | 55.5421113    | 59.2322916    | 35.6817039     | 32.8080137     | 35.8432651     | 8.552E-73 | -1.79967 | down      | hypothetical protein MIMGU_mgv1a010195mg [Erythranthe outtata]                                 |
| c48983.graph_c0 | 70.7943042    | 70.8280431    | 67.6041484    | 22.8199983     | 25.2195889     | 25.7193373     | 2.05E-214 | -2.59387 | down      | PREDICTED: protein SPA1-RELATED 4-like isoform X6 [Sesamum indicum]                            |
| c48984.graph_c0 | 204.912448    | 194.785218    | 204.100268    | 150.722601     | 147.697055     | 147.289289     | 1.591E-74 | -1.52865 | down      | PREDICTED: uncharacterized protein LOC105157959 [Sesamum indicum]                              |
| c48986.graph_c0 | 13.0754007    | 12.2623098    | 13.7322002    | 1.54702049     | 0.99772461     | 1.05625714     | 6.66E-153 | -4.53145 | down      | anion exchange family protein [Populus trichocarpa]                                            |
| c48988.graph_c0 | 0             | 0             | 0             | 3.01184858     | 5.3551594      | 6.95702259     | 3.966E-09 | Inf      | up        | -                                                                                              |
| c48990.graph_c0 | 1.30586357    | 1.20584009    | 1.27482532    | 21.652589      | 20.6264187     | 20.6700918     | 3.39E-175 | 2.96472  | up        | PREDICTED: alpha-glucan water dikinase, chloroplastic-like [Sesamum indicum]                   |
| c48992.graph_c0 | 1.75179028    | 1.98735035    | 1.50074657    | 9.29429485     | 9.50312992     | 10.215983      | 1.752E-07 | 1.38127  | up        | Papain family cysteine protease [Arabidopsis thaliana]                                         |
| c48992.graph_c1 | 1.87943482    | 1.99069568    | 1.57265462    | 68.6475522     | 69.0668146     | 60.8371963     | 4.53E-204 | 4.10033  | up        | PREDICTED: subtilisin-like protease [Sesamum indicum]                                          |
| c48995.graph_c0 | 16.5619278    | 18.2268536    | 13.4288755    | 16.6402164     | 17.0195169     | 16.2451076     | 3.475E-09 | -1.0382  | down      | PREDICTED: proline-rich receptor-like protein kinase PERK9 isoform X1 [Sesamum indicum]        |
| c48999.graph_c0 | 1.32657046    | 0.51073032    | 0.52452171    | 6.82317127     | 5.55800832     | 4.23625699     | 0.000459  | 1.73331  | up        | PREDICTED: uncharacterized protein LOC100792645 [Glycine max]                                  |
| c49001.graph_c2 | 8.36795122    | 8.6936157     | 9.28681017    | 3.54770425     | 4.28485927     | 4.21076029     | 1.478E-27 | -2.22114 | down      | PREDICTED: uncharacterized protein LOC105156426 [Sesamum indicum]                              |
| c49003.graph_c1 | 2.80076841    | 4.15344142    | 3.15476517    | 0.57800486     | 0.58995605     | 0.86126889     | 7.863E-17 | -3.40545 | down      | hypothetical protein MIMGU_mgv1a000068mg [Erythranthe outtata]                                 |
| c49008.graph_c0 | 44.787024     | 41.1119165    | 50.6368468    | 1.95585113     | 1.97618236     | 1.63395756     | 5.901E-86 | -5.70987 | down      | PREDICTED: uncharacterized protein LOC105161665 [Sesamum indicum]                              |
| c49013.graph_c0 | 64.9923843    | 66.5123608    | 57.117181     | 53.645581      | 49.7644988     | 50.4255421     | 1.035E-55 | -1.38296 | down      | PREDICTED: probable histone-lysine N-methyltransferase ATXR3 isoform X2 [Sesamum indicum]      |
| c49015.graph_c1 | 56.4582066    | 56.6532574    | 55.6580211    | 45.5927768     | 41.6503087     | 43.0573875     | 1.885E-65 | -1.46354 | down      | PREDICTED: E3 ubiquitin-protein ligase SINAT5 isoform X1 [Vitis vinifera]                      |
| c49015.graph_c3 | 47.2820439    | 49.031176     | 44.4217278    | 30.7470205     | 30.7528882     | 29.0054138     | 2.317E-98 | -1.72681 | down      | PREDICTED: AP-5 complex subunit mu [Sesamum indicum]                                           |
| c49018.graph_c1 | 4.21720788    | 4.24814869    | 3.77291582    | 30.1266507     | 30.0915952     | 30.6299423     | 2.72E-57  | 1.80307  | up        | hypothetical protein MIMGU_mgv1a008196mg [Erythranthe outtata]                                 |

| #ID             | 0 h-1<br>FPKM | 0 h-2<br>FPKM | 0 h-3<br>FPKM | 28 h-1<br>FPKM | 28 h-2<br>FPKM | 28 h-3<br>FPKM | FDR       | log2FC   | regulated | nr_annotation                                                                                                   |
|-----------------|---------------|---------------|---------------|----------------|----------------|----------------|-----------|----------|-----------|-----------------------------------------------------------------------------------------------------------------|
| c49020.graph_c0 | 1.54733418    | 1.67116388    | 1.72675599    | 0              | 0              | 0              | 7.303E-41 | -Inf     | down      | -                                                                                                               |
| c49020.graph_c1 | 37.2319069    | 35.4916125    | 34.2295677    | 23.9275956     | 22.3768955     | 21.7138582     | 5.48E-99  | -1.74279 | down      | PREDICTED: uncharacterized protein LOC105161915 [Sesamum indicum]                                               |
| c49022.graph_c0 | 8.69725988    | 8.56832509    | 9.67436679    | 72.7553227     | 65.3077353     | 65.0354121     | 1.873E-66 | 1.82213  | up        | PREDICTED: uncharacterized protein LOC105176567 [Sesamum indicum]                                               |
| c49023.graph_c0 | 17.8032157    | 16.0876892    | 14.9505622    | 6.68594733     | 6.14331505     | 7.83050315     | 1.308E-62 | -2.32874 | down      | PREDICTED: DNA polymerase zeta catalytic subunit [Sesamum indicum]                                              |
| c49023.graph_c1 | 36.0681975    | 35.9791453    | 30.405413     | 18.3175973     | 16.6758349     | 18.1110957     | 1.264E-65 | -2.03614 | down      | PREDICTED: DNA polymerase zeta catalytic subunit [Sesamum indicum]                                              |
| c49028.graph_c0 | 14.909801     | 8.67079527    | 10.043641     | 0              | 0              | 0              | 1.425E-45 | -Inf     | down      | alpha-2 macroglobulin family-like protein [Micromonas sp. RCC9091]                                              |
| c49030.graph_c2 | 2432.47793    | 2372.10496    | 2596.92043    | 589.918193     | 636.893527     | 681.800808     | 4.259E-89 | -3.04636 | down      | PREDICTED: probable xyloglucan endotransglucosylase/hydrolase protein 28 [Sesamum indicum]                      |
| c49032.graph_c0 | 17.067669     | 17.748962     | 18.142975     | 109.873881     | 116.671454     | 110.993532     | 6.894E-78 | 1.58069  | up        | PREDICTED: tyrosine--tRNA ligase, cytoplasmic-like [Sesamum indicum]                                            |
| c49034.graph_c1 | 8.22911111    | 7.20409471    | 7.81130146    | 35.8435446     | 33.5299464     | 35.3357131     | 8.426E-27 | 1.08136  | up        | PREDICTED: probable NOT transcription complex subunit VIP2 isoform X1 [Sesamum indicum]                         |
| c49035.graph_c1 | 11.325483     | 12.1186736    | 12.2117203    | 3.21682822     | 1.70852605     | 1.46685899     | 3.944E-38 | -3.57271 | down      | PREDICTED: histone-lysine N-methyltransferase, H3 lysine-9 specific SUVH5-like isoform X1 [Sesamum indicum]     |
| c49038.graph_c0 | 5.50031078    | 4.87053175    | 2.44665592    | 2.7675652      | 3.74827783     | 2.7601574      | 0.0028718 | -1.54899 | down      | -                                                                                                               |
| c49038.graph_c1 | 28.0918035    | 25.9105099    | 26.0429075    | 18.9099947     | 21.4631431     | 16.3030718     | 1.174E-42 | -1.58895 | down      | PREDICTED: E3 ubiquitin-protein ligase RING1-like [Sesamum indicum]                                             |
| c49038.graph_c2 | 1.16361174    | 0.98829557    | 1.08748157    | 29.779113      | 30.9139673     | 28.6282559     | 5.43E-115 | 3.69481  | up        | ATP-citrate synthase [Camellia sinensis]                                                                        |
| c49038.graph_c3 | 68.0801967    | 67.4513608    | 61.9436516    | 71.0344722     | 67.0244852     | 66.7481804     | 1.848E-38 | -1.03684 | down      | PREDICTED: probable monodehydroascorbate reductase, cytoplasmic isoform 2 [Sesamum indicum]                     |
| c49043.graph_c0 | 0.59751195    | 0.76558114    | 0.98281793    | 0.66008773     | 0.65873389     | 0.63784681     | 0.0009035 | -1.35841 | down      | Cytochrome c biogenesis [Medicago truncatula]                                                                   |
| c49045.graph_c1 | 8.4857651     | 8.25924319    | 8.49089008    | 34.4204589     | 36.7790971     | 37.495498      | 1.411E-22 | 1.01629  | up        | hypothetical protein MIMGU_mgv1a008892mg [Erythranthe outtata]                                                  |
| c49047.graph_c0 | 0.25494122    | 0.55292576    | 0.49141434    | 4.63224522     | 4.76803076     | 4.96423488     | 1.439E-11 | 2.37114  | up        | PREDICTED: uncharacterized protein LOC105176173 [Sesamum indicum]                                               |
| c49051.graph_c3 | 6.38798023    | 6.80741073    | 5.57727591    | 3.77639725     | 5.04439859     | 5.20231279     | 4.675E-24 | -1.50888 | down      | alcohol dehydrogenase class III [Solanum lycopersicum]                                                          |
| c49059.graph_c1 | 20.3157567    | 17.4309427    | 18.6475369    | 125.622872     | 142.099516     | 138.461269     | 2.138E-44 | 1.75875  | up        | PREDICTED: 60S ribosomal protein L52a-5-like [Sesamum indicum]                                                  |
| c49059.graph_c5 | 23.1102402    | 21.1041376    | 19.2773724    | 104.756429     | 119.329049     | 119.263779     | 4.159E-21 | 1.34682  | up        | unknown [Glycine max]                                                                                           |
| c49060.graph_c2 | 1.43217298    | 0.86016425    | 1.04289276    | 4.92690334     | 5.51367318     | 5.18110745     | 0.0002059 | 1.14018  | up        | PREDICTED: probable serine/threonine-protein kinase DDB_G0291350 [Sesamum indicum]                              |
| c49060.graph_c3 | 21.159166     | 20.9125305    | 21.3740917    | 106.400749     | 103.210033     | 102.240147     | 5.059E-52 | 1.20645  | up        | PREDICTED: 1,4-alpha-glucan-branching enzyme 2-2, chloroplastic/amyloplastic-like isoform X1 [Nicotiana glauca] |

| #ID             | 0 h-1<br>FPKM | 0 h-2<br>FPKM | 0 h-3<br>FPKM | 28 h-1<br>FPKM | 28 h-2<br>FPKM | 28 h-3<br>FPKM | FDR       | log2FC   | regulated | nr_annotation                                                                                          |
|-----------------|---------------|---------------|---------------|----------------|----------------|----------------|-----------|----------|-----------|--------------------------------------------------------------------------------------------------------|
| c49060.graph_c5 | 6.59052495    | 5.15573585    | 5.26649014    | 5.11196937     | 5.05175148     | 5.55081865     | 1.208E-08 | -1.20224 | down      | PREDICTED: uncharacterized protein At1g15400-like [Sesamum indicum]                                    |
| c49071.graph_c0 | 15.0950327    | 15.5104169    | 16.0577108    | 72.849263      | 79.9458956     | 71.9735765     | 6.64E-42  | 1.17642  | up        | hypothetical protein MIMGU_mgv1a005383mg [Erythranthe cuttata]                                         |
| c49074.graph_c0 | 4.37574243    | 5.82016487    | 4.6216457     | 0.1306958      | 0.2360121      | 0.24884231     | 1.408E-48 | -5.67857 | down      | PREDICTED: uncharacterized protein LOC105167219 [Sesamum indicum]                                      |
| c49075.graph_c0 | 5.39123566    | 4.22979434    | 5.49242983    | 2.8240137      | 2.42232861     | 2.33317677     | 1.273E-17 | -2.08756 | down      | -                                                                                                      |
| c49078.graph_c2 | 3.37595104    | 2.93854917    | 3.96099329    | 2.84477885     | 2.69699701     | 4.41050099     | 0.0002761 | -1.13691 | down      | WRKY transcription factor [Medicago truncatula]                                                        |
| c49078.graph_c3 | 4.64072708    | 4.54992117    | 5.39167384    | 31.2104475     | 32.4978594     | 32.4988296     | 2.139E-46 | 1.62931  | up        | hypothetical protein EUGRSUZ_H01869 [Eucalyptus grandis]                                               |
| c49080.graph_c1 | 211.977807    | 213.744404    | 211.812821    | 91.3441969     | 98.223046      | 91.502783      | 8.71E-165 | -2.27232 | down      | hypothetical protein MIMGU_mgv1a009220mg [Erythranthe cuttata]                                         |
| c49084.graph_c0 | 0.14016878    | 0.28061827    | 0.36024486    | 1.73185563     | 2.16158979     | 1.78725712     | 0.0001403 | 1.76176  | up        | PREDICTED: uncharacterized protein LOC105173906 [Sesamum indicum]                                      |
| c49085.graph_c0 | 101.41198     | 97.0057601    | 98.2855975    | 56.0008256     | 53.7746143     | 51.9418566     | 6.95E-128 | -1.96603 | down      | -                                                                                                      |
| c49085.graph_c1 | 33.6047021    | 30.5007184    | 32.6919676    | 10.8078863     | 10.1890304     | 9.81346254     | 2.49E-110 | -2.74227 | down      | PREDICTED: cellulose synthase A catalytic subunit 2 [UDP-forming]-like [Nicotiana glauca]              |
| c49085.graph_c3 | 7.17812944    | 7.06071638    | 6.9847841     | 5.80506907     | 6.58923017     | 5.42589098     | 1.758E-28 | -1.34314 | down      | PREDICTED: leucine-rich repeat receptor-like protein kinase PXL2 [Sesamum indicum]                     |
| c49086.graph_c0 | 4.32450516    | 3.39287107    | 5.05651527    | 4.16238503     | 3.57927945     | 4.04341928     | 0.000134  | -1.20939 | down      | PREDICTED: uncharacterized protein LOC105159651 [Sesamum indicum]                                      |
| c49094.graph_c0 | 88.2778485    | 84.7222765    | 79.1623751    | 47.6237925     | 45.512261      | 48.7432849     | 3.67E-123 | -1.91865 | down      | PREDICTED: uridine-cytidine kinase C-like isoform X1 [Sesamum indicum]                                 |
| c49097.graph_c1 | 11.4378988    | 11.6163219    | 11.8503857    | 4.86656814     | 4.47224077     | 4.91792097     | 6.749E-95 | -2.38243 | down      | PREDICTED: probable galacturonosyltransferase 14 [Sesamum indicum]                                     |
| c49099.graph_c0 | 131.282506    | 133.492378    | 116.369645    | 70.8467057     | 71.6890247     | 66.1707963     | 8.82E-119 | -1.95815 | down      | PREDICTED: uncharacterized protein LOC105161154 isoform X1 [Sesamum indicum]                           |
| c49103.graph_c5 | 16.4305875    | 17.1247313    | 14.1540462    | 117.069867     | 118.228232     | 108.268218     | 1.1E-100  | 1.75934  | up        | PREDICTED: V-type proton ATPase catalytic subunit A [Sesamum indicum]                                  |
| c49112.graph_c0 | 358.668528    | 352.973443    | 347.767126    | 134.880036     | 130.171304     | 134.763402     | 2.04E-168 | -2.49593 | down      | PREDICTED: THO complex subunit 4D [Solanum lycopersicum]                                               |
| c49114.graph_c0 | 5.4511327     | 5.00628997    | 5.44071561    | 32.5025709     | 31.6389481     | 31.0101425     | 6.894E-45 | 1.49046  | up        | PREDICTED: signal recognition particle subunit SRP68 [Sesamum indicum]                                 |
| c49115.graph_c1 | 0.46621198    | 0.46667882    | 0.68468669    | 6.29274619     | 5.33211305     | 5.45081901     | 2.841E-09 | 2.30392  | up        | ALA-interacting subunit 5 [Arabidopsis thaliana]                                                       |
| c49119.graph_c0 | 43.201845     | 43.689934     | 45.0633665    | 39.051971      | 39.2161129     | 37.4578376     | 1.186E-55 | -1.28063 | down      | PREDICTED: pentatricopeptide repeat-containing protein At1g62680, mitochondrial-like [Sesamum indicum] |
| c49119.graph_c2 | 29.3052442    | 27.2294973    | 26.5328515    | 26.7377398     | 28.0846327     | 26.2234458     | 1.025E-38 | -1.12523 | down      | PREDICTED: cytochrome P450 86A8-like [Sesamum indicum]                                                 |
| c49121.graph_c0 | 4.1242365     | 3.91108386    | 1.67362332    | 13.7252634     | 16.5235013     | 15.7053305     | 0.0028011 | 1.16225  | up        | PREDICTED: uncharacterized protein LOC105160017 [Sesamum indicum]                                      |
| c49124.graph_c0 | 0             | 0             | 0             | 2.76816209     | 3.87160539     | 7.04213387     | 2.537E-06 | Inf      | up        | -                                                                                                      |

| #ID             | 0 h-1<br>FPKM | 0 h-2<br>FPKM | 0 h-3<br>FPKM | 28 h-1<br>FPKM | 28 h-2<br>FPKM | 28 h-3<br>FPKM | FDR       | log2FC   | regulated | nr_annotation                                                                                        |
|-----------------|---------------|---------------|---------------|----------------|----------------|----------------|-----------|----------|-----------|------------------------------------------------------------------------------------------------------|
| c49128.graph_c3 | 0             | 0             | 0             | 1.45129482     | 1.38980031     | 1.11247231     | 6.947E-11 | Inf      | up        | PREDICTED: calcium-dependent protein kinase 29 [Sesamum indicum]                                     |
| c49128.graph_c4 | 12.2497484    | 12.8202852    | 11.7228724    | 8.42532208     | 8.66602047     | 8.70596321     | 6.247E-58 | -1.60198 | down      | PREDICTED: uncharacterized protein LOC105173091 [Sesamum indicum]                                    |
| c49132.graph_c3 | 1.79096041    | 1.51263601    | 2.01377316    | 0              | 0              | 0              | 1.081E-34 | -Inf     | down      | -                                                                                                    |
| c49134.graph_c0 | 1.2336301     | 2.14759198    | 1.58526351    | 0.35084162     | 0.17598727     | 0.4453305      | 7.497E-10 | -3.44154 | down      | retrotransposon protein, putative, unclassified [Oryza sativa Japonica Group]                        |
| c49138.graph_c2 | 29.5557684    | 30.2277262    | 28.6972984    | 16.2972808     | 14.823203      | 16.8432511     | 6.08E-121 | -1.97304 | down      | hypothetical protein MIMGU_mgv1a026550mg, partial [Erythranthe guttata]                              |
| c49142.graph_c2 | 70.958353     | 73.7247194    | 66.3121488    | 73.2139947     | 70.0758526     | 71.5964921     | 2.566E-40 | -1.06315 | down      | PREDICTED: ethylene-responsive transcription factor RAP2-12-like [Sesamum indicum]                   |
| c49146.graph_c0 | 18.8429163    | 20.460241     | 17.1002073    | 15.2810581     | 12.959042      | 13.7003567     | 1.264E-36 | -1.51649 | down      | PREDICTED: beta-galactosidase 3 [Sesamum indicum]                                                    |
| c49149.graph_c0 | 0             | 0             | 0             | 0.87829464     | 0.46933701     | 1.18471799     | 4.941E-06 | Inf      | up        | --                                                                                                   |
| c49152.graph_c0 | 143.379752    | 132.474897    | 143.607577    | 137.452186     | 139.741618     | 140.514528     | 1.918E-41 | -1.0968  | down      | PREDICTED: xyloglucan galactosyltransferase KATAMARI1 homolog [Sesamum indicum]                      |
| c49154.graph_c0 | 87.9182565    | 90.2744968    | 89.7898008    | 90.5478022     | 90.4616944     | 88.7417071     | 1.62E-40  | -1.08136 | down      | PREDICTED: uncharacterized protein LOC105158432 [Sesamum indicum]                                    |
| c49154.graph_c1 | 102.157883    | 108.387619    | 101.910049    | 96.7890245     | 97.8355363     | 95.6784041     | 1.383E-38 | -1.19652 | down      | hypothetical protein MIMGU_mgv1a005/04mg [Erythranthe guttata]                                       |
| c49157.graph_c4 | 2.35944133    | 2.11956765    | 0.85517258    | 11.520129      | 11.5926189     | 11.337804      | 1.112E-09 | 1.61151  | up        | MYB-related transcription factor [Salvia miltiorrhiza]                                               |
| c49158.graph_c0 | 0             | 0             | 0             | 3.59546684     | 5.88071844     | 5.00201057     | 1.883E-19 | Inf      | up        | S-adenosyl-methionine synthetase [Undaria pinnatifida]                                               |
| c49159.graph_c0 | 19.1985957    | 19.0516719    | 18.6276379    | 96.9099803     | 107.687492     | 107.066683     | 9.126E-50 | 1.36401  | up        | PREDICTED: DNA ligase 1-like isoform X2 [Sesamum indicum]                                            |
| c49159.graph_c1 | 0             | 0.6754867     | 0.43357941    | 5.76277262     | 4.98182875     | 8.40424539     | 8.817E-06 | 3.01141  | up        | -                                                                                                    |
| c49160.graph_c0 | 472.266599    | 439.129256    | 451.413504    | 173.467583     | 176.850494     | 173.741961     | 2.27E-149 | -2.46899 | down      | PREDICTED: G-type lectin S-receptor-like serine/threonine-protein kinase At1g11300 [Sesamum indicum] |
| c49160.graph_c3 | 3.74589925    | 4.28531451    | 4.51891687    | 3.11142627     | 1.60532925     | 1.49613657     | 4.547E-12 | -2.10835 | down      | PREDICTED: dot zinc finger protein DZF1.4-like [Sesamum indicum]                                     |
| c49161.graph_c0 | 20.2874361    | 20.4244621    | 18.4289052    | 6.65210428     | 7.30693794     | 9.12744313     | 2.117E-74 | -2.44511 | down      | hypothetical protein CICLE_v10004556mg [Citrus clementina]                                           |
| c49163.graph_c0 | 0.95841634    | 1.26463206    | 0.8117383     | 6.5541043      | 5.66044856     | 7.44082864     | 1.901E-10 | 1.60865  | up        | putative retroelement pol polyprotein [Arabidopsis thaliana]                                         |
| c49165.graph_c0 | 202.012994    | 190.75215     | 186.988449    | 90.1429249     | 94.184555      | 89.0753135     | 6.23E-154 | -2.1743  | down      | PREDICTED: UDP-D-apiiose/UDP-D-xylose synthase 2 isoform X1 [Phoenix dactylifera]                    |
| c49168.graph_c0 | 19.5656038    | 20.2420905    | 18.0526815    | 17.4528274     | 17.9114712     | 17.7584628     | 1.118E-40 | -1.21264 | down      | PREDICTED: kinesin-like protein NACK1 [Sesamum indicum]                                              |
| c49169.graph_c1 | 57.2586257    | 52.1416039    | 64.3821508    | 34.9683607     | 30.5294106     | 34.42933       | 1.777E-20 | -1.89043 | down      | hypothetical protein (mitochondrion) [Vicia faba]                                                    |
| c49169.graph_c2 | 303.595306    | 327.392522    | 335.249452    | 195.540701     | 156.063708     | 172.761665     | 2.42E-52  | -1.97333 | down      | Cell wall-associated hydrolase, partial [Medicago truncatula]                                        |
| c49169.graph_c4 | 21.921697     | 16.4214056    | 25.3718795    | 11.7120165     | 7.33570871     | 10.7622859     | 6.872E-08 | -2.18832 | down      | hypothetical protein (mitochondrion) [Capsicum annuum]                                               |
| c49170.graph_c0 | 20.5873319    | 20.7043961    | 18.4487127    | 7.18959171     | 7.81933962     | 7.90473692     | 9.53E-121 | -2.47142 | down      | PREDICTED: type I inositol 1,4,5-trisphosphate 5-phosphatase 1-like isoform X2 [Sesamum indicum]     |

| #ID             | 0 h-1<br>FPKM | 0 h-2<br>FPKM | 0 h-3<br>FPKM | 28 h-1<br>FPKM | 28 h-2<br>FPKM | 28 h-3<br>FPKM | FDR       | log2FC   | regulated | nr_annotation                                                                                         |
|-----------------|---------------|---------------|---------------|----------------|----------------|----------------|-----------|----------|-----------|-------------------------------------------------------------------------------------------------------|
| c49172.graph_c1 | 0             | 0             | 0             | 1.98919683     | 2.18092785     | 2.28016509     | 2.935E-14 | Inf      | up        | predicted protein [Hordeum vulgare subsp. vulgare]                                                    |
| c49175.graph_c0 | 0.06271153    | 0             | 0.0805868     | 3.91974055     | 5.72026733     | 8.62844764     | 3.828E-08 | 5.89751  | up        | 60S ribosomal protein L7a, putative [Ricinus communis]                                                |
| c49177.graph_c0 | 0             | 0             | 0             | 4.4303876      | 5.8336609      | 6.57758297     | 4.356E-19 | Inf      | up        | 40S ribosomal protein S12 [Blumeria graminis f. sp. hordei DH14]                                      |
| c49179.graph_c2 | 36.4475922    | 37.3449011    | 38.1433725    | 25.0211324     | 26.8335655     | 27.7355539     | 2.321E-83 | -1.58283 | down      | hypothetical protein MIMGU_mgv1a0059/8mg [Erythranthe outafata]                                       |
| c49183.graph_c1 | 7.72243628    | 8.58048773    | 8.15722909    | 5.47791925     | 4.9055061      | 5.36758873     | 4.34E-59  | -1.72568 | down      | PREDICTED: mitochondrial fission protein ELM1 [Sesamum indicum]                                       |
| c49185.graph_c0 | 0             | 0             | 0             | 5.23926295     | 7.32849548     | 8.48030639     | 3.462E-19 | Inf      | up        | hypothetical protein CHLNCDRAFT_59606 [Chlorella variabilis]                                          |
| c49189.graph_c0 | 20.1221532    | 16.9169011    | 18.3370415    | 12.0199452     | 11.5001729     | 12.791579      | 6.485E-42 | -1.69815 | down      | PREDICTED: josephin-like protein [Sesamum indicum]                                                    |
| c49192.graph_c0 | 1.45165346    | 1.78401264    | 1.90237142    | 8.5344416      | 8.24341458     | 9.43596861     | 5.721E-18 | 1.25815  | up        | PREDICTED: 2-oxoisovalerate dehydrogenase subunit alpha 1, mitochondrial isoform X1 [Sesamum indicum] |
| c49193.graph_c0 | 1.527031      | 1.22856231    | 1.44879746    | 1.19281582     | 1.22684444     | 1.22723961     | 4.643E-09 | -1.29561 | down      | PREDICTED: probable ubiquitin conjugation factor E4 [Sesamum indicum]                                 |
| c49194.graph_c1 | 0.17018834    | 0.13628701    | 0.13121925    | 1.08848877     | 0.9828033      | 1.09006112     | 0.0002041 | 1.76523  | up        | -                                                                                                     |
| c49197.graph_c2 | 2.13997294    | 1.80132465    | 1.06248066    | 0.07069636     | 0.03191609     | 0.05768766     | 7.13E-15  | -6.04542 | down      | -                                                                                                     |
| c49199.graph_c0 | 36.1157866    | 38.600282     | 29.3574707    | 33.3971791     | 33.0402033     | 33.6867129     | 1.255E-12 | -1.14346 | down      | PREDICTED: ABC transporter C family member 3-like [Sesamum indicum]                                   |
| c49220.graph_c0 | 60.1722097    | 59.914893     | 59.9486564    | 55.503234      | 53.3956814     | 53.2820444     | 3.644E-52 | -1.24126 | down      | unnamed protein product [Coffea canephora]                                                            |
| c49221.graph_c0 | 76.4187236    | 74.4084694    | 75.0094027    | 48.2680179     | 50.7734184     | 51.8203718     | 9.472E-84 | -1.67225 | down      | PREDICTED: mannosyl-oligosaccharide 1,2-alpha-mannosidase MNS3 [Sesamum indicum]                      |
| c49224.graph_c0 | 29.1199115    | 30.5223158    | 31.2334263    | 32.7715629     | 31.7468734     | 31.8685398     | 6.675E-32 | -1.00643 | down      | PREDICTED: uncharacterized protein LOC105173178 [Sesamum indicum]                                     |
| c49230.graph_c0 | 34.3969378    | 35.601853     | 36.1374839    | 27.634004      | 25.5903538     | 25.2073983     | 2.96E-76  | -1.5277  | down      | PREDICTED: protein NLP7 isoform X1 [Sesamum indicum]                                                  |
| c49230.graph_c1 | 39.8531658    | 41.0831385    | 41.0500256    | 22.315487      | 21.8448187     | 22.7768966     | 1.97E-92  | -1.95652 | down      | PREDICTED: uncharacterized protein LOC105156041 [Sesamum indicum]                                     |
| c49231.graph_c0 | 1.06036903    | 1.06143083    | 0.93679863    | 11.8972197     | 14.1777979     | 13.2453745     | 8.372E-20 | 2.59533  | up        | PREDICTED: methyl-CpG-binding domain-containing protein 13-like isoform X1 [Sesamum indicum]          |
| c49233.graph_c2 | 10.7700719    | 10.088508     | 10.3693956    | 10.3650219     | 10.5473851     | 10.9189266     | 4.715E-18 | -1.06243 | down      | PREDICTED: uncharacterized protein LOC105166728 [Sesamum indicum]                                     |
| c49236.graph_c1 | 24.5667215    | 25.7011435    | 23.9206127    | 11.7477948     | 12.0622907     | 13.0813991     | 5.486E-70 | -2.09754 | down      | PREDICTED: kinesin KP1-like isoform X2 [Sesamum indicum]                                              |
| c49238.graph_c0 | 19.7238033    | 20.0019772    | 18.3458967    | 13.5283255     | 13.8750749     | 12.5547608     | 7.273E-67 | -1.62934 | down      | PREDICTED: guanine nucleotide-binding protein alpha-1 subunit [Sesamum indicum]                       |
| c49238.graph_c1 | 265.148778    | 266.512525    | 279.593719    | 153.766877     | 139.273779     | 145.205931     | 8.93E-100 | -1.97962 | down      | PREDICTED: uncharacterized protein LOC105157579 [Sesamum indicum]                                     |
| c49239.graph_c1 | 57.7586141    | 58.1576098    | 53.7923488    | 55.5003795     | 56.6239156     | 56.2620469     | 5.285E-43 | -1.10088 | down      | hypothetical protein MIMGU_mgv1a000565mg [Erythranthe outafata]                                       |

| #ID             | 0 h-1<br>FPKM | 0 h-2<br>FPKM | 0 h-3<br>FPKM | 28 h-1<br>FPKM | 28 h-2<br>FPKM | 28 h-3<br>FPKM | FDR       | log2FC   | regulated | nr_annotation                                                                                               |
|-----------------|---------------|---------------|---------------|----------------|----------------|----------------|-----------|----------|-----------|-------------------------------------------------------------------------------------------------------------|
| c49244.graph_c1 | 25.2409747    | 25.8404827    | 25.8625178    | 22.410079      | 21.8654846     | 18.6550054     | 5.055E-41 | -1.38163 | down      | PREDICTED: protein ENHANCED DISEASE RESISTANCE 2 [Sesamum indicum]                                          |
| c49245.graph_c0 | 4.99249682    | 5.64934336    | 5.29980719    | 71.9393117     | 73.7859801     | 75.1796146     | 1.724E-34 | 2.70172  | up        | -                                                                                                           |
| c49245.graph_c3 | 85.9601126    | 92.9550067    | 71.1150471    | 41.4982015     | 35.2455509     | 42.8673044     | 2.513E-28 | -2.15098 | down      | hypothetical protein JCGZ_25510 [Jatropha curcas]                                                           |
| c49246.graph_c0 | 0.96759881    | 0.70137662    | 1.02902298    | 9.67568444     | 8.76907886     | 8.91434439     | 2.023E-43 | 2.24965  | up        | PREDICTED: uncharacterized protein LOC105164785 isoform X2 [Sesamum indicum]                                |
| c49249.graph_c2 | 5.21867007    | 5.51411221    | 5.29044481    | 25.0331356     | 26.4838245     | 24.0032496     | 2.793E-13 | 1.14574  | up        | PREDICTED: 15 kDa selenoprotein [Sesamum indicum]                                                           |
| c49250.graph_c0 | 0.02842689    | 0             | 0             | 0.5991545      | 0.57828933     | 0.74178717     | 4.578E-10 | 5.01942  | up        | ADP-glucose pyrophosphorylase beta subunit IbAGPb1A [Ipomoea batatas]                                       |
| c49255.graph_c2 | 1233.81734    | 1168.46724    | 1280.4424     | 741.024366     | 771.773379     | 786.972871     | 1.5E-65   | -1.77034 | down      | PREDICTED: rop guanine nucleotide exchange factor 7-like isoform X1 [Sesamum indicum]                       |
| c49256.graph_c0 | 2.12491994    | 0.96683988    | 1.48942159    | 14.3206105     | 14.0076827     | 13.1748298     | 1.035E-11 | 2.09189  | up        | PREDICTED: uncharacterized protein LOC105160829 [Sesamum indicum]                                           |
| c49257.graph_c2 | 2.6646774     | 2.13387653    | 2.22574037    | 19.3667217     | 16.6994489     | 17.4624109     | 3.152E-24 | 1.84116  | up        | PREDICTED: uncharacterized protein LOC105174437 [Sesamum indicum]                                           |
| c49258.graph_c1 | 42.6192204    | 38.4618197    | 42.3361376    | 26.0057857     | 27.2285338     | 27.0958939     | 2.972E-64 | -1.71024 | down      | PREDICTED: probable serine/threonine-protein kinase NAK [Sesamum indicum]                                   |
| c49260.graph_c2 | 37004.0695    | 37864.8467    | 39206.8195    | 5586.08096     | 4115.49667     | 5205.14571     | 8.831E-13 | -4.0266  | down      | hypothetical protein MTR_5g051050, partial [Medicago truncatula]                                            |
| c49262.graph_c0 | 38.0841397    | 39.5639604    | 36.6981106    | 33.1972554     | 30.959641      | 32.7992779     | 1.065E-59 | -1.32778 | down      | PREDICTED: probable LRR receptor-like serine/threonine-protein kinase At1g56140 [Nicotiana tomentosiformis] |
| c49266.graph_c0 | 35.7557528    | 36.7780297    | 36.5911811    | 23.6950892     | 23.197603      | 23.742444      | 1.919E-98 | -1.71822 | down      | PREDICTED: C2 and GRAM domain-containing protein At1g03370 isoform X1 [Sesamum indicum]                     |
| c49268.graph_c1 | 1.92083326    | 2.16310127    | 3.18828127    | 25.6524288     | 21.3760258     | 21.6916163     | 1.018E-22 | 2.14281  | up        | PREDICTED: auxin-responsive protein IAA14 [Sesamum indicum]                                                 |
| c49275.graph_c1 | 3.37275195    | 2.5932587     | 3.70598648    | 2.13156233     | 2.37367448     | 2.89889575     | 1.047E-06 | -1.47696 | down      | hypothetical protein CICLE_v10022328mg [Citrus clementina]                                                  |
| c49275.graph_c2 | 31.8384719    | 27.6126244    | 30.4642262    | 15.9797962     | 17.6710241     | 18.1030413     | 5.845E-56 | -1.88699 | down      | hypothetical protein MIMGU_mgv1a010148mg [Erythranthe outtata]                                              |
| c49277.graph_c0 | 7.4625693     | 9.28615305    | 8.05006675    | 2.56259859     | 2.20146654     | 2.4564874      | 9.67E-42  | -2.87065 | down      | PREDICTED: cyclic pyranopterin monophosphate synthase, mitochondrial [Sesamum indicum]                      |
| c49281.graph_c0 | 15.6738367    | 15.3750791    | 16.9545544    | 14.6841787     | 14.0287713     | 14.6296215     | 1.298E-29 | -1.2389  | down      | PREDICTED: peroxisome biogenesis protein 1 isoform X2 [Sesamum indicum]                                     |
| c49284.graph_c2 | 63.9069131    | 67.2292996    | 56.1713899    | 53.8825869     | 53.1847018     | 52.28065       | 3.901E-38 | -1.32206 | down      | PREDICTED: probable glycerol-3-phosphate dehydrogenase [NAD(+)] 1, cytosolic [Sesamum indicum]              |
| c49287.graph_c0 | 271.677864    | 218.103826    | 265.328776    | 52.1278311     | 77.7311106     | 69.9264162     | 8.495E-39 | -3.00907 | down      | PREDICTED: peroxygenase-like [Solanum lycopersicum]                                                         |
| c49287.graph_c1 | 178.244103    | 178.37497     | 185.343425    | 59.2589252     | 66.4133178     | 67.9054851     | 3.54E-193 | -2.57608 | down      | PREDICTED: probable helicase DDB_G0274399 isoform X1 [Sesamum indicum]                                      |
| c49288.graph_c0 | 6.55130786    | 5.84677388    | 5.17292998    | 2.40940985     | 3.10781598     | 2.57460076     | 1.823E-16 | -2.20697 | down      | PREDICTED: GPI-anchored protein LORELEI-like [Pyrus x bretschneideri]                                       |



| #ID             | 0 h-1<br>FPKM | 0 h-2<br>FPKM | 0 h-3<br>FPKM | 28 h-1<br>FPKM | 28 h-2<br>FPKM | 28 h-3<br>FPKM | FDR       | log2FC   | regulated | nr_annotation                                                                                  |
|-----------------|---------------|---------------|---------------|----------------|----------------|----------------|-----------|----------|-----------|------------------------------------------------------------------------------------------------|
| c49288.graph_c3 | 26.2166147    | 27.550227     | 23.291934     | 6.66777196     | 6.85653582     | 6.36654721     | 1.65E-135 | -3.04304 | down      | PREDICTED: probable protein phosphatase 2C 25 [Sesamum indicum]                                |
| c49289.graph_c0 | 146.296335    | 153.475486    | 135.25508     | 132.024491     | 128.662425     | 133.428187     | 5.573E-52 | -1.23174 | down      | PREDICTED: BTB/POZ domain-containing protein At5g17580 [Sesamum indicum]                       |
| c49290.graph_c0 | 189.868841    | 179.435037    | 181.311991    | 160.144069     | 160.649819     | 162.980847     | 2.757E-54 | -1.27673 | down      | PREDICTED: probable acyl-activating enzyme 18, peroxisomal isoform X2 [Vitis vinifera]         |
| c49303.graph_c0 | 0             | 0             | 0             | 0.46501141     | 0.41986171     | 0.94319314     | 2.916E-05 | Inf      | up        | PREDICTED: delta-1-pyrroline-5-carboxylate synthase [Brachypodium distachyon]                  |
| c49306.graph_c0 | 22.6785808    | 22.3437894    | 23.1060099    | 4.05327723     | 3.50648941     | 4.34203477     | 0         | -3.60712 | down      | unnamed protein product [Coffea canephora]                                                     |
| c49307.graph_c0 | 54.4230837    | 56.9109965    | 51.6257427    | 322.889592     | 308.708995     | 295.226307     | 2.71E-63  | 1.41778  | up        | PREDICTED: pentatricopeptide repeat-containing protein At3g21470 [Sesamum indicum]             |
| c49321.graph_c0 | 19.0625171    | 20.768629     | 18.7013154    | 20.1776214     | 18.7565364     | 19.9495255     | 6.452E-34 | -1.08123 | down      | PREDICTED: serine hydroxymethyltransferase 6-like [Sesamum indicum]                            |
| c49322.graph_c1 | 2.90130667    | 4.44900545    | 3.56964314    | 34.276827      | 30.3816371     | 29.8000828     | 1.161E-34 | 2.02069  | up        | -                                                                                              |
| c49328.graph_c0 | 115.048104    | 123.448797    | 105.787476    | 44.5074017     | 43.3335689     | 43.6859077     | 3.86E-115 | -2.4775  | down      | PREDICTED: uncharacterized protein LOC105166619 [Sesamum indicum]                              |
| c49330.graph_c0 | 186.515212    | 187.99822     | 181.881244    | 181.267107     | 176.073958     | 182.650664     | 1.119E-43 | -1.13323 | down      | PREDICTED: membrin-11 [Sesamum indicum]                                                        |
| c49343.graph_c0 | 59.796504     | 54.5843116    | 59.8105951    | 22.130469      | 23.2611229     | 23.2157157     | 2.75E-111 | -2.43499 | down      | PREDICTED: serine/threonine-protein kinase H11 [Sesamum indicum]                               |
| c49345.graph_c0 | 0             | 0             | 0             | 1.07329081     | 1.36811432     | 2.39556112     | 4.072E-06 | Inf      | up        | -                                                                                              |
| c49348.graph_c1 | 0.7656602     | 1.44088255    | 1.29875284    | 25.8650704     | 21.2836521     | 23.3942546     | 2.743E-54 | 3.23609  | up        | PREDICTED: LRR receptor-like serine/threonine-protein kinase GSO2 isoform X2 [Sesamum indicum] |
| c49350.graph_c0 | 104.359473    | 105.154074    | 104.206274    | 83.0505922     | 80.4723649     | 83.7141591     | 2.684E-69 | -1.43395 | down      | PREDICTED: autophagy-related protein 18f [Sesamum indicum]                                     |
| c49353.graph_c4 | 1.36477884    | 0.95142273    | 0.68899083    | 6.34116063     | 4.8618546      | 5.3188698      | 1.06E-06  | 1.37613  | up        | PREDICTED: QWRK motif-containing protein 8 [Sesamum indicum]                                   |
| c49353.graph_c5 | 101.752668    | 99.3385947    | 95.9004453    | 95.8591251     | 93.341796      | 94.9400464     | 5.045E-45 | -1.1536  | down      | PREDICTED: nuclear poly(A) polymerase 4-like isoform X2 [Sesamum indicum]                      |
| c49353.graph_c7 | 1.39625006    | 2.70512554    | 2.72029422    | 13.0940193     | 12.2955786     | 11.2188435     | 2.394E-09 | 1.32682  | up        | PREDICTED: QWRK motif-containing protein 8 [Sesamum indicum]                                   |
| c49354.graph_c0 | 6.67941997    | 6.86205862    | 9.7127032     | 5.62107403     | 7.38225865     | 6.98437009     | 0.0005298 | -1.31398 | down      | -                                                                                              |
| c49354.graph_c1 | 22.9590578    | 23.0316851    | 23.2585397    | 17.5334504     | 18.6783751     | 18.7478101     | 2.099E-56 | -1.42403 | down      | fructose-6-phosphate 2-kinase/fructose-2,6-bisphosphatase [Solanum tuberosum]                  |
| c49354.graph_c2 | 1.45919827    | 1.13606845    | 1.66678005    | 7.07024597     | 6.49016536     | 7.21157871     | 0.0043033 | 1.19222  | up        | PREDICTED: 6-phosphofructo-2-kinase/fructose-2,6-bisphosphatase [Sesamum indicum]              |
| c49355.graph_c1 | 0             | 0             | 0             | 191.726728     | 188.899412     | 177.551792     | 0         | Inf      | up        | PREDICTED: (RS)-norcochlorine 6-O-methyltransferase-like [Sesamum indicum]                     |
| c49355.graph_c3 | 2.63241936    | 2.24260028    | 2.66302627    | 564.605564     | 571.827602     | 523.227074     | 0         | 6.69091  | up        | PREDICTED: (RS)-norcochlorine 6-O-methyltransferase-like [Sesamum indicum]                     |
| c49360.graph_c2 | 2.44384408    | 2.96763197    | 3.06321255    | 2.62058133     | 2.40557489     | 2.60168711     | 3.095E-10 | -1.24458 | down      | PREDICTED: rho GTPase-activating protein 2-like [Sesamum indicum]                              |

| #ID             | 0 h-1<br>FPKM | 0 h-2<br>FPKM | 0 h-3<br>FPKM | 28 h-1<br>FPKM | 28 h-2<br>FPKM | 28 h-3<br>FPKM | FDR       | log2FC   | regulated | nr_annotation                                                                        |
|-----------------|---------------|---------------|---------------|----------------|----------------|----------------|-----------|----------|-----------|--------------------------------------------------------------------------------------|
| c49362.graph_c1 | 4.52959179    | 4.64748067    | 4.87484025    | 54.772001      | 51.7204676     | 46.741818      | 6.442E-70 | 2.35488  | up        | -                                                                                    |
| c49364.graph_c1 | 7.75482441    | 8.62128324    | 9.78888017    | 6.08505952     | 5.6518598      | 5.53515415     | 4.401E-14 | -1.69278 | down      | Cationic amino acid transporter 2 isoform 1 [Theobroma cacao]                        |
| c49366.graph_c0 | 23.5762998    | 22.6509606    | 27.1450093    | 2.24673761     | 2.20440484     | 2.55442523     | 1.411E-69 | -4.48058 | down      | PREDICTED: MLO-like protein 3 [Sesamum indicum]                                      |
| c49366.graph_c1 | 124.967387    | 116.459377    | 122.476653    | 670.638151     | 672.688243     | 683.665674     | 1.733E-69 | 1.38731  | up        | PREDICTED: 40S ribosomal protein S26-like [Musa acuminata subsp. malaccensis]        |
| c49369.graph_c4 | 98.3436651    | 100.658719    | 78.001304     | 48.4708766     | 46.499948      | 42.4100779     | 2.366E-29 | -2.09974 | down      | hypothetical protein MIMGU_mgv1a000459mg [Erythranthe guttata]                       |
| c49372.graph_c0 | 0             | 0             | 0             | 3.42532447     | 5.53975532     | 8.0165341      | 1.511E-09 | Inf      | up        | small subunit ribosomal protein S6e, cytoplasmic [Guillardia theta CCMP2712]         |
| c49375.graph_c0 | 2.25532291    | 2.05641067    | 2.29558751    | 2.23963847     | 2.35921415     | 2.33075869     | 2.113E-06 | -1.02233 | down      | PREDICTED: protein-L-isoaspartate O-methyltransferase 1 isoform X1 [Sesamum indicum] |
| c49376.graph_c0 | 0.71572306    | 1.09573137    | 1.1361401     | 4.13086811     | 4.08895124     | 4.74402506     | 0.000514  | 1.04247  | up        | hypothetical protein MIMGU_mgv1a024598mg, partial [Erythranthe guttata]              |
| c49376.graph_c1 | 1.55062723    | 1.02117102    | 1.31093249    | 6.88055181     | 6.77483092     | 6.46148527     | 2.798E-12 | 1.28374  | up        | PREDICTED: uncharacterized protein LOC105163785 [Sesamum indicum]                    |
| c49378.graph_c0 | 53.6530519    | 49.6193589    | 49.9097965    | 13.030451      | 12.5504581     | 13.9442099     | 0         | -3.04375 | down      | PREDICTED: uncharacterized protein LOC105170029 [Sesamum indicum]                    |
| c49378.graph_c2 | 143.158693    | 145.333797    | 137.015717    | 20.5604444     | 21.4361863     | 20.2755301     | 0         | -3.86266 | down      | PREDICTED: uncharacterized protein LOC105158337 [Sesamum indicum]                    |
| c49380.graph_c0 | 0.29697507    | 0.17836347    | 0.53427462    | 11.5258438     | 9.78313049     | 12.6808914     | 8.115E-31 | 3.97323  | up        | PREDICTED: uncharacterized protein LOC105167081 [Sesamum indicum]                    |
| c49380.graph_c2 | 0.38560504    | 0.17155163    | 0.36705018    | 8.3972857      | 6.3261114      | 7.77533127     | 1.888E-31 | 3.51421  | up        | PREDICTED: gamma-cadinene synthase-like [Sesamum indicum]                            |
| c49386.graph_c0 | 21.7069217    | 22.2178101    | 20.6893399    | 12.5613565     | 10.7003795     | 11.6379803     | 1.525E-98 | -1.97833 | down      | hypothetical protein MIMGU_mgv1a000652mg [Erythranthe guttata]                       |
| c49386.graph_c1 | 529.836112    | 515.772176    | 543.915697    | 303.040285     | 311.460407     | 350.94991      | 5.693E-92 | -1.80968 | down      | Chloroplast chlorophyll a/b binding protein cab-B05 [Bambusa oldhamii]               |
| c49392.graph_c1 | 5.53459272    | 4.68780635    | 4.10317544    | 0.20628257     | 0.04656345     | 0              | 9.635E-55 | -6.91675 | down      | -                                                                                    |
| c49392.graph_c2 | 11.0139353    | 9.73256395    | 9.68386617    | 77.1569372     | 79.2792818     | 76.3045172     | 3.42E-99  | 1.84583  | up        | PREDICTED: auxin response factor 6-like isoform X2 [Nicotiana tomentosiformis]       |
| c49392.graph_c4 | 16.2406554    | 17.255807     | 14.5864789    | 6.8537118      | 6.85947245     | 6.25835534     | 9.97E-96  | -2.35699 | down      | PREDICTED: uncharacterized protein LOC105175883 [Sesamum indicum]                    |
| c49395.graph_c0 | 1.12070299    | 1.41132849    | 1.57951685    | 0.76197077     | 1.04384411     | 1.37216425     | 2.682E-05 | -1.46409 | down      | -                                                                                    |
| c49398.graph_c0 | 18.6131658    | 18.2039785    | 16.6414523    | 12.4407362     | 12.6491912     | 12.6102141     | 1.553E-67 | -1.59298 | down      | PREDICTED: SWI/SNF complex subunit SWI3C [Sesamum indicum]                           |
| c49402.graph_c0 | 3.81323882    | 3.13340517    | 3.5837012     | 3.68146507     | 2.46500196     | 3.74661847     | 1.267E-05 | -1.17899 | down      | Pollen-specific SF21 [Gossypium arboreum]                                            |
| c49405.graph_c0 | 8.42025304    | 9.34609251    | 8.09686693    | 135.30151      | 137.53852      | 132.689737     | 1.62E-237 | 2.88096  | up        | hypothetical protein MIMGU_mgv1a009036mg [Erythranthe guttata]                       |
| c49405.graph_c1 | 0             | 0             | 0             | 3.50705729     | 3.18366036     | 3.63517068     | 1.817E-32 | Inf      | up        | PREDICTED: subtilisin-like protease SBT5.3 [Sesamum indicum]                         |
| c49405.graph_c2 | 14.4546168    | 13.4286169    | 12.8562348    | 14.707745      | 12.8107682     | 13.2920801     | 1.629E-23 | -1.08672 | down      | unnamed protein product [Coffea canephora]                                           |

| #ID             | 0 h-1<br>FPKM | 0 h-2<br>FPKM | 0 h-3<br>FPKM | 28 h-1<br>FPKM | 28 h-2<br>FPKM | 28 h-3<br>FPKM | FDR       | log2FC   | regulated | nr_annotation                                                                                                |
|-----------------|---------------|---------------|---------------|----------------|----------------|----------------|-----------|----------|-----------|--------------------------------------------------------------------------------------------------------------|
| c49409.graph_c1 | 21.5742805    | 20.9018763    | 18.0283342    | 20.304051      | 19.6975673     | 19.2284849     | 4.699E-28 | -1.11916 | down      | PREDICTED: bifunctional riboflavin kinase/FMN phosphatase-like [Sesamum indicum]                             |
| c49414.graph_c0 | 34.4797943    | 33.5515373    | 35.6560621    | 23.8522738     | 24.6061599     | 24.951347      | 1.184E-83 | -1.58917 | down      | PREDICTED: E3 ubiquitin-protein ligase RGLG2-like isoform X1 [Sesamum indicum]                               |
| c49415.graph_c0 | 237.305843    | 232.929864    | 236.419897    | 59.3825927     | 57.566318      | 61.9193954     | 0         | -3.07236 | down      | -                                                                                                            |
| c49417.graph_c0 | 15.59661      | 15.3923371    | 12.4205563    | 15.0874258     | 14.9919917     | 14.395655      | 5.191E-09 | -1.05287 | down      | -                                                                                                            |
| c49417.graph_c1 | 20.8426626    | 19.5735837    | 20.0397356    | 19.5598022     | 19.7931839     | 19.3720732     | 2.437E-39 | -1.1322  | down      | PREDICTED: exocyst complex component EXO70A1 [Sesamum indicum]                                               |
| c49417.graph_c4 | 13.0790362    | 14.8125735    | 13.3594734    | 10.0541779     | 10.1508321     | 9.49689857     | 1.065E-35 | -1.56463 | down      | PREDICTED: uncharacterized RING finger protein C4G3.12c-like [Sesamum indicum]                               |
| c49417.graph_c6 | 143.411344    | 149.959197    | 132.326661    | 107.451258     | 104.052156     | 103.924174     | 6.948E-77 | -1.52194 | down      | PREDICTED: omega-amidase, chloroplastic isoform X2 [Nicotiana sylvestris]                                    |
| c49418.graph_c0 | 28.9705904    | 30.5409174    | 26.8952884    | 16.6621547     | 16.5038912     | 16.3357114     | 4.991E-68 | -1.89315 | down      | PREDICTED: putative pentatricopeptide repeat-containing protein At1g13630 [Sesamum indicum]                  |
| c49421.graph_c1 | 81.3259596    | 74.4969283    | 72.9869367    | 36.7947312     | 37.6838506     | 35.7933131     | 4.22E-138 | -2.14264 | down      | hypothetical protein MIMGU_mgv1a006955mg [Erythrane outtata]                                                 |
| c49428.graph_c1 | 7.59385121    | 6.89103892    | 6.61199963    | 48.6666761     | 51.8355367     | 46.6774518     | 1.408E-60 | 1.71309  | up        | PREDICTED: magnesium-protoporphyrin IX monomethyl ester [oxidative] cyclase, chloroplastic [Sesamum indicum] |
| c49428.graph_c2 | 0.06473118    | 0.58316399    | 0.33272852    | 24.793373      | 25.9542727     | 23.8013999     | 6.911E-71 | 5.15117  | up        | PREDICTED: GATA transcription factor 12-like [Sesamum indicum]                                               |
| c49430.graph_c0 | 0.05039946    | 0             | 0             | 1.09890108     | 2.18285021     | 3.07865045     | 3.843E-05 | 5.92347  | up        | hypothetical protein AIO3_04014 [Capronia epimyces CBS 606.96]                                               |
| c49432.graph_c0 | 4.54681319    | 2.79061865    | 3.02803856    | 1.83320744     | 2.02545977     | 3.16890856     | 0.0001099 | -1.64438 | down      | mitochondrial carrier, adenine nucleotidetranslocator [Galdieria sulphuraria]                                |
| c49434.graph_c0 | 216.622941    | 223.61775     | 201.209839    | 180.686781     | 180.294354     | 180.658012     | 2.154E-55 | -1.33349 | down      | PREDICTED: protein misato homolog 1 isoform X1 [Sesamum indicum]                                             |
| c49437.graph_c0 | 2.22736594    | 1.6827142     | 1.94417213    | 9.54502789     | 10.5349674     | 9.234241       | 9.513E-16 | 1.23413  | up        | FIZZY-related 3 isoform 1 [Theobroma cacao]                                                                  |
| c49438.graph_c0 | 0.6765703     | 0.75249753    | 0.46369046    | 5.60569228     | 4.60756451     | 4.52961629     | 6.273E-17 | 1.87541  | up        | PREDICTED: ABC transporter B family member 4-like [Sesamum indicum]                                          |
| c49438.graph_c2 | 2.14721053    | 2.17745685    | 1.24436789    | 14.1064213     | 14.5694717     | 14.2240263     | 4.245E-50 | 1.86143  | up        | PREDICTED: wall-associated receptor kinase-like 14 [Sesamum indicum]                                         |
| c49439.graph_c0 | 8.04482393    | 8.41677542    | 8.79804339    | 41.3639835     | 39.8482548     | 39.501886      | 3.587E-50 | 1.16497  | up        | PREDICTED: random slug protein 5 [Sesamum indicum]                                                           |
| c49439.graph_c2 | 2.77931852    | 3.55490759    | 1.78576717    | 44.1031736     | 46.1032289     | 35.9878295     | 1.889E-28 | 2.87216  | up        | hypothetical protein EUGRSUZ_H01271 [Eucalyptus grandis]                                                     |
| c49446.graph_c1 | 4.34577073    | 3.12316478    | 4.0093756     | 17.5538662     | 16.5624485     | 15.6785434     | 6.217E-15 | 1.02643  | up        | PREDICTED: serine/threonine-protein kinase S1E20 [Sesamum indicum]                                           |
| c49447.graph_c0 | 0.39736854    | 0.53638202    | 0.61121379    | 0.46821443     | 0.52547894     | 0.39634174     | 0.0004086 | -1.24891 | down      | PREDICTED: uncharacterized protein LOC105155261 [Sesamum indicum]                                            |
| c49449.graph_c0 | 0.26384192    | 0.10564245    | 0.13561893    | 2.14769845     | 1.97379838     | 2.47228299     | 2.111E-07 | 2.62432  | up        | PREDICTED: protein DA1-related 2 isoform X2 [Sesamum indicum]                                                |
| c49451.graph_c1 | 8.09365087    | 7.24893908    | 5.83896804    | 47.2657511     | 43.9810648     | 40.0842582     | 1.19E-14  | 1.54517  | up        | hypothetical protein M569_10128, partial [Genlisea aurea]                                                    |
| c49452.graph_c0 | 0.57054479    | 0.97905618    | 0.68080317    | 5.80536129     | 5.08123683     | 5.12383169     | 1.102E-08 | 1.75256  | up        | Rop guanine nucleotide exchange factor 1 [Morus notabilis]                                                   |

| #ID             | 0 h-1<br>FPKM | 0 h-2<br>FPKM | 0 h-3<br>FPKM | 28 h-1<br>FPKM | 28 h-2<br>FPKM | 28 h-3<br>FPKM | FDR       | log2FC   | regulated | nr_annotation                                                                      |
|-----------------|---------------|---------------|---------------|----------------|----------------|----------------|-----------|----------|-----------|------------------------------------------------------------------------------------|
| c49456.graph_c0 | 0.68837441    | 0.76562635    | 0.88458837    | 5.55896172     | 7.52883184     | 5.21647747     | 6.949E-07 | 1.87351  | up        | PREDICTED: uncharacterized protein LOC105161573 [Sesamum indicum]                  |
| c49456.graph_c3 | 1.68681526    | 1.83896513    | 2.38224066    | 10.3296875     | 9.72128993     | 8.99351125     | 3.046E-15 | 1.20202  | up        | PREDICTED: pentatricopeptide repeat-containing protein At1g31920 [Sesamum indicum] |
| c49471.graph_c0 | 14.0316067    | 14.6214675    | 13.4375777    | 12.3631321     | 12.0120888     | 12.8661291     | 1.178E-40 | -1.26616 | down      | PREDICTED: pleiotropic drug resistance protein 1-like [Sesamum indicum]            |
| c49473.graph_c0 | 42.590805     | 43.5301905    | 41.7717582    | 42.3767573     | 40.0930481     | 41.5768752     | 1.327E-43 | -1.13419 | down      | PREDICTED: transcription factor GTE4-like isoform X3 [Sesamum indicum]             |
| c49474.graph_c0 | 247.894053    | 255.032471    | 226.648262    | 215.383563     | 220.832532     | 218.138179     | 8.514E-41 | -1.2463  | down      | PREDICTED: pyruvate decarboxylase 1 [Sesamum indicum]                              |
| c49474.graph_c1 | 10.2082867    | 9.46929023    | 10.7936726    | 6.28602601     | 6.15321429     | 5.56090144     | 3.699E-43 | -1.85148 | down      | PREDICTED: lipoxygenase 6, chloroplastic [Sesamum indicum]                         |
| c49474.graph_c6 | 11.2157525    | 12.4597502    | 12.4909945    | 5.53026337     | 5.39739215     | 5.32127485     | 2.246E-53 | -2.24607 | down      | PREDICTED: uncharacterized protein LOC105170638 isoform X1 [Sesamum indicum]       |
| c49479.graph_c0 | 0.05179035    | 0             | 0             | 4.29106581     | 7.57892906     | 9.61369798     | 1.724E-10 | 7.6395   | up        | hypothetical protein P1SMIDRAFT_01145 [Pisonotus microcarpus]                      |
| c49487.graph_c0 | 231.275744    | 219.907485    | 219.599078    | 228.577077     | 225.617175     | 231.344485     | 7.164E-37 | -1.05851 | down      | dead box A1P-dependent RNA helicase, putative [Kicinus communis]                   |
| c49488.graph_c0 | 2.3323775     | 0.94971377    | 1.26999891    | 0              | 0              | 0              | 8.68E-11  | -Inf     | down      | Fructose-bisphosphate aldolase A [Rozella allomycis CSF55]                         |
| c49494.graph_c0 | 218.726948    | 233.092716    | 219.219013    | 149.903453     | 143.965371     | 150.845614     | 3.095E-89 | -1.68374 | down      | hypothetical protein MIMGU_mgv1a000743mg [Erythranthe diffusa]                     |
| c49495.graph_c0 | 85.7893061    | 86.2121234    | 78.7172924    | 45.0102628     | 44.0758        | 42.9158776     | 1.57E-133 | -2.01507 | down      | PREDICTED: E3 ubiquitin-protein ligase RHF2A [Sesamum indicum]                     |
| c49495.graph_c1 | 10.9415026    | 10.8015391    | 11.2648178    | 4.85273329     | 5.14480321     | 5.36487777     | 1.764E-85 | -2.19409 | down      | PREDICTED: B11-like protein [Sesamum indicum]                                      |
| c49495.graph_c2 | 3.32389025    | 2.580292      | 3.05095041    | 25.0699246     | 23.8822067     | 24.7212127     | 8.764E-46 | 1.95039  | up        | PREDICTED: transcription factor bHLH143 [Sesamum indicum]                          |
| c49495.graph_c3 | 1.54483092    | 1.34467638    | 1.81254551    | 12.7410465     | 11.0632052     | 11.3127645     | 1.521E-11 | 1.80748  | up        | -                                                                                  |
| c49495.graph_c4 | 20.628298     | 15.5388594    | 12.9863304    | 11.6608552     | 11.4858097     | 10.4419642     | 3.263E-07 | -1.635   | down      | -                                                                                  |
| c49500.graph_c1 | 117.000092    | 116.371935    | 103.367516    | 49.7483631     | 52.3314486     | 48.2989446     | 2.3E-165  | -2.25228 | down      | PREDICTED: pectinesterase-like isoform X1 [Sesamum indicum]                        |
| c49500.graph_c8 | 0.03320279    | 0.03323603    | 0.04266689    | 9.38718968     | 14.7508591     | 10.0818856     | 1.539E-23 | 7.19768  | up        | PREDICTED: tyrosine/DOPA decarboxylase 1-like [Sesamum indicum]                    |
| c49500.graph_c9 | 64.8536178    | 62.4836653    | 70.6064096    | 16.6650226     | 15.8685494     | 20.3235327     | 1.928E-74 | -2.9956  | down      | hypothetical protein MIMGU_mgv1a019874mg [Erythranthe diffusa]                     |
| c49506.graph_c0 | 59.4601009    | 59.1284323    | 59.440856     | 55.5103041     | 54.0225327     | 55.1630561     | 1.52E-49  | -1.20281 | down      | PREDICTED: cullin-4 [Sesamum indicum]                                              |
| c49508.graph_c0 | 3.61428907    | 3.54093146    | 3.09633636    | 1.75122964     | 1.5475537      | 1.67222127     | 6.435E-26 | -2.13264 | down      | PREDICTED: uncharacterized protein LOC103541621 [Prunus pyramidalis]               |
| c49510.graph_c0 | 48.9470891    | 48.6587011    | 50.5954309    | 16.247856      | 16.0691692     | 17.3587337     | 5.66E-218 | -2.6676  | down      | PREDICTED: nuclear valosin-containing protein-like [Sesamum indicum]               |
| c49511.graph_c0 | 16.1213842    | 16.5432193    | 15.4506612    | 119.623955     | 122.666554     | 124.211821     | 1.29E-114 | 1.83944  | up        | PREDICTED: L-ascorbate oxidase homolog [Sesamum indicum]                           |
| c49511.graph_c1 | 0.56510112    | 0.50910029    | 0.36308866    | 10.0213787     | 9.60461731     | 10.1211626     | 3.279E-23 | 3.28628  | up        | hypothetical protein MIMGU_mgv1a004264mg [Erythranthe diffusa]                     |
| c49512.graph_c0 | 2.15633271    | 2.53388185    | 2.71073436    | 1.66941954     | 1.59961479     | 2.08505007     | 2.752E-07 | -1.55893 | down      | PREDICTED: lipoxygenase homology domain-containing protein 1 [Sesamum indicum]     |
| c49514.graph_c0 | 39.179932     | 37.6256715    | 38.8145107    | 7.61015632     | 6.86225206     | 6.99927897     | 0         | -3.51949 | down      | ankyrin repeat BTB/POZ domain-containing protein [Populus trichocarpa]             |

| #ID             | 0 h-1<br>FPKM | 0 h-2<br>FPKM | 0 h-3<br>FPKM | 28 h-1<br>FPKM | 28 h-2<br>FPKM | 28 h-3<br>FPKM | FDR       | log2FC   | regulated | nr_annotation                                                                                             |
|-----------------|---------------|---------------|---------------|----------------|----------------|----------------|-----------|----------|-----------|-----------------------------------------------------------------------------------------------------------|
| c49515.graph_c0 | 35.55673      | 35.3336382    | 32.1862933    | 34.3104778     | 35.0069986     | 33.6169194     | 4.881E-41 | -1.09141 | down      | PREDICTED: LOW QUALITY PROTEIN: cytokinin dehydrogenase 5 [Sesamum indicum]                               |
| c49519.graph_c0 | 1.73371723    | 2.23782134    | 1.87612234    | 14.2253655     | 11.9160377     | 13.2583059     | 1.11E-15  | 1.66172  | up        | PREDICTED: synaptotagmin-5 [Sesamum indicum]                                                              |
| c49520.graph_c0 | 14.0244251    | 14.0916445    | 11.2637135    | 72.1222867     | 64.4573107     | 62.6632927     | 1.354E-25 | 1.25098  | up        | -                                                                                                         |
| c49521.graph_c0 | 81.4697907    | 83.8754225    | 77.4490231    | 80.9684015     | 78.2645688     | 80.1096169     | 1.738E-42 | -1.11039 | down      | PREDICTED: rubisco accumulation factor 1, chloroplastic [Sesamum indicum]                                 |
| c49523.graph_c2 | 75.5408435    | 80.3946368    | 71.7848138    | 44.4785102     | 39.1404121     | 42.8906008     | 1.29E-125 | -1.93748 | down      | PREDICTED: pentatricopeptide repeat-containing protein At2g34400 [Sesamum indicum]                        |
| c49527.graph_c0 | 2.00300178    | 2.38331079    | 2.47680691    | 12.4976494     | 11.5074097     | 11.9910313     | 2.415E-12 | 1.29814  | up        | PREDICTED: fe-S cluster assembly factor HCF101, chloroplastic [Sesamum indicum]                           |
| c49528.graph_c0 | 156.84621     | 160.007235    | 149.925649    | 119.558906     | 110.000175     | 120.441529     | 2.347E-77 | -1.50497 | down      | hypothetical protein MIMGU_mgv1a021345mg [Erythranthe outtata]                                            |
| c49528.graph_c2 | 1107.05383    | 1085.44464    | 1217.30885    | 423.461014     | 474.398558     | 459.813344     | 6.999E-57 | -2.42044 | down      | PREDICTED: LOW QUALITY PROTEIN: pre-mRNA-splicing factor 38B-like [Sesamum indicum]                       |
| c49537.graph_c0 | 24.4895838    | 17.9551482    | 19.4714571    | 94.9472474     | 98.1443084     | 97.6831316     | 2.121E-28 | 1.14331  | up        | -                                                                                                         |
| c49537.graph_c4 | 94.5968071    | 92.4953245    | 92.3043667    | 51.6509733     | 46.9281132     | 47.822915      | 3.79E-135 | -2.02272 | down      | PREDICTED: uncharacterized protein LOC105163060 [Sesamum indicum]                                         |
| c49541.graph_c1 | 0.23905379    | 0.65805621    | 0.49918958    | 5.60320907     | 5.39252877     | 4.53672965     | 3.25E-16  | 2.37938  | up        | PREDICTED: CBL-interacting serine/threonine-protein kinase 1-like [Sesamum indicum]                       |
| c49548.graph_c1 | 6.92287001    | 7.01902714    | 7.48346679    | 6.43513993     | 5.61535056     | 5.86775236     | 4.582E-21 | -1.34945 | down      | PREDICTED: 4-hydroxy-3-methylbut-2-enyl diphosphate reductase, chloroplastic-like [Sesamum indicum]       |
| c49548.graph_c2 | 5.73956642    | 5.68147691    | 6.84289003    | 31.3324783     | 35.0280664     | 33.6040248     | 9.056E-36 | 1.35938  | up        | hypothetical protein MIMGU_mgv1a0104/2mg [Erythranthe outtata]                                            |
| c49549.graph_c0 | 18.8673114    | 20.0549468    | 16.7216065    | 16.1108302     | 17.0894427     | 15.7755671     | 3.771E-34 | -1.27326 | down      | PREDICTED: uncharacterized protein LOC105168432 [Sesamum indicum]                                         |
| c49552.graph_c0 | 0             | 0             | 0             | 3.85566822     | 5.75172444     | 6.90794721     | 2.477E-14 | Inf      | up        | predicted protein [Physcomitrella patens]                                                                 |
| c49554.graph_c0 | 0.70548194    | 0.82388644    | 0.65474661    | 4.38677734     | 3.34357353     | 3.7887704      | 7.483E-05 | 1.30992  | up        | PREDICTED: uncharacterized protein At4g17910 isoform X1 [Sesamum indicum]                                 |
| c49560.graph_c0 | 0.21581469    | 0.21603079    | 0.34182586    | 1.19645911     | 1.11981322     | 1.0685732      | 6.254E-07 | 1.0319   | up        | PREDICTED: anaphase-promoting complex subunit 1 [Sesamum indicum]                                         |
| c49561.graph_c1 | 0.37164562    | 0.31690402    | 0.35376247    | 3.39137976     | 3.13435985     | 3.29794876     | 1.243E-18 | 2.14627  | up        | PREDICTED: probable inactive leucine-rich repeat receptor-like protein kinase At3g03770 [Sesamum indicum] |
| c49563.graph_c0 | 2.39110668    | 1.43610061    | 0.73744002    | 28.5006179     | 32.13535       | 28.7016423     | 1.722E-37 | 3.21253  | up        | -                                                                                                         |
| c49567.graph_c0 | 2.64733068    | 0.75082811    | 1.13397491    | 8.62622332     | 13.7532292     | 19.075756      | 0.0021932 | 2.11489  | up        | predicted protein [Hordeum vulgare subsp. vulgare]                                                        |
| c49570.graph_c2 | 4.23444696    | 5.16589993    | 2.89076075    | 0.96174114     | 0.95519828     | 2.04040958     | 2.597E-08 | -2.71655 | down      | -                                                                                                         |
| c49570.graph_c3 | 14.2008194    | 12.9441583    | 12.5383697    | 7.04020257     | 7.25151003     | 7.20882188     | 3.831E-78 | -1.97329 | down      | PREDICTED: DNA polymerase kappa isoform X1 [Sesamum indicum]                                              |
| c49571.graph_c1 | 7.09935531    | 7.53758046    | 6.65921984    | 7.26002936     | 6.71011489     | 6.71510655     | 9.6E-29   | -1.13164 | down      | PREDICTED: uncharacterized protein LOC105156089 isoform X1 [Sesamum indicum]                              |

| #ID             | 0 h-1<br>FPKM | 0 h-2<br>FPKM | 0 h-3<br>FPKM | 28 h-1<br>FPKM | 28 h-2<br>FPKM | 28 h-3<br>FPKM | FDR       | log2FC   | regulated | nr_annotation                                                                                 |
|-----------------|---------------|---------------|---------------|----------------|----------------|----------------|-----------|----------|-----------|-----------------------------------------------------------------------------------------------|
| c49571.graph_c2 | 25.2670932    | 33.5799508    | 20.450877     | 167.415292     | 247.828861     | 191.729776     | 1.183E-08 | 1.84836  | up        | PREDICTED: cannabidiolic acid synthase-like [Sesamum indicum]                                 |
| c49571.graph_c4 | 68.4677408    | 70.6447687    | 66.3012319    | 33.7762522     | 34.5853375     | 33.7939624     | 3.84E-145 | -2.09787 | down      | PREDICTED: scarecrow-like protein 21 [Sesamum indicum]                                        |
| c49573.graph_c0 | 0.83758354    | 0.52401391    | 0.134541      | 10.5009529     | 8.51949717     | 9.5621633      | 5.187E-13 | 3.18261  | up        | -                                                                                             |
| c49576.graph_c0 | 1.35331597    | 1.5882351     | 1.25932265    | 22.3849754     | 23.8863583     | 23.0538519     | 3.05E-102 | 2.95539  | up        | PREDICTED: DNA (cytosine-5)-methyltransferase 1B-like [Sesamum indicum]                       |
| c49584.graph_c0 | 11.8956093    | 11.6240086    | 11.2827666    | 9.46905652     | 11.8951934     | 12.1779082     | 1.478E-06 | -1.14268 | down      | -                                                                                             |
| c49585.graph_c0 | 0             | 0             | 0             | 3.27883405     | 5.01837417     | 7.21080365     | 8.141E-10 | Inf      | up        | 60S ribosomal protein L5 [Rozella allomycis CSF55]                                            |
| c49586.graph_c0 | 0.29568552    | 0.0739954     | 0             | 2.20275092     | 2.13440518     | 2.32350289     | 3.928E-08 | 3.1082   | up        | PREDICTED: probable polyamine oxidase 4 [Musa acuminata subsp. malaccensis]                   |
| c49587.graph_c2 | 7.65362216    | 7.45097629    | 7.79102712    | 6.43517451     | 7.03151947     | 6.74626405     | 3.954E-20 | -1.27073 | down      | PREDICTED: psbP domain-containing protein 5, chloroplastic [Sesamum indicum]                  |
| c49592.graph_c3 | 45.4048134    | 48.163729     | 45.9809059    | 38.9432325     | 40.2614798     | 42.8699625     | 1.51E-48  | -1.2832  | down      | PREDICTED: DNA annealing helicase and endonuclease ZRANB3 isoform X1 [Sesamum indicum]        |
| c49593.graph_c0 | 1.15023478    | 1.08365794    | 0.95641585    | 12.6872867     | 11.189025      | 11.7972883     | 2.689E-16 | 2.39485  | up        | -                                                                                             |
| c49594.graph_c0 | 1.11344498    | 0.86288511    | 1.06157679    | 13.8354858     | 12.892838      | 12.9085357     | 8.688E-36 | 2.615    | up        | hypothetical protein MIMGU_mgv1a0042561mg, partial [Erythranthe guttata]                      |
| c49595.graph_c0 | 15.9516749    | 15.9833334    | 15.1423354    | 4.58960208     | 4.74038448     | 4.99033942     | 2.81E-192 | -2.80652 | down      | PREDICTED: uncharacterized protein LOC105169231 [Sesamum indicum]                             |
| c49596.graph_c0 | 37.6199032    | 36.6981452    | 37.258031     | 32.9922071     | 33.1433934     | 32.5109115     | 1.264E-51 | -1.26827 | down      | PREDICTED: probable serine/threonine-protein kinase DDB_G0282963 isoform X2 [Sesamum indicum] |
| c49599.graph_c0 | 13.7381142    | 5.44885449    | 8.32736824    | 0              | 0              | 0              | 3.504E-14 | -Inf     | down      | --                                                                                            |
| c49600.graph_c2 | 96.4460323    | 99.0295844    | 86.5096975    | 68.1601754     | 65.5691105     | 71.1337099     | 8.714E-83 | -1.54968 | down      | PREDICTED: transcription initiation factor TFIID subunit 15b [Sesamum indicum]                |
| c49602.graph_c0 | 0             | 0             | 0             | 5.16801612     | 4.03434815     | 5.40310678     | 3.923E-19 | Inf      | up        | sporamin A [Ipomoea trifida]                                                                  |
| c49603.graph_c0 | 730.120419    | 773.602999    | 730.564182    | 156.77878      | 163.043159     | 164.727888     | 4.14E-192 | -3.29538 | down      | PREDICTED: GRIP and coiled-coil domain-containing protein 2-like [Sesamum indicum]            |
| c49607.graph_c1 | 25.1913399    | 27.4172837    | 22.9153595    | 25.2552142     | 24.2057411     | 23.2881814     | 1.618E-28 | -1.14333 | down      | PREDICTED: uncharacterized protein LOC105164316 isoform X1 [Sesamum indicum]                  |
| c49610.graph_c2 | 112.899898    | 116.166523    | 105.436952    | 99.6670099     | 91.6932864     | 89.6705526     | 1.379E-59 | -1.34109 | down      | PREDICTED: alpha,alpha-trehalose-phosphate synthase [UDP-forming] 1-like [Sesamum indicum]    |
| c49611.graph_c0 | 38.1760675    | 36.995986     | 33.0701077    | 38.6362378     | 35.5859705     | 35.9779877     | 4.643E-41 | -1.06296 | down      | PREDICTED: nipped-B-like protein isoform X2 [Sesamum indicum]                                 |
| c49616.graph_c0 | 23.0603137    | 19.6015507    | 20.0315271    | 519.610012     | 479.726722     | 491.805042     | 0         | 3.48286  | up        | hypothetical protein MIMGU_mgv1a012029mg [Erythranthe guttata]                                |
| c49618.graph_c3 | 1.60934337    | 1.93314586    | 2.06806995    | 0.04678646     | 0.12673136     | 0.07635474     | 2.586E-26 | -5.58367 | down      | -                                                                                             |
| c49624.graph_c0 | 0             | 0             | 0             | 8.59062201     | 9.37755305     | 17.0284887     | 2.61E-14  | Inf      | up        | -                                                                                             |

| #ID             | 0 h-1<br>FPKM | 0 h-2<br>FPKM | 0 h-3<br>FPKM | 28 h-1<br>FPKM | 28 h-2<br>FPKM | 28 h-3<br>FPKM | FDR       | log2FC   | regulated | nr_annotation                                                                                       |
|-----------------|---------------|---------------|---------------|----------------|----------------|----------------|-----------|----------|-----------|-----------------------------------------------------------------------------------------------------|
| c49634.graph_c0 | 5.48318464    | 5.36449705    | 4.78242716    | 22.8289416     | 22.6638643     | 21.7770776     | 2.115E-19 | 1.01662  | up        | PREDICTED: uncharacterized protein AT1G04910 [Sesamum indicum]                                      |
| c49635.graph_c0 | 7.04059481    | 7.0476449     | 7.26979297    | 4.33674903     | 4.63377784     | 4.72649893     | 2.013E-69 | -1.7317  | down      | PREDICTED: uncharacterized protein LOC105155337 [Sesamum indicum]                                   |
| c49636.graph_c0 | 19.5286373    | 16.1401193    | 16.4273663    | 2.61455546     | 1.98130048     | 2.97159929     | 9.448E-96 | -3.87052 | down      | -                                                                                                   |
| c49641.graph_c0 | 26.1821501    | 28.1659934    | 21.1416593    | 13.7570039     | 11.938194      | 13.8385157     | 1.006E-22 | -2.02034 | down      | PREDICTED: LOW QUALITY PROTEIN: auxin transport protein BIG [Sesamum indicum]                       |
| c49643.graph_c2 | 9.02041435    | 7.85418558    | 9.53086253    | 81.7520943     | 79.7902917     | 80.8048927     | 1.12E-123 | 2.10647  | up        | PREDICTED: phosphoglucomutase, cytoplasmic [Sesamum indicum]                                        |
| c49647.graph_c0 | 5.62087615    | 3.34073711    | 3.72438433    | 0.19149471     | 0.28816961     | 0.26043019     | 1.229E-16 | -5.18547 | down      | PREDICTED: uncharacterized protein LOC105167219 [Sesamum indicum]                                   |
| c49648.graph_c1 | 157.417783    | 145.413425    | 153.844003    | 1524.52669     | 1481.09805     | 1496.59966     | 5.32E-131 | 2.21094  | up        | PREDICTED: uncharacterized protein LOC105179524 [Sesamum indicum]                                   |
| c49659.graph_c0 | 48.105363     | 49.030048     | 48.4551956    | 18.7342798     | 17.7413106     | 19.9932143     | 7.13E-145 | -2.45649 | down      | hypothetical protein MIMGU_mgv1a000/45mg [Erythranthe diffusa]                                      |
| c49661.graph_c0 | 0             | 0             | 0             | 0.80357958     | 0.92021866     | 1.45536605     | 2.046E-08 | Inf      | up        | transferrin-like protein IDI-100 [Dunaliella salina]                                                |
| c49662.graph_c0 | 0             | 0             | 0             | 1.37287283     | 1.9532704      | 3.11464287     | 2.909E-10 | Inf      | up        | predicted protein [Hordeum vulgare subsp. vulgare]                                                  |
| c49663.graph_c0 | 0.15239218    | 0.15254478    | 0.32638331    | 3.35965204     | 4.53350888     | 3.34396481     | 1.13E-11  | 3.05112  | up        | PREDICTED: uncharacterized protein LOC105174845 isoform X2 [Sesamum indicum]                        |
| c49668.graph_c0 | 4.20392411    | 4.96343975    | 5.84084981    | 3.52544748     | 3.24209572     | 4.74128769     | 3.268E-06 | -1.47572 | down      | NADH-ubiquinone oxidoreductase chain [Medicago truncatula]                                          |
| c49671.graph_c1 | 0.14142313    | 0.18875299    | 0.24231243    | 4.24846797     | 3.77409779     | 4.1376923      | 1.017E-13 | 3.31216  | up        | PREDICTED: systemin receptor SR160-like [Sesamum indicum]                                           |
| c49671.graph_c2 | 37.6918059    | 37.214366     | 33.5741401    | 20.353111      | 20.641786      | 20.1270671     | 1.6E-107  | -1.91683 | down      | PREDICTED: uncharacterized protein LOC104231501 [Nicotiana glauca]                                  |
| c49671.graph_c3 | 35.6883239    | 40.5239555    | 29.5534999    | 202.92071      | 202.038269     | 185.343123     | 3.415E-47 | 1.39235  | up        | PREDICTED: receptor-like protein kinase BRI1-like 3 [Sesamum indicum]                               |
| c49671.graph_c5 | 4.50009095    | 5.35161536    | 3.3609407     | 0.69885474     | 0.8329204      | 0.50182859     | 2.92E-19  | -3.78837 | down      | -                                                                                                   |
| c49674.graph_c2 | 1.3440458     | 1.02064195    | 1.78670904    | 47.1243378     | 38.3821727     | 51.6189239     | 3.082E-36 | 3.95135  | up        | PREDICTED: NAC domain-containing protein 100-like [Sesamum indicum]                                 |
| c49679.graph_c2 | 56.1167668    | 56.1167863    | 54.5168739    | 22.4319385     | 20.769492      | 20.434231      | 6.13E-156 | -2.48014 | down      | hypothetical protein MIMGU_mgv1a010158mg [Erythranthe diffusa]                                      |
| c49680.graph_c0 | 70.0135872    | 73.9470045    | 61.7497552    | 61.749994      | 55.9684835     | 61.5094897     | 9.187E-33 | -1.28728 | down      | OSJNBa0006B20.7 [Oryza sativa Japonica Group]                                                       |
| c49682.graph_c0 | 52.9688171    | 51.8598523    | 52.818245     | 50.2466469     | 52.4779233     | 53.0104319     | 8.497E-39 | -1.10806 | down      | hypothetical protein MIMGU_mgv1a02/055mg [Erythranthe diffusa]                                      |
| c49684.graph_c2 | 4.49946205    | 3.54858052    | 2.45296413    | 3.17108663     | 0.98422291     | 3.55792359     | 0.0013469 | -1.52509 | down      | -                                                                                                   |
| c49686.graph_c0 | 7.96232432    | 7.16642619    | 7.24576751    | 6.80527971     | 7.51247222     | 7.6810473      | 1.017E-24 | -1.11376 | down      | PREDICTED: DNA repair protein REV1 [Sesamum indicum]                                                |
| c49686.graph_c1 | 2.64320037    | 2.96176918    | 2.71222412    | 15.1677943     | 15.1836935     | 14.8685331     | 1.597E-27 | 1.35215  | up        | PREDICTED: probable mitochondrial import inner membrane translocase subunit TIM21 [Sesamum indicum] |
| c49687.graph_c2 | 60.988951     | 83.4833389    | 68.2567925    | 0.50420752     | 0.51463283     | 0.44720568     | 3.897E-89 | -8.27256 | down      | PREDICTED: uncharacterized protein LOC103716664 [Phoenix dactylifera]                               |

| #ID             | 0 h-1<br>FPKM | 0 h-2<br>FPKM | 0 h-3<br>FPKM | 28 h-1<br>FPKM | 28 h-2<br>FPKM | 28 h-3<br>FPKM | FDR       | log2FC   | regulated | nr_annotation                                                                               |
|-----------------|---------------|---------------|---------------|----------------|----------------|----------------|-----------|----------|-----------|---------------------------------------------------------------------------------------------|
| c49689.graph_c1 | 36.0723116    | 38.3812911    | 34.6006034    | 28.1631954     | 28.563388      | 26.6014831     | 2.152E-72 | -1.47831 | down      | PREDICTED: TBC1 domain family member 5 homolog A-like [Sesamum indicum]                     |
| c49693.graph_c0 | 3.33164391    | 3.50325886    | 3.41717988    | 19.6712573     | 19.4762544     | 18.8431654     | 2.592E-42 | 1.40899  | up        | PREDICTED: beta-galactosidase 8-like [Sesamum indicum]                                      |
| c49701.graph_c0 | 2.64981634    | 3.46861427    | 2.92490983    | 17.0118627     | 15.9174507     | 14.9896466     | 2.32E-17  | 1.31432  | up        | hypothetical protein MIMGU_mgv1a007501mg [Erythranthe                                       |
| c49702.graph_c0 | 335.328193    | 327.490437    | 321.635988    | 203.147167     | 196.258846     | 198.598085     | 3.064E-93 | -1.80923 | down      | hypothetical protein MIMGU_mgv1a004852mg [Erythranthe                                       |
| c49703.graph_c0 | 2.4340113     | 2.90390676    | 2.50951467    | 0.87422766     | 0.63147649     | 0.74693264     | 2.275E-54 | -2.89076 | down      | PREDICTED: stromal 70 kDa heat shock-related protein, chloroplastic-like [Sesamum indicum]  |
| c49707.graph_c0 | 250.126673    | 228.811187    | 263.601089    | 265.883548     | 252.908002     | 262.1603       | 8.095E-17 | -1.01867 | down      | PREDICTED: uncharacterized protein LOC105178836 [Sesamum indicum]                           |
| c49707.graph_c1 | 18.2925959    | 17.133783     | 15.2233931    | 13.3266079     | 12.6900446     | 13.5090567     | 3.257E-36 | -1.44585 | down      | PREDICTED: non-structural maintenance of chromosomes element 1 homolog [Sesamum indicum]    |
| c49708.graph_c0 | 0             | 0             | 0             | 266.103206     | 225.323725     | 238.680366     | 3.32E-172 | Inf      | up        | -                                                                                           |
| c49712.graph_c0 | 18.1389785    | 15.6828983    | 15.8816023    | 78.5470712     | 75.2627208     | 73.0019455     | 1.017E-34 | 1.10071  | up        | PREDICTED: uncharacterized protein LOC105874877 [Brassica                                   |
| c49716.graph_c0 | 0.35524791    | 0.35560364    | 0.15216921    | 8.26214837     | 8.1593152      | 6.95252828     | 3.953E-20 | 3.67754  | up        | -                                                                                           |
| c49716.graph_c1 | 1.92697895    | 2.36729684    | 3.03902703    | 1.27319745     | 1.26453572     | 0.5714053      | 3.247E-07 | -2.33728 | down      | NADH dehydrogenase subunit 5 [Arabidopsis thaliana]                                         |
| c49722.graph_c0 | 3.66879225    | 4.42579235    | 4.31159088    | 3.28179331     | 2.77795468     | 2.77089976     | 1.213E-18 | -1.58282 | down      | hypothetical protein VITISV_035665 [Vitis vinifera]                                         |
| c49726.graph_c0 | 0.02036919    | 0.04077918    | 0.05235044    | 0.53295166     | 0.66834081     | 0.38656374     | 4.412E-07 | 2.70391  | up        | unnamed protein product [Coffea canephora]                                                  |
| c49738.graph_c0 | 0             | 0             | 0             | 1.01603004     | 0.982907       | 1.2139986      | 6.947E-11 | Inf      | up        | F-type H <sup>+</sup> -transporting ATPase subunit gamma [Galdieria                         |
| c49740.graph_c0 | 375.689845    | 356.186915    | 392.598077    | 231.021034     | 252.948096     | 247.741283     | 2.381E-55 | -1.71118 | down      | putative galactinol synthase family protein [Populus trichocarpa]                           |
| c49740.graph_c1 | 0.70167913    | 1.05357264    | 1.40888354    | 5.13163703     | 5.35285715     | 4.47346778     | 6.678E-05 | 1.14173  | up        | PREDICTED: RPM1-interacting protein 4-like [Sesamum indicum]                                |
| c49740.graph_c2 | 506.353189    | 494.623171    | 508.834806    | 58.0937301     | 59.9058168     | 59.2442868     | 0         | -4.18125 | down      | galactinol synthase [Boea hygrometrica]                                                     |
| c49746.graph_c0 | 1.10415771    | 1.47368448    | 0.15765404    | 4.9933051      | 4.58899502     | 5.31139681     | 0.006237  | 1.37003  | up        | -                                                                                           |
| c49750.graph_c0 | 9.78968098    | 8.16623655    | 8.38675176    | 7.11508371     | 7.37599474     | 6.02088169     | 1.551E-06 | -1.45079 | down      | -                                                                                           |
| c49751.graph_c1 | 34.6220885    | 38.2947594    | 36.2255521    | 20.7317813     | 20.6174141     | 19.6537405     | 1.661E-87 | -1.93034 | down      | PREDICTED: polycomb group protein EMBRYONIC FLOWER 2 isoform X5 [Sesamum indicum]           |
| c49754.graph_c1 | 3.08556282    | 3.12259378    | 3.05005415    | 15.0202854     | 15.0638436     | 14.3779288     | 2.321E-24 | 1.17319  | up        | PREDICTED: putative pentatricopeptide repeat-containing protein At1g74580 [Sesamum indicum] |
| c49759.graph_c0 | 3.77118598    | 4.70019809    | 2.89817177    | 16.6333567     | 17.2747552     | 15.2171926     | 3.19E-09  | 1.02401  | up        | PREDICTED: methyltransferase-like protein 16 homolog isoform X1 [Sesamum indicum]           |
| c49761.graph_c1 | 73.5638926    | 70.1463179    | 70.1180036    | 74.8788213     | 72.577558      | 71.8781462     | 1.297E-37 | -1.05346 | down      | 50S ribosomal protein L2 [Medicago truncatula]                                              |
| c49762.graph_c2 | 37.5980002    | 36.279015     | 36.8541706    | 17.1581922     | 15.6213408     | 15.6343883     | 4.27E-159 | -2.28409 | down      | PREDICTED: autophagy-related protein 18a-like [Sesamum indicum]                             |
| c49770.graph_c0 | 0             | 0             | 0             | 12.6216705     | 17.3733678     | 25.6638752     | 1.029E-17 | Inf      | up        | Elongation factor 1-alpha [Auxenochlorella protothecoides]                                  |
| c49775.graph_c0 | 451.031763    | 419.995523    | 492.212876    | 365.386363     | 306.362312     | 376.237132     | 3.34E-19  | -1.47068 | down      | -                                                                                           |



| #ID             | 0 h-1<br>FPKM | 0 h-2<br>FPKM | 0 h-3<br>FPKM | 28 h-1<br>FPKM | 28 h-2<br>FPKM | 28 h-3<br>FPKM | FDR       | log2FC   | regulated | nr_annotation                                                                       |
|-----------------|---------------|---------------|---------------|----------------|----------------|----------------|-----------|----------|-----------|-------------------------------------------------------------------------------------|
| c49777.graph_c1 | 0.77990659    | 0             | 0.66814057    | 5.29042843     | 6.31214826     | 6.83516513     | 1.591E-09 | 2.57892  | up        | -                                                                                   |
| c49784.graph_c1 | 46.7565191    | 48.4307929    | 47.2843138    | 29.3101325     | 28.8801808     | 29.5580085     | 2.55E-106 | -1.78974 | down      | PREDICTED: BTB/POZ domain-containing protein POB1-like isoform X1 [Sesamum indicum] |
| c49785.graph_c0 | 863.708163    | 889.458883    | 721.286403    | 371.212294     | 343.999938     | 346.894949     | 1.506E-52 | -2.3084  | down      | -                                                                                   |
| c49787.graph_c1 | 100.509869    | 97.815778     | 93.5030827    | 61.2758176     | 57.0906079     | 56.1944228     | 7.34E-113 | -1.83124 | down      | PREDICTED: uncharacterized protein LOC105163549 [Sesamum indicum]                   |
| c49790.graph_c0 | 5.88601469    | 6.66791612    | 5.64514914    | 32.0948456     | 28.9974782     | 27.6194876     | 1.121E-25 | 1.19524  | up        | PREDICTED: UDP-glycosyltransferase /GPI-like [Sesamum indicum]                      |
| c49795.graph_c1 | 35.7040434    | 37.0489456    | 35.9934222    | 12.1509531     | 12.4730918     | 14.1680913     | 2.24E-195 | -2.57701 | down      | PREDICTED: putative receptor-like protein kinase At5g39000 [Sesamum indicum]        |
| c49798.graph_c2 | 16.1605151    | 17.7541267    | 14.7744625    | 13.6386527     | 12.282768      | 12.7502245     | 3.594E-34 | -1.42142 | down      | PREDICTED: leukocyte receptor cluster member 8 homolog isoform X1 [Sesamum indicum] |
| c49809.graph_c0 | 3.83310858    | 2.33046664    | 2.86887083    | 0              | 0              | 0              | 7.958E-55 | -Inf     | down      | --                                                                                  |
| c49812.graph_c0 | 0             | 0             | 0             | 1.16255272     | 1.3901116      | 1.41013092     | 2.359E-14 | Inf      | up        | Short-chain dehydrogenase/reductase SDR [Macrophomina phaseolina MS6]               |
| c49818.graph_c0 | 75.8049888    | 74.9820914    | 77.9369225    | 65.041721      | 60.6728199     | 65.6278437     | 1.213E-61 | -1.34814 | down      | PREDICTED: uncharacterized protein LOC105158481 isoform X1 [Sesamum indicum]        |
| c49823.graph_c0 | 10.8938452    | 11.1220586    | 9.82721226    | 5.30707616     | 5.16736509     | 4.81625251     | 3.37E-127 | -2.14784 | down      | PREDICTED: uncharacterized protein LOC105179488 isoform X2 [Sesamum indicum]        |
| c49823.graph_c2 | 2.6870455     | 2.21654184    | 2.68563544    | 11.8079885     | 12.0166444     | 12.4092218     | 2.613E-15 | 1.16441  | up        | PREDICTED: transmembrane protein 87B [Sesamum indicum]                              |
| c49825.graph_c0 | 1.51217241    | 0.86496378    | 0.83280061    | 9.00164614     | 8.50567236     | 7.64420514     | 1.486E-08 | 1.88563  | up        | PREDICTED: protein CHROMATIN REMODELING 4 [Sesamum indicum]                         |
| c49837.graph_c0 | 20.6940312    | 22.6322339    | 19.4247506    | 5.30197718     | 5.8292973      | 5.50361364     | 6.29E-134 | -3.00503 | down      | PREDICTED: leucine-rich repeat receptor protein kinase EXS [Sesamum indicum]        |
| c49840.graph_c0 | 0             | 0             | 0             | 3.84158186     | 4.99476706     | 7.04680431     | 4.417E-14 | Inf      | up        | predicted protein [Hordeum vulgare subsp. vulgare]                                  |
| c49842.graph_c0 | 2.06303875    | 1.6826778     | 1.27644904    | 12.9670738     | 12.4100335     | 11.0115177     | 4.298E-18 | 1.77157  | up        | -                                                                                   |
| c49847.graph_c1 | 13.4277615    | 12.5970736    | 12.170338     | 12.1636651     | 12.6215328     | 12.4260496     | 1.106E-23 | -1.12709 | down      | hypothetical protein JCGZ_09714 [Jatropha curcas]                                   |
| c49857.graph_c2 | 1.87316663    | 3.303646      | 2.98021073    | 1.4262356      | 0.64387851     | 1.11089676     | 2.208E-06 | -2.45199 | down      | -                                                                                   |
| c49858.graph_c0 | 0.04385115    | 0             | 0             | 2.03972892     | 2.96396014     | 3.47183884     | 1.216E-15 | 6.53701  | up        | protein of unknown function [Taphrina deformans PYCC 5710]                          |
| c49861.graph_c1 | 25.3056211    | 29.4924759    | 24.1567672    | 19.7932733     | 25.3838135     | 19.1526904     | 3.805E-17 | -1.38604 | down      | hypothetical protein POPTR_0001s24240g [Populus trichocarpa]                        |
| c49861.graph_c2 | 6.56471608    | 6.07534326    | 7.16257365    | 27.5829247     | 29.3427903     | 28.1636847     | 1.112E-23 | 1.0112   | up        | PREDICTED: putative late blight resistance protein homolog R1A-10 [Sesamum indicum] |
| c49862.graph_c0 | 1.96765452    | 2.70823414    | 3.0552877     | 1.13214664     | 0.96842109     | 1.60453366     | 1.882E-07 | -2.15425 | down      | hypothetical protein PHAVU_001G023000g [Phaseolus vulgaris]                         |
| c49865.graph_c0 | 6.60425595    | 9.71854263    | 6.7458626     | 1.92817908     | 1.77800673     | 1.60685452     | 4.274E-14 | -3.20852 | down      | PREDICTED: monosaccharide-sensing protein 2-like [Sesamum indicum]                  |

| #ID             | 0 h-1<br>FPKM | 0 h-2<br>FPKM | 0 h-3<br>FPKM | 28 h-1<br>FPKM | 28 h-2<br>FPKM | 28 h-3<br>FPKM | FDR       | log2FC   | regulated | nr_annotation                                                                                               |
|-----------------|---------------|---------------|---------------|----------------|----------------|----------------|-----------|----------|-----------|-------------------------------------------------------------------------------------------------------------|
| c49865.graph_c1 | 4.24873402    | 4.04552563    | 3.8618037     | 83.6007438     | 92.2804418     | 74.6705333     | 2.027E-61 | 3.27508  | up        | PREDICTED: uncharacterized protein LOC105161592 [Sesamum indicum]                                           |
| c49872.graph_c2 | 145.743505    | 148.195115    | 144.080977    | 118.211066     | 112.70649      | 111.419484     | 2.073E-70 | -1.44605 | down      | PREDICTED: putative RNA polymerase II subunit B1 CTD phosphatase RPAP2 homolog isoform X3 [Sesamum indicum] |
| c49874.graph_c0 | 0.28889397    | 0.49574272    | 0.21213725    | 3.50943962     | 3.1957778      | 2.64339145     | 1.868E-07 | 2.1428   | up        | hypothetical protein MIMGU_mgv11b019086mg [Erythranthe guttata]                                             |
| c49876.graph_c0 | 12.4322794    | 11.0334706    | 11.8172777    | 60.7348689     | 62.2813791     | 58.2814167     | 3.467E-44 | 1.27083  | up        | PREDICTED: serine/threonine-protein kinase H11 [Sesamum indicum]                                            |
| c49876.graph_c4 | 4.31846532    | 5.22337078    | 6.01184882    | 3.13863571     | 3.66044612     | 3.30808893     | 5.928E-06 | -1.71655 | down      | -                                                                                                           |
| c49876.graph_c7 | 0             | 0             | 0             | 4.69398128     | 3.83776279     | 3.136583       | 1.633E-20 | Inf      | up        | PREDICTED: squalene monooxygenase-like [Sesamum indicum]                                                    |
| c49876.graph_c8 | 0.32663153    | 0.1089862     | 0.34977871    | 4.47091873     | 1.92910003     | 2.16311171     | 0.0092253 | 2.35152  | up        | PREDICTED: uncharacterized protein LOC105160027 [Sesamum indicum]                                           |
| c49876.graph_c9 | 5.97661245    | 8.10799347    | 6.26541295    | 40.579933      | 43.4001897     | 44.259347      | 1.334E-25 | 1.56574  | up        | PREDICTED: uncharacterized protein LOC105160027 [Sesamum indicum]                                           |
| c49878.graph_c0 | 0             | 0             | 0             | 0.92579407     | 1.1507267      | 2.18783389     | 2.848E-07 | Inf      | up        | --                                                                                                          |
| c49879.graph_c0 | 10.3102536    | 9.60881382    | 9.9531297     | 3.21147125     | 3.49958656     | 3.28319817     | 3.287E-96 | -2.67009 | down      | PREDICTED: protein RMD5 homolog A-like isoform X1 [Sesamum indicum]                                         |
| c49879.graph_c1 | 53.227144     | 45.1155428    | 49.1187359    | 48.6810169     | 44.5795232     | 44.7725866     | 6.823E-27 | -1.18535 | down      | -                                                                                                           |
| c49880.graph_c0 | 0.68619741    | 0.75335723    | 0.56889732    | 0.19305458     | 0.05810339     | 0.18378612     | 4.199E-16 | -3.29232 | down      | PREDICTED: probable sulfate transporter 3.4 [Eucalyptus grandis]                                            |
| c49880.graph_c1 | 7.40400713    | 6.72698909    | 7.30528419    | 6.10530759     | 6.70476309     | 6.4648597      | 5.868E-26 | -1.24401 | down      | hypothetical protein MIMGU_mgv1a013752mg [Erythranthe guttata]                                              |
| c49886.graph_c0 | 18.3498417    | 16.2323772    | 24.67703      | 0              | 0              | 0              | 4.11E-27  | -Inf     | down      | -                                                                                                           |
| c49891.graph_c1 | 155.030149    | 154.995171    | 162.306206    | 34.5736217     | 32.9833319     | 35.1990014     | 2.33E-244 | -3.29151 | down      | PREDICTED: zinc finger protein AZF2-like [Sesamum indicum]                                                  |
| c49906.graph_c0 | 0.12087279    | 0.12099383    | 0             | 5.09527955     | 7.37675952     | 5.16129083     | 1.692E-13 | 5.11639  | up        | -                                                                                                           |
| c49906.graph_c2 | 4.29398683    | 5.73104881    | 3.88299698    | 29.5902329     | 27.7608469     | 27.4465158     | 6.145E-09 | 1.51951  | up        | PREDICTED: uncharacterized protein LOC105174944 [Sesamum indicum]                                           |
| c49906.graph_c3 | 25.4387981    | 24.9802396    | 23.9635605    | 21.5753271     | 23.5366351     | 22.5053469     | 4.131E-47 | -1.22747 | down      | PREDICTED: receptor-like protein kinase FERONIA [Sesamum indicum]                                           |
| c49907.graph_c0 | 0.20853313    | 0.24353227    | 0.17864889    | 3.66271638     | 3.42112705     | 2.94752256     | 1.275E-12 | 2.90245  | up        | hypothetical protein MIMGU_mgv1a022633mg, partial [Erythranthe guttata]                                     |
| c49909.graph_c0 | 30.2317121    | 30.0268748    | 27.2071981    | 134.881717     | 135.172926     | 123.414731     | 2.685E-40 | 1.07985  | up        | PREDICTED: putative late blight resistance protein homolog RIA-10 [Sesamum indicum]                         |
| c49911.graph_c1 | 6.96848646    | 6.68482       | 5.96985399    | 2.32130057     | 2.00064783     | 2.92734175     | 1.095E-13 | -2.52363 | down      | -                                                                                                           |
| c49912.graph_c2 | 34.5771473    | 29.1693685    | 33.6465087    | 176.190601     | 182.994643     | 173.638519     | 6.941E-63 | 1.36091  | up        | PREDICTED: translocon-associated protein subunit alpha-like [Sesamum indicum]                               |
| c49918.graph_c0 | 45.5957752    | 46.4237029    | 47.8573665    | 18.4104148     | 19.9120863     | 20.5364163     | 2.25E-158 | -2.3397  | down      | PREDICTED: uncharacterized protein At1g04910-like [Sesamum indicum]                                         |
| c49920.graph_c0 | 0.03615507    | 0.4704866     | 0.0464607     | 11.8510617     | 24.2479076     | 12.3720693     | 2.867E-08 | 5.36672  | up        | hypothetical protein MIMGU_mgv1a020088mg [Erythranthe guttata]                                              |

| #ID             | 0 h-1<br>FPKM | 0 h-2<br>FPKM | 0 h-3<br>FPKM | 28 h-1<br>FPKM | 28 h-2<br>FPKM | 28 h-3<br>FPKM | FDR       | log2FC   | regulated | nr_annotation                                                                                     |
|-----------------|---------------|---------------|---------------|----------------|----------------|----------------|-----------|----------|-----------|---------------------------------------------------------------------------------------------------|
| c49921.graph_c0 | 4.93395916    | 4.10583234    | 5.19448957    | 24.6265621     | 22.3525054     | 22.4218716     | 4.75E-13  | 1.19365  | up        | PREDICTED: transcription factor GTE1-like isoform X2 [Sesamum indicum]                            |
| c49926.graph_c0 | 0             | 0             | 0             | 7.845358       | 10.2739566     | 20.7201617     | 1.693E-07 | Inf      | up        | cysteine protease 1 [Brachiaria hybrid cultivar]                                                  |
| c49930.graph_c0 | 0             | 0             | 0             | 0.63099372     | 0.71216021     | 1.12631252     | 9.005E-08 | Inf      | up        | hypothetical protein CHLNCDRAFT_58466 [Chlorella variabilis]                                      |
| c49931.graph_c2 | 0.40644173    | 0.40684872    | 0.52229371    | 5.61259061     | 6.84576347     | 5.78504603     | 2.735E-11 | 2.67727  | up        | PREDICTED: ethylene-responsive transcription factor CRF2-like [Sesamum indicum]                   |
| c49931.graph_c4 | 0.18640286    | 0.06219651    | 0.19961255    | 4.17719288     | 4.17935553     | 4.27451257     | 1.459E-21 | 3.72258  | up        | PREDICTED: uncharacterized protein LOC105177468 [Sesamum indicum]                                 |
| c49932.graph_c0 | 3.60354619    | 1.69085372    | 2.46005912    | 56.6366665     | 47.5904829     | 55.698494      | 6.024E-49 | 3.2799   | up        | Cell wall-associated hydrolase, partial [Medicago truncatula]                                     |
| c49936.graph_c0 | 326.525351    | 327.548735    | 345.453129    | 351.01978      | 357.601457     | 353.73864      | 1.812E-31 | -1.00337 | down      | PREDICTED: pentatricopeptide repeat-containing protein At5g52850, chloroplastic [Sesamum indicum] |
| c49936.graph_c1 | 138.427737    | 146.948886    | 155.535118    | 7.31832452     | 7.94266207     | 6.67542792     | 5.09E-194 | -5.42173 | down      | PREDICTED: heat shock protein 83-like [Sesamum indicum]                                           |
| c49944.graph_c0 | 0             | 0             | 0             | 0.84998403     | 0.95931986     | 1.38716006     | 9.311E-10 | Inf      | up        | predicted protein [Hordeum vulgare subsp. vulgare]                                                |
| c49945.graph_c0 | 71.3102584    | 73.1982641    | 68.041477     | 70.5004062     | 69.6681799     | 70.8756301     | 6.709E-42 | -1.10005 | down      | PREDICTED: BEACH domain-containing protein lvsA isoform X2 [Sesamum indicum]                      |
| c49949.graph_c0 | 0             | 0             | 0             | 2.1697509      | 3.74184592     | 3.11607827     | 2.813E-16 | Inf      | up        | ATP synthase subunit alpha [Taphrina deformans PYCC 5710]                                         |
| c49950.graph_c0 | 597.243677    | 597.665692    | 607.296269    | 597.034466     | 584.804159     | 549.508372     | 4.792E-30 | -1.14897 | down      | PREDICTED: phosphoenolpyruvate carboxykinase [ATP]-like [Fragaria vesca subsp. vesca]             |
| c49955.graph_c0 | 2.30265162    | 1.21534116    | 1.56019921    | 0.12171301     | 0.10989544     | 0.07448762     | 8.865E-13 | -5.14067 | down      | predicted protein [Hordeum vulgare subsp. vulgare]                                                |
| c49963.graph_c0 | 2.83546742    | 2.2924785     | 2.24226948    | 0.63409273     | 1.07348679     | 0.25870725     | 8.864E-13 | -2.99918 | down      | -                                                                                                 |
| c49968.graph_c0 | 26.0905411    | 22.190632     | 21.8037525    | 112.473385     | 110.281436     | 106.542647     | 9.217E-30 | 1.14344  | up        | PREDICTED: uncharacterized protein LOC105161736 [Sesamum indicum]                                 |
| c49974.graph_c0 | 18.2763036    | 11.0260411    | 12.2568852    | 0.04472428     | 0.08076367     | 0.1459786      | 1.897E-31 | -8.34047 | down      | predicted protein [Hordeum vulgare subsp. vulgare]                                                |
| c49975.graph_c1 | 48.5475955    | 48.8760332    | 50.7706082    | 318.437423     | 327.347039     | 327.869967     | 2.589E-93 | 1.62484  | up        | PREDICTED: 60S ribosomal protein L3-like [Sesamum indicum]                                        |
| c49983.graph_c0 | 4.34998247    | 5.37888851    | 3.78140274    | 25.1063644     | 23.2983791     | 22.1179278     | 3.05E-13  | 1.29549  | up        | PREDICTED: uncharacterized protein LOC104590989 [Nelumbo nucifera]                                |
| c50004.graph_c1 | 19.910867     | 20.6706954    | 17.7896681    | 14.885203      | 13.773415      | 12.7763455     | 3.569E-66 | -1.58385 | down      | hypothetical protein MIMGU_mgv1a0026/4mg [Erythranthe outtata]                                    |
| c50010.graph_c0 | 49.3063131    | 50.1481665    | 45.8621427    | 289.101009     | 264.169048     | 256.468902     | 1.401E-60 | 1.38844  | up        | PREDICTED: putative GTP diphosphokinase RSH1, chloroplastic [Sesamum indicum]                     |
| c50014.graph_c2 | 27.2344229    | 32.187331     | 23.2898031    | 24.1137612     | 18.6392766     | 17.4807085     | 4.801E-11 | -1.5463  | down      | PREDICTED: uncharacterized protein LOC104210641 [Nicotiana sylvestris]                            |
| c50017.graph_c2 | 218.172584    | 227.042797    | 205.305941    | 47.9697207     | 43.3121602     | 56.073758      | 7.79E-219 | -3.23082 | down      | hypothetical protein MIMGU_mgv1a011129mg [Erythranthe outtata]                                    |
| c50017.graph_c3 | 111.650546    | 107.283219    | 107.866323    | 86.2798819     | 98.8111191     | 86.8375987     | 4.46E-62  | -1.35581 | down      | PREDICTED: bifunctional epoxide hydrolase 2 [Sesamum indicum]                                     |
| c50018.graph_c0 | 327.876509    | 340.304545    | 331.371981    | 58.2020006     | 55.3272262     | 60.0375082     | 0         | -3.61606 | down      | PREDICTED: uncharacterized protein LOC105455975 [Malus domestica]                                 |

| #ID             | 0 h-1<br>FPKM | 0 h-2<br>FPKM | 0 h-3<br>FPKM | 28 h-1<br>FPKM | 28 h-2<br>FPKM | 28 h-3<br>FPKM | FDR       | log2FC   | regulated | nr_annotation                                                                                      |
|-----------------|---------------|---------------|---------------|----------------|----------------|----------------|-----------|----------|-----------|----------------------------------------------------------------------------------------------------|
| c50018.graph_c5 | 236.112247    | 241.150458    | 235.173646    | 163.775877     | 161.758184     | 161.439807     | 8.773E-71 | -1.63938 | down      | PREDICTED: UBPI-associated protein 2A-like [Sesamum indicum]                                       |
| c50021.graph_c0 | 17.2431989    | 16.592825     | 16.5115092    | 14.5140366     | 13.1434335     | 13.2510402     | 5.164E-53 | -1.38971 | down      | PREDICTED: pentatricopeptide repeat-containing protein At3g53170-like isoform X1 [Sesamum indicum] |
| c50022.graph_c0 | 5.43715381    | 5.11274386    | 4.41095828    | 22.4527958     | 23.624534      | 22.5392679     | 5.974E-21 | 1.10923  | up        | PREDICTED: xyloglucan galactosyltransferase KATAMARI1 homolog [Sesamum indicum]                    |
| c50023.graph_c0 | 3.18766239    | 3.56080848    | 3.14641211    | 57.6843312     | 55.3273954     | 46.6315735     | 1.047E-52 | 2.92113  | up        | hypothetical protein MIMGU_mgv1a000846mg [Erythranthe guttata]                                     |
| c50024.graph_c0 | 5.75482065    | 5.70821429    | 4.43710343    | 2.31942545     | 2.78085444     | 2.51316738     | 1.511E-20 | -2.1499  | down      | hypothetical protein MIMGU_mgv1a022598mg, partial [Erythranthe guttata]                            |
| c50024.graph_c1 | 0.22769295    | 0.15954467    | 0.14629723    | 1.80379661     | 2.51022705     | 2.61968221     | 3.026E-11 | 2.61511  | up        | hypothetical protein CICLE_v10007524mg [Citrus clementina]                                         |
| c50026.graph_c0 | 0             | 0             | 0             | 0.67417384     | 0.66958734     | 1.10024069     | 8.951E-09 | Inf      | up        | PREDICTED: uncharacterized protein LOC100820135 [Glycine max]                                      |
| c50030.graph_c0 | 1.84634767    | 1.97259435    | 1.27756992    | 12.6191607     | 11.9181791     | 12.3818276     | 5.587E-37 | 1.77104  | up        | PREDICTED: uncharacterized protein LOC105168379 [Sesamum indicum]                                  |
| c50031.graph_c0 | 183.628845    | 188.776871    | 193.922113    | 135.110956     | 135.162        | 135.124964     | 2.28E-81  | -1.5735  | down      | PREDICTED: putative ATP-dependent RNA helicase DHX33 [Sesamum indicum]                             |
| c50036.graph_c0 | 0.3007526     | 0.07526344    | 0.09661975    | 1.3388347      | 1.01148021     | 1.36002386     | 0.0001024 | 1.89634  | up        | hypothetical protein VITISV_027174 [Vitis vinifera]                                                |
| c50039.graph_c2 | 0.18258516    | 0.18276799    | 0.11731458    | 36.493006      | 38.7009943     | 34.9214668     | 2.852E-84 | 6.74826  | up        | hypothetical protein MIMGU_mgv1a001711mg [Erythranthe guttata]                                     |
| c50042.graph_c1 | 51.2449039    | 51.0799607    | 50.3049475    | 43.5094906     | 41.1847339     | 41.6661931     | 1.504E-63 | -1.36283 | down      | PREDICTED: uncharacterized calcium-binding protein At1g02270 [Sesamum indicum]                     |
| c50042.graph_c2 | 0.61786393    | 0.49877631    | 0.43540817    | 0.08691483     | 0.02615865     | 0.03546089     | 1.459E-21 | -4.47274 | down      | PREDICTED: uncharacterized protein LOC105170683 [Sesamum indicum]                                  |
| c50043.graph_c0 | 4.21949852    | 3.25115575    | 3.60292426    | 3.93426253     | 3.46118634     | 3.73714884     | 4.112E-09 | -1.08125 | down      | hypothetical protein MIMGU_mgv1a025306mg, partial [Erythranthe guttata]                            |
| c50044.graph_c0 | 12.9025087    | 11.6519628    | 12.254956     | 60.2400454     | 62.6740235     | 67.6198445     | 2.23E-16  | 1.28219  | up        | Gag-protease-integrase-RT-RNaseH polyprotein [Glycine max]                                         |
| c50046.graph_c1 | 43.0975468    | 43.2489602    | 39.8514528    | 35.9998902     | 34.1191063     | 33.1437769     | 6.459E-63 | -1.37909 | down      | hypothetical protein VITISV_006175 [Vitis vinifera]                                                |
| c50050.graph_c0 | 3.75610476    | 4.73464599    | 4.24574644    | 28.2596787     | 28.1404571     | 25.1635007     | 6.995E-36 | 1.58701  | up        | hypothetical protein MIMGU_mgv1a001814mg [Erythranthe guttata]                                     |
| c50051.graph_c0 | 0             | 0             | 0             | 2.28765497     | 3.06935079     | 3.73341555     | 1.165E-17 | Inf      | up        | hypothetical protein GUIHDRAFT_64866 [Guillardia theta CCMP2712]                                   |
| c50052.graph_c4 | 1.27677951    | 1.38112721    | 0.89974541    | 6.06164802     | 5.81094549     | 5.94771931     | 5.849E-10 | 1.23855  | up        | hypothetical protein MIMGU_mgv1a002839mg [Erythranthe guttata]                                     |
| c50057.graph_c0 | 4.76717722    | 4.65190174    | 5.50955748    | 1.35103729     | 1.45596194     | 1.61809066     | 1.711E-39 | -2.84628 | down      | PREDICTED: transcription factor bHLH/19-like [Sesamum indicum]                                     |
| c50057.graph_c2 | 3.32285308    | 3.46738619    | 3.40391332    | 3.67950397     | 3.29139032     | 3.69960739     | 1.678E-12 | -1.02447 | down      | PREDICTED: LOW QUALITY PROTEIN: probable galacturonosyltransferase 14 [Sesamum indicum]            |
| c50057.graph_c3 | 372.787274    | 393.753475    | 357.477558    | 251.423811     | 250.470978     | 248.152746     | 2.03E-61  | -1.6735  | down      | hypothetical protein MIMGU_mgv1a006830mg [Erythranthe guttata]                                     |
| c50059.graph_c0 | 9.97944634    | 4.02014019    | 7.037552      | 42.8104144     | 35.0599462     | 45.6871        | 1.258E-06 | 1.46769  | up        | hypothetical protein AM1K_s00028p00129850 [Amborella trichopoda]                                   |
| c50061.graph_c0 | 13.5722587    | 14.8570398    | 13.3611495    | 241.702708     | 234.693648     | 225.517099     | 1.64E-210 | 2.97974  | up        | -                                                                                                  |

| #ID             | 0 h-1<br>FPKM | 0 h-2<br>FPKM | 0 h-3<br>FPKM | 28 h-1<br>FPKM | 28 h-2<br>FPKM | 28 h-3<br>FPKM | FDR       | log2FC   | regulated | nr_annotation                                                                                    |
|-----------------|---------------|---------------|---------------|----------------|----------------|----------------|-----------|----------|-----------|--------------------------------------------------------------------------------------------------|
| c50063.graph_c0 | 14.6387507    | 14.3905678    | 12.6533907    | 12.1183738     | 15.1202997     | 15.3388451     | 3.951E-13 | -1.05765 | down      | -                                                                                                |
| c50066.graph_c0 | 29.1815625    | 31.9101297    | 28.5268193    | 15.9942394     | 16.4637124     | 15.9355627     | 1.657E-83 | -1.97908 | down      | PREDICTED: flowering time control protein FPA [ <i>Vitis vinifera</i> ]                          |
| c50067.graph_c0 | 1.6672662     | 1.68614124    | 1.63448688    | 1.13680527     | 1.43248823     | 1.2232402      | 4.491E-11 | -1.48597 | down      | PREDICTED: uncharacterized protein LOC105173219 [ <i>Sesamum indicum</i> ]                       |
| c50071.graph_c0 | 28.4115149    | 27.669285     | 27.0506425    | 25.1531438     | 24.3128952     | 23.9548338     | 7.698E-53 | -1.2693  | down      | PREDICTED: uncharacterized protein LOC105171564 [ <i>Sesamum indicum</i> ]                       |
| c50075.graph_c0 | 20.6042023    | 21.2753393    | 23.136862     | 9.02946205     | 7.87681815     | 7.93473401     | 4.468E-60 | -2.48028 | down      | PREDICTED: uncharacterized protein LOC104218703 [ <i>Nicotiana sylvestris</i> ]                  |
| c50080.graph_c0 | 0             | 0             | 0             | 2.2467483      | 3.003893       | 5.18267799     | 4.768E-07 | Inf      | up        | carbonyl reductase (NADPH) [ <i>Galdieria sulphuraria</i> ]                                      |
| c50085.graph_c0 | 5.84936635    | 5.74262315    | 6.33134672    | 69.7701396     | 69.8018723     | 67.0053484     | 4.14E-160 | 2.43489  | up        | PREDICTED: subtilisin-like protease [ <i>Sesamum indicum</i> ]                                   |
| c50092.graph_c0 | 28.3427544    | 28.0747716    | 27.4807925    | 25.1760644     | 24.5026301     | 24.6494543     | 2.511E-55 | -1.26491 | down      | PREDICTED: RNA polymerase II C-terminal domain phosphatase-like 2 [ <i>Sesamum indicum</i> ]     |
| c50101.graph_c0 | 0             | 0             | 0             | 0.4120535      | 0.43405329     | 0.51835812     | 8.087E-10 | Inf      | up        | predicted protein [ <i>Micromonas</i> sp. RCC299]                                                |
| c50102.graph_c0 | 0             | 0             | 0             | 0.91318707     | 1.0027974      | 1.59100276     | 2.301E-08 | Inf      | up        | protein disulfide isomerase [ <i>Rhizoctonia solani</i> 123E]                                    |
| c50103.graph_c0 | 0             | 0.08453615    | 0             | 4.97169309     | 4.59981155     | 4.30728448     | 1.157E-15 | 6.27701  | up        | hypothetical protein MIMGU_mgv1a018847mg, partial [ <i>Erythranthe guttata</i> ]                 |
| c50108.graph_c1 | 0.46589557    | 0.34977157    | 0.07483678    | 24.1259777     | 21.3440043     | 24.1765273     | 1.12E-123 | 5.21572  | up        | PREDICTED: cationic amino acid transporter 7, chloroplastic [ <i>Sesamum indicum</i> ]           |
| c50109.graph_c0 | 7.02373725    | 5.91373217    | 6.41083471    | 89.2626429     | 91.0633435     | 85.7622692     | 2.63E-116 | 2.69158  | up        | PREDICTED: pentatricopeptide repeat-containing protein At5g66520-like [ <i>Sesamum indicum</i> ] |
| c50109.graph_c2 | 4.84451144    | 4.79297455    | 6.44255374    | 3.68472872     | 3.73359355     | 3.37419514     | 1.461E-07 | -1.67026 | down      | ribosomal protein S12 (chloroplast) [ <i>Andrographis paniculata</i> ]                           |
| c50110.graph_c0 | 2.26471942    | 2.15903542    | 1.94016941    | 9.43175544     | 9.55395096     | 8.78351522     | 2.946E-07 | 1.03647  | up        | PREDICTED: rRNA methyltransferase 1, mitochondrial [ <i>Sesamum indicum</i> ]                    |
| c50110.graph_c3 | 0.24452432    | 0.12238459    | 0             | 3.28779908     | 4.0115869      | 3.33539436     | 6.066E-10 | 3.79009  | up        | PREDICTED: uncharacterized protein LOC101248594 [ <i>Solanum lycopersicum</i> ]                  |
| c50110.graph_c4 | 0             | 0.1035005     | 0.06643459    | 1.01450225     | 1.45881548     | 1.19574802     | 1.375E-08 | 3.33104  | up        | PREDICTED: uncharacterized protein LOC105159914 [ <i>Sesamum indicum</i> ]                       |
| c50121.graph_c0 | 0.41516015    | 0.3324607     | 0.4054579     | 2.3052631      | 2.24490003     | 2.45229262     | 9.911E-08 | 1.51191  | up        | PREDICTED: uncharacterized protein LOC104898733 [ <i>Beta vulgaris</i> subsp. <i>vulgaris</i> ]  |
| c50123.graph_c0 | 1.52340525    | 1.9177159     | 1.750008      | 2.02987062     | 1.87822375     | 1.57422441     | 3.058E-05 | -1.01382 | down      | unnamed protein product [ <i>Coffea canephora</i> ]                                              |
| c50126.graph_c0 | 8.12288733    | 3.70678907    | 3.12123599    | 0              | 0              | 0              | 2.64E-11  | #NAME?   | down      | -                                                                                                |
| c50128.graph_c0 | 90.1259294    | 87.5077218    | 88.6948628    | 69.8055143     | 69.1401463     | 68.7477203     | 4.616E-68 | -1.44921 | down      | PREDICTED: uncharacterized protein LOC105173692 [ <i>Sesamum indicum</i> ]                       |
| c50129.graph_c0 | 2.8710987     | 3.75719485    | 3.02357017    | 24.0937275     | 26.6254457     | 24.0209311     | 5.036E-67 | 1.86228  | up        | PREDICTED: geranylgeranyl diphosphate reductase, chloroplastic [ <i>Sesamum indicum</i> ]        |

| #ID             | 0 h-1<br>FPKM | 0 h-2<br>FPKM | 0 h-3<br>FPKM | 28 h-1<br>FPKM | 28 h-2<br>FPKM | 28 h-3<br>FPKM | FDR       | log2FC   | regulated | nr_annotation                                                                       |
|-----------------|---------------|---------------|---------------|----------------|----------------|----------------|-----------|----------|-----------|-------------------------------------------------------------------------------------|
| c50133.graph_c0 | 1.68122665    | 1.87387867    | 1.99189762    | 18.3112556     | 17.9339476     | 16.5753248     | 1.259E-91 | 2.15842  | up        | PREDICTED: purple acid phosphatase 2-like [Sesamum indicum]                         |
| c50140.graph_c0 | 34.3826433    | 38.7797997    | 32.4725675    | 30.5244661     | 33.9164551     | 33.3669391     | 4.228E-24 | -1.20045 | down      | PREDICTED: uncharacterized protein LOC105161920 [Sesamum indicum]                   |
| c50140.graph_c1 | 3.71336722    | 5.03605145    | 4.00217488    | 28.3379659     | 25.3507057     | 24.7929908     | 3.705E-20 | 1.53086  | up        | PREDICTED: uncharacterized protein LOC105179028 [Sesamum indicum]                   |
| c50141.graph_c0 | 4.06501043    | 3.69231417    | 3.43409864    | 2.29788701     | 2.32177373     | 2.27685497     | 3.801E-15 | -1.78711 | down      | hypothetical protein VITISV_003658 [Vitis vinifera]                                 |
| c50144.graph_c0 | 0             | 0             | 0             | 3.24308376     | 4.04780667     | 5.02024342     | 3.649E-16 | Inf      | up        | molecular chaperone DnaK [Galdieria sulphuraria]                                    |
| c50145.graph_c0 | 3.33884596    | 3.8085413     | 2.39472516    | 18.2845557     | 14.3691529     | 15.9331378     | 9.471E-08 | 1.26216  | up        | PREDICTED: E3 ubiquitin-protein ligase MARCH11 isoform X1 [Sesamum indicum]         |
| c50150.graph_c0 | 0             | 0             | 0             | 0.36988159     | 0.2652102      | 0.53262416     | 8.647E-07 | Inf      | up        | Eukaryotic translation initiation factor 3 subunit, putative [Ricinus communis]     |
| c50151.graph_c0 | 100.433113    | 107.00824     | 95.6950621    | 74.3154562     | 70.6614911     | 72.5549033     | 1.574E-76 | -1.56842 | down      | PREDICTED: ethylene-insensitive protein 2-like [Sesamum indicum]                    |
| c50153.graph_c1 | 0             | 0             | 0             | 0.54552606     | 0.95775339     | 0.95211529     | 5.763E-10 | Inf      | up        | hypothetical protein EMIHUDRAFT_422478 [Emiliania huxleyi CCMP1516]                 |
| c50154.graph_c0 | 54.7983168    | 55.7814292    | 51.5380863    | 52.1480178     | 52.0480685     | 50.3719538     | 1.592E-46 | -1.15865 | down      | PREDICTED: splicing factor U2AF-associated protein 2 isoform X3 [Sesamum indicum]   |
| c50157.graph_c0 | 12.3520956    | 12.2686158    | 11.5663224    | 94.0890534     | 97.6463641     | 108.633354     | 9.842E-46 | 1.96407  | up        | ATP-binding cassette superfamily [Micromonas sp. RCC299]                            |
| c50163.graph_c0 | 0             | 0             | 0             | 0.56193374     | 0.97415709     | 1.17384537     | 3.415E-07 | Inf      | up        | -                                                                                   |
| c50166.graph_c1 | 2.60198304    | 2.4214534     | 3.39589577    | 1.12284435     | 1.17390052     | 1.01267728     | 6.459E-11 | -2.44228 | down      | PREDICTED: putative late blight resistance protein homolog R1A-10 [Sesamum indicum] |
| c50173.graph_c0 | 9.96485562    | 8.69094441    | 8.68473791    | 52.130936      | 52.3136626     | 45.5810559     | 3.515E-34 | 1.36637  | up        | PREDICTED: uncharacterized protein LOC102612426 [Citrus sinensis]                   |
| c50178.graph_c0 | 39.384112     | 41.0047076    | 36.5367343    | 34.4982182     | 32.73805       | 32.162809      | 6.193E-58 | -1.3239  | down      | PREDICTED: DDB1- and CUL4-associated factor homolog 1 [Sesamum indicum]             |
| c50179.graph_c0 | 0             | 0             | 0             | 2.57702125     | 3.99060179     | 5.1214044      | 2.287E-15 | Inf      | up        | EF2, translation elongation factor 2 [Ectocarpus siliculosus]                       |
| c50180.graph_c0 | 0             | 0             | 0             | 1.99728118     | 2.53893773     | 4.34604036     | 1.079E-11 | Inf      | up        | Myosin tail domain-containing protein [Rozella allomyces CSF55]                     |
| c50181.graph_c0 | 0             | 0             | 0             | 1.26316787     | 1.33623306     | 2.4152126      | 1.916E-11 | Inf      | up        | --                                                                                  |
| c50182.graph_c0 | 1.29921872    | 1.3005197     | 1.14394921    | 9.18035106     | 8.95211597     | 9.58859712     | 1.593E-22 | 1.79987  | up        | PREDICTED: putative late blight resistance protein homolog R1A-10 [Sesamum indicum] |
| c50183.graph_c0 | 270.542582    | 300.15235     | 362.054404    | 301.671805     | 242.89737      | 277.977136     | 2.338E-06 | -1.2753  | down      | Cell wall-associated hydrolase, partial [Medicago truncatula]                       |
| c50185.graph_c0 | 44.9326937    | 51.1383794    | 67.076259     | 278.575142     | 215.269415     | 252.261241     | 4.064E-07 | 1.09788  | up        | BnaCnng12640D [Brassica napus]                                                      |
| c50188.graph_c0 | 16.4507368    | 15.6830569    | 13.5899024    | 7.5438564      | 7.19694568     | 6.15572521     | 2.453E-17 | -2.21865 | down      | PREDICTED: putative ribonuclease H protein At1g65750 [Malus domestica]              |
| c50188.graph_c1 | 7.27170714    | 7.16381479    | 6.41690396    | 3.01046288     | 2.20473442     | 2.01979968     | 5.888E-76 | -2.61697 | down      | PREDICTED: uncharacterized protein LOC105167219 [Sesamum indicum]                   |

| #ID             | 0 h-1<br>FPKM | 0 h-2<br>FPKM | 0 h-3<br>FPKM | 28 h-1<br>FPKM | 28 h-2<br>FPKM | 28 h-3<br>FPKM | FDR       | log2FC   | regulated | nr_annotation                                                                                     |
|-----------------|---------------|---------------|---------------|----------------|----------------|----------------|-----------|----------|-----------|---------------------------------------------------------------------------------------------------|
| c50189.graph_c0 | 13.9401126    | 11.8138765    | 13.4077226    | 59.5153423     | 57.609189      | 56.7045318     | 1.12E-27  | 1.05954  | up        | PREDICTED: probable LRR receptor-like serine/threonine-protein kinase At2g16250 [Sesamum indicum] |
| c50190.graph_c1 | 21.3741212    | 16.7208718    | 14.3103252    | 2.21922687     | 0.47147148     | 0.95869641     | 1.568E-33 | -4.93012 | down      | -                                                                                                 |
| c50191.graph_c0 | 8.19328842    | 8.51999734    | 8.89317379    | 0.54923234     | 0.31320335     | 0.37740556     | 1.1E-132  | -5.45992 | down      | PREDICTED: uncharacterized protein LOC105157045 [Sesamum indicum]                                 |
| c50194.graph_c0 | 7.04809722    | 6.26054694    | 5.90410594    | 40.4031928     | 34.5544637     | 38.6037367     | 5.176E-31 | 1.4751   | up        | hypothetical protein M569_07983, partial [Genlisea aurea]                                         |
| c50195.graph_c0 | 37.0903537    | 42.949412     | 34.4193271    | 27.3649337     | 24.473612      | 24.5685701     | 2.453E-25 | -1.67236 | down      | hypothetical protein VITISV_039063 [Vitis vinifera]                                               |
| c50196.graph_c1 | 4.8048227     | 4.55732533    | 4.73707099    | 1.96932525     | 1.51966896     | 1.5135258      | 1.702E-72 | -2.58582 | down      | hypothetical protein VITISV_021503 [Vitis vinifera]                                               |
| c50197.graph_c0 | 6.71677483    | 6.65212592    | 5.845842      | 4.16655779     | 3.21923332     | 3.61976968     | 3.137E-83 | -1.8926  | down      | PREDICTED: uncharacterized protein LOC105415559 [Matis domestical]                                |
| c50198.graph_c0 | 7.81267953    | 8.4845077     | 6.91406588    | 7.71379534     | 6.23933042     | 6.49109382     | 8.049E-18 | -1.27201 | down      | PREDICTED: uncharacterized protein LOC105162629 [Sesamum indicum]                                 |
| c50199.graph_c0 | 257.142571    | 245.816206    | 258.271166    | 40.9401081     | 79.2906531     | 69.8413939     | 8.44E-191 | -3.09234 | down      | defensin-like protein 4 [Arabidopsis thaliana]                                                    |
| c50201.graph_c0 | 2.22889401    | 3.68620803    | 2.11702999    | 2.11297477     | 2.48016354     | 2.41383822     | 0.0042774 | -1.28527 | down      | -                                                                                                 |
| c50202.graph_c0 | 44.0154056    | 40.8946444    | 41.9431692    | 19.960047      | 19.7306879     | 20.0741095     | 3.02E-138 | -2.17584 | down      | PREDICTED: squalene monooxygenase-like [Sesamum indicum]                                          |
| c50208.graph_c0 | 1.57431195    | 1.74177137    | 1.70362374    | 1.62596963     | 1.1418541      | 1.32677794     | 0.0004381 | -1.38505 | down      | hypothetical protein AALP_AA3G181900 [Arabis alpina]                                              |
| c50212.graph_c0 | 10560.0812    | 9984.95233    | 10690.9067    | 3900.98327     | 4367.39198     | 4538.99836     | 2.939E-38 | -2.37676 | down      | hypothetical protein MIMGU_mgv1a016955mg [Erythranthe outtata]                                    |
| c50213.graph_c0 | 0.60983977    | 0.61045044    | 0.65305688    | 3.54582427     | 4.93571808     | 4.34004547     | 0.0001557 | 1.68323  | up        | PREDICTED: LOW QUALITY PROTEIN: uncharacterized protein LOC105161466 [Sesamum indicum]            |
| c50216.graph_c0 | 239.587447    | 251.5836      | 226.064149    | 12.2197035     | 15.5763481     | 18.4760069     | 0         | -5.04265 | down      | -                                                                                                 |
| c50218.graph_c0 | 2.02802411    | 1.47640354    | 1.97431157    | 0.17866136     | 0.04032861     | 0.07289311     | 5.294E-26 | -5.32195 | down      | hypothetical protein VITISV_044399 [Vitis vinifera]                                               |
| c50219.graph_c0 | 40.1403106    | 34.9634463    | 33.7221001    | 282.035034     | 293.592904     | 300.633046     | 7.12E-109 | 1.92091  | up        | 60S ribosomal L34-1 -like protein [Gossypium arboreum]                                            |
| c50224.graph_c0 | 12.64576      | 6.25386368    | 7.83496719    | 0.01367688     | 0              | 0              | 1.194E-25 | -12.0227 | down      | predicted protein [Hordeum vulgare subsp. vulgare]                                                |
| c50229.graph_c0 | 0             | 0             | 0             | 6.7923066      | 6.24040929     | 4.57010414     | 3.044E-14 | Inf      | up        | PREDICTED: homeobox-leucine zipper protein ATHB-13 [Sesamum indicum]                              |
| c50230.graph_c0 | 1.34178033    | 0.61990335    | 0.99475433    | 28.2432405     | 26.2121813     | 21.1486869     | 4.226E-34 | 3.58745  | up        | PREDICTED: zinc finger protein CONSTANS-LIKE 4-like [Sesamum indicum]                             |
| c50231.graph_c0 | 29.052712     | 14.837655     | 21.6193672    | 0              | 0              | 0              | 1.148E-29 | -Inf     | down      | predicted protein [Physcomitrella patens]                                                         |
| c50236.graph_c0 | 14.0486943    | 16.3309493    | 8.73538468    | 12.9278232     | 11.3752208     | 10.2802339     | 0.0011674 | -1.26287 | down      | -                                                                                                 |
| c50238.graph_c0 | 30.0943133    | 26.2713211    | 20.2355498    | 4.06927879     | 3.67417721     | 5.18827853     | 4.245E-27 | -3.65071 | down      | -                                                                                                 |
| c50239.graph_c0 | 7223.6407     | 7097.40063    | 7562.77428    | 3283.07678     | 4019.61288     | 3655.18711     | 1.402E-49 | -2.0893  | down      | hypothetical protein MIMGU_mgv1a01595/mg [Erythranthe outtata]                                    |
| c50240.graph_c0 | 1.71133495    | 2.29799201    | 1.39457225    | 320.321011     | 343.097615     | 310.24407      | 0         | 6.40567  | up        | hypothetical protein MIMGU_mgv1a02/056mg [Erythranthe outtata]                                    |
| c50242.graph_c0 | 2.6309155     | 2.3679819     | 2.92626513    | 10.7497294     | 12.9413303     | 11.0400062     | 9.61E-12  | 1.03887  | up        | PREDICTED: pentatricopeptide repeat-containing protein At1g11290 [Sesamum indicum]                |

| #ID             | 0 h-1<br>FPKM | 0 h-2<br>FPKM | 0 h-3<br>FPKM | 28 h-1<br>FPKM | 28 h-2<br>FPKM | 28 h-3<br>FPKM | FDR       | log2FC   | regulated | nr_annotation                                                                                      |
|-----------------|---------------|---------------|---------------|----------------|----------------|----------------|-----------|----------|-----------|----------------------------------------------------------------------------------------------------|
| c50244.graph_c0 | 1.63257204    | 1.9677184     | 2.0979197     | 9.49235157     | 11.1506601     | 9.26715449     | 8.38E-12  | 1.29809  | up        | PREDICTED: U-box domain-containing protein 28 [Sesamum indicum]                                    |
| c50245.graph_c0 | 0.20082858    | 0.10051484    | 0             | 7.29805255     | 5.66693319     | 6.07425431     | 5.225E-15 | 4.91482  | up        | PREDICTED: protein RALF-like 24 [Sesamum indicum]                                                  |
| c50247.graph_c0 | 9.55358467    | 4.91080734    | 6.4701709     | 0              | 0              | 0              | 2.05E-19  | -Inf     | down      | 40S ribosomal protein S11 [Lachanea thermotolerans]                                                |
| c50248.graph_c0 | 40.850923     | 46.8697947    | 42.7797947    | 26.7812207     | 28.8920438     | 29.0874392     | 8.422E-47 | -1.71318 | down      | PREDICTED: uncharacterized protein LOC105176358 [Sesamum indicum]                                  |
| c50251.graph_c0 | 25.3623616    | 20.8886618    | 18.5648575    | 7.93328379     | 7.79504187     | 8.56786075     | 2.465E-18 | -2.50213 | down      | PREDICTED: trineix transcription factor ASIL2 [Sesamum indicum]                                    |
| c50253.graph_c0 | 24.9242288    | 19.3233897    | 35.7966938    | 11.721332      | 7.05550922     | 6.66617448     | 1.825E-05 | -2.75119 | down      | conserved hypothetical protein [Ricinus communis]                                                  |
| c50254.graph_c0 | 2.0113616     | 3.09750104    | 1.39175039    | 9.67067368     | 10.9654053     | 9.95574647     | 8.746E-05 | 1.14898  | up        | PREDICTED: uncharacterized protein LOC105175348 [Sesamum indicum]                                  |
| c50255.graph_c0 | 3759.77414    | 3929.75954    | 3850.37212    | 1042.18329     | 1311.23894     | 1255.42556     | 7.77E-119 | -2.76764 | down      | oleosin, partial [Genlisea aurea]                                                                  |
| c50256.graph_c0 | 0.03788731    | 0.22755147    | 0.09737338    | 3.80000617     | 5.19629928     | 4.22424285     | 2.407E-20 | 4.09432  | up        | PREDICTED: probable indole-3-pyruvate monooxygenase YUCCA5 [Sesamum indicum]                       |
| c50257.graph_c0 | 1.14820929    | 0.61059699    | 0.5533104     | 44.3595228     | 44.4085809     | 43.4534339     | 2.78E-196 | 4.75525  | up        | PREDICTED: 5-methyltetrahydropteroyltriglutamate--homocysteine methyltransferase [Sesamum indicum] |
| c50258.graph_c0 | 6.10865909    | 4.4162271     | 5.88740159    | 0              | 0              | 0              | 3.123E-35 | -Inf     | down      | RecName: Full=60S ribosomal protein L31 [Cyanophora paradoxa]                                      |
| c50260.graph_c0 | 65.5419441    | 65.7201088    | 56.1974842    | 21.0805504     | 21.4683112     | 26.5357351     | 1.41E-100 | -2.5276  | down      | hypothetical protein POPTR_0001s05450g [Populus trichocarpa]                                       |
| c50261.graph_c0 | 2.09356461    | 2.10918139    | 2.11753701    | 13.5077987     | 13.4814937     | 12.1036518     | 3.473E-40 | 1.53766  | up        | PREDICTED: U-box domain-containing protein 30-like [Sesamum indicum]                               |
| c50267.graph_c0 | 8.13674358    | 9.44533612    | 7.7321959     | 0.84481976     | 1.30123518     | 0.93267168     | 3.235E-59 | -4.13006 | down      | hypothetical protein MIMGU_mgv1a021404mg, partial [Erythranthe guttata]                            |
| c50270.graph_c0 | 0             | 0             | 0             | 6.69013381     | 5.32222628     | 5.57712904     | 2.084E-29 | Inf      | up        | hypothetical protein MIMGU_mgv1a025449mg [Erythranthe guttata]                                     |
| c50271.graph_c0 | 0.06204401    | 0.12421227    | 0             | 13.3926889     | 9.69015989     | 12.400153      | 4.964E-32 | 6.50021  | up        | PREDICTED: uncharacterized protein LOC105180227 [Sesamum indicum]                                  |
| c50272.graph_c0 | 77.9722749    | 90.1034846    | 87.7539312    | 6.21164655     | 6.24398415     | 8.51433805     | 1.45E-127 | -4.69889 | down      | hypothetical protein MIMGU_mgv1a027115mg, partial [Erythranthe guttata]                            |
| c50273.graph_c0 | 0.28382527    | 0.21308211    | 0.18236335    | 6.13690642     | 6.19293948     | 6.77507689     | 1.791E-15 | 3.7288   | up        | -                                                                                                  |
| c50276.graph_c0 | 0.73507531    | 0.55185853    | 0.59037555    | 12.2376296     | 12.7528235     | 13.0237795     | 3.61E-67  | 3.25165  | up        | PREDICTED: glycerophosphodiester phosphodiesterase GDPDL3-like [Sesamum indicum]                   |
| c50277.graph_c0 | 55.1234473    | 62.7352794    | 61.1349519    | 34.3190187     | 38.8998087     | 49.3075408     | 7.628E-24 | -1.63695 | down      | PREDICTED: serine carboxypeptidase-like 50 [Sesamum indicum]                                       |
| c50278.graph_c0 | 4.27734925    | 3.05830883    | 2.9165437     | 1.07854688     | 1.20296241     | 1.06127951     | 9.852E-15 | -2.70352 | down      | PREDICTED: probable carboxylesterase 6 [Sesamum indicum]                                           |
| c50282.graph_c0 | 32.6504941    | 27.5795075    | 33.8933357    | 0.57009468     | 0.51474204     | 0.6977889      | 1.17E-105 | -6.81269 | down      | hypothetical protein MIMGU_mgv1a026849mg [Erythranthe guttata]                                     |
| c50283.graph_c0 | 42.5126105    | 44.5375646    | 34.2712369    | 45.6751865     | 37.081714      | 38.2884731     | 4.879E-11 | -1.09113 | down      | hypothetical protein PHAVU_005G057600g [Phaseolus vulgaris]                                        |
| c50286.graph_c0 | 13.480203     | 7.25231509    | 8.46380843    | 0              | 0              | 0              | 3.512E-27 | -Inf     | down      | predicted protein [Physcomitrella patens]                                                          |



| #ID             | 0 h-1<br>FPKM | 0 h-2<br>FPKM | 0 h-3<br>FPKM | 28 h-1<br>FPKM | 28 h-2<br>FPKM | 28 h-3<br>FPKM | FDR       | log2FC   | regulated | nr_annotation                                                                                                       |
|-----------------|---------------|---------------|---------------|----------------|----------------|----------------|-----------|----------|-----------|---------------------------------------------------------------------------------------------------------------------|
| c50287.graph_c0 | 2.41019564    | 2.72729723    | 1.88525024    | 1.25666604     | 1.06588485     | 1.46045981     | 8.213E-10 | -1.97837 | down      | PREDICTED: uncharacterized protein LOC105168059 [Sesamum indicum]                                                   |
| c50290.graph_c0 | 0.43567418    | 0.2907403     | 0.09330976    | 280.706222     | 232.270887     | 271.686706     | 6.72E-199 | 8.82791  | up        | PREDICTED: GDSL esterase/lipase Atg03810-like [Sesamum indicum]                                                     |
| c50294.graph_c0 | 7.15865176    | 7.06536465    | 7.99552371    | 5.61617869     | 5.99286148     | 5.47550062     | 3.531E-22 | -1.47157 | down      | PREDICTED: mitoferrin-like [Sesamum indicum]                                                                        |
| c50297.graph_c0 | 2217.19253    | 2063.96425    | 2415.48696    | 358.938876     | 423.163673     | 384.386757     | 9.818E-76 | -3.61344 | down      | PREDICTED: uncharacterized protein LOC100246645 [Vitis vinifera]                                                    |
| c50300.graph_c0 | 196.129956    | 231.129658    | 194.181325    | 167.977646     | 173.899063     | 164.957905     | 2.528E-23 | -1.38423 | down      | putative heat shock protein 90, partial [Liriodendron tulipifera]                                                   |
| c50301.graph_c0 | 121.356152    | 122.957718    | 118.531762    | 106.634703     | 106.282435     | 92.3417525     | 7.434E-54 | -1.34018 | down      | -                                                                                                                   |
| c50309.graph_c0 | 39.9011934    | 43.4474324    | 39.2387785    | 6.86258534     | 6.89585013     | 6.14173104     | 5.62E-200 | -3.71357 | down      | PREDICTED: uncharacterized protein LOC105167450 [Sesamum indicum]                                                   |
| c50310.graph_c0 | 18.7132801    | 16.7008359    | 14.4863288    | 202.208059     | 247.822519     | 234.129027     | 1.181E-45 | 2.68972  | up        | PREDICTED: 60S ribosomal protein L15 [Solanum lycopersicum]                                                         |
| c50311.graph_c0 | 174.21718     | 181.944648    | 187.984746    | 38.7899494     | 42.5158011     | 34.1825902     | 4.54E-166 | -3.32858 | down      | PREDICTED: vegetative incompatibility protein HET-E-1-like [Sesamum indicum]                                        |
| c50313.graph_c0 | 0.70889398    | 1.48371711    | 0.41407129    | 6.744699       | 6.76647869     | 6.26801088     | 2.385E-07 | 1.83998  | up        | unnamed protein product [Coffea canephora]                                                                          |
| c50316.graph_c0 | 13.0823184    | 12.2296055    | 11.2885776    | 2.7699373      | 2.71384421     | 2.96557128     | 1.51E-142 | -3.20334 | down      | PREDICTED: scarecrow-like protein 8 [Sesamum indicum]                                                               |
| c50321.graph_c0 | 5.17771059    | 6.27403113    | 7.28390065    | 3.8819659      | 4.25613365     | 3.81411217     | 1.735E-08 | -1.74344 | down      | hypothetical protein MIMGU_mgv1a011562mg [Erythranthe outafata]                                                     |
| c50322.graph_c0 | 4.884407      | 3.13653079    | 2.96068697    | 31.815669      | 27.8798884     | 27.3823671     | 5.849E-20 | 1.90202  | up        | PREDICTED: 40S ribosomal protein S17-like [Sesamum indicum]                                                         |
| c50323.graph_c0 | 16.9367803    | 13.488742     | 20.6523819    | 91.108672      | 92.8090742     | 98.0987983     | 7.891E-22 | 1.37124  | up        | hypothetical protein MIMGU_mgv1a011620mg [Erythranthe outafata]                                                     |
| c50330.graph_c0 | 0.2403748     | 0.7218465     | 0.51481856    | 15.5485688     | 13.7234189     | 11.7371303     | 9.969E-26 | 3.69915  | up        | hypothetical protein MIMGU_mgv1a02115/mg [Erythranthe outafata]                                                     |
| c50331.graph_c0 | 26.9534761    | 26.160114     | 26.5622853    | 5.01322485     | 4.10818417     | 4.15825468     | 0         | -3.67562 | down      | PREDICTED: UPF0392 protein RCOM_0530710-like [Sesamum indicum]                                                      |
| c50341.graph_c0 | 9.9267909     | 10.2727558    | 7.82634084    | 1.60327431     | 1.63642461     | 1.79174568     | 2.826E-51 | -3.56467 | down      | PREDICTED: U-box domain-containing protein 8 [Sesamum indicum]                                                      |
| c50344.graph_c0 | 4.62674263    | 5.47937397    | 5.86180736    | 1.84711134     | 2.39474431     | 1.89369643     | 2.98E-20  | -2.47387 | down      | -                                                                                                                   |
| c50349.graph_c0 | 0.8258109     | 0.68886485    | 1.0611997     | 6.30204329     | 8.30943156     | 8.40744181     | 1.576E-06 | 2.06545  | up        | PREDICTED: RNA-binding protein 38-like isoform X1 [Nelumbo nucifera]                                                |
| c50366.graph_c0 | 0.04692523    | 0.25051849    | 0.10050129    | 3.93344169     | 4.22898835     | 3.73841471     | 2.93E-37  | 3.81044  | up        | PREDICTED: BTB/POZ domain-containing protein At1g67900 [Sesamum indicum]                                            |
| c50372.graph_c0 | 0             | 0             | 0             | 1.70454592     | 1.34962421     | 1.09131805     | 1.805E-14 | Inf      | up        | PREDICTED: cytochrome P450 CYP82D4-like [Sesamum indicum]                                                           |
| c50373.graph_c0 | 0.3941234     | 0.07890361    | 0.20258567    | 6.8174294      | 7.50039862     | 6.9653953      | 4.082E-16 | 3.89388  | up        | PREDICTED: auxin-induced in root cultures protein 12-like [Sesamum indicum]                                         |
| c50374.graph_c0 | 1.17101687    | 0.67338544    | 0.92849549    | 40.381424      | 38.9621994     | 29.1682066     | 2.669E-37 | 4.20033  | up        | PREDICTED: succinate dehydrogenase [ubiquinone] flavoprotein subunit 1, mitochondrial isoform X1 [Nicotiana glauca] |
| c50376.graph_c0 | 5.09929737    | 4.92838963    | 6.02556231    | 0.63898964     | 0.46155819     | 1.11234204     | 8.836E-42 | -3.94795 | down      | -                                                                                                                   |
| c50380.graph_c0 | 13.7275447    | 11.8834122    | 6.07515101    | 461.517249     | 502.493298     | 381.599503     | 1.603E-63 | 4.32577  | up        | hypothetical protein MIMGU_mgv1a001548mg [Erythranthe outafata]                                                     |

| #ID             | 0 h-1<br>FPKM | 0 h-2<br>FPKM | 0 h-3<br>FPKM | 28 h-1<br>FPKM | 28 h-2<br>FPKM | 28 h-3<br>FPKM | FDR       | log2FC   | regulated | nr_annotation                                                                                    |
|-----------------|---------------|---------------|---------------|----------------|----------------|----------------|-----------|----------|-----------|--------------------------------------------------------------------------------------------------|
| c50385.graph_c0 | 0             | 0             | 0             | 3.01963986     | 3.05362588     | 2.56256153     | 3.146E-14 | Inf      | up        | PREDICTED: uncharacterized protein LOC105157280 [Sesamum indicum]                                |
| c50389.graph_c0 | 0.06993471    | 0.21001423    | 0.08986888    | 3.25300139     | 4.03858848     | 3.1521268      | 4.318E-11 | 3.72943  | up        | PREDICTED: uncharacterized protein At1g08160-like [Sesamum indicum]                              |
| c50390.graph_c0 | 2.72507421    | 1.70487685    | 2.40750692    | 0.12378551     | 0.50295021     | 0.20201594     | 4.28E-17  | -4.13764 | down      | -                                                                                                |
| c50393.graph_c0 | 73.6508277    | 72.5687614    | 72.1225064    | 3.80637325     | 3.54504378     | 4.5489002      | 0         | -5.28671 | down      | hypothetical protein MIMGU_mgv1a014429mg [Erythranthe outtata]                                   |
| c50401.graph_c0 | 2.54984714    | 2.04192034    | 2.44656871    | 0.46948093     | 0.60238032     | 0.22179046     | 1.316E-29 | -3.53817 | down      | PREDICTED: cytochrome P450 71A21-like [Sesamum indicum]                                          |
| c50411.graph_c0 | 0             | 0             | 0             | 2.119839       | 2.42066712     | 3.408667       | 1.441E-10 | Inf      | up        | hypothetical protein MIMGU_mgv1a015512mg [Erythranthe outtata]                                   |
| c50414.graph_c0 | 0             | 0             | 0             | 1.37982792     | 1.82984988     | 2.8851913      | 8.399E-07 | Inf      | up        | 60S ribosomal protein L13a [Rozella allomyces CSF55]                                             |
| c50416.graph_c0 | 2.3127972     | 1.37191889    | 2.20150813    | 1.68092768     | 1.01181339     | 1.11761895     | 4.885E-05 | -1.71901 | down      | PREDICTED: cysteine proteinase inhibitor 1-like [Sesamum indicum]                                |
| c50419.graph_c0 | 15.4534843    | 17.6788099    | 14.3779534    | 5.43342207     | 6.70029991     | 6.26361545     | 3.933E-48 | -2.458   | down      | PREDICTED: uncharacterized protein At5g05190 [Sesamum indicum]                                   |
| c50427.graph_c0 | 0             | 0.03751075    | 0.04815458    | 4.57553508     | 3.22141412     | 3.62248024     | 2.074E-22 | 5.9494   | up        | PREDICTED: geraniol 8-hydroxylase-like [Sesamum indicum]                                         |
| c50432.graph_c0 | 0.80679455    | 0.08076024    | 0.31102888    | 2.9905055      | 4.44729942     | 4.88045613     | 9.084E-05 | 2.28318  | up        | hypothetical protein M569_10692 [Genlisea aurea]                                                 |
| c50436.graph_c0 | 2.57430903    | 3.55855797    | 1.57528049    | 1.42551845     | 2.65466335     | 1.96291926     | 0.0099545 | -1.43603 | down      | -                                                                                                |
| c50437.graph_c0 | 0.21504522    | 0.4783568     | 0.27634163    | 6.49486858     | 6.836407       | 6.22084096     | 4.086E-34 | 3.24252  | up        | PREDICTED: probable leucine-rich repeat receptor-like protein kinase At1g68400 [Sesamum indicum] |
| c50454.graph_c0 | 87.9634008    | 84.0334318    | 84.5277496    | 21.4881921     | 23.0555967     | 23.2679972     | 0         | -3.00949 | down      | PREDICTED: LOW QUALITY PROTEIN: putative ETHYLENE INSENSITIVE 3-like 4 protein [Sesamum indicum] |
| c50458.graph_c0 | 0.05331743    | 0.10674165    | 0.13703003    | 1.8406632      | 2.36171315     | 2.24504413     | 2.238E-13 | 3.33961  | up        | PREDICTED: uncharacterized protein LOC105166786 isoform X1 [Sesamum indicum]                     |
| c50460.graph_c0 | 0.18373335    | 0.06130578    | 0             | 2.71523887     | 3.57693352     | 2.1429697      | 1.473E-10 | 4.03871  | up        | unnamed protein product [Coffea canephora]                                                       |
| c50465.graph_c0 | 0.06713446    | 0.03360084    | 0.04313522    | 1.56137398     | 1.47585748     | 2.11017581     | 3.679E-12 | 4.0768   | up        | PREDICTED: cannabidiolic acid synthase-like 1 [Sesamum indicum]                                  |
| c50466.graph_c0 | 0.36903826    | 0.22164468    | 0.18969151    | 3.64772235     | 2.78498821     | 3.21725892     | 4.254E-10 | 2.54556  | up        | PREDICTED: pentatricopeptide repeat-containing protein At1g09410-like [Sesamum indicum]          |
| c50469.graph_c0 | 0             | 0             | 0             | 1.45497138     | 1.30142515     | 1.43135117     | 8.712E-21 | Inf      | up        | PREDICTED: uncharacterized protein LOC105170283 [Sesamum indicum]                                |
| c50477.graph_c0 | 0             | 0             | 0             | 4.38682541     | 6.08803777     | 2.65156571     | 3.507E-07 | Inf      | up        | --                                                                                               |
| c50479.graph_c0 | 0.85391267    | 0.44773548    | 0.41802346    | 6.14708154     | 4.90982618     | 5.1365445      | 3.905E-11 | 2.15263  | up        | PREDICTED: putative receptor-like protein kinase At5g39000 [Sesamum indicum]                     |
| c50480.graph_c0 | 50.399795     | 48.3273557    | 55.547837     | 36.040932      | 38.2312427     | 35.9198014     | 3.446E-27 | -1.57771 | down      | PREDICTED: calyculin-binding protein-like [Sesamum indicum]                                      |
| c50481.graph_c0 | 0.75901224    | 0.81605171    | 0.43349368    | 9.13280141     | 9.29757483     | 8.95275272     | 5.87E-32  | 2.68513  | up        | hypothetical protein MIMGU_mgv1a005752mg [Erythranthe outtata]                                   |
| c50482.graph_c0 | 0.44260548    | 0.08860974    | 0             | 287.134344     | 236.658405     | 283.59505      | 1.86E-152 | 9.50759  | up        | PREDICTED: putative lipid-binding protein AIR1B [Beta vulgaris subsp. vulgaris]                  |
| c50489.graph_c0 | 36.6009765    | 38.3560896    | 32.826525     | 21.0615044     | 20.9692915     | 20.5933536     | 4.028E-86 | -1.87244 | down      | PREDICTED: transcription factor MYC4-like [Sesamum indicum]                                      |

| #ID             | 0 h-1<br>FPKM | 0 h-2<br>FPKM | 0 h-3<br>FPKM | 28 h-1<br>FPKM | 28 h-2<br>FPKM | 28 h-3<br>FPKM | FDR       | log2FC   | regulated | nr_annotation                                                                                              |
|-----------------|---------------|---------------|---------------|----------------|----------------|----------------|-----------|----------|-----------|------------------------------------------------------------------------------------------------------------|
| c50490.graph_c0 | 4.79986033    | 5.55691245    | 4.79734154    | 4.19326049     | 5.55191702     | 4.19801077     | 5.838E-16 | -1.21121 | down      | PREDICTED: tyrosine domain receptor-like kinase 4 [Sesamum indicum]                                        |
| c50491.graph_c0 | 0             | 0.05785681    | 0.07427391    | 16.6351396     | 19.0025395     | 16.1107194     | 2.147E-65 | 7.50367  | up        | PREDICTED: adenine phosphoribosyltransferase 1-like [Sesamum indicum]                                      |
| c50495.graph_c0 | 0.0576275     | 0.0576852     | 0.14810723    | 1.34026668     | 1.92865289     | 1.4695877      | 1.065E-08 | 3.06388  | up        | PREDICTED: glycerophosphodiester phosphodiesterase GDPDL3-like [Sesamum indicum]                           |
| c50496.graph_c0 | 0.09932885    | 0.23199939    | 0.29783017    | 1.25132166     | 1.36882782     | 1.17815568     | 0.0005543 | 1.49196  | up        | PREDICTED: putative pentatricopeptide repeat-containing protein At1g69350, mitochondrial [Sesamum indicum] |
| c50497.graph_c0 | 0             | 0             | 0             | 1.51983368     | 2.00939143     | 3.18901339     | 2.04E-06  | Inf      | up        | 60S ribosomal protein L7a [Zea mays]                                                                       |
| c50502.graph_c0 | 41.2494328    | 42.6694525    | 35.4893789    | 19.8667842     | 21.020186      | 20.0230539     | 1.584E-63 | -2.05981 | down      | PREDICTED: myb-like protein X [Sesamum indicum]                                                            |
| c50505.graph_c0 | 0.91038616    | 1.06318074    | 0.90990843    | 0.18379539     | 0.16595001     | 0.17997065     | 8.593E-15 | -3.53436 | down      | hypothetical protein MIMGU_mgv1a0025911mg [Erythranthe guttata]                                            |
| c50507.graph_c0 | 2.55333697    | 2.2757958     | 1.57314888    | 13.7274701     | 17.1229359     | 13.3173431     | 1.218E-12 | 1.70067  | up        | hypothetical protein MIMGU_mgv1a0050953mg [Erythranthe guttata]                                            |
| c50509.graph_c0 | 19.5535103    | 18.8324868    | 18.7434098    | 87.9569107     | 94.0517379     | 91.0158249     | 6.495E-24 | 1.16657  | up        | PREDICTED: serine/threonine-protein phosphatase PP2A-2 catalytic subunit [Sesamum indicum]                 |
| c50510.graph_c0 | 0.08613714    | 0.03448936    | 0.04427585    | 1.17695476     | 1.11920532     | 1.55296375     | 7.268E-13 | 3.4633   | up        | PREDICTED: probable RNA-dependent RNA polymerase 5 [Sesamum indicum]                                       |
| c50512.graph_c0 | 3.64857777    | 3.68734888    | 3.47134279    | 2.62626755     | 2.18709679     | 2.76719138     | 4.173E-13 | -1.60064 | down      | -                                                                                                          |
| c50516.graph_c0 | 25.3328646    | 24.7730417    | 29.8617906    | 22.3065796     | 25.1919222     | 26.8695996     | 1.248E-09 | -1.19712 | down      | ferritin [Avicennia marina]                                                                                |
| c50519.graph_c0 | 4.96080443    | 4.28862121    | 3.76694506    | 3.58207184     | 2.79035492     | 2.90383717     | 7.116E-17 | -1.57624 | down      | PREDICTED: vinorine synthase-like isoform X1 [Sesamum indicum]                                             |
| c50520.graph_c0 | 31.6957508    | 41.3448845    | 14.5101675    | 987.896856     | 1177.32287     | 941.927153     | 1.449E-71 | 4.06685  | up        | PREDICTED: dirigent protein 22-like [Sesamum indicum]                                                      |
| c50525.graph_c0 | 2.29575436    | 2.01079656    | 2.67356006    | 0.88641242     | 0.75326806     | 0.68075793     | 3.858E-12 | -2.68264 | down      | PREDICTED: uncharacterized protein LOC105162053 [Sesamum indicum]                                          |
| c50526.graph_c0 | 19.7784066    | 26.8037327    | 19.1597806    | 13.9325294     | 13.3784832     | 16.0607284     | 3.637E-09 | -1.68845 | down      | hypothetical protein M569_14808, partial [Genlisea aurea]                                                  |
| c50528.graph_c0 | 0.44034514    | 0.22039304    | 0.14146523    | 4.56057438     | 4.55122065     | 4.76599256     | 1.603E-08 | 3.03493  | up        | hypothetical protein CICLE_v10032302mg [Citrus clementina]                                                 |
| c50530.graph_c0 | 0.06171555    | 0.06177735    | 0.39653463    | 2.42214333     | 2.9969566      | 2.78166922     | 6.155E-09 | 2.86285  | up        | -                                                                                                          |
| c50532.graph_c0 | 0             | 0             | 0.14587044    | 2.64005051     | 3.35210355     | 3.56799255     | 1.041E-12 | 4.90476  | up        | PREDICTED: chromosome-associated kinesin KIF4A [Sesamum indicum]                                           |
| c50533.graph_c0 | 0             | 0             | 0             | 0.8741685      | 0.74982759     | 0.98080724     | 1.638E-14 | Inf      | up        | hypothetical protein MIMGU_mgv1a002450mg [Erythranthe guttata]                                             |
| c50535.graph_c0 | 9.42879944    | 3.88114582    | 7.24718091    | 0              | 0              | 0.15678018     | 4.132E-13 | -8.10908 | down      | 60S ribosomal protein L10 [Lichtheimia corymbifera IMRC-FSI1-96821]                                        |
| c50536.graph_c0 | 0.04182974    | 0.04187162    | 0.16125861    | 1.4288758      | 1.31759069     | 2.45593931     | 5.446E-05 | 3.30161  | up        | PREDICTED: mitogen-activated protein kinase kinase kinase 2-like [Sesamum indicum]                         |
| c50538.graph_c0 | 0             | 0             | 0             | 1.54328705     | 2.10158693     | 2.43604158     | 2.118E-15 | Inf      | up        | PREDICTED: beta-glucosidase 12-like [Sesamum indicum]                                                      |
| c50540.graph_c0 | 0.14491152    | 0.07252831    | 0             | 3.63356961     | 3.99398413     | 3.17981553     | 1.131E-12 | 4.56779  | up        | -                                                                                                          |
| c50544.graph_c0 | 0             | 0             | 0             | 6.24224579     | 6.38212539     | 5.76777739     | 4.6E-16   | Inf      | up        | PREDICTED: glutaredoxin-C5-like [Sesamum indicum]                                                          |

| #ID             | 0 h-1<br>FPKM | 0 h-2<br>FPKM | 0 h-3<br>FPKM | 28 h-1<br>FPKM | 28 h-2<br>FPKM | 28 h-3<br>FPKM | FDR       | log2FC   | regulated | nr_annotation                                                                                         |
|-----------------|---------------|---------------|---------------|----------------|----------------|----------------|-----------|----------|-----------|-------------------------------------------------------------------------------------------------------|
| c50545.graph_c0 | 1.11761958    | 0.88727553    | 1.18856723    | 6.89037067     | 7.38470217     | 6.33101088     | 5.739E-10 | 1.59717  | up        | PREDICTED: uncharacterized protein LOC105163839 [Sesamum indicum]                                     |
| c50549.graph_c0 | 1.53756357    | 2.19871886    | 1.62300326    | 0.03991044     | 0.32431847     | 0              | 3E-25     | -4.97858 | down      | PREDICTED: probable N-acetyltransferase HLS1 [Sesamum indicum]                                        |
| c50558.graph_c0 | 16.2148041    | 16.6269198    | 13.5523026    | 16.4476571     | 16.2348345     | 15.7665983     | 2.478E-19 | -1.02579 | down      | PREDICTED: general transcriptional corepressor ssn6 isoform X1 [Sesamum indicum]                      |
| c50559.graph_c0 | 713.74997     | 751.060965    | 713.806162    | 97.3414861     | 110.529223     | 107.488933     | 0         | -3.87869 | down      | PREDICTED: nematode resistance protein-like HSPRO2 [Sesamum indicum]                                  |
| c50561.graph_c0 | 0.31962102    | 0.55989687    | 0.10268142    | 3.1941073      | 2.41205551     | 2.93808471     | 4.102E-05 | 2.04187  | up        | -                                                                                                     |
| c50562.graph_c0 | 1.31345813    | 1.23509013    | 1.32981782    | 22.5346712     | 24.2645442     | 24.242088      | 4.332E-69 | 3.10434  | up        | PREDICTED: coatamer subunit gamma-2 isoform X1 [Sesamum indicum]                                      |
| c50563.graph_c0 | 0             | 0             | 0             | 0.81147457     | 0.62118984     | 0.86368255     | 3.032E-14 | Inf      | up        | PREDICTED: putative transcription factor bHLH086 [Sesamum indicum]                                    |
| c50566.graph_c0 | 0.07078398    | 0.07085486    | 0.09096022    | 3.39539575     | 2.22961747     | 2.01499288     | 1.812E-07 | 3.94254  | up        | PREDICTED: glycine-rich RNA-binding protein 3, mitochondrial [Sesamum indicum]                        |
| c50570.graph_c0 | 0.42947954    | 0.19107093    | 0.49057619    | 8.01167682     | 9.45716661     | 9.22602984     | 9.764E-27 | 3.49193  | up        | PREDICTED: uncharacterized protein LOC105162704 [Sesamum indicum]                                     |
| c50575.graph_c0 | 0.61530483    | 0.57192661    | 0.5930183     | 3.7852286      | 3.98011393     | 3.93583173     | 4.898E-10 | 1.62626  | up        | PREDICTED: probable beta-D-xylosidase 7 [Sesamum indicum]                                             |
| c50578.graph_c0 | 48.7998054    | 50.9257011    | 53.0316523    | 8.82496368     | 8.42199474     | 7.79359373     | 1.2E-171  | -3.70087 | down      | PREDICTED: stachyose synthase [Sesamum indicum]                                                       |
| c50580.graph_c0 | 0.61297274    | 0.68176282    | 0.35008633    | 7.21058178     | 8.68560509     | 7.2705697      | 4.401E-34 | 2.73172  | up        | PREDICTED: centrosome-associated protein CEP250 [Sesamum indicum]                                     |
| c50581.graph_c0 | 0.26525512    | 0             | 0             | 7.61504267     | 5.57016267     | 7.94424146     | 2.858E-14 | 5.25803  | up        | -                                                                                                     |
| c50582.graph_c0 | 0.05957105    | 0             | 0.07655116    | 1.55865226     | 1.13367191     | 1.5544803      | 1.685E-09 | 3.86497  | up        | PREDICTED: metalloendoproteinase 1-like [Sesamum indicum]                                             |
| c50588.graph_c0 | 20.8989179    | 22.2468501    | 26.0542672    | 12.4120808     | 8.64828195     | 10.5443822     | 7.619E-19 | -2.22367 | down      | PREDICTED: 1,2-dihydroxy-3-keto-5-methylthiopentene dioxygenase 2 [Sesamum indicum]                   |
| c50589.graph_c0 | 286.708522    | 275.459707    | 283.258028    | 289.221216     | 310.818846     | 286.525491     | 2.005E-35 | -1.02224 | down      | PREDICTED: coiled-coil domain-containing protein 9-like [Sesamum indicum]                             |
| c50590.graph_c0 | 208.681287    | 224.602756    | 197.887598    | 114.474056     | 120.879864     | 103.229092     | 3.02E-107 | -1.98883 | down      | PREDICTED: uncharacterized protein AT1G01500 [Sesamum indicum]                                        |
| c50592.graph_c0 | 0.44148119    | 0.41430306    | 0.31911796    | 14.2785363     | 16.0065825     | 15.1039734     | 5.751E-85 | 4.18505  | up        | PREDICTED: dihydrolipoyl dehydrogenase 2, chloroplastic-like isoform X1 [Sesamum indicum]             |
| c50596.graph_c0 | 0.36980387    | 0             | 0.23760631    | 2.08297773     | 2.79076598     | 1.86417922     | 1.461E-06 | 2.38285  | up        | -                                                                                                     |
| c50601.graph_c0 | 0.08169489    | 0.16355339    | 0.27994977    | 1.76146942     | 2.3588574      | 2.14794203     | 1.069E-09 | 2.47281  | up        | PREDICTED: protein CYPRO4 [Sesamum indicum]                                                           |
| c50602.graph_c0 | 0.17728643    | 0.4056319     | 0.45564016    | 4.16003868     | 3.37386439     | 3.80010208     | 1.93E-14  | 2.34889  | up        | PREDICTED: putative 1-phosphatidylinositol-3-phosphate 5-kinase FAB1C isoform X2 [Populus euphratica] |
| c50608.graph_c0 | 0.54939381    | 0.43995516    | 0.84719136    | 10.0622656     | 14.7816103     | 12.7070768     | 3.747E-15 | 3.25598  | up        | PREDICTED: palmitoyl-monogalactosyldiacylglycerol delta-7 desaturase, chloroplastic [Sesamum indicum] |
| c50612.graph_c0 | 2.89303925    | 3.20901037    | 2.11002891    | 1.19339268     | 2.46290675     | 2.0403401      | 2.266E-06 | -1.61408 | down      | PREDICTED: uncharacterized protein LOC105161205 [Sesamum indicum]                                     |

| #ID             | 0 h-1<br>FPKM | 0 h-2<br>FPKM | 0 h-3<br>FPKM | 28 h-1<br>FPKM | 28 h-2<br>FPKM | 28 h-3<br>FPKM | FDR       | log2FC   | regulated | nr_annotation                                                                                               |
|-----------------|---------------|---------------|---------------|----------------|----------------|----------------|-----------|----------|-----------|-------------------------------------------------------------------------------------------------------------|
| c50618.graph_c0 | 14.5959802    | 8.74138216    | 10.3400735    | 0              | 0              | 0              | 2.821E-37 | -Inf     | down      | NADH dehydrogenase subunit 2 [Amorphytotheca resinae]                                                       |
| c50623.graph_c0 | 10.376967     | 9.93907495    | 10.1778662    | 44.2099714     | 43.5028093     | 42.2746507     | 6.616E-35 | 1.0012   | up        | PREDICTED: probable phosphoribosylformylglycinamide synthase, chloroplastic/mitochondrial [Sesamum indicum] |
| c50625.graph_c0 | 2.81922329    | 3.03108678    | 1.94558505    | 0.53122099     | 0.51390294     | 0.83598169     | 2.522E-16 | -3.13451 | down      | PREDICTED: salicylate carboxymethyltransferase [Sesamum indicum]                                            |
| c50630.graph_c0 | 565.932905    | 652.502523    | 574.70912     | 211.580395     | 212.362054     | 202.327983     | 3.063E-76 | -2.60818 | down      | hypothetical protein AM1K_S00053P001/5450 [Amborella trichopoda]                                            |
| c50631.graph_c0 | 1.58383495    | 1.05694728    | 1.91193967    | 21.2434353     | 21.8894533     | 19.896214      | 2.663E-44 | 2.69634  | up        | PREDICTED: uncharacterized protein LOC105167007 [Sesamum indicum]                                           |
| c50633.graph_c0 | 4.53091983    | 4.751431      | 4.34370372    | 1.56811734     | 2.17098984     | 2.21792297     | 6.209E-15 | -2.28299 | down      | PREDICTED: uncharacterized protein LOC105158623 isoform X2 [Sesamum indicum]                                |
| c50636.graph_c0 | 0             | 0.04654826    | 0             | 1.68985837     | 1.31217396     | 1.26859778     | 1.975E-12 | 5.43737  | up        | -                                                                                                           |
| c50640.graph_c0 | 303.97244     | 300.207546    | 317.481325    | 96.7382652     | 104.384426     | 107.71293      | 4.95E-168 | -2.66831 | down      | PREDICTED: uncharacterized protein LOC105162278 [Sesamum indicum]                                           |
| c50641.graph_c0 | 0             | 0.16129723    | 0             | 1.63957675     | 2.06196354     | 1.5767886      | 1.305E-08 | 3.94966  | up        | PREDICTED: KH domain-containing protein At4g18375-like [Glycine max]                                        |
| c50642.graph_c0 | 49.6168481    | 42.571313     | 48.8371513    | 201.789488     | 234.847068     | 239.072444     | 2.368E-17 | 1.16999  | up        | PREDICTED: 60S ribosomal protein L6-like [Sesamum indicum]                                                  |
| c50643.graph_c0 | 0.54553226    | 1.25598062    | 1.12164889    | 5.51120689     | 5.76368776     | 6.60006017     | 1.328E-06 | 1.51677  | up        | PREDICTED: nucleolin [Sesamum indicum]                                                                      |
| c50648.graph_c0 | 4.53925679    | 2.54896219    | 3.84132601    | 0              | 0.07265325     | 0              | 1.361E-20 | -8.33255 | down      | 60S ribosomal protein L30 [Nectria haematococca mpVI 77-13-4]                                               |
| c50650.graph_c0 | 0             | 0             | 0             | 0.78602488     | 0.75145422     | 1.05640686     | 9.128E-14 | Inf      | up        | PREDICTED: asparagine--tRNA ligase, cytoplasmic 2 [Sesamum indicum]                                         |
| c50651.graph_c0 | 0.07805779    | 0             | 0             | 1.4750308      | 1.66476814     | 1.2499059      | 9.51E-12  | 4.75338  | up        | PREDICTED: scarecrow-like protein 32 [Sesamum indicum]                                                      |
| c50652.graph_c0 | 4.50628147    | 5.2537481     | 5.99512951    | 0.65502788     | 1.39159708     | 1.00611275     | 7.163E-25 | -3.46231 | down      | PREDICTED: uncharacterized protein LOC105162763 [Sesamum indicum]                                           |
| c50658.graph_c0 | 0.20065574    | 0.26780889    | 0.08595019    | 6.56259457     | 8.07611109     | 4.83935464     | 7.547E-12 | 4.05156  | up        | hypothetical protein MIMGU_mgv1a000415mg [Erythranthe guttata]                                              |
| c50662.graph_c0 | 9.02014408    | 10.3940519    | 9.70429585    | 4.26888568     | 5.29980485     | 4.04320412     | 1.265E-35 | -2.18913 | down      | hypothetical protein MIMGU_mgv1a00519/mg [Erythranthe guttata]                                              |
| c50663.graph_c0 | 1.23502862    | 0.78671429    | 1.0099477     | 0.46240602     | 0.54030613     | 0.68805327     | 4.781E-07 | -1.92986 | down      | PREDICTED: cell division cycle 20.2, cofactor of APC complex-like [Sesamum indicum]                         |
| c50665.graph_c0 | 2.23813461    | 4.10735557    | 1.91739439    | 15.7244122     | 15.6663944     | 14.268948      | 0.000167  | 1.37878  | up        | PREDICTED: pleiotropic drug resistance protein 2-like [Sesamum indicum]                                     |
| c50666.graph_c0 | 0.23901213    | 0.13956335    | 0.10238002    | 10.871516      | 10.4956266     | 9.30812487     | 1.02E-89  | 4.91348  | up        | PREDICTED: protein LONGIFOLIA 1 [Sesamum indicum]                                                           |
| c50671.graph_c0 | 5.04412659    | 5.86457265    | 5.91825869    | 2.75522421     | 2.71386451     | 2.34114296     | 1.369E-34 | -2.20025 | down      | PREDICTED: uncharacterized protein LOC105159806 [Sesamum indicum]                                           |
| c50675.graph_c0 | 4.38530982    | 4.81111235    | 3.69675466    | 1.37687813     | 1.611545       | 2.87122114     | 2.411E-20 | -2.22256 | down      | PREDICTED: BTB/POZ domain-containing protein NPY4-like [Sesamum indicum]                                    |
| c50679.graph_c0 | 2.58355395    | 2.58614099    | 2.45923638    | 13.8394338     | 14.6515876     | 14.5085886     | 1.984E-18 | 1.40492  | up        | PREDICTED: uncharacterized protein LOC105164931 [Sesamum indicum]                                           |

| #ID             | 0 h-1<br>FPKM | 0 h-2<br>FPKM | 0 h-3<br>FPKM | 28 h-1<br>FPKM | 28 h-2<br>FPKM | 28 h-3<br>FPKM | FDR       | log2FC   | regulated | nr_annotation                                                                              |
|-----------------|---------------|---------------|---------------|----------------|----------------|----------------|-----------|----------|-----------|--------------------------------------------------------------------------------------------|
| c50680.graph_c0 | 345.41294     | 353.58575     | 361.081399    | 135.965866     | 131.689277     | 145.972557     | 2.58E-174 | -2.44839 | down      | PREDICTED: transcription factor HBP-1b(c38)-like [Sesamum indicum]                         |
| c50681.graph_c0 | 1.63616802    | 1.09187093    | 0.87605862    | 10.5042245     | 8.67905654     | 9.54170418     | 2.836E-06 | 1.91135  | up        | -                                                                                          |
| c50683.graph_c0 | 7.53892895    | 5.65985854    | 5.65122961    | 0.68490626     | 1.0306769      | 1.11775584     | 2.155E-16 | -3.82041 | down      | hypothetical protein MIMGU_mgv1a022/29mg [Erythranthe outtata]                             |
| c50685.graph_c0 | 40.9749491    | 44.192071     | 38.0988354    | 31.6152831     | 27.7844194     | 28.8733168     | 1.14E-59  | -1.57113 | down      | hypothetical protein MIMGU_mgv1a008021mg [Erythranthe outtata]                             |
| c50687.graph_c0 | 1.87746579    | 0.51254885    | 1.09664449    | 6.82265658     | 5.71220327     | 9.2112385      | 0.0029139 | 1.55792  | up        | -                                                                                          |
| c50690.graph_c0 | 0             | 0.03794991    | 0             | 2.61764774     | 2.5874001      | 2.42827107     | 6.706E-18 | 6.57009  | up        | PREDICTED: uncharacterized protein LOC105174731 [Sesamum indicum]                          |
| c50693.graph_c0 | 273.781085    | 280.142221    | 299.616389    | 51.7252234     | 54.2959637     | 50.73899       | 3.56E-137 | -3.53685 | down      | PREDICTED: organic cation/carnitine transporter 3-like [Sesamum indicum]                   |
| c50694.graph_c0 | 0             | 0             | 0             | 1.41489929     | 2.23566245     | 1.8857589      | 6.844E-16 | Inf      | up        | PREDICTED: protein kinase PINOID [Sesamum indicum]                                         |
| c50696.graph_c0 | 0             | 0.0494687     | 0             | 3.59176032     | 2.6592787      | 2.98946403     | 5.317E-17 | 6.46371  | up        | PREDICTED: (RS)-norcochlorine 6-O-methyltransferase-like [Sesamum indicum]                 |
| c50700.graph_c0 | 0.99395712    | 2.27417697    | 1.64220976    | 29.3088937     | 38.5766119     | 27.7052961     | 8.618E-18 | 3.18823  | up        | -                                                                                          |
| c50702.graph_c0 | 0.20345731    | 0.13577403    | 0.17430047    | 2.11949297     | 1.8691987      | 2.89588849     | 2.608E-07 | 2.65739  | up        | -                                                                                          |
| c50703.graph_c0 | 0.7552396     | 0.54431701    | 0.23292307    | 11.021988      | 12.7867033     | 11.9320828     | 6.264E-51 | 3.46549  | up        | PREDICTED: fructokinase-like 2, chloroplastic [Sesamum indicum]                            |
| c50708.graph_c0 | 5.56235426    | 7.37269952    | 6.40841316    | 3.01110481     | 4.17881226     | 4.52731806     | 5.005E-13 | -1.81382 | down      | PREDICTED: UPF0496 protein 1-like [Sesamum indicum]                                        |
| c50711.graph_c0 | 0             | 0.05944843    | 0.15263434    | 1.94236003     | 1.71479635     | 1.16229661     | 4.478E-08 | 3.38757  | up        | -                                                                                          |
| c50715.graph_c0 | 0.20363145    | 0.47561584    | 0.34889931    | 4.80994044     | 4.34292525     | 4.58908125     | 6.06E-15  | 2.6467   | up        | PREDICTED: aspartic proteinase nepenthesin-2-like [Sesamum indicum]                        |
| c50718.graph_c0 | 11.2470347    | 12.1916272    | 10.6711715    | 5.40010725     | 4.99051502     | 4.38916324     | 4.369E-77 | -2.2969  | down      | PREDICTED: formin BNI1-like [Sesamum indicum]                                              |
| c50719.graph_c0 | 6.27084837    | 5.7064797     | 6.34895451    | 28.1743562     | 26.4987522     | 30.8224373     | 1.217E-09 | 1.13158  | up        | PREDICTED: transmembrane protein 256 homolog [Sesamum indicum]                             |
| c50721.graph_c0 | 2.07970969    | 0.80958586    | 1.33625465    | 6.54992441     | 6.975449       | 6.23546564     | 0.0040803 | 1.13885  | up        | PREDICTED: LOW QUALITY PROTEIN: GDSL esterase/lipase At2g27360-like [Sesamum indicum]      |
| c50723.graph_c0 | 2.82617691    | 2.73470667    | 2.23957869    | 38.2395472     | 37.1540953     | 35.58892       | 2.364E-76 | 2.74275  | up        | hypothetical protein MIMGU_mgv1a005/11mg [Erythranthe outtata]                             |
| c50724.graph_c0 | 2.2845635     | 2.68456439    | 2.72301872    | 36.721478      | 36.9583511     | 33.4399854     | 4.05E-99  | 2.70685  | up        | PREDICTED: protein ASPARTIC PROTEASE IN GUARD CELL 1-like [Sesamum indicum]                |
| c50725.graph_c0 | 0.06516539    | 0.06523064    | 0             | 1.46821671     | 1.32566203     | 1.15940598     | 7.936E-08 | 3.85098  | up        | -                                                                                          |
| c50726.graph_c0 | 5.91185096    | 6.075578      | 7.09049837    | 2.57801952     | 3.51742832     | 3.5995667      | 3.319E-15 | -2.06899 | down      | PREDICTED: magnesium-dependent phosphatase 1-like [Sesamum indicum]                        |
| c50728.graph_c0 | 1.95585023    | 2.84772177    | 1.82788726    | 0.60306089     | 0.23336033     | 0.4217938      | 4.444E-13 | -3.48569 | down      | PREDICTED: UDP-glycosyltransferase /6C4-like [Sesamum indicum]                             |
| c50734.graph_c0 | 7.20201781    | 7.8138746     | 7.40390242    | 5.7071682      | 6.00679553     | 7.21973191     | 2.079E-14 | -1.33349 | down      | PREDICTED: putative chromatin-remodeling complex ATPase chain isoform X1 [Sesamum indicum] |
| c50735.graph_c0 | 0.28607846    | 0.28636492    | 0.18381107    | 7.27720609     | 6.00743753     | 7.04093831     | 1.086E-10 | 3.66363  | up        | PREDICTED: uncharacterized protein LOC104450130 [Eucalyptus grandis]                       |

| #ID             | 0 h-1<br>FPKM | 0 h-2<br>FPKM | 0 h-3<br>FPKM | 28 h-1<br>FPKM | 28 h-2<br>FPKM | 28 h-3<br>FPKM | FDR       | log2FC   | regulated | nr_annotation                                                                                       |
|-----------------|---------------|---------------|---------------|----------------|----------------|----------------|-----------|----------|-----------|-----------------------------------------------------------------------------------------------------|
| c50737.graph_c0 | 4.20627716    | 5.62608458    | 5.12565168    | 5.40263008     | 4.64011386     | 5.39772687     | 1.651E-06 | -1.04589 | down      | PREDICTED: uncharacterized protein LOC105171448 [Sesamum indicum]                                   |
| c50738.graph_c0 | 0             | 0             | 0.24172594    | 4.7508687      | 5.92518768     | 8.98048748     | 2.716E-10 | 5.21783  | up        | elongation factor 1-alpha [Lichtheimia corymbifera<br>TMC0-FST1-06821]                              |
| c50739.graph_c0 | 0.31447309    | 0.44969712    | 0.34638032    | 16.1622612     | 14.5930065     | 15.7459989     | 5.529E-56 | 4.2975   | up        | PREDICTED: uncharacterized protein LOC105163344 [Sesamum indicum]                                   |
| c50740.graph_c0 | 3.76372764    | 2.47925572    | 2.87071994    | 0              | 0              | 0              | 6.599E-48 | -Inf     | down      | hypothetical protein SELMODKAF1_118280 [Selaginella                                                 |
| c50742.graph_c0 | 7.37808179    | 7.71371292    | 7.37421005    | 46.9503299     | 46.0499168     | 42.2005361     | 4.612E-13 | 1.49844  | up        | hypothetical protein MIMGU_mgv1a016086mg [Erythranthe                                               |
| c50746.graph_c0 | 0.73528336    | 0.44161178    | 0.18897365    | 4.40879761     | 4.3426155      | 3.4885264      | 4.835E-09 | 2.08636  | up        | hypothetical protein MIMGU_mgv1a005428mg [Erythranthe                                               |
| c50747.graph_c0 | 10.3226229    | 11.1191629    | 11.044537     | 10.927442      | 10.9561835     | 10.8065122     | 7.909E-25 | -1.08226 | down      | PREDICTED: exocyst complex component EXO70B1 [Sesamum indicum]                                      |
| c50748.graph_c0 | 0.12265192    | 0             | 0.07880629    | 5.43770527     | 4.38656922     | 3.81883545     | 5.581E-17 | 4.99341  | up        | hypothetical protein MIMGU_mgv1a006179mg [Erythranthe                                               |
| c50749.graph_c0 | 0.23840847    | 0.2386472     | 0.20424288    | 3.46547797     | 3.65050197     | 3.1105819      | 4.523E-08 | 2.81868  | up        | PREDICTED: protein IRX15-LIKE-like [Nicotiana                                                       |
| c50763.graph_c0 | 1.80695601    | 2.08008021    | 2.28330984    | 26.0249353     | 29.0316857     | 28.0588457     | 9.489E-86 | 2.65843  | up        | component 5 of pyruvate dehydrogenase complex, chloroplastic<br>[Sesamum indicum]                   |
| c50766.graph_c0 | 1.18041195    | 0.89903888    | 1.15414486    | 20.8884043     | 22.6154852     | 19.4949526     | 4.622E-96 | 3.19253  | up        | PREDICTED: uncharacterized protein LOC105178721 [Sesamum indicum]                                   |
| c50767.graph_c0 | 6.10538876    | 6.48498308    | 5.84066267    | 3.94432121     | 3.62812759     | 3.78177733     | 7.238E-26 | -1.78863 | down      | PREDICTED: uncharacterized protein LOC102659506 [Glycine                                            |
| c50770.graph_c0 | 0.47975642    | 0.38418946    | 0.1233012     | 8.78684182     | 10.7671566     | 12.9742697     | 1.68E-15  | 3.96655  | up        | max1<br>cyclin D [Scutellaria baicalensis]                                                          |
| c50771.graph_c0 | 2.89812941    | 2.53129215    | 3.10350919    | 2.66390533     | 2.98326419     | 2.30852965     | 4.478E-08 | -1.19399 | down      | PREDICTED: pentatricopeptide repeat-containing protein<br>At3g05340 [Sesamum indicum]               |
| c50773.graph_c0 | 0.19101167    | 0             | 0.08181919    | 2.12866815     | 1.9637701      | 1.81249652     | 5.555E-09 | 3.35471  | up        | PREDICTED: probable leucine-rich repeat receptor-like protein<br>kinase At1g68400 [Sesamum indicum] |
| c50774.graph_c0 | 2.83675133    | 2.97481057    | 2.43022518    | 0.39271134     | 0.4432269      | 0.24033693     | 1.281E-17 | -4.02784 | down      | -                                                                                                   |
| c50776.graph_c0 | 17.667833     | 19.8000983    | 19.0021478    | 11.3055567     | 9.0736513      | 8.9974582      | 5.793E-18 | -2.03436 | down      | PREDICTED: RNA-binding protein cabeza [Nicotiana glauca]                                            |
| c50777.graph_c0 | 0             | 0             | 0             | 4.0922528      | 4.45285302     | 3.89578567     | 1.348E-17 | Inf      | up        | hypothetical protein CICLE_v10023373mg [Citrus clementina]                                          |
| c50779.graph_c0 | 2.50631299    | 2.58484761    | 1.75675168    | 2.98075718     | 2.04342805     | 1.66655778     | 0.0008265 | -1.12098 | down      | PREDICTED: uncharacterized protein LOC105126503 [Populus euphratica]                                |
| c50786.graph_c0 | 0.35852555    | 0.29907046    | 0.46071952    | 4.64690836     | 4.86233268     | 5.77635328     | 5.292E-11 | 2.67901  | up        | PREDICTED: uncharacterized protein LOC105162253 isoform X1<br>[Sesamum indicum]                     |
| c50787.graph_c0 | 0.36092687    | 0.44157456    | 0.46380531    | 2.30258285     | 3.00009966     | 2.87779172     | 3.218E-05 | 1.59848  | up        | -                                                                                                   |
| c50789.graph_c0 | 21.9447532    | 22.9743756    | 25.0953031    | 12.7301913     | 11.0978185     | 10.865329      | 1.092E-21 | -2.10553 | down      | PREDICTED: uncharacterized protein LOC102593092 [Solanum tuberosum]                                 |
| c50794.graph_c0 | 24.1375075    | 19.2950702    | 22.6582854    | 3.88185562     | 2.92079305     | 5.9493321      | 8.336E-52 | -3.46095 | down      | PREDICTED: cytochrome P450 86B1-like [Sesamum indicum]                                              |
| c50795.graph_c0 | 10.965696     | 9.76266621    | 8.57169893    | 8.88798493     | 8.38979057     | 8.6011328      | 2.081E-16 | -1.26672 | down      | PREDICTED: caffeoylshikimate esterase [Sesamum indicum]                                             |

| #ID             | 0 h-1<br>FPKM | 0 h-2<br>FPKM | 0 h-3<br>FPKM | 28 h-1<br>FPKM | 28 h-2<br>FPKM | 28 h-3<br>FPKM | FDR       | log2FC   | regulated | nr_annotation                                                                                             |
|-----------------|---------------|---------------|---------------|----------------|----------------|----------------|-----------|----------|-----------|-----------------------------------------------------------------------------------------------------------|
| c50796.graph_c0 | 0.72185373    | 0.12042943    | 0.15460177    | 2.5357558      | 2.44744972     | 4.06696185     | 0.005037  | 2.11205  | up        | PREDICTED: glucomannan 4-beta-mannosyltransferase 2-like [Sesamum indicum]                                |
| c50803.graph_c0 | 176.448717    | 201.715778    | 152.243778    | 56.093549      | 49.404702      | 54.0065382     | 2.349E-35 | -2.82157 | down      | -                                                                                                         |
| c50811.graph_c0 | 0.10369449    | 0.18164706    | 0.1665644     | 5.78422963     | 5.59687623     | 5.33485276     | 1.533E-34 | 4.11418  | up        | PREDICTED: probable inactive leucine-rich repeat receptor-like protein kinase At1g66830 [Sesamum indicum] |
| c50814.graph_c0 | 25.2028735    | 24.4352269    | 29.795755     | 9.31565705     | 10.4903292     | 12.3417614     | 2.3E-23   | -2.397   | down      | -                                                                                                         |
| c50818.graph_c0 | 1.40460155    | 1.15788898    | 1.27409549    | 38.4322376     | 37.791239      | 37.6814711     | 4.994E-66 | 3.80207  | up        | PREDICTED: uncharacterized protein LOC105164615 [Sesamum indicum]                                         |
| c50820.graph_c0 | 0.11291623    | 0.24220563    | 0.24874598    | 3.73990419     | 4.16011177     | 3.95098752     | 5.14E-31  | 3.19687  | up        | PREDICTED: probable RNA-dependent RNA polymerase 1 [Sesamum indicum]                                      |
| c50823.graph_c0 | 3.65353427    | 4.65460893    | 2.1340619     | 1.35182353     | 1.00261099     | 0.98489014     | 1.236E-05 | -2.72918 | down      | PREDICTED: uncharacterized protein LOC105158347 [Sesamum indicum]                                         |
| c50824.graph_c0 | 1.25416558    | 1.65487372    | 1.025597      | 9.73669431     | 11.1855545     | 10.3454863     | 2.481E-12 | 1.90288  | up        | PREDICTED: tetraspanin-3-like [Sesamum indicum]                                                           |
| c50830.graph_c0 | 0.02938713    | 0.02941655    | 0.03776362    | 4.18624539     | 3.72193321     | 4.54877998     | 2.161E-30 | 5.91796  | up        | PREDICTED: delta(8)-fatty-acid desaturase 2-like [Sesamum indicum]                                        |
| c50831.graph_c0 | 19.8766683    | 22.3290681    | 21.1384599    | 2.12844406     | 2.6168993      | 2.51280685     | 3.29E-158 | -4.21645 | down      | PREDICTED: uncharacterized protein LOC105179506 [Sesamum indicum]                                         |
| c50835.graph_c0 | 46.864079     | 46.3310625    | 44.5048653    | 23.6739485     | 23.7410079     | 25.5406598     | 2.776E-92 | -2.00597 | down      | PREDICTED: RING-H2 finger protein A1L8U-like [Sesamum indicum]                                            |
| c50836.graph_c0 | 0.39088309    | 0.68473037    | 0.75345036    | 3.1960302      | 3.20635069     | 4.11474117     | 0.0010974 | 1.42774  | up        | hypothetical protein JCGZ_25112 [Jatropha curcas]                                                         |
| c50838.graph_c0 | 24.7811436    | 29.5796133    | 23.7467728    | 17.2061865     | 20.1180084     | 17.9289145     | 1.702E-20 | -1.58921 | down      | ring finger protein, putative [Ricinus communis]                                                          |
| c50839.graph_c0 | 5.95162086    | 6.64189718    | 5.16761381    | 0.14613526     | 0.05277858     | 0.38158458     | 1.374E-98 | -6.01629 | down      | PREDICTED: E3 ubiquitin-protein ligase PUB23-like [Sesamum indicum]                                       |
| c50841.graph_c0 | 3.75864793    | 3.69970479    | 4.66901102    | 34.7389278     | 39.2588794     | 35.6655493     | 6.088E-42 | 2.08285  | up        | hypothetical protein MIMGU_mgv1a012263mg [Erythranthe outtata]                                            |
| c50843.graph_c0 | 0.14955928    | 0.14970904    | 0.1921896     | 1.35873528     | 1.32495541     | 1.4635063      | 0.0001675 | 1.98341  | up        | PREDICTED: serine/threonine-protein kinase D6PKL2 [Sesamum indicum]                                       |
| c50844.graph_c0 | 0             | 0             | 0             | 3.38486775     | 2.57868412     | 3.62515708     | 4.249E-11 | Inf      | up        | -                                                                                                         |
| c50849.graph_c0 | 29.5396833    | 28.7478944    | 34.309695     | 23.0290049     | 20.5030896     | 22.0481707     | 6.819E-17 | -1.59023 | down      | PREDICTED: polyadenylate-binding protein-interacting protein 6-like [Sesamum indicum]                     |
| c50851.graph_c0 | 2.21116078    | 2.2896982     | 1.2737441     | 14.4635302     | 14.1099529     | 14.6056919     | 1.018E-11 | 1.81878  | up        | PREDICTED: fibroin heavy chain [Sesamum indicum]                                                          |
| c50852.graph_c0 | 5.35562966    | 5.39874598    | 5.81594041    | 4.63255275     | 4.43026142     | 3.98143365     | 5.691E-15 | -1.4374  | down      | PREDICTED: F-box/kelch-repeat protein At3g23880-like [Sesamum indicum]                                    |
| c50857.graph_c0 | 0.06191221    | 0             | 0             | 2.02488459     | 1.747024       | 1.50541913     | 1.441E-12 | 5.35365  | up        | PREDICTED: uncharacterized protein LOC105165400 [Sesamum indicum]                                         |
| c50859.graph_c0 | 0.36126166    | 0.39778575    | 0.13927066    | 9.37349536     | 9.60132191     | 9.89831204     | 1.033E-39 | 3.92632  | up        | -                                                                                                         |
| c50868.graph_c0 | 5.20226469    | 3.85738813    | 5.44713163    | 23.2460005     | 23.7706282     | 24.3391592     | 2.438E-05 | 1.2064   | up        | hypothetical protein PHAVU_008G011200g [Phaseolus vulgaris]                                               |



| #ID             | 0 h-1<br>FPKM | 0 h-2<br>FPKM | 0 h-3<br>FPKM | 28 h-1<br>FPKM | 28 h-2<br>FPKM | 28 h-3<br>FPKM | FDR       | log2FC   | regulated | nr_annotation                                                                                     |
|-----------------|---------------|---------------|---------------|----------------|----------------|----------------|-----------|----------|-----------|---------------------------------------------------------------------------------------------------|
| c50871.graph_c0 | 1.21390322    | 1.57515395    | 2.13765952    | 16.7628995     | 15.7844049     | 17.624591      | 7.786E-31 | 2.25121  | up        | PREDICTED: protein arginine N-methyltransferase PRMT10 isoform X1 [Sesamum indicum]               |
| c50874.graph_c0 | 7.45218227    | 11.7222985    | 14.1365156    | 474.820474     | 449.094718     | 446.166874     | 0         | 4.26455  | up        | hypothetical protein JCGZ_21814 [Jatropha curcas]                                                 |
| c50879.graph_c0 | 5.33924024    | 4.9882809     | 4.80279457    | 0.77610581     | 0.46716718     | 0.42219733     | 4.43E-21  | -4.27399 | down      | -                                                                                                 |
| c50880.graph_c0 | 1.48593803    | 1.40629364    | 1.21512949    | 8.24705275     | 8.77601457     | 9.03679433     | 6.213E-16 | 1.57771  | up        | PREDICTED: peptide-N4-(N-acetyl-beta-glucosaminy)asparagine amidase A-like [Sesamum indicum]      |
| c50883.graph_c0 | 3.51069822    | 1.9388765     | 1.40008537    | 13.9015768     | 13.6640071     | 14.2153638     | 2.556E-06 | 1.52874  | up        | PREDICTED: uncharacterized protein LOC105175099 [Sesamum indicum]                                 |
| c50885.graph_c0 | 0.05306334    | 0             | 0.06818849    | 4.70506771     | 3.76073262     | 4.24840223     | 4.007E-19 | 5.6131   | up        | hypothetical protein MIMGU_mgv1a0106/6mg [Erythranthe ontifata]                                   |
| c50890.graph_c0 | 3.04018261    | 3.62846283    | 3.75649521    | 31.6990779     | 31.1534742     | 32.0380139     | 1.694E-20 | 2.0935   | up        | PREDICTED: ADP-ribosylation factor GTPase-activating protein AGD3-like [Sesamum indicum]          |
| c50892.graph_c0 | 0.84437723    | 1.2960082     | 0.86804653    | 23.5656384     | 26.7447134     | 21.6330396     | 9.868E-53 | 3.48942  | up        | PREDICTED: endo-1,5;1,4-beta-D-glucanase-like [Sesamum indicum]                                   |
| c50894.graph_c0 | 6.84003352    | 7.74778841    | 5.93691201    | 33.5344504     | 35.0820702     | 29.3565229     | 4.091E-16 | 1.16586  | up        | PREDICTED: auxin-induced protein X15-like [Sesamum indicum]                                       |
| c50896.graph_c0 | 0.27197032    | 0.11667543    | 0.17474632    | 14.1190332     | 15.004588      | 14.4934378     | 1.36E-135 | 5.18848  | up        | PREDICTED: WEB family protein At3g02930, chloroplastic-like [Sesamum indicum]                     |
| c50897.graph_c0 | 1.38358736    | 1.84663042    | 1.64626346    | 0.48416975     | 0.67255367     | 0.66859448     | 5.381E-11 | -2.50913 | down      | PREDICTED: RING-H2 finger protein A1L16-like [Sesamum indicum]                                    |
| c50901.graph_c0 | 0             | 0             | 0.12787867    | 1.95279582     | 1.2734161      | 1.50493958     | 1.339E-10 | 4.07923  | up        | hypothetical protein MIMGU_mgv1a012192mg [Erythranthe ontifata]                                   |
| c50904.graph_c0 | 3.83982119    | 1.38371983    | 1.77635601    | 25.6749912     | 28.8264496     | 26.3248632     | 1.691E-16 | 2.44736  | up        | hypothetical protein EMIHUDDRAFT_447448 [Emilia huxleyi CCMP1516]                                 |
| c50906.graph_c0 | 0.02424172    | 0             | 0             | 10.1836326     | 9.27440579     | 8.74106352     | 4.761E-87 | 9.12463  | up        | PREDICTED: probable LRR receptor-like serine/threonine-protein kinase At4g26540 [Sesamum indicum] |
| c50907.graph_c0 | 563.298612    | 588.693763    | 568.599103    | 147.141056     | 145.57855      | 153.110622     | 3.1E-225  | -3.03865 | down      | hypothetical protein MIMGU_mgv1a008586mg [Erythranthe ontifata]                                   |
| c50912.graph_c0 | 0             | 0             | 0             | 3.31876805     | 2.44615215     | 2.43175215     | 2.743E-14 | Inf      | up        | PREDICTED: uncharacterized protein LOC105157276 [Sesamum indicum]                                 |
| c50915.graph_c0 | 2308.10462    | 2107.65866    | 1983.73098    | 409.642676     | 366.048778     | 387.55628      | 0         | -3.54849 | down      | hypothetical protein NitaMp027 [Nicotiana tabacum]                                                |
| c50917.graph_c0 | 7.37066986    | 4.01693859    | 4.84104132    | 0              | 0              | 0              | 3.98E-26  | -Inf     | down      | --                                                                                                |
| c50920.graph_c0 | 0             | 0.05184221    | 0             | 3.1994789      | 3.8744301      | 4.33077129     | 3.709E-19 | 6.70046  | up        | PREDICTED: DNA-damage-repair/tolerant protein DRT100-like [Sesamum indicum]                       |
| c50921.graph_c0 | 0.58956557    | 0.46591257    | 0.43861926    | 11.8624864     | 12.0953679     | 10.2501682     | 5.379E-48 | 3.42902  | up        | PREDICTED: glucan endo-1,5-beta-glucosidase 2-like [Sesamum indicum]                              |
| c50926.graph_c0 | 11.1841858    | 12.0510833    | 9.52038623    | 3.57244281     | 3.85667283     | 3.97127408     | 2.71E-50  | -2.61068 | down      | PREDICTED: putative nuclease HARBII [Sesamum indicum]                                             |
| c50930.graph_c0 | 0.06750493    | 0.06757253    | 0             | 3.67966479     | 3.49958656     | 4.12353829     | 9.431E-15 | 5.31714  | up        | PREDICTED: NADPH:quinone oxidoreductase [Sesamum indicum]                                         |
| c50940.graph_c0 | 0.02189264    | 0.08765823    | 0.05626581    | 1.82981576     | 1.93948287     | 1.81770488     | 6.87E-16  | 3.97883  | up        | LINE-1 reverse transcriptase like [Glycine soja]                                                  |
| c50942.graph_c0 | 108.411885    | 114.415537    | 109.367658    | 43.1705366     | 46.3342493     | 51.5633302     | 1.97E-164 | -2.32551 | down      | PREDICTED: uncharacterized protein LOC105163758 [Sesamum indicum]                                 |

| #ID             | 0 h-1<br>FPKM | 0 h-2<br>FPKM | 0 h-3<br>FPKM | 28 h-1<br>FPKM | 28 h-2<br>FPKM | 28 h-3<br>FPKM | FDR       | log2FC   | regulated | nr_annotation                                                                                                     |
|-----------------|---------------|---------------|---------------|----------------|----------------|----------------|-----------|----------|-----------|-------------------------------------------------------------------------------------------------------------------|
| c50948.graph_c0 | 2.92707014    | 2.74687609    | 2.40964753    | 12.3321427     | 12.8455012     | 12.6396882     | 9.583E-09 | 1.13779  | up        | hypothetical protein MIMGU_mgv1a009797mg [Erythranthe<br>outfata]                                                 |
| c50949.graph_c0 | 22.3746796    | 21.4179769    | 21.2107494    | 15.2843036     | 16.7689609     | 16.5687302     | 1.819E-35 | -1.50879 | down      | PREDICTED: mitogen-activated protein kinase kinase 9-like<br>[Sesamum indicum]                                    |
| c50952.graph_c0 | 5.13309968    | 4.71005306    | 4.39749088    | 41.5041183     | 45.1937582     | 41.6044311     | 3.415E-15 | 2.08245  | up        | -                                                                                                                 |
| c50955.graph_c0 | 7.16955544    | 6.45906119    | 6.26495056    | 7.2951082      | 6.21041022     | 5.35747384     | 9.354E-05 | -1.16669 | down      | -                                                                                                                 |
| c50957.graph_c0 | 6.70870104    | 6.41977142    | 5.80151742    | 368.724297     | 485.042693     | 334.456822     | 8.368E-36 | 4.88184  | up        | PREDICTED: basic 7S globulin-like [Sesamum indicum]                                                               |
| c50959.graph_c0 | 0.15850677    | 0.23799823    | 0             | 6.27849833     | 7.64520745     | 6.48625747     | 1.88E-17  | 4.61267  | up        | hypothetical protein JCGZ_13997 [Jatropha curcas]                                                                 |
| c50961.graph_c0 | 0             | 0             | 0             | 8.68034174     | 8.27908599     | 9.97618025     | 6.277E-17 | Inf      | up        | -                                                                                                                 |
| c50963.graph_c0 | 93.6727037    | 96.6244078    | 85.1696695    | 57.9526534     | 59.3739611     | 55.674305      | 1.076E-95 | -1.76058 | down      | PREDICTED: zinc finger A20 and AN1 domain-containing stress-<br>associated protein 4 isoform X1 [Sesamum indicum] |
| c50965.graph_c0 | 91.1674743    | 90.4654259    | 90.8650201    | 40.8432297     | 39.33178       | 42.7429391     | 3.61E-162 | -2.23873 | down      | PREDICTED: probable ribose-5-phosphate isomerase 1 [Sesamum<br>indicum]                                           |
| c50969.graph_c0 | 12.3235742    | 12.9425987    | 8.56716827    | 3.37711741     | 2.12119679     | 3.47457855     | 1.288E-17 | -2.99918 | down      | -                                                                                                                 |
| c50970.graph_c0 | 0.18549034    | 0.18567608    | 0.11918122    | 4.92068592     | 5.2949845      | 5.88535109     | 1.619E-12 | 3.95273  | up        | PREDICTED: putative B3 domain-containing protein At5g66980<br>[Sesamum indicum]                                   |
| c50977.graph_c0 | 15.0390245    | 16.7979375    | 14.6656339    | 85.5042182     | 93.41734       | 90.2865896     | 1.896E-61 | 1.44341  | up        | hypothetical protein MIMGU_mgv1a020088mg [Erythranthe<br>outfata]                                                 |
| c50978.graph_c0 | 2.86038043    | 1.82206479    | 1.44800386    | 1.82691916     | 1.30825325     | 0.77107816     | 0.0010902 | -1.73556 | down      | -                                                                                                                 |
| c50981.graph_c0 | 21.0499929    | 11.1748953    | 12.5615121    | 0              | 0              | 0              | 5.33E-26  | -Inf     | down      | cytochrome b (mitochondrion) [Gracilaria salicornia]                                                              |
| c50983.graph_c0 | 38.5825151    | 40.7286489    | 36.8075314    | 37.614109      | 40.2596058     | 35.193643      | 1.093E-35 | -1.12873 | down      | PREDICTED: ATP synthase delta chain, chloroplastic-like<br>[Sesamum indicum]                                      |
| c50984.graph_c0 | 0.03940448    | 0.09860984    | 0.15190895    | 8.76351834     | 7.49890283     | 6.4265158      | 2.909E-41 | 5.18498  | up        | PREDICTED: putative late blight resistance protein homolog R1A-<br>10 [Sesamum indicum]                           |
| c50987.graph_c0 | 9.42447382    | 11.7923888    | 8.96200827    | 55.1397087     | 54.3007412     | 53.3774437     | 3.291E-21 | 1.3423   | up        | unnamed protein product [Coffea canephora]                                                                        |
| c50996.graph_c0 | 11.5997631    | 12.7790032    | 14.239958     | 0.70647829     | 0.72293482     | 1.61414545     | 7.176E-61 | -4.75425 | down      | SLF-interacting SKP1-like protein 1, partial [Antirrhinum<br>hispanicum]                                          |
| c50997.graph_c0 | 29.8601201    | 24.7167477    | 23.6131917    | 20.7283482     | 18.9669731     | 18.1628594     | 5.727E-16 | -1.52272 | down      | hypothetical protein MIMGU_mgv1a001564mg [Erythranthe<br>outfata]                                                 |
| c50999.graph_c0 | 1.45655389    | 1.12154801    | 1.0798439     | 10.341854      | 10.2935546     | 9.83427183     | 6.333E-13 | 1.97082  | up        | PREDICTED: probable F-actin-capping protein subunit beta<br>isoform X2 [Sesamum indicum]                          |
| c51000.graph_c0 | 0             | 0             | 0             | 1.60708811     | 0.99423788     | 1.26280149     | 2.017E-12 | Inf      | up        | PREDICTED: polygalacturonase-like [Sesamum indicum]                                                               |
| c51004.graph_c0 | 6.4841629     | 6.62875487    | 6.91412417    | 48.530291      | 52.9622046     | 51.9549668     | 5.572E-23 | 1.84641  | up        | putative, proteolipid subunit of vacuolar H <sup>+</sup> ATPase, partial [Zea<br>mays]                            |
| c51010.graph_c0 | 0.04377754    | 0             | 0             | 1.04996979     | 0.89056826     | 0.80484151     | 3.82E-09  | 4.91107  | up        | PREDICTED: uncharacterized protein LOC105169592 [Sesamum<br>indicum]                                              |
| c51014.graph_c0 | 0.42433391    | 0.79288312    | 0.72704783    | 2.87843209     | 2.97023348     | 2.71787062     | 0.0006272 | 1.04399  | up        | PREDICTED: polyprenol reductase 2 [Sesamum indicum]                                                               |
| c51018.graph_c0 | 8.81333327    | 7.81710246    | 7.1680267     | 1.94596856     | 1.39097983     | 2.51416621     | 1.126E-25 | -3.10989 | down      | PREDICTED: pathogenesis-related genes transcriptional activator<br>PTI6-like [Sesamum indicum]                    |

| #ID             | 0 h-1<br>FPKM | 0 h-2<br>FPKM | 0 h-3<br>FPKM | 28 h-1<br>FPKM | 28 h-2<br>FPKM | 28 h-3<br>FPKM | FDR       | log2FC   | regulated | nr_annotation                                                                |
|-----------------|---------------|---------------|---------------|----------------|----------------|----------------|-----------|----------|-----------|------------------------------------------------------------------------------|
| c51019.graph_c0 | 2.0326933     | 2.03472874    | 1.52132794    | 12.4032443     | 13.3830584     | 11.6576342     | 7.247E-28 | 1.65672  | up        | PREDICTED: two-component response regulator ARR12-like [Sesamum indicum]     |
| c51021.graph_c0 | 0.67065068    | 0.44754815    | 0.71817722    | 3.1682628      | 3.30074337     | 4.37508342     | 0.0010307 | 1.47079  | up        | -                                                                            |
| c51022.graph_c0 | 5.67195016    | 5.67762976    | 6.59921074    | 33.5357986     | 42.9548975     | 33.8197902     | 1.225E-12 | 1.52618  | up        | PREDICTED: uncharacterized protein LOC105178343 [Sesamum indicum]            |
| c51026.graph_c0 | 0.37198926    | 0.22341705    | 0             | 2.48730881     | 2.05051911     | 2.64733523     | 2.035E-06 | 2.52652  | up        | PREDICTED: uncharacterized protein LOC105161197 [Sesamum indicum]            |
| c51029.graph_c0 | 3.3684447     | 3.73965234    | 4.87949559    | 0.68993774     | 0.68323449     | 0.54482281     | 2.063E-16 | -3.74026 | down      | PREDICTED: uncharacterized protein LOC104606632 [Nelumbo nucifera]           |
| c51031.graph_c0 | 0             | 0             | 0.05980424    | 0.94707625     | 1.25214155     | 0.96600811     | 4.578E-10 | 4.59487  | up        | PREDICTED: uncharacterized protein C594.04c [Sesamum indicum]                |
| c51032.graph_c0 | 1.47571685    | 2.33241247    | 0.99808136    | 7.95939438     | 8.56274179     | 9.16642101     | 3.577E-05 | 1.33363  | up        | hypothetical protein M569_01741 [Genlisea aurea]                             |
| c51033.graph_c0 | 3.87345378    | 2.90799935    | 3.24922846    | 3.59720496     | 3.38915354     | 2.99910052     | 3.132E-05 | -1.09608 | down      | PREDICTED: uncharacterized protein LOC105173717 [Sesamum indicum]            |
| c51036.graph_c0 | 0.20898547    | 0.17432895    | 0.0895182     | 1.82267322     | 2.12569974     | 1.59057025     | 2.178E-07 | 2.46804  | up        | PREDICTED: beta-amyrin 28-oxidase-like [Sesamum indicum]                     |
| c51037.graph_c0 | 13.7724466    | 16.1810301    | 17.6150493    | 102.447051     | 101.283347     | 104.341559     | 4.592E-61 | 1.60197  | up        | unnamed protein product [Coffea canephora]                                   |
| c51039.graph_c0 | 0.96177684    | 1.51287702    | 1.41248151    | 1.69760511     | 1.21720625     | 1.14077922     | 0.0098293 | -1.03355 | down      | PREDICTED: uncharacterized protein LOC105173120 [Sesamum indicum]            |
| c51043.graph_c0 | 5.25502725    | 6.1185471     | 6.25533463    | 27.117197      | 28.2594766     | 27.0974674     | 8.116E-26 | 1.13346  | up        | PREDICTED: probable acyl-activating enzyme 1, peroxisomal [Sesamum indicum]  |
| c51044.graph_c0 | 30.9481898    | 31.6448481    | 38.0605403    | 0.07435691     | 0.03356866     | 0.1820239      | 7.88E-109 | -9.52597 | down      | PREDICTED: uncharacterized protein LOC104420277 [Eucalyptus grandis]         |
| c51046.graph_c1 | 0.24642126    | 0.49333603    | 0.94998324    | 8.05938994     | 11.8047059     | 14.7603563     | 1.122E-06 | 3.25273  | up        | -                                                                            |
| c51050.graph_c0 | 0.30227914    | 0.33620202    | 0.30212051    | 23.8979049     | 23.2526391     | 20.3570032     | 5.8E-120  | 5.07444  | up        | PREDICTED: protein TRANSPARENT TESTA 12-like [Sesamum indicum]               |
| c51051.graph_c0 | 0.63924203    | 0.2399558     | 0.30804425    | 2.03261373     | 2.77910743     | 2.1798693      | 0.0017309 | 1.47495  | up        | PREDICTED: uncharacterized protein LOC105159339 isoform X2 [Sesamum indicum] |
| c51053.graph_c0 | 7.72952234    | 7.57935897    | 5.47314368    | 0.11464841     | 0.62110061     | 0.46776085     | 2.393E-32 | -5.19621 | down      | hypothetical protein MIMGU_mgv1a015250mg [Erythranthe outifata]              |
| c51054.graph_c0 | 34.2469858    | 20.1978457    | 17.9680625    | 0              | 0              | 0              | 2.499E-31 | -Inf     | down      | uncharacterized protein LOC100274422 [Zea mays]                              |
| c51055.graph_c0 | 0.25744471    | 0.04295042    | 0.11027555    | 0.8108071      | 1.15443825     | 0.78884504     | 0.0022201 | 1.66342  | up        | PREDICTED: uncharacterized protein PB18E9.04c [Sesamum indicum]              |
| c51057.graph_c0 | 0             | 0             | 0             | 7.22644684     | 8.41605147     | 9.57149015     | 7.925E-18 | Inf      | up        | PREDICTED: uncharacterized protein LOC105177738 [Sesamum indicum]            |
| c51059.graph_c0 | 7.69323132    | 9.64732507    | 6.73558927    | 1.84331742     | 4.2718132      | 3.40936579     | 5.653E-14 | -2.42628 | down      | PREDICTED: E3 ubiquitin-protein ligase RHA1B-like [Sesamum indicum]          |
| c51060.graph_c0 | 0.33298763    | 0.26665685    | 0.21395114    | 2.39593356     | 2.11960026     | 1.73783308     | 1.021E-05 | 1.85579  | up        | PREDICTED: PTI1-like tyrosine-protein kinase At3g15890 [Sesamum indicum]     |

| #ID             | 0 h-1<br>FPKM | 0 h-2<br>FPKM | 0 h-3<br>FPKM | 28 h-1<br>FPKM | 28 h-2<br>FPKM | 28 h-3<br>FPKM | FDR       | log2FC   | regulated | nr_annotation                                                                             |
|-----------------|---------------|---------------|---------------|----------------|----------------|----------------|-----------|----------|-----------|-------------------------------------------------------------------------------------------|
| c51061.graph_c0 | 9.63089819    | 10.5843714    | 9.52006575    | 1.12582287     | 1.54686683     | 1.75744085     | 1.412E-63 | -3.83576 | down      | -                                                                                         |
| c51063.graph_c0 | 6.07591027    | 4.18137113    | 4.3918792     | 1.93197225     | 2.24278689     | 1.75664199     | 3.743E-13 | -2.39239 | down      | -                                                                                         |
| c51066.graph_c0 | 0.48968106    | 0.14004897    | 0.26968267    | 2.26249045     | 2.68550066     | 2.26104423     | 2.424E-06 | 1.91801  | up        | PREDICTED: guanine nucleotide-binding protein subunit beta-like protein [Sesamum indicum] |
| c51067.graph_c0 | 0.4224885     | 0.53568798    | 0.61530305    | 4.29887094     | 2.86489999     | 3.89203597     | 4.098E-07 | 1.7187   | up        | PREDICTED: spindle pole body protein pcp1 [Sesamum indicum]                               |
| c51070.graph_c0 | 10.0991523    | 7.37703126    | 8.41803926    | 53.363825      | 46.749593      | 46.4582002     | 2.756E-08 | 1.4118   | up        | PREDICTED: ER membrane protein complex subunit 4 [Sesamum indicum]                        |
| c51071.graph_c0 | 0.59232435    | 0.75462224    | 0.4843747     | 2.66125991     | 2.93291263     | 2.87413194     | 0.0063864 | 1.12184  | up        | PREDICTED: protein disulfide-isomerase SCO2 [Sesamum indicum]                             |
| c51073.graph_c0 | 3.54989601    | 1.85748559    | 2.90293622    | 2.16958242     | 2.01187355     | 1.81820915     | 0.0006865 | -1.55983 | down      | -                                                                                         |
| c51074.graph_c0 | 0             | 0.27968341    | 0             | 6.14283556     | 8.1133356      | 7.49804266     | 9.324E-22 | 5.19969  | up        | -                                                                                         |
| c51076.graph_c0 | 24.0265811    | 27.2439183    | 21.0158298    | 126.932431     | 121.391823     | 116.244408     | 2.8E-46   | 1.24564  | up        | PREDICTED: protein ETHYLENE INSENSITIVE 3 [Sesamum indicum]                               |
| c51078.graph_c0 | 19.5028141    | 15.5591607    | 12.6251617    | 14.3876837     | 14.4341438     | 12.0011265     | 1.346E-06 | -1.31055 | down      | Dof zinc finger DOF5.2 -like protein [Gossypium arboreum]                                 |
| c51081.graph_c0 | 0.15947166    | 0.63852538    | 0.81970958    | 4.28841403     | 6.06967773     | 4.44507051     | 1.156E-05 | 2.08858  | up        | PREDICTED: uncharacterized protein LOC105170400 [Sesamum indicum]                         |
| c51084.graph_c0 | 20.8119302    | 20.2289218    | 15.891454     | 13.1530356     | 13.8552842     | 12.3426851     | 1.478E-16 | -1.62049 | down      | PREDICTED: 5'-adenylylsulfate reductase-like 5 isoform X2 [Sesamum indicum]               |
| c51087.graph_c0 | 0.33009987    | 0.49564563    | 0.70698568    | 6.03785294     | 6.06537309     | 5.93830889     | 5.458E-12 | 2.45761  | up        | PREDICTED: protein CURVATURE THYLAKOID 1D, chloroplastic [Sesamum indicum]                |
| c51088.graph_c0 | 1.01111028    | 0.70848593    | 0.5197267     | 33.8774668     | 34.5029319     | 37.4179857     | 3.876E-58 | 4.47962  | up        | PREDICTED: indole-3-acetic acid-induced protein ARG7-like [Nicotiana glauca]              |
| c51090.graph_c0 | 13.1168316    | 15.8465108    | 15.6931894    | 8.5470406      | 8.60761972     | 7.77904402     | 1.829E-21 | -1.93357 | down      | hypothetical protein MIMGU_mgv1a01/555mg [Erythranthe outifata]                           |
| c51097.graph_c0 | 2.50639066    | 1.69520299    | 1.82802799    | 26.5859555     | 27.872037      | 27.5593165     | 9.986E-40 | 2.67859  | up        | PREDICTED: 30S ribosomal protein S20, chloroplastic isoform X1 [Sesamum indicum]          |
| c51098.graph_c0 | 20.595011     | 17.8920236    | 19.687679     | 20.3837086     | 17.9650654     | 18.2465832     | 2.648E-26 | -1.13016 | down      | PREDICTED: pre-mRNA-splicing factor 38 [Sesamum indicum]                                  |
| c51100.graph_c0 | 0.03555325    | 0             | 0             | 1.05943577     | 1.7498253      | 1.45487498     | 1.745E-11 | 5.84697  | up        | hypothetical protein MIMGU_mgv1a004964mg [Erythranthe outifata]                           |
| c51103.graph_c0 | 5.4975839     | 2.82209687    | 6.15889336    | 0              | 0              | 0              | 1.376E-13 | -Inf     | down      | 40S ribosomal protein S16 [Arabidopsis lyrata subsp. lyrata]                              |
| c51104.graph_c0 | 118.04178     | 114.260312    | 116.895156    | 33.9770636     | 38.6032793     | 35.7537062     | 5.27E-202 | -2.77926 | down      | -                                                                                         |
| c51106.graph_c0 | 0.08227375    | 0             | 0             | 2.93000838     | 2.59153259     | 2.00051795     | 2.059E-12 | 5.45433  | up        | PREDICTED: transcription factor HEC2-like [Sesamum indicum]                               |
| c51110.graph_c0 | 8.75421562    | 4.8196399     | 6.56221631    | 224.384641     | 247.12013      | 237.176858     | 2.38E-213 | 4.04932  | up        | beta-tubulin [Deschampsia antarctica]                                                     |
| c51112.graph_c0 | 0.09563642    | 0             | 0             | 3.54490797     | 2.76140508     | 2.09856452     | 8.598E-10 | 5.39708  | up        | PREDICTED: major allergen Pru ar 1-like [Sesamum indicum]                                 |
| c51114.graph_c0 | 2.84344351    | 2.53003626    | 1.35331018    | 1.76043564     | 1.24396303     | 1.87369709     | 0.0013849 | -1.54425 | down      | PREDICTED: lysine-specific demethylase JM18 [Sesamum indicum]                             |
| c51116.graph_c0 | 6.77944461    | 3.98322383    | 5.68164439    | 0              | 0              | 0              | 2.118E-25 | -Inf     | down      | ribosomal protein L27                                                                     |

| #ID             | 0 h-1<br>FPKM | 0 h-2<br>FPKM | 0 h-3<br>FPKM | 28 h-1<br>FPKM | 28 h-2<br>FPKM | 28 h-3<br>FPKM | FDR       | log2FC   | regulated | nr_annotation                                                                                      |
|-----------------|---------------|---------------|---------------|----------------|----------------|----------------|-----------|----------|-----------|----------------------------------------------------------------------------------------------------|
| c51117.graph_c0 | 6.73336377    | 2.77533785    | 4.07183013    | 0              | 0              | 0              | 1.613E-11 | -Inf     | down      | hypothetical protein MVLG_03147 [Microbotryum violaceum p1A1 Lamole]                               |
| c51118.graph_c0 | 0.36927205    | 0.36964182    | 0.42707629    | 5.58240383     | 5.74313356     | 5.56259504     | 2.034E-17 | 2.76373  | up        | PREDICTED: beta-1,4-mannosyl-glycoprotein 4-beta-N-acetylglucosaminyltransferase [Sesamum indicum] |
| c51119.graph_c0 | 4.64115492    | 3.98211629    | 2.98203391    | 0.40156722     | 0.50760857     | 0.39321069     | 1.662E-23 | -4.24176 | down      | -                                                                                                  |
| c51126.graph_c0 | 14.5385011    | 13.2796666    | 12.610721     | 12.4156361     | 12.3430966     | 10.8316096     | 5.783E-13 | -1.27343 | down      | PREDICTED: suppressor of glycerol defect protein 1 isoform X2 [Sesamum indicum]                    |
| c51132.graph_c0 | 3.72277151    | 3.07841247    | 3.0679415     | 43.6733477     | 48.5675717     | 48.2360681     | 9.91E-106 | 2.74293  | up        | PREDICTED: 24-methylenesterol C-methyltransferase 2-like [Sesamum indicum]                         |
| c51133.graph_c0 | 0             | 0             | 0.89156985    | 13.8670165     | 13.5450298     | 15.224319      | 1.089E-17 | 4.44995  | up        | -                                                                                                  |
| c51138.graph_c0 | 19.295474     | 16.1705264    | 15.9152178    | 1.89158762     | 3.06248848     | 2.34189249     | 8.957E-84 | -3.90522 | down      | hypothetical protein MIMGU_mgv1a008111mg [Erythranthe diffusa]                                     |
| c51148.graph_c0 | 0.03963936    | 0.0793581     | 0.05093814    | 2.47763045     | 2.26308042     | 2.4918951      | 8.903E-14 | 4.32063  | up        | PREDICTED: GDSL esterase/lipase 7 [Sesamum indicum]                                                |
| c51153.graph_c0 | 7.0969408     | 8.28051375    | 6.33161554    | 4.99374766     | 6.5260191      | 5.06676336     | 2.003E-14 | -1.47779 | down      | hypothetical protein MIMGU_mgv1a020/4/mg [Erythranthe diffusa]                                     |
| c51154.graph_c0 | 55.6563405    | 54.7886674    | 54.1343776    | 13.1855897     | 15.3357067     | 22.430475      | 9.188E-49 | -2.77961 | down      | PREDICTED: heat stress transcription factor A-2-like [Nicotiana sylvestris]                        |
| c51156.graph_c0 | 0.1016834     | 0.15267784    | 0.2613344     | 1.18244658     | 1.2344569      | 1.32669179     | 0.0001101 | 1.75819  | up        | PREDICTED: uncharacterized protein At4g26485-like [Sesamum indicum]                                |
| c51164.graph_c0 | 30.5132635    | 29.6111823    | 21.2516288    | 19.552884      | 20.7878896     | 19.7538016     | 3.069E-10 | -1.52359 | down      | PREDICTED: probable WRKY transcription factor 31 [Sesamum indicum]                                 |
| c51165.graph_c0 | 0.2236553     | 0.44775852    | 0.3592574     | 2.31635723     | 1.9813769      | 1.69116768     | 0.0014083 | 1.44385  | up        | -                                                                                                  |
| c51166.graph_c0 | 0.50195686    | 0.25122975    | 0.80629305    | 4.28662741     | 3.87042264     | 3.05131854     | 0.0001562 | 1.74444  | up        | -                                                                                                  |
| c51170.graph_c0 | 2.23454477    | 1.2340868     | 2.2773795     | 43.0654389     | 61.4863578     | 53.0086006     | 2.544E-26 | 3.68456  | up        | PREDICTED: CASP-like protein 1 [Sesamum indicum]                                                   |
| c51171.graph_c0 | 0.10844773    | 0             | 0.27871925    | 2.83749065     | 2.91781969     | 3.15147475     | 8.98E-10  | 3.41374  | up        | SUPERMAN like protein [Arabidopsis thaliana]                                                       |
| c51172.graph_c0 | 75.4740889    | 80.4397044    | 66.5649364    | 33.0889541     | 36.5153839     | 33.5318215     | 5.786E-64 | -2.19813 | down      | PREDICTED: ethylene-responsive transcription factor TINY-like [Sesamum indicum]                    |
| c51176.graph_c0 | 88.2408922    | 86.9624552    | 72.5978651    | 8.68338111     | 8.73631088     | 9.2112385      | 3.72E-138 | -4.3058  | down      | -                                                                                                  |
| c51177.graph_c0 | 0             | 0             | 0             | 26.7548685     | 25.5744404     | 24.9912388     | 2.78E-122 | Inf      | up        | PREDICTED: trans-resveratrol di-O-methyltransferase [Vitis vinifera]                               |
| c51184.graph_c0 | 151.995192    | 113.692556    | 130.928683    | 44.6125733     | 76.4516386     | 70.5782056     | 8.84E-18  | -2.13829 | down      | hypothetical protein CARUB_v10018292mg, partial [Capsella rubella]                                 |
| c51186.graph_c0 | 0.13202674    | 0.26431789    | 0             | 5.08568253     | 5.45828968     | 5.16776938     | 4.072E-11 | 4.23466  | up        | PREDICTED: nucleobase-ascorbate transporter 12 [Sesamum indicum]                                   |
| c51193.graph_c0 | 10.8699855    | 10.4275006    | 9.07943514    | 5.06932248     | 6.06320177     | 4.62001577     | 1.271E-20 | -2.03674 | down      | PREDICTED: cyclin-D3-1 [Sesamum indicum]                                                           |
| c51202.graph_c0 | 0.35552205    | 0.2588204     | 0.49839262    | 3.4060681      | 2.82084758     | 2.85599476     | 4.593E-08 | 1.93235  | up        | PREDICTED: U-box domain-containing protein 9-like [Sesamum indicum]                                |
| c51203.graph_c0 | 0.03031958    | 0.09104983    | 0.03896186    | 18.3340327     | 17.1906015     | 18.1251254     | 1.97E-125 | 7.29717  | up        | PREDICTED: aldehyde dehydrogenase family 3 member F1 [Sesamum indicum]                             |
| c51204.graph_c0 | 34.2745661    | 21.986681     | 22.0220872    | 0              | 0.15839364     | 0              | 6.327E-40 | -10.0447 | down      | histone H3 [Neurospora crassa OR74A]                                                               |

| #ID             | 0 h-1<br>FPKM | 0 h-2<br>FPKM | 0 h-3<br>FPKM | 28 h-1<br>FPKM | 28 h-2<br>FPKM | 28 h-3<br>FPKM | FDR       | log2FC   | regulated | nr_annotation                                                                                       |
|-----------------|---------------|---------------|---------------|----------------|----------------|----------------|-----------|----------|-----------|-----------------------------------------------------------------------------------------------------|
| c51207.graph_c0 | 0.25671103    | 0.32121011    | 0.28864836    | 14.0864954     | 14.6981981     | 13.6068586     | 1.39E-73  | 4.52064  | up        | PREDICTED: argininosuccinate lyase, chloroplastic isoform X1 [Sesamum indicum]                      |
| c51208.graph_c0 | 7.23447398    | 5.26670415    | 7.18372515    | 6.45296808     | 4.85535429     | 5.85063251     | 9.14E-05  | -1.28904 | down      | -                                                                                                   |
| c51209.graph_c0 | 0.75359724    | 0.60348148    | 1.54944366    | 6.62729258     | 6.23108928     | 6.03351442     | 3.398E-06 | 1.5982   | up        | PREDICTED: U11/U12 small nuclear ribonucleoprotein 25 kDa protein-like isoform X1 [Sesamum indicum] |
| c51211.graph_c0 | 3.60094432    | 3.69466387    | 2.89209751    | 110.836115     | 126.127104     | 115.000413     | 5.91E-158 | 4.02259  | up        | PREDICTED: acyl carrier protein 1, chloroplastic-like [Sesamum indicum]                             |
| c51213.graph_c0 | 10.4737729    | 8.15442505    | 6.48036173    | 8.45808641     | 8.27326392     | 9.31733474     | 0.0005199 | -1.03139 | down      | -                                                                                                   |
| c51215.graph_c0 | 24.476775     | 25.8742017    | 22.641187     | 10.8884492     | 11.2851658     | 9.0100249      | 1.363E-48 | -2.31732 | down      | PREDICTED: uncharacterized protein LOC105162031 [Sesamum indicum]                                   |
| c51218.graph_c0 | 0.14491152    | 0.29011326    | 0.37243408    | 2.05375674     | 1.80680235     | 2.01961257     | 0.0001411 | 1.76449  | up        | -                                                                                                   |
| c51221.graph_c0 | 0.32666738    | 0.28612018    | 0.20989026    | 2.78968464     | 3.88541949     | 2.80912496     | 5.517E-09 | 2.44074  | up        | PREDICTED: uncharacterized protein LOC105171540 [Sesamum indicum]                                   |
| c51222.graph_c0 | 4.34024535    | 3.33422134    | 2.98325357    | 0.07335966     | 0              | 0.05986088     | 6.511E-35 | -7.4042  | down      | PREDICTED: transcription factor PAR2-like [Sesamum indicum]                                         |
| c51225.graph_c0 | 11.030075     | 10.4398708    | 7.64839133    | 67.7838817     | 78.5455841     | 72.862975      | 1.033E-40 | 1.82599  | up        | PREDICTED: S-formylglutathione hydrolase [Sesamum indicum]                                          |
| c51231.graph_c0 | 4.90061722    | 4.57848948    | 4.47821308    | 4.07621395     | 4.28789012     | 4.2303554      | 1.068E-07 | -1.23776 | down      | PREDICTED: uncharacterized protein LOC105173527 isoform X1 [Sesamum indicum]                        |
| c51232.graph_c0 | 28.1604181    | 25.2025342    | 24.6870661    | 137.890928     | 141.651048     | 131.624679     | 8.814E-35 | 1.30784  | up        | hypothetical protein MIMGU_mgv1a017591mg [Erythranthe outafata]                                     |
| c51234.graph_c0 | 2.86224339    | 2.75491297    | 3.53663084    | 0.80010077     | 0.50569118     | 0.32643785     | 8.726E-17 | -3.58353 | down      | hypothetical protein MIMGU_mgv1a020559mg [Erythranthe outafata]                                     |
| c51236.graph_c0 | 0             | 0.20413607    | 0.08735351    | 29.54449       | 25.1592142     | 23.7452322     | 5.22E-70  | 6.97528  | up        | hypothetical protein MIMGU_mgv1a014485mg [Erythranthe outafata]                                     |
| c51241.graph_c0 | 8.55215087    | 4.65256226    | 5.2560164     | 0              | 0              | 0              | 2.581E-17 | -Inf     | down      | predicted protein [Hordeum vulgare subsp. vulgare]                                                  |
| c51249.graph_c0 | 4.0475686     | 3.85154154    | 3.66016415    | 15.2535161     | 17.4123685     | 17.8996041     | 3.099E-09 | 1.04008  | up        | PREDICTED: NADP-dependent D-sorbitol-6-phosphate dehydrogenase-like [Sesamum indicum]               |
| c51262.graph_c0 | 0.19147915    | 0.19167088    | 0.16403885    | 2.96887337     | 3.03663338     | 3.19855793     | 4.31E-13  | 2.98392  | up        | hypothetical protein MIMGU_mgv1a00590/mg [Erythranthe outafata]                                     |
| c51265.graph_c0 | 4.01757012    | 4.09340728    | 4.24081941    | 0.99069624     | 1.03574358     | 1.10623164     | 5.159E-21 | -3.07009 | down      | kunitz trypsin inhibitor [Populus tremula]                                                          |
| c51267.graph_c0 | 20.3306598    | 21.6700653    | 20.319991     | 10.1635282     | 10.0943843     | 9.42571807     | 1.16E-109 | -2.16073 | down      | PREDICTED: exocyst complex component EXO70B1-like [Sesamum indicum]                                 |
| c51269.graph_c0 | 0.07245576    | 0.07252831    | 0.09310852    | 2.47504017     | 3.37586754     | 2.06258305     | 1.568E-09 | 3.95881  | up        | PREDICTED: uncharacterized protein LOC102579011 [Solanum tuberosum]                                 |
| c51271.graph_c0 | 91.1880693    | 91.236806     | 93.4053626    | 56.8159433     | 53.9788762     | 58.3174273     | 3.21E-105 | -1.79638 | down      | PREDICTED: alcohol dehydrogenase-like 7 [Sesamum indicum]                                           |
| c51275.graph_c0 | 0.0678191     | 0             | 0             | 5.52053983     | 5.6075961      | 4.94714283     | 4.017E-20 | 6.82948  | up        | PREDICTED: homeobox-leucine zipper protein ATHB-52 [Sesamum indicum]                                |
| c51276.graph_c0 | 12.4014537    | 12.0828352    | 11.6866632    | 9.85454684     | 12.9125621     | 11.6695895     | 3.594E-06 | -1.16084 | down      | PREDICTED: uncharacterized protein LOC103541453 [Prunus mume]                                       |
| c51277.graph_c0 | 0             | 0             | 0             | 1.13755732     | 1.45783015     | 1.04801006     | 4.657E-12 | Inf      | up        | PREDICTED: formin-like protein 6 [Sesamum indicum]                                                  |
| c51279.graph_c0 | 0             | 0.04741835    | 0             | 4.3036132      | 4.22770603     | 3.51171323     | 3.389E-21 | 6.90599  | up        | hypothetical protein MIMGU_mgv1a008158mg [Erythranthe outafata]                                     |

| #ID             | 0 h-1<br>FPKM | 0 h-2<br>FPKM | 0 h-3<br>FPKM | 28 h-1<br>FPKM | 28 h-2<br>FPKM | 28 h-3<br>FPKM | FDR       | log2FC   | regulated | nr_annotation                                                                      |
|-----------------|---------------|---------------|---------------|----------------|----------------|----------------|-----------|----------|-----------|------------------------------------------------------------------------------------|
| c51281.graph_c0 | 3.86986257    | 2.55314527    | 2.42995278    | 13.2319754     | 16.2759409     | 13.1704779     | 3.372E-07 | 1.18322  | up        | PREDICTED: protein TRANSPARENT TESTA GLABRA 1 [Sesamum indicum]                    |
| c51282.graph_c0 | 6.09062293    | 6.61754724    | 6.37147759    | 6.91799909     | 5.64376714     | 6.26217239     | 9.526E-14 | -1.11019 | down      | PREDICTED: scarecrow-like protein 15 [Sesamum indicum]                             |
| c51286.graph_c0 | 10.8798077    | 11.261593     | 8.70024062    | 62.3777343     | 63.7482231     | 60.8878933     | 3.694E-57 | 1.51241  | up        | hypothetical protein JCGZ_13359 [Jatropha curcas]                                  |
| c51305.graph_c0 | 0.76571954    | 0.447117      | 0.49198996    | 3.94202055     | 4.81548965     | 4.35194714     | 4.358E-06 | 1.85695  | up        | PREDICTED: uncharacterized protein LOC105156993 [Sesamum indicum]                  |
| c51306.graph_c0 | 13.2999157    | 8.90609417    | 8.13291971    | 3.33320761     | 3.25033987     | 2.23029356     | 4.82E-10  | -2.87002 | down      | PREDICTED: uncharacterized protein LOC105166496 [Sesamum indicum]                  |
| c51308.graph_c0 | 2.43760221    | 2.40131225    | 1.54134723    | 63.6945049     | 65.2035789     | 64.4571815     | 3.98E-204 | 3.83653  | up        | PREDICTED: adenosine kinase 2-like [Sesamum indicum]                               |
| c51311.graph_c0 | 0.54382398    | 0.54436854    | 0.51493131    | 6.36557526     | 7.06230924     | 6.84080309     | 4.711E-23 | 2.57047  | up        | PREDICTED: pentatricopeptide repeat-containing protein At1g02150 [Sesamum indicum] |
| c51312.graph_c0 | 9.49344487    | 5.9551827     | 6.01839657    | 0              | 0              | 0              | 9.463E-27 | -Inf     | down      | 60s ribosomal protein L21-a, putative [Candida maltosa Xu316]                      |
| c51323.graph_c0 | 0.02973189    | 0.17856999    | 0.07641332    | 1.14527536     | 1.03407627     | 1.02269905     | 1.918E-06 | 2.39869  | up        | PREDICTED: uncharacterized protein LOC105175605 isoform X2 [Sesamum indicum]       |
| c51328.graph_c0 | 2.9678455     | 3.34216952    | 3.21789288    | 25.7493428     | 24.2230325     | 29.7017719     | 6.462E-20 | 1.97353  | up        | -                                                                                  |
| c51331.graph_c0 | 0.88235673    | 1.76648056    | 1.700795      | 26.6136092     | 30.2541271     | 26.5569097     | 2.082E-31 | 3.16477  | up        | --                                                                                 |
| c51334.graph_c0 | 23.8753218    | 23.1104759    | 22.58021      | 9.73569593     | 10.5743589     | 10.3508883     | 6.09E-101 | -2.27186 | down      | PREDICTED: GATA transcription factor 8-like [Sesamum indicum]                      |
| c51335.graph_c0 | 0.84250178    | 0.73792724    | 0.13533102    | 41.1023451     | 49.343867      | 42.095728      | 6.718E-74 | 5.19651  | up        | PREDICTED: uncharacterized protein LOC105168965 [Sesamum indicum]                  |
| c51336.graph_c0 | 3.1215495     | 3.29132461    | 2.6742098     | 2.51072143     | 3.46870058     | 2.54239763     | 1.627E-06 | -1.18212 | down      | -                                                                                  |
| c51337.graph_c0 | 0.04182974    | 0.08374325    | 0             | 1.1856629      | 0.96074321     | 1.3892182      | 5.662E-10 | 3.74271  | up        | PREDICTED: cell division control protein 2 homolog D [Sesamum indicum]             |
| c51339.graph_c0 | 1.84451312    | 1.92663664    | 2.09545819    | 8.7040654      | 8.73607048     | 9.2902534      | 3.979E-10 | 1.09604  | up        | PREDICTED: uncharacterized protein LOC105161977 [Sesamum indicum]                  |
| c51341.graph_c0 | 5.90274641    | 7.72670547    | 5.39720625    | 0.7425142      | 1.04287666     | 1.14445044     | 4.565E-24 | -3.7868  | down      | PREDICTED: putative calcium-binding protein CML23 [Sesamum indicum]                |
| c51343.graph_c0 | 14.9802184    | 18.2611564    | 15.9591604    | 12.3664055     | 11.2347709     | 12.129869      | 5.623E-22 | -1.55204 | down      | PREDICTED: T-box/keich-repeat protein SKIP50 [Sesamum indicum]                     |
| c51348.graph_c0 | 0.07858398    | 0.07866267    | 0.05049176    | 2.77004748     | 3.71296304     | 3.30894567     | 5.33E-17  | 4.47349  | up        | PREDICTED: BTB/POZ domain-containing protein At1g63850-like [Sesamum indicum]      |
| c51349.graph_c0 | 2.93372511    | 4.01859119    | 4.56362721    | 0.44888726     | 0.10132578     | 0.18314417     | 1.636E-18 | -5.06888 | down      | -                                                                                  |
| c51352.graph_c0 | 3.09124341    | 0.92830165    | 1.19171105    | 9.43613115     | 7.70851868     | 8.79977824     | 0.0091593 | 1.23649  | up        | -                                                                                  |
| c51356.graph_c0 | 1.5981637     | 1.59976402    | 0.55505504    | 13.1536123     | 13.5771677     | 13.0899421     | 8.012E-25 | 2.32794  | up        | PREDICTED: A-kinase anchor protein 17B [Sesamum indicum]                           |
| c51358.graph_c0 | 10.4842046    | 8.3514185     | 10.1519022    | 59.1880631     | 63.1314387     | 63.4472516     | 1.935E-38 | 1.58937  | up        | PREDICTED: 50S ribosomal protein HLP, mitochondrial [Sesamum indicum]              |

| #ID             | 0 h-1<br>FPKM | 0 h-2<br>FPKM | 0 h-3<br>FPKM | 28 h-1<br>FPKM | 28 h-2<br>FPKM | 28 h-3<br>FPKM | FDR       | log2FC   | regulated | nr_annotation                                                                              |
|-----------------|---------------|---------------|---------------|----------------|----------------|----------------|-----------|----------|-----------|--------------------------------------------------------------------------------------------|
| c51363.graph_c0 | 6.98448335    | 7.28898692    | 10.5030547    | 0.75604204     | 0.29255789     | 0.79318816     | 1.384E-16 | -4.84314 | down      | -                                                                                          |
| c51366.graph_c0 | 0.80679455    | 0.48456146    | 0.31102888    | 147.41433      | 130.348228     | 129.714868     | 2.9E-208  | 6.91028  | up        | PREDICTED: putative invertase inhibitor [Sesamum indicum]                                  |
| c51369.graph_c0 | 0.87150579    | 1.96285155    | 1.3998993     | 6.9674592      | 9.00751434     | 9.17415174     | 0.0008639 | 1.47751  | up        | -                                                                                          |
| c51370.graph_c0 | 4.26194463    | 2.34641678    | 3.55989893    | 91.0681697     | 105.019966     | 94.152394      | 1.73E-64  | 3.74534  | up        | putative plasma membrane intrinsic protein PIP family member 2 aquaporin [Cedrela odorata] |
| c51372.graph_c0 | 0.08081761    | 0             | 0             | 5.13955486     | 6.12550773     | 5.77550964     | 2.304E-31 | 6.66116  | up        | PREDICTED: 2-alkenal reductase (NADP(+)-dependent) isoform X1 [Sesamum indicum]            |
| c51373.graph_c0 | 6.53177224    | 6.30480165    | 8.54347139    | 3.68759941     | 4.36286717     | 4.42710953     | 1.347E-08 | -1.87103 | down      | PREDICTED: F-box protein At5g52880 [Sesamum indicum]                                       |
| c51375.graph_c0 | 71.8959022    | 72.6455589    | 71.3362017    | 321.492041     | 343.854499     | 342.713581     | 3.095E-40 | 1.13296  | up        | hypothetical protein MIMGU_mgv1a015154mg [Erythranthe guttata]                             |
| c51377.graph_c0 | 9.39448121    | 6.12677575    | 5.85322681    | 0              | 0              | 0              | 4.57E-27  | -Inf     | down      | unknown [Lotus japonicus]                                                                  |
| c51379.graph_c0 | 90.0258061    | 92.7453312    | 87.5782263    | 61.1607839     | 61.8353579     | 66.2212628     | 1.128E-84 | -1.60453 | down      | PREDICTED: glutelin type-B 5 [Sesamum indicum]                                             |
| c51380.graph_c0 | 24.7052913    | 25.7848653    | 23.3716134    | 25.0471576     | 26.1240539     | 26.7109519     | 2.001E-26 | -1.01306 | down      | PREDICTED: protein YLS9 [Sesamum indicum]                                                  |
| c51381.graph_c0 | 4.40598105    | 2.3816122     | 3.96330206    | 0              | 0              | 0              | 2.475E-20 | -Inf     | down      | --                                                                                         |
| c51384.graph_c0 | 0.8088742     | 0.64099996    | 0.77957653    | 7.17709731     | 9.22273912     | 7.43549638     | 1.606E-20 | 2.32696  | up        | PREDICTED: afadin- and alpha-actinin-binding protein [Sesamum indicum]                     |
| c51386.graph_c0 | 0.20327992    | 0.5087087     | 0.13061138    | 4.80163703     | 5.00241697     | 4.94282957     | 5.638E-09 | 3.04556  | up        | -                                                                                          |
| c51391.graph_c0 | 5.89714488    | 4.83312217    | 5.35200816    | 4.01813523     | 3.45869274     | 4.45912112     | 2.662E-16 | -1.51893 | down      | hypothetical protein MIMGU_mgv1a026169mg, partial [Erythranthe guttata]                    |
| c51392.graph_c0 | 0             | 0.07816369    | 0             | 5.56170519     | 4.76548923     | 5.32556319     | 7.433E-18 | 6.56432  | up        | PREDICTED: 21 kDa protein-like [Sesamum indicum]                                           |
| c51395.graph_c0 | 50.7126173    | 58.1688823    | 51.3674977    | 33.4754077     | 29.5987264     | 31.4200848     | 7.628E-52 | -1.85223 | down      | PREDICTED: E3 ubiquitin-protein ligase KIMG1-like [Sesamum indicum]                        |
| c51396.graph_c0 | 0.03725766    | 0             | 0.04787756    | 1.1914606      | 1.27137306     | 1.36994935     | 1.999E-11 | 4.39355  | up        | -                                                                                          |
| c51398.graph_c0 | 3.19502962    | 2.23132253    | 1.43223473    | 1.83610209     | 1.80410698     | 1.71857436     | 0.0051533 | -1.4377  | down      | hypothetical protein JCGZ_03974 [Jatropha curcas]                                          |
| c51401.graph_c0 | 8.24779118    | 7.43630044    | 7.66717233    | 1.8280938      | 1.34350943     | 2.28960079     | 3.279E-45 | -3.18397 | down      | PREDICTED: uncharacterized protein LOC105157495 [Sesamum indicum]                          |
| c51405.graph_c0 | 4.32583663    | 4.54667672    | 3.61326637    | 25.623544      | 27.29913       | 26.7236742     | 5.558E-18 | 1.58521  | up        | PREDICTED: DEAD-box ATP-dependent RNA helicase 31-like [Sesamum indicum]                   |
| c51408.graph_c0 | 2.3589027     | 2.95158098    | 3.03128336    | 18.5730663     | 19.3496971     | 17.0207591     | 2.396E-06 | 1.62582  | up        | hypothetical protein POPTR_0013s01180g [Populus trichocarpa]                               |
| c51409.graph_c0 | 5.61440049    | 4.29766423    | 5.80007457    | 0.32004031     | 0.36120799     | 0              | 6.037E-36 | -5.62671 | down      | -                                                                                          |
| c51417.graph_c0 | 3.20253016    | 3.20573701    | 3.35492776    | 14.420879      | 15.0537585     | 14.8226937     | 2.968E-12 | 1.09061  | up        | PREDICTED: ubiquitin receptor RAD23c-like [Sesamum indicum]                                |
| c51420.graph_c0 | 2.53872621    | 2.80877029    | 2.40384693    | 1.89368767     | 2.01671362     | 1.78296193     | 3.627E-06 | -1.5352  | down      | PREDICTED: embryonic protein DC-8-like isoform X2 [Sesamum indicum]                        |
| c51422.graph_c0 | 2.01278187    | 1.67899781    | 1.2932522     | 10.3620544     | 12.1077175     | 10.8427452     | 3.93E-05  | 1.65474  | up        | PREDICTED: GTP-binding protein OBGC, chloroplast [Sesamum indicum]                         |



| #ID             | 0 h-1<br>FPKM | 0 h-2<br>FPKM | 0 h-3<br>FPKM | 28 h-1<br>FPKM | 28 h-2<br>FPKM | 28 h-3<br>FPKM | FDR       | log2FC   | regulated | nr_annotation                                                                                           |
|-----------------|---------------|---------------|---------------|----------------|----------------|----------------|-----------|----------|-----------|---------------------------------------------------------------------------------------------------------|
| c51426.graph_c0 | 1.28685488    | 1.23556619    | 1.28242979    | 6.9477847      | 7.85873177     | 6.97764379     | 2.369E-12 | 1.42635  | up        | hypothetical protein MIMGU_mgv1a026964mg, partial [Erythranthe guttata]                                 |
| c51429.graph_c0 | 0.28261084    | 0.14144692    | 0.54474918    | 2.97829898     | 3.15276693     | 3.77110497     | 2.216E-06 | 2.25178  | up        | -                                                                                                       |
| c51440.graph_c0 | 17.8315849    | 19.7384743    | 16.6784376    | 12.5960085     | 12.7377764     | 12.1054827     | 1.231E-49 | -1.62464 | down      | hypothetical protein MIMGU_mgv1a026899mg [Erythranthe guttata]                                          |
| c51441.graph_c0 | 9.47979429    | 10.3422565    | 10.5394061    | 5.41899089     | 9.57598822     | 6.2221779      | 4.449E-17 | -1.61011 | down      | PREDICTED: phospholipid hydroperoxide glutathione peroxidase 1, chloroplastic-like [Sesamum indicum]    |
| c51444.graph_c0 | 1.33021638    | 1.22502452    | 1.09400366    | 0.73476314     | 0.38408655     | 0.63111655     | 4.999E-08 | -2.14734 | down      | -                                                                                                       |
| c51446.graph_c0 | 1.66639466    | 1.40117318    | 1.45614052    | 8.91388764     | 7.87343946     | 8.02474393     | 4.508E-06 | 1.36616  | up        | PREDICTED: phospholipase D delta [Sesamum indicum]                                                      |
| c51448.graph_c0 | 0             | 0.10205227    | 0             | 1.25964564     | 1.27114685     | 1.66271561     | 2.704E-11 | 4.28047  | up        | PREDICTED: uncharacterized protein LOC105162545 [Sesamum indicum]                                       |
| c51455.graph_c0 | 0.15920705    | 0.07968323    | 0.30688104    | 1.64887838     | 1.85444848     | 1.69954269     | 2.152E-06 | 2.15003  | up        | PREDICTED: uncharacterized protein LOC105171871 [Sesamum indicum]                                       |
| c51460.graph_c0 | 0             | 0             | 0             | 20.1402292     | 26.6071439     | 24.73789       | 1.225E-48 | Inf      | up        | PREDICTED: MLP-like protein 423 [Sesamum indicum]                                                       |
| c51462.graph_c0 | 18.6289537    | 10.3317827    | 17.4689584    | 11.7097654     | 12.2248234     | 12.0931391     | 0.0010799 | -1.45706 | down      | -                                                                                                       |
| c51463.graph_c0 | 47.6161678    | 37.0281134    | 40.8345815    | 12.1554061     | 16.2045483     | 12.602599      | 7.821E-37 | -2.70502 | down      | PREDICTED: uncharacterized protein LOC105175709 [Sesamum indicum]                                       |
| c51466.graph_c0 | 125.48772     | 128.249015    | 126.701684    | 29.926231      | 31.9835445     | 41.0315058     | 0         | -2.9751  | down      | PREDICTED: zinc-finger homeodomain protein 6 [Sesamum indicum]                                          |
| c51468.graph_c0 | 9.40967601    | 14.971409     | 11.3281132    | 4.6072578      | 5.45989739     | 5.11054957     | 1.681E-08 | -2.32575 | down      | PREDICTED: oleosin 1-like [Solanum lycopersicum]                                                        |
| c51470.graph_c0 | 0.73263557    | 0.1833423     | 0.11768321    | 6.32314428     | 8.11308282     | 8.0381668      | 5.541E-13 | 3.37153  | up        | PREDICTED: probable stress-associated endoplasmic reticulum protein [Musa acuminata subsp. malaccensis] |
| c51473.graph_c0 | 0             | 0.29656079    | 0             | 1.79435883     | 1.84695708     | 1.52274944     | 5.626E-08 | 3.03958  | up        | PREDICTED: DNA replication complex GINS protein PSF2 [Sesamum indicum]                                  |
| c51477.graph_c0 | 5.36844353    | 3.72503377    | 4.15487627    | 0              | 0              | 0              | 2.549E-50 | -Inf     | down      | RecName: Full=60S ribosomal protein L5 [Helianthus annuus]                                              |
| c51480.graph_c0 | 0.92155709    | 0.46123994    | 0.78949156    | 42.6428114     | 38.7040442     | 34.1585595     | 1.146E-43 | 4.6419   | up        | PREDICTED: uncharacterized protein LOC105179276 [Sesamum indicum]                                       |
| c51483.graph_c0 | 0.29925074    | 0.25675748    | 0.32961346    | 4.90914373     | 5.0216258      | 5.14671964     | 1.896E-15 | 2.99736  | up        | PREDICTED: UPTUSS protein-like isoform X1 [Sesamum indicum]                                             |
| c51484.graph_c0 | 6.07423294    | 6.8861403     | 5.4545365     | 27.1265774     | 25.9335064     | 28.2547602     | 5.306E-10 | 1.05418  | up        | PREDICTED: multiple C2 and transmembrane domain-containing protein 1-like [Sesamum indicum]             |
| c51490.graph_c0 | 7.48351737    | 9.56683331    | 7.18349637    | 0.26211939     | 0.05916731     | 0.2673591      | 6.638E-55 | -6.44922 | down      | unnamed protein product [Coffea canephora]                                                              |
| c51492.graph_c0 | 2.56160418    | 3.05518038    | 3.43183781    | 12.1608524     | 15.7369648     | 12.444349      | 1.197E-06 | 1.06181  | up        | hypothetical protein MIMGU_mgv1a000973mg [Erythranthe guttata]                                          |
| c51494.graph_c0 | 0.57979126    | 0.49746157    | 0.69183653    | 2.16714314     | 3.12532795     | 2.79992091     | 0.002438  | 1.10001  | up        | PREDICTED: uncharacterized protein LOC105164785 isoform X2 [Sesamum indicum]                            |
| c51496.graph_c0 | 0.12853312    | 0.64330914    | 0.3303403     | 2.98934824     | 3.96430487     | 3.12533231     | 1.677E-05 | 2.09838  | up        | -                                                                                                       |

| #ID             | 0 h-1<br>FPKM | 0 h-2<br>FPKM | 0 h-3<br>FPKM | 28 h-1<br>FPKM | 28 h-2<br>FPKM | 28 h-3<br>FPKM | FDR       | log2FC   | regulated | nr_annotation                                                                                      |
|-----------------|---------------|---------------|---------------|----------------|----------------|----------------|-----------|----------|-----------|----------------------------------------------------------------------------------------------------|
| c51497.graph_c0 | 1.75802705    | 1.83311193    | 2.02380787    | 8.33182479     | 8.868799       | 7.99336091     | 3.186E-07 | 1.073    | up        | PREDICTED: uncharacterized protein LOC105176842 [Sesamum indicum]                                  |
| c51499.graph_c0 | 19.6961322    | 19.1282963    | 19.737013     | 84.6577918     | 91.8668932     | 88.8835349     | 9.345E-39 | 1.08949  | up        | hypothetical protein MIMGU_mgv1a004619mg [Erythranthe diffusa]                                     |
| c51500.graph_c0 | 0.43468377    | 0.87023808    | 0.44686869    | 7.26629018     | 6.2755275      | 4.74338676     | 7.674E-08 | 2.2937   | up        | PREDICTED: BRI1 kinase inhibitor 1 [Sesamum indicum]                                               |
| c51503.graph_c0 | 3.19921874    | 2.04955025    | 2.13778382    | 9.48670886     | 14.3599909     | 11.156258      | 0.0006842 | 1.15766  | up        | PREDICTED: protein ENHANCED DISEASE RESISTANCE 2 [Sesamum indicum]                                 |
| c51505.graph_c0 | 115.068372    | 134.938921    | 178.601483    | 83.7525859     | 55.0966731     | 79.7481954     | 3.714E-06 | -2.06643 | down      | hypothetical protein M569_00222, partial [Genlisea aurea]                                          |
| c51511.graph_c0 | 4.18386607    | 4.34316875    | 4.11529481    | 19.2209209     | 19.7274008     | 20.0033725     | 1.36E-11  | 1.13116  | up        | PREDICTED: protein FLUORESCENT IN BLUE LIGHT, chloroplastic [Sesamum indicum]                      |
| c51514.graph_c0 | 0.40461607    | 0.25313827    | 0.25997384    | 7.13126127     | 7.00309034     | 7.10884061     | 3.342E-20 | 3.44716  | up        | PREDICTED: cyclin-D3-3-like [Sesamum indicum]                                                      |
| c51516.graph_c0 | 12.2523612    | 6.67875898    | 8.41799546    | 0              | 0              | 0              | 7.679E-24 | -Inf     | down      | predicted protein [Physcomitrella patens]                                                          |
| c51518.graph_c0 | 0             | 0.07172588    | 0             | 5.05154749     | 4.70213789     | 6.16178472     | 2.92E-19  | 6.71328  | up        | PREDICTED: uncharacterized protein LOC105177191 [Sesamum indicum]                                  |
| c51521.graph_c0 | 6.02716485    | 5.64604292    | 5.38432572    | 29.7968291     | 31.2607957     | 31.5775764     | 1.913E-32 | 1.35204  | up        | PREDICTED: methylthioribose kinase [Sesamum indicum]                                               |
| c51523.graph_c0 | 0.78529933    | 0.42877401    | 0.5504404     | 5.08487278     | 4.96595221     | 5.33470456     | 4.884E-07 | 2.03755  | up        | -                                                                                                  |
| c51525.graph_c0 | 25.800674     | 30.1971495    | 22.494316     | 19.3864568     | 31.387655      | 24.7174851     | 1.04E-06  | -1.14515 | down      | PREDICTED: E3 ubiquitin-protein ligase ATL51-like [Sesamum indicum]                                |
| c51527.graph_c0 | 0             | 0             | 0.27893722    | 11.0433154     | 15.6688375     | 12.7444895     | 9.087E-17 | 6.01347  | up        | -                                                                                                  |
| c51533.graph_c0 | 16.9552304    | 16.2521754    | 15.7138724    | 1.12026943     | 1.01149826     | 0.97507276     | 2.77E-182 | -5.06693 | down      | PREDICTED: uncharacterized protein LOC105155796 [Sesamum indicum]                                  |
| c51534.graph_c0 | 434.593424    | 445.102392    | 438.608057    | 56.7431607     | 64.2333631     | 63.6416298     | 0         | -3.92653 | down      | PREDICTED: zinc finger A20 and AN1 domain-containing stress-associated protein 5 [Sesamum indicum] |
| c51535.graph_c0 | 32.2664208    | 19.5524884    | 19.3814661    | 0              | 0              | 0              | 8.071E-31 | -Inf     | down      | -                                                                                                  |
| c51537.graph_c0 | 134.719924    | 125.495728    | 131.122502    | 124.486464     | 127.747636     | 132.035712     | 1.335E-41 | -1.11649 | down      | PREDICTED: anthocyanidin 3-O-glucosyltransferase 5-like [Sesamum indicum]                          |
| c51538.graph_c0 | 0.4549434     | 1.02464765    | 0.73077535    | 4.13312801     | 4.40355595     | 2.83298291     | 0.0051504 | 1.26767  | up        | PREDICTED: uncharacterized protein LOC105159330 [Sesamum indicum]                                  |
| c51540.graph_c0 | 857.850664    | 933.26925     | 780.863924    | 154.887004     | 166.220161     | 157.959565     | 2.55E-131 | -3.51381 | down      | Polyubiquitin-A [Triticum urartu]                                                                  |
| c51544.graph_c0 | 0.58553734    | 0.41028657    | 0.82768253    | 3.48963435     | 5.18731348     | 4.82688202     | 1.341E-06 | 1.79204  | up        | PREDICTED: polyol transporter 5-like [Sesamum indicum]                                             |
| c51547.graph_c0 | 0.47543626    | 0             | 1.22190884    | 12.0940517     | 10.6078006     | 12.9702224     | 3.662E-09 | 3.28365  | up        | -                                                                                                  |
| c51554.graph_c0 | 6.41493548    | 7.18000064    | 6.46953995    | 2.67543454     | 3.71231109     | 3.88469208     | 3.196E-42 | -2.05549 | down      | PREDICTED: 3-ketoacyl-CoA synthase 1 [Sesamum indicum]                                             |
| c51558.graph_c0 | 4.28800689    | 5.74095216    | 1.99746875    | 50.7989287     | 74.4981646     | 74.9560299     | 5.36E-14  | 2.97631  | up        | PREDICTED: blue copper protein-like [Sesamum indicum]                                              |
| c51564.graph_c0 | 0.07018735    | 0.21077289    | 0             | 1.63237629     | 1.88841226     | 1.3736309      | 1.604E-07 | 3.04541  | up        | PREDICTED: uncharacterized protein LOC105170763 isoform X2 [Sesamum indicum]                       |

| #ID             | 0 h-1<br>FPKM | 0 h-2<br>FPKM | 0 h-3<br>FPKM | 28 h-1<br>FPKM | 28 h-2<br>FPKM | 28 h-3<br>FPKM | FDR       | log2FC   | regulated | nr_annotation                                                                                     |
|-----------------|---------------|---------------|---------------|----------------|----------------|----------------|-----------|----------|-----------|---------------------------------------------------------------------------------------------------|
| c51565.graph_c1 | 11.2072158    | 15.3643826    | 12.2101505    | 8.05680354     | 5.99549852     | 7.5857145      | 1.834E-12 | -1.93182 | down      | PREDICTED: floral homeotic protein APETALA 2-like isoform X2 [Sesamum indicum]                    |
| c51566.graph_c0 | 2.87210383    | 3.13372799    | 2.17755261    | 26.8025821     | 27.1215846     | 26.7081301     | 6.112E-66 | 2.21368  | up        | PREDICTED: ankyrin repeat-containing protein At2g01680 [Sesamum indicum]                          |
| c51569.graph_c0 | 5.84030455    | 5.84615273    | 6.54284019    | 4.35353814     | 5.99452606     | 4.88462091     | 4.121E-08 | -1.35175 | down      | PREDICTED: uncharacterized protein LOC105171557 [Sesamum indicum]                                 |
| c51570.graph_c0 | 2.12078345    | 1.93559176    | 2.32451266    | 1.49603869     | 1.14611863     | 1.47970345     | 1.478E-06 | -1.72176 | down      | PREDICTED: uncharacterized protein LOC105175073 [Sesamum indicum]                                 |
| c51573.graph_c0 | 34.7559086    | 35.4565623    | 35.9011326    | 15.7122068     | 14.0775215     | 14.1031357     | 1.37E-45  | -2.36463 | down      | -                                                                                                 |
| c51574.graph_c0 | 3.72890961    | 4.08477973    | 4.88220773    | 1.38064246     | 1.15425064     | 1.37694696     | 8.829E-19 | -2.79183 | down      | hypothetical protein JCGZ_21459 [Jatropha curcas]                                                 |
| c51578.graph_c0 | 0.40585215    | 0.10156464    | 0.13038402    | 3.02345278     | 4.72737808     | 3.00867412     | 3.047E-06 | 2.9974   | up        | hypothetical protein CICLE_v10033008mg [Citrus clementina]                                        |
| c51579.graph_c0 | 6.82941825    | 4.91730758    | 5.38881665    | 0.17416077     | 0.31450168     | 0.28422753     | 8.761E-36 | -5.55849 | down      | -                                                                                                 |
| c51582.graph_c0 | 13.0688342    | 12.9828152    | 11.8321148    | 0              | 0.03248531     | 0.4403738      | 1.09E-190 | -7.4006  | down      | PREDICTED: LOW QUALITY PROTEIN: EID1-like F-box protein 3 [Sesamum indicum]                       |
| c51588.graph_c0 | 2.25541527    | 2.33552455    | 3.39800446    | 2.82624624     | 2.14354171     | 2.67518487     | 0.0037283 | -1.15909 | down      | -                                                                                                 |
| c51592.graph_c0 | 8.02379469    | 6.34447021    | 6.41181635    | 2.45027216     | 4.07075348     | 3.51894765     | 3.648E-20 | -2.13766 | down      | PREDICTED: glutaredoxin-C9-like [Sesamum indicum]                                                 |
| c51596.graph_c0 | 0.62892811    | 0.45786028    | 0.44083501    | 2.86727196     | 2.25119804     | 2.61093665     | 0.0036764 | 1.25279  | up        | hypothetical protein MIMGU_mgv1a007994mg [Erythranthe guttata]                                    |
| c51597.graph_c0 | 11.9019547    | 10.1736441    | 11.3419761    | 3.86346421     | 3.35671025     | 3.80685916     | 1.362E-80 | -2.68951 | down      | PREDICTED: pentatricopeptide repeat-containing protein At3g26630, chloroplastic [Sesamum indicum] |
| c51601.graph_c0 | 0.26610555    | 0.33901893    | 0.18652155    | 4.1493945      | 3.74651419     | 3.67281034     | 1.02E-17  | 2.78329  | up        | PREDICTED: uncharacterized protein LOC105171071 [Sesamum indicum]                                 |
| c51602.graph_c0 | 8.66082409    | 10.8368707    | 9.37221208    | 5.71486783     | 8.15128828     | 5.60945935     | 1.104E-11 | -1.66009 | down      | -                                                                                                 |
| c51603.graph_c0 | 0.32182691    | 0.08053729    | 0.20678016    | 1.57883813     | 2.2703089      | 1.67004317     | 1.415E-05 | 2.09213  | up        | hypothetical protein MIMGU_mgv1a020884mg [Erythranthe guttata]                                    |
| c51610.graph_c0 | 30.121116     | 13.0104829    | 18.0278371    | 0              | 0              | 0              | 1.851E-15 | -Inf     | down      | -                                                                                                 |
| c51619.graph_c0 | 0             | 0             | 0             | 2.60286824     | 2.9067595      | 3.4653419      | 2.556E-14 | Inf      | up        | hypothetical protein MIMGU_mgv1a023502mg, partial [Erythranthe guttata]                           |
| c51620.graph_c0 | 67.9826049    | 59.5785063    | 75.0807732    | 51.459821      | 53.2716543     | 50.1406779     | 2.85E-13  | -1.48042 | down      | PREDICTED: ethylene-responsive transcription factor ERF069-like [Sesamum indicum]                 |
| c51622.graph_c0 | 25.9222439    | 26.1828141    | 25.1791028    | 182.541513     | 188.626947     | 193.988379     | 1.37E-102 | 1.78046  | up        | PREDICTED: 40S ribosomal protein SA-like [Sesamum indicum]                                        |
| c51629.graph_c0 | 51.9814082    | 43.846862     | 53.7947909    | 25.6902557     | 27.7441064     | 35.0206062     | 2.763E-19 | -1.84855 | down      | -                                                                                                 |
| c51630.graph_c0 | 4.10138072    | 2.86821739    | 3.3932948     | 1.14334351     | 1.32728399     | 1.49939834     | 2.138E-16 | -2.47223 | down      | hypothetical protein MIMGU_mgv1a010566mg [Erythranthe guttata]                                    |
| c51632.graph_c0 | 0.19285497    | 0.38609617    | 0.86739194    | 170.371627     | 171.990484     | 162.297008     | 0         | 7.3385   | up        | PREDICTED: non-specific lipid-transfer protein 2-like [Sesamum indicum]                           |
| c51638.graph_c0 | 0.06877941    | 0             | 0             | 2.64938933     | 1.85053126     | 2.48820158     | 1.27E-12  | 5.6087   | up        | -                                                                                                 |

| #ID             | 0 h-1<br>FPKM | 0 h-2<br>FPKM | 0 h-3<br>FPKM | 28 h-1<br>FPKM | 28 h-2<br>FPKM | 28 h-3<br>FPKM | FDR       | log2FC   | regulated | nr_annotation                                                                            |
|-----------------|---------------|---------------|---------------|----------------|----------------|----------------|-----------|----------|-----------|------------------------------------------------------------------------------------------|
| c51644.graph_c0 | 1.59097771    | 1.20815718    | 1.90347146    | 8.73216003     | 9.3963835      | 8.97991996     | 2.822E-08 | 1.43316  | up        | -                                                                                        |
| c51645.graph_c0 | 56.3960131    | 62.0483583    | 55.7795129    | 47.3217659     | 49.8483041     | 47.5851444     | 6.841E-30 | -1.35759 | down      | PREDICTED: uncharacterized protein LOC105177839 [Sesamum indicum]                        |
| c51648.graph_c0 | 0.67447312    | 0.311607      | 0.20001338    | 2.22476826     | 2.79183196     | 2.18462515     | 0.0007513 | 1.52403  | up        | hypothetical protein MIMGU_mgv1a011849mg [Erythranthe <small>cutifolia</small> ]         |
| c51653.graph_c0 | 0             | 0             | 0             | 2.69129297     | 4.0220445      | 2.42325306     | 1.486E-09 | Inf      | up        | -                                                                                        |
| c51657.graph_c0 | 3.41874635    | 2.85180809    | 4.2467836     | 0.49694503     | 0.74782461     | 0.74342232     | 4.236E-15 | -3.49689 | down      | -                                                                                        |
| c51658.graph_c0 | 49.7268238    | 55.1871197    | 51.3985801    | 6.54731322     | 5.20221677     | 6.51791603     | 3.27E-135 | -4.18705 | down      | hypothetical protein MIMGU_mgv1a00588/mg [Erythranthe <small>cutifolia</small> ]         |
| c51660.graph_c0 | 0.35354746    | 0.17695074    | 0.68148372    | 11.2418362     | 10.6143389     | 10.3264547     | 1.625E-19 | 3.62797  | up        | PREDICTED: nudix hydrolase 1 [Sesamum indicum]                                           |
| c51665.graph_c0 | 5.18143695    | 3.30870929    | 2.64038082    | 19.8680446     | 19.4632086     | 19.5499602     | 1.455E-08 | 1.32043  | up        | PREDICTED: uncharacterized protein LOC104227211 [Nicotiana sylvestris]                   |
| c51668.graph_c0 | 77.04052      | 83.0838721    | 72.3068655    | 53.0117663     | 54.8739609     | 54.7014193     | 3.728E-75 | -1.60506 | down      | hypothetical protein MIMGU_mgv1a005995mg [Erythranthe <small>cutifolia</small> ]         |
| c51669.graph_c0 | 2.44309736    | 2.90408321    | 4.218672      | 20.7526649     | 16.8338791     | 16.9792832     | 5.864E-09 | 1.41419  | up        | PREDICTED: probable calcium-binding protein CML13 [Sesamum indicum]                      |
| c51672.graph_c0 | 29.5589602    | 16.8348698    | 21.7755592    | 0              | 0              | 0              | 6.107E-34 | -Inf     | down      | --                                                                                       |
| c51676.graph_c0 | 158.237019    | 168.590537    | 155.25803     | 12.0724272     | 14.8587889     | 15.2949768     | 0         | -4.60275 | down      | hypothetical protein MIMGU_mgv1a00946/mg [Erythranthe <small>cutifolia</small> ]         |
| c51680.graph_c0 | 6.24373048    | 5.87684934    | 5.98764244    | 58.3832256     | 58.7076515     | 52.11687       | 7.292E-44 | 2.13336  | up        | PREDICTED: cytochrome b-c1 complex subunit 6 [Sesamum indicum]                           |
| c51684.graph_c0 | 1.81063396    | 0.55767601    | 0.35795944    | 20.650423      | 26.2315127     | 26.6800795     | 8.278E-24 | 3.68128  | up        | PREDICTED: 60S ribosomal protein L12-1-like [Cucumis sativus]                            |
| c51687.graph_c0 | 4.11647333    | 5.75328408    | 4.39155798    | 0.84674408     | 0.30581221     | 0.69093626     | 7.261E-26 | -4.04021 | down      | PREDICTED: LOB domain-containing protein 5/-like [Sesamum indicum]                       |
| c51688.graph_c0 | 0.86678195    | 1.7352998     | 1.33661895    | 5.98473518     | 6.54126627     | 6.27143573     | 0.0012586 | 1.16128  | up        | PREDICTED: uncharacterized protein LOC105159746 [Sesamum indicum]                        |
| c51689.graph_c0 | 0             | 0             | 0             | 1.25634949     | 1.7349124      | 1.86942934     | 2.386E-14 | Inf      | up        | PREDICTED: transcription factor PCF7-like [Sesamum indicum]                              |
| c51693.graph_c0 | 2.52684129    | 1.95451437    | 2.50911585    | 2.67126354     | 2.03504107     | 2.1116127      | 0.0043009 | -1.12749 | down      | PREDICTED: zinc finger protein NUTCRACKER-like isoform X1 [Sesamum indicum]              |
| c51694.graph_c0 | 2.19521648    | 1.09870733    | 0.90673074    | 7.69244796     | 7.97453102     | 9.02024515     | 1.042E-05 | 1.47524  | up        | PREDICTED: uncharacterized protein LOC105176347 isoform X3 [Sesamum indicum]             |
| c51700.graph_c0 | 0             | 0             | 0             | 61.6514862     | 61.5329575     | 71.3817092     | 2.53E-106 | Inf      | up        | --                                                                                       |
| c51701.graph_c0 | 2.23459088    | 2.07315811    | 1.68090015    | 8.99190061     | 9.79983714     | 8.82417476     | 1.159E-05 | 1.11775  | up        | PREDICTED: protein SAWADEE HOMEODOMAIN HOMOLOG 1-like [Sesamum indicum]                  |
| c51703.graph_c0 | 2.32665346    | 1.66355946    | 1.38814084    | 9.90441874     | 11.5601551     | 11.679367      | 2.734E-07 | 1.53917  | up        | hypothetical protein MIMGU_mgv1a001920mg [Erythranthe <small>cutifolia</small> ]         |
| c51705.graph_c0 | 0             | 0             | 0             | 1.70028505     | 2.45631677     | 3.56104136     | 4.68E-07  | Inf      | up        | 60S ribosomal protein L8 [Rozella allomycis CSF55]                                       |
| c51715.graph_c0 | 7.67698065    | 7.88689609    | 9.60561291    | 4.99226052     | 3.97724398     | 5.27177435     | 2.09E-08  | -1.91416 | down      | BnaCnng51820D [Brassica napus]                                                           |
| c51716.graph_c0 | 22.053418     | 19.903493     | 19.8224516    | 11.7559961     | 18.0965342     | 14.8103424     | 4.415E-36 | -1.55788 | down      | PREDICTED: SNF1-related protein kinase regulatory subunit gamma-1-like [Sesamum indicum] |

| #ID             | 0 h-1<br>FPKM | 0 h-2<br>FPKM | 0 h-3<br>FPKM | 28 h-1<br>FPKM | 28 h-2<br>FPKM | 28 h-3<br>FPKM | FDR       | log2FC   | regulated | nr_annotation                                                                                      |
|-----------------|---------------|---------------|---------------|----------------|----------------|----------------|-----------|----------|-----------|----------------------------------------------------------------------------------------------------|
| c51717.graph_c0 | 11.6189151    | 6.44395319    | 8.37333493    | 0              | 0              | 0              | 3.035E-28 | -Inf     | down      | 60S ribosomal protein L8 [Rozella allomyces CSF55]                                                 |
| c51719.graph_c0 | 2.54892225    | 1.02954239    | 1.32167927    | 0              | 0              | 0              | 3.672E-10 | -Inf     | down      | Bifunctional monodehydroascorbate reductase and carbonic anhydrase nectarin-3 [Gossypium arboreum] |
| c51720.graph_c0 | 12.6927661    | 15.6642855    | 11.8420202    | 151.391576     | 162.992564     | 140.497053     | 3.97E-82  | 2.41061  | up        | hypothetical protein MIMGU_mgv1a021151mg [Erythranthe guttata]                                     |
| c51724.graph_c0 | 13.1862118    | 12.733554     | 13.456168     | 131.127056     | 157.131004     | 142.373469     | 1.15E-55  | 2.35992  | up        | PREDICTED: 60S acidic ribosomal protein P3-like [Sesamum indicum]                                  |
| c51729.graph_c0 | 14.4472132    | 13.7921577    | 13.3222794    | 2.18753152     | 1.75567632     | 2.18167627     | 1.034E-88 | -3.85141 | down      | PREDICTED: homeobox-leucine zipper protein HOX3 [Sesamum indicum]                                  |
| c51730.graph_c0 | 0.16859296    | 0.25314266    | 0.21664862    | 6.92307997     | 5.64239819     | 4.44935158     | 2.517E-12 | 3.64248  | up        | PREDICTED: uncharacterized protein LOC105170277 [Sesamum indicum]                                  |
| c51731.graph_c0 | 7.3777705     | 8.67463029    | 8.57780079    | 2.8512866      | 2.19019903     | 2.0835462      | 1.764E-41 | -2.88213 | down      | hypothetical protein MIMGU_mgv1a020203mg [Erythranthe guttata]                                     |
| c51733.graph_c0 | 3.61757604    | 2.80350851    | 4.04889251    | 0              | 0              | 0              | 1.753E-33 | -Inf     | down      | -                                                                                                  |
| c51740.graph_c0 | 0.07567624    | 0.11362802    | 0.2431174     | 1.67753209     | 2.38371808     | 1.77277617     | 1.689E-08 | 2.64776  | up        | hypothetical protein MIMGU_mgv1a00752/mg [Erythranthe guttata]                                     |
| c51743.graph_c0 | 1.02070686    | 0.40869158    | 1.04931898    | 10.6825516     | 11.5208258     | 8.95901027     | 6.617E-08 | 2.55788  | up        | -                                                                                                  |
| c51745.graph_c0 | 8.36342989    | 3.88525739    | 5.99713366    | 0              | 0              | 0              | 1.319E-20 | -Inf     | down      | predicted protein [Physcomitrella patens]                                                          |
| c51751.graph_c0 | 5.70270474    | 4.1100589     | 5.56943304    | 0              | 0              | 0              | 5.234E-29 | -Inf     | down      | 30S ribosomal protein S28e [Mucor circinelloides f. circinelloides 1006PhL]                        |
| c51753.graph_c0 | 0             | 0             | 0             | 9.74711242     | 8.04638046     | 11.3622345     | 1.834E-25 | Inf      | up        | Putative non-specific lipid-transfer protein AKCS9 [Aeglops tanschii]                              |
| c51754.graph_c0 | 47.5834595    | 48.0071422    | 40.6035074    | 39.3158472     | 43.4692572     | 40.8938964     | 7.209E-35 | -1.22768 | down      | PREDICTED: uncharacterized protein LOC105174255 [Sesamum indicum]                                  |
| c51757.graph_c0 | 3.0903147     | 4.29640164    | 4.41241859    | 2.49558101     | 1.3519654      | 2.64728584     | 1.121E-06 | -1.95338 | down      | -                                                                                                  |
| c51758.graph_c0 | 21.0961927    | 18.8902051    | 15.3976124    | 8.94238806     | 8.74258515     | 8.60050405     | 1.508E-23 | -2.16208 | down      | PREDICTED: uncharacterized protein LOC105123074 [Populus euphratica]                               |
| c51759.graph_c0 | 0.12874747    | 0.0644382     | 0.41361399    | 4.35114073     | 7.39266259     | 5.91749217     | 1.861E-10 | 3.75258  | up        | PREDICTED: uncharacterized protein LOC105158157 [Sesamum indicum]                                  |
| c51760.graph_c0 | 4.71381345    | 4.58746325    | 4.54307769    | 2.60120131     | 2.31999893     | 2.69202608     | 5.008E-18 | -1.95231 | down      | PREDICTED: uncharacterized protein LOC105156249 [Sesamum indicum]                                  |
| c51767.graph_c0 | 6.03785111    | 4.80412334    | 2.98418374    | 0              | 0              | 0              | 7.056E-18 | -Inf     | down      | predicted protein [Physcomitrella patens]                                                          |
| c51771.graph_c0 | 0.39182902    | 0.78444276    | 0.2517579     | 7.54664553     | 5.91396253     | 5.34468022     | 7.246E-07 | 2.63405  | up        | hypothetical protein MIMGU_mgv1a00021/mg [Erythranthe guttata]                                     |
| c51779.graph_c0 | 0.05179035    | 0.15552663    | 0.06655265    | 14.0024253     | 15.5996791     | 13.1458873     | 2.91E-56  | 6.1962   | up        | PREDICTED: acid phosphatase 1-like [Sesamum indicum]                                               |
| c51780.graph_c0 | 0             | 0.10174174    | 0             | 2.6593682      | 4.66892251     | 3.43586933     | 4.921E-09 | 5.6427   | up        | hypothetical protein M569_05207, partial [Genlisea aurea]                                          |
| c51782.graph_c0 | 44.2094699    | 43.083568     | 45.3394835    | 7.72384325     | 8.71738284     | 10.4623044     | 2.64E-142 | -3.39143 | down      | PREDICTED: uncharacterized protein LOC105172990 [Sesamum indicum]                                  |
| c51793.graph_c0 | 2.95948388    | 2.73009854    | 3.20649647    | 1.47613243     | 2.17057495     | 1.82397533     | 8.162E-09 | -1.79369 | down      | PREDICTED: uncharacterized protein LOC105170241 [Sesamum indicum]                                  |

| #ID             | 0 h-1<br>FPKM | 0 h-2<br>FPKM | 0 h-3<br>FPKM | 28 h-1<br>FPKM | 28 h-2<br>FPKM | 28 h-3<br>FPKM | FDR       | log2FC   | regulated | nr_annotation                                                                                                            |
|-----------------|---------------|---------------|---------------|----------------|----------------|----------------|-----------|----------|-----------|--------------------------------------------------------------------------------------------------------------------------|
| c51794.graph_c0 | 22.7299907    | 25.0232962    | 23.0149428    | 16.8291328     | 15.3811918     | 16.2266935     | 2.054E-52 | -1.6373  | down      | PREDICTED: uncharacterized protein LOC105156609 [Sesamum indicum]                                                        |
| c51795.graph_c0 | 22.8768532    | 24.6376892    | 20.3421322    | 8.83296892     | 8.54501011     | 8.35842866     | 1.097E-75 | -2.48765 | down      | PREDICTED: E3 ubiquitin-protein ligase A1L4-like [Sesamum indicum]                                                       |
| c51802.graph_c0 | 1.59199747    | 1.45699805    | 1.34436957    | 11.0746653     | 13.7603469     | 11.8423021     | 1.659E-18 | 1.97251  | up        | hypothetical protein MIMGU_mgv1a010/0/mg [Erythranthe guttata]                                                           |
| c51806.graph_c0 | 0.74150419    | 0.90461316    | 1.13152391    | 6.39968653     | 5.8391413      | 6.1977986      | 7.823E-15 | 1.63513  | up        | PREDICTED: uncharacterized protein LOC105177377 [Sesamum indicum]                                                        |
| c51809.graph_c0 | 13.9807256    | 13.1026311    | 14.3153673    | 0.85013277     | 0.73103827     | 0.7267348      | 4.75E-147 | -5.25625 | down      | PREDICTED: LOW QUALITY PROTEIN: myb-like protein AA [Sesamum indicum]                                                    |
| c51812.graph_c0 | 0             | 0.27372327    | 0.35139338    | 3.64359394     | 4.96464304     | 3.94617148     | 8.476E-10 | 3.21809  | up        | PREDICTED: calmodulin-like protein 1 [Sesamum indicum]                                                                   |
| c51816.graph_c0 | 9.10935506    | 9.20615436    | 9.45475077    | 0.25463949     | 0.17243669     | 0.25972968     | 7.02E-76  | -6.42722 | down      | hypothetical protein Csa_5G205920 [Cucumis sativus]                                                                      |
| c51818.graph_c0 | 1.42221111    | 1.63299336    | 1.39757462    | 10.36695       | 10.4858259     | 10.0718319     | 4.2E-14   | 1.70589  | up        | PREDICTED: PAC1 complex subunit SP116-like [Sesamum indicum]                                                             |
| c51820.graph_c0 | 18.3593667    | 15.1198768    | 16.8364752    | 16.8613089     | 16.7575518     | 16.1837833     | 3.237E-13 | -1.10487 | down      | PREDICTED: uncharacterized protein LOC105171189 [Sesamum indicum]                                                        |
| c51821.graph_c0 | 1.29892749    | 1.74348778    | 1.44155872    | 7.08039763     | 7.18720897     | 8.03604215     | 3.464E-09 | 1.22405  | up        | PREDICTED: unfunctional aspartate aminotransferase and glutamate/aspartate-prephenate aminotransferase [Sesamum indicum] |
| c51822.graph_c0 | 4.97993555    | 2.65862518    | 3.41302099    | 20.7511605     | 15.6862485     | 17.326563      | 0.0033331 | 1.19569  | up        | -                                                                                                                        |
| c51823.graph_c0 | 0.76433414    | 0.54649965    | 0.65479976    | 3.88859555     | 5.03965202     | 4.4897751      | 5.783E-08 | 1.68161  | up        | hypothetical protein MIMGU_mgv1a021162mg [Erythranthe guttata]                                                           |
| c51825.graph_c0 | 16.9418648    | 18.7607051    | 18.5053219    | 12.6980387     | 12.0905096     | 10.1103081     | 5.537E-23 | -1.72763 | down      | hypothetical protein MIMGU_mgv1a016/48mg [Erythranthe guttata]                                                           |
| c51833.graph_c0 | 2.89418265    | 2.4731177     | 2.99345358    | 14.185632      | 14.8465055     | 15.9292023     | 1.224E-16 | 1.33592  | up        | PREDICTED: uncharacterized CRM domain-containing protein At3g25440, chloroplastic [Sesamum indicum]                      |
| c51834.graph_c0 | 53.7006178    | 49.0866426    | 49.0977161    | 13.228418      | 13.5233959     | 19.7151746     | 4.482E-90 | -2.79635 | down      | unnamed protein product [Coffea canephora]                                                                               |
| c51835.graph_c0 | 60.1854436    | 70.9537485    | 54.5188385    | 9.62409021     | 10.7342749     | 12.7498671     | 3.245E-49 | -3.57517 | down      | hypothetical protein CICLE_v10001854mg [Citrus clementina]                                                               |
| c51837.graph_c0 | 36.9800656    | 37.5546882    | 34.5561356    | 34.2373769     | 35.1926478     | 33.6250055     | 7.851E-41 | -1.1719  | down      | PREDICTED: protein MOS2 [Sesamum indicum]                                                                                |
| c51840.graph_c0 | 1.04933545    | 1.47054068    | 1.48328136    | 17.3884419     | 19.3497249     | 19.5407524     | 1.271E-19 | 2.71962  | up        | PREDICTED: putative DNA-binding protein ESCAROLA [Populus euphratica]                                                    |
| c51841.graph_c0 | 8.05330231    | 3.9531701     | 4.37834367    | 0              | 0              | 0              | 3.905E-18 | -Inf     | down      | uncharacterized protein LOC100191800 [Zea mays]                                                                          |
| c51842.graph_c0 | 4.90721966    | 5.70869569    | 4.77208658    | 5.49439787     | 5.3090613      | 4.79800722     | 0.0008101 | -1.07039 | down      | -                                                                                                                        |
| c51844.graph_c0 | 0             | 0             | 0             | 10.2518055     | 9.0133622      | 7.59657914     | 9.289E-51 | Inf      | up        | hypothetical protein MIMGU_mgv1a004963mg [Erythranthe guttata]                                                           |
| c51845.graph_c0 | 15.8772504    | 17.3494934    | 16.988865     | 6.48234527     | 8.84169043     | 10.1289079     | 5.128E-45 | -2.07034 | down      | PREDICTED: replication protein A 32 kDa subunit A-like isoform X2 [Sesamum indicum]                                      |
| c51847.graph_c0 | 0.31437334    | 0.47203221    | 0.80796439    | 53.0465392     | 58.3142161     | 48.1330264     | 8.15E-120 | 5.54153  | up        | PREDICTED: S-antigen protein-like [Sesamum indicum]                                                                      |
| c51849.graph_c0 | 21.8346699    | 20.3599879    | 21.3565645    | 22.6921057     | 18.5722928     | 21.0734271     | 1.891E-30 | -1.11798 | down      | PREDICTED: uncharacterized protein LOC104243797 [Nicotiana sylvestris]                                                   |
| c51856.graph_c0 | 45.6076529    | 38.5013656    | 45.1416546    | 5.71208102     | 6.72034439     | 8.96891601     | 1.083E-74 | -3.68357 | down      | -                                                                                                                        |

| #ID             | 0 h-1<br>FPKM | 0 h-2<br>FPKM | 0 h-3<br>FPKM | 28 h-1<br>FPKM | 28 h-2<br>FPKM | 28 h-3<br>FPKM | FDR       | log2FC   | regulated | nr_annotation                                                                                           |
|-----------------|---------------|---------------|---------------|----------------|----------------|----------------|-----------|----------|-----------|---------------------------------------------------------------------------------------------------------|
| c51857.graph_c0 | 4.34570843    | 4.93564499    | 3.00698859    | 0              | 0.10968352     | 0.0991253      | 3.005E-28 | -6.96308 | down      | -                                                                                                       |
| c51858.graph_c0 | 1.25155202    | 0.8816037     | 1.25089525    | 23.6164509     | 25.156185      | 23.2569517     | 4.426E-65 | 3.31997  | up        | PREDICTED: LRR receptor-like serine/threonine-protein kinase HSL2 [Sesamum indicum]                     |
| c51863.graph_c0 | 1.62342693    | 1.40545085    | 1.74787038    | 55.1043944     | 58.2480021     | 53.5257301     | 8.76E-177 | 4.0343   | up        | -                                                                                                       |
| c51865.graph_c0 | 92.9783406    | 98.260481     | 95.5279859    | 7.77566292     | 8.54063876     | 8.503444       | 0         | -4.62094 | down      | PREDICTED: ethylene-responsive transcription factor 14-like [Sesamum indicum]                           |
| c51866.graph_c0 | 1426.45982    | 1423.86615    | 1367.47214    | 166.205917     | 159.372296     | 170.3113       | 0         | -4.17814 | down      | hypothetical protein M569_15403, partial [Genlisea aurea]                                               |
| c51869.graph_c0 | 9.83560339    | 5.21229826    | 5.20435167    | 0              | 0              | 0              | 1.017E-16 | -Inf     | down      | predicted protein [Hordeum vulgare subsp. vulgare]                                                      |
| c51870.graph_c0 | 737.950664    | 768.931021    | 704.285105    | 43.7167797     | 45.2471138     | 49.7155694     | 0         | -5.08428 | down      | PREDICTED: zinc finger A20 and AN1 domain-containing stress-associated protein 1-like [Sesamum indicum] |
| c51872.graph_c0 | 0.85324734    | 0.72756814    | 0.73097107    | 23.7948191     | 25.1551034     | 23.7831889     | 2E-110    | 3.88644  | up        | PREDICTED: amino-acid permease BAT1 homolog isoform X1 [Sesamum indicum]                                |
| c51874.graph_c0 | 0.91383771    | 0.52271588    | 1.17431764    | 4.0799136      | 5.65417312     | 4.72278482     | 0.0014211 | 1.37284  | up        | PREDICTED: coatomer subunit alpha-1 [Solanum lycopersicum]                                              |
| c51875.graph_c0 | 20.1945219    | 17.9838373    | 19.9306514    | 3.47097416     | 2.80564417     | 3.23689894     | 5.59E-156 | -3.70108 | down      | hypothetical protein MIMGU_mgv1a017259mg [Erythranthe ontifata]                                         |
| c51877.graph_c0 | 0             | 0             | 0             | 3.21761526     | 3.04354799     | 2.33382025     | 7.412E-15 | Inf      | up        | PREDICTED: myb-related protein 305 [Sesamum indicum]                                                    |
| c51878.graph_c0 | 1.68342197    | 1.40425638    | 0.54081597    | 8.66646814     | 8.28530277     | 7.90373985     | 8.188E-05 | 1.6973   | up        | -                                                                                                       |
| c51882.graph_c0 | 3.69274782    | 3.06325812    | 2.46054       | 15.0719059     | 13.8665525     | 13.7788396     | 2.904E-17 | 1.12659  | up        | PREDICTED: pre-mRNA-splicing factor SYF1 [Sesamum indicum]                                              |
| c51887.graph_c0 | 6.61988652    | 3.15915266    | 4.3523246     | 0              | 0              | 0              | 3.252E-20 | -Inf     | down      | predicted protein [Physcomitrella patens]                                                               |
| c51891.graph_c0 | 0.32319136    | 1.0167614     | 0.11866106    | 4.46297878     | 7.4836383      | 3.36793813     | 0.0055021 | 2.30857  | up        | PREDICTED: E3 ubiquitin-protein ligase PUB24-like [Sesamum indicum]                                     |
| c51894.graph_c0 | 1.73999691    | 2.40077573    | 1.81294453    | 13.6373857     | 14.4117846     | 14.0843049     | 4.223E-17 | 1.73302  | up        | PREDICTED: activating signal cointegrator 1 [Sesamum indicum]                                           |
| c51895.graph_c0 | 0.27571083    | 0.18399127    | 0             | 9.38469941     | 10.6748053     | 9.81075342     | 4.59E-39  | 4.95359  | up        | PREDICTED: cyclin-D1-1-like [Sesamum indicum]                                                           |
| c51898.graph_c0 | 0.12030896    | 0.36128828    | 0             | 2.18599638     | 2.68429969     | 3.6388606      | 1.062E-05 | 3.06899  | up        | PREDICTED: uncharacterized protein LOC105163238 [Sesamum indicum]                                       |
| c51905.graph_c0 | 28.3646374    | 24.1678855    | 30.4832163    | 9.14188391     | 9.97159414     | 11.6651725     | 2.655E-26 | -2.52256 | down      | PREDICTED: cysteine proteinase inhibitor isoform X4 [Sesamum indicum]                                   |
| c51907.graph_c0 | 0.07829528    | 0             | 0             | 3.64189164     | 4.93243004     | 3.34322307     | 5.585E-15 | 6.18962  | up        | PREDICTED: dof zinc finger protein DOF5.6 isoform X2 [Sesamum indicum]                                  |
| c51908.graph_c0 | 1.7674532     | 1.34460951    | 0.99934883    | 9.7113855      | 8.21174228     | 7.63091455     | 9.808E-07 | 1.55131  | up        | hypothetical protein MIMGU_mgv1a014525mg [Erythranthe ontifata]                                         |
| c51910.graph_c0 | 3.46672274    | 4.16423297    | 4.32759381    | 24.3320802     | 27.1044906     | 24.6128767     | 2.094E-13 | 1.57566  | up        | PREDICTED: uncharacterized protein LOC105168519 isoform X2 [Sesamum indicum]                            |
| c51913.graph_c0 | 2.28435017    | 1.82155877    | 1.79114059    | 8.77964055     | 8.35912259     | 8.61071514     | 1.905E-06 | 1.03866  | up        | PREDICTED: uncharacterized protein LOC105168217 [Sesamum indicum]                                       |
| c51919.graph_c0 | 0.45510028    | 0.075926      | 0             | 7.49732328     | 6.07253204     | 6.61257296     | 1.841E-16 | 4.18607  | up        | PREDICTED: F-box/kelch-repeat protein At5g26960 [Sesamum indicum]                                       |
| c51920.graph_c0 | 0.04566381    | 0.13712861    | 0.05867981    | 5.14417025     | 4.49487428     | 3.65597499     | 1.741E-19 | 4.6924   | up        | PREDICTED: protein TIFY 6B [Sesamum indicum]                                                            |

| #ID             | 0 h-1<br>FPKM | 0 h-2<br>FPKM | 0 h-3<br>FPKM | 28 h-1<br>FPKM | 28 h-2<br>FPKM | 28 h-3<br>FPKM | FDR       | log2FC   | regulated | nr_annotation                                                                         |
|-----------------|---------------|---------------|---------------|----------------|----------------|----------------|-----------|----------|-----------|---------------------------------------------------------------------------------------|
| c51922.graph_c0 | 0             | 0             | 0             | 8.06905007     | 6.51288098     | 6.68404077     | 4.554E-15 | Inf      | up        | PREDICTED: uncharacterized protein LOC102617725 [Citrus sinensis]                     |
| c51924.graph_c0 | 5.64326574    | 3.71214521    | 6.21584563    | 0.70311309     | 0.42323013     | 1.14746908     | 5.925E-12 | -3.86479 | down      | -                                                                                     |
| c51926.graph_c0 | 0             | 0.15227936    | 0.13032617    | 17.5798427     | 23.46002       | 14.0442742     | 2.447E-22 | 6.50048  | up        | PREDICTED: WD repeat-containing protein RUP2-like [Sesamum indicum]                   |
| c51927.graph_c0 | 0.31568965    | 0.13543104    | 0.28976693    | 37.1039549     | 38.2661664     | 34.3954153     | 1.18E-160 | 6.1192   | up        | geranyl diphosphate synthase large subunit [Antirrhinum majus]                        |
| c51931.graph_c0 | 10.5402208    | 9.80476082    | 7.6615925     | 3.48207806     | 4.05225379     | 4.41987352     | 3.91E-20  | -2.31424 | down      | PREDICTED: histone H3.2-like [Oryza brachyantha]                                      |
| c51933.graph_c0 | 0.14304274    | 0.09545732    | 0.3063593     | 4.22781396     | 3.66087208     | 3.11053101     | 1.157E-12 | 3.23111  | up        | hypothetical protein MIMGU_mgv1a008682mg [Erythranthe guttata]                        |
| c51938.graph_c0 | 0             | 0.21471573    | 0.2756422     | 4.05334924     | 2.4633231      | 2.98947104     | 3.441E-07 | 3.16787  | up        | PREDICTED: ABC transporter B family member 15-like [Sesamum indicum]                  |
| c51940.graph_c0 | 0             | 0             | 0             | 5.18638696     | 4.3561127      | 4.13362965     | 4.102E-17 | Inf      | up        | PREDICTED: kirola-like isoform X2 [Sesamum indicum]                                   |
| c51942.graph_c0 | 19.6257528    | 23.2457581    | 22.506975     | 14.0365711     | 15.8036516     | 16.3227208     | 4.589E-23 | -1.59358 | down      | PREDICTED: set1/Ash2 histone methyltransferase complex subunit ASH2 [Sesamum indicum] |
| c51943.graph_c0 | 34.3959697    | 34.9382352    | 34.4213813    | 7.07930407     | 5.06029203     | 6.43856262     | 1.06E-129 | -3.57144 | down      | PREDICTED: ethylene-responsive transcription factor ERF008-like [Sesamum indicum]     |
| c51945.graph_c0 | 22.41656      | 25.1565336    | 23.7227259    | 6.42669147     | 7.58423049     | 8.97021854     | 3.643E-79 | -2.72322 | down      | PREDICTED: chaperone protein dnaJ 11, chloroplastic-like [Sesamum indicum]            |
| c51947.graph_c0 | 0.14468401    | 0.25345056    | 0.09296234    | 4.60055335     | 3.67914052     | 4.82658938     | 8.773E-19 | 3.65471  | up        | PREDICTED: aldehyde dehydrogenase family 2 member C4-like [Sesamum indicum]           |
| c51949.graph_c0 | 2.52124681    | 3.07241742    | 1.90168159    | 1.55357996     | 1.87031606     | 1.4302353      | 2.284E-07 | -1.71437 | down      | PREDICTED: neural Wiskott-Aldrich syndrome protein [Sesamum indicum]                  |
| c51950.graph_c0 | 16.5715046    | 15.6070819    | 13.7387352    | 6.24867283     | 6.6651201      | 6.92177665     | 1.727E-69 | -2.29892 | down      | PREDICTED: U-box domain-containing protein 26-like [Sesamum indicum]                  |
| c51953.graph_c0 | 3.72458321    | 3.976867      | 3.03128336    | 0.81210168     | 0.8961965      | 1.54622613     | 1.414E-12 | -2.80625 | down      | -                                                                                     |
| c51958.graph_c0 | 7.06947151    | 3.6076532     | 5.16572495    | 0              | 0              | 0              | 2.598E-18 | -Inf     | down      | predicted protein [Physcomitrella patens]                                             |
| c51963.graph_c0 | 1.22193814    | 0.78631825    | 1.53285224    | 6.82989341     | 6.83497744     | 7.21229526     | 7.561E-12 | 1.46476  | up        | PREDICTED: D-3-phosphoglycerate dehydrogenase 2, chloroplastic-like [Sesamum indicum] |
| c51965.graph_c0 | 0.07411406    | 0             | 0             | 10.9347315     | 9.28940951     | 8.35125029     | 4.928E-30 | 7.53119  | up        | PREDICTED: subtilisin-like protease [Sesamum indicum]                                 |
| c51971.graph_c0 | 1.48248172    | 1.07924814    | 0.17318615    | 15.6721333     | 14.5926691     | 15.905489      | 2.397E-14 | 3.00519  | up        | PREDICTED: UDP-glucose 6-dehydrogenase 5 [Nicotiana glauca]                           |
| c51972.graph_c0 | 47.7576768    | 49.4687654    | 46.5616854    | 37.0863345     | 33.3447875     | 37.3190751     | 2.946E-62 | -1.50599 | down      | PREDICTED: transcription factor GTE7-like [Sesamum indicum]                           |
| c51974.graph_c0 | 14.6783689    | 12.8137213    | 15.5723517    | 6.07836678     | 6.16021921     | 5.66845446     | 3.015E-19 | -2.35811 | down      | hypothetical protein MIMGU_mgv1a0003262mg, partial [Erythranthe guttata]              |
| c51983.graph_c0 | 2.59302187    | 3.91991348    | 3.12812745    | 15.2305912     | 15.2103196     | 16.4137977     | 4.319E-10 | 1.18974  | up        | hypothetical protein MIMGU_mgv1a013022mg [Erythranthe guttata]                        |
| c51984.graph_c0 | 4.90800446    | 3.94113289    | 4.22775585    | 31.0456111     | 27.0933608     | 27.9558226     | 1.397E-40 | 1.62973  | up        | PREDICTED: uncharacterized protein LOC105164204 [Sesamum indicum]                     |



| #ID             | 0 h-1<br>FPKM | 0 h-2<br>FPKM | 0 h-3<br>FPKM | 28 h-1<br>FPKM | 28 h-2<br>FPKM | 28 h-3<br>FPKM | FDR       | log2FC   | regulated | nr_annotation                                                                                           |
|-----------------|---------------|---------------|---------------|----------------|----------------|----------------|-----------|----------|-----------|---------------------------------------------------------------------------------------------------------|
| c51987.graph_c0 | 0.78242579    | 1.34264446    | 0.57454178    | 3.81816286     | 4.54769086     | 4.64024        | 0.008681  | 1.18311  | up        | PREDICTED: RPM1-interacting protein 4 [Sesamum indicum]                                                 |
| c51991.graph_c0 | 14.3425789    | 14.9704853    | 14.3350524    | 70.8304479     | 72.0781322     | 81.3520982     | 4.884E-21 | 1.27139  | up        | PREDICTED: mitochondrial import inner membrane translocase subunit Tim13 [Sesamum indicum]              |
| c51992.graph_c0 | 0.4492542     | 0.14990135    | 0             | 1.30606144     | 1.76887654     | 1.46538627     | 0.0043465 | 1.85667  | up        | PREDICTED: cucumber peeling cupredoxin-like [Sesamum indicum]                                           |
| c51993.graph_c0 | 1.9884685     | 1.89788013    | 2.02043873    | 19.157401      | 28.2219707     | 21.1447193     | 2.348E-12 | 2.44437  | up        | PREDICTED: U-box domain-containing protein 26-like [Sesamum indicum]                                    |
| c51995.graph_c0 | 5.28104004    | 2.67158522    | 3.64857287    | 0              | 0              | 0              | 3.155E-20 | -Inf     | down      | --                                                                                                      |
| c52000.graph_c0 | 1.30455013    | 1.89942755    | 0.76199935    | 17.0665113     | 12.9190418     | 15.121812      | 2.348E-12 | 2.4242   | up        | PREDICTED: probable serine/threonine-protein kinase DDB_G0282963 isoform X2 [Nicotiana tomentosiformis] |
| c52001.graph_c0 | 1.90659104    | 1.93928246    | 2.7661798     | 13.9910937     | 14.9533396     | 16.2130569     | 2.315E-22 | 1.67657  | up        | PREDICTED: kynurenine--oxoglutarate transaminase 1-like [Sesamum indicum]                               |
| c52003.graph_c0 | 16.1798278    | 8.14178779    | 9.32817679    | 0              | 0              | 0              | 1.157E-19 | -Inf     | down      | -                                                                                                       |
| c52004.graph_c0 | 0.116696      | 0             | 0             | 3.47737323     | 2.29737219     | 2.62988561     | 1.404E-10 | 5.11141  | up        | hypothetical protein MIMGU_mgv1a0000/UmG [Erythranthe outtata]                                          |
| c52011.graph_c0 | 3.68857871    | 3.69227227    | 3.87815701    | 2.51836274     | 1.90709617     | 2.58527657     | 7.295E-07 | -1.77366 | down      | -                                                                                                       |
| c52012.graph_c0 | 18.7140174    | 20.116707     | 19.2893641    | 10.6584915     | 10.2068681     | 11.0985007     | 1.635E-58 | -1.95299 | down      | PREDICTED: RING-H2 finger protein AIL52-like [Sesamum indicum]                                          |
| c52017.graph_c0 | 10.854695     | 11.0497265    | 8.27466016    | 8.06741519     | 8.24996963     | 8.1104791      | 5.807E-14 | -1.39212 | down      | hypothetical protein MIMGU_mgv1a014249mg [Erythranthe outtata]                                          |
| c52018.graph_c0 | 2.24672554    | 1.12448765    | 0.36089141    | 11.2262368     | 12.3477824     | 12.9912795     | 5.921E-06 | 2.22     | up        | hypothetical protein JCGZ_17967 [Jatropha curcas]                                                       |
| c52023.graph_c0 | 11.0624211    | 9.50093058    | 9.25278932    | 1.28451364     | 0.77319692     | 1.47517779     | 6.977E-73 | -4.16353 | down      | -                                                                                                       |
| c52026.graph_c0 | 1.28557144    | 1.96415282    | 1.56506229    | 16.9657547     | 12.6988027     | 12.038189      | 1.004E-09 | 2.02228  | up        | PREDICTED: uncharacterized protein LOC105168444 [Sesamum indicum]                                       |
| c52029.graph_c0 | 0.18194257    | 0.31871832    | 0.05845085    | 5.48774461     | 15.4318858     | 5.28722373     | 0.0020587 | 4.46731  | up        | PREDICTED: epidermis-specific secreted glycoprotein EPI-like [Vitis vinifera]                           |
| c52032.graph_c0 | 19.9690778    | 20.7203814    | 20.698726     | 12.2883582     | 11.6659778     | 11.8015604     | 1.301E-72 | -1.87072 | down      | PREDICTED: cyclin-dependent kinase F-1 [Sesamum indicum]                                                |
| c52038.graph_c0 | 0.54335573    | 0.54389982    | 0.34911681    | 7.89815623     | 6.77472982     | 8.37828028     | 6.544E-08 | 2.92002  | up        | PREDICTED: uncharacterized protein LOC104246111 isoform X2 [Nicotiana glauca]                           |
| c52039.graph_c0 | 0.10764661    | 0.1077544     | 0.27666031    | 7.43250881     | 9.53648326     | 5.55414089     | 5.309E-11 | 4.41001  | up        | hypothetical protein MIMGU_mgv1a019582mg [Erythranthe outtata]                                          |
| c52040.graph_c0 | 0.47198428    | 0.52495212    | 0.4717366     | 15.8939762     | 16.8630154     | 16.63934       | 5.822E-48 | 3.98162  | up        | PREDICTED: transmembrane protein 87A-like [Sesamum indicum]                                             |
| c52041.graph_c0 | 9.28622104    | 10.302041     | 7.14469554    | 5.5025096      | 6.09386946     | 4.41984661     | 1.837E-12 | -1.82742 | down      | PREDICTED: protein MKS1 [Sesamum indicum]                                                               |
| c52042.graph_c0 | 26.3790729    | 26.0781468    | 20.7311019    | 9.50685527     | 9.15605222     | 10.311032      | 2.478E-39 | -2.42382 | down      | PREDICTED: uncharacterized protein LOC105164219 [Sesamum indicum]                                       |
| c52044.graph_c0 | 0.5181383     | 0.20746285    | 0             | 3.0879554      | 2.7881342      | 2.70411808     | 2.414E-06 | 2.49803  | up        | PREDICTED: LOW QUALITY PROTEIN: BTB/POZ domain-containing protein At1g63850 [Sesamum indicum]           |
| c52045.graph_c0 | 0.1002416     | 0.20068395    | 0.12881442    | 5.09985121     | 4.73624999     | 2.73465856     | 4.158E-07 | 3.77689  | up        | -                                                                                                       |
| c52048.graph_c0 | 4.26825674    | 1.67550226    | 3.22639935    | 0              | 0              | 0              | 4.757E-12 | -Inf     | down      | tamavidin1 [Pleurotus cornucopiae]                                                                      |

| #ID             | 0 h-1<br>FPKM | 0 h-2<br>FPKM | 0 h-3<br>FPKM | 28 h-1<br>FPKM | 28 h-2<br>FPKM | 28 h-3<br>FPKM | FDR       | log2FC   | regulated | nr_annotation                                                                                                         |
|-----------------|---------------|---------------|---------------|----------------|----------------|----------------|-----------|----------|-----------|-----------------------------------------------------------------------------------------------------------------------|
| c52049.graph_c0 | 0.84173703    | 0.96294846    | 1.5452363     | 9.43873133     | 9.98212603     | 8.9855823      | 2.057E-12 | 1.98496  | up        | PREDICTED: serine/threonine-protein kinase BLUST [Sesamum indicum]                                                    |
| c52052.graph_c0 | 12.045374     | 14.2846053    | 11.8309166    | 9.08907564     | 8.20658312     | 8.50862791     | 1.014E-26 | -1.65427 | down      | PREDICTED: 5'-adenylylsulfate reductase-like 5 isoform X2 [Sesamum indicum]                                           |
| c52053.graph_c0 | 33.9792454    | 28.0625141    | 30.3159903    | 3.5929607      | 2.5049431      | 2.74626794     | 2.36E-126 | -4.47412 | down      | PREDICTED: uncharacterized protein LOC105180043 [Sesamum indicum]                                                     |
| c52056.graph_c0 | 2.08753852    | 1.23611849    | 1.54908951    | 0              | 0              | 0              | 3.723E-28 | -Inf     | down      | putative Bax inhibitor 1 [Auxenochlorella protothecoides]                                                             |
| c52059.graph_c0 | 3.07400349    | 2.69244643    | 3.16017295    | 0.72610461     | 1.00862212     | 0.59249543     | 6.381E-16 | -3.03286 | down      | PREDICTED: shikimate O-hydroxycinnamoyltransferase-like [Sesamum indicum]                                             |
| c52060.graph_c0 | 0             | 0             | 0             | 4.03072271     | 2.50206323     | 5.68729283     | 1.137E-06 | Inf      | up        | --                                                                                                                    |
| c52068.graph_c0 | 1.05107943    | 0.61374362    | 1.57579179    | 14.9600701     | 17.6460212     | 19.6875098     | 5.088E-21 | 2.91486  | up        | PREDICTED: outer envelope pore protein 16, chloroplastic [Nicotiana tomentosiformis]                                  |
| c52071.graph_c0 | 0             | 0.16320341    | 0.20951305    | 7.10979868     | 7.59638656     | 6.09161455     | 1.711E-12 | 4.69214  | up        | hypothetical protein MIMGU_mgv1a026849mg [Erythranthe guttata]                                                        |
| c52074.graph_c0 | 0.83946836    | 0.31511586    | 0.26968752    | 3.88951989     | 4.8890764      | 3.60943834     | 2.583E-05 | 2.04184  | up        | -                                                                                                                     |
| c52081.graph_c0 | 61.5450933    | 66.7713567    | 76.5621209    | 44.9984671     | 48.7713989     | 42.6195502     | 1.423E-14 | -1.68083 | down      | PREDICTED: probable cyclic nucleotide-gated ion channel 17 [Sesamum indicum]                                          |
| c52084.graph_c0 | 75.9287299    | 78.5947004    | 82.9932558    | 14.4651542     | 17.9910839     | 15.580551      | 5.59E-135 | -3.39786 | down      | PREDICTED: transcription factor TGA5-like [Sesamum indicum]                                                           |
| c52089.graph_c0 | 17.250026     | 17.7537021    | 15.9227505    | 13.655563      | 14.7478009     | 13.664373      | 1.811E-34 | -1.36537 | down      | PREDICTED: uncharacterized protein LOC105176476 isoform X2 [Sesamum indicum]                                          |
| c52091.graph_c0 | 6.74689105    | 4.890572      | 4.18552792    | 0              | 0              | 0              | 1.595E-26 | -Inf     | down      | -                                                                                                                     |
| c52093.graph_c0 | 5.53492119    | 6.00216888    | 4.14901251    | 5.11224329     | 2.95113408     | 5.53926969     | 1.726E-05 | -1.2903  | down      | -                                                                                                                     |
| c52094.graph_c0 | 4.14557806    | 4.8136859     | 5.11414265    | 2.41038579     | 1.30581142     | 2.75359717     | 1.19E-08  | -2.21161 | down      | -                                                                                                                     |
| c52102.graph_c0 | 47.4168469    | 48.1497331    | 51.4736859    | 30.8543256     | 30.1052214     | 31.0650184     | 6.321E-38 | -1.76762 | down      | PREDICTED: transcription factor ILR3-like [Sesamum indicum]                                                           |
| c52103.graph_c0 | 0.64829814    | 0.64894731    | 0.29403133    | 20.4547271     | 19.294537      | 18.7489811     | 1.845E-77 | 4.11834  | up        | PREDICTED: brefeldin A-inhibited guanine nucleotide-exchange protein 2 [Sesamum indicum]                              |
| c52106.graph_c0 | 6.04812392    | 4.88041057    | 5.07564323    | 0.35883605     | 0.48599296     | 0.54901366     | 1.374E-48 | -4.609   | down      | PREDICTED: ethylene-responsive transcription factor ERF054-like [Sesamum indicum]                                     |
| c52108.graph_c0 | 35.6084285    | 35.644085     | 33.0370699    | 32.9674697     | 36.7476105     | 33.385511      | 1.977E-15 | -1.1064  | down      | -                                                                                                                     |
| c52109.graph_c0 | 0             | 0             | 0             | 3.53965204     | 3.12939112     | 3.73075591     | 2.875E-14 | Inf      | up        | PREDICTED: serine/threonine-protein kinase D6PK-like [Sesamum indicum]                                                |
| c52110.graph_c0 | 181.367503    | 177.293589    | 183.896985    | 43.474757      | 48.1731228     | 50.1053963     | 0         | -3.02685 | down      | PREDICTED: oleosin 1 [Sesamum indicum]                                                                                |
| c52113.graph_c0 | 0             | 0             | 0             | 30.6682257     | 28.1598634     | 28.8423979     | 3.917E-48 | Inf      | up        | -                                                                                                                     |
| c52114.graph_c0 | 12.5223818    | 12.214426     | 10.6516456    | 106.473639     | 103.676226     | 108.211711     | 3.79E-121 | 2.08098  | up        | PREDICTED: protein rough sheath 2 homolog [Sesamum indicum]                                                           |
| c52117.graph_c0 | 0.04752541    | 0.09514599    | 0.06107203    | 2.27971866     | 2.90043356     | 2.53667974     | 1.265E-12 | 4.15171  | up        | PREDICTED: serine/threonine protein phosphatase 2A 57 kDa regulatory subunit B&#x27E8; iota isoform [Sesamum indicum] |

| #ID             | 0 h-1<br>FPKM | 0 h-2<br>FPKM | 0 h-3<br>FPKM | 28 h-1<br>FPKM | 28 h-2<br>FPKM | 28 h-3<br>FPKM | FDR       | log2FC   | regulated | nr_annotation                                                                                     |
|-----------------|---------------|---------------|---------------|----------------|----------------|----------------|-----------|----------|-----------|---------------------------------------------------------------------------------------------------|
| c52118.graph_c0 | 0             | 0.32407226    | 0.03782083    | 3.23000301     | 5.25336454     | 3.31638844     | 3.279E-09 | 3.93864  | up        | PREDICTED: MLO-like protein 6 [Sesamum indicum]                                                   |
| c52120.graph_c0 | 0.32428432    | 0.05410151    | 0.2083591     | 8.75973648     | 9.64712126     | 8.84669538     | 1.041E-29 | 4.4506   | up        | PREDICTED: probable pectinesterase/pectinesterase inhibitor 12 [Sesamum indicum]                  |
| c52127.graph_c0 | 6.36372991    | 4.39996751    | 5.31125389    | 0              | 0              | 0              | 1.805E-53 | -Inf     | down      | NADH dehydrogenase subunit 1 (mitochondrion) [Micromonas pusilla CCMP1545]                        |
| c52131.graph_c0 | 1.60464789    | 0.62853445    | 1.34480613    | 8.41727421     | 9.33977061     | 8.44071754     | 8.678E-09 | 1.78184  | up        | PREDICTED: uncharacterized protein LOC105174462 isoform X1 [Sesamum indicum]                      |
| c52132.graph_c0 | 2.72443107    | 2.0094857     | 3.50100178    | 2.08431663     | 3.01110799     | 2.21102095     | 0.0042387 | -1.26869 | down      | -                                                                                                 |
| c52133.graph_c0 | 10.6526597    | 9.22787887    | 8.95055847    | 4.91337739     | 4.70518694     | 5.34570111     | 2.5E-10   | -2.03416 | down      | -                                                                                                 |
| c52136.graph_c0 | 52.1327056    | 62.5931119    | 51.5990727    | 21.8353614     | 23.9916456     | 25.5469083     | 1.099E-35 | -2.30995 | down      | PREDICTED: cell division cycle protein 48 homolog [Nicotiana tomentosiformis]                     |
| c52137.graph_c0 | 6.85728129    | 4.94857168    | 4.71333007    | 0              | 0              | 0              | 2.367E-37 | -Inf     | down      | rpl13 protein isoform 1 [Lichtheimia corymbifera JMRC:FSU:9682]                                   |
| c52139.graph_c0 | 32.2669683    | 40.9124198    | 30.8678915    | 8.0777205      | 8.70505475     | 8.50497286     | 2.999E-29 | -3.13    | down      | PREDICTED: ethylene-responsive transcription factor ERF008-like [Sesamum indicum]                 |
| c52140.graph_c0 | 54.1557491    | 43.2526419    | 48.1223224    | 257.794608     | 267.924759     | 267.987584     | 5.861E-42 | 1.35779  | up        | PREDICTED: 60S ribosomal protein L17-2 [Sesamum indicum]                                          |
| c52147.graph_c0 | 9.27974669    | 7.25898408    | 7.97621875    | 38.6801848     | 41.7804448     | 38.5240066     | 1.014E-19 | 1.18962  | up        | PREDICTED: transmembrane emp24 domain-containing protein p24beta3 [Sesamum indicum]               |
| c52153.graph_c0 | 0.06339357    | 0.1269141     | 0             | 17.4160027     | 16.0994227     | 18.7228449     | 1.051E-58 | 7.02712  | up        | PREDICTED: probable 3-beta-hydroxysteroid-Delta(8),Delta(7)-isomerase [Sesamum indicum]           |
| c52155.graph_c0 | 17.9292118    | 15.781128     | 13.5060586    | 93.2379625     | 94.7336375     | 92.7643289     | 9.383E-14 | 1.48459  | up        | hypothetical protein MIMGU_mgv1a011603mg [Erythranthe guttata]                                    |
| c52157.graph_c0 | 0.30978149    | 0.41345559    | 0.39808148    | 10.1316332     | 9.48672647     | 10.4719512     | 3.264E-16 | 3.65351  | up        | PREDICTED: choline transporter-like protein 2 [Sesamum indicum]                                   |
| c52158.graph_c0 | 6.61206508    | 6.61868606    | 7.33405014    | 42.4917165     | 47.3637849     | 42.2266312     | 1.228E-30 | 1.59083  | up        | PREDICTED: 50S ribosomal protein L12, chloroplastic-like [Sesamum indicum]                        |
| c52160.graph_c0 | 6.08778224    | 3.14850375    | 2.34691236    | 0              | 0              | 0              | 6.665E-10 | -Inf     | down      | -                                                                                                 |
| c52162.graph_c0 | 0             | 0.38492448    | 0             | 20.1226346     | 22.4587203     | 18.2443395     | 2.57E-15  | 6.22147  | up        | -                                                                                                 |
| c52165.graph_c0 | 23.8591949    | 21.9913567    | 20.4906008    | 1.54521315     | 0.85261159     | 1.54107716     | 7.61E-112 | -5.16107 | down      | hypothetical protein MIMGU_mgv1a011603mg [Erythranthe guttata]                                    |
| c52171.graph_c0 | 0.27723418    | 0.27751178    | 0.71251379    | 6.24625826     | 6.27653555     | 8.13859157     | 2.807E-09 | 2.92418  | up        | enolase [Prunus armeniaca]                                                                        |
| c52173.graph_c0 | 12.3555667    | 11.1271425    | 9.58295692    | 9.38681348     | 8.94772648     | 9.66338075     | 4.469E-20 | -1.32722 | down      | PREDICTED: pentatricopeptide repeat-containing protein At3g09650, chloroplastic [Sesamum indicum] |
| c52175.graph_c0 | 19.5522181    | 20.6951228    | 18.3587173    | 14.4927661     | 14.6434195     | 15.0256483     | 2.009E-42 | -1.49767 | down      | PREDICTED: mitogen-activated protein kinase kinase kinase 1-like [Sesamum indicum]                |
| c52177.graph_c0 | 9.61483347    | 8.85450437    | 9.94613055    | 5.031364       | 4.76368294     | 5.64513391     | 1.251E-31 | -1.9705  | down      | PREDICTED: dnaJ protein ERDJ3A [Sesamum indicum]                                                  |
| c52179.graph_c0 | 16.4029273    | 16.0772825    | 12.7348733    | 8.19606771     | 15.4733142     | 10.5385474     | 1.837E-06 | -1.49095 | down      | hypothetical protein MIMGU_mgv1a0261451mg, partial [Erythranthe guttata]                          |

| #ID             | 0 h-1<br>FPKM | 0 h-2<br>FPKM | 0 h-3<br>FPKM | 28 h-1<br>FPKM | 28 h-2<br>FPKM | 28 h-3<br>FPKM | FDR       | log2FC   | regulated | nr_annotation                                                                                      |
|-----------------|---------------|---------------|---------------|----------------|----------------|----------------|-----------|----------|-----------|----------------------------------------------------------------------------------------------------|
| c52180.graph_c0 | 0.69492397    | 1.39123967    | 0.66975362    | 6.31333425     | 7.52446054     | 7.6244112      | 5.663E-05 | 1.87357  | up        | -                                                                                                  |
| c52181.graph_c0 | 1.34331797    | 0.67233155    | 1.23301198    | 74.1999976     | 67.3734359     | 78.47157       | 2.29E-107 | 4.99138  | up        | Alpha-xylosidase, partial [Medicago truncatula]                                                    |
| c52184.graph_c0 | 0.95167982    | 0.85736951    | 0.978357      | 5.94840852     | 6.43253585     | 5.98265575     | 3.951E-05 | 1.62839  | up        | PREDICTED: probable LRR receptor-like serine/threonine-protein kinase At1g67720 [Sesamum indicum]  |
| c52190.graph_c0 | 17.4657531    | 16.9282189    | 18.7034869    | 111.62668      | 134.445211     | 110.158714     | 7.81E-23  | 1.65383  | up        | PREDICTED: probable E3 ubiquitin-protein ligase RHA2B [Sesamum indicum]                            |
| c52194.graph_c0 | 18.0588731    | 12.3008874    | 12.495736     | 0              | 0              | 0              | 1.712E-46 | -Inf     | down      | --                                                                                                 |
| c52196.graph_c0 | 1.16834006    | 1.75426497    | 1.87670404    | 19.3179992     | 16.8673198     | 18.8813509     | 3.264E-08 | 2.42522  | up        | PREDICTED: aldo-keto reductase family 4 member C9-like [Sesamum indicum]                           |
| c52197.graph_c0 | 19.237124     | 20.7376476    | 20.2834592    | 9.08195508     | 12.8397147     | 12.0913072     | 1.017E-19 | -1.91592 | down      | PREDICTED: splicing factor 3B subunit 2 [Sesamum indicum]                                          |
| c52199.graph_c0 | 4.31632389    | 2.19890022    | 3.16951262    | 0              | 0              | 0              | 3.095E-22 | -Inf     | down      | --                                                                                                 |
| c52203.graph_c0 | 0             | 0             | 0             | 4.4198441      | 3.39634453     | 4.37390918     | 3.196E-14 | Inf      | up        | -                                                                                                  |
| c52213.graph_c0 | 0             | 0.1486544     | 0.1908357     | 4.31732336     | 3.31341747     | 2.73024797     | 4.189E-09 | 3.82127  | up        | hypothetical protein MIMGU_mgv1a0183231mg, partial [Erythranthe guttata]                           |
| c52214.graph_c0 | 3.15333585    | 2.59946518    | 3.81379897    | 0.40443994     | 0.06086189     | 0.27501641     | 2.856E-22 | -4.78354 | down      | PREDICTED: uncharacterized protein LOC105178332 [Sesamum indicum]                                  |
| c52215.graph_c0 | 0             | 0.71665974    | 0.46000744    | 4.50964041     | 4.22838949     | 4.59978718     | 1.1E-06   | 2.40223  | up        | -                                                                                                  |
| c52217.graph_c0 | 0.43598431    | 0.52370505    | 0.11205142    | 6.52754013     | 5.20710545     | 5.17128101     | 1.346E-09 | 2.90149  | up        | PREDICTED: zinc finger protein JACKDAW-like [Sesamum indicum]                                      |
| c52218.graph_c0 | 158.251382    | 160.732572    | 149.09039     | 31.3680525     | 26.7997002     | 28.0731142     | 1.03E-126 | -3.53004 | down      | -                                                                                                  |
| c52220.graph_c0 | 11.7609519    | 14.333564     | 14.7023535    | 0.38736218     | 0.34975173     | 0.31608437     | 2.443E-79 | -6.36912 | down      | PREDICTED: transcription factor MYB44-like [Sesamum indicum]                                       |
| c52223.graph_c0 | 14.5762838    | 15.0311218    | 15.7841828    | 12.5346628     | 11.7299249     | 11.4019083     | 1.898E-40 | -1.43962 | down      | PREDICTED: ectonucleotide pyrophosphatase/phosphodiesterase family member 1-like [Sesamum indicum] |
| c52226.graph_c0 | 13.7597318    | 11.981067     | 10.6575233    | 2.9453509      | 3.64891086     | 4.02426801     | 2.477E-38 | -2.86404 | down      | hypothetical protein MIMGU_mgv1a016982mg [Erythranthe guttata]                                     |
| c52230.graph_c0 | 14.1895426    | 10.2482763    | 13.1562667    | 10.182335      | 14.497748      | 15.0195771     | 8.906E-05 | -1.01108 | down      | PREDICTED: protein-L-isoaspartate O-methyltransferase 1 isoform X2 [Sesamum indicum]               |
| c52231.graph_c0 | 25.609214     | 19.645405     | 20.2989192    | 19.8302777     | 20.5749077     | 26.4011414     | 1.697E-06 | -1.05948 | down      | PREDICTED: L-ascorbate oxidase homolog [Nicotiana tomentosiformis]                                 |
| c52232.graph_c0 | 14.1648219    | 14.5200816    | 15.3875595    | 78.8568952     | 85.446848      | 77.6835593     | 2.009E-47 | 1.36505  | up        | PREDICTED: cytochrome c1-2, heme protein, mitochondrial-like [Sesamum indicum]                     |
| c52233.graph_c0 | 234.458802    | 248.35368     | 215.778928    | 58.375412      | 67.7180807     | 55.2645263     | 1.25E-188 | -3.03567 | down      | PREDICTED: probable calcium-binding protein CML18 [Sesamum indicum]                                |
| c52235.graph_c0 | 0             | 0             | 0             | 11.9582673     | 17.6875089     | 6.29124442     | 4.103E-08 | Inf      | up        | PREDICTED: pathogenesis-related protein STH-2-like [Sesamum indicum]                               |
| c52237.graph_c0 | 22.6625815    | 26.6021566    | 18.2276357    | 11.1386846     | 14.1228595     | 14.0203827     | 8.497E-12 | -1.86795 | down      | -                                                                                                  |
| c52248.graph_c0 | 9.2696467     | 7.38250543    | 7.30362403    | 0              | 0              | 0              | 2.31E-101 | -Inf     | down      | -                                                                                                  |

| #ID             | 0 h-1<br>FPKM | 0 h-2<br>FPKM | 0 h-3<br>FPKM | 28 h-1<br>FPKM | 28 h-2<br>FPKM | 28 h-3<br>FPKM | FDR       | log2FC   | regulated | nr_annotation                                                                             |
|-----------------|---------------|---------------|---------------|----------------|----------------|----------------|-----------|----------|-----------|-------------------------------------------------------------------------------------------|
| c52251.graph_c0 | 17.6023506    | 16.5380483    | 14.2861374    | 3.92776355     | 1.51988667     | 3.20502298     | 7.302E-43 | -3.57101 | down      | PREDICTED: dynamin-related protein 4C-like [Sesamum indicum]                              |
| c52252.graph_c0 | 6.68791822    | 3.01914017    | 4.54989161    | 0              | 0              | 0              | 3.358E-14 | -Inf     | down      | --                                                                                        |
| c52253.graph_c0 | 12.0430756    | 7.90500647    | 9.13327607    | 0.71744573     | 1.48990832     | 0.8196018      | 1.769E-23 | -4.35399 | down      | hypothetical protein L484_021523 [Morus notabilis]                                        |
| c52257.graph_c0 | 9.27455744    | 7.17387985    | 6.22995433    | 0              | 0              | 0              | 2.404E-38 | -Inf     | down      | 60s ribosomal protein l43 [Moniliophthora roleri MCA 2997]                                |
| c52260.graph_c0 | 0.13731092    | 0.54979367    | 0.70579988    | 12.6741918     | 12.7051068     | 12.4593044     | 7.096E-16 | 3.65934  | up        | PREDICTED: uncharacterized protein LOC105162704 [Sesamum indicum]                         |
| c52262.graph_c0 | 0.56132979    | 0.56189188    | 0.24044367    | 11.2872048     | 18.5407764     | 9.54316817     | 3.287E-06 | 3.76805  | up        | hypothetical protein MIMGU_mgv1a010/66mg [Erythranthe guttata]                            |
| c52266.graph_c0 | 31.6340027    | 35.57658      | 27.3705572    | 28.4873656     | 23.9018985     | 27.8048562     | 4.873E-15 | -1.32598 | down      | hypothetical protein M569_00407, partial [Genlisea aurea]                                 |
| c52267.graph_c0 | 7.57177698    | 3.15806624    | 5.6758527     | 0              | 0              | 0              | 6.722E-13 | -Inf     | down      | -                                                                                         |
| c52269.graph_c0 | 5.31268265    | 4.78022696    | 6.13663599    | 35.8356585     | 33.4922336     | 34.6580279     | 1.481E-28 | 1.58688  | up        | PREDICTED: probable protein Pop3 [Sesamum indicum]                                        |
| c52273.graph_c0 | 28.8567249    | 28.4654661    | 26.2945332    | 25.7776024     | 23.6879195     | 23.6480443     | 6.78E-22  | -1.28315 | down      | hypothetical protein MIMGU_mgv1a000/59mg [Erythranthe guttata]                            |
| c52275.graph_c0 | 0             | 0.07901046    | 0             | 1.72100703     | 2.07187732     | 2.76184445     | 3.617E-10 | 5.29444  | up        | -                                                                                         |
| c52276.graph_c0 | 8.31860792    | 11.0629316    | 9.00992415    | 7.77332095     | 7.33051688     | 6.90678565     | 2.696E-09 | -1.4583  | down      | -                                                                                         |
| c52278.graph_c0 | 3.93935063    | 2.55154401    | 3.87111057    | 14.9891566     | 17.6395635     | 17.8655486     | 0.0008155 | 1.19365  | up        | -                                                                                         |
| c52279.graph_c0 | 9.20084667    | 9.09774212    | 7.06523366    | 0.57085191     | 0.883587       | 0.53235485     | 2.281E-45 | -4.7633  | down      | PREDICTED: 8-hydroxygeraniol dehydrogenase-like [Sesamum indicum]                         |
| c52290.graph_c0 | 0.49356867    | 0.39525032    | 1.01480845    | 4.23292981     | 2.72070215     | 3.16132123     | 0.0047321 | 1.30766  | up        | hypothetical protein MIMGU_mgv1a011/2/mg [Erythranthe guttata]                            |
| c52293.graph_c0 | 6.16745921    | 6.51661471    | 6.8246752     | 0.99610529     | 1.29287267     | 1.21922067     | 6.392E-32 | -3.56699 | down      | PREDICTED: putative calcium-binding protein CML23 [Sesamum indicum]                       |
| c52298.graph_c0 | 1.16670308    | 1.07803509    | 0.80729365    | 11.0233899     | 11.8965899     | 10.2191672     | 7.407E-12 | 2.35401  | up        | PREDICTED: LOW QUALITY PROTEIN: uncharacterized protein LOC105174495 [Sesamum indicum]    |
| c52301.graph_c0 | 0.28142714    | 0.28170895    | 0.09041125    | 7.31229154     | 8.12592451     | 6.92646049     | 2.423E-18 | 4.01742  | up        | hypothetical protein MIMGU_mgv1a015992mg [Erythranthe guttata]                            |
| c52307.graph_c0 | 3.54989601    | 3.95725191    | 4.25072804    | 3.16641759     | 1.80009739     | 2.67946611     | 4.62E-08  | -1.71263 | down      | PREDICTED: probable L-type lectin-domain containing receptor kinase S.7 [Sesamum indicum] |
| c52308.graph_c0 | 4.35129799    | 4.20009605    | 3.16191112    | 19.1444094     | 19.5631596     | 16.2361038     | 4.64E-13  | 1.14239  | up        | PREDICTED: cytochrome P450 703A2 [Sesamum indicum]                                        |
| c52310.graph_c0 | 8.72220717    | 4.91115439    | 5.90441527    | 0              | 0              | 0              | 8.23E-26  | -Inf     | down      | unknown [Picea sitchensis]                                                                |
| c52312.graph_c0 | 5.99810416    | 4.36662571    | 3.92397158    | 0.87187751     | 1.35974993     | 0.77612174     | 4.852E-17 | -3.33591 | down      | -                                                                                         |
| c52313.graph_c0 | 6.34669649    | 6.47464125    | 5.3851405     | 28.3606413     | 29.6323805     | 24.6908582     | 8.825E-18 | 1.094    | up        | PREDICTED: LRR receptor-like serine/threonine-protein kinase GSO1 [Sesamum indicum]       |
| c52320.graph_c0 | 1.44784459    | 1.44929438    | 0.37210752    | 14.3110774     | 15.5058733     | 13.7041506     | 4.104E-24 | 2.65694  | up        | PREDICTED: coatomer subunit alpha-1-like [Nicotiana sylvestris]                           |
| c52321.graph_c0 | 0.16629621    | 0.33292547    | 0.42739444    | 3.86762014     | 3.38297029     | 2.86007647     | 1.269E-05 | 2.34656  | up        | -                                                                                         |
| c52322.graph_c0 | 0             | 0             | 0             | 17.7332773     | 15.2109124     | 17.9430597     | 3.834E-80 | Inf      | up        | hypothetical protein MIMGU_mgv1a018712mg, partial [Erythranthe guttata]                   |

| #ID             | 0 h-1<br>FPKM | 0 h-2<br>FPKM | 0 h-3<br>FPKM | 28 h-1<br>FPKM | 28 h-2<br>FPKM | 28 h-3<br>FPKM | FDR       | log2FC   | regulated | nr_annotation                                                                                                                     |
|-----------------|---------------|---------------|---------------|----------------|----------------|----------------|-----------|----------|-----------|-----------------------------------------------------------------------------------------------------------------------------------|
| c52323.graph_c0 | 97.8367903    | 87.5534244    | 108.864589    | 10.8068437     | 7.70765767     | 12.375256      | 1.819E-58 | -4.3425  | down      | PREDICTED: putative derensin-like protein 120 [Sesamum indicum]                                                                   |
| c52324.graph_c0 | 3.55532983    | 2.41086094    | 2.35805914    | 14.7120905     | 13.0578541     | 13.0592044     | 2.928E-08 | 1.20804  | up        | PREDICTED: uncharacterized protein LOC105157576 isoform X2 [Sesamum indicum]                                                      |
| c52327.graph_c0 | 42.8914015    | 45.0568116    | 39.4175844    | 40.1406619     | 41.0138471     | 40.083785      | 1.547E-47 | -1.16051 | down      | PREDICTED: F-box/keich-repeat protein At5g60570 [Sesamum indicum]                                                                 |
| c52334.graph_c0 | 2.39493683    | 1.71238214    | 1.86853596    | 0              | 0              | 0              | 7.56E-30  | -Inf     | down      | Serpin-ZX [Aegilops tauschii]                                                                                                     |
| c52338.graph_c0 | 9.35784155    | 10.6363182    | 10.9390501    | 5.92364785     | 5.66544668     | 4.61881946     | 3.056E-29 | -2.0257  | down      | unnamed protein product [Coffea canephora]                                                                                        |
| c52343.graph_c0 | 4.27145965    | 3.39110166    | 5.48899476    | 36.8789894     | 38.5660656     | 37.2121872     | 1.964E-35 | 2.00367  | up        | PREDICTED: uncharacterized protein LOC105158873 [Sesamum indicum]                                                                 |
| c52347.graph_c0 | 1.47105848    | 1.32527837    | 1.41777629    | 11.5468937     | 14.8663649     | 13.0427274     | 2.052E-14 | 2.13631  | up        | PREDICTED: LIM domain-containing protein WLIM1 [Sesamum indicum]                                                                  |
| c52349.graph_c0 | 7.56385219    | 8.29251445    | 9.25699955    | 7.59159815     | 7.48480032     | 7.47634046     | 1.746E-06 | -1.24818 | down      | -                                                                                                                                 |
| c52357.graph_c0 | 50.7529527    | 54.7072751    | 44.6514604    | 8.07959647     | 7.8680331      | 6.73095562     | 1.86E-113 | -3.81608 | down      | hypothetical protein MIMGU_mgv1a001601mg [Erythranthe outtata]                                                                    |
| c52362.graph_c0 | 16.5844453    | 13.7952405    | 19.8108471    | 14.4302217     | 12.5692853     | 14.4069891     | 5.07E-06  | -1.37074 | down      | -                                                                                                                                 |
| c52365.graph_c0 | 1.3776527     | 0.82741933    | 1.06220296    | 7.2091443      | 13.7416051     | 8.00687614     | 0.0021685 | 2.05778  | up        | zinc finger family protein [Populus trichocarpa]                                                                                  |
| c52366.graph_c0 | 0.27867893    | 0.092986      | 0.11937115    | 4.38841526     | 2.86506759     | 4.95818448     | 1.245E-07 | 3.55736  | up        | PREDICTED: myosin-9-like [Sesamum indicum]                                                                                        |
| c52371.graph_c0 | 1003.62253    | 984.370931    | 1005.92888    | 44.4816353     | 37.8307157     | 49.8786238     | 0         | -5.59089 | down      | hypothetical protein MIMGU_mgv1a015982mg [Erythranthe outtata]                                                                    |
| c52372.graph_c0 | 0.36126166    | 0.28929873    | 0.37138843    | 6.59032867     | 7.58622966     | 5.44192913     | 2.404E-21 | 3.1699   | up        | PREDICTED: ATP synthase gamma chain, chloroplastic-like [Sesamum indicum]                                                         |
| c52377.graph_c0 | 0.08936731    | 0.0447284     | 0             | 8.83342357     | 7.68252705     | 8.48000176     | 7.8E-40   | 6.47601  | up        | PREDICTED: uncharacterized protein LOC105168503 isoform X2 [Sesamum indicum]                                                      |
| c52380.graph_c0 | 4.44109999    | 3.27065249    | 3.95412831    | 18.4674319     | 19.2556586     | 17.8159827     | 1.239E-17 | 1.16114  | up        | PREDICTED: LOW QUALITY PROTEIN: ATP-dependent Clp protease ATP-binding subunit clpA homolog CD4B, chloroplastic [Sesamum indicum] |
| c52381.graph_c0 | 33.0319057    | 35.7936458    | 31.3203428    | 16.8984117     | 15.2576814     | 11.1262691     | 7.915E-44 | -2.30142 | down      | PREDICTED: importin subunit beta-1-like [Nicotiana sylvestris]                                                                    |
| c52383.graph_c0 | 12.6465586    | 7.46286027    | 7.80631501    | 0              | 0              | 0              | 9.249E-30 | -Inf     | down      | -                                                                                                                                 |
| c52389.graph_c0 | 0             | 0             | 0             | 3.67988321     | 4.8177548      | 2.47727258     | 3.834E-08 | Inf      | up        | hypothetical protein MIMGU_mgv1a020102mg [Erythranthe outtata]                                                                    |
| c52394.graph_c0 | 0.37777545    | 0.07563075    | 0             | 15.8149452     | 18.6425667     | 19.4021078     | 3.772E-47 | 5.82998  | up        | PREDICTED: protein RALF-like 34 [Phoenix dactylifera]                                                                             |
| c52396.graph_c0 | 1.06671739    | 0.15254079    | 0.19582487    | 4.31943969     | 6.80008553     | 4.0668779      | 0.001143  | 2.35054  | up        | protein with unknown function [Ricinus communis]                                                                                  |
| c52400.graph_c0 | 2.93891524    | 2.52159268    | 2.87742663    | 2.64455491     | 3.76535348     | 2.32393023     | 0.0095016 | -1.02558 | down      | hypothetical protein MIMGU_mgv1a00505/mg [Erythranthe outtata]                                                                    |
| c52401.graph_c0 | 424.357015    | 410.235511    | 394.499635    | 80.3730243     | 80.1384078     | 85.2549863     | 0         | -3.41161 | down      | unnamed protein product [Coffea canephora]                                                                                        |
| c52403.graph_c0 | 0             | 0.09781862    | 0.12557506    | 8.87786168     | 12.1200056     | 11.3590038     | 3.587E-25 | 6.06932  | up        | PREDICTED: dirigent protein 22-like [Sesamum indicum]                                                                             |
| c52404.graph_c0 | 8.48318608    | 10.6789318    | 8.58884786    | 2.52226258     | 3.62691722     | 2.59173899     | 5.871E-22 | -2.75782 | down      | PREDICTED: cyclic pyranopterin monophosphate synthase, mitochondrial [Sesamum indicum]                                            |

| #ID             | 0 h-1<br>FPKM | 0 h-2<br>FPKM | 0 h-3<br>FPKM | 28 h-1<br>FPKM | 28 h-2<br>FPKM | 28 h-3<br>FPKM | FDR       | log2FC   | regulated | nr_annotation                                                                                     |
|-----------------|---------------|---------------|---------------|----------------|----------------|----------------|-----------|----------|-----------|---------------------------------------------------------------------------------------------------|
| c52410.graph_c0 | 4.0525019     | 4.59743452    | 5.3812129     | 2.74897936     | 1.50697145     | 2.96415551     | 2.141E-08 | -2.05041 | down      | -                                                                                                 |
| c52413.graph_c0 | 9.06071015    | 5.62952053    | 8.02991122    | 4.54156684     | 4.92073085     | 6.67058661     | 4.897E-05 | -1.58236 | down      | -                                                                                                 |
| c52415.graph_c0 | 0             | 0             | 0             | 35.3124145     | 29.7154568     | 25.2818122     | 1.416E-58 | Inf      | up        | PREDICTED: GDSL esterase/lipase 1-like [Sesamum indicum]                                          |
| c52418.graph_c0 | 0.07882468    | 0.15780722    | 0.20258567    | 1.43223307     | 1.81044105     | 2.1503905      | 7.878E-07 | 2.51908  | up        | PREDICTED: auxin response factor 4 isoform X2 [Sesamum indicum]                                   |
| c52420.graph_c0 | 0.17839682    | 0             | 0.22924698    | 2.85247121     | 3.04378934     | 2.06309398     | 8.822E-09 | 3.18619  | up        | flavonoid glycosyltransferase [Veronica persica]                                                  |
| c52421.graph_c0 | 2.96697983    | 2.90321035    | 2.69886801    | 14.7554804     | 15.2917044     | 15.2629744     | 9.697E-17 | 1.31331  | up        | PREDICTED: uncharacterized protein LOC105173356 [Sesamum indicum]                                 |
| c52437.graph_c0 | 0             | 0             | 0             | 9.60245161     | 10.098523      | 8.97632608     | 9.467E-45 | Inf      | up        | PREDICTED: probable LRR receptor-like serine/threonine-protein kinase At4g26540 [Sesamum indicum] |
| c52440.graph_c0 | 182.010223    | 202.337482    | 169.066375    | 45.5551751     | 56.0838727     | 50.3171526     | 4.212E-89 | -2.95422 | down      | hypothetical protein MIMGU_mgv1a009891mg [Erythranthe outtata]                                    |
| c52441.graph_c0 | 0             | 0             | 0             | 9.16868329     | 9.27586635     | 11.988541      | 2.269E-19 | Inf      | up        | -                                                                                                 |
| c52442.graph_c0 | 4.62906739    | 4.75564225    | 3.28734822    | 3.2758432      | 2.07843949     | 3.1787756      | 1.131E-06 | -1.65549 | down      | PREDICTED: mitoferrin-like [Sesamum indicum]                                                      |
| c52443.graph_c0 | 0.26852745    | 0.57599215    | 0.19718194    | 2.98322421     | 2.8949603      | 2.63903967     | 1.636E-06 | 1.94579  | up        | PREDICTED: cinnamoyl-CoA reductase 1-like [Sesamum indicum]                                       |
| c52446.graph_c0 | 0.21005617    | 0.77097719    | 0.26993049    | 14.8596475     | 14.7953139     | 12.9558545     | 1.624E-31 | 4.00098  | up        | PREDICTED: vegetative incompatibility protein HET-E-1-like [Sesamum indicum]                      |
| c52447.graph_c0 | 1.99797913    | 2.41858023    | 3.34369787    | 2.39768605     | 1.18916257     | 1.73604241     | 0.0011288 | -1.64045 | down      | ATPase subunit 1 [Silene latifolia]                                                               |
| c52451.graph_c0 | 4.83638833    | 6.0098043     | 6.64356776    | 4.12110385     | 3.72097038     | 3.26388158     | 9.08E-07  | -1.75003 | down      | PREDICTED: calcium uniporter protein 2, mitochondrial-like [Sesamum indicum]                      |
| c52454.graph_c0 | 2.04273284    | 1.61429868    | 1.42762754    | 0.07813929     | 0              | 0.06376102     | 4.942E-39 | -6.24563 | down      | PREDICTED: cytochrome P450 86B1-like [Sesamum indicum]                                            |
| c52455.graph_c0 | 2.37234374    | 3.26523901    | 1.90534727    | 20.0438919     | 24.9087382     | 18.2901916     | 1.237E-06 | 1.97953  | up        | -                                                                                                 |
| c52456.graph_c0 | 0.24203836    | 0.40380122    | 0             | 7.74013188     | 9.15931905     | 7.22498898     | 8.425E-18 | 4.14911  | up        | PREDICTED: uncharacterized protein LOC105159948 [Sesamum indicum]                                 |
| c52460.graph_c0 | 0             | 0             | 0             | 4.38126835     | 4.73292132     | 3.83044199     | 8.098E-15 | Inf      | up        | hypothetical protein MIMGU_mgv1a00115mg [Erythranthe outtata]                                     |
| c52461.graph_c0 | 63.6210898    | 64.2637493    | 82.8704685    | 56.3280467     | 46.6839569     | 55.0529686     | 1.371E-07 | -1.50875 | down      | PREDICTED: branchpoint-bridging protein [Sesamum indicum]                                         |
| c52465.graph_c0 | 12.6074591    | 9.96322383    | 11.0849522    | 7.39472482     | 7.11218296     | 9.18222727     | 1.51E-07  | -1.59484 | down      | -                                                                                                 |
| c52466.graph_c0 | 3.94576305    | 4.42846736    | 2.91935676    | 0              | 0              | 0              | 1.652E-35 | -Inf     | down      | -                                                                                                 |
| c52471.graph_c0 | 0.20585242    | 0.20605855    | 0.08817617    | 13.0162748     | 10.716817      | 13.4290705     | 1.373E-34 | 5.13522  | up        | PREDICTED: bidirectional sugar transporter SWEET14-like [Solanum tuberosum]                       |
| c52472.graph_c0 | 15.2130213    | 5.55625516    | 6.60450498    | 0              | 0              | 0              | 2.343E-08 | -Inf     | down      | RecName: Full=40S ribosomal protein S29 [Griffithsia japonica]                                    |
| c52482.graph_c0 | 50.727242     | 44.5804408    | 45.4768609    | 32.5218001     | 34.6275192     | 35.8006211     | 2.125E-56 | -1.54073 | down      | hypothetical protein MIMGU_mgv1a021140mg [Erythranthe outtata]                                    |
| c52484.graph_c0 | 55.6838217    | 43.5560657    | 44.5758162    | 7.2979916      | 5.79068675     | 12.9929488     | 4.487E-45 | -3.54759 | down      | histone H4 [Zea mays]                                                                             |
| c52487.graph_c0 | 0.07458826    | 0.07466295    | 0             | 2.65630547     | 4.01364026     | 3.58304917     | 4.215E-13 | 5.03182  | up        | PREDICTED: long chain acyl-CoA synthetase 4 [Sesamum indicum]                                     |

| #ID             | 0 h-1<br>FPKM | 0 h-2<br>FPKM | 0 h-3<br>FPKM | 28 h-1<br>FPKM | 28 h-2<br>FPKM | 28 h-3<br>FPKM | FDR       | log2FC   | regulated | nr_annotation                                                                    |
|-----------------|---------------|---------------|---------------|----------------|----------------|----------------|-----------|----------|-----------|----------------------------------------------------------------------------------|
| c52489.graph_c0 | 1.45229415    | 0.79295367    | 0.67863835    | 8.82797722     | 10.6566608     | 8.61294897     | 2.031E-07 | 2.18184  | up        | hypothetical protein MIMGU_mgv1a012466mg [Erythranthe outafata]                  |
| c52491.graph_c0 | 18.5394591    | 14.7184325    | 16.9779795    | 6.96950278     | 5.59360672     | 7.45636409     | 3.021E-19 | -2.41626 | down      | PREDICTED: cation/calcium exchanger 3-like [Sesamum indicum]                     |
| c52493.graph_c0 | 9.41343717    | 8.61749037    | 8.0644263     | 7.6018132      | 10.1899911     | 6.29844853     | 3.504E-09 | -1.20593 | down      | PREDICTED: E3 ubiquitin-protein ligase RHA2A-like [Sesamum indicum]              |
| c52496.graph_c0 | 5.86007934    | 6.00396962    | 5.13841377    | 2.25480277     | 2.08111717     | 1.92167401     | 7.492E-22 | -2.53132 | down      | -                                                                                |
| c52500.graph_c0 | 7.01101327    | 5.48846228    | 5.54426438    | 0              | 0              | 0              | 4.698E-61 | -Inf     | down      | -                                                                                |
| c52505.graph_c0 | 8.59357281    | 10.6667007    | 11.0430813    | 10.9925362     | 8.79736253     | 9.1736793      | 0.0014336 | -1.15858 | down      | PREDICTED: UDP-glycosyltransferase /5C5-like [Sesamum indicum]                   |
| c52508.graph_c0 | 0.30598701    | 0             | 0             | 7.63537613     | 6.2916379      | 6.65383013     | 9.524E-16 | 5.01276  | up        | hypothetical protein MIMGU_mgv1a018889mg [Erythranthe outafata]                  |
| c52510.graph_c0 | 18.9334696    | 18.3259021    | 13.6732029    | 16.4901389     | 16.8400282     | 14.3838062     | 2.992E-09 | -1.18139 | down      | PREDICTED: zinc-finger nomeodomain protein 1-like [Sesamum indicum]              |
| c52513.graph_c0 | 27.9032811    | 33.2602052    | 29.4875173    | 7.87182033     | 7.83031391     | 9.253966       | 7.4E-50   | -2.95084 | down      | PREDICTED: cyclin-dependent protein kinase inhibitor SMR3-like [Sesamum indicum] |
| c52518.graph_c0 | 0             | 0             | 0             | 25.9645351     | 23.3095777     | 23.7292704     | 1.017E-29 | Inf      | up        | PREDICTED: protein YLS9 [Sesamum indicum]                                        |
| c52520.graph_c0 | 11.2256034    | 9.39473856    | 8.86803986    | 9.09494857     | 10.8686724     | 8.34907924     | 1.707E-08 | -1.14758 | down      | unnamed protein product [Coffea canephora]                                       |
| c52522.graph_c0 | 21.8215658    | 12.1088506    | 16.6115858    | 0              | 0              | 0              | 1.021E-30 | -Inf     | down      | --                                                                               |
| c52528.graph_c0 | 1.78100202    | 2.30276451    | 1.90721509    | 0.862948       | 0.68176599     | 1.18826751     | 1.105E-08 | -2.22057 | down      | -                                                                                |
| c52531.graph_c0 | 53.8185969    | 32.4843062    | 33.0999924    | 0              | 0              | 0              | 1.059E-41 | -Inf     | down      | uncharacterized protein LOC100191904 [Zea mays]                                  |
| c52533.graph_c0 | 0             | 0             | 0             | 12.6878378     | 21.0641256     | 14.1382027     | 2.431E-14 | Inf      | up        | -                                                                                |
| c52540.graph_c0 | 0.71427591    | 0.35749557    | 0.65562345    | 26.3644699     | 21.9966967     | 23.9035468     | 1.967E-73 | 4.29572  | up        | PREDICTED: flavonol synthase/flavanone 3-hydroxylase-like [Sesamum indicum]      |
| c52546.graph_c0 | 17.3418837    | 13.403977     | 16.3611445    | 6.38176258     | 5.61807993     | 6.11877273     | 2.222E-18 | -2.46871 | down      | -                                                                                |
| c52548.graph_c0 | 0.17373099    | 2.26076447    | 1.56275844    | 14.6469355     | 11.1726838     | 11.9517797     | 2.212E-07 | 2.14024  | up        | -                                                                                |
| c52555.graph_c0 | 0.47528673    | 0.88355922    | 0.43625876    | 4.44131559     | 5.83691105     | 5.83879112     | 1.568E-07 | 2.07918  | up        | PREDICTED: regulatory protein NPR5-like [Sesamum indicum]                        |
| c52558.graph_c0 | 2.28589468    | 2.37971101    | 2.58496935    | 67.8505583     | 74.4632727     | 77.1104242     | 6.76E-114 | 3.8277   | up        | eukaryotic translation initiation factor 5A [Quercus suber]                      |
| c52562.graph_c0 | 1.23367469    | 1.67594933    | 1.35884642    | 19.7258085     | 18.5622998     | 17.5593803     | 3.18E-21  | 2.61854  | up        | hypothetical protein MIMGU_mgv1a012628mg [Erythranthe outafata]                  |
| c52564.graph_c0 | 19.8700416    | 10.659967     | 12.572193     | 0              | 0              | 0              | 1.322E-29 | -Inf     | down      | --                                                                               |
| c52571.graph_c0 | 40.9594764    | 46.2112559    | 39.2558675    | 12.5448429     | 11.6863985     | 11.780087      | 6.251E-89 | -2.90149 | down      | PREDICTED: uncharacterized protein LOC105157856 [Sesamum indicum]                |
| c52573.graph_c0 | 0.63465124    | 0.4235245     | 0.54370132    | 6.45765212     | 4.02592804     | 4.0147744      | 4.812E-05 | 2.08785  | up        | PREDICTED: microtubule-associated protein /0-2 [Sesamum indicum]                 |
| c52577.graph_c0 | 0             | 0.41234525    | 0.17644997    | 3.19349714     | 3.7844999      | 2.68730095     | 1.302E-07 | 2.93924  | up        | hypothetical protein MIMGU_mgv1a001002mg [Erythranthe outafata]                  |
| c52580.graph_c0 | 0.08629323    | 0.25913891    | 0.11089021    | 5.95815487     | 9.79663529     | 7.21594322     | 3.423E-12 | 4.56337  | up        | hypothetical protein POPTR_0001s10630g [Populus trichocarpa]                     |
| c52585.graph_c0 | 1.3827387     | 2.42221578    | 2.33214709    | 1.50744978     | 2.04162872     | 1.89635284     | 0.0040019 | -1.26771 | down      | hypothetical protein MIMGU_mgv1a01183mg [Erythranthe outafata]                   |



| #ID             | 0 h-1<br>FPKM | 0 h-2<br>FPKM | 0 h-3<br>FPKM | 28 h-1<br>FPKM | 28 h-2<br>FPKM | 28 h-3<br>FPKM | FDR       | log2FC   | regulated | nr_annotation                                                                             |
|-----------------|---------------|---------------|---------------|----------------|----------------|----------------|-----------|----------|-----------|-------------------------------------------------------------------------------------------|
| c52590.graph_c0 | 0.31192415    | 0.23417737    | 0.40083488    | 24.597457      | 27.6335636     | 24.7885477     | 4.909E-62 | 5.25042  | up        | PREDICTED: probable serine/threonine-protein kinase At4g35230 [Sesamum indicum]           |
| c52594.graph_c0 | 7.97435889    | 6.44030028    | 6.98684106    | 32.6009142     | 31.6655362     | 29.7459619     | 5.958E-17 | 1.04547  | up        | PREDICTED: GDP-mannose transporter GONS14 [Sesamum indicum]                               |
| c52596.graph_c0 | 6.16315085    | 3.50677268    | 4.41846653    | 0              | 0              | 0              | 8.93E-27  | -Inf     | down      | transcriptionally-controlled tumor protein 1 [Liliaceae anomala UBC0511]                  |
| c52599.graph_c0 | 2.03440068    | 0.29091969    | 0.74693869    | 16.0532703     | 13.541006      | 8.27326578     | 0.0002228 | 2.54259  | up        | -                                                                                         |
| c52600.graph_c0 | 0             | 0             | 0             | 3.00969378     | 3.22411849     | 2.62238626     | 4.508E-15 | Inf      | up        | PREDICTED: LOW QUALITY PROTEIN: protein E6-like [Sesamum indicum]                         |
| c52601.graph_c0 | 21.3518917    | 28.1342055    | 21.2784693    | 3.95878364     | 2.00166985     | 3.23033512     | 4.056E-33 | -4.03345 | down      | -                                                                                         |
| c52604.graph_c0 | 14.8941634    | 13.0454429    | 15.949658     | 0.06443448     | 0.11635658     | 0.26289003     | 2.88E-103 | -7.71481 | down      | -                                                                                         |
| c52605.graph_c0 | 15.6961061    | 17.2067917    | 15.804943     | 16.0263118     | 14.7200754     | 14.883506      | 2.883E-32 | -1.18462 | down      | PREDICTED: inositol-tetrakisphosphate 1-kinase 1-like [Sesamum indicum]                   |
| c52610.graph_c0 | 113.926978    | 111.547765    | 102.007316    | 44.0374743     | 46.7972945     | 45.0863665     | 1.5E-175  | -2.35789 | down      | PREDICTED: cysteine proteinase inhibitor 1-like [Sesamum indicum]                         |
| c52621.graph_c0 | 7.67071966    | 5.04975904    | 5.50581139    | 0              | 0              | 0              | 1.218E-40 | -Inf     | down      | -                                                                                         |
| c52622.graph_c0 | 21.3740828    | 19.0840621    | 19.097236     | 0.12909607     | 0.11656165     | 0.1755689      | 2.2E-261  | -8.23096 | down      | PREDICTED: LOW QUALITY PROTEIN: EID1-like F-box protein 3 [Sesamum indicum]               |
| c52631.graph_c0 | 28.0337786    | 25.6098439    | 22.5007491    | 14.3085086     | 13.4550628     | 16.1952234     | 2.441E-42 | -1.87968 | down      | hypothetical protein MIMGU_mgv1a017584mg [Erythranthe outtata]                            |
| c52635.graph_c0 | 5.01279177    | 4.54605129    | 4.95510453    | 4.67085663     | 4.97646781     | 4.90397671     | 7.407E-08 | -1.08694 | down      | PREDICTED: thioredoxin-like protein CDSP32, chloroplastic [Sesamum indicum]               |
| c52638.graph_c0 | 0.7246657     | 0.45336959    | 0.34920904    | 23.1082103     | 21.8750809     | 20.6826287     | 1.048E-39 | 4.34357  | up        | hypothetical protein MIMGU_mgv1a016092mg [Erythranthe outtata]                            |
| c52657.graph_c0 | 21.5617086    | 17.7228719    | 15.5433154    | 78.8642514     | 76.383626      | 90.2391663     | 1.279E-10 | 1.07668  | up        | PREDICTED: 60S ribosomal protein L23A-like isoform X1 [Musa acuminata subsp. malaccensis] |
| c52662.graph_c0 | 5.31967927    | 4.56429096    | 4.29691333    | 0              | 0              | 0              | 6.5E-35   | -Inf     | down      | hypothetical protein M569_00609, partial [Genlisea aurea]                                 |
| c52666.graph_c0 | 3.21245743    | 4.56418277    | 4.12813499    | 0.5272119      | 0.20400982     | 0.4302006      | 2.672E-25 | -4.44865 | down      | -                                                                                         |
| c52667.graph_c0 | 1.04980163    | 1.40113713    | 0.44967888    | 35.8605193     | 39.497405      | 40.4685725     | 7.165E-20 | 4.23859  | up        | PIP2;1 [Karelinia caspia]                                                                 |
| c52673.graph_c0 | 1.21000952    | 0.69878144    | 0.47843389    | 16.2017687     | 19.1791437     | 15.0697265     | 2.383E-34 | 3.32046  | up        | PREDICTED: uncharacterized protein LOC105176754 [Sesamum indicum]                         |
| c52674.graph_c0 | 2819.40896    | 2596.66673    | 2878.14897    | 122.509356     | 129.244267     | 147.319251     | 0         | -5.46773 | down      | hypothetical protein PHAVU_005G056100g [Phaseolus vulgaris]                               |
| c52675.graph_c0 | 98.5272191    | 84.2259575    | 90.8602309    | 29.5905021     | 27.8752051     | 31.5502612     | 4.059E-96 | -2.70938 | down      | PREDICTED: uncharacterized protein LOC102593371 [Solanum tuberosum]                       |
| c52676.graph_c0 | 25.7252892    | 24.7461302    | 22.5762054    | 26.540608      | 24.7871748     | 23.4430571     | 2.71E-12  | -1.05566 | down      | PREDICTED: zinc finger protein NUTCRACKER-like [Sesamum indicum]                          |
| c52679.graph_c0 | 43.5058974    | 55.9921654    | 58.3270085    | 17.5665753     | 29.332496      | 25.9132225     | 1.228E-12 | -2.20964 | down      | PREDICTED: transcription factor TGA5-like [Sesamum indicum]                               |
| c52682.graph_c0 | 5.57455068    | 6.07249741    | 8.0062852     | 48.737779      | 45.4043572     | 42.2005361     | 3.551E-16 | 1.69865  | up        | PREDICTED: uncharacterized protein At2g34160-like [Sesamum indicum]                       |

| #ID             | 0 h-1<br>FPKM | 0 h-2<br>FPKM | 0 h-3<br>FPKM | 28 h-1<br>FPKM | 28 h-2<br>FPKM | 28 h-3<br>FPKM | FDR       | log2FC   | regulated | nr_annotation                                                                                     |
|-----------------|---------------|---------------|---------------|----------------|----------------|----------------|-----------|----------|-----------|---------------------------------------------------------------------------------------------------|
| c52686.graph_c0 | 1.00870062    | 0.72122191    | 0.55552296    | 7.95956463     | 6.99761583     | 5.29850347     | 1.024E-05 | 2.06267  | up        | -                                                                                                 |
| c52687.graph_c0 | 7.90859801    | 8.05788365    | 6.71474781    | 2.617358       | 1.39013463     | 2.68014777     | 3.735E-32 | -2.84835 | down      | -                                                                                                 |
| c52691.graph_c0 | 20.2010636    | 16.9915023    | 18.387743     | 1.83525208     | 0.4602946      | 0.91516988     | 1.633E-80 | -5.20324 | down      | RNA recognition motif containing protein [Zea mays]                                               |
| c52692.graph_c0 | 49.4771286    | 46.7136256    | 53.7311771    | 33.0507323     | 36.2124151     | 29.090295      | 1.563E-29 | -1.70092 | down      | PREDICTED: universal stress protein A-like protein [Sesamum indicum]                              |
| c52694.graph_c0 | 0.22836289    | 0.22859156    | 0.58691071    | 18.4229843     | 20.3057462     | 18.2833842     | 5.975E-31 | 4.66662  | up        | PREDICTED: expansin-A10-like isoform X2 [Camelina sativa]                                         |
| c52698.graph_c0 | 0.82270269    | 0.8235265     | 0.70480369    | 4.7834846      | 6.83847698     | 5.85492655     | 0.0001508 | 1.80527  | up        | -                                                                                                 |
| c52700.graph_c0 | 10.0736203    | 6.09223998    | 8.22546936    | 0              | 0              | 0              | 1.828E-33 | -Inf     | down      | PREDICTED: 60S ribosomal protein L18-3 [Nelumbo nucifera]                                         |
| c52718.graph_c0 | 0.70641293    | 0.23570677    | 0             | 5.13416847     | 7.26255398     | 6.28415932     | 7.038E-09 | 3.24464  | up        | hypothetical protein M569_04419, partial [Genlisea aurea]                                         |
| c52719.graph_c0 | 9.83682169    | 8.11685106    | 8.37019677    | 5.60354092     | 7.24027899     | 6.5433245      | 1.159E-08 | -1.5303  | down      | -                                                                                                 |
| c52726.graph_c0 | 9.46555246    | 8.79824286    | 6.95063409    | 4.00134706     | 3.86637395     | 2.46312036     | 3.909E-21 | -2.37608 | down      | -                                                                                                 |
| c52732.graph_c0 | 10.5895353    | 9.6783879     | 10.0580664    | 6.69253325     | 3.92777452     | 5.18799985     | 3.219E-07 | -2.02962 | down      | -                                                                                                 |
| c52734.graph_c0 | 5.56920824    | 5.95925289    | 4.68884167    | 0.5582991      | 0.25204587     | 1.02502688     | 1.173E-20 | -4.22623 | down      | -                                                                                                 |
| c52737.graph_c0 | 0.87150579    | 0.87237847    | 1.67987916    | 11.5596482     | 10.2943021     | 9.43257855     | 2.822E-06 | 2.09131  | up        | PREDICTED: serine/threonine-protein kinase At5g01020 [Sesamum indicum]                            |
| c52739.graph_c0 | 0.81088562    | 1.6233952     | 1.56303019    | 7.8088477      | 6.38550097     | 8.41579088     | 0.0013387 | 1.40458  | up        | -                                                                                                 |
| c52742.graph_c0 | 0             | 0             | 0             | 1.68853995     | 2.26734382     | 1.34250571     | 7.97E-11  | Inf      | up        | PREDICTED: palmitoyl-protein thioesterase 1-like [Sesamum indicum]                                |
| c52743.graph_c0 | 8.30412485    | 4.64201204    | 4.85051327    | 0              | 0              | 0              | 2.535E-19 | -Inf     | down      | -                                                                                                 |
| c52746.graph_c0 | 4.23704957    | 2.5447754     | 3.42243091    | 0.08798466     | 0.63553521     | 0.35897383     | 4.34E-16  | -4.32696 | down      | -                                                                                                 |
| c52747.graph_c0 | 25.4571872    | 29.4920563    | 25.6362928    | 14.8352989     | 16.1496808     | 15.5544033     | 1.27E-45  | -1.88232 | down      | hypothetical protein MIMGU_mgv1a022555mg [Erythranthe outifata]                                   |
| c52748.graph_c0 | 45.7607402    | 49.9707956    | 49.6400466    | 5.32714183     | 6.10988517     | 8.75255041     | 1.74E-165 | -3.93737 | down      | PREDICTED: pentatricopeptide repeat-containing protein At3g57430, chloroplastic [Sesamum indicum] |
| c52749.graph_c0 | 7.20043393    | 4.67522859    | 4.00122926    | 0              | 0              | 0              | 1.051E-18 | -Inf     | down      | -                                                                                                 |
| c52753.graph_c0 | 8.49020982    | 11.1488473    | 8.44664962    | 1.92417668     | 2.51616371     | 2.65294864     | 1.779E-24 | -3.07431 | down      | -                                                                                                 |
| c52756.graph_c0 | 0.52466773    | 0.21007724    | 0.13484376    | 4.42337556     | 5.16451733     | 5.04076733     | 1.106E-08 | 2.99676  | up        | PREDICTED: WUSCHEL-related homeobox 11-like [Sesamum indicum]                                     |
| c52758.graph_c0 | 24.5720259    | 24.5055324    | 21.0506841    | 18.3879566     | 24.5455717     | 21.6970425     | 2.729E-19 | -1.20653 | down      | PREDICTED: auxin-induced protein X15-like [Sesamum indicum]                                       |
| c52760.graph_c0 | 50.8722032    | 51.144549     | 47.4663339    | 33.1155068     | 23.8040409     | 25.1855377     | 1.143E-36 | -1.95432 | down      | hypothetical protein MIMGU_mgv1a001181mg [Erythranthe outifata]                                   |
| c52761.graph_c0 | 1.29663561    | 0.353982      | 0             | 36.4960895     | 35.8919761     | 35.5129098     | 3.718E-54 | 4.96668  | up        | PREDICTED: callose synthase 3-like [Cucumis sativus]                                              |
| c52765.graph_c0 | 0             | 0             | 0             | 4.07147866     | 5.09007253     | 4.08897642     | 2.379E-10 | Inf      | up        | PREDICTED: transcription factor HEC2-like [Sesamum indicum]                                       |
| c52769.graph_c0 | 0.86678195    | 1.12794487    | 1.67077368    | 10.8985178     | 12.1155627     | 11.1035256     | 1.298E-11 | 2.11946  | up        | PREDICTED: uncharacterized protein LOC105168965 [Sesamum indicum]                                 |
| c52771.graph_c0 | 0.17157045    | 0.17174225    | 0.11023741    | 2.68097285     | 1.85772128     | 2.0859007      | 1.285E-07 | 2.78333  | up        | PREDICTED: CASP-like protein 2C1 isoform X2 [Sesamum indicum]                                     |

| #ID             | 0 h-1<br>FPKM | 0 h-2<br>FPKM | 0 h-3<br>FPKM | 28 h-1<br>FPKM | 28 h-2<br>FPKM | 28 h-3<br>FPKM | FDR       | log2FC   | regulated | nr_annotation                                                                              |
|-----------------|---------------|---------------|---------------|----------------|----------------|----------------|-----------|----------|-----------|--------------------------------------------------------------------------------------------|
| c52778.graph_c0 | 0.17018039    | 0.5110524     | 0             | 41.4348526     | 51.929794      | 38.1503568     | 4.945E-38 | 6.5157   | up        | PREDICTED: uncharacterized protein LOC104588233 isoform X2 [Nelumbo nucifera]              |
| c52779.graph_c0 | 4.50510001    | 5.26121306    | 5.54801389    | 0              | 0              | 0              | 6.531E-32 | -Inf     | down      | -                                                                                          |
| c52787.graph_c0 | 3.51001911    | 4.99291654    | 4.74790897    | 0.1342664      | 0.36368992     | 0.43824115     | 9.07E-22  | -4.91419 | down      | -                                                                                          |
| c52791.graph_c0 | 96.25799      | 99.4209325    | 98.4175559    | 23.7886595     | 24.44154       | 30.6947978     | 6.25E-158 | -2.98731 | down      | hypothetical protein MIMGU_mgv1a018283mg [Erythranthe outtata]                             |
| c52792.graph_c0 | 8.1125241     | 6.49651806    | 5.21245733    | 39.7006475     | 41.8794412     | 46.0271336     | 9.42E-09  | 1.60173  | up        | -                                                                                          |
| c52797.graph_c0 | 5.96555068    | 3.44121738    | 3.11836019    | 2.71901577     | 2.85312706     | 2.87830659     | 0.0018333 | -1.6508  | down      | uncharacterized protein [Arabidopsis thaliana]                                             |
| c52799.graph_c0 | 28.4638294    | 29.7728858    | 26.0971784    | 5.57861047     | 7.24063317     | 7.77650517     | 1.336E-57 | -3.12231 | down      | PREDICTED: uncharacterized protein LOC105178281 [Sesamum indicum]                          |
| c52801.graph_c0 | 85.7546789    | 77.8276281    | 75.5081715    | 75.6948419     | 70.5247961     | 72.7762415     | 1.411E-43 | -1.21573 | down      | PREDICTED: UPF0369 protein C6orf57 homolog [Nicotiana tomentosiformis]                     |
| c52803.graph_c0 | 203.439453    | 244.526075    | 194.231766    | 47.1259352     | 61.4775996     | 47.4640629     | 4.423E-45 | -3.13113 | down      | PREDICTED: probable CCR4-associated factor 1 homolog 11 [Sesamum indicum]                  |
| c52805.graph_c0 | 10.4744979    | 11.1140857    | 9.82590545    | 5.70960351     | 6.87364885     | 4.28627065     | 6.272E-18 | -1.98845 | down      | PREDICTED: dnaJ protein ERDJ3A [Sesamum indicum]                                           |
| c52817.graph_c0 | 1.05714778    | 2.11641271    | 0.67923838    | 33.9985544     | 45.6126798     | 37.7737447     | 3.012E-23 | 3.84452  | up        | -                                                                                          |
| c52828.graph_c0 | 0             | 0             | 0             | 6.93892612     | 7.18486204     | 14.0254028     | 8.321E-09 | Inf      | up        | cytochrome c oxidase subunit 3 (mitochondrion) [Microbotryum lychnidis-dioicae]            |
| c52831.graph_c0 | 0             | 0             | 0             | 4.37604223     | 3.73164718     | 5.65378998     | 7.128E-14 | Inf      | up        | -                                                                                          |
| c52832.graph_c0 | 68.4917306    | 67.576749     | 56.2996251    | 27.515193      | 30.8743856     | 29.8905263     | 5.058E-57 | -2.21174 | down      | PREDICTED: acidic leucine-rich nuclear phosphoprotein 32-related protein [Sesamum indicum] |
| c52837.graph_c0 | 0.08503434    | 0             | 0             | 3.21372816     | 3.57131719     | 3.47969115     | 2.112E-13 | 5.85657  | up        | hypothetical protein CISIN_1g041913mg [Citrus sinensis]                                    |
| c52838.graph_c0 | 1.62089096    | 1.62251403    | 1.92268528    | 9.3338141      | 10.0639782     | 8.35576424     | 0.0002335 | 1.33187  | up        | -                                                                                          |
| c52840.graph_c0 | 6.19315683    | 5.36160722    | 5.05469231    | 3.04131804     | 2.91078654     | 2.38242305     | 6.776E-14 | -2.08405 | down      | hypothetical protein MIMGU_mgv1a013481mg [Erythranthe outtata]                             |
| c52846.graph_c0 | 0             | 0             | 0             | 5.47780266     | 4.62684916     | 4.32565378     | 1E-14     | Inf      | up        | PREDICTED: ethylene-responsive transcription factor CRF4-like [Sesamum indicum]            |
| c52849.graph_c0 | 8.79298705    | 4.28805246    | 6.08425811    | 0              | 0              | 0              | 3.049E-15 | -Inf     | down      | unknown [Picea sitchensis]                                                                 |
| c52852.graph_c0 | 1.10882214    | 1.87540311    | 1.32661274    | 0              | 0.05018201     | 0              | 3.15E-20  | -7.52562 | down      | PREDICTED: uncharacterized protein LOC105504028 [Cucumis melo]                             |
| c52856.graph_c0 | 3.62546949    | 4.42296544    | 2.6206154     | 25.3615894     | 32.2669663     | 23.9200213     | 7.608E-11 | 1.84703  | up        | PREDICTED: protein transport protein SEC31 homolog B [Sesamum indicum]                     |
| c52858.graph_c0 | 0.46345301    | 1.62370983    | 2.97777736    | 19.3680114     | 20.0726068     | 18.8275396     | 4.463E-10 | 2.41548  | up        | PREDICTED: membrin-11 [Sesamum indicum]                                                    |
| c52861.graph_c0 | 119.662825    | 122.156934    | 119.786297    | 3.70636356     | 2.87954547     | 2.3210223      | 0         | -6.43517 | down      | PREDICTED: heat shock 70 kDa protein-like [Sesamum indicum]                                |
| c52869.graph_c0 | 143.492551    | 139.341466    | 131.097117    | 74.1460652     | 79.3039745     | 80.4345096     | 2.239E-75 | -1.91286 | down      | -                                                                                          |
| c52870.graph_c0 | 4.53542719    | 3.92088209    | 4.90098932    | 4.56990143     | 3.11155502     | 3.05655922     | 1.084E-05 | -1.40764 | down      | hypothetical protein M569_00403, partial [Genlisea aurea]                                  |

| #ID             | 0 h-1<br>FPKM | 0 h-2<br>FPKM | 0 h-3<br>FPKM | 28 h-1<br>FPKM | 28 h-2<br>FPKM | 28 h-3<br>FPKM | FDR       | log2FC   | regulated | nr_annotation                                                                                                  |
|-----------------|---------------|---------------|---------------|----------------|----------------|----------------|-----------|----------|-----------|----------------------------------------------------------------------------------------------------------------|
| c52872.graph_c0 | 79.3171032    | 94.7481216    | 82.9877765    | 64.7007245     | 62.5072098     | 60.8957473     | 1.327E-26 | -1.54131 | down      | -                                                                                                              |
| c52876.graph_c0 | 1.84647139    | 0.69312013    | 1.48299303    | 11.5747911     | 14.8433799     | 12.7301298     | 6.388E-07 | 2.19289  | up        | PREDICTED: muscle M-line assembly protein unc-89-like [Populus euphratica]                                     |
| c52879.graph_c0 | 0.07585005    | 0.075926      | 0             | 4.68582705     | 4.4299619      | 4.2734315      | 3.077E-15 | 5.3924   | up        | -                                                                                                              |
| c52880.graph_c0 | 3.23132494    | 3.00352058    | 1.48299303    | 52.1704353     | 65.1291157     | 52.4262335     | 2.354E-31 | 3.37644  | up        | hypothetical protein MIMGU_mgv1a011550mg [Erythranthe outtata]                                                 |
| c52881.graph_c0 | 4.86229399    | 4.05596903    | 3.27288776    | 22.7178466     | 19.90432       | 18.5375773     | 1.232E-06 | 1.24033  | up        | PREDICTED: uncharacterized protein LOC105170351 [Sesamum indicum]                                              |
| c52884.graph_c0 | 1.26417293    | 1.01235105    | 0.64980491    | 6.06403778     | 7.46626031     | 8.84679131     | 0.0001266 | 1.85317  | up        | -                                                                                                              |
| c52890.graph_c0 | 6.41122314    | 3.14333535    | 4.37154214    | 0              | 0              | 0              | 3.798E-16 | -Inf     | down      | 60S ribosomal protein L11 [Zea mays]                                                                           |
| c52894.graph_c0 | 23.5685791    | 21.3828784    | 20.9676166    | 13.6921481     | 15.6215199     | 19.166524      | 1.004E-29 | -1.53133 | down      | proliferating cell nuclear antigen [Nicotiana benthamiana]                                                     |
| c52898.graph_c0 | 0.40444411    | 0.50606138    | 0.5197267     | 16.2406077     | 14.5973943     | 14.7513213     | 2.839E-24 | 3.90111  | up        | PREDICTED: vegetative incompatibility protein HET-E-1-like [Sesamum indicum]                                   |
| c52903.graph_c0 | 1.4682682     | 1.11700122    | 1.43395491    | 0.76833278     | 0.57811039     | 1.25390655     | 1.658E-05 | -1.71578 | down      | -                                                                                                              |
| c52907.graph_c0 | 0.44285432    | 0.55412222    | 0.426814      | 39.1064721     | 34.5829453     | 32.0418811     | 1.213E-58 | 5.12458  | up        | -                                                                                                              |
| c52908.graph_c0 | 43.1549937    | 46.3629107    | 45.2991217    | 23.6097675     | 23.9626321     | 23.4371989     | 1.685E-80 | -2.01598 | down      | PREDICTED: transcription factor TCP9 [Sesamum indicum]                                                         |
| c52911.graph_c0 | 20.7480141    | 23.906521     | 18.6058698    | 19.8529157     | 23.0188555     | 20.1833787     | 5.798E-10 | -1.09386 | down      | -                                                                                                              |
| c52917.graph_c0 | 0.52372489    | 1.04849865    | 0.26920289    | 3.04512187     | 3.29935145     | 3.41659255     | 0.0056235 | 1.32405  | up        | PREDICTED: scarecrow-like protein 8 [Sesamum indicum]                                                          |
| c52924.graph_c0 | 5.7802941     | 5.40034338    | 4.20914717    | 2.94075911     | 3.54030633     | 3.6565873      | 5.17E-06  | -1.68848 | down      | PREDICTED: probable galacturonosyltransferase-like 1 [Sesamum indicum]                                         |
| c52927.graph_c0 | 1.03620904    | 0.86437221    | 0.44385655    | 16.3173998     | 12.3531227     | 17.4117465     | 3.372E-13 | 3.21708  | up        | unknown [Lotus japonicus]                                                                                      |
| c52930.graph_c0 | 2.16052922    | 1.73015413    | 3.88691182    | 22.1092634     | 20.3028634     | 19.7323201     | 6.064E-17 | 1.89804  | up        | PREDICTED: uncharacterized protein LOC105172794 [Sesamum indicum]                                              |
| c52932.graph_c0 | 34.0637966    | 22.0360619    | 20.5466638    | 0              | 0              | 0              | 1.296E-30 | -Inf     | down      | -                                                                                                              |
| c52935.graph_c0 | 0             | 0.04486597    | 0.17279063    | 1.23787703     | 1.82359442     | 1.59489087     | 1.718E-09 | 3.29863  | up        | PREDICTED: GDSL esterase/lipase At4g10955-like [Sesamum indicum]                                               |
| c52939.graph_c0 | 7.01848112    | 14.0510181    | 9.01902611    | 4.73663508     | 5.59265657     | 5.79758332     | 0.0008213 | -1.99048 | down      | -                                                                                                              |
| c52943.graph_c0 | 46.0578735    | 46.9473593    | 46.1941003    | 18.1660923     | 12.9006682     | 21.1524678     | 3.021E-39 | -2.50321 | down      | -                                                                                                              |
| c52952.graph_c0 | 6.42665612    | 7.07640059    | 4.78993438    | 34.5643391     | 35.1726623     | 35.8269801     | 5.717E-12 | 1.44223  | up        | unnamed protein product [Coffea canephora]                                                                     |
| c52953.graph_c0 | 0             | 0             | 0             | 11.8204386     | 16.3325382     | 12.2759399     | 3.996E-17 | Inf      | up        | -                                                                                                              |
| c52955.graph_c0 | 1.04486402    | 1.34474181    | 1.34269163    | 5.31580803     | 5.77920202     | 6.99336367     | 0.0051405 | 1.18497  | up        | hypothetical protein POPTR_0005s25720g [Populus trichocarpa]                                                   |
| c52958.graph_c0 | 3.47695978    | 1.28226789    | 1.64611667    | 13.9651897     | 14.7708438     | 11.7210659     | 4.764E-05 | 1.57597  | up        | PREDICTED: phosphatidylinositol/phosphatidylcholine transfer protein SFH6-like isoform X2 [Populus euphratica] |
| c52960.graph_c0 | 5.29649341    | 5.18654059    | 4.66076994    | 27.2809619     | 28.5612055     | 30.4894335     | 1.433E-20 | 1.42262  | up        | hypothetical protein MIMGU_mgv1a007612mg [Erythranthe outtata]                                                 |

| #ID             | 0 h-1<br>FPKM | 0 h-2<br>FPKM | 0 h-3<br>FPKM | 28 h-1<br>FPKM | 28 h-2<br>FPKM | 28 h-3<br>FPKM | FDR       | log2FC   | regulated | nr_annotation                                                                   |
|-----------------|---------------|---------------|---------------|----------------|----------------|----------------|-----------|----------|-----------|---------------------------------------------------------------------------------|
| c52961.graph_c0 | 0.30799728    | 0.15415285    | 0.19789435    | 9.62557794     | 13.2386077     | 11.3249387     | 3.681E-16 | 4.60859  | up        | -                                                                               |
| c52974.graph_c0 | 0             | 0             | 0             | 29.8584455     | 27.5562634     | 31.5566456     | 2.677E-46 | Inf      | up        | -                                                                               |
| c52975.graph_c0 | 0.89836991    | 2.24817373    | 0.28861023    | 10.6101137     | 7.07441565     | 7.45899851     | 0.0040833 | 1.79143  | up        | -                                                                               |
| c52984.graph_c0 | 15.6017172    | 16.9514845    | 19.4443371    | 5.81207179     | 6.12238188     | 6.50945526     | 1.521E-25 | -2.58821 | down      | -                                                                               |
| c52991.graph_c0 | 17.3519715    | 14.9247722    | 13.5439524    | 8.40754193     | 8.51903811     | 9.52845217     | 2.77E-19  | -1.87957 | down      | hypothetical protein M569_07000 [Genlisea aurea]                                |
| c52992.graph_c0 | 6.13009916    | 6.68411587    | 8.29942476    | 1.75030457     | 2.15503762     | 2.59678953     | 8.539E-16 | -2.79237 | down      | -                                                                               |
| c53000.graph_c0 | 7.86357134    | 8.01370055    | 8.94840406    | 2.4788812      | 1.70973405     | 2.19130905     | 8.337E-55 | -3.05193 | down      | -                                                                               |
| c53001.graph_c0 | 1.25343881    | 1.25469393    | 1.38061585    | 5.72623605     | 8.81293341     | 7.64601031     | 0.0010355 | 1.42022  | up        | hypothetical protein MIMGU_mgv1a027115mg, partial [Erythranthe guttata]         |
| c53003.graph_c0 | 24.2430563    | 29.8225044    | 20.2684037    | 16.7705708     | 14.7589048     | 11.605968      | 7.562E-11 | -1.87415 | down      | -                                                                               |
| c53005.graph_c0 | 1.09056439    | 0.43666257    | 0.14014184    | 5.07274186     | 5.009605       | 4.26866956     | 2.74E-05  | 2.03375  | up        | -                                                                               |
| c53010.graph_c0 | 4.12118102    | 3.00022382    | 1.44433112    | 26.68496       | 28.7653059     | 24.8853822     | 3.454E-07 | 2.1497   | up        | -                                                                               |
| c53025.graph_c0 | 1.48396473    | 1.32040062    | 0.84753486    | 8.14894631     | 6.27571471     | 9.38749221     | 0.0002367 | 1.62258  | up        | PREDICTED: protein Brevis radix-like 2 [Sesamum indicum]                        |
| c53027.graph_c0 | 1.80885321    | 2.80652997    | 2.44067038    | 2.36639535     | 1.83987853     | 2.95007668     | 0.0045109 | -1.07063 | down      | -                                                                               |
| c53031.graph_c0 | 11.73195      | 13.0815874    | 15.2668559    | 8.31084747     | 8.08863677     | 6.60543863     | 1.883E-13 | -1.89572 | down      | -                                                                               |
| c53036.graph_c0 | 11.6687294    | 7.32680506    | 6.40686022    | 0              | 0              | 0              | 6.45E-23  | -Inf     | down      | hypothetical protein GUIHDRAFT_93413, partial [Guillardia theta CCMP2712]       |
| c53038.graph_c0 | 1.89370724    | 1.08067115    | 1.2736016     | 0              | 0              | 0              | 4.449E-26 | -Inf     | down      | predicted protein [Physcomitrella patens]                                       |
| c53039.graph_c0 | 0.18710993    | 0             | 0             | 6.52754013     | 9.45456808     | 7.32382673     | 1.397E-13 | 5.90102  | up        | PREDICTED: prenaspirodiene oxygenase-like [Sesamum indicum]                     |
| c53043.graph_c0 | 2.51894925    | 1.14612345    | 2.64841324    | 21.469796      | 18.1830291     | 14.1239886     | 2.688E-07 | 1.99582  | up        | hypothetical protein M569_02184 [Genlisea aurea]                                |
| c53045.graph_c0 | 12.2530294    | 12.0883956    | 9.46251678    | 5.65152362     | 8.46600237     | 5.93917812     | 1.548E-19 | -1.84157 | down      | PREDICTED: uncharacterized protein At1g16070 [Sesamum indicum]                  |
| c53051.graph_c0 | 30.1519528    | 30.4265353    | 30.7461734    | 6.74285094     | 5.36719562     | 9.26671377     | 2.848E-81 | -3.18341 | down      | PREDICTED: histone H2A.1 [Sesamum indicum]                                      |
| c53054.graph_c0 | 2.07580077    | 3.56207892    | 4.19176399    | 180.179502     | 208.610683     | 212.44761      | 2.435E-90 | 4.83712  | up        | PREDICTED: LOW QUALITY PROTEIN: 36.4 kDa proline-rich protein [Sesamum indicum] |
| c53073.graph_c0 | 0.27789504    | 0             | 0.35710614    | 4.84734041     | 3.64724492     | 2.80173472     | 2.399E-06 | 3.05198  | up        | -                                                                               |
| c53074.graph_c0 | 5.47554551    | 7.30803792    | 7.03629277    | 4.737613       | 4.79093479     | 3.86585352     | 1.504E-05 | -1.65919 | down      | PREDICTED: probable galacturonosyltransferase-like 1 [Sesamum indicum]          |
| c53076.graph_c0 | 7.84791442    | 8.10918495    | 8.29562771    | 0.4599854      | 0.08306474     | 0.15013773     | 1.251E-48 | -6.221   | down      | -                                                                               |
| c53085.graph_c0 | 0.37515921    | 0.84495346    | 1.44628329    | 6.33942749     | 5.90855086     | 5.28416668     | 2.441E-05 | 1.61136  | up        | unnamed protein product [Coffea canephora]                                      |
| c53092.graph_c0 | 6.059923      | 6.86414782    | 6.35274922    | 1.62264315     | 1.88369309     | 2.17524727     | 5.572E-15 | -2.85235 | down      | -                                                                               |
| c53100.graph_c0 | 0.36775843    | 0             | 0             | 3.56379612     | 3.94177286     | 4.79824708     | 2.381E-10 | 4.00646  | up        | hypothetical protein MIMGU_mgv1a00619mg [Erythranthe guttata]                   |
| c53102.graph_c0 | 0.29062867    | 1.45459844    | 0.74693869    | 5.49190827     | 7.62873577     | 7.06674785     | 3.689E-05 | 1.92429  | up        | -                                                                               |

| #ID             | 0 h-1<br>FPKM | 0 h-2<br>FPKM | 0 h-3<br>FPKM | 28 h-1<br>FPKM | 28 h-2<br>FPKM | 28 h-3<br>FPKM | FDR       | log2FC   | regulated | nr_annotation                                                                |
|-----------------|---------------|---------------|---------------|----------------|----------------|----------------|-----------|----------|-----------|------------------------------------------------------------------------------|
| c53107.graph_c0 | 57.2474771    | 57.6249403    | 58.9755134    | 33.3554418     | 31.3760771     | 31.7698687     | 2.316E-54 | -1.94017 | down      | PREDICTED: R3H domain-containing protein 1-like, partial [Sesamum indicum]   |
| c53108.graph_c0 | 39.3821837    | 38.7074593    | 42.5397766    | 17.8373623     | 22.6600158     | 21.2403525     | 2.731E-47 | -2.05799 | down      | -                                                                            |
| c53115.graph_c0 | 1.6316135     | 2.17766308    | 1.16482663    | 14.2301674     | 12.9674746     | 12.4718264     | 2.189E-06 | 1.9094   | up        | -                                                                            |
| c53119.graph_c0 | 33.9437957    | 51.7161879    | 37.2045447    | 33.9214633     | 38.8171792     | 34.1924928     | 8.687E-05 | -1.29114 | down      | -                                                                            |
| c53120.graph_c0 | 0.29504194    | 0             | 0             | 10.0784347     | 10.2615686     | 8.04894341     | 1.742E-12 | 5.52828  | up        | -                                                                            |
| c53141.graph_c0 | 0.0937898     | 0.09388372    | 0             | 6.20309572     | 8.00116262     | 6.73035966     | 4.166E-18 | 5.7307   | up        | PREDICTED: squamosa promoter-binding-like protein 9 [Sesamum indicum]        |
| c53164.graph_c0 | 23.5806769    | 24.3419234    | 20.6433079    | 3.74900314     | 3.77185528     | 3.05915595     | 7.664E-67 | -3.78584 | down      | PREDICTED: uncharacterized protein LOC103930947 [Pyrus x bretschneideri]     |
| c53168.graph_c0 | 2.12647036    | 0.38701813    | 0.74525416    | 17.141071      | 16.6185096     | 14.5602106     | 6.207E-11 | 2.81137  | up        | hypothetical protein M569_03938, partial [Genlisea aurea]                    |
| c53169.graph_c0 | 1.16791868    | 1.16908818    | 0.30016435    | 5.60232135     | 4.75180298     | 4.57144847     | 0.0028167 | 1.42303  | up        | -                                                                            |
| c53171.graph_c0 | 2.59364375    | 1.46454615    | 1.965577      | 21.7988576     | 19.2895509     | 18.4187386     | 9.73E-24  | 2.21591  | up        | PREDICTED: uncharacterized protein LOC105166615 isoform X1 [Sesamum indicum] |
| c53173.graph_c0 | 1.24885611    | 0.81256932    | 0.64193182    | 14.4318166     | 15.2023402     | 14.5166285     | 1.763E-26 | 2.94653  | up        | PREDICTED: 50S ribosomal protein L, chloroplastic [Sesamum indicum]          |
| c53178.graph_c0 | 15.4743775    | 15.4898727    | 11.2255092    | 13.9676613     | 13.1028453     | 10.9534392     | 4.71E-06  | -1.2374  | down      | PREDICTED: uncharacterized protein LOC105161374 [Sesamum indicum]            |
| c53184.graph_c0 | 0             | 0             | 0.14672768    | 3.07049739     | 3.82137659     | 2.97951446     | 1.653E-12 | 4.94098  | up        | PREDICTED: MATE efflux family protein LAL5-like [Sesamum indicum]            |
| c53185.graph_c0 | 6.03893014    | 4.21316594    | 5.87898812    | 65.9688961     | 65.9284005     | 67.938771      | 2.182E-34 | 2.53989  | up        | PREDICTED: 60S ribosomal protein L38 [Sesamum indicum]                       |
| c53215.graph_c0 | 1.81856002    | 0.72815241    | 2.10322946    | 21.147503      | 22.4356997     | 19.4132135     | 1.37E-13  | 2.66431  | up        | -                                                                            |
| c53222.graph_c0 | 0.59373033    | 0.19810829    | 0.76296698    | 9.63727514     | 11.9484051     | 7.5118212      | 1.258E-09 | 3.12709  | up        | PREDICTED: zeatin O-glucosyltransferase-like [Solanum lycopersicum]          |
| c53226.graph_c0 | 2.54984714    | 1.1911202     | 1.26697308    | 0              | 0              | 0              | 2.696E-12 | -Inf     | down      | carboxypeptidase, partial [Metarhizium majus ARSEF 297]                      |
| c53230.graph_c0 | 4.48999776    | 4.16156834    | 2.56436661    | 19.9424163     | 25.5359693     | 23.7682217     | 1.868E-07 | 1.54229  | up        | hypothetical protein MIMGU_mgv1a00/012mg [Erythranthe ontaria]               |
| c53235.graph_c0 | 0.24111558    | 0.36203553    | 0.9295292     | 4.03055251     | 4.03477743     | 3.28889793     | 7.893E-05 | 1.78036  | up        | PREDICTED: elicitor-responsive protein 3-like [Sesamum indicum]              |
| c53236.graph_c0 | 1.43918239    | 1.28055423    | 1.84940634    | 10.6923367     | 9.44430414     | 7.49199888     | 0.0001805 | 1.50049  | up        | -                                                                            |
| c53238.graph_c0 | 1.99943352    | 1.50107674    | 1.28467562    | 9.44564893     | 9.51259714     | 11.2649135     | 0.0009072 | 1.57439  | up        | -                                                                            |
| c53246.graph_c0 | 6.36010843    | 7.51244299    | 5.96628353    | 7.44220914     | 6.63614357     | 6.41225416     | 2.987E-07 | -1.04294 | down      | hypothetical protein MIMGU_mgv1a026/02mg [Erythranthe ontaria]               |
| c53264.graph_c0 | 1.09180025    | 1.63934028    | 0.70150327    | 5.35622036     | 6.44821972     | 5.50375891     | 0.0069804 | 1.249    | up        | PREDICTED: coatamer subunit beta&apos;-2-like [Glycine max]                  |
| c53267.graph_c0 | 0             | 0.15790331    | 0             | 6.64960801     | 6.21100611     | 6.4550997      | 1.881E-13 | 5.853    | up        | hypothetical protein JCGZ_13755 [Jatropha curcas]                            |
| c53270.graph_c0 | 49.0072083    | 46.0440538    | 43.6414038    | 8.12343921     | 10.7199519     | 15.0419594     | 6.49E-36  | -3.12016 | down      | Histone H3.3 [Triticum urartu]                                               |
| c53274.graph_c0 | 0.89951367    | 1.80082879    | 2.31182135    | 26.150454      | 25.3822637     | 20.0048971     | 1.077E-08 | 2.73382  | up        | PREDICTED: 8-hydroxygeraniol dehydrogenase-like [Sesamum indicum]            |

| #ID             | 0 h-1<br>FPKM | 0 h-2<br>FPKM | 0 h-3<br>FPKM | 28 h-1<br>FPKM | 28 h-2<br>FPKM | 28 h-3<br>FPKM | FDR       | log2FC   | regulated | nr_annotation                                                                                           |
|-----------------|---------------|---------------|---------------|----------------|----------------|----------------|-----------|----------|-----------|---------------------------------------------------------------------------------------------------------|
| c53275.graph_c0 | 0.27167786    | 0             | 0.69823362    | 10.2676031     | 12.3014831     | 9.18388415     | 5.715E-11 | 3.92121  | up        | ATP binding protein, putative [Ricinus communis]                                                        |
| c53277.graph_c0 | 3.22802712    | 5.1700152     | 2.07407133    | 17.3612251     | 20.3358597     | 18.7611967     | 0.0011453 | 1.346    | up        | prohibitin-like protein [Petunia x hybrida]                                                             |
| c53292.graph_c0 | 15.5221661    | 15.3173161    | 14.1465234    | 64.568132      | 67.9793434     | 64.4388309     | 5.963E-15 | 1.041    | up        | PREDICTED: U6 snRNA-associated Sm-like protein LSm6 [Sesamum indicum]                                   |
| c53293.graph_c0 | 5.21768387    | 3.13374515    | 2.23497678    | 23.0059075     | 29.6745393     | 22.279608      | 1.37E-05  | 1.74194  | up        | -                                                                                                       |
| c53299.graph_c0 | 1.38647313    | 1.15655123    | 1.33625465    | 9.32104628     | 11.2213745     | 8.56520005     | 9.442E-07 | 1.81596  | up        | PREDICTED: probable polygalacturonase [Sesamum indicum]                                                 |
| c53303.graph_c0 | 13.0587973    | 5.58277938    | 10.6629725    | 0              | 0              | 0              | 6.511E-16 | -Inf     | down      | hypothetical protein CICLE_v10032980mg [Citrus clementina]                                              |
| c53304.graph_c0 | 16.9487067    | 16.7771708    | 17.4238074    | 20.1197632     | 17.5483598     | 16.7526148     | 6.419E-06 | -1.00194 | down      | PREDICTED: vacuolar-sorting receptor 3-like [Sesamum indicum]                                           |
| c53313.graph_c0 | 10.3982339    | 12.9651557    | 11.4867538    | 5.96634982     | 6.94331468     | 6.7077011      | 1.169E-11 | -1.92013 | down      | PREDICTED: uncharacterized protein LOC100815796 [Glycine max]                                           |
| c53319.graph_c0 | 3.57671215    | 2.68522027    | 0.38301806    | 14.9473192     | 13.6916224     | 11.3130578     | 0.0025609 | 1.51462  | up        | PREDICTED: succinyl-CoA ligase [ADP-forming] subunit beta, mitochondrial [Prunus mume]                  |
| c53339.graph_c0 | 0             | 0             | 0             | 5.2255944      | 6.43393881     | 5.2977496      | 5.101E-13 | Inf      | up        | hypothetical protein MIMGU_mgv1a021216mg, partial [Erythranthe guttata]                                 |
| c53342.graph_c0 | 45.9986597    | 38.7001638    | 42.7913599    | 29.3295288     | 29.8151898     | 36.4847483     | 2.044E-16 | -1.50388 | down      | hypothetical protein MIMGU_mgv1a006294mg [Erythranthe guttata]                                          |
| c53351.graph_c0 | 87.9821338    | 90.7781042    | 81.4433066    | 70.9666766     | 69.8245208     | 64.8602718     | 1.682E-50 | -1.42926 | down      | PREDICTED: zinc finger A20 and AN1 domain-containing stress-associated protein 8-like [Sesamum indicum] |
| c53354.graph_c0 | 0             | 0             | 0             | 6.93521085     | 6.36620924     | 3.96135279     | 1.283E-10 | Inf      | up        | PREDICTED: uncharacterized protein DDB_G0271670-like [Solanum tuberosum]                                |
| c53357.graph_c0 | 3.66676612    | 2.09739305    | 1.68283558    | 12.5634983     | 13.2342712     | 14.1349362     | 0.0017072 | 1.34155  | up        | -                                                                                                       |
| c53362.graph_c0 | 10.8480194    | 12.4761624    | 10.6775498    | 3.69051311     | 3.7865765      | 3.96961037     | 1.35E-15  | -2.66033 | down      | PREDICTED: uncharacterized protein LOC105161926 [Sesamum indicum]                                       |
| c53364.graph_c0 | 12.0072761    | 8.82429586    | 8.00788393    | 9.05821723     | 5.28624641     | 9.10408        | 1.344E-05 | -1.38287 | down      | -                                                                                                       |
| c53370.graph_c0 | 8.2008455     | 8.40451115    | 8.02926564    | 2.1286883      | 2.05013968     | 3.35818506     | 6.425E-15 | -2.79637 | down      | -                                                                                                       |
| c53377.graph_c0 | 0             | 0             | 0             | 18.1224201     | 20.7528782     | 21.2799284     | 1.368E-25 | Inf      | up        | -                                                                                                       |
| c53452.graph_c0 | 7.11333189    | 5.53813152    | 5.75538973    | 2.87218257     | 3.80352363     | 4.29674212     | 9.235E-09 | -1.83367 | down      | PREDICTED: trineix transcription factor G1-3b [Sesamum indicum]                                         |
| c53470.graph_c0 | 0.97742074    | 0.24459987    | 0.31400609    | 16.6940183     | 15.2334858     | 15.6510183     | 5.608E-13 | 3.87566  | up        | -                                                                                                       |
| c53487.graph_c0 | 1.15219476    | 1.25819838    | 0.53840578    | 6.31862788     | 6.32375694     | 6.21198645     | 0.0001515 | 1.59477  | up        | PREDICTED: rapid alkalinization factor-like [Sesamum indicum]                                           |
| c53493.graph_c0 | 39.7799322    | 37.4424663    | 46.0323412    | 1.72607913     | 1.42861365     | 1.52583868     | 1.005E-73 | -5.81157 | down      | -                                                                                                       |
| c53497.graph_c0 | 0             | 0.8801094     | 1.12984406    | 12.1413526     | 11.25099       | 9.64652765     | 2.959E-08 | 2.92898  | up        | PREDICTED: UDP-arabinopyranose mutase 3-like [Sesamum indicum]                                          |
| c53522.graph_c0 | 118.232222    | 138.137357    | 123.920424    | 6.71332015     | 8.00117823     | 10.5177877     | 5.42E-153 | -5.00278 | down      | PREDICTED: uncharacterized protein LOC105355027 [Prunus mume]                                           |
| c53537.graph_c0 | 23.7420201    | 23.0345389    | 29.570684     | 2.92017226     | 2.87633647     | 3.46594432     | 1.816E-31 | -4.13591 | down      | --                                                                                                      |
| c53566.graph_c0 | 4.81448288    | 4.81930385    | 3.68261971    | 1.7495692      | 2.1062626      | 2.71930321     | 1.046E-09 | -2.10365 | down      | -                                                                                                       |

| #ID             | 0 h-1<br>FPKM | 0 h-2<br>FPKM | 0 h-3<br>FPKM | 28 h-1<br>FPKM | 28 h-2<br>FPKM | 28 h-3<br>FPKM | FDR       | log2FC   | regulated | nr_annotation                                                                                   |
|-----------------|---------------|---------------|---------------|----------------|----------------|----------------|-----------|----------|-----------|-------------------------------------------------------------------------------------------------|
| c53570.graph_c0 | 39.5187624    | 31.4438043    | 24.7405208    | 25.0396999     | 19.5053737     | 22.4353466     | 2.841E-07 | -1.59965 | down      | -                                                                                               |
| c53579.graph_c0 | 0             | 0.37847426    | 0.16195596    | 5.03795855     | 5.62397612     | 6.12902744     | 5.102E-11 | 3.86165  | up        | -                                                                                               |
| c53583.graph_c0 | 17.4130014    | 13.7392863    | 9.47706191    | 1.63779246     | 0.26886783     | 1.57941169     | 2.755E-15 | -4.62268 | down      | -                                                                                               |
| c53596.graph_c0 | 37.1588891    | 34.3981615    | 33.5944794    | 22.3463895     | 28.0531581     | 29.2531625     | 2.697E-22 | -1.48956 | down      | PREDICTED: proliferating cell nuclear antigen-like [Neiumbo nucifera]                           |
| c53619.graph_c0 | 4.40334048    | 5.58314969    | 6.03569797    | 22.6156122     | 25.428402      | 24.0252205     | 0.0013085 | 1.07522  | up        | -                                                                                               |
| c53622.graph_c0 | 0.24538388    | 0             | 0             | 15.515892      | 15.7806986     | 16.8811216     | 1.25E-17  | 6.55865  | up        | -                                                                                               |
| c53646.graph_c0 | 0.15199084    | 0.60857213    | 0.39062848    | 7.51169234     | 5.58546791     | 5.76892198     | 2.32E-08  | 2.93892  | up        | -                                                                                               |
| c53652.graph_c0 | 1.65933192    | 0.95203286    | 1.01414612    | 0              | 0              | 0              | 7.69E-22  | -Inf     | down      | hypothetical protein VHEMI09090 [Torrubiella hemipterigena]                                     |
| c53655.graph_c0 | 1.15083192    | 0.92158744    | 0.29577291    | 12.2953447     | 15.9348684     | 13.5819542     | 1.578E-15 | 3.06481  | up        | -                                                                                               |
| c53686.graph_c0 | 0             | 0.26217413    | 0             | 6.0913931      | 6.53119876     | 4.65986909     | 1.177E-09 | 4.95953  | up        | PREDICTED: cytochrome b561 and DOMON domain-containing protein At3g25290-like [Sesamum indicum] |
| c53698.graph_c0 | 0.970612      | 0.64772261    | 1.52444703    | 8.15169569     | 10.2618409     | 9.59382276     | 2.176E-08 | 2.05717  | up        | hypothetical protein POPTR_0007s07730g [Populus trichocarpa]                                    |
| c53715.graph_c0 | 0             | 1.38558188    | 0             | 8.65181964     | 10.7184915     | 6.89563245     | 2.997E-06 | 3.16122  | up        | PREDICTED: purple acid phosphatase 2 [Sesamum indicum]                                          |
| c53744.graph_c0 | 0             | 0.19286941    | 0             | 6.7217351      | 9.35652388     | 9.48427331     | 4.985E-14 | 5.96913  | up        | -                                                                                               |
| c53761.graph_c0 | 4.78310974    | 5.54388339    | 6.14648538    | 0.54889525     | 0.49560095     | 2.68736425     | 4.786E-13 | -3.22726 | down      | -                                                                                               |
| c53764.graph_c0 | 24.9395847    | 19.5035609    | 16.5249324    | 16.7098569     | 16.1103109     | 15.0217278     | 5.473E-07 | -1.43595 | down      | -                                                                                               |
| c53797.graph_c0 | 7.16445354    | 9.05889809    | 7.75293175    | 0              | 0.7423434      | 0              | 1.454E-24 | -6.11417 | down      | -                                                                                               |
| c53803.graph_c0 | 5.85961153    | 5.44651625    | 4.3027616     | 4.10663432     | 3.57057591     | 4.21975268     | 6.685E-05 | -1.47796 | down      | -                                                                                               |
| c53824.graph_c0 | 1.93995142    | 0.52960745    | 1.1331429     | 20.1237677     | 15.2765832     | 18.8264294     | 6.593E-13 | 2.82739  | up        | -                                                                                               |
| c53867.graph_c0 | 8.42534016    | 5.95325426    | 6.36876217    | 64.4767337     | 56.5902875     | 68.1904874     | 9.848E-11 | 2.10243  | up        | PREDICTED: 40S ribosomal protein S19-1 [Sesamum indicum]                                        |
| c53882.graph_c0 | 67.0435898    | 82.1837206    | 55.7464905    | 32.8320253     | 38.3492953     | 32.3188969     | 2.476E-12 | -2.07409 | down      | -                                                                                               |
| c53904.graph_c0 | 0.28357327    | 0             | 0             | 5.5646843      | 6.51309579     | 5.5497896      | 3.82E-09  | 4.89853  | up        | PREDICTED: alpha-galactosidase-like [Sesamum indicum]                                           |
| c53924.graph_c0 | 0             | 0.25308776    | 0             | 6.43155522     | 5.47525756     | 5.847879       | 2.258E-10 | 5.05081  | up        | unnamed protein product [Vitis vinifera]                                                        |
| c53936.graph_c0 | 9.60426716    | 11.1219447    | 11.8578689    | 2.05303706     | 4.07813995     | 4.24399574     | 1.206E-17 | -2.74284 | down      | -                                                                                               |
| c53939.graph_c0 | 0.24936784    | 0             | 0             | 10.3306292     | 7.20024458     | 6.3592542      | 1.427E-11 | 5.52201  | up        | -                                                                                               |
| c53960.graph_c0 | 3.04283179    | 3.65505447    | 4.30117525    | 32.288084      | 38.138661      | 54.8591173     | 2.444E-06 | 2.41726  | up        | -                                                                                               |
| c53979.graph_c0 | 0             | 0.258687      | 0             | 6.19819672     | 8.30979196     | 8.27620021     | 1.082E-12 | 5.37941  | up        | -                                                                                               |
| c53980.graph_c0 | 0.99722046    | 0.95068479    | 1.34249005    | 0.0690261      | 0              | 0.05632474     | 7.949E-23 | -5.8051  | down      | hypothetical protein VITISV_003451 [Vitis vinifera]                                             |
| c53984.graph_c0 | 2.03709422    | 1.03247294    | 1.25916931    | 0              | 0              | 0              | 1.128E-17 | -Inf     | down      | Animal heme peroxidase homologue [Chondrus crispus]                                             |
| c54024.graph_c0 | 4.07715466    | 5.37981283    | 3.81040376    | 0.40407989     | 0              | 0              | 2.17E-26  | -6.13046 | down      | PREDICTED: 17.5 kDa class 1 heat shock protein-like [Sesamum indicum]                           |



| #ID             | 0 h-1<br>FPKM | 0 h-2<br>FPKM | 0 h-3<br>FPKM | 28 h-1<br>FPKM | 28 h-2<br>FPKM | 28 h-3<br>FPKM | FDR       | log2FC   | regulated | nr_annotation                                                                                 |
|-----------------|---------------|---------------|---------------|----------------|----------------|----------------|-----------|----------|-----------|-----------------------------------------------------------------------------------------------|
| c54082.graph_c0 | 1.37939147    | 0.69038636    | 0.29542878    | 5.17975783     | 4.073373       | 4.09029686     | 0.004443  | 1.42111  | up        | -                                                                                             |
| c54121.graph_c0 | 12.6478425    | 9.64610089    | 12.7701973    | 0.43773234     | 0.19761563     | 0.53577902     | 1.429E-32 | -5.99224 | down      | -                                                                                             |
| c54141.graph_c0 | 13.2980161    | 12.9655831    | 15.0911226    | 2.5103692      | 5.32657584     | 3.48234931     | 1.099E-25 | -2.96286 | down      | -                                                                                             |
| c54179.graph_c0 | 0.35852187    | 1.4355235     | 0.4607148     | 7.03543399     | 7.0581525      | 6.37872964     | 0.0001165 | 2.09402  | up        | -                                                                                             |
| c54197.graph_c0 | 1.99875535    | 0.82639955    | 1.3400764     | 0              | 0              | 0              | 4.57E-12  | -Inf     | down      | Subunit of cleavage factor I [Komagataella pastoris GS115]                                    |
| c54205.graph_c0 | 6.46064145    | 7.52887526    | 6.07174361    | 1.82215644     | 1.51867977     | 1.65842609     | 3.896E-25 | -3.09379 | down      | -                                                                                             |
| c54229.graph_c0 | 42.4606142    | 39.4887255    | 34.8278108    | 28.8903342     | 32.2113475     | 31.610962      | 1.194E-13 | -1.421   | down      | -                                                                                             |
| c54344.graph_c0 | 0             | 0.65673867    | 0.28103032    | 6.51676417     | 8.32374557     | 10.1164599     | 8.413E-10 | 3.63905  | up        | -                                                                                             |
| c54436.graph_c0 | 3.74390787    | 5.30918051    | 5.0783515     | 0.90701689     | 1.16018088     | 0.37005919     | 4.137E-20 | -3.63315 | down      | PREDICTED: uncharacterized protein LOC104248461 [Nicotiana sylvestris]                        |
| c54544.graph_c0 | 0             | 0             | 0             | 10.5055761     | 7.90462516     | 10.5369873     | 3.284E-14 | Inf      | up        | -                                                                                             |
| c54570.graph_c0 | 1.20042506    | 1.10919425    | 1.00861898    | 0              | 0              | 0.02738161     | 9.468E-29 | -7.99519 | down      | -                                                                                             |
| c54603.graph_c0 | 1.87925616    | 1.20930297    | 1.29370638    | 0              | 0              | 0              | 1.398E-25 | -Inf     | down      | hypothetical protein EMIHURAFT_349549 [Emiliania huxleyi CCMP1516]                            |
| c54893.graph_c0 | 14.1229337    | 15.7078618    | 13.6113967    | 3.42148893     | 1.28720155     | 0.69797676     | 2.662E-23 | -4.09939 | down      | -                                                                                             |
| c55206.graph_c0 | 1.36300467    | 0.73675954    | 0.87575748    | 0              | 0              | 0              | 7.402E-22 | -Inf     | down      | hypothetical protein GUITHDRAFT_143910 [Guillardia theta CCMP2712]                            |
| c55419.graph_c0 | 1.08967852    | 0.65094319    | 0.49687356    | 0              | 0              | 0              | 4.649E-14 | -Inf     | down      | PREDICTED: peroxisomal acyl-coenzyme A oxidase 1-like [Cicer arietinum]                       |
| c55533.graph_c0 | 65.4266014    | 66.595916     | 48.6505878    | 12.2886356     | 9.64824849     | 10.8993764     | 6.8E-36   | -3.54659 | down      | Ubiquitin [Medicago truncatula]                                                               |
| c55599.graph_c0 | 0.80689701    | 0.63211695    | 0.90164748    | 0.07649323     | 0.04604414     | 0.02080595     | 4.424E-22 | -5.1257  | down      | Disease resistance family protein / LRR family protein, putative [Theobroma cacao]            |
| c56027.graph_c0 | 5.6848328     | 10.74877      | 6.89938882    | 0              | 0              | 0              | 6.266E-15 | -Inf     | down      | -                                                                                             |
| c57000.graph_c0 | 1.01810985    | 0.84927444    | 0.65415573    | 13.4425407     | 13.3622245     | 15.296225      | 9.734E-12 | 2.9768   | up        | -                                                                                             |
| c57052.graph_c0 | 0.31077248    | 0             | 0.39935494    | 5.42082347     | 12.4401757     | 6.26640922     | 0.0007813 | 3.98466  | up        | -                                                                                             |
| c57433.graph_c0 | 1.21464826    | 0.63556556    | 0.92233293    | 0              | 0              | 0              | 7.587E-19 | -Inf     | down      | ATP-binding cassette transporter, subfamily F, member 4, SmABCF4 [Selaginella moellendorffii] |
| c60866.graph_c0 | 7.69544718    | 11.5547295    | 8.72554792    | 0.82250098     | 0.59411301     | 0              | 4.02E-25  | -5.40125 | down      | hypothetical protein MIMGU_mgv1a015592mg [Erythroneurum affinale]                             |
| c62784.graph_c0 | 0.57135043    | 0.50329185    | 0.41115644    | 0              | 0              | 0              | 4.076E-29 | -Inf     | down      | predicted protein [Hordeum vulgare subsp. vulgare]                                            |

Transcriptomic analysis of seed germination improvement of *Andrographis paniculata* responding to air plasma treatment

Jia-Yun Tong 1\*, Rui He 2\*, Xiao-Ting Tang 2, Ming-Zhi Li 3 and Jing-Lin Wan 4
