# Supplementary material for: Transcriptomic analysis of seed germination improvement of Andrographis paniculata responding to air plasma treatment
Source: PubMed Central journal article supplement (PMC7580921; doi:10.1371/journal.pone.0240939), 2020-10-22
Supplement: pone.0240939.s007.pdf [file pone.0240939.s007.pdf]

**S5 Table. Differentially expressed genes of plasma-treated groups (48 HAS vs. 28 HAS).**

| #ID             | 28 h-1<br>FPKM | 28 h-2<br>FPKM | 28 h-3<br>FPKM | 48 h-1<br>FPKM | 48 h-2<br>FPKM | 48 h-3<br>FPKM | FDR       | log2FC    | regulated | nr_annotation                                                                              |
|-----------------|----------------|----------------|----------------|----------------|----------------|----------------|-----------|-----------|-----------|--------------------------------------------------------------------------------------------|
| c13810.graph_c0 | 23.024867      | 23.342368      | 24.556381      | 7.4244362      | 9.8994166      | 9.2259261      | 4.154E-06 | -1.380393 | down      | PREDICTED: SNF2 domain-containing protein CLASSY 3-like [Sesamum indicum]                  |
| c14030.graph_c0 | 1.0971573      | 0.9456015      | 0.8545772      | 23.705585      | 26.184689      | 32.230237      | 3.606E-63 | 4.863565  | up        | RecName: Full=Galactinol synthase 1; Short=ArGolS1; Short=GolS-1 [Ajuga reptans]           |
| c14063.graph_c0 | 6.4282357      | 5.5539176      | 5.4262632      | 10.185328      | 11.75751       | 12.750483      | 0.0005064 | 1.033639  | up        | PREDICTED: zinc finger protein ZAT5 [Sesamum indicum]                                      |
| c14105.graph_c0 | 79.580786      | 90.90919       | 68.371208      | 27.228952      | 36.605454      | 28.337026      | 6.872E-12 | -1.334881 | down      | PREDICTED: protein EXORDIUM-like 2 [Sesamum indicum]                                       |
| c14260.graph_c0 | 22.709144      | 25.785619      | 23.092904      | 1.8536125      | 1.8481673      | 2.6195293      | 7.048E-25 | -3.46221  | down      | -                                                                                          |
| c14261.graph_c0 | 24.235438      | 29.233423      | 21.475413      | 7.9200523      | 6.3563145      | 7.4743189      | 3.46E-09  | -1.739177 | down      | PREDICTED: probable mitochondrial chaperone HSC1-B [Sesamum indicum]                       |
| c14379.graph_c0 | 0.6776029      | 0.6118119      | 0.7372246      | 7.4439008      | 28.510599      | 29.041667      | 4.067E-05 | 5.025464  | up        | -                                                                                          |
| c14708.graph_c0 | 0.1447751      | 0.2287571      | 0.2658045      | 1.1928354      | 1.6038818      | 1.0205555      | 2.277E-08 | 2.61726   | up        | PREDICTED: hyoscyamine 6-dioxygenase [Sesamum indicum]                                     |
| c14733.graph_c0 | 11.047343      | 11.6449        | 10.733594      | 23.121763      | 31.118624      | 32.859815      | 7.317E-13 | 1.418014  | up        | PREDICTED: rascicium-like arabinogalactan protein 1 / [Sesamum indicum]                    |
| c14818.graph_c0 | 3.2524346      | 2.3772829      | 3.5386135      | 8.2454009      | 7.6951212      | 9.956961       | 0.0003156 | 1.5386    | up        | enolase [Solanum lycopersicum]                                                             |
| c14888.graph_c0 | 3.4511127      | 1.9175576      | 3.4659443      | 13.460122      | 20.676082      | 16.168593      | 8.84E-09  | 2.544561  | up        | -                                                                                          |
| c15072.graph_c0 | 1.4645765      | 1.7113091      | 1.7926236      | 8.026453       | 13.419785      | 12.534745      | 2.117E-13 | 2.807118  | up        | hypothetical protein MIMGU_mgv1a012722mg [Erythranthe guttata]                             |
| c15079.graph_c0 | 31.693071      | 29.963558      | 29.515158      | 7.7571683      | 9.6876258      | 8.9785778      | 7.098E-18 | -1.74824  | down      | PREDICTED: plasma membrane ATPase 1-like [Sesamum indicum]                                 |
| c15094.graph_c0 | 17.458396      | 12.913434      | 14.326394      | 33.757327      | 40.530034      | 38.603193      | 6.571E-09 | 1.375534  | up        | -                                                                                          |
| c15108.graph_c0 | 44.686228      | 41.638593      | 40.741992      | 6.7971702      | 8.9609677      | 10.483341      | 2.857E-16 | -2.239886 | down      | PREDICTED: elongation of fatty acids protein 5-like [Sesamum indicum]                      |
| c15155.graph_c1 | 12.761072      | 15.289926      | 18.457043      | 9.2760543      | 5.8473846      | 7.0259427      | 0.0003507 | -1.020665 | down      | -                                                                                          |
| c15159.graph_c0 | 1.3133048      | 2.9644777      | 2.8051909      | 14.150039      | 18.621108      | 16.293744      | 1.511E-27 | 2.830255  | up        | PREDICTED: probable xyloglucan endotransglucosylase/hydrolase protein 23 [Sesamum indicum] |
| c15187.graph_c0 | 16.924761      | 14.262708      | 12.515736      | 6.7935708      | 7.5757521      | 5.5676512      | 1.924E-06 | -1.089637 | down      | PREDICTED: ATP sulfurylase 1, chloroplastic-like [Sesamum indicum]                         |
| c15187.graph_c1 | 14.82529       | 15.33442       | 12.939534      | 5.4711314      | 6.3000004      | 4.0215399      | 4.879E-05 | -1.405356 | down      | hypothetical protein MIMGU_mgv1a005900mg [Erythranthe guttata]                             |
| c15194.graph_c0 | 57.696219      | 87.283787      | 70.30768       | 4.7222419      | 5.2591884      | 5.1714737      | 3.89E-23  | -3.788054 | down      | -                                                                                          |
| c15238.graph_c0 | 17.348785      | 16.853503      | 17.269408      | 4.7781195      | 5.5497262      | 5.1735631      | 1.822E-11 | -1.691601 | down      | PREDICTED: uncharacterized protein LOC10518018 / [Sesamum indicum]                         |
| c15329.graph_c0 | 79.212808      | 79.097038      | 69.139391      | 153.39057      | 181.37739      | 207.84065      | 8.589E-16 | 1.292407  | up        | PREDICTED: dof zinc finger protein DOF3.1-like isoform X1 [Sesamum indicum]                |
| c15339.graph_c0 | 25.510448      | 29.231323      | 30.848277      | 73.633424      | 67.687472      | 92.673544      | 1.048E-11 | 1.491726  | up        | hypothetical protein ZEAMMB73_313798 [Zea mays]                                            |
| c15361.graph_c0 | 7.6979917      | 7.0457779      | 6.1954504      | 20.651722      | 21.169969      | 19.565149      | 3.429E-11 | 1.594262  | up        | hypothetical protein MIMGU_mgv1a014572mg [Erythranthe guttata]                             |
| c15371.graph_c0 | 12.221407      | 3.7576486      | 19.323346      | 1.1144988      | 0.9445411      | 0.9586186      | 0.0072939 | -3.505097 | down      | PREDICTED: protein notum homolog isoform X1 [Sesamum indicum]                              |
| c15378.graph_c0 | 18.062837      | 21.293969      | 21.067057      | 2.5889443      | 3.9425918      | 3.4194465      | 1.112E-32 | -2.566786 | down      | PREDICTED: uncharacterized protein LOC105156846 [Sesamum indicum]                          |

| #ID             | 28 h-1<br>FPKM | 28 h-2<br>FPKM | 28 h-3<br>FPKM | 48 h-1<br>FPKM | 48 h-2<br>FPKM | 48 h-3<br>FPKM | FDR       | log2FC    | regulated | nr_annotation                                                                                            |
|-----------------|----------------|----------------|----------------|----------------|----------------|----------------|-----------|-----------|-----------|----------------------------------------------------------------------------------------------------------|
| c15396.graph_c0 | 7.8045974      | 9.7967981      | 9.3197382      | 1.9303224      | 4.6011206      | 4.0792744      | 0.0034524 | -1.314727 | down      | hypothetical protein M569_04751, partial [Genlisea aurea]                                                |
| c15426.graph_c0 | 3.3753825      | 2.6666972      | 3.2863623      | 4.9592237      | 7.9320511      | 8.9551598      | 0.0002638 | 1.260204  | up        | hypothetical protein MIMGU_mgv1a021331mg [Erythranthe guttata]                                           |
| c15435.graph_c0 | 27.789808      | 26.47278       | 30.928472      | 14.327243      | 9.3578506      | 13.323406      | 5.782E-06 | -1.155792 | down      | PREDICTED: uncharacterized protein LOC105156981 [Sesamum indicum]                                        |
| c15435.graph_c1 | 15.133615      | 13.262346      | 14.164922      | 6.3943238      | 6.5747751      | 6.6936833      | 0.0072664 | -1.072713 | down      | SEY1 [Theobroma cacao]                                                                                   |
| c15497.graph_c0 | 3.3262365      | 3.4553864      | 3.2978769      | 1.1334005      | 1.2967564      | 1.6539284      | 0.0018881 | -1.265767 | down      | -                                                                                                        |
| c15510.graph_c0 | 4.5897872      | 4.4801594      | 4.6562304      | 68.085075      | 111.93981      | 112.20904      | 1.254E-22 | 4.44525   | up        | -                                                                                                        |
| c15515.graph_c0 | 0              | 0              | 0.1085284      | 7.9237105      | 15.359619      | 13.5009        | 1.354E-19 | 8.431133  | up        | -                                                                                                        |
| c15532.graph_c0 | 1.2955535      | 2.6514636      | 2.0438447      | 6.5688379      | 16.817311      | 14.417451      | 0.0001273 | 2.685767  | up        | PREDICTED: laccase-14-like [Sesamum indicum]                                                             |
| c15566.graph_c0 | 0.2441808      | 0.2204723      | 0.4649155      | 2.1666198      | 4.262646       | 4.773712       | 1.62E-07  | 3.61964   | up        | PREDICTED: polygalacturonase At1g48100 [Sesamum indicum]                                                 |
| c15600.graph_c0 | 0.1735383      | 0.5092386      | 0.2478102      | 1.539808       | 1.3982056      | 1.1743816      | 1.456E-06 | 2.190674  | up        | PREDICTED: transcription factor RAX2-like [Sesamum indicum]                                              |
| c15849.graph_c0 | 111.62877      | 125.85772      | 105.94461      | 48.45382       | 45.357087      | 52.684464      | 7.88E-15  | -1.186782 | down      | -                                                                                                        |
| c15959.graph_c0 | 2.0028488      | 1.9656355      | 1.207967       | 5.6294207      | 5.2620782      | 7.1697805      | 8.011E-06 | 1.844235  | up        | V-type proton ATPase catalytic subunit A [Gossypium arboreum]                                            |
| c15999.graph_c0 | 2.3629175      | 1.3207337      | 0.918153       | 4.7066988      | 3.6263103      | 3.9341746      | 0.0007084 | 1.461777  | up        | hypothetical protein EUTSA_v10020227mg [Eutrema salsugineum]                                             |
| c16017.graph_c0 | 2.898794       | 4.0332768      | 3.1021537      | 37.045532      | 21.50512       | 12.166791      | 0.0063725 | 2.876076  | up        | PREDICTED: uncharacterized protein LOC105174057 [Sesamum indicum]                                        |
| c16031.graph_c0 | 11.351758      | 12.567316      | 11.264482      | 6.5799813      | 6.0514801      | 4.1176811      | 0.0006857 | -1.023639 | down      | PREDICTED: uncharacterized protein LOC105156518 [Sesamum indicum]                                        |
| c16076.graph_c0 | 12.843375      | 13.264905      | 13.948321      | 4.5677486      | 3.4741364      | 1.8758562      | 5.858E-08 | -1.961232 | down      | PREDICTED: dot zinc finger protein DUF351-like [Solanum lycopersicum]                                    |
| c16083.graph_c0 | 39.6964        | 43.788259      | 41.71226       | 70.848849      | 85.993539      | 102.42823      | 2.145E-08 | 1.08736   | up        | PREDICTED: phosphoglycerate kinase, chloroplastic-like [Fragaria vesca subsp. vesca]                     |
| c16084.graph_c0 | 5.2124317      | 4.377988       | 5.6380976      | 15.672753      | 13.347817      | 12.168151      | 0.0001031 | 1.481292  | up        | acetylajmalan acylesterase [Striga asiatica]                                                             |
| c16100.graph_c0 | 39.131245      | 41.063873      | 40.592849      | 14.379226      | 10.201949      | 10.91645       | 4.498E-12 | -1.718084 | down      | hypothetical protein M569_09334 [Genlisea aurea]                                                         |
| c16107.graph_c0 | 26.319475      | 23.216144      | 21.785936      | 41.918664      | 48.583699      | 64.931014      | 1.082E-05 | 1.16087   | up        | Fructose-bisphosphate aldolase, chloroplast precursor, putative, expressed [Oryza sativa Japonica Group] |
| c16197.graph_c0 | 5.2668286      | 6.3009744      | 5.7481592      | 0.6676093      | 0.5304383      | 0.5940347      | 2.72E-12  | -3.226495 | down      | -                                                                                                        |
| c16349.graph_c0 | 0.1066916      | 0.0688089      | 0.1243707      | 0.4636782      | 0.8186848      | 0.9454915      | 2.048E-07 | 2.923506  | up        | PREDICTED: uncharacterized protein At4g58062-like [Sesamum indicum]                                      |
| c17172.graph_c0 | 1.2227068      | 1.9319819      | 2.2448673      | 9.2992259      | 8.2095019      | 10.342994      | 1.222E-07 | 2.408982  | up        | PREDICTED: uncharacterized protein LOC105167003 isoform X1 [Sesamum indicum]                             |
| c17811.graph_c0 | 2.2140403      | 2.2163611      | 2.0030126      | 33.18943       | 24.431152      | 17.045903      | 9.701E-08 | 3.588605  | up        | PREDICTED: uncharacterized protein LOC105158587 [Sesamum indicum]                                        |
| c17816.graph_c0 | 6.5142907      | 3.9996198      | 6.8039783      | 23.781149      | 24.143525      | 21.454216      | 6.412E-07 | 2.044287  | up        | PREDICTED: L-ascorbate oxidase homolog [Cucumis melo]                                                    |
| c17845.graph_c0 | 4.1497568      | 3.0655974      | 4.0018345      | 85.022706      | 89.969929      | 106.79879      | 6.82E-113 | 4.69      | up        | hypothetical protein MIMGU_mgv1a009966mg [Erythranthe guttata]                                           |
| c18297.graph_c0 | 2.6547021      | 3.3557259      | 6.4986456      | 14.469631      | 12.476946      | 13.773245      | 8.672E-05 | 1.745654  | up        | TPA: putative methionine synthase family protein [Zea mays]                                              |
| c18381.graph_c0 | 8.893457       | 8.3645394      | 6.3498648      | 14.717674      | 15.757459      | 15.603384      | 0.0048915 | 1.006167  | up        | --                                                                                                       |

| #ID             | 28 h-1<br>FPKM | 28 h-2<br>FPKM | 28 h-3<br>FPKM | 48 h-1<br>FPKM | 48 h-2<br>FPKM | 48 h-3<br>FPKM | FDR       | log2FC    | regulated | nr_annotation                                                                              |
|-----------------|----------------|----------------|----------------|----------------|----------------|----------------|-----------|-----------|-----------|--------------------------------------------------------------------------------------------|
| c18653.graph_c1 | 2.3389538      | 2.5206023      | 2.7705008      | 11.189715      | 10.739654      | 20.253477      | 3.304E-05 | 2.503633  | up        | unnamed protein product [Coffea canephora]                                                 |
| c18661.graph_c0 | 1.8435688      | 1.5314042      | 1.2034696      | 2.804231       | 5.0502627      | 3.9091277      | 0.0010735 | 1.395107  | up        | -                                                                                          |
| c18700.graph_c0 | 2.1265601      | 2.1600949      | 1.7352557      | 10.19263       | 7.7637474      | 5.546539       | 0.0001083 | 2.015599  | up        | PREDICTED: NADPH--cytochrome P450 reductase-like [Sesamum indicum]                         |
| c18725.graph_c0 | 2.3330832      | 2.0363368      | 1.7451288      | 0.5421817      | 0.7310237      | 0.6578591      | 0.0003024 | -1.625268 | down      | PREDICTED: basic 7S globulin-like [Nelumbo nucifera]                                       |
| c18726.graph_c0 | 0.8288991      | 1.6137766      | 1.0568357      | 2.5282243      | 3.2696704      | 4.4991975      | 0.0001044 | 1.59251   | up        | PREDICTED: sulfite reductase 1 [ferredoxin], chloroplastic-like [Sesamum indicum]          |
| c18736.graph_c0 | 12.887071      | 13.1301        | 12.796001      | 3.7829142      | 3.1331668      | 3.8862165      | 3.842E-15 | -1.801265 | down      | PREDICTED: cation/calcium exchanger 3-like [Sesamum indicum]                               |
| c18743.graph_c0 | 0.3735395      | 0.786966       | 0.4064069      | 2.1306996      | 1.7556139      | 2.1767554      | 6.904E-06 | 1.99729   | up        | hypothetical protein MIMGU_mgv1a000037mg [Erythranthe guttata]                             |
| c18755.graph_c0 | 6.6967985      | 6.1660788      | 6.4580843      | 12.6827        | 13.613505      | 15.972142      | 3.952E-09 | 1.16873   | up        | PREDICTED: uncharacterized protein LOC105174054 [Sesamum indicum]                          |
| c18762.graph_c0 | 0.7205654      | 0.4592492      | 0.4150415      | 1.9879223      | 2.2767164      | 1.8166479      | 6.551E-06 | 1.972441  | up        | PREDICTED: folate-biopterin transporter 1, chloroplastic-like isoform X1 [Sesamum indicum] |
| c18797.graph_c0 | 2.6017156      | 2.7406228      | 3.1137021      | 17.258833      | 12.693738      | 11.933314      | 2.963E-09 | 2.357234  | up        | -                                                                                          |
| c18812.graph_c0 | 2.6080442      | 1.6428972      | 2.0786511      | 0.0768811      | 0.5701236      | 1.2313504      | 0.0035535 | -1.735707 | down      | -                                                                                          |
| c18813.graph_c0 | 0.3545422      | 0.3658495      | 0.2066454      | 1.7976332      | 3.2646418      | 5.0270729      | 7.764E-05 | 3.473879  | up        | PREDICTED: glyoxylate/succinic semialdehyde reductase 1 [Sesamum indicum]                  |
| c18829.graph_c0 | 1.0512441      | 2.0881847      | 2.9737295      | 5.3301173      | 8.4699194      | 10.829179      | 8.966E-05 | 2.041633  | up        | PREDICTED: uncharacterized protein LOC105159002 [Sesamum indicum]                          |
| c18840.graph_c0 | 8.0496162      | 8.7702594      | 7.7663094      | 14.173225      | 16.756137      | 18.268376      | 7.604E-09 | 1.039171  | up        | hypothetical protein MIMGU_mgv1a005412mg [Erythranthe guttata]                             |
| c18896.graph_c0 | 9.3899638      | 10.100552      | 8.9625291      | 59.2747        | 46.975131      | 39.367269      | 5.581E-10 | 2.404213  | up        | PREDICTED: L-type lectin-domain containing receptor kinase VIII.1-like [Sesamum indicum]   |
| c18926.graph_c0 | 1.2811335      | 0.9075987      | 1.1579755      | 1.6489147      | 2.77904        | 2.7120865      | 0.0018093 | 1.125815  | up        | PREDICTED: BTB/POZ domain-containing protein At5g66560 [Sesamum indicum]                   |
| c18956.graph_c0 | 1.4440204      | 2.6459775      | 1.698151       | 5.1681944      | 3.7070822      | 4.8381402      | 0.0006883 | 1.2915    | up        | unnamed protein product [Coffea canephora]                                                 |
| c18979.graph_c0 | 0.4786971      | 0.201702       | 0.1041634      | 3.3170849      | 2.485547       | 3.1314931      | 9.303E-16 | 3.555924  | up        | PREDICTED: uncharacterized protein LOC105171076 [Sesamum indicum]                          |
| c18981.graph_c0 | 11.796301      | 12.974799      | 11.404979      | 26.642959      | 29.857041      | 31.084864      | 1.404E-14 | 1.315458  | up        | PREDICTED: carboxymethylenebutenoidase homolog [Sesamum indicum]                           |
| c19000.graph_c0 | 1.6096494      | 1.7359607      | 1.714796       | 0.3400582      | 0.3602504      | 0.1512909      | 1.01E-07  | -2.523908 | down      | -                                                                                          |
| c19001.graph_c0 | 1.1135032      | 1.279586       | 0.5782061      | 3.9777152      | 3.398312       | 2.3976222      | 7.75E-05  | 1.767303  | up        | V-type proton ATPase subunit B 1 [Aegilops tauschii]                                       |
| c19019.graph_c0 | 1.0263527      | 0.8340303      | 1.3818675      | 3.9029331      | 7.3735204      | 5.3828499      | 5.937E-07 | 2.393265  | up        | hypothetical protein CICLE_v10023425mg [Citrus clementina]                                 |
| c19029.graph_c0 | 36.632746      | 53.289006      | 53.639572      | 13.41447       | 13.573331      | 13.236845      | 7.753E-10 | -1.793447 | down      | -                                                                                          |
| c19035.graph_c0 | 4.991373       | 4.2828043      | 5.4136943      | 1.8076951      | 2.0399273      | 3.0071512      | 0.0023602 | -1.063359 | down      | PREDICTED: putative pectinesterase 11 [Sesamum indicum]                                    |
| c19039.graph_c0 | 2.7477878      | 2.8548432      | 3.5014747      | 16.365439      | 11.473889      | 9.5097919      | 4.466E-05 | 2.087355  | up        | PREDICTED: probable WRKY transcription factor 65 [Sesamum indicum]                         |
| c19070.graph_c0 | 41.747079      | 40.157339      | 40.188119      | 12.624109      | 12.824108      | 11.078981      | 9.259E-10 | -1.697873 | down      | -                                                                                          |
| c19087.graph_c0 | 0.4802827      | 0.6504754      | 0.326589       | 1.8263811      | 2.0423198      | 2.3925126      | 8.2E-07   | 2.142847  | up        | unnamed protein product [Coffea canephora]                                                 |

| #ID             | 28 h-1<br>FPKM | 28 h-2<br>FPKM | 28 h-3<br>FPKM | 48 h-1<br>FPKM | 48 h-2<br>FPKM | 48 h-3<br>FPKM | FDR       | log2FC    | regulated | nr_annotation                                                                                                                                                                  |
|-----------------|----------------|----------------|----------------|----------------|----------------|----------------|-----------|-----------|-----------|--------------------------------------------------------------------------------------------------------------------------------------------------------------------------------|
| c19088.graph_c0 | 53.50469       | 60.471269      | 61.427241      | 5.1625043      | 5.0758478      | 5.3441478      | 8.22E-103 | -3.450694 | down      | PREDICTED: LOW QUALITY PROTEIN: uncharacterized protein LOC105159096 [Sesamum indicum]                                                                                         |
| c19094.graph_c0 | 0.409021       | 0.2769807      | 0.2336305      | 30.719006      | 44.571636      | 45.60211       | 3.792E-67 | 7.073862  | up        | PREDICTED: endoglucanase 5-like [Sesamum indicum]                                                                                                                              |
| c19099.graph_c0 | 0.8606613      | 0.3586599      | 1.1074614      | 13.511016      | 22.759009      | 21.841249      | 4.645E-23 | 4.673913  | up        | RecName: Full=Caffeic acid 3-O-methyltransferase 2; Short=CAOMT-2; Short=COMT-2; AltName: Full=S-adenosyl-L-methionine:caffeic acid 3-O-methyltransferase 2 [Ocimum basilicum] |
| c19100.graph_c0 | 15.439164      | 15.069748      | 15.856395      | 36.6774        | 42.358308      | 44.254348      | 1.952E-22 | 1.449862  | up        | PREDICTED: protein notum homolog [Sesamum indicum]                                                                                                                             |
| c19173.graph_c0 | 9.7141543      | 10.023966      | 8.7654717      | 17.818606      | 22.155048      | 26.144624      | 1.93E-09  | 1.250809  | up        | PREDICTED: protein ECERIFERUM 26-like [Sesamum indicum]                                                                                                                        |
| c19181.graph_c0 | 1.675823       | 2.5755081      | 2.502157       | 0.5875527      | 0.8618412      | 0.9249554      | 0.0006772 | -1.473511 | down      | PREDICTED: myb-related protein 308-like [Sesamum indicum]                                                                                                                      |
| c19184.graph_c0 | 0.4179555      | 0.3564094      | 0.606308       | 1.9719937      | 1.4654798      | 1.5713446      | 7.659E-06 | 1.90576   | up        | PREDICTED: F-box protein At5g51370-like [Sesamum indicum]                                                                                                                      |
| c19213.graph_c0 | 0.0367591      | 0.03319        | 0.0299951      | 1.4910349      | 3.1097797      | 2.9851062      | 3.058E-13 | 6.276099  | up        | PREDICTED: acyl-CoA--sterol O-acyltransferase 1-like [Sesamum indicum]                                                                                                         |
| c19215.graph_c0 | 0.1421042      | 0.0320767      | 0.0579779      | 2.0714661      | 3.5779355      | 3.4459415      | 1.05E-19  | 5.324211  | up        | hypothetical protein MIMGU_mgv1a019872mg [Erythranthe guttata]                                                                                                                 |
| c19216.graph_c0 | 0.9610552      | 1.6716808      | 2.0989235      | 4.7115994      | 5.0103468      | 6.9181791      | 1.352E-08 | 1.851825  | up        | PREDICTED: DNA replication licensing factor MCM4 [Sesamum indicum]                                                                                                             |
| c19232.graph_c0 | 3.2139634      | 2.8505464      | 3.0867392      | 0.7210505      | 1.2221849      | 0.9623796      | 3.834E-05 | -1.621033 | down      | -                                                                                                                                                                              |
| c19235.graph_c0 | 5.7792185      | 4.9385518      | 5.642112       | 17.136637      | 17.599862      | 16.295654      | 7.631E-07 | 1.683307  | up        | hypothetical protein MIMGU_mgv1a003115mg [Erythranthe guttata]                                                                                                                 |
| c19248.graph_c0 | 1.2081862      | 1.8971806      | 0.8572783      | 1.997563       | 3.1037245      | 3.4955918      | 0.0060167 | 1.151946  | up        | hypothetical protein MIMGU_mgv1a014302mg [Erythranthe guttata]                                                                                                                 |
| c19281.graph_c0 | 363.86343      | 377.71238      | 385.79744      | 208.58597      | 162.49735      | 128.96906      | 6.589E-13 | -1.123529 | down      | PREDICTED: putative DNA-binding protein ESCAROLA [Sesamum indicum]                                                                                                             |
| c19282.graph_c0 | 12.331916      | 11.579946      | 12.322989      | 40.882676      | 62.264837      | 66.33482       | 5.402E-12 | 2.259603  | up        | PREDICTED: cytosolic sulfotransferase 12-like [Sesamum indicum]                                                                                                                |
| c19300.graph_c0 | 3.9974662      | 5.3786201      | 4.0294056      | 0.8941911      | 1.0525411      | 1.7681019      | 6.093E-05 | -1.81637  | down      | BnaC04g47180D [Brassica napus]                                                                                                                                                 |
| c19358.graph_c0 | 1.325731       | 1.6546914      | 1.7499475      | 4.7942585      | 4.1888128      | 5.4533185      | 8.151E-06 | 1.651914  | up        | hypothetical protein MIMGU_mgv1a000332mg [Erythranthe guttata]                                                                                                                 |
| c19359.graph_c0 | 35.634886      | 40.828916      | 30.080458      | 79.43662       | 71.282936      | 78.443412      | 7.227E-06 | 1.148866  | up        | V-type proton ATPase 16 kDa proteolipid subunit [Morus notabilis]                                                                                                              |
| c19372.graph_c0 | 1.2552546      | 1.7667351      | 1.1749066      | 0.6551702      | 0.6940734      | 0.4164047      | 0.0069075 | -1.203533 | down      | hypothetical protein MIMGU_mgv1a021776mg [Erythranthe guttata]                                                                                                                 |
| c19374.graph_c0 | 7.8682716      | 8.2793249      | 7.9234504      | 3.5529413      | 3.1455538      | 4.0646389      | 2.079E-06 | -1.118957 | down      | PREDICTED: pentatricopeptide repeat-containing protein At1g77360, mitochondrial-like [Sesamum indicum]                                                                         |
| c19386.graph_c0 | 1.468294       | 1.5856792      | 1.1511309      | 0.2919484      | 0.4252653      | 0.2273022      | 3.662E-06 | -2.11477  | down      | PREDICTED: probable (S)-N-methylcoclaurine 3'-hydroxylase isozyme 2 [Sesamum indicum]                                                                                          |
| c19389.graph_c0 | 3.1566752      | 2.7806651      | 2.355934       | 5.1236392      | 5.5312626      | 6.1654823      | 0.0016961 | 1.060205  | up        | PREDICTED: probable receptor-like serine/threonine-protein kinase At4g34500 [Sesamum indicum]                                                                                  |
| c19401.graph_c0 | 1.9515801      | 1.8993999      | 1.7992882      | 3.0841827      | 5.5816676      | 7.6897215      | 0.0061701 | 1.56318   | up        | PREDICTED: glucuronoxylan 4-O-methyltransferase 1-like [Sesamum indicum]                                                                                                       |
| c19406.graph_c0 | 1.0913711      | 1.7361912      | 1.3428927      | 6.3899594      | 6.1645622      | 7.561458       | 1.67E-19  | 2.311501  | up        | hypothetical protein MIMGU_mgv1a001005mg [Erythranthe guttata]                                                                                                                 |
| c19414.graph_c0 | 1.6681147      | 1.5947483      | 1.2410649      | 2.5497879      | 4.4141415      | 5.3122793      | 0.0009615 | 1.478221  | up        | -                                                                                                                                                                              |

| #ID             | 28 h-1<br>FPKM | 28 h-2<br>FPKM | 28 h-3<br>FPKM | 48 h-1<br>FPKM | 48 h-2<br>FPKM | 48 h-3<br>FPKM | FDR       | log2FC    | regulated | nr_annotation                                                                            |
|-----------------|----------------|----------------|----------------|----------------|----------------|----------------|-----------|-----------|-----------|------------------------------------------------------------------------------------------|
| c19428.graph_c0 | 0.5013553      | 0.5718024      | 0.3229752      | 1.3713525      | 2.1614557      | 3.8987557      | 0.0037835 | 2.442859  | up        | PREDICTED: uncharacterized protein LOC105159979 [Sesamum indicum]                        |
| c19433.graph_c0 | 175.36319      | 160.88837      | 135.48992      | 355.73398      | 399.13138      | 358.65299      | 5.253E-16 | 1.280119  | up        | PREDICTED: GDSL esterase/lipase At1g71250 [Sesamum indicum]                              |
| c19453.graph_c0 | 10.614269      | 10.017123      | 11.620748      | 19.809698      | 24.13745       | 32.305315      | 1.798E-05 | 1.277126  | up        | PREDICTED: protein ECERIFERUM 1-like [Sesamum indicum]                                   |
| c19468.graph_c0 | 5.5488619      | 5.4056364      | 4.795921       | 13.65072       | 17.157454      | 18.940037      | 3.334E-14 | 1.696483  | up        | PREDICTED: probable sugar phosphate/phosphate translocator At1g12500 [Sesamum indicum]   |
| c19480.graph_c0 | 0.0369515      | 0.0667274      | 0.1809125      | 10.960254      | 16.275332      | 15.462088      | 1.991E-57 | 7.262247  | up        | PREDICTED: peroxidase 44 [Sesamum indicum]                                               |
| c19533.graph_c0 | 76.424183      | 81.26622       | 76.148522      | 36.237113      | 31.831135      | 25.047059      | 3.196E-19 | -1.281491 | down      | PREDICTED: shaggy-related protein kinase alpha [Sesamum indicum]                         |
| c19541.graph_c0 | 7.0463153      | 6.9434764      | 8.1722133      | 13.737626      | 14.409256      | 15.329999      | 7.898E-06 | 1.012551  | up        | PREDICTED: origin recognition complex subunit 1-like isoform X1 [Sesamum indicum]        |
| c19577.graph_c0 | 239.32842      | 250.90539      | 287.38666      | 26.94067       | 21.924693      | 19.103841      | 4.251E-86 | -3.468778 | down      | PREDICTED: reticulon-like protein B13 [Sesamum indicum]                                  |
| c19592.graph_c0 | 4.66605795     | 6.3962608      | 5.3241927      | 12.406018      | 15.020197      | 24.18023       | 0.0006429 | 1.690342  | up        | PREDICTED: protein WALLS ARE THIN 1-like [Nicotiana sylvestris]                          |
| c19595.graph_c0 | 0.7605263      | 0.5930452      | 0.6769999      | 3.3302617      | 2.8781121      | 4.9127513      | 3.872E-08 | 2.492972  | up        | PREDICTED: protein IQ-DOMAIN 1 [Sesamum indicum]                                         |
| c19602.graph_c0 | 7.2487448      | 5.9839423      | 5.0699285      | 10.238411      | 16.964812      | 17.052195      | 0.0012798 | 1.307138  | up        | -                                                                                        |
| c19602.graph_c1 | 75.689533      | 70.941249      | 71.751039      | 189.04439      | 199.83985      | 220.09955      | 2.65E-26  | 1.519767  | up        | PREDICTED: NAC domain-containing protein 100-like isoform X2 [Nicotiana tomentosiformis] |
| c19657.graph_c0 | 5.7536108      | 4.8304117      | 6.7952492      | 20.024108      | 27.583826      | 35.406964      | 1.002E-08 | 2.289717  | up        | PREDICTED: auxin-induced protein 15A [Sesamum indicum]                                   |
| c19688.graph_c0 | 1.5181074      | 2.3416273      | 1.2645708      | 2.7661998      | 3.6949194      | 3.6741861      | 0.0063517 | 1.02174   | up        | PREDICTED: transcription factor bHLH66-like isoform X2 [Sesamum indicum]                 |
| c19697.graph_c0 | 7.178556       | 6.851938       | 8.3680615      | 104.7725       | 147.34903      | 187.83986      | 7.089E-18 | 4.32955   | up        | PREDICTED: non-specific lipid-transfer protein 2-like [Sesamum indicum]                  |
| c19697.graph_c1 | 0.279481       | 2.0187614      | 1.5963797      | 21.255768      | 17.639028      | 26.163335      | 4.55E-17  | 4.10461   | up        | -                                                                                        |
| c19702.graph_c0 | 0.9463373      | 1.1582597      | 0.7035632      | 3.4387164      | 6.7210149      | 6.4041261      | 2.222E-07 | 2.591994  | up        | PREDICTED: putative UPF0481 protein At3g02645 [Sesamum indicum]                          |
| c19713.graph_c0 | 0.0851162      | 0.1793211      | 0.1620596      | 1.3306558      | 2.6669404      | 2.976024       | 1.371E-08 | 4.061003  | up        | PREDICTED: WAT1-related protein At3g18200 [Sesamum indicum]                              |
| c19722.graph_c0 | 72.316934      | 76.50246       | 72.927913      | 169.52796      | 159.36304      | 169.77073      | 3.844E-16 | 1.212031  | up        | hypothetical protein MIMGU_mgv1a026562mg [Erythranthe guttata]                           |
| c19728.graph_c0 | 2.9071727      | 2.0155516      | 1.9062556      | 5.5275832      | 6.134652       | 7.904588       | 1.355E-05 | 1.556751  | up        | PREDICTED: uncharacterized protein LOC105160245 [Sesamum indicum]                        |
| c19729.graph_c0 | 7.7297561      | 10.392173      | 8.3174741      | 1.6688961      | 1.4258009      | 1.8681927      | 2.604E-12 | -2.370333 | down      | hypothetical protein MIMGU_mgv1a012036mg [Erythranthe guttata]                           |
| c19739.graph_c0 | 7.8749836      | 8.4555773      | 8.5415822      | 18.836043      | 18.187699      | 17.262131      | 1.232E-12 | 1.169311  | up        | PREDICTED: 4-coumarate--CoA ligase-like 5 [Sesamum indicum]                              |
| c19740.graph_c0 | 3.4634524      | 3.7074729      | 3.7293511      | 0.5883748      | 1.4384117      | 1.7316839      | 0.0001953 | -1.50954  | down      | -                                                                                        |
| c19746.graph_c0 | 213.46391      | 193.08538      | 247.66903      | 129.19278      | 79.069372      | 72.127185      | 8.927E-06 | -1.16942  | down      | PREDICTED: 17.5 kDa class 1 heat shock protein-like [Sesamum indicum]                    |
| c19751.graph_c0 | 1.4421873      | 2.0462512      | 2.5637712      | 4.3090423      | 5.1643402      | 8.2686177      | 0.0013371 | 1.585885  | up        | PREDICTED: DNA replication licensing factor MCM7 [Sesamum indicum]                       |
| c19821.graph_c0 | 2.5909867      | 3.1855906      | 1.3045212      | 0.279512       | 0.4441637      | 0.2487081      | 0.0002065 | -2.82573  | down      | PREDICTED: uncharacterized protein LOC105163656 [Sesamum indicum]                        |
| c19836.graph_c0 | 26.9439        | 20.130075      | 21.813563      | 1.0045111      | 0.8513262      | 0.5362848      | 2.662E-46 | -4.798635 | down      | PREDICTED: gibberellin 2-beta-dioxygenase [Sesamum indicum]                              |

| #ID             | 28 h-1<br>FPKM | 28 h-2<br>FPKM | 28 h-3<br>FPKM | 48 h-1<br>FPKM | 48 h-2<br>FPKM | 48 h-3<br>FPKM | FDR       | log2FC    | regulated | nr_annotation                                                                                     |
|-----------------|----------------|----------------|----------------|----------------|----------------|----------------|-----------|-----------|-----------|---------------------------------------------------------------------------------------------------|
| c19853.graph_c0 | 12.597554      | 12.44795       | 11.388302      | 2.4042202      | 5.7021935      | 6.7690039      | 7.757E-07 | -1.265137 | down      | PREDICTED: probable LRR receptor-like serine/threonine-protein kinase At4g36180 [Sesamum indicum] |
| c19875.graph_c0 | 17.083538      | 15.321311      | 16.434887      | 39.094624      | 69.02669       | 81.383238      | 3.623E-05 | 1.987045  | up        | PREDICTED: vestitone reductase-like [Sesamum indicum]                                             |
| c19877.graph_c0 | 3.0211067      | 2.3105868      | 2.9292358      | 6.442529       | 7.6364512      | 10.663296      | 2.458E-06 | 1.618345  | up        | PREDICTED: putative phospholipid-transporting ATPase 4 isoform XI [Sesamum indicum]               |
| c19884.graph_c0 | 25.930676      | 26.431047      | 26.449025      | 8.7950365      | 10.269405      | 9.7108103      | 2.423E-11 | -1.413963 | down      | PREDICTED: uncharacterized protein LOC105166661 [Sesamum indicum]                                 |
| c19931.graph_c0 | 31.853033      | 35.319669      | 28.271798      | 15.178972      | 16.401886      | 14.271507      | 3.835E-09 | -1.015533 | down      | PREDICTED: chaperone protein dnaJ 72 [Sesamum indicum]                                            |
| c19932.graph_c0 | 8.7538767      | 6.9693436      | 7.0224315      | 0.9746648      | 2.9784783      | 4.3028984      | 0.0001093 | -1.438579 | down      | PREDICTED: uncharacterized protein LOC105155205 [Sesamum indicum]                                 |
| c19933.graph_c0 | 1.5952281      | 2.382103       | 1.4518884      | 0.6221751      | 0.6591191      | 0.5536077      | 0.0008318 | -1.521772 | down      | -                                                                                                 |
| c19942.graph_c0 | 0.0956864      | 0.3023856      | 0.1951984      | 2.1225682      | 1.9273745      | 2.536185       | 8.042E-13 | 3.514976  | up        | PREDICTED: cell division cycle-associated 7-like protein isoform XI [Sesamum indicum]             |
| c19944.graph_c0 | 8.0590887      | 8.4004009      | 9.2929386      | 1.0254931      | 1.1281696      | 0.9124776      | 3.754E-21 | -3.028418 | down      | PREDICTED: F-box/keich-repeat protein At1g25390-like [Sesamum indicum]                            |
| c19957.graph_c0 | 3.8731015      | 3.384757       | 3.4938579      | 11.417829      | 13.431832      | 16.191102      | 2.682E-19 | 1.969937  | up        | PREDICTED: probable beta-D-xylosidase 7 [Sesamum indicum]                                         |
| c19973.graph_c0 | 1.5405475      | 1.3909699      | 1.1852414      | 3.235998       | 4.5511613      | 5.014078       | 1.624E-05 | 1.67207   | up        | unnamed protein product [Coffea canephora]                                                        |
| c19987.graph_c0 | 33.011363      | 30.519475      | 34.557641      | 14.269991      | 15.723533      | 14.829489      | 2.755E-12 | -1.089312 | down      | PREDICTED: uncharacterized protein LOC105165285 [Sesamum indicum]                                 |
| c19990.graph_c0 | 4.9102607      | 3.5668048      | 4.8201295      | 0.7019681      | 0.9419568      | 0.2914833      | 1.764E-11 | -2.737363 | down      | PREDICTED: benzoate carboxyl methyltransferase-like [Sesamum indicum]                             |
| c20002.graph_c0 | 1.0844724      | 0.7663124      | 0.615597       | 1.79302        | 4.3688206      | 4.945797       | 0.0016387 | 2.198414  | up        | hypothetical protein MIMGU_mgv1a021791mg [Erythranthe guttata]                                    |
| c20009.graph_c0 | 0.0775211      | 0.2799772      | 0.316283       | 2.8496477      | 4.9967276      | 4.8088954      | 1.891E-14 | 4.263357  | up        | -                                                                                                 |
| c20017.graph_c0 | 1.0968194      | 1.4029605      | 1.3424935      | 7.41493        | 5.0322498      | 4.5359601      | 1.58E-05  | 2.195312  | up        | hypothetical protein MIMGU_mgv1a022198mg, partial [Erythranthe guttata]                           |
| c20019.graph_c0 | 2.9980402      | 2.3846933      | 1.8639058      | 6.1527643      | 3.834181       | 4.9111213      | 0.0081062 | 1.089623  | up        | PREDICTED: uncharacterized protein LOC105161151 [Sesamum indicum]                                 |
| c20054.graph_c0 | 0.0785333      | 0.2363607      | 0.0854434      | 3.152313       | 4.3589177      | 4.0154489      | 7.036E-27 | 4.886117  | up        | PREDICTED: uncharacterized protein LOC105118921 [Sesamum indicum]                                 |
| c20067.graph_c0 | 5.7590722      | 5.9148888      | 4.8755818      | 1.0950072      | 1.5467032      | 1.9486617      | 2.787E-05 | -1.815772 | down      | PREDICTED: G-type lectin S-receptor-like serine/threonine-protein kinase SD1-1 [Nelumbo nucifera] |
| c20076.graph_c0 | 9.4695723      | 11.411673      | 10.500123      | 3.9688596      | 4.8710967      | 6.244668       | 0.0002775 | -1.020479 | down      | hypothetical protein MIMGU_mgv1a023657mg [Erythranthe guttata]                                    |
| c20081.graph_c0 | 0.6920564      | 0.803394       | 1.2100979      | 6.7672214      | 8.6294126      | 10.035721      | 2.193E-13 | 3.268235  | up        | PREDICTED: aquaporin TIP1-3-like [Sesamum indicum]                                                |
| c20082.graph_c0 | 0.0452377      | 0.1225362      | 0.0738272      | 4.3006574      | 3.64482        | 3.5715858      | 2.06E-23  | 5.621604  | up        | PREDICTED: ras-related protein Rab7-like [Sesamum indicum]                                        |
| c20085.graph_c0 | 16.59126       | 19.510589      | 18.913478      | 1.5216978      | 1.4880501      | 1.1804081      | 1.885E-50 | -3.670203 | down      | PREDICTED: UDP-glycosyltransferase 86A1-like [Sesamum indicum]                                    |
| c20086.graph_c0 | 8.6650383      | 6.6993506      | 8.8911743      | 3.5515749      | 3.0657106      | 3.686865       | 0.0005689 | -1.192152 | down      | -                                                                                                 |
| c20092.graph_c0 | 2.398767       | 1.7417769      | 1.820495       | 0.5315759      | 0.8334474      | 1.3622198      | 0.0056589 | -1.09764  | down      | PREDICTED: pentatricopeptide repeat-containing protein At4g20770 [Sesamum indicum]                |
| c20108.graph_c0 | 0.5758538      | 0.4963083      | 0.5980444      | 2.1234536      | 2.5307343      | 3.1293787      | 1.737E-08 | 2.257145  | up        | PREDICTED: F-box protein At1g10780 [Sesamum indicum]                                              |

| #ID             | 28 h-1<br>FPKM | 28 h-2<br>FPKM | 28 h-3<br>FPKM | 48 h-1<br>FPKM | 48 h-2<br>FPKM | 48 h-3<br>FPKM | FDR       | log2FC    | regulated | nr_annotation                                                                                     |
|-----------------|----------------|----------------|----------------|----------------|----------------|----------------|-----------|-----------|-----------|---------------------------------------------------------------------------------------------------|
| c20125.graph_c0 | 2.3028186      | 1.5288451      | 1.768547       | 19.402713      | 20.100069      | 26.660538      | 3.068E-32 | 3.601253  | up        | PREDICTED: glycine cleavage system H protein 3, mitochondrial-like [Sesamum indicum]              |
| c20131.graph_c0 | 14.434312      | 12.954906      | 12.817023      | 33.885546      | 53.947846      | 59.231567      | 1.106E-07 | 1.904087  | up        | PREDICTED: protein ASPARTIC PROTEASE IN GUARD CELL 2 [Sesamum indicum]                            |
| c20135.graph_c0 | 4.014816       | 5.2384429      | 3.6926655      | 37.712105      | 40.917466      | 35.047964      | 1.237E-85 | 3.176767  | up        | PREDICTED: membrane protein of ER body-like protein [Sesamum indicum]                             |
| c20167.graph_c0 | 4.2041971      | 4.507745       | 4.7365539      | 0.9083743      | 1.5397         | 1.6165321      | 4.209E-07 | -1.693945 | down      | PREDICTED: pentatricopeptide repeat-containing protein At3g22690 [Sesamum indicum]                |
| c20172.graph_c0 | 19.885652      | 20.096287      | 21.032815      | 5.2857726      | 6.9295485      | 6.9372918      | 3.543E-19 | -1.634664 | down      | PREDICTED: ethylene-responsive transcription factor ERF008-like [Nelumbo nucifera]                |
| c20195.graph_c0 | 30.079384      | 30.616859      | 28.512389      | 72.764709      | 81.014775      | 71.443421      | 9.819E-21 | 1.377289  | up        | monodehydroascorbate reductase [Acanthus ebracteatus]                                             |
| c20200.graph_c0 | 2.1798841      | 2.0875177      | 2.2638861      | 3.7679504      | 5.4109529      | 5.5133283      | 0.003246  | 1.204794  | up        | PREDICTED: BAG family molecular chaperone regulator 1-like [Sesamum indicum]                      |
| c20213.graph_c0 | 3.3995111      | 3.157138       | 2.932486       | 5.2940748      | 6.7822878      | 8.2162254      | 0.0009311 | 1.132685  | up        | PREDICTED: cyclin-U2-1-like [Sesamum indicum]                                                     |
| c20225.graph_c0 | 7.2792925      | 7.8870224      | 6.557587       | 19.118426      | 16.343682      | 15.041021      | 2.813E-06 | 1.263458  | up        | -                                                                                                 |
| c20226.graph_c0 | 0.3013372      | 0.4988119      | 0.3073608      | 2.0689881      | 2.5627692      | 2.6906532      | 3.606E-11 | 2.76351   | up        | PREDICTED: probable LRR receptor-like serine/threonine-protein kinase At1g05700 [Sesamum indicum] |
| c20233.graph_c0 | 6.6019501      | 4.8570638      | 6.08547        | 1.2397715      | 2.9551222      | 2.0683899      | 0.0011698 | -1.456835 | down      | -                                                                                                 |
| c20244.graph_c0 | 0.2527847      | 0.2282409      | 0.1500148      | 1.8642809      | 1.7281071      | 3.4472476      | 1.713E-06 | 3.517303  | up        | PREDICTED: G2/mitotic-specific cyclin S15-1-like [Sesamum indicum]                                |
| c20256.graph_c0 | 0.4157465      | 0.6256335      | 0.6332587      | 1.5809679      | 1.8609375      | 2.5321243      | 7.268E-06 | 1.871224  | up        | PREDICTED: uncharacterized protein LOC101258386 [Solanum lycopersicum]                            |
| c20309.graph_c0 | 19.76643       | 20.908746      | 21.631424      | 6.8377324      | 9.1581676      | 10.082344      | 3.287E-09 | -1.220671 | down      | PREDICTED: probable 3-hydroxyisobutyrate dehydrogenase-like 3, mitochondrial [Sesamum indicum]    |
| c20315.graph_c0 | 28.352038      | 27.602355      | 28.903448      | 3.1457925      | 4.2919665      | 4.6227681      | 3.188E-42 | -2.779049 | down      | BnaA09g38920D [Brassica napus]                                                                    |
| c20322.graph_c0 | 0.6134338      | 0.484639       | 0.6882658      | 3.304683       | 4.9424625      | 6.4863685      | 1.605E-08 | 3.076267  | up        | PREDICTED: inorganic phosphate transporter 1-4-like [Sesamum indicum]                             |
| c20327.graph_c0 | 0.4392035      | 0.264373       | 0.3285209      | 2.6908265      | 2.0642308      | 2.146597       | 5.047E-10 | 2.788312  | up        | PREDICTED: putative HVA22-like protein g [Sesamum indicum]                                        |
| c20329.graph_c0 | 0.3860197      | 0.6970792      | 0.0524982      | 1.5494767      | 3.0237839      | 3.4830697      | 1.349E-05 | 2.859268  | up        | hypothetical protein M569_01834 [Genlisea aurea]                                                  |
| c20335.graph_c0 | 6.334582       | 9.2099157      | 7.5016293      | 42.659554      | 43.011514      | 49.719399      | 8.972E-59 | 2.59557   | up        | PREDICTED: perakine reductase-like [Sesamum indicum]                                              |
| c20375.graph_c0 | 5.0368605      | 6.0400639      | 4.5435175      | 15.238225      | 15.773162      | 16.643471      | 5.966E-21 | 1.650662  | up        | PREDICTED: exopolysaccharuronase [Sesamum indicum]                                                |
| c20382.graph_c0 | 25.304696      | 29.840697      | 27.404711      | 54.982472      | 77.517268      | 83.838146      | 4.723E-09 | 1.425268  | up        | PREDICTED: fasciclin-like arabinogalactan protein 1 [Sesamum indicum]                             |
| c20387.graph_c0 | 32.752339      | 29.539101      | 27.805465      | 128.1824       | 90.084888      | 69.362259      | 0.0009451 | 1.726606  | up        | PREDICTED: uncharacterized protein LOC101258345 [Sesamum indicum]                                 |
| c20394.graph_c0 | 16.89697       | 10.953298      | 12.020124      | 22.241929      | 32.580422      | 26.143316      | 0.0031828 | 1.05853   | up        | -                                                                                                 |
| c20408.graph_c0 | 2.1871289      | 2.1178718      | 2.4830321      | 6.7902411      | 9.6196259      | 13.263614      | 4.981E-06 | 2.161113  | up        | PREDICTED: aspartic proteinase nepenthesin-1 [Sesamum indicum]                                    |
| c20419.graph_c0 | 0.69508        | 0.7531105      | 1.361231       | 5.4626035      | 6.907024       | 9.5643903      | 2.259E-10 | 2.998778  | up        | PREDICTED: thymidine kinase [Sesamum indicum]                                                     |

| #ID             | 28 h-1<br>FPKM | 28 h-2<br>FPKM | 28 h-3<br>FPKM | 48 h-1<br>FPKM | 48 h-2<br>FPKM | 48 h-3<br>FPKM | FDR       | log2FC    | regulated | nr_annotation                                                                                     |
|-----------------|----------------|----------------|----------------|----------------|----------------|----------------|-----------|-----------|-----------|---------------------------------------------------------------------------------------------------|
| c20472.graph_c0 | 68.663915      | 66.211898      | 76.049111      | 53.047585      | 25.656958      | 14.325723      | 0.0053995 | -1.118583 | down      | PREDICTED: uncharacterized protein LOC105175062 [Sesamum indicum]                                 |
| c20493.graph_c0 | 0.8230203      | 1.4862203      | 0.9737879      | 5.0597084      | 4.807555       | 3.6666572      | 1.312E-07 | 2.08964   | up        | Uncharacterized protein F383_18135 [Gossypium arboreum]                                           |
| c20508.graph_c0 | 3.0095776      | 3.4028281      | 3.8274936      | 6.358102       | 9.9760262      | 10.397386      | 3.131E-06 | 1.417794  | up        | PREDICTED: cellulose synthase-like protein D3 isoform X1 [Sesamum indicum]                        |
| c20517.graph_c0 | 4.5777038      | 2.1417684      | 3.7353689      | 13.662431      | 19.335507      | 16.803537      | 9.88E-20  | 2.288011  | up        | PREDICTED: glyoxylate/hydroxypyruvate reductase HPR3 [Sesamum indicum]                            |
| c20528.graph_c0 | 0.7138039      | 0.5728871      | 0.5177406      | 8.9809686      | 7.4551937      | 6.2915884      | 1.386E-20 | 3.702466  | up        | PREDICTED: MLO-like protein 1 isoform X3 [Sesamum indicum]                                        |
| c20552.graph_c0 | 20.326213      | 18.965237      | 19.420484      | 9.7349627      | 6.7052802      | 4.3463597      | 5.04E-12  | -1.444352 | down      | hypothetical protein MIMGU_mgv1a010327mg [Erythranthe guttata]                                    |
| c20602.graph_c0 | 5.2369056      | 5.3354635      | 5.139476       | 18.344655      | 18.863748      | 21.072187      | 4.322E-20 | 1.931856  | up        | PREDICTED: anthocyanidin 3-O-glucosyltransferase 2-like [Sesamum indicum]                         |
| c20611.graph_c0 | 9.67864        | 9.7263513      | 9.6824802      | 0.9703811      | 2.7902886      | 4.5638931      | 1.002E-10 | -1.781406 | down      | -                                                                                                 |
| c20613.graph_c0 | 0.5762467      | 0.693729       | 0.9404252      | 4.8695674      | 7.4801385      | 9.9656972      | 5.625E-08 | 3.367348  | up        | hypothetical protein M569_01187, partial [Genlisea aurea]                                         |
| c20617.graph_c0 | 0.0299129      | 0.0540171      | 0.0610218      | 1.4029231      | 1.365722       | 0.9952762      | 5.004E-20 | 4.743554  | up        | PREDICTED: putative disease resistance protein At1g50180 [Sesamum indicum]                        |
| c20619.graph_c0 | 0.7128964      | 0.905918       | 0.7325333      | 4.7859911      | 6.098395       | 8.6659924      | 3.13E-10  | 3.090726  | up        | PREDICTED: G2/mitotic-specific cyclin-1-like [Sesamum indicum]                                    |
| c20625.graph_c0 | 1.7606635      | 2.5914517      | 1.8106193      | 26.750676      | 20.0155        | 16.893039      | 6.383E-12 | 3.418999  | up        | PREDICTED: probable anion transporter 5, chloroplastic [Sesamum indicum]                          |
| c20683.graph_c0 | 4.3442502      | 4.0721625      | 4.4107958      | 13.073056      | 10.77664       | 11.183491      | 2.536E-09 | 1.49511   | up        | PREDICTED: GDSL esterase/lipase At4g10955-like [Sesamum indicum]                                  |
| c20685.graph_c0 | 25.360112      | 23.36011       | 26.641224      | 11.415198      | 9.6663259      | 8.764385       | 4.611E-14 | -1.290115 | down      | PREDICTED: F-box/keich-repeat protein At5g45190 [Sesamum indicum]                                 |
| c20712.graph_c0 | 3.3977331      | 3.3771959      | 3.6345672      | 13.825437      | 16.678462      | 17.003522      | 5.221E-25 | 2.228524  | up        | PREDICTED: 8-hydroxygeraniol dehydrogenase [Sesamum indicum]                                      |
| c20717.graph_c0 | 5.6226536      | 3.3399533      | 4.3465636      | 9.5653554      | 19.273204      | 18.023709      | 0.0001034 | 1.846182  | up        | PREDICTED: zinc finger protein WIP2 [Sesamum indicum]                                             |
| c20718.graph_c0 | 1.8342944      | 2.2931943      | 2.7056983      | 0.089427       | 0              | 0.1591433      | 3.238E-14 | -4.734295 | down      | -                                                                                                 |
| c20731.graph_c0 | 2.0756973      | 2.3989248      | 2.540628       | 6.8934798      | 7.7487788      | 9.4113675      | 1.796E-08 | 1.815803  | up        | hypothetical protein MIMGU_mgv1a005057mg [Erythranthe guttata]                                    |
| c20761.graph_c0 | 3.3295407      | 3.5011966      | 3.975919       | 5.3270163      | 8.0424237      | 10.029453      | 0.0015345 | 1.147318  | up        | PREDICTED: inorganic phosphate transporter 2-1, chloroplastic-like [Sesamum indicum]              |
| c20765.graph_c0 | 0.9142382      | 0.6390746      | 0.6738163      | 1.3083952      | 1.7029057      | 2.3949302      | 0.0013439 | 1.313881  | up        | PREDICTED: uncharacterized protein LOC105172642 [Sesamum indicum]                                 |
| c20793.graph_c0 | 188.82402      | 200.57692      | 201.60241      | 39.412819      | 64.862046      | 78.504108      | 5.893E-29 | -1.661167 | down      | PREDICTED: aquaporin AQPcic-like [Sesamum indicum]                                                |
| c20835.graph_c0 | 0.524342       | 0.6886279      | 0.466755       | 1.7824493      | 2.0163085      | 1.8817099      | 1.242E-05 | 1.798745  | up        | unnamed protein product [Coffea canephora]                                                        |
| c20837.graph_c0 | 1.7948231      | 2.3122582      | 1.857492       | 0.5271505      | 0.7348053      | 1.2837304      | 0.0043602 | -1.196323 | down      | PREDICTED: pentatricopeptide repeat-containing protein At1g71060, mitochondrial [Sesamum indicum] |
| c20843.graph_c0 | 1.8014931      | 2.6131931      | 2.1206611      | 5.5777912      | 5.9883087      | 5.4294152      | 8.965E-06 | 1.420723  | up        | PREDICTED: aldo-keto reductase [Sesamum indicum]                                                  |
| c20850.graph_c0 | 7.9598649      | 10.697431      | 8.9543443      | 4.1408657      | 4.6956708      | 4.5407785      | 1.336E-05 | -1.005218 | down      | PREDICTED: uncharacterized protein LOC105161748 [Sesamum indicum]                                 |



| #ID             | 28 h-1<br>FPKM | 28 h-2<br>FPKM | 28 h-3<br>FPKM | 48 h-1<br>FPKM | 48 h-2<br>FPKM | 48 h-3<br>FPKM | FDR       | log2FC    | regulated | nr_annotation                                                                                 |
|-----------------|----------------|----------------|----------------|----------------|----------------|----------------|-----------|-----------|-----------|-----------------------------------------------------------------------------------------------|
| c20853.graph_c0 | 1.3533704      | 1.3252314      | 1.1198933      | 2.6336499      | 2.9692091      | 2.5153989      | 0.001108  | 1.137164  | up        | PREDICTED: B3 domain-containing protein Os01g0234100-like [Sesamum indicum]                   |
| c20865.graph_c0 | 0.8749144      | 0.6869267      | 1.034671       | 3.584219       | 4.5802925      | 4.9768939      | 1.444E-18 | 2.375663  | up        | PREDICTED: 125 kDa kinesin-related protein [Sesamum indicum]                                  |
| c20872.graph_c0 | 18.087464      | 21.165345      | 22.197872      | 36.866927      | 84.038491      | 92.862979      | 0.0024671 | 1.826359  | up        | hypothetical protein MIMGU_mgv1a013356mg [Erythranthe guttata]                                |
| c20878.graph_c0 | 0.2556392      | 0.3173751      | 0.3520117      | 2.2075331      | 1.7593241      | 1.9462291      | 7.284E-12 | 2.721939  | up        | PREDICTED: protein CHUP1, chloroplastic-like [Sesamum indicum]                                |
| c20900.graph_c0 | 1.261541       | 1.0315954      | 1.3595943      | 86.954621      | 100.49223      | 95.922651      | 1.67E-259 | 6.31685   | up        | PREDICTED: raucatriicine-O-beta-D-glucosidase-like [Sesamum indicum]                          |
| c20941.graph_c0 | 0.9336581      | 1.0838645      | 0.5986022      | 3.7195098      | 2.7313926      | 3.0839431      | 1.485E-06 | 1.914036  | up        | PREDICTED: protein tesmin/TSO1-like CXC 2 isoform X3 [Sesamum indicum]                        |
| c20944.graph_c0 | 822.87573      | 952.81593      | 928.70749      | 101.06855      | 145.27583      | 196.14017      | 3.746E-57 | -2.57837  | down      | PREDICTED: 18 kDa seed maturation protein-like [Nicotiana glauca]                             |
| c21008.graph_c0 | 1.0594945      | 0.7652993      | 0.7163322      | 1.2278741      | 2.235722       | 1.8778289      | 0.0085229 | 1.104559  | up        | hypothetical protein MIMGU_mgv1a020944mg, partial [Erythranthe guttata]                       |
| c21037.graph_c0 | 0.3988677      | 1.0804203      | 1.3018911      | 24.1674        | 37.493099      | 35.720046      | 1.58E-35  | 5.163841  | up        | PREDICTED: defensin J1-2-like [Sesamum indicum]                                               |
| c21058.graph_c1 | 4.4448169      | 4.5149096      | 4.1558622      | 0.3521333      | 0.248695       | 0.3133261      | 1.779E-12 | -3.79555  | down      | -                                                                                             |
| c21062.graph_c0 | 7.3763836      | 5.564758       | 5.9002713      | 3.4447772      | 2.1504943      | 1.2588976      | 0.0001021 | -1.402273 | down      | -                                                                                             |
| c21068.graph_c0 | 146.82512      | 140.36375      | 142.03978      | 59.94759       | 67.315731      | 60.058613      | 3.179E-14 | -1.155428 | down      | PREDICTED: LOW QUALITY PROTEIN: protein SENSITIVE TO PROTON RHIZOTOXICITY 1 [Sesamum indicum] |
| c21075.graph_c0 | 0.512621       | 0.1322425      | 0.5577261      | 1.4233384      | 2.7862528      | 2.3126989      | 1.583E-06 | 2.469118  | up        | PREDICTED: uncharacterized protein LOC105162896 [Sesamum indicum]                             |
| c21084.graph_c0 | 0.356812       | 0.2478213      | 0.3135522      | 3.4791188      | 4.3859884      | 5.0459893      | 1.332E-21 | 3.849998  | up        | PREDICTED: 65-kDa microtubule-associated protein 5 [Sesamum indicum]                          |
| c21092.graph_c0 | 1.1425767      | 0.8144523      | 0.8341929      | 1.8294317      | 3.3108542      | 1.8312944      | 0.0073224 | 1.355621  | up        | PREDICTED: uncharacterized protein LOC105166030 [Sesamum indicum]                             |
| c21110.graph_c0 | 2.9327612      | 3.741751       | 4.0058567      | 0.5657051      | 0.7705234      | 0.6471785      | 1.816E-07 | -2.391442 | down      | PREDICTED: uncharacterized protein At1g08160-like [Sesamum indicum]                           |
| c21119.graph_c0 | 20.026317      | 18.859602      | 16.648809      | 39.919695      | 43.519019      | 40.984967      | 3.702E-12 | 1.204967  | up        | Signal peptidase complex catalytic subunit SEC11C [Gossypium arboreum]                        |
| c21157.graph_c0 | 6.870051       | 6.4169089      | 7.216798       | 2.6024792      | 2.3328556      | 3.1172485      | 0.0015358 | -1.306955 | down      | PREDICTED: transcription factor PRE6-like [Solanum lycopersicum]                              |
| c21161.graph_c0 | 0.868767       | 1.8085128      | 1.0239765      | 0.1223585      | 0.129624       | 0.0816554      | 2.203E-05 | -3.426085 | down      | PREDICTED: probable 9-cis-epoxycarotenoid dioxygenase NCED5, chloroplastic [Sesamum indicum]  |
| c21182.graph_c0 | 5.0881154      | 5.1391529      | 4.0111196      | 0.8198595      | 1.9107917      | 2.0912506      | 0.0001199 | -1.534019 | down      | -                                                                                             |
| c21195.graph_c0 | 0.8293658      | 0.7488395      | 0.7422482      | 1.7634411      | 3.161488       | 3.3192485      | 1.061E-05 | 1.860548  | up        | PREDICTED: glucan endo-1,3-beta-glucosidase 13 [Sesamum indicum]                              |
| c21202.graph_c0 | 0.7981159      | 1.325018       | 1.050413       | 14.130755      | 8.5739396      | 8.9146711      | 4.673E-08 | 3.369274  | up        | hypothetical protein MIMGU_mgv1a027064mg [Erythranthe guttata]                                |
| c21212.graph_c0 | 3.4965387      | 3.9139993      | 3.8208811      | 9.3307796      | 14.607581      | 15.24426       | 8.056E-09 | 1.836413  | up        | PREDICTED: protein LUTEIN DEFICIENT 5, chloroplastic [Sesamum indicum]                        |
| c21236.graph_c0 | 27.284699      | 29.386105      | 28.856515      | 4.2639491      | 6.7177936      | 5.7072683      | 1.57E-39  | -2.322489 | down      | PREDICTED: probable purine permease 9 [Sesamum indicum]                                       |
| c21242.graph_c0 | 9.2025205      | 10.783388      | 10.090463      | 18.633776      | 20.308127      | 24.727236      | 4.718E-12 | 1.120843  | up        | PREDICTED: probable inactive receptor kinase At4g23740 [Sesamum indicum]                      |

| #ID             | 28 h-1<br>FPKM | 28 h-2<br>FPKM | 28 h-3<br>FPKM | 48 h-1<br>FPKM | 48 h-2<br>FPKM | 48 h-3<br>FPKM | FDR       | log2FC    | regulated | nr_annotation                                                                                                |
|-----------------|----------------|----------------|----------------|----------------|----------------|----------------|-----------|-----------|-----------|--------------------------------------------------------------------------------------------------------------|
| c21243.graph_c0 | 2.2649124      | 1.4157717      | 1.9903155      | 0.2944557      | 1.1697755      | 0.4585086      | 0.0021556 | -1.536279 | down      | PREDICTED: uncharacterized protein DDB_G0284459-like isoform X1 [Sesamum indicum]                            |
| c21247.graph_c0 | 5.8990784      | 5.891941       | 5.4951714      | 12.936765      | 14.791514      | 16.810263      | 8.923E-13 | 1.404047  | up        | PREDICTED: uncharacterized protein LOC105161548 [Sesamum indicum]                                            |
| c21248.graph_c0 | 2.2314319      | 2.5184673      | 2.5795095      | 6.2168168      | 7.366291       | 8.0222559      | 1.8E-09   | 1.597758  | up        | PREDICTED: phosphatidylinositol/phosphatidylcholine transfer protein SFH13-like isoform X1 [Sesamum indicum] |
| c21257.graph_c0 | 63.516393      | 63.821257      | 66.129972      | 262.28014      | 244.97221      | 269.12461      | 3.146E-43 | 2.04726   | up        | PREDICTED: tubulin beta chain-like [Sesamum indicum]                                                         |
| c21269.graph_c0 | 4.3666751      | 4.7312379      | 6.6987619      | 9.9631482      | 12.665697      | 19.306325      | 0.002068  | 1.442082  | up        | hypothetical protein MIMGU_mgv1a022119mg, partial [Erythranthe guttata]                                      |
| c21292.graph_c0 | 31.814834      | 35.774809      | 32.789107      | 173.17927      | 130.80477      | 112.48421      | 1.943E-07 | 2.102189  | up        | PREDICTED: cytochrome P450 71D95-like [Sesamum indicum]                                                      |
| c21328.graph_c0 | 23.048331      | 27.33926       | 25.998257      | 244.03499      | 214.5276       | 168.97229      | 2.583E-17 | 3.085192  | up        | F-box/WD repeat-containing protein 4 [Theobroma cacao]                                                       |
| c21337.graph_c0 | 4.5938492      | 4.5384165      | 4.0006876      | 13.682843      | 14.467651      | 14.637776      | 1.852E-20 | 1.745188  | up        | PREDICTED: xylem cysteine proteinase 2-like [Sesamum indicum]                                                |
| c21343.graph_c0 | 2.7425774      | 2.6001047      | 2.6015828      | 0.9777428      | 1.2889955      | 1.5079821      | 0.0030836 | -1.037803 | down      | PREDICTED: putative pentatricopeptide repeat-containing protein At5g09950 [Sesamum indicum]                  |
| c21351.graph_c0 | 2.7194043      | 2.5657207      | 2.368608       | 10.108751      | 7.6727286      | 5.8586204      | 0.0002012 | 1.67736   | up        | PREDICTED: uncharacterized protein LOC105175540 [Sesamum indicum]                                            |
| c21408.graph_c0 | 94.82226       | 100.11249      | 109.24951      | 12.166897      | 12.733118      | 13.647362      | 8.517E-85 | -2.939747 | down      | PREDICTED: zinc finger CCCH domain-containing protein 20-like [Sesamum indicum]                              |
| c21437.graph_c0 | 125.46178      | 119.18766      | 129.8477       | 68.680507      | 48.873694      | 37.37888       | 1.565E-10 | -1.221836 | down      | PREDICTED: 7-deoxyloganetic acid glucosyltransferase-like [Sesamum indicum]                                  |
| c21505.graph_c0 | 2.2860927      | 1.3210415      | 1.7161983      | 5.8342189      | 7.2857963      | 7.3571398      | 1.168E-10 | 1.98114   | up        | PREDICTED: uncharacterized protein LOC105160466 [Sesamum indicum]                                            |
| c21528.graph_c0 | 1389.3835      | 1553.6872      | 1408.2496      | 638.56097      | 570.21918      | 588.41526      | 3.475E-10 | -1.231414 | down      | PREDICTED: thiamine thiazole synthase 2, chloroplastic-like [Populus euphratica]                             |
| c21536.graph_c0 | 4.8397998      | 5.4963448      | 4.7215324      | 18.349876      | 14.760132      | 13.901516      | 3.13E-10  | 1.689899  | up        | PREDICTED: protein TRANSPORT INHIBITOR RESPONSE 1-like [Sesamum indicum]                                     |
| c21546.graph_c0 | 3.8575881      | 6.0283391      | 2.7845572      | 7.1465972      | 21.716681      | 18.742313      | 0.0090833 | 1.936437  | up        | -                                                                                                            |
| c21554.graph_c0 | 6.8662223      | 6.1067935      | 5.993998       | 13.890781      | 15.98022       | 18.559213      | 1.107E-17 | 1.390659  | up        | PREDICTED: LRR receptor-like serine/threonine-protein kinase RCH1 [Sesamum indicum]                          |
| c21564.graph_c0 | 7.03375        | 5.6017461      | 6.033815       | 13.899498      | 11.576431      | 13.14067       | 5.049E-06 | 1.093119  | up        | PREDICTED: methylsterol monooxygenase 1-1-like [Sesamum indicum]                                             |
| c21570.graph_c0 | 0.8812101      | 0.5569551      | 1.4740735      | 14.744383      | 15.56072       | 17.293838      | 6.26E-40  | 4.069323  | up        | PREDICTED: uncharacterized protein LOC105175024 [Sesamum indicum]                                            |
| c21576.graph_c0 | 3.1548208      | 3.029365       | 3.2689626      | 7.4266544      | 9.6160043      | 10.16645       | 1.491E-06 | 1.561933  | up        | hypothetical protein MIMGU_mgv1a000209mg [Erythranthe guttata]                                               |
| c21578.graph_c0 | 36.819134      | 34.827285      | 37.01612       | 9.3592344      | 11.572996      | 11.196561      | 5.132E-29 | -1.719658 | down      | PREDICTED: LOW QUALITY PROTEIN: plasma membrane ATPase 1-like [Sesamum indicum]                              |
| c21582.graph_c0 | 9.4294029      | 11.222824      | 8.0440574      | 21.912848      | 24.940667      | 18.853361      | 0.0003157 | 1.23754   | up        | -                                                                                                            |
| c21590.graph_c0 | 8.1105019      | 9.558813       | 9.0779294      | 27.930639      | 27.468732      | 29.871589      | 8.884E-22 | 1.71447   | up        | hypothetical protein MIMGU_mgv1a025384mg [Erythranthe guttata]                                               |
| c21609.graph_c0 | 8.1827096      | 6.1012394      | 7.1078         | 1.6060161      | 2.6229597      | 1.0122249      | 8.824E-08 | -1.990695 | down      | PREDICTED: pathogenesis-related genes transcriptional activator PTI6 [Sesamum indicum]                       |

| #ID             | 28 h-1<br>FPKM | 28 h-2<br>FPKM | 28 h-3<br>FPKM | 48 h-1<br>FPKM | 48 h-2<br>FPKM | 48 h-3<br>FPKM | FDR       | log2FC    | regulated | nr_annotation                                                                          |
|-----------------|----------------|----------------|----------------|----------------|----------------|----------------|-----------|-----------|-----------|----------------------------------------------------------------------------------------|
| c21611.graph_c0 | 28.321322      | 35.119935      | 29.005668      | 9.2043758      | 16.43796       | 15.665159      | 1.213E-07 | -1.129698 | down      | PREDICTED: subtilisin-like protease SDD1 [Sesamum indicum]                             |
| c21617.graph_c0 | 4.7530277      | 4.630344       | 4.9603101      | 1.2366721      | 1.2093269      | 0.9310936      | 1.216E-09 | -2.041923 | down      | PREDICTED: probable galacturonosyltransferase-like 9 [Sesamum indicum]                 |
| c21618.graph_c0 | 0.4583266      | 0.6069447      | 0.523587       | 1.0457328      | 1.1898884      | 1.6197362      | 0.0023516 | 1.316137  | up        | PREDICTED: protein ODORANT1-like [Sesamum indicum]                                     |
| c21633.graph_c0 | 3.4189764      | 3.4562753      | 3.3504979      | 1.4515135      | 1.4498338      | 1.8266178      | 0.0005998 | -1.072767 | down      | PREDICTED: pentatricopeptide repeat-containing protein At5g39710 [Sesamum indicum]     |
| c21648.graph_c0 | 0.6249787      | 0.5642972      | 0.7285393      | 2.3766196      | 2.2779555      | 2.316102       | 1.709E-05 | 1.904243  | up        | PREDICTED: probable WRKY transcription factor 71 [Nicotiana tomentosiformis]           |
| c21653.graph_c0 | 0.2597932      | 0.2010591      | 0.4542624      | 3.6223772      | 3.5882831      | 3.3487475      | 2.689E-15 | 3.569947  | up        | PREDICTED: peroxidase 66-like [Sesamum indicum]                                        |
| c21657.graph_c0 | 0.4533451      | 0.6549249      | 0.6658666      | 9.0794423      | 14.184344      | 15.850875      | 6.306E-20 | 4.495718  | up        | PREDICTED: uncharacterized protein LOC105157568 [Sesamum indicum]                      |
| c21669.graph_c0 | 3.3136747      | 3.6568126      | 3.5852129      | 8.4628805      | 7.185501       | 6.8934736      | 1.395E-05 | 1.14044   | up        | PREDICTED: BTB/POZ domain-containing protein At3g19850-like [Sesamum indicum]          |
| c21672.graph_c0 | 3.103361       | 3.428817       | 2.7988769      | 6.1594065      | 8.4443044      | 9.2571527      | 7.566E-06 | 1.390436  | up        | PREDICTED: wall-associated receptor kinase-like 20 [Sesamum indicum]                   |
| c21695.graph_c0 | 0.6512895      | 0.49617        | 0.4151929      | 1.9349002      | 2.1044532      | 2.3185055      | 1.194E-07 | 2.064535  | up        | PREDICTED: uncharacterized protein LOC105168358 isoform X2 [Sesamum indicum]           |
| c21716.graph_c0 | 4.0507537      | 3.1733764      | 3.3539905      | 1.7367126      | 0.6399431      | 0.7390644      | 9.54E-05  | -1.70145  | down      | unnamed protein product [Vitis vinifera]                                               |
| c21718.graph_c0 | 0.8423482      | 0.9778647      | 0.8051805      | 3.2947355      | 4.0559424      | 5.4153828      | 1.07E-10  | 2.317862  | up        | PREDICTED: uncharacterized protein LOC105157238 isoform X1 [Sesamum indicum]           |
| c21720.graph_c0 | 0.5703676      | 1.0871978      | 0.6205537      | 1.847623       | 4.1699694      | 6.0756664      | 0.0049478 | 2.43585   | up        | PREDICTED: allene oxide synthase [Sesamum indicum]                                     |
| c21723.graph_c0 | 0.8941311      | 0.9477194      | 0.6502989      | 5.592969       | 5.2986331      | 8.3747024      | 3.205E-12 | 2.990133  | up        | PREDICTED: scarecrow-like protein 28 [Sesamum indicum]                                 |
| c21726.graph_c0 | 2.4494788      | 2.086462       | 2.4513029      | 0.9373267      | 0.868861       | 0.7037109      | 0.0002623 | -1.431884 | down      | PREDICTED: uncharacterized protein LOC105175588 [Sesamum indicum]                      |
| c21735.graph_c0 | 13.05009       | 16.126379      | 13.369255      | 3.0789761      | 3.837414       | 3.0619667      | 7.12E-13  | -2.052185 | down      | PREDICTED: RING-H2 finger protein ATL66 [Sesamum indicum]                              |
| c21746.graph_c0 | 2.7697768      | 2.3113905      | 2.2601152      | 0.6383447      | 1.2961436      | 0.80466        | 0.001494  | -1.389725 | down      | unnamed protein product [Coffea canephora]                                             |
| c21750.graph_c0 | 0.3853312      | 0.5025481      | 0.2096181      | 5.4813331      | 3.8520408      | 3.0422495      | 4.673E-08 | 3.548166  | up        | PREDICTED: uncharacterized protein LOC105162958 [Sesamum indicum]                      |
| c21769.graph_c0 | 23.895381      | 27.011582      | 23.950835      | 98.141634      | 100.81092      | 99.926009      | 1.933E-44 | 2.03922   | up        | p-coumaroyl shikimate 3&apos;-hydroxylase isoform 2 [Ocimum basilicum]                 |
| c21813.graph_c0 | 10.961336      | 9.4022055      | 9.6897238      | 24.315026      | 33.118484      | 32.040943      | 5.031E-10 | 1.610533  | up        | PREDICTED: probable receptor-like protein kinase At1g80640 [Nicotiana tomentosiformis] |
| c21818.graph_c0 | 2.0882465      | 2.5925499      | 1.8743913      | 0.7279267      | 0.630941       | 0.8243516      | 0.0007341 | -1.543162 | down      | -                                                                                      |
| c21827.graph_c0 | 0.7221872      | 0.8624117      | 0.7793953      | 3.0711049      | 5.2555945      | 5.9645356      | 5.203E-08 | 2.627747  | up        | PREDICTED: L-ascorbate oxidase-like [Sesamum indicum]                                  |
| c21859.graph_c0 | 4.9082616      | 4.7934715      | 4.273665       | 0.8706589      | 1.9984412      | 2.7114746      | 5.792E-06 | -1.297442 | down      | PREDICTED: oligopeptide transporter 4-like [Sesamum indicum]                           |
| c21871.graph_c0 | 0.229852       | 0.181593       | 0.3985594      | 3.0956399      | 6.0187647      | 5.8978316      | 4.258E-12 | 4.241463  | up        | hypothetical protein MIMGU_mgv1a006316mg [Erythranthe guttata]                         |
| c21881.graph_c0 | 2.5197226      | 3.8072654      | 2.0141124      | 6.8441441      | 6.5600131      | 6.1478771      | 0.000442  | 1.273613  | up        | PREDICTED: LOW QUALITY PROTEIN: alkaline/neutral invertase CINV2 [Sesamum indicum]     |

| #ID             | 28 h-1<br>FPKM | 28 h-2<br>FPKM | 28 h-3<br>FPKM | 48 h-1<br>FPKM | 48 h-2<br>FPKM | 48 h-3<br>FPKM | FDR       | log2FC    | regulated | nr_annotation                                                                    |
|-----------------|----------------|----------------|----------------|----------------|----------------|----------------|-----------|-----------|-----------|----------------------------------------------------------------------------------|
| c21891.graph_c0 | 0.5246852      | 0.7698299      | 0.8027603      | 2.6603083      | 2.8182741      | 1.7013721      | 6.457E-05 | 1.820199  | up        | hypothetical protein JCGZ_14180 [Jatropha curcas]                                |
| c21901.graph_c0 | 3.3176277      | 2.7426393      | 2.724736       | 47.187163      | 59.998464      | 57.926307      | 6.61E-131 | 4.270153  | up        | vacuolar invertase CvINV [Elsholtzia haichowensis]                               |
| c21908.graph_c0 | 4.4679313      | 3.2370584      | 4.6307483      | 1.2331666      | 1.0644664      | 0.7924686      | 4.014E-10 | -1.950015 | down      | PREDICTED: lysine-specific demethylase MJM18 [Sesamum indicum]                   |
| c21909.graph_c0 | 0.2830911      | 0.4089676      | 0.231          | 1.2918198      | 1.5585996      | 0.7024438      | 0.0011501 | 1.989367  | up        | hypothetical protein MIMGU_mgv1a0261841mg, partial [Erythranthe guttata]         |
| c21911.graph_c0 | 4.8720355      | 5.8295576      | 4.7512566      | 16.870106      | 20.637711      | 24.750146      | 7.523E-17 | 2.047555  | up        | PREDICTED: inositol monophosphatase 3-like [Sesamum indicum]                     |
| c21920.graph_c0 | 1.4203061      | 0.5209763      | 0.9778709      | 5.8511133      | 6.0197409      | 6.8082194      | 6.608E-13 | 2.717619  | up        | PREDICTED: WW domain-containing protein C11B10.08 [Sesamum indicum]              |
| c21921.graph_c0 | 0.9379721      | 0.8872295      | 0.656038       | 2.2080477      | 2.8789647      | 3.5263983      | 1.115E-05 | 1.831574  | up        | hypothetical protein MIMGU_mgv1a000635mg [Erythranthe guttata]                   |
| c21940.graph_c0 | 1.4807877      | 1.8067736      | 1.4042529      | 7.1021905      | 6.1266121      | 6.7257391      | 8.451E-10 | 2.133178  | up        | PREDICTED: uncharacterized protein LOC105161910 [Sesamum indicum]                |
| c21946.graph_c0 | 0.4839311      | 0.4733565      | 0.4387598      | 1.0905215      | 1.8231689      | 2.0468099      | 4.886E-06 | 1.86145   | up        | PREDICTED: receptor protein kinase CLAVATA1 [Sesamum indicum]                    |
| c21950.graph_c0 | 5.4640674      | 6.1804794      | 5.4222221      | 14.892401      | 17.631193      | 15.508608      | 3.34E-18  | 1.53293   | up        | PREDICTED: uncharacterized protein LOC105173886 [Sesamum indicum]                |
| c21976.graph_c0 | 53.660856      | 85.024137      | 62.571301      | 202.26104      | 188.06162      | 132.77661      | 4.514E-05 | 1.425053  | up        | PREDICTED: epidermis-specific secreted glycoprotein EP1-like [Sesamum indicum]   |
| c21983.graph_c0 | 0.8940829      | 0.4843638      | 0.4620574      | 3.0599531      | 5.3627284      | 7.5295191      | 1.043E-05 | 3.14574   | up        | PREDICTED: mitotic spindle checkpoint protein BUBR1 isoform X2 [Sesamum indicum] |
| c22011.graph_c0 | 192.68092      | 215.20662      | 215.42011      | 45.464077      | 41.863196      | 45.863164      | 7.401E-48 | -2.183503 | down      | PREDICTED: salt stress-induced hydrophobic peptide ESI3 [Solanum lycopersicum]   |
| c22045.graph_c0 | 0.9575412      | 0.6611417      | 0.666442       | 3.5520154      | 2.5527412      | 2.5252731      | 1.48E-07  | 1.966203  | up        | PREDICTED: receptor-like protein kinase HERK 1 [Sesamum indicum]                 |
| c22049.graph_c0 | 403.61613      | 389.22301      | 332.38593      | 926.8037       | 886.29552      | 741.86794      | 3.676E-11 | 1.227902  | up        | hypothetical protein MIMGU_mgv1a015271mg [Erythranthe guttata]                   |
| c22063.graph_c0 | 0.197907       | 0.1786915      | 0.3027948      | 5.8952514      | 8.5706831      | 6.3337337      | 6.661E-36 | 4.97253   | up        | PREDICTED: reticuline oxidase-like protein [Sesamum indicum]                     |
| c22065.graph_c0 | 1.5876037      | 2.0174584      | 1.7272956      | 0.2236005      | 0.5527145      | 0.4642363      | 9.106E-06 | -2.075349 | down      | -                                                                                |
| c22068.graph_c0 | 29.451223      | 29.864516      | 26.853523      | 58.007553      | 66.831818      | 79.77562       | 1.649E-13 | 1.285785  | up        | PREDICTED: glycerol-3-phosphate 2-O-acyltransferase 4 [Sesamum indicum]          |
| c22084.graph_c0 | 2.3904567      | 2.539245       | 2.2055726      | 3.5846043      | 4.6996111      | 5.779975       | 8.038E-05 | 1.014654  | up        | PREDICTED: uncharacterized protein LOC105169955 isoform X1 [Sesamum indicum]     |
| c22085.graph_c0 | 0.3397627      | 0.3579028      | 0.4043136      | 2.3687083      | 2.4903489      | 3.3690664      | 4.048E-17 | 2.938736  | up        | PREDICTED: WD repeat and HMG-box DNA-binding protein 1 [Sesamum indicum]         |
| c22097.graph_c0 | 12.498843      | 12.016107      | 11.120546      | 4.0801021      | 5.1565157      | 5.9021357      | 7.92E-10  | -1.198295 | down      | PREDICTED: MATE efflux family protein 5-like [Sesamum indicum]                   |
| c22099.graph_c0 | 0.1382222      | 0.2080029      | 0.0375961      | 5.2562062      | 4.5783908      | 4.3651446      | 3.48E-24  | 5.256874  | up        | PREDICTED: CBL-interacting serine/threonine-protein kinase 5 [Sesamum indicum]   |
| c22111.graph_c0 | 3.840598       | 3.4326726      | 4.558395       | 13.86711       | 14.377957      | 14.132821      | 1.691E-13 | 1.881756  | up        | PREDICTED: (DL)-glycerol-3-phosphatase 2 [Sesamum indicum]                       |
| c22114.graph_c0 | 0.7633248      | 0.9981672      | 1.0739082      | 3.770188       | 2.7216141      | 3.3843782      | 8.581E-07 | 1.846923  | up        | PREDICTED: uncharacterized protein LOC105171186 [Sesamum indicum]                |
| c22147.graph_c0 | 0.3941622      | 0.5338373      | 0.4288442      | 1.3531637      | 1.2350264      | 1.2225605      | 0.0002087 | 1.534246  | up        | PREDICTED: glutathione transferase GST 23-like [Sesamum indicum]                 |

| #ID             | 28 h-1<br>FPKM | 28 h-2<br>FPKM | 28 h-3<br>FPKM | 48 h-1<br>FPKM | 48 h-2<br>FPKM | 48 h-3<br>FPKM | FDR       | log2FC    | regulated | nr_annotation                                                                                                         |
|-----------------|----------------|----------------|----------------|----------------|----------------|----------------|-----------|-----------|-----------|-----------------------------------------------------------------------------------------------------------------------|
| c22176.graph_c0 | 2.0906329      | 1.8286566      | 1.412731       | 7.2047722      | 9.9135842      | 10.610918      | 9.057E-17 | 2.414761  | up        | hypothetical protein MIMGU_mgv1a009135mg [Erythranthe guttata]                                                        |
| c22183.graph_c0 | 4.8965933      | 5.1618833      | 4.5813196      | 14.330867      | 20.448976      | 18.794756      | 1.548E-19 | 1.90801   | up        | PREDICTED: malonyl-coenzyme:anthocyanin 5-O-glucoside-6&apos;&apos;&apos;-O-malonyltransferase-like [Sesamum indicum] |
| c22206.graph_c0 | 5.2906341      | 5.2292019      | 5.6454571      | 1.8650569      | 2.648415       | 2.8070544      | 1.19E-05  | -1.107794 | down      | hypothetical protein MIMGU_mgv1a010455mg [Erythranthe guttata]                                                        |
| c22209.graph_c0 | 0.2687127      | 0.0909834      | 0.1370421      | 0.8089563      | 0.7667815      | 1.1175911      | 1.437E-08 | 2.47818   | up        | PREDICTED: receptor-like protein kinase HSL1 [Sesamum indicum]                                                        |
| c22267.graph_c0 | 0.5783682      | 0.9399821      | 0.8023043      | 6.671431       | 7.9218942      | 8.6107505      | 1.427E-16 | 3.360195  | up        | PREDICTED: lipoxygenase homology domain-containing protein 1-like [Sesamum indicum]                                   |
| c22287.graph_c0 | 0.4834525      | 1.418665       | 0.9862333      | 3.830073       | 8.2772957      | 4.6348472      | 0.0003893 | 2.567819  | up        | -                                                                                                                     |
| c22291.graph_c0 | 5.0334542      | 4.3333541      | 5.0942729      | 8.7048698      | 12.208345      | 13.598705      | 9.382E-07 | 1.289726  | up        | PREDICTED: ras-related protein Rab7 [Sesamum indicum]                                                                 |
| c22340.graph_c0 | 1.0839533      | 1.4447598      | 1.7268752      | 0.490711       | 0.3465658      | 0.6112843      | 0.0006294 | -1.511807 | down      | PREDICTED: cytochrome P450 71A1-like [Sesamum indicum]                                                                |
| c22346.graph_c0 | 18.952761      | 20.587034      | 19.837839      | 61.313675      | 41.194131      | 35.390766      | 0.0066018 | 1.267522  | up        | PREDICTED: uncharacterized protein LOC105163060 [Sesamum indicum]                                                     |
| c22362.graph_c0 | 192.76588      | 195.97409      | 211.78415      | 37.431011      | 31.639995      | 26.226937      | 4.012E-70 | -2.608635 | down      | hypothetical protein MIMGU_mgv1a011867mg [Erythranthe guttata]                                                        |
| c22371.graph_c0 | 3.1248936      | 3.4663969      | 2.9141573      | 0.2263447      | 1.7983859      | 0.6042005      | 5.642E-05 | -1.835732 | down      | -                                                                                                                     |
| c22378.graph_c0 | 2.398669       | 2.1657732      | 3.0152912      | 5.1770498      | 8.5313769      | 7.3850363      | 8.247E-05 | 1.510107  | up        | PREDICTED: transcription factor PCL1 [Sesamum indicum]                                                                |
| c22389.graph_c0 | 5.5899405      | 6.0707486      | 5.885093       | 18.011454      | 17.79489       | 19.774079      | 2.278E-24 | 1.704947  | up        | PREDICTED: uncharacterized protein LOC105168855 [Sesamum indicum]                                                     |
| c22433.graph_c0 | 0.109542       | 0.1978124      | 0.2234635      | 2.7076254      | 3.9716319      | 3.15053        | 2.253E-16 | 4.24723   | up        | PREDICTED: dirigent protein 18-like [Sesamum indicum]                                                                 |
| c22443.graph_c0 | 2.0841194      | 1.2303844      | 1.3081726      | 3.0482018      | 4.1979602      | 2.8930897      | 0.0077042 | 1.171882  | up        | PREDICTED: uncharacterized protein LOC105175907 [Sesamum indicum]                                                     |
| c22488.graph_c0 | 1.1678977      | 1.3708527      | 1.2388934      | 2.812753       | 2.8229407      | 2.7003578      | 0.0071732 | 1.184489  | up        | PREDICTED: dehydration-responsive element-binding protein 3 [Sesamum indicum]                                         |
| c22518.graph_c0 | 1.4769632      | 1.4817325      | 2.3166428      | 18.222354      | 18.004194      | 24.117609      | 6.004E-35 | 3.554789  | up        | PREDICTED: DNA (cytosine-5)-methyltransferase CMT3 [Sesamum indicum]                                                  |
| c22524.graph_c0 | 1.4444384      | 1.9266479      | 1.8751248      | 10.902368      | 11.549737      | 17.069073      | 5.452E-13 | 2.950839  | up        | PREDICTED: uncharacterized protein LOC105161197 [Sesamum indicum]                                                     |
| c22526.graph_c0 | 0.1838963      | 0.5396337      | 0.5252026      | 2.5058479      | 1.8520758      | 1.6074498      | 2.106E-06 | 2.305784  | up        | hypothetical protein MIMGU_mgv1a014603mg [Erythranthe guttata]                                                        |
| c22529.graph_c1 | 10.238927      | 12.528285      | 14.145677      | 1.3426131      | 3.6032507      | 4.1016286      | 3.944E-11 | -2.002978 | down      | PREDICTED: CBS domain-containing protein CBSX5 [Sesamum indicum]                                                      |
| c22532.graph_c0 | 2.3166696      | 2.4016222      | 2.3804829      | 123.22631      | 132.09879      | 128.7107       | 8.39E-228 | 5.798538  | up        | unnamed protein product [Coffea canephora]                                                                            |
| c22540.graph_c0 | 3.9263768      | 3.3425701      | 3.2954311      | 1.8011898      | 1.506428       | 1.4761598      | 0.0060206 | -1.096987 | down      | PREDICTED: probable WRKY transcription factor 71 isoform X1 [Sesamum indicum]                                         |
| c22552.graph_c0 | 1.8571866      | 1.8488515      | 2.0691709      | 0.8903406      | 0.7993287      | 0.711655       | 0.0002831 | -1.220908 | down      | PREDICTED: pentatricopeptide repeat-containing protein At3g26540 [Sesamum indicum]                                    |
| c22564.graph_c0 | 3.4080893      | 2.3279574      | 2.780973       | 55.145793      | 86.118179      | 82.995112      | 3.669E-34 | 4.752739  | up        | PREDICTED: polygalacturonase-like [Sesamum indicum]                                                                   |
| c22577.graph_c0 | 4.9839689      | 3.9706382      | 3.2694509      | 1.6103553      | 2.3621208      | 1.1022188      | 0.0060997 | -1.228213 | down      | PREDICTED: uncharacterized protein LOC105177681 [Sesamum indicum]                                                     |
| c22578.graph_c0 | 0.6602346      | 0.59613        | 0.8260773      | 2.9570326      | 4.4920553      | 5.4112327      | 2.611E-09 | 2.659203  | up        | PREDICTED: cysteine-rich repeat secretory protein 60 [Sesamum indicum]                                                |

| #ID             | 28 h-1<br>FPKM | 28 h-2<br>FPKM | 28 h-3<br>FPKM | 48 h-1<br>FPKM | 48 h-2<br>FPKM | 48 h-3<br>FPKM | FDR       | log2FC    | regulated | nr_annotation                                                                        |
|-----------------|----------------|----------------|----------------|----------------|----------------|----------------|-----------|-----------|-----------|--------------------------------------------------------------------------------------|
| c22593.graph_c0 | 1.1487536      | 0.7053074      | 0.7873938      | 5.9992548      | 5.3682235      | 8.4476741      | 6.434E-13 | 2.947103  | up        | hypothetical protein MIMGU_mgv1a007264mg [Erythranthe guttata]                       |
| c22603.graph_c0 | 1.3002399      | 1.2702238      | 0.9914124      | 4.3230161      | 5.0376825      | 6.6594154      | 1.408E-12 | 2.206447  | up        | PREDICTED: uncharacterized protein LOC105179085 [Sesamum indicum]                    |
| c22634.graph_c0 | 1.1659143      | 2.1631054      | 2.5152832      | 6.1747135      | 7.2276668      | 10.77228       | 3.399E-06 | 2.083762  | up        | PREDICTED: DNA replication licensing factor MCM3 homolog 2 [Sesamum indicum]         |
| c22642.graph_c0 | 2.4371252      | 3.2273935      | 2.5189874      | 0.7208217      | 1.3090683      | 1.0078872      | 0.0021593 | -1.39609  | down      | -                                                                                    |
| c22666.graph_c0 | 0.1864232      | 0.1683227      | 0.0760599      | 8.1525263      | 9.1372863      | 11.564458      | 2.813E-27 | 6.10466   | up        | hypothetical protein OsI_01464 [Oryza sativa Indica Group]                           |
| c22670.graph_c0 | 1.0754378      | 0.8091829      | 0.4753388      | 3.8623904      | 7.8224333      | 6.418602       | 3.545E-08 | 2.971342  | up        | PREDICTED: pleckstrin homology domain-containing family A member 8 [Sesamum indicum] |
| c22683.graph_c0 | 1.6851897      | 1.5714558      | 1.9837523      | 5.3577642      | 5.6759015      | 6.1382965      | 2.574E-08 | 1.752252  | up        | PREDICTED: glycerate dehydrogenase HPR, peroxisomal [Sesamum indicum]                |
| c22704.graph_c0 | 5.6066352      | 5.7583275      | 4.9752783      | 1.7767058      | 1.7880941      | 3.003714       | 0.0030078 | -1.277311 | down      | -                                                                                    |
| c22756.graph_c0 | 0.9829997      | 0.8875565      | 1.1586173      | 7.4761468      | 10.046757      | 8.900438       | 2.01E-26  | 3.161856  | up        | PREDICTED: uncharacterized protein LOC105158455 [Sesamum indicum]                    |
| c22766.graph_c0 | 16.030125      | 14.298262      | 16.925311      | 4.4641028      | 6.0011608      | 5.8075307      | 7.537E-15 | -1.501399 | down      | PREDICTED: uncharacterized protein LOC104211575 [Nicotiana glauca]                   |
| c22770.graph_c0 | 1.3872102      | 2.2545374      | 1.2225084      | 6.8225576      | 7.0786483      | 7.3849396      | 7.828E-09 | 2.17171   | up        | PREDICTED: uncharacterized protein LOC105160016 [Sesamum indicum]                    |
| c22778.graph_c0 | 3.1343625      | 3.6651279      | 4.0670259      | 35.040869      | 45.677449      | 49.78233       | 8.709E-43 | 3.622369  | up        | PREDICTED: LOW QUALITY PROTEIN: 4-coumarate--CoA ligase 1-like [Sesamum indicum]     |
| c22778.graph_c1 | 3.2164838      | 3.6600666      | 3.5594223      | 38.872364      | 43.42892       | 46.117861      | 7.381E-80 | 3.66075   | up        | 4-coumarate coenzyme A ligase [Paulownia fortunei]                                   |
| c22797.graph_c0 | 2.4658752      | 3.295152       | 4.1852387      | 12.252659      | 16.556386      | 19.468469      | 6.891E-11 | 2.313907  | up        | PREDICTED: uncharacterized protein LOC105174672 [Sesamum indicum]                    |
| c22799.graph_c0 | 0.1676132      | 0.3178119      | 0.2598649      | 2.0608822      | 3.0160428      | 2.8735218      | 1.194E-18 | 3.450956  | up        | PREDICTED: uncharacterized protein LOC105170951 [Sesamum indicum]                    |
| c22827.graph_c0 | 0.3230577      | 0.3977602      | 0.6949783      | 8.115535       | 26.186653      | 36.900761      | 2.269E-05 | 5.674214  | up        | unnamed protein product [Coffea canephora]                                           |
| c22837.graph_c0 | 23.515631      | 23.591566      | 27.876717      | 3.5189757      | 2.8507685      | 2.725954       | 2.253E-48 | -2.996775 | down      | PREDICTED: cytochrome P450 86B1-like [Sesamum indicum]                               |
| c22838.graph_c0 | 5.3367878      | 6.7744114      | 5.1744977      | 2.3875664      | 2.2764034      | 1.4871096      | 8.328E-06 | -1.443688 | down      | PREDICTED: uncharacterized protein LOC105171100 [Sesamum indicum]                    |
| c22864.graph_c0 | 17.408692      | 16.35479       | 15.183047      | 69.059256      | 79.87964       | 86.647964      | 3.357E-44 | 2.305782  | up        | PREDICTED: NADPH--cytochrome P450 reductase-like [Sesamum indicum]                   |
| c22886.graph_c0 | 1.8002641      | 1.1307615      | 1.5648052      | 8.3837494      | 12.034785      | 14.036802      | 8.569E-15 | 2.971956  | up        | PREDICTED: alcohol dehydrogenase-like 4 [Sesamum indicum]                            |
| c22901.graph_c0 | 3.7689376      | 6.2520183      | 5.2210658      | 24.886952      | 42.842651      | 44.782813      | 1.659E-10 | 2.916445  | up        | PREDICTED: laccase-14-like [Sesamum indicum]                                         |
| c22914.graph_c0 | 2.6458664      | 1.464207       | 2.2286507      | 12.117065      | 13.180398      | 19.926877      | 1.904E-10 | 2.871154  | up        | PREDICTED: hexose carrier protein HEX6-like [Sesamum indicum]                        |
| c22923.graph_c0 | 7.8504986      | 7.6692694      | 8.2962209      | 16.721086      | 19.874202      | 20.539341      | 9.382E-07 | 1.300865  | up        | PREDICTED: uncharacterized protein LOC102582757 [Solanum tuberosum]                  |
| c22943.graph_c0 | 39.179571      | 32.664461      | 35.854441      | 9.1899743      | 9.9323435      | 6.1122384      | 3.258E-19 | -2.049337 | down      | PREDICTED: dof zinc finger protein DOF3.1-like [Sesamum indicum]                     |
| c22951.graph_c0 | 323.5922       | 379.26215      | 388.26932      | 22.31937       | 25.628834      | 28.284943      | 3.3E-104  | -3.800654 | down      | PREDICTED: 1-Cys peroxiredoxin [Phoenix dactylifera]                                 |
| c23062.graph_c0 | 2.8961325      | 3.7547801      | 2.9085791      | 0.0941298      | 1.3960672      | 1.0888294      | 5.107E-05 | -1.874641 | down      | -                                                                                    |
| c23065.graph_c0 | 0              | 0.0457413      | 0.0620073      | 1.573277       | 3.2313498      | 2.7140771      | 4.141E-15 | 6.154607  | up        | PREDICTED: beta-glucosidase 12-like [Sesamum indicum]                                |
| c23084.graph_c1 | 26.587377      | 18.24449       | 20.827279      | 9.4364084      | 11.266157      | 8.9295679      | 0.0006109 | -1.107466 | down      | PREDICTED: elongation of fatty acids protein 3-like [Populus euphratica]             |

| #ID             | 28 h-1<br>FPKM | 28 h-2<br>FPKM | 28 h-3<br>FPKM | 48 h-1<br>FPKM | 48 h-2<br>FPKM | 48 h-3<br>FPKM | FDR       | log2FC    | regulated | nr_annotation                                                                       |
|-----------------|----------------|----------------|----------------|----------------|----------------|----------------|-----------|-----------|-----------|-------------------------------------------------------------------------------------|
| c23103.graph_c0 | 8.4065243      | 6.6608783      | 6.4863406      | 10.728378      | 21.11817       | 23.929615      | 0.0037039 | 1.401519  | up        | PREDICTED: uncharacterized protein LOC105172657 [Sesamum indicum]                   |
| c23106.graph_c0 | 0.1097449      | 0.0990894      | 0.089551       | 8.0683669      | 4.5684681      | 2.5993598      | 7.744E-05 | 5.733374  | up        | -                                                                                   |
| c23112.graph_c0 | 200.81928      | 215.11933      | 210.58055      | 35.654924      | 27.70723       | 24.972322      | 1.5E-77   | -2.778015 | down      | hypothetical protein MIMGU_mgv1a018508mg [Erythranthe guttata]                      |
| c23113.graph_c0 | 38.219574      | 43.394528      | 41.582481      | 97.404908      | 101.28784      | 96.021571      | 6.468E-18 | 1.300239  | up        | -                                                                                   |
| c23144.graph_c0 | 0.881961       | 1.1944921      | 1.0795094      | 7.1868246      | 10.489806      | 13.002746      | 2.11E-12  | 3.314879  | up        | PREDICTED: WAI1-related protein At2g59510-like [Sesamum indicum]                    |
| c23146.graph_c0 | 3.3341457      | 4.6063068      | 3.441768       | 10.183796      | 9.9793595      | 7.6569508      | 8.114E-06 | 1.334572  | up        | PREDICTED: uncharacterized protein LOC105156652 [Sesamum indicum]                   |
| c23151.graph_c0 | 6.8417661      | 5.4188362      | 8.5211543      | 18.94244       | 20.228401      | 27.211476      | 4.78E-10  | 1.712997  | up        | PREDICTED: copper transporter 6-like [Sesamum indicum]                              |
| c23152.graph_c0 | 41.697815      | 36.766187      | 39.103446      | 18.933153      | 12.058306      | 18.551322      | 1.218E-07 | -1.199863 | down      | -                                                                                   |
| c23190.graph_c0 | 0.8358614      | 0.686095       | 1.3021071      | 23.887267      | 31.325962      | 44.823519      | 1.06E-16  | 5.17972   | up        | hypothetical protein MIMGU_mgv1a015689mg [Erythranthe guttata]                      |
| c23196.graph_c0 | 3.5120923      | 2.8539811      | 2.3643169      | 1.6694384      | 0.3537135      | 0.0990304      | 0.000901  | -1.958705 | down      | BnaC01g07200D [Brassica napus]                                                      |
| c23198.graph_c0 | 0.2873839      | 0.0432468      | 0.1954191      | 13.964075      | 23.797828      | 29.118069      | 6.098E-20 | 7.020231  | up        | PREDICTED: peroxidase 27-like [Sesamum indicum]                                     |
| c23198.graph_c1 | 0              | 0.231023       | 0.4175692      | 6.1622513      | 10.994792      | 14.4293        | 2.578E-09 | 5.634428  | up        | hypothetical protein MIMGU_mgv1a009974mg [Erythranthe guttata]                      |
| c23201.graph_c0 | 6.212079       | 4.7735531      | 5.7161129      | 23.287728      | 57.505394      | 70.81013       | 0.0001499 | 3.208369  | up        | PREDICTED: cytochrome P450 1D11-like [Beta vulgaris subsp. vulgaris]                |
| c23217.graph_c0 | 0              | 0              | 0              | 2.69428        | 2.7400924      | 3.4521899      | 5.579E-22 | Inf       | up        | hypothetical protein MIMGU_mgv1a016855mg [Erythranthe guttata]                      |
| c23230.graph_c0 | 7.5800477      | 9.3165383      | 8.3225709      | 26.460468      | 23.555119      | 23.812932      | 2.889E-16 | 1.594219  | up        | PREDICTED: tetraspanin-8-like [Sesamum indicum]                                     |
| c23258.graph_c1 | 2.7719515      | 2.7530936      | 2.1864935      | 0.468487       | 1.240763       | 0.7294997      | 0.0003753 | -1.631761 | down      | -                                                                                   |
| c23261.graph_c0 | 12.312239      | 16.599572      | 14.694134      | 50.058129      | 41.445909      | 40.195918      | 1.819E-12 | 1.641107  | up        | PREDICTED: uncharacterized protein LOC105161807 [Sesamum indicum]                   |
| c23279.graph_c0 | 0.8132503      | 1.1014332      | 0.6636056      | 5.7341293      | 7.0984262      | 9.2871393      | 1.281E-15 | 3.137589  | up        | unnamed protein product [Coffea canephora]                                          |
| c23283.graph_c0 | 0.5742678      | 0.51851        | 1.0649951      | 43.013852      | 55.10218       | 75.369289      | 7.297E-28 | 6.362792  | up        | unnamed protein product [Coffea canephora]                                          |
| c23287.graph_c0 | 1.6138935      | 1.3697628      | 1.5539702      | 3.3549953      | 6.1115087      | 6.0433204      | 8.965E-06 | 1.804662  | up        | PREDICTED: GDSL esterase/lipase At5g33370-like isoform X1 [Sesamum indicum]         |
| c23299.graph_c0 | 1.1637528      | 1.1720012      | 1.5339899      | 11.460722      | 16.709238      | 16.003292      | 2.311E-31 | 3.547874  | up        | PREDICTED: B-box zinc finger protein 21 [Vitis vinifera]                            |
| c23342.graph_c0 | 0.8862212      | 0.8535196      | 0.915989       | 39.541942      | 20.151577      | 12.727611      | 0.0002774 | 4.82967   | up        | PREDICTED: beta-D-xylosidase 1 [Sesamum indicum]                                    |
| c23354.graph_c0 | 1.0064587      | 0.5111651      | 0.3593022      | 2.152846       | 2.7030273      | 2.4122237      | 4.833E-06 | 1.99241   | up        | PREDICTED: putative late blight resistance protein homolog R1A-10 [Sesamum indicum] |
| c23376.graph_c0 | 1.7187516      | 1.8670954      | 1.0080377      | 11.029386      | 17.274008      | 17.295452      | 1.514E-19 | 3.346152  | up        | 4-coumarate coenzyme A ligase [Paulownia fortunei]                                  |
| c23392.graph_c0 | 1.4881805      | 3.4935873      | 3.1572921      | 9.1300712      | 8.7129765      | 8.325301       | 1.606E-06 | 1.72848   | up        | PREDICTED: uncharacterized protein LOC105168788 [Sesamum indicum]                   |
| c23400.graph_c0 | 0.2801649      | 0.2168251      | 0.326589       | 1.1668546      | 1.0749052      | 1.5348194      | 5.334E-07 | 2.236869  | up        | hypothetical protein MIMGU_mgv1a026825mg [Erythranthe guttata]                      |
| c23414.graph_c0 | 53.073745      | 55.907385      | 62.034051      | 13.407931      | 16.446826      | 13.116349      | 4.699E-29 | -1.952922 | down      | PREDICTED: mannan synthase 1-like [Sesamum indicum]                                 |
| c23432.graph_c0 | 3.5446261      | 2.1541592      | 2.7811404      | 15.034519      | 14.188068      | 11.993733      | 2.088E-12 | 2.325508  | up        | PREDICTED: beta-galactosidase-like [Sesamum indicum]                                |

| #ID             | 28 h-1<br>FPKM | 28 h-2<br>FPKM | 28 h-3<br>FPKM | 48 h-1<br>FPKM | 48 h-2<br>FPKM | 48 h-3<br>FPKM | FDR       | log2FC    | regulated | nr_annotation                                                                                    |
|-----------------|----------------|----------------|----------------|----------------|----------------|----------------|-----------|-----------|-----------|--------------------------------------------------------------------------------------------------|
| c23435.graph_c0 | 0              | 0              | 0.1444898      | 4.0401462      | 6.0633972      | 5.9914964      | 3.437E-23 | 6.829127  | up        | hypothetical protein MIMGU_mgv1a016138mg [Erythranthe guttata]                                   |
| c23458.graph_c0 | 5.1955233      | 6.4153558      | 4.0561747      | 11.533889      | 10.785693      | 11.561471      | 3.545E-07 | 1.156352  | up        | PREDICTED: uncharacterized protein LOC105155955 [Sesamum indicum]                                |
| c23482.graph_c0 | 4.5570199      | 5.0024408      | 4.4230472      | 12.221558      | 10.467311      | 12.010828      | 1.908E-10 | 1.355488  | up        | PREDICTED: serine/threonine-protein kinase AtPK2/AtPK19-like [Sesamum indicum]                   |
| c23494.graph_c0 | 0.4173862      | 0.3768606      | 0.3405837      | 1.3430181      | 1.3796508      | 1.158797       | 4.067E-05 | 1.81736   | up        | PREDICTED: O-acyltransferase WSD1-like isoform X1 [Sesamum indicum]                              |
| c23519.graph_c0 | 0              | 0.0527979      | 0.0477155      | 3.6319773      | 2.1986512      | 1.780739       | 3.275E-08 | 6.297437  | up        | -                                                                                                |
| c23541.graph_c0 | 10.005652      | 8.8587448      | 7.3718573      | 19.332188      | 26.350204      | 34.732024      | 1.028E-05 | 1.650446  | up        | PREDICTED: non-specific lipid transfer protein GPI-anchored 2-like [Nicotiana tomentosiformis]   |
| c23542.graph_c0 | 6.8037947      | 8.201987       | 7.7425673      | 1.8647159      | 4.1978107      | 4.6457963      | 0.0008225 | -1.058878 | down      | PREDICTED: F-box/kelch-repeat protein At1g57790-like [Nicotiana tomentosiformis]                 |
| c23565.graph_c0 | 4.682088       | 2.9408601      | 4.4849882      | 1.032155       | 0.9567627      | 0.4592027      | 1.129E-06 | -2.257594 | down      | PREDICTED: protein CUP-SHAPED COILEDON 5 [Sesamum indicum]                                       |
| c23586.graph_c0 | 4.980539       | 4.2775958      | 4.1962443      | 9.7520975      | 9.2980483      | 8.0836437      | 0.0003564 | 1.056358  | up        | PREDICTED: glucan endo-1,5-beta-glucosidase 14-like [Sesamum indicum]                            |
| c23589.graph_c0 | 2.490801       | 2.5517044      | 3.205054       | 6.5574147      | 7.9116171      | 7.8877151      | 1.738E-05 | 1.476832  | up        | PREDICTED: calcium-dependent protein kinase 8-like [Sesamum indicum]                             |
| c23594.graph_c0 | 1.2972183      | 1.6644313      | 1.1142311      | 3.9809846      | 3.7589606      | 4.0812951      | 0.000214  | 1.579411  | up        | PREDICTED: uncharacterized protein LOC105160721 [Sesamum indicum]                                |
| c23637.graph_c0 | 0              | 0.1411526      | 0.2126086      | 5.4824713      | 6.9976067      | 6.9941461      | 2.448E-28 | 5.818978  | up        | PREDICTED: uncharacterized acetyltransferase At3g50280-like [Sesamum indicum]                    |
| c23640.graph_c0 | 0.382902       | 0.3951139      | 0.3124449      | 6.6563183      | 4.3337726      | 3.3932434      | 9.079E-07 | 3.775144  | up        | -                                                                                                |
| c23652.graph_c0 | 19.725808      | 21.51145       | 20.172383      | 10.310056      | 9.202214       | 9.4627651      | 5.205E-05 | -1.039378 | down      | PREDICTED: uncharacterized protein LOC105169025 [Sesamum indicum]                                |
| c23673.graph_c0 | 4.3952692      | 7.3357417      | 5.8688243      | 1.0129686      | 1.2519703      | 1.3520001      | 1.435E-06 | -2.244853 | down      | PREDICTED: EPIDERMAL PATTERNING FACTOR-like protein 4-like [Fragaria vesca subsp. vesca]         |
| c23690.graph_c0 | 20.353493      | 19.908737      | 21.353508      | 48.834865      | 51.327899      | 58.210581      | 7.528E-17 | 1.401921  | up        | PREDICTED: uncharacterized protein LOC105170479 [Sesamum indicum]                                |
| c23716.graph_c0 | 20.905995      | 14.400364      | 15.652183      | 52.726582      | 62.514004      | 38.40775       | 3.366E-06 | 1.634588  | up        | hypothetical protein [Arachis diogeni]                                                           |
| c23716.graph_c1 | 42.678444      | 41.449018      | 34.825262      | 183.66068      | 158.92785      | 117.30656      | 1.118E-07 | 1.998874  | up        | PREDICTED: abscisic acid receptor PYL4-like [Sesamum indicum]                                    |
| c23817.graph_c0 | 10.587921      | 11.736137      | 8.0074871      | 1.0911358      | 2.1962594      | 2.3301265      | 4.338E-09 | -2.402385 | down      | hypothetical protein MIMGU_mgv1a012373mg [Erythranthe guttata]                                   |
| c23864.graph_c0 | 1.9777018      | 0.9236272      | 1.9476758      | 45.815441      | 34.707751      | 38.151107      | 3.619E-37 | 4.659097  | up        | PREDICTED: histone H2AX-like [Sesamum indicum]                                                   |
| c23868.graph_c0 | 0.2580585      | 0.0776675      | 0              | 2.1807206      | 5.5445018      | 5.142039       | 2.915E-08 | 5.289052  | up        | PREDICTED: uncharacterized protein LOC105162653 [Sesamum indicum]                                |
| c23907.graph_c0 | 1.72706        | 1.1340896      | 2.0498427      | 3.6486263      | 3.6544438      | 3.6006922      | 0.0047017 | 1.192059  | up        | hypothetical protein MIMGU_mgv1a015138mg [Erythranthe guttata]                                   |
| c23921.graph_c0 | 14.640517      | 18.268975      | 16.778852      | 84.449026      | 87.696323      | 88.686392      | 3.377E-27 | 2.433573  | up        | PREDICTED: pectinesterase-like isoform X2 [Sesamum indicum]                                      |
| c23936.graph_c0 | 43.021767      | 43.591419      | 45.615584      | 91.073873      | 98.128974      | 100.90093      | 6.95E-14  | 1.173903  | up        | actin [Ipomoea nil]                                                                              |
| c23950.graph_c0 | 5.1684394      | 6.3733878      | 5.2912804      | 0.8189222      | 1.3816517      | 2.1860161      | 1.878E-09 | -1.910094 | down      | PREDICTED: LOW QUALITY PROTEIN: H/ACA ribonucleoprotein complex subunit 4-like [Sesamum indicum] |
| c23951.graph_c0 | 5.0910667      | 5.581775       | 5.3741732      | 0.3585168      | 0.5425786      | 1.3671689      | 1.18E-11  | -2.79475  | down      | PREDICTED: uncharacterized protein LOC105166244 [Sesamum indicum]                                |



| #ID             | 28 h-1<br>FPKM | 28 h-2<br>FPKM | 28 h-3<br>FPKM | 48 h-1<br>FPKM | 48 h-2<br>FPKM | 48 h-3<br>FPKM | FDR       | log2FC    | regulated | nr_annotation                                                                              |
|-----------------|----------------|----------------|----------------|----------------|----------------|----------------|-----------|-----------|-----------|--------------------------------------------------------------------------------------------|
| c23967.graph_c0 | 0.3000017      | 0.6771834      | 0.6527971      | 9.8237504      | 8.2585155      | 12.23756       | 1.101E-26 | 4.259126  | up        | PREDICTED: high mobility group B protein 7-like [Sesamum indicum]                          |
| c23979.graph_c0 | 5.49326        | 4.0903061      | 4.7153101      | 22.92401       | 24.668408      | 28.846376      | 2.035E-36 | 2.457584  | up        | PREDICTED: ferredoxin--NADP reductase, leaf isozyme, chloroplastic isoform 1 [Glycine max] |
| c23987.graph_c0 | 6.1414857      | 7.2796988      | 7.0539642      | 10.662573      | 14.344371      | 15.298173      | 1.605E-06 | 1.013225  | up        | PREDICTED: lysophospholipid acyltransferase 1-like [Sesamum indicum]                       |
| c23996.graph_c0 | 0.6763082      | 1.1067903      | 0.7933016      | 0.2946867      | 0.4540871      | 0.3337224      | 0.0067093 | -1.214148 | down      | Quinohemoprotein ethanol dehydrogenase type-1 [Theobroma cacao]                            |
| c24030.graph_c0 | 0.197622       | 0.1784341      | 0.2822014      | 5.3857596      | 10.216932      | 11.033243      | 2.674E-14 | 5.36832   | up        | PREDICTED: uncharacterized protein LOC105166144 [Sesamum indicum]                          |
| c24031.graph_c0 | 2.7173132      | 4.3865231      | 3.0235982      | 0.6262536      | 0.5528664      | 0.835855       | 1.268E-06 | -2.288139 | down      | hypothetical protein MIMGU_mgv1a02511/mg, partial [Erythranthe guttata]                    |
| c24038.graph_c1 | 5.7633054      | 4.9707218      | 4.6326189      | 13.520468      | 22.524538      | 15.426117      | 1.701E-06 | 1.779421  | up        | PREDICTED: luminal-binding protein 5 [Sesamum indicum]                                     |
| c24097.graph_c0 | 0.8804379      | 1.0599371      | 1.2315945      | 3.2949157      | 2.4490245      | 3.9484675      | 1.597E-06 | 1.654482  | up        | PREDICTED: protein S-acyltransferase 18 isoform X4 [Sesamum indicum]                       |
| c24101.graph_c0 | 17.479117      | 22.080651      | 24.560186      | 68.256586      | 66.415346      | 75.85157       | 1.972E-24 | 1.756408  | up        | PREDICTED: methionine gamma-lyase [Sesamum indicum]                                        |
| c24101.graph_c1 | 6.85532        | 6.1897112      | 9.3522767      | 28.784376      | 26.609943      | 35.156321      | 6.319E-13 | 2.0558    | up        | PREDICTED: methionine gamma-lyase [Sesamum indicum]                                        |
| c24115.graph_c0 | 0.0592032      | 0              | 0.0483093      | 1.3507994      | 4.014773       | 3.1383811      | 2.17E-08  | 6.32959   | up        | PREDICTED: geraniol 8-hydroxylase-like isoform X1 [Beta vulgaris subsp. vulgaris]          |
| c24123.graph_c0 | 2.9047158      | 3.292308       | 3.0258184      | 1.2534268      | 1.161872       | 1.2547031      | 0.0038275 | -1.286332 | down      | PREDICTED: fasciclin-like arabinogalactan protein 1 [Sesamum indicum]                      |
| c24123.graph_c1 | 2.1918647      | 2.4879465      | 1.9929487      | 0.3175257      | 0.5888665      | 0.9888636      | 0.0001525 | -1.78756  | down      | PREDICTED: fasciclin-like arabinogalactan protein 1 [Sesamum indicum]                      |
| c24158.graph_c0 | 1.2750037      | 1.0814385      | 1.6078794      | 0.3917966      | 0.3112958      | 0.4793501      | 0.0002072 | -1.703477 | down      | -                                                                                          |
| c24169.graph_c0 | 1.166563       | 1.3166213      | 1.0708941      | 7.3935226      | 6.0702191      | 7.7299866      | 6.968E-09 | 2.620246  | up        | PREDICTED: 2-hydroxyisotriavanone dehydratase-like [Sesamum indicum]                       |
| c24236.graph_c0 | 2.5868675      | 3.0184415      | 3.3773804      | 24.466721      | 20.094311      | 17.191836      | 4.839E-15 | 2.82861   | up        | PREDICTED: uncharacterized protein LOC102578886 [Solanum tuberosum]                        |
| c24237.graph_c1 | 1.9765966      | 1.626043       | 1.6128867      | 5.4563824      | 4.5417237      | 5.8954255      | 7.466E-06 | 1.65094   | up        | hypothetical protein MIMGU_mgv1a021532mg [Erythranthe guttata]                             |
| c24238.graph_c0 | 91.559685      | 81.60585       | 95.192839      | 10.754469      | 11.551293      | 13.290641      | 9.327E-45 | -2.875059 | down      | -                                                                                          |
| c24238.graph_c1 | 2.439995       | 2.2030867      | 2.21224        | 13.574278      | 15.108418      | 13.760101      | 7.33E-11  | 2.671051  | up        | PREDICTED: metallothionein-like protein 1 [Sesamum indicum]                                |
| c24247.graph_c0 | 6.8373566      | 5.5086543      | 6.0942327      | 27.867266      | 74.511241      | 94.9134        | 0.0002536 | 3.444611  | up        | PREDICTED: cytochrome P450 71D11-like [Sesamum indicum]                                    |
| c24250.graph_c0 | 1.7414153      | 2.1128248      | 2.3534992      | 6.208234       | 8.6960852      | 11.416369      | 6.001E-07 | 2.117669  | up        | hypothetical protein MIMGU_mgv1a016982mg [Erythranthe guttata]                             |
| c24292.graph_c0 | 29.193156      | 33.605859      | 25.986956      | 65.721917      | 57.368421      | 53.295438      | 7.013E-08 | 1.0363    | up        | hypothetical protein MIMGU_mgv1a016421mg [Erythranthe guttata]                             |
| c24294.graph_c0 | 29.36742       | 27.088315      | 28.216104      | 10.980144      | 10.59186       | 8.3403006      | 9.028E-10 | -1.456342 | down      | ZPT2-14 [Petunia x hybrida]                                                                |
| c24304.graph_c0 | 3.4439821      | 3.3583604      | 3.8219554      | 0              | 0.5549663      | 0.3107517      | 2.8E-11   | -3.60644  | down      | -                                                                                          |
| c24314.graph_c0 | 2.9409414      | 3.1295719      | 3.1282901      | 8.3211156      | 6.2764317      | 4.9755409      | 0.0043217 | 1.139383  | up        | hypothetical protein MIMGU_mgv1a013918mg [Erythranthe guttata]                             |
| c24321.graph_c0 | 12.132535      | 12.127598      | 10.209936      | 4.2817646      | 4.4018089      | 5.5908421      | 1.118E-09 | -1.232143 | down      | PREDICTED: uncharacterized protein LOC105168724 isoform X1 [Sesamum indicum]               |
| c24323.graph_c0 | 182.04986      | 160.68221      | 185.64771      | 43.155551      | 88.826791      | 113.14398      | 9.292E-05 | -1.079821 | down      | PREDICTED: alpha-xylosidase 1 [Sesamum indicum]                                            |
| c24348.graph_c0 | 3.6994049      | 3.0618645      | 3.4211754      | 8.2843738      | 13.826796      | 19.054337      | 0.0003331 | 2.046016  | up        | hypothetical protein MIMGU_mgv1a011727mg [Erythranthe guttata]                             |

| #ID             | 28 h-1<br>FPKM | 28 h-2<br>FPKM | 28 h-3<br>FPKM | 48 h-1<br>FPKM | 48 h-2<br>FPKM | 48 h-3<br>FPKM | FDR       | log2FC    | regulated | nr_annotation                                                                                                 |
|-----------------|----------------|----------------|----------------|----------------|----------------|----------------|-----------|-----------|-----------|---------------------------------------------------------------------------------------------------------------|
| c24355.graph_c0 | 42.91908       | 41.994742      | 39.674072      | 92.530786      | 75.357586      | 81.928253      | 1.136E-09 | 1.049337  | up        | PREDICTED: uncharacterized endoplasmic reticulum membrane protein C16E8.02 [Sesamum indicum]                  |
| c24366.graph_c0 | 8.4439793      | 7.9921827      | 8.2207431      | 46.578095      | 74.367663      | 68.636973      | 2.82E-18  | 2.976935  | up        | PREDICTED: chaperone protein dnaJ 20, chloroplastic-like [Sesamum indicum]                                    |
| c24370.graph_c0 | 0              | 0              | 0              | 2.0974255      | 2.4518267      | 2.1880484      | 1.939E-22 | Inf       | up        | hypothetical protein SELMODRAFT_117229, partial [Selaginella moellendorffii]                                  |
| c24417.graph_c0 | 2.2234231      | 1.822231       | 1.7305584      | 0.2601556      | 0.2756033      | 0.2700657      | 4.76E-09  | -2.800295 | down      | PREDICTED: transcription factor TGA3 [Sesamum indicum]                                                        |
| c24418.graph_c0 | 0              | 0              | 0.026675       | 2.0304331      | 2.7655685      | 3.1708853      | 9.57E-28  | 8.252555  | up        | PREDICTED: patatin-like protein 1 [Sesamum indicum]                                                           |
| c24438.graph_c0 | 1.2171887      | 1.2480252      | 1.2962311      | 7.6097796      | 9.7238323      | 10.377755      | 7.564E-31 | 2.918047  | up        | PREDICTED: ornithine decarboxylase-like [Sesamum indicum]                                                     |
| c24442.graph_c0 | 0.6609523      | 0.4475834      | 0.4044987      | 3.979577       | 9.7630888      | 8.7593248      | 8.232E-07 | 3.922724  | up        | -                                                                                                             |
| c24454.graph_c0 | 1.3919115      | 1.6392595      | 0.9876421      | 3.375279       | 3.4131671      | 4.777982       | 0.0001552 | 1.564804  | up        | hypothetical protein TRIUR3_08605 [Triticum urartu]                                                           |
| c24465.graph_c0 | 86.453862      | 118.46891      | 118.24272      | 6.9369406      | 8.3858013      | 8.1415725      | 1.75E-33  | -3.74502  | down      | legumin-like protein [Perilla frutescens]                                                                     |
| c24475.graph_c0 | 0.4582489      | 0.5378825      | 0.2617491      | 3.020494       | 3.8767378      | 3.7730013      | 2.078E-12 | 3.123265  | up        | PREDICTED: uncharacterized protein LOC105167521 [Sesamum indicum]                                             |
| c24482.graph_c0 | 37.133275      | 40.199658      | 40.268305      | 96.888964      | 118.94527      | 136.53274      | 6.101E-17 | 1.620291  | up        | PREDICTED: probable methylenetetrahydrofolate reductase [Sesamum indicum]                                     |
| c24492.graph_c0 | 79.205229      | 73.832138      | 72.50206       | 214.81905      | 202.14341      | 199.62893      | 4.982E-25 | 1.494441  | up        | hypothetical protein MIMGU_mgv1a017195mg [Erythranthe guttata]                                                |
| c24500.graph_c0 | 5.5089383      | 4.3771682      | 5.8438233      | 21.088615      | 29.590504      | 33.179653      | 4.137E-15 | 2.448998  | up        | -                                                                                                             |
| c24502.graph_c0 | 9.2738665      | 7.4072667      | 9.8958299      | 0.4521273      | 0.718461       | 0.4023001      | 1.691E-13 | -4.041844 | down      | -                                                                                                             |
| c24523.graph_c0 | 43.997563      | 47.814421      | 43.841624      | 62.708065      | 91.810658      | 112.09577      | 0.0013256 | 1.008642  | up        | PREDICTED: anthocyanidin 3-O-glucoside 6'-O-acetyltransferase-like [Sesamum indicum]                          |
| c24534.graph_c0 | 70.815181      | 61.451552      | 63.030942      | 250.89527      | 213.25118      | 205.42693      | 3.408E-18 | 1.823317  | up        | conserved hypothetical protein [Ricinus communis]                                                             |
| c24542.graph_c0 | 2.3811742      | 1.7916476      | 2.2128824      | 0.5030523      | 0.2664615      | 1.2682366      | 0.0007487 | -1.6119   | down      | -                                                                                                             |
| c24548.graph_c0 | 2.2570568      | 1.817596       | 1.8915166      | 15.464788      | 9.0106869      | 7.9122731      | 0.0004631 | 2.495316  | up        | PREDICTED: S-norcochlorogenic acid synthase-like [Sesamum indicum]                                            |
| c24558.graph_c0 | 1.3976242      | 1.3145037      | 1.9007498      | 7.8983457      | 5.0047639      | 6.3054061      | 4.427E-07 | 2.106659  | up        | PREDICTED: uncharacterized protein LOC105160970 [Sesamum indicum]                                             |
| c24559.graph_c0 | 65.271953      | 71.14201       | 71.077293      | 10.595432      | 10.672547      | 10.818731      | 9.011E-61 | -2.65113  | down      | PREDICTED: uncharacterized protein LOC105168445 [Sesamum indicum]                                             |
| c24566.graph_c0 | 5.4967586      | 6.954811       | 6.2853359      | 25.807425      | 24.134812      | 29.733996      | 3.469E-29 | 2.129988  | up        | PREDICTED: 2-C-methyl-D-erythritol 4-phosphate cytidyltransferase, chloroplastic isoform X2 [Sesamum indicum] |
| c24575.graph_c0 | 8.6169592      | 9.3950868      | 9.0545451      | 20.14504       | 22.814918      | 25.901761      | 2.29E-12  | 1.38592   | up        | PREDICTED: magnesium protoporphyrin IX methyltransferase, chloroplastic [Sesamum indicum]                     |
| c24582.graph_c0 | 4.3800076      | 3.4547121      | 3.4097263      | 10.912517      | 12.371751      | 22.429282      | 0.0006755 | 2.057988  | up        | PREDICTED: protein TIFY 10B-like [Sesamum indicum]                                                            |
| c24644.graph_c0 | 0.8454992      | 0.1090581      | 0.5913604      | 2.0669126      | 1.9463496      | 2.0434738      | 5.165E-06 | 2.01155   | up        | hypothetical protein MIMGU_mgv1a016118mg [Erythranthe guttata]                                                |
| c24673.graph_c0 | 9.5850845      | 9.8304704      | 9.7562492      | 4.0640448      | 3.4084121      | 3.4654892      | 5.332E-07 | -1.369666 | down      | PREDICTED: UDP-glycosyltransferase 89A2-like [Sesamum indicum]                                                |

| #ID             | 28 h-1<br>FPKM | 28 h-2<br>FPKM | 28 h-3<br>FPKM | 48 h-1<br>FPKM | 48 h-2<br>FPKM | 48 h-3<br>FPKM | FDR       | log2FC    | regulated | nr_annotation                                                                          |
|-----------------|----------------|----------------|----------------|----------------|----------------|----------------|-----------|-----------|-----------|----------------------------------------------------------------------------------------|
| c24676.graph_c0 | 3.7585635      | 3.8784348      | 3.3648901      | 9.0656986      | 9.6616902      | 11.094609      | 1.115E-11 | 1.478573  | up        | PREDICTED: LOW QUALITY PROTEIN: uncharacterized protein LOC105175967 [Sesamum indicum] |
| c24693.graph_c1 | 3.8623676      | 4.6498078      | 5.0557886      | 1.1219623      | 1.728848       | 1.1798272      | 9.083E-05 | -1.714567 | down      | PREDICTED: mitoferrin-like [Sesamum indicum]                                           |
| c24749.graph_c0 | 1.1705425      | 1.7072841      | 2.1307263      | 35.039301      | 42.07727       | 33.513552      | 1.676E-49 | 4.505104  | up        | predicted protein [Hordeum vulgare subsp. vulgare]                                     |
| c24765.graph_c0 | 1.3099669      | 0.6989139      | 1.1660971      | 7.3966818      | 10.714377      | 8.4619581      | 1.075E-15 | 3.101381  | up        | hypothetical protein CICLE_v10022284mg [Citrus clementina]                             |
| c24783.graph_c0 | 0.3221724      | 0.0581783      | 0.315468       | 3.8387459      | 4.0666858      | 4.2151106      | 2.068E-16 | 4.161539  | up        | -                                                                                      |
| c24796.graph_c0 | 3.6497711      | 4.0558783      | 2.5200014      | 6.7615939      | 7.7662963      | 8.2963342      | 0.0005718 | 1.198062  | up        | hypothetical protein L484_021121 [Morus notabilis]                                     |
| c24797.graph_c0 | 1.2433059      | 1.8134124      | 3.0435824      | 64.31218       | 62.223277      | 50.806376      | 4.12E-60  | 4.904938  | up        | PREDICTED: probable pectinesterase/pectinesterase inhibitor 17 [Sesamum indicum]       |
| c24866.graph_c0 | 3.5257166      | 4.334831       | 3.917557       | 9.9841718      | 8.8645496      | 7.9108623      | 2.802E-05 | 1.229648  | up        | PREDICTED: acidic mammalian chitinase-like [Sesamum indicum]                           |
| c24896.graph_c0 | 144.6271       | 165.41431      | 149.30122      | 284.07327      | 313.14785      | 357.39606      | 1.869E-14 | 1.094648  | up        | PREDICTED: thiamine thiazole synthase 2, chloroplastic-like [Sesamum indicum]          |
| c24896.graph_c1 | 136.11355      | 166.137        | 141.38156      | 278.69866      | 288.41652      | 338.91393      | 4.683E-13 | 1.070517  | up        | PREDICTED: thiamine thiazole synthase 2, chloroplastic [Vitis vinifera]                |
| c24911.graph_c0 | 2.7536113      | 4.8689117      | 3.1831428      | 1.0907516      | 0.9244152      | 1.6175737      | 0.0014743 | -1.532014 | down      | PREDICTED: auxin-induced protein 10A5-like [Sesamum indicum]                           |
| c24918.graph_c0 | 12.324468      | 13.470542      | 11.776884      | 2.6722133      | 4.1374488      | 7.4989611      | 0.0001727 | -1.362617 | down      | -                                                                                      |
| c24937.graph_c0 | 0.5224823      | 0.497961       | 0.7105688      | 5.0039296      | 4.4435327      | 5.7947541      | 8.011E-18 | 3.17978   | up        | PREDICTED: putative cyclin-A3-1 [Sesamum indicum]                                      |
| c24946.graph_c0 | 13.128572      | 15.384809      | 13.020619      | 2.3457337      | 6.1891074      | 6.5767112      | 4.197E-08 | -1.432057 | down      | hypothetical protein MIMGU_mgv1a010693mg [Erythranthe guttata]                         |
| c24966.graph_c0 | 2.5379537      | 3.6282626      | 3.5378721      | 6.5681301      | 6.2481234      | 7.3948066      | 0.0098487 | 1.100097  | up        | hypothetical protein MIMGU_mgv1a019945mg [Erythranthe guttata]                         |
| c24971.graph_c0 | 0.9713719      | 1.5149179      | 1.3330621      | 3.3020836      | 2.4309228      | 2.3405794      | 0.009975  | 1.128889  | up        | PREDICTED: zinc transporter 8-like [Sesamum indicum]                                   |
| c24986.graph_c0 | 3.9758245      | 5.2650353      | 4.5419365      | 20.382586      | 21.948805      | 10.164301      | 0.0009838 | 1.975751  | up        | -                                                                                      |
| c25059.graph_c0 | 6.8837073      | 6.5135833      | 6.2531447      | 21.035242      | 16.092237      | 13.769536      | 5.935E-05 | 1.422162  | up        | PREDICTED: lysine-specific demethylase JM1706 [Sesamum indicum]                        |
| c25082.graph_c0 | 11.24852       | 12.829084      | 12.446658      | 22.822152      | 28.71347       | 26.316633      | 1.442E-10 | 1.130369  | up        | PREDICTED: delta(7)-steroid-C(6)-desaturase-like [Solanum tuberosum]                   |
| c25102.graph_c0 | 1.910021       | 1.9640935      | 2.2512556      | 19.906759      | 19.378895      | 24.594621      | 4.058E-35 | 3.422771  | up        | PREDICTED: ubiquitin-conjugating enzyme E2 20-like [Sesamum indicum]                   |
| c25122.graph_c0 | 184.72747      | 180.7942       | 194.76397      | 368.89501      | 516.40205      | 550.71168      | 8.303E-10 | 1.39312   | up        | PREDICTED: PEAKL11-like lipid transfer protein 1 [Sesamum indicum]                     |
| c25141.graph_c0 | 7.2657929      | 5.9111305      | 6.5772932      | 3.3577861      | 1.2196002      | 1.1524132      | 3.328E-07 | -1.721352 | down      | hypothetical protein MIMGU_mgv1a024254mg, partial [Erythranthe guttata]                |
| c25142.graph_c0 | 6.2330393      | 6.2998322      | 4.8583729      | 39.975874      | 44.660704      | 33.261896      | 1.067E-29 | 2.80383   | up        | uncharacterized protein LOC100499662 [Glycine max]                                     |
| c25198.graph_c0 | 88.232142      | 83.853767      | 91.695378      | 680.5245       | 370.57313      | 263.95023      | 0.0098601 | 2.375684  | up        | hypothetical protein MIMGU_mgv1a026311mg [Erythranthe guttata]                         |
| c25203.graph_c0 | 80.545827      | 72.92162       | 70.824835      | 129.7923       | 173.55261      | 176.2363       | 7.576E-12 | 1.133032  | up        | hypothetical protein MIMGU_mgv1a012619mg [Erythranthe guttata]                         |
| c25208.graph_c0 | 0.0719884      | 0.2599951      | 0.0587419      | 4.3800289      | 7.1535022      | 5.5212082      | 1.926E-22 | 5.485321  | up        | unnamed protein product [Coffea canephora]                                             |
| c25218.graph_c0 | 26.438344      | 28.213846      | 25.408258      | 12.750096      | 10.960745      | 7.4393173      | 4.629E-16 | -1.313213 | down      | PREDICTED: limonoid UDP-glucosyltransferase-like [Sesamum indicum]                     |
| c25222.graph_c0 | 2.0019618      | 1.6067411      | 1.4002152      | 14.661885      | 16.55661       | 21.432809      | 2.229E-27 | 3.431742  | up        | PREDICTED: fructose-1,6-bisphosphatase, chloroplastic [Sesamum indicum]                |

| #ID             | 28 h-1<br>FPKM | 28 h-2<br>FPKM | 28 h-3<br>FPKM | 48 h-1<br>FPKM | 48 h-2<br>FPKM | 48 h-3<br>FPKM | FDR       | log2FC    | regulated | nr_annotation                                                                                     |
|-----------------|----------------|----------------|----------------|----------------|----------------|----------------|-----------|-----------|-----------|---------------------------------------------------------------------------------------------------|
| c25224.graph_c0 | 23.045302      | 25.07432       | 24.291977      | 91.781613      | 86.688316      | 89.784203      | 4.018E-40 | 1.932321  | up        | PREDICTED: alpha carbonic anhydrase 1, chloroplastic [Sesamum indicum]                            |
| c25228.graph_c0 | 13.294721      | 11.146466      | 12.742546      | 4.5473755      | 4.6757049      | 4.1652341      | 0.000161  | -1.431336 | down      | PREDICTED: serine/threonine-protein kinase HT1-like [Fragaria vesca subsp. vesca]                 |
| c25231.graph_c0 | 0.2984476      | 0.5389403      | 0.4383554      | 12.748854      | 10.019187      | 7.2035151      | 4.12E-13  | 4.604477  | up        | PREDICTED: ectonucleotide pyrophosphatase/phosphodiesterase family member 3 [Eucalyptus grandis]  |
| c25236.graph_c0 | 2.3224433      | 1.4336281      | 2.8233044      | 7.3897093      | 12.283745      | 10.611389      | 2.895E-10 | 2.2355    | up        | PREDICTED: uncharacterized protein LOC105167295 [Sesamum indicum]                                 |
| c25241.graph_c0 | 0.4034257      | 0.5142432      | 0.4066491      | 1.082905       | 1.7845436      | 1.980656       | 5.302E-06 | 1.90504   | up        | PREDICTED: organic cation/carnitine transporter 7-like isoform X2 [Sesamum indicum]               |
| c25258.graph_c0 | 2.2717617      | 2.2250173      | 1.9794162      | 3.6117334      | 7.1870394      | 9.5542393      | 0.0061069 | 1.680871  | up        | PREDICTED: uncharacterized protein At4g06744-like [Nicotiana tomentosiformis]                     |
| c25264.graph_c0 | 1.0859052      | 1.2384892      | 1.0259987      | 0.2173366      | 0.306989       | 0.8057698      | 0.0065889 | -1.304128 | down      | PREDICTED: F-box protein At3g07870-like [Sesamum indicum]                                         |
| c25291.graph_c0 | 1.8191169      | 1.4108586      | 1.2560177      | 29.444119      | 41.871824      | 44.296639      | 8.204E-42 | 4.723148  | up        | PREDICTED: purple acid phosphatase 22-like [Sesamum indicum]                                      |
| c25305.graph_c1 | 0.6871875      | 0.3722795      | 1.0093309      | 1.6550155      | 2.9529065      | 2.7127263      | 3.024E-05 | 1.854091  | up        | hypothetical protein MIMGU_mgv1a002668mg [Erythranthe guttata]                                    |
| c25327.graph_c0 | 8.6538194      | 9.2910105      | 9.0023112      | 19.073418      | 22.086126      | 21.727974      | 2.017E-16 | 1.262134  | up        | PREDICTED: LOW QUALITY PROTEIN: microtubule-associated protein TORTIFOLIA1 [Sesamum indicum]      |
| c25329.graph_c0 | 8.4307892      | 7.5532028      | 7.7327209      | 15.118705      | 14.129567      | 17.691002      | 6.131E-07 | 1.026291  | up        | PREDICTED: probable plastid-lipid-associated protein 13, chloroplastic [Sesamum indicum]          |
| c25330.graph_c0 | 5.8613011      | 6.2738241      | 5.7856135      | 15.068969      | 14.122996      | 15.087645      | 1.682E-12 | 1.347989  | up        | PREDICTED: probable aspartyl aminopeptidase [Sesamum indicum]                                     |
| c25352.graph_c0 | 4.7763305      | 5.0182733      | 4.676936       | 12.072008      | 18.736218      | 20.405776      | 2.66E-08  | 1.856991  | up        | PREDICTED: transcription factor bHLH62 isoform X2 [Sesamum indicum]                               |
| c25353.graph_c0 | 515.55858      | 510.27845      | 575.03798      | 67.604325      | 69.568895      | 61.639204      | 4.921E-69 | -2.966999 | down      | hypothetical protein MIMGU_mgv1a005193mg [Erythranthe guttata]                                    |
| c25364.graph_c1 | 4.8987215      | 2.0272479      | 4.8300911      | 7.5031341      | 11.511854      | 9.4388272      | 0.0027492 | 1.309738  | up        | leucine-rich repeat protein [Dasypyrum villosum]                                                  |
| c25389.graph_c0 | 60.23967       | 63.623415      | 68.926954      | 12.338071      | 10.950179      | 13.518542      | 5.347E-56 | -2.346566 | down      | PREDICTED: vacuolar cation/proton exchanger 5-like [Sesamum indicum]                              |
| c25406.graph_c0 | 4.7324223      | 4.5867649      | 5.192458       | 2.1012374      | 2.5132328      | 1.9902922      | 0.0006553 | -1.095351 | down      | PREDICTED: uncharacterized protein LOC105160550 [Sesamum indicum]                                 |
| c25414.graph_c0 | 7.3223983      | 8.7601569      | 7.5434593      | 2.3204198      | 2.9498441      | 2.6841043      | 0.0002033 | -1.532003 | down      | PREDICTED: protein SOMBRERO-like [Sesamum indicum]                                                |
| c25434.graph_c0 | 0              | 0.0445428      | 0.0402551      | 9.536261       | 12.421122      | 17.360105      | 2.927E-30 | 8.891506  | up        | hypothetical protein MIMGU_mgv1a005366mg [Erythranthe guttata]                                    |
| c25449.graph_c0 | 2.1741395      | 2.6425594      | 2.4223017      | 5.4057685      | 5.8390455      | 7.2150304      | 1.724E-07 | 1.389476  | up        | PREDICTED: F-box/LRR-repeat protein 17-like [Sesamum indicum]                                     |
| c25464.graph_c0 | 5.550536       | 5.0995366      | 5.7806793      | 67.394726      | 60.020168      | 56.068441      | 1.341E-53 | 3.526055  | up        | PREDICTED: alanine--glyoxylate aminotransferase 2 homolog 3, mitochondrial-like [Sesamum indicum] |
| c25466.graph_c0 | 3.551938       | 2.5863444      | 3.4593238      | 4.5749615      | 6.6929472      | 8.076931       | 0.0041601 | 1.044541  | up        | PREDICTED: uncharacterized protein LOC105177151 [Sesamum indicum]                                 |
| c25486.graph_c0 | 0.1384011      | 0.0999705      | 0.135521       | 1.087688       | 2.5647378      | 3.6527333      | 4.703E-05 | 4.313972  | up        | PREDICTED: 1-aminocyclopropane-1-carboxylate synthase 7 [Sesamum indicum]                         |
| c25506.graph_c0 | 4.2419686      | 4.6885705      | 4.1775658      | 2.1322616      | 2.4552963      | 1.5260679      | 0.0038236 | -1.057223 | down      | PREDICTED: serine acetyltransferase 1, chloroplastic-like [Sesamum indicum]                       |

| #ID             | 28 h-1<br>FPKM | 28 h-2<br>FPKM | 28 h-3<br>FPKM | 48 h-1<br>FPKM | 48 h-2<br>FPKM | 48 h-3<br>FPKM | FDR       | log2FC    | regulated | nr_annotation                                                                       |
|-----------------|----------------|----------------|----------------|----------------|----------------|----------------|-----------|-----------|-----------|-------------------------------------------------------------------------------------|
| c25519.graph_c0 | 3.378501       | 4.495429       | 4.207792       | 1.4650654      | 0.8357242      | 1.3036064      | 0.0001706 | -1.695794 | down      | PREDICTED: ethylene-responsive transcription factor CRF4-like [Sesamum indicum]     |
| c25527.graph_c0 | 0.1489112      | 0.0896352      | 0.2025171      | 10.633247      | 13.064311      | 13.044414      | 3.536E-47 | 6.417253  | up        | Early nodulin 20 precursor, putative [Ricinus communis]                             |
| c25537.graph_c0 | 18.840337      | 18.763713      | 19.193658      | 35.942887      | 36.492712      | 42.499257      | 2.331E-11 | 1.057376  | up        | hypothetical protein MIMGU_mgv1a020674mg [Erythranthe guttata]                      |
| c25559.graph_c0 | 37.065684      | 38.856759      | 38.140909      | 11.918968      | 10.950127      | 9.9453373      | 2.883E-25 | -1.752722 | down      | PREDICTED: dipeptidyl peptidase 9 [Sesamum indicum]                                 |
| c25564.graph_c0 | 41.379252      | 40.80344       | 37.889977      | 219.32886      | 248.15407      | 310.61945      | 5.438E-27 | 2.734038  | up        | PREDICTED: low-temperature-induced cysteine proteinase [Sesamum indicum]            |
| c25565.graph_c0 | 0.9293894      | 1.6503312      | 1.2133986      | 10.288473      | 13.229031      | 19.497248      | 3.178E-10 | 3.53819   | up        | PREDICTED: glucan endo-1,3-beta-glucosidase 12 [Sesamum indicum]                    |
| c25595.graph_c0 | 0.8766462      | 0.653872       | 1.3062659      | 3.6718362      | 3.633953       | 3.8690263      | 5.517E-07 | 2.018561  | up        | -                                                                                   |
| c25609.graph_c0 | 17.285338      | 15.561405      | 17.280313      | 37.926842      | 40.24676       | 38.022466      | 8.991E-13 | 1.254189  | up        | PREDICTED: histidine-containing phosphotransfer protein 1 [Sesamum indicum]         |
| c25645.graph_c0 | 2.2618843      | 2.4098779      | 2.1409878      | 4.7593942      | 5.46723        | 3.4185178      | 0.0083138 | 1.045231  | up        | -                                                                                   |
| c25690.graph_c0 | 143.81036      | 168.05798      | 172.19385      | 380.11516      | 387.25734      | 495.78136      | 3.281E-14 | 1.423281  | up        | lipid transfer protein 2 [Tamarix hispida]                                          |
| c25692.graph_c0 | 1.8009833      | 1.9286529      | 1.264529       | 2.9730518      | 3.2058305      | 4.0153447      | 0.0067122 | 1.068841  | up        | PREDICTED: uncharacterized protein LOC105111185 [Sesamum indicum]                   |
| c25695.graph_c0 | 10.937804      | 9.8758115      | 9.5862816      | 3.5944928      | 3.8079293      | 2.2845415      | 0.0002839 | -1.604979 | down      | PREDICTED: plasma membrane ATPase 4-like [Cicer arietinum]                          |
| c25701.graph_c0 | 0              | 0.5633189      | 0.1018187      | 10.913498      | 14.912695      | 24.34728       | 3.499E-11 | 6.272913  | up        | unnamed protein product [Coffea canephora]                                          |
| c25703.graph_c0 | 4.383915       | 3.3440508      | 2.8371204      | 1.1497107      | 2.3344599      | 0.5967533      | 0.0044085 | -1.336103 | down      | hypothetical protein MIMGU_mgv1a015966mg [Erythranthe guttata]                      |
| c25711.graph_c0 | 4.0110107      | 4.1269015      | 4.0341036      | 0.7094304      | 2.0041481      | 1.4729095      | 0.000841  | -1.512707 | down      | -                                                                                   |
| c25720.graph_c0 | 2.3157039      | 1.4188002      | 1.1135116      | 3.5643235      | 5.1086634      | 4.8505503      | 4.509E-05 | 1.516253  | up        | PREDICTED: transcription factor ICE1-like [Sesamum indicum]                         |
| c25720.graph_c1 | 0.6216522      | 0.3929056      | 1.0145263      | 2.679166       | 2.5043396      | 3.5758587      | 1.258E-06 | 2.14861   | up        | PREDICTED: transcription factor ICE1-like, partial [Nicotiana glauca]               |
| c25727.graph_c0 | 0.1653251      | 0.2239096      | 0.2698079      | 1.9908368      | 4.1070977      | 3.4496358      | 3.572E-09 | 3.887035  | up        | Homeobox-leucine zipper A1HB-13-like protein [Gossypium arboreum]                   |
| c25784.graph_c0 | 22.259176      | 20.457424      | 21.677831      | 53.99874       | 61.77375       | 81.072931      | 3.834E-10 | 1.649219  | up        | PREDICTED: uncharacterized protein LOC105164225 [Sesamum indicum]                   |
| c25787.graph_c0 | 2.6657032      | 3.2091734      | 3.0556269      | 8.4474377      | 7.1592288      | 7.0153807      | 0.0002165 | 1.386661  | up        | PREDICTED: uncharacterized protein LOC105111116 [Sesamum indicum]                   |
| c25813.graph_c0 | 7.4811127      | 6.9876655      | 6.4202783      | 23.380158      | 18.706236      | 11.347377      | 0.0089318 | 1.406025  | up        | PREDICTED: root phototropism protein 2-like [Malus domestica]                       |
| c25818.graph_c0 | 90.73385       | 99.552686      | 101.57035      | 525.40226      | 607.84792      | 599.48294      | 1.217E-63 | 2.609112  | up        | PREDICTED: kirola-like isoform X2 [Sesamum indicum]                                 |
| c25846.graph_c0 | 0.7619225      | 0.8408211      | 0.5181021      | 4.6143436      | 3.5809914      | 3.1032324      | 4.032E-09 | 2.462848  | up        | PREDICTED: glucan endo-1,3-beta-glucosidase 5-like [Sesamum indicum]                |
| c25849.graph_c0 | 4.3446971      | 3.3732756      | 3.9220259      | 24.26371       | 23.985191      | 25.472062      | 4.333E-58 | 2.704615  | up        | PREDICTED: cell division cycle 20.2, cofactor of APC complex-like [Sesamum indicum] |
| c25850.graph_c0 | 2.2813428      | 1.9514261      | 2.841324       | 0.5073281      | 0.8061789      | 0.6771262      | 4.581E-05 | -1.795049 | down      | PREDICTED: vacuolar iron transporter 1 [Nicotiana glauca]                           |
| c25870.graph_c0 | 30.332877      | 30.964701      | 23.738165      | 7.3450628      | 13.259806      | 18.206294      | 0.0004029 | -1.101412 | down      | PREDICTED: transcription factor DIVARICA1A-like [Sesamum indicum]                   |
| c25886.graph_c0 | 8.195291       | 8.5095163      | 7.7275357      | 26.085761      | 25.066875      | 30.965055      | 1.915E-19 | 1.790077  | up        | hypothetical protein MIMGU_mgv1a010584mg [Erythranthe guttata]                      |

| #ID             | 28 h-1<br>FPKM | 28 h-2<br>FPKM | 28 h-3<br>FPKM | 48 h-1<br>FPKM | 48 h-2<br>FPKM | 48 h-3<br>FPKM | FDR       | log2FC    | regulated | nr_annotation                                                                                  |
|-----------------|----------------|----------------|----------------|----------------|----------------|----------------|-----------|-----------|-----------|------------------------------------------------------------------------------------------------|
| c25922.graph_c0 | 1.8106213      | 0.9008199      | 1.2663876      | 3.2318697      | 4.9619914      | 6.5015787      | 6.617E-05 | 1.917339  | up        | hypothetical protein MIMGU_mgv1a027056mg [Erythranthe guttata]                                 |
| c25927.graph_c0 | 11.121176      | 12.336551      | 14.778941      | 26.784128      | 29.014562      | 25.265881      | 0.0007404 | 1.125481  | up        | PREDICTED: V-type proton ATPase subunit H [Beta vulgaris subsp. vulgaris]                      |
| c25928.graph_c0 | 5.7889772      | 4.985662       | 3.9243529      | 14.563018      | 18.178437      | 25.614822      | 5.912E-07 | 2.024714  | up        | BnaA07g08260D [Brassica napus]                                                                 |
| c25931.graph_c0 | 8.9479054      | 8.38347        | 8.5016508      | 2.5636319      | 3.8268896      | 4.8732682      | 3.623E-05 | -1.164484 | down      | PREDICTED: putative GATA transcription factor 22 [Nicotiana tomentosiformis]                   |
| c25945.graph_c0 | 0              | 0.0753355      | 0.0340418      | 9.2013087      | 1.9047173      | 14.163035      | 4.153E-05 | 7.900294  | up        | --                                                                                             |
| c25953.graph_c1 | 5.3617837      | 6.051485       | 4.7781481      | 9.2109861      | 11.17898       | 13.288466      | 0.0008499 | 1.094031  | up        | PREDICTED: probable pectate lyase 5 [Sesamum indicum]                                          |
| c25955.graph_c0 | 41.79396       | 41.834697      | 40.458027      | 101.09267      | 122.01942      | 117.44913      | 2.02E-25  | 1.495465  | up        | PREDICTED: probable xyloglucan endotransglucosylase/hydrolase protein 7 [Sesamum indicum]      |
| c25956.graph_c0 | 0.3861575      | 0.9007155      | 0.7877535      | 5.9961684      | 5.7904529      | 6.7145619      | 8.404E-19 | 3.198389  | up        | PREDICTED: protein POLYCHOME-like [Sesamum indicum]                                            |
| c25958.graph_c0 | 18.842025      | 19.795505      | 22.350606      | 45.85072       | 49.978936      | 67.362111      | 1.678E-08 | 1.45762   | up        | -                                                                                              |
| c25980.graph_c0 | 8.1076362      | 9.3315439      | 9.9115306      | 17.805983      | 18.584119      | 22.475885      | 4.192E-10 | 1.145372  | up        | PREDICTED: thioredoxin-like protein CITRX1, chloroplastic [Sesamum indicum]                    |
| c25987.graph_c0 | 1.6740424      | 0.8691144      | 1.2977047      | 7.1616556      | 6.519119       | 8.1189072      | 3.519E-13 | 2.546295  | up        | hypothetical protein MIMGU_mgv1a011925mg [Erythranthe guttata]                                 |
| c25990.graph_c0 | 29.997699      | 29.288204      | 35.213788      | 3.4567538      | 2.5698327      | 3.5614512      | 5.379E-47 | -3.256379 | down      | PREDICTED: espin-like [Sesamum indicum]                                                        |
| c25995.graph_c0 | 2.9884897      | 3.9524775      | 3.400278       | 1.6006186      | 1.5826173      | 1.2343247      | 0.0035535 | -1.182422 | down      | -                                                                                              |
| c25997.graph_c0 | 3.6001687      | 3.4312045      | 3.1009143      | 7.3205809      | 7.6881227      | 5.4422732      | 0.0001274 | 1.057306  | up        | PREDICTED: LOW QUALITY PROTEIN: ADP-ribosylation factor-binding protein GGA3 [Sesamum indicum] |
| c25999.graph_c0 | 20.039997      | 29.625561      | 26.439633      | 112.63901      | 169.05857      | 161.01898      | 2.303E-19 | 2.575524  | up        | PREDICTED: glutamate decarboxylase [Sesamum indicum]                                           |
| c26000.graph_c0 | 5.7537205      | 7.2184132      | 5.9799333      | 14.970385      | 11.14218       | 13.662111      | 0.0001746 | 1.116005  | up        | PREDICTED: uncharacterized protein LOC105169481 [Sesamum indicum]                              |
| c26004.graph_c0 | 10.144985      | 10.130992      | 9.974822       | 25.400951      | 28.979168      | 31.82016       | 6.953E-19 | 1.549569  | up        | unnamed protein product [Vitis vinifera]                                                       |
| c26007.graph_c0 | 0.1929494      | 0.1088845      | 0.1968064      | 2.0789097      | 2.5910032      | 2.3666576      | 3.654E-17 | 3.856601  | up        | PREDICTED: mitotic checkpoint serine/threonine-protein kinase BUB1 [Sesamum indicum]           |
| c26014.graph_c0 | 1.4079411      | 1.2931568      | 1.5252219      | 3.0770157      | 2.8359608      | 3.2307339      | 0.001414  | 1.15569   | up        | PREDICTED: uncharacterized protein LOC105174110 [Sesamum indicum]                              |
| c26020.graph_c0 | 6.0381805      | 5.3265796      | 6.0031406      | 1.5835528      | 1.7707812      | 1.8787143      | 5.437E-05 | -1.691403 | down      | PREDICTED: leucoanthocyanidin dioxygenase [Sesamum indicum]                                    |
| c26026.graph_c0 | 0.3656065      | 0.1650542      | 0.3729149      | 4.0550399      | 4.6640364      | 5.9792201      | 1.385E-15 | 4.060112  | up        | -                                                                                              |
| c26027.graph_c0 | 0.4008512      | 0.1608582      | 0.4361217      | 1.1291298      | 3.0502491      | 3.114548       | 0.0003346 | 2.8947    | up        | PREDICTED: probable xyloglucan endotransglucosylase/hydrolase protein 32 [Sesamum indicum]     |
| c26030.graph_c0 | 0              | 0              | 0              | 6.2035125      | 8.3517505      | 8.2797721      | 4.596E-28 | Inf       | up        | PREDICTED: uncharacterized protein LOC105174142 [Sesamum indicum]                              |
| c26030.graph_c1 | 0.1073859      | 0.0969594      | 0.087626       | 3.5391078      | 8.6521283      | 7.1459821      | 4.787E-10 | 6.078005  | up        | -                                                                                              |
| c26035.graph_c0 | 40.689349      | 38.18097       | 40.733313      | 306.33888      | 333.67517      | 335.88737      | 9.881E-77 | 3.068793  | up        | PREDICTED: polyphenol oxidase 1, chloroplastic-like [Sesamum indicum]                          |

| #ID             | 28 h-1<br>FPKM | 28 h-2<br>FPKM | 28 h-3<br>FPKM | 48 h-1<br>FPKM | 48 h-2<br>FPKM | 48 h-3<br>FPKM | FDR       | log2FC    | regulated | nr_annotation                                                                                          |
|-----------------|----------------|----------------|----------------|----------------|----------------|----------------|-----------|-----------|-----------|--------------------------------------------------------------------------------------------------------|
| c26039.graph_c0 | 10.636519      | 9.2771202      | 8.4431408      | 126.57108      | 81.909489      | 66.593986      | 1.494E-06 | 3.331397  | up        | PREDICTED: uncharacterized protein LOC105177716 [Sesamum indicum]                                      |
| c26040.graph_c0 | 5.4856861      | 5.4131806      | 5.369084       | 1.6338851      | 2.1938192      | 2.2821611      | 4.674E-08 | -1.376483 | down      | PREDICTED: pentatricopeptide repeat-containing protein At1g06710, mitochondrial [Sesamum indicum]      |
| c26045.graph_c0 | 2.5627154      | 2.3879362      | 2.3253642      | 6.9126601      | 7.4883084      | 9.5962406      | 2.677E-13 | 1.760138  | up        | PREDICTED: uncharacterized protein LOC105165819 [Sesamum indicum]                                      |
| c26048.graph_c0 | 15.397411      | 13.619977      | 14.124047      | 48.947583      | 45.739827      | 48.923919      | 4.915E-31 | 1.77787   | up        | PREDICTED: uncharacterized protein LOC105164115 [Sesamum indicum]                                      |
| c26050.graph_c0 | 17.183576      | 18.67169       | 19.872073      | 45.703486      | 39.107812      | 38.661756      | 7.718E-12 | 1.193017  | up        | PREDICTED: uncharacterized protein LOC105165176 [Sesamum indicum]                                      |
| c26064.graph_c0 | 0.3677926      | 0.5396337      | 0.4126592      | 3.3799809      | 2.654642       | 2.6445141      | 8.453E-10 | 2.764488  | up        | PREDICTED: basic leucine zipper 9-like [Sesamum indicum]                                               |
| c26066.graph_c0 | 0.4822727      | 1.0341866      | 0.9592307      | 1.9485702      | 2.6714132      | 4.1815804      | 0.0013069 | 1.862797  | up        | PREDICTED: origin of replication complex subunit 6 [Sesamum indicum]                                   |
| c26068.graph_c0 | 8.0994335      | 11.887846      | 11.679044      | 0.8907121      | 0.7946117      | 0.5422712      | 3.084E-22 | -3.781776 | down      | PREDICTED: flavonol synthase/flavanone 3-hydroxylase-like [Sesamum indicum]                            |
| c26074.graph_c0 | 1242.653       | 1420.56        | 1543.2281      | 432.2842       | 418.35904      | 447.23427      | 5.812E-17 | -1.654411 | down      | PREDICTED: embryonic protein DC-8 [Nicotiana glauca]                                                   |
| c26079.graph_c0 | 2.8066639      | 2.7584158      | 2.5131561      | 0.8185751      | 1.3674778      | 1.2046006      | 0.0017668 | -1.218554 | down      | PREDICTED: putative E3 ubiquitin-protein ligase XBAT31 [Sesamum indicum]                               |
| c26085.graph_c0 | 1.6270947      | 2.203671       | 1.1380251      | 5.4507935      | 4.2137913      | 4.9811666      | 0.0002313 | 1.606369  | up        | PREDICTED: cycloartenol synthase-like isoform X1 [Sesamum indicum]                                     |
| c26089.graph_c1 | 17.378655      | 19.071437      | 16.955353      | 37.788407      | 51.516137      | 55.665369      | 1.855E-11 | 1.476659  | up        | Phosphoenolpyruvate carboxylase family protein [Theobroma cacao]                                       |
| c26096.graph_c0 | 4.0318445      | 2.9212907      | 2.9650187      | 17.224817      | 17.111307      | 23.13016       | 1.378E-21 | 2.574134  | up        | PREDICTED: thylakoid lumenal 16.5 kDa protein, chloroplastic [Sesamum indicum]                         |
| c26098.graph_c0 | 13.512093      | 14.700185      | 16.448262      | 5.0540381      | 2.379618       | 2.6232808      | 2.516E-08 | -2.093818 | down      | PREDICTED: UDP-glycosyltransferase 7C3 isoform X2 [Vitis vinifera]                                     |
| c26098.graph_c1 | 15.687204      | 12.96711       | 16.090933      | 4.1309735      | 3.7086996      | 4.1741175      | 2.72E-10  | -1.854159 | down      | PREDICTED: UDP-glycosyltransferase 7C3-like [Sesamum indicum]                                          |
| c26107.graph_c0 | 1.269223       | 0.9256068      | 1.115343       | 7.6110208      | 5.4408549      | 6.6070639      | 7.902E-12 | 2.617091  | up        | PREDICTED: LOW QUALITY PROTEIN: anthranilate synthase alpha subunit 1, chloroplastic [Sesamum indicum] |
| c26109.graph_c0 | 0.9787999      | 0.8837645      | 0.8681442      | 1.6183056      | 1.942985       | 2.3999309      | 0.0066537 | 1.163292  | up        | PREDICTED: uncharacterized protein LOC105156341 [Sesamum indicum]                                      |
| c26120.graph_c0 | 3.0273167      | 2.8137767      | 3.2694693      | 0.1128631      | 0.0797099      | 0.3012748      | 4.205E-17 | -4.171176 | down      | PREDICTED: cytochrome P450 76C1-like [Sesamum indicum]                                                 |
| c26125.graph_c0 | 1.9504634      | 1.9401791      | 1.6455135      | 3.3942516      | 3.4626203      | 4.3997751      | 0.0035329 | 1.063719  | up        | PREDICTED: cytochrome P450 90B1 [Sesamum indicum]                                                      |
| c26134.graph_c0 | 10.125871      | 9.2279987      | 9.4187795      | 18.05561       | 22.17193       | 23.608589      | 1.514E-14 | 1.187381  | up        | PREDICTED: probable methyltransferase PMT2 [Sesamum indicum]                                           |
| c26138.graph_c0 | 1.9131598      | 2.8988618      | 2.5121516      | 4.9616395      | 5.9059049      | 6.2006137      | 7.407E-06 | 1.259201  | up        | PREDICTED: glycerol-3-phosphate 2-O-acyltransferase 6-like [Sesamum indicum]                           |
| c26146.graph_c0 | 2.0684128      | 2.5430916      | 2.5855782      | 4.5743187      | 6.0869684      | 3.8220183      | 0.0070879 | 1.048852  | up        | PREDICTED: uncharacterized protein LOC100267130 [Vitis vinifera]                                       |
| c26148.graph_c0 | 0.3211953      | 1.0440333      | 0.3145113      | 3.9085318      | 2.6741475      | 3.477788       | 5.724E-09 | 2.631812  | up        | PREDICTED: protein CHUP1, chloroplastic isoform X1 [Sesamum indicum]                                   |
| c26158.graph_c0 | 0.3693567      | 0.1333978      | 0.4822273      | 3.7454945      | 3.4719101      | 3.9159442      | 4.817E-13 | 3.539472  | up        | PREDICTED: shikimate O-hydroxycinnamoyltransferase-like [Sesamum indicum]                              |
| c26161.graph_c0 | 6.5910129      | 7.4388334      | 8.0673191      | 0.3481081      | 0.1843892      | 0.4646167      | 8.58E-15  | -4.425528 | down      | hypothetical protein MIMGU_mgv1a020481mg, partial [Erythranthe outtata]                                |

| #ID             | 28 h-1<br>FPKM | 28 h-2<br>FPKM | 28 h-3<br>FPKM | 48 h-1<br>FPKM | 48 h-2<br>FPKM | 48 h-3<br>FPKM | FDR       | log2FC    | regulated | nr_annotation                                                                               |
|-----------------|----------------|----------------|----------------|----------------|----------------|----------------|-----------|-----------|-----------|---------------------------------------------------------------------------------------------|
| c26161.graph_c1 | 15.575828      | 21.977513      | 20.461905      | 1.6677746      | 1.7927874      | 1.6149149      | 2.589E-29 | -3.473134 | down      | PREDICTED: beta-galactosidase 15-like [Sesamum indicum]                                     |
| c26162.graph_c1 | 3.0594438      | 2.2444426      | 2.4964811      | 7.7561406      | 8.4734621      | 10.136383      | 3.307E-05 | 1.795827  | up        | hypothetical protein MIMGU_mgv1a0223741mg, partial [Erythranthe guttata]                    |
| c26163.graph_c0 | 4.4396736      | 4.6099004      | 3.47179        | 10.129704      | 23.101874      | 26.038566      | 0.0004875 | 2.271188  | up        | PREDICTED: hyoscyamine 6-dioxygenase-like [Sesamum indicum]                                 |
| c26177.graph_c0 | 63.293689      | 64.527301      | 59.025295      | 22.206355      | 27.027413      | 27.407758      | 2.644E-16 | -1.247226 | down      | PREDICTED: growth-regulating factor 4-like isoform X1 [Sesamum indicum]                     |
| c26178.graph_c1 | 0.4322627      | 0.4203152      | 0.9767708      | 4.8048786      | 4.3757742      | 2.9252409      | 1.462E-08 | 2.772077  | up        | PREDICTED: U-box domain-containing protein 4-like [Nicotiana glauca]                        |
| c26182.graph_c0 | 0              | 0.0268336      | 0.0242506      | 1.7705461      | 4.0307141      | 4.6257049      | 1.449E-11 | 7.70103   | up        | PREDICTED: agmatine coumaroyltransferase-2-like [Sesamum indicum]                           |
| c26184.graph_c0 | 8.6751072      | 9.6311574      | 11.123855      | 40.899643      | 62.7635        | 74.332057      | 7.235E-10 | 2.629345  | up        | hypothetical protein MIMGU_mgv1a010851mg [Erythranthe guttata]                              |
| c26186.graph_c0 | 5.6015708      | 5.9412662      | 6.0852697      | 11.933811      | 10.558011      | 12.064899      | 3.519E-05 | 1.014411  | up        | PREDICTED: rop guanine nucleotide exchange factor 14 [Sesamum indicum]                      |
| c26191.graph_c0 | 1.5588583      | 0.9080664      | 1.1899501      | 2.7408585      | 2.4984527      | 2.6656645      | 0.0071213 | 1.155229  | up        | hypothetical protein MIMGU_mgv1a008195mg [Erythranthe guttata]                              |
| c26193.graph_c0 | 2.9671099      | 5.258821       | 3.0488397      | 0.5571897      | 1.4756872      | 1.2394601      | 0.0023504 | -1.756474 | down      | PREDICTED: GATA transcription factor 2-like [Sesamum indicum]                               |
| c26203.graph_c0 | 1.7910369      | 2.004061       | 1.7214878      | 0.4456974      | 0.6639783      | 0.5700821      | 1.232E-06 | -1.6794   | down      | PREDICTED: receptor-like protein kinase isoform X1 [Sesamum indicum]                        |
| c26216.graph_c0 | 0.6888661      | 0.6219815      | 0.6870223      | 4.2689218      | 13.875561      | 15.193844      | 9.516E-05 | 4.084407  | up        | PREDICTED: blue copper protein [Sesamum indicum]                                            |
| c26227.graph_c0 | 0.7307305      | 0.560814       | 0.7751512      | 2.1303859      | 2.9928264      | 4.3269234      | 2.267E-05 | 2.225547  | up        | PREDICTED: probable pectinesterase 53 [Sesamum indicum]                                     |
| c26233.graph_c0 | 3.2598036      | 2.8732186      | 3.4832982      | 9.6742235      | 10.90875       | 10.358859      | 8.693E-13 | 1.725924  | up        | PREDICTED: uncharacterized protein LOC105176469 [Sesamum indicum]                           |
| c26240.graph_c0 | 7.2938894      | 9.1122869      | 8.484681       | 3.6827107      | 3.3880452      | 4.8290477      | 4.813E-07 | -1.024104 | down      | PREDICTED: uncharacterized protein LOC105167578 [Sesamum indicum]                           |
| c26248.graph_c0 | 9.86302        | 10.313675      | 10.518737      | 36.86667       | 36.653283      | 49.309094      | 1.823E-17 | 2.040088  | up        | PREDICTED: photosystem II reaction center W protein, chloroplastic [Sesamum indicum]        |
| c26259.graph_c0 | 1.5457725      | 1.9938395      | 2.2523888      | 10.170118      | 13.838174      | 15.940068      | 3.507E-18 | 2.82106   | up        | putative cyclin-dependent kinase B1-2 [Oryza sativa Japonica Group]                         |
| c26269.graph_c0 | 0.6218667      | 0.4491899      | 0.4566943      | 1.9312415      | 1.5031221      | 0.9819469      | 0.0032333 | 1.582371  | up        | PREDICTED: phosphoinositide 3-kinase A1-gamma3, chloroplastic [Sesamum indicum]             |
| c26275.graph_c0 | 2.9175786      | 3.6612304      | 3.3491489      | 8.2740413      | 8.4333229      | 5.8562892      | 0.0004501 | 1.229247  | up        | PREDICTED: CASP-like protein 4A3 [Sesamum indicum]                                          |
| c26282.graph_c0 | 5.4709327      | 4.2031115      | 5.5215556      | 9.2464135      | 9.3443475      | 12.286977      | 0.0003057 | 1.061978  | up        | PREDICTED: inorganic pyrophosphatase 3 [Sesamum indicum]                                    |
| c26286.graph_c0 | 1.0655355      | 1.8259861      | 2.2357756      | 3.6660358      | 4.3801358      | 6.3768745      | 0.0002761 | 1.52724   | up        | PREDICTED: mini-chromosome maintenance complex-binding protein isoform X1 [Sesamum indicum] |
| c26289.graph_c0 | 0.1301537      | 0.1175166      | 0.1062044      | 1.8697669      | 1.1069128      | 2.1041004      | 3.177E-09 | 3.889872  | up        | PREDICTED: F-box/keich-repeat protein SKIP25-like [Sesamum indicum]                         |
| c26291.graph_c0 | 12.368733      | 12.284587      | 10.092785      | 5.1215715      | 4.8720428      | 5.7661816      | 0.002344  | -1.098665 | down      | PREDICTED: uncharacterized protein LOC105169169 isoform X2 [Sesamum indicum]                |
| c26294.graph_c1 | 5.4957445      | 4.7440259      | 5.4208032      | 14.85115       | 10.461629      | 9.8086741      | 0.0010788 | 1.215023  | up        | PREDICTED: probable BOI-related E3 ubiquitin-protein ligase 2 [Sesamum indicum]             |
| c26297.graph_c0 | 2.866032       | 3.4284512      | 3.3358533      | 7.8928124      | 8.0684352      | 9.0740801      | 7.393E-13 | 1.419019  | up        | O-Glycosyl hydrolases family 17 protein [Theobroma cacao]                                   |
| c26323.graph_c0 | 0.1760033      | 0.4540413      | 0.3487847      | 1.0836145      | 1.418066       | 2.1268978      | 2.977E-05 | 2.275754  | up        | PREDICTED: putative glycosyltransferase 5 [Sesamum indicum]                                 |
| c26325.graph_c0 | 291.45287      | 322.60597      | 326.45968      | 48.876407      | 49.913718      | 45.517006      | 8.463E-64 | -2.661842 | down      | PREDICTED: uncharacterized protein LOC105175521 [Sesamum indicum]                           |



| #ID             | 28 h-1<br>FPKM | 28 h-2<br>FPKM | 28 h-3<br>FPKM | 48 h-1<br>FPKM | 48 h-2<br>FPKM | 48 h-3<br>FPKM | FDR       | log2FC    | regulated | nr_annotation                                                                                          |
|-----------------|----------------|----------------|----------------|----------------|----------------|----------------|-----------|-----------|-----------|--------------------------------------------------------------------------------------------------------|
| c26326.graph_c0 | 0              | 0              | 0.0503568      | 1.6427262      | 2.4032289      | 2.2273339      | 3.346E-20 | 6.991393  | up        | PREDICTED: MLP-like protein 423 [Cucumis melo]                                                         |
| c26328.graph_c0 | 0.9811329      | 0.6286826      | 1.1105047      | 23.228326      | 19.380074      | 26.165726      | 6.463E-51 | 4.702053  | up        | PREDICTED: bifunctional L-3-cyanoalanine synthase/cysteine synthase 1, mitochondrial [Sesamum indicum] |
| c26333.graph_c0 | 23.605035      | 23.163675      | 25.605129      | 122.90951      | 135.83867      | 151.87693      | 3.197E-65 | 2.543369  | up        | 4-coumarate coenzyme A ligase [Paulownia fortunei]                                                     |
| c26336.graph_c0 | 1.6431444      | 1.9419549      | 2.3436615      | 6.9426884      | 6.7808927      | 7.4733438      | 2.445E-18 | 1.879431  | up        | PREDICTED: uncharacterized protein LOC104091376 [Nicotiana tomentosiformis]                            |
| c26346.graph_c0 | 0.3700138      | 0.5396803      | 0.2090273      | 6.5301982      | 5.3126823      | 5.7784287      | 7.639E-27 | 4.024421  | up        | PREDICTED: G2/mitotic-specific cyclin-2-like isoform X2 [Sesamum indicum]                              |
| c26348.graph_c0 | 6.6828145      | 6.1467392      | 7.1094442      | 0.8708463      | 0.7548186      | 0.8453169      | 3.746E-17 | -2.9687   | down      | hypothetical protein MIMGU_mgv1a024370mg [Erythranthe guttata]                                         |
| c26351.graph_c0 | 0.2117855      | 0.1274816      | 0.1267312      | 2.8098156      | 3.1283358      | 3.7104241      | 4.646E-32 | 4.410612  | up        | PREDICTED: kinesin-like protein KIF22 [Sesamum indicum]                                                |
| c26353.graph_c0 | 0.4804091      | 0.8218693      | 0.412642       | 1.6345604      | 1.5958053      | 2.0818197      | 5.188E-05 | 1.672526  | up        | PREDICTED: cytochrome P450 711A1 [Sesamum indicum]                                                     |
| c26367.graph_c0 | 0.9332333      | 0.9830592      | 0.7615107      | 2.5137515      | 2.7674469      | 1.8420055      | 0.0007304 | 1.455294  | up        | PREDICTED: dehydration-responsive protein RD22 [Sesamum indicum]                                       |
| c26372.graph_c0 | 1.0208847      | 1.1137971      | 0.8330335      | 3.5586278      | 3.8270549      | 3.4063279      | 3.281E-06 | 1.904694  | up        | PREDICTED: protein trichome birefringence-like 58 [Sesamum indicum]                                    |
| c26373.graph_c0 | 0.9778958      | 0.9329264      | 1.4302966      | 2.0113532      | 2.4528802      | 3.1215523      | 0.0005316 | 1.218598  | up        | PREDICTED: condensin-2 complex subunit H2 isoform X1 [Sesamum indicum]                                 |
| c26376.graph_c0 | 0.4110318      | 0.5904232      | 0.3353986      | 0.7104723      | 0.9533684      | 1.2432755      | 0.0059977 | 1.156267  | up        | PREDICTED: putative serine/threonine-protein kinase-like protein CCR3 [Sesamum indicum]                |
| c26388.graph_c0 | 0.206422       | 0.2631242      | 0.3071528      | 2.2625465      | 2.5273368      | 2.9855623      | 1.179E-21 | 3.361768  | up        | PREDICTED: kinesin-like protein KCA1 [Sesamum indicum]                                                 |
| c26407.graph_c0 | 2.2700838      | 1.5372546      | 1.6671328      | 7.1937459      | 7.0112294      | 7.4891136      | 4.758E-08 | 2.028508  | up        | PREDICTED: EPIDERMAL PATTERNING FACTOR-like protein 4 [Sesamum indicum]                                |
| c26421.graph_c0 | 2.4037092      | 2.4169518      | 2.1397168      | 9.6946132      | 8.656368       | 4.2514885      | 0.0053446 | 1.749343  | up        | PREDICTED: homeobox-leucine zipper protein HAT22-like [Sesamum indicum]                                |
| c26422.graph_c0 | 37.687836      | 37.75659       | 43.393601      | 16.251961      | 16.258167      | 15.441297      | 1.305E-16 | -1.267021 | down      | hypothetical protein MIMGU_mgv1a006265mg [Erythranthe guttata]                                         |
| c26423.graph_c0 | 15.775479      | 13.837706      | 12.477449      | 42.624293      | 42.22854       | 34.961367      | 1.461E-17 | 1.553321  | up        | hypothetical protein MIMGU_mgv1a008823mg [Erythranthe guttata]                                         |
| c26424.graph_c0 | 4.0247933      | 5.0596614      | 4.6231409      | 11.616228      | 9.3957861      | 8.9742057      | 5.078E-06 | 1.17635   | up        | unnamed protein product [Coffea canephora]                                                             |
| c26427.graph_c0 | 0              | 0.2102695      | 0.0316715      | 1.0823764      | 2.8666165      | 2.8017223      | 5.133E-07 | 4.832445  | up        | hypothetical protein MIMGU_mgv1a010556mg [Erythranthe guttata]                                         |
| c26431.graph_c0 | 9.1072013      | 8.1847026      | 8.2609538      | 4.1880734      | 3.6972966      | 3.8698503      | 0.0005876 | -1.075949 | down      | hypothetical protein MIMGU_mgv1a020357mg [Erythranthe guttata]                                         |
| c26438.graph_c0 | 3.4311096      | 4.7257173      | 3.9860953      | 0.14743        | 0.3123684      | 0.1967735      | 3.333E-15 | -4.176973 | down      | PREDICTED: probable trehalose-phosphate phosphatase J [Nicotiana tomentosiformis]                      |
| c26446.graph_c0 | 2.7008475      | 2.0416287      | 3.3826834      | 10.429803      | 8.097059       | 7.7218396      | 1.819E-06 | 1.738726  | up        | PREDICTED: uncharacterized protein LOC105170675 [Sesamum indicum]                                      |
| c26452.graph_c0 | 9.1731534      | 7.8404541      | 7.947788       | 23.614576      | 49.791351      | 75.38784       | 0.0022997 | 2.602716  | up        | PREDICTED: subtilisin-like protease [Sesamum indicum]                                                  |
| c26474.graph_c0 | 0.8982812      | 0.7394993      | 0.970134       | 4.018721       | 4.824994       | 5.2743548      | 1.079E-12 | 2.474064  | up        | PREDICTED: acetylmethionine deacetylase [Sesamum indicum]                                              |
| c26478.graph_c0 | 5.1150131      | 3.6357438      | 4.3514178      | 12.829362      | 20.971295      | 23.997076      | 3.021E-07 | 2.173366  | up        | PREDICTED: 21 kDa protein-like [Sesamum indicum]                                                       |

| #ID             | 28 h-1<br>FPKM | 28 h-2<br>FPKM | 28 h-3<br>FPKM | 48 h-1<br>FPKM | 48 h-2<br>FPKM | 48 h-3<br>FPKM | FDR       | log2FC    | regulated | nr_annotation                                                                                 |
|-----------------|----------------|----------------|----------------|----------------|----------------|----------------|-----------|-----------|-----------|-----------------------------------------------------------------------------------------------|
| c26489.graph_c0 | 24.521614      | 21.356807      | 24.104633      | 58.300667      | 81.468474      | 90.686734      | 5.196E-11 | 1.754354  | up        | PREDICTED: L-gulonolactone oxidase, partial [Sesamum indicum]                                 |
| c26496.graph_c0 | 15.239452      | 16.564341      | 17.544025      | 8.4896932      | 7.6577649      | 6.815092       | 5.221E-09 | -1.058578 | down      | PREDICTED: methionine gamma-lyase [Sesamum indicum]                                           |
| c26497.graph_c0 | 0.6277148      | 0.8001425      | 0.3916901      | 1.1233056      | 1.2395896      | 1.832436       | 0.0034774 | 1.243157  | up        | PREDICTED: uncharacterized protein LOC105170157 isoform X1 [Sesamum indicum]                  |
| c26519.graph_c0 | 2.3982267      | 2.5984486      | 2.1441183      | 5.2075304      | 4.6766333      | 5.4333419      | 5.051E-05 | 1.14426   | up        | PREDICTED: uncharacterized protein LOC105156252 [Sesamum indicum]                             |
| c26523.graph_c0 | 4.5037802      | 3.6104362      | 3.1942005      | 9.7104198      | 11.643541      | 11.251345      | 2.979E-08 | 1.566864  | up        | PREDICTED: epidermal growth factor receptor substrate 15-like [Sesamum indicum]               |
| c26525.graph_c0 | 1.8336725      | 2.4739363      | 2.5281664      | 8.4156229      | 8.4907924      | 9.0808927      | 6.428E-16 | 1.967936  | up        | PREDICTED: probable receptor-like protein kinase At5g15080 [Sesamum indicum]                  |
| c26527.graph_c0 | 4.6751961      | 3.9157775      | 4.2666889      | 13.645752      | 12.266966      | 10.09513       | 8.933E-10 | 1.531534  | up        | PREDICTED: R-box/keich-repeat protein SKIP25-like [Sesamum indicum]                           |
| c26528.graph_c0 | 177.1579       | 175.35939      | 203.43487      | 84.570643      | 76.017744      | 67.83942       | 8.221E-17 | -1.238196 | down      | unnamed protein product [Coffea canephora]                                                    |
| c26530.graph_c0 | 2.0573063      | 1.7718214      | 2.8926071      | 7.8634817      | 10.455509      | 11.244984      | 5.511E-15 | 2.172328  | up        | hypothetical protein MIMGU_mgv1a009832mg [Erythranthe guttata]                                |
| c26547.graph_c0 | 2.3585725      | 2.3851182      | 3.3872536      | 10.045272      | 14.822434      | 15.109853      | 3.448E-10 | 2.331909  | up        | -                                                                                             |
| c26569.graph_c0 | 9.2694895      | 9.1525892      | 9.5543088      | 22.674977      | 24.530933      | 25.434061      | 1.815E-10 | 1.416785  | up        | PREDICTED: uncharacterized protein LOC105155725 [Sesamum indicum]                             |
| c26580.graph_c0 | 3.4231284      | 3.7376681      | 3.0747347      | 0.739996       | 1.2828044      | 1.316888       | 2.858E-05 | -1.583271 | down      | PREDICTED: transcription factor TCP5-like [Sesamum indicum]                                   |
| c26585.graph_c0 | 1.6209402      | 2.0071639      | 2.4374992      | 7.8664168      | 5.5349463      | 5.6152628      | 5.989E-06 | 1.697432  | up        | PREDICTED: probable isoprenylcysteine alpha-carbonyl methylesterase IC MEL2 [Sesamum indicum] |
| c26591.graph_c0 | 9887.9202      | 10697.499      | 11635.043      | 3386.9316      | 2759.4004      | 3193.9919      | 1.965E-08 | -1.741675 | down      | -                                                                                             |
| c26595.graph_c0 | 8.2329145      | 8.7167221      | 8.2375365      | 2.5468384      | 3.0270989      | 1.7687114      | 3.137E-07 | -1.735521 | down      | PREDICTED: homeobox-leucine zipper protein HAT22-like [Sesamum indicum]                       |
| c26598.graph_c0 | 43.286369      | 43.908484      | 41.418304      | 11.009698      | 19.050992      | 23.148576      | 8.552E-12 | -1.242047 | down      | PREDICTED: uncharacterized protein LOC105161463 [Sesamum indicum]                             |
| c26605.graph_c0 | 2.8066555      | 2.1821819      | 2.799143       | 9.437635       | 9.7363014      | 9.8044704      | 7.979E-11 | 1.936747  | up        | hypothetical protein MIMGU_mgv1a010920mg [Erythranthe guttata]                                |
| c26610.graph_c0 | 1.4619843      | 1.0725282      | 1.4539288      | 4.5750202      | 5.2761317      | 8.0901215      | 1.498E-06 | 2.204673  | up        | PREDICTED: DNA primase small subunit [Sesamum indicum]                                        |
| c26612.graph_c0 | 5.7478571      | 7.2046303      | 5.7386031      | 10.714459      | 12.349529      | 15.406397      | 0.0004624 | 1.079329  | up        | PREDICTED: gibberellin-regulated protein 9-like [Solanum tuberosum]                           |
| c26624.graph_c0 | 2.267818       | 2.2092818      | 2.8488283      | 13.162763      | 17.029739      | 16.12103       | 6.131E-31 | 2.697594  | up        | PREDICTED: vinorine synthase-like [Sesamum indicum]                                           |
| c26626.graph_c0 | 0.1944867      | 0.4097409      | 0.1057997      | 1.8900341      | 1.8281522      | 3.2903627      | 4.034E-07 | 3.342522  | up        | -                                                                                             |
| c26629.graph_c0 | 0.6760081      | 0.8392614      | 0.8619017      | 2.5171144      | 3.2339344      | 4.3364661      | 2.992E-07 | 2.120257  | up        | PREDICTED: lysine-rich arabinogalactan protein 19 [Sesamum indicum]                           |
| c26648.graph_c0 | 7.2341188      | 3.5426338      | 6.6033357      | 9.6360383      | 11.196106      | 17.009886      | 0.00612   | 1.157425  | up        | -                                                                                             |
| c26651.graph_c0 | 37.733157      | 37.186687      | 37.178069      | 13.436654      | 18.674626      | 16.891756      | 6.496E-11 | -1.157078 | down      | hypothetical protein AMTR_s00062p00211520 [Amborella trichopoda]                              |
| c26655.graph_c0 | 7.7162346      | 5.2252773      | 6.6899084      | 13.6525        | 18.132928      | 16.680716      | 0.0004946 | 1.340904  | up        | BnaA05g08010D [Brassica napus]                                                                |
| c26663.graph_c0 | 1.6916762      | 1.2924365      | 1.5290518      | 21.080356      | 12.686299      | 10.978377      | 6.278E-06 | 3.363483  | up        | PREDICTED: uncharacterized calcium-binding protein At1g02270 [Sesamum indicum]                |

| #ID             | 28 h-1<br>FPKM | 28 h-2<br>FPKM | 28 h-3<br>FPKM | 48 h-1<br>FPKM | 48 h-2<br>FPKM | 48 h-3<br>FPKM | FDR       | log2FC    | regulated | nr_annotation                                                                                    |
|-----------------|----------------|----------------|----------------|----------------|----------------|----------------|-----------|-----------|-----------|--------------------------------------------------------------------------------------------------|
| c26665.graph_c0 | 8.1292051      | 8.1584873      | 6.781321       | 21.949449      | 23.618007      | 26.04065       | 2.73E-21  | 1.674357  | up        | PREDICTED: uncharacterized protein LOC105157763 [Sesamum indicum]                                |
| c26667.graph_c0 | 3.2615588      | 3.0037795      | 4.5776173      | 52.587864      | 35.826384      | 56.356842      | 2.081E-17 | 3.783531  | up        | hypothetical protein CARUB_v10021660mg, partial [Capsella rubella]                               |
| c26682.graph_c0 | 2.5341116      | 1.9896219      | 1.9779094      | 15.502227      | 15.387062      | 21.746963      | 2.706E-16 | 3.056359  | up        | PREDICTED: transcription factor bHLH35-like isoform X1 [Nicotiana tomentosiformis]               |
| c26690.graph_c0 | 9.6204003      | 8.5192749      | 8.1795458      | 2.7928114      | 4.3137497      | 4.0784791      | 1.103E-08 | -1.19986  | down      | PREDICTED: putative pentatricopeptide repeat-containing protein At5g59900 [Sesamum indicum]      |
| c26692.graph_c1 | 4.4297177      | 5.4112503      | 8.5049729      | 14.20263       | 14.346152      | 17.927496      | 0.0013523 | 1.380102  | up        | PREDICTED: fasciclin-like arabinogalactan protein 1 / [Sesamum indicum]                          |
| c26694.graph_c0 | 5.1130151      | 4.2948609      | 4.4193111      | 12.60093       | 16.052481      | 17.260406      | 2.549E-22 | 1.76839   | up        | PREDICTED: putative inactive cadmium/zinc-transporting ATPase HMA3 [Sesamum indicum]             |
| c26696.graph_c0 | 1.5991161      | 1.1594568      | 1.4037191      | 3.5318895      | 3.6765372      | 5.4928127      | 1.674E-06 | 1.647009  | up        | PREDICTED: glutamate synthase 1 [NADH], chloroplastic isoform X1 [Sesamum indicum]               |
| c26708.graph_c0 | 11.155897      | 8.5194574      | 9.8688036      | 46.717901      | 75.32297       | 64.264856      | 5.739E-16 | 2.69108   | up        | PREDICTED: intracellular ribonuclease LX-like [Sesamum indicum]                                  |
| c26715.graph_c1 | 3.8584223      | 4.2337769      | 4.2416498      | 6.5720588      | 8.2756014      | 9.8671817      | 1.292E-06 | 1.039114  | up        | hypothetical protein MIMGU_mgv1a001258mg [Erythranthe guttata]                                   |
| c26734.graph_c0 | 1209.2895      | 1213.802       | 1308.5701      | 560.33567      | 351.89552      | 250.57226      | 1.048E-15 | -1.627371 | down      | hypothetical protein MIMGU_mgv1a014589mg [Erythranthe guttata]                                   |
| c26738.graph_c0 | 3.3681706      | 3.1097394      | 3.5336568      | 6.6769631      | 12.038439      | 11.625176      | 1.677E-05 | 1.631352  | up        | PREDICTED: UPF0496 protein At4g34320-like [Sesamum indicum]                                      |
| c26739.graph_c0 | 24.303702      | 17.89939       | 22.164754      | 53.035904      | 65.399979      | 67.830385      | 1.265E-16 | 1.57051   | up        | PREDICTED: NAC domain-containing protein 100-like [Sesamum indicum]                              |
| c26752.graph_c0 | 1.520038       | 1.0979614      | 1.1726838      | 6.7962084      | 9.129591       | 7.761645       | 2.367E-19 | 2.681323  | up        | PREDICTED: cytochrome P450 84A1-like [Sesamum indicum]                                           |
| c26753.graph_c0 | 1.1220695      | 0.6754157      | 1.2716661      | 6.55841        | 4.6039905      | 4.2185304      | 7.259E-07 | 2.374584  | up        | hypothetical protein CICLE_v10022498mg [Citrus clementina]                                       |
| c26754.graph_c0 | 0.0313464      | 0.1698172      | 0.0511568      | 0.7946777      | 1.1365173      | 0.8838743      | 2.501E-12 | 3.519328  | up        | PREDICTED: probable receptor-like protein kinase At5g20050 [Sesamum indicum]                     |
| c26760.graph_c0 | 14.889546      | 12.607357      | 12.122748      | 52.384714      | 52.074008      | 50.940623      | 3.699E-40 | 2.014227  | up        | PREDICTED: NAC domain-containing protein 18 [Sesamum indicum]                                    |
| c26763.graph_c0 | 2.0220502      | 1.6109309      | 1.6014477      | 2.9400236      | 3.2743216      | 5.0307988      | 0.0051608 | 1.139556  | up        | unnamed protein product [Coffea canephora]                                                       |
| c26764.graph_c0 | 13.396864      | 12.269789      | 12.87987       | 5.7943672      | 6.0320706      | 5.5003635      | 1.262E-12 | -1.111543 | down      | PREDICTED: dentin sialophosphoprotein [Sesamum indicum]                                          |
| c26765.graph_c0 | 9.5484417      | 8.6648898      | 9.4441824      | 26.651828      | 26.744952      | 30.078427      | 3.256E-16 | 1.634583  | up        | PREDICTED: uncharacterized protein LOC105158052 [Sesamum indicum]                                |
| c26773.graph_c0 | 71.432231      | 65.716122      | 70.53591       | 17.092935      | 17.669091      | 14.152656      | 3.225E-45 | -2.042856 | down      | PREDICTED: flavonoid 3'-monooxygenase-like [Sesamum indicum]                                     |
| c26775.graph_c0 | 3.0023425      | 2.7724437      | 2.6169247      | 10.725127      | 10.628941      | 18.085815      | 2.988E-06 | 2.270104  | up        | PREDICTED: transcription factor bHLH35-like isoform X2 [Sesamum indicum]                         |
| c26777.graph_c0 | 13.942214      | 13.828127      | 14.003618      | 4.8007559      | 5.7851188      | 5.1794165      | 5.934E-12 | -1.36644  | down      | PREDICTED: pentatricopeptide repeat-containing protein At5g47360 [Sesamum indicum]               |
| c26779.graph_c0 | 1.8384499      | 0.9808783      | 1.2955928      | 8.0238899      | 8.2197992      | 10.414875      | 2.102E-27 | 2.734915  | up        | PREDICTED: probable leucine-rich repeat receptor-like protein kinase At1g35710 [Sesamum indicum] |
| c26780.graph_c0 | 7.3479053      | 8.0166507      | 8.55655        | 1.5523352      | 1.8500748      | 1.7265731      | 9.2E-08   | -2.182346 | down      | PREDICTED: desiccation-related protein PCC3-06 isoform X2 [Sesamum indicum]                      |

| #ID             | 28 h-1<br>FPKM | 28 h-2<br>FPKM | 28 h-3<br>FPKM | 48 h-1<br>FPKM | 48 h-2<br>FPKM | 48 h-3<br>FPKM | FDR       | log2FC    | regulated | nr_annotation                                                                                          |
|-----------------|----------------|----------------|----------------|----------------|----------------|----------------|-----------|-----------|-----------|--------------------------------------------------------------------------------------------------------|
| c26781.graph_c0 | 0.3708786      | 0.1785966      | 0.3833363      | 1.7864407      | 1.5936988      | 2.3982899      | 4.727E-10 | 2.670473  | up        | PREDICTED: rop guanine nucleotide exchange factor 5-like [Sesamum indicum]                             |
| c26783.graph_c0 | 4.6679464      | 4.5127283      | 5.3479985      | 26.357393      | 43.688206      | 42.54449       | 2.143E-14 | 2.987062  | up        | -                                                                                                      |
| c26785.graph_c0 | 0.5099809      | 0.6139532      | 0.6319167      | 7.5657229      | 11.36299       | 13.037798      | 2.365E-20 | 4.21996   | up        | 1-deoxy-D-xylulose-5-phosphate synthase [Andrographis paniculata]                                      |
| c26786.graph_c0 | 1.2838468      | 1.1229685      | 1.1130841      | 1.9325024      | 2.4782523      | 3.2580549      | 0.0048006 | 1.158771  | up        | hypothetical protein MIMGU_mgv1a013028mg [Erythranthe guttata]                                         |
| c26790.graph_c0 | 0.7391871      | 1.084552       | 0.7539633      | 3.9821398      | 2.2333734      | 2.3969274      | 0.0027121 | 1.794594  | up        | -                                                                                                      |
| c26792.graph_c0 | 1.0804157      | 0.9755141      | 0.6741727      | 2.9806906      | 4.0111073      | 3.1539682      | 8.268E-06 | 1.93274   | up        | PREDICTED: uncharacterized protein LOC105170174 [Sesamum indicum]                                      |
| c26803.graph_c0 | 14.374274      | 14.557416      | 14.457032      | 36.832037      | 34.253916      | 33.439985      | 6.824E-18 | 1.312285  | up        | PREDICTED: probable sodium-coupled neutral amino acid transporter 6 [Sesamum indicum]                  |
| c26804.graph_c0 | 2.4385453      | 2.3176608      | 1.780377       | 0.3524865      | 0.7181091      | 0.3618928      | 1.445E-07 | -2.156156 | down      | PREDICTED: NAC domain-containing protein 45 [Sesamum indicum]                                          |
| c26806.graph_c0 | 4.2701054      | 4.5068915      | 4.2798897      | 1.5817858      | 2.3041015      | 1.7813209      | 0.0001002 | -1.167052 | down      | PREDICTED: uncharacterized protein LOC105179467 isoform X2 [Sesamum indicum]                           |
| c26809.graph_c0 | 1.5165981      | 1.7568966      | 2.428364       | 6.4200898      | 6.8013067      | 7.0358051      | 8.796E-10 | 1.869031  | up        | PREDICTED: aluminum-activated malate transporter 2-like [Sesamum indicum]                              |
| c26818.graph_c0 | 29.068774      | 31.757607      | 31.928837      | 9.9340726      | 12.826058      | 12.281497      | 4.731E-20 | -1.366735 | down      | PREDICTED: uncharacterized protein LOC105165319 [Sesamum indicum]                                      |
| c26824.graph_c0 | 65.344814      | 57.14294       | 59.195638      | 117.42127      | 131.75962      | 135.8791       | 8.285E-15 | 1.12327   | up        | PREDICTED: arabinogalactan peptide 22-like [Sesamum indicum]                                           |
| c26839.graph_c0 | 4.5419362      | 4.1952171      | 5.7083736      | 42.881502      | 54.611448      | 67.537949      | 3.926E-23 | 3.549393  | up        | PREDICTED: 36.4 kDa proline-rich protein-like, partial [Cucumis sativus]                               |
| c26851.graph_c0 | 1.6171796      | 1.2831723      | 1.3995815      | 0.248472       | 0.263226       | 0.4421778      | 7.143E-06 | -2.1362   | down      | -                                                                                                      |
| c26854.graph_c0 | 50.082148      | 50.141605      | 48.461306      | 176.01031      | 186.22352      | 221.2976       | 7.98E-42  | 2.012153  | up        | PREDICTED: lipoxygenase homology domain-containing protein 1-like [Sesamum indicum]                    |
| c26856.graph_c0 | 61.394857      | 55.085888      | 50.83135       | 114.94286      | 131.42668      | 133.27681      | 2.024E-14 | 1.221699  | up        | PREDICTED: dof zinc finger protein DOF1.4-like isoform X2 [Sesamum indicum]                            |
| c26866.graph_c0 | 0.9385272      | 1.5951097      | 0.6532084      | 2.0294068      | 2.5947195      | 2.7708984      | 0.0013308 | 1.25286   | up        | PREDICTED: methylthioribose kinase [Sesamum indicum]                                                   |
| c26871.graph_c0 | 0.6735503      | 0.6797001      | 0.7920872      | 1.2053288      | 1.4897163      | 1.7651469      | 0.0074606 | 1.09238   | up        | PREDICTED: LOW QUALITY PROTEIN: anthranilate synthase alpha subunit 1, chloroplastic [Sesamum indicum] |
| c26872.graph_c0 | 0              | 0.0652477      | 0.1769007      | 1.3740007      | 2.5715373      | 2.4044026      | 2.12E-13  | 4.741899  | up        | PREDICTED: WAI1-related protein At3g01050-like [Sesamum indicum]                                       |
| c26873.graph_c0 | 12.433454      | 12.364569      | 12.274044      | 3.4165727      | 3.6194445      | 2.5987489      | 3.114E-11 | -1.90036  | down      | hypothetical protein MIMGU_mgv1a015234mg [Erythranthe guttata]                                         |
| c26875.graph_c0 | 6.9339381      | 7.8732995      | 12.516263      | 73.64349       | 61.651255      | 85.019902      | 1.01E-26  | 3.05308   | up        | PREDICTED: histone H2A [Nicotiana glauca]                                                              |
| c26877.graph_c0 | 0.3488699      | 0.4199957      | 0.512415       | 1.4445797      | 0.9057215      | 0.996824       | 0.001264  | 1.435898  | up        | PREDICTED: short-chain dehydrogenase TIC 32, chloroplastic [Sesamum indicum]                           |
| c26878.graph_c0 | 7.7148241      | 7.0501963      | 8.8896327      | 18.076532      | 24.549537      | 24.68031       | 1.183E-12 | 1.544605  | up        | PREDICTED: probable receptor-like protein kinase At1g80640 isoform X1 [Sesamum indicum]                |
| c26889.graph_c0 | 8.8210575      | 8.7683536      | 8.3205208      | 0.4103244      | 0.9780501      | 1.0040365      | 5.643E-14 | -3.409161 | down      | PREDICTED: premnaspirodien oxygenase-like [Sesamum indicum]                                            |

| #ID             | 28 h-1<br>FPKM | 28 h-2<br>FPKM | 28 h-3<br>FPKM | 48 h-1<br>FPKM | 48 h-2<br>FPKM | 48 h-3<br>FPKM | FDR       | log2FC    | regulated | nr_annotation                                                                     |
|-----------------|----------------|----------------|----------------|----------------|----------------|----------------|-----------|-----------|-----------|-----------------------------------------------------------------------------------|
| c26894.graph_c0 | 0.6724567      | 0.7939854      | 0.50651        | 6.5568335      | 6.251553       | 8.6346619      | 6.375E-18 | 3.482917  | up        | hypothetical protein MIMGU_mgv1a008083mg [Erythranthe guttata]                    |
| c26902.graph_c0 | 0.3639131      | 0.219053       | 0.0494917      | 3.3058881      | 4.2352036      | 2.8047426      | 9.073E-16 | 4.073808  | up        | hypothetical protein MIMGU_mgv1a014026mg [Erythranthe guttata]                    |
| c26913.graph_c0 | 4.4765552      | 5.1175791      | 4.0947074      | 0.5948929      | 0.7756516      | 0.57005        | 9.561E-12 | -2.778699 | down      | -                                                                                 |
| c26916.graph_c0 | 7.3384487      | 6.7278685      | 7.8766733      | 2.3612831      | 2.6530987      | 1.5280404      | 3.932E-06 | -1.702171 | down      | hypothetical protein MIMGU_mgv1a026902mg, partial [Erythranthe guttata]           |
| c26922.graph_c0 | 36.824366      | 47.323188      | 42.594534      | 8.1295466      | 9.1255829      | 9.8204798      | 2.869E-31 | -2.187375 | down      | PREDICTED: uncharacterized protein LOC105157862 isoform X2 [Sesamum indicum]      |
| c26928.graph_c0 | 2.946645       | 3.0406219      | 3.6311925      | 0.9147158      | 0.6460203      | 0.4069543      | 7.036E-07 | -2.23628  | down      | PREDICTED: probable protein phosphatase 2C 51 [Sesamum indicum]                   |
| c26934.graph_c0 | 20.920833      | 20.864367      | 22.296059      | 61.033182      | 52.483473      | 60.313258      | 5.049E-24 | 1.483477  | up        | PREDICTED: BAG family molecular chaperone regulator 7 [Sesamum indicum]           |
| c26940.graph_c0 | 44.385753      | 49.01547       | 44.993132      | 15.933909      | 20.166425      | 20.325834      | 7.286E-16 | -1.256597 | down      | PREDICTED: DELLA protein GAI-like [Sesamum indicum]                               |
| c26940.graph_c1 | 16.319944      | 16.785519      | 16.790925      | 7.7350384      | 8.7660331      | 5.7621689      | 0.0023798 | -1.121384 | down      | DELLA protein GAIP-B, putative [Ricinus communis]                                 |
| c26940.graph_c2 | 47.37827       | 51.364799      | 47.402086      | 19.171267      | 22.540615      | 23.649254      | 5.493E-11 | -1.122126 | down      | PREDICTED: LOW QUALITY PROTEIN: DELLA protein GAI [Sesamum indicum]               |
| c26943.graph_c0 | 0.0760249      | 0.0686434      | 0.0930535      | 3.2282999      | 4.6961088      | 5.3163091      | 1.748E-27 | 5.833378  | up        | PREDICTED: dirigent protein 24-like [Sesamum indicum]                             |
| c26946.graph_c1 | 1.6046035      | 1.7897022      | 1.412037       | 3.6292105      | 9.2526501      | 8.9425376      | 0.0008165 | 2.210476  | up        | PREDICTED: protein NK11/PLK FAMILY 2.10-like [Sesamum indicum]                    |
| c26947.graph_c0 | 98.983739      | 116.01015      | 108.48307      | 12.669613      | 14.382646      | 16.826952      | 3.016E-79 | -2.843574 | down      | hypothetical protein OsJ_02873 [Oryza sativa Japonica Group]                      |
| c26952.graph_c0 | 4.9996988      | 5.5744262      | 4.9142002      | 10.514466      | 14.546563      | 15.379247      | 6.895E-09 | 1.4205    | up        | hypothetical protein MIMGU_mgv1a006305mg [Erythranthe guttata]                    |
| c26954.graph_c0 | 2.597932       | 2.7478072      | 1.4839239      | 1.0820088      | 0.5482099      | 0.5860308      | 0.0016492 | -1.566829 | down      | PREDICTED: protein NRT1/ PTR FAMILY 4.4 [Sesamum indicum]                         |
| c26957.graph_c0 | 0.3316144      | 0.4790667      | 0.2705946      | 4.5397329      | 1.870282       | 4.413448       | 4.745E-05 | 3.374954  | up        | PREDICTED: heat shock factor-binding protein 1 [Sesamum indicum]                  |
| c26958.graph_c0 | 15.534437      | 14.94242       | 15.542399      | 8.1138969      | 6.2895292      | 6.0751106      | 0.0003374 | -1.120503 | down      | -                                                                                 |
| c26965.graph_c0 | 25.150027      | 24.998458      | 24.966825      | 6.8295435      | 11.697582      | 14.083296      | 8.194E-11 | -1.172417 | down      | PREDICTED: ethylene-responsive transcription factor ERF118-like [Sesamum indicum] |
| c26968.graph_c0 | 54.60763       | 59.748304      | 55.788822      | 115.93751      | 124.09959      | 125.69977      | 2.244E-15 | 1.144857  | up        | PREDICTED: V-type proton ATPase subunit E [Sesamum indicum]                       |
| c26975.graph_c0 | 6.6360705      | 7.2633105      | 6.4770814      | 2.3260672      | 2.8080261      | 4.0191086      | 2.766E-05 | -1.118791 | down      | PREDICTED: uncharacterized protein LOC105173652 [Sesamum indicum]                 |
| c26976.graph_c0 | 3.0246359      | 3.4781128      | 2.7009158      | 11.86354       | 14.292248      | 16.92839       | 2.341E-22 | 2.264501  | up        | PREDICTED: 12-oxophytodienoate reductase 3 [Sesamum indicum]                      |
| c26985.graph_c0 | 56.285353      | 54.161529      | 52.205798      | 174.47635      | 237.04452      | 296.24527      | 9.032E-10 | 2.156258  | up        | hypothetical protein MIMGU_mgv1a004588mg [Erythranthe guttata]                    |
| c26987.graph_c0 | 66.893128      | 64.694969      | 61.662022      | 31.401263      | 27.736633      | 25.390214      | 2.853E-15 | -1.147452 | down      | PREDICTED: F-box protein At1g67340 [Sesamum indicum]                              |
| c26996.graph_c0 | 9.8176784      | 10.773708      | 8.8492345      | 24.582932      | 36.832886      | 41.32843       | 1.773E-08 | 1.837418  | up        | PREDICTED: uncharacterized protein LOC105176754 [Sesamum indicum]                 |
| c27021.graph_c0 | 0.0992836      | 0.1255014      | 0.1458264      | 0.9816248      | 1.6265297      | 1.8364717      | 1.204E-11 | 3.616053  | up        | PREDICTED: uncharacterized protein LOC105169555 [Sesamum indicum]                 |
| c27023.graph_c0 | 12.414545      | 13.321043      | 12.736116      | 92.593597      | 90.420725      | 107.90756      | 2.718E-83 | 2.959859  | up        | PREDICTED: UPF0483 protein C25G4.2-like [Sesamum indicum]                         |
| c27031.graph_c0 | 17.157003      | 13.713491      | 15.319644      | 54.993325      | 101.97644      | 107.06513      | 1.865E-07 | 2.545969  | up        | PREDICTED: uncharacterized protein LOC104093193 [Nicotiana tomentosiformis]       |

| #ID             | 28 h-1<br>FPKM | 28 h-2<br>FPKM | 28 h-3<br>FPKM | 48 h-1<br>FPKM | 48 h-2<br>FPKM | 48 h-3<br>FPKM | FDR       | log2FC    | regulated | nr_annotation                                                                                      |
|-----------------|----------------|----------------|----------------|----------------|----------------|----------------|-----------|-----------|-----------|----------------------------------------------------------------------------------------------------|
| c27045.graph_c0 | 2.4528703      | 1.4925232      | 1.740454       | 10.679404      | 11.814767      | 13.291429      | 1.074E-16 | 2.692958  | up        | hypothetical protein MIMGU_mgv1a002613mg [Erythranthe guttata]                                     |
| c27045.graph_c1 | 2.2948353      | 2.2662731      | 1.7847903      | 10.817371      | 11.893042      | 12.375297      | 2.036E-19 | 2.507347  | up        | PREDICTED: cysteine-rich receptor-like protein kinase 2 [Sesamum indicum]                          |
| c27050.graph_c0 | 8.1422081      | 8.7985179      | 10.531408      | 30.358666      | 29.078956      | 35.952147      | 4.822E-23 | 1.8366    | up        | hypothetical protein MIMGU_mgv1a016029mg [Erythranthe guttata]                                     |
| c27052.graph_c0 | 28.652185      | 27.173523      | 45.199272      | 5.0315656      | 3.2466577      | 4.3142547      | 1.3E-08   | -2.956659 | down      | PREDICTED: L-idonate 5-dehydrogenase-like [Cucumis sativus]                                        |
| c27054.graph_c0 | 1.6649895      | 1.5033294      | 1.4979632      | 6.2232597      | 7.452718       | 5.8744793      | 4.05E-09  | 2.10738   | up        | PREDICTED: uncharacterized protein LOC105156067 [Sesamum indicum]                                  |
| c27063.graph_c0 | 7.6427087      | 7.4091183      | 6.4825611      | 16.239638      | 14.476146      | 15.538781      | 3.278E-11 | 1.146986  | up        | PREDICTED: uncharacterized protein LOC105165907 [Sesamum indicum]                                  |
| c27064.graph_c0 | 7.5970081      | 8.7401854      | 7.698878       | 2.3297824      | 3.9489951      | 5.4589695      | 0.0078319 | -1.003257 | down      | PREDICTED: gibberellin 3-beta-dioxygenase 1-like [Cicer arietinum]                                 |
| c27077.graph_c0 | 9.4000546      | 10.290174      | 8.5490734      | 31.650802      | 27.324241      | 30.895462      | 7.29E-29  | 1.714416  | up        | PREDICTED: LOW QUALITY PROTEIN: 4-coumarate--CoA ligase-like 7 [Sesamum indicum]                   |
| c27079.graph_c0 | 213.1842       | 204.3606       | 212.11969      | 968.37448      | 757.49496      | 940.22497      | 1.722E-20 | 2.127067  | up        | hypothetical protein MIMGU_mgv1a008423mg [Erythranthe guttata]                                     |
| c27083.graph_c0 | 0.4936851      | 0.5571892      | 0.3021323      | 9.152065       | 11.684324      | 10.161915      | 4.496E-27 | 4.557473  | up        | MYB117 [Jatropha curcas]                                                                           |
| c27086.graph_c0 | 3.2398153      | 3.1690203      | 2.2030524      | 70.099166      | 98.914714      | 96.428194      | 3.463E-62 | 4.982441  | up        | PREDICTED: flavonoid 3',5'-methyltransferase-like [Sesamum indicum]                                |
| c27087.graph_c0 | 6.6361784      | 6.8412658      | 6.1412258      | 23.720758      | 26.153557      | 29.279655      | 4.097E-35 | 2.051908  | up        | PREDICTED: 3-ketoacyl-CoA thioase 2, peroxisomal [Sesamum indicum]                                 |
| c27089.graph_c0 | 2.2170664      | 2.755907       | 2.5154037      | 3.5994874      | 6.1582491      | 6.6453865      | 0.0011633 | 1.163472  | up        | PREDICTED: high affinity nitrate transporter 2.5 [Sesamum indicum]                                 |
| c27091.graph_c0 | 24.226534      | 23.645703      | 25.299025      | 2.8259738      | 3.792117       | 2.6821702      | 5.888E-49 | -2.936976 | down      | PREDICTED: uncharacterized protein LOC105176468 [Sesamum indicum]                                  |
| c27101.graph_c0 | 0.0600771      | 0.0361626      | 0.0490224      | 0.6092167      | 1.7210433      | 1.0615682      | 9.21E-06  | 4.572608  | up        | PREDICTED: UDP-glucuronate:xylan alpha-glucuronosyltransferase 1-like isoform X1 [Sesamum indicum] |
| c27104.graph_c0 | 5.0831368      | 5.518778       | 5.9290611      | 9.6055817      | 16.541152      | 18.00847       | 0.0001584 | 1.449204  | up        | PREDICTED: protein GLUTAMINE DUMPER 5-LIKE [Sesamum indicum]                                       |
| c27109.graph_c0 | 0.0887445      | 0.060096       | 0.1086222      | 1.293637       | 3.3367517      | 2.952746       | 2.547E-08 | 4.90683   | up        | PREDICTED: root phototropism protein 2-like [Sesamum indicum]                                      |
| c27119.graph_c0 | 18.625535      | 16.897577      | 15.998194      | 2.9370344      | 2.7524204      | 0.9046231      | 4.534E-16 | -2.914787 | down      | -                                                                                                  |
| c27120.graph_c0 | 4.9087268      | 4.9031667      | 5.7082942      | 114.7044       | 62.636479      | 49.667591      | 5.99E-05  | 3.927405  | up        | PREDICTED: aureusidin synthase-like [Sesamum indicum]                                              |
| c27121.graph_c0 | 23.800795      | 25.383348      | 26.458603      | 5.2530007      | 5.1889094      | 4.5477617      | 7.295E-21 | -2.291811 | down      | PREDICTED: uncharacterized protein LOC105159027 [Sesamum indicum]                                  |
| c27133.graph_c0 | 41.562378      | 41.333598      | 35.300924      | 100.97979      | 100.42717      | 85.841264      | 6.626E-19 | 1.324942  | up        | PREDICTED: chaperone protein dnaJ 11, chloroplastic-like [Sesamum indicum]                         |
| c27142.graph_c0 | 17.172915      | 15.787451      | 18.135779      | 5.9007293      | 8.042583       | 8.0677391      | 1.502E-09 | -1.178883 | down      | PREDICTED: LOW QUALITY PROTEIN: uncharacterized protein LOC105176443 [Sesamum indicum]             |
| c27145.graph_c0 | 11.061859      | 9.4129826      | 9.4809526      | 22.091776      | 27.517882      | 25.401678      | 7.403E-13 | 1.362862  | up        | PREDICTED: transmembrane 9 superfamily member 9-like [Sesamum indicum]                             |
| c27158.graph_c0 | 143.56182      | 171.26548      | 175.76402      | 29.087371      | 23.300651      | 27.029235      | 7.602E-50 | -2.581823 | down      | hypothetical protein MIMGU_mgv1a015139mg [Erythranthe guttata]                                     |
| c27166.graph_c0 | 7.0022703      | 7.0096103      | 7.850258       | 2.5855863      | 3.229703       | 3.2277624      | 2.733E-05 | -1.235834 | down      | PREDICTED: probable LRR receptor-like serine/threonine-protein kinase RLK [Sesamum indicum]        |

| #ID             | 28 h-1<br>FPKM | 28 h-2<br>FPKM | 28 h-3<br>FPKM | 48 h-1<br>FPKM | 48 h-2<br>FPKM | 48 h-3<br>FPKM | FDR       | log2FC    | regulated | nr_annotation                                                                  |
|-----------------|----------------|----------------|----------------|----------------|----------------|----------------|-----------|-----------|-----------|--------------------------------------------------------------------------------|
| c27172.graph_c0 | 3.6204053      | 2.7428588      | 3.905005       | 0.4747376      | 1.0058539      | 0.797902       | 6.026E-07 | -2.141955 | down      | PREDICTED: uncharacterized protein LOC105161718 isoform X1 [Sesamum indicum]   |
| c27173.graph_c0 | 15.948683      | 16.94916       | 16.454477      | 6.1810238      | 6.055711       | 5.4584857      | 2.029E-10 | -1.436278 | down      | PREDICTED: uncharacterized protein LOC10517914 [Sesamum indicum]               |
| c27176.graph_c0 | 1.6453853      | 3.1198202      | 1.7454073      | 0.6256941      | 0.3682484      | 0.4330191      | 0.0008554 | -2.137207 | down      | PREDICTED: phospholipase A1-beta2, chloroplastic [Sesamum indicum]             |
| c27180.graph_c0 | 7.7972555      | 8.7675237      | 9.1298281      | 2.8658753      | 1.6737184      | 1.7654113      | 2.98E-12  | -1.974047 | down      | PREDICTED: uncharacterized protein LOC105169888 [Sesamum indicum]              |
| c27197.graph_c0 | 0.5143038      | 0.3572063      | 0.408907       | 2.2064917      | 1.8416749      | 1.8145865      | 6.699E-10 | 2.240748  | up        | PREDICTED: uncharacterized protein LOC105158016 [Sesamum indicum]              |
| c27204.graph_c0 | 16.541039      | 14.067813      | 13.954521      | 29.928681      | 40.698077      | 43.180301      | 2.343E-11 | 1.388646  | up        | PREDICTED: serine/threonine-protein kinase-like protein ACR4 [Sesamum indicum] |
| c27205.graph_c0 | 7.4010121      | 7.4935808      | 7.8544059      | 2.3860025      | 2.9872585      | 2.557311       | 8.681E-06 | -1.481342 | down      | PREDICTED: dnaJ homolog subfamily B member 6 isoform X1 [Sesamum indicum]      |
| c27206.graph_c0 | 0.8288636      | 0.8887085      | 1.0567905      | 2.3639527      | 3.3390949      | 3.6225754      | 2.932E-05 | 1.783859  | up        | PREDICTED: uncharacterized protein LOC105160269 [Sesamum indicum]              |
| c27216.graph_c0 | 7.2474511      | 6.1563088      | 5.3691632      | 38.015924      | 40.849509      | 41.086366      | 4.394E-47 | 2.716658  | up        | PREDICTED: GDSL esterase/lipase CPRD49-like isoform X1 [Sesamum indicum]       |
| c27229.graph_c0 | 0.0317044      | 0.0286261      | 0              | 1.4065681      | 2.5970112      | 2.8606991      | 2.447E-15 | 6.863371  | up        | PREDICTED: probable protein S-acyltransferase 4 [Sesamum indicum]              |
| c27232.graph_c0 | 6.1162937      | 5.1886659      | 4.8537346      | 2.9818664      | 2.5722683      | 2.0088869      | 0.0018121 | -1.047873 | down      | 1-aminocyclopropane-1-carboxylate oxidase-like protein [Medicago truncatula]   |
| c27235.graph_c1 | 5.4301679      | 7.2698654      | 5.1185374      | 18.513267      | 16.972409      | 22.491972      | 2.16E-08  | 1.743951  | up        | PREDICTED: enolase-like [Sesamum indicum]                                      |
| c27247.graph_c0 | 7.5512342      | 9.1866121      | 7.2778929      | 29.214012      | 32.710012      | 30.939739      | 9.196E-40 | 1.991924  | up        | PREDICTED: NADP-dependent malic enzyme-like isoform X1 [Sesamum indicum]       |
| c27249.graph_c0 | 24.145795      | 25.868258      | 24.066247      | 6.6218651      | 8.8102565      | 8.5365797      | 1.65E-23  | -1.590806 | down      | unnamed protein product [Coffea canephora]                                     |
| c27253.graph_c0 | 4.2933429      | 4.1001295      | 3.9075635      | 64.782259      | 91.579177      | 94.98501       | 7.106E-42 | 4.388366  | up        | hypothetical protein MIMGU_mgv1a016583mg [Erythranthe guttata]                 |
| c27254.graph_c1 | 0.6491484      | 0.7256726      | 0.7314902      | 2.3509813      | 1.950954       | 3.2424279      | 3.685E-06 | 1.881502  | up        | PREDICTED: cytochrome P450 81E8-like [Sesamum indicum]                         |
| c27260.graph_c0 | 2.2610911      | 1.4321344      | 2.5610144      | 5.5610886      | 5.8912991      | 5.519172       | 1.047E-05 | 1.480886  | up        | PREDICTED: WAI1-related protein At1g43650-like [Sesamum indicum]               |
| c27266.graph_c0 | 8.8119722      | 11.837548      | 11.458028      | 28.514835      | 38.481541      | 39.755368      | 3.605E-17 | 1.769586  | up        | PREDICTED: palmitoyl-protein thioesterase 1 [Sesamum indicum]                  |
| c27271.graph_c0 | 6.5223822      | 6.29417        | 5.9980469      | 18.897371      | 16.080457      | 11.754768      | 0.0001584 | 1.360765  | up        | PREDICTED: uncharacterized protein LOC105171966 [Sesamum indicum]              |
| c27273.graph_c0 | 35.486298      | 36.349577      | 32.519135      | 82.112145      | 102.32663      | 92.70284       | 4.548E-23 | 1.448023  | up        | unnamed protein product [Coffea canephora]                                     |
| c27274.graph_c1 | 0.3477092      | 0.2092992      | 0.094576       | 11.018677      | 10.894755      | 13.07247       | 4.746E-26 | 5.788407  | up        | TPX2 family protein, putative isoform 1 [Theobroma cacao]                      |
| c27277.graph_c0 | 0.7015061      | 1.1480271      | 0.7334173      | 1.8062092      | 1.6485191      | 2.8434264      | 0.0018527 | 1.32538   | up        | hypothetical protein MIMGU_mgv1a004926mg [Erythranthe guttata]                 |
| c27282.graph_c0 | 198.99404      | 247.77785      | 231.6465       | 26.52375       | 19.682405      | 18.94765       | 1.216E-68 | -3.331512 | down      | hypothetical protein MIMGU_mgv1a005561mg [Erythranthe guttata]                 |
| c27288.graph_c0 | 33.573284      | 35.839523      | 33.825576      | 10.211604      | 17.74985       | 18.062177      | 3.661E-13 | -1.13322  | down      | PREDICTED: pre-rRNA-processing protein esf1 [Sesamum indicum]                  |
| c27289.graph_c0 | 0.7699364      | 0.8606996      | 0.6581791      | 2.1377977      | 2.7570717      | 1.9849039      | 0.0001414 | 1.627914  | up        | hypothetical protein MIMGU_mgv1a007466mg [Erythranthe guttata]                 |
| c27290.graph_c0 | 13.550296      | 13.120721      | 15.030034      | 58.273999      | 49.671224      | 59.514689      | 7.062E-33 | 2.049091  | up        | -                                                                              |
| c27300.graph_c0 | 2.0445431      | 2.4613743      | 2.0608789      | 5.7421925      | 5.1679915      | 5.6067405      | 0.000107  | 1.374489  | up        | PREDICTED: uncharacterized protein LOC105168317 [Sesamum indicum]              |

| #ID             | 28 h-1<br>FPKM | 28 h-2<br>FPKM | 28 h-3<br>FPKM | 48 h-1<br>FPKM | 48 h-2<br>FPKM | 48 h-3<br>FPKM | FDR       | log2FC    | regulated | nr_annotation                                                                                |
|-----------------|----------------|----------------|----------------|----------------|----------------|----------------|-----------|-----------|-----------|----------------------------------------------------------------------------------------------|
| c27319.graph_c0 | 2.7048926      | 4.2464597      | 3.2809288      | 1.2973273      | 1.079855       | 0.7695693      | 4.129E-06 | -1.651981 | down      | hypothetical protein MIMGU_mgv1a003421mg [Erythranthe guttata]                               |
| c27320.graph_c0 | 59.058994      | 62.027994      | 66.201104      | 187.88134      | 133.49638      | 118.29568      | 0.0012677 | 1.281401  | up        | PREDICTED: probable 6-phosphogluconolactonase 4, chloroplastic [Sesamum indicum]             |
| c27324.graph_c0 | 28.145828      | 25.845047      | 26.073135      | 11.285822      | 12.458781      | 10.112445      | 4.21E-15  | -1.199818 | down      | PREDICTED: lysM domain receptor-like kinase 3 [Sesamum indicum]                              |
| c27333.graph_c0 | 1.0002833      | 0.8638941      | 1.1711025      | 6.284536       | 7.5921184      | 8.0445486      | 2.935E-15 | 2.889983  | up        | PREDICTED: transcription factor bHLH118-like [Sesamum indicum]                               |
| c27338.graph_c0 | 14.772522      | 16.524079      | 15.931582      | 6.7387081      | 6.0648587      | 5.4123745      | 1.896E-07 | -1.329135 | down      | PREDICTED: clathrin light chain 2-like [Sesamum indicum]                                     |
| c27348.graph_c0 | 2.5337304      | 2.8436158      | 3.0336264      | 29.11532       | 38.157712      | 40.622674      | 9.036E-50 | 3.71766   | up        | PREDICTED: endoglucanase 25-like [Sesamum indicum]                                           |
| c27359.graph_c0 | 15.990978      | 16.063863      | 16.447456      | 95.308058      | 96.084873      | 101.04879      | 2.158E-70 | 2.633527  | up        | PREDICTED: pectinesterase-like isoform X1 [Sesamum indicum]                                  |
| c27363.graph_c0 | 11.541505      | 14.225351      | 10.538937      | 1.0449791      | 0.6150159      | 0.2066258      | 4.251E-20 | -4.21986  | down      | -                                                                                            |
| c27369.graph_c0 | 2.9017847      | 3.3012498      | 3.9306022      | 1.0299032      | 0.9351922      | 1.6364316      | 0.0010397 | -1.454156 | down      | -                                                                                            |
| c27389.graph_c0 | 0.8794804      | 0.4915785      | 0.9568651      | 27.870156      | 48.421083      | 62.398246      | 1.19E-14  | 5.926398  | up        | PREDICTED: expansin-A18-like [Sesamum indicum]                                               |
| c27390.graph_c1 | 1.3002101      | 2.0218335      | 1.0609608      | 3.6624713      | 3.200954       | 3.910614       | 0.0018074 | 1.341614  | up        | unnamed protein product [Coffea canephora]                                                   |
| c27395.graph_c0 | 4.7569321      | 4.3854861      | 4.3310683      | 22.024499      | 17.078964      | 16.095738      | 8.435E-11 | 2.08246   | up        | PREDICTED: uncharacterized protein LOC100247103 isoform X1 [Vitis vinifera]                  |
| c27396.graph_c0 | 1220.0857      | 1249.2786      | 1362.2089      | 369.80582      | 397.56581      | 407.87418      | 4.429E-27 | -1.664617 | down      | PREDICTED: abscisic acid 8'-hydroxylase 2 isoform X2 [Sesamum indicum]                       |
| c27410.graph_c0 | 0.669878       | 0.3316848      | 0.4231858      | 10.381174      | 9.0244116      | 13.087931      | 2.626E-34 | 4.552506  | up        | PREDICTED: transcription factor MYC2 [Sesamum indicum]                                       |
| c27414.graph_c0 | 9.1774581      | 9.5667876      | 7.1612354      | 16.991794      | 16.132404      | 18.197355      | 1.732E-08 | 1.028874  | up        | PREDICTED: LOW QUALITY PROTEIN: BAG family molecular chaperone regulator 2 [Sesamum indicum] |
| c27415.graph_c0 | 0.390767       | 0.291465       | 0.4713623      | 3.747249       | 6.9128508      | 9.3129879      | 1.089E-07 | 4.142651  | up        | PREDICTED: uncharacterized protein LOC105161921 [Sesamum indicum]                            |
| c27432.graph_c0 | 3.8922947      | 9.957402       | 6.9873775      | 26.313441      | 29.44392       | 30.29127       | 4.315E-11 | 2.086355  | up        | hypothetical protein MIMGU_mgv1a022192mg, partial [Erythranthe guttata]                      |
| c27437.graph_c0 | 7.1562333      | 6.8612994      | 6.6002654      | 24.494797      | 26.950928      | 29.866691      | 2.756E-36 | 2.019075  | up        | hypothetical protein PHAVU_010G112100g [Phaseolus vulgaris]                                  |
| c27451.graph_c0 | 3.0586196      | 1.9247841      | 2.2689169      | 12.101019      | 10.952636      | 8.1539642      | 3.98E-08  | 2.151838  | up        | PREDICTED: cyclic dof factor 1 [Sesamum indicum]                                             |
| c27459.graph_c0 | 2.1900865      | 2.1100087      | 1.9767841      | 3.5670506      | 4.0910241      | 4.7057113      | 2.79E-05  | 1.016451  | up        | PREDICTED: filament-like plant protein / isoform X2 [Sesamum indicum]                        |
| c27462.graph_c0 | 35.277661      | 37.431938      | 35.316326      | 93.755713      | 72.902434      | 70.818986      | 4.501E-06 | 1.184071  | up        | PREDICTED: oxalate--CoA ligase [Sesamum indicum]                                             |
| c27464.graph_c0 | 2.8507493      | 3.6151114      | 3.5023506      | 37.556399      | 51.743893      | 53.648568      | 1.673E-42 | 3.877948  | up        | PREDICTED: fasciclin-like arabinogalactan protein 2 [Sesamum indicum]                        |
| c27468.graph_c0 | 8.6899358      | 7.9359707      | 8.3241196      | 2.369388       | 3.6850101      | 4.6651019      | 4.99E-07  | -1.18641  | down      | PREDICTED: probable folate-biopterin transporter 9, chloroplastic [Sesamum indicum]          |
| c27479.graph_c0 | 1.3833147      | 1.099123       | 1.2190754      | 2.7353871      | 3.343628       | 3.1204243      | 0.0015859 | 1.352138  | up        | PREDICTED: putative F-box protein At5g62060 [Sesamum indicum]                                |
| c27483.graph_c0 | 0.6612876      | 0.6965941      | 1.0342434      | 4.6801215      | 5.1060218      | 5.6560492      | 1.038E-10 | 2.729359  | up        | PREDICTED: uncharacterized protein LOC105176460 isoform X2 [Sesamum indicum]                 |
| c27490.graph_c0 | 10.558493      | 11.862081      | 10.040623      | 0.8513783      | 2.0564052      | 2.5453724      | 2.203E-21 | -2.546646 | down      | PREDICTED: cytochrome P450 76A1 [Sesamum indicum]                                            |



| #ID             | 28 h-1<br>FPKM | 28 h-2<br>FPKM | 28 h-3<br>FPKM | 48 h-1<br>FPKM | 48 h-2<br>FPKM | 48 h-3<br>FPKM | FDR       | log2FC    | regulated | nr_annotation                                                                                     |
|-----------------|----------------|----------------|----------------|----------------|----------------|----------------|-----------|-----------|-----------|---------------------------------------------------------------------------------------------------|
| c27492.graph_c0 | 0.6853397      | 0.5862292      | 0.6475314      | 6.2639184      | 5.8124339      | 6.2652111      | 2.115E-18 | 3.29943   | up        | PREDICTED: heat stress transcription factor A-66-like [Sesamum indicum]                           |
| c27503.graph_c0 | 1.3333014      | 1.1543731      | 0.8047946      | 0.0926059      | 0.2207356      | 0.1442003      | 3.367E-09 | -2.816806 | down      | hypothetical protein MIMGU_mgv1a026570mg, partial [Erythranthe guttata]                           |
| c27505.graph_c0 | 2.6512064      | 3.6398736      | 3.3191319      | 124.34218      | 133.62745      | 113.42435      | 7.83E-189 | 5.314442  | up        | plasma membrane intrinsic protein [Olea europaea]                                                 |
| c27518.graph_c0 | 3.3128889      | 3.113319       | 2.2619368      | 25.110283      | 27.690773      | 30.959896      | 1.277E-34 | 3.308974  | up        | hypothetical protein MIMGU_mgv1a013970mg [Erythranthe guttata]                                    |
| c27527.graph_c0 | 3.8385677      | 3.496812       | 3.7475013      | 10.252656      | 11.045538      | 9.934522       | 1.017E-08 | 1.536178  | up        | hypothetical protein MIMGU_mgv1a009219mg [Erythranthe guttata]                                    |
| c27530.graph_c0 | 10.342059      | 11.611324      | 10.748309      | 20.547608      | 22.522163      | 22.9302        | 2.316E-11 | 1.053428  | up        | hypothetical protein MIMGU_mgv1a003692mg [Erythranthe guttata]                                    |
| c27533.graph_c0 | 0              | 0              | 0.0340204      | 3.4879533      | 3.583092       | 1.9749926      | 4.832E-16 | 8.095699  | up        | PREDICTED: probable trehalose-phosphate phosphatase J [Sesamum indicum]                           |
| c27535.graph_c0 | 24.883741      | 19.937812      | 22.155781      | 75.937515      | 60.648487      | 40.556296      | 0.002416  | 1.453197  | up        | -                                                                                                 |
| c27536.graph_c0 | 0.4371752      | 0.3947282      | 0.4459143      | 1.3392001      | 1.4676415      | 2.0134138      | 7.375E-06 | 1.952853  | up        | PREDICTED: protein IQ-DOMAIN 1 [Sesamum indicum]                                                  |
| c27542.graph_c0 | 4.1177365      | 3.4333945      | 3.8229019      | 1.251623       | 2.0594431      | 1.9667232      | 0.0011254 | -1.074397 | down      | PREDICTED: pentatricopeptide repeat-containing protein At5g15010, mitochondrial [Sesamum indicum] |
| c27548.graph_c0 | 14.635851      | 17.619735      | 15.995591      | 5.0291618      | 7.3405067      | 9.016131       | 2.87E-08  | -1.140082 | down      | PREDICTED: mitochondrial substrate carrier family protein B-like [Sesamum indicum]                |
| c27550.graph_c0 | 0.0551023      | 0.0497522      | 0.044963       | 3.3526176      | 5.6975056      | 6.5256164      | 6.852E-18 | 6.73193   | up        | PREDICTED: galactose oxidase-like [Sesamum indicum]                                               |
| c27557.graph_c1 | 3.4334765      | 2.8094723      | 2.8892416      | 5.5762362      | 9.6534681      | 8.8342489      | 0.0004522 | 1.430769  | up        | PREDICTED: uncharacterized protein At5g65660 [Sesamum indicum]                                    |
| c27558.graph_c0 | 3.13504        | 3.4294379      | 3.4436864      | 7.7185251      | 15.098821      | 17.271742      | 0.0001615 | 2.031782  | up        | PREDICTED: D-amino-acid transaminase, chloroplastic-like [Sesamum indicum]                        |
| c27563.graph_c0 | 0.0735182      | 0              | 0.0299951      | 1.7240091      | 1.1353164      | 1.3681737      | 1.085E-16 | 5.399641  | up        | PREDICTED: uncharacterized protein LOC105158131 isoform X1 [Sesamum indicum]                      |
| c27571.graph_c0 | 5.3402092      | 4.8217082      | 4.122023       | 0.3658978      | 0.7752486      | 0.8139341      | 1.51E-08  | -2.839672 | down      | -                                                                                                 |
| c27575.graph_c0 | 3.6839394      | 3.0431666      | 4.7329526      | 0.1987091      | 0              | 0.0884051      | 1.674E-16 | -5.244759 | down      | -                                                                                                 |
| c27584.graph_c0 | 3.5340899      | 3.0705385      | 3.3734884      | 7.0154093      | 9.8496061      | 8.8745512      | 0.0001033 | 1.403592  | up        | PREDICTED: uncharacterized protein LOC105159891 [Sesamum indicum]                                 |
| c27587.graph_c0 | 4.3490324      | 5.6340591      | 4.4436834      | 46.402712      | 58.654488      | 45.170348      | 9.854E-48 | 3.420352  | up        | Tubulin beta-7 chain [Gossypium arboreum]                                                         |
| c27592.graph_c0 | 0.871397       | 0.7867898      | 1.1293192      | 7.7968935      | 9.223514       | 11.100206      | 8.04E-20  | 3.371354  | up        | PREDICTED: transcription factor MYB44-like [Sesamum indicum]                                      |
| c27593.graph_c0 | 0.5146497      | 0.8983822      | 0.67192        | 6.6975261      | 5.2292669      | 5.669187       | 2.938E-26 | 3.124088  | up        | PREDICTED: wall-associated receptor kinase 2-like [Sesamum indicum]                               |
| c27597.graph_c0 | 2.9678952      | 3.966002       | 3.5842318      | 9.6307858      | 8.7679021      | 12.452432      | 6.7E-05   | 1.593302  | up        | PREDICTED: uncharacterized protein LOC105165182 [Sesamum indicum]                                 |
| c27601.graph_c0 | 44.86984       | 48.814748      | 46.676499      | 114.37973      | 126.34656      | 139.28003      | 1.017E-24 | 1.476339  | up        | PREDICTED: protein SPIRAL1-like 1-like [Oryza brachyantha]                                        |
| c27602.graph_c0 | 12.618497      | 13.341946      | 13.818691      | 2.1687965      | 2.1670328      | 2.4341569      | 8.375E-34 | -2.513721 | down      | hypothetical protein MIMGU_mgv1a002239mg [Erythranthe guttata]                                    |
| c27606.graph_c0 | 0.1133648      | 0.2456586      | 0.333017       | 4.7707802      | 5.6325403      | 5.1400441      | 2.892E-32 | 4.528248  | up        | PREDICTED: rop guanine nucleotide exchange factor 3 [Sesamum indicum]                             |
| c27608.graph_c0 | 37.143629      | 35.364915      | 39.065244      | 13.756807      | 14.40992       | 12.735855      | 5.879E-21 | -1.405644 | down      | PREDICTED: selenoprotein O [Sesamum indicum]                                                      |
| c27610.graph_c0 | 0.5178041      | 0.4921353      | 0.3780477      | 1.2781647      | 2.8911023      | 3.2582202      | 0.0002558 | 2.448227  | up        | PREDICTED: lecithin-cholesterol acyltransferase-like 1 [Sesamum indicum]                          |

| #ID             | 28 h-1<br>FPKM | 28 h-2<br>FPKM | 28 h-3<br>FPKM | 48 h-1<br>FPKM | 48 h-2<br>FPKM | 48 h-3<br>FPKM | FDR       | log2FC    | regulated | nr_annotation                                                                      |
|-----------------|----------------|----------------|----------------|----------------|----------------|----------------|-----------|-----------|-----------|------------------------------------------------------------------------------------|
| c27614.graph_c0 | 19.404046      | 18.980037      | 21.663165      | 7.8632849      | 9.7514626      | 10.677434      | 1.465E-08 | -1.048595 | down      | PREDICTED: uncharacterized protein LOC105165129 [Sesamum indicum]                  |
| c27618.graph_c0 | 11.293354      | 11.667082      | 10.544         | 1.531389       | 2.3276779      | 4.0878622      | 8.956E-10 | -2.045301 | down      | -                                                                                  |
| c27634.graph_c0 | 0.3128004      | 0.3177331      | 0.6700118      | 1.5859903      | 1.522649       | 1.8522061      | 1.045E-05 | 1.971245  | up        | PREDICTED: uncharacterized protein LOC105170116 [Sesamum indicum]                  |
| c27637.graph_c0 | 9.3315747      | 9.0082831      | 8.0753079      | 1.8748277      | 2.8889492      | 2.4568189      | 1.578E-11 | -1.835641 | down      | -                                                                                  |
| c27651.graph_c0 | 0.8253892      | 1.4331713      | 0.8289364      | 2.1327233      | 2.472509       | 2.2199326      | 0.0044753 | 1.185512  | up        | PREDICTED: serine/threonine-protein kinase D6PKL1-like [Sesamum indicum]           |
| c27654.graph_c0 | 1.0241679      | 0.4498675      | 0.9260599      | 2.1753759      | 3.6798412      | 4.3707919      | 1.535E-05 | 2.121773  | up        | cytochrome P450 [Verbena x hybrida]                                                |
| c27656.graph_c0 | 1.0122672      | 1.2827822      | 1.0288793      | 4.1870335      | 4.3641115      | 3.8057176      | 2.818E-10 | 1.937179  | up        | PREDICTED: LOW QUALITY PROTEIN: uncharacterized protein ycf45 [Sesamum indicum]    |
| c27662.graph_c0 | 1.0529686      | 1.1831331      | 1.0883375      | 3.8855045      | 3.8020055      | 3.1933826      | 5.678E-07 | 1.754792  | up        | PREDICTED: MATE efflux family protein 5-like [Sesamum indicum]                     |
| c27665.graph_c0 | 2.7865897      | 3.1450365      | 3.2130269      | 5.3367051      | 5.9383052      | 7.3449074      | 0.000413  | 1.064056  | up        | PREDICTED: IAA-amino acid hydrolase ILK1-like 2 [Sesamum indicum]                  |
| c27670.graph_c1 | 45.765674      | 49.327085      | 51.856125      | 18.855914      | 19.128534      | 22.311219      | 7.508E-18 | -1.244781 | down      | hypothetical protein MIMGU_mgv1a001800mg [Erythranthe guttata]                     |
| c27688.graph_c0 | 9.4048425      | 8.2564641      | 6.9302315      | 20.111054      | 33.3397        | 35.231098      | 3.421E-07 | 1.883487  | up        | PREDICTED: allene oxide cyclase 4, chloroplastic-like [Pyrus x bretschneideri]     |
| c27699.graph_c0 | 7.0859456      | 7.0164462      | 7.2115563      | 2.7330205      | 3.8302456      | 3.7110666      | 9.16E-08  | -1.016702 | down      | PREDICTED: uncharacterized protein LOC105161282 isoform X2 [Sesamum indicum]       |
| c27705.graph_c0 | 3.2558168      | 3.3698969      | 5.3782379      | 13.991495      | 16.848361      | 23.734749      | 5.966E-08 | 2.219605  | up        | hypothetical protein MIMGU_mgv1a024655mg [Erythranthe guttata]                     |
| c27724.graph_c0 | 10.753314      | 10.402751      | 12.260959      | 22.697412      | 27.719616      | 26.422675      | 9.289E-10 | 1.239685  | up        | PREDICTED: pollen-specific protein SF21-like [Nicotiana glauca]                    |
| c27729.graph_c0 | 0.4098086      | 0.3700187      | 0.3715561      | 5.6563702      | 4.0355891      | 4.3653608      | 1.926E-16 | 3.658245  | up        | PREDICTED: psbP-like protein 2, chloroplastic [Sesamum indicum]                    |
| c27731.graph_c0 | 1.0296407      | 1.2595515      | 1.0298961      | 0.2526088      | 0.0892028      | 0.1123849      | 1.158E-08 | -2.807052 | down      | hypothetical protein MIMGU_mgv1a025181mg, partial [Erythranthe guttata]            |
| c27738.graph_c0 | 0.4138195      | 0.7161437      | 0.253255       | 2.5353089      | 3.936163       | 5.0563335      | 1.886E-08 | 3.093052  | up        | PREDICTED: protein CHUP1, chloroplastic isoform X1 [Sesamum indicum]               |
| c27745.graph_c0 | 0.4163635      | 0.5639058      | 0.5096238      | 1.3722056      | 1.7891513      | 1.3618626      | 0.0002422 | 1.641413  | up        | PREDICTED: equilibrative nucleotide transporter 1 [Sesamum indicum]                |
| c27754.graph_c0 | 84.145254      | 95.214076      | 90.443058      | 36.012003      | 36.619171      | 37.311498      | 3.987E-17 | -1.253424 | down      | PREDICTED: topless-related protein 4 [Sesamum indicum]                             |
| c27760.graph_c0 | 8.3832855      | 8.3803194      | 9.6258316      | 1.8975771      | 5.3070675      | 2.5664481      | 5.707E-05 | -1.404956 | down      | PREDICTED: uncharacterized protein LOC105179512 [Sesamum indicum]                  |
| c27771.graph_c0 | 0.5634678      | 0.5489238      | 0.5928808      | 2.199098       | 2.2500306      | 2.7093381      | 1.551E-09 | 2.109574  | up        | PREDICTED: uncharacterized protein LOC105176570 isoform X1 [Sesamum indicum]       |
| c27778.graph_c0 | 1.171358       | 0.9325308      | 0.9763738      | 2.7460494      | 3.7040365      | 2.6280952      | 6.63E-08  | 1.598258  | up        | PREDICTED: phosphoenolpyruvate carboxylase 4 [Sesamum indicum]                     |
| c27786.graph_c1 | 1.7645386      | 1.5078622      | 1.3370027      | 0.3195261      | 0.211562       | 0.6041638      | 2.338E-05 | -1.98254  | down      | PREDICTED: pentatricopeptide repeat-containing protein At1g33350 [Sesamum indicum] |
| c27795.graph_c0 | 1.6557333      | 2.0149621      | 1.9972263      | 3.9237759      | 3.866758       | 6.1707621      | 0.0012162 | 1.338635  | up        | PREDICTED: exonuclease DPD1, chloroplastic/mitochondrial [Sesamum indicum]         |
| c27795.graph_c1 | 3.7633532      | 2.8482859      | 3.4773036      | 6.5942761      | 7.6546926      | 7.240803       | 0.0015848 | 1.1303    | up        | PREDICTED: exonuclease DPD1, chloroplastic/mitochondrial [Sesamum indicum]         |

| #ID             | 28 h-1<br>FPKM | 28 h-2<br>FPKM | 28 h-3<br>FPKM | 48 h-1<br>FPKM | 48 h-2<br>FPKM | 48 h-3<br>FPKM | FDR       | log2FC    | regulated | nr_annotation                                                                                       |
|-----------------|----------------|----------------|----------------|----------------|----------------|----------------|-----------|-----------|-----------|-----------------------------------------------------------------------------------------------------|
| c27796.graph_c0 | 19.543537      | 15.674888      | 15.86254       | 52.510584      | 48.718645      | 54.110269      | 6.342E-24 | 1.647266  | up        | unnamed protein product [Coffea canephora]                                                          |
| c27800.graph_c0 | 0.1848976      | 0.2225936      | 0.1005833      | 2.9687033      | 2.4001172      | 4.8659843      | 1.853E-08 | 4.372704  | up        | PREDICTED: transcription factor bHLH130-like [Sesamum indicum]                                      |
| c27801.graph_c0 | 6.8039252      | 7.0406434      | 6.362906       | 18.993229      | 23.679843      | 24.25791       | 1.012E-24 | 1.765714  | up        | PREDICTED: chorismate mutase 1, chloroplast-like [Sesamum indicum]                                  |
| c27807.graph_c0 | 39.499081      | 37.534863      | 39.099814      | 114.58184      | 142.94976      | 178.639        | 9.152E-12 | 1.945194  | up        | hypothetical protein MIMGU_mgv1a0223741mg, partial [Erythranthe guttata]                            |
| c27825.graph_c0 | 59.733574      | 61.124992      | 58.979698      | 141.88062      | 153.81282      | 178.93495      | 8.696E-24 | 1.439434  | up        | PREDICTED: 2-Cys peroxiredoxin BAS1, chloroplast-like [Sesamum indicum]                             |
| c27828.graph_c0 | 81.903989      | 85.901651      | 86.202031      | 27.656791      | 32.067935      | 33.911531      | 3.785E-21 | -1.40091  | down      | hypothetical protein MIMGU_mgv1a024518mg [Erythranthe guttata]                                      |
| c27837.graph_c0 | 2.3619897      | 3.1054453      | 2.7388861      | 5.0950457      | 4.8967764      | 5.9824046      | 0.0049954 | 1.002252  | up        | PREDICTED: uncharacterized FCP1 homology domain-containing protein C1271.03c-like [Sesamum indicum] |
| c27846.graph_c0 | 4.1161336      | 4.1259257      | 5.6358375      | 32.27777       | 33.210709      | 22.58302       | 5.822E-14 | 2.709962  | up        | PREDICTED: lignin-forming anionic peroxidase-like [Sesamum indicum]                                 |
| c27854.graph_c0 | 4.4535844      | 4.6319797      | 4.2781042      | 0.5002117      | 1.2112312      | 0.8265871      | 6.767E-08 | -2.367002 | down      | PREDICTED: hexose carrier protein HEX6-like [Sesamum indicum]                                       |
| c27870.graph_c0 | 77.279063      | 75.396011      | 91.310351      | 608.4725       | 514.68796      | 562.50003      | 6.083E-49 | 2.832816  | up        | PREDICTED: asparagine synthetase [glutamine-hydrolyzing] [Solanum lycopersicum]                     |
| c27881.graph_c0 | 20.306272      | 24.094664      | 29.693582      | 94.644632      | 76.857393      | 57.460247      | 5.99E-05  | 1.676189  | up        | PREDICTED: serine carboxypeptidase-like 50 [Sesamum indicum]                                        |
| c27892.graph_c0 | 2.0913478      | 2.4032794      | 1.085969       | 10.60375       | 11.658894      | 10.793243      | 1.329E-13 | 2.608544  | up        | PREDICTED: transcription factor MYB86-like [Sesamum indicum]                                        |
| c27892.graph_c1 | 1.3417285      | 1.0297368      | 1.1495815      | 5.697478       | 8.0176873      | 8.3988591      | 2.593E-11 | 2.686201  | up        | -                                                                                                   |
| c27901.graph_c0 | 5.0267185      | 4.846361       | 4.4146075      | 1.3499441      | 2.2309592      | 3.0269537      | 0.0064184 | -1.081285 | down      | PREDICTED: pentatricopeptide repeat-containing protein At5g18950 [Sesamum indicum]                  |
| c27911.graph_c0 | 0              | 0.0240952      | 0.0871033      | 3.0444191      | 4.9811312      | 3.2506869      | 1.573E-22 | 6.696917  | up        | PREDICTED: protein NK11/PIK FAMILY 6.5-like [Sesamum indicum]                                       |
| c27912.graph_c0 | 11.177513      | 13.730653      | 12.115344      | 3.192433       | 4.3804896      | 4.4367586      | 2.491E-13 | -1.587902 | down      | PREDICTED: uncharacterized protein LOC105168751 [Sesamum indicum]                                   |
| c27916.graph_c0 | 0.5700225      | 0.6660524      | 0.6566593      | 9.2655832      | 9.2754447      | 13.387793      | 2.27E-24  | 4.115104  | up        | PREDICTED: uncharacterized protein LOC105157022 [Sesamum indicum]                                   |
| c27926.graph_c0 | 49.098529      | 49.04501       | 45.709024      | 13.194195      | 18.794563      | 16.833519      | 1.497E-23 | -1.52249  | down      | PREDICTED: UPF0392 protein RCOM_0530710 [Sesamum indicum]                                           |
| c27942.graph_c0 | 6.2662454      | 6.4043516      | 5.7523557      | 18.202542      | 16.47853       | 17.2272        | 8.527E-11 | 1.538377  | up        | PREDICTED: 1-aminocyclopropane-1-carboxylate oxidase [Sesamum indicum]                              |
| c27945.graph_c0 | 25.5965        | 32.984538      | 28.21427       | 5.0333036      | 8.7775802      | 7.1657653      | 6.824E-18 | -2.015057 | down      | PREDICTED: uncharacterized protein LOC105169559 [Sesamum indicum]                                   |
| c27946.graph_c0 | 1.9149795      | 1.4048507      | 2.1485855      | 0.7079851      | 0.8035976      | 0.224986       | 0.0002209 | -1.60805  | down      | PREDICTED: putative germin-like protein 2-1 [Sesamum indicum]                                       |
| c27949.graph_c0 | 2.8232875      | 3.0756216      | 2.5541903      | 0.3889918      | 0.2472538      | 0.2076736      | 9.317E-13 | -3.270723 | down      | PREDICTED: uncharacterized protein LOC105156725 [Sesamum indicum]                                   |
| c27963.graph_c0 | 5.0779562      | 7.5171336      | 5.5408214      | 2.7692708      | 2.0615236      | 3.0634515      | 0.0034439 | -1.155295 | down      | -                                                                                                   |
| c27969.graph_c0 | 0.4659272      | 0.2734476      | 0.2281157      | 9.2428445      | 4.3483788      | 4.9660671      | 6.362E-06 | 4.318755  | up        | PREDICTED: S-type anion channel SLAH2-like [Sesamum indicum]                                        |
| c27970.graph_c0 | 15.095783      | 16.149053      | 16.933401      | 38.173148      | 30.535144      | 24.957426      | 0.001844  | 1.007554  | up        | Os05g0129800 [Oryza sativa Japonica Group]                                                          |
| c27971.graph_c0 | 1.3532146      | 1.3440085      | 1.5090898      | 6.4609601      | 8.2377532      | 11.90485       | 3.091E-08 | 2.695379  | up        | PREDICTED: EH domain-containing protein 1-like [Sesamum indicum]                                    |

| #ID             | 28 h-1<br>FPKM | 28 h-2<br>FPKM | 28 h-3<br>FPKM | 48 h-1<br>FPKM | 48 h-2<br>FPKM | 48 h-3<br>FPKM | FDR       | log2FC    | regulated | nr_annotation                                                                                                  |
|-----------------|----------------|----------------|----------------|----------------|----------------|----------------|-----------|-----------|-----------|----------------------------------------------------------------------------------------------------------------|
| c27974.graph_c0 | 362.87318      | 377.48491      | 342.1091       | 1010.4177      | 848.97164      | 653.55039      | 0.000133  | 1.263172  | up        | -                                                                                                              |
| c27976.graph_c0 | 4.8901448      | 3.6725744      | 3.9903182      | 7.588963       | 7.7941026      | 10.309334      | 0.0004716 | 1.072339  | up        | PREDICTED: homeobox-leucine zipper protein ATHB-40-like [Sesamum indicum]                                      |
| c27977.graph_c0 | 0.1394354      | 0.2937599      | 0.3034084      | 3.770553       | 5.1802941      | 6.1333874      | 9.217E-21 | 4.390807  | up        | PREDICTED: pyruvate kinase, cytosolic isozyme-like [Sesamum indicum]                                           |
| c27977.graph_c1 | 0.314052       | 0.1701357      | 0.2050111      | 3.9012241      | 7.0005822      | 6.1633032      | 3.777E-17 | 4.662415  | up        | Pyruvate kinase, cytosolic isozyme [Glycine soja]                                                              |
| c27988.graph_c0 | 134.4951       | 132.17635      | 140.0733       | 302.80185      | 564.28442      | 671.79679      | 0.0001853 | 1.949796  | up        | -                                                                                                              |
| c27993.graph_c0 | 3.6483349      | 3.3929275      | 2.7686207      | 6.4743465      | 6.4178632      | 9.5876747      | 3.512E-05 | 1.235298  | up        | PREDICTED: protein ECERIFERUM 1 [Sesamum indicum]                                                              |
| c27998.graph_c0 | 1.0840066      | 0.5918062      | 1.2548134      | 8.9793109      | 9.7156047      | 9.4398314      | 3.079E-31 | 3.302809  | up        | PREDICTED: pectinesterase 2.1-like [Sesamum indicum]                                                           |
| c28000.graph_c0 | 223.66438      | 176.70447      | 184.69047      | 416.17577      | 398.93732      | 350.56811      | 6.739E-11 | 1.038571  | up        | PREDICTED: uncharacterized protein LOC105170296 [Sesamum indicum]                                              |
| c28001.graph_c0 | 0.7308863      | 1.03702        | 0.7667965      | 1.3235031      | 2.2433458      | 2.060879       | 0.0072781 | 1.184505  | up        | ADP-ribosylation factor [Hyacinthus orientalis]                                                                |
| c28002.graph_c0 | 4.3738998      | 5.2423293      | 6.0010853      | 1.5700503      | 2.4949169      | 2.4884442      | 0.0007634 | -1.219326 | down      | PREDICTED: DELLA protein RGL2-like [Sesamum indicum]                                                           |
| c28007.graph_c0 | 0.4423395      | 0.2795737      | 0.3970399      | 3.139908       | 4.3955363      | 3.4424485      | 1.498E-13 | 3.331494  | up        | PREDICTED: purple acid phosphatase 17-like [Sesamum indicum]                                                   |
| c28016.graph_c0 | 2.4741231      | 2.6175004      | 3.3647738      | 1.2988027      | 1.3423648      | 0.7610489      | 0.0006004 | -1.268226 | down      | PREDICTED: uncharacterized protein LOC105171164 [Sesamum indicum]                                              |
| c28020.graph_c0 | 12.249237      | 11.900725      | 9.586114       | 2.0430013      | 1.9719289      | 1.979437       | 4.625E-17 | -2.449442 | down      | PREDICTED: very-long-chain 3-oxoacyl-CoA reductase-like protein At1g24470 [Sesamum indicum]                    |
| c28026.graph_c0 | 1.0858134      | 0.8169898      | 0.7678796      | 1.3304702      | 3.2077636      | 3.4698888      | 0.0080527 | 1.611706  | up        | PREDICTED: uncharacterized protein LOC105166116 [Sesamum indicum]                                              |
| c28036.graph_c0 | 8.1446968      | 8.7838221      | 7.1998399      | 3.2979454      | 3.9494828      | 3.0620786      | 0.0049795 | -1.1858   | down      | PREDICTED: MAD5-box protein SVF-like isoform X2 [Nicotiana glauca]                                             |
| c28049.graph_c0 | 12.245376      | 12.661392      | 11.979808      | 4.5063628      | 6.807292       | 6.6828909      | 0.0020282 | -1.000564 | down      | -                                                                                                              |
| c28052.graph_c0 | 0.5177232      | 0.3272188      | 0.5491953      | 2.0343821      | 4.3103622      | 3.503576       | 8.768E-07 | 2.850248  | up        | PREDICTED: pto-interacting protein 1 [Nicotiana glauca]                                                        |
| c28058.graph_c0 | 15.134019      | 13.837936      | 14.829527      | 23.928659      | 31.493547      | 30.782568      | 5.093E-10 | 1.013826  | up        | PREDICTED: coatamer subunit epsilon-1 [Sesamum indicum]                                                        |
| c28061.graph_c0 | 3.4973651      | 4.4620985      | 3.1019797      | 9.0108955      | 11.587866      | 16.764576      | 3.708E-05 | 1.791128  | up        | flavonoid 3-O-glucosyltransferase [Perilla frutescens]                                                         |
| c28062.graph_c0 | 7.9910251      | 8.1103259      | 8.7534756      | 4.373407       | 4.0739279      | 3.4888694      | 5.704E-06 | -1.01342  | down      | PREDICTED: uncharacterized CRM domain-containing protein At3g25440, chloroplastic isoform X1 [Sesamum indicum] |
| c28068.graph_c0 | 44.950504      | 54.623826      | 48.171366      | 110.41048      | 103.25199      | 87.200379      | 2.602E-08 | 1.071124  | up        | hypothetical protein MIMGU_mgv1a013790mg [Erythranthe guttata]                                                 |
| c28070.graph_c0 | 27.981699      | 37.645884      | 36.464383      | 1.5881581      | 1.5889909      | 1.4131335      | 4.351E-44 | -4.431995 | down      | -                                                                                                              |
| c28072.graph_c0 | 83.734671      | 93.505546      | 102.76597      | 13.517364      | 14.118317      | 12.705284      | 6.277E-58 | -2.753159 | down      | PREDICTED: uncharacterized protein LOC104888288 [Beta vulgaris subsp. vulgaris]                                |
| c28074.graph_c0 | 6.8725573      | 9.3344306      | 6.6624371      | 1.7125117      | 1.3409293      | 1.6562854      | 9.567E-09 | -2.234059 | down      | PREDICTED: dof zinc finger protein DOF5.4-like [Sesamum indicum]                                               |
| c28080.graph_c0 | 1.0276349      | 0.8660008      | 1.2717882      | 5.0150213      | 5.2438095      | 4.674828       | 3.5E-15   | 2.279674  | up        | PREDICTED: receptor-like protein kinase HSL1 [Sesamum indicum]                                                 |
| c28081.graph_c0 | 0.1386729      | 0.0250417      | 0.2036807      | 6.011611       | 3.9477704      | 3.9414387      | 1.521E-15 | 5.290227  | up        | PREDICTED: ent-kaurenoic acid oxidase 1-like [Sesamum indicum]                                                 |
| c28092.graph_c0 | 1.5288036      | 1.6989124      | 1.1995108      | 6.186281       | 14.212658      | 19.100006      | 0.0002346 | 3.184713  | up        | PREDICTED: ammonium transporter 1 member 2-like, partial [Sesamum indicum]                                     |

| #ID             | 28 h-1<br>FPKM | 28 h-2<br>FPKM | 28 h-3<br>FPKM | 48 h-1<br>FPKM | 48 h-2<br>FPKM | 48 h-3<br>FPKM | FDR       | log2FC    | regulated | nr_annotation                                                                    |
|-----------------|----------------|----------------|----------------|----------------|----------------|----------------|-----------|-----------|-----------|----------------------------------------------------------------------------------|
| c28093.graph_c0 | 571.85092      | 623.61211      | 643.24863      | 35.895649      | 35.168559      | 27.610771      | 3.44E-122 | -4.175371 | down      | hypothetical protein MIMGU_mgv1a010438mg [Erythranthe guttata]                   |
| c28104.graph_c0 | 369.96815      | 385.37216      | 415.39164      | 71.250003      | 54.158496      | 88.82859       | 5.649E-47 | -2.40759  | down      | -                                                                                |
| c28141.graph_c0 | 12.549707      | 12.633646      | 12.197328      | 21.644498      | 29.394596      | 31.99011       | 9.714E-09 | 1.187169  | up        | PREDICTED: U-box domain-containing protein 11-like [Sesamum indicum]             |
| c28142.graph_c1 | 8.4668484      | 6.9744942      | 6.8925074      | 2.7466688      | 2.7211668      | 2.3760813      | 3.795E-09 | -1.466068 | down      | PREDICTED: trihelix transcription factor PTL [Sesamum indicum]                   |
| c28151.graph_c0 | 2.9287195      | 3.0023291      | 3.422961       | 8.6729987      | 12.622753      | 14.698707      | 5.601E-09 | 1.978001  | up        | PREDICTED: uncharacterized protein LOC105163554 [Sesamum indicum]                |
| c28155.graph_c0 | 1.9601369      | 2.4042835      | 2.5651648      | 0.1875183      | 0.4966323      | 0.3754185      | 7.698E-09 | -2.681699 | down      | PREDICTED: uncharacterized protein LOC104750095 [Camelina sativa]                |
| c28160.graph_c0 | 8.0515825      | 7.384762       | 7.7905441      | 14.118936      | 16.880382      | 22.146676      | 3.6E-06   | 1.230567  | up        | unnamed protein product [Coffea canephora]                                       |
| c28167.graph_c0 | 0.4259931      | 0.5384846      | 0.4866496      | 1.133953       | 1.1440816      | 1.7777347      | 0.0004501 | 1.520896  | up        | PREDICTED: uncharacterized protein LOC105111765 [Sesamum indicum]                |
| c28171.graph_c0 | 5.2272778      | 7.0191031      | 8.5308319      | 72.715659      | 95.751825      | 94.482996      | 8.972E-59 | 3.698372  | up        | Protein of unknown function UPF0057 [Medicago truncatula]                        |
| c28172.graph_c0 | 48.629469      | 47.200148      | 43.886833      | 92.751025      | 101.69539      | 109.89408      | 3.594E-16 | 1.16301   | up        | PREDICTED: 1,4-dihydroxy-2-naphthoyl-CoA synthase, peroxisomal [Sesamum indicum] |
| c28174.graph_c0 | 0.7062933      | 0.5904784      | 0.6830573      | 2.3874102      | 3.2317193      | 3.1864548      | 1.882E-08 | 2.189402  | up        | PREDICTED: cytochrome P450 94A1 [Sesamum indicum]                                |
| c28183.graph_c0 | 0.2140103      | 0.2810637      | 0.4127634      | 1.9975621      | 2.0116724      | 2.2601745      | 8.74E-12  | 2.828027  | up        | PREDICTED: LOW QUALITY PROTEIN: protein tesmin/TSO1-like CXC 2 [Sesamum indicum] |
| c28188.graph_c1 | 0.0456275      | 0.123592       | 0.0744633      | 1.96643        | 1.8993829      | 1.1321702      | 8.949E-11 | 4.406101  | up        | PREDICTED: omega-hydroxypalmitate O-feruloyl transferase [Sesamum indicum]       |
| c28198.graph_c0 | 4.735642       | 5.3337807      | 4.8601847      | 0.3713057      | 0.2294561      | 0.0825964      | 4.373E-27 | -4.389331 | down      | PREDICTED: flavonoid 3'-monooxygenase-like [Sesamum indicum]                     |
| c28206.graph_c0 | 1.3645587      | 1.2092525      | 1.5052448      | 4.6124764      | 6.6848112      | 8.3223118      | 1.796E-08 | 2.299318  | up        | PREDICTED: cytokinin dehydrogenase 3-like [Sesamum indicum]                      |
| c28207.graph_c0 | 6.0253454      | 8.0284363      | 6.5395987      | 1.2976452      | 3.4171059      | 4.3546307      | 0.0016432 | -1.157257 | down      | PREDICTED: piriformospora indica-insensitive protein 2-like [Sesamum indicum]    |
| c28209.graph_c0 | 4.4003084      | 3.719466       | 4.5073687      | 1.4240975      | 0.5028862      | 0.950365       | 6.213E-06 | -2.077    | down      | PREDICTED: zinc finger CCCH domain-containing protein 23 [Sesamum indicum]       |
| c28209.graph_c1 | 5.5052287      | 6.1004111      | 7.5551         | 0.5709504      | 1.0080879      | 0.5080282      | 3.612E-14 | -3.163091 | down      | PREDICTED: zinc finger CCCH domain-containing protein 20-like [Sesamum indicum]  |
| c28213.graph_c0 | 18.212922      | 17.072516      | 16.510914      | 37.825037      | 37.882163      | 35.004711      | 1.097E-14 | 1.138737  | up        | PREDICTED: probable mitochondrial chaperone BCS1-A [Sesamum indicum]             |
| c28223.graph_c0 | 22.22045       | 24.986865      | 22.183112      | 50.967151      | 47.107703      | 59.487796      | 3.581E-11 | 1.224869  | up        | PREDICTED: 50S ribosomal protein L29, chloroplastic-like [Solanum lycopersicum]  |
| c28226.graph_c0 | 4.2315633      | 2.7104146      | 3.7480426      | 6.189021       | 6.4593837      | 10.034893      | 0.0018579 | 1.12226   | up        | hypothetical protein MIMGU_mgv1a020800mg [Erythranthe guttata]                   |
| c28250.graph_c0 | 1.5350499      | 1.902822       | 1.7833459      | 0.0659589      | 0.1048133      | 0.1760696      | 8.871E-14 | -3.881819 | down      | PREDICTED: probable glycosyltransferase At5g11150 [Sesamum indicum]              |
| c28251.graph_c0 | 17.171052      | 17.673972      | 18.763635      | 56.684231      | 72.897992      | 77.102583      | 1.721E-27 | 1.98374   | up        | PREDICTED: fasciclin-like arabinogalactan protein 7 [Sesamum indicum]            |
| c28256.graph_c0 | 2.9719861      | 3.8015185      | 3.0987598      | 8.5111069      | 10.531551      | 13.035719      | 1.117E-10 | 1.736857  | up        | PREDICTED: malate dehydrogenase [NADP], chloroplastic [Nicotiana glauca]         |
| c28262.graph_c0 | 34.985397      | 32.439212      | 35.159407      | 10.74827       | 12.482966      | 12.184921      | 8.168E-13 | -1.495001 | down      | hypothetical protein MIMGU_mgv1a015596mg [Erythranthe guttata]                   |

| #ID             | 28 h-1<br>FPKM | 28 h-2<br>FPKM | 28 h-3<br>FPKM | 48 h-1<br>FPKM | 48 h-2<br>FPKM | 48 h-3<br>FPKM | FDR       | log2FC    | regulated | nr_annotation                                                                       |
|-----------------|----------------|----------------|----------------|----------------|----------------|----------------|-----------|-----------|-----------|-------------------------------------------------------------------------------------|
| c28266.graph_c0 | 1.1691501      | 0.867127       | 1.022161       | 7.4099192      | 6.7845658      | 7.3468217      | 2.738E-15 | 2.8592    | up        | PREDICTED: protein trichome birefringence-like 41 [Sesamum indicum]                 |
| c28274.graph_c0 | 12.166951      | 12.908914      | 11.636832      | 33.270512      | 37.282297      | 35.589834      | 1.231E-21 | 1.572138  | up        | PREDICTED: uncharacterized protein LOC105166742 isoform X3 [Sesamum indicum]        |
| c28276.graph_c0 | 4.9760153      | 4.7717434      | 4.9284708      | 13.963425      | 11.566764      | 11.147279      | 3.45E-08  | 1.36767   | up        | PREDICTED: uncharacterized protein LOC105160855 [Sesamum indicum]                   |
| c28280.graph_c0 | 13.616554      | 13.484259      | 17.526702      | 7.9618642      | 5.426475       | 3.6165215      | 6.901E-06 | -1.338759 | down      | -                                                                                   |
| c28297.graph_c0 | 0.0822222      | 0.1855973      | 0.6709261      | 5.159021       | 3.4779545      | 6.7697779      | 4.42E-10  | 4.077047  | up        | PREDICTED: CTD small phosphatase-like protein [Sesamum indicum]                     |
| c28308.graph_c0 | 2.7686853      | 2.3528125      | 3.6214042      | 268.58093      | 265.88474      | 341.75669      | 1.16E-111 | 6.686388  | up        | PREDICTED: uncharacterized oxidoreductase At4g09670-like [Sesamum indicum]          |
| c28312.graph_c0 | 10.186393      | 9.5263045      | 10.024359      | 3.1217861      | 4.3638776      | 5.6376749      | 1.473E-09 | -1.146214 | down      | PREDICTED: uncharacterized protein LOC105156551 [Sesamum indicum]                   |
| c28313.graph_c0 | 0.4376176      | 0.3647332      | 0.3021551      | 3.9683277      | 4.656001       | 5.3534428      | 2.568E-19 | 3.699905  | up        | malate dehydrogenase, putative [Ricinus communis]                                   |
| c28318.graph_c0 | 8.0358907      | 7.3320312      | 8.9385278      | 40.503084      | 36.603937      | 34.250549      | 6.263E-34 | 2.240221  | up        | PREDICTED: pectinesterase 1-like [Sesamum indicum]                                  |
| c28334.graph_c0 | 10.755455      | 10.260522      | 10.185707      | 24.430532      | 31.310437      | 38.761185      | 4.579E-09 | 1.63451   | up        | hypothetical protein MIMGU_mgv1a019816mg [Erythranthe guttata]                      |
| c28336.graph_c0 | 2.4395728      | 2.252767       | 2.9407646      | 3.7951423      | 5.2862038      | 6.5661843      | 0.0056264 | 1.069487  | up        | PREDICTED: mavicyanin [Sesamum indicum]                                             |
| c28346.graph_c1 | 18.120831      | 19.75859       | 16.660153      | 39.731953      | 42.091187      | 46.367991      | 5.834E-18 | 1.273388  | up        | PREDICTED: lysM domain-containing GPI-anchored protein 1 [Sesamum indicum]          |
| c28349.graph_c0 | 0.2281499      | 0.2832473      | 0.2792527      | 1.7713307      | 1.531845       | 1.9621078      | 6.065E-10 | 2.778121  | up        | PREDICTED: L-tryptophan--pyruvate aminotransferase 1-like [Sesamum indicum]         |
| c28364.graph_c0 | 11.816752      | 8.7072272      | 10.861524      | 20.487975      | 26.081909      | 26.502549      | 8.467E-05 | 1.256357  | up        | PREDICTED: uncharacterized protein At3g50808-like [Malus domestica]                 |
| c28365.graph_c0 | 0.2980318      | 0.4709159      | 0.9119683      | 2.4555525      | 3.3017263      | 3.7816197      | 3.056E-08 | 2.538743  | up        | -                                                                                   |
| c28379.graph_c0 | 0.2343368      | 0.0906789      | 0.1639002      | 1.2305906      | 1.1238461      | 1.548064       | 9.71E-11  | 3.037023  | up        | PREDICTED: uncharacterized protein LOC105158982 [Sesamum indicum]                   |
| c28382.graph_c0 | 22.802143      | 23.949028      | 24.995972      | 78.182463      | 77.085971      | 85.332985      | 3.23E-35  | 1.787094  | up        | hypothetical protein JCGZ_02248 [Jatropha curcas]                                   |
| c28389.graph_c0 | 3.7705965      | 4.6958554      | 5.1633252      | 1.5382327      | 2.6189535      | 2.2485954      | 0.0061729 | -1.055907 | down      | PREDICTED: endo-1,3;1,4-beta-D-glucanase-like [Sesamum indicum]                     |
| c28401.graph_c0 | 9.5994765      | 8.9982451      | 10.344468      | 3.0652323      | 4.723261       | 3.4299439      | 2.524E-06 | -1.331181 | down      | -                                                                                   |
| c28410.graph_c0 | 2.3307955      | 1.625537       | 2.1642425      | 0.8150221      | 0.7123191      | 0.7070717      | 0.0001463 | -1.409258 | down      | unnamed protein product [Coffea canephora]                                          |
| c28421.graph_c0 | 12.190781      | 16.998356      | 8.8143094      | 0.195604       | 1.0360934      | 0.5221417      | 5.668E-10 | -4.415307 | down      | -                                                                                   |
| c28432.graph_c0 | 1.8161249      | 1.2389528      | 1.3502148      | 15.091361      | 10.784766      | 14.566185      | 2.393E-20 | 3.244502  | up        | PREDICTED: CASP-like protein 4B1 [Sesamum indicum]                                  |
| c28441.graph_c0 | 0.6295947      | 0.6340571      | 0.7508569      | 1.8109771      | 2.8615074      | 2.6219334      | 1.741E-06 | 1.890497  | up        | PREDICTED: LOW QUALITY PROTEIN: protein NRT1/ PTR FAMILY 2.7-like [Sesamum indicum] |
| c28447.graph_c0 | 17.078535      | 11.301191      | 12.472353      | 0.5931041      | 0.6806821      | 2.6387025      | 7.229E-14 | -3.356572 | down      | PREDICTED: putative expansin-B2 [Sesamum indicum]                                   |
| c28449.graph_c0 | 12.968606      | 14.317213      | 13.33182       | 2.83549        | 5.3613158      | 7.1857649      | 1.106E-09 | -1.371422 | down      | PREDICTED: L-type lectin-domain containing receptor kinase S.1 [Sesamum indicum]    |
| c28450.graph_c0 | 6.6092414      | 5.9524558      | 6.5915508      | 33.383866      | 27.656426      | 27.972927      | 5.495E-24 | 2.262131  | up        | PREDICTED: beta-galactosidase-like [Sesamum indicum]                                |

| #ID             | 28 h-1<br>FPKM | 28 h-2<br>FPKM | 28 h-3<br>FPKM | 48 h-1<br>FPKM | 48 h-2<br>FPKM | 48 h-3<br>FPKM | FDR       | log2FC    | regulated | nr_annotation                                                                      |
|-----------------|----------------|----------------|----------------|----------------|----------------|----------------|-----------|-----------|-----------|------------------------------------------------------------------------------------|
| c28599.graph_c0 | 1.9629675      | 2.1210397      | 1.7330577      | 0.4486929      | 0.5617604      | 1.016258       | 0.0009798 | -1.487823 | down      | PREDICTED: uncharacterized protein LOC105178353 [Sesamum indicum]                  |
| c28609.graph_c0 | 11.143646      | 11.206746      | 10.857462      | 48.93816       | 45.227439      | 58.528821      | 3.129E-30 | 2.24243   | up        | PREDICTED: allantoinase [Sesamum indicum]                                          |
| c28711.graph_c0 | 86.835038      | 81.998279      | 80.93715       | 22.267893      | 30.246413      | 25.954968      | 1.311E-29 | -1.632851 | down      | hypothetical protein MIMGU_mgv1a018814mg [Erythranthe guttata]                     |
| c28850.graph_c0 | 21.329796      | 22.931314      | 20.585638      | 6.3526415      | 7.1850125      | 7.1817324      | 1.893E-20 | -1.606113 | down      | PREDICTED: cyclic dof factor 2-like [Sesamum indicum]                              |
| c28866.graph_c0 | 4.6660957      | 2.6758542      | 3.3444222      | 5.6748381      | 6.943209       | 10.525587      | 0.0065999 | 1.149452  | up        | unnamed protein product [Coffea canephora]                                         |
| c29044.graph_c0 | 162.96693      | 165.24018      | 157.2878       | 357.47608      | 360.02481      | 398.86623      | 4.813E-18 | 1.242471  | up        | Gip1-like protein [Populus tomentosa]                                              |
| c29248.graph_c0 | 3.4589166      | 4.429544       | 5.251327       | 12.664195      | 13.934321      | 17.951925      | 7.075E-13 | 1.799255  | up        | hypothetical protein MIMGU_mgv1a000889mg [Erythranthe guttata]                     |
| c29266.graph_c0 | 7.1974292      | 7.1371949      | 7.1291279      | 14.713253      | 18.184725      | 20.787281      | 1.543E-13 | 1.359669  | up        | PREDICTED: uncharacterized protein LOC105158344 [Sesamum indicum]                  |
| c29273.graph_c1 | 7.7102308      | 6.3780883      | 7.7141215      | 2.3051999      | 2.9870066      | 4.3904845      | 9.595E-07 | -1.137115 | down      | PREDICTED: uncharacterized mitochondrial protein ymf11 [Sesamum indicum]           |
| c29442.graph_c0 | 2.3779721      | 3.3529834      | 2.5783474      | 21.512695      | 22.308919      | 24.689701      | 2.506E-49 | 3.084532  | up        | PREDICTED: uncharacterized protein LOC105176814 [Sesamum indicum]                  |
| c29644.graph_c0 | 13.989773      | 14.80746       | 12.2789        | 27.642722      | 27.31079       | 32.15423       | 3.727E-08 | 1.125738  | up        | PREDICTED: homeobox-leucine zipper protein HOX21-like [Sesamum indicum]            |
| c29668.graph_c0 | 157.60527      | 169.74096      | 158.96904      | 353.4881       | 365.64055      | 386.68338      | 5.934E-16 | 1.226244  | up        | PREDICTED: 20 kDa chaperonin, chloroplastic-like [Sesamum indicum]                 |
| c29706.graph_c0 | 0.3113092      | 1.0540614      | 0.9208434      | 2.7622515      | 1.9856835      | 2.1506054      | 0.0001886 | 1.641695  | up        | PREDICTED: uncharacterized protein LOC105173288 [Sesamum indicum]                  |
| c29711.graph_c0 | 0.5834154      | 0.3160616      | 0.2856373      | 7.0994109      | 14.101809      | 10.967037      | 1.063E-14 | 4.794479  | up        | hypothetical protein MIMGU_mgv1a021530mg [Erythranthe guttata]                     |
| c29801.graph_c0 | 0.4278409      | 0.7726004      | 0.0872787      | 5.2876185      | 3.8780243      | 5.7906352      | 2.161E-13 | 3.584929  | up        | PREDICTED: basic blue protein-like [Cucumis sativus]                               |
| c29807.graph_c0 | 69.973135      | 74.097242      | 73.332144      | 245.03831      | 321.24874      | 355.50936      | 3.083E-20 | 2.120355  | up        | PREDICTED: annexin D1-like [Sesamum indicum]                                       |
| c29866.graph_c0 | 1.1528418      | 0.5782823      | 0.6794013      | 3.8156479      | 5.4182899      | 7.8015995      | 7.88E-07  | 2.853909  | up        | Isoflavone reductase-like protein 4 isoform 2 [Theobroma cacao]                    |
| c29900.graph_c0 | 15.799878      | 15.596151      | 17.036612      | 27.140453      | 41.044244      | 32.529223      | 2.255E-06 | 1.092194  | up        | PREDICTED: remorin-like [Sesamum indicum]                                          |
| c29995.graph_c0 | 0.4027622      | 0              | 0.2957856      | 1.4294861      | 2.1092971      | 1.6353619      | 3.819E-10 | 2.923632  | up        | PREDICTED: transcription factor bHLH126-like [Sesamum indicum]                     |
| c30053.graph_c0 | 10.33574       | 11.207367      | 11.350268      | 3.5508228      | 3.5995254      | 3.0233154      | 5.313E-13 | -1.649665 | down      | PREDICTED: pentatricopeptide repeat-containing protein At1g31790 [Sesamum indicum] |
| c30289.graph_c0 | 1.9000031      | 1.6797845      | 1.905684       | 3.2613667      | 8.7704418      | 10.893453      | 0.0083307 | 2.088449  | up        | PREDICTED: two-component response regulator ARR8 [Sesamum indicum]                 |
| c30990.graph_c0 | 0.6795975      | 0.5850727      | 0.5674424      | 1.4023439      | 2.0374126      | 1.0338891      | 0.0044505 | 1.327547  | up        | PREDICTED: sucrose synthase 5-like [Sesamum indicum]                               |
| c31084.graph_c0 | 4.2153545      | 3.8582078      | 3.5339331      | 6.733987       | 10.700764      | 9.639081       | 0.0001785 | 1.256448  | up        | PREDICTED: uncharacterized protein LOC105169559 [Sesamum indicum]                  |
| c31286.graph_c0 | 0.3006333      | 0.348999       | 0.2628367      | 2.123131       | 2.2780358      | 3.4150005      | 3.033E-12 | 3.136271  | up        | PREDICTED: kinesin KP1-like isoform X2 [Sesamum indicum]                           |
| c31599.graph_c0 | 36.870338      | 43.126922      | 38.487336      | 85.050502      | 73.019192      | 78.767025      | 6.255E-13 | 1.043899  | up        | PREDICTED: uncharacterized protein LOC105172751 isoform X2 [Sesamum indicum]       |
| c31795.graph_c0 | 3.8752211      | 3.7176464      | 3.2362616      | 1.8420481      | 1.3416058      | 1.7073368      | 0.0036058 | -1.100218 | down      | PREDICTED: uncharacterized protein LOC105176312 isoform X1 [Sesamum indicum]       |

| #ID             | 28 h-1<br>FPKM | 28 h-2<br>FPKM | 28 h-3<br>FPKM | 48 h-1<br>FPKM | 48 h-2<br>FPKM | 48 h-3<br>FPKM | FDR       | log2FC    | regulated | nr_annotation                                                                                          |
|-----------------|----------------|----------------|----------------|----------------|----------------|----------------|-----------|-----------|-----------|--------------------------------------------------------------------------------------------------------|
| c32206.graph_c0 | 29.693066      | 33.136606      | 32.805628      | 63.336923      | 72.496463      | 83.563551      | 1.566E-17 | 1.236287  | up        | PREDICTED: magnesium-chelatase subunit ChII, chloroplastic-like [Sesamum indicum]                      |
| c32277.graph_c0 | 18.871264      | 15.758008      | 17.438495      | 67.194949      | 50.410038      | 40.689481      | 9.864E-05 | 1.654003  | up        | hypothetical protein MIMGU_mgv1a005557mg [Erythranthe guttata]                                         |
| c32358.graph_c0 | 18.679112      | 23.601847      | 19.396893      | 3.727598       | 5.2652507      | 4.3916813      | 8.576E-28 | -2.166851 | down      | PREDICTED: uncharacterized protein LOC105114506 [Sesamum indicum]                                      |
| c32363.graph_c0 | 0.7058411      | 0.7137853      | 0.5298837      | 2.7199049      | 4.2462877      | 6.9738679      | 0.0002128 | 2.869072  | up        | PREDICTED: omega-3 fatty acid desaturase, endoplasmic reticulum [Sesamum indicum]                      |
| c32363.graph_c1 | 1.5109566      | 2.2037919      | 2.3394023      | 6.1877267      | 9.3124695      | 9.919183       | 1.142E-10 | 2.103986  | up        | PREDICTED: disease resistance response protein 206-like [Sesamum indicum]                              |
| c32388.graph_c1 | 26.67738       | 24.669723      | 25.064705      | 43.807308      | 54.206068      | 55.115465      | 6.772E-13 | 1.040817  | up        | hypothetical protein CICLE_v10011936mg [Citrus clementina]                                             |
| c32414.graph_c0 | 25.099756      | 28.035451      | 26.575601      | 126.2078       | 96.54419       | 102.798        | 2.74E-14  | 2.077152  | up        | hypothetical protein MIMGU_mgv1a007303mg [Erythranthe guttata]                                         |
| c32432.graph_c0 | 31.269916      | 38.88373       | 35.244619      | 70.346124      | 67.2304        | 76.040645      | 5.47E-13  | 1.061266  | up        | PREDICTED: ferredoxin, root R-B1-like [Sesamum indicum]                                                |
| c32432.graph_c1 | 4.8981441      | 3.1993022      | 2.7212566      | 6.0766571      | 7.2771529      | 9.4034313      | 0.0050943 | 1.109668  | up        | PREDICTED: glucan endo-1,5-beta-glucosidase 14-like [Sesamum indicum]                                  |
| c32525.graph_c0 | 8.4988595      | 7.3400353      | 6.532971       | 1.4051648      | 2.1502025      | 2.3616914      | 2.745E-05 | -1.884802 | down      | hypothetical protein MIMGU_mgv1a012373mg [Erythranthe guttata]                                         |
| c32527.graph_c0 | 12.840295      | 15.138383      | 14.17111       | 3.2786226      | 4.1555591      | 3.0214879      | 2.095E-12 | -1.971164 | down      | PREDICTED: uncharacterized protein LOC105113965 [Sesamum indicum]                                      |
| c32529.graph_c0 | 80.220517      | 77.35223       | 76.309875      | 150.73205      | 183.10045      | 172.66013      | 1.053E-15 | 1.153667  | up        | PREDICTED: FK506-binding protein 2-like [Sesamum indicum]                                              |
| c32550.graph_c0 | 44.502667      | 52.331174      | 44.034072      | 14.391317      | 18.163272      | 14.623344      | 9.285E-16 | -1.538532 | down      | hypothetical protein MIMGU_mgv1a022013mg [Erythranthe guttata]                                         |
| c32583.graph_c0 | 9.5967749      | 12.171285      | 11.363896      | 24.555557      | 38.480999      | 40.225023      | 1.099E-07 | 1.673788  | up        | PREDICTED: caffeoylshikimate esterase [Sesamum indicum]                                                |
| c32620.graph_c0 | 6.8888993      | 7.1296788      | 7.6209524      | 16.774083      | 18.720771      | 18.21154       | 6.175E-13 | 1.35154   | up        | tyrosine aminotransferase [Perilla frutescens]                                                         |
| c32871.graph_c0 | 4.4760851      | 4.290192       | 3.3152998      | 1.8330634      | 1.1096619      | 1.3203728      | 0.0009573 | -1.451515 | down      | -                                                                                                      |
| c32901.graph_c0 | 18.509731      | 23.346542      | 18.985425      | 7.4626106      | 10.245827      | 11.846092      | 9.951E-06 | -1.006203 | down      | -                                                                                                      |
| c32907.graph_c0 | 0.7397592      | 0.4624153      | 0.3250356      | 2.4524444      | 2.4452399      | 2.1179888      | 4.561E-07 | 2.243628  | up        | PREDICTED: LOW QUALITY PROTEIN: anthranilate synthase alpha subunit 1, chloroplastic [Sesamum indicum] |
| c32968.graph_c0 | 6.1999516      | 5.1901755      | 7.3038805      | 28.937389      | 39.091474      | 48.301245      | 4.399E-13 | 2.671909  | up        | PREDICTED: transcription factor DIVARICATA [Sesamum indicum]                                           |
| c32997.graph_c0 | 228.16436      | 205.24896      | 211.20325      | 498.90502      | 440.50411      | 510.876        | 9.74E-17  | 1.213061  | up        | -                                                                                                      |
| c32998.graph_c0 | 41.03611       | 45.356465      | 45.273834      | 21.061101      | 18.450046      | 12.896649      | 6.471E-17 | -1.281212 | down      | PREDICTED: cytochrome P450 CYP82D47-like [Sesamum indicum]                                             |
| c33108.graph_c0 | 19.436855      | 21.3765        | 19.926716      | 43.609053      | 53.690753      | 53.069458      | 6.476E-21 | 1.346169  | up        | unnamed protein product [Coffea canephora]                                                             |
| c33120.graph_c0 | 17.566748      | 22.533334      | 24.119746      | 261.61843      | 160.07675      | 121.43794      | 9.775E-05 | 3.135072  | up        | PREDICTED: universal stress protein A-like protein [Sesamum indicum]                                   |
| c33186.graph_c0 | 19.632877      | 22.060617      | 23.083311      | 42.490926      | 41.157152      | 42.512004      | 2.341E-10 | 1.004101  | up        | PREDICTED: uncharacterized protein LOC105156000 [Sesamum indicum]                                      |
| c33275.graph_c0 | 0.1344479      | 0.0242788      | 0.065825       | 0.7839442      | 1.5526624      | 1.3950977      | 1.39E-10  | 4.08492   | up        | PREDICTED: amino acid permease 6 [Sesamum indicum]                                                     |
| c33310.graph_c0 | 15.533513      | 16.261008      | 15.665548      | 24.146771      | 42.405236      | 49.059526      | 0.0014593 | 1.315803  | up        | PREDICTED: beta-xylosidase/alpha-L-arabinofuranosidase 2-like [Sesamum indicum]                        |
| c33366.graph_c0 | 22.264098      | 21.729568      | 22.885312      | 65.580215      | 86.313481      | 95.109267      | 7.054E-18 | 1.921047  | up        | PREDICTED: lamin-like protein-like [Solanum tuberosum]                                                 |



| #ID             | 28 h-1<br>FPKM | 28 h-2<br>FPKM | 28 h-3<br>FPKM | 48 h-1<br>FPKM | 48 h-2<br>FPKM | 48 h-3<br>FPKM | FDR       | log2FC    | regulated | nr_annotation                                                                                |
|-----------------|----------------|----------------|----------------|----------------|----------------|----------------|-----------|-----------|-----------|----------------------------------------------------------------------------------------------|
| c33432.graph_c0 | 2.9863243      | 2.7947786      | 2.8637038      | 10.554872      | 10.274199      | 11.210989      | 3.435E-18 | 1.931842  | up        | PREDICTED: WEB family protein At2g38370 [Sesamum indicum]                                    |
| c33448.graph_c0 | 12.420326      | 11.057546      | 12.190211      | 3.9634435      | 5.4817508      | 5.877747       | 0.0011543 | -1.183509 | down      | hypothetical protein MIMGU_mgv1a007817mg [Erythranthe guttata]                               |
| c33463.graph_c0 | 0.3365733      | 0.2194791      | 0.3356724      | 4.4796304      | 2.8624406      | 3.3743477      | 7.628E-13 | 3.636288  | up        | PREDICTED: 187-kDa microtubule-associated protein AIR9-like [Nicotiana sylvestris]           |
| c33473.graph_c0 | 27.658587      | 21.952764      | 20.139166      | 9.3077777      | 10.901288      | 10.628573      | 1.66E-07  | -1.138042 | down      | -                                                                                            |
| c33475.graph_c0 | 5.8934843      | 4.5045116      | 6.5537082      | 0.1737308      | 0.2576654      | 0.0618339      | 4.548E-31 | -5.061279 | down      | PREDICTED: uncharacterized protein LOC102591997 [Solanium tuberosum]                         |
| c33480.graph_c0 | 1.0586357      | 0.9446035      | 0.9654661      | 4.6887519      | 5.619418       | 6.1948224      | 9.605E-25 | 2.512688  | up        | PREDICTED: uncharacterized protein LOC105159750 isoform X2 [Sesamum indicum]                 |
| c33514.graph_c0 | 0.4697843      | 0.381754       | 0.3450061      | 2.6201391      | 2.8388042      | 3.867978       | 2.049E-11 | 3.000599  | up        | PREDICTED: alpha-mannosidase-like [Sesamum indicum]                                          |
| c33519.graph_c0 | 0.2234944      | 0.1681621      | 0.455924       | 2.6913083      | 3.4013299      | 3.7391085      | 4.984E-15 | 3.571255  | up        | PREDICTED: protein IQ-DOMAIN 1 [Sesamum indicum]                                             |
| c33521.graph_c0 | 0.1168623      | 0.1055157      | 0.3814346      | 4.5920769      | 10.984916      | 8.3038114      | 2.177E-09 | 5.332372  | up        | -                                                                                            |
| c33538.graph_c0 | 4.4071731      | 4.2913632      | 4.4776431      | 0.7667631      | 1.7406267      | 0.7309941      | 7.119E-07 | -1.9923   | down      | -                                                                                            |
| c33557.graph_c0 | 15.965597      | 15.879013      | 14.87672       | 45.667093      | 69.654162      | 89.230338      | 1.866E-06 | 2.163101  | up        | PREDICTED: prolyl endopeptidase-like [Sesamum indicum]                                       |
| c33563.graph_c0 | 0.4223571      | 0.5243547      | 0.3446399      | 1.3049612      | 2.2331855      | 1.9650174      | 5.258E-07 | 2.125446  | up        | PREDICTED: DNA-damage-repair/toleration protein DRT100 [Sesamum indicum]                     |
| c33576.graph_c0 | 2.0428117      | 1.5510294      | 2.386723       | 0.2354013      | 0.1870343      | 0.2094587      | 2.745E-10 | -3.197462 | down      | PREDICTED: pathogenesis-related protein 5-like [Sesamum indicum]                             |
| c33588.graph_c0 | 4.6637173      | 5.0024219      | 5.0073095      | 10.489766      | 11.913121      | 14.71249       | 1.895E-08 | 1.376706  | up        | PREDICTED: light-induced protein, chloroplastic-like [Sesamum indicum]                       |
| c33596.graph_c0 | 143.40524      | 137.01315      | 153.84276      | 55.716997      | 62.781564      | 56.844134      | 6.657E-18 | -1.267951 | down      | PREDICTED: uncharacterized protein LOC105160439 [Sesamum indicum]                            |
| c33599.graph_c0 | 44.664023      | 41.912878      | 50.406447      | 13.754234      | 9.0690518      | 6.3985177      | 3.377E-27 | -2.175228 | down      | hypothetical protein MIMGU_mgv1a014857mg [Erythranthe guttata]                               |
| c33599.graph_c1 | 14.154082      | 10.917424      | 12.188036      | 40.61595       | 42.120321      | 45.124647      | 7.438E-31 | 1.819584  | up        | PREDICTED: probable plastid-lipid-associated protein 6, chloroplastic [Nicotiana sylvestris] |
| c33607.graph_c0 | 4.3740911      | 5.2658589      | 5.1375175      | 24.782157      | 18.689068      | 17.154942      | 1.326E-08 | 2.085306  | up        | PREDICTED: neurofilament medium polypeptide [Sesamum indicum]                                |
| c33621.graph_c0 | 0.7237481      | 0.5601229      | 1.2936351      | 3.6259304      | 2.5453957      | 4.9755466      | 6.21E-05  | 2.153384  | up        | PREDICTED: E3 ubiquitin ligase BIG BROTHER [Sesamum indicum]                                 |
| c33632.graph_c0 | 0.1690232      | 0.0872069      | 0.0591092      | 4.1931662      | 3.1127482      | 1.9608459      | 7.037E-09 | 4.929887  | up        | PREDICTED: probable receptor-like protein kinase At5g39020 [Nicotiana sylvestris]            |
| c33637.graph_c0 | 14.211379      | 13.45578       | 13.85296       | 44.207254      | 45.388059      | 33.270427      | 1.002E-10 | 1.609284  | up        | hypothetical protein MIMGU_mgv1a025918mg [Erythranthe guttata]                               |
| c33642.graph_c0 | 28.408707      | 32.685319      | 30.125874      | 58.269554      | 59.878446      | 67.868697      | 1.234E-11 | 1.068654  | up        | PREDICTED: 50S ribosomal protein L18, chloroplastic [Nicotiana tomentosiformis]              |
| c33649.graph_c0 | 7.862962       | 9.3280656      | 7.423126       | 16.760454      | 23.437483      | 25.293044      | 1.856E-09 | 1.447532  | up        | hypothetical protein MIMGU_mgv1a010621mg [Erythranthe guttata]                               |
| c33657.graph_c0 | 4.1157812      | 4.3918308      | 4.274383       | 13.516917      | 17.987345      | 20.256457      | 4.404E-16 | 2.053655  | up        | PREDICTED: uncharacterized protein LOC105180227 [Sesamum indicum]                            |
| c33657.graph_c1 | 0.7002528      | 1.1240224      | 0.6983784      | 2.3669918      | 3.2389069      | 2.9836914      | 4.324E-05 | 1.80534   | up        | hypothetical protein MIMGU_mgv1a008629mg [Erythranthe guttata]                               |
| c33662.graph_c0 | 230.54735      | 246.19083      | 270.52799      | 43.579015      | 38.491914      | 38.429243      | 1.636E-67 | -2.588107 | down      | hypothetical protein MIMGU_mgv1a015081mg [Erythranthe guttata]                               |

| #ID             | 28 h-1<br>FPKM | 28 h-2<br>FPKM | 28 h-3<br>FPKM | 48 h-1<br>FPKM | 48 h-2<br>FPKM | 48 h-3<br>FPKM | FDR       | log2FC    | regulated | nr_annotation                                                                                 |
|-----------------|----------------|----------------|----------------|----------------|----------------|----------------|-----------|-----------|-----------|-----------------------------------------------------------------------------------------------|
| c33669.graph_c0 | 2.9567702      | 1.9104177      | 2.2798911      | 35.106701      | 35.661387      | 43.016896      | 3.492E-96 | 4.032777  | up        | PREDICTED: protein notum homolog [Sesamum indicum]                                            |
| c33688.graph_c0 | 3.2366468      | 3.3168214      | 3.1433682      | 8.7591135      | 10.052487      | 10.951642      | 1.032E-14 | 1.656813  | up        | PREDICTED: peptidyl-prolyl cis-trans isomerase FKBP62 [Sesamum indicum]                       |
| c33689.graph_c0 | 0.4850995      | 0.2502853      | 0.3958372      | 4.3921378      | 3.7223499      | 4.6115554      | 1.173E-13 | 3.534694  | up        | PREDICTED: mitoferrin-like [Sesamum indicum]                                                  |
| c33690.graph_c0 | 26.499359      | 23.486844      | 23.855584      | 10.315006      | 12.826578      | 10.851753      | 1.199E-11 | -1.079932 | down      | PREDICTED: uncharacterized protein At4g22758 [Sesamum indicum]                                |
| c33700.graph_c0 | 238.26003      | 280.23026      | 253.99598      | 70.73804       | 72.20253       | 74.281884      | 5.263E-30 | -1.788687 | down      | PREDICTED: probable protein phosphatase 2C 55 [Sesamum indicum]                               |
| c33715.graph_c1 | 0.5063712      | 0.653151       | 0.8263895      | 2.4757563      | 1.7485091      | 2.3660918      | 6.663E-05 | 1.776327  | up        | unnamed protein product [Coffea canephora]                                                    |
| c33717.graph_c0 | 0.6956415      | 0.9295867      | 0.5676378      | 3.4212944      | 5.0069674      | 5.6177344      | 6.783E-14 | 2.714383  | up        | PREDICTED: uncharacterized protein LOC105167945 [Sesamum indicum]                             |
| c33724.graph_c0 | 193.13932      | 170.75191      | 188.49324      | 53.949621      | 97.180872      | 115.487        | 5.165E-06 | -1.02035  | down      | PREDICTED: alpha-xylosidase 1-like [Sesamum indicum]                                          |
| c33740.graph_c0 | 1.3979518      | 1.4161486      | 1.0294278      | 0.3457574      | 0.3662881      | 0.4999359      | 0.0004742 | -1.62627  | down      | -                                                                                             |
| c33741.graph_c0 | 12.915104      | 14.382658      | 13.877749      | 6.0220419      | 7.2105825      | 6.5741428      | 2.335E-08 | -1.016329 | down      | PREDICTED: probable protein arginine N-methyltransferase 3 [Sesamum indicum]                  |
| c33756.graph_c0 | 9.557499       | 8.848549       | 8.0165753      | 3.874287       | 3.2574105      | 3.3652383      | 2.176E-07 | -1.286276 | down      | hypothetical protein MIMGU_mgv1a023474mg [Erythranthe guttata]                                |
| c33766.graph_c0 | 10.157691      | 8.9043133      | 9.4353158      | 5.0939959      | 3.9397549      | 3.6149626      | 1.819E-06 | -1.12371  | down      | PREDICTED: NAC domain-containing protein 89-like [Sesamum indicum]                            |
| c33771.graph_c0 | 9.085806       | 9.8864271      | 10.17041       | 27.611097      | 22.211693      | 21.546433      | 1.994E-08 | 1.338971  | up        | PREDICTED: uncharacterized protein LOC105166582 [Sesamum indicum]                             |
| c33774.graph_c1 | 557.12096      | 621.8105       | 659.39554      | 72.538844      | 58.847173      | 48.9852        | 8.19E-90  | -3.301423 | down      | hypothetical protein MIMGU_mgv1a012797mg [Erythranthe guttata]                                |
| c33780.graph_c0 | 13.446097      | 12.030529      | 13.55743       | 2.2914029      | 2.0183404      | 1.832698       | 2.706E-34 | -2.622481 | down      | PREDICTED: homocysteine S-methyltransferase 2 [Sesamum indicum]                               |
| c33792.graph_c0 | 6.7173895      | 8.2225834      | 8.1300338      | 15.886648      | 15.377029      | 15.610446      | 1.535E-05 | 1.065427  | up        | PREDICTED: uncharacterized protein LOC105175481 [Sesamum indicum]                             |
| c33797.graph_c0 | 0.8859336      | 0.5090368      | 0.1971585      | 2.6543308      | 2.1630321      | 2.9976789      | 1.083E-07 | 2.3395    | up        | PREDICTED: probable BOI-related E3 ubiquitin-protein ligase 3 [Sesamum indicum]               |
| c33801.graph_c0 | 2.2380426      | 1.7720358      | 1.7138414      | 9.5144718      | 8.8310595      | 9.0096027      | 9.989E-15 | 2.300273  | up        | PREDICTED: sulfate transporter 3.1-like [Sesamum indicum]                                     |
| c33804.graph_c0 | 0.3887157      | 0.1619879      | 0.0975966      | 5.9127098      | 1.9273228      | 2.0572225      | 0.0087259 | 3.998429  | up        | PREDICTED: uncharacterized protein LOC10595265 [Nelumbo nucifera]                             |
| c33821.graph_c0 | 3.320957       | 2.3425881      | 2.7522155      | 13.286416      | 7.8041526      | 6.8767591      | 0.0050734 | 1.78694   | up        | PREDICTED: ras GTPase-activating protein-binding protein 1-like [Sesamum indicum]             |
| c33845.graph_c0 | 25.871724      | 28.360186      | 27.015631      | 8.3523023      | 9.0111028      | 6.7479178      | 4.783E-19 | -1.709585 | down      | PREDICTED: transcription factor TGA1 [Sesamum indicum]                                        |
| c33851.graph_c0 | 34.078883      | 31.126446      | 35.592208      | 15.677855      | 15.72534       | 12.614417      | 2.145E-08 | -1.151617 | down      | PREDICTED: selenoprotein O-like [Malus domestica]                                             |
| c33853.graph_c0 | 8.9382937      | 10.343805      | 10.169914      | 0.6383068      | 1.014313       | 1.1359231      | 2.23E-12  | -3.367783 | down      | -                                                                                             |
| c33856.graph_c0 | 1.4697628      | 1.2533326      | 1.0660573      | 0.3105054      | 0.3289429      | 0.1227937      | 8.8E-07   | -2.265572 | down      | -                                                                                             |
| c33870.graph_c0 | 0.6347059      | 0.3125891      | 0.5179149      | 7.4968175      | 10.498896      | 8.9483968      | 8.162E-38 | 4.237166  | up        | PREDICTED: non-specific phospholipase C3-like [Sesamum indicum]                               |
| c33873.graph_c0 | 4.4415857      | 4.5270044      | 4.9806299      | 18.789817      | 27.47988       | 24.955665      | 2.964E-22 | 2.387848  | up        | PREDICTED: RING finger and CHY zinc finger domain-containing protein 1-like [Sesamum indicum] |
| c33877.graph_c0 | 50.737753      | 54.873361      | 55.940167      | 151.91658      | 175.95098      | 205.01091      | 4.474E-24 | 1.759819  | up        | hypothetical protein MIMGU_mgv1a007222mg [Erythranthe guttata]                                |

| #ID             | 28 h-1<br>FPKM | 28 h-2<br>FPKM | 28 h-3<br>FPKM | 48 h-1<br>FPKM | 48 h-2<br>FPKM | 48 h-3<br>FPKM | FDR       | log2FC    | regulated | nr_annotation                                                                                       |
|-----------------|----------------|----------------|----------------|----------------|----------------|----------------|-----------|-----------|-----------|-----------------------------------------------------------------------------------------------------|
| c33886.graph_c0 | 0.984142       | 0.9289783      | 0.7665495      | 20.64          | 23.607615      | 22.653959      | 5.982E-62 | 4.682114  | up        | hypothetical protein MIMGU_mgv1a026334mg [Erythranthe guttata]                                      |
| c33887.graph_c0 | 73.485134      | 64.115594      | 70.526747      | 466.46304      | 389.43196      | 472.24342      | 1.812E-41 | 2.717688  | up        | metallothionein class I type 3 [Avicennia marina]                                                   |
| c33905.graph_c0 | 92.645909      | 90.69626       | 89.267462      | 38.190411      | 36.250466      | 32.010665      | 4.694E-20 | -1.312357 | down      | hypothetical protein MIMGU_mgv1a015035mg [Erythranthe guttata]                                      |
| c33918.graph_c0 | 3.6170685      | 3.4551997      | 3.7642298      | 7.8408448      | 9.0103585      | 8.6322333      | 0.0001452 | 1.273323  | up        | PREDICTED: ethylene receptor 2-like [Sesamum indicum]                                               |
| c33924.graph_c0 | 3.5870343      | 3.3164858      | 2.3650085      | 8.5844153      | 10.866735      | 12.655081      | 1.006E-13 | 1.829455  | up        | PREDICTED: F-box protein At2g32560-like [Sesamum indicum]                                           |
| c33945.graph_c0 | 6.9810092      | 7.2036535      | 6.5932632      | 12.305965      | 15.551089      | 15.747473      | 3.7E-10   | 1.107179  | up        | PREDICTED: ethylene receptor 2-like [Sesamum indicum]                                               |
| c33985.graph_c0 | 0.8659434      | 0.8048618      | 1.0183393      | 5.3268167      | 7.7635601      | 4.8833988      | 1.764E-11 | 2.778523  | up        | PREDICTED: PI-PLC X domain-containing protein At5g67130-like isoform X2 [Nicotiana tomentosiformis] |
| c33996.graph_c0 | 100.2461       | 117.33912      | 118.7093       | 10.302917      | 11.408011      | 11.032045      | 5.26E-94  | -3.320071 | down      | PREDICTED: glutaredoxin [Sesamum indicum]                                                           |
| c33996.graph_c1 | 3.9173864      | 4.5476133      | 3.4705457      | 41.285216      | 43.73668       | 63.624088      | 2.583E-18 | 3.676681  | up        | hypothetical protein CICLE_v10010813mg, partial [Citrus clementina]                                 |
| c34006.graph_c0 | 29.022469      | 25.385676      | 27.382426      | 11.137028      | 11.79833       | 9.7817937      | 2.905E-09 | -1.279456 | down      | PREDICTED: uncharacterized protein LOC105150884 [Sesamum indicum]                                   |
| c34011.graph_c0 | 0.2715537      | 0.4903751      | 0.3877748      | 1.9792323      | 2.0967567      | 1.837679       | 1.444E-07 | 2.40528   | up        | PREDICTED: uncharacterized protein LOC105150538 [Sesamum indicum]                                   |
| c34018.graph_c0 | 0.0582215      | 0.0525686      | 0.1425249      | 6.8634078      | 6.2545792      | 3.8086785      | 3.877E-15 | 6.108402  | up        | unnamed protein product [Coffea canephora]                                                          |
| c34036.graph_c0 | 4.4840569      | 4.409612       | 4.5382372      | 9.8917003      | 12.882939      | 14.917592      | 7.071E-11 | 1.52458   | up        | PREDICTED: uncharacterized protein LOC10515890 [Sesamum indicum]                                    |
| c34050.graph_c0 | 7.8659284      | 9.5928289      | 8.1242806      | 25.923673      | 35.768445      | 40.372852      | 5.027E-13 | 2.031737  | up        | PREDICTED: polygalacturonase-1 non-catalytic subunit beta-like [Sesamum indicum]                    |
| c34065.graph_c0 | 2.7450878      | 2.9319515      | 2.8682533      | 0.0424342      | 0.3146769      | 0.0755153      | 9.225E-17 | -4.284937 | down      | PREDICTED: WUSCHEL-related homeobox 9 [Sesamum indicum]                                             |
| c34069.graph_c0 | 83.987543      | 87.871257      | 86.359505      | 24.136365      | 46.179035      | 50.416053      | 7.205E-08 | -1.066407 | down      | PREDICTED: uncharacterized protein LOC105145006 [Sesamum indicum]                                   |
| c34074.graph_c0 | 23.343895      | 22.642961      | 20.442215      | 64.199378      | 59.149463      | 67.48656       | 1.022E-27 | 1.565196  | up        | Phosphoribulokinase family protein [Populus trichocarpa]                                            |
| c34106.graph_c2 | 0.060479       | 0.1092138      | 0.0987008      | 3.1431258      | 6.4158804      | 9.2087598      | 4.491E-08 | 6.155773  | up        | hypothetical protein MIMGU_mgv1a008571mg [Erythranthe guttata]                                      |
| c34112.graph_c0 | 34.745962      | 32.927243      | 31.906806      | 69.980965      | 66.518667      | 75.636405      | 2.972E-14 | 1.133117  | up        | hypothetical protein M569_08891, partial [Genlisea aurea]                                           |
| c34114.graph_c0 | 11.986721      | 11.544411      | 14.345564      | 3.3764559      | 2.8615565      | 1.8026101      | 1.545E-06 | -2.186975 | down      | hypothetical protein PRUPE_ppb013116mg [Prunus persica]                                             |
| c34139.graph_c0 | 0.8774356      | 0.5166796      | 0.6537211      | 1.2572857      | 2.4589693      | 2.3665342      | 0.0003893 | 1.601129  | up        | PREDICTED: hyoscyamine 6-dioxygenase [Sesamum indicum]                                              |
| c34142.graph_c0 | 3.7360452      | 3.4780593      | 3.995347       | 9.2361099      | 10.999816      | 12.30118       | 7.336E-13 | 1.575025  | up        | PREDICTED: probable BOI-related E3 ubiquitin-protein ligase 2 [Sesamum indicum]                     |
| c34147.graph_c0 | 0.0704325      | 0.0635939      | 0.344834       | 3.0354646      | 2.2699106      | 3.7336498      | 1.836E-14 | 4.278428  | up        | PREDICTED: bidirectional sugar transporter SWEET1-like [Sesamum indicum]                            |
| c34149.graph_c0 | 0.1570663      | 0.0945441      | 0.0854432      | 0.5309148      | 1.3123596      | 1.2006955      | 1.136E-05 | 3.202913  | up        | PREDICTED: subtilisin-like protease [Sesamum indicum]                                               |
| c34153.graph_c0 | 4.1427475      | 3.0992818      | 4.2497062      | 8.40198        | 11.92082       | 13.483556      | 4.624E-05 | 1.590967  | up        | -                                                                                                   |
| c34161.graph_c0 | 6.7612429      | 7.1969059      | 6.824693       | 19.65682       | 14.46575       | 11.08899       | 0.0078777 | 1.172243  | up        | PREDICTED: uncharacterized protein LOC105166352 [Sesamum indicum]                                   |
| c34162.graph_c1 | 1.2633277      | 1.2193332      | 1.1730534      | 12.093036      | 11.465647      | 12.774798      | 5.475E-26 | 3.355376  | up        | PREDICTED: serine/threonine-protein kinase Aurora-2 [Sesamum indicum]                               |

| #ID             | 28 h-1<br>FPKM | 28 h-2<br>FPKM | 28 h-3<br>FPKM | 48 h-1<br>FPKM | 48 h-2<br>FPKM | 48 h-3<br>FPKM | FDR       | log2FC    | regulated | nr_annotation                                                                                       |
|-----------------|----------------|----------------|----------------|----------------|----------------|----------------|-----------|-----------|-----------|-----------------------------------------------------------------------------------------------------|
| c34168.graph_c0 | 18.7688        | 17.295049      | 15.92101       | 40.768158      | 32.461478      | 28.403898      | 0.0003976 | 1.015371  | up        | PREDICTED: probable protein phosphatase 2C 34 [Sesamum indicum]                                     |
| c34170.graph_c0 | 205.21889      | 221.28378      | 247.14935      | 81.382845      | 98.327067      | 96.697804      | 1.079E-17 | -1.246758 | down      | hypothetical protein MIMGU_mgv1a014768mg [Erythranthe guttata]                                      |
| c34177.graph_c0 | 15.5552        | 18.263316      | 17.940518      | 2.2991977      | 3.838106       | 4.2776074      | 4.614E-27 | -2.280895 | down      | PREDICTED: cytochrome P450 71D95-like [Sesamum indicum]                                             |
| c34193.graph_c0 | 6.9508256      | 7.9661863      | 6.6680377      | 15.062761      | 15.345113      | 15.238748      | 5.543E-12 | 1.122605  | up        | hypothetical protein MIMGU_mgv1a013779mg [Erythranthe guttata]                                      |
| c34193.graph_c1 | 10.315603      | 9.9600814      | 8.6120706      | 20.104966      | 19.216939      | 20.781154      | 7.811E-06 | 1.09957   | up        | PREDICTED: abscisic acid receptor PYL2 [Sesamum indicum]                                            |
| c34195.graph_c0 | 0.5212359      | 0.5752109      | 0.378066       | 4.2578758      | 8.2436988      | 2.6128498      | 0.0018933 | 3.394441  | up        | ubiquitin-conjugating enzyme e2-16kda, ubiquitin protein ligase [Thalassiosira pseudonana CCMP1335] |
| c34199.graph_c0 | 0.5716277      | 0.6635908      | 0.6330305      | 2.1737405      | 3.1800772      | 2.9473238      | 3.365E-07 | 2.187355  | up        | PREDICTED: (+)-neomenthol dehydrogenase-like [Sesamum indicum]                                      |
| c34208.graph_c0 | 29.074371      | 26.548617      | 27.305498      | 225.01744      | 235.97231      | 321.15913      | 5.571E-25 | 3.275952  | up        | hypothetical protein JCGZ_15938 [Jatropha curcas]                                                   |
| c34215.graph_c0 | 0.141089       | 0.0955426      | 0.2014731      | 1.1624645      | 1.0420302      | 1.3526167      | 1.383E-10 | 3.062034  | up        | PREDICTED: vinorine synthase-like [Sesamum indicum]                                                 |
| c34231.graph_c0 | 33.234704      | 38.158524      | 30.408814      | 13.056326      | 17.561463      | 16.534185      | 3.817E-12 | -1.072969 | down      | PREDICTED: uncharacterized protein LOC105161505 [Sesamum indicum]                                   |
| c34240.graph_c0 | 0.2713276      | 0.4899668      | 0.3874519      | 2.6654398      | 2.0950109      | 2.0656675      | 1.773E-08 | 2.618595  | up        | PREDICTED: MADS-box transcription factor 23 [Sesamum indicum]                                       |
| c34259.graph_c0 | 0.049348       | 0              | 0.080535       | 1.3135954      | 1.5903944      | 2.0593659      | 5.737E-18 | 5.289345  | up        | PREDICTED: pathogenesis-related protein 5 [Sesamum indicum]                                         |
| c34261.graph_c0 | 13.595289      | 15.329947      | 15.541327      | 33.155715      | 34.535547      | 50.771285      | 3.396E-06 | 1.451492  | up        | PREDICTED: kinesin KP1-like isoform X2 [Sesamum indicum]                                            |
| c34267.graph_c0 | 9.7563737      | 10.059982      | 10.79528       | 1.0140876      | 0.7074677      | 0.9463451      | 1.184E-41 | -3.473802 | down      | hypothetical protein MIMGU_mgv1a010327mg [Erythranthe guttata]                                      |
| c34277.graph_c0 | 16.372458      | 13.508416      | 14.511498      | 47.649092      | 49.088541      | 59.537442      | 5.532E-31 | 1.855473  | up        | PREDICTED: long chain acyl-CoA synthetase 6, peroxisomal-like isoform X2 [Sesamum indicum]          |
| c34293.graph_c0 | 0.0673793      | 0.3346046      | 0.3023954      | 1.9643897      | 4.2525451      | 4.9777213      | 5.929E-07 | 4.018685  | up        | PREDICTED: GDSL esterase/lipase At5g45960 [Sesamum indicum]                                         |
| c34294.graph_c1 | 10.134098      | 11.080549      | 10.833883      | 20.515203      | 21.216593      | 21.075644      | 3.278E-10 | 1.012244  | up        | PREDICTED: ABC transporter B family member 19 [Sesamum indicum]                                     |
| c34305.graph_c0 | 4.9345704      | 4.6444737      | 4.5146381      | 13.002676      | 11.365179      | 14.032059      | 4.843E-11 | 1.48898   | up        | PREDICTED: monoacylglycerol lipase abhd6-B [Sesamum indicum]                                        |
| c34311.graph_c1 | 6.0977062      | 6.126808       | 6.7873357      | 1.5458583      | 1.1337573      | 1.0933425      | 1.039E-11 | -2.284431 | down      | PREDICTED: vesicle transport v-SNARE 13-like isoform X2 [Sesamum indicum]                           |
| c34317.graph_c0 | 1.258546       | 1.9155597      | 2.3180027      | 6.8369987      | 6.2772416      | 6.0024067      | 5.957E-08 | 1.843223  | up        | PREDICTED: NAC domain-containing protein 21/22-like [Sesamum indicum]                               |
| c34324.graph_c0 | 104.31714      | 106.1971       | 100.20963      | 44.476316      | 45.810467      | 37.531993      | 6.393E-18 | -1.238235 | down      | PREDICTED: chaperone protein dnaJ 1, mitochondrial-like isoform X1 [Sesamum indicum]                |
| c34331.graph_c0 | 1.6195835      | 1.949776       | 1.8298618      | 0.6843138      | 0.5576519      | 0.6557366      | 0.0011378 | -1.463648 | down      | PREDICTED: putative SNAP25 homologous protein SNAP30 [Sesamum indicum]                              |
| c34335.graph_c0 | 91.497919      | 105.37933      | 104.87268      | 21.867216      | 17.641544      | 17.586422      | 1.273E-50 | -2.355372 | down      | PREDICTED: uncharacterized protein LOC105176201 [Sesamum indicum]                                   |
| c34336.graph_c0 | 68.336125      | 69.388829      | 66.173244      | 22.580574      | 27.611731      | 22.389085      | 5.593E-24 | -1.450203 | down      | PREDICTED: membrane-anchored ubiquitin-fold protein 3 [Sesamum indicum]                             |
| c34337.graph_c0 | 2.0520458      | 3.208516       | 2.9405022      | 9.1356383      | 11.492745      | 11.685202      | 2.002E-10 | 2.016029  | up        | PREDICTED: MLO-like protein 4 [Sesamum indicum]                                                     |

| #ID             | 28 h-1<br>FPKM | 28 h-2<br>FPKM | 28 h-3<br>FPKM | 48 h-1<br>FPKM | 48 h-2<br>FPKM | 48 h-3<br>FPKM | FDR       | log2FC    | regulated | nr_annotation                                                                                     |
|-----------------|----------------|----------------|----------------|----------------|----------------|----------------|-----------|-----------|-----------|---------------------------------------------------------------------------------------------------|
| c34354.graph_c0 | 2.4339862      | 2.924007       | 3.113821       | 19.374366      | 18.696673      | 15.726985      | 4.732E-35 | 2.710991  | up        | PREDICTED: protein NRT1/ PTR FAMILY 5.5-like isoform X2 [Sesamum indicum]                         |
| c34360.graph_c0 | 3.3011696      | 4.4552823      | 3.1757629      | 6.6511138      | 6.999386       | 9.4062852      | 0.0001201 | 1.115708  | up        | PREDICTED: uncharacterized oxidoreductase At1g06690, chloroplastic [Sesamum indicum]              |
| c34364.graph_c0 | 1.5047072      | 1.311761       | 1.5665402      | 0.3288495      | 0.2090257      | 0.2340867      | 2.757E-07 | -2.455124 | down      | unnamed protein product [Coffea canephora]                                                        |
| c34383.graph_c0 | 5.6190887      | 7.4209553      | 6.752232       | 13.926295      | 18.619841      | 23.521842      | 2.24E-06  | 1.537274  | up        | PREDICTED: probable inactive patatin-like protein 9 [Sesamum indicum]                             |
| c34401.graph_c0 | 11.622163      | 8.1249115      | 8.6665743      | 33.078605      | 37.221243      | 38.596157      | 3.86E-43  | 1.977799  | up        | PREDICTED: ABC transporter G family member 28 [Sesamum indicum]                                   |
| c34406.graph_c0 | 0.2871736      | 0.2074327      | 0.2530778      | 0.7280274      | 0.6941311      | 0.466412       | 0.0016119 | 1.382843  | up        | hypothetical protein VITISV_004365 [Vitis vinifera]                                               |
| c34414.graph_c0 | 4.2138621      | 3.9471451      | 4.0268795      | 18.594859      | 14.010194      | 11.106643      | 2.288E-05 | 1.892607  | up        | PREDICTED: ABC transporter G family member 8-like [Sesamum indicum]                               |
| c34445.graph_c0 | 14.565975      | 16.568272      | 16.554441      | 34.615349      | 53.261378      | 59.081483      | 4.708E-07 | 1.657239  | up        | PREDICTED: glycerophosphodiester phosphodiesterase GDPDL3-like [Sesamum indicum]                  |
| c34445.graph_c1 | 9.500661       | 9.2020757      | 9.5848619      | 20.582219      | 35.103481      | 35.718667      | 1.866E-06 | 1.724542  | up        | hypothetical protein MIMGU_mgv1a001772mg [Erythranthe guttata]                                    |
| c34453.graph_c0 | 0.997859       | 0.8509191      | 0.7991662      | 1.7567497      | 2.2829044      | 1.8757744      | 0.0015833 | 1.198379  | up        | PREDICTED: uncharacterized protein DDB_G0290685 [Sesamum indicum]                                 |
| c34456.graph_c1 | 8.0166608      | 8.0920404      | 7.3801874      | 14.95595       | 21.474989      | 18.269127      | 1.165E-08 | 1.256303  | up        | hypothetical protein MIMGU_mgv1a023921mg, partial [Erythranthe guttata]                           |
| c34457.graph_c0 | 2.7897926      | 2.5189212      | 4.433083       | 155.96802      | 160.89144      | 151.3656       | 1.49E-140 | 5.627911  | up        | --                                                                                                |
| c34459.graph_c0 | 57.090983      | 57.535893      | 57.560492      | 117.39801      | 118.07889      | 123.08186      | 2.314E-14 | 1.099896  | up        | PREDICTED: uncharacterized protein LOC105175/11 [Sesamum indicum]                                 |
| c34460.graph_c0 | 0.4967393      | 0.3261884      | 0.9580651      | 11.848937      | 19.222929      | 20.220367      | 1.373E-22 | 4.879274  | up        | PREDICTED: transcription factor bHLH93 [Sesamum indicum]                                          |
| c34472.graph_c0 | 0.0264072      | 0.0238432      | 0.0430961      | 0.6359881      | 1.0992801      | 2.1742412      | 0.0001081 | 5.415111  | up        | PREDICTED: protein NRT1/ PTR FAMILY 6.4 [Sesamum indicum]                                         |
| c34487.graph_c0 | 10.623813      | 11.146922      | 11.8077        | 26.282825      | 26.416857      | 21.485646      | 1.789E-10 | 1.187248  | up        | PREDICTED: SNAP25 homologous protein SNAP35 [Sesamum indicum]                                     |
| c34489.graph_c0 | 4.0845134      | 5.5791802      | 7.3495371      | 24.161301      | 41.628608      | 15.828625      | 0.0044547 | 2.299305  | up        | hypothetical protein PAXINDRAFT_10917 [Paxillus involutus ATCC 200175]                            |
| c34498.graph_c0 | 23.400818      | 24.174913      | 24.893627      | 54.911577      | 66.124441      | 61.9352        | 1.241E-20 | 1.375217  | up        | PREDICTED: cytochrome P450 71D95-like [Sesamum indicum]                                           |
| c34501.graph_c0 | 5.6364736      | 6.4887391      | 5.0592481      | 22.237709      | 16.84077       | 12.396662      | 0.0006225 | 1.633755  | up        | PREDICTED: probable galactinol--sucrose galactosyltransferase 1 [Sesamum indicum]                 |
| c34502.graph_c0 | 0.7827235      | 0.9187437      | 0.8941744      | 5.5560943      | 4.3619525      | 4.6347931      | 9.425E-11 | 2.533682  | up        | PREDICTED: NAC domain-containing protein 12-like [Sesamum indicum]                                |
| c34503.graph_c0 | 0.5672195      | 0.5761643      | 0.3471349      | 3.5650046      | 3.0784785      | 3.4386843      | 1.655E-13 | 2.802788  | up        | hypothetical protein CISIN_1g004365mg [Citrus sinensis]                                           |
| c34508.graph_c0 | 4.2125988      | 3.9883711      | 3.6183644      | 13.100835      | 17.01635       | 17.27397       | 1.733E-32 | 2.040731  | up        | PREDICTED: cellulose synthase-like protein G2 [Sesamum indicum]                                   |
| c34523.graph_c0 | 2.6415065      | 2.7738968      | 2.8583112      | 5.4591915      | 6.1689082      | 5.7642995      | 0.0003131 | 1.112115  | up        | Serine carboxypeptidase-like 40 [Theobroma cacao]                                                 |
| c34529.graph_c0 | 4.2058511      | 5.4032846      | 4.3536612      | 13.891652      | 11.779671      | 12.76731       | 3.161E-13 | 1.506057  | up        | PREDICTED: acetolactate synthase small subunit 1, chloroplastic-like isoform X2 [Sesamum indicum] |
| c34532.graph_c0 | 0.4785318      | 0.8024145      | 0.5020432      | 3.2928318      | 3.1211607      | 5.4743652      | 5.406E-07 | 2.775845  | up        | hypothetical protein MIMGU_mgv1a017766mg, partial [Erythranthe guttata]                           |
| c34533.graph_c0 | 5.1260801      | 4.9550782      | 6.397284       | 50.376163      | 55.230032      | 69.311184      | 4.217E-39 | 3.445979  | up        | PREDICTED: GDSL esterase/lipase At2g40250 [Sesamum indicum]                                       |

| #ID             | 28 h-1<br>FPKM | 28 h-2<br>FPKM | 28 h-3<br>FPKM | 48 h-1<br>FPKM | 48 h-2<br>FPKM | 48 h-3<br>FPKM | FDR       | log2FC    | regulated | nr_annotation                                                                                                     |
|-----------------|----------------|----------------|----------------|----------------|----------------|----------------|-----------|-----------|-----------|-------------------------------------------------------------------------------------------------------------------|
| c34533.graph_c1 | 1.574233       | 0.8122199      | 1.1010525      | 17.103911      | 16.307568      | 24.223507      | 6.196E-22 | 4.08573   | up        | PREDICTED: GDSL esterase/lipase At2g30310-like [Cucumis melo]                                                     |
| c34550.graph_c0 | 0.3725152      | 0.3027117      | 0.3799617      | 0.8027238      | 0.9254228      | 1.2394492      | 0.0003237 | 1.528378  | up        | PREDICTED: cell division control protein 45 homolog [Sesamum indicum]                                             |
| c34563.graph_c0 | 12.780832      | 14.231646      | 13.247067      | 26.845181      | 27.507756      | 32.858751      | 1.058E-15 | 1.155404  | up        | PREDICTED: rho guanine nucleotide exchange factor 8-like [Sesamum indicum]                                        |
| c34601.graph_c0 | 3.2647526      | 3.1320008      | 2.9970129      | 12.285621      | 11.302609      | 8.1124509      | 1.267E-07 | 1.8014    | up        | PREDICTED: uncharacterized protein LOC105178555 [Sesamum indicum]                                                 |
| c34613.graph_c0 | 6137.9993      | 6406.6292      | 6827.4128      | 1309.8043      | 1381.2781      | 1122.9639      | 1.603E-08 | -2.301914 | down      | hypothetical protein MIMGU_mgv1a024110mg [Erythranthe guttata]                                                    |
| c34616.graph_c0 | 0.3931247      | 0.2615456      | 0.236369       | 1.022856       | 0.9724543      | 0.8634578      | 7.397E-05 | 1.726208  | up        | Cysteine-rich KLK (RECEPTOR-like protein kinase) 8 [1 neobroma cacaon]                                            |
| c34619.graph_c1 | 2.5414073      | 2.9830483      | 2.2811444      | 8.7622651      | 7.7809672      | 4.8728817      | 0.000835  | 1.504924  | up        | PREDICTED: uncharacterized protein LOC105177084 [Sesamum indicum]                                                 |
| c34624.graph_c0 | 1.0494794      | 1.6244254      | 1.2845499      | 2.8506267      | 3.1205564      | 2.8746665      | 0.0072607 | 1.201505  | up        | PREDICTED: zinc finger Ran-binding domain-containing protein 2-like isoform X2 [Sesamum indicum]                  |
| c34632.graph_c0 | 8.4765794      | 11.172433      | 11.210018      | 3.2933912      | 4.6228569      | 4.798595       | 2.228E-06 | -1.243649 | down      | PREDICTED: exocyst complex component EXO70A1-like [Sesamum indicum]                                               |
| c34632.graph_c2 | 5.2683748      | 4.636422       | 4.2989508      | 13.187042      | 13.790968      | 13.990241      | 4.276E-07 | 1.569516  | up        | PREDICTED: cyclin-D3-1 [Sesamum indicum]                                                                          |
| c34640.graph_c0 | 25.51132       | 27.082204      | 22.907442      | 50.535765      | 50.741436      | 56.162878      | 4.474E-12 | 1.101686  | up        | PREDICTED: 50S ribosomal protein L24, chloroplastic [Sesamum indicum]                                             |
| c34644.graph_c0 | 6.1405686      | 5.3294602      | 6.8750832      | 24.376618      | 26.335439      | 33.233203      | 6.107E-23 | 2.232259  | up        | PREDICTED: cytokinin riboside 5&#x2013;monophosphate phosphoribohydrolase LOG3-like isoform X1 [Nicotiana glauca] |
| c34647.graph_c0 | 21.672217      | 18.948509      | 25.291587      | 74.330639      | 98.254243      | 119.57814      | 6.034E-12 | 2.183051  | up        | PREDICTED: probable pectinesterase 15 [Sesamum indicum]                                                           |
| c34662.graph_c0 | 3.2279073      | 3.5719032      | 2.7923789      | 8.1524566      | 9.0602185      | 9.0332916      | 1.31E-09  | 1.492687  | up        | PREDICTED: probable GABA transporter 2 [Sesamum indicum]                                                          |
| c34678.graph_c0 | 25.448598      | 22.075003      | 25.512328      | 8.064493       | 10.496119      | 12.506285      | 2.676E-05 | -1.197644 | down      | -                                                                                                                 |
| c34685.graph_c0 | 0.1469088      | 0.2321286      | 0.2697219      | 0.9776433      | 0.937057       | 0.911325       | 1.56E-06  | 2.165899  | up        | PREDICTED: uncharacterized protein LOC105169662 [Sesamum indicum]                                                 |
| c34687.graph_c0 | 66.924947      | 72.160036      | 77.466332      | 19.739739      | 19.601944      | 17.917944      | 2.432E-37 | -1.876208 | down      | PREDICTED: probable fructokinase-7 [Sesamum indicum]                                                              |
| c34693.graph_c0 | 53.318069      | 56.223319      | 53.748746      | 149.1054       | 116.04571      | 115.15892      | 4.475E-07 | 1.267158  | up        | PREDICTED: sterol 14-demethylase-like [Sesamum indicum]                                                           |
| c34705.graph_c0 | 0.0824481      | 0.0744429      | 0.1569795      | 0.9754172      | 1.0333362      | 0.6509403      | 1.714E-10 | 3.126244  | up        | PREDICTED: abscisic acid 8&#x2013;hydroxylase 4 [Sesamum indicum]                                                 |
| c34730.graph_c0 | 13.619301      | 17.69137       | 14.625441      | 31.106814      | 34.161632      | 32.207232      | 2.2E-12   | 1.126528  | up        | PREDICTED: methylsterol monooxygenase 2-2 [Sesamum indicum]                                                       |
| c34731.graph_c0 | 1.9332004      | 1.4624449      | 1.8332826      | 0.2649161      | 0.561293       | 0.2946509      | 2.865E-06 | -2.189646 | down      | hypothetical protein MIMGU_mgv1a016001mg [Erythranthe guttata]                                                    |
| c34735.graph_c0 | 7.5357785      | 6.6952358      | 8.1660496      | 2.9802721      | 3.4001013      | 3.7397578      | 0.0029274 | -1.107599 | down      | PREDICTED: peroxisomal membrane protein 13 [Glycine max]                                                          |
| c34743.graph_c0 | 3.5507001      | 2.9053915      | 3.7122198      | 0.351623       | 0.5215026      | 0.4380208      | 8.742E-10 | -2.919469 | down      | PREDICTED: uncharacterized protein LOC105168020 [Sesamum indicum]                                                 |
| c34762.graph_c0 | 7.2149279      | 6.3321823      | 5.7226419      | 12.343163      | 12.669574      | 12.576242      | 0.0003148 | 1.005844  | up        | TPA: hypothetical protein ZEAMMB73_114394 [Zea mays]                                                              |
| c34789.graph_c0 | 2.9633279      | 3.4400665      | 3.1089232      | 1.1805314      | 1.3643235      | 0.8594425      | 0.0012852 | -1.439495 | down      | -                                                                                                                 |
| c34792.graph_c0 | 2.4006588      | 2.256648       | 3.9446705      | 0.6669615      | 0.6624045      | 1.4465547      | 0.0037419 | -1.59781  | down      | unnamed protein product [Coffea canephora]                                                                        |
| c34794.graph_c0 | 54.44811       | 57.574208      | 51.715287      | 182.19993      | 207.09438      | 296.32676      | 7.76E-09  | 2.102809  | up        | hypothetical protein MIMGU_mgv1a016621mg [Erythranthe guttata]                                                    |

| #ID             | 28 h-1<br>FPKM | 28 h-2<br>FPKM | 28 h-3<br>FPKM | 48 h-1<br>FPKM | 48 h-2<br>FPKM | 48 h-3<br>FPKM | FDR       | log2FC    | regulated | nr_annotation                                                                                          |
|-----------------|----------------|----------------|----------------|----------------|----------------|----------------|-----------|-----------|-----------|--------------------------------------------------------------------------------------------------------|
| c34806.graph_c0 | 0.0342557      | 0.0309297      | 0.0279524      | 1.215807       | 2.5760001      | 3.2068169      | 2.611E-09 | 6.259953  | up        | PREDICTED: O-acyltransferase WSD1-like [Sesamum indicum]                                               |
| c34819.graph_c0 | 0.8837088      | 1.1018704      | 0.6867611      | 1.5468958      | 1.8082743      | 2.8952253      | 0.0047824 | 1.261755  | up        | PREDICTED: uncharacterized protein LOC105178720 [Sesamum indicum]                                      |
| c34821.graph_c0 | 99.499347      | 106.24235      | 107.97082      | 18.736822      | 21.904284      | 18.214247      | 7.046E-59 | -2.373659 | down      | PREDICTED: protein lin-12 [Sesamum indicum]                                                            |
| c34834.graph_c0 | 3.962405       | 4.1739603      | 3.6524204      | 29.391746      | 33.534671      | 39.422009      | 6.081E-51 | 3.15647   | up        | PREDICTED: allene oxide synthase, chloroplastic [Sesamum indicum]                                      |
| c34847.graph_c0 | 57.415185      | 57.101795      | 61.260812      | 19.839372      | 29.135951      | 27.141136      | 5.427E-16 | -1.17203  | down      | PREDICTED: DNA-directed RNA polymerase III subunit RPC5 [Sesamum indicum]                              |
| c34849.graph_c0 | 3.1561673      | 2.2740215      | 2.6664565      | 9.2944964      | 16.374978      | 18.356219      | 2.978E-07 | 2.474139  | up        | PREDICTED: uncharacterized protein LOC10517410 [Sesamum indicum]                                       |
| c34854.graph_c0 | 60.119651      | 64.041484      | 58.620631      | 132.98925      | 213.45655      | 276.61632      | 0.0001318 | 1.801219  | up        | chalcone isomerase [Camellia nitidissima]                                                              |
| c34858.graph_c0 | 17.68392       | 17.378362      | 19.851125      | 46.627073      | 45.787808      | 47.108443      | 3.913E-17 | 1.387298  | up        | PREDICTED: rac-like GTP-binding protein 5 isoform X2 [Sesamum indicum]                                 |
| c34859.graph_c0 | 0.0892366      | 0.0805723      | 0.0364082      | 3.6762036      | 4.3738141      | 6.2401834      | 2.872E-21 | 6.151692  | up        | hypothetical protein MIMGU_mgv1a004092mg [Erythranthe guttata]                                         |
| c34859.graph_c1 | 0              | 0.0882364      | 0.2392281      | 2.6013431      | 5.3803863      | 4.7395409      | 1.997E-11 | 5.307723  | up        | PREDICTED: cytochrome P450 78A9-like, partial [Cucumis melo]                                           |
| c34867.graph_c0 | 1.4274417      | 1.398535       | 1.1399982      | 0.3079808      | 0.3262684      | 0.8563734      | 0.0036751 | -1.379257 | down      | PREDICTED: pentatricopeptide repeat-containing protein At3g03580 [Sesamum indicum]                     |
| c34868.graph_c0 | 87.823126      | 77.611727      | 85.723153      | 225.81809      | 230.78901      | 251.26136      | 4.185E-26 | 1.53571   | up        | hypothetical protein VITISV_041718 [Vitis vinifera]                                                    |
| c34872.graph_c0 | 10.8707        | 9.0843022      | 11.481195      | 1.6124845      | 1.811761       | 1.999995       | 7.391E-16 | -2.496246 | down      | PREDICTED: polyol transporter 5-like [Sesamum indicum]                                                 |
| c34900.graph_c0 | 9.9152868      | 9.7936303      | 9.0535805      | 26.501127      | 34.023238      | 38.172464      | 1.952E-17 | 1.815472  | up        | PREDICTED: sulfate transporter 3.1 [Sesamum indicum]                                                   |
| c34901.graph_c0 | 0.4537814      | 0.4682538      | 0.4760768      | 2.382977       | 2.1762717      | 2.1203586      | 3.891E-07 | 2.300443  | up        | PREDICTED: stress enhanced protein 2, chloroplastic [Sesamum indicum]                                  |
| c34902.graph_c0 | 457.86811      | 550.11184      | 547.0116       | 73.330181      | 65.273873      | 64.850896      | 2.755E-67 | -2.889596 | down      | PREDICTED: desiccation-related protein PCC3-06 isoform X2 [Sesamum indicum]                            |
| c34907.graph_c1 | 0.1999122      | 0.361004       | 0.3262535      | 12.036666      | 11.543361      | 9.9209835      | 2.767E-50 | 5.283254  | up        | PREDICTED: ethylene-responsive transcription factor RAP2-12-like [Sesamum indicum]                     |
| c34919.graph_c0 | 2.7159951      | 2.4120875      | 2.9791942      | 0              | 0.0597893      | 0.0502183      | 3.636E-19 | -6.192037 | down      | PREDICTED: 3-oxoacyl-[acyl-carrier-protein] reductase, chloroplastic-like isoform X2 [Sesamum indicum] |
| c34938.graph_c0 | 24.705253      | 25.60798       | 27.009908      | 12.85256       | 12.307456      | 12.304354      | 4.001E-12 | -1.002473 | down      | unnamed protein product [Coffea canephora]                                                             |
| c34942.graph_c0 | 1.7048467      | 1.6419378      | 1.391141       | 0.3601698      | 0.8394237      | 0.6409538      | 0.0037807 | -1.334401 | down      | -                                                                                                      |
| c34943.graph_c0 | 4.6683693      | 8.3992062      | 5.2658679      | 1.0877761      | 2.1203551      | 2.0906567      | 0.0005618 | -1.759249 | down      | PREDICTED: uncharacterized protein LOC104095569 [Nicotiana tomentosiformis]                            |
| c34951.graph_c0 | 0.423119       | 0.3502004      | 0.4603489      | 2.1006436      | 3.36174        | 3.4598975      | 2.273E-11 | 2.887468  | up        | PREDICTED: uncharacterized protein LOC105174266 [Sesamum indicum]                                      |
| c34953.graph_c0 | 28.078187      | 41.643989      | 27.651897      | 95.839547      | 69.617454      | 54.700671      | 0.0083732 | 1.228552  | up        | -                                                                                                      |
| c34966.graph_c0 | 17.566347      | 39.06009       | 20.538262      | 551.68088      | 619.64617      | 490.88233      | 2.718E-85 | 4.471879  | up        | -                                                                                                      |
| c34990.graph_c0 | 4.6674789      | 3.1926483      | 2.7699088      | 24.561913      | 34.567205      | 30.469439      | 1.348E-19 | 3.112282  | up        | PREDICTED: nuclear valosin-containing protein-like [Sesamum indicum]                                   |
| c34990.graph_c1 | 5.3142921      | 4.3838357      | 4.235572       | 25.512733      | 40.565178      | 42.634214      | 1.14E-14  | 2.997355  | up        | PREDICTED: nuclear valosin-containing protein-like [Sesamum indicum]                                   |

| #ID             | 28 h-1<br>FPKM | 28 h-2<br>FPKM | 28 h-3<br>FPKM | 48 h-1<br>FPKM | 48 h-2<br>FPKM | 48 h-3<br>FPKM | FDR       | log2FC    | regulated | nr_annotation                                                                                 |
|-----------------|----------------|----------------|----------------|----------------|----------------|----------------|-----------|-----------|-----------|-----------------------------------------------------------------------------------------------|
| c35007.graph_c0 | 11.983142      | 13.975386      | 11.272029      | 1.2657929      | 6.0342935      | 3.7543164      | 5.349E-05 | -1.729745 | down      | PREDICTED: LOW QUALITY PROTEIN: piriformospora indica-insensitive protein 2 [Sesamum indicum] |
| c35007.graph_c1 | 6.4253013      | 6.3391395      | 7.0332838      | 1.668638       | 2.693668       | 2.7927329      | 5.463E-06 | -1.435222 | down      | PREDICTED: LOW QUALITY PROTEIN: piriformospora indica-insensitive protein 2 [Sesamum indicum] |
| c35027.graph_c0 | 1.5205343      | 1.0751626      | 1.749          | 0.208994       | 0.1968034      | 0.103312       | 3.068E-11 | -3.045664 | down      | PREDICTED: uncharacterized protein LOC104748542 [Cameina sativa]                              |
| c35028.graph_c0 | 2.0973201      | 2.1451882      | 2.6473158      | 9.6163207      | 12.761661      | 12.899499      | 8.581E-33 | 2.392573  | up        | PREDICTED: subtilisin-like protease [Sesamum indicum]                                         |
| c35040.graph_c0 | 3.9223446      | 4.3587808      | 5.0717218      | 8.872859       | 8.9135259      | 8.4395005      | 0.0037818 | 1.016074  | up        | PREDICTED: serine/threonine-protein kinase tricornet [Sesamum indicum]                        |
| c35065.graph_c0 | 2.9894418      | 2.7180611      | 3.0022894      | 10.414054      | 14.31689       | 15.585409      | 9.616E-18 | 2.246069  | up        | PREDICTED: cytokinin dehydrogenase 7 [Sesamum indicum]                                        |
| c35067.graph_c0 | 25.642938      | 28.338513      | 25.370868      | 10.496184      | 14.060704      | 13.738017      | 4.787E-10 | -1.014108 | down      | PREDICTED: nuclear transcription factor Y subunit A-1-like [Sesamum indicum]                  |
| c35074.graph_c0 | 4.4365122      | 4.6449707      | 3.5431331      | 12.683026      | 12.897416      | 11.072351      | 6.235E-14 | 1.581214  | up        | PREDICTED: protease Do-like 1, chloroplastic isoform X2 [Cucumis melo]                        |
| c35094.graph_c0 | 18.941739      | 13.617553      | 16.272864      | 31.439574      | 34.842159      | 37.487769      | 5.047E-08 | 1.126773  | up        | PREDICTED: zeatin O-glucosyltransferase-like [Sesamum indicum]                                |
| c35097.graph_c0 | 5.2718929      | 8.0478773      | 8.2932023      | 0.6200269      | 1.0947389      | 0.7968946      | 7.704E-13 | -3.071306 | down      | PREDICTED: B3 domain-containing transcription factor FUS3-like isoform X2 [Sesamum indicum]   |
| c35104.graph_c1 | 0.1247791      | 0.3379914      | 0.6109121      | 4.2704992      | 3.5187258      | 6.7553147      | 6.441E-08 | 3.797887  | up        | PREDICTED: uncharacterized protein LOC102597052 [Solanum tuberosum]                           |
| c35122.graph_c0 | 19.251347      | 18.375428      | 17.691261      | 7.8436609      | 8.5248367      | 8.4526379      | 1.426E-10 | -1.115522 | down      | PREDICTED: cytochrome P450 82C2 [Sesamum indicum]                                             |
| c35128.graph_c0 | 15.516803      | 10.804929      | 12.054202      | 38.829334      | 51.514824      | 61.2215        | 8.275E-12 | 2.017051  | up        | PREDICTED: anthocyanidin 3-O-glucosyltransferase 2-like [Sesamum indicum]                     |
| c35138.graph_c0 | 187.02551      | 187.82525      | 182.54046      | 693.88849      | 571.69706      | 680.26781      | 2.73E-24  | 1.848107  | up        | hypothetical protein JCGZ_08206 [Jatropha curcas]                                             |
| c35141.graph_c1 | 11.839821      | 11.03371       | 12.532396      | 35.982665      | 26.626023      | 30.408256      | 1.706E-08 | 1.440337  | up        | hypothetical protein MIMGU_mgv1a011475mg [Erythranthe guttata]                                |
| c35155.graph_c0 | 2.5525198      | 2.4733216      | 2.6416448      | 0.4734888      | 0              | 0.2808717      | 1.883E-10 | -3.276086 | down      | PREDICTED: SUN domain-containing protein Z-like [Sesamum indicum]                             |
| c35160.graph_c0 | 0.0583397      | 0.0351168      | 0.1110776      | 0.7394982      | 0.5744997      | 0.7457345      | 7.78E-12  | 3.374902  | up        | PREDICTED: DNA cross-link repair protein SMM1 [Sesamum indicum]                               |
| c35164.graph_c0 | 0.1446515      | 0.1959102      | 0.0885259      | 1.1001389      | 1.4082687      | 1.631495       | 6.723E-12 | 3.307822  | up        | PREDICTED: uncharacterized protein LOC105166066 [Sesamum indicum]                             |
| c35180.graph_c0 | 66.421205      | 70.309313      | 69.54694       | 20.789296      | 22.633814      | 26.133178      | 1.037E-23 | -1.529058 | down      | PREDICTED: protein ABSCISIC ACID-INSENSITIVE 5 [Sesamum indicum]                              |
| c35185.graph_c0 | 2.6937725      | 3.6704471      | 2.6377156      | 0.8070766      | 1.0523075      | 1.6019866      | 0.00258   | -1.344538 | down      | PREDICTED: 40S ribosomal protein S23 [Musa acuminata subsp. malaccensis]                      |
| c35192.graph_c0 | 62.398211      | 65.160109      | 58.652434      | 113.45535      | 123.53221      | 134.04687      | 6.134E-13 | 1.034587  | up        | Triosephosphate isomerase, chloroplastic [Gossypium arboreum]                                 |
| c35195.graph_c0 | 0.6299815      | 1.2893122      | 0.6511424      | 7.3998776      | 8.3468519      | 6.2054102      | 3.035E-17 | 3.137577  | up        | PREDICTED: transcription factor bHLH118-like [Sesamum indicum]                                |
| c35198.graph_c0 | 8.2676529      | 8.3344084      | 10.579483      | 1.4886163      | 1.7977897      | 2.56965        | 1.04E-16  | -2.179474 | down      | PREDICTED: uncharacterized protein LOC105165519 [Sesamum indicum]                             |
| c35200.graph_c0 | 11.037672      | 12.941608      | 10.031103      | 20.09143       | 25.288437      | 27.907365      | 5.093E-08 | 1.14501   | up        | PREDICTED: probable flavin-containing monooxygenase 1 [Sesamum indicum]                       |
| c35206.graph_c0 | 16.518114      | 18.155181      | 19.279583      | 2.0319506      | 2.4333799      | 2.4761978      | 1.032E-32 | -2.919945 | down      | hypothetical protein MIMGU_mgv1a006135mg [Erythranthe guttata]                                |



| #ID             | 28 h-1<br>FPKM | 28 h-2<br>FPKM | 28 h-3<br>FPKM | 48 h-1<br>FPKM | 48 h-2<br>FPKM | 48 h-3<br>FPKM | FDR       | log2FC    | regulated | nr_annotation                                                                                                           |
|-----------------|----------------|----------------|----------------|----------------|----------------|----------------|-----------|-----------|-----------|-------------------------------------------------------------------------------------------------------------------------|
| c35212.graph_c0 | 4.6391277      | 6.4908822      | 5.7504777      | 13.017759      | 17.785296      | 16.016664      | 2.95E-11  | 1.509019  | up        | PREDICTED: cytokinin riboside 5'-monophosphate phosphoribohydrolase LOG8-like [Sesamum indicum]                         |
| c35224.graph_c0 | 39.003129      | 40.298139      | 38.409213      | 16.752828      | 17.327694      | 14.741982      | 3.357E-17 | -1.22673  | down      | PREDICTED: ruvB-like 2 [Sesamum indicum]                                                                                |
| c35243.graph_c0 | 3.1911553      | 3.2040212      | 2.4789667      | 12.846997      | 11.210117      | 13.360373      | 4.584E-21 | 2.119701  | up        | PREDICTED: lycopene epsilon cyclase, chloroplastic [Sesamum indicum]                                                    |
| c35244.graph_c0 | 6.5427996      | 6.9816318      | 6.8677296      | 0.942441       | 2.1166121      | 2.7169937      | 1.616E-08 | -1.792521 | down      | PREDICTED: zinc finger CCCH domain-containing protein 39-like isoform X2 [Sesamum indicum]                              |
| c35247.graph_c0 | 0.4388243      | 0.2311267      | 0.3282373      | 3.3838065      | 3.6829445      | 3.2171161      | 1.415E-14 | 3.406093  | up        | PREDICTED: protein TRANSPARENT TESTA 12-like [Sesamum indicum]                                                          |
| c35275.graph_c0 | 2.068668       | 2.3135414      | 2.1100203      | 6.1979015      | 6.4238738      | 7.2780184      | 2.997E-16 | 1.656471  | up        | PREDICTED: serine/threonine-protein kinase Nek5 [Sesamum indicum]                                                       |
| c35292.graph_c0 | 257.82198      | 252.78009      | 283.87738      | 38.634204      | 34.665662      | 32.782519      | 1.555E-80 | -2.860207 | down      | hypothetical protein MIMGU_mgv1a0189502mg, partial [Erythranthe guttata]                                                |
| c35295.graph_c1 | 2.3383094      | 3.6155569      | 2.5520053      | 4.9276157      | 5.7304575      | 8.6702257      | 0.0020957 | 1.220497  | up        | PREDICTED: ras-related protein RABA6a-like [Sesamum indicum]                                                            |
| c35297.graph_c0 | 2.8945216      | 1.611647       | 2.5193664      | 5.5646793      | 8.0976689      | 8.7602013      | 6.044E-07 | 1.708329  | up        | PREDICTED: MATE efflux family protein 9 [Sesamum indicum]                                                               |
| c35304.graph_c0 | 1.6162921      | 1.5242207      | 1.6119659      | 0.4552821      | 0.627011       | 0.6886823      | 0.0022535 | -1.38875  | down      | PREDICTED: uncharacterized protein LOC10514699 [Sesamum indicum]                                                        |
| c35308.graph_c0 | 98.545567      | 106.67246      | 98.586742      | 20.679086      | 35.456596      | 48.867868      | 8.628E-15 | -1.502139 | down      | PREDICTED: GDP-L-galactose phosphorylase 2-like [Sesamum indicum]                                                       |
| c35346.graph_c0 | 0.5509655      | 0.5685373      | 0.5780357      | 2.1949379      | 3.1708234      | 3.7285357      | 4.831E-08 | 2.455653  | up        | hypothetical protein MIMGU_mgv1a024479mg [Erythranthe guttata]                                                          |
| c35347.graph_c0 | 11.073155      | 8.9495394      | 10.186206      | 3.7324301      | 4.5109665      | 5.3792365      | 0.000174  | -1.112061 | down      | -                                                                                                                       |
| c35357.graph_c0 | 0              | 0.1096835      | 0.1982506      | 9.546927       | 7.0959807      | 10.481485      | 2.836E-33 | 6.503469  | up        | --                                                                                                                      |
| c35359.graph_c0 | 3.1838191      | 4.148287       | 4.834198       | 10.06377       | 12.339018      | 10.31834       | 2.335E-07 | 1.466627  | up        | PREDICTED: sphinganine C(4)-monooxygenase 1-like [Sesamum indicum]                                                      |
| c35370.graph_c0 | 0.5996024      | 0.6590771      | 0.6381791      | 8.8230756      | 11.727483      | 10.555837      | 2.391E-43 | 4.073147  | up        | PREDICTED: protein STICHEL-like 2 [Sesamum indicum]                                                                     |
| c35372.graph_c0 | 5.0774227      | 5.7258678      | 6.4768199      | 13.187248      | 14.33207       | 13.954499      | 3.12E-12  | 1.30359   | up        | PREDICTED: vacuolar amino acid transporter 1 isoform X2 [Sesamum indicum]                                               |
| c35374.graph_c0 | 2.8799527      | 2.266952       | 2.289761       | 6.3650654      | 7.6850538      | 8.8701922      | 6.955E-08 | 1.661293  | up        | PREDICTED: mitogen-activated protein kinase 19 isoform X2 [Sesamum indicum]                                             |
| c35376.graph_c0 | 1.4019808      | 0.8190841      | 1.4804769      | 6.1676306      | 9.7454134      | 10.045685      | 5.627E-12 | 2.842801  | up        | PREDICTED: uncharacterized protein LOC105165561 [Sesamum indicum]                                                       |
| c35381.graph_c0 | 0.1964202      | 0.3063302      | 0.2477013      | 2.0144511      | 1.5825663      | 2.3160825      | 2.852E-13 | 3.02169   | up        | PREDICTED: uncharacterized protein LOC105165555 [Sesamum indicum]                                                       |
| c35381.graph_c1 | 0.3893533      | 0.2163382      | 0.3177091      | 1.746351       | 1.6489551      | 2.1281573      | 2.739E-09 | 2.620986  | up        | PREDICTED: uncharacterized protein LOC105165555 [Sesamum indicum]                                                       |
| c35382.graph_c0 | 0.7501702      | 0.6956397      | 0.6948534      | 4.548881       | 5.6085395      | 8.0036635      | 3.825E-11 | 3.11998   | up        | PREDICTED: bidirectional sugar transporter SWEET5B [Sesamum indicum]                                                    |
| c35387.graph_c0 | 8.5123329      | 8.6856224      | 7.9060096      | 25.220549      | 17.88952       | 15.650223      | 0.0015383 | 1.277588  | up        | PREDICTED: transcription factor bHLH121 [Sesamum indicum]                                                               |
| c35410.graph_c0 | 0.0696211      | 0.0419075      | 0.0378735      | 0.9119152      | 0.5921035      | 0.8637661      | 4.12E-14  | 4.033644  | up        | PREDICTED: serine/threonine protein phosphatase 2A 51 kDa regulatory subunit B&beta; isoform-like [Nicotiana glauca]    |
| c35413.graph_c0 | 0.8275783      | 0.8621834      | 0.9869728      | 2.1787266      | 2.2226116      | 2.4412224      | 0.0016206 | 1.394749  | up        | PREDICTED: inositol hexakisphosphate and diphosphoinositol-pentakisphosphate kinase 2-like isoform X2 [Sesamum indicum] |

| #ID             | 28 h-1<br>FPKM | 28 h-2<br>FPKM | 28 h-3<br>FPKM | 48 h-1<br>FPKM | 48 h-2<br>FPKM | 48 h-3<br>FPKM | FDR       | log2FC    | regulated | nr_annotation                                                                                        |
|-----------------|----------------|----------------|----------------|----------------|----------------|----------------|-----------|-----------|-----------|------------------------------------------------------------------------------------------------------|
| c35415.graph_c0 | 1.749718       | 2.1327723      | 1.8560823      | 4.71303        | 4.5229653      | 4.2429625      | 0.0010028 | 1.275685  | up        | hypothetical protein MIMGU_mgv1a019839mg, partial [Erythranthe guttata]                              |
| c35424.graph_c0 | 4.2977703      | 4.2801347      | 4.7536005      | 1.2669164      | 1.4763587      | 1.8680881      | 3.917E-08 | -1.494519 | down      | PREDICTED: transcription factor bHLH13-like [Sesamum indicum]                                        |
| c35476.graph_c0 | 1.9135843      | 1.3943546      | 1.7258344      | 0.5532091      | 1.0368718      | 0.6058365      | 0.0084407 | -1.162972 | down      | hypothetical protein MIMGU_mgv1a012316mg [Erythranthe guttata]                                       |
| c35493.graph_c0 | 0              | 0.0194217      | 0              | 1.3360237      | 1.1553919      | 1.6497436      | 4.674E-25 | 7.78266   | up        | PREDICTED: probable inactive purple acid phosphatase 27 isoform X1 [Sesamum indicum]                 |
| c35495.graph_c0 | 10.257668      | 9.4575204      | 13.130378      | 1.7593031      | 2.6209242      | 2.2258278      | 1.351E-15 | -2.278462 | down      | PREDICTED: CBL-interacting protein kinase 18-like [Sesamum indicum]                                  |
| c35503.graph_c0 | 20.743341      | 18.783035      | 18.286337      | 4.7532393      | 8.0327906      | 8.8280411      | 1.512E-12 | -1.387202 | down      | hypothetical protein MIMGU_mgv1a013110mg [Erythranthe guttata]                                       |
| c35510.graph_c0 | 10.985052      | 14.561161      | 10.870885      | 3.2588933      | 5.6493856      | 6.5903265      | 0.0026248 | -1.200608 | down      | PREDICTED: beta-glucosidase 24-like [Sesamum indicum]                                                |
| c35510.graph_c1 | 26.090285      | 26.561004      | 21.241832      | 83.455239      | 90.918811      | 110.20199      | 3.642E-27 | 1.984499  | up        | PREDICTED: NADPH--cytochrome P450 reductase-like [Sesamum indicum]                                   |
| c35517.graph_c0 | 7.0622619      | 6.8561345      | 7.2877092      | 3.092034       | 3.011471       | 3.7053438      | 1.454E-05 | -1.07163  | down      | PREDICTED: putative lysine-specific demethylase JMJ16 isoform X1 [Sesamum indicum]                   |
| c35535.graph_c0 | 0.8198599      | 0.5978995      | 0.9005755      | 3.5573737      | 3.5145427      | 5.6549148      | 2.61E-08  | 2.49405   | up        | PREDICTED: peregrin [Sesamum indicum]                                                                |
| c35540.graph_c0 | 9.6644972      | 11.496336      | 12.267346      | 3.4353147      | 2.677975       | 3.6334625      | 3.848E-08 | -1.734004 | down      | PREDICTED: ras-related protein RABC2a-like [Sesamum indicum]                                         |
| c35549.graph_c0 | 7.530832       | 9.0928455      | 5.7595227      | 37.771754      | 38.428286      | 38.538855      | 1.633E-50 | 2.400388  | up        | allene oxide cyclase [Salvia miltiorrhiza]                                                           |
| c35552.graph_c0 | 2.0468251      | 1.8095892      | 1.5310098      | 0.0540521      | 0.2863083      | 0.4328572      | 2.415E-08 | -2.781127 | down      | PREDICTED: probable glycosyltransferase At5g07620 [Sesamum indicum]                                  |
| c35552.graph_c1 | 4.5195173      | 3.5079705      | 5.3053845      | 0.6030338      | 1.81005        | 0.7154345      | 3.478E-06 | -2.063839 | down      | hypothetical protein MIMGU_mgv1a009597mg [Erythranthe guttata]                                       |
| c35583.graph_c0 | 76.960639      | 90.055163      | 109.89869      | 235.47343      | 170.46129      | 153.40065      | 0.0051843 | 1.063689  | up        | PREDICTED: probable xyloglucan endotransglucosylase/hydrolase protein 23 [Nicotiana tomentosiformis] |
| c35583.graph_c1 | 46.686866      | 53.992349      | 64.39341       | 140.10366      | 99.222808      | 93.56665       | 0.0042711 | 1.061459  | up        | PREDICTED: probable xyloglucan endotransglucosylase/hydrolase protein 25 [Prunus mume]               |
| c35586.graph_c0 | 6.7188489      | 5.9966001      | 5.7604419      | 25.78539       | 34.447056      | 45.590535      | 7.056E-10 | 2.552557  | up        | PREDICTED: probable galactinol--sucrose galactosyltransferase 6 [Sesamum indicum]                    |
| c35595.graph_c0 | 628.63883      | 666.75996      | 702.63832      | 80.17062       | 77.420462      | 64.55094       | 1.634E-74 | -3.124754 | down      | PREDICTED: cysteine proteinase 15A [Nicotiana tomentosiformis]                                       |
| c35626.graph_c0 | 0.8768406      | 1.0701066      | 1.1636618      | 0.2687046      | 0.2587818      | 0.3586376      | 8.27E-06  | -1.771911 | down      | PREDICTED: phosphatidylinositol/phosphatidylcholine transfer protein SFH2 [Sesamum indicum]          |
| c35641.graph_c0 | 0.1868631      | 0              | 0.0381197      | 5.507059       | 5.2067429      | 4.2678708      | 1.436E-27 | 6.101628  | up        | -                                                                                                    |
| c35651.graph_c0 | 1.4278708      | 1.0385491      | 1.5211431      | 6.0833804      | 10.705499      | 17.044099      | 0.0002301 | 3.113389  | up        | PREDICTED: uncharacterized protein LOC105111537 [Sesamum indicum]                                    |
| c35664.graph_c0 | 5.3044575      | 5.682372       | 5.7222836      | 1.8234008      | 2.1731311      | 1.1154351      | 0.0001041 | -1.665259 | down      | hypothetical protein L484_005397 [Morus notabilis]                                                   |
| c35671.graph_c0 | 0.7130027      | 0.5211509      | 0.7064768      | 1.8290856      | 1.8465088      | 1.5126263      | 0.0001874 | 1.461868  | up        | PREDICTED: E3 ubiquitin-protein ligase ORTHRUS 2-like [Sesamum indicum]                              |
| c35683.graph_c0 | 2.786841       | 2.3710875      | 2.1865765      | 0.679332       | 0.5757359      | 0.4231259      | 5.657E-06 | -2.081458 | down      | -                                                                                                    |
| c35685.graph_c0 | 30.530956      | 39.321521      | 45.322627      | 234.4436       | 245.75171      | 260.15961      | 2.512E-71 | 2.724821  | up        | hypothetical protein POPTR_0014s02030g [Populus trichocarpa]                                         |

| #ID             | 28 h-1<br>FPKM | 28 h-2<br>FPKM | 28 h-3<br>FPKM | 48 h-1<br>FPKM | 48 h-2<br>FPKM | 48 h-3<br>FPKM | FDR       | log2FC    | regulated | nr_annotation                                                                                     |
|-----------------|----------------|----------------|----------------|----------------|----------------|----------------|-----------|-----------|-----------|---------------------------------------------------------------------------------------------------|
| c35719.graph_c0 | 4.797952       | 6.1043239      | 4.5379448      | 0.6911088      | 0.8785752      | 0.4919556      | 3.613E-09 | -2.862727 | down      | -                                                                                                 |
| c35732.graph_c0 | 0.5857235      | 0.6114868      | 0.5675604      | 0.1392089      | 0.1966333      | 0.3303128      | 0.0034759 | -1.373635 | down      | PREDICTED: zinc finger BED domain-containing protein DAYSLEEPER-like isoform X1 [Sesamum indicum] |
| c35738.graph_c0 | 19.166604      | 21.985234      | 19.762526      | 8.8420876      | 9.9361503      | 9.8529278      | 3.853E-08 | -1.049075 | down      | PREDICTED: F-box/FBD/LRR-repeat protein At1g13570-like [Sesamum indicum]                          |
| c35742.graph_c0 | 0.7864911      | 1.1744419      | 1.0120224      | 2.8374313      | 2.3966075      | 3.6165042      | 3.424E-05 | 1.615625  | up        | PREDICTED: thiol-disulfide oxidoreductase L101-like [Sesamum indicum]                             |
| c35746.graph_c0 | 6.2332633      | 7.0612831      | 6.2867833      | 19.335661      | 26.046645      | 21.178442      | 1.837E-18 | 1.803435  | up        | PREDICTED: probable pectinesterase/pectinesterase inhibitor 61 [Sesamum indicum]                  |
| c35752.graph_c0 | 8.1051323      | 7.0714945      | 8.3724268      | 29.205445      | 35.382868      | 38.346836      | 4.869E-40 | 2.165556  | up        | PREDICTED: probable galactinol--sucrose galactosyltransferase 6 [Sesamum indicum]                 |
| c35755.graph_c0 | 7.4552273      | 11.276119      | 7.362082       | 1.7455506      | 2.2955576      | 2.1958757      | 2.843E-07 | -2.026726 | down      | PREDICTED: dynein light chain 1, cytoplasmic-like [Nicotiana tomentosiformis]                     |
| c35761.graph_c0 | 1.4866011      | 1.1910207      | 1.3497366      | 0.0796215      | 0.2249316      | 0.3070027      | 1.069E-08 | -2.694987 | down      | PREDICTED: probable leucine-rich repeat receptor-like protein kinase At5g63930 [Sesamum indicum]  |
| c35774.graph_c0 | 1.2489055      | 1.049876       | 1.3705093      | 2.5656809      | 3.5276531      | 5.0515841      | 0.0003282 | 1.635835  | up        | -                                                                                                 |
| c35787.graph_c0 | 0.3657998      | 0.3853301      | 0.4726086      | 1.7774332      | 1.1256915      | 1.5299771      | 1.924E-06 | 1.905128  | up        | PREDICTED: probable LRR receptor-like serine/threonine-protein kinase At4g36180 [Sesamum indicum] |
| c35811.graph_c1 | 0.4603074      | 0.3562409      | 0.2682908      | 0.791857       | 1.1037848      | 1.0383425      | 0.0006754 | 1.47224   | up        | PREDICTED: phosphatidylinositol 4-kinase alpha 1-like [Sesamum indicum]                           |
| c35812.graph_c0 | 926.42889      | 865.54204      | 945.94862      | 285.61313      | 283.01848      | 310.15068      | 3.032E-27 | -1.598129 | down      | -                                                                                                 |
| c35818.graph_c0 | 3.1208962      | 3.4692452      | 4.9396863      | 54.528715      | 33.884943      | 24.498455      | 6.599E-05 | 3.346166  | up        | PREDICTED: probable galactinol--sucrose galactosyltransferase 1 [Sesamum indicum]                 |
| c35844.graph_c0 | 1.9728924      | 2.6098657      | 1.8532157      | 9.3924887      | 9.9502028      | 11.59166       | 3.95E-22  | 2.305246  | up        | PREDICTED: uncharacterized protein LOC105175814 [Sesamum indicum]                                 |
| c35848.graph_c0 | 0.3882218      | 0.175264       | 0.3167858      | 2.3374738      | 2.6066001      | 5.3638756      | 0.0001211 | 3.582561  | up        | -                                                                                                 |
| c35849.graph_c0 | 48.68415       | 46.266381      | 46.230909      | 14.222969      | 13.829933      | 10.966378      | 5.063E-35 | -1.810645 | down      | PREDICTED: cytochrome P450 78A5 [Sesamum indicum]                                                 |
| c35855.graph_c0 | 244.86365      | 221.82958      | 216.79198      | 549.36526      | 577.48789      | 598.76829      | 3.207E-16 | 1.37704   | up        | PREDICTED: cysteine proteinase 3-like [Sesamum indicum]                                           |
| c35883.graph_c0 | 9.7050974      | 10.319634      | 9.4870565      | 15.892589      | 21.433996      | 24.698359      | 2.18E-06  | 1.10716   | up        | PREDICTED: uncharacterized protein LOC105165376 isoform X1 [Sesamum indicum]                      |
| c35887.graph_c0 | 3.3575928      | 2.460939       | 2.1595821      | 5.9583946      | 10.608734      | 15.548811      | 0.0020993 | 2.038922  | up        | PREDICTED: putative UDP-rhamnose:rhamnosyltransferase 1 [Sesamum indicum]                         |
| c35887.graph_c1 | 2.1649296      | 1.4216207      | 1.9271617      | 4.365785       | 10.571474      | 16.537507      | 0.0088249 | 2.538119  | up        | hypothetical protein MIMGU_mgv1a005472mg [Erythranthe guttata]                                    |
| c35893.graph_c2 | 1.3018305      | 0.685668       | 0.7967123      | 2.612763       | 3.2049433      | 3.7931287      | 2.429E-05 | 1.824163  | up        | hypothetical protein M569_00198, partial [Genlisea aurea]                                         |
| c35894.graph_c0 | 4.1311155      | 4.1615813      | 3.092365       | 1.6012417      | 1.6504749      | 1.6943273      | 0.002715  | -1.160989 | down      | PREDICTED: protein trichome birefringence-like 10 [Sesamum indicum]                               |
| c35916.graph_c0 | 9.2582663      | 8.5078628      | 9.3187043      | 2.3679568      | 4.0389444      | 4.5055212      | 1.615E-12 | -1.27974  | down      | PREDICTED: pentatricopeptide repeat-containing protein At4g19440, chloroplastic [Sesamum indicum] |

| #ID             | 28 h-1<br>FPKM | 28 h-2<br>FPKM | 28 h-3<br>FPKM | 48 h-1<br>FPKM | 48 h-2<br>FPKM | 48 h-3<br>FPKM | FDR       | log2FC    | regulated | nr_annotation                                                                              |
|-----------------|----------------|----------------|----------------|----------------|----------------|----------------|-----------|-----------|-----------|--------------------------------------------------------------------------------------------|
| c35927.graph_c0 | 29.826935      | 29.9292        | 29.467531      | 92.302234      | 97.783025      | 106.34093      | 1.106E-32 | 1.772497  | up        | PREDICTED: cytochrome b5-like [Sesamum indicum]                                            |
| c35936.graph_c0 | 4.154086       | 3.2543273      | 3.3897002      | 32.987498      | 46.595005      | 34.312991      | 1.011E-27 | 3.436672  | up        | -                                                                                          |
| c35944.graph_c0 | 0.5177701      | 0.5843723      | 0.5633283      | 0.1914243      | 0.2317609      | 0.2676585      | 0.0072394 | -1.232123 | down      | PREDICTED: DNA-directed RNA polymerase III subunit RPC5 [Sesamum indicum]                  |
| c35947.graph_c0 | 1.428842       | 0.9460809      | 1.0104669      | 4.4071619      | 4.2851123      | 4.6735282      | 4.228E-07 | 2.023038  | up        | PREDICTED: B3 domain-containing protein At3g19184 isoform X2 [Sesamum indicum]             |
| c35957.graph_c0 | 0.9068258      | 0.8057822      | 0.7634533      | 1.3501694      | 1.7009457      | 1.996876       | 0.0031914 | 1.064257  | up        | PREDICTED: glutamate receptor 3.2-like [Sesamum indicum]                                   |
| c35963.graph_c0 | 311.48976      | 341.0305       | 328.15011      | 528.91683      | 686.3306       | 800.64973      | 7.753E-07 | 1.075668  | up        | tubulin alpha chain-like [Sesamum indicum]                                                 |
| c35981.graph_c0 | 10.865767      | 10.535913      | 10.524004      | 23.234722      | 22.52088       | 19.555156      | 6.02E-07  | 1.076575  | up        | PREDICTED: uncharacterized protein LOC105169411 [Sesamum indicum]                          |
| c35992.graph_c0 | 1.0589181      | 0.6733125      | 0.6815189      | 2.9680888      | 4.065599       | 4.4072532      | 1.891E-14 | 2.280566  | up        | PREDICTED: putative leucine-rich repeat-containing protein DDB_G0290503 [Sesamum indicum]  |
| c35995.graph_c0 | 14.792999      | 16.353385      | 14.918476      | 26.828663      | 34.559379      | 37.519227      | 3.738E-11 | 1.13928   | up        | PREDICTED: LOW QUALITY PROTEIN: interactor of constitutive active ROPs 3 [Sesamum indicum] |
| c35996.graph_c0 | 0.0676657      | 0.0610958      | 0.1183171      | 0.7229288      | 1.1682541      | 1.1883914      | 1.649E-16 | 3.671874  | up        | hypothetical protein VITISV_035665 [Vitis vinifera]                                        |
| c36017.graph_c0 | 0.1135118      | 0.1317735      | 0.1720173      | 2.2815979      | 2.4170764      | 2.5239729      | 1.214E-22 | 4.153492  | up        | PREDICTED: potassium channel AKT2/3 [Sesamum indicum]                                      |
| c36019.graph_c0 | 1.7916031      | 1.9450311      | 1.6881851      | 0.7299607      | 0.8878686      | 0.8419634      | 0.007391  | -1.101989 | down      | PREDICTED: F-box protein SKIP14 [Sesamum indicum]                                          |
| c36031.graph_c0 | 3.6844439      | 2.9940366      | 2.4051809      | 6.5384255      | 6.5968277      | 6.7874937      | 0.0057201 | 1.175155  | up        | VHS domain [Oryza sativa Japonica Group]                                                   |
| c36037.graph_c0 | 18.340198      | 18.395873      | 17.577551      | 59.183739      | 44.577324      | 32.594175      | 0.0029218 | 1.378807  | up        | PREDICTED: ethylene-responsive transcription factor ERF107-like [Sesamum indicum]          |
| c36038.graph_c0 | 0.0520289      | 0.0939544      | 0.0636827      | 0.7254548      | 1.5719961      | 1.7604691      | 1.449E-07 | 4.303751  | up        | PREDICTED: endoglucanase 10-like [Sesamum indicum]                                         |
| c36039.graph_c0 | 14.852247      | 19.581246      | 19.090599      | 2.0825572      | 3.9711904      | 2.2977782      | 1.662E-17 | -2.646161 | down      | floricaula, partial [Salvia coccinea]                                                      |
| c36040.graph_c0 | 7.3995672      | 7.1739846      | 7.6217206      | 1.5376224      | 0.8144622      | 1.8470256      | 4.779E-09 | -2.356221 | down      | CYP72A52v1 [Nicotiana tabacum]                                                             |
| c36060.graph_c0 | 2.7685808      | 3.6157371      | 3.7517849      | 11.092148      | 21.908244      | 24.479152      | 1.038E-05 | 2.533217  | up        | PREDICTED: laccase-14-like [Sesamum indicum]                                               |
| c36070.graph_c1 | 14.9763        | 14.090354      | 13.401515      | 5.2643493      | 4.3939526      | 5.8907192      | 7.981E-10 | -1.4065   | down      | PREDICTED: uncharacterized protein LOC105157576 isoform X2 [Sesamum indicum]               |
| c36078.graph_c0 | 4.1183819      | 3.5325871      | 4.45275        | 1.0440705      | 1.3825826      | 0.2322519      | 2.434E-06 | -2.141121 | down      | PREDICTED: LOB domain-containing protein 18-like [Sesamum indicum]                         |
| c36082.graph_c0 | 31.160519      | 34.73027       | 32.972317      | 10.440935      | 15.495701      | 16.104614      | 9.768E-16 | -1.198931 | down      | PREDICTED: uncharacterized membrane protein At1g75140-like [Sesamum indicum]               |
| c36103.graph_c0 | 2.3197494      | 3.621028       | 4.39537        | 8.5721687      | 10.348314      | 14.811471      | 1.904E-05 | 1.741559  | up        | PREDICTED: proliferating cell nuclear antigen [Sesamum indicum]                            |
| c36129.graph_c0 | 2.4115573      | 3.2798963      | 2.4161731      | 0.154776       | 0.0819832      | 0.2065782      | 3.414E-16 | -4.147699 | down      | PREDICTED: glycerol-3-phosphate dehydrogenase [NAD(+)]-like [Cicer arietinum]              |
| c36136.graph_c0 | 28.914361      | 28.507112      | 27.627675      | 12.177617      | 14.779453      | 14.201962      | 1.759E-07 | -1.008279 | down      | hypothetical protein MIMGU_mgv1a0053871mg, partial [Erythranthe guttata]                   |

| #ID             | 28 h-1<br>FPKM | 28 h-2<br>FPKM | 28 h-3<br>FPKM | 48 h-1<br>FPKM | 48 h-2<br>FPKM | 48 h-3<br>FPKM | FDR       | log2FC    | regulated | nr_annotation                                                                                           |
|-----------------|----------------|----------------|----------------|----------------|----------------|----------------|-----------|-----------|-----------|---------------------------------------------------------------------------------------------------------|
| c36142.graph_c0 | 1.295226       | 1.9647057      | 1.4373757      | 0.3940307      | 1.0435693      | 0.3506061      | 0.0036739 | -1.362194 | down      | PREDICTED: uncharacterized protein LOC105159601 [Sesamum indicum]                                       |
| c36144.graph_c0 | 1.9290566      | 1.2689945      | 1.5066332      | 0.3842491      | 0.8511365      | 0.7459691      | 0.0065082 | -1.21833  | down      | PREDICTED: type I inositol 1,4,5-trisphosphate 5-phosphatase CVP2 isoform X1 [Cucumis melo]             |
| c36156.graph_c0 | 11.336439      | 10.975118      | 10.565967      | 21.635751      | 22.851727      | 26.87109       | 7.311E-13 | 1.157723  | up        | PREDICTED: UDP-glycosyltransferase 90A1-like [Solanum tuberosum]                                        |
| c36162.graph_c0 | 571.3673       | 579.80157      | 619.77934      | 137.81822      | 148.24057      | 152.03363      | 3.323E-29 | -1.974827 | down      | hypothetical protein MIMGU_mgv1a009201mg [Erythranthe guttata]                                          |
| c36188.graph_c0 | 1.4229302      | 1.6118055      | 1.5622065      | 0.9510254      | 0.6948249      | 0.1750793      | 0.0019999 | -1.278163 | down      | PREDICTED: WEB family protein At1g12150-like [Sesamum indicum]                                          |
| c36193.graph_c0 | 33.533538      | 36.002176      | 34.57165       | 72.557676      | 71.741655      | 75.609683      | 7.935E-15 | 1.120803  | up        | PREDICTED: GDSL esterase/lipase At1g54790 [Sesamum indicum]                                             |
| c36202.graph_c0 | 3.8679679      | 2.8993612      | 4.3472604      | 10.73095       | 8.6241066      | 8.0666968      | 0.0002675 | 1.349441  | up        | PREDICTED: NAC domain-containing protein 8-like [Sesamum indicum]                                       |
| c36202.graph_c1 | 4.1139057      | 3.2144462      | 2.7759092      | 8.0225823      | 8.711427       | 6.1569093      | 0.0018128 | 1.223319  | up        | PREDICTED: NAC domain-containing protein 8-like [Sesamum indicum]                                       |
| c36217.graph_c0 | 0.5247014      | 0.7994635      | 0.5084306      | 1.78745        | 1.3651438      | 1.0726373      | 0.0052795 | 1.255749  | up        | hypothetical protein MIMGU_mgv1a009127mg [Erythranthe guttata]                                          |
| c36224.graph_c0 | 1.2392694      | 1.3675983      | 0.5617965      | 5.0616768      | 5.732042       | 4.0379341      | 4.642E-07 | 2.270455  | up        | PREDICTED: laccase-1-like [Sesamum indicum]                                                             |
| c36224.graph_c1 | 0.7812991      | 0.4907408      | 0.6652525      | 3.0141213      | 4.1510249      | 4.2144882      | 8.478E-11 | 2.589992  | up        | PREDICTED: laccase-1-like [Sesamum indicum]                                                             |
| c36234.graph_c0 | 0.4102893      | 0.493937       | 0.6695854      | 3.5249316      | 2.6935484      | 2.416619       | 2.135E-08 | 2.50402   | up        | PREDICTED: high mobility group B protein 6 [Sesamum indicum]                                            |
| c36245.graph_c0 | 3.2774567      | 2.75747        | 3.4037537      | 5.9011617      | 7.4018532      | 9.8295316      | 2.23E-05  | 1.328494  | up        | -                                                                                                       |
| c36254.graph_c1 | 4.1880282      | 3.9282472      | 3.317861       | 1.9069851      | 1.7472169      | 1.6968239      | 0.0088787 | -1.05102  | down      | PREDICTED: pentatricopeptide repeat-containing protein DOT4, chloroplastic isoform X1 [Sesamum indicum] |
| c36255.graph_c0 | 0.5924024      | 0.133721       | 0.3021222      | 2.9661092      | 2.3069559      | 1.7205082      | 2.22E-07  | 2.815048  | up        | hypothetical protein MIMGU_mgv1a018451mg [Erythranthe guttata]                                          |
| c36266.graph_c0 | 209.00085      | 187.4808       | 198.82816      | 529.84794      | 530.12577      | 431.65648      | 1.02E-14  | 1.368933  | up        | PREDICTED: uncharacterized protein LOC105116605 [Sesamum indicum]                                       |
| c36267.graph_c0 | 12.571699      | 12.577502      | 12.121424      | 1.9049398      | 3.0270792      | 4.3352987      | 1.625E-15 | -1.976489 | down      | PREDICTED: transcription factor bHLH30-like isoform X2 [Sesamum indicum]                                |
| c36310.graph_c1 | 2.632122       | 2.0370509      | 2.9367742      | 8.1707964      | 5.337847       | 7.9973581      | 1.657E-05 | 1.545698  | up        | PREDICTED: histone H3-like centromeric protein H1K12 [Sesamum indicum]                                  |
| c36353.graph_c0 | 0.5404572      | 0.5545252      | 0.4410086      | 4.4218108      | 6.2678221      | 5.6800889      | 4.228E-23 | 3.450541  | up        | hypothetical protein MIMGU_mgv1a004476mg [Erythranthe guttata]                                          |
| c36375.graph_c0 | 1.3384621      | 1.176703       | 1.2646227      | 2.6341937      | 3.9967194      | 4.628189       | 2.639E-06 | 1.608097  | up        | PREDICTED: oligopeptide transporter 7 [Sesamum indicum]                                                 |
| c36383.graph_c0 | 1.2745401      | 1.130949       | 1.147602       | 1.559864       | 2.685291       | 3.0733348      | 0.0045267 | 1.074073  | up        | hypothetical protein MIMGU_mgv1a023545mg, partial [Erythranthe guttata]                                 |
| c36388.graph_c0 | 0.335148       | 0.488827       | 0.3576251      | 1.699299       | 2.3887285      | 2.471581       | 2.44E-09  | 2.508961  | up        | PREDICTED: uncharacterized protein LOC105178674 isoform X1 [Sesamum indicum]                            |
| c36389.graph_c0 | 0.5822554      | 1.051444       | 1.0452544      | 9.1518393      | 17.201275      | 13.265619      | 1.279E-12 | 3.919025  | up        | -                                                                                                       |
| c36389.graph_c1 | 2.5610795      | 2.6716247      | 2.7796634      | 4.4755599      | 6.4775685      | 6.3380686      | 7.834E-05 | 1.145132  | up        | PREDICTED: transcription factor MYB3-like [Sesamum indicum]                                             |
| c36394.graph_c0 | 6.3881412      | 5.7159296      | 5.7762031      | 17.143228      | 20.479618      | 17.331073      | 3.779E-10 | 1.659875  | up        | PREDICTED: auxin-induced protein 15A-like [Sesamum indicum]                                             |
| c36402.graph_c0 | 0.5456632      | 1.6188148      | 1.0495338      | 2.6678637      | 1.7795084      | 2.7255304      | 0.006187  | 1.205035  | up        | hypothetical protein MIMGU_mgv1a005987mg [Erythranthe guttata]                                          |
| c36402.graph_c2 | 0.3223872      | 0.2381608      | 0.3826405      | 1.7088982      | 1.1806764      | 1.5205674      | 3.372E-07 | 2.271686  | up        | hypothetical protein MIMGU_mgv1a000547mg [Erythranthe guttata]                                          |

| #ID             | 28 h-1<br>FPKM | 28 h-2<br>FPKM | 28 h-3<br>FPKM | 48 h-1<br>FPKM | 48 h-2<br>FPKM | 48 h-3<br>FPKM | FDR       | log2FC    | regulated | nr_annotation                                                                                                      |
|-----------------|----------------|----------------|----------------|----------------|----------------|----------------|-----------|-----------|-----------|--------------------------------------------------------------------------------------------------------------------|
| c36419.graph_c0 | 0.4345147      | 0.7846521      | 0.7091209      | 1.897129       | 1.7504519      | 1.3068805      | 0.0020481 | 1.407754  | up        | PREDICTED: AP-4 complex subunit epsilon [Sesamum indicum]                                                          |
| c36448.graph_c0 | 2.1790737      | 2.2954158      | 3.4673074      | 4.7416676      | 5.9498356      | 5.3250869      | 0.0028124 | 1.049937  | up        | PREDICTED: LOW QUALITY PROTEIN: protein LOW PSII ACCUMULATION 2, chloroplastic [Sesamum indicum]                   |
| c36451.graph_c0 | 69.043318      | 64.416844      | 75.345923      | 17.066076      | 17.131584      | 12.678982      | 7.798E-48 | -2.110966 | down      | hypothetical protein MIMGU_mgv1a024078mg [Erythranthe guttata]                                                     |
| c36463.graph_c1 | 3.608212       | 4.2976251      | 3.2366105      | 8.1417893      | 7.010154       | 8.3990195      | 1.19E-05  | 1.123651  | up        | PREDICTED: leucine-rich repeat receptor-like serine/threonine/tyrosine-protein kinase SOBIR1 [Sesamum indicum]     |
| c36469.graph_c0 | 10.371874      | 10.499335      | 11.185063      | 3.9817801      | 5.0618558      | 5.0503341      | 4.234E-12 | -1.148029 | down      | PREDICTED: uncharacterized protein LOC10511114 [Sesamum indicum]                                                   |
| c36491.graph_c0 | 76.957226      | 81.410225      | 78.239703      | 232.55558      | 269.49981      | 287.98285      | 8.954E-33 | 1.77825   | up        | acetylajmalan acetyltransferase [Striga asiatica]                                                                  |
| c36499.graph_c0 | 2.0505966      | 1.8355353      | 1.6876948      | 0.739451       | 0.4510247      | 0.657959       | 0.0001016 | -1.543733 | down      | -                                                                                                                  |
| c36504.graph_c0 | 49.522648      | 58.960823      | 57.874368      | 123.66598      | 134.36563      | 131.35751      | 1.237E-17 | 1.267647  | up        | hypothetical protein MIMGU_mgv1a014610mg [Erythranthe guttata]                                                     |
| c36557.graph_c0 | 0.2789198      | 0.1259192      | 0.2275963      | 7.9549066      | 4.9627191      | 6.2131113      | 4.386E-16 | 4.967793  | up        | hypothetical protein MIMGU_mgv1a015689mg [Erythranthe guttata]                                                     |
| c36561.graph_c0 | 206.18175      | 200.14256      | 235.28572      | 108.28789      | 75.903957      | 48.045325      | 2.313E-09 | -1.412903 | down      | hypothetical protein MIMGU_mgv1a011962mg [Erythranthe guttata]                                                     |
| c36600.graph_c0 | 6.9996305      | 5.6078962      | 5.8403544      | 44.737632      | 48.665         | 54.351387      | 1.177E-89 | 3.0412    | up        | hypothetical protein MIMGU_mgv1a021873mg [Erythranthe guttata]                                                     |
| c36606.graph_c0 | 52.931889      | 70.313475      | 78.59344       | 17.101312      | 11.322979      | 10.706873      | 2.323E-13 | -2.315781 | down      | unnamed protein product [Coffea canephora]                                                                         |
| c36617.graph_c0 | 13.084201      | 13.126452      | 10.320715      | 23.956383      | 24.012328      | 25.907437      | 0.0010408 | 1.057802  | up        | predicted Rac-like GTPase ortholog, partial [Nicotiana glauca]                                                     |
| c36628.graph_c0 | 0.1956928      | 0.2061409      | 0.5056651      | 0.6201375      | 0.7664539      | 0.7909056      | 0.0039692 | 1.298853  | up        | hypothetical protein MIMGU_mgv1a001243mg [Erythranthe guttata]                                                     |
| c36638.graph_c0 | 26.968844      | 28.717801      | 28.569106      | 55.717894      | 74.723754      | 79.345565      | 2.66E-12  | 1.352268  | up        | PREDICTED: probable methyltransferase PMT20 [Sesamum indicum]                                                      |
| c36639.graph_c0 | 2.7484208      | 2.8951607      | 2.7027277      | 5.047081       | 9.0374613      | 10.253473      | 0.0003148 | 1.575197  | up        | PREDICTED: B-box zinc finger protein 24 [Sesamum indicum]                                                          |
| c36647.graph_c0 | 0.0491895      | 0              | 0.0401382      | 0.7793917      | 1.2219931      | 1.9417946      | 6.864E-08 | 5.492702  | up        | hypothetical protein MIMGU_mgv1a003330mg [Erythranthe guttata]                                                     |
| c36648.graph_c0 | 45.280017      | 52.599844      | 42.130984      | 139.2594       | 157.35702      | 157.04497      | 5.703E-32 | 1.736237  | up        | candidate cinnamic acid 4-hydroxylase [Capsicum annuum]                                                            |
| c36665.graph_c0 | 7.4316994      | 7.8800988      | 7.6502291      | 13.864641      | 14.790261      | 17.494865      | 3.193E-06 | 1.046549  | up        | PREDICTED: LOW QUALITY PROTEIN: single-stranded DNA-binding protein WHY1, chloroplastic, partial [Sesamum indicum] |
| c36675.graph_c0 | 2.1677651      | 2.1260204      | 1.9823639      | 5.4008519      | 5.1192796      | 6.3232179      | 1.847E-05 | 1.465629  | up        | PREDICTED: nuclear transcription factor Y subunit B-3-like [Sesamum indicum]                                       |
| c36679.graph_c0 | 22.070399      | 23.976515      | 23.53402       | 11.257217      | 7.9110791      | 5.3554121      | 2.255E-07 | -1.451599 | down      | hypothetical protein MIMGU_mgv1a014406mg [Erythranthe guttata]                                                     |
| c36704.graph_c0 | 23.873688      | 26.662977      | 20.566769      | 8.6461881      | 8.9361834      | 7.4744104      | 5.526E-17 | -1.461322 | down      | hypothetical protein MIMGU_mgv1a022795mg [Erythranthe guttata]                                                     |
| c36710.graph_c0 | 6.5258643      | 5.8922436      | 4.5262941      | 1.7922696      | 1.6065858      | 2.0854433      | 0.0004694 | -1.585112 | down      | hypothetical protein MIMGU_mgv1a009490mg [Erythranthe guttata]                                                     |
| c36710.graph_c1 | 9.3129359      | 13.527052      | 9.2512969      | 2.951208       | 4.3498394      | 6.0511417      | 0.0020607 | -1.231868 | down      | PREDICTED: zinc finger CCCH domain-containing protein 20-like [Sesamum indicum]                                    |
| c36729.graph_c0 | 20.269211      | 18.692667      | 19.414025      | 7.2818934      | 5.4946073      | 5.9598116      | 1.766E-17 | -1.592444 | down      | hypothetical protein MIMGU_mgv1a006282mg [Erythranthe guttata]                                                     |
| c36772.graph_c0 | 26.826784      | 27.843077      | 24.114429      | 68.996929      | 75.289833      | 78.607699      | 3.279E-26 | 1.540701  | up        | PREDICTED: protein CREG1 isoform X1 [Sesamum indicum]                                                              |

| #ID             | 28 h-1<br>FPKM | 28 h-2<br>FPKM | 28 h-3<br>FPKM | 48 h-1<br>FPKM | 48 h-2<br>FPKM | 48 h-3<br>FPKM | FDR       | log2FC    | regulated | nr_annotation                                                                                     |
|-----------------|----------------|----------------|----------------|----------------|----------------|----------------|-----------|-----------|-----------|---------------------------------------------------------------------------------------------------|
| c36786.graph_c0 | 0.2110116      | 0.2857855      | 0.602643       | 1.5780889      | 1.5584519      | 1.8563656      | 1.871E-07 | 2.222424  | up        | PREDICTED: uncharacterized protein LOC105170278 isoform X1 [Sesamum indicum]                      |
| c36792.graph_c0 | 44.737219      | 47.649834      | 39.225487      | 19.732627      | 17.626783      | 13.764376      | 1.531E-16 | -1.317372 | down      | PREDICTED: hexose carrier protein HEX6-like [Sesamum indicum]                                     |
| c36799.graph_c0 | 22.640738      | 23.951245      | 25.006276      | 6.6392753      | 7.6858082      | 7.0033494      | 3.968E-26 | -1.70717  | down      | PREDICTED: uncharacterized protein LOC105174622 [Sesamum indicum]                                 |
| c36800.graph_c0 | 1.2693451      | 1.462265       | 2.0715504      | 0.5548236      | 0.5877683      | 0.7898859      | 0.0048326 | -1.275787 | down      | hypothetical protein MIMGU_mgv1a002177mg [Erythranthe guttata]                                    |
| c36802.graph_c0 | 14.327054      | 13.367186      | 13.778395      | 4.5833887      | 7.0542817      | 8.1565434      | 1.199E-05 | -1.033854 | down      | -                                                                                                 |
| c36814.graph_c0 | 20.375322      | 18.898742      | 19.476285      | 8.4190035      | 9.5585167      | 8.237312       | 2.808E-10 | -1.123386 | down      | PREDICTED: uncharacterized protein At5g19025-like isoform X2 [Sesamum indicum]                    |
| c36825.graph_c0 | 2.5942875      | 3.4473032      | 2.8758123      | 8.5623804      | 7.0331595      | 5.5208367      | 0.0002909 | 1.292241  | up        | PREDICTED: transcription factor bHLH104 [Sesamum indicum]                                         |
| c36831.graph_c0 | 3.2360602      | 3.7740678      | 3.6308232      | 9.2293753      | 25.394091      | 27.450182      | 0.0010314 | 2.570154  | up        | PREDICTED: 1-aminocyclopropane-1-carboxylate oxidase 5-like [Sesamum indicum]                     |
| c36832.graph_c0 | 0.9581694      | 1.5226414      | 1.5324425      | 12.048339      | 11.168285      | 10.547628      | 5.375E-24 | 3.116749  | up        | protein with unknown function [Ricinus communis]                                                  |
| c36852.graph_c0 | 11.257678      | 9.6296472      | 9.6138695      | 21.000493      | 31.213789      | 28.633189      | 1.365E-10 | 1.441823  | up        | PREDICTED: probable polygalacturonase isoform X2 [Sesamum indicum]                                |
| c36857.graph_c0 | 13.395852      | 13.976063      | 14.2809        | 5.0304651      | 6.2275716      | 7.5801774      | 4.839E-11 | -1.108293 | down      | PREDICTED: ABC transporter C family member 5-like [Sesamum indicum]                               |
| c36865.graph_c0 | 10.553375      | 9.8018242      | 9.7633205      | 61.091964      | 62.05673       | 78.278854      | 2.053E-40 | 2.781323  | up        | PREDICTED: cinnamoyl-CoA reductase 1-like [Sesamum indicum]                                       |
| c36871.graph_c0 | 6.6226581      | 7.9277571      | 6.8711937      | 12.079262      | 16.096243      | 18.758397      | 1.449E-06 | 1.167378  | up        | PREDICTED: fatty acyl-CoA reductase 5-like isoform X1 [Sesamum indicum]                           |
| c36886.graph_c0 | 13.476877      | 13.005213      | 12.427861      | 4.4453731      | 5.8530292      | 4.6617995      | 1.783E-10 | -1.340306 | down      | PREDICTED: uncharacterized protein LOC105158662 [Sesamum indicum]                                 |
| c36900.graph_c0 | 0.451639       | 0.7476107      | 0.429956       | 2.2899426      | 2.3248367      | 2.1224762      | 1.524E-06 | 2.091546  | up        | PREDICTED: probable LRR receptor-like serine/threonine-protein kinase At1g06840 [Sesamum indicum] |
| c36900.graph_c1 | 1.2704145      | 1.5294202      | 1.0654436      | 2.7286383      | 3.2697646      | 2.8657487      | 0.0021148 | 1.237707  | up        | PREDICTED: probable LRR receptor-like serine/threonine-protein kinase At1g06840 [Sesamum indicum] |
| c36904.graph_c0 | 8.3002379      | 7.8604607      | 8.2585133      | 2.7902585      | 3.2559797      | 3.6214626      | 4.264E-15 | -1.298549 | down      | PREDICTED: LOW QUALITY PROTEIN: U-box domain-containing protein 17-like [Sesamum indicum]         |
| c36922.graph_c0 | 27.406965      | 29.904815      | 26.116439      | 9.3033471      | 12.475656      | 11.945558      | 1.112E-10 | -1.26955  | down      | PREDICTED: probable inactive receptor kinase At1g27190 [Sesamum indicum]                          |
| c36925.graph_c0 | 7.4294565      | 9.5306377      | 6.9899525      | 12.607972      | 15.700841      | 21.61278       | 0.0009619 | 1.095535  | up        | PREDICTED: protein ECERIFERUM 1-like [Sesamum indicum]                                            |
| c36933.graph_c0 | 0.1719677      | 0.0776354      | 0.1262918      | 0.6321471      | 0.8313309      | 0.9310026      | 2.34E-09  | 2.706854  | up        | PREDICTED: uncharacterized protein LOC105176404 [Sesamum indicum]                                 |
| c36943.graph_c0 | 17.901168      | 23.504474      | 20.735726      | 0.5616596      | 1.0710185      | 1.9240813      | 1.747E-52 | -4.099363 | down      | PREDICTED: probable protein phosphatase 2C 24 [Sesamum indicum]                                   |
| c36949.graph_c0 | 30.595678      | 26.580604      | 26.051294      | 7.697805       | 8.3878879      | 7.6322561      | 7.27E-15  | -1.769789 | down      | PREDICTED: probable receptor-like protein kinase At5g47070 [Sesamum indicum]                      |
| c36954.graph_c0 | 1.2793829      | 0.7599755      | 0.7417653      | 3.3714541      | 3.2551718      | 1.7847504      | 0.0015169 | 1.64426   | up        | PREDICTED: heat stress transcription factor B-2b [Sesamum indicum]                                |
| c36972.graph_c0 | 153.74083      | 162.1802       | 151.26137      | 687.71664      | 814.2887       | 1136.1599      | 4.924E-11 | 2.533714  | up        | chalcone synthase [Misopates orontium]                                                            |
| c36976.graph_c0 | 2.3647075      | 3.1264099      | 2.3086071      | 41.107762      | 59.482519      | 63.438996      | 7.733E-34 | 4.429748  | up        | hypothetical protein MIMGU_mgv1a008959mg [Erythranthe guttata]                                    |

| #ID             | 28 h-1<br>FPKM | 28 h-2<br>FPKM | 28 h-3<br>FPKM | 48 h-1<br>FPKM | 48 h-2<br>FPKM | 48 h-3<br>FPKM | FDR       | log2FC    | regulated | nr_annotation                                                                                   |
|-----------------|----------------|----------------|----------------|----------------|----------------|----------------|-----------|-----------|-----------|-------------------------------------------------------------------------------------------------|
| c36995.graph_c0 | 0.1720834      | 0.1553752      | 0.1203588      | 0.6855463      | 1.2874489      | 1.1922629      | 1.126E-08 | 2.853366  | up        | PREDICTED: protein ECERIFERUM 3-like [Sesamum indicum]                                          |
| c37005.graph_c0 | 25.530233      | 26.484595      | 26.278029      | 9.9346702      | 11.69166       | 8.3846909      | 5.671E-20 | -1.341853 | down      | PREDICTED: MND1-interacting protein 1-like isoform X2 [Sesamum indicum]                         |
| c37020.graph_c0 | 6.8614847      | 6.987155       | 5.5147213      | 33.743441      | 37.548294      | 33.632331      | 6.761E-35 | 2.479294  | up        | PREDICTED: 1-deoxyloganetin glucosyltransferase-like [Sesamum indicum]                          |
| c37023.graph_c0 | 5.2198675      | 4.7421438      | 6.2575918      | 12.743017      | 9.9949563      | 11.702078      | 3.474E-06 | 1.131461  | up        | PREDICTED: bifunctional riboflavin kinase/FMN phosphatase-like isoform X2 [Sesamum indicum]     |
| c37037.graph_c0 | 2.227493       | 1.781364       | 2.5446626      | 0.0806718      | 0.6836956      | 0.4306875      | 3.479E-07 | -2.438272 | down      | -                                                                                               |
| c37042.graph_c0 | 0.5423386      | 0.3390098      | 0.5787112      | 1.2162649      | 1.8486962      | 1.223385       | 0.0003795 | 1.590765  | up        | -                                                                                               |
| c37051.graph_c0 | 10.637935      | 10.511195      | 10.591263      | 23.406824      | 20.753753      | 21.506401      | 1.419E-05 | 1.093076  | up        | PREDICTED: transcription repressor OFP1 [Sesamum indicum]                                       |
| c37077.graph_c0 | 4.7818336      | 4.1846998      | 3.8719223      | 15.386444      | 13.929152      | 13.898201      | 1.679E-13 | 1.795322  | up        | hypothetical protein MIMGU_mgv1a0032972mg, partial [Erythranthe guttata]                        |
| c37090.graph_c0 | 20.530299      | 23.76392       | 25.664527      | 41.985857      | 52.012292      | 74.885809      | 0.0004727 | 1.306393  | up        | PREDICTED: protein ASPARTIC PROTEASE IN GUARD CELL 2-like [Sesamum indicum]                     |
| c37094.graph_c0 | 1.7435976      | 1.7796493      | 1.5155502      | 0.0480465      | 0.2035977      | 0.1710059      | 1.915E-11 | -3.553096 | down      | PREDICTED: transmembrane 9 superfamily member 12-like [Sesamum indicum]                         |
| c37097.graph_c0 | 5.3611861      | 5.2924423      | 5.3079501      | 16.490895      | 14.062473      | 13.464144      | 1.256E-10 | 1.509232  | up        | PREDICTED: LOW QUALITY PROTEIN: transcription factor bHLH96-like [Sesamum indicum]              |
| c37117.graph_c0 | 4.1081135      | 3.7805729      | 4.3191641      | 14.72074       | 13.685266      | 17.553672      | 2.605E-15 | 1.953638  | up        | PREDICTED: psbP-like protein 1, chloroplastic [Sesamum indicum]                                 |
| c37119.graph_c0 | 12.266954      | 11.631027      | 13.593171      | 21.89515       | 25.829294      | 27.374104      | 3.866E-10 | 1.040468  | up        | PREDICTED: uncharacterized protein LOC105157824 isoform X3 [Sesamum indicum]                    |
| c37123.graph_c0 | 4.03595        | 3.5665507      | 2.8378455      | 21.98733       | 18.85342       | 16.561768      | 2.115E-18 | 2.50573   | up        | PREDICTED: phospholipase D alpha 1-like [Sesamum indicum]                                       |
| c37135.graph_c0 | 0.9528678      | 1.0129931      | 0.9154817      | 2.220849       | 3.2401498      | 3.9001936      | 7.286E-07 | 1.733953  | up        | hypothetical protein MIMGU_mgv1a001054mg [Erythranthe guttata]                                  |
| c37138.graph_c0 | 0.3658564      | 0.4129176      | 0.1990239      | 1.8549999      | 1.5557417      | 1.7537282      | 2.746E-08 | 2.446708  | up        | PREDICTED: probable polygalacturonase At1g80170 [Sesamum indicum]                               |
| c37145.graph_c0 | 8.118123       | 8.9895048      | 8.5491251      | 15.998533      | 21.555867      | 26.121266      | 1.579E-06 | 1.346571  | up        | PREDICTED: ACT domain-containing protein DS12, chloroplastic-like isoform X1 [Sesamum indicum]  |
| c37146.graph_c0 | 17.549118      | 22.791392      | 19.994296      | 51.222035      | 68.197058      | 83.990244      | 1.091E-08 | 1.788695  | up        | PREDICTED: arogenate dehydratase/prephenate dehydratase 6, chloroplastic-like [Sesamum indicum] |
| c37149.graph_c0 | 0.7047944      | 1.2946702      | 1.4278506      | 5.883978       | 7.5061418      | 9.7309556      | 8.815E-13 | 2.789265  | up        | PREDICTED: replication protein A 70 kDa DNA-binding subunit B [Sesamum indicum]                 |
| c37157.graph_c0 | 16.43261       | 16.966722      | 14.9528        | 1.8069793      | 0.9397352      | 0.7600695      | 1.469E-53 | -3.727102 | down      | PREDICTED: probable protein phosphatase 2C 8 isoform X1 [Sesamum indicum]                       |
| c37161.graph_c0 | 1.2388739      | 1.2384356      | 1.6607823      | 14.806288      | 11.169954      | 8.7331273      | 6.696E-09 | 3.117911  | up        | hypothetical protein MIMGU_mgv1a014011mg [Erythranthe guttata]                                  |
| c37164.graph_c0 | 0.621321       | 0.7479928      | 1.0139857      | 5.5129907      | 9.1776853      | 7.9421183      | 1.723E-11 | 3.280718  | up        | PREDICTED: flavonoid 3'-monooxygenase-like, partial [Solanum tuberosum]                         |



| #ID             | 28 h-1<br>FPKM | 28 h-2<br>FPKM | 28 h-3<br>FPKM | 48 h-1<br>FPKM | 48 h-2<br>FPKM | 48 h-3<br>FPKM | FDR       | log2FC    | regulated | nr_annotation                                                                             |
|-----------------|----------------|----------------|----------------|----------------|----------------|----------------|-----------|-----------|-----------|-------------------------------------------------------------------------------------------|
| c37167.graph_c0 | 3.7373593      | 3.7442916      | 4.0940569      | 0.1297912      | 0.274996       | 0.8084119      | 2.382E-11 | -3.230837 | down      | -                                                                                         |
| c37173.graph_c0 | 49.141437      | 43.748432      | 63.102168      | 1230.4472      | 1210.3904      | 1453.0253      | 4.006E-94 | 4.681861  | up        | PREDICTED: vignain-like [Sesamum indicum]                                                 |
| c37183.graph_c0 | 5.1226119      | 4.6969474      | 4.277219       | 0.2852349      | 0.7287672      | 0.8360479      | 2.522E-23 | -2.903227 | down      | hypothetical protein MIMGU_mgv1a024814mg, partial [Erythranthe guttata]                   |
| c37184.graph_c0 | 0              | 0.2492659      | 0.1126357      | 2.7995193      | 3.5681695      | 4.8263037      | 1.587E-18 | 4.987819  | up        | unnamed protein product [Coffea canephora]                                                |
| c37191.graph_c0 | 1.9635046      | 1.3939285      | 1.5410509      | 5.6997405      | 6.2797113      | 8.6048058      | 1.269E-11 | 2.108559  | up        | PREDICTED: kinesin-3-like [Sesamum indicum]                                               |
| c37196.graph_c0 | 13.518747      | 12.635027      | 11.955422      | 4.6313535      | 6.5254555      | 5.4396547      | 3.681E-06 | -1.162101 | down      | PREDICTED: protein IWS1 homolog A-like isoform X2 [Sesamum indicum]                       |
| c37196.graph_c1 | 12.04893       | 12.77304       | 11.18747       | 5.5305788      | 5.9265812      | 4.7128764      | 5.656E-10 | -1.112197 | down      | hypothetical protein MIMGU_mgv1a000837mg [Erythranthe guttata]                            |
| c37200.graph_c0 | 21.211572      | 21.744069      | 22.96951       | 46.799952      | 44.117703      | 42.541718      | 1.602E-11 | 1.061039  | up        | PREDICTED: LIM domain-containing protein WLIM2b [Sesamum indicum]                         |
| c37202.graph_c0 | 0.2425025      | 0.218957       | 0.1978801      | 1.7828609      | 1.3676974      | 1.367568       | 1.766E-09 | 2.824391  | up        | PREDICTED: condensin complex subunit 3 [Sesamum indicum]                                  |
| c37202.graph_c1 | 0.3795523      | 0.4378947      | 0.5505984      | 3.6617859      | 3.1147007      | 3.4960625      | 2.689E-15 | 2.9525    | up        | PREDICTED: condensin complex subunit 3 [Sesamum indicum]                                  |
| c37214.graph_c0 | 211.66986      | 203.32482      | 227.79727      | 105.95446      | 75.395109      | 53.710378      | 1.051E-12 | -1.399309 | down      | PREDICTED: uncharacterized protein LOC105174797 [Sesamum indicum]                         |
| c37225.graph_c0 | 0.3431489      | 0.1032771      | 0.2800067      | 6.1257786      | 4.4159453      | 3.580033       | 1.059E-11 | 4.330642  | up        | PREDICTED: cytochrome P450 714A1-like [Sesamum indicum]                                   |
| c37246.graph_c0 | 0.2356552      | 0.3647564      | 0.4395262      | 1.2375142      | 1.2657895      | 0.7973719      | 0.0001856 | 1.711154  | up        | PREDICTED: ALA-interacting subunit 3-like [Sesamum indicum]                               |
| c37260.graph_c0 | 0.3349025      | 0.2591876      | 0.117119       | 3.3354642      | 2.9553076      | 1.5109187      | 5.165E-06 | 3.506323  | up        | PREDICTED: uncharacterized protein LOC105156178 [Sesamum indicum]                         |
| c37313.graph_c0 | 15.918971      | 17.053113      | 16.166421      | 8.4524819      | 6.4699275      | 5.1299085      | 3.256E-08 | -1.243284 | down      | PREDICTED: C2 and GRAM domain-containing protein At1g03370 isoform X2 [Sesamum indicum]   |
| c37325.graph_c0 | 8.3875027      | 6.6458067      | 6.8441337      | 17.358004      | 18.235461      | 19.885499      | 5.376E-08 | 1.382912  | up        | PREDICTED: vacuolar iron transporter 1 [Nicotiana glauca]                                 |
| c37350.graph_c0 | 2.2769633      | 3.1841136      | 2.7643169      | 5.7020418      | 5.854183       | 5.4807867      | 0.0004029 | 1.092919  | up        | PREDICTED: OTU domain-containing protein DDB_G0284757-like [Sesamum indicum]              |
| c37359.graph_c0 | 0.4676757      | 0.5730771      | 0.4906537      | 1.0585954      | 1.2111697      | 1.1114795      | 0.0049954 | 1.183179  | up        | PREDICTED: oxysterol-binding protein-related protein 1C-like isoform X1 [Sesamum indicum] |
| c37384.graph_c0 | 2.5977184      | 1.8894274      | 1.4425852      | 6.2197321      | 3.8759129      | 4.0693237      | 0.0045478 | 1.308292  | up        | hypothetical protein MIMGU_mgv1a022389mg [Erythranthe guttata]                            |
| c37386.graph_c0 | 1.2133739      | 0.6573377      | 0.5940619      | 71.365091      | 89.289349      | 102.64046      | 6.206E-66 | 6.776079  | up        | --                                                                                        |
| c37387.graph_c0 | 15.136319      | 12.103117      | 11.932431      | 33.982691      | 30.876061      | 29.550376      | 4.726E-16 | 1.313615  | up        | hypothetical protein MIMGU_mgv1a011856mg [Erythranthe guttata]                            |
| c37389.graph_c0 | 0.3287735      | 0.2585482      | 0.3894336      | 2.7827785      | 2.7486336      | 2.7871072      | 1.887E-22 | 3.131857  | up        | unnamed protein product [Coffea canephora]                                                |
| c37391.graph_c1 | 54.066694      | 48.057946      | 52.79749       | 119.10763      | 95.524256      | 107.92543      | 1.142E-09 | 1.103346  | up        | PREDICTED: auxin-induced protein AUX28-like [Sesamum indicum]                             |
| c37416.graph_c0 | 8.4268705      | 9.6020006      | 9.4905534      | 25.936345      | 23.535717      | 23.229833      | 1.109E-17 | 1.445755  | up        | PREDICTED: rho GTPase-activating protein 2 [Sesamum indicum]                              |
| c37435.graph_c1 | 12.365898      | 13.398296      | 12.631776      | 5.9215484      | 6.2731625      | 5.2689581      | 0.0019259 | -1.094067 | down      | PREDICTED: auxin efflux carrier component 2 [Sesamum indicum]                             |
| c37435.graph_c2 | 0.7972516      | 0.9997826      | 0.5421257      | 1.6281488      | 1.7248262      | 2.1980534      | 0.00271   | 1.286641  | up        | PREDICTED: probable auxin efflux carrier component 1b isoform X2 [Sesamum indicum]        |
| c37458.graph_c0 | 9.9356571      | 10.53567       | 9.4743629      | 16.822745      | 20.963235      | 20.865075      | 1.663E-11 | 1.007978  | up        | PREDICTED: probable long-chain-alcohol O-fatty-acyltransferase 5 [Sesamum indicum]        |

| #ID             | 28 h-1<br>FPKM | 28 h-2<br>FPKM | 28 h-3<br>FPKM | 48 h-1<br>FPKM | 48 h-2<br>FPKM | 48 h-3<br>FPKM | FDR       | log2FC    | regulated | nr_annotation                                                                              |
|-----------------|----------------|----------------|----------------|----------------|----------------|----------------|-----------|-----------|-----------|--------------------------------------------------------------------------------------------|
| c37460.graph_c0 | 14.235067      | 13.28584       | 13.279581      | 37.771539      | 36.624948      | 40.440064      | 6.813E-25 | 1.534806  | up        | PREDICTED: acetyl-CoA carboxylase 1-like isoform X1 [Sesamum indicum]                      |
| c37475.graph_c0 | 4.8073298      | 5.5807304      | 4.3430356      | 7.5082407      | 11.758191      | 11.037823      | 0.0032066 | 1.075492  | up        | PREDICTED: reticulon-like protein B8 [Sesamum indicum]                                     |
| c37479.graph_c0 | 0.9791283      | 0.8840611      | 0.9987009      | 0.0443256      | 0.0939152      | 0.3944067      | 1.019E-06 | -2.40405  | down      | hypothetical protein MIMGU_mgv1a022974mg [Erythranthe guttata]                             |
| c37481.graph_c0 | 3.9833089      | 5.1138509      | 4.2491523      | 20.85399       | 13.7624        | 12.799493      | 0.000113  | 1.880739  | up        | PREDICTED: uncharacterized protein LOC105162159 [Sesamum indicum]                          |
| c37493.graph_c0 | 3.8924562      | 3.8773125      | 4.1393221      | 24.765371      | 21.076404      | 18.353957      | 4.54E-17  | 2.476942  | up        | PREDICTED: serine/threonine-protein kinase-like protein CCR1 [Sesamum indicum]             |
| c37495.graph_c0 | 8.8940038      | 8.4726256      | 8.9847812      | 13.576625      | 19.643748      | 18.459135      | 1.066E-07 | 1.007378  | up        | PREDICTED: uncharacterized protein LOC105159151 [Sesamum indicum]                          |
| c37496.graph_c0 | 2.550306       | 2.0698312      | 1.9641172      | 4.7219224      | 6.426037       | 7.3688516      | 3.548E-07 | 1.527203  | up        | hypothetical protein MIMGU_mgv1a012483mg [Erythranthe guttata]                             |
| c37503.graph_c0 | 306.24502      | 241.87151      | 298.98658      | 432.39273      | 637.07625      | 687.62961      | 3.353E-05 | 1.086734  | up        | PREDICTED: WAI1-related protein At2g39510-like [Sesamum indicum]                           |
| c37505.graph_c1 | 257.21468      | 264.93152      | 258.89417      | 121.90591      | 126.65449      | 123.28845      | 2.19E-11  | -1.029025 | down      | PREDICTED: uncharacterized protein LOC101224374, partial [Cucumis sativus]                 |
| c37508.graph_c0 | 1.9261639      | 1.6380323      | 1.553458       | 4.8547191      | 6.1354923      | 6.8458401      | 1.061E-10 | 1.83819   | up        | PREDICTED: kinesin-4-like [Sesamum indicum]                                                |
| c37508.graph_c1 | 2.1057235      | 2.7806087      | 2.1478165      | 6.4727122      | 6.7863624      | 8.8765708      | 8.649E-10 | 1.693204  | up        | PREDICTED: kinesin-4-like [Sesamum indicum]                                                |
| c37516.graph_c0 | 4.7379014      | 4.8825601      | 5.1874104      | 9.4392427      | 12.120482      | 11.848764      | 9.989E-15 | 1.211327  | up        | hypothetical protein MIMGU_mgv1a001577mg [Erythranthe guttata]                             |
| c37532.graph_c0 | 4.7494245      | 4.339336       | 4.5214068      | 67.082734      | 76.228938      | 93.616074      | 2.849E-50 | 4.159578  | up        | hypothetical protein JCGZ_04972 [Jatropha curcas]                                          |
| c37539.graph_c1 | 6.6532932      | 7.0752644      | 6.6354847      | 2.4363558      | 2.7795638      | 2.6681289      | 0.0030579 | -1.328986 | down      | -                                                                                          |
| c37544.graph_c0 | 163.37073      | 188.03003      | 195.86996      | 22.835944      | 22.905761      | 19.959197      | 2.341E-81 | -3.01512  | down      | PREDICTED: uncharacterized GPI-anchored protein At3g06035 [Sesamum indicum]                |
| c37563.graph_c0 | 0.2251474      | 0.1355247      | 0.5511553      | 5.9932093      | 8.566217       | 8.8878693      | 7.844E-22 | 4.717461  | up        | hypothetical protein MIMGU_mgv1a018370mg [Erythranthe guttata]                             |
| c37569.graph_c0 | 2.458805       | 2.5752817      | 2.6082743      | 1.3090209      | 0.6603566      | 0.8874354      | 0.0019043 | -1.366139 | down      | hypothetical protein MIMGU_mgv1a000964mg [Erythranthe guttata]                             |
| c37570.graph_c1 | 2.3851589      | 1.8245565      | 2.3517432      | 3.821197       | 4.5819095      | 5.5671608      | 0.0010296 | 1.126964  | up        | PREDICTED: probable prolyl 4-hydroxylase 9 [Sesamum indicum]                               |
| c37590.graph_c0 | 1.339353       | 1.2886092      | 1.7916412      | 3.2841307      | 3.7444962      | 3.7889539      | 7.637E-05 | 1.330314  | up        | PREDICTED: LOW QUALITY PROTEIN: interactor of constitutive active ROPs 3 [Sesamum indicum] |
| c37600.graph_c0 | 115.5635       | 104.75438      | 112.19733      | 583.07397      | 636.96844      | 702.76597      | 5.619E-41 | 2.57121   | up        | PREDICTED: alpha-L-arabinofuranosidase 1-like [Sesamum indicum]                            |
| c37606.graph_c0 | 1.5468362      | 2.2040853      | 2.228582       | 4.9630949      | 4.2516755      | 3.4347693      | 0.0007608 | 1.128067  | up        | PREDICTED: aspartic proteinase-like protein 1 [Sesamum indicum]                            |
| c37620.graph_c0 | 9.6671153      | 8.6582963      | 10.193443      | 27.299978      | 25.927987      | 29.026855      | 1.726E-22 | 1.570074  | up        | -                                                                                          |
| c37623.graph_c0 | 58.54195       | 59.715832      | 59.697574      | 156.40531      | 155.39682      | 166.96987      | 2.749E-24 | 1.469462  | up        | ATP binding protein, putative [Ricinus communis]                                           |
| c37626.graph_c0 | 14.362503      | 14.419781      | 15.248002      | 2.6991559      | 3.9098306      | 4.8033853      | 5.592E-22 | -1.914197 | down      | PREDICTED: uncharacterized protein LOC1051173972 [Sesamum indicum]                         |
| c37627.graph_c0 | 201.28955      | 202.25114      | 186.14801      | 367.62165      | 446.64027      | 499.60127      | 2.263E-12 | 1.193454  | up        | PREDICTED: low-temperature-induced cysteine proteinase [Sesamum indicum]                   |
| c37629.graph_c0 | 0.3266846      | 0.688253       | 0.6516204      | 6.6715598      | 7.7988509      | 5.9772539      | 6.227E-22 | 3.658206  | up        | PREDICTED: hippocampus abundant transcript 1 protein-like isoform X1 [Sesamum indicum]     |

| #ID             | 28 h-1<br>FPKM | 28 h-2<br>FPKM | 28 h-3<br>FPKM | 48 h-1<br>FPKM | 48 h-2<br>FPKM | 48 h-3<br>FPKM | FDR       | log2FC    | regulated | nr_annotation                                                                                                |
|-----------------|----------------|----------------|----------------|----------------|----------------|----------------|-----------|-----------|-----------|--------------------------------------------------------------------------------------------------------------|
| c37639.graph_c0 | 1.4743723      | 0.7930672      | 0.8959075      | 0.1988165      | 0.3369952      | 0.1769058      | 0.0004649 | -2.113681 | down      | PREDICTED: LOW QUALITY PROTEIN: transcription factor GAMYB [Sesamum indicum]                                 |
| c37646.graph_c0 | 5.941652       | 6.66197        | 6.2988673      | 1.8828704      | 1.7003769      | 1.950017       | 4.977E-09 | -1.72936  | down      | PREDICTED: trehalose-phosphate phosphatase A-like isoform X2 [Sesamum indicum]                               |
| c37673.graph_c1 | 7.8776431      | 8.7823308      | 7.7715844      | 21.094755      | 19.524156      | 17.370094      | 3.187E-13 | 1.291942  | up        | PREDICTED: ethylene receptor 1 [Sesamum indicum]                                                             |
| c37674.graph_c0 | 6416.4739      | 7280.4562      | 6194.2988      | 1461.4495      | 1321.9718      | 1432.3633      | 9.196E-19 | -2.194569 | down      | 2S albumin precursor isoform 3 [Sesamum indicum]                                                             |
| c37711.graph_c0 | 3.9954726      | 4.8623327      | 4.2879678      | 0.8257428      | 0.8747744      | 1.5184647      | 1.478E-06 | -1.993678 | down      | PREDICTED: telomere repeat-binding protein 5 [Sesamum indicum]                                               |
| c37711.graph_c1 | 5.9787632      | 5.559062       | 5.8335863      | 1.2577123      | 2.0498364      | 2.0660397      | 9.904E-08 | -1.659534 | down      | PREDICTED: telomere repeat-binding protein 5 [Sesamum indicum]                                               |
| c37725.graph_c0 | 1.5661522      | 1.4755707      | 1.1483185      | 5.5528428      | 6.2787985      | 7.4497299      | 4.842E-15 | 2.240914  | up        | PREDICTED: uncharacterized protein LOC105169345 [Sesamum indicum]                                            |
| c37726.graph_c0 | 13.257131      | 15.037454      | 14.524058      | 5.8979197      | 7.4382509      | 6.2891902      | 3.889E-06 | -1.086472 | down      | PREDICTED: WPP domain-interacting protein 1 [Sesamum indicum]                                                |
| c37733.graph_c0 | 1.1928966      | 1.2999167      | 0.9957708      | 2.3984786      | 3.0380293      | 3.170298       | 9.048E-06 | 1.340605  | up        | PREDICTED: protein argonaute 16 isoform X1 [Sesamum indicum]                                                 |
| c37737.graph_c0 | 3.6976632      | 3.2121794      | 3.2229855      | 7.5277032      | 7.1471267      | 7.8671139      | 1.18E-05  | 1.195903  | up        | PREDICTED: glucose-6-phosphate 1-dehydrogenase, chloroplastic [Sesamum indicum]                              |
| c37751.graph_c0 | 2.0048915      | 2.2200922      | 1.9292159      | 4.8429455      | 4.495549       | 4.8425435      | 1.059E-05 | 1.247512  | up        | PREDICTED: proline-rich receptor-like protein kinase PERK10 [Sesamum indicum]                                |
| c37759.graph_c0 | 0              | 0              | 0.0510812      | 1.388631       | 1.5551482      | 0.9531737      | 5.761E-18 | 6.291857  | up        | hypothetical protein MIMGU_mgv1a007953mg [Erythranthe guttata]                                               |
| c37764.graph_c0 | 62.855129      | 59.036808      | 71.066067      | 857.55925      | 555.06634      | 813.01661      | 4.264E-16 | 3.574737  | up        | PREDICTED: acid phosphatase 1-like [Camelina sativa]                                                         |
| c37770.graph_c0 | 8.856469       | 9.6196255      | 8.7115215      | 2.3341659      | 3.4147718      | 4.2774802      | 4.708E-09 | -1.405486 | down      | PREDICTED: pentatricopeptide repeat-containing protein At3g48250, chloroplastic [Sesamum indicum]            |
| c37795.graph_c0 | 0.7754174      | 0.8078414      | 0.8274217      | 2.0036011      | 2.242718       | 2.3546312      | 0.0003049 | 1.492738  | up        | PREDICTED: putative late blight resistance protein homolog R1B-16 [Sesamum indicum]                          |
| c37803.graph_c0 | 10.005451      | 10.596522      | 10.639646      | 3.8577432      | 4.3405674      | 4.9245423      | 6.682E-14 | -1.212599 | down      | PREDICTED: LOW QUALITY PROTEIN: LRR receptor-like serine/threonine-protein kinase RCH1 [Sesamum indicum]     |
| c37805.graph_c0 | 64.618662      | 66.836404      | 65.265331      | 216.79655      | 135.5481       | 123.2228       | 0.0092622 | 1.326444  | up        | hypothetical protein MIMGU_mgv1a026895mg [Erythranthe guttata]                                               |
| c37818.graph_c0 | 0.0545057      | 0.1230338      | 0.2001429      | 0.6563549      | 1.1344832      | 1.0143516      | 7.981E-10 | 2.924846  | up        | PREDICTED: phosphoinositide phosphatase C 6-like [Sesamum indicum]                                           |
| c37828.graph_c0 | 14.504278      | 14.535002      | 14.486738      | 5.684704       | 6.1383862      | 5.5737911      | 2.577E-16 | -1.281607 | down      | PREDICTED: uncharacterized protein LOC105151890 [Sesamum indicum]                                            |
| c37839.graph_c0 | 1.1429957      | 1.1899799      | 1.0373632      | 3.769918       | 3.9937709      | 4.5778381      | 8.645E-14 | 1.912623  | up        | PREDICTED: histidine kinase 1 [Sesamum indicum]                                                              |
| c37841.graph_c0 | 14.150314      | 15.429065      | 12.472085      | 24.017556      | 31.636068      | 32.003585      | 6.553E-12 | 1.096939  | up        | PREDICTED: CBL-interacting protein kinase 23 [Sesamum indicum]                                               |
| c37842.graph_c0 | 47.724326      | 48.875903      | 50.445169      | 172.80027      | 233.14308      | 299.04047      | 1.299E-09 | 2.295895  | up        | -                                                                                                            |
| c37847.graph_c0 | 0.9200024      | 0.5895119      | 0.6538481      | 2.6709073      | 2.6700938      | 3.9162985      | 3.991E-08 | 2.135874  | up        | PREDICTED: probable LRR receptor-like serine/threonine-protein kinase At1g56140 isoform X1 [Sesamum indicum] |
| c37849.graph_c0 | 290.77141      | 293.75127      | 317.85985      | 57.360881      | 47.253875      | 51.21452       | 2.412E-58 | -2.488587 | down      | hypothetical protein MIMGU_mgv1a008920mg [Erythranthe guttata]                                               |
| c37852.graph_c0 | 6.0297383      | 5.3136254      | 5.8452181      | 39.408017      | 28.987179      | 22.877951      | 1.507E-06 | 2.459217  | up        | beta-D-xylosidase family protein [Populus trichocarpa]                                                       |

| #ID             | 28 h-1<br>FPKM | 28 h-2<br>FPKM | 28 h-3<br>FPKM | 48 h-1<br>FPKM | 48 h-2<br>FPKM | 48 h-3<br>FPKM | FDR       | log2FC    | regulated | nr_annotation                                                                              |
|-----------------|----------------|----------------|----------------|----------------|----------------|----------------|-----------|-----------|-----------|--------------------------------------------------------------------------------------------|
| c37862.graph_c0 | 0.4383244      | 0.5371107      | 0.5875992      | 1.8652568      | 1.0931138      | 1.2006299      | 0.0038301 | 1.46414   | up        | PREDICTED: flavonol synthase/flavanone 5-hydroxylase [Sesamum indicum]                     |
| c37863.graph_c0 | 0.150338       | 0.4615197      | 0.4170935      | 3.2777084      | 2.8263189      | 4.4086405      | 2.254E-15 | 3.393779  | up        | PREDICTED: uncharacterized protein LOC105168997 [Sesamum indicum]                          |
| c37867.graph_c0 | 1.0930575      | 0.9869284      | 1.0070132      | 0.0893891      | 0.1420454      | 0.1193068      | 1.366E-09 | -3.102845 | down      | PREDICTED: uncharacterized protein LOC105158642 [Sesamum indicum]                          |
| c37873.graph_c0 | 6.0705015      | 5.6321474      | 4.894974       | 13.996068      | 13.960616      | 14.717911      | 3.362E-13 | 1.404372  | up        | PREDICTED: oxygen-evolving enhancer protein 1, chloroplastic-like [Nicotiana glauca]       |
| c37874.graph_c0 | 18.637213      | 17.222826      | 18.481512      | 114.28303      | 81.300389      | 62.773635      | 2.98E-05  | 2.300668  | up        | PREDICTED: aspartic proteinase-like protein 1 isoform X1 [Sesamum indicum]                 |
| c37888.graph_c0 | 5.0693649      | 5.5831307      | 4.818411       | 1.9065541      | 2.244181       | 2.8274006      | 0.0066473 | -1.111303 | down      | PREDICTED: myb-related protein 306-like [Sesamum indicum]                                  |
| c37891.graph_c0 | 0.7438123      | 0.5682708      | 0.9648866      | 5.8020732      | 6.940528       | 7.0341105      | 9.241E-28 | 3.156345  | up        | PREDICTED: receptor-like serine/threonine-protein kinase NCRK isoform X1 [Sesamum indicum] |
| c37904.graph_c0 | 7.6245785      | 6.8051498      | 10.226298      | 21.440114      | 18.476542      | 17.792286      | 2.989E-05 | 1.27164   | up        | PREDICTED: uncharacterized protein LOC105164967 [Sesamum indicum]                          |
| c37906.graph_c0 | 35.57082       | 29.984338      | 32.449601      | 84.15371       | 60.677672      | 51.089798      | 0.0082896 | 1.049732  | up        | PREDICTED: protein TRANSPORT INHIBITOR RESPONSE 1-like [Sesamum indicum]                   |
| c37914.graph_c0 | 0.2569387      | 0.2029926      | 0.4193198      | 2.1983991      | 4.5284891      | 6.2306118      | 1.041E-05 | 3.908125  | up        | PREDICTED: geraniol synthase, chloroplastic-like [Sesamum indicum]                         |
| c37922.graph_c0 | 0.7492812      | 1.1839287      | 0.9680616      | 2.8493074      | 3.6892725      | 3.0282709      | 6.11E-05  | 1.76041   | up        | PREDICTED: peptidyl-prolyl cis-trans isomerase FKBP18, chloroplastic [Sesamum indicum]     |
| c37931.graph_c0 | 0.7467922      | 0.6009917      | 0.8610753      | 2.0166996      | 1.7440398      | 2.0691075      | 0.0001007 | 1.443042  | up        | hypothetical protein MIMGU_mgv1a001348mg [Erythranthe guttata]                             |
| c37938.graph_c1 | 2.0186482      | 2.0830286      | 1.8354519      | 4.5083359      | 4.0273595      | 4.5752672      | 4.839E-05 | 1.186382  | up        | PREDICTED: chromosome-associated kinesin KIF4A [Sesamum indicum]                           |
| c37940.graph_c0 | 0.2234406      | 0.2567676      | 0.248626       | 0.514959       | 1.0637965      | 0.7331319      | 0.0007428 | 1.697183  | up        | PREDICTED: uncharacterized protein At5g41620 [Sesamum indicum]                             |
| c37960.graph_c0 | 81.758534      | 60.21331       | 89.672893      | 12.886309      | 11.632601      | 6.0560705      | 4.201E-17 | -2.872831 | down      | hypothetical protein MIMGU_mgv1a009609mg [Erythranthe guttata]                             |
| c37964.graph_c0 | 367.28086      | 380.42802      | 372.93669      | 57.731919      | 83.876527      | 95.083186      | 4.438E-45 | -2.208875 | down      | uncharacterized LOC102580903 [Solanum tuberosum]                                           |
| c37965.graph_c0 | 1.4185078      | 1.430658       | 1.2436869      | 2.1423731      | 3.161207       | 3.6423386      | 0.0001244 | 1.16233   | up        | PREDICTED: filament-like plant protein 7 [Sesamum indicum]                                 |
| c37966.graph_c0 | 2.2876291      | 2.2791885      | 2.2850819      | 0.2999729      | 0.6355699      | 0.9786851      | 6.71E-05  | -1.812723 | down      | -                                                                                          |
| c37968.graph_c0 | 84.792128      | 90.297508      | 94.393883      | 18.084123      | 19.582619      | 20.41118       | 2.751E-49 | -2.173981 | down      | BnaC06g30860D [Brassica napus]                                                             |
| c37976.graph_c0 | 18.907299      | 17.856104      | 16.797424      | 5.2794433      | 7.4035908      | 9.192459       | 3.498E-10 | -1.25751  | down      | PREDICTED: ninja-family protein AFP1-like [Sesamum indicum]                                |
| c37983.graph_c0 | 5.9014984      | 5.856946       | 6.427399       | 2.2256283      | 3.209205       | 2.970526       | 0.0001835 | -1.07767  | down      | PREDICTED: cytochrome P450 71D11-like [Sesamum indicum]                                    |
| c37983.graph_c1 | 1.8298942      | 1.1522081      | 1.2574136      | 0.1526004      | 0.5496494      | 0.5702881      | 0.0003415 | -1.713164 | down      | PREDICTED: F-box/keich-repeat protein At1g57790-like [Sesamum indicum]                     |
| c37994.graph_c0 | 38.905985      | 40.584537      | 34.498251      | 59.418114      | 80.321931      | 91.219681      | 3.288E-06 | 1.054557  | up        | PREDICTED: polygalacturonase At1g48100 [Sesamum indicum]                                   |
| c38004.graph_c0 | 0.1039939      | 0.0704226      | 0.2121454      | 2.4716237      | 2.3390911      | 2.7563756      | 1.852E-19 | 4.330856  | up        | PREDICTED: uncharacterized protein LOC105177313 isoform X1 [Sesamum indicum]               |
| c38009.graph_c0 | 3.0067807      | 3.8007774      | 2.9442102      | 0.9909421      | 1.5342983      | 1.2886887      | 0.0028504 | -1.318615 | down      | -                                                                                          |
| c38024.graph_c0 | 14.329424      | 19.734625      | 16.635295      | 3.6277505      | 5.7120965      | 7.1191786      | 1.226E-09 | -1.590428 | down      | PREDICTED: lysine histidine transporter 1-like [Solanum tuberosum]                         |

| #ID             | 28 h-1<br>FPKM | 28 h-2<br>FPKM | 28 h-3<br>FPKM | 48 h-1<br>FPKM | 48 h-2<br>FPKM | 48 h-3<br>FPKM | FDR       | log2FC    | regulated | nr_annotation                                                                                     |
|-----------------|----------------|----------------|----------------|----------------|----------------|----------------|-----------|-----------|-----------|---------------------------------------------------------------------------------------------------|
| c38036.graph_c0 | 3.5028239      | 2.9962625      | 3.4600179      | 1.3437106      | 1.0934119      | 1.4382163      | 2.109E-05 | -1.31825  | down      | PREDICTED: pentatricopeptide repeat-containing protein At1g74900, mitochondrial [Sesamum indicum] |
| c38037.graph_c0 | 29.147971      | 30.185689      | 28.476817      | 12.748555      | 14.443433      | 13.811868      | 6.272E-12 | -1.058449 | down      | hypothetical protein MIMGU_mgv1a006765mg [Erythranthe guttata]                                    |
| c38039.graph_c0 | 0.0486727      | 0.1098672      | 0.0595748      | 0.8637471      | 1.0457546      | 0.9606962      | 1.606E-13 | 3.758226  | up        | PREDICTED: DNA-directed primase/polymerase protein isoform X1 [Sesamum indicum]                   |
| c38055.graph_c0 | 5.2619017      | 5.3262375      | 5.5259325      | 3.1106017      | 2.5982215      | 2.0492326      | 0.0005187 | -1.006739 | down      | PREDICTED: pyruvate kinase isozyme G, chloroplastic isoform X1 [Sesamum indicum]                  |
| c38063.graph_c1 | 259.15469      | 305.14184      | 323.96566      | 20.54214       | 20.452451      | 17.649793      | 2.468E-78 | -3.877579 | down      | PREDICTED: peroxygenase-like [Nicotiana tomentosiformis]                                          |
| c38072.graph_c0 | 7.4249856      | 7.6586546      | 7.8138746      | 14.325525      | 15.306705      | 16.200729      | 7.78E-12  | 1.041521  | up        | Lysosomal alpha-mannosidase [Glycine soja]                                                        |
| c38078.graph_c0 | 195.8512       | 224.5153       | 170.46718      | 66.268422      | 96.874967      | 90.708894      | 8.095E-10 | -1.182701 | down      | PREDICTED: polyol transporter 5-like [Sesamum indicum]                                            |
| c38081.graph_c0 | 9.1808656      | 8.7548341      | 7.9120875      | 19.150707      | 23.488921      | 29.902072      | 1.798E-08 | 1.525238  | up        | hypothetical protein VITISV_034764 [Vitis vinifera]                                               |
| c38083.graph_c0 | 26.275525      | 22.696567      | 22.694542      | 66.347802      | 71.459333      | 83.814252      | 2.085E-31 | 1.668069  | up        | PREDICTED: lysosomal beta glucosidase-like [Sesamum indicum]                                      |
| c38085.graph_c0 | 2.9759672      | 2.9912102      | 2.5200014      | 0.9964454      | 0.7540093      | 0.7599695      | 0.0001369 | -1.709272 | down      | PREDICTED: uncharacterized protein LOC105116978 [Sesamum indicum]                                 |
| c38086.graph_c0 | 5.331539       | 5.9084041      | 5.3304979      | 11.595508      | 12.917077      | 13.216673      | 3.784E-15 | 1.227096  | up        | PREDICTED: calcium-transporting ATPase, endoplasmic reticulum-type [Sesamum indicum]              |
| c38090.graph_c0 | 1.2721808      | 1.4619309      | 1.2457069      | 4.0900965      | 3.8670514      | 3.9915377      | 1.699E-10 | 1.629319  | up        | PREDICTED: DNA (cytosine-5)-methyltransferase CMT2 [Sesamum indicum]                              |
| c38104.graph_c0 | 12.749167      | 12.355146      | 12.604726      | 24.27429       | 28.344064      | 25.477412      | 3.196E-13 | 1.090305  | up        | PREDICTED: probable sulfate transporter 3.3 [Sesamum indicum]                                     |
| c38110.graph_c0 | 0.4050181      | 0.2612095      | 0.4249176      | 3.3737075      | 7.0703715      | 7.9615731      | 4.323E-08 | 4.104425  | up        | PREDICTED: uncharacterized protein LOC105116696 [Sesamum indicum]                                 |
| c38120.graph_c0 | 4.6599517      | 4.8972535      | 4.9245266      | 1.5251247      | 2.2055378      | 2.5202297      | 5.266E-05 | -1.177754 | down      | PREDICTED: pentatricopeptide repeat-containing protein At1g73400, mitochondrial [Sesamum indicum] |
| c38124.graph_c1 | 0.3168428      | 0.2622394      | 0.7540784      | 2.3427928      | 1.7373335      | 1.399662       | 0.000113  | 2.087646  | up        | PREDICTED: LOW QUALITY PROTEIN: probable WRKY transcription factor 70 [Sesamum indicum]           |
| c38128.graph_c0 | 8.2497368      | 9.3248551      | 8.0579166      | 17.680666      | 23.067825      | 26.545103      | 4.486E-10 | 1.428777  | up        | PREDICTED: protein cfxQ homolog [Sesamum indicum]                                                 |
| c38136.graph_c0 | 0.4741258      | 0.3389055      | 0.4513633      | 4.4322969      | 3.5282429      | 3.5650451      | 2.308E-19 | 3.234605  | up        | PREDICTED: glutamate receptor 2.1-like [Sesamum indicum]                                          |
| c38144.graph_c0 | 0.1161694      | 0.2307582      | 0.2275039      | 2.3560528      | 2.6831486      | 3.4328576      | 3.041E-19 | 3.920012  | up        | PREDICTED: cyclin-A2-1-like isoform X2 [Sesamum indicum]                                          |
| c38146.graph_c1 | 54.398018      | 55.534568      | 50.856767      | 125.95643      | 128.19562      | 120.24663      | 4.386E-16 | 1.261889  | up        | PREDICTED: uncharacterized protein LOC105114865 [Sesamum indicum]                                 |
| c38157.graph_c0 | 0.6924473      | 0.8857213      | 0.8632424      | 2.7307093      | 2.0921544      | 2.863656       | 2.843E-06 | 1.699098  | up        | hypothetical protein MIMGU_mgv1a002532mg [Erythranthe guttata]                                    |
| c38172.graph_c0 | 9.3505719      | 9.0188313      | 8.7714849      | 4.1063913      | 4.0536175      | 3.4877586      | 1.199E-06 | -1.176694 | down      | PREDICTED: uncharacterized GPI-anchored protein At1g61900-like [Sesamum indicum]                  |
| c38180.graph_c0 | 1.4080522      | 0.9535043      | 1.5375776      | 4.4095303      | 6.1450664      | 5.5817504      | 1.956E-12 | 2.085016  | up        | PREDICTED: polyadenylate-binding protein 7-like [Sesamum indicum]                                 |
| c38190.graph_c0 | 18.046666      | 16.545775      | 24.833448      | 55.571533      | 47.782315      | 46.150735      | 3.125E-10 | 1.375825  | up        | PREDICTED: early nodulin-like protein 2 [Sesamum indicum]                                         |

| #ID             | 28 h-1<br>FPKM | 28 h-2<br>FPKM | 28 h-3<br>FPKM | 48 h-1<br>FPKM | 48 h-2<br>FPKM | 48 h-3<br>FPKM | FDR       | log2FC    | regulated | nr_annotation                                                                                                |
|-----------------|----------------|----------------|----------------|----------------|----------------|----------------|-----------|-----------|-----------|--------------------------------------------------------------------------------------------------------------|
| c38203.graph_c0 | 0.904604       | 0.6466116      | 0.9841993      | 3.3444022      | 4.8083417      | 3.9536013      | 9.421E-09 | 2.291611  | up        | PREDICTED: psbP domain-containing protein 3, chloroplastic [Sesamum indicum]                                 |
| c38204.graph_c0 | 2.448705       | 2.6737082      | 2.0910593      | 11.477263      | 10.629364      | 10.083942      | 5.196E-11 | 2.20242   | up        | PREDICTED: uncharacterized protein LOC105164617 isoform X2 [Sesamum indicum]                                 |
| c38208.graph_c0 | 4.8204851      | 4.3638399      | 4.9116971      | 1.2956437      | 1.5589769      | 1.7790988      | 5.463E-10 | -1.567701 | down      | PREDICTED: pentatricopeptide repeat-containing protein At2g26790, mitochondrial isoform X1 [Sesamum indicum] |
| c38235.graph_c0 | 0.5355854      | 0.5158223      | 0.4078978      | 1.6293455      | 1.5822528      | 1.7719556      | 2.975E-05 | 1.813996  | up        | PREDICTED: uncharacterized protein LOC105161746 [Sesamum indicum]                                            |
| c38241.graph_c0 | 2.0586781      | 1.7426187      | 1.3648899      | 3.6968287      | 5.2409867      | 6.3853368      | 1.05E-05  | 1.603152  | up        | PREDICTED: lipid phosphate phosphatase epsilon 2, chloroplastic isoform X1 [Sesamum indicum]                 |
| c38242.graph_c0 | 5.0956875      | 5.2821589      | 4.8305242      | 12.624052      | 10.6771        | 10.905509      | 3.301E-13 | 1.214901  | up        | PREDICTED: filament-like plant protein 4 [Sesamum indicum]                                                   |
| c38245.graph_c0 | 198.70345      | 212.7585       | 178.27011      | 1403.4397      | 1078.5883      | 917.8842       | 6.498E-10 | 2.576676  | up        | PREDICTED: acyl-[acyl-carrier-protein] desaturase, chloroplastic [Sesamum indicum]                           |
| c38249.graph_c0 | 0.4833989      | 0.5819518      | 0.6574159      | 2.0084376      | 1.8752576      | 2.1808626      | 8.787E-06 | 1.857565  | up        | PREDICTED: uncharacterized protein LOC105164781 [Sesamum indicum]                                            |
| c38253.graph_c0 | 70.716043      | 69.799231      | 68.797669      | 169.80598      | 142.50287      | 114.45755      | 0.0002565 | 1.07544   | up        | PREDICTED: uncharacterized protein LOC105177769 isoform X1 [Sesamum indicum]                                 |
| c38268.graph_c0 | 2.3086819      | 2.2929756      | 2.7787017      | 5.7065274      | 6.742917       | 5.8588082      | 0.0004787 | 1.350427  | up        | hypothetical protein MIMGU_mgv1a003097mg [Erythranthe guttata]                                               |
| c38269.graph_c0 | 6.8569596      | 6.4013864      | 6.2859913      | 13.386293      | 12.447586      | 12.507789      | 8.319E-08 | 1.015754  | up        | PREDICTED: uncharacterized protein LOC105168472 [Sesamum indicum]                                            |
| c38271.graph_c0 | 0.2756159      | 0.4977106      | 0.4819292      | 2.5453621      | 2.6436299      | 2.7533445      | 1.261E-09 | 2.702631  | up        | PREDICTED: agamous-like MADS-box protein AGL12 [Sesamum indicum]                                             |
| c38277.graph_c0 | 4.9357774      | 4.380364       | 4.2685188      | 27.271755      | 28.607871      | 29.738044      | 1.33E-39  | 2.696862  | up        | PREDICTED: threonine dehydratase biosynthetic, chloroplastic [Phoenix dactylifera]                           |
| c38281.graph_c0 | 0.5166787      | 0.4382389      | 0.4343815      | 2.9967929      | 5.2351651      | 5.9334669      | 3.768E-10 | 3.381435  | up        | hypothetical protein CICLE_v10027936mg [Citrus clementina]                                                   |
| c38283.graph_c0 | 2.6797429      | 2.1848235      | 2.3987858      | 4.4867803      | 5.934786       | 7.6688442      | 2.461E-05 | 1.351284  | up        | hypothetical protein SORBIDRAFT_03g008610 [Sorghum bicolor]                                                  |
| c38284.graph_c0 | 15.997772      | 14.444488      | 16.61136       | 33.254528      | 38.940221      | 38.809015      | 4.853E-15 | 1.277137  | up        | PREDICTED: E3 ubiquitin ligase BIG BROTHER-like [Sesamum indicum]                                            |
| c38291.graph_c0 | 1.2698552      | 1.093642       | 1.370961       | 1.8572711      | 2.7545749      | 3.3051773      | 0.0012887 | 1.117287  | up        | PREDICTED: two-component response regulator ARR9 [Sesamum indicum]                                           |
| c38292.graph_c0 | 76.301069      | 76.477492      | 74.625312      | 148.27028      | 146.73046      | 149.8782       | 6.925E-12 | 1.010362  | up        | PREDICTED: UDP-glucose 4-epimerase GEPI48 [Sesamum indicum]                                                  |
| c38294.graph_c0 | 0.7986728      | 0.9134271      | 1.0427368      | 8.2339964      | 9.6524123      | 12.070809      | 5.192E-21 | 3.47984   | up        | PREDICTED: uncharacterized protein LOC105163186 [Sesamum indicum]                                            |
| c38300.graph_c0 | 76.791634      | 72.592114      | 67.247519      | 25.449114      | 32.449164      | 25.220786      | 1.283E-20 | -1.342456 | down      | PREDICTED: pollen-specific leucine-rich repeat extensin-like protein 1 [Sesamum indicum]                     |
| c38303.graph_c0 | 1.8838412      | 1.6622744      | 1.8166898      | 0.434165       | 0.2299726      | 0.6277658      | 1.803E-05 | -2.010089 | down      | PREDICTED: uncharacterized protein LOC104427989 [Eucalyptus grandis]                                         |
| c38305.graph_c0 | 2.7983452      | 2.7337453      | 2.3208601      | 0.8722398      | 0.5544194      | 0.620891       | 2.275E-05 | -1.88858  | down      | PREDICTED: probable xyloglucan endotransglucosylase/hydrolase protein 26 [Sesamum indicum]                   |
| c38306.graph_c0 | 3.6486714      | 4.2552772      | 4.4349157      | 8.9608595      | 9.0336081      | 6.301494       | 0.0009653 | 1.022289  | up        | PREDICTED: PGR5-like protein 1B, chloroplastic isoform X1 [Sesamum indicum]                                  |
| c38322.graph_c0 | 35.772509      | 37.975915      | 34.760061      | 11.514978      | 12.577779      | 12.040448      | 6.85E-24  | -1.545483 | down      | PREDICTED: protein phosphatase 2C 37-like [Sesamum indicum]                                                  |

| #ID             | 28 h-1<br>FPKM | 28 h-2<br>FPKM | 28 h-3<br>FPKM | 48 h-1<br>FPKM | 48 h-2<br>FPKM | 48 h-3<br>FPKM | FDR       | log2FC    | regulated | nr_annotation                                                                          |
|-----------------|----------------|----------------|----------------|----------------|----------------|----------------|-----------|-----------|-----------|----------------------------------------------------------------------------------------|
| c38327.graph_c0 | 140.10048      | 161.33054      | 153.7128       | 56.98182       | 57.5396        | 59.637188      | 3.468E-19 | -1.344212 | down      | PREDICTED: ent-kaurenoic acid oxidase 1-like [Sesamum indicum]                         |
| c38328.graph_c0 | 3.8791703      | 3.9453181      | 4.3883556      | 1.0965768      | 1.7980299      | 1.8333732      | 2.835E-13 | -1.33617  | down      | PREDICTED: uncharacterized protein LOC104091985 isoform X3 [Nicotiana tomentosiformis] |
| c38331.graph_c0 | 22.73741       | 21.279793      | 27.288037      | 345.52517      | 391.2841       | 449.21681      | 2.002E-96 | 4.09414   | up        | PREDICTED: raucatriicine-O-beta-D-glucosidase-like [Sesamum indicum]                   |
| c38336.graph_c0 | 26.4384        | 24.086696      | 26.510863      | 78.926563      | 59.397738      | 51.637527      | 0.0001565 | 1.351233  | up        | PREDICTED: ankyrin repeat-containing protein At5g02620 [Sesamum indicum]               |
| c38337.graph_c0 | 0.5504152      | 1.0560682      | 0.8982686      | 2.3983154      | 1.4320447      | 3.1040097      | 0.0054488 | 1.513502  | up        | PREDICTED: nicotianamine aminotransferase A-like [Sesamum indicum]                     |
| c38340.graph_c0 | 1.0823247      | 0.6701059      | 0.4289674      | 9.8386714      | 11.004235      | 13.183903      | 1.021E-40 | 4.002436  | up        | PREDICTED: protein NRT1/ PTR FAMILY 4.5-like, partial [Sesamum indicum]                |
| c38344.graph_c0 | 0.7326921      | 0.6615523      | 0.8113961      | 21.891758      | 10.541665      | 8.8541611      | 0.0002053 | 4.285497  | up        | PREDICTED: uncharacterized protein LOC105175288 [Sesamum indicum]                      |
| c38345.graph_c0 | 1.0015991      | 1.6554204      | 1.7592657      | 0.2582238      | 0.2735569      | 0.3255019      | 5.624E-07 | -2.325659 | down      | PREDICTED: uncharacterized protein LOC105160841 isoform X1 [Sesamum indicum]           |
| c38355.graph_c0 | 14.78354       | 13.197608      | 14.285426      | 6.8334772      | 8.5826048      | 4.5759613      | 0.0001782 | -1.038063 | down      | hypothetical protein MIMGU_mgv1a006265mg [Erythranthe guttata]                         |
| c38356.graph_c0 | 0.4141885      | 0.3902331      | 0.5583925      | 1.7804835      | 1.450928       | 1.5639525      | 5.323E-06 | 1.860022  | up        | PREDICTED: 65-kDa microtubule-associated protein 5 [Sesamum indicum]                   |
| c38360.graph_c0 | 5.4898192      | 5.1846905      | 5.09753        | 14.637371      | 14.489699      | 15.301708      | 1.92E-07  | 1.536026  | up        | unnamed protein product [Coffea canephora]                                             |
| c38360.graph_c1 | 2.8012168      | 2.3116674      | 2.7527553      | 7.0633171      | 6.2288655      | 8.9347456      | 7.905E-08 | 1.539619  | up        | PREDICTED: auxin transporter-like protein 3 [Sesamum indicum]                          |
| c38361.graph_c0 | 7.0567775      | 6.9434195      | 7.2347531      | 17.316574      | 16.340245      | 16.811247      | 3.715E-13 | 1.291908  | up        | PREDICTED: uncharacterized protein LOC105175065 [Sesamum indicum]                      |
| c38376.graph_c0 | 1.4037023      | 1.9011174      | 1.1999529      | 3.092586       | 4.2635738      | 4.2972759      | 0.0001379 | 1.408089  | up        | -                                                                                      |
| c38376.graph_c1 | 2.4023554      | 2.3046705      | 2.5483931      | 4.6058081      | 6.2906616      | 6.028787       | 6.989E-05 | 1.258508  | up        | PREDICTED: receptor-like serine/threonine-protein kinase ALE2 [Sesamum indicum]        |
| c38383.graph_c0 | 0.9232406      | 1.2314541      | 1.1985222      | 4.2821444      | 4.8745305      | 5.5851765      | 2.075E-12 | 2.174822  | up        | PREDICTED: transcription factor LHW-like [Sesamum indicum]                             |
| c38383.graph_c1 | 1.0193466      | 0.9482645      | 1.0586272      | 5.8731676      | 4.6042126      | 5.1213911      | 9.206E-12 | 2.411756  | up        | PREDICTED: transcription factor LHW-like [Sesamum indicum]                             |
| c38403.graph_c0 | 1.8891622      | 1.4433154      | 3.6759822      | 4.9735084      | 7.4153891      | 9.3425067      | 0.0004542 | 1.664142  | up        | PREDICTED: 2-hydroxyisoflavanone dehydratase [Sesamum indicum]                         |
| c38404.graph_c0 | 0.6462977      | 0.8753193      | 0.3691615      | 4.3692262      | 6.219769       | 6.8034945      | 4.492E-21 | 3.237697  | up        | PREDICTED: phosphoinositide phosphoinipase C 2-like [Sesamum indicum]                  |
| c38406.graph_c0 | 0.9097066      | 0.4693599      | 0.7574624      | 1.882645       | 1.4708952      | 2.5546285      | 0.0002    | 1.508343  | up        | PREDICTED: potassium channel SKOR-like [Sesamum indicum]                               |
| c38410.graph_c0 | 0.4552564      | 0.6850898      | 0.6191426      | 1.1541421      | 1.5894757      | 2.4646769      | 0.0027705 | 1.5986    | up        | PREDICTED: MLO-like protein 11 [Sesamum indicum]                                       |
| c38418.graph_c0 | 36.756072      | 48.501215      | 51.87033       | 118.6634       | 106.39152      | 84.351553      | 1.497E-05 | 1.220159  | up        | hypothetical protein MIMGU_mgv1a006647mg [Erythranthe guttata]                         |
| c38429.graph_c0 | 0.4143375      | 0.3928134      | 0.6761921      | 7.1690259      | 7.0105049      | 9.7904125      | 1.834E-30 | 4.052846  | up        | PREDICTED: kinesin-like protein KIN12A isoform X2 [Sesamum indicum]                    |
| c38442.graph_c0 | 1177.8314      | 1132.3058      | 1260.0717      | 271.84924      | 272.96111      | 255.04368      | 1.223E-38 | -2.11574  | down      | --                                                                                     |
| c38443.graph_c0 | 5.6098524      | 5.0651708      | 5.340526       | 0.4740601      | 0.7533137      | 0.4218158      | 3.851E-10 | -3.242418 | down      | unnamed protein product [Vitis vinifera]                                               |
| c38447.graph_c1 | 1.1427845      | 1.0963165      | 1.3113321      | 5.2510427      | 5.778643       | 5.9008511      | 1.964E-16 | 2.293358  | up        | PREDICTED: uncharacterized protein LOC105178397 [Sesamum indicum]                      |

| #ID             | 28 h-1<br>FPKM | 28 h-2<br>FPKM | 28 h-3<br>FPKM | 48 h-1<br>FPKM | 48 h-2<br>FPKM | 48 h-3<br>FPKM | FDR       | log2FC    | regulated | nr_annotation                                                                                             |
|-----------------|----------------|----------------|----------------|----------------|----------------|----------------|-----------|-----------|-----------|-----------------------------------------------------------------------------------------------------------|
| c38449.graph_c0 | 12.369453      | 15.319564      | 10.629304      | 2.2200627      | 3.1848473      | 2.5515564      | 1.431E-14 | -2.230225 | down      | PREDICTED: probably inactive leucine-rich repeat receptor-like protein kinase At5g48380 [Sesamum indicum] |
| c38457.graph_c0 | 15.517231      | 12.36455       | 16.156074      | 2.0959018      | 1.4233038      | 1.1476436      | 7.663E-27 | -3.186458 | down      | -                                                                                                         |
| c38464.graph_c0 | 0.7040139      | 1.1078621      | 0.9191514      | 6.7311664      | 9.5618278      | 10.073         | 3.588E-26 | 3.306722  | up        | PREDICTED: cation/H(+) antiporter 14 isoform X1 [Nicotiana tomentosiformis]                               |
| c38473.graph_c0 | 94.613216      | 94.307395      | 93.603926      | 46.142259      | 36.320642      | 34.304688      | 4.15E-17  | -1.227156 | down      | hypothetical protein CISIN_1g011138mg [Citrus sinensis]                                                   |
| c38488.graph_c0 | 20.522962      | 22.806536      | 23.284173      | 60.93365       | 56.602083      | 57.690509      | 1.614E-21 | 1.438725  | up        | PREDICTED: uncharacterized protein LOC105115140 [Sesamum indicum]                                         |
| c38491.graph_c1 | 0.4308951      | 0.3760892      | 0.5039698      | 6.1719609      | 5.4776347      | 8.0027617      | 2.219E-27 | 3.946431  | up        | PREDICTED: probably inactive leucine-rich repeat receptor-like protein kinase IMK2 [Sesamum indicum]      |
| c38493.graph_c0 | 0.7093319      | 0.6117829      | 0.7602268      | 2.8315898      | 2.6869584      | 2.8777588      | 2.469E-12 | 2.054464  | up        | PREDICTED: structural maintenance of chromosomes protein 2-1 [Sesamum indicum]                            |
| c38494.graph_c0 | 1.9440221      | 2.6230434      | 2.1388397      | 1.2459393      | 0.7626214      | 0.7883586      | 0.0017155 | -1.209142 | down      | Putative gag-pol polyprotein, identical [Solanum demissum]                                                |
| c38495.graph_c0 | 4.0298897      | 3.5519789      | 4.3844761      | 10.094741      | 9.9210822      | 12.769931      | 6.294E-05 | 1.493945  | up        | PREDICTED: cytochrome c oxidase subunit 5b-1, mitochondrial-like [Sesamum indicum]                        |
| c38496.graph_c0 | 102.01061      | 98.380126      | 104.15435      | 194.42822      | 202.07241      | 228.89075      | 7.471E-14 | 1.078315  | up        | PREDICTED: ADP,ATP carrier protein, mitochondrial [Sesamum indicum]                                       |
| c38509.graph_c0 | 6.9177222      | 7.3346526      | 6.3544374      | 1.7036375      | 4.1404174      | 3.9011782      | 4.514E-05 | -1.052233 | down      | PREDICTED: sulfate transporter 3.1-like [Sesamum indicum]                                                 |
| c38512.graph_c0 | 1.1690418      | 1.2666421      | 1.090204       | 3.5987702      | 4.7095102      | 3.9556144      | 9.995E-07 | 1.836967  | up        | PREDICTED: microtubule-associated protein RP/EB family member 1B [Sesamum indicum]                        |
| c38514.graph_c0 | 3.1229374      | 2.9770994      | 3.2357375      | 5.8918001      | 6.2221426      | 6.2746032      | 4.477E-06 | 1.018831  | up        | PREDICTED: serine/threonine-protein kinase DOPK [Sesamum indicum]                                         |
| c38516.graph_c0 | 5.9337297      | 5.7520262      | 6.5944554      | 11.236015      | 12.22094       | 12.235426      | 4.603E-08 | 1.005593  | up        | PREDICTED: uncharacterized protein LOC105155825 [Sesamum indicum]                                         |
| c38532.graph_c0 | 8.444834       | 10.88439       | 9.6656927      | 3.5545308      | 4.6961723      | 5.2713336      | 5.57E-08  | -1.064281 | down      | PREDICTED: autophagy-related protein 15 isoform X2 [Sesamum indicum]                                      |
| c38550.graph_c0 | 65.279875      | 64.472642      | 61.374293      | 30.249431      | 33.154325      | 27.336321      | 6.751E-13 | -1.032728 | down      | PREDICTED: N-(5'-phosphoribosyl)anthranilate isomerase 1, chloroplastic isoform X2 [Sesamum indicum]      |
| c38571.graph_c0 | 18.904266      | 19.151079      | 18.942188      | 5.8252679      | 8.36385        | 9.2653653      | 7.417E-15 | -1.24631  | down      | PREDICTED: cation/H(+) antiporter 18-like [Sesamum indicum]                                               |
| c38572.graph_c0 | 18.599656      | 17.666148      | 17.739546      | 8.0046148      | 8.8969639      | 7.6673456      | 8.682E-08 | -1.094983 | down      | PREDICTED: cyclin-dependent kinase F-4-like [Sesamum indicum]                                             |
| c38593.graph_c0 | 10.864898      | 9.4435192      | 10.699944      | 30.710107      | 34.3364        | 38.277064      | 1.74E-28  | 1.775317  | up        | PREDICTED: long chain acyl-CoA synthetase 6, peroxisomal-like isoform X2 [Sesamum indicum]                |
| c38596.graph_c0 | 3.0643548      | 4.4829571      | 3.5133446      | 8.6044519      | 7.9173529      | 7.5249406      | 0.0001579 | 1.165067  | up        | PREDICTED: uncharacterized protein LOC105168232 isoform X2 [Sesamum indicum]                              |
| c38601.graph_c0 | 0.5318934      | 0.4802499      | 0.6912181      | 0.2996507      | 0.1322682      | 0.1999705      | 0.0021722 | -1.376255 | down      | -                                                                                                         |
| c38619.graph_c0 | 1.8532744      | 2.7251424      | 2.7652696      | 5.3359533      | 7.0393303      | 6.1513662      | 4.096E-06 | 1.372879  | up        | PREDICTED: uncharacterized protein LOC105177754 isoform X2 [Sesamum indicum]                              |
| c38642.graph_c0 | 2.567233       | 2.683966       | 1.8192042      | 5.7804103      | 4.762834       | 4.5718883      | 0.0008262 | 1.143211  | up        | hypothetical protein MIMGU_mgv1a025521mg [Erythranthe guttata]                                            |
| c38644.graph_c0 | 55.519061      | 60.974493      | 57.740861      | 10.961361      | 11.431498      | 12.751466      | 5.531E-49 | -2.269207 | down      | PREDICTED: pheophytinase, chloroplastic [Sesamum indicum]                                                 |



| #ID             | 28 h-1<br>FPKM | 28 h-2<br>FPKM | 28 h-3<br>FPKM | 48 h-1<br>FPKM | 48 h-2<br>FPKM | 48 h-3<br>FPKM | FDR       | log2FC    | regulated | nr_annotation                                                                                                 |
|-----------------|----------------|----------------|----------------|----------------|----------------|----------------|-----------|-----------|-----------|---------------------------------------------------------------------------------------------------------------|
| c38667.graph_c0 | 3.9592276      | 6.3424072      | 3.4391295      | 13.436931      | 12.519763      | 9.5072602      | 0.0004164 | 1.414791  | up        | -                                                                                                             |
| c38681.graph_c1 | 4.6304095      | 4.3523467      | 3.352098       | 17.126565      | 19.737852      | 18.211947      | 5.017E-32 | 2.199168  | up        | PREDICTED: 3-ketoacyl-CoA synthase 12 [Sesamum indicum]                                                       |
| c38703.graph_c0 | 3.6961025      | 4.3626411      | 3.9763883      | 9.1084278      | 8.0133345      | 10.386961      | 1.518E-08 | 1.235049  | up        | PREDICTED: BTB/POZ domain-containing protein NPY2 [Sesamum indicum]                                           |
| c38732.graph_c2 | 6.1657113      | 6.2629416      | 6.3675746      | 0.8548196      | 1.4230506      | 1.6842152      | 1.537E-08 | -2.214249 | down      | PREDICTED: probable sucrose-phosphate synthase 1 isoform X1 [Sesamum indicum]                                 |
| c38737.graph_c0 | 1.1220343      | 1.1197331      | 0.807148       | 2.8445223      | 3.0332517      | 4.2794539      | 8.918E-09 | 1.774524  | up        | PREDICTED: beta-1,3-galactosyltransferase 15 [Sesamum indicum]                                                |
| c38740.graph_c1 | 0.1798579      | 0.3247897      | 0              | 10.943192      | 15.215793      | 13.794347      | 3.09E-24  | 6.346833  | up        | -                                                                                                             |
| c38744.graph_c2 | 0.6406718      | 0.7230832      | 0.8588577      | 2.2622749      | 2.9496688      | 2.554909       | 1.832E-06 | 1.842949  | up        | PREDICTED: uncharacterized protein LOC105160721 [Sesamum indicum]                                             |
| c38757.graph_c0 | 20.003617      | 21.977506      | 21.11284       | 42.820932      | 53.773547      | 54.548631      | 1.347E-19 | 1.298106  | up        | PREDICTED: uncharacterized protein At5g02240 [Sesamum indicum]                                                |
| c38761.graph_c0 | 2.4710635      | 2.3905057      | 2.1603939      | 13.312083      | 12.996457      | 15.72699       | 3.953E-28 | 2.62274   | up        | PREDICTED: putative glucose-6-phosphate 1-epimerase [Sesamum indicum]                                         |
| c38791.graph_c0 | 35.487531      | 37.657031      | 35.78272       | 68.292022      | 80.989673      | 86.230156      | 8.164E-15 | 1.150879  | up        | PREDICTED: probable methyltransferase PMT26 [Sesamum indicum]                                                 |
| c38792.graph_c0 | 0.2881985      | 0              | 0.1175838      | 3.1051588      | 2.9992858      | 3.4943212      | 5.046E-17 | 4.604299  | up        | PREDICTED: uncharacterized protein LOC105110255 [Populus euphratica]                                          |
| c38803.graph_c0 | 0.9404563      | 1.0614298      | 1.3429581      | 0.1862653      | 0.434116       | 0.4972131      | 0.0006932 | -1.554537 | down      | -                                                                                                             |
| c38847.graph_c0 | 6.6263262      | 6.6303602      | 7.1219437      | 26.921818      | 26.52829       | 22.672073      | 4.127E-31 | 1.944895  | up        | hypothetical protein EUGRSUZ_J00099 [Eucalyptus grandis]                                                      |
| c38855.graph_c0 | 2.9368096      | 3.1633882      | 3.4474708      | 17.306929      | 15.082797      | 12.261569      | 8.472E-13 | 2.272044  | up        | PREDICTED: UDP-N-acetylglucosamine--peptide N-acetylglucosaminyltransferase 110 kDa subunit [Sesamum indicum] |
| c38860.graph_c0 | 0.2438637      | 0.1223256      | 0.1989908      | 0.8929996      | 1.2371093      | 1.0085125      | 3.555E-08 | 2.510249  | up        | PREDICTED: probable indole-3-pyruvate monooxygenase YUCCA4 [Sesamum indicum]                                  |
| c38873.graph_c1 | 7.527985       | 6.3639183      | 7.2870165      | 3.5081895      | 2.8740944      | 2.8302198      | 0.000277  | -1.154828 | down      | PREDICTED: raucaltricine-O-beta-D-glucosidase-like [Sesamum indicum]                                          |
| c38886.graph_c0 | 0.634076       | 0.9092824      | 0.8521896      | 5.7680022      | 10.217556      | 13.083244      | 6.013E-08 | 3.631588  | up        | hypothetical protein MIMGU_mgv1a025829mg, partial [Erythranthe ontata]                                        |
| c38888.graph_c0 | 23.995682      | 22.154135      | 22.681858      | 57.933933      | 47.63849       | 41.702973      | 1.347E-05 | 1.144665  | up        | PREDICTED: putative zinc transporter At3g08650 [Sesamum indicum]                                              |
| c38892.graph_c0 | 0.135513       | 0.0917667      | 0              | 2.0612725      | 1.9107097      | 2.6747407      | 7.614E-20 | 4.91277   | up        | PREDICTED: peroxidase 19 [Sesamum indicum]                                                                    |
| c38893.graph_c0 | 1.3449056      | 1.7381496      | 1.1404685      | 0.0668536      | 0.0354116      | 0.0594859      | 2.297E-15 | -4.656111 | down      | -                                                                                                             |
| c38900.graph_c0 | 1.8346447      | 1.4140957      | 1.2049468      | 4.1406085      | 2.884256       | 4.2394553      | 0.0004566 | 1.3846    | up        | hypothetical protein AMTR_s00334p00011530 [Amborella trichopoda]                                              |
| c38916.graph_c0 | 31.509662      | 32.157886      | 34.1682        | 7.1525223      | 8.2149178      | 8.254649       | 1.407E-34 | -2.010905 | down      | PREDICTED: uncharacterized acetyltransferase At3g50280-like [Sesamum indicum]                                 |
| c38937.graph_c0 | 3.0902335      | 3.5360838      | 2.7712692      | 8.571077       | 9.3265331      | 11.042885      | 2.548E-10 | 1.662184  | up        | PREDICTED: calcium sensing receptor, chloroplastic [Sesamum indicum]                                          |
| c38938.graph_c0 | 15.980243      | 12.941867      | 15.788172      | 4.6489489      | 5.4778035      | 5.5717561      | 1.198E-09 | -1.471431 | down      | PREDICTED: EPIDERMAL PATTERNING FACTOR-like protein 2 [Sesamum indicum]                                       |
| c38952.graph_c0 | 8.5686342      | 7.3682603      | 8.0740208      | 3.0601493      | 3.4701569      | 4.1418798      | 0.0001558 | -1.131741 | down      | hypothetical protein MIMGU_mgv1a006823mg [Erythranthe guttata]                                                |
| c38963.graph_c0 | 40.966715      | 39.7133        | 39.052625      | 188.31036      | 158.196        | 127.62712      | 2.065E-09 | 2.033078  | up        | PREDICTED: uncharacterized protein LOC105111109 [Sesamum indicum]                                             |

| #ID             | 28 h-1<br>FPKM | 28 h-2<br>FPKM | 28 h-3<br>FPKM | 48 h-1<br>FPKM | 48 h-2<br>FPKM | 48 h-3<br>FPKM | FDR       | log2FC    | regulated | nr_annotation                                                                                  |
|-----------------|----------------|----------------|----------------|----------------|----------------|----------------|-----------|-----------|-----------|------------------------------------------------------------------------------------------------|
| c38995.graph_c0 | 31.255019      | 28.977945      | 29.721877      | 9.4202046      | 12.836617      | 11.761897      | 1.223E-20 | -1.365909 | down      | PREDICTED: SNF2 domain-containing protein CLASSY 3-like [Sesamum indicum]                      |
| c39001.graph_c0 | 0              | 0.0453616      | 0              | 1.6875813      | 2.0239107      | 2.5498862      | 6.721E-27 | 7.15044   | up        | PREDICTED: putative UDP-glucuronate:xylan alpha-glucuronosyltransferase 4 [Sesamum indicum]    |
| c39033.graph_c0 | 26.547831      | 28.503427      | 28.172881      | 12.379505      | 7.1114297      | 4.5767419      | 4.875E-13 | -1.732128 | down      | hypothetical protein MIMGU_mgv1a025187mg [Erythranthe guttata]                                 |
| c39040.graph_c0 | 10.862811      | 9.1431439      | 9.2645963      | 18.437011      | 26.124782      | 23.050262      | 1.997E-07 | 1.244399  | up        | PREDICTED: uncharacterized protein LOC105178874 isoform X1 [Sesamum indicum]                   |
| c39068.graph_c0 | 12.137957      | 14.353591      | 13.242922      | 3.5402545      | 5.2101129      | 6.1469464      | 1.567E-15 | -1.381373 | down      | PREDICTED: protein NRT1/ PTR FAMILY 5.8 [Nicotiana glauca]                                     |
| c39102.graph_c1 | 370.04556      | 377.49273      | 381.13271      | 41.494126      | 32.747232      | 28.826638      | 7.48E-109 | -3.404828 | down      | 15 kDa oleosin [Sesamum indicum]                                                               |
| c39123.graph_c0 | 0.3266813      | 0.3754069      | 0.3877371      | 2.6351349      | 5.0647707      | 4.8234387      | 1.168E-10 | 3.553471  | up        | PREDICTED: probable 1-deoxy-D-xylulose-5-phosphate synthase 2, chloroplastic [Sesamum indicum] |
| c39124.graph_c0 | 0.1331799      | 0.6012449      | 0.173878       | 0.7765507      | 2.2176087      | 1.6222777      | 0.0035125 | 2.37467   | up        | PREDICTED: aspartic proteinase-like protein 2 isoform X2 [Sesamum indicum]                     |
| c39138.graph_c0 | 0.2566151      | 0.270316       | 0.2617448      | 2.6022286      | 5.2263302      | 5.8368568      | 2.605E-09 | 4.144546  | up        | PREDICTED: COBRA-like protein 4 [Sesamum indicum]                                              |
| c39138.graph_c1 | 0.0876207      | 0.0791133      | 0.3574889      | 9.218453       | 19.884648      | 24.21227       | 3.017E-11 | 6.693597  | up        | hypothetical protein MIMGU_mgv1a006245mg [Erythranthe guttata]                                 |
| c39142.graph_c0 | 11.036172      | 14.832844      | 12.373868      | 5.1257993      | 5.8826764      | 6.8413581      | 7.069E-05 | -1.060755 | down      | PREDICTED: uncharacterized protein LOC105155595 [Sesamum indicum]                              |
| c39146.graph_c0 | 7.9272921      | 7.2438377      | 7.2089882      | 16.676756      | 18.757161      | 22.137127      | 3.007E-16 | 1.401618  | up        | PREDICTED: phytoene synthase 2, chloroplastic [Sesamum indicum]                                |
| c39147.graph_c0 | 0.2977188      | 0.2837462      | 0.3644042      | 1.6982124      | 1.9989446      | 1.9587805      | 6.704E-11 | 2.618788  | up        | hypothetical protein MIMGU_mgv1a023002mg [Erythranthe guttata]                                 |
| c39170.graph_c0 | 5.6073413      | 4.9645946      | 5.9970731      | 2.346237       | 1.973822       | 2.3946775      | 0.0013892 | -1.259587 | down      | PREDICTED: protein REVEILLE 6 isoform X2 [Nicotiana glauca]                                    |
| c39200.graph_c0 | 0.1479982      | 0.2895283      | 0.221403       | 1.2506572      | 0.7618288      | 0.7511584      | 0.0003212 | 2.121522  | up        | hypothetical protein MIMGU_mgv1a005105mg [Erythranthe guttata]                                 |
| c39211.graph_c0 | 0.1347397      | 0.1419335      | 0.219893       | 1.024755       | 1.1760706      | 0.9371492      | 5.734E-09 | 2.700214  | up        | PREDICTED: uncharacterized protein LOC105159159 [Sesamum indicum]                              |
| c39225.graph_c0 | 29.656143      | 30.740759      | 29.678228      | 55.104875      | 59.215018      | 63.887222      | 9.814E-13 | 1.024504  | up        | PREDICTED: serine hydroxymethyltransferase, mitochondrial [Sesamum indicum]                    |
| c39231.graph_c0 | 19.073711      | 19.943653      | 22.488071      | 55.690424      | 57.273062      | 79.545059      | 3.866E-10 | 1.684569  | up        | PREDICTED: glucose-1-phosphate adenylyltransferase large subunit 1 [Sesamum indicum]           |
| c39252.graph_c0 | 8.4735128      | 9.1256382      | 9.1010742      | 28.243132      | 30.468539      | 34.399805      | 1.581E-31 | 1.841731  | up        | hypothetical protein MIMGU_mgv1a009282mg [Erythranthe guttata]                                 |
| c39260.graph_c0 | 2.0327391      | 2.0189101      | 2.5591349      | 11.521291      | 12.244406      | 16.605587      | 3.915E-18 | 2.648289  | up        | PREDICTED: probable galactinol--sucrose galactosyltransferase 2 [Sesamum indicum]              |
| c39271.graph_c0 | 15.051579      | 13.747824      | 14.33371       | 37.051301      | 34.983889      | 42.263669      | 4.184E-20 | 1.447448  | up        | PREDICTED: glycerophosphodiester phosphodiesterase GDPD1, chloroplastic-like [Sesamum indicum] |
| c39285.graph_c0 | 30.014473      | 34.604394      | 39.372923      | 14.728922      | 14.968788      | 18.658972      | 8.085E-09 | -1.065068 | down      | hypothetical protein MIMGU_mgv11b009377mg [Erythranthe guttata]                                |
| c39313.graph_c0 | 0.3408185      | 0.6154542      | 0              | 3.5641032      | 2.9748217      | 3.2674181      | 2.704E-12 | 3.406375  | up        | PREDICTED: malate dehydrogenase, cytoplasmic-like [Sesamum indicum]                            |
| c39334.graph_c0 | 0.0184957      | 0              | 0              | 1.7114559      | 1.4902027      | 2.0235039      | 7.671E-30 | 8.184529  | up        | hypothetical protein MIMGU_mgv1a002051mg [Erythranthe guttata]                                 |

| #ID             | 28 h-1<br>FPKM | 28 h-2<br>FPKM | 28 h-3<br>FPKM | 48 h-1<br>FPKM | 48 h-2<br>FPKM | 48 h-3<br>FPKM | FDR       | log2FC    | regulated | nr_annotation                                                                                     |
|-----------------|----------------|----------------|----------------|----------------|----------------|----------------|-----------|-----------|-----------|---------------------------------------------------------------------------------------------------|
| c39349.graph_c0 | 0.0994866      | 0.1197695      | 0.1082404      | 2.900453       | 1.8257943      | 1.0846864      | 9.875E-05 | 4.20572   | up        | PREDICTED: glucan endo-1,3-beta-glucosidase 14 isoform X1 [Sesamum indicum]                       |
| c39362.graph_c0 | 9.1140556      | 7.6339485      | 8.8402015      | 23.541426      | 21.013658      | 23.274466      | 1.234E-16 | 1.4497    | up        | PREDICTED: U-box domain-containing protein 4 [Sesamum indicum]                                    |
| c39383.graph_c0 | 19.009276      | 21.137715      | 20.248121      | 9.3188744      | 6.9598063      | 9.2631614      | 1.08E-14  | -1.196228 | down      | PREDICTED: probable auxin efflux carrier component 1c [Sesamum indicum]                           |
| c39384.graph_c0 | 17.168687      | 15.986143      | 17.171377      | 30.301364      | 34.582215      | 36.913023      | 3.795E-08 | 1.055246  | up        | PREDICTED: two-on-two hemoglobin-3 [Sesamum indicum]                                              |
| c39389.graph_c0 | 35.816748      | 34.195437      | 42.663307      | 8.0734473      | 6.5499585      | 7.6838362      | 1.162E-32 | -2.292101 | down      | hypothetical protein MIMGU_mgv1a004314mg [Erythranthe guttata]                                    |
| c39403.graph_c0 | 0.1421282      | 0.146661       | 0.1822471      | 0.8493159      | 0.7634219      | 1.4885318      | 1.945E-05 | 2.756273  | up        | PREDICTED: uncharacterized protein LOC105155966 isoform X1 [Sesamum indicum]                      |
| c39418.graph_c0 | 11.292278      | 8.5985159      | 10.473709      | 1.908506       | 2.8811087      | 2.97181        | 8.882E-11 | -1.933891 | down      | PREDICTED: metal transporter Nramp3-like isoform X1 [Sesamum indicum]                             |
| c39418.graph_c2 | 6.0063936      | 5.7391254      | 7.0424552      | 1.8479481      | 1.8010628      | 2.1704669      | 2.858E-05 | -1.650227 | down      | PREDICTED: metal transporter Nramp3-like isoform X2 [Sesamum indicum]                             |
| c39433.graph_c0 | 5.8459617      | 7.1383471      | 6.5420667      | 2.6112087      | 3.6634241      | 3.2025765      | 0.0072939 | -1.005948 | down      | PREDICTED: peroxisome biogenesis factor 10-like [Sesamum indicum]                                 |
| c39485.graph_c0 | 5.5972377      | 4.7217807      | 4.767328       | 10.202171      | 11.411454      | 11.474009      | 1.6E-05   | 1.172979  | up        | PREDICTED: monothiol glutaredoxin-S10-like isoform X1 [Sesamum indicum]                           |
| c39522.graph_c0 | 39.313446      | 38.327354      | 36.783125      | 14.919234      | 14.21813       | 12.159724      | 1.083E-21 | -1.425765 | down      | hypothetical protein MIMGU_mgv1a011861mg [Erythranthe guttata]                                    |
| c39525.graph_c0 | 20.588444      | 16.692554      | 18.217146      | 106.59089      | 174.49582      | 201.72502      | 6.332E-11 | 3.153141  | up        | PREDICTED: WAI1-related protein At2g57400-like [Sesamum indicum]                                  |
| c39546.graph_c0 | 0.263589       | 0.1851081      | 0.286782       | 1.1508526      | 1.2585175      | 1.0570547      | 4.912E-07 | 2.277824  | up        | PREDICTED: flavin-containing monooxygenase FMO GS-OX-like 9 [Sesamum indicum]                     |
| c39590.graph_c0 | 0.9345474      | 0.675047       | 0.991358       | 0.3257671      | 0.3137371      | 0.3952713      | 0.0048062 | -1.289525 | down      | PREDICTED: pentatricopeptide repeat-containing protein At3g09040, mitochondrial [Sesamum indicum] |
| c39629.graph_c0 | 0.4049163      | 0.4160292      | 0.3076216      | 0.7079465      | 1.4624677      | 1.4173346      | 0.0004255 | 1.699026  | up        | PREDICTED: FK506-binding protein 5 [Solanum lycopersicum]                                         |
| c39645.graph_c0 | 0.1659067      | 0.2995965      | 0.1353786      | 1.6823922      | 3.490319       | 3.8672047      | 1.051E-07 | 3.941631  | up        | PREDICTED: transcription factor MYB48 [Sesamum indicum]                                           |
| c39655.graph_c0 | 6.4081993      | 5.4288425      | 6.3910468      | 32.290894      | 36.86421       | 35.335305      | 4.472E-25 | 2.558807  | up        | PREDICTED: UDP-arabinose 4-epimerase 1-like [Sesamum indicum]                                     |
| c39655.graph_c1 | 6.6632778      | 4.062966       | 5.5784057      | 22.267242      | 32.304755      | 27.816643      | 1.872E-17 | 2.373059  | up        | PREDICTED: probable UDP-arabinose 4-epimerase 3 [Sesamum indicum]                                 |
| c39661.graph_c0 | 0.4181847      | 0.3985583      | 0.3981078      | 0.6773243      | 1.2479008      | 1.4673926      | 0.0014635 | 1.512073  | up        | PREDICTED: uncharacterized protein LOC10511946 [Sesamum indicum]                                  |
| c39674.graph_c0 | 3.9341716      | 4.5398697      | 4.9171663      | 1.2163054      | 1.9585627      | 1.7532632      | 2.773E-06 | -1.408067 | down      | PREDICTED: auxin response factor 18-like [Sesamum indicum]                                        |
| c39679.graph_c0 | 3.5746409      | 4.7045871      | 4.0210066      | 8.0126596      | 9.4105083      | 9.8174589      | 4.907E-08 | 1.186035  | up        | PREDICTED: fatty acid amide hydrolase [Sesamum indicum]                                           |
| c39687.graph_c1 | 11.160263      | 11.97926       | 9.9345641      | 28.886469      | 27.143299      | 25.174863      | 7.69E-08  | 1.340213  | up        | RuBisCO large subunit-binding protein subunit beta, chloroplastic [Gossypium arboreum]            |
| c39714.graph_c0 | 6.6117982      | 7.5149673      | 6.2837901      | 2.8593799      | 4.0737064      | 2.6319921      | 0.0085792 | -1.054656 | down      | PREDICTED: zinc finger protein MAGPIE-like [Sesamum indicum]                                      |
| c39715.graph_c2 | 54.080931      | 55.707152      | 55.125621      | 244.98385      | 268.86927      | 285.04425      | 5.43E-50  | 2.316156  | up        | PREDICTED: glutamate decarboxylase [Sesamum indicum]                                              |
| c39733.graph_c0 | 1.4358941      | 1.3962068      | 1.4781167      | 0.448025       | 0.4449639      | 0.5730593      | 0.0005113 | -1.515923 | down      | unnamed protein product [Coffea canephora]                                                        |
| c39735.graph_c0 | 11.066575      | 11.271066      | 7.224188       | 5.1621933      | 4.874292       | 2.5962066      | 0.0017573 | -1.177714 | down      | -                                                                                                 |
| c39758.graph_c0 | 10.642222      | 4.9781195      | 7.0099484      | 2.1128602      | 0.5165352      | 2.7477074      | 0.0033815 | -2.024748 | down      | hypothetical protein M569_00228 [Genlisea aurea]                                                  |

| #ID             | 28 h-1<br>FPKM | 28 h-2<br>FPKM | 28 h-3<br>FPKM | 48 h-1<br>FPKM | 48 h-2<br>FPKM | 48 h-3<br>FPKM | FDR       | log2FC    | regulated | nr_annotation                                                                         |
|-----------------|----------------|----------------|----------------|----------------|----------------|----------------|-----------|-----------|-----------|---------------------------------------------------------------------------------------|
| c39764.graph_c0 | 22.640779      | 23.161197      | 22.490928      | 0.8807833      | 1.4773816      | 0.718406       | 6.313E-44 | -4.435265 | down      | PREDICTED: putative cytochrome c oxidase subunit 6b-like isoform X2 [Sesamum indicum] |
| c39766.graph_c0 | 0.0178489      | 0.0644634      | 0.0728226      | 4.1403284      | 5.2490302      | 4.8919211      | 1.885E-50 | 6.562248  | up        | PREDICTED: beta-amyrin synthase [Sesamum indicum]                                     |
| c39771.graph_c0 | 0.1349619      | 0.121858       | 0.1321534      | 0.7869412      | 1.087394       | 1.7657609      | 1.014E-05 | 3.258495  | up        | PREDICTED: pachytene checkpoint protein 2 homolog [Sesamum indicum]                   |
| c39774.graph_c0 | 0              | 0              | 0.0520425      | 1.4147632      | 1.798524       | 1.4746502      | 3.332E-21 | 6.527031  | up        | PREDICTED: uncharacterized protein LOC105171399 isoform X2 [Sesamum indicum]          |
| c39810.graph_c0 | 0.3088332      | 0.1533661      | 0.1764038      | 0.5676299      | 0.933106       | 0.9230656      | 4.762E-06 | 1.957466  | up        | PREDICTED: protein argonaute MEL1 [Sesamum indicum]                                   |
| c39816.graph_c0 | 6.4130566      | 6.4245742      | 5.6067876      | 16.141914      | 27.55748       | 30.034813      | 8.942E-07 | 2.031435  | up        | PREDICTED: protein IQ-DOMAIN 1 isoform X1 [Sesamum indicum]                           |
| c39829.graph_c0 | 4.1374537      | 3.5361134      | 2.809145       | 0.7606566      | 0.890647       | 0.9261853      | 8.44E-07  | -1.984803 | down      | -                                                                                     |
| c39843.graph_c0 | 1.5239386      | 2.1168826      | 1.6739712      | 5.1264464      | 3.8566894      | 3.900397       | 0.0015504 | 1.325719  | up        | PREDICTED: uncharacterized protein LOC105171798 [Sesamum indicum]                     |
| c39856.graph_c1 | 2.8931896      | 4.7021021      | 3.0353388      | 0.9430279      | 1.221029       | 2.0511348      | 0.0057769 | -1.30071  | down      | -                                                                                     |
| c39870.graph_c0 | 0.4420102      | 0.5321251      | 0.3606768      | 4.8557647      | 3.7591456      | 3.822096       | 2.295E-11 | 3.2678    | up        | -                                                                                     |
| c39870.graph_c1 | 0.2931868      | 0.2117762      | 0.4784761      | 2.3784696      | 1.8897751      | 2.0502121      | 5.629E-09 | 2.728359  | up        | hypothetical protein PFL1_05374 [Pseudozyma flocculosa PF-1]                          |
| c39878.graph_c0 | 38.561055      | 41.936028      | 40.465696      | 2.0753086      | 2.7192441      | 2.3325437      | 2.869E-82 | -4.046867 | down      | PREDICTED: uncharacterized protein LOC105157942 isoform X1 [Sesamum indicum]          |
| c39883.graph_c0 | 2.5339367      | 2.5374971      | 3.0075224      | 6.8910957      | 6.6816124      | 7.6905509      | 2.77E-05  | 1.437317  | up        | PREDICTED: adenine phosphoribosyltransferase 5-like isoform X1 [Sesamum indicum]      |
| c39891.graph_c0 | 13.91853       | 13.959508      | 15.035658      | 6.3654284      | 4.1947131      | 5.0395508      | 1.503E-08 | -1.411077 | down      | -                                                                                     |
| c39893.graph_c0 | 0.1769928      | 0.3652752      | 0.3713778      | 1.5063596      | 1.4599921      | 1.6540486      | 7.3E-08   | 2.379847  | up        | PREDICTED: uncharacterized protein LOC105155471 [Sesamum indicum]                     |
| c39894.graph_c0 | 41.616889      | 31.691342      | 52.79192       | 1.7166906      | 1.4397452      | 1.0501569      | 2.603E-21 | -4.858178 | down      | PREDICTED: beta-amyrin 28-oxidase-like [Sesamum indicum]                              |
| c39913.graph_c0 | 98.431038      | 103.68633      | 99.970466      | 25.730896      | 38.421877      | 36.351965      | 9.909E-27 | -1.552476 | down      | PREDICTED: uncharacterized protein LOC105168623 [Sesamum indicum]                     |
| c39933.graph_c0 | 2.8427797      | 2.9660379      | 2.5516536      | 9.4890394      | 7.5499689      | 9.4764355      | 7.456E-10 | 1.710021  | up        | hypothetical protein L484_002978 [Morus notabilis]                                    |
| c39938.graph_c0 | 0.7029519      | 0.8189673      | 0.6106096      | 6.754683       | 5.6332638      | 6.75197        | 9.91E-25  | 3.210533  | up        | PREDICTED: thioredoxin reductase NTRC [Sesamum indicum]                               |
| c39945.graph_c0 | 23.404464      | 28.209275      | 24.097525      | 63.252031      | 66.118372      | 75.456756      | 9.579E-22 | 1.476213  | up        | PREDICTED: protodermal factor 1-like [Sesamum indicum]                                |
| c39981.graph_c0 | 43.474453      | 45.941186      | 44.97649       | 108.48015      | 120.1188       | 126.89367      | 1.073E-23 | 1.443106  | up        | PREDICTED: 2-aminoethanethiol dioxygenase-like isoform X1 [Sesamum indicum]           |
| c40001.graph_c0 | 12.195964      | 10.681068      | 11.60458       | 24.172199      | 25.636449      | 25.955752      | 2.585E-14 | 1.176457  | up        | PREDICTED: protein IQ-DOMAIN 1-like [Sesamum indicum]                                 |
| c40024.graph_c0 | 7.9903023      | 7.9978858      | 9.0061912      | 3.938782       | 2.6824256      | 3.709525       | 1.226E-07 | -1.228101 | down      | PREDICTED: pheophytinase, chloroplastic [Sesamum indicum]                             |
| c40027.graph_c0 | 30.521977      | 28.283707      | 31.003872      | 9.738613       | 10.738934      | 12.328443      | 4.477E-16 | -1.413982 | down      | hypothetical protein MIMGU_mgv1a025482mg [Erythranthe guttata]                        |
| c40069.graph_c0 | 7.33634        | 6.6968187      | 5.9863935      | 12.773834      | 14.831432      | 18.003872      | 7.468E-05 | 1.225766  | up        | PREDICTED: villin-3-like [Sesamum indicum]                                            |
| c40069.graph_c1 | 6.3340047      | 6.2045889      | 6.0461652      | 10.149637      | 14.684125      | 14.490175      | 0.0001479 | 1.116751  | up        | PREDICTED: villin-3-like [Sesamum indicum]                                            |
| c40069.graph_c2 | 10.301513      | 10.052716      | 10.222957      | 17.990287      | 22.290323      | 25.495543      | 1.366E-10 | 1.142077  | up        | PREDICTED: villin-2-like [Sesamum indicum]                                            |

| #ID             | 28 h-1<br>FPKM | 28 h-2<br>FPKM | 28 h-3<br>FPKM | 48 h-1<br>FPKM | 48 h-2<br>FPKM | 48 h-3<br>FPKM | FDR       | log2FC    | regulated | nr_annotation                                                                                                                 |
|-----------------|----------------|----------------|----------------|----------------|----------------|----------------|-----------|-----------|-----------|-------------------------------------------------------------------------------------------------------------------------------|
| c40070.graph_c0 | 3.3800174      | 3.7284257      | 3.5386515      | 0.9700576      | 1.3273921      | 1.1328862      | 2.487E-07 | -1.596531 | down      | PREDICTED: protein TRM32 isoform X2 [Sesamum indicum]                                                                         |
| c40072.graph_c0 | 3.8194776      | 3.054501       | 3.2502338      | 6.5359833      | 8.0231424      | 11.015942      | 3.114E-05 | 1.372503  | up        | PREDICTED: putative zinc finger protein At1g68190 isoform X1 [Sesamum indicum]                                                |
| c40085.graph_c0 | 2.6985029      | 2.2980579      | 2.3020452      | 5.1696966      | 5.7237344      | 6.813482       | 2.134E-05 | 1.317325  | up        | PREDICTED: uncharacterized protein LOC105112551 [Sesamum indicum]                                                             |
| c40091.graph_c0 | 25.450054      | 27.181193      | 25.285789      | 86.250207      | 73.097309      | 67.575393      | 1.761E-12 | 1.588513  | up        | PREDICTED: universal stress protein A-like protein [Sesamum indicum]                                                          |
| c40092.graph_c0 | 0.0237936      | 0              | 0.0776614      | 0.7841626      | 1.7253524      | 2.2542472      | 1.898E-07 | 5.576799  | up        | PREDICTED: uncharacterized protein LOC105168414 [Sesamum indicum]                                                             |
| c40102.graph_c0 | 19.232515      | 18.456682      | 19.303097      | 9.5076654      | 9.4450109      | 8.1499784      | 1.215E-08 | -1.028888 | down      | PREDICTED: protein Brevis radix-like 2 [Sesamum indicum]                                                                      |
| c40130.graph_c0 | 17.138414      | 15.409994      | 15.963239      | 114.34584      | 91.354398      | 83.218475      | 3.026E-15 | 2.621795  | up        | PREDICTED: bifunctional 3-dehydroquinone dehydratase/shikimate dehydrogenase, chloroplastic-like isoform X1 [Sesamum indicum] |
| c40137.graph_c0 | 130.17107      | 132.12511      | 110.42076      | 34.938096      | 41.492471      | 39.48979       | 1.021E-29 | -1.645413 | down      | PREDICTED: CBL-interacting serine/threonine-protein kinase 7-like isoform X1 [Sesamum indicum]                                |
| c40153.graph_c0 | 7.1317729      | 8.4346052      | 7.4587553      | 24.446325      | 21.176943      | 16.314145      | 4.603E-06 | 1.475097  | up        | Lysine decarboxylase family protein isoform 3 [Theobroma cacao]                                                               |
| c40153.graph_c1 | 27.096448      | 30.549917      | 26.422602      | 61.185756      | 57.198741      | 63.243157      | 3.225E-15 | 1.154158  | up        | PREDICTED: 50S ribosomal protein L15, chloroplastic [Sesamum indicum]                                                         |
| c40169.graph_c0 | 8.1634756      | 8.4524456      | 8.0370388      | 3.5879895      | 3.4078288      | 4.603708       | 4.253E-10 | -1.047222 | down      | PREDICTED: uncharacterized protein LOC105110551 [Sesamum indicum]                                                             |
| c40171.graph_c0 | 3.7273008      | 3.2539659      | 3.5248558      | 9.3241008      | 9.2645379      | 8.9090243      | 1.588E-15 | 1.430568  | up        | PREDICTED: 125 kDa kinesin-related protein-like [Sesamum indicum]                                                             |
| c40184.graph_c0 | 5.5698021      | 4.866783       | 5.864404       | 1.3664776      | 2.1111087      | 3.2423562      | 0.0012502 | -1.247572 | down      | PREDICTED: ADP-ribosylation factor-like protein 8B isoform X1 [Nelumbo nucifera]                                              |
| c40189.graph_c0 | 0.209514       | 0.3625787      | 0.3134298      | 0.7967234      | 1.1488211      | 1.5359926      | 1.599E-05 | 2.008581  | up        | PREDICTED: uncharacterized protein LOC105117814 [Sesamum indicum]                                                             |
| c40192.graph_c0 | 2.6470166      | 4.3816809      | 4.2478897      | 7.9408493      | 9.5379654      | 9.6531668      | 2.679E-05 | 1.305204  | up        | PREDICTED: endo-1,3;1,4-beta-D-glucanase-like [Sesamum indicum]                                                               |
| c40204.graph_c0 | 1.4269451      | 1.7996666      | 1.5340186      | 2.8136236      | 3.9843958      | 4.1640601      | 0.0001914 | 1.238925  | up        | PREDICTED: transcription factor EGL1-like [Sesamum indicum]                                                                   |
| c40207.graph_c0 | 0.2926717      | 0.2789359      | 0.3449589      | 3.4212866      | 2.6200759      | 3.9061637      | 1.102E-20 | 3.483226  | up        | PREDICTED: kinesin-4 [Sesamum indicum]                                                                                        |
| c40208.graph_c0 | 0.4726099      | 0.5943633      | 0.426965       | 5.5841678      | 7.3663537      | 9.4615831      | 7.307E-19 | 3.942621  | up        | PREDICTED: cellulose synthase-like protein D5 [Sesamum indicum]                                                               |
| c40228.graph_c0 | 2.1452499      | 2.1604549      | 3.0297227      | 6.9550362      | 6.0384505      | 5.4905927      | 9.334E-05 | 1.378562  | up        | PREDICTED: membrane protein of ER body-like protein [Sesamum indicum]                                                         |
| c40229.graph_c0 | 2.4702463      | 2.2750088      | 1.8947587      | 3.9453361      | 4.8098631      | 5.3215272      | 0.0002654 | 1.121912  | up        | PREDICTED: transcription factor E2FA-like [Sesamum indicum]                                                                   |
| c40230.graph_c0 | 3.0140526      | 2.27869        | 2.4947453      | 1.1516441      | 1.471779       | 1.089788       | 0.0014985 | -1.028905 | down      | -                                                                                                                             |
| c40238.graph_c0 | 12.378603      | 16.165634      | 13.858072      | 4.044858       | 4.1124848      | 3.864795       | 9.331E-20 | -1.775859 | down      | PREDICTED: glucose-1-phosphate adenyltransferase large subunit 2, chloroplastic/amyloplastic-like [Sesamum indicum]           |
| c40264.graph_c0 | 1.4133117      | 1.6844361      | 1.2455109      | 6.8076113      | 7.8191515      | 7.906464       | 1.696E-10 | 2.41508   | up        | PREDICTED: very-long-chain enoyl-CoA reductase-like [Sesamum indicum]                                                         |
| c40274.graph_c0 | 3.9035243      | 5.0054057      | 3.399378       | 1.1642364      | 2.2905392      | 1.7018858      | 0.0010176 | -1.222368 | down      | -                                                                                                                             |
| c40283.graph_c0 | 7.4242157      | 8.1881564      | 8.2682203      | 14.959092      | 17.698366      | 18.301951      | 2.724E-10 | 1.132124  | up        | unnamed protein product [Coffea canephora]                                                                                    |
| c40304.graph_c0 | 31.997003      | 29.996303      | 31.621928      | 12.703957      | 13.408456      | 13.020423      | 1.303E-12 | -1.217114 | down      | PREDICTED: probable serine/threonine-protein kinase Cx32, chloroplastic [Sesamum indicum]                                     |

| #ID             | 28 h-1<br>FPKM | 28 h-2<br>FPKM | 28 h-3<br>FPKM | 48 h-1<br>FPKM | 48 h-2<br>FPKM | 48 h-3<br>FPKM | FDR       | log2FC    | regulated | nr_annotation                                                                                         |
|-----------------|----------------|----------------|----------------|----------------|----------------|----------------|-----------|-----------|-----------|-------------------------------------------------------------------------------------------------------|
| c40319.graph_c0 | 0.1999893      | 0.2608256      | 0.1813218      | 0.8731707      | 0.7459827      | 0.8270674      | 8.643E-06 | 1.974571  | up        | PREDICTED: monofunctional riboflavin biosynthesis protein RIBA 3, chloroplastic [Sesamum indicum]     |
| c40334.graph_c0 | 7.6496659      | 7.4223737      | 5.9625694      | 2.3879477      | 2.9130351      | 2.1891688      | 0.000115  | -1.448847 | down      | -                                                                                                     |
| c40354.graph_c1 | 4.1502073      | 3.9613766      | 4.5153804      | 18.48758       | 13.906129      | 16.004334      | 5.021E-14 | 1.984844  | up        | PREDICTED: GATA transcription factor 8 [Sesamum indicum]                                              |
| c40357.graph_c0 | 1.3709852      | 1.3168842      | 1.4519463      | 6.6185241      | 3.290324       | 4.1454161      | 0.0039112 | 1.817759  | up        | ribulose-1,5-bisphosphate carboxylase/oxygenase large subunit (chloroplast) [Andrographis paniculata] |
| c40362.graph_c0 | 0.5188646      | 0.6090319      | 0.9314564      | 5.3931323      | 5.9920706      | 6.6129483      | 3.13E-14  | 3.166032  | up        | PREDICTED: uncharacterized protein LOC105160951 [Sesamum indicum]                                     |
| c40362.graph_c1 | 3.1519289      | 3.3692795      | 2.9562623      | 0.7347682      | 0.9729972      | 1.5118947      | 0.000303  | -1.523986 | down      | PREDICTED: protein SH1 RELATED SEQUENCE 5-LIKE [Sesamum indicum]                                      |
| c40376.graph_c1 | 101.06051      | 94.763587      | 114.44201      | 26.821951      | 24.777535      | 18.042704      | 2.903E-37 | -2.10941  | down      | PREDICTED: protein SRG1 [Sesamum indicum]                                                             |
| c40408.graph_c0 | 20.591957      | 19.835839      | 20.716384      | 10.334831      | 9.722767       | 8.393195       | 2.2E-12   | -1.05919  | down      | PREDICTED: nucleolin-like isoform X1 [Sesamum indicum]                                                |
| c40410.graph_c0 | 0.4703383      | 0.1633352      | 0.2952248      | 1.0089343      | 1.4089302      | 1.2650025      | 4.316E-06 | 2.023331  | up        | Uncharacterized protein TCM_021521 [Theobroma cacao]                                                  |
| c40418.graph_c0 | 3.3012639      | 3.461495       | 4.5186396      | 28.752218      | 37.180597      | 44.44091       | 3.551E-23 | 3.325785  | up        | PREDICTED: organ-specific protein SZ-LIKE [Nicotiana tomentosiformis]                                 |
| c40434.graph_c0 | 24.514596      | 20.053371      | 21.713429      | 48.60301       | 45.130245      | 40.647139      | 2.441E-11 | 1.064079  | up        | PREDICTED: putative glutamine amidotransferase YLR126C [Sesamum indicum]                              |
| c40440.graph_c0 | 5.6919207      | 5.4309591      | 5.8496361      | 14.039861      | 15.637865      | 14.817593      | 3.174E-18 | 1.43082   | up        | PREDICTED: armadillo repeat-containing kinesin-like protein 2 isoform X2 [Sesamum indicum]            |
| c40443.graph_c0 | 3.2320187      | 3.0813396      | 3.2270079      | 0.6361524      | 1.4017669      | 1.7207757      | 0.0002019 | -1.316093 | down      | PREDICTED: pentatricopeptide repeat-containing protein At2g21090 [Sesamum indicum]                    |
| c40462.graph_c0 | 1.5061942      | 2.1008216      | 1.7243278      | 3.1202795      | 4.4526919      | 5.1724822      | 1.551E-05 | 1.292194  | up        | PREDICTED: paramyosin-like [Sesamum indicum]                                                          |
| c40484.graph_c0 | 0.0231955      | 0.06283        | 0.1514185      | 3.1460099      | 2.4918251      | 1.9882883      | 3.746E-17 | 5.052224  | up        | PREDICTED: probable receptor-like protein kinase At5g39020 [Sesamum indicum]                          |
| c40493.graph_c0 | 14.965705      | 17.155531      | 19.370589      | 35.561567      | 33.137268      | 36.986765      | 8.166E-10 | 1.079683  | up        | PREDICTED: clp protease-related protein At4g12060, chloroplastic isoform X1 [Sesamum indicum]         |
| c40499.graph_c0 | 214.99057      | 237.90505      | 255.42699      | 61.027328      | 70.647282      | 72.02366       | 1.342E-27 | -1.75895  | down      | PREDICTED: legumin B-like [Sesamum indicum]                                                           |
| c40504.graph_c0 | 8.3208668      | 7.6234473      | 7.6085245      | 2.4196773      | 2.6619453      | 2.8982886      | 1.452E-08 | -1.52187  | down      | PREDICTED: isochorismate synthase, chloroplastic-like [Sesamum indicum]                               |
| c40517.graph_c0 | 42.560167      | 44.550958      | 39.244758      | 96.7312        | 87.611395      | 102.42342      | 9.99E-16  | 1.225282  | up        | hypothetical protein MIMGU_mgv1a015340mg [Erythranthe guttata]                                        |
| c40523.graph_c1 | 47.395834      | 52.310277      | 48.465655      | 22.259377      | 21.164211      | 15.453638      | 1.15E-19  | -1.285613 | down      | PREDICTED: uncharacterized protein LOC105164512 [Sesamum indicum]                                     |
| c40525.graph_c0 | 16.408521      | 16.877567      | 15.915024      | 4.9140515      | 5.4883292      | 6.6773738      | 1.542E-12 | -1.487967 | down      | PREDICTED: U-box domain-containing protein 4 [Sesamum indicum]                                        |
| c40570.graph_c0 | 23.796578      | 23.950333      | 23.246326      | 54.652661      | 62.345214      | 63.778805      | 1.085E-21 | 1.387916  | up        | PREDICTED: transmembrane emp24 domain-containing protein p24delta3-like [Sesamum indicum]             |
| c40591.graph_c0 | 6.9688088      | 4.9255534      | 8.3367561      | 0.079941       | 0.1270317      | 0.142262       | 6.301E-21 | -5.824082 | down      | PREDICTED: cytokinin hydroxylase [Sesamum indicum]                                                    |
| c40597.graph_c0 | 15.119822      | 14.944914      | 15.476323      | 45.592594      | 40.139957      | 31.799048      | 5.727E-07 | 1.414475  | up        | PREDICTED: uncharacterized protein LOC105174543 [Sesamum indicum]                                     |
| c40600.graph_c1 | 136.2735       | 134.07936      | 125.86941      | 41.690272      | 63.193882      | 69.585451      | 1.377E-14 | -1.149365 | down      | PREDICTED: auxin response factor 19-like [Sesamum indicum]                                            |

| #ID             | 28 h-1<br>FPKM | 28 h-2<br>FPKM | 28 h-3<br>FPKM | 48 h-1<br>FPKM | 48 h-2<br>FPKM | 48 h-3<br>FPKM | FDR       | log2FC    | regulated | nr_annotation                                                                                                         |
|-----------------|----------------|----------------|----------------|----------------|----------------|----------------|-----------|-----------|-----------|-----------------------------------------------------------------------------------------------------------------------|
| c40615.graph_c0 | 2.307393       | 2.935643       | 2.7386383      | 13.205873      | 10.046525      | 7.8468144      | 1.262E-05 | 2.01219   | up        | PREDICTED: cytochrome P450 CYP72A219-like [Sesamum indicum]                                                           |
| c40623.graph_c1 | 0.1045614      | 0.0629394      | 0.0568808      | 4.9481315      | 4.6803083      | 2.5158958      | 1.806E-12 | 5.806451  | up        | PREDICTED: E3 ubiquitin-protein ligase RMA1H1-like [Sesamum indicum]                                                  |
| c40632.graph_c1 | 13.689308      | 12.803102      | 17.460841      | 1.2732847      | 1.0038257      | 1.2120049      | 1.035E-29 | -3.610405 | down      | PREDICTED: cytochrome P450 71A1-like [Vitis vinifera]                                                                 |
| c40642.graph_c0 | 0.0280562      | 0.1519927      | 0.2060426      | 0.8179558      | 1.43165        | 1.5822004      | 8.11E-09  | 3.341754  | up        | PREDICTED: uncharacterized protein LOC105165904 [Sesamum indicum]                                                     |
| c40646.graph_c0 | 46.722781      | 45.203823      | 49.782264      | 6.8112404      | 5.6317528      | 6.8736082      | 4.921E-42 | -2.831085 | down      | PREDICTED: transcription factor PIF3 isoform X2 [Sesamum indicum]                                                     |
| c40646.graph_c1 | 30.178975      | 30.180616      | 34.717698      | 4.9028163      | 4.5527123      | 4.6317864      | 4.902E-37 | -2.711481 | down      | unnamed protein product [Vitis vinifera]                                                                              |
| c40673.graph_c0 | 1.620265       | 1.6350589      | 1.9054126      | 9.9065901      | 6.9112302      | 4.8374036      | 0.0008174 | 2.12158   | up        | PREDICTED: GDSL esterase/lipase At4g10955-like [Sesamum indicum]                                                      |
| c40691.graph_c0 | 104.83913      | 105.68437      | 102.07325      | 576.06955      | 378.36048      | 261.1033       | 0.0034582 | 2.013509  | up        | PREDICTED: chaperone protein dnaJ 20, chloroplastic-like [Sesamum indicum]                                            |
| c40692.graph_c0 | 0.1345239      | 0.1214625      | 0.0878163      | 5.3201922      | 4.0103008      | 4.9462925      | 2.994E-33 | 5.422345  | up        | hypothetical protein MIMGU_mgv1a008779mg [Erythranthe guttata]                                                        |
| c40701.graph_c1 | 126.81322      | 140.48111      | 142.9329       | 60.311979      | 59.408283      | 40.161997      | 1.644E-20 | -1.313864 | down      | PREDICTED: glutathione S-transferase F9-like [Sesamum indicum]                                                        |
| c40704.graph_c0 | 0.9562406      | 1.2334223      | 0.9660666      | 2.3087722      | 2.0484112      | 2.0029733      | 0.0077681 | 1.056246  | up        | PREDICTED: protein trichome birefringence-like 3 [Sesamum indicum]                                                    |
| c40715.graph_c0 | 3.9340803      | 3.4515744      | 3.6341631      | 10.914367      | 11.263419      | 10.381299      | 4.196E-09 | 1.605099  | up        | PREDICTED: apoptosis-inducing factor homolog B [Sesamum indicum]                                                      |
| c40715.graph_c2 | 100.62109      | 96.817542      | 92.957897      | 549.08868      | 573.04442      | 509.70748      | 2.246E-63 | 2.532755  | up        | PREDICTED: uncharacterized protein LOC105174179 [Sesamum indicum]                                                     |
| c40731.graph_c0 | 19.546239      | 20.060472      | 19.76772       | 6.8565985      | 8.6451812      | 10.049741      | 8.124E-14 | -1.179854 | down      | PREDICTED: probably inactive leucine-rich repeat receptor-like protein kinase At5g48380 [Sesamum indicum]             |
| c40732.graph_c0 | 0.8481398      | 0.4594744      | 1.6609804      | 8.7081454      | 9.4530074      | 4.4003574      | 2.113E-05 | 2.969952  | up        | hypothetical protein L484_002552 [Morus notabilis]                                                                    |
| c40759.graph_c0 | 79.045828      | 70.038821      | 79.786845      | 33.549929      | 23.114361      | 17.296311      | 2.884E-16 | -1.577405 | down      | hypothetical protein MIMGU_mgv1a008881mg [Erythranthe guttata]                                                        |
| c40770.graph_c0 | 15.586506      | 18.676522      | 16.918328      | 6.8934237      | 7.9547774      | 6.5718503      | 9.38E-07  | -1.215625 | down      | PREDICTED: O-glucosyltransferase rumi homolog isoform X1 [Sesamum indicum]                                            |
| c40770.graph_c1 | 13.137674      | 15.276398      | 13.583205      | 4.9909493      | 7.2242393      | 5.0564892      | 4.136E-07 | -1.243978 | down      | PREDICTED: O-glucosyltransferase rumi homolog isoform X1 [Sesamum indicum]                                            |
| c40773.graph_c0 | 1472.244       | 1358.7118      | 1292.612       | 335.70093      | 366.24336      | 241.12372      | 1.44E-24  | -2.084707 | down      | hypothetical protein MIMGU_mgv1a016776mg [Erythranthe guttata]                                                        |
| c40776.graph_c0 | 5.0211583      | 4.6676343      | 5.44951        | 0.9092411      | 0.6310822      | 0.697446       | 7.701E-15 | -2.7096   | down      | -                                                                                                                     |
| c40800.graph_c0 | 0.9340715      | 1.4272568      | 0.9380858      | 1.9126225      | 2.9910448      | 3.9709601      | 0.0020013 | 1.460227  | up        | PREDICTED: LOW QUALITY PROTEIN: probable leucine-rich repeat receptor-like protein kinase At1g35710 [Sesamum indicum] |
| c40802.graph_c0 | 0.7532819      | 0.9824286      | 0.785414       | 1.8566338      | 2.135468       | 2.3128303      | 0.0016125 | 1.36157   | up        | hypothetical protein MIMGU_mgv1a011194mg [Erythranthe guttata]                                                        |
| c40806.graph_c1 | 35.187821      | 40.381924      | 35.983521      | 71.801815      | 99.621028      | 112.11458      | 4.431E-08 | 1.381158  | up        | PREDICTED: phenylalanine ammonia-lyase [Sesamum indicum]                                                              |
| c40828.graph_c0 | 1.4755066      | 2.3138977      | 2.0594759      | 3.7898453      | 3.6498923      | 4.9049914      | 0.0031515 | 1.118012  | up        | PREDICTED: protein ABIL4-like [Sesamum indicum]                                                                       |
| c40830.graph_c0 | 1.946102       | 2.2554432      | 1.951427       | 4.4918353      | 4.1344821      | 4.0732497      | 7.592E-07 | 1.089595  | up        | PREDICTED: auxilin-like protein 1 [Sesamum indicum]                                                                   |
| c40897.graph_c0 | 2.5650368      | 1.8426472      | 2.4138814      | 0.9730386      | 0.9553909      | 0.9502726      | 0.0012932 | -1.202526 | down      | PREDICTED: protein root UVB sensitive 6 [Sesamum indicum]                                                             |

| #ID             | 28 h-1<br>FPKM | 28 h-2<br>FPKM | 28 h-3<br>FPKM | 48 h-1<br>FPKM | 48 h-2<br>FPKM | 48 h-3<br>FPKM | FDR       | log2FC    | regulated | nr_annotation                                                                                          |
|-----------------|----------------|----------------|----------------|----------------|----------------|----------------|-----------|-----------|-----------|--------------------------------------------------------------------------------------------------------|
| c40910.graph_c0 | 234.1593       | 207.00049      | 211.36502      | 27.944737      | 56.643552      | 49.776946      | 9.207E-52 | -2.249135 | down      | PREDICTED: hippocampus abundant transcript-like protein 1 isoform X1 [Sesamum indicum]                 |
| c40910.graph_c1 | 222.93651      | 207.29531      | 203.2866       | 31.384307      | 54.634582      | 49.773671      | 1.422E-48 | -2.189053 | down      | PREDICTED: hippocampus abundant transcript-like protein 1 isoform X1 [Sesamum indicum]                 |
| c40912.graph_c1 | 15.558301      | 17.902041      | 15.804535      | 40.873607      | 31.599038      | 26.421308      | 0.0020013 | 1.054568  | up        | hypothetical protein MIMGU_mgv1a013233mg [Erythranthe guttata]                                         |
| c40916.graph_c0 | 0.3015454      | 0.4084008      | 0.3998452      | 1.6244817      | 2.024637       | 2.4657746      | 1.95E-08  | 2.498423  | up        | PREDICTED: uncharacterized protein LOC105162052 [Sesamum indicum]                                      |
| c40925.graph_c0 | 3.6911696      | 4.1796341      | 4.6660758      | 0.9587765      | 1.3407338      | 0.8531136      | 1.237E-07 | -1.952806 | down      | PREDICTED: uncharacterized protein LOC105166274 [Sesamum indicum]                                      |
| c40929.graph_c0 | 3669.9995      | 3972.1388      | 4094.3939      | 503.03885      | 459.38986      | 381.23699      | 2.553E-37 | -3.081252 | down      | --                                                                                                     |
| c40932.graph_c0 | 4.4527786      | 3.994915       | 4.4177907      | 8.8157416      | 10.079512      | 11.893839      | 2.458E-13 | 1.296932  | up        | PREDICTED: uncharacterized protein LOC105165461 [Sesamum indicum]                                      |
| c40939.graph_c0 | 3.8973078      | 3.4035296      | 3.2583722      | 9.2323641      | 8.3220642      | 7.9266599      | 2.255E-06 | 1.315674  | up        | PREDICTED: uncharacterized protein LOC105156651 [Sesamum indicum]                                      |
| c40942.graph_c0 | 3.0529279      | 2.7893232      | 3.143612       | 4.3765719      | 9.1264803      | 11.108853      | 0.0085792 | 1.481981  | up        | PREDICTED: serine carboxypeptidase-like 27 [Sesamum indicum]                                           |
| c40949.graph_c0 | 59.684948      | 78.35717       | 82.197013      | 39.276864      | 30.861344      | 30.434697      | 2.579E-06 | -1.083747 | down      | PREDICTED: malate synthase [Tarenaya hassleriana]                                                      |
| c40952.graph_c0 | 34.772865      | 38.934204      | 37.170966      | 81.655244      | 100.97998      | 117.58466      | 5.425E-13 | 1.473996  | up        | putative nitrilase-associated protein [Plantago major]                                                 |
| c40960.graph_c0 | 4.208119       | 5.6088402      | 3.9897378      | 0.6096115      | 0.3229047      | 0.0904048      | 2.578E-16 | -3.689555 | down      | PREDICTED: transcription factor bHLH113-like [Sesamum indicum]                                         |
| c40962.graph_c0 | 1.3451533      | 1.8555584      | 1.7684105      | 2.6049847      | 3.1108956      | 4.2986504      | 0.007391  | 1.047144  | up        | PREDICTED: ATP-dependent DNA helicase Q-like 1 isoform X2 [Sesamum indicum]                            |
| c40970.graph_c0 | 0.8100189      | 1.5313083      | 1.3219376      | 9.9467241      | 13.528595      | 15.988064      | 9.603E-21 | 3.464662  | up        | PREDICTED: glycerophosphodiester phosphodiesterase GDPDL3-like [Sesamum indicum]                       |
| c40977.graph_c0 | 10.914781      | 8.5563001      | 8.6992475      | 4.2900122      | 3.7494169      | 4.7715338      | 0.0049658 | -1.094216 | down      | class 1 KNOX homeobox transcription factor SIM-like 2 [Prunus nersical]                                |
| c40980.graph_c0 | 17.131174      | 16.654266      | 16.443994      | 6.6623875      | 8.5586395      | 7.3547872      | 2.057E-13 | -1.115191 | down      | PREDICTED: putative pentatricopeptide repeat-containing protein At5g65820 isoform X2 [Sesamum indicum] |
| c40985.graph_c0 | 11.558468      | 11.384959      | 10.460519      | 2.0169197      | 4.878085       | 4.0294815      | 4.378E-10 | -1.583747 | down      | PREDICTED: zinc transporter 4, chloroplastic-like [Sesamum indicum]                                    |
| c41001.graph_c0 | 261.38354      | 296.77137      | 258.96303      | 80.658165      | 124.45472      | 134.68887      | 6.97E-12  | -1.231934 | down      | PREDICTED: uncharacterized protein LOC105155456 [Sesamum indicum]                                      |
| c41003.graph_c0 | 118.90689      | 127.93342      | 144.2844       | 19.669734      | 16.5792        | 13.334866      | 1.535E-64 | -2.932389 | down      | hypothetical protein M569_01497, partial [Genlisea aurea]                                              |
| c41009.graph_c0 | 5.6535234      | 4.5374236      | 4.378296       | 9.621364       | 10.860464      | 13.107235      | 1.408E-08 | 1.243367  | up        | PREDICTED: uncharacterized protein LOC105156446 [Sesamum indicum]                                      |
| c41020.graph_c0 | 69.085799      | 65.033624      | 64.997597      | 595.19832      | 613.76568      | 766.20865      | 6.63E-54  | 3.349881  | up        | PREDICTED: stachyose synthase [Sesamum indicum]                                                        |
| c41025.graph_c0 | 5.8813502      | 5.3210792      | 5.4805523      | 11.522807      | 13.12014       | 11.961745      | 1.904E-13 | 1.173988  | up        | PREDICTED: uncharacterized protein LOC105177410 [Sesamum indicum]                                      |
| c41038.graph_c0 | 5.8560389      | 5.8067576      | 6.3144199      | 14.647092      | 16.640207      | 12.67906       | 1.478E-06 | 1.331874  | up        | shikimate kinase, partial [Ipomoea purpurea]                                                           |
| c41040.graph_c0 | 5.1891421      | 4.9765577      | 4.4517345      | 14.701869      | 16.271667      | 16.751453      | 4.322E-28 | 1.747175  | up        | PREDICTED: glucomannan 4-beta-mannosyltransferase 9-like [Nicotiana tomentosiformis]                   |
| c41055.graph_c0 | 1.1931526      | 2.616312       | 1.6690333      | 6.2656936      | 8.6977317      | 6.7286613      | 6.177E-06 | 2.023953  | up        | calmodulin, partial [Malus domestica]                                                                  |



| #ID             | 28 h-1<br>FPKM | 28 h-2<br>FPKM | 28 h-3<br>FPKM | 48 h-1<br>FPKM | 48 h-2<br>FPKM | 48 h-3<br>FPKM | FDR       | log2FC    | regulated | nr_annotation                                                                                     |
|-----------------|----------------|----------------|----------------|----------------|----------------|----------------|-----------|-----------|-----------|---------------------------------------------------------------------------------------------------|
| c41061.graph_c0 | 18.275551      | 17.787416      | 16.885404      | 6.6760727      | 7.5362593      | 7.0439971      | 2.55E-16  | -1.276261 | down      | PREDICTED: pentatricopeptide repeat-containing protein At2g17670 [Sesamum indicum]                |
| c41070.graph_c1 | 21.030291      | 21.811559      | 24.011813      | 9.0534711      | 9.5697414      | 9.6131641      | 1.666E-15 | -1.202609 | down      | probable tocopherol cyclase, chloroplastic [Sesamum indicum]                                      |
| c41081.graph_c0 | 0.0457311      | 0              | 0.1119487      | 0.7535788      | 0.7369157      | 1.2636909      | 1.073E-09 | 4.160533  | up        | PREDICTED: probable LRR receptor-like serine/threonine-protein kinase At4g31250 [Sesamum indicum] |
| c41083.graph_c0 | 3.246595       | 2.1741         | 2.2518157      | 15.500957      | 14.459537      | 20.658472      | 4.373E-19 | 2.762094  | up        | hypothetical protein MIMGU_mgv1a013647mg [Erythranthe guttata]                                    |
| c41101.graph_c0 | 505.5497       | 537.54127      | 474.07211      | 65.197951      | 80.310472      | 86.532433      | 4.711E-63 | -2.671139 | down      | -                                                                                                 |
| c41104.graph_c0 | 5.6599779      | 4.8938858      | 6.2623671      | 16.446489      | 16.263671      | 13.308543      | 1.229E-14 | 1.496003  | up        | PREDICTED: UPF0496 protein At4g34320 [Sesamum indicum]                                            |
| c41107.graph_c0 | 110.41254      | 122.96525      | 131.17472      | 15.395859      | 14.206714      | 12.397414      | 2.497E-92 | -3.072861 | down      | PREDICTED: isopentenyl-diphosphate Delta-isomerase 1 [Sesamum indicum]                            |
| c41123.graph_c1 | 23.113285      | 22.283159      | 20.446628      | 8.214334       | 6.4540507      | 7.4917916      | 2.341E-10 | -1.525279 | down      | hypothetical protein MIMGU_mgv1a010537mg [Erythranthe guttata]                                    |
| c41126.graph_c0 | 57.002776      | 55.857301      | 56.973311      | 118.21077      | 121.98436      | 127.75751      | 2.275E-15 | 1.156495  | up        | hypothetical protein MIMGU_mgv1a006861mg [Erythranthe guttata]                                    |
| c41134.graph_c0 | 3.8873565      | 4.9749279      | 4.1374581      | 7.6697776      | 10.031671      | 12.162137      | 3.375E-06 | 1.235795  | up        | PREDICTED: dynamin-like protein ARC5 [Sesamum indicum]                                            |
| c41135.graph_c0 | 5.0178979      | 4.6976116      | 4.8272752      | 11.013804      | 10.852108      | 9.5319306      | 7.026E-07 | 1.15386   | up        | hypothetical protein MIMGU_mgv1a008665mg [Erythranthe guttata]                                    |
| c41136.graph_c1 | 24.907351      | 27.80617       | 33.243451      | 5.4455412      | 6.7411755      | 8.2753067      | 5.293E-18 | -2.034573 | down      | PREDICTED: protein TRANSPARENT TESTA 12-like [Nicotiana tomentosiformis]                          |
| c41136.graph_c2 | 12.234048      | 14.713881      | 14.623364      | 2.9682432      | 3.2728405      | 4.0425383      | 8.267E-12 | -1.976809 | down      | PREDICTED: protein TRANSPARENT TESTA 12-like [Sesamum indicum]                                    |
| c41141.graph_c0 | 0.5149132      | 0.4349236      | 0.2710742      | 2.0212348      | 1.672854       | 2.1544322      | 1.86E-09  | 2.304372  | up        | PREDICTED: LOW QUALITY PROTEIN: uncharacterized protein LOC105157816 [Sesamum indicum]            |
| c41142.graph_c0 | 0              | 0.0953319      | 0.0861552      | 1.4052641      | 3.969885       | 3.4534733      | 1.48E-07  | 5.630661  | up        | gibberelin 20-oxidase [Lactuca sativa]                                                            |
| c41146.graph_c2 | 1.6798507      | 0.9479673      | 0.9423868      | 2.927835       | 2.6787289      | 3.5525045      | 0.0010784 | 1.400561  | up        | PREDICTED: protein BRASSINAZOLE-RESISTANT 1 isoform X2 [Sesamum indicum]                          |
| c41147.graph_c0 | 0.0906254      | 0              | 0.1478991      | 7.4093944      | 10.283263      | 10.01702       | 4.933E-43 | 6.893277  | up        | hypothetical protein MIMGU_mgv1a010461mg [Erythranthe guttata]                                    |
| c41154.graph_c1 | 0.1653251      | 0              | 0.1349039      | 2.724303       | 3.7740898      | 4.0090362      | 2.45E-18  | 5.16271   | up        | -                                                                                                 |
| c41154.graph_c2 | 2.0540376      | 1.5692798      | 3.4810849      | 13.819341      | 19.307715      | 24.236316      | 1.093E-11 | 3.046199  | up        | Ubiquitin-conjugating enzyme [Plantago major]                                                     |
| c41157.graph_c1 | 17.151513      | 17.342742      | 15.305014      | 29.24202       | 34.951687      | 40.330029      | 3.904E-10 | 1.107406  | up        | PREDICTED: 4-hydroxy-3-methylbut-2-en-1-yl diphosphate synthase, chloroplastic [Sesamum indicum]  |
| c41173.graph_c0 | 13.364468      | 13.863332      | 13.672464      | 8.6922893      | 6.3349941      | 4.3047003      | 3.138E-06 | -1.029041 | down      | hypothetical protein MIMGU_mgv1a018356mg [Erythranthe guttata]                                    |
| c41183.graph_c0 | 0              | 0.2039554      | 0.9830535      | 2.4815208      | 4.8532991      | 2.7175905      | 5.467E-05 | 3.112316  | up        | hypothetical protein VOLCADRAFT1_105423 [Volvox carter] f. nagariensis]                           |
| c41191.graph_c0 | 13.885076      | 13.871651      | 13.053319      | 38.412944      | 31.548373      | 30.487733      | 8.726E-10 | 1.346033  | up        | PREDICTED: uncharacterized protein DDB_G028/625 [Sesamum indicum]                                 |
| c41207.graph_c0 | 15.024631      | 12.747576      | 12.143214      | 2.8113791      | 4.3233609      | 3.577483       | 3.934E-18 | -1.862027 | down      | PREDICTED: pentatricopeptide repeat-containing protein At1g1900 [Sesamum indicum]                 |
| c41210.graph_c0 | 25.744393      | 23.320243      | 25.190469      | 125.2341       | 111.04501      | 98.454086      | 1.984E-21 | 2.217958  | up        | PREDICTED: probable beta-1,5-galactosyltransferase 6 [Sesamum indicum]                            |

| #ID             | 28 h-1<br>FPKM | 28 h-2<br>FPKM | 28 h-3<br>FPKM | 48 h-1<br>FPKM | 48 h-2<br>FPKM | 48 h-3<br>FPKM | FDR       | log2FC    | regulated | nr_annotation                                                                                     |
|-----------------|----------------|----------------|----------------|----------------|----------------|----------------|-----------|-----------|-----------|---------------------------------------------------------------------------------------------------|
| c41219.graph_c0 | 29.320652      | 34.645934      | 24.89835       | 66.431803      | 66.009752      | 62.961672      | 1.832E-14 | 1.179987  | up        | hypothetical protein MIMGU_mgv1a008823mg [Erythranthe guttata]                                    |
| c41225.graph_c0 | 81.752595      | 77.040012      | 79.855048      | 26.750016      | 27.212693      | 23.802003      | 2.079E-27 | -1.574823 | down      | PREDICTED: 1-aminocyclopropane-1-carboxylate oxidase homolog 1-like [Solanum lycopersicum]        |
| c41226.graph_c0 | 0.3039429      | 0.2582889      | 0.3647278      | 2.0170016      | 2.1847859      | 3.6095971      | 3.754E-08 | 3.110554  | up        | PREDICTED: alpha-mannosidase-like [Sesamum indicum]                                               |
| c41242.graph_c0 | 11.079988      | 10.510732      | 10.122052      | 3.1803051      | 4.9595527      | 6.0990451      | 3.51E-09  | -1.122529 | down      | PREDICTED: pentatricopeptide repeat-containing protein At3g02490, mitochondrial [Sesamum indicum] |
| c41258.graph_c0 | 1.9502384      | 2.4026994      | 2.6473402      | 23.080362      | 24.769025      | 24.463217      | 5.505E-87 | 3.409424  | up        | PREDICTED: phosphoenolpyruvate carboxykinase [ATP]-like [Sesamum indicum]                         |
| c41261.graph_c1 | 0.0793039      | 0.1432079      | 0.097067       | 2.1109936      | 2.9817891      | 2.5939112      | 2.812E-18 | 4.625513  | up        | hypothetical protein MIMGU_mgv1a019580mg [Erythranthe guttata]                                    |
| c41287.graph_c1 | 0.1617404      | 0.1251741      | 0.1131247      | 1.2301071      | 0.7446568      | 1.0684814      | 2.467E-09 | 2.976415  | up        | hypothetical protein MIMGU_mgv1a018989mg [Erythranthe guttata]                                    |
| c41288.graph_c0 | 8.5182831      | 7.8336408      | 6.6505041      | 3.1326229      | 4.3777726      | 3.4397566      | 0.0033454 | -1.032946 | down      | PREDICTED: transcription initiation factor TFIID subunit 14b [Sesamum indicum]                    |
| c41289.graph_c0 | 88.077064      | 77.784834      | 75.201129      | 240.89555      | 225.88822      | 253.0668       | 9.093E-27 | 1.620758  | up        | PREDICTED: uncharacterized protein LOC105166112 [Sesamum indicum]                                 |
| c41295.graph_c0 | 7.4954551      | 6.9536188      | 5.3096943      | 2.4013621      | 2.4886487      | 2.8334733      | 0.0001692 | -1.314415 | down      | PREDICTED: NAC transcription factor 29 [Sesamum indicum]                                          |
| c41298.graph_c0 | 30.799652      | 36.423663      | 30.586452      | 15.029224      | 12.215902      | 11.793189      | 8.468E-17 | -1.278112 | down      | unnamed protein product [Coffea canephora]                                                        |
| c41313.graph_c0 | 8.2950544      | 8.2453392      | 6.0098741      | 0.7544102      | 0.7492558      | 0.6502925      | 1.015E-26 | -3.344095 | down      | PREDICTED: uncharacterized protein LOC105168700 [Sesamum indicum]                                 |
| c41315.graph_c0 | 2.3066116      | 2.9969899      | 2.2953369      | 0.7487781      | 1.0576528      | 1.1104304      | 0.0010265 | -1.34556  | down      | -                                                                                                 |
| c41321.graph_c0 | 6.4838391      | 5.503742       | 5.8768619      | 28.273462      | 26.380969      | 23.997113      | 4.839E-37 | 2.182649  | up        | PREDICTED: probable amino acid permease 7 [Sesamum indicum]                                       |
| c41322.graph_c0 | 0.4619862      | 0.3932942      | 0.3877477      | 0.1003888      | 0.1595247      | 0.0744378      | 4.995E-05 | -1.856134 | down      | -                                                                                                 |
| c41328.graph_c0 | 0.2611097      | 0.3143434      | 0.319595       | 1.2687402      | 1.2856383      | 1.1289174      | 3.56E-06  | 2.08388   | up        | PREDICTED: uncharacterized protein LOC105177511 [Sesamum indicum]                                 |
| c41351.graph_c0 | 0.1812197      | 0.1227183      | 0.1478738      | 4.0199136      | 5.4753571      | 6.234017       | 3.273E-25 | 5.156738  | up        | -                                                                                                 |
| c41354.graph_c0 | 10.944043      | 10.656576      | 11.395427      | 4.7847253      | 5.6760406      | 5.055686       | 1.055E-12 | -1.048837 | down      | PREDICTED: uncharacterized protein LOC105169395 [Sesamum indicum]                                 |
| c41362.graph_c0 | 22.569382      | 22.193084      | 22.119601      | 77.524393      | 53.006719      | 40.124254      | 0.0086561 | 1.403982  | up        | PREDICTED: gibberellin receptor GID1B-like [Sesamum indicum]                                      |
| c41387.graph_c0 | 2.2254024      | 2.4772558      | 2.3880463      | 0.4637033      | 1.2280934      | 1.1002676      | 0.0018437 | -1.317529 | down      | PREDICTED: pentatricopeptide repeat-containing protein At5g27110 [Sesamum indicum]                |
| c41394.graph_c1 | 2.4212661      | 2.2337019      | 2.0186841      | 6.1382663      | 6.1493386      | 6.2335675      | 4.652E-05 | 1.514793  | up        | PREDICTED: squamosa promoter-binding-like protein 6, partial [Sesamum indicum]                    |
| c41429.graph_c0 | 1.8411318      | 1.6623694      | 1.6756965      | 15.618308      | 11.886281      | 13.817209      | 6.633E-18 | 3.042383  | up        | hypothetical protein PHAVU_003G130600g [Phaseolus vulgaris]                                       |
| c41431.graph_c0 | 28.674871      | 27.39315       | 28.387606      | 12.998772      | 13.770623      | 13.923122      | 1.546E-08 | -1.012566 | down      | PREDICTED: uncharacterized protein LOC105163802 [Sesamum indicum]                                 |
| c41432.graph_c1 | 4.1411616      | 3.3620305      | 4.1742491      | 0.8822231      | 1.2149909      | 1.4129942      | 1.657E-05 | -1.699389 | down      | -                                                                                                 |
| c41445.graph_c0 | 0.107276       | 0.1162322      | 0.0700291      | 2.1756844      | 1.6998444      | 2.1053031      | 1.08E-19  | 4.394633  | up        | unnamed protein product [Coffea canephora]                                                        |
| c41452.graph_c0 | 1.1916486      | 1.4440341      | 0.9211979      | 0.3577506      | 0.3789933      | 0.6366486      | 0.0044108 | -1.335783 | down      | PREDICTED: uncharacterized protein LOC105161758 [Sesamum indicum]                                 |

| #ID             | 28 h-1<br>FPKM | 28 h-2<br>FPKM | 28 h-3<br>FPKM | 48 h-1<br>FPKM | 48 h-2<br>FPKM | 48 h-3<br>FPKM | FDR       | log2FC    | regulated | nr_annotation                                                                   |
|-----------------|----------------|----------------|----------------|----------------|----------------|----------------|-----------|-----------|-----------|---------------------------------------------------------------------------------|
| c41454.graph_c0 | 8.9605614      | 10.089755      | 11.009963      | 78.805538      | 92.404836      | 105.98097      | 6.016E-55 | 3.242737  | up        | PREDICTED: BURP domain-containing protein 3-like [Sesamum indicum]              |
| c41473.graph_c0 | 15.207933      | 13.941941      | 14.998044      | 39.894687      | 42.764732      | 41.513779      | 1.947E-26 | 1.532856  | up        | PREDICTED: probable polygalacturonase [Sesamum indicum]                         |
| c41480.graph_c0 | 1621.4001      | 2138.5385      | 1834.7846      | 335.10848      | 446.22771      | 339.96932      | 6.221E-27 | -2.279924 | down      | PREDICTED: pathogenesis-related protein 51H-2-like [Sesamum indicum]            |
| c41483.graph_c0 | 1.7212561      | 2.9446728      | 1.848067       | 4.1913888      | 4.1969659      | 4.7001572      | 0.0070026 | 1.048607  | up        | PREDICTED: uncharacterized protein LOC105112702 isoform X1 [Populus euphratica] |
| c41484.graph_c0 | 0.7963108      | 1.0545245      | 1.1696096      | 1.7495965      | 2.5663644      | 3.5925703      | 0.0024304 | 1.421043  | up        | hypothetical protein MIMGU_mgv1a017010mg [Erythranthe guttata]                  |
| c41486.graph_c0 | 58.428829      | 55.068439      | 61.399918      | 9.5539206      | 10.12122       | 9.116694       | 2.309E-66 | -2.561078 | down      | glucose and ribitol dehydrogenase homolog 1-like precursor [Sesamum indicum]    |
| c41489.graph_c0 | 124.68696      | 129.56924      | 133.01179      | 51.713788      | 57.711667      | 62.086089      | 2.152E-14 | -1.135673 | down      | PREDICTED: protein DJ-1 homolog D [Sesamum indicum]                             |
| c41508.graph_c0 | 4.5079213      | 4.4312991      | 4.8056868      | 1.6589387      | 2.0503518      | 2.0091547      | 2.113E-05 | -1.227076 | down      | hypothetical protein MIMGU_mgv1a001446mg [Erythranthe guttata]                  |
| c41513.graph_c0 | 0.7386018      | 0.9447582      | 1.4565081      | 3.2768125      | 2.1489529      | 3.6793206      | 0.0003026 | 1.58023   | up        | hypothetical protein MIMGU_mgv1a001330mg [Erythranthe guttata]                  |
| c41529.graph_c0 | 53.303505      | 61.293293      | 58.857111      | 16.985111      | 15.316922      | 17.153331      | 3.44E-31  | -1.767119 | down      | PREDICTED: LOB domain-containing protein 36 [Sesamum indicum]                   |
| c41543.graph_c0 | 14.465702      | 13.998898      | 18.159838      | 7.6166346      | 3.28733        | 4.7691659      | 1.097E-06 | -1.517247 | down      | hypothetical protein MIMGU_mgv1a008932mg [Erythranthe guttata]                  |
| c41543.graph_c1 | 12.37382       | 10.354907      | 11.88237       | 4.3037365      | 3.2421596      | 2.6380579      | 1.173E-06 | -1.715304 | down      | PREDICTED: gibberellin 2-beta-dioxygenase 8 [Sesamum indicum]                   |
| c41549.graph_c0 | 0.7028568      | 1.413458       | 1.1470508      | 4.3736209      | 4.8049254      | 5.0807281      | 2.358E-09 | 2.167654  | up        | PREDICTED: interteron-activable protein 205 isoform X1 [Sesamum indicum]        |
| c41555.graph_c0 | 0.3522654      | 0.4505888      | 0.2155843      | 2.418663       | 3.0747361      | 4.8008647      | 5.89E-08  | 3.372562  | up        | PREDICTED: protein IQ-DOMAIN 1-like [Sesamum indicum]                           |
| c41558.graph_c0 | 1.5153513      | 1.6513002      | 1.5349832      | 0.4305285      | 0.5613449      | 0.8545668      | 0.0032759 | -1.314497 | down      | PREDICTED: NAC domain-containing protein 8-like [Sesamum indicum]               |
| c41561.graph_c0 | 7.5760629      | 10.585539      | 9.048522       | 25.644347      | 21.710927      | 25.014078      | 3.169E-13 | 1.455666  | up        | PREDICTED: probable transcription factor GLK1 [Sesamum indicum]                 |
| c41565.graph_c0 | 6.9740144      | 5.9513206      | 6.2112332      | 2.317825       | 2.112833       | 3.0216364      | 0.0002228 | -1.320014 | down      | PREDICTED: uncharacterized protein LOC105165462 [Sesamum indicum]               |
| c41567.graph_c0 | 31.402432      | 31.753774      | 30.139081      | 61.102719      | 61.307651      | 72.600687      | 1.14E-14  | 1.104346  | up        | chloroplast omega-3 desaturase [Portulaca oleracea]                             |
| c41569.graph_c0 | 1.672773       | 1.8707833      | 2.1870527      | 0.722851       | 0.5105153      | 0.8575846      | 0.0004    | -1.410967 | down      | PREDICTED: uncharacterized protein LOC105179857 isoform X2 [Sesamum indicum]    |
| c41581.graph_c0 | 3.1425287      | 3.2243281      | 2.7640916      | 9.7256711      | 11.399251      | 14.03948       | 5.526E-17 | 1.982903  | up        | PREDICTED: trehalose-phosphate phosphatase A-like isoform X2 [Sesamum indicum]  |
| c41597.graph_c0 | 29.787001      | 30.916187      | 32.091189      | 13.233154      | 13.497671      | 13.410807      | 5.411E-15 | -1.167201 | down      | PREDICTED: ninja-family protein AFP1-like [Sesamum indicum]                     |
| c41598.graph_c0 | 24.496894      | 24.040561      | 22.753999      | 65.181792      | 46.504546      | 43.355047      | 0.000988  | 1.170739  | up        | hypothetical protein MIMGU_mgv1a006127mg [Erythranthe guttata]                  |
| c41613.graph_c0 | 0.7907493      | 0.5949771      | 0.9678675      | 2.8399435      | 1.5485316      | 3.0843833      | 0.0009573 | 1.713061  | up        | -                                                                               |
| c41640.graph_c0 | 447.99514      | 605.11963      | 547.61033      | 79.524951      | 77.389352      | 71.110724      | 6.412E-31 | -2.767902 | down      | PREDICTED: ubiquitin carboxyl-terminal hydrolase isozyme L3 [Sesamum indicum]   |
| c41645.graph_c0 | 5.4457935      | 5.9522075      | 5.2233236      | 2.1496011      | 2.4696847      | 2.5592493      | 8.833E-05 | -1.171887 | down      | PREDICTED: MATE efflux family protein 5-like isoform X3 [Sesamum indicum]       |
| c41664.graph_c0 | 23.367543      | 21.430489      | 27.122782      | 8.7229977      | 12.403519      | 10.983141      | 9.569E-11 | -1.127321 | down      | PREDICTED: probable inactive purple acid phosphatase 27 [Sesamum indicum]       |

| #ID             | 28 h-1<br>FPKM | 28 h-2<br>FPKM | 28 h-3<br>FPKM | 48 h-1<br>FPKM | 48 h-2<br>FPKM | 48 h-3<br>FPKM | FDR       | log2FC    | regulated | nr_annotation                                                                             |
|-----------------|----------------|----------------|----------------|----------------|----------------|----------------|-----------|-----------|-----------|-------------------------------------------------------------------------------------------|
| c41664.graph_c1 | 0.8183132      | 1.0159327      | 1.1128949      | 2.3338627      | 2.4266585      | 3.3841817      | 0.0002074 | 1.504766  | up        | PREDICTED: uncharacterized protein At5g59865-like [Sesamum indicum]                       |
| c41681.graph_c0 | 5.449369       | 5.1998301      | 5.3309158      | 2.295951       | 2.5985916      | 2.8810459      | 6.953E-05 | -1.000402 | down      | PREDICTED: uncharacterized protein LOC105169002 isoform X1 [Sesamum indicum]              |
| c41721.graph_c1 | 0.1319578      | 0.1787183      | 0.215353       | 2.4253605      | 4.695755       | 6.2509649      | 1.489E-07 | 4.696545  | up        | PREDICTED: geraniol synthase, chloroplastic-like [Sesamum indicum]                        |
| c41730.graph_c0 | 1.6677881      | 2.0078084      | 2.3150968      | 6.9739162      | 11.403806      | 11.480976      | 1.588E-10 | 2.35032   | up        | PREDICTED: vacuolar amino acid transporter 1-like isoform X1 [Sesamum indicum]            |
| c41730.graph_c1 | 18.300409      | 18.318752      | 19.241917      | 3.2519321      | 4.6507875      | 4.8225827      | 1.216E-30 | -2.098972 | down      | PREDICTED: glucan endo-1,3-beta-glucosidase 5 [Sesamum indicum]                           |
| c41743.graph_c0 | 19.259886      | 19.334643      | 20.477688      | 4.6350395      | 5.2129497      | 3.9264932      | 3.718E-28 | -2.058508 | down      | 1-O-acylgucose:anthocyanin-O-acyltransferase-like protein [Gentiana triflora]             |
| c41744.graph_c0 | 6.5187258      | 4.6846149      | 7.1284879      | 2.3046365      | 1.310064       | 1.3004133      | 4.954E-07 | -1.845564 | down      | hypothetical protein MIMGU_mgv1a021012mg [Erythranthe guttata]                            |
| c41758.graph_c0 | 0.5263829      | 0.2970465      | 0.4295242      | 1.2232534      | 3.5931457      | 6.0111766      | 0.0097957 | 3.13408   | up        | PREDICTED: tetratricopeptide repeat protein Z8-like [Sesamum indicum]                     |
| c41762.graph_c1 | 32.412414      | 34.629583      | 30.746358      | 90.011509      | 115.21052      | 141.91857      | 6.883E-11 | 1.863812  | up        | PREDICTED: lanC-like protein GCR2 [Sesamum indicum]                                       |
| c41774.graph_c0 | 21.395456      | 20.749877      | 26.914385      | 5.2879979      | 2.1294124      | 1.2382181      | 2.581E-22 | -2.930346 | down      | hypothetical protein POPTR_0018s00310g [Populus trichocarpa]                              |
| c41777.graph_c0 | 0.1786047      | 0.2418949      | 0.2428999      | 2.1381709      | 2.7847809      | 2.8985628      | 3.333E-27 | 3.596308  | up        | PREDICTED: serine/threonine-protein kinase ULK4 [Sesamum indicum]                         |
| c41781.graph_c0 | 0.9658365      | 0.7751643      | 0.8464936      | 5.1691354      | 6.2446437      | 7.0605831      | 1.668E-15 | 2.87332   | up        | PREDICTED: actin-11 [Sesamum indicum]                                                     |
| c41790.graph_c0 | 221.20904      | 205.15184      | 211.41512      | 41.040593      | 69.48727       | 87.303841      | 1.454E-26 | -1.657577 | down      | PREDICTED: 5'-adenylylsulfate reductase 1, chloroplastic-like [Nicotiana sylvestris]      |
| c41799.graph_c0 | 0.4933933      | 1.1582685      | 1.2883357      | 4.3778864      | 5.9629369      | 5.2309886      | 6.654E-08 | 2.442053  | up        | NOX2 [Striga asiatica]                                                                    |
| c41799.graph_c1 | 0.7247753      | 1.1417264      | 0.9059909      | 2.9906816      | 4.0379842      | 4.4525436      | 3.646E-12 | 2.086186  | up        | PREDICTED: respiratory burst oxidase homolog protein A [Sesamum indicum]                  |
| c41829.graph_c0 | 7.093289       | 5.9663672      | 6.4277995      | 1.8928982      | 2.6068849      | 2.3580052      | 1.352E-05 | -1.469932 | down      | PREDICTED: uncharacterized protein LOC105164835 isoform X1 [Sesamum indicum]              |
| c41848.graph_c0 | 17.014214      | 16.140075      | 17.425296      | 7.097924       | 8.9654263      | 8.2589793      | 2.36E-10  | -1.018062 | down      | PREDICTED: LOW QUALITY PROTEIN: F-box protein SKIP14-like [Sesamum indicum]               |
| c41859.graph_c0 | 1.8296377      | 2.4320983      | 1.7210619      | 5.2826234      | 4.8114521      | 5.6176068      | 2.98E-06  | 1.436113  | up        | PREDICTED: probable microtubule-binding protein TANGLED [Sesamum indicum]                 |
| c41861.graph_c0 | 0.5943664      | 0.7805922      | 0.5290889      | 4.2806999      | 2.6846505      | 3.0471529      | 3.562E-07 | 2.445939  | up        | PREDICTED: calcium-transporting ATPase 2, plasma membrane-type-like [Sesamum indicum]     |
| c41869.graph_c0 | 209.90314      | 200.4605       | 205.99769      | 805.9563       | 647.75196      | 492.26897      | 2.185E-05 | 1.707623  | up        | PREDICTED: probable L-aminoethanethiol dioxygenase [Sesamum indicum]                      |
| c41876.graph_c1 | 58.579208      | 59.342334      | 57.934062      | 151.12472      | 133.75255      | 130.66115      | 5.258E-18 | 1.285442  | up        | PREDICTED: phospho-2-dehydro-3-deoxyheptonate aldolase 1, chloroplastic [Sesamum indicum] |
| c41892.graph_c0 | 4.7248924      | 6.9206188      | 7.4253566      | 14.329594      | 14.334497      | 16.697875      | 1.019E-08 | 1.290717  | up        | PREDICTED: tetraspanin-10 [Nicotiana sylvestris]                                          |
| c41894.graph_c0 | 0.860422       | 1.7609288      | 1.1701622      | 6.2530497      | 5.7000203      | 5.8227133      | 1.661E-08 | 2.273591  | up        | PREDICTED: pleckstrin homology domain-containing family A member 8-like [Sesamum indicum] |
| c41898.graph_c0 | 0.2735775      | 0.2352522      | 0.350801       | 2.0311378      | 2.5016213      | 2.8064487      | 3.443E-18 | 3.130413  | up        | PREDICTED: kinesin-3-like [Sesamum indicum]                                               |

| #ID             | 28 h-1<br>FPKM | 28 h-2<br>FPKM | 28 h-3<br>FPKM | 48 h-1<br>FPKM | 48 h-2<br>FPKM | 48 h-3<br>FPKM | FDR       | log2FC    | regulated | nr_annotation                                                                                    |
|-----------------|----------------|----------------|----------------|----------------|----------------|----------------|-----------|-----------|-----------|--------------------------------------------------------------------------------------------------|
| c41899.graph_c0 | 18.952038      | 17.136821      | 18.27852       | 245.54619      | 240.23352      | 190.17139      | 4.386E-39 | 3.680535  | up        | hypothetical protein AALP_AA7G017200 [Arabis alpina]                                             |
| c41905.graph_c0 | 7.1745481      | 7.4033649      | 7.7843856      | 3.1979844      | 4.0231036      | 2.6677006      | 0.0037226 | -1.136549 | down      | -                                                                                                |
| c41909.graph_c0 | 496.13506      | 487.68197      | 469.37529      | 1537.8587      | 1369.5052      | 1605.16        | 2.206E-20 | 1.677777  | up        | hypothetical protein MIMGU_mgv1a015091mg [Erythranthe guttata]                                   |
| c41920.graph_c0 | 5.2261479      | 5.4177914      | 6.4757131      | 1.1040879      | 0.9097256      | 0.9824108      | 9.853E-10 | -2.469403 | down      | -                                                                                                |
| c41941.graph_c0 | 3.8467653      | 4.9872571      | 7.0022263      | 25.130454      | 42.384349      | 21.137195      | 6.015E-05 | 2.52104   | up        | 60S ribosomal protein L35 [Galdieria sulphuraria]                                                |
| c41953.graph_c0 | 17.690321      | 16.386628      | 16.701654      | 5.7768593      | 7.0614023      | 7.3909596      | 3.825E-11 | -1.289854 | down      | PREDICTED: potassium transporter 6-like isoform X2 [Sesamum indicum]                             |
| c41953.graph_c1 | 24.821505      | 24.362673      | 25.519733      | 8.0274619      | 10.23719       | 9.5462845      | 1.93E-15  | -1.387541 | down      | PREDICTED: potassium transporter 6-like isoform X2 [Sesamum indicum]                             |
| c41962.graph_c0 | 14.221737      | 12.618435      | 11.83379       | 4.7193176      | 5.275255       | 5.9437496      | 7.277E-17 | -1.239759 | down      | PREDICTED: thyroid adenoma-associated protein homolog [Sesamum indicum]                          |
| c41964.graph_c0 | 0.7493132      | 0.4566777      | 0.5044326      | 1.3297336      | 1.6099332      | 1.5423713      | 0.000385  | 1.428543  | up        | hypothetical protein M569_02915, partial [Genlisea aurea]                                        |
| c41968.graph_c0 | 1.1711773      | 1.22015        | 1.3232369      | 0.0570982      | 0.1209773      | 0              | 1.873E-13 | -4.344309 | down      | -                                                                                                |
| c41980.graph_c0 | 2.2258684      | 3.2990244      | 2.0904475      | 0.2129398      | 0.1127919      | 0.4736813      | 1.527E-09 | -3.213262 | down      | PREDICTED: probable serine/threonine-protein kinase At5g41260, partial [Sesamum indicum]         |
| c41985.graph_c0 | 1.9389224      | 1.9279476      | 1.1816018      | 4.6043491      | 4.9766229      | 5.8685642      | 5.93E-08  | 1.653625  | up        | PREDICTED: probable GABA transporter 2 [Sesamum indicum]                                         |
| c41997.graph_c0 | 12.387378      | 12.573422      | 12.842314      | 25.902937      | 42.415556      | 47.769413      | 1.233E-05 | 1.651082  | up        | unnamed protein product [Coffea canephora]                                                       |
| c42000.graph_c0 | 24.859175      | 24.153181      | 24.226391      | 56.847134      | 67.860105      | 66.112949      | 1.573E-22 | 1.420487  | up        | hypothetical protein MIMGU_mgv1a002552mg [Erythranthe guttata]                                   |
| c42048.graph_c0 | 2.5097143      | 2.6800241      | 2.4811173      | 6.5766178      | 8.8142284      | 7.4304695      | 1.265E-09 | 1.610941  | up        | PREDICTED: probable glucan 1,3-beta-glucosidase A [Beta vulgaris subsp. vulgaris]                |
| c42052.graph_c0 | 1.9739257      | 1.9172903      | 3.0993912      | 0.5686582      | 0.6827477      | 0.4047909      | 1.041E-05 | -2.036008 | down      | PREDICTED: homeobox-leucine zipper protein HOX11-like [Sesamum indicum]                          |
| c42077.graph_c0 | 0.3171219      | 0.442512       | 0.4469644      | 1.8637039      | 3.0583351      | 3.8043639      | 1.302E-07 | 2.886155  | up        | PREDICTED: high-affinity nitrate transporter 3.1-like [Sesamum indicum]                          |
| c42078.graph_c0 | 13.623833      | 16.64485       | 15.667933      | 4.6950671      | 4.5164883      | 2.2088684      | 3.127E-14 | -1.959651 | down      | PREDICTED: uncharacterized protein LOC105156356 isoform X1 [Sesamum indicum]                     |
| c42081.graph_c0 | 6.925054       | 7.4332494      | 7.2314274      | 2.4144659      | 3.6199853      | 3.6231108      | 5.029E-07 | -1.125862 | down      | PREDICTED: PHD finger protein MALE STERILITY 1 [Sesamum indicum]                                 |
| c42089.graph_c0 | 3.3730158      | 3.3334017      | 3.9299771      | 8.9127052      | 8.089864       | 8.2143785      | 8.806E-10 | 1.289043  | up        | PREDICTED: U-box domain-containing protein 9-like [Sesamum indicum]                              |
| c42100.graph_c0 | 20.960362      | 24.926609      | 22.186599      | 50.198578      | 54.092612      | 57.567693      | 3.278E-19 | 1.289914  | up        | PREDICTED: 4-hydroxy-3-methylbut-2-en-1-yl diphosphate synthase, chloroplastic [Sesamum indicum] |
| c42120.graph_c0 | 107.83328      | 112.0976       | 101.08003      | 358.46448      | 304.67128      | 257.05002      | 1.594E-08 | 1.566417  | up        | PREDICTED: chaperone protein dnaJ 11, chloroplastic-like [Sesamum indicum]                       |
| c42129.graph_c1 | 1.4429727      | 1.578476       | 2.1058311      | 6.4017595      | 5.2913631      | 5.3832665      | 2.68E-08  | 1.781049  | up        | PREDICTED: cytochrome P450 90A1 [Sesamum indicum]                                                |
| c42160.graph_c0 | 26.941863      | 28.333272      | 23.973642      | 8.8744527      | 10.576582      | 9.6590317      | 1.828E-09 | -1.405103 | down      | -                                                                                                |
| c42202.graph_c0 | 3.1850737      | 3.0539713      | 3.3119925      | 1.8221513      | 1.0597991      | 1.3670115      | 0.0031222 | -1.117801 | down      | hypothetical protein MIMGU_mgv1a025142mg [Erythranthe guttata]                                   |

| #ID             | 28 h-1<br>FPKM | 28 h-2<br>FPKM | 28 h-3<br>FPKM | 48 h-1<br>FPKM | 48 h-2<br>FPKM | 48 h-3<br>FPKM | FDR       | log2FC    | regulated | nr_annotation                                                                                 |
|-----------------|----------------|----------------|----------------|----------------|----------------|----------------|-----------|-----------|-----------|-----------------------------------------------------------------------------------------------|
| c42204.graph_c0 | 0.1962429      | 0.0354378      | 0.1601326      | 9.9003417      | 17.919557      | 17.707064      | 2.786E-25 | 6.890701  | up        | PREDICTED: probable 2-oxoglutarate-dependent dioxygenase AOP1 [Sesamum indicum]               |
| c42207.graph_c0 | 0.0939329      | 0.1696252      | 0.3065939      | 19.526965      | 27.750119      | 28.393254      | 3.041E-53 | 7.086408  | up        | -                                                                                             |
| c42219.graph_c0 | 41.079276      | 48.543931      | 45.981008      | 106.21373      | 108.31128      | 132.20161      | 1.341E-19 | 1.39447   | up        | PREDICTED: uncharacterized protein LOC105161471 [Sesamum indicum]                             |
| c42248.graph_c0 | 0.4055235      | 0.5315077      | 0.5443903      | 1.2767865      | 1.2120706      | 1.4459162      | 0.0001957 | 1.450798  | up        | PREDICTED: 65-kDa microtubule-associated protein 5 [Sesamum indicum]                          |
| c42251.graph_c0 | 28.170222      | 30.028407      | 28.903072      | 7.7442302      | 11.172862      | 12.226424      | 6.088E-20 | -1.448992 | down      | PREDICTED: ATPase family AAA domain-containing protein At1g05910 isoform X1 [Sesamum indicum] |
| c42274.graph_c0 | 24.733384      | 24.247763      | 23.156047      | 7.5144776      | 9.4832118      | 8.9881907      | 3.596E-21 | -1.434797 | down      | PREDICTED: lysine-specific histone demethylase 1 homolog 1 [Sesamum indicum]                  |
| c42279.graph_c0 | 62.263278      | 62.281351      | 64.837261      | 445.0601       | 284.96309      | 220.30786      | 0.0004077 | 2.380909  | up        | PREDICTED: transcription factor bHLH130-like [Sesamum indicum]                                |
| c42293.graph_c1 | 4.1151481      | 3.7930011      | 5.8064159      | 1.7387511      | 2.0722455      | 1.8372172      | 0.0043407 | -1.240875 | down      | hypothetical protein CISIN_1g015935mg [Citrus sinensis]                                       |
| c42301.graph_c0 | 11.476845      | 11.35305       | 10.769764      | 22.142526      | 22.482766      | 23.014555      | 3.035E-12 | 1.051158  | up        | hypothetical protein JCGZ_08911 [Jatropha curcas]                                             |
| c42329.graph_c1 | 109.22825      | 97.748263      | 105.81121      | 45.106877      | 50.797518      | 50.227286      | 4.683E-13 | -1.058102 | down      | PREDICTED: probable N-acetyltransferase HLS1 isoform X2 [Sesamum indicum]                     |
| c42335.graph_c0 | 17.653703      | 15.229578      | 17.569571      | 0.9624675      | 1.4565966      | 1.1928398      | 1.292E-53 | -3.768417 | down      | PREDICTED: vetispiradiene synthase 3-like [Sesamum indicum]                                   |
| c42358.graph_c0 | 23.8791        | 21.727079      | 31.447077      | 62.173171      | 53.855728      | 63.744296      | 1.685E-11 | 1.265068  | up        | hypothetical protein MIMGU_mgv1a016283mg [Erythranthe guttata]                                |
| c42360.graph_c0 | 46.067126      | 45.484516      | 41.975054      | 77.560324      | 93.56117       | 105.37603      | 7.075E-13 | 1.087872  | up        | PREDICTED: UDP-glycosyltransferase 73D1 [Sesamum indicum]                                     |
| c42372.graph_c1 | 57.225312      | 51.268555      | 59.063028      | 11.058658      | 15.984444      | 15.343615      | 1.29E-24  | -1.947566 | down      | -                                                                                             |
| c42373.graph_c0 | 56.991472      | 55.666864      | 54.496121      | 19.771789      | 27.566615      | 26.313397      | 3.329E-15 | -1.146054 | down      | PREDICTED: ethylene-responsive transcription factor ERF118-like [Sesamum indicum]             |
| c42388.graph_c0 | 1.7089936      | 2.0002642      | 1.3428757      | 2.8081346      | 4.3348223      | 5.1401031      | 0.0002841 | 1.315401  | up        | PREDICTED: ATP-citrate synthase beta chain protein 2-like [Citrus sinensis]                   |
| c42389.graph_c0 | 13.048047      | 12.843686      | 12.113846      | 4.4421869      | 6.0083454      | 6.3446294      | 4.663E-12 | -1.141983 | down      | PREDICTED: protein FAR1-RELATED SEQUENCE 3-like [Sesamum indicum]                             |
| c42395.graph_c0 | 2.3223401      | 2.2149881      | 1.8683203      | 26.825323      | 25.563182      | 32.796833      | 1.299E-57 | 3.774294  | up        | PREDICTED: tetraketide alpha-pyrone reductase 1-like [Sesamum indicum]                        |
| c42399.graph_c0 | 11.76225       | 9.4803906      | 10.186527      | 19.227436      | 22.817738      | 25.606184      | 9.073E-14 | 1.143847  | up        | PREDICTED: scarecrow-like protein 14 [Sesamum indicum]                                        |
| c42403.graph_c0 | 11.628072      | 10.974937      | 12.176347      | 21.587222      | 29.327227      | 33.735064      | 1.162E-07 | 1.318454  | up        | PREDICTED: LOW QUALITY PROTEIN: protein YIF1B-like [Sesamum indicum]                          |
| c42413.graph_c0 | 428.57195      | 499.41029      | 475.07777      | 106.85838      | 100.20372      | 84.04512       | 1.402E-48 | -2.22395  | down      | PREDICTED: extra-large guanine nucleotide-binding protein 3-like [Sesamum indicum]            |
| c42434.graph_c1 | 5.6825936      | 5.0697677      | 5.0785643      | 10.461654      | 11.446226      | 15.336492      | 4.824E-05 | 1.27215   | up        | PREDICTED: uncharacterized protein LOC105170092 [Sesamum indicum]                             |
| c42438.graph_c0 | 0.6668897      | 0.8901184      | 0.9937138      | 5.9540766      | 9.2278176      | 8.8298359      | 4.276E-21 | 3.268986  | up        | PREDICTED: uncharacterized protein LOC105168396 [Sesamum indicum]                             |
| c42443.graph_c0 | 0.8811301      | 1.1933668      | 0.8660621      | 0.1269202      | 0.1344565      | 0.1129328      | 1.93E-09  | -2.930813 | down      | putative retroelement pol polyprotein [Arabidopsis thaliana]                                  |
| c42453.graph_c0 | 1.2222145      | 1.5633555      | 1.3713109      | 4.7122925      | 4.2398679      | 5.8299508      | 6.506E-09 | 1.871736  | up        | hypothetical protein MIMGU_mgv1a006178mg [Erythranthe guttata]                                |

| #ID             | 28 h-1<br>FPKM | 28 h-2<br>FPKM | 28 h-3<br>FPKM | 48 h-1<br>FPKM | 48 h-2<br>FPKM | 48 h-3<br>FPKM | FDR       | log2FC    | regulated | nr_annotation                                                                                           |
|-----------------|----------------|----------------|----------------|----------------|----------------|----------------|-----------|-----------|-----------|---------------------------------------------------------------------------------------------------------|
| c42464.graph_c0 | 6.5773876      | 7.1265172      | 8.2096669      | 2.8408657      | 3.3039655      | 3.2696352      | 9.343E-06 | -1.179822 | down      | -                                                                                                       |
| c42466.graph_c0 | 0.6010114      | 0.5024601      | 0.8173673      | 1.6647314      | 1.4945602      | 1.9582864      | 0.0004059 | 1.454662  | up        | PREDICTED: TSL-kinase interacting protein 1 isoform X2 [Sesamum indicum]                                |
| c42486.graph_c0 | 0.2174632      | 0.441785       | 0.2883533      | 5.1684493      | 9.7461147      | 9.2590283      | 8.846E-16 | 4.705152  | up        | hypothetical protein MIMGU_mgv1a023633mg [Erythranthe guttata]                                          |
| c42491.graph_c0 | 43.48765       | 46.485717      | 48.674369      | 14.791553      | 12.555351      | 13.243183      | 1.173E-31 | -1.727348 | down      | PREDICTED: bidirectional sugar transporter SWEET50 [Sesamum indicum]                                    |
| c42500.graph_c0 | 0.914178       | 1.1136579      | 1.1367037      | 2.7038386      | 3.8191856      | 4.1243303      | 1.495E-09 | 1.785537  | up        | PREDICTED: LOW QUALITY PROTEIN: intracellular protein transport protein USO1-like [Sesamum indicum]     |
| c42500.graph_c1 | 1.4284215      | 2.0518443      | 1.2185612      | 2.8805469      | 4.5337911      | 5.7852677      | 0.0007106 | 1.523214  | up        | PREDICTED: paramyosin-like [Sesamum indicum]                                                            |
| c42509.graph_c0 | 0.3587528      | 0.5232556      | 0.4278498      | 1.3292563      | 1.3340708      | 1.3383911      | 0.0001618 | 1.653581  | up        | PREDICTED: putative late blight resistance protein homolog R1B-14 [Sesamum indicum]                     |
| c42522.graph_c0 | 0.5911654      | 0.7199647      | 0.5048227      | 2.1434771      | 2.0861399      | 2.4499673      | 2.228E-08 | 1.920857  | up        | hypothetical protein MIMGU_mgv1a005054mg [Erythranthe guttata]                                          |
| c42530.graph_c1 | 0.5096056      | 0.4001096      | 0.3615948      | 0.7302186      | 0.8033311      | 1.2245178      | 0.0064529 | 1.154133  | up        | PREDICTED: inactive protein kinase SELMODRAFT_444075 [Sesamum indicum]                                  |
| c42531.graph_c0 | 1.8350609      | 1.4531722      | 1.0555406      | 2.4976706      | 3.7366881      | 4.1224899      | 4.199E-05 | 1.288131  | up        | PREDICTED: probable LRR receptor-like serine/threonine-protein kinase MRH1 isoform X1 [Sesamum indicum] |
| c42544.graph_c0 | 5.4761715      | 4.7473477      | 5.1810977      | 10.193094      | 13.705594      | 14.363863      | 1.613E-12 | 1.348683  | up        | PREDICTED: non-lysosomal glucosylceramidase isoform X3 [Sesamum indicum]                                |
| c42556.graph_c0 | 636.66845      | 652.30468      | 682.79034      | 140.44969      | 133.73377      | 122.79444      | 2.123E-33 | -2.268581 | down      | PREDICTED: LOW QUALITY PROTEIN: low-temperature-induced 65 kDa protein [Sesamum indicum]                |
| c42575.graph_c0 | 1.7656293      | 1.8780959      | 1.8551983      | 2.7286         | 4.9367907      | 4.9376228      | 0.0007393 | 1.228275  | up        | PREDICTED: nucleobase-ascorbate transporter 2 [Sesamum indicum]                                         |
| c42622.graph_c1 | 2.1706869      | 2.0895087      | 2.5617437      | 1.0005475      | 0.8672389      | 1.0926177      | 0.0016253 | -1.161902 | down      | PREDICTED: glycosyltransferase family protein 64 protein C5-like [Sesamum indicum]                      |
| c42629.graph_c0 | 0.8615546      | 1.113469       | 1.406043       | 2.3019415      | 2.1890938      | 3.2676791      | 8.567E-05 | 1.237263  | up        | PREDICTED: DNA polymerase alpha catalytic subunit [Sesamum indicum]                                     |
| c42672.graph_c0 | 1.2754914      | 1.7134292      | 1.5738784      | 5.5207097      | 5.973848       | 5.8245776      | 3.676E-09 | 1.965311  | up        | PREDICTED: uncharacterized protein LOC105171447 isoform X1 [Sesamum indicum]                            |
| c42679.graph_c0 | 1.7451472      | 1.9046975      | 1.9404308      | 0.534794       | 0.6180539      | 0.7137848      | 0.0001313 | -1.544363 | down      | PREDICTED: probable methyltransferase PMT10 [Sesamum indicum]                                           |
| c42680.graph_c0 | 0.0647041      | 0.7594829      | 0.2111922      | 2.952621       | 4.691916       | 4.4516859      | 8.364E-14 | 3.582923  | up        | PREDICTED: uncharacterized protein LOC104243668 [Nicotiana glauca]                                      |
| c42692.graph_c0 | 63.887801      | 63.236817      | 60.758675      | 120.03132      | 135.12766      | 155.37116      | 3.341E-12 | 1.1664    | up        | PREDICTED: multiple C2 and transmembrane domain-containing protein 1 [Sesamum indicum]                  |
| c42697.graph_c0 | 0.566938       | 0.7678378      | 0.5204439      | 12.576125      | 11.467193      | 12.389106      | 7.092E-42 | 4.339501  | up        | PREDICTED: micronuclear linker histone polyprotein-like [Sesamum indicum]                               |
| c42712.graph_c0 | 6.7085176      | 7.5548124      | 7.0982777      | 15.208254      | 17.49722       | 19.144652      | 7.29E-16  | 1.31812   | up        | PREDICTED: phosphoglucomutase, chloroplastic [Sesamum indicum]                                          |
| c42724.graph_c0 | 1.8465657      | 2.1833373      | 2.242236       | 4.5141263      | 5.018326       | 6.1489341      | 2.662E-06 | 1.360317  | up        | PREDICTED: U-box domain-containing protein 11-like [Sesamum indicum]                                    |
| c42742.graph_c0 | 0.2631767      | 0.4118815      | 0.3722335      | 1.1787055      | 1.5314191      | 1.3258479      | 2.445E-06 | 1.98467   | up        | PREDICTED: uncharacterized protein LOC105163391 [Sesamum indicum]                                       |
| c42749.graph_c0 | 2.0118747      | 1.5239381      | 1.4984401      | 0.8557716      | 0.6890056      | 0.7005436      | 0.0026265 | -1.118387 | down      | -                                                                                                       |

| #ID             | 28 h-1<br>FPKM | 28 h-2<br>FPKM | 28 h-3<br>FPKM | 48 h-1<br>FPKM | 48 h-2<br>FPKM | 48 h-3<br>FPKM | FDR       | log2FC    | regulated | nr_annotation                                                                   |
|-----------------|----------------|----------------|----------------|----------------|----------------|----------------|-----------|-----------|-----------|---------------------------------------------------------------------------------|
| c42770.graph_c0 | 26.000943      | 24.872878      | 25.62179       | 9.1365355      | 11.481628      | 8.6562503      | 2.069E-15 | -1.345891 | down      | PREDICTED: E3 ubiquitin-protein ligase Topors [Sesamum indicum]                 |
| c42772.graph_c0 | 0.2853819      | 0.1220557      | 0.3186632      | 0.6854069      | 0.7261055      | 1.2366827      | 0.0003506 | 1.901674  | up        | PREDICTED: testis-expressed sequence 11 protein [Sesamum indicum]               |
| c42782.graph_c2 | 6.622163       | 7.1002908      | 5.8680054      | 13.968273      | 17.785018      | 17.213714      | 1.386E-07 | 1.359791  | up        | hypothetical protein MIMGU_mgv1a014334mg [Erythranthe guttata]                  |
| c42789.graph_c1 | 0.2666096      | 0.3691094      | 0.3190752      | 1.2841999      | 1.3365864      | 1.002345       | 4.897E-06 | 1.967881  | up        | PREDICTED: ABC transporter G family member 15-like isoform X1 [Sesamum indicum] |
| c42796.graph_c0 | 117.35345      | 109.23029      | 108.71852      | 53.246657      | 53.892018      | 52.961828      | 1.524E-11 | -1.024414 | down      | PREDICTED: putative oxidoreductase TDA3 [Sesamum indicum]                       |
| c42810.graph_c0 | 8.7744221      | 9.6089491      | 8.8434865      | 18.665518      | 20.240493      | 20.380891      | 1.451E-12 | 1.163321  | up        | hypothetical protein MIMGU_mgv1a004563mg [Erythranthe guttata]                  |
| c42825.graph_c0 | 9.3190224      | 7.987396       | 9.9461336      | 2.0971551      | 4.0352992      | 3.008507       | 6.835E-08 | -1.543879 | down      | PREDICTED: protein SULFUR DEFICIENCY-INDUCED 1 [Sesamum indicum]                |
| c42828.graph_c0 | 5.237542       | 4.267192       | 4.9916549      | 20.461514      | 21.649019      | 18.783418      | 3.223E-35 | 2.112577  | up        | hypothetical protein ARALYDRAFT_319569 [Arabidopsis lyrata subsp. lyrata]       |
| c42843.graph_c0 | 0.76716        | 0.9445548      | 0.8346617      | 2.0037988      | 2.3725209      | 1.8354083      | 0.0010098 | 1.327608  | up        | Receptor-like protein kinase [Medicago truncatula]                              |
| c42849.graph_c0 | 2.1929859      | 1.3860424      | 2.2964718      | 5.2352356      | 4.5644872      | 4.369715       | 0.0003075 | 1.314551  | up        | PREDICTED: monothiol glutaredoxin-S10-like [Sesamum indicum]                    |
| c42856.graph_c1 | 0.2579144      | 0              | 0.2104561      | 19.288607      | 11.082815      | 12.0722        | 4.862E-13 | 6.552599  | up        | PREDICTED: uncharacterized protein LOC105158011 [Sesamum indicum]               |
| c42860.graph_c1 | 1.1568571      | 1.3140906      | 0.7917302      | 5.7236967      | 4.5100879      | 6.1451652      | 7.093E-11 | 2.372472  | up        | hypothetical protein MIMGU_mgv1a007855mg [Erythranthe guttata]                  |
| c42889.graph_c0 | 107.0236       | 101.10945      | 101.59671      | 38.127932      | 38.459384      | 29.90824       | 6.882E-24 | -1.496181 | down      | hypothetical protein MIMGU_mgv1a002860mg [Erythranthe guttata]                  |
| c42906.graph_c0 | 0.7351761      | 0.9719857      | 1.0069711      | 2.6625425      | 2.6090928      | 2.6060257      | 6.144E-05 | 1.579731  | up        | PREDICTED: ABC transporter G family member 24-like [Sesamum indicum]            |
| c42906.graph_c1 | 1.9986598      | 2.1268528      | 1.572644       | 4.4335348      | 4.249479       | 4.4548219      | 8.118E-05 | 1.248223  | up        | PREDICTED: ABC transporter G family member 24-like [Sesamum indicum]            |
| c42921.graph_c0 | 1.9620868      | 2.4307731      | 2.0850842      | 5.0898576      | 6.3724664      | 9.1607795      | 2.541E-05 | 1.705835  | up        | PREDICTED: protein notum homolog isoform X1 [Sesamum indicum]                   |
| c42922.graph_c0 | 2.3279386      | 2.4337909      | 2.2994903      | 16.307239      | 17.522336      | 21.955137      | 1.229E-37 | 3.02076   | up        | PREDICTED: root phototropism protein 3-like [Sesamum indicum]                   |
| c42923.graph_c1 | 0.0776514      | 0.0467413      | 0.0633629      | 1.7389091      | 2.0159524      | 2.9193791      | 3.402E-18 | 5.187441  | up        | PREDICTED: phosphate transporter PHO1 homolog 1 [Sesamum indicum]               |
| c42926.graph_c0 | 12.206135      | 12.639899      | 13.533365      | 29.370908      | 26.94774       | 25.900718      | 2.093E-14 | 1.14324   | up        | PREDICTED: neutral ceramidase isoform X1 [Sesamum indicum]                      |
| c42945.graph_c0 | 68.381942      | 75.767394      | 73.771666      | 35.533067      | 34.017191      | 35.141527      | 2.056E-12 | -1.0149   | down      | PREDICTED: cell division cycle protein 48 homolog [Solanum lycopersicum]        |
| c42957.graph_c0 | 1.5107724      | 1.4651292      | 1.346924       | 3.8300305      | 6.8751285      | 5.5536769      | 3.186E-07 | 1.944437  | up        | PREDICTED: putative pectate lyase 2 [Sesamum indicum]                           |
| c42982.graph_c0 | 3.3920247      | 3.8668477      | 3.6647144      | 7.0379601      | 8.7536439      | 9.0194716      | 3.136E-08 | 1.221374  | up        | PREDICTED: uncharacterized protein LOC10511946 [Sesamum indicum]                |
| c42991.graph_c0 | 31.82317       | 30.383864      | 29.111128      | 66.698823      | 79.237678      | 94.53148       | 2.076E-13 | 1.434343  | up        | PREDICTED: proline transporter 3 [Sesamum indicum]                              |
| c43005.graph_c0 | 3.3711347      | 3.5210274      | 3.1820907      | 0.8147977      | 1.4578141      | 2.1750064      | 0.0001844 | -1.150066 | down      | PREDICTED: myosin heavy chain, striated muscle [Sesamum indicum]                |
| c43044.graph_c1 | 7.2301238      | 7.5958709      | 8.5747512      | 38.252721      | 40.04169       | 53.993283      | 3.033E-19 | 2.537433  | up        | PREDICTED: uncharacterized protein LOC100243914 [Vitis vinifera]                |
| c43055.graph_c0 | 0.1565787      | 0.1237039      | 0.1117961      | 0.8435189      | 1.445539       | 1.6114922      | 3.502E-10 | 3.346502  | up        | PREDICTED: uncharacterized protein LOC105115800 [Sesamum indicum]               |
| c43058.graph_c0 | 2.3456988      | 2.4365751      | 1.863255       | 3.8942939      | 4.1255321      | 4.9869622      | 0.0006211 | 1.008619  | up        | unnamed protein product [Coffea canephora]                                      |
| c43066.graph_c0 | 4.7091826      | 3.6399272      | 4.483097       | 1.3566445      | 1.7246404      | 1.3680853      | 8.174E-05 | -1.489093 | down      | PREDICTED: transcription factor TCP5-like [Sesamum indicum]                     |



| #ID             | 28 h-1<br>FPKM | 28 h-2<br>FPKM | 28 h-3<br>FPKM | 48 h-1<br>FPKM | 48 h-2<br>FPKM | 48 h-3<br>FPKM | FDR       | log2FC    | regulated | nr_annotation                                                                                       |
|-----------------|----------------|----------------|----------------|----------------|----------------|----------------|-----------|-----------|-----------|-----------------------------------------------------------------------------------------------------|
| c43068.graph_c1 | 1.3533299      | 1.3177676      | 1.5590204      | 0.0336362      | 0.1425338      | 0.1496464      | 2.533E-12 | -3.677246 | down      | hypothetical protein MIMGU_mgv1a002927mg [Erythranthe guttata]                                      |
| c43079.graph_c0 | 4.2233444      | 4.6174459      | 4.7121709      | 9.0680042      | 10.069412      | 10.54758       | 1.066E-10 | 1.170801  | up        | PREDICTED: AIP-dependent DNA helicase DDJ1 [Sesamum indicum]                                        |
| c43082.graph_c1 | 8.1270652      | 7.0473649      | 9.9145984      | 0.713976       | 1.08053        | 3.7209934      | 8.828E-07 | -2.160367 | down      | PREDICTED: auxin-responsive protein IAA28-like [Sesamum indicum]                                    |
| c43111.graph_c0 | 6.7276351      | 5.9602905      | 6.521162       | 23.660564      | 30.082371      | 30.066702      | 1.712E-47 | 2.162787  | up        | PREDICTED: alpha-mannosidase [Sesamum indicum]                                                      |
| c43121.graph_c0 | 37.097398      | 36.220825      | 37.686684      | 14.440344      | 14.600458      | 12.995358      | 6.844E-18 | -1.358081 | down      | PREDICTED: transcription factor bHLH4/ isoform X5 [Sesamum indicum]                                 |
| c43126.graph_c0 | 12.153829      | 11.893725      | 11.936542      | 5.627295       | 5.9858689      | 5.5201592      | 2.816E-08 | -1.028953 | down      | PREDICTED: uncharacterized protein LOC105159445 [Sesamum indicum]                                   |
| c43143.graph_c0 | 3.9224773      | 3.5416292      | 4.0809045      | 8.9807272      | 6.7486791      | 8.1569001      | 1.399E-05 | 1.094834  | up        | PREDICTED: vacuolar amino acid transporter 1-like isoform X1 [Eucalyptus grandis]                   |
| c43145.graph_c0 | 1.1224805      | 1.1923467      | 0.8081779      | 16.153268      | 12.501826      | 15.527396      | 4.621E-38 | 3.86836   | up        | PREDICTED: G2/mitotic-specific cyclin-2-like [Sesamum indicum]                                      |
| c43147.graph_c0 | 37.846126      | 38.29565       | 44.193393      | 17.920856      | 7.886066       | 6.1330268      | 2.018E-08 | -1.851824 | down      | hypothetical protein [Asterochloris sp. DA2]                                                        |
| c43150.graph_c0 | 36.539449      | 39.987767      | 39.991567      | 15.465594      | 15.468976      | 15.584104      | 5.231E-19 | -1.282618 | down      | PREDICTED: patellin-3 [Sesamum indicum]                                                             |
| c43172.graph_c0 | 23.126242      | 19.834032      | 22.007663      | 10.867143      | 10.283336      | 9.2909963      | 5.035E-09 | -1.049721 | down      | PREDICTED: RING-H2 finger protein ATL47 [Sesamum indicum]                                           |
| c43183.graph_c3 | 0.1451691      | 0.1310741      | 0.1184568      | 1.1654128      | 1.8844102      | 3.0017764      | 1.096E-05 | 3.96893   | up        | PREDICTED: uncharacterized protein LOC105179145 [Sesamum indicum]                                   |
| c43185.graph_c0 | 317.30619      | 365.41056      | 361.75137      | 36.489148      | 33.930727      | 30.237788      | 1.012E-80 | -3.330641 | down      | PREDICTED: poly [ADP-ribose] polymerase 3 [Sesamum indicum]                                         |
| c43205.graph_c0 | 12.488042      | 11.996342      | 12.035843      | 17.395599      | 27.336501      | 30.29241       | 0.0004157 | 1.071902  | up        | PREDICTED: protein TRANSPARENT TESTA 12-like [Sesamum indicum]                                      |
| c43218.graph_c1 | 10.545784      | 11.006914      | 11.184224      | 3.6791443      | 3.2046993      | 3.0554351      | 1.735E-10 | -1.674381 | down      | hypothetical protein CICLE_v10026263mg [Citrus clementina]                                          |
| c43229.graph_c0 | 12.703475      | 14.215015      | 14.667842      | 2.3702767      | 2.8512236      | 2.2995536      | 8.201E-47 | -2.426923 | down      | unnamed protein product [Vitis vinifera]                                                            |
| c43238.graph_c0 | 0.2203867      | 0.1989885      | 0.1634852      | 3.8855934      | 2.8249221      | 3.4573777      | 9.32E-25  | 4.171764  | up        | PREDICTED: kinesin-like protein KIF22 [Sesamum indicum]                                             |
| c43247.graph_c0 | 1.7353528      | 1.7031097      | 1.4160338      | 3.729905       | 6.2816843      | 7.829075       | 9.152E-05 | 1.909457  | up        | -                                                                                                   |
| c43253.graph_c0 | 17.705898      | 17.390482      | 13.884049      | 1.3137676      | 3.0155178      | 3.6043627      | 6.057E-13 | -2.598352 | down      | PREDICTED: ethylene-responsive transcription factor CRF4-like [Sesamum indicum]                     |
| c43253.graph_c1 | 3.7159116      | 4.2619089      | 3.1960537      | 0.7213807      | 0.7642154      | 0.7551532      | 2.221E-08 | -2.276488 | down      | PREDICTED: ethylene-responsive transcription factor CRF4-like [Sesamum indicum]                     |
| c43254.graph_c0 | 2.1010994      | 2.3426259      | 1.7404569      | 5.266067       | 5.1726429      | 4.5420913      | 3.966E-07 | 1.320551  | up        | PREDICTED: LOW QUALITY PROTEIN: linoleate 13S-lipoxygenase 3-1, chloroplastic [Sesamum indicum]     |
| c43258.graph_c0 | 4.1179862      | 3.4414555      | 3.8916304      | 0.9225783      | 1.9547197      | 1.2745624      | 6.962E-06 | -1.432226 | down      | PREDICTED: zinc finger BED domain-containing protein DAYSLEEPER-like isoform X1 [Sesamum indicum]   |
| c43260.graph_c0 | 10.584786      | 11.423433      | 12.214079      | 23.987963      | 28.235931      | 23.997314      | 4.296E-11 | 1.195404  | up        | PREDICTED: UPF0057 membrane protein At2g24040-like [Sesamum indicum]                                |
| c43264.graph_c0 | 13.678072      | 9.6583461      | 11.399682      | 91.505918      | 65.149572      | 59.467301      | 5.748E-09 | 2.687161  | up        | PREDICTED: chlorophyll a-b binding protein CP26, chloroplastic [Sesamum indicum]                    |
| c43269.graph_c0 | 29.083759      | 27.217186      | 31.419976      | 12.095161      | 10.613083      | 10.300188      | 1.494E-18 | -1.365279 | down      | PREDICTED: AP2-like ethylene-responsive transcription factor At2g41710 isoform X1 [Sesamum indicum] |

| #ID             | 28 h-1<br>FPKM | 28 h-2<br>FPKM | 28 h-3<br>FPKM | 48 h-1<br>FPKM | 48 h-2<br>FPKM | 48 h-3<br>FPKM | FDR       | log2FC    | regulated | nr_annotation                                                                                    |
|-----------------|----------------|----------------|----------------|----------------|----------------|----------------|-----------|-----------|-----------|--------------------------------------------------------------------------------------------------|
| c43274.graph_c0 | 1.2078993      | 1.2786577      | 1.3594979      | 2.560635       | 2.6567507      | 4.0401161      | 0.0001164 | 1.304775  | up        | PREDICTED: uncharacterized protein LOC105179654 [Sesamum indicum]                                |
| c43280.graph_c1 | 7.9897837      | 7.5919031      | 6.2712326      | 3.617014       | 3.5252448      | 2.9180136      | 0.0007093 | -1.074592 | down      | hypothetical protein MIMGU_mgv1a000521mg [Erythranthe guttata]                                   |
| c43284.graph_c0 | 0.4859381      | 0.3133975      | 0.4248445      | 1.9798789      | 1.3982944      | 1.0178621      | 0.0012521 | 1.896164  | up        | -                                                                                                |
| c43292.graph_c0 | 0.3774052      | 0.3097832      | 0.2239706      | 1.739596       | 1.6586019      | 1.9735497      | 5.66E-09  | 2.601648  | up        | PREDICTED: protein NSP-INTERACTING KINASE 2 [Sesamum indicum]                                    |
| c43307.graph_c1 | 1.1093976      | 0.7929983      | 0.8298211      | 10.31245       | 19.428747      | 14.858793      | 5.454E-14 | 4.061519  | up        | PREDICTED: uncharacterized protein LOC105160011 [Sesamum indicum]                                |
| c43310.graph_c0 | 13.580142      | 13.701344      | 12.782799      | 5.4195802      | 5.2943127      | 5.632616       | 2.669E-12 | -1.251157 | down      | PREDICTED: mitochondrial aspartate-glutamate transporter AGC1 [Sesamum indicum]                  |
| c43313.graph_c0 | 0.2093104      | 0.1889877      | 0.1423297      | 0.9286074      | 1.030592       | 2.0460001      | 0.0002771 | 2.923666  | up        | PREDICTED: 9-cis-epoxycarotenoid dioxygenase NCED1, chloroplastic [Sesamum indicum]              |
| c43320.graph_c0 | 0.0553434      | 0.0999399      | 0.1806391      | 2.5254675      | 5.6481227      | 1.3732557      | 0.0019899 | 4.861862  | up        | hypothetical protein GU11HDRAF1_114521 [Guillardia theta CCMP27121]                              |
| c43324.graph_c0 | 30.854744      | 31.749854      | 30.156401      | 14.42069       | 13.147455      | 11.548299      | 5.314E-13 | -1.20053  | down      | hypothetical protein MIMGU_mgv1a008176mg [Erythranthe guttata]                                   |
| c43328.graph_c0 | 0.7066562      | 0.5742399      | 0.7908009      | 0.2175366      | 0.2168975      | 0.3985115      | 0.0035382 | -1.278509 | down      | PREDICTED: leucine-rich repeat receptor protein kinase EXS-like [Nicotiana tomentosiformis]      |
| c43329.graph_c0 | 102.77636      | 95.613079      | 88.263849      | 43.012386      | 46.169701      | 42.296105      | 8.805E-14 | -1.08286  | down      | PREDICTED: root phototropism protein 2-like [Sesamum indicum]                                    |
| c43332.graph_c0 | 0.221587       | 0.1667269      | 0.0602711      | 2.4810873      | 2.1820772      | 1.9577332      | 2.399E-15 | 3.930541  | up        | hypothetical protein MIMGU_mgv1a020708mg [Erythranthe guttata]                                   |
| c43338.graph_c1 | 11.832087      | 14.122399      | 16.267823      | 23.832506      | 31.668388      | 34.094162      | 2.596E-06 | 1.121373  | up        | PREDICTED: calcium-dependent protein kinase 26-like [Sesamum indicum]                            |
| c43359.graph_c0 | 1.0073279      | 1.1116388      | 2.5572442      | 19.011061      | 19.238127      | 9.7203468      | 5.461E-07 | 3.404095  | up        | -                                                                                                |
| c43367.graph_c0 | 0.7006984      | 0.8102552      | 0.9930641      | 1.8387026      | 1.6507479      | 2.1906654      | 0.0003223 | 1.222922  | up        | PREDICTED: centromere-associated protein E isoform X1 [Sesamum indicum]                          |
| c43373.graph_c0 | 2.1205378      | 2.6638564      | 2.2569672      | 8.531281       | 6.8093449      | 4.1594973      | 0.0059783 | 1.5207    | up        | Activator of Hsp90 ATPase homolog 1-like protein                                                 |
| c43373.graph_c1 | 6.3571875      | 6.833267       | 6.5813098      | 24.942058      | 19.338215      | 17.900964      | 4.807E-08 | 1.701167  | up        | PREDICTED: probable galactinol--sucrose galactosyltransferase 2 [Sesamum indicum]                |
| c43374.graph_c0 | 20.851662      | 22.836019      | 25.280644      | 12.631858      | 9.8929061      | 6.046467       | 2.46E-07  | -1.220279 | down      | UPA25 [Capsicum annum]                                                                           |
| c43389.graph_c0 | 1.3793597      | 1.5793528      | 1.2968251      | 2.3059137      | 4.5769618      | 4.9039991      | 0.001419  | 1.50004   | up        | PREDICTED: ABC transporter C family member 8-like isoform X3 [Sesamum indicum]                   |
| c43393.graph_c1 | 1.0531014      | 0.9437026      | 1.0273099      | 0.5219094      | 0.3296133      | 0.5179755      | 0.0031317 | -1.096099 | down      | PREDICTED: piezo-type mechanosensitive ion channel homolog [Sesamum indicum]                     |
| c43401.graph_c0 | 2.476435       | 3.0998933      | 2.4187774      | 0.4993965      | 0.8313644      | 0.90988        | 1.217E-06 | -1.802378 | down      | PREDICTED: ABC transporter B family member 29, chloroplastic [Sesamum indicum]                   |
| c43407.graph_c0 | 58.22134       | 64.223539      | 61.459187      | 27.029371      | 26.793562      | 30.320899      | 3.203E-13 | -1.086737 | down      | PREDICTED: uncharacterized protein LOC105176746 isoform X1 [Sesamum indicum]                     |
| c43415.graph_c0 | 299.6263       | 302.1091       | 301.09159      | 136.21419      | 142.77725      | 147.81185      | 7.24E-10  | -1.03995  | down      | hypothetical protein MIMGU_mgv1a002107mg [Erythranthe guttata]                                   |
| c43433.graph_c0 | 15.255601      | 17.163558      | 16.972598      | 39.308141      | 30.659394      | 31.830042      | 1.488E-06 | 1.09024   | up        | PREDICTED: probable 1-acylglycerol-3-phosphate O-acyltransferase [Beta vulgaris subsp. vulgaris] |

| #ID             | 28 h-1<br>FPKM | 28 h-2<br>FPKM | 28 h-3<br>FPKM | 48 h-1<br>FPKM | 48 h-2<br>FPKM | 48 h-3<br>FPKM | FDR       | log2FC    | regulated | nr_annotation                                                                                     |
|-----------------|----------------|----------------|----------------|----------------|----------------|----------------|-----------|-----------|-----------|---------------------------------------------------------------------------------------------------|
| c43442.graph_c0 | 17.183363      | 18.686914      | 17.199687      | 66.376123      | 43.482645      | 34.224989      | 0.0078153 | 1.494261  | up        | PREDICTED: uncharacterized protein LOC105168876 [Sesamum indicum]                                 |
| c43456.graph_c1 | 0.2139194      | 0.1931491      | 0.5934919      | 1.3557928      | 1.1490384      | 1.5924166      | 4.443E-06 | 2.074116  | up        | PREDICTED: putative Myb family transcription factor At1g14600 [Sesamum indicum]                   |
| c43457.graph_c0 | 1.5158468      | 1.5102538      | 3.1989274      | 6.0293695      | 10.037321      | 5.4828065      | 0.0009591 | 1.82668   | up        | ADP ribosylation factor [Karlodinium veneficum]                                                   |
| c43467.graph_c0 | 5.7212666      | 5.6722151      | 5.3092823      | 14.575353      | 16.495314      | 16.385302      | 1.803E-08 | 1.546417  | up        | hypothetical protein VITISV_020777 [Vitis vinifera]                                               |
| c43471.graph_c0 | 7.6839637      | 6.4523538      | 6.640599       | 16.798832      | 17.972844      | 20.824064      | 4.325E-23 | 1.459527  | up        | PREDICTED: pentatricopeptide repeat-containing protein MRL1, chloroplastic [Sesamum indicum]      |
| c43484.graph_c0 | 25.241809      | 24.400345      | 25.027559      | 13.399675      | 11.04695       | 8.2733832      | 1.461E-14 | -1.141801 | down      | PREDICTED: histone-lysine N-methyltransferase ASHR2 [Sesamum indicum]                             |
| c43489.graph_c0 | 1.2005745      | 1.2558609      | 1.4455944      | 0.2227049      | 0.4325361      | 0.726592       | 0.0004812 | -1.470349 | down      | PREDICTED: pentatricopeptide repeat-containing protein At1g43980, mitochondrial [Sesamum indicum] |
| c43491.graph_c0 | 12.170168      | 12.082286      | 11.930702      | 22.461393      | 25.913607      | 30.916359      | 3.993E-12 | 1.169787  | up        | PREDICTED: cytochrome b561 and DOMON domain-containing protein At4g17280 [Sesamum indicum]        |
| c43492.graph_c0 | 0.3346101      | 0.6042432      | 0.307169       | 1.3254469      | 1.0671542      | 0.9906747      | 0.0008039 | 1.489489  | up        | PREDICTED: actin-related protein 2/3 complex subunit 2B [Sesamum indicum]                         |
| c43512.graph_c0 | 15.35754       | 13.914317      | 15.107213      | 27.939416      | 30.951902      | 33.027435      | 1.467E-12 | 1.089964  | up        | PREDICTED: malonyl-CoA-acyl carrier protein transacylase, mitochondrial [Sesamum indicum]         |
| c43515.graph_c1 | 3.7560203      | 3.1401242      | 4.0108331      | 0.6465599      | 1.1208303      | 1.7259155      | 0.0001846 | -1.61343  | down      | -                                                                                                 |
| c43516.graph_c0 | 31.150448      | 26.53818       | 27.967492      | 67.950481      | 59.929078      | 56.01475       | 5.541E-11 | 1.147459  | up        | PREDICTED: solute carrier family 25 member 44-like [Nicotiana tomentosiformis]                    |
| c43520.graph_c0 | 2.2669991      | 2.3880355      | 2.7747791      | 5.2682452      | 5.0736973      | 6.0878609      | 0.0020648 | 1.185886  | up        | PREDICTED: uncharacterized protein LOC105165005 [Sesamum indicum]                                 |
| c43561.graph_c0 | 3.2723148      | 3.7389988      | 3.5444896      | 0.917677       | 1.3999212      | 2.384307       | 0.0034266 | -1.136052 | down      | PREDICTED: uncharacterized protein LOC105156369 [Sesamum indicum]                                 |
| c43566.graph_c1 | 0.1104661      | 0.797924       | 1.2619517      | 2.9405013      | 4.1534728      | 3.9869568      | 2.504E-07 | 2.386888  | up        | PREDICTED: protein ECERIFERUM 1-like [Sesamum indicum]                                            |
| c43570.graph_c0 | 14.544101      | 14.007424      | 16.845779      | 78.966333      | 85.988054      | 76.187432      | 9.006E-59 | 2.450353  | up        | PREDICTED: ferritin-3, chloroplastic [Sesamum indicum]                                            |
| c43571.graph_c0 | 0              | 0.0763483      | 0.2069968      | 2.6795985      | 6.2451614      | 5.3408111      | 4.358E-10 | 5.680253  | up        | -                                                                                                 |
| c43574.graph_c0 | 42.5068        | 43.529081      | 46.329449      | 25.57901       | 20.71039       | 16.190702      | 8.956E-11 | -1.034546 | down      | PREDICTED: uncharacterized Rho GTPase-activating protein At5g61530 [Sesamum indicum]              |
| c43576.graph_c1 | 16.348355      | 18.285292      | 17.356009      | 4.9834973      | 9.6092878      | 10.336033      | 1.189E-06 | -1.029996 | down      | PREDICTED: uncharacterized protein C683.02c [Sesamum indicum]                                     |
| c43590.graph_c0 | 2.7702748      | 3.0640906      | 2.3452912      | 6.3207493      | 5.4870553      | 6.5615255      | 0.0001556 | 1.210945  | up        | PREDICTED: uncharacterized protein LOC101267356 [Solanum lycopersicum]                            |
| c43599.graph_c0 | 0.1833333      | 0.3724487      | 0.5983938      | 1.626719       | 1.907952       | 2.1194727      | 3.177E-07 | 2.32959   | up        | PREDICTED: uncharacterized protein At5g27210-like [Sesamum indicum]                               |
| c43607.graph_c0 | 11.541847      | 10.806581      | 13.669963      | 5.2975087      | 6.4956703      | 5.1549731      | 7.903E-09 | -1.048011 | down      | -                                                                                                 |
| c43632.graph_c0 | 58.051968      | 59.890007      | 57.290484      | 117.09522      | 127.39707      | 119.77819      | 4.282E-14 | 1.096819  | up        | PREDICTED: uncharacterized protein LOC105174142 [Sesamum indicum]                                 |
| c43633.graph_c0 | 3.0175863      | 5.5925949      | 5.5726321      | 25.466533      | 50.864987      | 18.181714      | 0.0039891 | 2.771464  | up        | hypothetical protein SELMODRAFT_227399 [Selaginella moellendorffii]                               |

| #ID             | 28 h-1<br>FPKM | 28 h-2<br>FPKM | 28 h-3<br>FPKM | 48 h-1<br>FPKM | 48 h-2<br>FPKM | 48 h-3<br>FPKM | FDR       | log2FC    | regulated | nr_annotation                                                                                          |
|-----------------|----------------|----------------|----------------|----------------|----------------|----------------|-----------|-----------|-----------|--------------------------------------------------------------------------------------------------------|
| c43644.graph_c0 | 0.5240283      | 0.5534944      | 0.71805        | 2.656978       | 3.4387699      | 3.7358237      | 3.233E-19 | 2.489131  | up        | PREDICTED: kinesin-like protein KIN12B [Sesamum indicum]                                               |
| c43646.graph_c0 | 16.223519      | 14.801435      | 14.391418      | 4.9440798      | 7.1353534      | 5.1642929      | 1.532E-06 | -1.359521 | down      | --                                                                                                     |
| c43651.graph_c0 | 94.249744      | 90.779736      | 95.785322      | 161.34687      | 182.68651      | 205.1667       | 5.846E-11 | 1.006399  | up        | PREDICTED: UDP-glucose 4-epimerase GEPI48 [Sesamum indicum]                                            |
| c43672.graph_c0 | 6.1169661      | 6.3233251      | 6.0711654      | 14.969398      | 16.193532      | 16.00896       | 1.559E-19 | 1.390279  | up        | unnamed protein product [Coffea canephora]                                                             |
| c43680.graph_c0 | 1.6695517      | 2.2269127      | 2.3840959      | 7.1183954      | 8.7639541      | 8.9445016      | 1.54E-10  | 2.020791  | up        | PREDICTED: probable receptor protein kinase 1MK1 [Sesamum indicum]                                     |
| c43685.graph_c0 | 5.1591878      | 6.0745113      | 5.7210852      | 22.948664      | 22.915583      | 23.936526      | 1.025E-38 | 2.083429  | up        | PREDICTED: uncharacterized protein LOC105159738 isoform X2 [Sesamum indicum]                           |
| c43691.graph_c0 | 0.7263296      | 0.6810309      | 0.524293       | 1.0269082      | 2.4383623      | 2.3631123      | 0.004017  | 1.621736  | up        | PREDICTED: dirigent protein 21-like [Sesamum indicum]                                                  |
| c43693.graph_c0 | 1.894339       | 2.5972901      | 2.1182708      | 0.3557354      | 0.9421464      | 0.3165313      | 1.175E-05 | -2.002684 | down      | PREDICTED: uncharacterized protein LOC105171544 [Sesamum indicum]                                      |
| c43695.graph_c0 | 0              | 0              | 0              | 1.1355793      | 1.7095385      | 1.2231541      | 6.616E-21 | Inf       | up        | PREDICTED: nudix hydrolase 3-like [Cicer arietinum]                                                    |
| c43696.graph_c0 | 6.7570392      | 7.3316412      | 7.5014564      | 3.6024652      | 3.1932934      | 3.0746171      | 0.0001395 | -1.084337 | down      | PREDICTED: F-box/kelch-repeat protein At1g30090-like isoform X2 [Sesamum indicum]                      |
| c43713.graph_c0 | 35.931112      | 36.325846      | 35.287179      | 181.50249      | 263.58705      | 348.12311      | 3.176E-09 | 2.916044  | up        | PREDICTED: fatty-acid-binding protein 1-like [Nicotiana sylvestris]                                    |
| c43736.graph_c0 | 0.1831985      | 0.3308221      | 0.1494885      | 3.5993725      | 7.3801911      | 6.7153388      | 1.356E-11 | 4.768803  | up        | unnamed protein product [Coffea canephora]                                                             |
| c43736.graph_c1 | 0.3043056      | 0.2442306      | 0.275901       | 6.3431117      | 9.1715612      | 12.088972      | 7.527E-17 | 5.098434  | up        | hypothetical protein MIMGU_mgv1a003774mg [Erythranthe guttata]                                         |
| c43738.graph_c0 | 1.1624229      | 1.1485739      | 1.1453918      | 4.0867571      | 4.6239423      | 5.1453426      | 1.221E-10 | 2.042048  | up        | Wee1-like protein kinase [Morus notabilis]                                                             |
| c43741.graph_c0 | 1.3408991      | 1.2819242      | 0.7938043      | 4.0659212      | 3.9189829      | 4.5964262      | 2.012E-08 | 1.922824  | up        | unnamed protein product [Coffea canephora]                                                             |
| c43745.graph_c0 | 18.017736      | 18.535475      | 19.298533      | 40.215226      | 46.658429      | 44.049775      | 1.173E-16 | 1.268713  | up        | hypothetical protein L484_019510 [Morus notabilis]                                                     |
| c43764.graph_c1 | 23.759807      | 23.674783      | 26.958286      | 10.863742      | 10.331348      | 9.7622003      | 3.312E-13 | -1.221476 | down      | PREDICTED: uncharacterized protein LOC105178804 isoform X1 [Sesamum indicum]                           |
| c43765.graph_c0 | 0.2012593      | 0.4240093      | 0.3831938      | 3.5715533      | 8.19786        | 2.4212927      | 0.0034354 | 3.848177  | up        | hypothetical protein EMIHODRAF1_44419 / [Emilia nuxleyi CCMP15161]                                     |
| c43782.graph_c0 | 16.459056      | 18.09803       | 16.289413      | 34.496356      | 55.965919      | 55.50769       | 4.262E-07 | 1.555099  | up        | PREDICTED: pentatricopeptide repeat-containing protein At1g06140, mitochondrial-like [Sesamum indicum] |
| c43783.graph_c0 | 51.013848      | 49.094406      | 50.276625      | 115.95097      | 109.23697      | 102.10499      | 1.079E-15 | 1.165809  | up        | PREDICTED: uncharacterized protein LOC105165767 [Sesamum indicum]                                      |
| c43815.graph_c0 | 103.78905      | 102.49832      | 98.737669      | 41.251548      | 47.397056      | 47.881157      | 2.207E-12 | -1.120269 | down      | PREDICTED: aldehyde dehydrogenase family 2 member B7, mitochondrial [Sesamum indicum]                  |
| c43816.graph_c0 | 4.7684535      | 5.4715302      | 6.0797173      | 10.829489      | 22.945061      | 22.745476      | 0.000422  | 1.821406  | up        | hypothetical protein VITISV_012452 [Vitis vinifera]                                                    |
| c43818.graph_c0 | 20.28739       | 20.684881      | 20.043842      | 8.9375982      | 9.3657568      | 9.1871435      | 1.672E-10 | -1.108819 | down      | PREDICTED: pentatricopeptide repeat-containing protein At3g61360 [Sesamum indicum]                     |
| c43837.graph_c0 | 2.1779041      | 1.9664432      | 1.9040914      | 1.0352452      | 0.7833691      | 0.7018324      | 0.0057611 | -1.213927 | down      | PREDICTED: PHD finger protein ING2 isoform X2 [Sesamum indicum]                                        |
| c43839.graph_c0 | 53.592588      | 48.618233      | 64.302341      | 19.382492      | 20.987805      | 26.954994      | 1.593E-09 | -1.268465 | down      | PREDICTED: flavanone 3-dioxygenase-like [Sesamum indicum]                                              |
| c43841.graph_c0 | 1.8189915      | 1.7727263      | 1.6020824      | 0.219591       | 0.4652601      | 0.3256513      | 3.272E-07 | -2.330279 | down      | -                                                                                                      |

| #ID             | 28 h-1<br>FPKM | 28 h-2<br>FPKM | 28 h-3<br>FPKM | 48 h-1<br>FPKM | 48 h-2<br>FPKM | 48 h-3<br>FPKM | FDR       | log2FC    | regulated | nr_annotation                                                                                            |
|-----------------|----------------|----------------|----------------|----------------|----------------|----------------|-----------|-----------|-----------|----------------------------------------------------------------------------------------------------------|
| c43843.graph_c0 | 2.6191382      | 2.5963586      | 2.7649031      | 5.362997       | 7.157145       | 7.0236677      | 5.889E-08 | 1.328936  | up        | PREDICTED: interactor of constitutive active ROPs 2, chloroplastic-like isoform X2 [Sesamum indicum]     |
| c43849.graph_c1 | 2.3483875      | 2.5915678      | 2.1611211      | 4.0682306      | 5.2383305      | 6.0331451      | 4.767E-07 | 1.147726  | up        | PREDICTED: alpha-1,4 glucan phosphorylase L-2 isozyme, chloroplastic/amyloplastic-like [Sesamum indicum] |
| c43854.graph_c0 | 3.5320249      | 4.2157113      | 3.7112017      | 1.0732778      | 2.2090435      | 2.2101339      | 0.0029857 | -1.030922 | down      | PREDICTED: uncharacterized protein LOC105167611 [Sesamum indicum]                                        |
| c43865.graph_c0 | 35.993596      | 30.444482      | 33.650989      | 14.420397      | 16.167801      | 13.829163      | 1.223E-12 | -1.13106  | down      | PREDICTED: chavicol O-methyltransferase-like [Sesamum indicum]                                           |
| c43873.graph_c0 | 3.4977948      | 4.2810894      | 3.4884324      | 0.5911617      | 1.0437735      | 1.8410423      | 0.0003164 | -1.667904 | down      | hypothetical protein MIMGU_mgv1a024870mg, partial [Erythranthe guttata]                                  |
| c43877.graph_c0 | 0.3113209      | 0.1923272      | 0.2941462      | 1.0384796      | 0.6160802      | 0.7207456      | 0.0007557 | 1.624934  | up        | PREDICTED: probable cyclic nucleotide-gated ion channel 20, chloroplastic isoform X1 [Sesamum indicum]   |
| c43880.graph_c0 | 0.3281939      | 0.1693305      | 0.3443188      | 1.4263197      | 1.1332596      | 2.7497832      | 0.0012968 | 2.693429  | up        | hypothetical protein MIMGU_mgv1a002490mg [Erythranthe guttata]                                           |
| c43889.graph_c0 | 4.5662597      | 5.0670809      | 5.3188376      | 1.1045936      | 0.8425317      | 0.9042319      | 6.419E-10 | -2.343712 | down      | PREDICTED: uncharacterized protein LOC102584927 isoform X1 [Solanum tuberosum]                           |
| c43902.graph_c1 | 8.5115157      | 8.8254704      | 9.4546068      | 2.018582       | 2.2121823      | 3.2825681      | 4.409E-07 | -1.797469 | down      | PREDICTED: uncharacterized protein LOC105175250 [Sesamum indicum]                                        |
| c43903.graph_c0 | 3.3875502      | 4.6971975      | 3.3565448      | 18.326048      | 17.46468       | 21.901074      | 1.317E-17 | 2.375713  | up        | PREDICTED: uncharacterized protein LOC105156092 [Sesamum indicum]                                        |
| c43909.graph_c2 | 1.3049623      | 0.9257746      | 1.2930182      | 2.7175088      | 2.5033661      | 3.3642059      | 0.002416  | 1.325242  | up        | unnamed protein product [Coffea canephora]                                                               |
| c43909.graph_c3 | 1.4648321      | 1.5728288      | 1.4214271      | 4.014665       | 4.3062139      | 4.0187528      | 9.429E-05 | 1.50999   | up        | PREDICTED: AP2-like ethylene-responsive transcription factor ANT [Sesamum indicum]                       |
| c43921.graph_c0 | 10.014391      | 10.11234       | 9.9060548      | 23.833592      | 34.9641        | 44.857387      | 7.364E-06 | 1.820489  | up        | PREDICTED: hexose carrier protein HEX6-like [Sesamum indicum]                                            |
| c43921.graph_c1 | 0.3940568      | 0.5929939      | 1.1790062      | 4.3289657      | 5.8207104      | 10.222317      | 7.986E-05 | 3.264177  | up        | PREDICTED: hexose carrier protein HEX6-like [Sesamum indicum]                                            |
| c43942.graph_c0 | 0.106672       | 0.1733667      | 0.1566783      | 1.5955331      | 1.4897329      | 1.8528233      | 2.137E-14 | 3.540829  | up        | lupeol synthase [Olea europaea]                                                                          |
| c43952.graph_c0 | 0.5994547      | 0.7134677      | 0.7781934      | 1.2779345      | 1.5733545      | 1.7517463      | 0.0061823 | 1.175456  | up        | hypothetical protein MIMGU_mgv1a021758mg [Erythranthe guttata]                                           |
| c43962.graph_c0 | 5.6605411      | 4.9553876      | 5.0206036      | 14.22552       | 11.236563      | 9.5766116      | 0.0001384 | 1.212438  | up        | PREDICTED: uncharacterized protein LOC105172459 [Sesamum indicum]                                        |
| c43967.graph_c1 | 55.747206      | 63.747686      | 60.990249      | 22.373554      | 25.022711      | 21.308993      | 6.03E-18  | -1.352069 | down      | phytosulfokine precursor [Avicennia marina]                                                              |
| c43975.graph_c0 | 622.96461      | 774.25772      | 672.94699      | 116.25821      | 110.7692       | 108.66788      | 9.296E-50 | -2.581026 | down      | PREDICTED: WD repeat-containing protein 82-B isoform X1 [Sesamum indicum]                                |
| c43993.graph_c0 | 85.682307      | 82.216125      | 90.813484      | 58.913171      | 18.256385      | 24.248978      | 0.0006862 | -1.28698  | down      | hypothetical protein M569_00228 [Genlisea aurea]                                                         |
| c44014.graph_c1 | 71.090609      | 73.452996      | 71.84737       | 296.19546      | 268.32051      | 242.90115      | 2.682E-24 | 1.94471   | up        | PREDICTED: uncharacterized protein LOC105173450 [Sesamum indicum]                                        |
| c44019.graph_c0 | 0.3376254      | 0.6774313      | 0.7040545      | 3.4237206      | 2.6698874      | 2.5809828      | 3.593E-08 | 2.382529  | up        | hypothetical protein MIMGU_mgv1a010335mg [Erythranthe guttata]                                           |
| c44025.graph_c0 | 0.0771765      | 0.5574653      | 0.4093402      | 1.1739231      | 1.7099901      | 1.1751184      | 1.247E-05 | 1.997319  | up        | PREDICTED: WAT1-related protein At1g25270-like [Sesamum indicum]                                         |
| c44028.graph_c0 | 0.1653025      | 0.7462635      | 0.269771       | 56.993016      | 73.917662      | 88.00031       | 1.594E-52 | 7.571559  | up        | -                                                                                                        |
| c44030.graph_c0 | 17.007413      | 16.942284      | 19.591122      | 13.328616      | 5.6753722      | 3.7043685      | 0.0046748 | -1.173465 | down      | PREDICTED: RING-H2 finger protein ATL3 [Sesamum indicum]                                                 |

| #ID             | 28 h-1<br>FPKM | 28 h-2<br>FPKM | 28 h-3<br>FPKM | 48 h-1<br>FPKM | 48 h-2<br>FPKM | 48 h-3<br>FPKM | FDR       | log2FC    | regulated | nr_annotation                                                                                               |
|-----------------|----------------|----------------|----------------|----------------|----------------|----------------|-----------|-----------|-----------|-------------------------------------------------------------------------------------------------------------|
| c44040.graph_c0 | 0.5432439      | 0.5937612      | 0.9448919      | 1.3409612      | 1.6701482      | 1.7252727      | 0.0013785 | 1.222718  | up        | PREDICTED: LOW QUALITY PROTEIN: ATP-dependent DNA helicase Q-like 5 [Sesamum indicum]                       |
| c44041.graph_c0 | 1.777924       | 1.1358245      | 1.3823388      | 3.7844305      | 4.1217616      | 3.5565412      | 9.596E-07 | 1.45729   | up        | PREDICTED: kinesin-like protein NACK1 [Sesamum indicum]                                                     |
| c44044.graph_c0 | 2.2259841      | 2.6961469      | 2.3258587      | 4.404447       | 6.0876425      | 5.9091932      | 7.696E-05 | 1.214723  | up        | PREDICTED: scarecrow-like protein 3 isoform X1 [Sesamum indicum]                                            |
| c44052.graph_c0 | 2.4358389      | 1.9286469      | 1.9570458      | 0.6650227      | 1.0567663      | 0.5071999      | 0.0007592 | -1.465773 | down      | PREDICTED: ferredoxin--nitrite reductase, chloroplastic [Sesamum indicum]                                   |
| c44058.graph_c0 | 76.513388      | 84.213655      | 76.375723      | 33.05879       | 38.593927      | 37.457608      | 8.319E-14 | -1.080165 | down      | PREDICTED: AP2-like ethylene-responsive transcription factor AIL1, partial [Sesamum indicum]                |
| c44077.graph_c1 | 2.5165926      | 2.9308695      | 2.5594584      | 6.056313       | 6.7587652      | 7.5279647      | 1.336E-05 | 1.384548  | up        | PREDICTED: uncharacterized protein LOC105169472 [Sesamum indicum]                                           |
| c44088.graph_c0 | 2.4542899      | 2.9880173      | 2.7908322      | 0.7426242      | 0.6804067      | 0.6786415      | 2.535E-08 | -1.925887 | down      | hypothetical protein MIMGU_mgv1a001438mg [Erythranthe guttata]                                              |
| c44089.graph_c0 | 4.9748162      | 3.392737       | 3.9298538      | 9.7272571      | 8.6702871      | 7.7001922      | 0.0006575 | 1.130896  | up        | PREDICTED: aquaporin AQPcic-like [Sesamum indicum]                                                          |
| c44094.graph_c0 | 55.30178       | 57.231399      | 55.170414      | 102.08227      | 110.77542      | 113.90287      | 6.63E-12  | 1.002695  | up        | PREDICTED: selenoprotein K [Sesamum indicum]                                                                |
| c44100.graph_c0 | 4.84769        | 5.2210609      | 5.0127016      | 9.5134432      | 11.746107      | 10.995469      | 3.092E-11 | 1.135447  | up        | PREDICTED: probable LRR receptor-like serine/threonine-protein kinase At4g36180 [Sesamum indicum]           |
| c44106.graph_c1 | 3.9976264      | 3.2084283      | 2.7183588      | 8.8677503      | 11.48193       | 12.524557      | 5.323E-06 | 1.764783  | up        | phospholipase D [Plantago major]                                                                            |
| c44106.graph_c2 | 6.4857211      | 5.1739074      | 5.1569811      | 27.162424      | 25.855703      | 27.119944      | 4.179E-49 | 2.295335  | up        | PREDICTED: phospholipase D alpha 1 [Sesamum indicum]                                                        |
| c44107.graph_c0 | 0.1184966      | 1.176905       | 0.7735384      | 3.6048774      | 4.614541       | 5.8805968      | 1.718E-09 | 2.805103  | up        | -                                                                                                           |
| c44108.graph_c0 | 1.2987818      | 1.156391       | 1.2511472      | 4.2758109      | 4.117912       | 4.5573709      | 6.531E-10 | 1.846882  | up        | PREDICTED: homeobox-leucine zipper protein GLABRA 2 [Sesamum indicum]                                       |
| c44112.graph_c1 | 7.1095737      | 7.8925555      | 7.3864235      | 38.460658      | 40.274878      | 51.048275      | 4.128E-31 | 2.57454   | up        | PREDICTED: 2-hydroxyisotriavanone dehydratase-like [Sesamum indicum]                                        |
| c44131.graph_c0 | 8.9284555      | 10.30088       | 11.932107      | 4.2754905      | 4.6892237      | 4.6099234      | 1.433E-08 | -1.15865  | down      | PREDICTED: glutamyl-tRNA(Gln) amidotransferase subunit A, mitochondrial isoform X4 [Sesamum indicum]        |
| c44133.graph_c0 | 38.712873      | 40.201524      | 36.284897      | 18.659255      | 19.253784      | 17.788814      | 4.686E-12 | -1.005973 | down      | PREDICTED: polygalacturonase At1g48100 [Sesamum indicum]                                                    |
| c44140.graph_c0 | 0.2244199      | 0.221051       | 0.2330679      | 1.2413179      | 1.5889895      | 1.5187112      | 6.259E-10 | 2.717911  | up        | PREDICTED: receptor-like serine/threonine-protein kinase At1g78530 [Sesamum indicum]                        |
| c44159.graph_c0 | 82.916308      | 78.887133      | 85.27079       | 21.828689      | 44.631573      | 52.058554      | 1.907E-05 | -1.030906 | down      | PREDICTED: proton-coupled amino acid transporter 3-like [Sesamum indicum]                                   |
| c44162.graph_c0 | 0.9179077      | 0.5697894      | 0.7490052      | 1.9270728      | 2.3881697      | 2.6529286      | 3.258E-05 | 1.676276  | up        | PREDICTED: probable leucine-rich repeat receptor-like protein kinase At5g49770 isoform X3 [Sesamum indicum] |
| c44162.graph_c1 | 1.284154       | 1.6368997      | 1.6437006      | 3.8938566      | 4.0912569      | 5.2254947      | 1.764E-06 | 1.572079  | up        | hypothetical protein MIMGU_mgv1a0019072mg, partial [Erythranthe guttata]                                    |
| c44170.graph_c0 | 39.574386      | 41.217624      | 38.766697      | 120.05469      | 116.08185      | 137.48811      | 1.923E-28 | 1.685259  | up        | PREDICTED: pyruvate, phosphate dikinase, chloroplastic [Populus euphratica]                                 |
| c44199.graph_c0 | 122.95975      | 126.56337      | 128.4747       | 65.233485      | 61.587282      | 52.818146      | 3.671E-12 | -1.028699 | down      | PREDICTED: F-box/LRR-repeat protein 14 [Sesamum indicum]                                                    |
| c44225.graph_c0 | 13.28907       | 12.886366      | 12.9234        | 23.859727      | 33.441234      | 35.602746      | 6.063E-09 | 1.284017  | up        | unnamed protein product [Coffea canephora]                                                                  |

| #ID             | 28 h-1<br>FPKM | 28 h-2<br>FPKM | 28 h-3<br>FPKM | 48 h-1<br>FPKM | 48 h-2<br>FPKM | 48 h-3<br>FPKM | FDR       | log2FC    | regulated | nr_annotation                                                                                                     |
|-----------------|----------------|----------------|----------------|----------------|----------------|----------------|-----------|-----------|-----------|-------------------------------------------------------------------------------------------------------------------|
| c44237.graph_c0 | 22.96182       | 22.939125      | 22.256065      | 8.2006495      | 7.8602039      | 7.181065       | 4.966E-21 | -1.508314 | down      | PREDICTED: serine/threonine-protein kinase UCNL-like [Sesamum indicum]                                            |
| c44239.graph_c0 | 1.7416772      | 2.4051089      | 2.5915897      | 10.77879       | 23.525524      | 15.946321      | 4.127E-06 | 2.929455  | up        | ribosomal protein L41 [Cryptococcus gattii R265]                                                                  |
| c44265.graph_c0 | 1.3251867      | 1.7947791      | 1.8923477      | 12.283331      | 8.8975727      | 10.742803      | 4.471E-12 | 2.717869  | up        | Cold shock, CspA, partial [Metarhizium brunneum ARSEF 3297]                                                       |
| c44271.graph_c2 | 0.2358553      | 0.1597164      | 0.192456       | 1.6443017      | 2.0586543      | 2.4606509      | 2.625E-12 | 3.426034  | up        | -                                                                                                                 |
| c44291.graph_c0 | 0.937131       | 0.9589603      | 1.6313413      | 3.5372503      | 5.0895998      | 5.7311303      | 1.344E-09 | 2.058728  | up        | PREDICTED: ABC transporter G family member 21 [Sesamum indicum]                                                   |
| c44295.graph_c2 | 14.539249      | 25.279458      | 15.992227      | 3.7357233      | 8.3768054      | 7.9222576      | 0.0025876 | -1.448319 | down      | PREDICTED: spermidine hydroxycinnamoyl transferase-like [Sesamum indicum]                                         |
| c44303.graph_c0 | 2581.7455      | 2630.9395      | 3104.1934      | 189.6364       | 165.78839      | 151.90483      | 8.128E-45 | -3.989709 | down      | hypothetical protein MIMGU_mgv1a024110mg [Erythranthe guttata]                                                    |
| c44308.graph_c0 | 0.6333094      | 0.6019148      | 0.4351792      | 2.1547939      | 1.7008673      | 1.7669444      | 2.903E-05 | 1.798183  | up        | PREDICTED: probable leucine-rich repeat receptor-like serine/threonine-protein kinase At3g14840 [Sesamum indicum] |
| c44316.graph_c0 | 1.6970796      | 1.7876877      | 1.552658       | 3.4549149      | 3.6945923      | 3.3931793      | 0.0017094 | 1.107253  | up        | PREDICTED: uncharacterized protein LOC105169064 [Sesamum indicum]                                                 |
| c44340.graph_c1 | 1.9518341      | 2.2719106      | 3.1661724      | 0.8048256      | 0.6315667      | 0.8222221      | 2.269E-05 | -1.666261 | down      | PREDICTED: mediator of RNA polymerase II transcription subunit 25-like [Sesamum indicum]                          |
| c44359.graph_c0 | 3.5157066      | 3.7949037      | 4.4865254      | 14.575499      | 17.819239      | 21.794205      | 1.542E-16 | 2.235931  | up        | PREDICTED: glutamate dehydrogenase A [Sesamum indicum]                                                            |
| c44360.graph_c0 | 2.7400208      | 2.9935181      | 2.0793262      | 5.2792308      | 5.5191167      | 5.5627435      | 0.0002837 | 1.108142  | up        | PREDICTED: probable WKKY transcription factor 30 [Sesamum indicum]                                                |
| c44362.graph_c0 | 0.3804249      | 0.515232       | 0.9002285      | 32.790727      | 50.318723      | 50.416125      | 3.302E-45 | 6.249458  | up        | hypothetical protein MIMGU_mgv1a010045mg [Erythranthe guttata]                                                    |
| c44380.graph_c0 | 22.236963      | 21.673167      | 20.7956        | 9.1619025      | 10.352986      | 9.6417446      | 8.991E-13 | -1.109645 | down      | PREDICTED: peptidyl-prolyl cis-trans isomerase FKBP43-like isoform X3 [Sesamum indicum]                           |
| c44382.graph_c0 | 8.1453199      | 8.0832806      | 10.119468      | 15.905762      | 15.963372      | 19.780886      | 0.0004286 | 1.010832  | up        | -                                                                                                                 |
| c44385.graph_c1 | 0.5302095      | 0.2593118      | 0.3965927      | 1.4561723      | 1.6316364      | 1.2956934      | 5.926E-06 | 1.927083  | up        | hypothetical protein MIMGU_mgv1a001279mg [Erythranthe guttata]                                                    |
| c44391.graph_c0 | 89.693835      | 83.798248      | 91.097096      | 566.82457      | 583.01378      | 618.60246      | 2.489E-53 | 2.781595  | up        | PREDICTED: raucatriicine-O-beta-D-glucosidase-like [Sesamum indicum]                                              |
| c44399.graph_c0 | 66.962792      | 66.755182      | 59.76908       | 108.14202      | 147.78708      | 145.98905      | 9.095E-11 | 1.091249  | up        | PREDICTED: leucine-rich repeat extensin-like protein 4 [Sesamum indicum]                                          |
| c44427.graph_c1 | 1.242577       | 0.9284942      | 1.0488959      | 2.7156171      | 2.3014936      | 2.126379       | 0.0057554 | 1.195635  | up        | hypothetical protein MIMGU_mgv1a004986mg [Erythranthe guttata]                                                    |
| c44457.graph_c0 | 12.921526      | 13.659545      | 11.953188      | 3.9325784      | 6.4424071      | 7.9362949      | 1.329E-05 | -1.041323 | down      | hypothetical protein MIMGU_mgv1a011349mg [Erythranthe guttata]                                                    |
| c44466.graph_c0 | 314.81826      | 329.81211      | 318.67024      | 1905.3032      | 2162.7558      | 2154.6335      | 3.818E-43 | 2.731255  | up        | PREDICTED: aquaporin TIP2-1-like [Solanum tuberosum]                                                              |
| c44467.graph_c0 | 8.786939       | 8.3584613      | 8.3563595      | 16.964588      | 18.230307      | 18.494978      | 3.091E-11 | 1.114675  | up        | PREDICTED: probable LRR receptor-like serine/threonine-protein kinase At1g51880 isoform X1 [Sesamum indicum]      |
| c44514.graph_c0 | 265.1639       | 262.84738      | 289.97041      | 13.371558      | 13.369088      | 10.846709      | 7.79E-147 | -4.400036 | down      | PREDICTED: alcohol dehydrogenase 1 [Sesamum indicum]                                                              |
| c44534.graph_c0 | 110.61833      | 98.749814      | 101.7338       | 32.022704      | 38.040165      | 32.765449      | 1.918E-26 | -1.557185 | down      | PREDICTED: hippocampus abundant transcript-like protein 1 [Solanum lycopersicum]                                  |
| c44546.graph_c0 | 14.646446      | 17.97598       | 15.779961      | 455.1348       | 577.34908      | 513.31789      | 1.58E-176 | 5.035865  | up        | --                                                                                                                |
| c44560.graph_c1 | 5.7083725      | 5.7726202      | 6.1174875      | 11.504894      | 11.753666      | 12.12557       | 2.476E-08 | 1.049001  | up        | PREDICTED: uncharacterized protein LOC102583109 [Solanum tuberosum]                                               |

| #ID             | 28 h-1<br>FPKM | 28 h-2<br>FPKM | 28 h-3<br>FPKM | 48 h-1<br>FPKM | 48 h-2<br>FPKM | 48 h-3<br>FPKM | FDR       | log2FC    | regulated | nr_annotation                                                                           |
|-----------------|----------------|----------------|----------------|----------------|----------------|----------------|-----------|-----------|-----------|-----------------------------------------------------------------------------------------|
| c44561.graph_c0 | 92.635826      | 57.116278      | 97.637183      | 28.812059      | 14.109635      | 16.92996       | 6.283E-06 | -1.992688 | down      | BnaCnng13060D [Brassica napus]                                                          |
| c44568.graph_c1 | 5.5935629      | 6.5286471      | 5.7888704      | 2.248129       | 2.5648216      | 2.9236201      | 0.009929  | -1.172384 | down      | -                                                                                       |
| c44573.graph_c0 | 0.4428834      | 0.1999411      | 0.4743234      | 1.1578614      | 0.8920827      | 1.9044165      | 0.002381  | 1.861927  | up        | PREDICTED: cell division control protein 6 homolog [Sesamum indicum]                    |
| c44575.graph_c0 | 2.6696717      | 2.8345263      | 2.6423553      | 0.9086682      | 0.9626237      | 1.3940129      | 0.001121  | -1.281126 | down      | unknown protein [Arabidopsis thaliana]                                                  |
| c44590.graph_c0 | 0.9667671      | 0.9352501      | 0.9579185      | 2.0132369      | 4.9146678      | 4.361587       | 0.000922  | 2.008993  | up        | hypothetical protein MIMGU_mgv1a013990mg [Erythranthe guttata]                          |
| c44618.graph_c0 | 14.883763      | 13.58186       | 13.913932      | 4.18878        | 5.5735057      | 5.098743       | 2.592E-12 | -1.474426 | down      | PREDICTED: transcription initiation factor TFIID subunit 8-like [Sesamum indicum]       |
| c44624.graph_c0 | 0.425232       | 1.24782        | 1.6481826      | 4.1773496      | 6.1384516      | 2.6378571      | 0.0045665 | 2.003018  | up        | hypothetical protein SELMODRAFT_29765, partial [Selaginella moellendorffii]             |
| c44646.graph_c1 | 3.1873755      | 3.2164778      | 3.6526957      | 1.1585963      | 1.6679946      | 1.8239212      | 0.0025135 | -1.07814  | down      | PREDICTED: non-specific lipid-transfer protein-like protein At2g13820 [Sesamum indicum] |
| c44650.graph_c1 | 2.085165       | 3.3309458      | 2.4540542      | 0.4574596      | 0.430776       | 0.3165904      | 6.284E-09 | -2.661146 | down      | hypothetical protein MIMGU_mgv1a004154mg [Erythranthe guttata]                          |
| c44658.graph_c1 | 3.5529208      | 4.3479712      | 3.8096326      | 12.840811      | 10.803766      | 11.326323      | 2.709E-19 | 1.623767  | up        | PREDICTED: protein LONGIFOLIA 1 [Sesamum indicum]                                       |
| c44661.graph_c0 | 1.4487401      | 0.9883244      | 0.7618365      | 0.1224257      | 0.4323171      | 0.2904896      | 0.0012875 | -1.895092 | down      | hypothetical protein MIMGU_mgv1a0244072mg, partial [Erythranthe guttata]                |
| c44667.graph_c0 | 1.7667302      | 1.7059689      | 1.5417511      | 0.5598652      | 0.8896639      | 0.5258405      | 0.0020414 | -1.306789 | down      | PREDICTED: endoglucanase 24-like [Sesamum indicum]                                      |
| c44677.graph_c0 | 78.055598      | 88.448078      | 88.391439      | 12.207788      | 11.454652      | 9.2071914      | 3.041E-53 | -2.909822 | down      | PREDICTED: protein ABSCISIC ACID-INSENSITIVE 5 isoform X2 [Nicotiana tomentosiformis]   |
| c44680.graph_c0 | 3.3921471      | 2.7271425      | 2.730047       | 0.6479145      | 0.6863869      | 1.0482008      | 3.423E-05 | -1.855825 | down      | PREDICTED: uncharacterized protein LOC102579255 [Solanium tuberosum]                    |
| c44683.graph_c0 | 54.766007      | 52.753344      | 58.462176      | 663.57375      | 498.87265      | 389.50108      | 1.35E-09  | 3.27505   | up        | PREDICTED: protein FAK1-RELATED SEQUENCE 5 [Sesamum indicum]                            |
| c44686.graph_c0 | 11.024846      | 11.221745      | 10.537197      | 5.5963914      | 5.4146491      | 4.0297628      | 1.165E-06 | -1.078754 | down      | PREDICTED: cytochrome P450 734A1-like [Sesamum indicum]                                 |
| c44694.graph_c0 | 10.655592      | 12.516641      | 13.422187      | 33.439034      | 29.451042      | 28.120307      | 5.664E-07 | 1.359376  | up        | PREDICTED: crocetin glucosyltransferase, chloroplastic-like [Sesamum indicum]           |
| c44701.graph_c0 | 0.1578145      | 0.0610679      | 0.1287754      | 5.2868125      | 4.4503152      | 4.653318       | 2.485E-37 | 5.415617  | up        | hypothetical protein MIMGU_mgv1a021943mg [Erythranthe guttata]                          |
| c44705.graph_c0 | 8.0469883      | 8.6441441      | 8.1754038      | 23.020893      | 26.39525       | 25.470289      | 5.809E-20 | 1.630375  | up        | PREDICTED: pyridoxal kinase isoform X1 [Sesamum indicum]                                |
| c44713.graph_c0 | 2.2634449      | 1.9147979      | 1.8136741      | 0.9822086      | 0.9857662      | 0.8049662      | 0.0067718 | -1.067737 | down      | PREDICTED: protein ROOT PRIMORDIUM DEFECTIVE 1 [Sesamum indicum]                        |
| c44718.graph_c0 | 73.816799      | 78.024035      | 74.072724      | 25.788369      | 30.666759      | 28.018084      | 2.203E-21 | -1.379594 | down      | PREDICTED: ninja-family protein AFP3-like [Sesamum indicum]                             |
| c44743.graph_c0 | 11.363311      | 11.138905      | 11.738869      | 18.144415      | 23.58352       | 25.609776      | 3.83E-09  | 1.01216   | up        | PREDICTED: COBRA-like protein 7 [Sesamum indicum]                                       |
| c44744.graph_c0 | 0.6501106      | 0.7174309      | 0.6778419      | 1.465001       | 1.6489904      | 1.9145877      | 0.0020282 | 1.336467  | up        | PREDICTED: serine/threonine-protein kinase Nek2 [Sesamum indicum]                       |
| c44747.graph_c0 | 131.0041       | 136.26108      | 115.96475      | 230.22213      | 303.21931      | 285.83473      | 4.026E-11 | 1.133809  | up        | PREDICTED: endoplasmin homolog [Sesamum indicum]                                        |
| c44756.graph_c0 | 0.0979508      | 0              | 0              | 8.6911927      | 13.021703      | 12.704824      | 1.867E-33 | 8.492155  | up        | -                                                                                       |



| #ID             | 28 h-1<br>FPKM | 28 h-2<br>FPKM | 28 h-3<br>FPKM | 48 h-1<br>FPKM | 48 h-2<br>FPKM | 48 h-3<br>FPKM | FDR       | log2FC    | regulated | nr_annotation                                                                                                  |
|-----------------|----------------|----------------|----------------|----------------|----------------|----------------|-----------|-----------|-----------|----------------------------------------------------------------------------------------------------------------|
| c44762.graph_c5 | 22.742472      | 20.53432       | 20.651954      | 66.330954      | 64.046818      | 73.092621      | 8.718E-25 | 1.711941  | up        | unnamed protein product [Coffea canephora]                                                                     |
| c44785.graph_c0 | 26.703306      | 27.672004      | 29.487918      | 10.193245      | 8.8801133      | 7.9652874      | 1.161E-28 | -1.587238 | down      | PREDICTED: phytosulfokine receptor 2-like [Sesamum indicum]                                                    |
| c44790.graph_c1 | 0.5640367      | 0.5092722      | 0.4602493      | 6.792101       | 6.86404        | 7.753265       | 4.528E-25 | 3.844334  | up        | hypothetical protein SORBIDRAFT_07g024570 [Sorghum bicolor]                                                    |
| c44797.graph_c0 | 0.8584215      | 1.0334321      | 0.9598964      | 4.0300461      | 3.116622       | 4.661684       | 2.664E-08 | 2.093336  | up        | hypothetical protein MIMGU_mgv1a000411mg [Erythranthe guttata]                                                 |
| c44799.graph_c0 | 7.4387081      | 7.4039672      | 6.5000772      | 1.9118078      | 2.5562399      | 2.9728225      | 2.936E-11 | -1.484443 | down      | PREDICTED: uncharacterized protein LOC105170906 isoform X2 [Sesamum indicum]                                   |
| c44802.graph_c0 | 5.6756021      | 5.4226081      | 6.299322       | 2.3176087      | 2.8644296      | 2.2054022      | 4.099E-08 | -1.195928 | down      | PREDICTED: adagio protein 3 isoform X1 [Sesamum indicum]                                                       |
| c44808.graph_c0 | 128.78315      | 134.94249      | 133.98702      | 27.084358      | 31.707394      | 35.625346      | 3.873E-44 | -2.036442 | down      | hypothetical protein MIMGU_mgv1a003414mg [Erythranthe guttata]                                                 |
| c44811.graph_c0 | 5.2393231      | 5.0848928      | 4.4070806      | 16.471415      | 19.681016      | 20.851846      | 7.652E-29 | 1.990693  | up        | PREDICTED: glucose-1-phosphate adenyltransferase large subunit 3, chloroplastic/amyloplastic [Sesamum indicum] |
| c44821.graph_c0 | 0.1552329      | 0.0262801      | 0.1820864      | 1.5618549      | 1.4721995      | 2.2760918      | 3.861E-17 | 3.905465  | up        | PREDICTED: abnormal spindle-like microcephaly-associated protein homolog isoform X2 [Sesamum indicum]          |
| c44832.graph_c0 | 1.1621462      | 0.6332037      | 0.9973519      | 0.2285854      | 0.215252       | 0.1807946      | 6.942E-06 | -2.116352 | down      | Ty3/gypsy retrotransposon protein [Beta vulgaris subsp. vulgaris]                                              |
| c44848.graph_c0 | 70.945833      | 67.602796      | 61.888545      | 120.20342      | 146.30771      | 169.41014      | 1.03E-10  | 1.15828   | up        | PREDICTED: L-type lectin-domain containing receptor kinase S.4-like [Sesamum indicum]                          |
| c44849.graph_c0 | 7.1355929      | 7.5797311      | 8.1820647      | 16.493622      | 19.758886      | 24.117964      | 9.199E-11 | 1.435571  | up        | hypothetical protein MIMGU_mgv1a011926mg [Erythranthe guttata]                                                 |
| c44854.graph_c0 | 1.6200281      | 1.5475296      | 1.4943553      | 4.1962928      | 6.5578466      | 7.17638        | 1.537E-08 | 1.9769    | up        | PREDICTED: GDSL esterase/lipase At4g18970-like [Sesamum indicum]                                               |
| c44868.graph_c2 | 1.9630934      | 2.6180805      | 2.2631899      | 4.8169276      | 4.4257819      | 4.8751544      | 8.969E-05 | 1.087725  | up        | PREDICTED: uncharacterized protein LOC105178110 [Sesamum indicum]                                              |
| c44873.graph_c0 | 0.1038664      | 0.1641179      | 0.1483198      | 1.1190958      | 1.0809393      | 1.2300623      | 7.781E-11 | 3.084357  | up        | PREDICTED: monogalactosyldiacylglycerol synthase 2, chloroplastic [Sesamum indicum]                            |
| c44878.graph_c1 | 35.047293      | 32.967312      | 36.739428      | 5.5420735      | 7.2764845      | 4.6690003      | 2.593E-57 | -2.54266  | down      | Taxane 13-alpha-hydroxylase [Medicago truncatula]                                                              |
| c44880.graph_c0 | 0.1815323      | 0.3278133      | 0.9258054      | 1.7257916      | 2.0110936      | 1.1261059      | 0.0026706 | 1.801828  | up        | hypothetical protein GUILLDRAFT_152359 [Guillardia theta]                                                      |
| c44882.graph_c0 | 10.687879      | 10.989821      | 10.014015      | 21.038741      | 25.800043      | 30.689693      | 1.651E-10 | 1.327632  | up        | PREDICTED: uncharacterized protein LOC105178220 [Sesamum indicum]                                              |
| c44883.graph_c0 | 2.8218379      | 2.9067079      | 3.0160773      | 7.2797214      | 7.8987776      | 9.4584252      | 3.429E-11 | 1.533294  | up        | PREDICTED: probable protein phosphatase 2C 34 [Sesamum indicum]                                                |
| c44896.graph_c0 | 3.6729439      | 1.938774       | 2.8587649      | 0.7878923      | 1.2140746      | 0.7647947      | 0.0009309 | -1.577523 | down      | -                                                                                                              |
| c44910.graph_c0 | 27.794157      | 24.107505      | 27.348427      | 62.258856      | 58.440704      | 57.654362      | 1.059E-16 | 1.213589  | up        | PREDICTED: protein TIFY 6B [Sesamum indicum]                                                                   |
| c44910.graph_c1 | 16.023572      | 12.933322      | 17.103293      | 4.2058252      | 7.9330734      | 7.5759119      | 0.000235  | -1.193323 | down      | -                                                                                                              |
| c44911.graph_c0 | 27.695884      | 31.336144      | 26.845816      | 9.6488561      | 14.20656       | 11.083533      | 1.531E-16 | -1.260482 | down      | PREDICTED: amino-acid permease BA11 homolog [Sesamum indicum]                                                  |
| c44914.graph_c0 | 6.0074174      | 4.7927539      | 5.5504167      | 1.7324777      | 2.6036362      | 2.5094972      | 0.0002936 | -1.221369 | down      | PREDICTED: DNA-directed RNA polymerase III subunit RPC4 [Sesamum indicum]                                      |
| c44927.graph_c0 | 128.07641      | 130.3618       | 125.80482      | 267.74059      | 379.05649      | 460.17703      | 1.4E-06   | 1.560848  | up        | PREDICTED: S-adenosylmethionine synthase 1 [Sesamum indicum]                                                   |
| c44935.graph_c0 | 19.672322      | 19.701159      | 19.334223      | 67.795789      | 81.303115      | 78.756135      | 6.222E-43 | 1.99544   | up        | PREDICTED: ABC transporter B family member 19 [Sesamum indicum]                                                |

| #ID             | 28 h-1<br>FPKM | 28 h-2<br>FPKM | 28 h-3<br>FPKM | 48 h-1<br>FPKM | 48 h-2<br>FPKM | 48 h-3<br>FPKM | FDR       | log2FC    | regulated | nr_annotation                                                                                             |
|-----------------|----------------|----------------|----------------|----------------|----------------|----------------|-----------|-----------|-----------|-----------------------------------------------------------------------------------------------------------|
| c44948.graph_c0 | 2.160422       | 2.2596737      | 2.0596102      | 0.9218692      | 0.5457519      | 0.9167765      | 0.0004831 | -1.394696 | down      | PREDICTED: protein LURP-one-related 15-like isoform X1 [Sesamum indicum]                                  |
| c44954.graph_c0 | 0.675967       | 0.6634074      | 0.8633482      | 1.713676       | 2.8810115      | 4.6407522      | 0.0041643 | 2.097081  | up        | PREDICTED: exonuclease 1 [Sesamum indicum]                                                                |
| c44955.graph_c0 | 0.9287662      | 0.698824       | 0.8525988      | 2.0357126      | 2.3644548      | 1.8768358      | 0.0003144 | 1.380389  | up        | PREDICTED: LOW QUALITY PROTEIN: serine carboxypeptidase 24-like [Sesamum indicum]                         |
| c44970.graph_c0 | 1.978412       | 1.3524998      | 1.0608704      | 4.6931365      | 4.9338564      | 6.0566846      | 6.257E-09 | 1.876156  | up        | PREDICTED: uncharacterized protein LOC105168255 [Sesamum indicum]                                         |
| c44970.graph_c1 | 2.7395407      | 1.0011982      | 2.0225435      | 8.5987438      | 7.6203019      | 9.2696147      | 4.051E-09 | 2.186831  | up        | unnamed protein product [Coffea canephora]                                                                |
| c44971.graph_c0 | 0.034069       | 0.2768497      | 0.1668         | 0.8205135      | 1.0522313      | 1.3833246      | 3.096E-09 | 2.80517   | up        | PREDICTED: probable transcription factor GLK1 [Sesamum indicum]                                           |
| c44979.graph_c0 | 0.8773089      | 0.4916655      | 0.7652477      | 2.9143476      | 1.7874409      | 1.9789974      | 0.0003862 | 1.697084  | up        | hypothetical protein MIMGU_mgv1a001060mg [Erythranthe guttata]                                            |
| c44994.graph_c0 | 1.2542832      | 1.7132694      | 0.9972416      | 0.0407666      | 0.5830277      | 0.253917       | 0.0001031 | -2.159566 | down      | PREDICTED: G-type lectin S-receptor-like serine/threonine-protein kinase RLK1 isoform X1 [Vitis vinifera] |
| c45019.graph_c0 | 17.2963        | 19.223579      | 15.47844       | 3.1926221      | 3.6992768      | 3.3290343      | 6.009E-36 | -2.30644  | down      | BnaAnng27240D [Brassica napus]                                                                            |
| c45027.graph_c0 | 11.999501      | 12.516104      | 8.3962693      | 0.3096234      | 0.5740149      | 0.4821269      | 3.655E-27 | -4.557812 | down      | PREDICTED: uncharacterized protein LOC101264598 [Solanum lycopersicum]                                    |
| c45028.graph_c0 | 3.4595879      | 2.1800708      | 2.8229955      | 7.1260841      | 8.6622483      | 9.7143492      | 2.745E-08 | 1.628624  | up        | hypothetical protein MIMGU_mgv1a010001mg [Erythranthe guttata]                                            |
| c45035.graph_c0 | 0.9515117      | 0.3995934      | 0.5597488      | 1.150013       | 2.4365986      | 2.7204131      | 0.0026507 | 1.751235  | up        | PREDICTED: protein NK11/P1K FAMILY 4.5-like [Sesamum indicum]                                             |
| c45078.graph_c0 | 28.174122      | 31.27613       | 37.213546      | 3.5854071      | 2.7504961      | 3.1745581      | 9.558E-39 | -3.299532 | down      | PREDICTED: uncharacterized protein LOC105174597 [Sesamum indicum]                                         |
| c45088.graph_c0 | 2.0363264      | 3.0643531      | 2.252426       | 4.2446297      | 5.651221       | 5.3079998      | 0.0037667 | 1.085763  | up        | PREDICTED: uncharacterized protein LOC104801838 isoform X2 [Tarenaya hassleriana]                         |
| c45134.graph_c0 | 6.9393839      | 6.980907       | 6.5053065      | 9.4698761      | 14.233584      | 16.286958      | 0.0005251 | 1.003119  | up        | PREDICTED: filament-like plant protein [Sesamum indicum]                                                  |
| c45137.graph_c0 | 1.9783724      | 2.9090923      | 2.4906894      | 3.8690733      | 5.7687012      | 8.5429421      | 0.0090749 | 1.333279  | up        | PREDICTED: receptor-like protein kinase HAIKU2 [Sesamum indicum]                                          |
| c45137.graph_c2 | 6.0220605      | 6.3765356      | 6.7306254      | 10.224137      | 14.090405      | 16.342344      | 1.005E-05 | 1.122669  | up        | PREDICTED: receptor-like protein kinase HAIKU2 [Sesamum indicum]                                          |
| c45143.graph_c0 | 1.4087933      | 2.464516       | 2.1554322      | 8.4823091      | 9.1633327      | 6.6537238      | 1.61E-09  | 2.054345  | up        | PREDICTED: serine/threonine-protein kinase Nek6-like [Sesamum indicum]                                    |
| c45149.graph_c1 | 0.9780677      | 1.0793487      | 1.3301588      | 0.1836701      | 0.0972881      | 0.4085713      | 2.458E-06 | -2.259098 | down      | PREDICTED: protein FAR1-RELATED SEQUENCE 5-like [Nicotiana glauca]                                        |
| c45149.graph_c2 | 358.145        | 370.43944      | 358.82891      | 142.02087      | 178.24212      | 181.22241      | 1.099E-10 | -1.078872 | down      | PREDICTED: carbonic anhydrase 2-like [Sesamum indicum]                                                    |
| c45158.graph_c0 | 0.755418       | 0.8261713      | 0.5990511      | 4.9360923      | 5.3149157      | 5.7841386      | 2.831E-34 | 2.918921  | up        | PREDICTED: uncharacterized protein LOC105177021 [Sesamum indicum]                                         |
| c45180.graph_c0 | 45.549878      | 36.802451      | 37.776689      | 89.325335      | 81.230392      | 77.269497      | 1.485E-12 | 1.089215  | up        | PREDICTED: pentatricopeptide repeat-containing protein At5g24830 isoform X1 [Sesamum indicum]             |
| c45189.graph_c1 | 3.0315148      | 3.3454345      | 1.9239822      | 5.5505209      | 6.5585774      | 7.978094       | 0.0022012 | 1.313129  | up        | hypothetical protein JCGZ_03401 [Jatropha curcas]                                                         |
| c45190.graph_c0 | 51.384333      | 45.658134      | 50.95073       | 236.05324      | 323.07988      | 343.68064      | 4.674E-25 | 2.644548  | up        | PREDICTED: beta-glucosidase 24-like [Eucalyptus grandis]                                                  |
| c45193.graph_c0 | 0.1434635      | 0              | 0.0668943      | 0.9871885      | 1.1558914      | 2.1959859      | 1.319E-06 | 4.398679  | up        | PREDICTED: cellulose synthase-like protein G2 [Sesamum indicum]                                           |

| #ID             | 28 h-1<br>FPKM | 28 h-2<br>FPKM | 28 h-3<br>FPKM | 48 h-1<br>FPKM | 48 h-2<br>FPKM | 48 h-3<br>FPKM | FDR       | log2FC    | regulated | nr_annotation                                                                               |
|-----------------|----------------|----------------|----------------|----------------|----------------|----------------|-----------|-----------|-----------|---------------------------------------------------------------------------------------------|
| c45210.graph_c1 | 5.0150308      | 9.3415899      | 7.4107085      | 32.398929      | 31.57805       | 29.612656      | 4.659E-43 | 2.147774  | up        | PREDICTED: pleiotropic drug resistance protein T-like [Sesamum indicum]                     |
| c45215.graph_c1 | 26.918262      | 27.526309      | 25.905797      | 71.775859      | 52.593568      | 42.920314      | 0.005831  | 1.10849   | up        | PREDICTED: U-box domain-containing protein 13 [Sesamum indicum]                             |
| c45234.graph_c0 | 8.7676519      | 9.0246591      | 9.205241       | 3.9515181      | 3.3750869      | 3.4720866      | 6.356E-09 | -1.276939 | down      | -                                                                                           |
| c45240.graph_c0 | 69.09979       | 72.146644      | 69.165753      | 33.736907      | 34.395953      | 29.221935      | 8.842E-14 | -1.068709 | down      | PREDICTED: crt homolog 1 [Sesamum indicum]                                                  |
| c45242.graph_c0 | 1.4364414      | 1.5748945      | 1.4023632      | 6.5353545      | 7.7500922      | 8.4767657      | 5.514E-17 | 2.404916  | up        | PREDICTED: serine/threonine-protein kinase TIO isoform X2 [Sesamum indicum]                 |
| c45246.graph_c0 | 7.4880083      | 5.9603283      | 6.2709472      | 19.774171      | 24.167765      | 28.077817      | 5.564E-19 | 1.905842  | up        | PREDICTED: WALL-related protein At5g40240-like [Sesamum indicum]                            |
| c45258.graph_c0 | 411.87866      | 440.61131      | 405.96126      | 1129.5795      | 1120.5769      | 1065.0884      | 1.649E-15 | 1.440336  | up        | ascorbate peroxidase [Acanthus ebracteatus]                                                 |
| c45271.graph_c0 | 15.046638      | 18.495389      | 15.681718      | 4.6265514      | 8.2521387      | 10.459722      | 7.781E-05 | -1.045947 | down      | PREDICTED: dof zinc finger protein DOF5.4-like [Sesamum indicum]                            |
| c45279.graph_c0 | 25.71237       | 25.097708      | 25.909643      | 76.10267       | 99.041991      | 97.003997      | 8.346E-35 | 1.864004  | up        | PREDICTED: peroxidase 7 [Sesamum indicum]                                                   |
| c45285.graph_c0 | 3.7732624      | 4.8230242      | 3.7652236      | 0.6915019      | 1.0072733      | 0.8716668      | 1.977E-10 | -2.229143 | down      | PREDICTED: U-box domain-containing protein 19-like [Sesamum indicum]                        |
| c45292.graph_c0 | 47.321518      | 41.405444      | 40.977585      | 94.149375      | 134.33762      | 123.01231      | 6.327E-14 | 1.474512  | up        | PREDICTED: pentatricopeptide repeat-containing protein At5g59600 [Sesamum indicum]          |
| c45303.graph_c0 | 39.774392      | 38.807822      | 36.128846      | 284.52368      | 369.48589      | 346.64468      | 2.604E-79 | 3.162683  | up        | PREDICTED: S-type anion channel SLAH2 [Sesamum indicum]                                     |
| c45320.graph_c1 | 1.0321709      | 1.208088       | 1.0606024      | 4.021973       | 4.1067882      | 4.6135402      | 2.597E-07 | 1.989638  | up        | PREDICTED: laccase-17-like [Sesamum indicum]                                                |
| c45321.graph_c1 | 66.549042      | 66.185585      | 68.192665      | 141.90872      | 155.13812      | 152.96624      | 1.649E-15 | 1.203765  | up        | PREDICTED: UDP-glucuronate 4-epimerase 1 [Sesamum indicum]                                  |
| c45334.graph_c0 | 347.16208      | 344.07339      | 373.83317      | 113.94111      | 96.596545      | 83.583105      | 8.517E-31 | -1.809831 | down      | hypothetical protein MIMGU_mgv1a010052mg [Erythranthe guttata]                              |
| c45340.graph_c0 | 12.647523      | 11.753042      | 12.852119      | 4.5885028      | 3.9086105      | 4.1828097      | 6.076E-18 | -1.510183 | down      | PREDICTED: B3 domain-containing transcription repressor VAL1 [Populus euphratica]           |
| c45351.graph_c2 | 2.3656805      | 1.5738857      | 1.8287773      | 0.4997791      | 0.5015892      | 0.4681057      | 3.39E-06  | -1.930375 | down      | PREDICTED: potassium channel KAT3-like [Sesamum indicum]                                    |
| c45353.graph_c0 | 11.908365      | 12.527719      | 13.193899      | 7.5473649      | 4.3278492      | 3.3886054      | 1.794E-05 | -1.245689 | down      | PREDICTED: protein ZINC INDUCED FACILITATOR-LIKE 1-like isoform X2 [Pyrus x bretschneideri] |
| c45354.graph_c0 | 5.2655832      | 4.2078535      | 5.2844138      | 1.380934       | 1.8693022      | 1.5700654      | 0.000157  | -1.576901 | down      | PREDICTED: protein Brevis radix-like 4 [Sesamum indicum]                                    |
| c45357.graph_c0 | 0.9325644      | 1.4434598      | 1.0327381      | 3.5462821      | 2.5045706      | 2.7046804      | 0.0014615 | 1.410104  | up        | PREDICTED: two-component response regulator-like APRR9 [Sesamum indicum]                    |
| c45364.graph_c0 | 1.1722043      | 1.1568455      | 1.7573075      | 2.7298271      | 2.8187076      | 4.3352748      | 0.0004178 | 1.311119  | up        | PREDICTED: maf-like protein DDB_G0281937 [Sesamum indicum]                                  |
| c45402.graph_c0 | 1.2938733      | 0.8836735      | 0.9745755      | 1.9554797      | 2.0938688      | 3.049632       | 0.0003315 | 1.208678  | up        | PREDICTED: cellulose synthase-like protein E1 [Sesamum indicum]                             |
| c45406.graph_c0 | 296.21273      | 323.01789      | 336.27776      | 28.258609      | 30.399166      | 29.39057       | 1.651E-95 | -3.398986 | down      | 15.5 kDa oleosin [Sesamum indicum]                                                          |
| c45434.graph_c1 | 3.1818256      | 3.7450176      | 3.7090625      | 0.7922354      | 1.0681711      | 2.0506946      | 0.0016123 | -1.41189  | down      | -                                                                                           |
| c45435.graph_c0 | 4.3427113      | 4.8748327      | 5.1717653      | 0.5951034      | 0.5516349      | 0.7280892      | 1.901E-10 | -2.899211 | down      | -                                                                                           |
| c45449.graph_c3 | 33.38744       | 37.135019      | 32.922345      | 9.6139129      | 19.057079      | 20.504108      | 2.865E-06 | -1.042723 | down      | hypothetical protein MIMGU_mgv1a015476mg [Erythranthe guttata]                              |
| c45455.graph_c1 | 1.5546667      | 1.5160158      | 1.1163639      | 0.2364785      | 0.5845475      | 0.7364602      | 0.0026903 | -1.399941 | down      | -                                                                                           |

| #ID             | 28 h-1<br>FPKM | 28 h-2<br>FPKM | 28 h-3<br>FPKM | 48 h-1<br>FPKM | 48 h-2<br>FPKM | 48 h-3<br>FPKM | FDR       | log2FC    | regulated | nr_annotation                                                                                     |
|-----------------|----------------|----------------|----------------|----------------|----------------|----------------|-----------|-----------|-----------|---------------------------------------------------------------------------------------------------|
| c45458.graph_c0 | 53.156982      | 54.380344      | 57.241955      | 19.491371      | 20.287015      | 22.103219      | 2.678E-21 | -1.372427 | down      | PREDICTED: DUF21 domain-containing protein At2g14520-like [Sesamum indicum]                       |
| c45467.graph_c1 | 6.5177134      | 5.8216058      | 7.1483883      | 30.470504      | 30.303489      | 34.305576      | 2.208E-22 | 2.327387  | up        | hypothetical protein MIMGU_mgv1a008026mg [Erythranthe guttata]                                    |
| c45474.graph_c0 | 0.0498338      | 0.0899905      | 0              | 1.6423692      | 2.1414043      | 3.9344582      | 1.454E-07 | 5.822061  | up        | -                                                                                                 |
| c45482.graph_c0 | 0.2222579      | 0.3511865      | 0.3400511      | 2.2538256      | 2.3503478      | 2.7574806      | 2.51E-12  | 3.0505    | up        | PREDICTED: myosin-12 [Sesamum indicum]                                                            |
| c45492.graph_c0 | 45.942803      | 42.216048      | 45.858851      | 145.85491      | 137.64329      | 173.13098      | 2.775E-28 | 1.809663  | up        | PREDICTED: VIN3-like protein 2 [Sesamum indicum]                                                  |
| c45515.graph_c0 | 6.0068274      | 6.3533623      | 6.6584313      | 14.812878      | 15.147717      | 14.324237      | 1.798E-14 | 1.261486  | up        | PREDICTED: V-type proton ATPase subunit a3-like [Sesamum indicum]                                 |
| c45516.graph_c0 | 8.5884851      | 8.7319589      | 8.9257823      | 2.7261479      | 4.0547079      | 4.4016194      | 1.106E-09 | -1.196639 | down      | unnamed protein product [Coffea canephora]                                                        |
| c45518.graph_c0 | 77.797476      | 81.61141       | 82.092186      | 33.568392      | 30.703493      | 29.085505      | 1.833E-20 | -1.326801 | down      | PREDICTED: Fanconi anemia group 1 protein homolog [Sesamum indicum]                               |
| c45537.graph_c2 | 86.905378      | 90.77511       | 90.389742      | 169.9167       | 187.81147      | 206.42252      | 1.721E-13 | 1.112875  | up        | PREDICTED: UDP-glucose 6-dehydrogenase 4 [Sesamum indicum]                                        |
| c45541.graph_c0 | 49.117374      | 41.493775      | 48.717173      | 205.09982      | 255.33622      | 243.43491      | 1.077E-54 | 2.374918  | up        | PREDICTED: WAT1-related protein At1g09380 [Sesamum indicum]                                       |
| c45569.graph_c2 | 5.5429668      | 7.9145348      | 5.1541341      | 2.2875735      | 1.7310048      | 2.1808598      | 0.0006211 | -1.539695 | down      | PREDICTED: heat stress transcription factor C-1-like [Sesamum indicum]                            |
| c45569.graph_c3 | 67.124129      | 65.036294      | 65.511248      | 336.39086      | 328.655        | 318.59686      | 1.579E-53 | 2.357893  | up        | PREDICTED: putative glycerol-3-phosphate transporter 1 [Eucalyptus grandis]                       |
| c45591.graph_c0 | 0.3533374      | 0.7018671      | 0.8072971      | 2.8664392      | 4.1753865      | 1.9926096      | 0.0001936 | 2.31764   | up        | hypothetical protein H632_c597p1 [Helicospodium sp. ATCC 50920]                                   |
| c45616.graph_c0 | 0.3025919      | 0.3512728      | 0.5996448      | 1.0958788      | 1.3350933      | 1.0238616      | 0.0009133 | 1.501974  | up        | PREDICTED: Ia-related protein bC-like isoform X1 [Sesamum indicum]                                |
| c45622.graph_c0 | 1.2569193      | 1.1084877      | 1.5503799      | 2.1860705      | 2.4336331      | 3.2309311      | 0.0079922 | 1.040571  | up        | PREDICTED: LOW QUALITY PROTEIN: beta-adaptin-like protein A [Sesamum indicum]                     |
| c45633.graph_c0 | 0.2270084      | 0.1024836      | 0.5094017      | 2.5897485      | 2.2862704      | 2.0483046      | 1.659E-10 | 3.088289  | up        | -                                                                                                 |
| c45635.graph_c0 | 1.6373724      | 1.6590863      | 1.3212371      | 2.9287471      | 4.2264478      | 4.0013103      | 1.717E-05 | 1.30877   | up        | PREDICTED: laccase-17-like [Sesamum indicum]                                                      |
| c45661.graph_c0 | 3.5369463      | 3.3870782      | 3.4733383      | 10.305859      | 9.9308877      | 12.019555      | 1.8E-19   | 1.674479  | up        | PREDICTED: chaperonin 60 subunit beta 4, chloroplastic isoform X1 [Sesamum indicum]               |
| c45669.graph_c0 | 8.0659359      | 7.9330324      | 7.5454923      | 3.1402801      | 3.9843586      | 3.1516003      | 2.938E-05 | -1.156619 | down      | PREDICTED: uncharacterized protein LOC105168837 isoform X1 [Sesamum indicum]                      |
| c45673.graph_c0 | 3.7021026      | 3.4237839      | 7.2882529      | 46.243476      | 26.763151      | 18.749325      | 0.0028001 | 2.725857  | up        | PREDICTED: probable galactinol--sucrose galactosyltransferase 2-like isoform X1 [Citrus sinensis] |
| c45673.graph_c1 | 1.3409717      | 2.3114733      | 2.3873934      | 12.825616      | 11.459072      | 15.26204       | 1.816E-11 | 2.75255   | up        | hypothetical protein MIMGU_mgv1a001872mg [Erythranthe guttata]                                    |
| c45676.graph_c0 | 23.73304       | 24.640672      | 24.980826      | 6.8461074      | 8.7868289      | 7.4973849      | 8.563E-22 | -1.626522 | down      | PREDICTED: GABA transporter 1 [Sesamum indicum]                                                   |
| c45690.graph_c0 | 3.8700075      | 4.238931       | 4.7238996      | 10.534804      | 8.9666153      | 6.3326855      | 0.0047361 | 1.0576    | up        | PREDICTED: U-box domain-containing protein 35 [Sesamum indicum]                                   |
| c45696.graph_c0 | 414.33563      | 517.71227      | 357.60014      | 1868.6563      | 1392.4908      | 1050.7956      | 0.0002468 | 1.792691  | up        | PREDICTED: nitrate reductase [NADH] 2 [Sesamum indicum]                                           |
| c45700.graph_c0 | 6.6479986      | 7.1013413      | 7.0254474      | 18.212079      | 15.781147      | 16.450839      | 1.328E-15 | 1.324515  | up        | hypothetical protein MIMGU_mgv1a010620mg [Erythranthe guttata]                                    |
| c45745.graph_c0 | 376.01194      | 340.07362      | 393.40551      | 90.080241      | 94.78204       | 86.26224       | 2.513E-30 | -1.991179 | down      | PREDICTED: alpha-galactosidase [Sesamum indicum]                                                  |

| #ID             | 28 h-1<br>FPKM | 28 h-2<br>FPKM | 28 h-3<br>FPKM | 48 h-1<br>FPKM | 48 h-2<br>FPKM | 48 h-3<br>FPKM | FDR       | log2FC    | regulated | nr_annotation                                                                                          |
|-----------------|----------------|----------------|----------------|----------------|----------------|----------------|-----------|-----------|-----------|--------------------------------------------------------------------------------------------------------|
| c45751.graph_c0 | 5.0342242      | 5.2021089      | 4.3211621      | 1.6133183      | 2.0600941      | 2.3327215      | 9.665E-08 | -1.240401 | down      | hypothetical protein MIMGU_mgv1a003838mg [Erythranthe guttata]                                         |
| c45753.graph_c0 | 2.6205732      | 2.3661319      | 2.7756278      | 7.0835086      | 7.8536892      | 7.0466795      | 3.017E-11 | 1.542639  | up        | PREDICTED: phosphatidylinositol/phosphatidylcholine transfer protein SFH9 isoform X1 [Sesamum indicum] |
| c45758.graph_c0 | 1.5777153      | 1.6436873      | 1.6552321      | 0.5494149      | 0.6984462      | 0.9581775      | 0.0067785 | -1.109378 | down      | PREDICTED: pentatricopeptide repeat-containing protein At1g74630 [Sesamum indicum]                     |
| c45770.graph_c0 | 40.849433      | 44.440318      | 44.301029      | 13.016173      | 16.573708      | 17.471196      | 1.212E-21 | -1.424205 | down      | unnamed protein product [Coffea canephora]                                                             |
| c45783.graph_c0 | 6.1823084      | 5.7220334      | 6.6103138      | 2.2354995      | 2.9147577      | 2.273296       | 8.943E-07 | -1.279773 | down      | PREDICTED: uncharacterized protein LOC105166430 [Sesamum indicum]                                      |
| c45800.graph_c0 | 306.41452      | 325.10515      | 317.75506      | 121.4477       | 113.58558      | 99.664594      | 1.934E-19 | -1.459323 | down      | PREDICTED: uncharacterized protein LOC105158790 isoform X1 [Sesamum indicum]                           |
| c45801.graph_c0 | 60.617379      | 58.773623      | 62.783009      | 27.865156      | 28.773145      | 25.887639      | 2.98E-14  | -1.100112 | down      | PREDICTED: protein CPR-5 [Sesamum indicum]                                                             |
| c45804.graph_c1 | 0.4761743      | 0.7255249      | 0.6556854      | 3.8101362      | 3.6767002      | 2.5175022      | 9.256E-10 | 2.475356  | up        | hypothetical protein CICLE_v10021726mg [Citrus clementina]                                             |
| c45809.graph_c0 | 0.3753529      | 0.3389085      | 0.8422835      | 2.4384106      | 2.4571906      | 4.0218516      | 7.173E-07 | 2.554084  | up        | PREDICTED: uncharacterized protein LOC105176285 [Sesamum indicum]                                      |
| c45815.graph_c1 | 466.37755      | 414.50447      | 389.03515      | 72.9643        | 104.07088      | 75.39222       | 7.106E-42 | -2.292902 | down      | hypothetical protein MIMGU_mgv1a010438mg [Erythranthe guttata]                                         |
| c45827.graph_c1 | 17.747762      | 17.930399      | 16.48561       | 38.222371      | 36.037851      | 40.520528      | 7.88E-13  | 1.180161  | up        | unnamed protein product [Coffea canephora]                                                             |
| c45833.graph_c0 | 2.255838       | 6.5992651      | 5.1540871      | 25.391835      | 42.772739      | 14.044609      | 0.0054871 | 2.592     | up        | 60S ribosomal protein L35a-4 [Auxenochlorella protothecoides]                                          |
| c45850.graph_c0 | 74.088984      | 88.513312      | 86.143478      | 18.096987      | 21.314968      | 22.503619      | 2.896E-39 | -1.967712 | down      | PREDICTED: uncharacterized protein LOC105163078 [Sesamum indicum]                                      |
| c45851.graph_c0 | 2.0492797      | 1.9329105      | 2.4635023      | 0.2783157      | 0.6142536      | 0.5159242      | 5.069E-08 | -2.164846 | down      | -                                                                                                      |
| c45858.graph_c0 | 0.0966789      | 0.0698336      | 0.0315557      | 1.1029289      | 0.4673678      | 1.0904216      | 8.882E-06 | 3.799012  | up        | PREDICTED: putative ABC transporter B family member 8 [Sesamum indicum]                                |
| c45862.graph_c0 | 24.846578      | 25.173383      | 28.254923      | 9.2651053      | 10.348133      | 8.0996561      | 6.927E-24 | -1.45627  | down      | PREDICTED: uncharacterized protein LOC105160721 [Sesamum indicum]                                      |
| c45865.graph_c0 | 1.3607858      | 1.2100459      | 1.0262696      | 2.3521312      | 2.8240375      | 3.6742236      | 8.701E-05 | 1.335666  | up        | PREDICTED: type I inositol 1,4,5-trisphosphate 5-phosphatase CVP2-like [Sesamum indicum]               |
| c45870.graph_c0 | 1.7476133      | 1.8887356      | 1.3612183      | 2.3494849      | 4.017948       | 5.1965287      | 0.0078817 | 1.241775  | up        | PREDICTED: kinesin-4-like isoform X2 [Sesamum indicum]                                                 |
| c45871.graph_c0 | 2.1621735      | 1.342165       | 1.3967501      | 0.799375       | 0.6048863      | 0.3048339      | 0.0021215 | -1.466469 | down      | PREDICTED: pentatricopeptide repeat-containing protein At2g03880, mitochondrial [Sesamum indicum]      |
| c45873.graph_c0 | 13.053669      | 12.096403      | 13.05766       | 4.6083417      | 6.9577814      | 6.5381585      | 5.592E-10 | -1.042624 | down      | hypothetical protein PHAVU_004G031700g [Phaseolus vulgaris]                                            |
| c45903.graph_c0 | 21.131917      | 24.347525      | 25.170566      | 40.401553      | 50.9034        | 51.141984      | 6.458E-13 | 1.049306  | up        | PREDICTED: probable xyloglucan glycosyltransferase 12 [Sesamum indicum]                                |
| c45908.graph_c0 | 3.2049961      | 2.543046       | 2.5360006      | 5.8476366      | 9.3248974      | 11.501793      | 5.827E-05 | 1.719343  | up        | PREDICTED: chlorophyll a-b binding protein CP24 10A, chloroplastic [Cucumis melo]                      |
| c45914.graph_c0 | 0.3337468      | 0.3390098      | 0.2382928      | 1.9566001      | 1.4565485      | 1.7880243      | 1.74E-08  | 2.559991  | up        | PREDICTED: separase [Sesamum indicum]                                                                  |
| c45916.graph_c0 | 324.80061      | 373.7312       | 344.78003      | 52.361465      | 59.254601      | 61.224795      | 5.473E-59 | -2.554049 | down      | PREDICTED: translocator protein homolog [Sesamum indicum]                                              |
| c45929.graph_c0 | 0.2632634      | 0.2925565      | 0.1487221      | 0.7187508      | 0.843011       | 0.6852216      | 9.541E-05 | 1.714954  | up        | hypothetical protein JCGZ_06305 [Jatropha curcas]                                                      |

| #ID             | 28 h-1<br>FPKM | 28 h-2<br>FPKM | 28 h-3<br>FPKM | 48 h-1<br>FPKM | 48 h-2<br>FPKM | 48 h-3<br>FPKM | FDR       | log2FC    | regulated | nr_annotation                                                                                            |
|-----------------|----------------|----------------|----------------|----------------|----------------|----------------|-----------|-----------|-----------|----------------------------------------------------------------------------------------------------------|
| c45931.graph_c0 | 16.8045        | 19.613734      | 19.397937      | 109.72583      | 81.897216      | 65.181377      | 2.608E-06 | 2.252148  | up        | PREDICTED: uncharacterized protein LOC105168927 [Sesamum indicum]                                        |
| c45932.graph_c0 | 31.707067      | 31.758624      | 34.31561       | 13.791376      | 12.569147      | 12.752718      | 1.561E-16 | -1.278165 | down      | PREDICTED: uncharacterized protein LOC105174716 [Sesamum indicum]                                        |
| c45960.graph_c0 | 14.22521       | 14.310244      | 14.390312      | 5.7634935      | 5.7277492      | 4.4811765      | 1.126E-19 | -1.381976 | down      | PREDICTED: F-box/LKK-repeat protein 5 isoform X1 [Sesamum indicum]                                       |
| c45964.graph_c2 | 499.13478      | 516.30857      | 514.44255      | 1844.5511      | 1529.6716      | 1630.78        | 3.418E-21 | 1.755294  | up        | hypothetical protein MIMGU_mgv1a027154mg [Erythranthe guttata]                                           |
| c45974.graph_c2 | 47.214864      | 48.768508      | 44.466233      | 99.990906      | 95.67474       | 93.137964      | 1.015E-12 | 1.083446  | up        | PREDICTED: EIN3-binding F-box protein 1-like [Sesamum indicum]                                           |
| c45984.graph_c0 | 4.7045694      | 4.6429278      | 4.5382229      | 1.6642014      | 2.4486382      | 2.5913936      | 0.0004395 | -1.015785 | down      | PREDICTED: uncharacterized protein LOC105157708 [Sesamum indicum]                                        |
| c45985.graph_c0 | 10.450097      | 9.7990261      | 10.655081      | 4.2776939      | 5.1625309      | 4.9849112      | 2.632E-11 | -1.060534 | down      | PREDICTED: uncharacterized protein LOC105175876 isoform X1 [Sesamum indicum]                             |
| c45987.graph_c0 | 12.121522      | 12.3834        | 11.235196      | 40.261997      | 48.278822      | 53.616158      | 8.992E-35 | 2.02985   | up        | hypothetical protein MIMGU_mgv1a004935mg [Erythranthe guttata]                                           |
| c45989.graph_c0 | 2.464604       | 2.8919593      | 2.4862926      | 1.0545374      | 1.4104076      | 1.3253785      | 0.0004127 | -1.011664 | down      | PREDICTED: pentatricopeptide repeat-containing protein At4g21300 [Sesamum indicum]                       |
| c45999.graph_c0 | 1.1869022      | 0.968617       | 0.9498775      | 5.1789036      | 9.0112157      | 8.0063515      | 1.586E-12 | 2.870587  | up        | PREDICTED: heparanase-like protein 1 isoform X1 [Sesamum indicum]                                        |
| c46015.graph_c0 | 10.221182      | 11.441344      | 10.18213       | 1.9209361      | 3.0741472      | 3.091174       | 1.544E-12 | -1.943711 | down      | PREDICTED: cytochrome P450 724B1 isoform X1 [Vitis vinifera]                                             |
| c46019.graph_c2 | 85.551844      | 80.430893      | 84.144798      | 163.65186      | 178.72788      | 171.52333      | 1.131E-12 | 1.079528  | up        | PREDICTED: protein ACCUMULATION AND REPLICATION OF CHLOROPLASTS 3 [Sesamum indicum]                      |
| c46047.graph_c0 | 16.66006       | 15.016174      | 17.111924      | 7.9376544      | 7.9787553      | 7.3913831      | 1.983E-07 | -1.023238 | down      | PREDICTED: histone-lysine N-methyltransferase ATXR2 [Sesamum indicum]                                    |
| c46056.graph_c2 | 47.494417      | 56.116665      | 46.374376      | 191.29587      | 139.91671      | 119.95214      | 6.924E-05 | 1.639166  | up        | PREDICTED: cytochrome P450 93A3-like [Sesamum indicum]                                                   |
| c46064.graph_c0 | 33.29855       | 36.563381      | 38.033798      | 9.1223006      | 8.1117272      | 9.3786731      | 3.608E-30 | -1.976373 | down      | hypothetical protein M569_12324 [Genlisea aurea]                                                         |
| c46073.graph_c0 | 146.12736      | 146.06343      | 162.39793      | 75.679475      | 70.373145      | 54.145119      | 1.279E-13 | -1.137512 | down      | PREDICTED: RING finger and CHY zinc finger domain-containing protein 1-like isoform X1 [Sesamum indicum] |
| c46079.graph_c0 | 10.692174      | 11.979597      | 10.914739      | 54.596569      | 58.303477      | 76.409275      | 4.886E-22 | 2.533439  | up        | PREDICTED: probable beta-D-xylosidase 7 [Sesamum indicum]                                                |
| c46085.graph_c0 | 0.1813873      | 0.4585721      | 0.6216444      | 7.0356069      | 6.5277902      | 8.5515707      | 2.385E-27 | 4.172073  | up        | PREDICTED: thylakoid lumenal 29 kDa protein, chloroplastic [Sesamum indicum]                             |
| c46087.graph_c1 | 108.8986       | 110.28176      | 123.25679      | 58.136254      | 49.662364      | 42.429093      | 2.313E-14 | -1.142159 | down      | PREDICTED: SUMO-activating enzyme subunit 2 [Sesamum indicum]                                            |
| c46088.graph_c0 | 0.249008       | 0.3747182      | 0.2031885      | 3.7876322      | 2.1177279      | 4.2127654      | 6.536E-08 | 3.660631  | up        | PREDICTED: protein TIC 62, chloroplastic [Beta vulgaris subsp. vulgaris]                                 |
| c46092.graph_c0 | 1.3642021      | 1.1723853      | 1.1534131      | 0.354179       | 0.4634943      | 0.4634504      | 0.0004875 | -1.489091 | down      | hypothetical protein M569_17037, partial [Genlisea aurea]                                                |
| c46111.graph_c1 | 0.1419126      | 0.1281337      | 0.1157995      | 9.3539999      | 7.6226374      | 11.524338      | 2.637E-23 | 6.249218  | up        | -                                                                                                        |
| c46114.graph_c0 | 3.2968914      | 4.048426       | 5.165254       | 18.889318      | 29.485149      | 17.476931      | 1.882E-07 | 2.432901  | up        | 40S ribosomal protein S17 [Auxenochlorella protothecoides]                                               |
| c46130.graph_c0 | 16.437594      | 16.302477      | 16.206508      | 37.213263      | 32.873442      | 25.57463       | 0.0002006 | 1.013541  | up        | PREDICTED: GATA transcription factor 5-like [Sesamum indicum]                                            |
| c46137.graph_c0 | 3.5692166      | 3.7166536      | 3.3588858      | 0.6934974      | 1.3294144      | 1.2929082      | 9.227E-06 | -1.651524 | down      | PREDICTED: uncharacterized protein LOC103331091 [Prunus mume]                                            |
| c46144.graph_c2 | 1.1182533      | 1.475683       | 1.5442063      | 106.85531      | 88.018966      | 121.56556      | 2.322E-64 | 6.29961   | up        | major latex-like protein 1 [Plantago major]                                                              |

| #ID             | 28 h-1<br>FPKM | 28 h-2<br>FPKM | 28 h-3<br>FPKM | 48 h-1<br>FPKM | 48 h-2<br>FPKM | 48 h-3<br>FPKM | FDR       | log2FC    | regulated | nr_annotation                                                                              |
|-----------------|----------------|----------------|----------------|----------------|----------------|----------------|-----------|-----------|-----------|--------------------------------------------------------------------------------------------|
| c46145.graph_c0 | 48.715007      | 45.398941      | 45.960952      | 19.054923      | 22.373238      | 22.465317      | 5.218E-14 | -1.093448 | down      | PREDICTED: serine/threonine-protein kinase GRIK2 [Sesamum indicum]                         |
| c46147.graph_c1 | 2.3072411      | 2.5181809      | 2.1309567      | 15.844251      | 12.427075      | 9.9230169      | 1.207E-08 | 2.506356  | up        | PREDICTED: polyamine oxidase 1 [Sesamum indicum]                                           |
| c46154.graph_c1 | 0.5562353      | 0.3476965      | 0.4887976      | 1.8982632      | 3.0451979      | 2.1716527      | 7.548E-08 | 2.388255  | up        | hypothetical protein MIMGU_mgv1a012700mg [Erythranthe guttata]                             |
| c46159.graph_c0 | 37.840445      | 30.274002      | 43.124264      | 12.952723      | 6.2177083      | 10.444762      | 2.171E-09 | -1.857926 | down      | dehydration responsive protein, partial [Corchorus olitorius]                              |
| c46164.graph_c0 | 25.40581       | 21.576887      | 22.577513      | 10.326613      | 10.696688      | 12.523665      | 1.243E-08 | -1.012059 | down      | PREDICTED: protein Brevis radix-like 1 [Sesamum indicum]                                   |
| c46173.graph_c0 | 28.279539      | 27.637982      | 28.817413      | 9.2030374      | 13.179883      | 10.817313      | 9.863E-12 | -1.314959 | down      | PREDICTED: 1-aminocyclopropane-1-carboxylate oxidase homolog 1-like [Sesamum indicum]      |
| c46178.graph_c0 | 16100.365      | 15688.519      | 18260.994      | 2624.4807      | 2587.16        | 2099.8277      | 1.105E-10 | -2.731226 | down      | PREDICTED: vicinin-like antimicrobial peptides 2-2 [Sesamum indicum]                       |
| c46180.graph_c1 | 0.5568135      | 0.2822458      | 0.3826149      | 0.074295       | 0.104942       | 0.1542501      | 0.0014569 | -1.840666 | down      | PREDICTED: replication protein A 70 kDa DNA-binding subunit A isoform X1 [Sesamum indicum] |
| c46183.graph_c0 | 0.3113759      | 0.4016333      | 0.4476652      | 2.2741774      | 3.7830652      | 4.9668939      | 1.407E-07 | 3.278598  | up        | PREDICTED: uncharacterized protein LOC105179348 isoform X2 [Sesamum indicum]               |
| c46204.graph_c0 | 32.775657      | 31.72984       | 31.493478      | 53.62417       | 69.904703      | 72.383167      | 1.623E-12 | 1.066009  | up        | PREDICTED: probable cinnamyl alcohol dehydrogenase 6 [Sesamum indicum]                     |
| c46205.graph_c0 | 109.53947      | 101.95362      | 113.56659      | 25.458782      | 22.239683      | 20.522945      | 1.088E-51 | -2.206996 | down      | PREDICTED: uncharacterized protein LOC104222596 [Nicotiana glauca]                         |
| c46205.graph_c1 | 183.05057      | 179.20703      | 202.34616      | 50.638219      | 51.377132      | 44.031881      | 8.804E-39 | -1.907868 | down      | PREDICTED: uncharacterized protein LOC102603928 [Solium tuberosum]                         |
| c46208.graph_c0 | 5.3625753      | 5.6305459      | 4.5912935      | 1.8796004      | 2.1548698      | 2.2910372      | 1.369E-05 | -1.261512 | down      | PREDICTED: uncharacterized protein LOC105158293 isoform X2 [Sesamum indicum]               |
| c46216.graph_c0 | 163.78689      | 157.2194       | 146.32452      | 64.392143      | 69.074807      | 65.320032      | 1.161E-15 | -1.191861 | down      | PREDICTED: uncharacterized protein LOC105174095 isoform X1 [Sesamum indicum]               |
| c46216.graph_c1 | 8.4694836      | 7.2262056      | 9.0033595      | 3.1517635      | 3.5475932      | 2.5415058      | 0.0003538 | -1.376286 | down      | -                                                                                          |
| c46231.graph_c0 | 0.7981737      | 0.8708169      | 1.5197076      | 31.532687      | 32.601194      | 23.256296      | 7.548E-36 | 4.819558  | up        | PREDICTED: vestitone reductase-like [Sesamum indicum]                                      |
| c46236.graph_c0 | 109.52874      | 102.49613      | 116.01386      | 19.746808      | 16.376086      | 9.9671098      | 6.611E-79 | -2.781485 | down      | PREDICTED: cytochrome P450 71B36-like [Sesamum indicum]                                    |
| c46238.graph_c0 | 1.1844702      | 1.2205857      | 1.2711813      | 0.652784       | 0.6051023      | 0.348506       | 0.0030006 | -1.146451 | down      | PREDICTED: uncharacterized protein LOC104808395 [Arenaria haeccleriana]                    |
| c46239.graph_c0 | 4.1580851      | 4.1748494      | 3.7594036      | 9.2553126      | 11.368302      | 12.512436      | 1.221E-15 | 1.491944  | up        | PREDICTED: subtilisin-like protease SBT3.5 [Sesamum indicum]                               |
| c46243.graph_c1 | 11.985002      | 13.460033      | 13.079698      | 5.1263217      | 5.1928746      | 5.7266837      | 6.94E-08  | -1.222512 | down      | hypothetical protein MIMGU_mgv1a008659mg [Erythranthe guttata]                             |
| c46259.graph_c0 | 26.692417      | 26.572185      | 25.477676      | 299.72578      | 211.2089       | 184.55256      | 1.433E-09 | 3.193543  | up        | PREDICTED: phosphoglycerate kinase, cytosolic-like [Sesamum indicum]                       |
| c46264.graph_c0 | 26.652345      | 26.006683      | 23.981942      | 8.2290718      | 10.975904      | 10.34368       | 6.173E-18 | -1.337708 | down      | hypothetical protein L484_013876 [Morus notabilis]                                         |
| c46269.graph_c0 | 1.9138183      | 2.172341       | 1.7847544      | 9.6343111      | 8.8112671      | 7.4624374      | 8.956E-10 | 2.187438  | up        | hypothetical protein MIMGU_mgv1a009279mg [Erythranthe guttata]                             |
| c46279.graph_c0 | 1.7618473      | 1.1029428      | 1.6293401      | 3.1563566      | 2.7444208      | 3.0469653      | 0.0038399 | 1.036926  | up        | BnaA04g06750D [Brassica napus]                                                             |
| c46291.graph_c0 | 39.411001      | 32.050318      | 35.09436       | 13.960459      | 16.470512      | 15.281657      | 4.502E-16 | -1.181507 | down      | hypothetical protein MIMGU_mgv1b005497mg [Erythranthe guttata]                             |
| c46294.graph_c0 | 193.30575      | 133.7676       | 170.08392      | 51.047765      | 23.598073      | 14.86538       | 4.222E-12 | -2.411188 | down      | -                                                                                          |
| c46295.graph_c0 | 0.6243704      | 0.6910459      | 0.8874833      | 2.3743065      | 2.8939357      | 3.1803238      | 5.732E-08 | 1.97644   | up        | hypothetical protein MIMGU_mgv1a004572mg [Erythranthe guttata]                             |

| #ID             | 28 h-1<br>FPKM | 28 h-2<br>FPKM | 28 h-3<br>FPKM | 48 h-1<br>FPKM | 48 h-2<br>FPKM | 48 h-3<br>FPKM | FDR       | log2FC    | regulated | nr_annotation                                                                                        |
|-----------------|----------------|----------------|----------------|----------------|----------------|----------------|-----------|-----------|-----------|------------------------------------------------------------------------------------------------------|
| c46306.graph_c0 | 0.7017         | 0.2851062      | 0.3435489      | 7.293543       | 10.97746       | 12.504642      | 5.838E-22 | 4.56553   | up        | unnamed protein product [Coffea canephora]                                                           |
| c46315.graph_c0 | 6.7462567      | 5.9301709      | 5.3063968      | 21.008432      | 19.599117      | 15.949559      | 8.106E-13 | 1.698573  | up        | hypothetical protein MIMGU_mgv1a001332mg [Erythranthe guttata]                                       |
| c46327.graph_c0 | 5.2152651      | 5.7002418      | 5.3568471      | 1.246761       | 2.9794612      | 3.1216886      | 0.0001959 | -1.119334 | down      | PREDICTED: high affinity nitrate transporter 2.4-like [Sesamum indicum]                              |
| c46354.graph_c0 | 7.130237       | 7.8095494      | 8.5765629      | 3.1225684      | 3.6204031      | 3.1952089      | 9.649E-10 | -1.202511 | down      | PREDICTED: uncharacterized protein LOC105172585 [Sesamum indicum]                                    |
| c46354.graph_c1 | 2.4559208      | 3.7318334      | 3.1282128      | 0.8731755      | 1.5282998      | 1.5538926      | 0.0022038 | -1.203492 | down      | PREDICTED: pentatricopeptide repeat-containing protein At4g22760 [Sesamum indicum]                   |
| c46391.graph_c0 | 49.047805      | 52.830403      | 52.381392      | 20.113667      | 19.496174      | 16.246636      | 2.326E-23 | -1.421254 | down      | hypothetical protein MIMGU_mgv1a003239mg [Erythranthe guttata]                                       |
| c46391.graph_c1 | 26.579645      | 24.608424      | 25.865871      | 15.651469      | 10.386627      | 8.24809        | 2.424E-07 | -1.115492 | down      | unnamed protein product [Coffea canephora]                                                           |
| c46400.graph_c0 | 2.3686961      | 2.6733881      | 2.1798103      | 6.2718822      | 6.3262206      | 6.8422737      | 4.392E-12 | 1.470233  | up        | PREDICTED: flavin-containing monooxygenase FMO GS-OX-like 2 isoform X1 [Sesamum indicum]             |
| c46405.graph_c0 | 4.774811       | 5.54298        | 6.0214105      | 2.2008817      | 2.0817565      | 2.4479141      | 0.0023117 | -1.237928 | down      | PREDICTED: uncharacterized protein LOC101504607, partial [Cicer arietinum]                           |
| c46408.graph_c1 | 6.3515939      | 7.4679661      | 5.9802101      | 14.111566      | 12.371995      | 13.461706      | 5.644E-06 | 1.056924  | up        | PREDICTED: phosphoglycerate mutase-like protein 4 [Sesamum indicum]                                  |
| c46427.graph_c0 | 6.12915        | 5.0424126      | 5.4228613      | 1.9113169      | 2.4935141      | 2.4092942      | 1.841E-07 | -1.246804 | down      | PREDICTED: uncharacterized protein LOC105155870 [Sesamum indicum]                                    |
| c46430.graph_c0 | 25.967082      | 22.54552       | 21.799168      | 73.203379      | 91.219007      | 109.84073      | 5.89E-15  | 2.000272  | up        | PREDICTED: baicalein /-O-glucuronosyltransferase-like [Sesamum indicum]                              |
| c46432.graph_c0 | 0.2914201      | 0.52625        | 0.7728383      | 1.9393311      | 2.3479842      | 2.1364635      | 5.9E-06   | 2.052297  | up        | --                                                                                                   |
| c46442.graph_c0 | 14.74257       | 14.815898      | 13.26418       | 4.5824492      | 6.6448795      | 6.1306126      | 5.078E-10 | -1.266741 | down      | PREDICTED: heat stress transcription factor C-1-like [Sesamum indicum]                               |
| c46445.graph_c1 | 43.812963      | 45.524244      | 45.429647      | 20.226132      | 17.328481      | 15.164618      | 4.517E-17 | -1.307607 | down      | PREDICTED: plant intracellular Ras-group-related LRR protein 3-like [Sesamum indicum]                |
| c46486.graph_c0 | 11.724845      | 10.422123      | 10.87202       | 4.0533011      | 5.9871362      | 5.8643951      | 2.856E-09 | -1.018771 | down      | PREDICTED: uncharacterized protein LOC105176969 [Sesamum indicum]                                    |
| c46492.graph_c1 | 13.20491       | 13.099941      | 12.705194      | 4.9105004      | 7.2779096      | 6.3439365      | 1.302E-08 | -1.037887 | down      | PREDICTED: LOW QUALITY PROTEIN: uncharacterized protein LOC105176443 [Sesamum indicum]               |
| c46530.graph_c0 | 2.1783199      | 3.5195701      | 3.2743259      | 17.584362      | 18.166636      | 17.844723      | 1.36E-12  | 2.62032   | up        | PREDICTED: diacylglycerol kinase 3-like [Sesamum indicum]                                            |
| c46530.graph_c1 | 2.2759516      | 3.642903       | 3.9675646      | 20.981355      | 18.337441      | 15.985403      | 9.741E-13 | 2.529721  | up        | PREDICTED: diacylglycerol kinase 3-like [Sesamum indicum]                                            |
| c46530.graph_c2 | 2.4926536      | 3.232452       | 2.8666903      | 8.9699337      | 9.2554457      | 9.2644539      | 1.504E-16 | 1.719572  | up        | PREDICTED: glutamate receptor 2.8-like [Sesamum indicum]                                             |
| c46533.graph_c0 | 23.612969      | 25.210863      | 26.159461      | 12.016166      | 3.4717285      | 1.9439841      | 2.623E-08 | -2.031772 | down      | Cell wall-associated hydrolase, partial [Medicago truncatula]                                        |
| c46533.graph_c1 | 8.4161903      | 10.638643      | 12.361577      | 3.4138051      | 1.8082563      | 0.3796979      | 1.86E-07  | -2.422322 | down      | -                                                                                                    |
| c46544.graph_c0 | 0.2424045      | 0.4085545      | 0.4747202      | 1.2700308      | 1.9096619      | 1.4034688      | 5.22E-07  | 2.061907  | up        | PREDICTED: phosphatidylinositol 4-phosphate 5-kinase 6 [Sesamum indicum]                             |
| c46546.graph_c0 | 4.8850759      | 4.3569757      | 4.083406       | 1.9633784      | 1.6799688      | 2.2173491      | 0.0075754 | -1.142287 | down      | PREDICTED: vacuolar cation/proton exchanger 5-like [Sesamum indicum]                                 |
| c46550.graph_c1 | 4.920315       | 5.928771       | 5.3869477      | 13.326244      | 13.048029      | 12.35667       | 6.027E-13 | 1.297467  | up        | PREDICTED: G-type lectin S-receptor-like serine/threonine-protein kinase At4g27290 [Sesamum indicum] |



| #ID             | 28 h-1<br>FPKM | 28 h-2<br>FPKM | 28 h-3<br>FPKM | 48 h-1<br>FPKM | 48 h-2<br>FPKM | 48 h-3<br>FPKM | FDR       | log2FC    | regulated | nr_annotation                                                                          |
|-----------------|----------------|----------------|----------------|----------------|----------------|----------------|-----------|-----------|-----------|----------------------------------------------------------------------------------------|
| c46550.graph_c2 | 0.6080546      | 0.6519569      | 0.9923352      | 2.4326924      | 4.0826021      | 3.4719247      | 1.416E-09 | 2.181773  | up        | PREDICTED: uncharacterized protein LOC105175473 [Sesamum indicum]                      |
| c46559.graph_c0 | 25.396671      | 19.632546      | 17.032994      | 6.6148257      | 2.3358686      | 1.1771664      | 2.784E-09 | -2.545244 | down      | -                                                                                      |
| c46566.graph_c0 | 0              | 0              | 0.0609157      | 3.5012137      | 5.7140364      | 8.251491       | 4.528E-12 | 8.189238  | up        | -                                                                                      |
| c46577.graph_c0 | 0.5372904      | 0.3880983      | 0.6576369      | 2.383693       | 4.4011216      | 2.3633952      | 5.47E-05  | 2.564779  | up        | -                                                                                      |
| c46579.graph_c0 | 4.1175438      | 7.435512       | 7.97972        | 36.861236      | 52.700234      | 29.170708      | 1.271E-07 | 2.642899  | up        | 60S ribosomal protein L11 [Candida albicans WO-1]                                      |
| c46589.graph_c0 | 1.9214695      | 2.1810257      | 1.6350993      | 5.8106554      | 3.9440616      | 5.0464471      | 1.149E-05 | 1.415347  | up        | PREDICTED: uncharacterized protein LOC105175906 [Sesamum indicum]                      |
| c46590.graph_c0 | 3.3478047      | 3.5162646      | 2.8432826      | 1.5588694      | 1.3761943      | 1.4256024      | 0.0055851 | -1.109846 | down      | PREDICTED: uncharacterized protein LOC104210866 [Nicotiana glauca]                     |
| c46592.graph_c0 | 6.1642483      | 4.7517765      | 5.8451108      | 47.005368      | 55.652974      | 83.347904      | 8.472E-12 | 3.507365  | up        | hypothetical protein MIMGU_mgv1a019962mg [Erythranthe guttata]                         |
| c46603.graph_c1 | 41.435102      | 37.984196      | 42.203715      | 17.177798      | 20.619802      | 16.549263      | 3.944E-11 | -1.12199  | down      | PREDICTED: DEAD-box ATP-dependent RNA helicase 53-like [Sesamum indicum]               |
| c46629.graph_c0 | 4.2897545      | 4.9612366      | 4.7786423      | 1.3441208      | 1.8770026      | 1.6852595      | 4.779E-06 | -1.478992 | down      | Uncharacterized protein TCM_005954 [Theobroma cacao]                                   |
| c46642.graph_c0 | 0.0525316      | 0.0711467      | 0.1393125      | 1.1486379      | 0.9346762      | 1.4516088      | 2.562E-16 | 3.789169  | up        | PREDICTED: condensin-2 complex subunit D3 [Sesamum indicum]                            |
| c46665.graph_c0 | 93.841384      | 89.876026      | 93.127664      | 36.779032      | 39.792492      | 43.60438       | 2.523E-15 | -1.164155 | down      | PREDICTED: uncharacterized protein LOC105173922 isoform X1 [Sesamum indicum]           |
| c46666.graph_c0 | 0.0834899      | 0.3517898      | 0.3179263      | 0.9701043      | 0.6353103      | 0.9259707      | 5.382E-05 | 1.79591   | up        | PREDICTED: Fanconi anemia group J protein [Sesamum indicum]                            |
| c46679.graph_c0 | 5.2198711      | 5.2367269      | 5.2058993      | 27.201459      | 45.526054      | 21.587079      | 5.732E-05 | 2.627367  | up        | RecName: Full=Tubulin beta-1 chain; AltName: Full=Beta-1-tubulin [Cyanophora paradoxa] |
| c46688.graph_c0 | 4.3838432      | 3.5688683      | 4.8086685      | 1.1842455      | 0.8685446      | 1.0537345      | 7.769E-06 | -1.992273 | down      | -                                                                                      |
| c46692.graph_c1 | 38.793443      | 34.943296      | 36.657286      | 74.742618      | 80.516469      | 75.089416      | 2.722E-14 | 1.102355  | up        | PREDICTED: transcription factor SPATULA-like [Sesamum indicum]                         |
| c46698.graph_c0 | 623.12125      | 651.43983      | 662.57237      | 2675.8193      | 2917.8153      | 3528.6468      | 5.787E-24 | 2.274266  | up        | hypothetical protein MIMGU_mgv1a006007mg [Erythranthe guttata]                         |
| c46710.graph_c0 | 108.93387      | 87.382549      | 89.390225      | 183.99363      | 227.56249      | 237.2305       | 4.737E-12 | 1.220969  | up        | PREDICTED: uncharacterized protein LOC105177873 [Sesamum indicum]                      |
| c46714.graph_c0 | 2.1441363      | 3.0611239      | 2.6318735      | 6.5507171      | 7.2842141      | 8.6191662      | 2.783E-11 | 1.55748   | up        | PREDICTED: boron transporter 4-like [Sesamum indicum]                                  |
| c46719.graph_c1 | 0.4070218      | 0              | 0.0369029      | 1.9490694      | 2.6720976      | 2.2953577      | 1.813E-15 | 3.998921  | up        | PREDICTED: G2/mitotic-specific cyclin-2-like [Sesamum indicum]                         |
| c46730.graph_c0 | 16.192597      | 17.82523       | 17.832799      | 8.0130511      | 8.3509859      | 7.3119359      | 1.669E-12 | -1.088517 | down      | PREDICTED: protein-lysine N-methyltransferase EFM1 isoform X1 [Sesamum indicum]        |
| c46737.graph_c0 | 3.485966       | 4.753368       | 5.6890396      | 23.265906      | 35.155991      | 20.862343      | 2.915E-08 | 2.546541  | up        | 60S ribosomal protein L12 [Triticum urartu]                                            |
| c46738.graph_c0 | 40.128174      | 33.943643      | 39.465453      | 20.480023      | 5.9557923      | 6.4316474      | 2.334E-06 | -1.720924 | down      | cell wall-associated hydrolase [Phaseolus vulgaris]                                    |
| c46739.graph_c0 | 0.4085861      | 0.3689149      | 0.5417797      | 2.8485211      | 3.9778281      | 2.7074104      | 2.604E-10 | 2.891194  | up        | predicted protein [Trichoderma reesei QM6a]                                            |
| c46745.graph_c1 | 1.6654854      | 1.694733       | 2.211108       | 9.6341039      | 8.6086782      | 9.958855       | 5.52E-34  | 2.382262  | up        | PREDICTED: chloride channel protein CLC-b-like [Nicotiana glauca]                      |
| c46748.graph_c0 | 151.43461      | 144.16504      | 157.04656      | 67.605068      | 77.091077      | 73.941976      | 9.351E-12 | -1.010039 | down      | hypothetical protein MIMGU_mgv1a023425mg [Erythranthe guttata]                         |
| c46752.graph_c0 | 1.5021164      | 1.5500232      | 1.751021       | 8.2508537      | 9.9574442      | 9.6273937      | 9.248E-23 | 2.57347   | up        | PREDICTED: pollen-specific protein SF21-like [Sesamum indicum]                         |

| #ID             | 28 h-1<br>FPKM | 28 h-2<br>FPKM | 28 h-3<br>FPKM | 48 h-1<br>FPKM | 48 h-2<br>FPKM | 48 h-3<br>FPKM | FDR       | log2FC    | regulated | nr_annotation                                                                                          |
|-----------------|----------------|----------------|----------------|----------------|----------------|----------------|-----------|-----------|-----------|--------------------------------------------------------------------------------------------------------|
| c46766.graph_c0 | 0.1011859      | 0.0228403      | 0.0619251      | 1.218475       | 1.5286103      | 1.6833503      | 5.388E-18 | 4.6106    | up        | PREDICTED: protein ESKIMO 1-like [Sesamum indicum]                                                     |
| c46784.graph_c0 | 25.071309      | 27.123662      | 23.775494      | 17.464536      | 9.7057357      | 8.1520469      | 0.0046566 | -1.048403 | down      | -                                                                                                      |
| c46784.graph_c1 | 26.646809      | 29.35437       | 26.22245       | 60.655509      | 79.439486      | 83.972382      | 2.017E-16 | 1.483129  | up        | PREDICTED: soluble inorganic pyrophosphatase [Sesamum indicum]                                         |
| c46787.graph_c1 | 6.4107899      | 6.7646891      | 6.6177227      | 1.6643918      | 1.7632213      | 3.2232786      | 0.0002827 | -1.537797 | down      | hypothetical protein MIMGU_mgv1a019568mg [Erythranthe guttata]                                         |
| c46819.graph_c0 | 27.119839      | 26.222582      | 29.12168       | 69.479049      | 51.736958      | 50.118216      | 0.0001982 | 1.10331   | up        | PREDICTED: putative ABC transporter C family member 15 [Sesamum indicum]                               |
| c46841.graph_c0 | 194.61888      | 198.162        | 211.29099      | 68.107003      | 77.674079      | 79.650113      | 1.586E-21 | -1.382752 | down      | PREDICTED: uncharacterized protein LOC104591752 [Nelumbo nucifera]                                     |
| c46855.graph_c1 | 2.6513575      | 3.4838454      | 2.9725947      | 9.5359028      | 6.5707281      | 5.6161388      | 0.0041909 | 1.305635  | up        | PREDICTED: peptide-N4-(N-acetyl-beta-glucosaminy)asparagine amidase A-like [Sesamum indicum]           |
| c46861.graph_c0 | 4.6126381      | 4.9277928      | 4.5396355      | 1.2497102      | 1.4657646      | 2.5218223      | 2.077E-06 | -1.392176 | down      | PREDICTED: pentatricopeptide repeat-containing protein At3g54980, mitochondrial-like [Sesamum indicum] |
| c46867.graph_c1 | 21.090427      | 22.105486      | 24.430434      | 42.998209      | 56.048013      | 59.718164      | 1.396E-12 | 1.267705  | up        | -                                                                                                      |
| c46868.graph_c0 | 21.484877      | 22.301453      | 22.177177      | 7.4966453      | 8.1395076      | 10.919089      | 1.526E-17 | -1.274678 | down      | PREDICTED: putative glycerol-3-phosphate transporter 4 isoform X1 [Sesamum indicum]                    |
| c46886.graph_c0 | 0.1571336      | 0.0945846      | 0              | 9.3613838      | 3.9387664      | 11.933333      | 1.464E-08 | 6.696091  | up        | -                                                                                                      |
| c46896.graph_c0 | 3.488459       | 1.7998579      | 1.9428861      | 0.2807542      | 0.5948501      | 0.4371735      | 0.0005003 | -2.430603 | down      | -                                                                                                      |
| c46898.graph_c0 | 0.0756853      | 0              | 0.0308793      | 1.2951461      | 2.2359337      | 0.9390033      | 3.908E-07 | 5.426442  | up        | hypothetical protein HMPREF1544_02206 [Mucor circinelloides f. circinelloides 1006PhL]                 |
| c46903.graph_c1 | 12.388058      | 12.000261      | 13.765921      | 26.118688      | 28.923492      | 33.069965      | 1.746E-14 | 1.246293  | up        | hypothetical protein MIMGU_mgv1a010174mg [Erythranthe guttata]                                         |
| c46917.graph_c0 | 0              | 0.0803383      | 0              | 1.6635863      | 0.9558606      | 3.060854       | 4.681E-06 | 6.188464  | up        | hypothetical protein CICLE_v10005479mg [Citrus clementina]                                             |
| c46943.graph_c0 | 5.9450981      | 6.4414395      | 6.3697729      | 1.1139952      | 1.5966638      | 2.0990673      | 8.903E-07 | -1.929881 | down      | PREDICTED: molybdenum cofactor sulfuryase-like [Sesamum indicum]                                       |
| c46943.graph_c1 | 7.4340906      | 7.3698676      | 7.7929376      | 14.927415      | 19.061425      | 21.12463       | 6.599E-13 | 1.322898  | up        | PREDICTED: SPX domain-containing membrane protein At4g22990-like [Sesamum indicum]                     |
| c46948.graph_c0 | 1.0573752      | 1.3127271      | 1.186363       | 9.7171814      | 7.6318887      | 6.1120323      | 4.218E-09 | 2.770986  | up        | Long-chain-alcohol oxidase FAO4A [Glycine soja]                                                        |
| c46948.graph_c1 | 3.0374994      | 3.1257313      | 3.0435439      | 20.298766      | 15.415757      | 13.62816       | 6.743E-10 | 2.471044  | up        | PREDICTED: long-chain-alcohol oxidase FAO4A-like isoform X1 [Sesamum indicum]                          |
| c46954.graph_c0 | 5.83541        | 5.5514473      | 5.6738398      | 2.4089235      | 2.8521932      | 2.5469177      | 0.0001322 | -1.087889 | down      | hypothetical protein MIMGU_mgv1a007683mg [Erythranthe guttata]                                         |
| c46957.graph_c6 | 30.947495      | 30.977087      | 28.409516      | 57.172079      | 58.537708      | 63.306293      | 2.279E-12 | 1.027892  | up        | PREDICTED: alpha-glucan phosphorylase, H isozyme [Sesamum indicum]                                     |
| c46968.graph_c1 | 42.80561       | 36.502261      | 47.345616      | 5.8047636      | 8.4366044      | 8.6084062      | 2.94E-30  | -2.435959 | down      | PREDICTED: lys-63-specific deubiquitinase BRCC36 [Sesamum indicum]                                     |
| c46979.graph_c0 | 3.6497813      | 4.1417024      | 3.5691947      | 21.907736      | 24.448161      | 25.932431      | 7.986E-68 | 2.709482  | up        | PREDICTED: probable boron transporter 2 [Sesamum indicum]                                              |
| c46984.graph_c0 | 70.761857      | 72.508419      | 78.104074      | 13.234427      | 14.928627      | 13.915481      | 2.47E-57  | -2.355088 | down      | PREDICTED: uncharacterized protein LOC105111157 [Sesamum indicum]                                      |
| c46988.graph_c0 | 136.20794      | 160.17861      | 160.06177      | 22.691068      | 21.268678      | 20.638576      | 1.475E-73 | -2.777202 | down      | PREDICTED: aspartic proteinase-like [Sesamum indicum]                                                  |

| #ID             | 28 h-1<br>FPKM | 28 h-2<br>FPKM | 28 h-3<br>FPKM | 48 h-1<br>FPKM | 48 h-2<br>FPKM | 48 h-3<br>FPKM | FDR       | log2FC    | regulated | nr_annotation                                                                             |
|-----------------|----------------|----------------|----------------|----------------|----------------|----------------|-----------|-----------|-----------|-------------------------------------------------------------------------------------------|
| c47000.graph_c0 | 11.667974      | 12.050748      | 11.631753      | 21.545519      | 25.867359      | 27.406462      | 4.793E-15 | 1.119917  | up        | PREDICTED: peroxidase 7-like [Sesamum indicum]                                            |
| c47011.graph_c0 | 0.2100855      | 0.2608203      | 0.4285701      | 3.029149       | 3.0326965      | 3.4950284      | 3.001E-16 | 3.449263  | up        | PREDICTED: condensin complex subunit 1 [Sesamum indicum]                                  |
| c47025.graph_c0 | 168.34434      | 164.57779      | 157.95685      | 4.8160677      | 7.9801135      | 3.6260299      | 5.41E-148 | -4.863993 | down      | -                                                                                         |
| c47037.graph_c1 | 8.4460014      | 10.379762      | 8.0405129      | 1.1895477      | 1.5752269      | 2.3815178      | 9.462E-07 | -2.350155 | down      | glyceraldehyde-3-phosphate dehydrogenase [Leucophyllum frutescens]                        |
| c47037.graph_c4 | 21.318716      | 23.314555      | 26.58185       | 3.8349532      | 3.4013033      | 4.2852369      | 1.559E-19 | -2.585718 | down      | PREDICTED: glyceraldehyde-3-phosphate dehydrogenase, cytosolic [Sesamum indicum]          |
| c47052.graph_c0 | 0.4045429      | 0.1369741      | 0.1237889      | 2.1793488      | 1.9692329      | 1.3688269      | 7.146E-10 | 3.099366  | up        | PREDICTED: putative germin-like protein 2-1 [Sesamum indicum]                             |
| c47053.graph_c0 | 53.012876      | 38.486575      | 31.858987      | 11.350967      | 3.3669925      | 4.8480107      | 1.208E-07 | -2.591909 | down      | -                                                                                         |
| c47064.graph_c1 | 3.7168507      | 3.0832953      | 2.6727606      | 6.0659044      | 7.2683447      | 9.0393438      | 3.137E-07 | 1.277061  | up        | lipoxygenase [Actinidia arguta]                                                           |
| c47065.graph_c0 | 1.9345398      | 3.0082195      | 3.5517796      | 17.301434      | 31.894948      | 9.2731925      | 0.0082396 | 2.820061  | up        | predicted protein [Physcomitrella patens]                                                 |
| c47073.graph_c0 | 3.5650255      | 4.6739956      | 6.8143072      | 21.294695      | 36.133983      | 21.151135      | 3.281E-06 | 2.419185  | up        | component of cytosolic 80S ribosome and 40S small subunit [Volvox carteri f. nagariensis] |
| c47105.graph_c0 | 12.796323      | 12.178414      | 14.674815      | 1.6282909      | 3.051882       | 2.7862374      | 1.214E-14 | -2.377417 | down      | R3-MYB anthocyanin repressor [Petunia x hybrida]                                          |
| c47114.graph_c0 | 0.2031919      | 0.1375974      | 0.1036268      | 3.7024352      | 4.2633491      | 4.2684025      | 3.899E-28 | 4.822724  | up        | PREDICTED: subtilisin-like protease SBT5.3 [Sesamum indicum]                              |
| c47127.graph_c0 | 0.3288344      | 0.5938133      | 0              | 24.592487      | 30.026908      | 33.750585      | 7.809E-27 | 6.622253  | up        | -                                                                                         |
| c47131.graph_c1 | 1.2095458      | 0.8918869      | 0.8882815      | 0.1022126      | 0.4331272      | 0.5229517      | 0.0014723 | -1.476974 | down      | hypothetical protein MIMGU_mgv1a003156mg [Erythranthe guttata]                            |
| c47142.graph_c0 | 114.74918      | 95.782637      | 104.82124      | 355.91975      | 523.13505      | 527.00801      | 4.267E-16 | 2.191497  | up        | hypothetical protein MIMGU_mgv1a004716mg [Erythranthe guttata]                            |
| c47144.graph_c1 | 0.302339       | 0.6142134      | 0.5550888      | 5.077889       | 6.9018815      | 5.8822826      | 8.127E-15 | 3.639087  | up        | Peptide methionine sulfoxide reductase [Ectocarpus siliculosus]                           |
| c47150.graph_c1 | 3.6457171      | 3.0193208      | 2.9338426      | 7.4576848      | 7.1914924      | 7.6283377      | 1.781E-06 | 1.257063  | up        | hypothetical protein MIMGU_mgv1a011470mg [Erythranthe guttata]                            |
| c47165.graph_c0 | 3.2340076      | 4.1941899      | 8.7324387      | 25.415925      | 43.11173       | 23.211813      | 2.205E-05 | 2.539898  | up        | 40S ribosomal protein S8-B [Rozella allomyces CSF55]                                      |
| c47173.graph_c0 | 0.8547669      | 0.7717744      | 1.243339       | 2.3082836      | 2.5950616      | 3.1437196      | 0.0002468 | 1.52489   | up        | PREDICTED: alpha-N-acetylglucosaminidase-like [Sesamum indicum]                           |
| c47176.graph_c1 | 25.47884       | 31.087842      | 26.034982      | 1.4547885      | 2.4658753      | 3.6244939      | 1.016E-14 | -3.42209  | down      | -                                                                                         |
| c47178.graph_c2 | 10.202816      | 10.528213      | 10.246664      | 42.635672      | 39.094829      | 36.630247      | 9.579E-33 | 1.978386  | up        | PREDICTED: uncharacterized protein LOC105158099 [Sesamum indicum]                         |
| c47182.graph_c0 | 41.483398      | 37.982236      | 40.66178       | 165.51252      | 110.08952      | 90.821871      | 0.0017429 | 1.66128   | up        | PREDICTED: fructose-1,6-bisphosphatase, cytosolic [Sesamum indicum]                       |
| c47192.graph_c0 | 320.4012       | 300.60714      | 313.92934      | 135.91838      | 152.98836      | 153.44795      | 1.119E-10 | -1.039907 | down      | PREDICTED: protein NR11/PIK FAMILY 3.1-like [Sesamum indicum]                             |
| c47192.graph_c2 | 8.1109412      | 7.3234194      | 7.2487915      | 1.0403611      | 1.0373049      | 1.4157872      | 3.789E-12 | -2.659482 | down      | -                                                                                         |
| c47193.graph_c0 | 207.64791      | 197.57164      | 193.71266      | 59.702849      | 67.743774      | 59.454317      | 3.662E-24 | -1.63934  | down      | PREDICTED: phyto-sulfokine receptor 1 [Sesamum indicum]                                   |
| c47199.graph_c0 | 4.427264       | 5.5708506      | 9.4927126      | 32.41758       | 63.562078      | 29.429305      | 0.0004383 | 2.71916   | up        | RecName: Full=60S ribosomal protein L13a [Cyanophora paradoxa]                            |
| c47202.graph_c1 | 0.0285693      | 0.0515908      | 0.1631863      | 1.1588391      | 1.9565664      | 0.8055688      | 1.658E-05 | 4.045401  | up        | -                                                                                         |
| c47211.graph_c0 | 0.7082971      | 0.5668525      | 0.5254224      | 2.6526465      | 1.4266952      | 1.7611535      | 0.0014782 | 1.750847  | up        | PREDICTED: uncharacterized protein LOC104880154 [Vitis vinifera]                          |

| #ID             | 28 h-1<br>FPKM | 28 h-2<br>FPKM | 28 h-3<br>FPKM | 48 h-1<br>FPKM | 48 h-2<br>FPKM | 48 h-3<br>FPKM | FDR       | log2FC    | regulated | nr_annotation                                                                                                                                          |
|-----------------|----------------|----------------|----------------|----------------|----------------|----------------|-----------|-----------|-----------|--------------------------------------------------------------------------------------------------------------------------------------------------------|
| c47234.graph_c0 | 120.17679      | 135.47106      | 134.58112      | 17.336206      | 19.561003      | 23.275392      | 5.982E-62 | -2.6588   | down      | PREDICTED: uncharacterized protein LOC105178088 [Sesamum indicum]                                                                                      |
| c47250.graph_c2 | 1.8779243      | 1.9378166      | 2.7363765      | 0.5100873      | 0.8405843      | 0.8573149      | 0.000577  | -1.536822 | down      | -                                                                                                                                                      |
| c47283.graph_c0 | 40.506442      | 38.599753      | 39.55364       | 10.773895      | 13.447749      | 15.376442      | 1.693E-23 | -1.546499 | down      | PREDICTED: probable trehalose-phosphate phosphatase J [Sesamum indicum]                                                                                |
| c47301.graph_c0 | 12.422161      | 11.084094      | 12.121921      | 5.7148734      | 5.4654748      | 5.7279039      | 3.549E-12 | -1.032813 | down      | PREDICTED: midasin [Sesamum indicum]                                                                                                                   |
| c47303.graph_c0 | 0.7184678      | 0.9081927      | 1.0943592      | 2.3678482      | 2.7014056      | 2.3770121      | 0.0006977 | 1.492604  | up        | hypothetical protein M569_00480, partial [Genlisea aurea]                                                                                              |
| c47312.graph_c1 | 60.062707      | 56.176499      | 68.790773      | 113.04861      | 136.48899      | 135.48698      | 5.241E-14 | 1.095442  | up        | hypothetical protein MIMGU_mgv1a004264mg [Erythranthe guttata]                                                                                         |
| c47328.graph_c0 | 127.2492       | 112.13844      | 121.471        | 60.580447      | 55.345042      | 44.823655      | 2.376E-13 | -1.120976 | down      | PREDICTED: DNA repair protein RAD16 [Sesamum indicum]                                                                                                  |
| c47334.graph_c0 | 304.889        | 407.31858      | 341.93891      | 60.092032      | 58.54587       | 51.773878      | 7.366E-29 | -2.584985 | down      | PREDICTED: em-like protein GEA6 [Sesamum indicum]                                                                                                      |
| c47345.graph_c0 | 3.1841922      | 4.6982148      | 5.0698045      | 20.377878      | 32.433981      | 15.329082      | 0.0001201 | 2.433282  | up        | PREDICTED: 40S ribosomal protein S24-1-like [Musa acuminata subsp. malaccensis]                                                                        |
| c47351.graph_c0 | 0.2980656      | 0.3289309      | 0.6756086      | 1.4693005      | 2.1346913      | 2.2038603      | 6.638E-07 | 2.190242  | up        | hypothetical protein MIMGU_mgv1a003544mg [Erythranthe guttata]                                                                                         |
| c47352.graph_c0 | 22.604236      | 21.65453       | 22.44327       | 37.922471      | 43.77837       | 50.462033      | 1.303E-12 | 1.024657  | up        | RUBISCO SUBUNIT BINDING-protein ALPHA SUBUNIT [Populus trichocarpa]                                                                                    |
| c47361.graph_c0 | 0.0925983      | 0.4737765      | 0.1763055      | 1.8388782      | 3.1500681      | 1.1488372      | 0.0009455 | 3.086703  | up        | -                                                                                                                                                      |
| c47364.graph_c0 | 2.4830531      | 1.9295593      | 2.8731486      | 0.5417746      | 0.5466139      | 1.239603       | 4.066E-05 | -1.612352 | down      | PREDICTED: pleiotropic drug resistance protein 1-like [Sesamum indicum]                                                                                |
| c47388.graph_c0 | 1.6093998      | 1.9002562      | 1.7678461      | 0.2353884      | 0.6649746      | 0.9774202      | 0.0017655 | -1.466563 | down      | -                                                                                                                                                      |
| c47422.graph_c1 | 133.20759      | 127.57202      | 128.46847      | 381.02004      | 282.13224      | 225.97291      | 0.0025949 | 1.24204   | up        | PREDICTED: aspartate aminotransferase, cytoplasmic [Sesamum indicum]                                                                                   |
| c47433.graph_c1 | 1.8864499      | 1.654622       | 1.3634045      | 0.4782428      | 0.4342631      | 0.729493       | 0.0010406 | -1.539254 | down      | hypothetical protein VITISV_042890 [Vitis vinifera]                                                                                                    |
| c47434.graph_c0 | 13.625395      | 13.592922      | 13.170804      | 30.460102      | 34.418331      | 25.792116      | 5.561E-11 | 1.20874   | up        | PREDICTED: type I inositol 1,4,5-trisphosphate 5-phosphatase 2 isoform X1 [Sesamum indicum]                                                            |
| c47450.graph_c0 | 0.156775       | 0.377475       | 0.5543508      | 4.1732006      | 6.3858888      | 4.538464       | 1.328E-16 | 3.829464  | up        | -                                                                                                                                                      |
| c47459.graph_c0 | 0.6967511      | 0.6862919      | 1.9640584      | 7.3866246      | 14.799897      | 5.0008716      | 0.0037912 | 3.055279  | up        | -                                                                                                                                                      |
| c47464.graph_c1 | 1.1461723      | 0.7625477      | 0.6891443      | 1.6822564      | 2.9972467      | 2.44941        | 0.0005833 | 1.489725  | up        | PREDICTED: glutamate synthase 1 [NADH], chloroplastic isoform X1 [Sesamum indicum]                                                                     |
| c47466.graph_c0 | 4.0170471      | 4.8683488      | 4.6801782      | 51.082407      | 27.750119      | 17.92915       | 0.0056867 | 2.893506  | up        | hypothetical protein MIMGU_mgv1a004441mg [Erythranthe guttata]                                                                                         |
| c47467.graph_c0 | 0.1333591      | 0              | 0.1088199      | 7.3251733      | 12.356519      | 8.3729884      | 3.75E-25  | 6.889079  | up        | Protein bli-3 OS=Neurospora crassa (strain ATCC 24698 / 74-OR23-1A / CBS 708,71 / DSM 1257 / FGSC 987) GN=bli-3 PE=2 SV=1 [Rhizoctonia solani AG-1 IB] |
| c47468.graph_c1 | 13005.458      | 11549.554      | 11593.664      | 42781.52       | 38273.95       | 43600.174      | 2.516E-06 | 1.829121  | up        | PREDICTED: non-specific lipid-transfer protein 1-like [Sesamum indicum]                                                                                |
| c47469.graph_c0 | 168.99069      | 176.80353      | 174.22974      | 69.408706      | 84.445918      | 79.892533      | 2.417E-13 | -1.114781 | down      | hypothetical protein MIMGU_mgv1a011464mg [Erythranthe guttata]                                                                                         |
| c47487.graph_c0 | 2.9999024      | 3.3242285      | 3.1155038      | 27.525619      | 40.100798      | 46.369716      | 6.242E-19 | 3.628365  | up        | PREDICTED: vinorine synthase-like [Sesamum indicum]                                                                                                    |

| #ID             | 28 h-1<br>FPKM | 28 h-2<br>FPKM | 28 h-3<br>FPKM | 48 h-1<br>FPKM | 48 h-2<br>FPKM | 48 h-3<br>FPKM | FDR       | log2FC    | regulated | nr_annotation                                                                                             |
|-----------------|----------------|----------------|----------------|----------------|----------------|----------------|-----------|-----------|-----------|-----------------------------------------------------------------------------------------------------------|
| c47495.graph_c3 | 44.121634      | 44.240813      | 39.413694      | 168.54759      | 168.38997      | 188.89322      | 5.418E-47 | 2.082324  | up        | hypothetical protein M569_11087, partial [Genlisea aurea]                                                 |
| c47497.graph_c0 | 3.30912        | 5.2286939      | 6.6986099      | 30.329847      | 42.641667      | 21.460658      | 3.056E-06 | 2.67143   | up        | alpha-tubulin, partial [Syntrichia caninervis]                                                            |
| c47499.graph_c0 | 14.016201      | 13.4966        | 14.217637      | 62.377018      | 42.236715      | 37.562279      | 0.0001406 | 1.819786  | up        | replication factor C / DNA polymerase III gamma-tau subunit, putative [Ricinus communis]                  |
| c47502.graph_c1 | 7.9349348      | 7.3237133      | 8.1375175      | 2.6821638      | 2.6572608      | 2.894825       | 1.293E-09 | -1.46516  | down      | PREDICTED: uncharacterized protein LOC105160556 [Sesamum indicum]                                         |
| c47507.graph_c3 | 0.4975364      | 0.8086118      | 0.6495771      | 1.6397266      | 2.8728821      | 3.2547344      | 2.11E-05  | 2.021493  | up        | PREDICTED: uncharacterized protein LOC105175228 [Sesamum indicum]                                         |
| c47509.graph_c0 | 0.2738356      | 0.061812       | 0.5027571      | 5.1198251      | 8.7332918      | 3.8606691      | 5.001E-07 | 4.435625  | up        | Peptidyl-prolyl cis-trans isomerase,FKBP-type,N-terminal [Ostreococcus tauri]                             |
| c47526.graph_c0 | 11.204607      | 10.595922      | 8.7819653      | 2.7657821      | 5.5036689      | 6.1856972      | 0.0001211 | -1.051174 | down      | -                                                                                                         |
| c47528.graph_c0 | 0.5885636      | 0.8695926      | 1.2661481      | 5.6292688      | 4.813932       | 5.9141105      | 2.189E-10 | 2.628539  | up        | expressed unknown protein [Ectocarpus siliculosus]                                                        |
| c47533.graph_c2 | 3.6200299      | 2.7439659      | 2.7715744      | 0.963051       | 0.6601525      | 0.9073238      | 3.789E-05 | -1.805335 | down      | hypothetical protein MIMGU_mgv1a0267602mg, partial [Erythranthe guttata]                                  |
| c47540.graph_c0 | 4.3904349      | 3.4872607      | 4.9293857      | 1.380839       | 1.4628315      | 1.4148232      | 2.952E-05 | -1.54779  | down      | hypothetical protein MIMGU_mgv1a008287mg [Erythranthe guttata]                                            |
| c47540.graph_c1 | 4.8004182      | 5.3674634      | 4.8726707      | 1.9489758      | 1.6565644      | 1.5527022      | 2.321E-13 | -1.49773  | down      | PREDICTED: xylem serine proteinase 1 [Sesamum indicum]                                                    |
| c47545.graph_c0 | 0.2124094      | 0.2876787      | 0.238321       | 2.0529902      | 6.8455684      | 2.2759362      | 0.0078702 | 3.947184  | up        | PREDICTED: KDEL-tailed cysteine endopeptidase CEP1-like [Glycine max]                                     |
| c47550.graph_c1 | 1.0447541      | 0.6603205      | 0.9093449      | 5.2530678      | 6.4067514      | 9.5054106      | 1.93E-09  | 3.051795  | up        | -                                                                                                         |
| c47554.graph_c5 | 280.34158      | 315.70888      | 304.51554      | 141.01254      | 139.06681      | 157.4735       | 7.078E-11 | -1.00001  | down      | hypothetical protein POP1K_00035102801g, partial [Populus trichocarpa]                                    |
| c47555.graph_c0 | 0.4244934      | 0.4216055      | 0.5195747      | 1.0761533      | 0.8360396      | 1.1969435      | 0.0028132 | 1.230243  | up        | PREDICTED: kinesin-4 [Sesamum indicum]                                                                    |
| c47564.graph_c1 | 65.775273      | 62.085811      | 64.279489      | 154.11178      | 164.61855      | 157.81551      | 4.363E-19 | 1.351605  | up        | PREDICTED: pentatricopeptide repeat-containing protein At5g62370 [Sesamum indicum]                        |
| c47564.graph_c4 | 0              | 0.03319        | 0.1499755      | 3.6343975      | 4.9855199      | 2.8607268      | 1.55E-18  | 6.006508  | up        | PREDICTED: probable pectinesterase/pectinesterase inhibitor 59 [Sesamum indicum]                          |
| c47580.graph_c1 | 208.64535      | 200.33243      | 213.11291      | 82.753573      | 85.937635      | 66.608696      | 2.74E-17  | -1.359258 | down      | PREDICTED: probable copper-transporting ATPase HMA5 [Nicotiana tomentosiformis]                           |
| c47586.graph_c0 | 6.0553837      | 7.874751       | 10.914765      | 35.456897      | 72.21182       | 32.823539      | 0.00127   | 2.53268   | up        | 60S ribosomal protein L8 [Rozella allomyces CSF55]                                                        |
| c47596.graph_c5 | 4.3343017      | 4.836246       | 4.0190395      | 6.4929642      | 13.492458      | 15.443436      | 0.0054652 | 1.454772  | up        | PREDICTED: probably inactive leucine-rich repeat receptor-like protein kinase At3g28040 [Sesamum indicum] |
| c47600.graph_c1 | 7.5746485      | 7.5251346      | 7.2565747      | 22.318356      | 23.673597      | 29.46049       | 2.685E-22 | 1.794031  | up        | PREDICTED: protein TIC 62, chloroplastic [Sesamum indicum]                                                |
| c47604.graph_c0 | 2.1881772      | 5.0804199      | 5.152543       | 21.000688      | 27.284893      | 22.846629      | 1.335E-21 | 2.556104  | up        | large subunit ribosomal protein L19e, cytoplasmic [Guillardia theta CCMP2712]                             |
| c47606.graph_c1 | 34.880742      | 29.442957      | 29.319461      | 84.278894      | 116.40938      | 120.6135       | 2.622E-16 | 1.814572  | up        | PREDICTED: serine carboxypeptidase-like 27 [Sesamum indicum]                                              |
| c47609.graph_c2 | 2.0919789      | 1.7839241      | 1.8967086      | 3.3883311      | 3.9016586      | 5.1122499      | 0.0086423 | 1.140373  | up        | -                                                                                                         |
| c47615.graph_c0 | 2.6862624      | 2.2388705      | 2.6416027      | 12.965327      | 9.6192591      | 10.60423       | 2.491E-13 | 2.180043  | up        | PREDICTED: vinorine synthase-like [Sesamum indicum]                                                       |

| #ID             | 28 h-1<br>FPKM | 28 h-2<br>FPKM | 28 h-3<br>FPKM | 48 h-1<br>FPKM | 48 h-2<br>FPKM | 48 h-3<br>FPKM | FDR       | log2FC    | regulated | nr_annotation                                                                                |
|-----------------|----------------|----------------|----------------|----------------|----------------|----------------|-----------|-----------|-----------|----------------------------------------------------------------------------------------------|
| c47622.graph_c1 | 710.6689       | 800.90527      | 884.3312       | 94.861854      | 96.29669       | 89.438419      | 8.495E-62 | -3.051722 | down      | PREDICTED: probable glycosyltransferase At5g05795 [Sesamum indicum]                          |
| c47627.graph_c0 | 5.3180031      | 5.1007778      | 4.951238       | 2.121745       | 2.3648009      | 2.163237       | 1.477E-05 | -1.167925 | down      | PREDICTED: pentatricopeptide repeat-containing protein At1g63330-like [Sesamum indicum]      |
| c47639.graph_c0 | 0.53164        | 0.3600158      | 1.247215       | 4.7172502      | 12.939579      | 5.6214923      | 0.0018829 | 3.471239  | up        | PREDICTED: cytochrome b5 [Phoenix dactylifera]                                               |
| c47660.graph_c0 | 21.035065      | 17.363522      | 18.856347      | 94.114713      | 117.3228       | 139.42241      | 5.615E-23 | 2.651889  | up        | PREDICTED: beta-galactosidase-like [Sesamum indicum]                                         |
| c47664.graph_c0 | 1.3488041      | 1.3669674      | 1.0556902      | 3.5240932      | 5.6554699      | 6.147247       | 3.43E-08  | 2.056323  | up        | PREDICTED: cytochrome P450 704C1-like [Sesamum indicum]                                      |
| c47672.graph_c1 | 1.8248119      | 1.9100891      | 1.7657543      | 3.234223       | 3.4696375      | 4.5352547      | 0.0001692 | 1.069421  | up        | PREDICTED: uncharacterized protein LOC10511120 [Sesamum indicum]                             |
| c47683.graph_c0 | 12.19978       | 12.736391      | 12.920658      | 27.609897      | 24.675929      | 29.841741      | 1.425E-13 | 1.159913  | up        | alpha-expansin 3 [Striga asiatica]                                                           |
| c47685.graph_c0 | 0              | 0.2034627      | 0.2298466      | 2.142282       | 4.0850784      | 2.8592845      | 3.226E-11 | 4.422718  | up        | -                                                                                            |
| c47689.graph_c0 | 47.769476      | 45.826008      | 46.300603      | 10.992029      | 13.560304      | 12.5116        | 8.603E-38 | -1.877518 | down      | PREDICTED: major facilitator superfamily domain-containing protein 12-like [Sesamum indicum] |
| c47697.graph_c0 | 1.1120712      | 1.6734934      | 2.319016       | 25.843257      | 19.911125      | 8.7799757      | 0.0004535 | 3.47044   | up        | predicted protein, partial [Micromonas pusilla CCMP1545]                                     |
| c47703.graph_c0 | 1.3233036      | 1.4744576      | 1.8379659      | 2.9265012      | 2.9868485      | 3.4931481      | 0.0048559 | 1.06081   | up        | PREDICTED: PI-PLC X domain-containing protein At5g67130-like [Nicotiana sylvestris]          |
| c47705.graph_c0 | 36.332974      | 41.122097      | 38.625146      | 72.001041      | 90.707038      | 101.0051       | 6.692E-07 | 1.220858  | up        | -                                                                                            |
| c47708.graph_c0 | 0.3952947      | 0.2974284      | 1.4515077      | 7.0984233      | 17.428518      | 6.1675195      | 0.0016528 | 3.868338  | up        | -                                                                                            |
| c47709.graph_c0 | 29.312946      | 33.378283      | 34.613477      | 3.0411908      | 2.9368542      | 2.9637508      | 4.59E-98  | -3.401199 | down      | hypothetical protein MIMGU_mgv1a025551mg [Erythranthe guttata]                               |
| c47713.graph_c3 | 18.321207      | 18.944583      | 15.426518      | 4.8804951      | 5.431712       | 5.5624765      | 1.084E-20 | -1.690656 | down      | hypothetical protein MIMGU_mgv1a016005mg [Erythranthe guttata]                               |
| c47721.graph_c0 | 13.228016      | 12.126639      | 14.822894      | 74.986621      | 68.801154      | 56.104373      | 3.56E-18  | 2.360042  | up        | PREDICTED: 17.4 kDa class III heat shock protein [Sesamum indicum]                           |
| c47726.graph_c0 | 23.71689       | 23.434329      | 30.550629      | 2.7415857      | 1.4021133      | 1.5141392      | 8.728E-33 | -3.724494 | down      | PREDICTED: E3 ubiquitin-protein ligase At4g11680-like [Sesamum indicum]                      |
| c47730.graph_c0 | 3.8147618      | 3.5413968      | 3.8142938      | 20.023021      | 27.561122      | 32.784534      | 7.06E-16  | 2.881706  | up        | hypothetical protein MIMGU_mgv1a012535mg [Erythranthe guttata]                               |
| c47753.graph_c0 | 46.40827       | 44.692852      | 46.615414      | 18.934975      | 21.475649      | 20.223406      | 5.619E-15 | -1.143379 | down      | PREDICTED: transcription factor PIF1 [Sesamum indicum]                                       |
| c47756.graph_c0 | 64.204493      | 66.362045      | 64.334582      | 22.08852       | 21.892101      | 14.282075      | 2.362E-30 | -1.696326 | down      | ent-copalyl diphosphate synthase [Andrographis paniculata]                                   |
| c47763.graph_c3 | 1.4653137      | 1.3002299      | 1.4224517      | 4.4833626      | 5.1906113      | 6.4113253      | 2.758E-10 | 1.978836  | up        | PREDICTED: U-box domain-containing protein 5 [Sesamum indicum]                               |
| c47765.graph_c0 | 0.8111985      | 1.0653617      | 1.2335993      | 2.710851       | 2.0300782      | 2.6200385      | 0.0023987 | 1.288141  | up        | -                                                                                            |
| c47771.graph_c0 | 58.180172      | 60.544189      | 60.263924      | 13.373552      | 14.244376      | 13.467718      | 2.047E-46 | -2.081781 | down      | PREDICTED: floral homeotic protein AGAMOUS-like isoform X1 [Sesamum indicum]                 |
| c47778.graph_c0 | 5.5785699      | 4.9169987      | 5.1868796      | 8.8029824      | 10.293934      | 12.498303      | 4.45E-08  | 1.048011  | up        | PREDICTED: CBS domain-containing protein CBSCBSPB1-like isoform X3 [Sesamum indicum]         |
| c47795.graph_c0 | 6.0629141      | 8.0530186      | 10.139897      | 48.143588      | 60.01853       | 49.337025      | 5.092E-51 | 2.737891  | up        | unnamed protein product [Vitis vinifera]                                                     |
| c47805.graph_c0 | 0.616219       | 0.715356       | 1.4725726      | 4.5750316      | 5.9105991      | 3.5743923      | 5.417E-08 | 2.36537   | up        | -                                                                                            |

| #ID             | 28 h-1<br>FPKM | 28 h-2<br>FPKM | 28 h-3<br>FPKM | 48 h-1<br>FPKM | 48 h-2<br>FPKM | 48 h-3<br>FPKM | FDR       | log2FC    | regulated | nr_annotation                                                                     |
|-----------------|----------------|----------------|----------------|----------------|----------------|----------------|-----------|-----------|-----------|-----------------------------------------------------------------------------------|
| c47806.graph_c0 | 29.045571      | 27.050223      | 27.704021      | 80.625176      | 94.090154      | 112.32239      | 7.651E-20 | 1.813897  | up        | hypothetical protein MIMGU_mgv1a0009861mg, partial [Erythranthe guttata]          |
| c47832.graph_c0 | 3.2362643      | 2.6532153      | 2.6090761      | 7.8762305      | 12.81138       | 11.826376      | 3.447E-10 | 1.969727  | up        | hypothetical protein MIMGU_mgv1a000209mg [Erythranthe guttata]                    |
| c47836.graph_c1 | 28.384539      | 29.348195      | 28.246996      | 13.045196      | 14.407449      | 13.803098      | 3.309E-12 | -1.018777 | down      | PKEDIC1ED: uncharacterized protein LOC1051175629 [Sesamum indicum]                |
| c47847.graph_c0 | 0.0960444      | 0.0867191      | 0.0783714      | 1.4609199      | 2.5794458      | 1.5707339      | 1.447E-10 | 4.460558  | up        | triosephosphate isomerase [Genlisea aurea]                                        |
| c47848.graph_c2 | 5.1059837      | 5.516508       | 5.2703698      | 0.7744525      | 1.8459867      | 1.7719796      | 3.004E-09 | -1.827176 | down      | PKEDIC1ED: auxin response factor 18-like isoform X1 [Sesamum indicum]             |
| c47848.graph_c3 | 3.3258682      | 2.3552527      | 4.3102821      | 0.5786369      | 0.9632788      | 0.8826302      | 3.479E-05 | -2.010376 | down      | -                                                                                 |
| c47853.graph_c3 | 99.028605      | 100.6816       | 102.71457      | 49.509253      | 42.439343      | 44.053035      | 7.207E-14 | -1.108075 | down      | PREDICTED: probable indole-3-acetic acid-amido synthetase GH3.1 [Sesamum indicum] |
| c47865.graph_c0 | 20.551422      | 18.772161      | 20.301066      | 8.5667667      | 8.0863006      | 8.8480984      | 1.31E-13  | -1.182982 | down      | PKEDIC1ED: transcription factor G1E4-like isoform X5 [Sesamum indicum]            |
| c47865.graph_c1 | 16.61539       | 12.432712      | 10.786493      | 5.3525778      | 5.0540585      | 6.2122063      | 0.0007641 | -1.219548 | down      | PKEDIC1ED: transcription factor G1E4-like isoform X5 [Sesamum indicum]            |
| c47865.graph_c4 | 83.939776      | 79.862901      | 81.091076      | 198.78262      | 222.66228      | 200.16824      | 4.394E-17 | 1.384642  | up        | PREDICTED: patellin-3-like [Sesamum indicum]                                      |
| c47865.graph_c6 | 90.345113      | 95.95397       | 102.19468      | 38.709866      | 31.137143      | 18.475801      | 6.527E-20 | -1.656887 | down      | hypothetical protein VITISV_027452 [Vitis vinifera]                               |
| c47884.graph_c0 | 0.1022698      | 0.1385101      | 0.2920797      | 6.6761777      | 6.8666027      | 4.6139206      | 1.052E-23 | 5.133821  | up        | cysteine peroxiredoxin [Lichtheimia corymbifera JMRC:FSU:9682]                    |
| c47891.graph_c1 | 12.623677      | 11.925682      | 12.621681      | 4.8399419      | 5.0750118      | 7.6023811      | 8.01E-05  | -1.047885 | down      | hypothetical protein MIMGU_mgv1a011954mg [Erythranthe guttata]                    |
| c47898.graph_c0 | 1.7542646      | 1.5839364      | 1.5268966      | 3.1131234      | 5.3395814      | 5.2762638      | 0.0001577 | 1.52937   | up        | PREDICTED: chlorophyll a-b binding protein 13, chloroplastic [Sesamum indicum]    |
| c47903.graph_c0 | 0.3753623      | 0.4929702      | 0.4733613      | 1.0381078      | 1.0997494      | 0.8467269      | 0.0086423 | 1.196631  | up        | unknown [Chondrus crispus]                                                        |
| c47912.graph_c0 | 0.2055644      | 0.3248094      | 0.3774124      | 2.2799699      | 4.8307034      | 3.1299998      | 3.841E-07 | 3.527103  | up        | -                                                                                 |
| c47914.graph_c0 | 3.6066016      | 4.5500706      | 5.5230846      | 22.858166      | 44.649319      | 20.673399      | 0.0003495 | 2.722544  | up        | hypothetical protein JCGZ_08960 [Jatropha curcas]                                 |
| c47917.graph_c0 | 67.298281      | 61.371172      | 57.29251       | 28.127385      | 33.635117      | 27.555616      | 1.021E-10 | -1.017609 | down      | PKEDIC1ED: uncharacterized protein LOC105117054 [Sesamum indicum]                 |
| c47923.graph_c0 | 0.9361289      | 0.9508913      | 0.98667        | 6.5758103      | 9.8994416      | 2.7275881      | 0.0060747 | 2.781834  | up        | --                                                                                |
| c47924.graph_c0 | 15.570227      | 17.312083      | 15.645609      | 9.599516       | 7.8665014      | 5.933472       | 5.813E-09 | -1.003514 | down      | PREDICTED: cysteine-rich receptor-like protein kinase 3 [Nicotiana glauca]        |
| c47927.graph_c0 | 0.056808       | 0.0256462      | 0              | 1.0801254      | 1.2968302      | 0.6727624      | 2.682E-11 | 5.253922  | up        | hypothetical protein MVLG_0630/ [Microbotryum violaceum p1A11 amo1e1]             |
| c47948.graph_c0 | 332.61653      | 275.5077       | 325.30287      | 951.60968      | 1086.049       | 1074.57        | 1.927E-17 | 1.77676   | up        | PREDICTED: alpha-L-arabinofuranosidase 1-like isoform X2 [Sesamum indicum]        |
| c47954.graph_c0 | 1.9910543      | 3.5954707      | 4.7537051      | 17.853604      | 28.71718       | 11.477864      | 0.0011192 | 2.527094  | up        | 40S ribosomal protein S11 [Auxenochlorella protothecoides]                        |
| c47961.graph_c0 | 2.6052594      | 1.6516184      | 2.6460302      | 5.2345891      | 6.773591       | 6.7521105      | 7.229E-07 | 1.479012  | up        | PKEDIC1ED: probable polygalacturonase At5g15720-like [Glycine max]                |
| c47968.graph_c0 | 69.437595      | 67.51082       | 76.687071      | 26.177549      | 27.14734       | 25.56358       | 2.482E-22 | -1.39555  | down      | PREDICTED: alpha-galactosidase-like [Sesamum indicum]                             |
| c47983.graph_c0 | 2.7541966      | 4.1085952      | 5.4230787      | 16.848579      | 35.537252      | 13.033381      | 0.0098601 | 2.446214  | up        | PREDICTED: 40S ribosomal protein S19-3 [Prunus mume]                              |

| #ID             | 28 h-1<br>FPKM | 28 h-2<br>FPKM | 28 h-3<br>FPKM | 48 h-1<br>FPKM | 48 h-2<br>FPKM | 48 h-3<br>FPKM | FDR       | log2FC    | regulated | nr_annotation                                                                                                |
|-----------------|----------------|----------------|----------------|----------------|----------------|----------------|-----------|-----------|-----------|--------------------------------------------------------------------------------------------------------------|
| c48011.graph_c0 | 0.4735725      | 0.6468694      | 0.7035032      | 1.9547843      | 2.5111178      | 3.2458835      | 2.632E-09 | 2.115186  | up        | PREDICTED: NADP-dependent malic enzyme-like isoform X1 [Sesamum indicum]                                     |
| c48037.graph_c1 | 0.814341       | 0.2321917      | 0.769416       | 4.4005904      | 13.295025      | 5.0758022      | 0.003943  | 3.675288  | up        | --                                                                                                           |
| c48042.graph_c0 | 95.88233       | 96.966053      | 96.405556      | 43.331955      | 41.106377      | 39.519534      | 2.15E-16  | -1.178941 | down      | PREDICTED: LOW QUALITY PROTEIN: cell division protein FtsZ homolog 2-2, chloroplastic-like [Sesamum indicum] |
| c48045.graph_c1 | 0.7980271      | 0.9112757      | 0.459659       | 1.8743576      | 3.1203144      | 2.2501957      | 4.84E-06  | 1.776052  | up        | PREDICTED: putative nuclease HARBI1 [Brassica rapa]                                                          |
| c48046.graph_c0 | 28.006456      | 26.872372      | 27.355429      | 13.24636       | 11.89991       | 11.833678      | 2.866E-09 | -1.108676 | down      | PREDICTED: uncharacterized protein LOC105112478 [Sesamum indicum]                                            |
| c48062.graph_c1 | 14.711835      | 15.162835      | 14.077498      | 28.576225      | 29.278157      | 29.008215      | 1.265E-09 | 1.024668  | up        | PREDICTED: uncharacterized protein LOC102581921 [Solanum tuberosum]                                          |
| c48068.graph_c1 | 122.60825      | 119.42017      | 122.97285      | 244.677        | 293.06764      | 307.8008       | 2.524E-12 | 1.250225  | up        | truncated cellulose synthase catalytic subunit [Gossypium hirsutum subsp. latifolium]                        |
| c48068.graph_c2 | 0.2689834      | 0.1734763      | 0.3449101      | 1.5586573      | 1.7028087      | 1.6469247      | 6.419E-09 | 2.679751  | up        | hypothetical protein MIMGU_mgv1a000605mg [Erythranthe guttata]                                               |
| c48071.graph_c1 | 67.715065      | 65.730295      | 62.895261      | 147.57251      | 160.62353      | 189.15964      | 2.703E-20 | 1.380094  | up        | hypothetical protein POPTR_0003s13500g [Populus trichocarpa]                                                 |
| c48076.graph_c1 | 29.034295      | 24.491341      | 25.178078      | 9.3746388      | 14.646447      | 12.549374      | 2.271E-11 | -1.070714 | down      | PREDICTED: aspartokinase 2, chloroplastic isoform X1 [Sesamum indicum]                                       |
| c48091.graph_c0 | 0.5341487      | 0.4913859      | 0.435861       | 1.3669206      | 1.5292877      | 1.7846318      | 5.369E-07 | 1.718295  | up        | PREDICTED: myosin-2-like [Sesamum indicum]                                                                   |
| c48097.graph_c0 | 0.2489861      | 0.4721033      | 0.2641218      | 0.9783854      | 0.8693064      | 0.6178178      | 0.0024813 | 1.371787  | up        | PREDICTED: lisH domain and HEAT repeat-containing protein KIAA1468 homolog isoform X1 [Sesamum indicum]      |
| c48112.graph_c1 | 2.0009031      | 2.5014847      | 2.6374717      | 7.316227       | 4.6503932      | 5.9023408      | 0.0009295 | 1.372519  | up        | PREDICTED: cytochrome P450 90A1 [Sesamum indicum]                                                            |
| c48133.graph_c0 | 1.7919511      | 1.3207868      | 1.3130116      | 2.7813429      | 3.8795524      | 4.2071977      | 1.282E-05 | 1.331507  | up        | PREDICTED: probable LRR receptor-like serine/threonine-protein kinase MRH1 isoform X3 [Nelumbo nucifera]     |
| c48135.graph_c0 | 1.4355027      | 1.6664456      | 2.8781951      | 0.571876       | 0.3855303      | 0.370074       | 0.0010522 | -2.12181  | down      | PREDICTED: formin-like protein 3 [Nicotiana tomentosiformis]                                                 |
| c48142.graph_c0 | 113.51757      | 108.76494      | 116.89586      | 36.035243      | 37.735167      | 37.235546      | 5.065E-26 | -1.570175 | down      | PREDICTED: pentatricopeptide repeat-containing protein At5g39350 [Vitis vinifera]                            |
| c48143.graph_c3 | 397.40878      | 369.06091      | 357.62412      | 1194.1574      | 992.7959       | 849.46841      | 1.683E-07 | 1.48096   | up        | PREDICTED: haloacid dehalogenase-like hydrolase domain-containing protein 3 [Sesamum indicum]                |
| c48148.graph_c0 | 2.4095602      | 1.9391279      | 2.4790984      | 0.7303749      | 1.055105       | 0.8271241      | 0.0026163 | -1.349289 | down      | PREDICTED: SNF2 domain-containing protein CLASSY 3-like [Sesamum indicum]                                    |
| c48149.graph_c0 | 0.4516758      | 0.8156418      | 1.0406506      | 2.9300184      | 4.7451942      | 1.7980088      | 0.0080932 | 2.075507  | up        | citrate synthase, mitochondrial, putative (ISS), partial [Ostreococcus tauri]                                |
| c48159.graph_c0 | 0.0451526      | 0.0203843      | 0.0368441      | 0.6868107      | 1.8189817      | 0.53473        | 0.0017465 | 4.922524  | up        | atp-dependent rna helicase rrp5 [Lichtheimia corymbifera]                                                    |
| c48160.graph_c0 | 0.1850801      | 0.233954       | 0.1812287      | 1.5014574      | 1.2923723      | 0.876742       | 2.46E-07  | 2.661203  | up        | IMRC-FSU-96821<br>hypothetical protein VOLCADRAFT_45401 [Volvox carterii naeariensis]                        |
| c48181.graph_c0 | 36.20092       | 33.772525      | 35.495304      | 10.277964      | 13.017583      | 11.948467      | 1.113E-26 | -1.543128 | down      | PREDICTED: probable leucine-rich repeat receptor-like protein kinase At1g35710 [Sesamum indicum]             |
| c48194.graph_c2 | 0.4417289      | 0.4985497      | 0.4730869      | 1.4698003      | 1.9278074      | 2.8336089      | 9.714E-06 | 2.174451  | up        | PREDICTED: 125 kDa kinesin-related protein [Sesamum indicum]                                                 |
| c48197.graph_c0 | 0.5799103      | 1.1053875      | 1.4721842      | 3.5937196      | 4.7588877      | 2.034881       | 0.0075611 | 1.759624  | up        | Heat Shock Protein 70 [Ostreococcus lucimarinus CCE9901]                                                     |



| #ID             | 28 h-1<br>FPKM | 28 h-2<br>FPKM | 28 h-3<br>FPKM | 48 h-1<br>FPKM | 48 h-2<br>FPKM | 48 h-3<br>FPKM | FDR       | log2FC    | regulated | nr_annotation                                                                                                                                               |
|-----------------|----------------|----------------|----------------|----------------|----------------|----------------|-----------|-----------|-----------|-------------------------------------------------------------------------------------------------------------------------------------------------------------|
| c48200.graph_c0 | 0.0871323      | 0.0786723      | 0.1421985      | 1.5462529      | 4.5046856      | 2.3094567      | 5.266E-05 | 4.789392  | up        | hypothetical protein EMMHODRAFT_ZZ5441 [Emmilia nuxteyi<br>CCMP15161]                                                                                       |
| c48208.graph_c0 | 3.5315375      | 5.247982       | 5.4632339      | 28.071285      | 45.348166      | 22.156263      | 1.19E-05  | 2.783997  | up        | PREDICTED: 40S ribosomal protein S13-1-like [Camelina sativa]                                                                                               |
| c48239.graph_c3 | 230.6108       | 273.69789      | 262.57924      | 70.842242      | 93.746036      | 78.84828       | 3.03E-29  | -1.617273 | down      | PREDICTED: beta-hexosaminidase 2 [Sesamum indicum]                                                                                                          |
| c48244.graph_c1 | 21.880295      | 20.500839      | 37.428865      | 1735.4834      | 1713.0052      | 2250.8296      | 1.582E-87 | 6.196914  | up        | PREDICTED: putative mannan endo-1,4-beta-mannosidase 9 [Sesamum indicum]                                                                                    |
| c48244.graph_c3 | 7.8517109      | 7.5825316      | 7.9111682      | 12.981681      | 24.021062      | 18.558641      | 0.0004178 | 1.283754  | up        | RecName: Full=Luminal-binding protein 8; Short=BiP 8; AltName: Full=78 kDa glucose-regulated protein homolog 8; Short=GRP-78-8, partial [Nicotiana tabacum] |
| c48244.graph_c4 | 6.3510894      | 6.8902165      | 5.4636546      | 12.16932       | 20.693184      | 14.604172      | 7.444E-05 | 1.378677  | up        | hypothetical protein JCGZ_10646 [Jatropha curcas]                                                                                                           |
| c48250.graph_c2 | 31.655001      | 36.855089      | 32.627649      | 14.186086      | 16.487509      | 18.545964      | 1.702E-09 | -1.000541 | down      | hypothetical protein MIMGU_mgv1a010855mg [Erythranthe guttata]                                                                                              |
| c48250.graph_c3 | 3.8968002      | 3.4561718      | 3.2641754      | 6.9939557      | 8.8447898      | 11.279513      | 1.077E-06 | 1.388732  | up        | PREDICTED: probable pectin methylintransferase QUAZ [Sesamum indicum]                                                                                       |
| c48251.graph_c1 | 13.209316      | 14.967594      | 14.809254      | 2.8459684      | 5.9294183      | 7.8924147      | 1.282E-07 | -1.338753 | down      | hypothetical protein Csa_6G486800 [Cucumis sativus]                                                                                                         |
| c48259.graph_c1 | 90.953397      | 77.102284      | 80.110225      | 514.171        | 675.19654      | 671.43406      | 1.399E-53 | 2.94356   | up        | PREDICTED: dehydrodolichyl diphosphate synthase 6 [Sesamum indicum]                                                                                         |
| c48264.graph_c0 | 36.00751       | 38.221381      | 36.696905      | 15.139674      | 17.129714      | 16.754985      | 3.205E-15 | -1.138029 | down      | PREDICTED: phytoisoflavone receptor 1 [Sesamum indicum]                                                                                                     |
| c48288.graph_c0 | 18.451318      | 17.644923      | 16.957823      | 31.752158      | 38.710603      | 38.315089      | 1.998E-13 | 1.074361  | up        | GIGANTEA family protein [Populus trichocarpa]                                                                                                               |
| c48291.graph_c0 | 1.1877372      | 0.9008289      | 1.1630206      | 3.0713105      | 2.9984904      | 3.7509482      | 8.379E-05 | 1.634901  | up        | PREDICTED: homeobox-leucine zipper protein ATHB-12-like [Sesamum indicum]                                                                                   |
| c48295.graph_c0 | 0.3681873      | 0.2949807      | 0.3681421      | 2.2217765      | 2.36763        | 3.0823628      | 5.599E-27 | 2.933337  | up        | PREDICTED: phragmoplast orienting kinesin 2 [Sesamum indicum]                                                                                               |
| c48296.graph_c0 | 0.1706357      | 0.2054241      | 0.1856498      | 2.0187381      | 1.6803351      | 2.8226959      | 1.089E-11 | 3.578204  | up        | hypothetical protein CHLNCDRAFT_48764 [Chlorella variabilis]                                                                                                |
| c48300.graph_c0 | 6.3648316      | 6.3322634      | 6.1988733      | 2.6573365      | 2.6409943      | 3.2542098      | 2.407E-08 | -1.10322  | down      | hypothetical protein MIMGU_mgv1a0002422mg, partial [Erythranthe guttata]                                                                                    |
| c48303.graph_c3 | 29.368274      | 29.537699      | 31.244557      | 14.607848      | 9.2352259      | 13.941376      | 3.627E-06 | -1.207306 | down      | hexose transport protein [Actinidia deliciosa]                                                                                                              |
| c48309.graph_c0 | 11.337606      | 15.022042      | 12.20746       | 32.229017      | 34.052649      | 38.816349      | 7.062E-13 | 1.486571  | up        | PREDICTED: hydroquinone glucosyltransferase [Sesamum indicum]                                                                                               |
| c48309.graph_c2 | 3.5096077      | 5.0034421      | 2.9391747      | 0.9365655      | 1.7363108      | 1.7708695      | 0.0037525 | -1.333669 | down      | -                                                                                                                                                           |
| c48309.graph_c4 | 5.8665912      | 7.4227442      | 6.2988033      | 16.536064      | 16.014935      | 14.496032      | 1.914E-08 | 1.308025  | up        | PREDICTED: hydroquinone glucosyltransferase [Sesamum indicum]                                                                                               |
| c48322.graph_c0 | 0.5536435      | 0.4998882      | 0.7471557      | 0.9986925      | 1.8014485      | 2.3536701      | 0.0048119 | 1.546472  | up        | PREDICTED: uncharacterized acetyltransferase At3g50280-like [Sesamum indicum]                                                                               |
| c48322.graph_c3 | 0.2060106      | 0.345444       | 0.168103       | 1.5294972      | 7.3111857      | 7.6677206      | 0.0004532 | 4.541805  | up        | PREDICTED: omega-hydroxypalmitate O-feruloyl transferase isoform X1 [Sesamum indicum]                                                                       |
| c48327.graph_c0 | 0.358406       | 0.4179924      | 0.3533848      | 1.1736238      | 1.143045       | 1.7348578      | 2.221E-06 | 1.881496  | up        | hypothetical protein MIMGU_mgv1a001429mg [Erythranthe guttata]                                                                                              |
| c48332.graph_c0 | 20.093594      | 17.533222      | 17.968133      | 48.052776      | 61.498936      | 65.610535      | 7.815E-22 | 1.692616  | up        | PREDICTED: probable copper-transporting ATPase HMA5 [Sesamum indicum]                                                                                       |
| c48342.graph_c0 | 0.8489263      | 0.958126       | 1.1335367      | 4.6466942      | 4.4562566      | 5.462025       | 1.454E-14 | 2.349131  | up        | hypothetical protein MIMGU_mgv11b010420mg [Erythranthe guttata]                                                                                             |

| #ID             | 28 h-1<br>FPKM | 28 h-2<br>FPKM | 28 h-3<br>FPKM | 48 h-1<br>FPKM | 48 h-2<br>FPKM | 48 h-3<br>FPKM | FDR       | log2FC    | regulated | nr_annotation                                                                                |
|-----------------|----------------|----------------|----------------|----------------|----------------|----------------|-----------|-----------|-----------|----------------------------------------------------------------------------------------------|
| c48359.graph_c0 | 3.8566173      | 4.7879752      | 4.032053       | 0.1527671      | 0              | 0              | 9.958E-17 | -6.274163 | down      | -                                                                                            |
| c48364.graph_c0 | 2.7268429      | 3.8945684      | 4.9760914      | 19.544791      | 35.352197      | 13.53242       | 0.0022242 | 2.59698   | up        | predicted protein [Physcomitrella patens]                                                    |
| c48372.graph_c1 | 312.96565      | 269.95302      | 305.25374      | 585.28217      | 563.97673      | 805.83817      | 1.677E-06 | 1.177721  | up        | PREDICTED: uncharacterized protein LOC105170680 isoform X1 [Sesamum indicum]                 |
| c48374.graph_c0 | 4.7780894      | 4.5128455      | 5.9252746      | 27.135073      | 31.236824      | 23.683715      | 2.989E-29 | 2.472083  | up        | PREDICTED: GDSL esterase/lipase At1g29670-like [Sesamum indicum]                             |
| c48392.graph_c0 | 0.1295155      | 0.3274329      | 0.295914       | 2.1013812      | 3.2348867      | 2.2495987      | 2.868E-14 | 3.369611  | up        | hypothetical protein SELMODRAFT_1684/8 [Selaginella moellendorffii]                          |
| c48397.graph_c1 | 74.452828      | 80.953886      | 74.927883      | 297.26497      | 218.05047      | 191.64875      | 2.258E-05 | 1.667765  | up        | unnamed protein product [Vitis vinifera]                                                     |
| c48414.graph_c0 | 3.8158496      | 4.0717825      | 2.5475744      | 20.116984      | 12.344369      | 10.466103      | 0.001106  | 2.095152  | up        | PREDICTED: uncharacterized protein LOC105161268 [Sesamum indicum]                            |
| c48428.graph_c0 | 3.769453       | 6.7575998      | 6.1516858      | 25.205994      | 44.308867      | 29.02103       | 6.175E-08 | 2.597407  | up        | hypothetical protein MGL_1430 [Malassezia globosa CBS 7966]                                  |
| c48429.graph_c6 | 18.845409      | 19.31051       | 19.72797       | 2.2002054      | 4.9946803      | 4.6146481      | 4.427E-15 | -2.264366 | down      | PREDICTED: protein GLUTAMINE DUMPER $\alpha$ -like [Sesamum indicum]                         |
| c48432.graph_c1 | 0.764346       | 0.9457375      | 0.8547001      | 2.6912912      | 2.318892       | 2.0434729      | 0.0002517 | 1.50597   | up        | PREDICTED: uncharacterized protein LOC105156326 [Sesamum indicum]                            |
| c48435.graph_c0 | 2.5690861      | 4.327028       | 5.644028       | 28.870177      | 55.529687      | 28.418959      | 9.354E-06 | 3.203123  | up        | 60s ribosomal protein l10 [Lichtheimia corymbifera JMRC:FSU:9682]                            |
| c48436.graph_c0 | 0.0755814      | 0.2388501      | 0.1850213      | 1.101757       | 2.3343558      | 1.1934534      | 8.95E-05  | 3.245602  | up        | -                                                                                            |
| c48465.graph_c0 | 19.763928      | 16.945382      | 13.787764      | 38.841273      | 41.147619      | 46.096263      | 1.429E-21 | 1.36051   | up        | PREDICTED: elongation factor G-1, chloroplastic [Sesamum indicum]                            |
| c48472.graph_c0 | 0              | 0              | 0.0302167      | 1.548987       | 1.8895948      | 1.1694491      | 1.417E-20 | 7.289309  | up        | PREDICTED: hydroxyacylglutathione hydrolase cytoplasmic [Sesamum indicum]                    |
| c48480.graph_c0 | 3.6836367      | 5.7880666      | 6.7923667      | 38.870247      | 43.298258      | 30.917428      | 8.833E-22 | 2.839949  | up        | hypothetical protein SELMODRAFT_2/0900 [Selaginella moellendorffii]                          |
| c48481.graph_c0 | 241.38523      | 257.64002      | 253.07291      | 102.73851      | 109.1157       | 102.51387      | 1.54E-13  | -1.21696  | down      | PREDICTED: uncharacterized protein LOC105166591 [Sesamum indicum]                            |
| c48482.graph_c0 | 0.2281373      | 0.2059866      | 0.1489266      | 1.5615768      | 1.3479492      | 1.2865571      | 7.976E-10 | 2.893407  | up        | hypothetical protein PHACADRAFT_263295 [Phanerochaete carnosa HHB-10118-sp]                  |
| c48498.graph_c0 | 1741.8381      | 1873.0071      | 1923.6713      | 321.74047      | 315.58888      | 298.97274      | 2.239E-38 | -2.521519 | down      | hypothetical protein MIMGU_mgv1a004937mg [Erythranthe guttata]                               |
| c48500.graph_c0 | 2.7157054      | 2.5666081      | 2.3713201      | 1.1260045      | 1.2780699      | 1.1450423      | 0.0006449 | -1.067974 | down      | PREDICTED: phosphatidylinositol/phosphatidylcholine transfer protein SFH11 [Sesamum indicum] |
| c48503.graph_c0 | 72.424973      | 73.436601      | 72.767532      | 145.24856      | 146.75032      | 169.89286      | 7.32E-14  | 1.119733  | up        | PREDICTED: potassium transporter 4-like [Sesamum indicum]                                    |
| c48512.graph_c2 | 32.397202      | 34.080235      | 38.522566      | 11.544183      | 14.173282      | 15.667631      | 2.308E-19 | -1.305999 | down      | hypothetical protein MIMGU_mgv1a005052mg [Erythranthe guttata]                               |
| c48527.graph_c0 | 0.369283       | 0.4816181      | 0.6361451      | 4.5249029      | 7.3832243      | 4.8129662      | 9.507E-13 | 3.526558  | up        | conserved unknown protein [Ectocarpus siliculosus]                                           |
| c48530.graph_c1 | 0.0579952      | 0.0523642      | 0              | 1.7643157      | 10.357811      | 12.035728      | 1.662E-05 | 7.79568   | up        | PREDICTED: non-specific lipid-transfer protein-like protein At2g13820 [Sesamum indicum]      |
| c48536.graph_c0 | 1.3590657      | 1.7359102      | 1.677004       | 3.0672746      | 5.2969761      | 5.8323539      | 8.038E-05 | 1.604735  | up        | PREDICTED: glycerophosphodiester phosphodiesterase GDPD6 [Solanum lycopersicum]              |
| c48537.graph_c0 | 72.063438      | 74.682554      | 95.750305      | 809.17753      | 1101.2907      | 1026.7032      | 1.859E-61 | 3.634833  | up        | hypothetical protein CARUB_v10002736mg [Capsella rubella]                                    |

| #ID             | 28 h-1<br>FPKM | 28 h-2<br>FPKM | 28 h-3<br>FPKM | 48 h-1<br>FPKM | 48 h-2<br>FPKM | 48 h-3<br>FPKM | FDR       | log2FC    | regulated | nr_annotation                                                                                                |
|-----------------|----------------|----------------|----------------|----------------|----------------|----------------|-----------|-----------|-----------|--------------------------------------------------------------------------------------------------------------|
| c48542.graph_c0 | 0.068365       | 0.4320903      | 0.0557853      | 2.9463606      | 3.4885249      | 4.1638033      | 2.449E-16 | 4.29274   | up        | PREDICTED: probable protein phosphatase 2C 60 isoform X3 [Nicotiana sylvestris]                              |
| c48543.graph_c0 | 0.0523352      | 0.1417612      | 0              | 1.3267732      | 3.4436105      | 2.1840264      | 5.06E-07  | 5.195416  | up        | -                                                                                                            |
| c48549.graph_c0 | 27.187796      | 27.00028       | 27.425394      | 13.017586      | 12.118971      | 9.5727021      | 2.132E-13 | -1.187939 | down      | dimethylaniline monooxygenase, putative [Ricinus communis]                                                   |
| c48550.graph_c0 | 95.588062      | 89.345183      | 91.200274      | 39.239551      | 40.485123      | 42.444637      | 5.274E-15 | -1.135389 | down      | PREDICTED: uncharacterized protein LOC105115870 [Sesamum indicum]                                            |
| c48550.graph_c1 | 51.922451      | 43.580675      | 45.961128      | 16.427557      | 20.52662       | 16.959632      | 2.08E-11  | -1.35243  | down      | PREDICTED: putative E3 ubiquitin-protein ligase R4 [Sesamum indicum]                                         |
| c48551.graph_c0 | 4.9572053      | 4.6223753      | 4.4274791      | 10.85353       | 9.9245888      | 8.9864704      | 1.138E-08 | 1.132331  | up        | PREDICTED: probable galactinol--sucrose galactosyltransferase 1 [Sesamum indicum]                            |
| c48556.graph_c0 | 0.2931814      | 0.6764947      | 0.6911194      | 5.2440984      | 6.824062       | 5.4009967      | 1.372E-19 | 3.433618  | up        | glyceraldehyde 3-phosphate dehydrogenase [Daucus carota]                                                     |
| c48565.graph_c0 | 9.3111237      | 6.813796       | 7.5978009      | 11.897717      | 15.225859      | 22.316377      | 0.0051388 | 1.093689  | up        | PREDICTED: shikimate O-hydroxycinnamoyltransferase-like [Sesamum indicum]                                    |
| c48566.graph_c0 | 3.5282175      | 4.0544632      | 5.3654029      | 22.361378      | 41.92265       | 20.017608      | 0.0001413 | 2.737383  | up        | predicted protein [Hordeum vulgare subsp. vulgare]                                                           |
| c48579.graph_c0 | 0              | 0              | 0.0617772      | 1.5674382      | 2.0332785      | 1.2239179      | 4.955E-20 | 6.322802  | up        | PREDICTED: thiol protease aleurain-like [Eucalyptus grandis]                                                 |
| c48591.graph_c0 | 0.0923138      | 0.062513       | 0.1883183      | 1.4334284      | 2.3552922      | 0.5986834      | 0.0024416 | 3.714671  | up        | -                                                                                                            |
| c48596.graph_c0 | 13.574151      | 14.793431      | 11.970281      | 4.9505663      | 6.3318042      | 3.1157205      | 1.396E-07 | -1.443664 | down      | PREDICTED: early nodulin-like protein 1 [Nelumbo nucifera]                                                   |
| c48605.graph_c0 | 3.8611409      | 3.6130208      | 3.4084406      | 8.2535365      | 7.3059907      | 6.1364518      | 4.586E-06 | 1.041633  | up        | PREDICTED: abietadienol/abietadienal oxidase [Sesamum indicum]                                               |
| c48610.graph_c0 | 3.727312       | 4.6991716      | 4.429033       | 1.1321724      | 1.4992492      | 1.5692195      | 1.089E-07 | -1.577108 | down      | PREDICTED: putative pentatricopeptide repeat-containing protein At2g01510 isoform X1 [Sesamum indicum]       |
| c48612.graph_c1 | 2.9392961      | 3.1132392      | 3.9205296      | 0.429897       | 1.1385594      | 0.5100264      | 5.952E-07 | -2.233223 | down      | hypothetical protein CICLE_v10018809mg [Citrus clementina]                                                   |
| c48628.graph_c2 | 212.7091       | 221.35786      | 220.5054       | 23.517419      | 45.161567      | 55.848411      | 6.339E-57 | -2.364531 | down      | PREDICTED: non-specific lipid-transfer protein-like protein At2g13820 [Sesamum indicum]                      |
| c48632.graph_c0 | 0.0345976      | 0.0624768      | 0.1693882      | 1.0963755      | 1.4866904      | 1.0535922      | 3.019E-13 | 3.807356  | up        | 26S proteasome complex ubiquitin receptor, subunit Rpn13 domain-containing protein [Rozella allomyces CSF55] |
| c48643.graph_c1 | 1.897822       | 1.8920506      | 1.8712337      | 14.684361      | 22.989344      | 33.802289      | 2.174E-07 | 3.689613  | up        | PREDICTED: fatty acid desaturase 4, chloroplastic-like [Sesamum indicum]                                     |
| c48653.graph_c0 | 14.503735      | 16.523039      | 15.445224      | 39.755766      | 42.397658      | 46.919856      | 1.393E-24 | 1.513879  | up        | PREDICTED: serine carboxypeptidase-like 7 [Sesamum indicum]                                                  |
| c48654.graph_c1 | 79.144896      | 89.350512      | 78.626956      | 28.857186      | 33.072829      | 27.96582       | 1.154E-22 | -1.417858 | down      | PREDICTED: pleiotropic drug resistance protein 3-like [Sesamum indicum]                                      |
| c48657.graph_c0 | 0.8152808      | 0.7361221      | 0.9503749      | 5.3147747      | 5.4739605      | 6.6338127      | 1.059E-11 | 2.839372  | up        | predicted protein [Physcomitrella patens]                                                                    |
| c48659.graph_c1 | 0.254498       | 0.8272362      | 0.8722068      | 5.4841141      | 7.2451049      | 4.9371404      | 3.283E-14 | 3.215931  | up        | -                                                                                                            |
| c48662.graph_c0 | 63.856872      | 63.446569      | 59.979616      | 121.84768      | 122.90377      | 134.83776      | 2.831E-13 | 1.060477  | up        | PREDICTED: chorismate synthase 1, chloroplastic [Sesamum indicum]                                            |
| c48671.graph_c0 | 29.93525       | 31.569707      | 31.564076      | 13.553813      | 14.476075      | 15.488229      | 2.959E-12 | -1.05641  | down      | PREDICTED: protein DAMAGED DNA-BINDING 2 [Sesamum indicum]                                                   |
| c48683.graph_c0 | 5.0068981      | 4.6547079      | 5.0388918      | 9.8725077      | 11.330285      | 11.77541       | 2.824E-10 | 1.20469   | up        | PREDICTED: probable ATP-dependent RNA helicase DHX35 isoform X3 [Sesamum indicum]                            |

| #ID             | 28 h-1<br>FPKM | 28 h-2<br>FPKM | 28 h-3<br>FPKM | 48 h-1<br>FPKM | 48 h-2<br>FPKM | 48 h-3<br>FPKM | FDR       | log2FC    | regulated | nr_annotation                                                                                                                                          |
|-----------------|----------------|----------------|----------------|----------------|----------------|----------------|-----------|-----------|-----------|--------------------------------------------------------------------------------------------------------------------------------------------------------|
| c48684.graph_c1 | 143.64341      | 133.91589      | 136.71196      | 481.35095      | 509.29579      | 549.64224      | 9.928E-25 | 1.934914  | up        | Beta-galactosidase 8 [Morus notabilis]                                                                                                                 |
| c48690.graph_c1 | 0.1645475      | 0.1188568      | 0.1879772      | 3.0452103      | 7.7336361      | 2.7467277      | 0.0002376 | 4.87303   | up        | PREDICTED: fruit bromelain-like [Setaria italica]                                                                                                      |
| c48700.graph_c0 | 0              | 0              | 0              | 2.2282547      | 6.9872743      | 2.9343777      | 4.53E-06  | Inf       | up        | -                                                                                                                                                      |
| c48706.graph_c0 | 6.531187       | 4.7879714      | 5.2071614      | 24.722354      | 22.650014      | 18.889049      | 2.044E-16 | 2.048776  | up        | PREDICTED: uncharacterized protein LOC105175691 [Sesamum indicum]                                                                                      |
| c48706.graph_c2 | 200.34245      | 207.71061      | 194.89753      | 403.64311      | 485.31871      | 475.06788      | 6.687E-11 | 1.216651  | up        | PREDICTED: pyruvate kinase, cytosolic isozyme-like [Sesamum indicum]                                                                                   |
| c48706.graph_c3 | 12.613392      | 8.0620079      | 9.750718       | 88.06244       | 108.4909       | 132.67976      | 3.181E-28 | 3.472044  | up        | -                                                                                                                                                      |
| c48712.graph_c0 | 13.210242      | 12.449987      | 11.461361      | 23.182188      | 27.58          | 32.771782      | 1.006E-10 | 1.207652  | up        | PREDICTED: cystinosin homolog isoform X1 [Sesamum indicum]                                                                                             |
| c48716.graph_c0 | 2.2960767      | 3.691204       | 6.3518927      | 19.024381      | 35.344745      | 18.06472       | 0.000136  | 2.587207  | up        | unknown [Lotus japonicus]                                                                                                                              |
| c48725.graph_c1 | 1.2078199      | 1.3714469      | 1.4932897      | 2.1805162      | 2.8260547      | 3.3437665      | 0.0014497 | 1.071668  | up        | PREDICTED: DNA polymerase epsilon catalytic subunit A [Sesamum indicum]                                                                                |
| c48729.graph_c0 | 0.2858001      | 0.1843219      | 0.3664737      | 1.1385711      | 1.7544408      | 1.3814915      | 1.666E-07 | 2.38792   | up        | AceriaFLZ19Wp [Saccharomycetaceae sp. &Amp;Asnbya aceri&Amp;c1]                                                                                        |
| c48734.graph_c1 | 11.38168       | 12.027953      | 10.739325      | 35.762996      | 27.058752      | 25.728567      | 3.257E-06 | 1.42319   | up        | PREDICTED: CTP synthase isoform X2 [Elaeis guineensis]                                                                                                 |
| c48739.graph_c2 | 473.57694      | 463.12952      | 448.46291      | 2796.2865      | 2121.3092      | 1830.7133      | 1.103E-08 | 2.333693  | up        | PREDICTED: calreticulin [Sesamum indicum]                                                                                                              |
| c48744.graph_c0 | 0.0595442      | 0.0537629      | 0.0809793      | 1.9623942      | 0.7729313      | 0.850677       | 0.0009413 | 4.266529  | up        | -                                                                                                                                                      |
| c48765.graph_c0 | 23.248747      | 22.03114       | 21.397145      | 57.165285      | 55.568505      | 58.214002      | 2.899E-22 | 1.400645  | up        | PREDICTED: probable galacturonosyltransferase 4 [Sesamum indicum]                                                                                      |
| c48777.graph_c0 | 16.03564       | 14.559793      | 14.587705      | 4.2702426      | 6.7555477      | 7.0926542      | 8.445E-07 | -1.284816 | down      | PREDICTED: protein notum homolog isoform X2 [Sesamum indicum]                                                                                          |
| c48794.graph_c0 | 0.5693763      | 0.8354019      | 0.4936444      | 2.0749636      | 1.481377       | 2.5286147      | 4.523E-05 | 1.72479   | up        | hypothetical protein MIMGU_mgv1a027092mg [Erythranthe guttata]                                                                                         |
| c48810.graph_c0 | 80.692829      | 83.652647      | 77.789792      | 34.803321      | 35.840372      | 38.858355      | 3.238E-14 | -1.103869 | down      | hypothetical protein MIMGU_mgv1a006553mg [Erythranthe guttata]                                                                                         |
| c48810.graph_c3 | 1.8504065      | 1.0740495      | 0.6471071      | 16.418686      | 12.069033      | 10.882399      | 1.773E-12 | 3.512629  | up        | unnamed protein product [Coffea canephora]                                                                                                             |
| c48810.graph_c4 | 48.961052      | 56.682388      | 52.391362      | 102.91905      | 103.77548      | 104.92211      | 8.562E-12 | 1.021536  | up        | PREDICTED: trifunctional UDP-glucose 4,6-dehydratase/UDP-4-keto-6-deoxy-D-glucose 3,5-epimerase/UDP-4-keto-L-rhamnose-reductase RHM1 [Sesamum indicum] |
| c48815.graph_c0 | 0.187241       | 0.2958568      | 0.6493452      | 1.7207274      | 1.7600433      | 1.214315       | 6.147E-06 | 2.094719  | up        | --                                                                                                                                                     |
| c48816.graph_c4 | 16.741913      | 15.267541      | 18.647625      | 60.826432      | 73.487121      | 78.694313      | 4.186E-45 | 2.109715  | up        | PREDICTED: uncharacterized protein LOC105168554 [Sesamum indicum]                                                                                      |
| c48822.graph_c0 | 0.123453       | 0.148622       | 0.2350522      | 1.4605344      | 3.5918514      | 1.206748       | 0.0037282 | 3.656432  | up        | hypothetical protein PNEG_01290 [Pneumocystis murina B123]                                                                                             |
| c48824.graph_c0 | 4.4469118      | 3.8074645      | 4.3793976      | 14.091971      | 11.942987      | 16.776251      | 2.777E-08 | 1.80268   | up        | hypothetical protein CICLE_v100149971mg, partial [Citrus clementina]                                                                                   |
| c48824.graph_c4 | 5.9170867      | 5.1409679      | 6.4377259      | 15.283718      | 15.641543      | 15.656054      | 3.196E-10 | 1.454056  | up        | PREDICTED: UDP-N-acetylglucosamine diphosphorylase 1 [Vitis vinifera]                                                                                  |
| c48830.graph_c0 | 0.0649516      | 0.0879679      | 0.212          | 0.9468064      | 2.4421517      | 0.8424627      | 0.005441  | 3.564652  | up        | -                                                                                                                                                      |
| c48831.graph_c0 | 7.0728035      | 8.4296235      | 7.2719009      | 23.190241      | 30.265837      | 39.514075      | 1.128E-08 | 2.064633  | up        | PREDICTED: non-specific lipid-transfer protein 1-like [Sesamum indicum]                                                                                |
| c48832.graph_c0 | 281.4677       | 254.57729      | 245.71925      | 681.57779      | 709.90704      | 812.67494      | 7.88E-13  | 1.535665  | up        | PREDICTED: aconitate hydratase, cytoplasmic [Sesamum indicum]                                                                                          |

| #ID             | 28 h-1<br>FPKM | 28 h-2<br>FPKM | 28 h-3<br>FPKM | 48 h-1<br>FPKM | 48 h-2<br>FPKM | 48 h-3<br>FPKM | FDR       | log2FC    | regulated | nr_annotation                                                                                              |
|-----------------|----------------|----------------|----------------|----------------|----------------|----------------|-----------|-----------|-----------|------------------------------------------------------------------------------------------------------------|
| c48832.graph_c2 | 55.651137      | 59.563489      | 62.701026      | 23.54742       | 20.303763      | 21.369019      | 2.524E-22 | -1.403237 | down      | PREDICTED: (+)-neomenthol dehydrogenase-like isoform X1 [Sesamum indicum]                                  |
| c48837.graph_c0 | 31.234746      | 29.947888      | 32.769383      | 13.008912      | 9.5870364      | 7.9964299      | 4.874E-16 | -1.568802 | down      | -                                                                                                          |
| c48842.graph_c0 | 14.031385      | 12.424044      | 14.517454      | 37.708873      | 26.597286      | 22.230314      | 0.0084611 | 1.129425  | up        | PREDICTED: internal alternative NAD(P)H-ubiquinone oxidoreductase A2, mitochondrial-like [Sesamum indicum] |
| c48848.graph_c0 | 6.5584999      | 6.1908791      | 5.9355022      | 24.486688      | 29.943867      | 30.059519      | 2.382E-37 | 2.21526   | up        | PREDICTED: uncharacterized protein LOC105175962 [Sesamum indicum]                                          |
| c48848.graph_c1 | 1.4345719      | 1.3201932      | 1.1705989      | 13.428373      | 12.336378      | 12.757498      | 1.889E-38 | 3.33854   | up        | PREDICTED: O-acyltransferase WSD1-like [Nicotiana tomentosiformis]                                         |
| c48850.graph_c0 | 2.0797413      | 3.487364       | 6.642746       | 22.97282       | 31.19913       | 20.709157      | 3.312E-12 | 2.654432  | up        | -                                                                                                          |
| c48853.graph_c0 | 0              | 0              | 0.1279307      | 1.2420584      | 2.7895179      | 1.2820043      | 4.279E-06 | 5.403279  | up        | -                                                                                                          |
| c48877.graph_c2 | 17.446747      | 19.451255      | 17.764555      | 41.249351      | 45.837782      | 39.098986      | 4.259E-10 | 1.248444  | up        | hypothetical protein L484_013174 [Morus notabilis]                                                         |
| c48880.graph_c0 | 0.1609717      | 0.5813695      | 0.7224339      | 8.161741       | 10.807969      | 6.6268196      | 8.221E-17 | 4.166835  | up        | predicted protein [Thalassiosira pseudonana CCMP1335]                                                      |
| c48882.graph_c1 | 10.330131      | 11.769009      | 12.951461      | 29.560302      | 22.325729      | 20.201981      | 0.0008626 | 1.088971  | up        | PREDICTED: double-stranded RNA-binding protein 2-like [Sesamum indicum]                                    |
| c48887.graph_c1 | 0.1149595      | 0.5189884      | 0.3752241      | 13.11477       | 7.8729883      | 7.3906476      | 5.723E-09 | 4.867626  | up        | PREDICTED: zinc-finger homeodomain protein 10-like [Sesamum indicum]                                       |
| c48893.graph_c3 | 4.5544568      | 6.2506162      | 2.6758077      | 17.088404      | 15.412092      | 21.780363      | 1.642E-07 | 2.051786  | up        | PREDICTED: UDP-glucuronate 4-epimerase 6 [Sesamum indicum]                                                 |
| c48903.graph_c0 | 12.263015      | 13.321425      | 14.196751      | 2.9631274      | 3.087614       | 3.0255755      | 1.006E-14 | -2.090526 | down      | PREDICTED: phosphoenolpyruvate carboxylase kinase 2 [Sesamum indicum]                                      |
| c48913.graph_c0 | 0.0440523      | 0              | 0              | 3.2945295      | 5.6788954      | 3.6270514      | 4.045E-20 | 8.195546  | up        | -                                                                                                          |
| c48922.graph_c1 | 1.7294036      | 2.802673       | 2.7499902      | 13.827385      | 32.333746      | 13.253796      | 0.0018933 | 3.060346  | up        | -                                                                                                          |
| c48944.graph_c0 | 0              | 0.0343525      | 0              | 2.652477       | 6.181951       | 6.5226186      | 1.879E-13 | 8.836943  | up        | hypothetical protein M378DRAFT_109196 [Amanita muscaria Koide BX008]                                       |
| c48950.graph_c2 | 3.9381572      | 3.9137519      | 4.248727       | 10.050814      | 14.054857      | 12.699279      | 1.902E-13 | 1.641309  | up        | hypothetical protein MIMGU_mgv1a004080mg [Erythranthe guttata]                                             |
| c48953.graph_c1 | 1.6082892      | 1.136453       | 1.8544088      | 7.3124592      | 9.6246429      | 12.106186      | 5.359E-13 | 2.693187  | up        | PREDICTED: protein ECERIFERUM 1-like [Sesamum indicum]                                                     |
| c48957.graph_c1 | 0.9465699      | 1.5668837      | 2.1884477      | 7.7990058      | 20.549328      | 8.7188697      | 0.0044961 | 3.008059  | up        | PREDICTED: adenosylhomocysteinase-like [Phoenix dactylifera]                                               |
| c48957.graph_c2 | 616.14003      | 617.11856      | 611.33848      | 1167.7898      | 1252.9252      | 1515.8613      | 5.419E-07 | 1.132777  | up        | PREDICTED: uncharacterized protein LOC105169354 [Sesamum indicum]                                          |
| c48972.graph_c0 | 2.1827798      | 1.9189812      | 1.945182       | 5.6064798      | 4.3581206      | 4.7942505      | 4.919E-05 | 1.333682  | up        | PREDICTED: subtilisin-like protease SB13.5 isoform X2 [Sesamum indicum]                                    |
| c48982.graph_c0 | 0.1073369      | 0.0969152      | 0.2627581      | 1.496632       | 5.1889094      | 1.755415       | 0.007858  | 4.200716  | up        | -                                                                                                          |
| c48988.graph_c0 | 3.0118486      | 5.3551594      | 6.9570226      | 35.475614      | 60.542044      | 28.900648      | 1.209E-05 | 3.063317  | up        | -                                                                                                          |
| c49003.graph_c0 | 5.0809553      | 4.358245       | 5.5971244      | 0.9660728      | 2.2174467      | 1.0028734      | 5.932E-05 | -1.813181 | down      | -                                                                                                          |
| c49008.graph_c0 | 1.9558511      | 1.9761824      | 1.6339576      | 0.6493105      | 0.500266       | 0.6302755      | 0.0004796 | -1.599354 | down      | PREDICTED: uncharacterized protein LOC105161665 [Sesamum indicum]                                          |
| c49011.graph_c0 | 22.084289      | 23.08847       | 23.026321      | 7.5304051      | 9.0181012      | 15.148977      | 2.961E-05 | -1.071059 | down      | PREDICTED: uncharacterized protein LOC105176842 [Sesamum indicum]                                          |
| c49016.graph_c0 | 0.1207309      | 0.2616208      | 0.2955462      | 0.6427481      | 0.9403094      | 0.5991474      | 0.0001542 | 1.724412  | up        | unknown [Picea sitchensis]                                                                                 |

| #ID             | 28 h-1<br>FPKM | 28 h-2<br>FPKM | 28 h-3<br>FPKM | 48 h-1<br>FPKM | 48 h-2<br>FPKM | 48 h-3<br>FPKM | FDR       | log2FC    | regulated | nr_annotation                                                                                                          |
|-----------------|----------------|----------------|----------------|----------------|----------------|----------------|-----------|-----------|-----------|------------------------------------------------------------------------------------------------------------------------|
| c49018.graph_c2 | 84.506501      | 76.125662      | 74.179246      | 155.84196      | 166.37015      | 160.4335       | 4.981E-11 | 1.080685  | up        | 1-deoxy-D-xylulose-5-phosphate synthase [Andrographis paniculata]                                                      |
| c49019.graph_c0 | 0.3226902      | 0.1165436      | 0.5002939      | 1.3498108      | 1.3866287      | 1.2010535      | 3.27E-06  | 2.10805   | up        | hypothetical protein HMPREF1120_05211 [Exophiala dermatitidis NIH/UT8656]                                              |
| c49022.graph_c0 | 72.755323      | 65.307735      | 65.035412      | 197.5568       | 166.8462       | 139.60214      | 1.094E-06 | 1.358427  | up        | PREDICTED: uncharacterized protein LOC105176567 [Sesamum indicum]                                                      |
| c49029.graph_c0 | 0.2298704      | 0.6226543      | 0.6002316      | 1.748266       | 2.7781137      | 1.3481837      | 0.0010339 | 2.053716  | up        | ras-related c3 botulinum toxin substrate 1 (rhosmall gtp binding protein rac1) [Lichtheimia corymbifera JMRC:FSU:9682] |
| c49030.graph_c2 | 589.91819      | 636.89353      | 681.80081      | 60.992358      | 56.654904      | 48.513615      | 2.405E-70 | -3.477046 | down      | PREDICTED: probable xyloglucan endotransglucosylase/hydrolase protein 28 [Sesamum indicum]                             |
| c49038.graph_c1 | 18.909995      | 21.463143      | 16.303072      | 1.6637144      | 2.4152828      | 2.302787       | 6.673E-28 | -3.114657 | down      | PREDICTED: E3 ubiquitin-protein ligase KING1-like [Sesamum indicum]                                                    |
| c49050.graph_c0 | 0.0599908      | 0.0812492      | 0.0734281      | 1.7109633      | 4.2695815      | 1.1164303      | 0.0014635 | 5.07942   | up        | PREDICTED: CBS domain-containing protein CBSX3, mitochondrial-like [Pyrus x bretschneideri]                            |
| c49054.graph_c0 | 0              | 0.0660967      | 0.0597342      | 1.9486306      | 3.8337702      | 5.0365079      | 3.914E-10 | 6.454858  | up        | short chain dehydrogenase, putative [Ricinus communis]                                                                 |
| c49059.graph_c4 | 2.3446039      | 2.0581531      | 1.9663214      | 0.1651088      | 0.8745637      | 0.734564       | 9.806E-05 | -1.823483 | down      | -                                                                                                                      |
| c49060.graph_c0 | 10.774822      | 10.70625       | 10.345402      | 3.1433047      | 4.6900707      | 5.8301444      | 1.896E-09 | -1.186599 | down      | PREDICTED: uncharacterized protein LOC105172576 [Sesamum indicum]                                                      |
| c49060.graph_c4 | 7.5726277      | 6.8681718      | 6.3462079      | 2.8969543      | 3.1605829      | 3.6164641      | 0.0007755 | -1.064053 | down      | PREDICTED: F-box protein SKP28-like isoform X1 [Sesamum indicum]                                                       |
| c49060.graph_c5 | 5.1119694      | 5.0517515      | 5.5508187      | 2.1939472      | 2.3782727      | 2.7239457      | 0.0035843 | -1.067639 | down      | PREDICTED: uncharacterized protein At1g15400-like [Sesamum indicum]                                                    |
| c49078.graph_c4 | 7.9052787      | 7.6257751      | 7.4798053      | 17.700069      | 19.991068      | 21.617342      | 4.633E-17 | 1.405099  | up        | PREDICTED: reticulon-like protein B2 [Sesamum indicum]                                                                 |
| c49081.graph_c0 | 0.0783064      | 0.1237308      | 0.2236407      | 1.4640712      | 2.8391295      | 1.1040015      | 0.000187  | 3.701158  | up        | S-methyl-5'-thioadenosine phosphorylase [Galdieria sulphuraria]                                                        |
| c49084.graph_c0 | 1.7318556      | 2.1615898      | 1.7872571      | 6.1337995      | 6.566417       | 5.4003672      | 6.083E-06 | 1.714602  | up        | PREDICTED: uncharacterized protein LOC105175906 [Sesamum indicum]                                                      |
| c49085.graph_c0 | 56.000826      | 53.774614      | 51.941857      | 20.22081       | 20.383298      | 20.579302      | 1.142E-20 | -1.360296 | down      | -                                                                                                                      |
| c49091.graph_c0 | 0.4618867      | 0.6950673      | 0.544405       | 2.4069545      | 3.5146945      | 2.1995773      | 3.157E-07 | 2.293662  | up        | -                                                                                                                      |
| c49105.graph_c0 | 1.6073543      | 2.9025804      | 3.1852851      | 13.971017      | 17.678492      | 32.373246      | 9.076E-05 | 3.089027  | up        | predicted protein [Micromonas sp. RCC299]                                                                              |
| c49119.graph_c1 | 112.17069      | 120.81623      | 128.44748      | 42.636681      | 40.942112      | 38.603439      | 3.624E-26 | -1.521358 | down      | PREDICTED: cyclicin-2-like isoform X3 [Nicotiana glauca]                                                               |
| c49121.graph_c0 | 13.725263      | 16.523501      | 15.70533       | 89.188631      | 127.53294      | 125.97877      | 5.52E-28  | 2.934362  | up        | PREDICTED: uncharacterized protein LOC105160017 [Sesamum indicum]                                                      |
| c49130.graph_c0 | 12.755172      | 11.142805      | 12.908767      | 31.04139       | 28.139124      | 30.858916      | 3.407E-17 | 1.333625  | up        | PREDICTED: uncharacterized protein LOC104215445 [Nicotiana glauca]                                                     |
| c49138.graph_c0 | 0.1307294      | 0.2754183      | 0.2844643      | 2.0989826      | 3.74504        | 2.2608541      | 7.753E-09 | 3.587523  | up        | -                                                                                                                      |
| c49138.graph_c1 | 167.42188      | 174.37579      | 175.50365      | 67.872665      | 75.704688      | 74.888962      | 2.032E-15 | -1.203499 | down      | PREDICTED: uncharacterized protein LOC105179211 isoform X1 [Sesamum indicum]                                           |
| c49142.graph_c0 | 664.08624      | 672.32928      | 650.4535       | 1589.6451      | 1313.0092      | 1084.5725      | 0.0002662 | 1.052674  | up        | PREDICTED: 4-coumarate--CoA ligase-like 7 [Sesamum indicum]                                                            |
| c49145.graph_c0 | 0.1106727      | 0.239825       | 0.2348008      | 1.0100577      | 1.4861578      | 0.7988829      | 3.648E-06 | 2.532015  | up        | hypothetical protein SELMODRAFT_166421 [Selaginella moellendorffii]                                                    |
| c49148.graph_c0 | 0              | 0.0493357      | 0              | 1.5930151      | 1.3207354      | 1.6023408      | 2.521E-19 | 6.565202  | up        | --                                                                                                                     |
| c49150.graph_c0 | 0              | 0              | 0              | 1.3468224      | 1.5694745      | 1.3781536      | 1.077E-20 | Inf       | up        | predicted protein [Physcomitrella patens]                                                                              |

| #ID             | 28 h-1<br>FPKM | 28 h-2<br>FPKM | 28 h-3<br>FPKM | 48 h-1<br>FPKM | 48 h-2<br>FPKM | 48 h-3<br>FPKM | FDR       | log2FC    | regulated | nr_annotation                                                                      |
|-----------------|----------------|----------------|----------------|----------------|----------------|----------------|-----------|-----------|-----------|------------------------------------------------------------------------------------|
| c49157.graph_c4 | 11.520129      | 11.592619      | 11.337804      | 3.1769041      | 4.0740804      | 4.9096882      | 5.376E-07 | -1.466293 | down      | MYB-related transcription factor [Salvia miltiorrhiza]                             |
| c49158.graph_c0 | 3.5954668      | 5.8807184      | 5.0020106      | 22.899665      | 42.938775      | 22.835728      | 3.334E-05 | 2.649484  | up        | S-adenosyl-methionine synthetase [Undaria pinnatifida]                             |
| c49160.graph_c3 | 3.1114263      | 1.6053293      | 1.4961366      | 5.9863708      | 6.5656634      | 8.6479515      | 4.813E-07 | 1.808879  | up        | PREDICTED: dof zinc finger protein DOF1.4-like [Sesamum indicum]                   |
| c49168.graph_c0 | 17.452827      | 17.911471      | 17.758463      | 82.982682      | 99.699435      | 146.61902      | 5.68E-09  | 2.667441  | up        | PREDICTED: kinesin-like protein NACK1 [Sesamum indicum]                            |
| c49172.graph_c1 | 1.9891968      | 2.1809279      | 2.2801651      | 9.0652257      | 11.765887      | 8.0661833      | 2.546E-11 | 2.203324  | up        | predicted protein [Hordeum vulgare subsp. vulgare]                                 |
| c49172.graph_c2 | 0.7424256      | 0.7541333      | 1.3630798      | 5.5288402      | 6.7294752      | 4.0821622      | 1.927E-08 | 2.555426  | up        | heat shock protein S [Schizosaccharomyces japonicus yFS275]                        |
| c49177.graph_c0 | 4.4303876      | 5.8336609      | 6.577583       | 20.903414      | 33.960612      | 26.511559      | 1.781E-11 | 2.307286  | up        | 40S ribosomal protein S12 [Blumeria graminis f. sp. hordei DH14]                   |
| c49183.graph_c0 | 1.3816656      | 1.2812311      | 1.9806165      | 0.4733413      | 0.5515925      | 0.7581173      | 0.0030078 | -1.345112 | down      | -                                                                                  |
| c49185.graph_c0 | 5.239263       | 7.3284955      | 8.4803064      | 30.429539      | 50.171152      | 26.688529      | 1.946E-05 | 2.386319  | up        | hypothetical protein CHLNCDRAFT_59606 [Chlorella variabilis]                       |
| c49217.graph_c0 | 0.1028234      | 0.0464199      | 0.2097575      | 2.4112192      | 4.5564872      | 1.3916681      | 0.0002943 | 4.575769  | up        | conserved unknown protein [Ectocarpus siliculosus]                                 |
| c49225.graph_c0 | 0.2638197      | 0.3970075      | 0.5023078      | 1.2261735      | 1.9484733      | 1.041449       | 0.000423  | 1.894929  | up        | PREDICTED: V-type proton ATPase subunit E3 [Tarenaya hassleriana]                  |
| c49233.graph_c4 | 141.8109       | 138.75231      | 141.96422      | 44.160044      | 56.396961      | 56.770441      | 3.218E-19 | -1.387851 | down      | -                                                                                  |
| c49236.graph_c1 | 11.747795      | 12.062291      | 13.081399      | 31.395155      | 33.430213      | 37.215071      | 6.32E-18  | 1.507632  | up        | PREDICTED: kinesin KP1-like isoform X2 [Sesamum indicum]                           |
| c49245.graph_c1 | 1.1667739      | 2.3703466      | 1.1900974      | 6.7478088      | 4.1617893      | 4.8115526      | 0.0002102 | 1.785638  | up        | PREDICTED: protein PLANT CADMIUM RESISTANCE 6 [Sesamum indicum]                    |
| c49246.graph_c0 | 9.6756844      | 8.7690789      | 8.9143444      | 21.901148      | 24.553002      | 22.961073      | 2.302E-21 | 1.383686  | up        | PREDICTED: uncharacterized protein LOC105164785 isoform X2 [Sesamum indicum]       |
| c49248.graph_c0 | 0.0347238      | 0              | 0              | 2.7289287      | 5.595424       | 4.5038903      | 6.019E-19 | 8.560613  | up        | -                                                                                  |
| c49251.graph_c0 | 0              | 0.0284767      | 0.0772066      | 1.1993379      | 5.0398605      | 2.9524861      | 2.688E-05 | 6.463153  | up        | -                                                                                  |
| c49260.graph_c1 | 1.0618808      | 0.7190841      | 1.5163506      | 15.815643      | 14.972335      | 9.8808065      | 3.561E-12 | 3.669956  | up        | predicted protein [Physcomitrella patens]                                          |
| c49268.graph_c1 | 25.652429      | 21.376026      | 21.691616      | 172.24076      | 184.57721      | 188.75238      | 1.424E-90 | 3.029563  | up        | PREDICTED: auxin-responsive protein IAA14 [Sesamum indicum]                        |
| c49270.graph_c0 | 27.165794      | 25.109257      | 24.461164      | 61.226689      | 50.534336      | 47.258552      | 8.238E-07 | 1.097934  | up        | PREDICTED: ultraviolet-B receptor UVK8 isoform X2 [Sesamum indicum]                |
| c49287.graph_c0 | 52.127831      | 77.731111      | 69.926416      | 7.7589084      | 5.5681315      | 6.4584217      | 2.89E-20  | -3.288253 | down      | PREDICTED: peroxygenase-like [Solanum lycopersicum]                                |
| c49287.graph_c1 | 59.258925      | 66.413318      | 67.905485      | 19.129358      | 21.031276      | 22.187986      | 2.799E-28 | -1.594687 | down      | PREDICTED: probable helicase DDB_G0274399 isoform X1 [Sesamum indicum]             |
| c49292.graph_c0 | 0.1253075      | 0.4148499      | 0.2726663      | 1.3501096      | 1.7387687      | 0.6124374      | 0.00659   | 2.231596  | up        | phosphoenolpyruvate carboxykinase [Neocallimastix frontalis]                       |
| c49295.graph_c0 | 0.1042338      | 0.3137111      | 0.4819722      | 2.3782319      | 4.0124547      | 2.7823275      | 9.642E-12 | 3.383514  | up        | unknown [Picea sitchensis]                                                         |
| c49297.graph_c0 | 3.2125378      | 2.4655273      | 1.9005183      | 0.7126224      | 0.9706334      | 0.2717516      | 5.878E-05 | -1.910752 | down      | -                                                                                  |
| c49307.graph_c0 | 322.88959      | 308.70899      | 295.22631      | 1648.3562      | 1087.8131      | 791.56508      | 0.0021175 | 1.982148  | up        | PREDICTED: pentatricopeptide repeat-containing protein At3g21470 [Sesamum indicum] |
| c49309.graph_c0 | 0              | 0.0595667      | 0.0538328      | 1.2543698      | 1.3288527      | 0.930109       | 6.298E-17 | 4.997242  | up        | hypothetical protein EMIHU DRAFT_452099 [Emilia huxleyi CCMP1516]                  |

| #ID             | 28 h-1<br>FPKM | 28 h-2<br>FPKM | 28 h-3<br>FPKM | 48 h-1<br>FPKM | 48 h-2<br>FPKM | 48 h-3<br>FPKM | FDR       | log2FC    | regulated | nr_annotation                                                                                      |
|-----------------|----------------|----------------|----------------|----------------|----------------|----------------|-----------|-----------|-----------|----------------------------------------------------------------------------------------------------|
| c49311.graph_c0 | 0.0591066      | 0.160103       | 0.1929219      | 2.0978135      | 2.3811204      | 1.9999519      | 3.89E-16  | 4.015139  | up        | glucokinase [Galdieria sulphuraria]                                                                |
| c49315.graph_c0 | 0.805624       | 0.8313176      | 1.5025887      | 3.355331       | 4.8682104      | 2.7908433      | 6.805E-05 | 1.848541  | up        | PREDICTED: T-complex protein 1 subunit beta [Phoenix dactylifera]                                  |
| c49316.graph_c1 | 0.0539336      | 0              | 0.0880187      | 3.0764144      | 3.7660573      | 3.7106639      | 7.322E-23 | 6.251459  | up        | hypothetical protein MG5_02709 [Candida albicans P57072]                                           |
| c49327.graph_c0 | 90.606697      | 98.602149      | 86.079387      | 26.787054      | 28.674956      | 25.499799      | 7.701E-33 | -1.72363  | down      | PREDICTED: chromodomain-helicase-DNA-binding protein 4-like isoform X4 [Sesamum indicum]           |
| c49340.graph_c0 | 27.493075      | 26.282059      | 28.070698      | 131.25192      | 91.374071      | 93.879364      | 1.352E-07 | 2.000531  | up        | PREDICTED: uncharacterized protein LOC104156/4 [Camelina sativa]                                   |
| c49353.graph_c2 | 12.899002      | 12.894438      | 13.576985      | 30.63989       | 34.788163      | 37.685553      | 1.152E-20 | 1.427986  | up        | PREDICTED: chloroplast stem-loop binding protein of 41 kDa b, chloroplastic [Nicotiana sylvestris] |
| c49355.graph_c1 | 191.72673      | 188.89941      | 177.55179      | 547.27569      | 929.49289      | 1206.2138      | 2.783E-05 | 2.296126  | up        | PREDICTED: (RS)-norcochlorine 6-O-methyltransferase-like [Sesamum indicum]                         |
| c49355.graph_c3 | 564.60556      | 571.8276       | 523.22707      | 1079.8654      | 1906.0428      | 2365.7357      | 0.0004882 | 1.719961  | up        | PREDICTED: (RS)-norcochlorine 6-O-methyltransferase-like [Sesamum indicum]                         |
| c49370.graph_c2 | 0.1900827      | 0.3432537      | 0.1163295      | 1.9877867      | 2.0420063      | 1.7151231      | 3.318E-11 | 3.189291  | up        | hypothetical protein M569_09445 [Genlisea aurea]                                                   |
| c49372.graph_c0 | 3.4253245      | 5.5397553      | 8.0165341      | 28.198175      | 49.484305      | 25.897201      | 2.414E-05 | 2.643738  | up        | small subunit ribosomal protein S6e, cytoplasmic [Guillardia theta CCMP2712]                       |
| c49380.graph_c0 | 11.525844      | 9.7831305      | 12.680891      | 2.3528982      | 3.0722871      | 3.943748       | 1.036E-09 | -1.824408 | down      | PREDICTED: uncharacterized protein LOC10516/081 [Sesamum indicum]                                  |
| c49380.graph_c1 | 56.531022      | 52.902865      | 53.059542      | 15.531617      | 13.910995      | 14.856435      | 6.823E-35 | -1.831273 | down      | PREDICTED: sedoheptulose-1,7-bisphosphatase, chloroplastic [Sesamum indicum]                       |
| c49380.graph_c2 | 8.3972857      | 6.3261114      | 7.7753313      | 185.12186      | 210.0805       | 234.24939      | 1.78E-150 | 4.844674  | up        | PREDICTED: gamma-cadinene synthase-like [Sesamum indicum]                                          |
| c49382.graph_c1 | 0.2752739      | 0.7456396      | 0.8610481      | 5.4084141      | 9.2412241      | 5.1745961      | 3.284E-08 | 3.432526  | up        | -                                                                                                  |
| c49384.graph_c0 | 0.034373       | 0.2172494      | 0.1402406      | 2.1349474      | 2.2617179      | 1.395671       | 3.372E-13 | 3.931282  | up        | -                                                                                                  |
| c49388.graph_c1 | 55.228102      | 57.819905      | 56.91689       | 193.5146       | 143.98965      | 151.76831      | 1.96E-08  | 1.573145  | up        | PREDICTED: zinc finger BED domain-containing protein DAYSLEEPER [Sesamum indicum]                  |
| c49395.graph_c0 | 0.7619708      | 1.0438441      | 1.3721642      | 3.5636685      | 4.4103675      | 1.8966315      | 0.0069885 | 1.678125  | up        | -                                                                                                  |
| c49402.graph_c0 | 3.6814651      | 2.465002       | 3.7466185      | 6.5016796      | 7.4987505      | 9.144278       | 5.684E-05 | 1.263304  | up        | Pollen-specific SF21 [Gossypium arboreum]                                                          |
| c49402.graph_c1 | 0.6253034      | 0.4362743      | 0.5102425      | 1.9815452      | 2.2900439      | 2.2760883      | 4.987E-07 | 2.09775   | up        | PREDICTED: uncharacterized protein LOC10517/5599 [Sesamum indicum]                                 |
| c49405.graph_c0 | 135.30151      | 137.53852      | 132.68974      | 32.005402      | 53.276617      | 52.871343      | 3.468E-24 | -1.520418 | down      | hypothetical protein MIMGU_mgv1a009036mg [Erythranthe guttata]                                     |
| c49416.graph_c0 | 0.115355       | 0.5207737      | 0.2196337      | 8.2371133      | 20.343975      | 5.3777361      | 0.0006075 | 5.344466  | up        | --                                                                                                 |
| c49428.graph_c3 | 268.21796      | 244.75478      | 266.13085      | 575.84028      | 739.46722      | 697.1664       | 3.407E-14 | 1.406812  | up        | PREDICTED: serine carboxypeptidase-like [Sesamum indicum]                                          |
| c49429.graph_c1 | 593.31503      | 558.2572       | 585.76326      | 276.80039      | 272.61826      | 249.34194      | 2.073E-11 | -1.077908 | down      | hypothetical protein VITISV_037044 [Vitis vinifera]                                                |
| c49431.graph_c0 | 21.638391      | 19.826388      | 20.529236      | 40.845944      | 37.453332      | 42.619381      | 6.604E-12 | 1.006487  | up        | PREDICTED: biotin synthase [Sesamum indicum]                                                       |
| c49433.graph_c0 | 0.1790654      | 0.3233585      | 0.2557028      | 1.418616       | 1.3826235      | 1.0603118      | 1.901E-07 | 2.393915  | up        | serine/threonine-protein phosphatase pp2a catalytic subunit [Grosmania clavigera kw1407]           |



| #ID             | 28 h-1<br>FPKM | 28 h-2<br>FPKM | 28 h-3<br>FPKM | 48 h-1<br>FPKM | 48 h-2<br>FPKM | 48 h-3<br>FPKM | FDR       | log2FC    | regulated | nr_annotation                                                                                                                         |
|-----------------|----------------|----------------|----------------|----------------|----------------|----------------|-----------|-----------|-----------|---------------------------------------------------------------------------------------------------------------------------------------|
| c49437.graph_c1 | 0.3443468      | 0.5652961      | 0.9195846      | 3.4521991      | 5.0023583      | 3.0011311      | 9.507E-09 | 2.684352  | up        | hypothetical protein MIMGU_mgv1a008893mg [Erythranthe guttata]<br>PREDICTED: ABC transporter B family member 4-like [Sesamum indicum] |
| c49438.graph_c0 | 5.6056923      | 4.6075645      | 4.5296163      | 2.0915201      | 1.892893       | 2.3293587      | 1.605E-07 | -1.181175 | down      | unnamed protein product [Chondrus crispus]                                                                                            |
| c49441.graph_c0 | 0.1040478      | 0.1878907      | 0.0849021      | 1.3628446      | 2.0026468      | 3.0511862      | 1.081E-07 | 4.12309   | up        | PREDICTED: protein DA1-related 2 isoform X2 [Sesamum indicum]                                                                         |
| c49449.graph_c0 | 2.1476985      | 1.9737984      | 2.472283       | 14.486876      | 18.128105      | 14.707094      | 7.609E-28 | 2.882405  | up        | Rop guanine nucleotide exchange factor 1 [Morus notabilis]                                                                            |
| c49452.graph_c0 | 5.8053613      | 5.0812368      | 5.1238317      | 16.857483      | 18.653936      | 20.879297      | 1.707E-21 | 1.855676  | up        | NADH-malate dehydrogenase [Pyropia haitanensis]                                                                                       |
| c49454.graph_c0 | 0.3200258      | 0.2311626      | 0.3655938      | 2.1094126      | 1.890872       | 1.5159922      | 1.551E-08 | 2.634568  | up        | acetyl-CoA C-acyltransferase-like protein [Zea mays]                                                                                  |
| c49460.graph_c0 | 0.1590147      | 0.0574301      | 0.5449696      | 1.2093769      | 0.939538       | 1.0043565      | 1.611E-05 | 2.093514  | up        | Molecular chaperones GRP78/BiP/KAR2, HSP70 superfamily [Ectocarpus siliculosus]                                                       |
| c49463.graph_c0 | 0.6239366      | 1.0915027      | 1.1455361      | 4.5970225      | 6.126759       | 4.2223515      | 5.191E-10 | 2.424406  | up        | hypothetical protein CHLNCDRAFT_144079 [Chlorella variabilis]                                                                         |
| c49470.graph_c0 | 0              | 0.3548282      | 0.3206722      | 1.7790603      | 1.8846986      | 1.4563574      | 9.032E-10 | 2.965299  | up        | PREDICTED: pyruvate decarboxylase 1 [Sesamum indicum]                                                                                 |
| c49474.graph_c0 | 215.38356      | 220.83253      | 218.13818      | 1556.7774      | 1059.6723      | 812.50519      | 6.974E-05 | 2.442212  | up        | PREDICTED: uncharacterized protein LOC105170638 isoform X1 [Sesamum indicum]                                                          |
| c49474.graph_c6 | 5.5302634      | 5.3973921      | 5.3212749      | 14.870959      | 13.993997      | 11.573572      | 3.305E-09 | 1.360389  | up        | hypothetical protein SELMODRAFT_144212 [Selaginella moellendorffii]                                                                   |
| c49477.graph_c0 | 0.6435137      | 1.7154295      | 2.0003884      | 8.856183       | 8.6413637      | 9.0552927      | 1.277E-18 | 2.648475  | up        | hypothetical protein PISMODRAFT_61145 [Pisonotus microcarpus]                                                                         |
| c49479.graph_c0 | 4.2910658      | 7.5789291      | 9.613698       | 33.112578      | 56.510166      | 21.609304      | 0.0030884 | 2.409505  | up        | hypothetical protein JCGZ_17423 [Jatropha curcas]                                                                                     |
| c49480.graph_c0 | 0.5404276      | 0.2439777      | 0.5354812      | 1.8104412      | 2.6954874      | 1.4367662      | 3.233E-05 | 2.208442  | up        | predicted protein [Physcomitrella patens]                                                                                             |
| c49485.graph_c0 | 0.0246992      | 0.1338061      | 0.0201543      | 3.0368752      | 4.1127106      | 5.7943939      | 5.118E-18 | 6.215811  | up        | TPR1 [Medicago sativa]                                                                                                                |
| c49492.graph_c1 | 0.211931       | 0.2296246      | 0.3804547      | 1.0745526      | 1.8213731      | 1.1473565      | 2.535E-06 | 2.332836  | up        | PREDICTED: uncharacterized protein LOC102585254 [Solanum tuberosum]                                                                   |
| c49499.graph_c0 | 0              | 0.0318807      | 0              | 0.5594594      | 0.6400938      | 0.6969251      | 2.832E-19 | 5.93814   | up        | PREDICTED: tyrosine/DOPA decarboxylase 1-like [Sesamum indicum]                                                                       |
| c49500.graph_c8 | 9.3871897      | 14.750859      | 10.081886      | 3.64004        | 6.2541423      | 5.7156807      | 0.0023453 | -1.098655 | down      | hypothetical protein MIMGU_mgv1a019874mg [Erythranthe guttata]                                                                        |
| c49500.graph_c9 | 16.665023      | 15.868549      | 20.323533      | 4.0534628      | 4.363976       | 2.8736682      | 4.824E-23 | -2.18341  | down      | hypothetical protein MIMGU_mgv1a004264mg [Erythranthe guttata]                                                                        |
| c49511.graph_c1 | 10.021379      | 9.6046173      | 10.121163      | 28.269015      | 30.830028      | 34.835188      | 4.219E-21 | 1.698232  | up        | -                                                                                                                                     |
| c49513.graph_c1 | 0.0421641      | 0.0951755      | 0.0688111      | 6.8945453      | 9.7951993      | 11.342108      | 5.145E-40 | 7.122345  | up        | predicted protein [Hordeum vulgare subsp. vulgare]                                                                                    |
| c49522.graph_c0 | 0.3841664      | 0.2312442      | 0.2438152      | 1.406771       | 2.1208162      | 1.2517364      | 1.593E-07 | 2.513678  | up        | PREDICTED: WAT1-related protein At1g21890-like [Sesamum indicum]                                                                      |
| c49528.graph_c1 | 0.6678207      | 1.3329021      | 1.5487662      | 9.0888653      | 8.2125874      | 11.258676      | 3.927E-22 | 3.049131  | up        | Rotamase cyclophilin 2 [Theobroma cacao]                                                                                              |
| c49533.graph_c0 | 1.3415854      | 2.0401277      | 2.7079983      | 7.6972637      | 11.852206      | 10.830944      | 2.917E-10 | 2.352971  | up        | --                                                                                                                                    |
| c49540.graph_c0 | 0.2637458      | 0.4365859      | 1.1836795      | 4.0118073      | 8.9722715      | 3.2722085      | 0.0037987 | 3.140141  | up        | PREDICTED: CBL-interacting serine/threonine-protein kinase 1-like [Sesamum indicum]                                                   |
| c49541.graph_c1 | 5.6032091      | 5.3925288      | 4.5367296      | 10.240785      | 10.469743      | 9.7490627      | 1.465E-06 | 1.014209  | up        | phenylpropanal double-bond reductase [Pinus pinaster]                                                                                 |
| c49544.graph_c0 | 0.2079066      | 0.1564334      | 0.3675751      | 4.260513       | 3.8155335      | 5.7450917      | 2.974E-22 | 4.278023  | up        | PREDICTED: uncharacterized protein LOC105168432 [Sesamum indicum]                                                                     |
| c49549.graph_c0 | 16.11083       | 17.089443      | 15.775567      | 6.1109101      | 7.4646512      | 6.0616483      | 5.21E-17  | -1.278445 | down      |                                                                                                                                       |

| #ID             | 28 h-1<br>FPKM | 28 h-2<br>FPKM | 28 h-3<br>FPKM | 48 h-1<br>FPKM | 48 h-2<br>FPKM | 48 h-3<br>FPKM | FDR       | log2FC    | regulated | nr_annotation                                                                                 |
|-----------------|----------------|----------------|----------------|----------------|----------------|----------------|-----------|-----------|-----------|-----------------------------------------------------------------------------------------------|
| c49552.graph_c0 | 3.8556682      | 5.7517244      | 6.9079472      | 22.152415      | 50.143425      | 19.002054      | 0.0097711 | 2.499141  | up        | predicted protein [Physcomitrella patens]                                                     |
| c49554.graph_c0 | 4.3867773      | 3.3435735      | 3.7887704      | 7.1854033      | 9.9071581      | 12.240876      | 1.228E-05 | 1.382908  | up        | PREDICTED: uncharacterized protein At4g17910 isoform X1 [Sesamum indicum]                     |
| c49555.graph_c0 | 0.0218706      | 0.1777237      | 0.3212317      | 1.386128       | 1.6446467      | 0.5673495      | 0.0021717 | 2.832471  | up        | acid protease, partial [Dacryopinax sp. DJM-731 SS1]                                          |
| c49557.graph_c0 | 0.4321843      | 0.5017139      | 0.6549379      | 1.0173901      | 2.0174233      | 1.2534475      | 0.0042355 | 1.464808  | up        | heat shock protein SSA1 [Spathaspora passalidarum NRRL Y-27907]                               |
| c49562.graph_c0 | 0.0232452      | 0.0209883      | 0.0758717      | 0.7660911      | 1.3734441      | 0.7865345      | 1.55E-09  | 4.639254  | up        | predicted protein, partial [Ostreococcus lucimarinus CCE9901]                                 |
| c49563.graph_c0 | 28.500618      | 32.13535       | 28.701642      | 11.983468      | 14.001873      | 15.994227      | 3.922E-06 | -1.051342 | down      | -                                                                                             |
| c49567.graph_c0 | 8.6262233      | 13.753229      | 19.075756      | 28.169222      | 31.521288      | 23.220208      | 0.001194  | 1.041634  | up        | predicted protein [Hordeum vulgare subsp. vulgare]                                            |
| c49575.graph_c0 | 0.0784426      | 0.0141653      | 0.0128017      | 1.034091       | 2.1067194      | 0.9378228      | 3.223E-07 | 5.308255  | up        | --                                                                                            |
| c49579.graph_c0 | 0.0246234      | 0.2445583      | 0.2009245      | 4.9939056      | 7.3735472      | 3.5270656      | 3.575E-11 | 5.119237  | up        | hypothetical protein GUITHDRAFT_78647, partial [Guillardia theta CCMP2712]                    |
| c49585.graph_c0 | 3.278834       | 5.0183742      | 7.2108036      | 25.899995      | 40.002425      | 21.647587      | 2.737E-06 | 2.534338  | up        | 60S ribosomal protein L5 [Rozella allomyces CSF55]                                            |
| c49603.graph_c0 | 156.77878      | 163.04316      | 164.72789      | 74.71413       | 80.009374      | 78.742867      | 2.129E-10 | -1.012516 | down      | PREDICTED: GRIP and coiled-coil domain-containing protein 2-like [Sesamum indicum]            |
| c49614.graph_c1 | 0.5037904      | 0.4548755      | 0.462475       | 3.1131333      | 4.904699       | 1.9177251      | 0.0004408 | 2.844774  | up        | -                                                                                             |
| c49615.graph_c0 | 0.0179018      | 0              | 0.0146077      | 0.7034477      | 1.4663958      | 0.6663057      | 1.022E-07 | 6.478286  | up        | predicted protein [Physcomitrella patens]                                                     |
| c49616.graph_c0 | 519.61001      | 479.72672      | 491.80504      | 1413.0669      | 1836.1998      | 1982.2143      | 8.431E-21 | 1.847382  | up        | hypothetical protein MIMGU_mgv1a012029mg [Erythranthe guttata]                                |
| c49618.graph_c2 | 0.1935768      | 0.3745323      | 0.5190019      | 1.1217046      | 1.2254447      | 0.998086       | 0.0002536 | 1.662923  | up        | hypothetical protein NDA1_UG05590 [Naumovozyma dairenensis CBS 4711]                          |
| c49623.graph_c1 | 0.3942613      | 0.5177905      | 1.0528822      | 1.9535887      | 2.8878004      | 1.6574407      | 0.0004696 | 1.762787  | up        | predicted protein [Physcomitrella patens]                                                     |
| c49627.graph_c0 | 0.115403       | 0.1041981      | 0.131835       | 0.7021524      | 1.6426585      | 0.8069959      | 0.0003879 | 3.195728  | up        | predicted protein [Physcomitrella patens]                                                     |
| c49629.graph_c0 | 0.494653       | 0.5582816      | 0.8745378      | 2.9260428      | 4.4282679      | 1.7667118      | 0.0020933 | 2.281561  | up        | hypothetical protein THAOC_26120, partial [Thalassiosira oceanica]                            |
| c49632.graph_c0 | 0.4055554      | 0.3661785      | 0.7091355      | 1.835969       | 2.9563795      | 2.0910517      | 7.98E-07  | 2.251224  | up        | hypothetical protein THAOC_09683, partial [Thalassiosira oceanica]                            |
| c49642.graph_c0 | 0.312397       | 0.0940217      | 0.5438152      | 2.2703206      | 4.2509264      | 1.5033434      | 0.0016472 | 3.112081  | up        | -                                                                                             |
| c49651.graph_c0 | 0.3740798      | 0.4101359      | 0.4578691      | 6.7400404      | 13.562897      | 3.3451983      | 0.0016749 | 4.2869    | up        | Os02g0639600 [Oryza sativa Japonica Group]                                                    |
| c49656.graph_c0 | 0.6511487      | 0.4409447      | 0.7969981      | 4.6427566      | 7.9787989      | 5.1409206      | 6.551E-10 | 3.267264  | up        | PREDICTED: obg-like ATPase 1 [Pyrus x bretschneideri]                                         |
| c49667.graph_c0 | 0.471432       | 0.6191402      | 0.6994266      | 2.607599       | 3.6832466      | 2.3685639      | 1.38E-07  | 2.312754  | up        | PREDICTED: eukaryotic translation initiation factor 3 subunit D-like [Pyrus x bretschneideri] |
| c49672.graph_c0 | 0.2569665      | 0.3796637      | 0.4003031      | 7.0474829      | 7.9051274      | 3.9785378      | 2.291E-10 | 4.235048  | up        | nitric oxide dioxygenase [Cladophialophora psammophila CBS 110553]                            |
| c49674.graph_c1 | 0.1048127      | 0.3312263      | 0.2138158      | 4.3843094      | 9.570782       | 3.1327274      | 0.0002075 | 4.751395  | up        | pyrophosphate--fructose-6-phosphate 1-phosphotransferase [Galdieria sulphuraria]              |
| c49674.graph_c2 | 47.124338      | 38.382173      | 51.618924      | 92.183542      | 89.515409      | 84.835757      | 7.374E-12 | 1.001542  | up        | PREDICTED: NAC domain-containing protein 100-like [Sesamum indicum]                           |
| c49676.graph_c0 | 0.0604152      | 0              | 0.0492983      | 3.0632281      | 3.3262467      | 3.2026293      | 7.059E-22 | 6.488768  | up        | --                                                                                            |

| #ID             | 28 h-1<br>FPKM | 28 h-2<br>FPKM | 28 h-3<br>FPKM | 48 h-1<br>FPKM | 48 h-2<br>FPKM | 48 h-3<br>FPKM | FDR       | log2FC    | regulated | nr_annotation                                                                                               |
|-----------------|----------------|----------------|----------------|----------------|----------------|----------------|-----------|-----------|-----------|-------------------------------------------------------------------------------------------------------------|
| c49686.graph_c0 | 6.8052797      | 7.5124722      | 7.6810473      | 2.3454431      | 2.0344626      | 1.6247483      | 4.744E-19 | -1.82635  | down      | PREDICTED: DNA repair protein REV1 [Sesamum indicum]                                                        |
| c49697.graph_c0 | 0.1479232      | 0.2671216      | 0.3621125      | 1.1250216      | 1.2414833      | 1.3764265      | 4.086E-07 | 2.30656   | up        | 26S proteasome regulatory subunit N5 [Mucor circinelloides f. circinelloides 1006PhL]                       |
| c49708.graph_c0 | 266.10321      | 225.32372      | 238.68037      | 1086.0036      | 1275.7148      | 1272.0811      | 4.727E-53 | 2.354294  | up        | -                                                                                                           |
| c49708.graph_c1 | 41.16762       | 37.573694      | 39.59605       | 17.54707       | 18.988756      | 17.340091      | 7.345E-14 | -1.093922 | down      | PREDICTED: uncharacterized protein LOC105169648 [Sesamum indicum]                                           |
| c49708.graph_c2 | 6.4126069      | 6.3163449      | 5.8215894      | 1.724217       | 1.9757089      | 3.4128076      | 1.847E-05 | -1.348055 | down      | PREDICTED: LOW QUALITY PROTEIN: multiple C2 and transmembrane domain-containing protein 1 [Sesamum indicum] |
| c49716.graph_c0 | 8.2621484      | 8.1593152      | 6.9525283      | 15.491137      | 14.099576      | 17.81232       | 5.353E-06 | 1.062197  | up        | -                                                                                                           |
| c49716.graph_c2 | 33.327555      | 29.436352      | 28.284709      | 92.622818      | 84.478256      | 86.802846      | 4.169E-28 | 1.579128  | up        | NADH dehydrogenase subunit 5 [Beta vulgaris subsp. maritima]                                                |
| c49717.graph_c0 | 0.4295044      | 0.6980439      | 0.9462746      | 9.9085976      | 13.553764      | 10.608998      | 1.661E-31 | 4.075559  | up        | --                                                                                                          |
| c49722.graph_c0 | 3.2817933      | 2.7779547      | 2.7708998      | 1.169976       | 1.132335       | 1.3366409      | 1.855E-05 | -1.237671 | down      | hypothetical protein VITISV_035665 [Vitis vinifera]                                                         |
| c49723.graph_c0 | 0.0964731      | 0.1306592      | 0.1968031      | 1.0700088      | 2.2670891      | 1.0880999      | 8.803E-05 | 3.415965  | up        | delta-9 fatty acid desaturase [Cryptococcus curvatus]                                                       |
| c49724.graph_c0 | 0.1884578      | 0.4821191      | 0.89705        | 3.9415876      | 7.1281028      | 3.5780535      | 7.798E-06 | 3.258094  | up        | -                                                                                                           |
| c49733.graph_c1 | 0.1209831      | 0.4642546      | 0.6663681      | 3.7571964      | 4.9144447      | 2.2514962      | 4.94E-06  | 3.166775  | up        | -                                                                                                           |
| c49740.graph_c0 | 231.02103      | 252.9481       | 247.74128      | 696.8045       | 628.92566      | 720.6913       | 7.598E-15 | 1.526731  | up        | putative galactinol synthase family protein [Populus trichocarpa]                                           |
| c49741.graph_c0 | 0.0790759      | 0.0713981      | 0.1290506      | 2.0046909      | 1.8051679      | 1.6945738      | 6.876E-16 | 4.3433    | up        | PREDICTED: serine-threonine kinase receptor-associated protein-like [Setaria italica]                       |
| c49743.graph_c0 | 0.6029889      | 1.0548571      | 1.9373838      | 7.834411       | 15.435247      | 6.1208884      | 0.0009096 | 3.064882  | up        | -                                                                                                           |
| c49744.graph_c0 | 0.4667717      | 0.379306       | 0.9141166      | 4.6741736      | 6.3306802      | 3.0534809      | 1.984E-06 | 3.037263  | up        | S-Adenosylmethionine decarboxylase [Ectocarpus siliculosus]                                                 |
| c49750.graph_c2 | 31.922568      | 28.308388      | 27.824593      | 74.556614      | 88.378228      | 99.889961      | 1.314E-23 | 1.615542  | up        | hypothetical protein MIMGU_mgv1a015998mg [Erythranthe guttata]                                              |
| c49752.graph_c0 | 9.3389903      | 11.149285      | 9.9490381      | 2.2360399      | 2.9261809      | 2.4577595      | 4.001E-09 | -1.959441 | down      | PREDICTED: probable protein phosphatase 2C 75 [Populus euphratica]                                          |
| c49755.graph_c0 | 0.1172358      | 0.4234117      | 0.334822       | 3.4922172      | 3.0698648      | 1.5867339      | 2.109E-05 | 3.268765  | up        | -                                                                                                           |
| c49756.graph_c0 | 0.1349986      | 0.2285457      | 0.2478549      | 0.4491917      | 0.8384273      | 0.4948519      | 0.0028881 | 1.577638  | up        | predicted protein [Physcomitrella patens]                                                                   |
| c49766.graph_c0 | 0.3941313      | 0.2264586      | 0.7601641      | 3.3608808      | 3.9934729      | 2.1822506      | 1.579E-07 | 2.829197  | up        | predicted protein [Hordeum vulgare subsp. vulgare]                                                          |
| c49767.graph_c0 | 0.0277164      | 0.0250253      | 0.0452328      | 3.3727315      | 9.1185938      | 4.1264247      | 1.073E-07 | 7.434414  | up        | -                                                                                                           |
| c49768.graph_c0 | 0.4837816      | 0.4138194      | 1.1427316      | 4.0344         | 7.3170154      | 2.6995182      | 0.0020884 | 2.818751  | up        | PREDICTED: thiol protease aleurain-like [Eucalyptus grandis]                                                |
| c49770.graph_c0 | 12.62167       | 17.373368      | 25.663875      | 122.7997       | 244.65206      | 98.981849      | 0.0005849 | 3.10091   | up        | Elongation factor 1-alpha [Auxenochlorella protothecoides]                                                  |
| c49771.graph_c1 | 55.921668      | 56.057241      | 54.990325      | 29.27368       | 23.913749      | 21.955616      | 9.721E-15 | -1.1048   | down      | PREDICTED: LOW QUALITY PROTEIN: DUF21 domain-containing protein At4g14240 [Sesamum indicum]                 |
| c49777.graph_c0 | 69.591415      | 62.890252      | 75.294998      | 30.316847      | 31.536845      | 31.361482      | 1.179E-14 | -1.115279 | down      | PREDICTED: 1-acyl-sn-glycerol-3-phosphate acyltransferase 2-like [Sesamum indicum]                          |
| c49779.graph_c0 | 0.0289673      | 0.1046188      | 0.0709111      | 1.5788793      | 3.1507704      | 1.0128185      | 0.0001363 | 4.847775  | up        | PREDICTED: V-type proton ATPase subunit a1 [Brachypodium distachyon]                                        |

| #ID             | 28 h-1<br>FPKM | 28 h-2<br>FPKM | 28 h-3<br>FPKM | 48 h-1<br>FPKM | 48 h-2<br>FPKM | 48 h-3<br>FPKM | FDR       | log2FC    | regulated | nr_annotation                                                                                                                                               |
|-----------------|----------------|----------------|----------------|----------------|----------------|----------------|-----------|-----------|-----------|-------------------------------------------------------------------------------------------------------------------------------------------------------------|
| c49781.graph_c0 | 0.1154742      | 0.2085248      | 0.2120085      | 1.2807556      | 1.2017418      | 1.4652111      | 4.087E-10 | 2.922191  | up        | predicted protein [Physcomitrella patens]                                                                                                                   |
| c49799.graph_c0 | 0.185814       | 1.0066358      | 1.5162271      | 6.5949223      | 13.05814       | 6.077698       | 9.636E-05 | 3.281004  | up        | -                                                                                                                                                           |
| c49804.graph_c0 | 757.42485      | 678.76684      | 777.54111      | 337.27915      | 317.68547      | 283.02668      | 2.412E-09 | -1.194716 | down      | PREDICTED: histidinol-phosphate aminotransferase, chloroplastic-like [Sesamum indicum]                                                                      |
| c49805.graph_c0 | 0.2199861      | 0.4125326      | 0.4832877      | 5.4053722      | 9.2030406      | 3.340047       | 3.397E-05 | 4.045364  | up        | PREDICTED: trifunctional UDP-glucose 4,6-dehydratase/UDP-4-keto-6-deoxy-D-glucose 3,5-epimerase/UDP-4-keto-L-rhamnose-reductase RHM1 [Tarenaya hassleriana] |
| c49808.graph_c0 | 0.2844683      | 0.3210603      | 0.058031       | 3.6058457      | 4.2019519      | 4.6522667      | 8.278E-17 | 4.271336  | up        | -                                                                                                                                                           |
| c49811.graph_c0 | 0.3812145      | 0.5736683      | 0.8295145      | 1.5301887      | 2.5595517      | 1.7198561      | 0.0001264 | 1.737585  | up        | DEAD-box ATP-dependent RNA helicase 15 [Arabidopsis thaliana]                                                                                               |
| c49812.graph_c0 | 1.1625527      | 1.3901116      | 1.4101309      | 4.9386224      | 14.682994      | 10.418878      | 0.000423  | 2.948772  | up        | Short-chain dehydrogenase/reductase SDK [Macrophomina phaseolina MS61]                                                                                      |
| c49814.graph_c0 | 0.1975512      | 0.3057776      | 0.5526864      | 1.5382375      | 1.7811646      | 1.3368839      | 1.309E-06 | 2.180823  | up        | PREDICTED: serine--tRNA ligase-like [Nelumbo nucifera]                                                                                                      |
| c49823.graph_c1 | 1.5619261      | 1.1445692      | 1.4961744      | 0.3730164      | 0.3647683      | 0.6382841      | 0.0004179 | -1.57381  | down      | -                                                                                                                                                           |
| c49826.graph_c0 | 0.1218614      | 0.2672144      | 0.3125192      | 0.9047432      | 1.7299137      | 1.040655       | 4.165E-05 | 2.422409  | up        | Methylmalonyl-CoA mutase, alpha chain, catalytic domain-containing protein [Rozella allomycis CSF55]                                                        |
| c49840.graph_c0 | 3.8415819      | 4.9947671      | 7.0468043      | 23.529366      | 57.405257      | 22.426786      | 0.0071973 | 2.732871  | up        | predicted protein [Hordeum vulgare subsp. vulgare]                                                                                                          |
| c49846.graph_c0 | 0.2413242      | 0.1961038      | 0.4726045      | 2.5083486      | 2.7545091      | 1.3064859      | 1.459E-05 | 2.895835  | up        | predicted protein [Micromonas sp. RCC299]                                                                                                                   |
| c49852.graph_c0 | 0.1684451      | 0.1330789      | 0.2405372      | 0.8807559      | 1.4985414      | 0.9736771      | 4.796E-08 | 2.66317   | up        | hypothetical protein M422DKAF1_250521 [Sphaerobolus stellatus SS141]                                                                                        |
| c49855.graph_c0 | 0.1316077      | 0.3327224      | 0.3651288      | 1.3012153      | 1.5552081      | 0.8312508      | 3.233E-05 | 2.195321  | up        | enolase [Rhizoctonia solani AG-1 IB]                                                                                                                        |
| c49858.graph_c0 | 2.0397289      | 2.9639601      | 3.4718388      | 35.389122      | 75.879712      | 30.554422      | 5.969E-05 | 4.097765  | up        | protein of unknown function [Taphrina deformans PYCC 5710]                                                                                                  |
| c49861.graph_c1 | 19.793273      | 25.383814      | 19.15269       | 9.935859       | 10.349427      | 9.7298934      | 5.246E-07 | -1.057466 | down      | hypothetical protein POPTR_0001s24240g [Populus trichocarpa]                                                                                                |
| c49863.graph_c0 | 0.1609289      | 0.4116939      | 0.5033806      | 2.1758855      | 4.105936       | 2.0570955      | 4.455E-05 | 2.988415  | up        | -                                                                                                                                                           |
| c49864.graph_c0 | 0.2507713      | 0.3113316      | 0.306941       | 5.7216796      | 6.8611972      | 3.853692       | 2.7E-14   | 4.284109  | up        | hypothetical protein EUTSA_v10013921mg [Eutrema salsugineum]                                                                                                |
| c49865.graph_c0 | 1.9281791      | 1.7780067      | 1.6068545      | 12.220545      | 28.481608      | 35.95284       | 9.255E-06 | 3.877905  | up        | PREDICTED: monosaccharide-sensing protein $\alpha$ -like [Sesamum indicum1]                                                                                 |
| c49870.graph_c0 | 0.2905987      | 0.5009136      | 0.6251507      | 3.5830914      | 5.9953159      | 2.5326927      | 8.101E-05 | 3.132986  | up        | --                                                                                                                                                          |
| c49873.graph_c0 | 0.2889983      | 0.0948867      | 0.3644495      | 1.0323751      | 1.5875945      | 0.8000719      | 0.0002323 | 2.228972  | up        | hypothetical protein MIMGU_mgv1a007681mg [Erythranthe guttata]                                                                                              |
| c49874.graph_c0 | 3.5094396      | 3.1957778      | 2.6433915      | 0.4182325      | 0.6847394      | 0.4398027      | 1.226E-09 | -2.562906 | down      | hypothetical protein MIMGU_mgv1b019086mg [Erythranthe guttata]                                                                                              |
| c49876.graph_c7 | 4.6939813      | 3.8377628      | 3.136583       | 2.2019563      | 1.0919048      | 1.4173569      | 0.0013537 | -1.253815 | down      | PREDICTED: squalene monooxygenase-like [Sesamum indicum]                                                                                                    |
| c49876.graph_c9 | 40.579933      | 43.40019       | 44.259347      | 12.678394      | 16.808213      | 17.727535      | 1.45E-14  | -1.405153 | down      | PREDICTED: uncharacterized protein LOC105160027 [Sesamum indicum1]                                                                                          |
| c49882.graph_c0 | 0.1197477      | 0.1621814      | 0.1954263      | 2.2009406      | 5.7888736      | 1.6207313      | 0.0042414 | 4.362292  | up        | -                                                                                                                                                           |
| c49883.graph_c0 | 0.2737711      | 0.6709434      | 0.89358        | 1.9830004      | 2.5734169      | 1.1910117      | 0.006825  | 1.686125  | up        | unnamed protein product [Vitis vinifera]                                                                                                                    |
| c49885.graph_c0 | 0.2992027      | 0.641611       | 0.3967388      | 1.2325997      | 2.762248       | 1.8982381      | 0.0004115 | 2.170782  | up        | hypothetical protein E5Q_00045 [Mixia osmundae IAM 14324]                                                                                                   |

| #ID             | 28 h-1<br>FPKM | 28 h-2<br>FPKM | 28 h-3<br>FPKM | 48 h-1<br>FPKM | 48 h-2<br>FPKM | 48 h-3<br>FPKM | FDR       | log2FC   | regulated | nr_annotation                                                                             |
|-----------------|----------------|----------------|----------------|----------------|----------------|----------------|-----------|----------|-----------|-------------------------------------------------------------------------------------------|
| c49905.graph_c0 | 0.6010852      | 0.6784045      | 1.4407869      | 8.6192177      | 11.552501      | 11.821782      | 2.491E-28 | 3.59097  | up        | PREDICTED: 2-methylene-furan-3-one reductase-like [Solanum lycopersicum]                  |
| c49908.graph_c0 | 0.0359911      | 0.259973       | 0.0881054      | 1.505507       | 1.4982414      | 1.3801848      | 1.133E-12 | 3.557821 | up        | PREDICTED: probable disease resistance protein At5g63020 [Vitis vinifera]                 |
| c49910.graph_c0 | 0.0477467      | 0.215554       | 0.0779218      | 2.6629881      | 1.1540917      | 2.2618058      | 1.893E-06 | 4.209029 | up        | -                                                                                         |
| c49914.graph_c0 | 0.4139433      | 0.3971115      | 0.3799962      | 0.8854374      | 2.0497333      | 1.2839149      | 0.0026426 | 1.85521  | up        | hypothetical protein GU11HDRAF1_1484 [Guillardia theta]                                   |
| c49918.graph_c0 | 18.410415      | 19.912086      | 20.536416      | 54.76643       | 53.573646      | 54.452185      | 1.481E-25 | 1.510071 | up        | CCMP27121<br>PREDICTED: uncharacterized protein At1g04910-like [Sesamum indicum]          |
| c49918.graph_c1 | 0.4773558      | 0.5746767      | 0.5842776      | 2.8237236      | 6.5169628      | 6.2813307      | 2.638E-06 | 3.28346  | up        | unnamed protein product [Coffea canephora]                                                |
| c49922.graph_c0 | 0.1010075      | 0.0608002      | 0.0824213      | 0.8535632      | 1.9441304      | 1.6139277      | 7.5E-09   | 4.203973 | up        | PREDICTED: neutral ceramidase-like [Cicer arietinum]                                      |
| c49923.graph_c0 | 0.4092293      | 0.7105687      | 0.8733496      | 5.1074789      | 7.0170723      | 3.3374435      | 2.634E-06 | 2.996112 | up        | -                                                                                         |
| c49925.graph_c0 | 0.5078722      | 0.3821341      | 0.7943042      | 2.4677674      | 2.7279655      | 1.3843116      | 0.0003413 | 2.009788 | up        | -                                                                                         |
| c49926.graph_c0 | 7.845358       | 10.273957      | 20.720162      | 42.131571      | 71.734947      | 39.71746       | 0.0003704 | 2.018121 | up        | cysteine protease 1 [Brachiaria hybrid cultivar]                                          |
| c49927.graph_c1 | 0.0551489      | 0.3983543      | 0.2250053      | 3.495265       | 3.0363038      | 3.9808842      | 1.059E-15 | 3.997123 | up        | -                                                                                         |
| c49928.graph_c0 | 0.2873559      | 0.6745842      | 0.1875841      | 1.4569792      | 2.5467632      | 1.5556936      | 3.308E-05 | 2.311089 | up        | hypothetical protein M4ZZDRAF1_23110 [Spnaerobotus stellatus SS141]                       |
| c49929.graph_c0 | 0.0712657      | 0              | 0.0290761      | 5.2845719      | 3.0384279      | 6.3700477      | 1.35E-16  | 7.238162 | up        | -                                                                                         |
| c49931.graph_c4 | 4.1771929      | 4.1793555      | 4.2745126      | 11.620158      | 10.21803       | 9.9066101      | 2.945E-10 | 1.374518 | up        | PREDICTED: uncharacterized protein LOC10511468 [Sesamum indicum]                          |
| c49934.graph_c0 | 1.029528       | 0.9295673      | 1.3879689      | 4.5958787      | 6.3714849      | 2.978688       | 0.0003451 | 2.099088 | up        | ATP-dependent RNA helicase ded1 [Exophiala dermatitidis NIH/IT86561]                      |
| c49935.graph_c0 | 0.4352916      | 0.7336513      | 0.9708646      | 3.5312903      | 7.5988533      | 2.8475471      | 0.0051375 | 2.740618 | up        | -                                                                                         |
| c49936.graph_c1 | 7.3183245      | 7.9426621      | 6.6754279      | 13.618049      | 19.224533      | 20.538197      | 1.453E-08 | 1.318541 | up        | PREDICTED: heat shock protein 83-like [Sesamum indicum]                                   |
| c49936.graph_c4 | 35.846275      | 43.291308      | 34.51187       | 53.775948      | 85.366403      | 98.19043       | 0.001234  | 1.095514 | up        | PREDICTED: 4-coumarate--CoA ligase 2 [Sesamum indicum]                                    |
| c49938.graph_c0 | 0.2671457      | 0.160805       | 0.1271601      | 6.2928146      | 17.12955       | 10.646219      | 5.414E-09 | 5.968053 | up        | -                                                                                         |
| c49940.graph_c0 | 0.1537376      | 0.104108       | 0.3449837      | 2.0218147      | 4.5159857      | 1.430529       | 0.0022254 | 3.756013 | up        | PREDICTED: DEAD-box ATP-dependent RNA helicase 7-like [Musa acuminata subsp. malaccensis] |
| c49947.graph_c0 | 0.0334959      | 0.0907309      | 0.0273324      | 0.6368773      | 0.7646535      | 0.4155723      | 2.739E-09 | 3.628661 | up        | hypothetical protein SELMODRAF1_141245 [Selaginella moellendorffii]                       |
| c49948.graph_c1 | 0.0653509      | 0.236023       | 0.2133033      | 3.8105069      | 7.1082255      | 5.454389       | 1.668E-15 | 5.024408 | up        | hypothetical protein SELMODRAF1_424962 [Selaginella moellendorffii]                       |
| c49949.graph_c0 | 2.1697509      | 3.7418459      | 3.1160783      | 13.724092      | 21.007269      | 8.7855104      | 0.0009152 | 2.308935 | up        | ATP synthase subunit alpha [Taphrina deformans PYCC 5710]                                 |
| c49952.graph_c0 | 0.025263       | 0.0684303      | 0.0206144      | 1.7292248      | 1.8658281      | 3.1058013      | 5.141E-14 | 5.911499 | up        | -                                                                                         |
| c49954.graph_c0 | 0.0589593      | 0.0798521      | 0.2164964      | 4.3720129      | 4.2357528      | 3.3914484      | 1.758E-26 | 5.120354 | up        | -                                                                                         |
| c49959.graph_c0 | 0.5559545      | 0.2316807      | 0.139586       | 2.11414        | 3.5605089      | 1.6882107      | 2.27E-05  | 3.027001 | up        | predicted protein [Physcomitrella patens]                                                 |
| c49964.graph_c0 | 0.0954188      | 0.2584628      | 0.2595366      | 3.5075616      | 4.2710761      | 3.44387        | 2.216E-20 | 4.233288 | up        | hypothetical protein GU11HDRAF1_68249 [Guillardia theta]                                  |
| c49972.graph_c3 | 0.2955726      | 0.1642304      | 0.2411848      | 1.8156601      | 2.7172854      | 1.1026861      | 8.97E-05  | 3.046697 | up        | CCMP27121<br>ABC-2 type transporter domain-containing protein [Kozella allomyces CSF551]  |

| #ID             | 28 h-1<br>FPKM | 28 h-2<br>FPKM | 28 h-3<br>FPKM | 48 h-1<br>FPKM | 48 h-2<br>FPKM | 48 h-3<br>FPKM | FDR       | log2FC    | regulated | nr_annotation                                                                     |
|-----------------|----------------|----------------|----------------|----------------|----------------|----------------|-----------|-----------|-----------|-----------------------------------------------------------------------------------|
| c49978.graph_c0 | 0.024163       | 0.1527183      | 0.0788672      | 6.2788118      | 11.356458      | 10.192593      | 2.219E-27 | 6.799339  | up        | glutathione-independent formaldehyde dehydrogenase [Bathycoccus brassicol]        |
| c49979.graph_c0 | 0              | 0.2603516      | 0.3697413      | 2.4018758      | 2.876387       | 1.5331905      | 2.035E-08 | 3.476395  | up        | -                                                                                 |
| c49982.graph_c0 | 0.045492       | 0.041075       | 0.1299238      | 1.6146046      | 2.474084       | 1.8471413      | 1.433E-20 | 4.81124   | up        | PREDICTED: glucose-6-phosphate isomerase, cytosolic 2-like [Cucumis sativus]      |
| c49983.graph_c0 | 25.106364      | 23.298379      | 22.117928      | 10.84379       | 11.612547      | 11.641413      | 1.379E-06 | -1.007532 | down      | PREDICTED: uncharacterized protein LOC104590989 [Nelumbo nucifera]                |
| c49987.graph_c0 | 0.3086752      | 0.1045143      | 0.1889073      | 1.5161654      | 2.0725076      | 1.2620378      | 1.365E-10 | 3.0492    | up        | -                                                                                 |
| c49989.graph_c0 | 0.2926539      | 0.264239       | 0.5799505      | 1.8018072      | 2.9754766      | 1.6975453      | 4.817E-06 | 2.54488   | up        | threonyl-tRNA synthetase [Mucor circinelloides f. circinelloides 1006Pb1]         |
| c49993.graph_c0 | 0.0540618      | 0.1098286      | 0.3198261      | 0.5824817      | 0.3992797      | 0.4725573      | 0.0037829 | 1.634116  | up        | secreted protein [Achlya hypogyna]                                                |
| c49995.graph_c0 | 0.3681654      | 0.4273956      | 0.8583426      | 1.2666939      | 1.6244157      | 1.2457384      | 0.0029252 | 1.36068   | up        | hypothetical protein GU11HDRAF1_99801 [Guillardia theta CCMP2712]                 |
| c49998.graph_c0 | 0.1633811      | 0.1475178      | 0.1333176      | 5.8815707      | 11.847317      | 4.9754024      | 9.978E-08 | 5.710121  | up        | predicted protein [Physcomitrella patens]                                         |
| c50003.graph_c0 | 0.0191335      | 0.0691031      | 0.0936768      | 1.9402525      | 5.8580673      | 2.1148706      | 0.0001619 | 5.795651  | up        | -                                                                                 |
| c50012.graph_c0 | 0.1684845      | 0.3803142      | 1.9934883      | 5.2323787      | 10.18115       | 5.6058899      | 3.994E-05 | 3.078013  | up        | -                                                                                 |
| c50013.graph_c0 | 0.1160777      | 0.1048073      | 0.2367962      | 2.6484677      | 3.1174783      | 2.4220515      | 2.415E-15 | 4.20056   | up        | predicted protein [Micromonas pusilla CCMP1545]                                   |
| c50016.graph_c0 | 0.1528512      | 0.5980447      | 0.4573263      | 2.2604188      | 4.720861       | 1.7814434      | 0.0035435 | 2.893121  | up        | -                                                                                 |
| c50016.graph_c1 | 0.6468668      | 0.4283107      | 1.055676       | 9.8394152      | 13.898223      | 10.749259      | 1.534E-31 | 4.052584  | up        | -                                                                                 |
| c50017.graph_c1 | 9.8616381      | 11.136735      | 9.3051042      | 18.510847      | 22.071013      | 18.439466      | 3.602E-08 | 1.002208  | up        | PREDICTED: RNA-binding protein 38 [Sesamum indicum]                               |
| c50018.graph_c0 | 58.202001      | 55.327226      | 60.037508      | 27.746945      | 24.085814      | 19.487021      | 8.898E-13 | -1.236401 | down      | PREDICTED: uncharacterized protein LOC105455975 [Malus domestica]                 |
| c50019.graph_c0 | 0.2438241      | 0.3459504      | 0.2842264      | 2.0751505      | 1.730632       | 0.9428714      | 0.0003031 | 2.492851  | up        | protein of unknown function [Taphrina deformans PYCC 5710]                        |
| c50024.graph_c1 | 1.8037966      | 2.510227       | 2.6196822      | 5.8944134      | 7.3777445      | 6.9993064      | 2.4E-11   | 1.585913  | up        | hypothetical protein CICLE_v10007524mg [Citrus clementina]                        |
| c50027.graph_c0 | 0.2734313      | 0.2160225      | 0.7251325      | 4.2024559      | 8.6286039      | 4.3175654      | 4.624E-06 | 3.850733  | up        | -                                                                                 |
| c50029.graph_c0 | 0.6007573      | 0.9944504      | 1.5795754      | 7.7842643      | 13.938351      | 5.0065765      | 0.0009808 | 3.109827  | up        | -                                                                                 |
| c50037.graph_c1 | 0.2594386      | 0.4684975      | 0.352833       | 3.2885758      | 3.9483603      | 2.6335395      | 3.657E-11 | 3.233172  | up        | -                                                                                 |
| c50037.graph_c2 | 0.112502       | 0.0507894      | 0.7344054      | 3.9929263      | 4.1544852      | 5.9637659      | 7.937E-17 | 4.008694  | up        | -                                                                                 |
| c50041.graph_c0 | 0              | 0.0469703      | 0.1697955      | 2.7035695      | 5.2741429      | 3.3443984      | 1.47E-13  | 5.736921  | up        | phosphoric diester hydrolase, putative [Ricinus communis]                         |
| c50042.graph_c2 | 0.0869148      | 0.0261586      | 0.0354609      | 0.4039601      | 0.6419202      | 0.5718384      | 1.308E-12 | 3.479444  | up        | PREDICTED: uncharacterized protein LOC105170685 [Sesamum indicum]                 |
| c50051.graph_c0 | 2.287655       | 3.0693508      | 3.7334155      | 13.604534      | 20.125618      | 10.803076      | 5.034E-06 | 2.330933  | up        | hypothetical protein GU11HDRAF1_64866 [Guillardia theta CCMP2712]                 |
| c50053.graph_c0 | 0.1196366      | 0.1440276      | 0.0325408      | 2.2747239      | 4.6053844      | 0.9895285      | 0.0020099 | 4.770023  | up        | --                                                                                |
| c50054.graph_c0 | 0.6251739      | 0.4939142      | 0.7970887      | 4.7547236      | 14.533997      | 7.2274876      | 0.0005839 | 3.817118  | up        | PREDICTED: nucleolar and coiled-body phosphoprotein 1-like [Tarenaya hassleriana] |
| c50055.graph_c0 | 0.1025806      | 0.0926207      | 0              | 5.4611955      | 7.3007177      | 10.065773      | 3.386E-18 | 6.906357  | up        | -                                                                                 |

| #ID             | 28 h-1<br>FPKM | 28 h-2<br>FPKM | 28 h-3<br>FPKM | 48 h-1<br>FPKM | 48 h-2<br>FPKM | 48 h-3<br>FPKM | FDR       | log2FC    | regulated | nr_annotation                                                                                                      |
|-----------------|----------------|----------------|----------------|----------------|----------------|----------------|-----------|-----------|-----------|--------------------------------------------------------------------------------------------------------------------|
| c50055.graph_c1 | 0              | 0.0347403      | 0.1098867      | 3.2676773      | 5.0633936      | 5.4679479      | 5.497E-31 | 6.606951  | up        | -                                                                                                                  |
| c50058.graph_c0 | 0.0894259      | 0.2220438      | 0.3466114      | 8.5865598      | 19.363664      | 11.019134      | 1.41E-10  | 5.918128  | up        | -                                                                                                                  |
| c50059.graph_c0 | 42.810414      | 35.059946      | 45.6871        | 20.405567      | 6.4139015      | 6.1852667      | 7.009E-07 | -1.837619 | down      | hypothetical protein AMTR_s00028p00129850 [Amborella trichopoda]                                                   |
| c50063.graph_c0 | 12.118374      | 15.1203        | 15.338845      | 45.840889      | 43.950033      | 35.623065      | 5.784E-13 | 1.603236  | up        | -                                                                                                                  |
| c50064.graph_c0 | 0.2121932      | 0.3065449      | 0.4848142      | 2.7972933      | 5.043467       | 2.4411491      | 5.879E-06 | 3.3917    | up        | hypothetical protein VOLCADKAF1_93958 [Voivox carteri f. nagariensis]                                              |
| c50070.graph_c1 | 0.1039988      | 0.1252015      | 0.4667419      | 4.5480015      | 9.7059392      | 3.6166914      | 3.763E-05 | 4.713766  | up        | probable SEC14-phosphatidylinositol(PI)/phosphatidylcholine(PC) transfer protein [Piriformospora indica DSM 11827] |
| c50072.graph_c0 | 0.1591382      | 0.2873738      | 0.3153634      | 2.3629991      | 3.8770793      | 1.6923224      | 1.332E-05 | 3.417833  | up        | hypothetical protein GUILHDRKAF1_109518 [Guillardia theta CCMP2712]                                                |
| c50076.graph_c0 | 0.583145       | 0.8424404      | 0.7137623      | 20.253511      | 31.63606       | 28.808016      | 4.268E-38 | 5.272215  | up        | PREDICTED: peroxidase 73 [Sesamum indicum]                                                                         |
| c50077.graph_c0 | 0.2993941      | 0.7155656      | 0.6897971      | 3.8620119      | 8.1590173      | 3.8932567      | 0.0001012 | 3.25572   | up        | hypothetical protein VOLCADKAF1_12045 [Voivox carteri f. nagariensis]                                              |
| c50078.graph_c0 | 0.1235882      | 0.2710008      | 0.4610146      | 0.8056652      | 1.0905893      | 0.6571364      | 0.0008387 | 1.61611   | up        | predicted protein [Hordeum vulgare subsp. vulgare]                                                                 |
| c50079.graph_c2 | 3.1211377      | 3.5512576      | 3.0644698      | 0.6432963      | 1.2607646      | 2.1751243      | 0.0014616 | -1.227653 | down      | PREDICTED: uncharacterized protein LOC105174831 [Sesamum indicum]                                                  |
| c50080.graph_c0 | 2.2467483      | 3.003893       | 5.182678       | 23.495331      | 36.958554      | 28.508188      | 1.109E-17 | 3.1265    | up        | carbonyl reductase (NADPH) [Galdieria sulphuraria]                                                                 |
| c50082.graph_c0 | 0.3442842      | 0.2719993      | 0.4565162      | 8.128053       | 6.8769913      | 7.3293704      | 1.476E-26 | 4.423888  | up        | YALI0E30965p [Yarrowia lipolytica]                                                                                 |
| c50083.graph_c0 | 0.3003839      | 0.9221427      | 1.1275095      | 4.7975591      | 10.084191      | 3.659005       | 0.003371  | 3.013587  | up        | -                                                                                                                  |
| c50084.graph_c0 | 0.0228515      | 0              | 0.0186466      | 0.9848432      | 3.4981971      | 2.3711852      | 2.332E-07 | 7.39024   | up        | hypothetical protein PLEUSDKAF1_111188 [Pleurotus ostreatus PC151]                                                 |
| c50087.graph_c0 | 0.4289496      | 0.9784452      | 1.1790125      | 3.519905       | 4.2139743      | 2.4190169      | 1.194E-05 | 2.015059  | up        | PREDICTED: mitochondrial-processing peptidase subunit alpha-like [Musa acuminata subsp. malaccensis]               |
| c50088.graph_c0 | 0.2258927      | 0.3739266      | 0.445456       | 1.5032623      | 1.3397425      | 0.8704975      | 8.076E-05 | 1.876506  | up        | unknown [Picea sitchensis]                                                                                         |
| c50091.graph_c0 | 0.5281059      | 1.0573189      | 0.7869158      | 9.4882031      | 7.1532864      | 7.4325482      | 6.591E-21 | 3.391183  | up        | -                                                                                                                  |
| c50099.graph_c0 | 42.579653      | 42.880048      | 41.347556      | 100.41025      | 87.361306      | 83.986492      | 4.809E-12 | 1.145055  | up        | hypothetical protein, partial (mitochondrion) [Nicotiana tabacum]                                                  |
| c50101.graph_c0 | 0.4120535      | 0.4340533      | 0.5183581      | 1.3928218      | 2.1671785      | 1.2780533      | 1.748E-05 | 1.863172  | up        | predicted protein [Micromonas sp. RCC299]                                                                          |
| c50102.graph_c0 | 0.9131871      | 1.0027974      | 1.5910028      | 2.7843334      | 4.374782       | 3.256916       | 9.92E-06  | 1.60548   | up        | protein disulfide isomerase [Rhizoctonia solani 123E]                                                              |
| c50106.graph_c0 | 0.1853374      | 0.2510135      | 0.1323296      | 1.9675291      | 2.5510059      | 1.0974509      | 5.749E-06 | 3.347574  | up        | saccharopepsin [Mucor circinelloides f. circinelloides 1006PhL]                                                    |
| c50108.graph_c1 | 24.125978      | 21.344004      | 24.176527      | 105.47919      | 105.51871      | 94.570833      | 2.716E-49 | 2.176241  | up        | PREDICTED: cationic amino acid transporter 7, chloroplastic [Sesamum indicum]                                      |
| c50108.graph_c2 | 3.5794578      | 3.8475176      | 4.0334972      | 7.562044       | 10.528833      | 9.6123733      | 0.0024223 | 1.309935  | up        | -                                                                                                                  |
| c50109.graph_c0 | 89.262643      | 91.063343      | 85.762269      | 239.41682      | 207.44227      | 174.28884      | 3.861E-07 | 1.269703  | up        | PREDICTED: pentatricopeptide repeat-containing protein At5g66520-like [Sesamum indicum]                            |
| c50110.graph_c2 | 1.9406985      | 2.7314778      | 2.0726452      | 14.796046      | 14.179971      | 11.716913      | 1.115E-27 | 2.637993  | up        | PREDICTED: uncharacterized protein LOC105163215 [Sesamum indicum]                                                  |
| c50110.graph_c4 | 1.0145023      | 1.4588155      | 1.195748       | 3.6673569      | 4.5410493      | 4.1107745      | 3.919E-06 | 1.786585  | up        | PREDICTED: uncharacterized protein LOC105159914 [Sesamum indicum]                                                  |

| #ID             | 28 h-1<br>FPKM | 28 h-2<br>FPKM | 28 h-3<br>FPKM | 48 h-1<br>FPKM | 48 h-2<br>FPKM | 48 h-3<br>FPKM | FDR       | log2FC    | regulated | nr_annotation                                                                                      |
|-----------------|----------------|----------------|----------------|----------------|----------------|----------------|-----------|-----------|-----------|----------------------------------------------------------------------------------------------------|
| c50112.graph_c0 | 0.1692594      | 0.0382064      | 0.0863215      | 1.8773021      | 2.6138172      | 1.6465491      | 9.957E-19 | 4.423275  | up        | -                                                                                                  |
| c50114.graph_c0 | 0.1563399      | 0.1693923      | 0.4847739      | 2.3384336      | 5.8783078      | 2.3981227      | 0.0009151 | 3.739922  | up        | -                                                                                                  |
| c50115.graph_c0 | 0.1189688      | 0.3759617      | 0.3276367      | 2.0169723      | 4.4132618      | 1.274733       | 0.0077576 | 3.262005  | up        | -                                                                                                  |
| c50116.graph_c0 | 0.8152906      | 0.557675       | 0.7862288      | 16.503738      | 23.090439      | 16.802677      | 4.191E-40 | 4.744647  | up        | hypothetical protein O988_02039 [Pseudogymnoascus pannorum VKM F-3808]                             |
| c50124.graph_c0 | 0.0768371      | 0.41626        | 0.5486112      | 5.7707514      | 13.310212      | 5.1781114      | 6.952E-05 | 4.573089  | up        | Formate/nitrite transporter [Trametes versicolor FP-101664 SS1]                                    |
| c50125.graph_c0 | 0.4096507      | 0.2641973      | 0.6685433      | 1.8174186      | 2.750478       | 1.4851176      | 3.957E-05 | 2.209746  | up        | PREDICTED: 26S proteasome non-ATPase regulatory subunit 1 homolog A-like [Brachypodium distachyon] |
| c50130.graph_c0 | 0.2352844      | 0.1062199      | 0.447977       | 2.7338691      | 4.6339246      | 3.8036711      | 1.123E-16 | 3.854553  | up        | --                                                                                                 |
| c50131.graph_c1 | 0.4936243      | 0.6077679      | 1.2449978      | 2.2184092      | 3.6758531      | 2.2269948      | 0.0003298 | 1.825949  | up        | hypothetical protein GU11_HDKAF1_14/1/5 [Guillardia theta CCMP27121]                               |
| c50134.graph_c0 | 0.1307311      | 0.0737737      | 0.3066921      | 1.6363989      | 2.6990968      | 2.1011468      | 6.815E-17 | 3.686785  | up        | -                                                                                                  |
| c50135.graph_c0 | 0.2631179      | 0.2850849      | 0.6011658      | 2.4902925      | 2.8972682      | 1.187061       | 0.0005588 | 2.559847  | up        | hypothetical protein ZEAMMB73_452342 [Zea mays]                                                    |
| c50137.graph_c0 | 0.3048628      | 0.3670167      | 0.3938788      | 1.2881202      | 3.0021357      | 1.461356       | 0.0026319 | 2.463307  | up        | Karyopherin beta [Blumeria graminis f. sp. tritici 96224]                                          |
| c50137.graph_c1 | 0.1226193      | 0.4059503      | 0.4669295      | 1.0880028      | 2.0856699      | 1.1985979      | 0.0005864 | 2.168313  | up        | -                                                                                                  |
| c50139.graph_c0 | 1.7133638      | 1.2155054      | 1.4313787      | 10.910784      | 12.325577      | 11.778851      | 3.388E-23 | 3.045436  | up        | PREDICTED: putative glucose-6-phosphate 1-epimerase [Sesamum indicum]                              |
| c50143.graph_c0 | 0.2004302      | 0.0723879      | 0.0981297      | 3.7600892      | 12.703684      | 6.194075       | 1.58E-05  | 5.958514  | up        | hypothetical protein CHLNCDRAFT_33886 [Chlorella variabilis]                                       |
| c50144.graph_c0 | 3.2430838      | 4.0478067      | 5.0202434      | 13.11844       | 24.720714      | 12.748535      | 0.0008688 | 2.073046  | up        | molecular chaperone DnaK [Galdieria sulphuraria]                                                   |
| c50145.graph_c2 | 2.9148281      | 3.6081355      | 3.0690012      | 12.5741        | 14.01518       | 15.218289      | 1.694E-14 | 2.163479  | up        | PREDICTED: subtilisin-like protease [Sesamum indicum]                                              |
| c50147.graph_c0 | 0.0600788      | 0.0904091      | 0.0490238      | 2.436936       | 1.9093366      | 0.4743312      | 0.0014342 | 4.651962  | up        | predicted protein [Thalassiosira pseudonana CCMP1335]                                              |
| c50150.graph_c0 | 0.3698816      | 0.2652102      | 0.5326242      | 1.1583406      | 1.0956441      | 0.7852835      | 0.0004791 | 1.424891  | up        | Eukaryotic translation initiation factor 3 subunit, putative [Ricinus communis]                    |
| c50152.graph_c0 | 0.0429149      | 0.2324888      | 0.1284001      | 0.9247627      | 1.4599062      | 0.6615055      | 5.465E-05 | 2.954942  | up        | predicted protein [Hordeum vulgare subsp. vulgare]                                                 |
| c50153.graph_c1 | 0.5455261      | 0.9577534      | 0.9521153      | 4.2257995      | 6.6336883      | 3.6404517      | 1.143E-06 | 2.599606  | up        | hypothetical protein EMIHDKAF1_4224/8 [Emiliania huxleyi CCMP15161]                                |
| c50156.graph_c1 | 57.78576       | 61.37613       | 51.163623      | 6.3445887      | 8.5727046      | 8.1131164      | 5.878E-73 | -2.849467 | down      | hypothetical protein VITISV_035070 [Vitis vinifera]                                                |
| c50158.graph_c0 | 0.0263972      | 0.0476683      | 0.0323098      | 3.2456526      | 3.7751235      | 5.6419467      | 3.729E-24 | 6.931781  | up        | -                                                                                                  |
| c50162.graph_c0 | 10.105065      | 9.5001704      | 8.7071153      | 2.9239789      | 3.5872219      | 3.3151188      | 2.122E-21 | -1.487702 | down      | PREDICTED: uncharacterized protein LOC105111104, partial [Populus euphratica]                      |
| c50164.graph_c1 | 0.103267       | 0.1864808      | 0.6741202      | 3.4033616      | 10.885682      | 3.901836       | 0.0035379 | 4.263218  | up        | -                                                                                                  |
| c50165.graph_c0 | 0.0326444      | 0.2652732      | 0.1997815      | 1.0344784      | 1.3370034      | 0.5154647      | 0.0013419 | 2.580006  | up        | predicted protein [Hordeum vulgare subsp. vulgare]                                                 |
| c50166.graph_c1 | 1.1228444      | 1.1739005      | 1.0126773      | 1.6480176      | 2.241862       | 2.6828384      | 0.0021221 | 1.025185  | up        | PREDICTED: putative late blight resistance protein homolog R1A-10 [Sesamum indicum]                |
| c50167.graph_c0 | 0.0137034      | 0.0371186      | 0.0782729      | 2.7965777      | 5.0051969      | 2.0710724      | 2.885E-09 | 6.291814  | up        | ATP-dependent Clp protease ATP-binding subunit ClpB [Galdieria sulphuraria]                        |



| #ID             | 28 h-1<br>FPKM | 28 h-2<br>FPKM | 28 h-3<br>FPKM | 48 h-1<br>FPKM | 48 h-2<br>FPKM | 48 h-3<br>FPKM | FDR       | log2FC    | regulated | nr_annotation                                                                                      |
|-----------------|----------------|----------------|----------------|----------------|----------------|----------------|-----------|-----------|-----------|----------------------------------------------------------------------------------------------------|
| c50170.graph_c0 | 0.114655       | 0.4658522      | 0.3976196      | 2.1436716      | 2.9253046      | 1.5841335      | 1.857E-07 | 2.80656   | up        | hypothetical protein CHLNCDRAFT_33886 [Chlorella variabilis]                                       |
| c50175.graph_c0 | 3.3428033      | 3.7061155      | 3.8441543      | 1.1036557      | 1.2944596      | 1.4730393      | 1.556E-06 | -1.454635 | down      | Putative gag-pol polyprotein, identical [Solanum demissum]                                         |
| c50176.graph_c1 | 0.189579       | 0.085586       | 0.1325957      | 0.8753982      | 1.6183659      | 0.4734636      | 0.0069075 | 2.900106  | up        | predicted protein [Hordeum vulgare subsp. vulgare]                                                 |
| c50179.graph_c0 | 2.5770212      | 3.9906018      | 5.1214044      | 16.894811      | 31.833143      | 14.407832      | 0.0009046 | 2.468005  | up        | EF2, translation elongation factor 2 [Ectocarpus siliculosus]                                      |
| c50185.graph_c0 | 278.57514      | 215.26942      | 252.26124      | 82.875119      | 40.691523      | 40.474528      | 3.912E-17 | -2.128203 | down      | BnaCnng12640D [Brassica napus]                                                                     |
| c50187.graph_c1 | 0.0767911      | 0.1040028      | 0.1566523      | 5.9863108      | 8.8166077      | 3.4644445      | 6.356E-09 | 5.798177  | up        | hypothetical protein GU11_HDKAF1_163621 [Guillardia theta CCMP27121]                               |
| c50199.graph_c0 | 40.940108      | 79.290653      | 69.841394      | 3.9195319      | 1.8269983      | 1.6740364      | 4.337E-13 | -4.619398 | down      | defensin-like protein 4 [Arabidopsis thaliana]                                                     |
| c50200.graph_c0 | 136.19936      | 128.7141       | 142.0611       | 48.218809      | 55.445768      | 48.456558      | 6.899E-22 | -1.379366 | down      | PREDICTED: uncharacterized protein LOC105159451 [Sesamum indicum]                                  |
| c50201.graph_c0 | 2.1129748      | 2.4801635      | 2.4138382      | 0.4463919      | 1.0403757      | 1.1915904      | 0.0033258 | -1.35996  | down      | -                                                                                                  |
| c50205.graph_c0 | 0.5667617      | 0.5629059      | 0.4624729      | 1.652348       | 1.5221412      | 1.4702493      | 0.0003068 | 1.589049  | up        | PREDICTED: protein FLX-like 4 [Sesamum indicum]                                                    |
| c50207.graph_c0 | 2.6795275      | 3.0058741      | 2.8159116      | 6.2783759      | 10.303874      | 11.905573      | 1.184E-05 | 1.776961  | up        | hypothetical protein MIMGU_mgv1a010254mg [Erythranthe guttata]                                     |
| c50212.graph_c0 | 3900.9833      | 4367.392       | 4538.9984      | 1696.6379      | 1475.104       | 1677.2971      | 1.183E-07 | -1.357517 | down      | hypothetical protein MIMGU_mgv1a016953mg [Erythranthe guttata]                                     |
| c50216.graph_c0 | 12.219704      | 15.576348      | 18.476007      | 45.89866       | 39.936887      | 34.962584      | 2.022E-08 | 1.430164  | up        | -                                                                                                  |
| c50226.graph_c0 | 7.0901977      | 8.9129807      | 8.9819763      | 39.425161      | 31.193128      | 35.168635      | 4.184E-20 | 2.127754  | up        | histone H4 [Zea mays]                                                                              |
| c50229.graph_c0 | 6.7923066      | 6.2404093      | 4.5701041      | 8.7607971      | 11.20121       | 15.859413      | 0.0040054 | 1.060232  | up        | PREDICTED: homeobox-leucine zipper protein ATHB-13 [Sesamum indicum]                               |
| c50230.graph_c0 | 28.24324       | 26.212181      | 21.148687      | 104.07311      | 69.103193      | 59.733356      | 0.0009191 | 1.675644  | up        | PREDICTED: zinc finger protein CONSTANS-LIKE 4-like [Sesamum indicum]                              |
| c50232.graph_c0 | 0.8230203      | 0.5944881      | 0.6044201      | 2.3994494      | 3.0392589      | 2.7383896      | 1.362E-06 | 2.054325  | up        | PREDICTED: putative late blight resistance protein homolog R1A-4 [Sesamum indicum]                 |
| c50235.graph_c0 | 0.4894218      | 0              | 0.2995231      | 4.4977414      | 6.4078501      | 6.900109       | 8.747E-21 | 4.529588  | up        | PREDICTED: dirigent protein 22-like [Sesamum indicum]                                              |
| c50239.graph_c0 | 3283.0768      | 4019.6129      | 3655.1871      | 691.99444      | 602.4768       | 613.48698      | 6.225E-32 | -2.476948 | down      | hypothetical protein MIMGU_mgv1a015957mg [Erythranthe guttata]                                     |
| c50240.graph_c0 | 320.32101      | 343.09762      | 310.24407      | 1298.9207      | 1529.586       | 1927.0961      | 1.079E-17 | 2.325391  | up        | hypothetical protein MIMGU_mgv1a027056mg [Erythranthe guttata]                                     |
| c50246.graph_c0 | 3.2772781      | 3.6988436      | 1.6045393      | 11.216317      | 14.962931      | 26.798715      | 0.0004295 | 2.6596    | up        | -                                                                                                  |
| c50255.graph_c0 | 1042.1833      | 1311.2389      | 1255.4256      | 187.37416      | 145.37308      | 119.03521      | 3.157E-49 | -2.948638 | down      | oleosin, partial [Genlisea aurea]                                                                  |
| c50256.graph_c0 | 3.8000062      | 5.1962993      | 4.2242428      | 10.82032       | 12.01747       | 11.336024      | 1.122E-09 | 1.411031  | up        | PREDICTED: probable indole-3-pyruvate monooxygenase YUCCA5 [Sesamum indicum]                       |
| c50257.graph_c0 | 44.359523      | 44.408581      | 43.453434      | 121.05259      | 134.29888      | 143.15502      | 4.284E-29 | 1.631276  | up        | PREDICTED: 5-methyltetrahydropteroyltriglutamate--homocysteine methyltransferase [Sesamum indicum] |
| c50260.graph_c0 | 21.08055       | 21.468311      | 26.535735      | 190.3623       | 132.32259      | 117.40709      | 1.05E-07  | 2.721802  | up        | hypothetical protein POPTR_0001s05450g [Populus trichocarpa]                                       |
| c50265.graph_c0 | 5.0773708      | 1.4586695      | 2.6365138      | 11.116626      | 40.28877       | 35.401183      | 0.0008322 | 3.265448  | up        | -                                                                                                  |
| c50266.graph_c0 | 2.8497496      | 4.4575489      | 3.8319517      | 1.2719252      | 1.0779604      | 0.6337808      | 4.4E-06   | -1.850424 | down      | -                                                                                                  |

| #ID             | 28 h-1<br>FPKM | 28 h-2<br>FPKM | 28 h-3<br>FPKM | 48 h-1<br>FPKM | 48 h-2<br>FPKM | 48 h-3<br>FPKM | FDR       | log2FC    | regulated | nr_annotation                                                                                     |
|-----------------|----------------|----------------|----------------|----------------|----------------|----------------|-----------|-----------|-----------|---------------------------------------------------------------------------------------------------|
| c50270.graph_c0 | 6.6901338      | 5.3222263      | 5.577129       | 1.0084607      | 1.1654638      | 0.9381096      | 3.009E-11 | -2.457786 | down      | hypothetical protein MIMGU_mgv1a025449mg [Erythranthe guttata]                                    |
| c50274.graph_c0 | 10.178188      | 10.940417      | 10.606359      | 4.2446834      | 2.7808709      | 3.0811502      | 8.801E-08 | -1.600321 | down      | PREDICTED: zinc finger protein MAGPIE-like [Sesamum indicum]                                      |
| c50277.graph_c0 | 34.319019      | 38.899809      | 49.307541      | 176.66806      | 113.72901      | 96.353968      | 0.0024764 | 1.710775  | up        | PREDICTED: serine carboxypeptidase-like 50 [Sesamum indicum]                                      |
| c50278.graph_c0 | 1.0785469      | 1.2029624      | 1.0612795      | 5.0664511      | 3.4929987      | 4.1503122      | 8.499E-08 | 1.975148  | up        | PREDICTED: probable carboxylesterase 6 [Sesamum indicum]                                          |
| c50293.graph_c0 | 1.4169042      | 0.767599       | 1.1561823      | 2.9454899      | 2.1309976      | 2.9404986      | 0.0023802 | 1.307933  | up        | PREDICTED: protein PROTON GRADIENT REGULATION 5, chloroplastic [Sesamum indicum]                  |
| c50295.graph_c0 | 32.001808      | 32.99935       | 32.042724      | 142.15777      | 121.42128      | 96.251147      | 5.686E-09 | 1.938017  | up        | PREDICTED: transcription factor MYB1R1-like [Sesamum indicum]                                     |
| c50297.graph_c0 | 358.93888      | 423.16367      | 384.38676      | 73.023882      | 86.402824      | 84.328613      | 3.206E-48 | -2.219412 | down      | PREDICTED: uncharacterized protein LOC100246645 [Vitis vinifera]                                  |
| c50303.graph_c0 | 10.12994       | 10.581835      | 9.2305862      | 15.036497      | 22.443408      | 25.379451      | 0.0001142 | 1.104088  | up        | PREDICTED: probable inactive receptor kinase At1g48480 [Sesamum indicum]                          |
| c50305.graph_c0 | 1.0571827      | 1.1335126      | 1.9050242      | 2.484689       | 3.9039767      | 4.8440221      | 0.0009127 | 1.486982  | up        | PREDICTED: DELLA protein GAI1 [Sesamum indicum]                                                   |
| c50306.graph_c0 | 0.2601444      | 0.352329       | 0.594372       | 4.4516546      | 4.9255877      | 6.8951706      | 3.453E-19 | 3.78932   | up        | PREDICTED: microtubule-associated protein RP/EB family member 1C [Sesamum indicum]                |
| c50309.graph_c0 | 6.8625853      | 6.8958501      | 6.141731       | 10.87354       | 14.045989      | 18.538953      | 0.0001663 | 1.16217   | up        | PREDICTED: uncharacterized protein LOC105167450 [Sesamum indicum]                                 |
| c50312.graph_c0 | 1.1933794      | 0.6687991      | 0.9066301      | 9.8586071      | 9.5598508      | 12.392373      | 6.391E-27 | 3.562198  | up        | -                                                                                                 |
| c50314.graph_c0 | 0.3170754      | 0.2862893      | 0.8336885      | 6.8325785      | 8.6102516      | 9.2981923      | 1.187E-29 | 4.140911  | up        | PREDICTED: syntaxin-112-like [Sesamum indicum]                                                    |
| c50329.graph_c0 | 1.6444382      | 1.8106994      | 1.9800442      | 0.3558811      | 0.7270963      | 0.7011776      | 0.000125  | -1.577129 | down      | PREDICTED: pentatricopeptide repeat-containing protein At2g17525, mitochondrial [Sesamum indicum] |
| c50349.graph_c0 | 6.3020433      | 8.3094316      | 8.4074418      | 23.711315      | 28.611781      | 33.057585      | 7.763E-12 | 1.928416  | up        | PREDICTED: RNA-binding protein 58-like isoform X1 [Nelumbo nucifera]                              |
| c50353.graph_c0 | 0.1325451      | 0.0897569      | 0.1622336      | 8.9465689      | 19.311584      | 18.499993      | 2.813E-17 | 6.954415  | up        | hypothetical protein MIMGU_mgv1a009974mg [Erythranthe guttata]                                    |
| c50372.graph_c0 | 1.7045459      | 1.3496242      | 1.0913181      | 4.321275       | 4.68351        | 4.1999717      | 3.268E-07 | 1.713262  | up        | PREDICTED: cytochrome P450 CYP82D47-like [Sesamum indicum]                                        |
| c50375.graph_c0 | 4.178805       | 5.609958       | 5.0699394      | 0.6969662      | 1.3290321      | 3.1007817      | 0.0005352 | -1.509248 | down      | -                                                                                                 |
| c50378.graph_c0 | 183.74221      | 191.36264      | 199.14526      | 59.784921      | 62.795854      | 62.892319      | 2.841E-27 | -1.589379 | down      | hypothetical protein MIMGU_mgv1a003144mg [Erythranthe guttata]                                    |
| c50379.graph_c0 | 7.5022577      | 7.724549       | 8.0818249      | 2.0437436      | 4.2418257      | 2.3380853      | 2.017E-06 | -1.401858 | down      | PREDICTED: uncharacterized protein LOC105165869 [Sesamum indicum]                                 |
| c50389.graph_c0 | 3.2530014      | 4.0385885      | 3.1521268      | 1.6107105      | 1.5698443      | 0.9172483      | 0.0018263 | -1.302449 | down      | PREDICTED: uncharacterized protein At1g08160-like [Sesamum indicum]                               |
| c50398.graph_c0 | 1.9478475      | 2.7553338      | 1.8013513      | 0.8230134      | 0.8718829      | 0.8055436      | 0.0033354 | -1.336881 | down      | -                                                                                                 |
| c50401.graph_c0 | 0.4694809      | 0.6023803      | 0.2217905      | 1.2215245      | 1.1613332      | 0.6967341      | 0.0082918 | 1.299975  | up        | PREDICTED: cytochrome P450 71A21-like [Sesamum indicum]                                           |
| c50423.graph_c0 | 2.6609918      | 2.7843517      | 3.1251171      | 0.8511316      | 1.0018564      | 1.9354035      | 0.0036267 | -1.144628 | down      | PREDICTED: pentatricopeptide repeat-containing protein At3g20730 [Sesamum indicum]                |
| c50427.graph_c0 | 4.5755351      | 3.2214141      | 3.6224802      | 10.529449      | 10.935238      | 11.365721      | 2.632E-11 | 1.564474  | up        | PREDICTED: geraniol 8-hydroxylase-like [Sesamum indicum]                                          |
| c50430.graph_c0 | 0.7253521      | 0.9005218      | 0.8878221      | 1.953804       | 2.5568346      | 2.2498016      | 0.0008117 | 1.465331  | up        | PREDICTED: uncharacterized protein LOC104084947 [Nicotiana tomentosiformis]                       |

| #ID             | 28 h-1<br>FPKM | 28 h-2<br>FPKM | 28 h-3<br>FPKM | 48 h-1<br>FPKM | 48 h-2<br>FPKM | 48 h-3<br>FPKM | FDR       | log2FC    | regulated | nr_annotation                                                                                     |
|-----------------|----------------|----------------|----------------|----------------|----------------|----------------|-----------|-----------|-----------|---------------------------------------------------------------------------------------------------|
| c50436.graph_c0 | 1.4255184      | 2.6546634      | 1.9629193      | 7.4536672      | 8.6140981      | 9.8478541      | 1.07E-07  | 2.139224  | up        | -                                                                                                 |
| c50439.graph_c0 | 9.5245554      | 8.4399333      | 9.9099706      | 2.9172859      | 2.7576865      | 2.3162375      | 1.765E-09 | -1.757961 | down      | PREDICTED: putative clathrin assembly protein At4g40080 [Sesamum indicum]                         |
| c50443.graph_c0 | 28.605785      | 27.345032      | 28.179826      | 54.483848      | 54.667219      | 63.078943      | 2.534E-12 | 1.0744    | up        | hypothetical protein MIMGU_mgv1a017588mg [Erythranthe guttata]                                    |
| c50446.graph_c0 | 1.0725259      | 0.9996287      | 0.7904783      | 4.0346617      | 12.54395       | 13.072347      | 0.0002317 | 3.397608  | up        | PREDICTED: short-chain dehydrogenase reductase 2a [Sesamum indicum]                               |
| c50451.graph_c0 | 0.6141723      | 0.6992026      | 0.6754759      | 1.69241        | 2.8686451      | 3.1925001      | 2.658E-06 | 1.994997  | up        | PREDICTED: premnaspirodiene oxygenase-like [Sesamum indicum]                                      |
| c50454.graph_c0 | 21.488192      | 23.055597      | 23.267997      | 4.4137272      | 4.9706796      | 4.3872629      | 1.645E-30 | -2.259016 | down      | PREDICTED: LOW QUALITY PROTEIN: putative ETHYLENE INSENSITIVE 3-like 4 protein [Sesamum indicum]  |
| c50456.graph_c0 | 0.8604348      | 0.7360029      | 0.5542956      | 2.9275732      | 3.1014088      | 6.0271092      | 0.0002809 | 2.522301  | up        | PREDICTED: haloacid dehalogenase-like hydrolase domain-containing protein Sgpp [Sesamum indicum]  |
| c50460.graph_c0 | 2.7152389      | 3.5769335      | 2.1429697      | 1.0438141      | 1.0759081      | 0.5522472      | 4.657E-05 | -1.611166 | down      | unnamed protein product [Coffea canephora]                                                        |
| c50463.graph_c0 | 1.7235822      | 1.8526585      | 1.5180504      | 7.733383       | 5.9148234      | 4.7211256      | 1.03E-05  | 1.900353  | up        | PREDICTED: putative E3 ubiquitin-protein ligase XBAT31 [Sesamum indicum]                          |
| c50472.graph_c0 | 0.3433444      | 0.1377812      | 0.2801662      | 35.445785      | 41.39265       | 38.20877       | 1.3E-164  | 7.278487  | up        | PREDICTED: 1-aminocyclopropane-1-carboxylate oxidase homolog 1-like [Sesamum indicum]             |
| c50477.graph_c0 | 4.3868254      | 6.0880378      | 2.6515657      | 0.205949       | 0              | 0.1832522      | 1.323E-07 | -5.013317 | down      | --                                                                                                |
| c50482.graph_c0 | 287.13434      | 236.65841      | 283.59505      | 1003.0008      | 905.32091      | 867.86486      | 7.732E-29 | 1.826069  | up        | PREDICTED: putative lipid-binding protein AIR1B [Beta vulgaris subsp. vulgaris]                   |
| c50491.graph_c0 | 16.63514       | 19.00254       | 16.110719      | 29.765712      | 35.425449      | 38.56722       | 4.328E-10 | 1.042031  | up        | PREDICTED: adenine phosphoribosyltransferase 1-like [Sesamum indicum]                             |
| c50495.graph_c0 | 1.3402667      | 1.9286529      | 1.4695877      | 11.255125      | 14.735572      | 17.573038      | 1.334E-21 | 3.23678   | up        | PREDICTED: glycerophosphodiester phosphodiesterase GDPDL3-like [Sesamum indicum]                  |
| c50500.graph_c0 | 0.0592923      | 0              | 0.0645093      | 2.5553489      | 2.335522       | 2.095402       | 7.578E-28 | 5.860804  | up        | PREDICTED: uncharacterized protein LOC105175608 [Sesamum indicum]                                 |
| c50510.graph_c0 | 1.1769548      | 1.1192053      | 1.5529637      | 1.9680078      | 2.5724551      | 3.219804       | 0.0004917 | 1.046345  | up        | PREDICTED: probable RNA-dependent RNA polymerase 5 [Sesamum indicum]                              |
| c50511.graph_c0 | 0.6559054      | 0.3230297      | 0.5352134      | 2.4186425      | 4.2437406      | 3.2953933      | 1.199E-09 | 2.750392  | up        | hypothetical protein MIMGU_mgv1a014011mg [Erythranthe guttata]                                    |
| c50514.graph_c0 | 0.8992081      | 0.5535686      | 0.4669295      | 4.5592498      | 5.0495165      | 6.9610881      | 1.045E-15 | 3.147295  | up        | PREDICTED: auxin-induced protein 6B-like [Sesamum indicum]                                        |
| c50516.graph_c0 | 22.30658       | 25.191922      | 26.8696        | 49.459216      | 48.497244      | 54.191972      | 8.258E-13 | 1.074139  | up        | ferritin [Avicennia marina]                                                                       |
| c50517.graph_c0 | 1.7680457      | 1.8829092      | 1.4427109      | 0.1149296      | 0.6696472      | 0.9715053      | 0.0014093 | -1.517137 | down      | -                                                                                                 |
| c50523.graph_c0 | 0.732406       | 0.9919409      | 1.0085129      | 3.3653722      | 3.6881418      | 4.2852155      | 4.515E-07 | 2.091795  | up        | PREDICTED: RAN GTPase-activating protein 2-like isoform X2 [Sesamum indicum]                      |
| c50524.graph_c0 | 0.8676912      | 1.333972       | 1.0142037      | 0.2378081      | 0.4093844      | 0.2909503      | 0.000107  | -1.742319 | down      | PREDICTED: pentatricopeptide repeat-containing protein At5g46460, mitochondrial [Sesamum indicum] |
| c50528.graph_c0 | 4.5605744      | 4.5512207      | 4.7659926      | 44.624213      | 55.439442      | 74.990868      | 5.862E-17 | 3.692444  | up        | hypothetical protein CICLE_v10032302mg [Citrus clementina]                                        |
| c50533.graph_c0 | 0.8741685      | 0.7498276      | 0.9808072      | 2.4377605      | 2.4651248      | 2.9085721      | 1.287E-05 | 1.624439  | up        | hypothetical protein MIMGU_mgv1a002430mg [Erythranthe guttata]                                    |

| #ID             | 28 h-1<br>FPKM | 28 h-2<br>FPKM | 28 h-3<br>FPKM | 48 h-1<br>FPKM | 48 h-2<br>FPKM | 48 h-3<br>FPKM | FDR       | log2FC    | regulated | nr_annotation                                                                                         |
|-----------------|----------------|----------------|----------------|----------------|----------------|----------------|-----------|-----------|-----------|-------------------------------------------------------------------------------------------------------|
| c50536.graph_c0 | 1.4288758      | 1.3175907      | 2.4559393      | 0.1541451      | 0.2449471      | 0.2057361      | 8.69E-06  | -3.070803 | down      | PREDICTED: mitogen-activated protein kinase kinase kinase 2-like [Sesamum indicum]                    |
| c50538.graph_c0 | 1.543287       | 2.1015869      | 2.4360416      | 68.500119      | 117.9223       | 135.65591      | 1.126E-19 | 5.758238  | up        | PREDICTED: beta-glucosidase 12-like [Sesamum indicum]                                                 |
| c50540.graph_c0 | 3.6335696      | 3.9939841      | 3.1798155      | 0.6675097      | 2.1214368      | 1.4254707      | 0.001957  | -1.33236  | down      | -                                                                                                     |
| c50542.graph_c0 | 1.4037581      | 1.0139696      | 1.099637       | 4.341655       | 4.599457       | 4.1165017      | 3.227E-06 | 1.93417   | up        | hypothetical protein L484_017688 [Morus notabilis]                                                    |
| c50555.graph_c0 | 0.0984059      | 0.3554052      | 0.3211936      | 3.9915748      | 2.7750119      | 4.3286091      | 5.752E-14 | 3.884702  | up        | hypothetical protein MIMGU_mgv1a016013mg [Erythranthe guttata]                                        |
| c50565.graph_c0 | 0              | 0.1067748      | 0.0964966      | 6.0709193      | 18.738408      | 17.606087      | 4.428E-10 | 7.730125  | up        | PREDICTED: pathogenesis-related protein PR-1-like [Sesamum indicum]                                   |
| c50569.graph_c0 | 0              | 0.165236       | 0.0497768      | 4.3301405      | 10.157502      | 10.664368      | 9.342E-12 | 6.900409  | up        | unnamed protein product [Coffea canephora]                                                            |
| c50572.graph_c0 | 0.4185125      | 0.6870501      | 0.6519598      | 2.1219816      | 2.4523442      | 2.7892777      | 1.015E-06 | 2.105205  | up        | PREDICTED: glyoxylate/succinic semialdehyde reductase 1 [Sesamum indicum]                             |
| c50577.graph_c0 | 0.5950799      | 0.9919409      | 1.2699793      | 2.3209463      | 4.179894       | 4.8531356      | 0.000107  | 2.020922  | up        | PREDICTED: uncharacterized protein LOC105168308 [Sesamum indicum]                                     |
| c50578.graph_c0 | 8.8249637      | 8.4219947      | 7.7935937      | 3.5399656      | 3.6001578      | 3.1498401      | 0.0003868 | -1.239964 | down      | PREDICTED: stachyose synthase [Sesamum indicum]                                                       |
| c50581.graph_c0 | 7.6150427      | 5.5701627      | 7.9442415      | 31.157215      | 33.654493      | 41.204735      | 1.872E-19 | 2.365312  | up        | -                                                                                                     |
| c50587.graph_c0 | 1.1046606      | 0.2992215      | 0.5408364      | 8.8215039      | 10.087005      | 12.833017      | 1.5E-18   | 4.06578   | up        | PREDICTED: 1-deoxyloganetin glucosyltransferase-like [Eucalyptus grandis]                             |
| c50590.graph_c0 | 114.47406      | 120.87986      | 103.22909      | 259.17377      | 303.59343      | 287.63247      | 3.427E-18 | 1.368423  | up        | PREDICTED: uncharacterized protein At1g01500 [Sesamum indicum]                                        |
| c50592.graph_c0 | 14.278536      | 16.006582      | 15.103973      | 29.105991      | 31.938377      | 31.982748      | 4.339E-13 | 1.075717  | up        | PREDICTED: dihydrolipoyl dehydrogenase 2, chloroplastic-like isoform X1 [Sesamum indicum]             |
| c50596.graph_c0 | 2.0829777      | 2.790766       | 1.8641792      | 0.4258593      | 0.9925218      | 0.5304979      | 0.0001205 | -1.757986 | down      | -                                                                                                     |
| c50601.graph_c0 | 1.7614694      | 2.3588574      | 2.147942       | 12.317989      | 10.046189      | 12.634679      | 5.715E-29 | 2.52538   | up        | PREDICTED: protein CYPRO4 [Sesamum indicum]                                                           |
| c50603.graph_c0 | 0.7697799      | 0.843976       | 0.4486672      | 1.6727189      | 1.6982077      | 1.5503908      | 0.0031023 | 1.298296  | up        | PREDICTED: L-type lectin-domain containing receptor kinase IX.1-like [Nicotiana sylvestris]           |
| c50608.graph_c0 | 10.062266      | 14.78161       | 12.707077      | 5.1626016      | 4.9329592      | 6.9355136      | 0.0014745 | -1.100549 | down      | PREDICTED: palmitoyl-monogalactosyldiacylglycerol delta-7 desaturase, chloroplastic [Sesamum indicum] |
| c50620.graph_c0 | 0.3727936      | 0.5289392      | 0.9125897      | 2.9702727      | 4.4339071      | 4.5049956      | 4.593E-10 | 2.748126  | up        | PREDICTED: zinc finger protein ZAT5 [Sesamum indicum]                                                 |
| c50627.graph_c0 | 0.0469941      | 0.0424312      | 0.0766935      | 6.4929591      | 8.5192467      | 8.5335849      | 1.423E-38 | 7.183068  | up        | hypothetical protein MIMGU_mgv1a009322mg [Erythranthe guttata]                                        |
| c50628.graph_c0 | 1.8805164      | 1.8919791      | 1.7536983      | 0.4767386      | 1.2265421      | 0.484799       | 0.0034952 | -1.305931 | down      | -                                                                                                     |
| c50630.graph_c0 | 211.5804       | 212.36205      | 202.32798      | 1587.4866      | 1130.546       | 944.98423      | 4.206E-07 | 2.599082  | up        | hypothetical protein AMTR_s00033p00173430 [Amborella trichopoda]                                      |
| c50634.graph_c0 | 3.3007868      | 3.4609947      | 3.6925852      | 1.3496743      | 1.3583255      | 1.291002       | 0.0002308 | -1.344064 | down      | PREDICTED: anthocyanidin 3-O-glucosyltransferase-like [Sesamum indicum]                               |
| c50639.graph_c0 | 17.05187       | 16.911931      | 20.258479      | 6.3835572      | 6.7626048      | 5.0821507      | 1.1E-06   | -1.529725 | down      | -                                                                                                     |
| c50650.graph_c0 | 0.7860249      | 0.7514542      | 1.0564069      | 2.2271228      | 2.607721       | 2.1902784      | 0.0001778 | 1.477274  | up        | PREDICTED: asparagine--tRNA ligase, cytoplasmic 2 [Sesamum indicum]                                   |
| c50653.graph_c0 | 0.903917       | 0.6872862      | 0.8928708      | 2.4724756      | 2.8748284      | 2.0926771      | 0.0002123 | 1.623855  | up        | unnamed protein product [Coffea canephora]                                                            |

| #ID             | 28 h-1<br>FPKM | 28 h-2<br>FPKM | 28 h-3<br>FPKM | 48 h-1<br>FPKM | 48 h-2<br>FPKM | 48 h-3<br>FPKM | FDR       | log2FC    | regulated | nr_annotation                                                                                                                            |
|-----------------|----------------|----------------|----------------|----------------|----------------|----------------|-----------|-----------|-----------|------------------------------------------------------------------------------------------------------------------------------------------|
| c50654.graph_c0 | 7.804128       | 8.1367473      | 7.7353381      | 1.4924564      | 2.574317       | 3.0475409      | 9.798E-15 | -1.703198 | down      | PREDICTED: pentatricopeptide repeat-containing protein At1g15510, chloroplastic [Sesamum indicum]                                        |
| c50684.graph_c0 | 11.511938      | 12.150218      | 11.846255      | 2.9881698      | 5.5134263      | 6.3147819      | 5.644E-10 | -1.230343 | down      | PREDICTED: leucine-rich repeat receptor-like protein CLAVATA2 [Sesamum indicum]                                                          |
| c50686.graph_c0 | 0.2091227      | 0.314697       | 0.3697253      | 8.7034098      | 11.466755      | 11.911194      | 1.508E-46 | 5.202353  | up        | PREDICTED: PI-PLC X-box domain-containing protein DDB_G0293730 [Sesamum indicum]                                                         |
| c50691.graph_c0 | 0.5880363      | 0.4344068      | 0.3053481      | 3.1848023      | 1.8664193      | 1.688232       | 0.0005673 | 2.398524  | up        | Leucine-rich repeat transmembrane protein kinase [Theobroma cacao]                                                                       |
| c50695.graph_c0 | 0.8799273      | 1.0262187      | 1.166772       | 0.1858955      | 0.344634       | 0.5375781      | 0.0012541 | -1.496222 | down      | -                                                                                                                                        |
| c50696.graph_c0 | 3.5917603      | 2.6592787      | 2.989464       | 15.843816      | 18.713867      | 26.007886      | 2.915E-12 | 2.748506  | up        | PREDICTED: (RS)-norcochlorine 6-O-methyltransferase-like [Sesamum indicum]                                                               |
| c50700.graph_c0 | 29.308894      | 38.576612      | 27.705296      | 113.28494      | 142.73904      | 108.2497       | 3.346E-20 | 1.97043   | up        | -                                                                                                                                        |
| c50706.graph_c0 | 1.027825       | 0.9280296      | 1.2056267      | 5.9442254      | 4.6581924      | 4.9993203      | 2.932E-08 | 2.349049  | up        | PREDICTED: uncharacterized protein LOC105155422 [Sesamum indicum]                                                                        |
| c50708.graph_c0 | 3.0111048      | 4.1788123      | 4.5273181      | 6.1139435      | 10.632733      | 13.081517      | 0.0033007 | 1.378842  | up        | PREDICTED: UPF0496 protein 1-like [Sesamum indicum]                                                                                      |
| c50709.graph_c0 | 0.3824305      | 0.1726494      | 0.6241203      | 13.815625      | 8.2166905      | 4.9603577      | 0.0001395 | 4.572261  | up        | -                                                                                                                                        |
| c50710.graph_c0 | 3.7279642      | 3.5726865      | 3.682407       | 0.6632238      | 1.8882513      | 1.5490978      | 0.0003372 | -1.394943 | down      | PREDICTED: multiple C2 and transmembrane domain-containing protein 1-like [Sesamum indicum]                                              |
| c50711.graph_c0 | 1.94236        | 1.7147963      | 1.1622966      | 3.994048       | 3.4197447      | 2.7749473      | 0.0057842 | 1.127761  | up        | -                                                                                                                                        |
| c50713.graph_c0 | 1.4528208      | 2.01449        | 1.8205738      | 0.1315398      | 0.1393505      | 0.4096517      | 7.325E-09 | -2.926658 | down      | -                                                                                                                                        |
| c50732.graph_c0 | 6.828738       | 8.6457723      | 7.5333578      | 14.700571      | 19.261926      | 17.813548      | 3.002E-08 | 1.208014  | up        | PREDICTED: neat stress transcription factor C-1-like [Sesamum indicum]                                                                   |
| c50735.graph_c0 | 7.2772061      | 6.0074375      | 7.0409383      | 27.541407      | 23.034301      | 13.71877       | 0.0015781 | 1.71119   | up        | PREDICTED: uncharacterized protein LOC104450150 [Eucalyptus grandis]                                                                     |
| c50746.graph_c0 | 4.4087976      | 4.3426155      | 3.4885264      | 7.3496923      | 8.1807953      | 9.2520349      | 2.773E-05 | 1.057119  | up        | hypothetical protein MIMGU_mgv1a005428mg [Erythranthe guttata]                                                                           |
| c50748.graph_c0 | 5.4377053      | 4.3865692      | 3.8188354      | 9.8305606      | 11.31207       | 11.009374      | 7.501E-06 | 1.276632  | up        | hypothetical protein MIMGU_mgv1a006779mg [Erythranthe guttata]                                                                           |
| c50751.graph_c0 | 5.5693423      | 4.7076198      | 5.2213839      | 0.6008129      | 0.7956105      | 1.2028493      | 1.371E-07 | -2.542472 | down      | -                                                                                                                                        |
| c50753.graph_c0 | 1.6984559      | 1.4289864      | 1.4174244      | 3.6697464      | 2.9027797      | 3.918382       | 0.0013522 | 1.250832  | up        | PREDICTED: probable WRKY transcription factor 14 [Sesamum indicum]                                                                       |
| c50754.graph_c0 | 0.6792515      | 0.7199614      | 0.45787        | 9.6956236      | 11.064491      | 14.756018      | 5.472E-28 | 4.295241  | up        | PREDICTED: chaperonin CPN60, mitochondrial [Sesamum indicum]                                                                             |
| c50763.graph_c0 | 26.024935      | 29.031686      | 28.058846      | 55.822462      | 56.286085      | 65.001194      | 2.912E-15 | 1.132212  | up        | PREDICTED: aminopyruvate-lysine-residue acetyltransferase component 5 of pyruvate dehydrogenase complex, chloroplastic [Sesamum indicum] |
| c50764.graph_c0 | 0.4500795      | 0.8127592      | 1.0099684      | 6.9887346      | 8.612487       | 6.7261695      | 1.393E-12 | 3.335776  | up        | PREDICTED: uncharacterized protein LOC100267736 [Vitis vinifera]                                                                         |
| c50767.graph_c0 | 3.9443212      | 3.6281276      | 3.7817773      | 1.0936882      | 1.6551858      | 1.5570515      | 0.0001048 | -1.363911 | down      | PREDICTED: uncharacterized protein LOC102659506 [Glycine max]                                                                            |
| c50769.graph_c0 | 2.0388226      | 1.8950088      | 2.1529751      | 0.3040421      | 0.4831436      | 0.6087034      | 8.892E-06 | -2.092543 | down      | -                                                                                                                                        |
| c50770.graph_c0 | 8.7868418      | 10.767157      | 12.97427       | 21.215179      | 23.130428      | 24.304317      | 1.087E-05 | 1.117233  | up        | cyclin D [Scutellaria baicalensis]                                                                                                       |
| c50772.graph_c0 | 2.2687535      | 2.2848338      | 1.9936908      | 32.297582      | 48.862364      | 69.581861      | 6.821E-11 | 4.557298  | up        | PREDICTED: uncharacterized protein LOC105158508 [Sesamum indicum]                                                                        |

| #ID             | 28 h-1<br>FPKM | 28 h-2<br>FPKM | 28 h-3<br>FPKM | 48 h-1<br>FPKM | 48 h-2<br>FPKM | 48 h-3<br>FPKM | FDR       | log2FC    | regulated | nr_annotation                                                                       |
|-----------------|----------------|----------------|----------------|----------------|----------------|----------------|-----------|-----------|-----------|-------------------------------------------------------------------------------------|
| c50775.graph_c0 | 1.0122472      | 1.0752521      | 0.6316359      | 3.8492936      | 5.0373562      | 5.1040382      | 1.144E-08 | 2.401056  | up        | kunitz trypsin inhibitor [Populus tremula]                                          |
| c50777.graph_c0 | 4.0922528      | 4.452853       | 3.8957857      | 1.2635565      | 1.9726514      | 1.4201747      | 0.0008929 | -1.381413 | down      | hypothetical protein CICLE_v10023373mg [Citrus clementina]                          |
| c50781.graph_c0 | 0.4723926      | 0.4653013      | 0.1752129      | 2.9939618      | 3.1140715      | 4.7467801      | 1.931E-12 | 3.324862  | up        | PREDICTED: glutaminyl-peptide cyclotransferase [Sesamum indicum]                    |
| c50792.graph_c0 | 0.4475532      | 0.5317086      | 0.6535153      | 11.137125      | 8.8567327      | 12.300838      | 3.787E-37 | 4.349057  | up        | PREDICTED: cell division cycle 20.2, cofactor of APC complex-like [Sesamum indicum] |
| c50794.graph_c0 | 3.8818556      | 2.9207931      | 5.9493321      | 0.1261676      | 0.2339038      | 0.280658       | 1.603E-08 | -4.28583  | down      | PREDICTED: cytochrome P450 86B1-like [Sesamum indicum]                              |
| c50795.graph_c0 | 8.8879849      | 8.3897906      | 8.6011328      | 52.699631      | 54.004074      | 66.650998      | 5.223E-48 | 2.783647  | up        | PREDICTED: caffeoylshikimate esterase [Sesamum indicum]                             |
| c50796.graph_c0 | 2.5357558      | 2.4474497      | 4.0669618      | 5.4309864      | 10.919854      | 10.552513      | 0.0009153 | 1.601198  | up        | PREDICTED: glucomannan 4-beta-mannosyltransferase 2-like [Sesamum indicum]          |
| c50807.graph_c0 | 0.3860197      | 0.1161799      | 0.8924687      | 4.2406732      | 3.8877222      | 4.498965       | 4.932E-12 | 3.218301  | up        | PREDICTED: uncharacterized protein LOC105159678 [Sesamum indicum]                   |
| c50809.graph_c0 | 0.0899949      | 0.4062847      | 0.3304579      | 7.5289584      | 4.3505555      | 3.5526177      | 5.125E-06 | 4.278326  | up        | -                                                                                   |
| c50814.graph_c0 | 9.315657       | 10.490329      | 12.341761      | 3.6486263      | 3.5841661      | 2.3020819      | 6.245E-08 | -1.707721 | down      | -                                                                                   |
| c50815.graph_c0 | 0.0574447      | 0              | 0.0468744      | 5.9708608      | 1.6970593      | 2.5268366      | 0.0003631 | 6.673278  | up        | PREDICTED: acid phosphatase 1-like [Nicotiana glauca]                               |
| c50825.graph_c0 | 1.4262356      | 1.4048258      | 1.375396       | 3.533542       | 3.6563044      | 3.9484353      | 0.0007022 | 1.445695  | up        | hypothetical protein MIMGU_mgv1a000817mg [Erythranthe guttata]                      |
| c50826.graph_c0 | 1.547371       | 1.9051785      | 0.9948089      | 8.499429       | 12.278338      | 11.370554      | 1.311E-18 | 2.890642  | up        | PREDICTED: adenosine kinase 2-like [Sesamum indicum]                                |
| c50827.graph_c0 | 1.0475701      | 1.6552508      | 0.3205532      | 4.4815689      | 7.5611182      | 6.4984302      | 4.064E-09 | 2.65246   | up        | -                                                                                   |
| c50830.graph_c0 | 4.1862454      | 3.7219332      | 4.54878        | 10.450309      | 15.717144      | 19.65719       | 3.472E-06 | 1.911913  | up        | PREDICTED: delta(8)-fatty-acid desaturase 2-like [Sesamum indicum]                  |
| c50834.graph_c0 | 0.9639295      | 1.3055069      | 0.9438703      | 5.4983321      | 5.3070547      | 6.0882986      | 3.213E-08 | 2.436511  | up        | PREDICTED: receptor-like protein kinase HSL1 [Sesamum indicum]                      |
| c50851.graph_c0 | 14.46353       | 14.109953      | 14.605692      | 2.8799892      | 5.655511       | 6.8127581      | 7.277E-07 | -1.462908 | down      | PREDICTED: fibroin heavy chain [Sesamum indicum]                                    |
| c50852.graph_c0 | 4.6325527      | 4.4302614      | 3.9814337      | 1.1813696      | 2.0981328      | 1.4530956      | 3.711E-05 | -1.42836  | down      | PREDICTED: F-box/kelch-repeat protein At5g23880-like [Sesamum indicum]              |
| c50857.graph_c0 | 2.0248846      | 1.747024       | 1.5054191      | 4.049667       | 4.4109799      | 3.4003626      | 0.0024854 | 1.211148  | up        | PREDICTED: uncharacterized protein LOC105165400 [Sesamum indicum]                   |
| c50869.graph_c0 | 5.5325302      | 6.4153558      | 6.6227937      | 10.501535      | 14.632339      | 12.385028      | 1.58E-06  | 1.051672  | up        | PREDICTED: cationic amino acid transporter 8, vacuolar [Sesamum indicum]            |
| c50874.graph_c0 | 474.82047      | 449.09472      | 446.16687      | 142.04915      | 152.56188      | 96.141254      | 4.852E-35 | -1.765631 | down      | hypothetical protein JCGZ_21814 [Jatropha curcas]                                   |
| c50881.graph_c0 | 1.9278589      | 3.3943179      | 2.8316108      | 4.2764805      | 6.4720179      | 7.5016537      | 0.0044266 | 1.196176  | up        | PREDICTED: cationic amino acid transporter 8, vacuolar [Sesamum indicum]            |
| c50885.graph_c0 | 4.7050677      | 3.7607326      | 4.2484022      | 1.075479       | 0.9321869      | 1.3049383      | 2.19E-06  | -1.898783 | down      | hypothetical protein MIMGU_mgv1a010676mg [Erythranthe guttata]                      |
| c50891.graph_c0 | 0.0387779      | 0.1400514      | 0.0949274      | 8.356162       | 12.497422      | 11.852684      | 4.294E-51 | 6.93637   | up        | PREDICTED: annexin D4 [Sesamum indicum]                                             |
| c50893.graph_c0 | 2.6444279      | 3.9157796      | 3.1072775      | 1.2067226      | 0.8522508      | 0.2386077      | 8.365E-06 | -2.014519 | down      | -                                                                                   |
| c50894.graph_c0 | 33.53445       | 35.08207       | 29.356523      | 13.984875      | 12.355826      | 5.5086546      | 1.327E-11 | -1.570104 | down      | PREDICTED: auxin-induced protein X15-like [Sesamum indicum]                         |
| c50899.graph_c0 | 0.4903737      | 0.4743873      | 0.6859559      | 6.3934437      | 11.946958      | 8.8493187      | 1.147E-13 | 4.074191  | up        | PREDICTED: annexin D1-like [Sesamum indicum]                                        |
| c50901.graph_c0 | 1.9527958      | 1.2734161      | 1.5049396      | 3.025382       | 4.0791232      | 5.8733819      | 0.0007182 | 1.489313  | up        | hypothetical protein MIMGU_mgv1a012192mg [Erythranthe guttata]                      |

| #ID             | 28 h-1<br>FPKM | 28 h-2<br>FPKM | 28 h-3<br>FPKM | 48 h-1<br>FPKM | 48 h-2<br>FPKM | 48 h-3<br>FPKM | FDR       | log2FC    | regulated | nr_annotation                                                                         |
|-----------------|----------------|----------------|----------------|----------------|----------------|----------------|-----------|-----------|-----------|---------------------------------------------------------------------------------------|
| c50914.graph_c0 | 0.2247464      | 0.3478713      | 0.6549687      | 20.145272      | 16.512695      | 9.5600755      | 8.007E-11 | 5.283904  | up        | PREDICTED: probable trehalose-phosphate phosphatase H [Sesamum indicum]               |
| c50920.graph_c0 | 3.1994789      | 3.8744301      | 4.3307713      | 6.6320582      | 13.748448      | 15.198685      | 0.0017809 | 1.670346  | up        | PREDICTED: DNA-damage-repair/toleration protein DRT100-like [Sesamum indicum]         |
| c50925.graph_c0 | 0.2641625      | 0.5366564      | 0.538886       | 2.5950518      | 7.0058797      | 4.2456936      | 0.0001439 | 3.397816  | up        | PREDICTED: transcription factor RAX2-like [Sesamum indicum]                           |
| c50929.graph_c0 | 0.2063416      | 0.0931536      | 0.0841865      | 1.3077659      | 1.0737         | 0.7854585      | 6.942E-09 | 3.0942    | up        | PREDICTED: protein HOTHEAD [Sesamum indicum]                                          |
| c50930.graph_c0 | 3.6796648      | 3.4995866      | 4.1235383      | 8.2090732      | 11.134178      | 12.671999      | 3.718E-07 | 1.537265  | up        | PREDICTED: NADPH:quinone oxidoreductase [Sesamum indicum]                             |
| c50940.graph_c0 | 1.8298158      | 1.9394829      | 1.8177049      | 0.3630406      | 0.726462       | 0.7716861      | 6.254E-05 | -1.555863 | down      | LINE-1 reverse transcriptase like [Glycine soja]                                      |
| c50945.graph_c0 | 606.19219      | 678.56701      | 653.64873      | 123.7218       | 145.19061      | 99.291464      | 1.382E-57 | -2.354328 | down      | hypothetical protein POPTR_0011s11140g [Populus trichocarpa]                          |
| c50961.graph_c0 | 8.6803417      | 8.279086       | 9.9761802      | 0.3099429      | 0.9850407      | 0.827356       | 2.57E-13  | -3.641002 | down      | -                                                                                     |
| c50962.graph_c0 | 11.365747      | 11.914593      | 13.38756       | 22.587123      | 25.22174       | 30.671909      | 7.504E-11 | 1.135955  | up        | PREDICTED: adenylyl-sulfate kinase 3-like isoform X2 [Sesamum indicum]                |
| c50966.graph_c0 | 3.0824134      | 3.2801178      | 3.5332911      | 10.465677      | 11.629152      | 14.320242      | 3.771E-13 | 1.917832  | up        | hypothetical protein MIMGU_mgv1a009312mg [Erythranthe guttata]                        |
| c50969.graph_c0 | 3.3771174      | 2.1211968      | 3.4745786      | 4.6529838      | 9.4642024      | 7.2867467      | 0.0045433 | 1.284913  | up        | -                                                                                     |
| c50975.graph_c0 | 0.6470364      | 0.8178984      | 0.7655658      | 3.936798       | 3.2582501      | 2.7366712      | 5.164E-08 | 2.202313  | up        | PREDICTED: putative cyclin-A3-1 [Sesamum indicum]                                     |
| c50982.graph_c0 | 2.279552       | 2.1628771      | 2.3960556      | 11.998771      | 20.960581      | 21.17856       | 2.515E-11 | 3.016908  | up        | PREDICTED: hevamine-A [Sesamum indicum]                                               |
| c50986.graph_c0 | 1.4693191      | 1.6706056      | 1.1989524      | 3.104117       | 4.2384281      | 4.2964828      | 0.0003823 | 1.460343  | up        | PREDICTED: polyadenylate-binding protein-interacting protein 8-like [Sesamum indicum] |
| c50987.graph_c0 | 55.139709      | 54.300741      | 53.377444      | 25.2659        | 20.787463      | 14.524096      | 2.56E-15  | -1.377187 | down      | unnamed protein product [Coffea canephora]                                            |
| c51000.graph_c0 | 1.6070881      | 0.9942379      | 1.2628015      | 3.3197227      | 3.037274       | 3.2224028      | 0.0003445 | 1.352882  | up        | PREDICTED: polygalacturonase-like [Sesamum indicum]                                   |
| c51005.graph_c0 | 0.1524457      | 0.2477595      | 0.1492733      | 1.4299472      | 2.2108704      | 2.3727765      | 1.135E-13 | 3.486674  | up        | PREDICTED: protein BRANCHLESS TRICHOME [Sesamum indicum]                              |
| c51013.graph_c0 | 0.0336362      | 0.0303703      | 0.0274468      | 4.2636311      | 7.0462083      | 10.053446      | 1.744E-14 | 7.898787  | up        | PREDICTED: putative pectate lyase 2 [Sesamum indicum]                                 |
| c51016.graph_c0 | 0.8713447      | 1.4790761      | 1.6495436      | 3.1809417      | 3.2294127      | 3.8524654      | 0.0003836 | 1.399378  | up        | PREDICTED: cell wall / vacuolar inhibitor of fructosidase 1-like [Malus domestica]    |
| c51021.graph_c0 | 3.1682628      | 3.3007434      | 4.3750834      | 7.4141657      | 10.254368      | 11.636516      | 7.046E-05 | 1.468879  | up        | -                                                                                     |
| c51022.graph_c0 | 33.535799      | 42.954897      | 33.81979       | 16.735308      | 13.39028       | 11.686589      | 4.949E-10 | -1.351249 | down      | PREDICTED: uncharacterized protein LOC105178345 [Sesamum indicum]                     |
| c51025.graph_c0 | 7.9010703      | 8.0337         | 6.6214577      | 0.9624205      | 2.0709972      | 1.1507284      | 7.779E-17 | -2.398103 | down      | hypothetical protein MIMGU_mgv1a027162mg [Erythranthe guttata]                        |
| c51026.graph_c0 | 2.4873088      | 2.0505191      | 2.6473352      | 27.895843      | 40.37115       | 51.655665      | 3.453E-15 | 4.094042  | up        | PREDICTED: uncharacterized protein LOC105161197 [Sesamum indicum]                     |
| c51029.graph_c0 | 0.6899377      | 0.6832345      | 0.5448228      | 0.141056       | 0.2988634      | 0.1506129      | 0.000263  | -1.666365 | down      | PREDICTED: uncharacterized protein LOC104606652 [Nelumbo nucifera]                    |
| c51031.graph_c0 | 0.9470763      | 1.2521415      | 0.9660081      | 3.3870937      | 5.0416693      | 5.6461356      | 2.341E-09 | 2.187211  | up        | PREDICTED: uncharacterized protein C594.04c [Sesamum indicum]                         |
| c51035.graph_c0 | 1.2121587      | 1.5687341      | 1.3188155      | 16.696638      | 10.41751       | 9.6613267      | 6.216E-07 | 3.218193  | up        | PREDICTED: uncharacterized protein LOC105158187 [Sesamum indicum]                     |
| c51046.graph_c1 | 8.0593899      | 11.804706      | 14.760356      | 28.604437      | 33.669925      | 26.462058      | 4.715E-05 | 1.398115  | up        | -                                                                                     |

| #ID             | 28 h-1<br>FPKM | 28 h-2<br>FPKM | 28 h-3<br>FPKM | 48 h-1<br>FPKM | 48 h-2<br>FPKM | 48 h-3<br>FPKM | FDR       | log2FC    | regulated | nr_annotation                                                                                 |
|-----------------|----------------|----------------|----------------|----------------|----------------|----------------|-----------|-----------|-----------|-----------------------------------------------------------------------------------------------|
| c51047.graph_c0 | 0.6458686      | 0.9476331      | 0.9552302      | 4.5539413      | 4.1196685      | 6.9203885      | 1.443E-08 | 2.652215  | up        | PREDICTED: uncharacterized protein LOC105160227 isoform X1 [Sesamum indicum]                  |
| c51050.graph_c0 | 23.897905      | 23.252639      | 20.357003      | 66.865964      | 74.114325      | 80.861865      | 1.222E-34 | 1.756052  | up        | PREDICTED: protein TRANSPARENT TESTA 12-like [Sesamum indicum]                                |
| c51055.graph_c0 | 0.8108071      | 1.1544382      | 0.788845       | 1.38352        | 2.2194457      | 2.4620956      | 0.0046015 | 1.172489  | up        | PREDICTED: uncharacterized protein PB18E9.04c [Sesamum indicum]                               |
| c51057.graph_c0 | 7.2264468      | 8.4160515      | 9.5714901      | 1.8585616      | 1.5470091      | 0.9449925      | 1.07E-08  | -2.485252 | down      | PREDICTED: uncharacterized protein LOC105111158 [Sesamum indicum]                             |
| c51058.graph_c0 | 75.864935      | 81.796288      | 60.521591      | 25.299955      | 31.876444      | 29.560329      | 5.906E-11 | -1.291995 | down      | PREDICTED: heme-binding-like protein At3g10130, chloroplastic [Sesamum indicum]               |
| c51060.graph_c0 | 2.3959336      | 2.1196003      | 1.7378331      | 4.2947789      | 7.9946442      | 9.1715243      | 0.0002126 | 1.809792  | up        | PREDICTED: PTI1-like tyrosine-protein kinase At3g15890 [Sesamum indicum]                      |
| c51066.graph_c0 | 2.2624904      | 2.6855007      | 2.2610442      | 10.311454      | 10.753052      | 12.501033      | 4.621E-21 | 2.259396  | up        | PREDICTED: guanine nucleotide-binding protein subunit beta-like protein [Sesamum indicum]     |
| c51068.graph_c0 | 0.5453271      | 0.4923792      | 0.7787193      | 1.9873215      | 3.4783649      | 1.9220725      | 0.0002336 | 2.058849  | up        | PREDICTED: probable ADP-ribosylation factor GTPase-activating protein AGD11 [Sesamum indicum] |
| c51073.graph_c0 | 2.1695824      | 2.0118735      | 1.8182091      | 0.4459631      | 0.4724438      | 0.8597664      | 0.0002587 | -1.71871  | down      | -                                                                                             |
| c51078.graph_c0 | 14.387684      | 14.434144      | 12.001126      | 3.2422131      | 2.2898211      | 3.8465357      | 1.032E-07 | -2.077772 | down      | Dof zinc finger DOF5.2-like protein [Gossypium arboreum]                                      |
| c51087.graph_c0 | 6.0378529      | 6.0653731      | 5.9383089      | 15.712326      | 15.088163      | 20.159315      | 1.328E-11 | 1.538362  | up        | PREDICTED: protein CURVATURE THYLAKOID 1D, chloroplastic [Sesamum indicum]                    |
| c51088.graph_c0 | 33.877467      | 34.502932      | 37.417986      | 96.969227      | 73.616182      | 76.668048      | 6.245E-07 | 1.271941  | up        | PREDICTED: indole-3-acetic acid-induced protein ARG7-like [Nicotiana glauca]                  |
| c51089.graph_c0 | 1.9338634      | 1.7165024      | 1.6850009      | 7.8525152      | 9.1550679      | 12.088828      | 1.101E-14 | 2.484093  | up        | PREDICTED: chloroplast stem-loop binding protein of 41 kDa a, chloroplastic [Sesamum indicum] |
| c51094.graph_c0 | 0.1872066      | 0.236642       | 0.0916554      | 7.4986226      | 12.167211      | 10.895159      | 2.387E-34 | 5.925123  | up        | PREDICTED: peroxidase 16 [Sesamum indicum]                                                    |
| c51097.graph_c0 | 26.585956      | 27.872037      | 27.559316      | 59.16162       | 56.327771      | 65.635479      | 9.185E-15 | 1.184736  | up        | PREDICTED: 30S ribosomal protein S20, chloroplastic isoform X1 [Sesamum indicum]              |
| c51100.graph_c0 | 1.0594358      | 1.7498253      | 1.454875       | 7.7954454      | 12.040505      | 13.202362      | 6.523E-14 | 2.987698  | up        | hypothetical protein MIMGU_mgv1a004964mg [Erythranthe guttata]                                |
| c51101.graph_c0 | 1.2255809      | 1.5215539      | 1.375088       | 9.7094628      | 12.137478      | 17.62442       | 4.408E-10 | 3.294342  | up        | PREDICTED: chlorophyll a-b binding protein 151, chloroplastic-like [Pyrus x bretschneideri]   |
| c51104.graph_c0 | 33.977064      | 38.603279      | 35.753706      | 6.101361       | 6.7488133      | 3.8322031      | 7.188E-29 | -2.6546   | down      | -                                                                                             |
| c51106.graph_c0 | 2.9300084      | 2.5915326      | 2.0005179      | 8.0343704      | 5.8616529      | 7.2838201      | 2.976E-05 | 1.540394  | up        | PREDICTED: transcription factor HEC2-like [Sesamum indicum]                                   |
| c51113.graph_c0 | 1.9719058      | 2.2326228      | 1.7878434      | 3.0153131      | 4.7074758      | 4.1657221      | 0.0042382 | 1.023601  | up        | PREDICTED: metacaspase-1-like [Sesamum indicum]                                               |
| c51120.graph_c0 | 10.425116      | 11.718103      | 11.588358      | 4.6520794      | 5.7854121      | 5.4591985      | 0.0006126 | -1.046926 | down      | --                                                                                            |
| c51125.graph_c0 | 0.3971893      | 0.5881445      | 0.803776       | 9.9887795      | 8.3204461      | 7.2035449      | 2.119E-24 | 3.880388  | up        | PREDICTED: phosphate transporter PHO1 homolog 9-like [Sesamum indicum]                        |
| c51131.graph_c0 | 0.3145184      | 0.2839806      | 0.4106311      | 3.5083416      | 11.572336      | 14.757133      | 6.486E-05 | 4.908547  | up        | hypothetical protein CISIN_1g026722mg [Citrus sinensis]                                       |



| #ID             | 28 h-1<br>FPKM | 28 h-2<br>FPKM | 28 h-3<br>FPKM | 48 h-1<br>FPKM | 48 h-2<br>FPKM | 48 h-3<br>FPKM | FDR       | log2FC    | regulated | nr_annotation                                                                                     |
|-----------------|----------------|----------------|----------------|----------------|----------------|----------------|-----------|-----------|-----------|---------------------------------------------------------------------------------------------------|
| c51132.graph_c0 | 43.673348      | 48.567572      | 48.236068      | 83.840274      | 98.889188      | 109.72819      | 2.344E-14 | 1.096018  | up        | PREDICTED: 24-methylenesterol C-methyltransferase 2-like [Sesamum indicum]                        |
| c51133.graph_c0 | 13.867017      | 13.54503       | 15.224319      | 1.4381562      | 1.0157014      | 0.9952932      | 2.09E-15  | -3.578433 | down      | -                                                                                                 |
| c51134.graph_c0 | 205.22334      | 253.35421      | 239.69087      | 23.484473      | 21.689343      | 22.325153      | 1.326E-70 | -3.327295 | down      | PREDICTED: uncharacterized protein LOC105179155 [Sesamum indicum]                                 |
| c51135.graph_c0 | 0.1189208      | 0.1073743      | 0.2425959      | 3.1655572      | 13.014867      | 10.998518      | 6.383E-06 | 5.878054  | up        | PREDICTED: non-specific lipid transfer protein GPI-anchored 2-like [Eucalyptus grandis]           |
| c51137.graph_c0 | 0.1802111      | 0.4067844      | 0.4411525      | 2.7792426      | 3.1862654      | 0.8130258      | 0.0098222 | 2.768314  | up        | hypothetical protein MIMGU_mgv1a008689mg [Erythranthe guttata]                                    |
| c51138.graph_c0 | 1.8915876      | 3.0624885      | 2.3418925      | 0.4134011      | 0.4379484      | 0.2942735      | 4.538E-08 | -2.626396 | down      | hypothetical protein MIMGU_mgv1a008111mg [Erythranthe guttata]                                    |
| c51144.graph_c0 | 2.8824603      | 3.4701219      | 3.1840868      | 0.5716722      | 1.1585723      | 2.0567979      | 0.0002512 | -1.305558 | down      | PREDICTED: UPT0392 protein KCOM_0530710-like [Sesamum indicum]                                    |
| c51145.graph_c0 | 1.606592       | 0.8199054      | 1.5959585      | 19.567856      | 24.763165      | 25.368589      | 7.858E-39 | 4.151567  | up        | PREDICTED: proline-rich protein 3 [Sesamum indicum]                                               |
| c51148.graph_c0 | 2.4776305      | 2.2630804      | 2.4918951      | 13.730904      | 17.370362      | 17.676637      | 2.141E-35 | 2.791035  | up        | PREDICTED: GDSL esterase/lipase 7 [Sesamum indicum]                                               |
| c51154.graph_c0 | 13.18559       | 15.335707      | 22.430475      | 7.0820789      | 3.901354       | 5.2933366      | 0.000351  | -1.595571 | down      | PREDICTED: heat stress transcription factor A-2-like [Nicotiana glauca]                           |
| c51156.graph_c0 | 1.1824466      | 1.2344569      | 1.3266918      | 0.4683869      | 0.6946788      | 0.4584446      | 0.0092793 | -1.169584 | down      | PREDICTED: uncharacterized protein At4g26485-like [Sesamum indicum]                               |
| c51158.graph_c0 | 7.48531        | 8.3542978      | 8.1722133      | 17.65856       | 18.893244      | 25.757525      | 2.829E-08 | 1.413835  | up        | hypothetical protein MIMGU_mgv1a009002mg [Erythranthe guttata]                                    |
| c51160.graph_c0 | 0.6246562      | 0.4834337      | 0.218449       | 1.8663803      | 2.3966105      | 2.9691195      | 1.254E-08 | 2.483552  | up        | PREDICTED: expansin-B3-like [Sesamum indicum]                                                     |
| c51161.graph_c0 | 11.067827      | 10.329116      | 8.8288754      | 43.109598      | 45.669392      | 56.681304      | 8.515E-31 | 2.306171  | up        | PREDICTED: glyceraldehyde-3-phosphate dehydrogenase A, chloroplastic [Sesamum indicum]            |
| c51162.graph_c0 | 0.1915553      | 0.2306087      | 0.3647177      | 2.0234206      | 3.3439673      | 3.8889234      | 2.828E-10 | 3.587441  | up        | PREDICTED: dirigent protein 23-like [Sesamum indicum]                                             |
| c51165.graph_c0 | 2.3163572      | 1.9813769      | 1.6911677      | 0.3605802      | 0.9276925      | 0.8250226      | 0.0012133 | -1.475112 | down      | -                                                                                                 |
| c51169.graph_c0 | 3.9009827      | 4.3957325      | 3.1067739      | 1.9383549      | 1.4248442      | 1.1615572      | 0.0005336 | -1.282639 | down      | PREDICTED: probable WRKY transcription factor 71 isoform X1 [Sesamum indicum]                     |
| c51176.graph_c0 | 8.6833811      | 8.7363109      | 9.2112385      | 2.6730861      | 1.6657709      | 1.6789383      | 1.431E-06 | -2.093912 | down      | -                                                                                                 |
| c51177.graph_c0 | 26.754868      | 25.57444       | 24.991239      | 73.531413      | 132.84284      | 182.74935      | 0.0002518 | 2.361076  | up        | PREDICTED: trans-resveratrol di-O-methyltransferase [Vitis vinifera]                              |
| c51183.graph_c0 | 0.5254091      | 1.3045867      | 0.7502767      | 3.9959684      | 5.8207104      | 9.7778687      | 0.0001883 | 2.957201  | up        | PREDICTED: LOW QUALITY PROTEIN: ethylene-responsive transcription factor 2-like [Sesamum indicum] |
| c51184.graph_c0 | 44.612573      | 76.451639      | 70.578206      | 3.0775359      | 4.4828797      | 2.738373       | 5.712E-15 | -4.179339 | down      | hypothetical protein CARUB_v10018292mg, partial [Capsella rubella]                                |
| c51186.graph_c0 | 5.0856825      | 5.4582897      | 5.1677694      | 10.581953      | 9.9217564      | 10.822711      | 0.0058987 | 1.03827   | up        | PREDICTED: nucleobase-ascorbate transporter 12 [Sesamum indicum]                                  |
| c51193.graph_c0 | 5.0693225      | 6.0632018      | 4.6200158      | 12.93493       | 10.697173      | 14.850869      | 1.665E-05 | 1.331879  | up        | PREDICTED: cyclin-D3-1 [Sesamum indicum]                                                          |
| c51195.graph_c0 | 0.3993565      | 0.1802907      | 0.1629358      | 2.5310688      | 2.7707391      | 2.1019878      | 6.179E-12 | 3.360436  | up        | hypothetical protein MIMGU_mgv1a015662mg [Erythranthe guttata]                                    |
| c51201.graph_c0 | 71.657079      | 78.314636      | 72.884757      | 40.453976      | 32.916975      | 24.676301      | 1.411E-12 | -1.135588 | down      | PREDICTED: uncharacterized protein LOC105164312 [Sesamum indicum]                                 |
| c51202.graph_c0 | 3.4060681      | 2.8208476      | 2.8559948      | 13.220306      | 8.8637215      | 6.7824712      | 0.0027571 | 1.721093  | up        | PREDICTED: U-box domain-containing protein 9-like [Sesamum indicum]                               |
| c51218.graph_c0 | 2.0537567      | 1.8068023      | 2.0196126      | 0.2002529      | 0.4950019      | 0.9503138      | 0.0001314 | -1.813204 | down      | -                                                                                                 |

| #ID             | 28 h-1<br>FPKM | 28 h-2<br>FPKM | 28 h-3<br>FPKM | 48 h-1<br>FPKM | 48 h-2<br>FPKM | 48 h-3<br>FPKM | FDR       | log2FC    | regulated | nr_annotation                                                                         |
|-----------------|----------------|----------------|----------------|----------------|----------------|----------------|-----------|-----------|-----------|---------------------------------------------------------------------------------------|
| c51220.graph_c0 | 0.5205669      | 0.4700231      | 0.4247784      | 22.600099      | 42.466581      | 39.631728      | 2.436E-21 | 6.24065   | up        | -                                                                                     |
| c51235.graph_c0 | 0              | 0.0834878      | 0.1006016      | 4.2585199      | 8.8986044      | 10.081372      | 4.12E-14  | 7.008238  | up        | PREDICTED: probable pectate lyase 16 [Sesamum indicum]                                |
| c51236.graph_c0 | 29.54449       | 25.159214      | 23.745232      | 41.144699      | 54.998938      | 62.744603      | 3.532E-06 | 1.053995  | up        | hypothetical protein MIMGU_mgv1a014485mg [Erythranthe guttata]                        |
| c51237.graph_c0 | 0.0544192      | 0.1474064      | 0.0444056      | 3.8629012      | 4.8230389      | 3.1302946      | 4.941E-22 | 5.627672  | up        | -                                                                                     |
| c51246.graph_c0 | 1.1072454      | 2.0470841      | 1.3767668      | 8.2874223      | 6.6554419      | 5.1142941      | 9.219E-07 | 2.195814  | up        | PREDICTED: uncharacterized protein LOC105170022 [Sesamum indicum]                     |
| c51248.graph_c0 | 1.0147003      | 1.8323584      | 1.4075781      | 4.8875878      | 5.4503227      | 7.210095       | 1.465E-06 | 2.082278  | up        | PREDICTED: mitogen-activated protein kinase 19 isoform X2 [Sesamum indicum]           |
| c51249.graph_c0 | 15.253516      | 17.412368      | 17.899604      | 30.613679      | 35.650244      | 34.817876      | 2.18E-10  | 1.038631  | up        | PREDICTED: NADP-dependent D-sorbitol-6-phosphate dehydrogenase-like [Sesamum indicum] |
| c51257.graph_c0 | 3.8465756      | 2.9994929      | 2.1686077      | 11.52466       | 18.407386      | 24.374332      | 1.794E-06 | 2.623028  | up        | PREDICTED: leucine-rich repeat extensin-like protein 2 [Sesamum indicum]              |
| c51262.graph_c0 | 2.9688734      | 3.0366334      | 3.1985579      | 14.582654      | 13.424046      | 13.577247      | 2.32E-26  | 2.219288  | up        | hypothetical protein MIMGU_mgv1a003907mg [Erythranthe guttata]                        |
| c51264.graph_c0 | 0.1626309      | 0.0978937      | 0.1769407      | 7.4899969      | 6.0420524      | 7.2759812      | 2.775E-28 | 5.615678  | up        | PREDICTED: protein HEADING DATE 3A [Populus euphratica]                               |
| c51270.graph_c0 | 1.0460551      | 0.8995139      | 1.1787428      | 66.297591      | 87.023592      | 132.98302      | 3.408E-18 | 6.551086  | up        | PREDICTED: auxin-binding protein ABP19a [Beta vulgaris subsp. vulvaris]               |
| c51271.graph_c0 | 56.815943      | 53.978876      | 58.317427      | 9.4039251      | 10.626473      | 8.5070152      | 4.014E-60 | -2.525655 | down      | PREDICTED: alcohol dehydrogenase-like 7 [Sesamum indicum]                             |
| c51273.graph_c0 | 1.5610294      | 2.0358912      | 1.9578581      | 6.046088       | 5.6675405      | 6.4557273      | 2.363E-08 | 1.752     | up        | PREDICTED: mitogen-activated protein kinase homolog NTF6 [Sesamum indicum]            |
| c51287.graph_c0 | 1.1411568      | 0.9273219      | 0.6052635      | 28.930007      | 40.378521      | 30.568323      | 3.298E-51 | 5.261755  | up        | hypothetical protein MIMGU_mgv1a013386mg [Erythranthe guttata]                        |
| c51310.graph_c0 | 0.9800087      | 1.954057       | 1.2328386      | 0              | 0.3289989      | 0.2763329      | 0.0001351 | -2.770517 | down      | -                                                                                     |
| c51315.graph_c0 | 1.743842       | 1.8369468      | 3.438822       | 5.1577125      | 8.5862401      | 4.9171088      | 0.0048368 | 1.445715  | up        | unnamed protein product [Pneumocystis jirovecii]                                      |
| c51323.graph_c0 | 1.1452754      | 1.0340763      | 1.0226991      | 4.4921174      | 6.5579325      | 5.2887915      | 6.511E-15 | 2.387916  | up        | PREDICTED: uncharacterized protein LOC105175605 isoform X2 [Sesamum indicum]          |
| c51328.graph_c0 | 25.749343      | 24.223033      | 29.701772      | 3.7594877      | 6.426664       | 4.5615948      | 6.132E-20 | -2.39929  | down      | -                                                                                     |
| c51331.graph_c0 | 26.613609      | 30.254127      | 26.55691       | 6.6046872      | 10.333832      | 14.556409      | 1.469E-07 | -1.373533 | down      | --                                                                                    |
| c51335.graph_c0 | 41.102345      | 49.343867      | 42.095728      | 71.213377      | 93.839903      | 111.62295      | 8.321E-06 | 1.097622  | up        | PREDICTED: uncharacterized protein LOC105168965 [Sesamum indicum]                     |
| c51337.graph_c0 | 1.1856629      | 0.9607432      | 1.3892182      | 6.3199505      | 11.145094      | 16.836072      | 4.05E-05  | 3.307061  | up        | PREDICTED: cell division control protein 2 homolog D [Sesamum indicum]                |
| c51351.graph_c0 | 77.494522      | 72.57263       | 76.691781      | 30.775512      | 29.322126      | 26.393568      | 7.937E-21 | -1.346605 | down      | PREDICTED: putative E3 ubiquitin-protein ligase RFB4 [Sesamum indicum]                |
| c51353.graph_c0 | 0.7354443      | 0.4426915      | 0.5751117      | 5.049578       | 4.1972338      | 4.9423926      | 6.931E-16 | 3.060706  | up        | PREDICTED: uncharacterized protein LOC105163262 isoform X2 [Sesamum indicum]          |
| c51360.graph_c0 | 2.4189419      | 0.9100324      | 1.096576       | 8.5171861      | 6.6769652      | 5.7596911      | 4.323E-08 | 2.291666  | up        | PREDICTED: uncharacterized protein LOC105165055 [Sesamum indicum]                     |
| c51361.graph_c0 | 0.3178684      | 0.1594474      | 0.259378       | 2.6861441      | 7.8729484      | 6.8914979      | 1.099E-06 | 4.59133   | up        | hypothetical protein MIMGU_mgv1a009735mg [Erythranthe guttata]                        |
| c51365.graph_c0 | 3.1060575      | 3.8480057      | 3.0060557      | 0.4578089      | 1.4549791      | 2.0367781      | 0.0049359 | -1.310829 | down      | -                                                                                     |

| #ID             | 28 h-1<br>FPKM | 28 h-2<br>FPKM | 28 h-3<br>FPKM | 48 h-1<br>FPKM | 48 h-2<br>FPKM | 48 h-3<br>FPKM | FDR       | log2FC    | regulated | nr_annotation                                                                                           |
|-----------------|----------------|----------------|----------------|----------------|----------------|----------------|-----------|-----------|-----------|---------------------------------------------------------------------------------------------------------|
| c51372.graph_c0 | 5.1395549      | 6.1255077      | 5.7755096      | 14.89089       | 18.890673      | 26.102154      | 1.413E-06 | 1.848318  | up        | PREDICTED: 2-alkenal reductase (NADP(+)-dependent) isoform X1 [Sesamum indicum]                         |
| c51382.graph_c0 | 9.1416023      | 9.3914881      | 8.5138152      | 54.867338      | 31.708648      | 24.301014      | 0.0066057 | 2.091779  | up        | PREDICTED: abscisic acid receptor PYL4-like [Sesamum indicum]                                           |
| c51391.graph_c0 | 4.0181352      | 3.4586927      | 4.4591211      | 0.6451491      | 0.5395715      | 0.4531972      | 4.509E-13 | -2.818473 | down      | hypothetical protein MIMGU_mgv1a026169mg, partial [Erythranthe guttata]                                 |
| c51401.graph_c0 | 1.8280938      | 1.3435094      | 2.2896008      | 0.4850045      | 0.5708927      | 0.6233559      | 0.0002378 | -1.663968 | down      | PREDICTED: uncharacterized protein LOC10515/495 [Sesamum indicum]                                       |
| c51406.graph_c0 | 0.5369927      | 0.5887513      | 0.8450646      | 13.856654      | 26.577522      | 29.417916      | 8.899E-14 | 5.177002  | up        | PREDICTED: pectinesterase-like [Sesamum indicum]                                                        |
| c51410.graph_c0 | 5.7622737      | 8.5054354      | 5.9285687      | 1.1432514      | 1.345707       | 0.8477152      | 6.891E-11 | -2.554586 | down      | PREDICTED: cyclic dof factor 2-like [Sesamum indicum]                                                   |
| c51414.graph_c0 | 25.089855      | 26.332295      | 24.966011      | 9.4591626      | 13.62292       | 14.10367       | 1.14E-10  | -1.003362 | down      | PREDICTED: methyltransferase-like protein 13 [Sesamum indicum]                                          |
| c51416.graph_c0 | 0.7561427      | 1.0620182      | 1.3025688      | 3.7806182      | 4.1179264      | 6.0172444      | 2.018E-08 | 2.193491  | up        | PREDICTED: uncharacterized protein LOC105175985 [Sesamum indicum]                                       |
| c51426.graph_c0 | 6.9477847      | 7.8587318      | 6.9776438      | 2.7097935      | 3.6908969      | 3.5090959      | 4.692E-06 | -1.099423 | down      | hypothetical protein MIMGU_mgv1a026964mg, partial [Erythranthe guttata]                                 |
| c51429.graph_c0 | 2.978299       | 3.1527669      | 3.771105       | 0.1301798      | 0.1379097      | 0.1158332      | 3.981E-14 | -4.646749 | down      | -                                                                                                       |
| c51433.graph_c0 | 12.56792       | 13.673922      | 16.254682      | 66.431287      | 102.41352      | 110.32952      | 9.164E-14 | 2.749166  | up        | PREDICTED: leucine-rich repeat extensin-like protein 1 [Sesamum indicum]                                |
| c51437.graph_c0 | 0.0543309      | 0.0981115      | 0.1773344      | 7.8854396      | 6.8580324      | 3.6767249      | 2.241E-11 | 5.852267  | up        | hypothetical protein MIMGU_mgv1a027064mg [Erythranthe guttata]                                          |
| c51441.graph_c0 | 5.4189909      | 9.5759882      | 6.2221779      | 14.473901      | 16.061027      | 18.510532      | 2.547E-08 | 1.248558  | up        | PREDICTED: phospholipid hydroperoxide glutathione peroxidase 1, chloroplastic-like [Sesamum indicum]    |
| c51448.graph_c0 | 1.2596456      | 1.2711468      | 1.6627156      | 5.3536198      | 16.815533      | 24.194169      | 0.002447  | 3.489506  | up        | PREDICTED: uncharacterized protein LOC105162545 [Sesamum indicum]                                       |
| c51455.graph_c0 | 1.6488784      | 1.8544485      | 1.6995427      | 45.17495       | 26.880932      | 28.385444      | 1.64E-10  | 4.323557  | up        | PREDICTED: uncharacterized protein LOC105171871 [Sesamum indicum]                                       |
| c51460.graph_c0 | 20.140229      | 26.607144      | 24.73789       | 91.636477      | 129.43698      | 146.65607      | 5.306E-14 | 2.397843  | up        | PREDICTED: MLP-like protein 423 [Sesamum indicum]                                                       |
| c51462.graph_c0 | 11.709765      | 12.224823      | 12.093139      | 2.5511389      | 4.17678        | 6.1908765      | 0.0010544 | -1.449029 | down      | -                                                                                                       |
| c51463.graph_c0 | 12.155406      | 16.204548      | 12.602599      | 1.6314218      | 1.6322773      | 1.8548597      | 6.705E-16 | -2.959074 | down      | PREDICTED: uncharacterized protein LOC105175709 [Sesamum indicum]                                       |
| c51468.graph_c0 | 4.6072578      | 5.4598974      | 5.1105496      | 1.368759       | 1.83671        | 0.5683597      | 3.862E-06 | -1.964256 | down      | PREDICTED: oleosin 1-like [Solanum lycopersicum]                                                        |
| c51470.graph_c0 | 6.3231443      | 8.1130828      | 8.0381668      | 13.920878      | 16.26692       | 17.491541      | 9.47E-05  | 1.123624  | up        | PREDICTED: probable stress-associated endoplasmic reticulum protein [Musa acuminata subsp. malaccensis] |
| c51473.graph_c0 | 1.7943588      | 1.8469571      | 1.5227494      | 4.6399432      | 5.0600295      | 5.9905084      | 2.39E-06  | 1.642645  | up        | PREDICTED: DNA replication complex GINS protein PSF2 [Sesamum indicum]                                  |
| c51474.graph_c0 | 0.1761193      | 0.7950961      | 0.5748476      | 5.5811045      | 7.5680044      | 6.5551638      | 3.668E-13 | 3.709911  | up        | PREDICTED: subtilisin-like protease [Sesamum indicum]                                                   |
| c51476.graph_c0 | 83.214611      | 77.913685      | 72.904942      | 23.281904      | 19.449418      | 14.324962      | 2.652E-43 | -1.987698 | down      | PREDICTED: uncharacterized protein LOC104224082 [Nicotiana glauca]                                      |
| c51478.graph_c0 | 1.2423626      | 1.1217369      | 1.2840931      | 3.6745008      | 2.6692718      | 4.0168742      | 0.0003723 | 1.550165  | up        | PREDICTED: GDSL esterase/lipase 5 isoform X1 [Sesamum indicum]                                          |
| c51483.graph_c0 | 4.9091437      | 5.0216258      | 5.1467196      | 9.9248147      | 10.514138      | 9.1113909      | 7.962E-05 | 1.012923  | up        | PREDICTED: UPF0553 protein-like isoform X1 [Sesamum indicum]                                            |
| c51485.graph_c0 | 1.2431441      | 0.827063       | 1.1211739      | 3.7321029      | 10.279647      | 7.3795615      | 0.0003229 | 2.771775  | up        | PREDICTED: glutathione transferase GST 23-like [Sesamum indicum]                                        |
| c51489.graph_c0 | 3.4089425      | 3.8069449      | 2.7084674      | 62.428316      | 60.533614      | 64.604035      | 7.29E-124 | 4.283017  | up        | PREDICTED: chlorophyll a-b binding protein 6, chloroplastic-like [Malus domestica]                      |

| #ID             | 28 h-1<br>FPKM | 28 h-2<br>FPKM | 28 h-3<br>FPKM | 48 h-1<br>FPKM | 48 h-2<br>FPKM | 48 h-3<br>FPKM | FDR       | log2FC    | regulated | nr_annotation                                                                                      |
|-----------------|----------------|----------------|----------------|----------------|----------------|----------------|-----------|-----------|-----------|----------------------------------------------------------------------------------------------------|
| c51493.graph_c0 | 26.750153      | 31.125887      | 30.41294       | 12.059255      | 13.37651       | 16.158499      | 0.0002182 | -1.047299 | down      | Endosomal P24A protein precursor, putative [Ricinus communis]                                      |
| c51506.graph_c0 | 0.6630656      | 0.5559228      | 0.6569967      | 5.042907       | 6.9323331      | 6.9978146      | 9.966E-17 | 3.374109  | up        | PREDICTED: uncharacterized protein LOC103322890 [Prunus mume]                                      |
| c51513.graph_c0 | 0.6844498      | 0.617994       | 0.8144871      | 26.244614      | 36.725983      | 40.78611       | 6.33E-45  | 5.649739  | up        | PREDICTED: ectonucleotide pyrophosphatase/phosphodiesterase family member 1-like [Sesamum indicum] |
| c51514.graph_c0 | 7.1312613      | 7.0030903      | 7.1088406      | 11.415736      | 14.611028      | 19.859248      | 0.0004132 | 1.146062  | up        | PREDICTED: cyclin-D3-3-like [Sesamum indicum]                                                      |
| c51517.graph_c0 | 0.3465478      | 0.1564501      | 0.2356501      | 8.7122847      | 4.3433455      | 8.2732907      | 2.023E-10 | 4.900817  | up        | PREDICTED: uncharacterized protein LOC105157094 [Sesamum indicum]                                  |
| c51520.graph_c0 | 0              | 0.1940491      | 0.1315274      | 2.247482       | 2.4530842      | 3.6359926      | 9.075E-16 | 4.716146  | up        | PREDICTED: miraculin-like [Nicotiana glauca]                                                       |
| c51523.graph_c0 | 5.0848728      | 4.9659522      | 5.3347046      | 0.9207787      | 1.3238296      | 0.9948683      | 9.205E-08 | -2.210474 | down      | -                                                                                                  |
| c51528.graph_c0 | 21.443565      | 19.978015      | 21.206257      | 71.780262      | 50.628135      | 42.643938      | 0.0010721 | 1.448923  | up        | PREDICTED: phytochrome A-associated F-box protein [Sesamum indicum]                                |
| c51530.graph_c0 | 1.7590478      | 0.6176548      | 1.355626       | 6.0698007      | 7.2175914      | 12.565294      | 2.697E-05 | 2.825385  | up        | PREDICTED: ethylene-responsive transcription factor 2 [Nicotiana tomentosiformis]                  |
| c51532.graph_c0 | 0.3234964      | 0.1947246      | 0.2419729      | 2.6311892      | 2.2444209      | 3.1317569      | 3.034E-15 | 3.438765  | up        | PREDICTED: E2F transcription factor-like E2FE [Sesamum indicum]                                    |
| c51537.graph_c0 | 124.48646      | 127.74764      | 132.03571      | 12.470416      | 11.876185      | 7.9617387      | 2.47E-114 | -3.525836 | down      | PREDICTED: anthocyanidin 3-O-glucosyltransferase 5-like [Sesamum indicum]                          |
| c51541.graph_c0 | 0              | 0.1852383      | 0.0558024      | 3.1206328      | 4.7752351      | 5.4763094      | 7.767E-20 | 5.829724  | up        | RecName: Full=Casparian strip membrane protein 3; Short=MgCASP3 [Erythranthe guttata]              |
| c51543.graph_c0 | 4.8121919      | 5.9399427      | 6.4119683      | 0.3860638      | 0.3271902      | 0.6870345      | 4.12E-14  | -3.577796 | down      | -                                                                                                  |
| c51545.graph_c0 | 16.056734      | 18.829363      | 18.854334      | 3.3011725      | 5.0222832      | 4.0637208      | 9.403E-32 | -2.081287 | down      | PREDICTED: galactose oxidase [Sesamum indicum]                                                     |
| c51549.graph_c0 | 0.6545695      | 0.3283416      | 0.8308585      | 7.1908633      | 7.3248536      | 6.5624482      | 1.598E-15 | 3.580024  | up        | PREDICTED: cyclin-U4-1 [Sesamum indicum]                                                           |
| c51554.graph_c0 | 2.6754345      | 3.7123111      | 3.8846921      | 9.8746977      | 13.86881       | 14.28907       | 6.986E-15 | 1.923946  | up        | PREDICTED: 3-ketoacyl-CoA synthase 1 [Sesamum indicum]                                             |
| c51556.graph_c0 | 0.4096821      | 0.5044153      | 0.7901571      | 39.042086      | 68.267092      | 61.917648      | 1.619E-33 | 6.66563   | up        | hypothetical protein MIMGU_mgv1a009759mg [Erythranthe guttata]                                     |
| c51560.graph_c0 | 0.1020428      | 0.2456935      | 0.2497982      | 3.147437       | 3.5170307      | 3.8747619      | 3.411E-19 | 4.179658  | up        | PREDICTED: homeobox-leucine zipper protein HOX21-like [Sesamum indicum]                            |
| c51570.graph_c0 | 1.4960387      | 1.1461186      | 1.4797035      | 0.4022538      | 0.4261391      | 0.3067911      | 7.003E-05 | -1.817138 | down      | PREDICTED: uncharacterized protein LOC105175075 [Sesamum indicum]                                  |
| c51590.graph_c0 | 1.7017942      | 1.6463149      | 2.2813538      | 129.12081      | 132.21736      | 127.91554      | 7.26E-153 | 6.152947  | up        | PREDICTED: raucatricine-O-beta-D-glucosidase-like [Sesamum indicum]                                |
| c51599.graph_c0 | 0.1085813      | 0              | 0.1181353      | 6.3312032      | 10.643943      | 10.205555      | 3.832E-31 | 6.936159  | up        | PREDICTED: uncharacterized protein LOC105165189 [Sesamum indicum]                                  |
| c51601.graph_c0 | 4.1493945      | 3.7465142      | 3.6728103      | 0.8246082      | 1.5110442      | 2.1218719      | 2.154E-05 | -1.346465 | down      | PREDICTED: uncharacterized protein LOC105171071 [Sesamum indicum]                                  |
| c51606.graph_c0 | 2.3446039      | 1.5877181      | 2.3383282      | 4.6230459      | 5.8595766      | 5.3623173      | 0.0007194 | 1.375084  | up        | PREDICTED: probable phospholipase A2 homolog 1 [Sesamum indicum]                                   |
| c51612.graph_c0 | 0.4189245      | 0.4728119      | 0.7691376      | 2.655088       | 2.8127438      | 3.1893498      | 1.033E-07 | 2.420953  | up        | PREDICTED: uncharacterized protein LOC105169203 [Sesamum indicum]                                  |
| c51614.graph_c0 | 0.5543903      | 0.6674166      | 1.8095119      | 11.126567      | 20.348513      | 18.550134      | 2.098E-14 | 4.074784  | up        | -                                                                                                  |
| c51619.graph_c0 | 2.6028682      | 2.9067595      | 3.4653419      | 10.418928      | 12.41729       | 12.206421      | 5.61E-09  | 2.003711  | up        | hypothetical protein MIMGU_mgv1a023502mg, partial [Erythranthe guttata]                            |
| c51624.graph_c0 | 0.3197263      | 0.3849105      | 0.0869647      | 3.2422131      | 4.1503008      | 5.7698035      | 1.692E-12 | 4.092256  | up        | hypothetical protein MIMGU_mgv1a024616mg [Erythranthe guttata]                                     |

| #ID             | 28 h-1<br>FPKM | 28 h-2<br>FPKM | 28 h-3<br>FPKM | 48 h-1<br>FPKM | 48 h-2<br>FPKM | 48 h-3<br>FPKM | FDR       | log2FC    | regulated | nr_annotation                                                                            |
|-----------------|----------------|----------------|----------------|----------------|----------------|----------------|-----------|-----------|-----------|------------------------------------------------------------------------------------------|
| c51629.graph_c0 | 25.690256      | 27.744106      | 35.020606      | 9.4500296      | 11.769878      | 11.476575      | 2.989E-07 | -1.39808  | down      | -                                                                                        |
| c51630.graph_c0 | 1.1433435      | 1.327284       | 1.4993983      | 9.4720284      | 12.666457      | 17.316863      | 1.785E-11 | 3.347024  | up        | hypothetical protein MIMGU_mgv1a010366mg [Erythranthe guttata]                           |
| c51636.graph_c0 | 16.563972      | 18.9019        | 16.992482      | 4.4692267      | 7.0525868      | 8.4090445      | 1.028E-09 | -1.363336 | down      | unnamed protein product [Coffea canephora]                                               |
| c51638.graph_c0 | 2.6493893      | 1.8505313      | 2.4882016      | 0.3801845      | 0.4698859      | 0.3946668      | 2.005E-07 | -2.45006  | down      | -                                                                                        |
| c51639.graph_c0 | 1.3109112      | 1.0356762      | 0.9359813      | 6.4389966      | 5.7211207      | 6.2838367      | 2.529E-08 | 2.534098  | up        | hypothetical protein ARALYDRAFT_486411 [Arabidopsis lyrata subsp. lyrata]                |
| c51648.graph_c0 | 2.2247683      | 2.791832       | 2.1846251      | 6.8828525      | 10.633507      | 12.121052      | 3.299E-08 | 2.074822  | up        | hypothetical protein MIMGU_mgv1a011849mg [Erythranthe guttata]                           |
| c51653.graph_c0 | 2.691293       | 4.0220445      | 2.4232531      | 0.8234443      | 1.2461991      | 0.628025       | 0.0001609 | -1.720308 | down      | -                                                                                        |
| c51659.graph_c0 | 0.0543494      | 0.0490724      | 0.0443487      | 1.9978646      | 2.4084256      | 3.1875783      | 4.677E-20 | 5.719849  | up        | hypothetical protein MIMGU_mgv1a012062mg [Erythranthe guttata]                           |
| c51660.graph_c0 | 11.241836      | 10.614339      | 10.326455      | 26.871156      | 22.859648      | 25.286417      | 6.188E-08 | 1.265466  | up        | PREDICTED: nudix hydrolase 1 [Sesamum indicum]                                           |
| c51665.graph_c0 | 19.868045      | 19.463209      | 19.54996       | 6.7487098      | 7.4981929      | 7.3963549      | 2.305E-07 | -1.403686 | down      | PREDICTED: uncharacterized protein LOC104227211 [Nicotiana glauca]                       |
| c51676.graph_c0 | 12.072427      | 14.858789      | 15.294977      | 5.0337798      | 4.0528363      | 3.0099061      | 3.22E-14  | -1.754456 | down      | hypothetical protein MIMGU_mgv1a009467mg [Erythranthe guttata]                           |
| c51682.graph_c0 | 0.2068453      | 0.2334524      | 0.5274503      | 4.5228069      | 6.0412869      | 7.5238154      | 4.218E-21 | 4.257692  | up        | PREDICTED: serine carboxypeptidase-like 34 [Sesamum indicum]                             |
| c51683.graph_c0 | 2.5202353      | 2.6601338      | 2.1723501      | 10.258664      | 9.3901694      | 12.451045      | 6.548E-15 | 2.167829  | up        | hypothetical protein MIMGU_mgv1a008015mg [Erythranthe guttata]                           |
| c51688.graph_c0 | 5.9847352      | 6.5412663      | 6.2714357      | 22.838132      | 19.96447       | 21.813351      | 2.215E-12 | 1.825454  | up        | PREDICTED: uncharacterized protein LOC105159746 [Sesamum indicum]                        |
| c51690.graph_c0 | 1.0624356      | 1.5987996      | 2.6730613      | 19.190695      | 14.147927      | 17.175623      | 2.895E-19 | 3.288743  | up        | histone H4 [Zea mays]                                                                    |
| c51696.graph_c0 | 0.3186831      | 0.2517733      | 0.1300214      | 1.8682885      | 4.0119427      | 4.2233739      | 5.639E-08 | 3.880281  | up        | PREDICTED: carboxylesterase 1-like [Sesamum indicum]                                     |
| c51710.graph_c0 | 11.181964      | 8.9979265      | 10.040648      | 4.6851174      | 4.2722194      | 5.224179       | 0.0006542 | -1.04954  | down      | PREDICTED: pentatricopeptide repeat-containing protein At2g13600-like [Sesamum indicum]  |
| c51715.graph_c0 | 4.9922605      | 3.977244       | 5.2717744      | 0.3722387      | 1.7745379      | 1.9872945      | 0.000164  | -1.764353 | down      | BnaCnng51820D [Brassica napus]                                                           |
| c51716.graph_c0 | 11.755996      | 18.096534      | 14.810342      | 2.0353392      | 1.8481673      | 1.6169934      | 2.46E-16  | -2.975869 | down      | PREDICTED: SNF1-related protein kinase regulatory subunit gamma-1-like [Sesamum indicum] |
| c51740.graph_c0 | 1.6775321      | 2.3837181      | 1.7727762      | 5.1591235      | 4.4683875      | 5.9553172      | 4.129E-06 | 1.460187  | up        | hypothetical protein MIMGU_mgv1a007527mg [Erythranthe guttata]                           |
| c51746.graph_c0 | 10.981641      | 12.076651      | 11.734195      | 67.16824       | 53.342917      | 52.387899      | 9.697E-17 | 2.36014   | up        | PREDICTED: scarecrow-like protein 8 [Sesamum indicum]                                    |
| c51753.graph_c0 | 9.7471124      | 8.0463805      | 11.362234      | 25.239874      | 22.998923      | 23.165017      | 1.212E-07 | 1.335597  | up        | Putative non-specific lipid-transfer protein AKCS9 [Aegilops tauschii]                   |
| c51754.graph_c0 | 39.315847      | 43.469257      | 40.893896      | 16.458097      | 15.724411      | 17.655296      | 1.084E-16 | -1.269182 | down      | PREDICTED: uncharacterized protein LOC105174255 [Sesamum indicum]                        |
| c51762.graph_c0 | 3.1594008      | 2.2475367      | 2.4218001      | 14.441455      | 11.57065       | 8.6386016      | 1.527E-06 | 2.195192  | up        | PREDICTED: cyclic dof factor 1 [Sesamum indicum]                                         |
| c51764.graph_c0 | 75.676176      | 76.472816      | 75.632971      | 24.716904      | 40.434665      | 44.023308      | 2.706E-11 | -1.028272 | down      | PREDICTED: ribosomal RNA-processing protein 14-C-like [Sesamum indicum]                  |
| c51766.graph_c0 | 15.882699      | 19.323335      | 20.648379      | 36.767389      | 42.294376      | 40.078264      | 6.255E-09 | 1.132641  | up        | PREDICTED: microsomal glutathione S-transferase 3 [Sesamum indicum]                      |
| c51780.graph_c0 | 2.6593682      | 4.6689225      | 3.4358693      | 11.142846      | 13.590048      | 19.746357      | 1.858E-06 | 2.082696  | up        | hypothetical protein M569_05207, partial [Genlisea aurea]                                |

| #ID             | 28 h-1<br>FPKM | 28 h-2<br>FPKM | 28 h-3<br>FPKM | 48 h-1<br>FPKM | 48 h-2<br>FPKM | 48 h-3<br>FPKM | FDR       | log2FC    | regulated | nr_annotation                                                                          |
|-----------------|----------------|----------------|----------------|----------------|----------------|----------------|-----------|-----------|-----------|----------------------------------------------------------------------------------------|
| c51782.graph_c0 | 7.7238432      | 8.7173828      | 10.462304      | 25.161688      | 32.567735      | 30.403358      | 1.798E-12 | 1.749323  | up        | PREDICTED: uncharacterized protein LOC105172990 [Sesamum indicum]                      |
| c51784.graph_c0 | 2.2007135      | 2.7095972      | 3.5099029      | 9.8902812      | 7.5223462      | 6.5438223      | 0.0002127 | 1.557016  | up        | -                                                                                      |
| c51786.graph_c0 | 0.2352312      | 0.2973485      | 0.537451       | 3.5184405      | 4.2959416      | 5.9429995      | 2.593E-14 | 3.718974  | up        | PREDICTED: uncharacterized protein LOC100256155 [Vitis vinifera]                       |
| c51795.graph_c0 | 8.8329689      | 8.5450101      | 8.3584287      | 1.9287983      | 2.442026       | 1.8836705      | 1.898E-10 | -2.001216 | down      | PREDICTED: E3 ubiquitin-protein ligase AIL4-like [Sesamum indicum]                     |
| c51805.graph_c0 | 9.9099769      | 7.2860494      | 8.2597415      | 0.6280813      | 1.4258056      | 2.554802       | 3.454E-09 | -2.44029  | down      | -                                                                                      |
| c51807.graph_c0 | 0.6071147      | 0.4604608      | 0.5152167      | 1.7546027      | 2.3479438      | 2.3007673      | 4.427E-07 | 2.053031  | up        | PREDICTED: uncharacterized protein LOC105172555 [Sesamum indicum]                      |
| c51809.graph_c0 | 0.8501328      | 0.7310383      | 0.7267348      | 2.0525827      | 2.0657393      | 3.1048387      | 5.758E-05 | 1.684376  | up        | PREDICTED: LOW QUALITY PROTEIN: myb-like protein AA [Sesamum indicum]                  |
| c51820.graph_c0 | 16.861309      | 16.757552      | 16.183783      | 4.0746993      | 5.2940045      | 4.5149516      | 5.313E-10 | -1.804391 | down      | PREDICTED: uncharacterized protein LOC105171189 [Sesamum indicum]                      |
| c51825.graph_c0 | 12.698039      | 12.09051       | 10.110308      | 32.776697      | 27.695675      | 18.054219      | 0.0050911 | 1.219445  | up        | hypothetical protein MIMGU_mgv1a016748mg [Erythranthe guttata]                         |
| c51827.graph_c0 | 0.3158644      | 0.4277939      | 0.3221785      | 7.6072468      | 7.4227222      | 6.0563685      | 6.291E-19 | 4.351062  | up        | PREDICTED: photosystem I reaction center subunit psaK, chloroplastic [Malus domestica] |
| c51832.graph_c0 | 0.2571473      | 0.5804498      | 0.9092638      | 1.9013935      | 2.5898089      | 3.1903429      | 7.568E-07 | 2.170372  | up        | PREDICTED: RAN GTPase-activating protein 2-like isoform X1 [Sesamum indicum]           |
| c51835.graph_c0 | 9.6240902      | 10.734275      | 12.749867      | 48.03153       | 54.735327      | 50.442956      | 2.424E-45 | 2.250192  | up        | hypothetical protein CICLE_v10001854mg [Citrus clementina]                             |
| c51842.graph_c0 | 5.4943979      | 5.3090613      | 4.7980072      | 2.5658883      | 1.812165       | 2.1743924      | 0.0065701 | -1.203882 | down      | -                                                                                      |
| c51846.graph_c0 | 2.2229654      | 3.7826668      | 2.58135        | 0.4335034      | 0.8036776      | 0.6750253      | 1.198E-05 | -2.133884 | down      | PREDICTED: uncharacterized protein LOC105176481 [Sesamum indicum]                      |
| c51856.graph_c0 | 5.712081       | 6.7203444      | 8.968916       | 0.3291129      | 1.0459656      | 0.7809138      | 2.284E-12 | -3.286322 | down      | -                                                                                      |
| c51859.graph_c0 | 47.258046      | 46.117632      | 47.598973      | 19.362603      | 24.550695      | 22.612705      | 1.195E-10 | -1.045229 | down      | -                                                                                      |
| c51860.graph_c0 | 5.5400394      | 3.050083       | 4.6308861      | 17.127824      | 22.681066      | 17.678673      | 3.875E-09 | 2.158535  | up        | -                                                                                      |
| c51862.graph_c0 | 0.2405746      | 0.0434433      | 0.0785227      | 3.9642976      | 3.8120286      | 4.5584967      | 2.853E-22 | 5.12946   | up        | PREDICTED: 65-kDa microtubule-associated protein 5 [Sesamum indicum]                   |
| c51863.graph_c0 | 55.104394      | 58.248002      | 53.52573       | 105.33922      | 125.85386      | 143.86832      | 3.814E-14 | 1.206118  | up        | -                                                                                      |
| c51875.graph_c0 | 3.4709742      | 2.8056442      | 3.2368989      | 1.0894533      | 0.7546324      | 0.7456839      | 6.803E-06 | -1.827486 | down      | hypothetical protein MIMGU_mgv1a017259mg [Erythranthe guttata]                         |
| c51877.graph_c0 | 3.2176153      | 3.043548       | 2.3338202      | 0.6473912      | 0.7544157      | 0.4032313      | 1.104E-06 | -2.207364 | down      | PREDICTED: myb-related protein 305 [Sesamum indicum]                                   |
| c51906.graph_c0 | 0.1235731      | 0.1859582      | 0.0672231      | 4.1770128      | 9.2925811      | 9.8956629      | 8.47E-12  | 5.984591  | up        | PREDICTED: uncharacterized protein At1g28695-like [Sesamum indicum]                    |
| c51907.graph_c0 | 3.6418916      | 4.93243        | 3.3432231      | 0.8655686      | 1.3754475      | 1.0910851      | 3.134E-05 | -1.80267  | down      | PREDICTED: dot zinc finger protein DUF5.6 isoform X2 [Sesamum indicum]                 |
| c51920.graph_c0 | 5.1441702      | 4.4948743      | 3.655975       | 16.07016       | 18.628778      | 17.742902      | 7.592E-21 | 2.019862  | up        | PREDICTED: protein TIFY 6B [Sesamum indicum]                                           |
| c51928.graph_c0 | 6.1528352      | 10.317233      | 5.4988217      | 25.62585       | 19.278646      | 27.428165      | 1.327E-05 | 1.764672  | up        | Tubulin beta-8 chain -like protein [Gossypium arboreum]                                |
| c51933.graph_c0 | 4.227814       | 3.6608721      | 3.110531       | 6.0618938      | 6.7941222      | 8.7161274      | 0.0005572 | 1.009861  | up        | hypothetical protein MIMGU_mgv1a008682mg [Erythranthe guttata]                         |
| c51936.graph_c0 | 0.4607703      | 0.3235808      | 0.3759848      | 1.752181       | 2.5437134      | 2.2520046      | 2.295E-08 | 2.532416  | up        | hypothetical protein MIMGU_mgv1a013390mg [Erythranthe guttata]                         |
| c51940.graph_c0 | 5.186387       | 4.3561127      | 4.1336297      | 36.234144      | 57.011646      | 52.034402      | 1.775E-23 | 3.443742  | up        | PREDICTED: kirola-like isoform X2 [Sesamum indicum]                                    |

| #ID             | 28 h-1<br>FPKM | 28 h-2<br>FPKM | 28 h-3<br>FPKM | 48 h-1<br>FPKM | 48 h-2<br>FPKM | 48 h-3<br>FPKM | FDR       | log2FC    | regulated | nr_annotation                                                                                    |
|-----------------|----------------|----------------|----------------|----------------|----------------|----------------|-----------|-----------|-----------|--------------------------------------------------------------------------------------------------|
| c51945.graph_c0 | 6.4266915      | 7.5842305      | 8.9702185      | 116.83516      | 65.179378      | 41.710857      | 0.0017089 | 3.341335  | up        | PREDICTED: chaperone protein dnaJ 11, chloroplastic-like [Sesamum indicum]                       |
| c51947.graph_c0 | 4.6005533      | 3.6791405      | 4.8265894      | 33.023179      | 44.021307      | 40.82899       | 2.829E-61 | 3.205785  | up        | PREDICTED: aldehyde dehydrogenase family 2 member C4-like [Sesamum indicum]                      |
| c51952.graph_c0 | 271.85374      | 301.27874      | 351.76553      | 45.536477      | 49.810992      | 64.075108      | 7.871E-31 | -2.498505 | down      | -                                                                                                |
| c51961.graph_c0 | 53.379754      | 69.21547       | 65.059948      | 8.05352        | 8.7415245      | 7.0484987      | 1.439E-40 | -2.93406  | down      | PREDICTED: protein ABSCISIC ACID-INSENSITIVE 5 [Sesamum indicum]                                 |
| c51962.graph_c0 | 1.0051831      | 1.2279105      | 1.0614627      | 14.390327      | 26.916612      | 25.942302      | 5.999E-15 | 4.383031  | up        | -                                                                                                |
| c51963.graph_c0 | 6.8298934      | 6.8349774      | 7.2122953      | 34.09351       | 38.077168      | 55.210931      | 2.771E-11 | 2.645858  | up        | PREDICTED: D-3-phosphoglycerate dehydrogenase 2, chloroplastic-like [Sesamum indicum]            |
| c51965.graph_c0 | 10.934732      | 9.2894095      | 8.3512503      | 26.42386       | 56.419749      | 90.280419      | 0.0041296 | 2.62587   | up        | PREDICTED: subtilisin-like protease [Sesamum indicum]                                            |
| c51971.graph_c0 | 15.672133      | 14.592669      | 15.905489      | 25.328619      | 30.252441      | 39.882099      | 3.428E-05 | 1.084299  | up        | PREDICTED: UDP-glucose 6-dehydrogenase 3 [Nicotiana glauca]                                      |
| c51975.graph_c0 | 1.2320412      | 1.5674976      | 1.6450945      | 8.0924606      | 20.154025      | 28.739328      | 0.000293  | 3.70594   | up        | PREDICTED: vacuolar iron transporter homolog 2-like [Sesamum indicum]                            |
| c51977.graph_c0 | 5.1759146      | 7.1116432      | 6.2434407      | 25.387648      | 21.757862      | 16.371243      | 8.905E-07 | 1.825117  | up        | unnamed protein product [Coffea canephora]                                                       |
| c51985.graph_c0 | 8.3947753      | 7.1300521      | 8.475508       | 1.7133807      | 1.8151191      | 1.6850354      | 6.938E-08 | -2.16136  | down      | PREDICTED: zinc finger protein 3 [Solanum lycopersicum]                                          |
| c51987.graph_c0 | 3.8181629      | 4.5476909      | 4.64024        | 15.137255      | 17.563333      | 16.309448      | 1.61E-09  | 1.953699  | up        | PREDICTED: RPM1-interacting protein 4 [Sesamum indicum]                                          |
| c51988.graph_c0 | 16.101922      | 17.642256      | 15.451901      | 33.940844      | 30.530385      | 35.777903      | 3.679E-08 | 1.069996  | up        | PREDICTED: thioredoxin F1, chloroplastic-like [Sesamum indicum]                                  |
| c51992.graph_c0 | 1.3060614      | 1.7688765      | 1.4653863      | 2.6212544      | 3.9461227      | 4.2964828      | 0.00186   | 1.293029  | up        | PREDICTED: cucumber peeling cupredoxin-like [Sesamum indicum]                                    |
| c52006.graph_c0 | 0              | 0.0590759      | 0              | 3.6491673      | 3.6022695      | 3.6897808      | 1.549E-23 | 7.579981  | up        | PREDICTED: probable leucine-rich repeat receptor-like protein kinase At5g49770 [Sesamum indicum] |
| c52017.graph_c0 | 8.0674152      | 8.2499696      | 8.1104791      | 2.0904066      | 2.7532023      | 2.2622001      | 2.099E-07 | -1.743033 | down      | hypothetical protein MIMGU_mgv1a014249mg [Erythranthe guttata]                                   |
| c52024.graph_c0 | 3.4607753      | 1.3887803      | 2.0918255      | 18.684466      | 19.966047      | 25.010272      | 5.067E-18 | 3.23559   | up        | Chlorophyll a-b binding protein 151 [Morus notabilis]                                            |
| c52037.graph_c0 | 0.2954854      | 0.6669889      | 0.4822273      | 2.4345714      | 7.0430177      | 6.582119       | 6.74E-05  | 3.500945  | up        | hypothetical protein MIMGU_mgv1a017917mg [Erythranthe guttata]                                   |
| c52039.graph_c0 | 7.4325088      | 9.5364833      | 5.5541409      | 0.8925397      | 2.2062544      | 1.5001111      | 6.039E-07 | -2.262042 | down      | hypothetical protein MIMGU_mgv1a019582mg [Erythranthe guttata]                                   |
| c52046.graph_c0 | 3.9641887      | 3.7849971      | 3.6251459      | 83.57508       | 95.818923      | 121.23435      | 5.649E-47 | 4.761735  | up        | PREDICTED: serine carboxypeptidase 1 [Sesamum indicum]                                           |
| c52057.graph_c0 | 0.1416476      | 0.2131575      | 0.0963194      | 3.6807503      | 5.1039731      | 4.3401858      | 5.532E-31 | 4.90113   | up        | hypothetical protein MIMGU_mgv1a003539mg [Erythranthe guttata]                                   |
| c52059.graph_c0 | 0.7261046      | 1.0086221      | 0.5924954      | 4.6727547      | 4.1251808      | 3.9058018      | 6.625E-09 | 2.494594  | up        | PREDICTED: shikimate O-hydroxycinnamoyltransferase-like [Sesamum indicum]                        |
| c52060.graph_c0 | 4.0307227      | 2.5020632      | 5.6872928      | 272.06692      | 258.56527      | 300.99428      | 1.03E-245 | 6.129092  | up        | --                                                                                               |
| c52063.graph_c0 | 28.403122      | 29.775507      | 31.900536      | 15.574353      | 15.570615      | 12.358186      | 1.858E-07 | -1.006142 | down      | PREDICTED: uncharacterized protein LOC105166059 [Sesamum indicum]                                |
| c52068.graph_c0 | 14.96007       | 17.646021      | 19.68751       | 64.716249      | 61.805699      | 76.539503      | 4.121E-33 | 1.9981    | up        | PREDICTED: outer envelope pore protein 16, chloroplastic [Nicotiana tomentosiformis]             |
| c52071.graph_c0 | 7.1097987      | 7.5963866      | 6.0916145      | 0.3004064      | 1.4320989      | 1.3364993      | 9.006E-09 | -2.739294 | down      | hypothetical protein MIMGU_mgv1a026849mg [Erythranthe guttata]                                   |

| #ID             | 28 h-1<br>FPKM | 28 h-2<br>FPKM | 28 h-3<br>FPKM | 48 h-1<br>FPKM | 48 h-2<br>FPKM | 48 h-3<br>FPKM | FDR       | log2FC    | regulated | nr_annotation                                                                           |
|-----------------|----------------|----------------|----------------|----------------|----------------|----------------|-----------|-----------|-----------|-----------------------------------------------------------------------------------------|
| c52075.graph_c0 | 4.4925381      | 5.5166233      | 4.7656367      | 1.0250321      | 2.0511392      | 2.6348614      | 0.0029426 | -1.3423   | down      | -                                                                                       |
| c52084.graph_c0 | 14.465154      | 17.991084      | 15.580551      | 4.0338426      | 3.1079034      | 2.2433056      | 5.601E-21 | -2.305115 | down      | PREDICTED: transcription factor TGA5-like [Sesamum indicum]                             |
| c52087.graph_c0 | 0.1824791      | 0.7139665      | 0.1985353      | 2.85277        | 4.3290456      | 3.4988448      | 2.055E-12 | 3.324224  | up        | hypothetical protein MIMGU_mgv1a014873mg [Erythranthe guttata]                          |
| c52090.graph_c0 | 0.8086569      | 0.2433804      | 0.7331749      | 21.411782      | 14.116664      | 15.809169      | 2.164E-18 | 4.894243  | up        | hypothetical protein glysoja_014339 [Glycine soja]                                      |
| c52096.graph_c0 | 9.4586978      | 9.8022111      | 10.487819      | 1.7082802      | 3.1502459      | 3.7437466      | 2.275E-12 | -1.759795 | down      | PREDICTED: pentatricopeptide repeat-containing protein At1g77405 [Sesamum indicum]      |
| c52105.graph_c0 | 12.364434      | 13.835047      | 13.060352      | 4.9999213      | 5.1949486      | 7.357796       | 0.0008882 | -1.122991 | down      | PREDICTED: ABC transporter C family member S-like [Sesamum indicum]                     |
| c52110.graph_c0 | 43.474757      | 48.173123      | 50.105396      | 4.0268712      | 4.382858       | 2.8959186      | 3.441E-80 | -3.604667 | down      | PREDICTED: oleosin 1 [Sesamum indicum]                                                  |
| c52113.graph_c0 | 30.668226      | 28.159863      | 28.842398      | 68.787629      | 78.456225      | 68.828357      | 2.688E-13 | 1.341963  | up        | -                                                                                       |
| c52118.graph_c0 | 3.230003       | 5.2533645      | 3.3163884      | 16.892239      | 11.97806       | 10.350133      | 0.0001229 | 1.784255  | up        | PREDICTED: MLO-like protein 6 [Sesamum indicum]                                         |
| c52129.graph_c0 | 0.0734544      | 0.0994837      | 0.0599382      | 11.173067      | 19.826153      | 21.54041       | 8.196E-26 | 7.850026  | up        | PREDICTED: peroxidase 60 [Sesamum indicum]                                              |
| c52131.graph_c0 | 8.4172742      | 9.3397706      | 8.4407175      | 15.554353      | 19.133489      | 20.931827      | 2.079E-06 | 1.123797  | up        | PREDICTED: uncharacterized protein LOC105174462 isoform X1 [Sesamum indicum]            |
| c52133.graph_c0 | 4.9133774      | 4.7051869      | 5.3457011      | 0.7549173      | 0.5998075      | 0.6717209      | 9.942E-09 | -2.838958 | down      | -                                                                                       |
| c52161.graph_c0 | 0.3408294      | 0.4308318      | 0.1668684      | 5.3571275      | 6.5905862      | 7.0732269      | 1.058E-19 | 4.380094  | up        | PREDICTED: non-specific lipid-transfer protein-like protein At2g13820 [Sesamum indicum] |
| c52165.graph_c0 | 1.5452132      | 0.8526116      | 1.5410772      | 2.8291921      | 2.1902513      | 3.5824512      | 0.0073525 | 1.168375  | up        | hypothetical protein MIMGU_mgv1a011603mg [Erythranthe guttata]                          |
| c52171.graph_c0 | 6.2462583      | 6.2765355      | 8.1385916      | 17.495325      | 17.04603       | 27.04381       | 1.536E-05 | 1.613542  | up        | enolase [Prunus armeniaca]                                                              |
| c52178.graph_c0 | 0.7384988      | 0.6667951      | 0.7633047      | 6.9895584      | 6.2145663      | 6.6079713      | 8.865E-16 | 3.235275  | up        | PREDICTED: protein MIZU-KUSSEI 1 [Sesamum indicum]                                      |
| c52190.graph_c0 | 111.62668      | 134.44521      | 110.15871      | 38.438634      | 35.715492      | 23.975815      | 3.518E-22 | -1.812838 | down      | PREDICTED: probable E3 ubiquitin-protein ligase RHA2B [Sesamum indicum]                 |
| c52192.graph_c0 | 37.321234      | 33.249602      | 34.187452      | 9.9226775      | 9.2534099      | 10.259211      | 4.826E-19 | -1.788872 | down      | hypothetical protein MIMGU_mgv1a015849mg [Erythranthe guttata]                          |
| c52196.graph_c0 | 19.317999      | 16.86732       | 18.881351      | 63.773801      | 59.578765      | 63.689092      | 5.799E-11 | 1.806838  | up        | PREDICTED: aldo-keto reductase family 4 member C9-like [Sesamum indicum]                |
| c52203.graph_c0 | 4.4198441      | 3.3963445      | 4.3739092      | 0.8344116      | 1.1365173      | 2.2273633      | 0.0012415 | -1.507119 | down      | -                                                                                       |
| c52205.graph_c0 | 1.3200253      | 0.4469471      | 1.750336       | 66.301708      | 82.757491      | 78.907953      | 2.3E-134  | 6.054682  | up        | -                                                                                       |
| c52226.graph_c0 | 2.9453509      | 3.6489109      | 4.024268       | 15.454743      | 13.153129      | 10.970328      | 4.797E-09 | 1.944926  | up        | hypothetical protein MIMGU_mgv1a016982mg [Erythranthe guttata]                          |
| c52228.graph_c0 | 0.1768915      | 0.0532388      | 0.192456       | 2.4664525      | 4.0381295      | 3.1921958      | 2.81E-17  | 4.553368  | up        | NAC domain-containing protein 1 [Salvia miltiorrhiza]                                   |
| c52231.graph_c0 | 19.830278      | 20.574908      | 26.401141      | 38.586483      | 60.498996      | 50.618156      | 9.644E-06 | 1.198754  | up        | PREDICTED: L-ascorbate oxidase homolog [Nicotiana tomentosiformis]                      |
| c52233.graph_c0 | 58.375412      | 67.718081      | 55.264526      | 137.09454      | 145.86926      | 189.21132      | 3.074E-11 | 1.419474  | up        | PREDICTED: probable calcium-binding protein CML18 [Sesamum indicum]                     |
| c52235.graph_c0 | 11.958267      | 17.687509      | 6.2912444      | 64.122264      | 84.093455      | 55.014735      | 1.869E-12 | 2.541176  | up        | PREDICTED: pathogenesis-related protein SH-2-like [Sesamum indicum]                     |
| c52242.graph_c0 | 8.052864       | 6.3493075      | 6.3859706      | 3.3066867      | 2.2845872      | 3.1981195      | 0.0066857 | -1.195566 | down      | -                                                                                       |



| #ID             | 28 h-1<br>FPKM | 28 h-2<br>FPKM | 28 h-3<br>FPKM | 48 h-1<br>FPKM | 48 h-2<br>FPKM | 48 h-3<br>FPKM | FDR       | log2FC    | regulated | nr_annotation                                                                       |
|-----------------|----------------|----------------|----------------|----------------|----------------|----------------|-----------|-----------|-----------|-------------------------------------------------------------------------------------|
| c52256.graph_c0 | 14.129736      | 13.148372      | 13.804325      | 8.5288004      | 6.0665115      | 4.3907064      | 5.807E-05 | -1.061573 | down      | PREDICTED: uncharacterized protein LOC105165700 [Sesamum indicum]                   |
| c52272.graph_c0 | 0.3720278      | 0.1679531      | 0.3794646      | 22.046021      | 34.845288      | 29.267274      | 4.294E-42 | 6.583974  | up        | -                                                                                   |
| c52290.graph_c0 | 4.2329298      | 2.7207022      | 3.1613212      | 10.185451      | 14.258546      | 19.744291      | 4.85E-06  | 2.160438  | up        | hypothetical protein MIMGU_mgv1a011727mg [Erythranthe guttata]                      |
| c52292.graph_c0 | 20.41134       | 23.405498      | 23.317681      | 56.661599      | 49.336515      | 63.539422      | 4.611E-07 | 1.379001  | up        | hypothetical protein OsJ_01227 [Oryza sativa Japonica Group]                        |
| c52303.graph_c0 | 5.7307813      | 6.3717304      | 5.7970299      | 2.1012112      | 1.4627859      | 0.373929       | 1.895E-08 | -2.125438 | down      | PREDICTED: MATE efflux family protein DTX1 [Sesamum indicum]                        |
| c52308.graph_c0 | 19.144409      | 19.56316       | 16.236104      | 7.4924503      | 6.7745472      | 6.8790537      | 7.349E-16 | -1.333229 | down      | PREDICTED: cytochrome P450 703A2 [Sesamum indicum]                                  |
| c52313.graph_c0 | 28.360641      | 29.632381      | 24.690858      | 53.79791       | 54.68066       | 59.021079      | 1.271E-13 | 1.059941  | up        | PREDICTED: LRR receptor-like serine/threonine-protein kinase GSO1 [Sesamum indicum] |
| c52322.graph_c0 | 17.733277      | 15.210912      | 17.94306       | 35.245873      | 43.577725      | 40.722033      | 5.092E-16 | 1.27055   | up        | hypothetical protein MIMGU_mgv1a018712mg, partial [Erythranthe guttata]             |
| c52323.graph_c0 | 10.806844      | 7.7076577      | 12.375256      | 2.5324903      | 5.3657328      | 4.0970812      | 0.0004751 | -1.334569 | down      | PREDICTED: putative detensin-like protein 120 [Solanium lycopersicum]               |
| c52324.graph_c0 | 14.71209       | 13.057854      | 13.059204      | 6.0225129      | 6.1002922      | 5.1237608      | 3.01E-06  | -1.199934 | down      | PREDICTED: uncharacterized protein LOC105157576 isoform X2 [Sesamum indicum]        |
| c52330.graph_c0 | 2.5949753      | 2.4808441      | 1.4946908      | 7.3526029      | 4.0995743      | 5.8536385      | 0.0018916 | 1.448599  | up        | hypothetical protein MIMGU_mgv1a020446mg, partial [Erythranthe guttata]             |
| c52335.graph_c0 | 3.9928674      | 4.0293242      | 4.5518232      | 15.481481      | 13.79871       | 12.38455       | 4.717E-09 | 1.773578  | up        | PREDICTED: uncharacterized protein LOC105167003 isoform X1 [Sesamum indicum]        |
| c52336.graph_c0 | 0.3785462      | 0.7405487      | 0.87519        | 64.057997      | 126.91236      | 105.10196      | 1.694E-25 | 7.24494   | up        | hypothetical protein MIMGU_mgv1a020596mg [Erythranthe guttata]                      |
| c52337.graph_c0 | 0.7587686      | 1.21795        | 1.3070922      | 3.0991174      | 3.8491975      | 3.6133755      | 0.0001078 | 1.72371   | up        | PREDICTED: uncharacterized protein LOC105167350 [Sesamum indicum]                   |
| c52347.graph_c0 | 11.546894      | 14.866365      | 13.042727      | 41.537953      | 45.799059      | 54.686657      | 1.558E-26 | 1.88676   | up        | PREDICTED: LIM domain-containing protein WLIM1 [Sesamum indicum]                    |
| c52360.graph_c0 | 1.2431716      | 0.8017624      | 0.869501       | 6.753478       | 5.0081437      | 6.4098177      | 5.194E-09 | 2.686155  | up        | hypothetical protein MIMGU_mgv1a0032971mg, partial [Erythranthe guttata]            |
| c52371.graph_c0 | 44.481635      | 37.830716      | 49.878624      | 2.910129       | 2.9865873      | 2.9940114      | 2.101E-46 | -3.853021 | down      | hypothetical protein MIMGU_mgv1a015982mg [Erythranthe guttata]                      |
| c52372.graph_c0 | 6.5903287      | 7.5862297      | 5.4419291      | 14.876956      | 22.776675      | 27.777865      | 8.034E-06 | 1.771291  | up        | PREDICTED: ATP synthase gamma chain, chloroplastic-like [Sesamum indicum]           |
| c52377.graph_c0 | 8.8334236      | 7.682527       | 8.4800018      | 17.536501      | 17.792819      | 18.49755       | 5.221E-09 | 1.148004  | up        | PREDICTED: uncharacterized protein LOC105168503 isoform X2 [Sesamum indicum]        |
| c52393.graph_c0 | 2.3419079      | 3.2339767      | 3.3723136      | 152.61792      | 157.05546      | 146.05331      | 1.29E-146 | 5.712501  | up        | -                                                                                   |
| c52394.graph_c0 | 15.814945      | 18.642567      | 19.402108      | 68.353364      | 94.533925      | 93.95577       | 4.472E-25 | 2.289662  | up        | PREDICTED: protein RALF-like 34 [Phoenix dactylifera]                               |
| c52396.graph_c0 | 4.3194397      | 6.8000855      | 4.0668779      | 1.4038995      | 1.3385351      | 1.3740994      | 7.452E-05 | -1.839549 | down      | protein with unknown function [Ricinus communis]                                    |
| c52400.graph_c0 | 2.6445549      | 3.7653535      | 2.3239302      | 10.443293      | 12.29267       | 10.324866      | 4.99E-07  | 1.961607  | up        | hypothetical protein MIMGU_mgv1a005057mg [Erythranthe guttata]                      |
| c52403.graph_c0 | 8.8778617      | 12.120006      | 11.359004      | 28.448452      | 39.865673      | 42.215472      | 6.255E-13 | 1.807823  | up        | PREDICTED: dirigent protein 22-like [Sesamum indicum]                               |
| c52406.graph_c0 | 0.1612382      | 0.6551236      | 0.3947073      | 24.525762      | 31.070226      | 39.735818      | 1.955E-35 | 6.335265  | up        | hypothetical protein MIMGU_mgv1a016694mg [Erythranthe guttata]                      |
| c52420.graph_c0 | 2.8524712      | 3.0437893      | 2.063094       | 8.0531886      | 9.1407609      | 12.35714       | 2.595E-08 | 1.930247  | up        | flavonoid glycosyltransferase [Veronica persica]                                    |

| #ID             | 28 h-1<br>FPKM | 28 h-2<br>FPKM | 28 h-3<br>FPKM | 48 h-1<br>FPKM | 48 h-2<br>FPKM | 48 h-3<br>FPKM | FDR       | log2FC    | regulated | nr_annotation                                                               |
|-----------------|----------------|----------------|----------------|----------------|----------------|----------------|-----------|-----------|-----------|-----------------------------------------------------------------------------|
| c52432.graph_c0 | 0.9367638      | 0.7612289      | 0.6879524      | 10.805495      | 10.566565      | 10.354254      | 2.923E-26 | 3.775995  | up        | hypothetical protein MIMGU_mgv1a020209mg [Erythranthe guttata]              |
| c52443.graph_c0 | 2.9832242      | 2.8949603      | 2.6390397      | 23.218849      | 31.785882      | 35.502483      | 3.137E-27 | 3.445186  | up        | PREDICTED: cinnamoyl-CoA reductase 1-like [Sesamum indicum]                 |
| c52447.graph_c0 | 2.397686       | 1.1891626      | 1.7360424      | 4.2806249      | 2.947622       | 3.8088743      | 0.003067  | 1.098908  | up        | ATPase subunit 1 [Silene latifolia]                                         |
| c52460.graph_c0 | 4.3812683      | 4.7329213      | 3.830442       | 10.809647      | 13.027407      | 19.501444      | 2.69E-05  | 1.778865  | up        | hypothetical protein MIMGU_mgv1a007773mg [Erythranthe guttata]              |
| c52462.graph_c0 | 0.5262763      | 0.8145911      | 0.8588743      | 4.0978627      | 3.5335256      | 3.0526774      | 3.021E-07 | 2.326335  | up        | endo-beta-1,4-D-glucanase [Solanum lycopersicum]                            |
| c52465.graph_c0 | 7.3947248      | 7.112183       | 9.1822273      | 1.0188433      | 1.0793409      | 0.1813121      | 3.04E-11  | -3.327134 | down      | -                                                                           |
| c52471.graph_c0 | 13.016275      | 10.716817      | 13.429071      | 86.983692      | 125.36506      | 134.03954      | 1.314E-23 | 3.255034  | up        | PREDICTED: bidirectional sugar transporter SWEET14-like [Solanum tuberosum] |
| c52484.graph_c0 | 7.2979916      | 5.7906867      | 12.992949      | 51.019243      | 33.260739      | 50.634687      | 9.395E-09 | 2.416138  | up        | histone H4 [Zea mays]                                                       |
| c52487.graph_c0 | 2.6563055      | 4.0136403      | 3.5830492      | 8.3832993      | 9.4634556      | 9.2936903      | 1.721E-05 | 1.444509  | up        | PREDICTED: long chain acyl-CoA synthetase 4 [Sesamum indicum]               |
| c52489.graph_c0 | 8.8279772      | 10.656661      | 8.612949       | 4.6220025      | 4.1233273      | 3.2468132      | 0.0024919 | -1.18151  | down      | hypothetical protein MIMGU_mgv1a012466mg [Erythranthe guttata]              |
| c52491.graph_c0 | 6.9695028      | 5.5936067      | 7.4563641      | 3.1411051      | 1.2478575      | 1.9215188      | 0.0003398 | -1.60895  | down      | PREDICTED: cation/calcium exchanger 3-like [Sesamum indicum]                |
| c52492.graph_c0 | 1.1582337      | 0.7239991      | 0.5816057      | 8.9218138      | 4.9052503      | 3.1151375      | 0.0067306 | 2.840848  | up        | PREDICTED: uncharacterized protein LOC105168621 [Sesamum indicum]           |
| c52493.graph_c0 | 7.6018132      | 10.189991      | 6.2984485      | 4.7438071      | 2.5127442      | 2.7040852      | 0.0024921 | -1.218475 | down      | PREDICTED: E3 ubiquitin-protein ligase KHAZA-like [Sesamum indicum]         |
| c52501.graph_c0 | 53.611931      | 78.040042      | 64.358417      | 15.46459       | 24.920403      | 27.908212      | 2.273E-07 | -1.488034 | down      | -                                                                           |
| c52505.graph_c0 | 10.992536      | 8.7973625      | 9.1736793      | 2.5334271      | 1.6774118      | 2.5360068      | 1.11E-05  | -2.055632 | down      | PREDICTED: UDP-glycosyltransferase 73C3-like [Sesamum indicum]              |
| c52506.graph_c0 | 1.078598       | 1.2984972      | 0.749738       | 9.0640459      | 6.0081164      | 3.829812       | 0.0008882 | 2.651305  | up        | PREDICTED: uncharacterized protein LOC105159112 [Sesamum indicum]           |
| c52508.graph_c0 | 7.6353761      | 6.2916379      | 6.6538301      | 14.752515      | 26.777495      | 30.266657      | 7.839E-05 | 1.833456  | up        | hypothetical protein MIMGU_mgv1a018889mg [Erythranthe guttata]              |
| c52517.graph_c0 | 39.893974      | 42.257286      | 35.888993      | 16.081871      | 15.901006      | 12.878597      | 1.065E-06 | -1.351333 | down      | PREDICTED: uncharacterized protein LOC105169022 [Sesamum indicum]           |
| c52518.graph_c0 | 25.964535      | 23.309578      | 23.72927       | 37.613669      | 49.211195      | 58.737071      | 2.495E-05 | 1.031289  | up        | PREDICTED: protein YLS9 [Sesamum indicum]                                   |
| c52533.graph_c0 | 12.687838      | 21.064126      | 14.138203      | 267.00855      | 331.59479      | 267.74205      | 1.593E-88 | 4.217453  | up        | -                                                                           |
| c52540.graph_c0 | 26.36447       | 21.996697      | 23.903547      | 42.161406      | 56.565578      | 50.940054      | 4.683E-13 | 1.087681  | up        | PREDICTED: flavonol synthase/flavanone 3-hydroxylase-like [Sesamum indicum] |
| c52543.graph_c0 | 8.4221218      | 9.4845918      | 9.2890446      | 2.1703264      | 3.6041477      | 5.636851       | 0.0002004 | -1.222868 | down      | -                                                                           |
| c52548.graph_c0 | 14.646935      | 11.172684      | 11.95178       | 5.921936       | 4.7475688      | 6.1237846      | 0.0048901 | -1.125318 | down      | -                                                                           |
| c52556.graph_c0 | 10.953361      | 10.277696      | 8.0615932      | 5.1725422      | 3.3166492      | 3.9969052      | 0.0036352 | -1.180291 | down      | -                                                                           |
| c52585.graph_c0 | 1.5074498      | 2.0416287      | 1.8963528      | 2.7069718      | 4.3859069      | 4.888137       | 0.0051562 | 1.170449  | up        | hypothetical protein MIMGU_mgv1a017183mg [Erythranthe guttata]              |
| c52587.graph_c0 | 0.1971621      | 0.1780189      | 0.2011034      | 1.3745464      | 1.3237866      | 1.1674694      | 2.462E-09 | 2.789687  | up        | -                                                                           |
| c52603.graph_c0 | 1.6613751      | 1.6200712      | 1.5183487      | 6.9074021      | 12.493387      | 10.418499      | 4.816E-10 | 2.668121  | up        | -                                                                           |
| c52609.graph_c0 | 0.7424256      | 1.3406815      | 2.1203464      | 4.1172215      | 5.3586562      | 9.001691       | 0.0010538 | 2.168135  | up        | -                                                                           |

| #ID             | 28 h-1<br>FPKM | 28 h-2<br>FPKM | 28 h-3<br>FPKM | 48 h-1<br>FPKM | 48 h-2<br>FPKM | 48 h-3<br>FPKM | FDR       | log2FC    | regulated | nr_annotation                                                                                               |
|-----------------|----------------|----------------|----------------|----------------|----------------|----------------|-----------|-----------|-----------|-------------------------------------------------------------------------------------------------------------|
| c52612.graph_c0 | 0.1488902      | 0.1344339      | 0.1214932      | 5.2844211      | 5.5982034      | 3.5265346      | 6.654E-16 | 5.198324  | up        | -                                                                                                           |
| c52616.graph_c0 | 0.3392559      | 0.8423698      | 0.5536601      | 14.29856       | 17.653207      | 13.009752      | 9.998E-29 | 4.73659   | up        | PREDICTED: reticuline oxidase-like protein [Sesamum indicum]                                                |
| c52620.graph_c0 | 0.162164       | 0.2928379      | 0.1984868      | 10.174966      | 12.738987      | 18.838853      | 1.124E-17 | 6.032934  | up        | PREDICTED: probable pectate lyase 8 [Sesamum indicum]                                                       |
| c52626.graph_c0 | 0.5761727      | 0.6358365      | 0.9403044      | 29.173077      | 48.571671      | 45.598039      | 1.285E-33 | 5.873314  | up        | PREDICTED: probable pectinesterase/pectinesterase inhibitor 46 [Sesamum indicum]                            |
| c52638.graph_c0 | 23.10821       | 21.875081      | 20.682629      | 57.748205      | 54.988774      | 62.893429      | 2.347E-18 | 1.461334  | up        | hypothetical protein MIMGU_mgv1a016092mg [Erythranthe guttata]                                              |
| c52646.graph_c0 | 4.713662       | 6.9841967      | 5.9173996      | 29.108554      | 44.794777      | 39.53252       | 3.604E-19 | 2.722371  | up        | -                                                                                                           |
| c52659.graph_c0 | 0.581544       | 0.6300956      | 0.9965238      | 2.5800245      | 3.514144       | 2.2956903      | 1.245E-05 | 1.964234  | up        | PREDICTED: LOW QUALITY PROTEIN: phototropin-1 [Sesamum indicum]                                             |
| c52660.graph_c0 | 2.1055535      | 1.442227       | 1.2441518      | 10.491711      | 9.7497332      | 8.5165614      | 7.78E-12  | 2.630331  | up        | PREDICTED: protein RADIALIS-like 3 [Sesamum indicum]                                                        |
| c52674.graph_c0 | 122.50936      | 129.24427      | 147.31925      | 29.423299      | 24.763165      | 28.071501      | 2.196E-38 | -2.234208 | down      | hypothetical protein PHAVU_005G056100g [Phaseolus vulgaris]                                                 |
| c52675.graph_c0 | 29.590502      | 27.875205      | 31.550261      | 6.8764925      | 5.827848       | 6.1186617      | 2.692E-14 | -2.196732 | down      | PREDICTED: uncharacterized protein LOC102595511 [Solanum tuberosum]                                         |
| c52679.graph_c0 | 17.566575      | 29.332496      | 25.913222      | 2.0821024      | 1.8993829      | 2.5731141      | 3.285E-14 | -3.43229  | down      | PREDICTED: transcription factor TGA5-like [Sesamum indicum]                                                 |
| c52690.graph_c0 | 0.1927172      | 0.406013       | 1.048371       | 21.252641      | 38.732007      | 45.86333       | 8.67E-16  | 6.034414  | up        | PREDICTED: 21 kDa protein-like [Sesamum indicum]                                                            |
| c52694.graph_c0 | 18.422984      | 20.305746      | 18.283384      | 3.0505504      | 6.0176265      | 13.946202      | 0.003322  | -1.283088 | down      | PREDICTED: expansin-A10-like isoform X2 [Camelina sativa]                                                   |
| c52697.graph_c0 | 0.1073859      | 0.0969594      | 0.175252       | 3.9474664      | 5.4796812      | 6.9037454      | 5.391E-18 | 5.460232  | up        | MYB-related transcription factor [Salvia miltiorrhiza]                                                      |
| c52698.graph_c0 | 4.7834846      | 6.838477       | 5.8549266      | 2.5264246      | 2.6764405      | 1.5735982      | 0.0029228 | -1.321553 | down      | -                                                                                                           |
| c52705.graph_c0 | 5.2464377      | 3.6091744      | 2.4463145      | 19.950739      | 11.741882      | 17.18849       | 3.588E-06 | 2.16249   | up        | PREDICTED: succinate dehydrogenase [ubiquinone] iron-sulfur subunit 2, mitochondrial-like [Sesamum indicum] |
| c52711.graph_c0 | 37.561981      | 34.208583      | 31.579066      | 7.4201419      | 11.136049      | 10.637196      | 3.003E-08 | -1.788656 | down      | PREDICTED: 7-deoxyloganic acid glucosyltransferase-like [Sesamum indicum]                                   |
| c52717.graph_c0 | 3.6687492      | 7.6602409      | 6.9228605      | 24.995953      | 28.635545      | 23.017106      | 3.64E-11  | 2.111569  | up        | PREDICTED: pleiotropic drug resistance protein 1-like [Sesamum indicum]                                     |
| c52718.graph_c0 | 5.1341685      | 7.262554       | 6.2841593      | 34.925927      | 32.403538      | 25.093133      | 1.409E-11 | 2.352717  | up        | hypothetical protein M569_04419, partial [Genlisea aurea]                                                   |
| c52721.graph_c0 | 0.2904212      | 0.1966673      | 0.177736       | 2.3928464      | 4.3873799      | 4.0126107      | 6.285E-13 | 4.053206  | up        | PREDICTED: transcription repressor OPR1 / [Nicotiana tomentosiformis]                                       |
| c52739.graph_c0 | 7.8088477      | 6.385501       | 8.4157909      | 2.054362       | 1.5827981      | 3.1573836      | 0.0001959 | -1.694712 | down      | -                                                                                                           |
| c52742.graph_c0 | 1.6885399      | 2.2673438      | 1.3425057      | 10.591982      | 14.011616      | 12.794128      | 2.555E-21 | 2.857743  | up        | PREDICTED: palmitoyl-protein thioesterase 1-like [Sesamum indicum]                                          |
| c52750.graph_c0 | 7.6329325      | 8.452235       | 5.6799971      | 17.646781      | 36.422286      | 31.024986      | 3.31E-05  | 1.998339  | up        | -                                                                                                           |
| c52758.graph_c0 | 18.387957      | 24.545572      | 21.697043      | 3.1021558      | 2.2205121      | 2.6856774      | 4.347E-23 | -2.965293 | down      | PREDICTED: auxin-induced protein X15-like [Sesamum indicum]                                                 |
| c52764.graph_c0 | 2.1602721      | 3.0341471      | 2.4809276      | 6.7950506      | 5.801802       | 8.3924798      | 0.0001723 | 1.493432  | up        | -                                                                                                           |
| c52769.graph_c0 | 10.898518      | 12.115563      | 11.103526      | 26.032276      | 37.052704      | 42.845115      | 2.816E-08 | 1.6692    | up        | PREDICTED: uncharacterized protein LOC105168965 [Sesamum indicum]                                           |
| c52771.graph_c0 | 2.6809729      | 1.8577213      | 2.0859007      | 10.274023      | 9.4607782      | 7.8759809      | 5.758E-09 | 2.104568  | up        | PREDICTED: CASP-like protein 2C1 isoform X2 [Sesamum indicum]                                               |

| #ID             | 28 h-1<br>FPKM | 28 h-2<br>FPKM | 28 h-3<br>FPKM | 48 h-1<br>FPKM | 48 h-2<br>FPKM | 48 h-3<br>FPKM | FDR       | log2FC    | regulated | nr_annotation                                                                   |
|-----------------|----------------|----------------|----------------|----------------|----------------|----------------|-----------|-----------|-----------|---------------------------------------------------------------------------------|
| c52778.graph_c0 | 41.434853      | 51.929794      | 38.150357      | 10.347564      | 23.584887      | 10.183722      | 1.984E-06 | -1.543148 | down      | PREDICTED: uncharacterized protein LOC104588233 isoform X2 [Nelumbo nucifera]   |
| c52789.graph_c0 | 155.60666      | 167.92425      | 146.78322      | 57.191435      | 81.101232      | 66.115104      | 6.471E-16 | -1.164855 | down      | hypothetical protein MIMGU_mgv1a008833mg [Erythranthe guttata]                  |
| c52791.graph_c0 | 23.78866       | 24.44154       | 30.694798      | 3.4164492      | 4.5634825      | 2.2469092      | 1.259E-17 | -2.907173 | down      | hypothetical protein MIMGU_mgv1a018283mg [Erythranthe guttata]                  |
| c52792.graph_c0 | 39.700647      | 41.879441      | 46.027134      | 15.694951      | 15.307303      | 15.295299      | 3.987E-06 | -1.420232 | down      | -                                                                               |
| c52795.graph_c0 | 37.322778      | 40.653863      | 42.118731      | 11.072406      | 13.329399      | 12.718243      | 4.258E-14 | -1.655024 | down      | PREDICTED: protein ELF4-LIKE 3 [Sesamum indicum]                                |
| c52802.graph_c0 | 0.1447145      | 0.2613273      | 0.3542577      | 1.7426453      | 4.0808998      | 2.7747494      | 4.909E-06 | 3.528623  | up        | PREDICTED: adenine phosphoribosyltransferase 3 [Nicotiana tomentosiformis]      |
| c52812.graph_c0 | 14.951907      | 12.400156      | 12.923634      | 3.5097487      | 3.1232486      | 0.999345       | 2.162E-09 | -2.347435 | down      | PREDICTED: peamaclein [Vitis vinifera]                                          |
| c52825.graph_c0 | 0              | 0              | 0.3276424      | 4.4110262      | 6.1107774      | 11.774714      | 1.554E-06 | 6.114385  | up        | hypothetical protein MIMGU_mgv1a016882mg [Erythranthe guttata]                  |
| c52837.graph_c0 | 3.2137282      | 3.5713172      | 3.4796911      | 7.4422217      | 7.8011406      | 8.2252759      | 0.0006587 | 1.233837  | up        | hypothetical protein CISIN_1g041913mg [Citrus sinensis]                         |
| c52841.graph_c0 | 6.6772697      | 5.3438407      | 6.5630834      | 23.981138      | 33.013055      | 32.520897      | 1.393E-26 | 2.304032  | up        | PREDICTED: probable calcium-binding protein CML49 [Sesamum indicum]             |
| c52842.graph_c0 | 0.2429314      | 0.2924591      | 0.506588       | 5.8507365      | 13.3387        | 32.849241      | 0.0019733 | 5.664884  | up        | PREDICTED: endoglucanase 1-like [Sesamum indicum]                               |
| c52850.graph_c0 | 1.3020602      | 0.8708432      | 1.4166274      | 61.922711      | 97.201387      | 93.335588      | 3.146E-45 | 6.169604  | up        | PREDICTED: aquaporin TIP4-1 [Sesamum indicum]                                   |
| c52853.graph_c0 | 0.6683558      | 0.1508657      | 0.5453729      | 30.49885       | 21.988636      | 16.772602      | 2.566E-13 | 5.715478  | up        | -                                                                               |
| c52857.graph_c0 | 0.229622       | 0.1382181      | 0.1249131      | 2.6195656      | 1.8500748      | 1.8129018      | 1.419E-11 | 3.722159  | up        | PREDICTED: basic leucine zipper 43 [Sesamum indicum]                            |
| c52876.graph_c0 | 11.574791      | 14.84338       | 12.73013       | 30.194345      | 24.778854      | 24.217913      | 0.0017865 | 1.063011  | up        | PREDICTED: muscle M-line assembly protein unc-89-like [Populus euphratica]      |
| c52882.graph_c0 | 32.420423      | 36.946003      | 35.701139      | 10.373564      | 7.6081386      | 7.1002578      | 3.367E-07 | -2.017363 | down      | -                                                                               |
| c52891.graph_c0 | 1.5768851      | 0.776607       | 1.9885756      | 5.0879004      | 9.8175247      | 9.7011069      | 1.545E-06 | 2.532036  | up        | PREDICTED: anthocyanidin 3-O-glucosyltransferase 2-like [Sesamum indicum]       |
| c52908.graph_c0 | 23.609768      | 23.962632      | 23.437199      | 8.9562912      | 10.413773      | 9.7186025      | 8.221E-08 | -1.247732 | down      | PREDICTED: transcription factor TCP9 [Sesamum indicum]                          |
| c52909.graph_c0 | 1.8537224      | 1.2553031      | 0.945389       | 6.2659457      | 4.9785073      | 5.3140539      | 7.341E-07 | 2.076679  | up        | PREDICTED: glucan endo-1,3-beta-glucosidase 4-like isoform X1 [Sesamum indicum] |
| c52916.graph_c0 | 0.0450932      | 0              | 0.0367957      | 2.8579494      | 2.9065448      | 2.5938459      | 3.095E-23 | 6.714055  | up        | PREDICTED: pectinesterase/pectinesterase inhibitor PPE8B-like [Sesamum indicum] |
| c52919.graph_c0 | 0.9258821      | 2.0899618      | 1.7628619      | 7.2373465      | 7.4598724      | 9.9206919      | 6.441E-08 | 2.404291  | up        | V-type proton ATPase subunit [Morus notabilis]                                  |
| c52926.graph_c0 | 5.3383757      | 10.088482      | 8.7121419      | 16.366176      | 17.754757      | 24.574261      | 3.233E-05 | 1.319819  | up        | -                                                                               |
| c52935.graph_c0 | 1.237877       | 1.8235944      | 1.5948909      | 6.9783672      | 6.999038       | 8.7444709      | 1.121E-13 | 2.327109  | up        | PREDICTED: GDSL esterase/lipase At4g10955-like [Sesamum indicum]                |
| c52942.graph_c0 | 0              | 0.129777       | 0.0586423      | 3.1883532      | 9.457486       | 8.8351584      | 9.553E-09 | 6.860157  | up        | -                                                                               |
| c52943.graph_c0 | 18.166092      | 12.900668      | 21.152468      | 1.5523726      | 0.5481835      | 0.6906459      | 6.804E-15 | -4.164387 | down      | -                                                                               |
| c52953.graph_c0 | 11.820439      | 16.332538      | 12.27594       | 37.231172      | 44.492401      | 37.168082      | 1.775E-07 | 1.596781  | up        | -                                                                               |

| #ID             | 28 h-1<br>FPKM | 28 h-2<br>FPKM | 28 h-3<br>FPKM | 48 h-1<br>FPKM | 48 h-2<br>FPKM | 48 h-3<br>FPKM | FDR       | log2FC    | regulated | nr_annotation                                                                   |
|-----------------|----------------|----------------|----------------|----------------|----------------|----------------|-----------|-----------|-----------|---------------------------------------------------------------------------------|
| c52961.graph_c0 | 9.6255779      | 13.238608      | 11.324939      | 2.9793454      | 5.4107233      | 6.3119135      | 0.002963  | -1.186575 | down      | -                                                                               |
| c52970.graph_c0 | 25.191927      | 23.491717      | 26.903057      | 12.73815       | 12.939956      | 9.9369463      | 1.18E-05  | -1.04188  | down      | hypothetical protein MIMGU_mgv1a014883mg [Erythranthe guttata]                  |
| c52974.graph_c0 | 29.858446      | 27.556263      | 31.556646      | 308.0893       | 425.80735      | 545.66238      | 1.433E-16 | 3.880177  | up        | -                                                                               |
| c52975.graph_c0 | 10.610114      | 7.0744157      | 7.4589985      | 1.0345462      | 2.4111478      | 2.0251726      | 2.879E-06 | -2.171382 | down      | -                                                                               |
| c52984.graph_c0 | 5.8120718      | 6.1223819      | 6.5094553      | 1.3000992      | 1.300781       | 0.8354815      | 5.386E-09 | -2.378671 | down      | -                                                                               |
| c52986.graph_c0 | 0              | 0.0852407      | 0.0770354      | 2.8720285      | 3.2327263      | 5.2175071      | 1.956E-14 | 6.160328  | up        | PREDICTED: thioredoxin H2 [Sesamum indicum]                                     |
| c52989.graph_c0 | 6.0654077      | 5.0988052      | 5.2906558      | 0.7953467      | 1.1234311      | 1.1794911      | 7.106E-07 | -2.37364  | down      | -                                                                               |
| c52991.graph_c0 | 8.4075419      | 8.5190381      | 9.5284522      | 4.4996976      | 2.759775       | 2.844808       | 0.0007167 | -1.336674 | down      | hypothetical protein M569_07000 [Genlisea aurea]                                |
| c53005.graph_c0 | 5.0727419      | 5.009605       | 4.2686696      | 1.9089282      | 1.1707925      | 2.1455404      | 0.0014781 | -1.41163  | down      | -                                                                               |
| c53014.graph_c0 | 1.9971903      | 1.5027297      | 1.2222682      | 12.235998      | 18.102881      | 24.403057      | 9.397E-10 | 3.56824   | up        | unknown [Picea sitchensis]                                                      |
| c53027.graph_c0 | 2.3663954      | 1.8398785      | 2.9500767      | 0.9998601      | 0.2648076      | 0.0741391      | 1.92E-05  | -2.34111  | down      | -                                                                               |
| c53033.graph_c0 | 3.5112571      | 5.9255089      | 5.4233332      | 22.518812      | 23.855951      | 23.997379      | 7.163E-26 | 2.284637  | up        | PREDICTED: pleiotropic drug resistance protein 1-like [Sesamum indicum]         |
| c53039.graph_c0 | 6.5275401      | 9.4545681      | 7.3238267      | 1.379023       | 1.0956807      | 0.766904       | 2.963E-09 | -2.795558 | down      | PREDICTED: prenaspirodiene oxygenase-like [Sesamum indicum]                     |
| c53045.graph_c0 | 5.6515236      | 8.4660024      | 5.9391781      | 3.4190493      | 2.9896436      | 1.0140832      | 0.0008005 | -1.381022 | down      | PREDICTED: uncharacterized protein At1g76070 [Sesamum indicum]                  |
| c53051.graph_c0 | 6.7428509      | 5.3671956      | 9.2667138      | 104.3641       | 71.840895      | 87.15871       | 1.36E-19  | 3.669968  | up        | PREDICTED: histone H2A.1 [Sesamum indicum]                                      |
| c53052.graph_c0 | 0.1927172      | 0.1740056      | 0.2620928      | 24.102612      | 36.575437      | 37.531129      | 3.926E-47 | 7.320702  | up        | unnamed protein product [Coffea canephora]                                      |
| c53054.graph_c0 | 180.1795       | 208.61068      | 212.44761      | 63.107981      | 66.855254      | 52.992971      | 5.424E-23 | -1.673597 | down      | PREDICTED: LOW QUALITY PROTEIN: 36.4 kDa proline-rich protein [Sesamum indicum] |
| c53073.graph_c0 | 4.8473404      | 3.6472449      | 2.8017347      | 0.6400376      | 1.220476       | 1.7085048      | 0.0007154 | -1.632932 | down      | -                                                                               |
| c53082.graph_c0 | 4.1493208      | 4.3458793      | 4.6047042      | 21.985001      | 26.187819      | 35.661093      | 6.952E-13 | 2.714099  | up        | hypothetical protein SORBIDRAFT_07g000600 [Sorghum bicolor]                     |
| c53101.graph_c0 | 0.863915       | 0.3600158      | 1.0845348      | 9.6029737      | 14.278156      | 16.639617      | 1.894E-18 | 4.16588   | up        | -                                                                               |
| c53108.graph_c0 | 17.837362      | 22.660016      | 21.240353      | 0.5258179      | 2.2281613      | 1.9884459      | 2.072E-21 | -3.680339 | down      | -                                                                               |
| c53119.graph_c0 | 33.921463      | 38.817179      | 34.192493      | 7.5878741      | 7.5512548      | 5.7286682      | 1.114E-11 | -2.312618 | down      | -                                                                               |
| c53137.graph_c0 | 0.980642       | 4.7222816      | 2.1338557      | 16.159468      | 14.924254      | 28.019831      | 6.093E-06 | 2.954074  | up        | -                                                                               |
| c53141.graph_c0 | 6.2030957      | 8.0011626      | 6.7303597      | 2.3329426      | 3.2952931      | 2.6909015      | 0.0009393 | -1.293946 | down      | PREDICTED: squamosa promoter-binding-like protein 9 [Sesamum indicum]           |
| c53173.graph_c0 | 14.431817      | 15.20234       | 14.516628      | 28.763193      | 33.091631      | 38.850653      | 2.3E-12   | 1.227811  | up        | PREDICTED: 30S ribosomal protein 2, chloroplastic [Sesamum indicum]             |
| c53202.graph_c0 | 1.0097751      | 0.663078       | 0.749062       | 2.2108473      | 2.3421247      | 3.8308606      | 8.1E-05   | 1.827933  | up        | PREDICTED: glutathione S-transferase U17-like [Sesamum indicum]                 |
| c53219.graph_c0 | 0              | 0.1791172      | 0              | 14.081726      | 7.7253316      | 9.1736295      | 9.561E-12 | 7.492181  | up        | PREDICTED: CBL-interacting serine/threonine-protein kinase 5 [Sesamum indicum]  |
| c53222.graph_c0 | 9.6372751      | 11.948405      | 7.5118212      | 24.431912      | 22.405875      | 26.444157      | 2.515E-05 | 1.375675  | up        | PREDICTED: zeatin O-glucosyltransferase-like [Solanum lycopersicum]             |

| #ID             | 28 h-1<br>FPKM | 28 h-2<br>FPKM | 28 h-3<br>FPKM | 48 h-1<br>FPKM | 48 h-2<br>FPKM | 48 h-3<br>FPKM | FDR       | log2FC    | regulated | nr_annotation                                                     |
|-----------------|----------------|----------------|----------------|----------------|----------------|----------------|-----------|-----------|-----------|-------------------------------------------------------------------|
| c53235.graph_c0 | 4.0305525      | 4.0347774      | 3.2888979      | 18.881169      | 22.237861      | 17.294478      | 7.997E-14 | 2.404339  | up        | PREDICTED: elicitor-responsive protein 3-like [Sesamum indicum]   |
| c53256.graph_c0 | 0.1664325      | 0.3005459      | 0.2716152      | 11.814067      | 20.114312      | 18.583866      | 3.561E-24 | 6.128998  | up        | hypothetical protein MIMGU_mgv1a010045mg [Erythranthe guttata]    |
| c53267.graph_c0 | 6.649608       | 6.2110061      | 6.4550997      | 17.729688      | 16.781045      | 19.008509      | 9.304E-06 | 1.51234   | up        | hypothetical protein JCGZ_13755 [Jatropha curcas]                 |
| c53275.graph_c0 | 10.267603      | 12.301483      | 9.1838842      | 3.0034484      | 3.9772368      | 2.4497461      | 0.0001096 | -1.710797 | down      | ATP binding protein, putative [Ricinus communis]                  |
| c53282.graph_c0 | 16.628756      | 15.218482      | 14.676597      | 2.4376118      | 5.1647083      | 6.1241572      | 4.373E-06 | -1.732452 | down      | -                                                                 |
| c53299.graph_c0 | 9.3210463      | 11.221374      | 8.5652         | 29.058791      | 29.769399      | 33.14915       | 7.657E-12 | 1.70106   | up        | PREDICTED: probable polygalacturonase [Sesamum indicum]           |
| c53313.graph_c0 | 5.9663498      | 6.9433147      | 6.7077011      | 0.6722478      | 2.4925776      | 1.6449457      | 1.056E-05 | -2.003892 | down      | PREDICTED: uncharacterized protein LOC100815796 [Glycine max]     |
| c53316.graph_c0 | 4.8657474      | 5.0618614      | 5.6966754      | 1.3408029      | 0.8522508      | 2.6246843      | 0.0003173 | -1.65896  | down      | -                                                                 |
| c53342.graph_c0 | 29.329529      | 29.81519       | 36.484748      | 10.919218      | 12.118425      | 17.118411      | 0.0005145 | -1.215065 | down      | hypothetical protein MIMGU_mgv1a006294mg [Erythranthe guttata]    |
| c53357.graph_c0 | 12.563498      | 13.234271      | 14.134936      | 1.9303224      | 1.0224712      | 0.4293973      | 7.718E-13 | -3.499205 | down      | -                                                                 |
| c53377.graph_c0 | 18.12242       | 20.752878      | 21.279928      | 53.973692      | 52.628038      | 60.987358      | 3.438E-10 | 1.51943   | up        | -                                                                 |
| c53394.graph_c0 | 3.4626808      | 2.4425595      | 2.1191394      | 6.8581296      | 8.1371995      | 10.129855      | 2.829E-05 | 1.683988  | up        | uncharacterized protein [Arabidopsis thaliana]                    |
| c53452.graph_c0 | 2.8721826      | 3.8035236      | 4.2967421      | 1.0922109      | 1.2856278      | 1.4037728      | 0.0009006 | -1.498782 | down      | PREDICTED: trihelix transcription factor GT-3b [Sesamum indicum]  |
| c53474.graph_c0 | 5.0555212      | 4.8413078      | 4.37528        | 0.5825678      | 0              | 0.3455769      | 5.088E-12 | -3.873079 | down      | -                                                                 |
| c53487.graph_c0 | 6.3186279      | 6.3237569      | 6.2119864      | 29.721355      | 36.393108      | 37.264653      | 7.743E-25 | 2.493095  | up        | PREDICTED: rapid alkalization factor-like [Sesamum indicum]       |
| c53497.graph_c0 | 12.141353      | 11.25099       | 9.6465276      | 28.75511       | 24.884902      | 23.063548      | 0.0019933 | 1.261135  | up        | PREDICTED: UDP-arabinopyranose mutase 3-like [Sesamum indicum]    |
| c53512.graph_c0 | 4.5079379      | 3.0877723      | 2.4100128      | 19.703943      | 15.446714      | 12.09739       | 5.303E-07 | 2.289137  | up        | PREDICTED: uncharacterized protein LOC105165055 [Sesamum indicum] |
| c53532.graph_c0 | 5.3338708      | 6.5497399      | 5.5710656      | 22.446766      | 23.779627      | 25.267045      | 8.994E-08 | 2.074957  | up        | hypothetical protein MIMGU_mgv1a011661mg [Erythranthe guttata]    |
| c53541.graph_c0 | 0.5205314      | 0.3655486      | 0.8494987      | 1.6128734      | 2.2523032      | 1.8917558      | 8.387E-05 | 1.765646  | up        | -                                                                 |
| c53554.graph_c0 | 42.895024      | 43.448583      | 41.575967      | 19.87222       | 20.175032      | 15.471909      | 0.0002087 | -1.160093 | down      | -                                                                 |
| c53594.graph_c0 | 2.8153338      | 1.694655       | 1.9144078      | 11.003316      | 15.437223      | 15.612172      | 7.263E-10 | 2.746223  | up        | PREDICTED: adenosine kinase 2 [Sesamum indicum]                   |
| c53622.graph_c0 | 15.515892      | 15.780699      | 16.881122      | 0.6781909      | 2.155383       | 2.2126507      | 2.797E-12 | -3.230829 | down      | -                                                                 |
| c53626.graph_c0 | 14.205555      | 22.21137       | 16.82198       | 45.455652      | 60.484229      | 60.766944      | 1.792E-10 | 1.68397   | up        | -                                                                 |
| c53764.graph_c0 | 16.709857      | 16.110311      | 15.021728      | 45.951944      | 31.946587      | 47.595912      | 2.811E-05 | 1.436923  | up        | -                                                                 |
| c53783.graph_c0 | 8.28472        | 13.984956      | 11.463056      | 28.764958      | 33.375175      | 30.063836      | 0.0002574 | 1.491109  | up        | -                                                                 |
| c53824.graph_c0 | 20.123768      | 15.276583      | 18.826429      | 11.048206      | 6.1963594      | 8.5295148      | 0.0038941 | -1.022458 | down      | -                                                                 |
| c53904.graph_c0 | 5.5646843      | 6.5130958      | 5.5497896      | 11.494832      | 16.882278      | 13.714862      | 0.0020884 | 1.292465  | up        | PREDICTED: alpha-galactosidase-like [Sesamum indicum]             |
| c53936.graph_c0 | 2.0530371      | 4.07814        | 4.2439957      | 6.2457017      | 7.1679439      | 8.7991973      | 0.0092366 | 1.135873  | up        | -                                                                 |
| c53939.graph_c0 | 10.330629      | 7.2002446      | 6.3592542      | 17.115177      | 29.813466      | 36.181607      | 0.0001765 | 1.829897  | up        | -                                                                 |
| c53976.graph_c0 | 0.0640676      | 0              | 0.0522786      | 1.0557351      | 1.7206513      | 1.951034       | 1.499E-15 | 5.374948  | up        | PREDICTED: uncharacterized protein LOC105155653 [Sesamum indicum] |

| #ID             | 28 h-1<br>FPKM | 28 h-2<br>FPKM | 28 h-3<br>FPKM | 48 h-1<br>FPKM | 48 h-2<br>FPKM | 48 h-3<br>FPKM | FDR       | log2FC   | regulated | nr_annotation                                                  |
|-----------------|----------------|----------------|----------------|----------------|----------------|----------------|-----------|----------|-----------|----------------------------------------------------------------|
| c53979.graph_c0 | 6.1981967      | 8.309792       | 8.2762002      | 13.332532      | 23.204045      | 22.667199      | 0.0002338 | 1.410087 | up        | -                                                              |
| c53999.graph_c0 | 3.8149489      | 4.8223576      | 4.5656851      | 21.599588      | 17.417752      | 12.621553      | 1.457E-05 | 2.016998 | up        | -                                                              |
| c54007.graph_c0 | 2.7145251      | 1.5479758      | 2.5647719      | 25.534807      | 39.137662      | 48.825371      | 1.36E-13  | 4.087299 | up        | PREDICTED: probable aquaporin PIP2-5 [Sesamum indicum]         |
| c54095.graph_c0 | 3.5794578      | 2.4624113      | 3.0598945      | 16.636497      | 13.504373      | 20.570479      | 5.221E-10 | 2.519991 | up        | -                                                              |
| c54198.graph_c0 | 6.1894155      | 7.1125878      | 5.9687875      | 17.830773      | 17.000587      | 11.106         | 0.0032392 | 1.300073 | up        | -                                                              |
| c54753.graph_c0 | 4.1691461      | 3.764348       | 3.8272378      | 18.166155      | 15.045965      | 22.042003      | 8.121E-08 | 2.274299 | up        | Aldo-keto reductase family 4 member C9 [Gossypium arboreum]    |
| c55343.graph_c0 | 1.3420048      | 1.6660937      | 2.1901299      | 5.1032696      | 5.1810331      | 6.2436806      | 0.000118  | 1.70847  | up        | -                                                              |
| c55911.graph_c0 | 0.7905649      | 1.9034825      | 1.1826732      | 4.3424298      | 4.6002778      | 6.3902431      | 4.618E-06 | 2.022695 | up        | -                                                              |
| c58690.graph_c0 | 0              | 0              | 0.3177979      | 6.9114058      | 8.3677673      | 11.640555      | 1.178E-18 | 6.435017 | up        | hypothetical protein MIMGU_mgv1a015676mg [Erythranthe guttata] |
| c64432.graph_c0 | 5.8691018      | 4.2898679      | 7.52579        | 19.130191      | 16.888431      | 18.598034      | 8.906E-05 | 1.669685 | up        | -                                                              |

Transcriptomic analysis of seed germination improvement of *Andrographis paniculata* responding to air plasma treatment

Jia-Yun Tong 1\*, Rui He 2\*, Xiao-Ting Tang 2, Ming-Zhi Li 3 and Jing-Lin Wan 4
