# Supplementary material for: Transcriptomic analysis of seed germination improvement of Andrographis paniculata responding to air plasma treatment
Source: PubMed Central journal article supplement (PMC7580921; doi:10.1371/journal.pone.0240939), 2020-10-22
Supplement: pone.0240939.s008.pdf [file pone.0240939.s008.pdf]

**S6 Table. Differentially expressed genes of plasma-treated groups (48 HAS vs. 0 HAS).**

| #ID             | 0 h-1<br>FPKM | 0 h-2<br>FPKM | 0 h-3<br>FPKM | 48 h-1<br>FPKM | 48 h-2<br>FPKM | 48 h-3<br>FPKM | FDR       | log2FC    | regulated | nr_annotation                                                                    |
|-----------------|---------------|---------------|---------------|----------------|----------------|----------------|-----------|-----------|-----------|----------------------------------------------------------------------------------|
| c13791.graph_c0 | 0             | 0             | 0             | 40.7062495     | 45.402211      | 45.9377843     | 2.754E-37 | Inf       | up        | --                                                                               |
| c13810.graph_c0 | 2.08421284    | 1.25177992    | 1.60697761    | 7.42443619     | 9.89941658     | 9.22592609     | 0.004572  | 1.404197  | up        | PREDICTED: SNF2 domain-containing protein CLASSY 3-like [Sesamum indicum]        |
| c13899.graph_c0 | 1.02487953    | 0.92331521    | 0.92190754    | 0.04720929     | 0.10002504     | 0.08401309     | 2.542E-13 | -4.661973 | down      | -                                                                                |
| c13905.graph_c0 | 33.5266557    | 27.6762916    | 27.9760259    | 28.6807319     | 17.2103802     | 8.9230569      | 3.567E-09 | -1.702674 | down      | PREDICTED: monolimonol glutaredoxin-S4-like [Sesamum indicum]                    |
| c13919.graph_c0 | 18.3674562    | 18.7499246    | 16.8258357    | 17.0888363     | 15.4412631     | 19.9759104     | 0.0009064 | -1.055537 | down      | -                                                                                |
| c13925.graph_c0 | 0             | 0             | 0             | 7.1480873      | 9.73611224     | 8.17756084     | 1.095E-12 | Inf       | up        | PREDICTED: homeobox-leucine zipper protein HOX21-like [Sesamum indicum]          |
| c13954.graph_c0 | 30.8512077    | 29.2567268    | 34.4285729    | 3.3657803      | 2.77327253     | 1.33104492     | 5.178E-23 | -4.67144  | down      | flavin-containing monooxygenase family protein FMO1 [Gossypium hirsutum]         |
| c14030.graph_c0 | 0.41170484    | 0.13737237    | 0.08817617    | 23.7055848     | 26.1846888     | 32.2302366     | 1.821E-48 | 6.000527  | up        | RecName: Full=Galactinol synthase 1; Short=ArGolS1; Short=GolS-1 [Ajuga reptans] |
| c14063.graph_c0 | 0.68622231    | 0.68690946    | 1.17576379    | 10.1853277     | 11.7575097     | 12.750483      | 1.215E-10 | 2.73971   | up        | PREDICTED: zinc finger protein ZAT5 [Sesamum indicum]                            |
| c14105.graph_c0 | 45.1982713    | 46.7141615    | 44.7550132    | 27.2289516     | 36.605454      | 28.3370262     | 6.444E-22 | -1.589295 | down      | PREDICTED: protein EAOKDIUM-like 2 [Sesamum indicum]                             |
| c14220.graph_c0 | 75.8344644    | 85.6198711    | 65.9489167    | 25.833305      | 36.8339144     | 39.9007809     | 1.14E-29  | -2.171114 | down      | PREDICTED: transcription factor GLE1-like [Sesamum indicum]                      |
| c14260.graph_c0 | 44.0279329    | 43.5981275    | 43.8020415    | 1.85361253     | 1.84816726     | 2.61952933     | 2.59E-101 | -5.398096 | down      | -                                                                                |
| c14261.graph_c0 | 0.13025651    | 0             | 0             | 7.92005234     | 6.35631447     | 7.47431888     | 1.372E-12 | 6.39044   | up        | PREDICTED: probable mitochondrial chaperone BCS1-B [Sesamum indicum]             |
| c14340.graph_c0 | 3.26653414    | 3.38255698    | 4.92135426    | 26.4614758     | 27.3731315     | 23.6375964     | 7.855E-08 | 1.721691  | up        | -                                                                                |
| c14379.graph_c0 | 0             | 0             | 0             | 7.44390076     | 28.5105986     | 29.0416672     | 5.968E-06 | Inf       | up        | -                                                                                |
| c14382.graph_c0 | 61.137143     | 69.9492103    | 62.8952639    | 70.5766074     | 29.3007213     | 19.5656426     | 3.598E-07 | -1.694932 | down      | PREDICTED: protein SHORT INTERNODES [Sesamum indicum]                            |
| c14444.graph_c0 | 1.00984902    | 0.44927122    | 1.00931909    | 5.2719198      | 6.89906796     | 7.45028874     | 0.0001437 | 1.965207  | up        | hypothetical protein PHAVU_001G014100g [Pnaseoius vulgare]                       |
| c14524.graph_c0 | 2.37243356    | 1.65684362    | 1.91428182    | 0              | 0              | 0.0452272      | 8.392E-22 | -8.077752 | down      | hypothetical protein MIMGU_mgv1a007850mg [Erythranthe guttata]                   |
| c14644.graph_c0 | 0.63711619    | 0.3826525     | 0.81871952    | 32.1650237     | 53.3509135     | 58.9117445     | 1.077E-19 | 5.26396   | up        | -                                                                                |
| c14708.graph_c0 | 0             | 0             | 0             | 1.19283538     | 1.6038818      | 1.02055553     | 2.134E-11 | Inf       | up        | PREDICTED: nyoscyamine o-dioxygenase [Sesamum indicum]                           |
| c14733.graph_c0 | 3.18141577    | 3.89229069    | 3.90654543    | 23.1217631     | 31.1186243     | 32.8598153     | 1.195E-14 | 1.963118  | up        | PREDICTED: fasciclin-like arabinogalactan protein 17 [Sesamum indicum]           |
| c14818.graph_c0 | 0             | 0.21331062    | 0.54767676    | 8.24540089     | 7.69512119     | 9.95696103     | 4.197E-09 | 4.050388  | up        | enolase [Solanum lycopersicum]                                                   |
| c14888.graph_c0 | 0             | 0             | 0             | 13.4601215     | 20.6760816     | 16.1685925     | 9.465E-13 | Inf       | up        | -                                                                                |
| c14914.graph_c0 | 38.4457824    | 40.0916187    | 43.1551146    | 36.0950156     | 36.4472716     | 32.4179909     | 1.412E-16 | -1.231224 | down      | PREDICTED: uncharacterized protein LOC105172581 [Sesamum indicum]                |

| #ID             | 0 h-1<br>FPKM | 0 h-2<br>FPKM | 0 h-3<br>FPKM | 48 h-1<br>FPKM | 48 h-2<br>FPKM | 48 h-3<br>FPKM | FDR       | log2FC    | regulated | nr_annotation                                                                              |
|-----------------|---------------|---------------|---------------|----------------|----------------|----------------|-----------|-----------|-----------|--------------------------------------------------------------------------------------------|
| c14919.graph_c0 | 65.4938286    | 66.8890088    | 73.0018135    | 1.97672531     | 1.19662901     | 0.83756109     | 6.42E-189 | -6.683442 | down      | hypothetical protein MIMGU_mgv1a025595mg [Erythranthe guttata]                             |
| c14921.graph_c0 | 2.11867605    | 1.749658      | 1.70161412    | 0              | 0.05169404     | 0              | 1.312E-21 | -7.802609 | down      | -                                                                                          |
| c14972.graph_c0 | 0             | 0             | 0             | 2.30379017     | 2.44058634     | 2.04989864     | 1.659E-09 | Inf       | up        | AT3G62290 [Arabidopsis thaliana]                                                           |
| c14990.graph_c0 | 27.6138836    | 31.9065371    | 27.3760719    | 14.7570197     | 15.7385475     | 15.9160089     | 2.071E-30 | -1.922882 | down      | PREDICTED: F-box protein SKIP1 [Sesamum indicum]                                           |
| c15003.graph_c0 | 9.23689238    | 13.4993669    | 10.6827952    | 7.31827986     | 7.75283012     | 4.84596198     | 1.227E-05 | -1.761886 | down      | -                                                                                          |
| c15064.graph_c0 | 1.35092647    | 2.52015672    | 1.14417786    | 10.5504879     | 7.97070257     | 8.38103032     | 0.0001043 | 1.415206  | up        | cytochrome P450 CYP81B61 [Salvia miltiorrhiza]                                             |
| c15079.graph_c0 | 16.6348809    | 19.5981067    | 20.0569447    | 7.75716825     | 9.68762584     | 8.97857777     | 4.931E-22 | -2.113489 | down      | PREDICTED: plasma membrane ATPase 1-like [Sesamum indicum]                                 |
| c15088.graph_c0 | 35.864785     | 35.6411751    | 38.2027904    | 17.5156998     | 8.01271459     | 9.13869094     | 7.155E-45 | -2.665054 | down      | PREDICTED: uncharacterized protein LOC105156392 [Sesamum indicum]                          |
| c15089.graph_c0 | 17.7664581    | 18.5101362    | 11.6482663    | 3.8413802      | 5.13107911     | 3.12081639     | 7.944E-15 | -3.001948 | down      | hypothetical protein MIMGU_mgv1a022353mg [Erythranthe guttata]                             |
| c15108.graph_c0 | 8.36182602    | 9.02668533    | 13.0628864    | 6.79717018     | 8.96096769     | 10.4833407     | 0.0027357 | -1.243038 | down      | PREDICTED: elongation of fatty acids protein 3-like [Sesamum indicum]                      |
| c15121.graph_c0 | 4.43412995    | 1.47952335    | 1.50364747    | 0              | 0              | 0              | 5.045E-06 | -Inf      | down      | PREDICTED: oxygen-evolving enhancer protein 1, chloroplastic [Elaeis guineensis]           |
| c15133.graph_c0 | 0.68325502    | 0.78916061    | 1.41832344    | 4.64831327     | 5.74504499     | 5.98864299     | 0.000377  | 1.473046  | up        | PREDICTED: uncharacterized protein LOC105171932 [Sesamum indicum]                          |
| c15145.graph_c0 | 1.4974279     | 1.32691929    | 1.45107689    | 0.04523043     | 0.02395808     | 0              | 1.414E-26 | -6.941185 | down      | PREDICTED: cucumisin-like [Sesamum indicum]                                                |
| c15147.graph_c0 | 2.4447761     | 1.34094475    | 1.63537116    | 0              | 0              | 0              | 6.726E-20 | -Inf      | down      | UPF0012 hydrolase C20A3.11 [Lupinus albus] F10057101                                       |
| c15152.graph_c0 | 0.14374472    | 0             | 0             | 8.47532901     | 10.6620678     | 11.5476107     | 2.422E-14 | 6.736946  | up        | cytochrome P450 98A3 [Sesamum indicum]                                                     |
| c15155.graph_c1 | 13.4805697    | 13.4940685    | 9.19619544    | 9.27605428     | 5.84738463     | 7.02594268     | 4.654E-09 | -1.713328 | down      | -                                                                                          |
| c15159.graph_c0 | 0             | 0             | 0             | 14.1500394     | 18.6211077     | 16.2937435     | 7.012E-46 | Inf       | up        | PREDICTED: probable xyloglucan endotransglucosylase/hydrolase protein 23 [Sesamum indicum] |
| c15161.graph_c0 | 2.07852285    | 2.68465055    | 2.0678587     | 10.2538244     | 11.1898729     | 10.4978563     | 0.0010528 | 1.207728  | up        | PREDICTED: transmembrane protein 184A-like [Sesamum indicum]                               |
| c15169.graph_c0 | 6.98435129    | 7.34091231    | 7.2549274     | 5.3620333      | 6.02124955     | 5.53448178     | 3.797E-06 | -1.3704   | down      | PREDICTED: uncharacterized protein LOC105156896 isoform X1 [Sesamum indicum]               |
| c15170.graph_c0 | 1.59297725    | 1.01472787    | 0.18609444    | 4.93631983     | 12.1548967     | 10.2091476     | 0.0023952 | 2.271582  | up        | hypothetical protein MIMGU_mgv1a006023mg [Erythranthe guttata]                             |
| c15173.graph_c0 | 1.22328875    | 1.34696506    | 0.94318469    | 87.9039241     | 39.756592      | 34.8965402     | 0.0001733 | 4.53536   | up        | BnaC09g03800D [Brassica napus]                                                             |
| c15194.graph_c0 | 48.6295964    | 41.1792034    | 40.8724636    | 4.72224186     | 5.25918842     | 5.17147373     | 5.711E-69 | -4.126446 | down      | -                                                                                          |
| c15220.graph_c0 | 2.54410705    | 1.99737615    | 2.05131187    | 0              | 0              | 0              | 9.782E-26 | -Inf      | down      | malate dehydrogenase [Symphyocladia latiuscula]                                            |
| c15232.graph_c0 | 5.36172628    | 5.07698198    | 5.58651126    | 2.40303501     | 3.96001544     | 3.44488761     | 6.394E-06 | -1.734443 | down      | unnamed protein product [Coffea canephora]                                                 |

| #ID             | 0 h-1<br>FPKM | 0 h-2<br>FPKM | 0 h-3<br>FPKM | 48 h-1<br>FPKM | 48 h-2<br>FPKM | 48 h-3<br>FPKM | FDR       | log2FC    | regulated | nr_annotation                                                                                                      |
|-----------------|---------------|---------------|---------------|----------------|----------------|----------------|-----------|-----------|-----------|--------------------------------------------------------------------------------------------------------------------|
| c15238.graph_c0 | 25.807402     | 24.5196894    | 24.7321265    | 4.77811949     | 5.54972624     | 5.17356314     | 4.981E-59 | -3.295108 | down      | PREDICTED: uncharacterized protein LOC105180187 [Sesamum indicum]                                                  |
| c15272.graph_c0 | 2.5234047     | 2.8146094     | 2.87208352    | 12.0221493     | 12.4545506     | 10.3426316     | 0.0027357 | 1.066713  | up        | hypothetical protein MIMGU_mgv1a014946mg [Erythranthe guttata]                                                     |
| c15278.graph_c0 | 29.8150822    | 27.094252     | 25.9543478    | 8.73393682     | 11.2639703     | 13.6281151     | 9.061E-35 | -2.323459 | down      | hypothetical protein MIMGU_mgv1a025332mg [Erythranthe guttata]                                                     |
| c15296.graph_c0 | 7.67964238    | 3.52336068    | 6.44203183    | 0              | 0              | 0              | 1.422E-15 | -Inf      | down      | unnamed protein product [Chondrus crispus]                                                                         |
| c15303.graph_c0 | 0.7314863     | 1.00680081    | 0.70499164    | 17.9423982     | 18.8293183     | 17.2392429     | 4.763E-16 | 3.450347  | up        | hypothetical protein MIMGU_mgv1a012143mg [Erythranthe guttata]                                                     |
| c15307.graph_c0 | 130.942733    | 103.676379    | 112.1313      | 60.5162168     | 60.5655816     | 55.3130961     | 3.667E-30 | -1.990962 | down      | PREDICTED: zinc finger AZU and AN1 domain-containing stress-associated protein 8-like isoform X2 [Sesamum indicum] |
| c15329.graph_c0 | 0.5199872     | 0.20820316    | 0             | 153.390571     | 181.377386     | 207.840653     | 3.78E-108 | 8.538375  | up        | PREDICTED: dof zinc finger protein DOF3.1-like isoform X1 [Sesamum indicum]                                        |
| c15339.graph_c0 | 252.184041    | 235.786193    | 251.24662     | 73.633424      | 67.687472      | 92.673544      | 3.89E-74  | -2.678161 | down      | hypothetical protein ZEAMMB73_313798 [Zea mays]                                                                    |
| c15356.graph_c0 | 0.08034583    | 0.08042628    | 0.10324757    | 10.5848335     | 7.37101171     | 5.46657803     | 5.125E-09 | 5.460695  | up        | PREDICTED: putative late blight resistance protein homolog R1B-19 isoform X1 [Sesamum indicum]                     |
| c15361.graph_c0 | 1.23328096    | 1.23451591    | 1.30514166    | 20.6517217     | 21.1699693     | 19.5651485     | 1.784E-18 | 3.006252  | up        | hypothetical protein MIMGU_mgv1a014572mg [Erythranthe guttata]                                                     |
| c15363.graph_c0 | 0.38282205    | 0             | 0.24597075    | 22.3952209     | 29.5161678     | 26.2033952     | 5.561E-20 | 5.935175  | up        | PREDICTED: GTP-binding protein SAR1A-like [Elaeis guineensis]                                                      |
| c15363.graph_c1 | 1.43603069    | 0.47915622    | 0.92267815    | 36.6020354     | 40.1769395     | 46.6942681     | 5.988E-19 | 4.424925  | up        | PREDICTED: GTP-binding protein SAR1A-like [Sesamum indicum]                                                        |
| c15364.graph_c0 | 8.7109368     | 6.78195738    | 7.01032038    | 37.5314495     | 36.4538411     | 41.1850807     | 1.79E-14  | 1.339222  | up        | hypothetical protein MIMGU_mgv1a008393mg [Erythranthe guttata]                                                     |
| c15371.graph_c0 | 33.9535964    | 34.6334408    | 21.0903899    | 1.11449885     | 0.94454111     | 0.95861856     | 9.306E-30 | -5.90269  | down      | PREDICTED: protein notum homolog isoform X1 [Sesamum indicum]                                                      |
| c15378.graph_c0 | 15.3244002    | 15.0760247    | 16.5326391    | 2.58894432     | 3.94259183     | 3.41944645     | 2.335E-52 | -3.262723 | down      | PREDICTED: uncharacterized protein LOC105156846 [Sesamum indicum]                                                  |
| c15380.graph_c0 | 22.647299     | 23.528688     | 24.8034169    | 18.3351788     | 22.7728467     | 17.6506357     | 1.57E-10  | -1.293233 | down      | PREDICTED: uncharacterized protein LOC105168435 [Sesamum indicum]                                                  |
| c15395.graph_c0 | 4.04650337    | 1.53641754    | 2.779266      | 0              | 0              | 0              | 8.566E-11 | -Inf      | down      | --                                                                                                                 |
| c15396.graph_c0 | 5.76206104    | 4.45696022    | 8.41417792    | 1.93032235     | 4.60112055     | 4.0792744      | 0.0013027 | -1.848811 | down      | hypothetical protein M569_04751, partial [Genlisea aurea]                                                          |
| c15399.graph_c0 | 3.69184075    | 4.83262605    | 4.92662928    | 0              | 0              | 0              | 1.116E-21 | -Inf      | down      | -                                                                                                                  |
| c15416.graph_c0 | 3.14448248    | 1.41643404    | 1.91937263    | 0              | 0              | 0              | 2.26E-11  | -Inf      | down      | predicted protein [Physcomitrella patens]                                                                          |
| c15446.graph_c0 | 4.90674413    | 3.91113467    | 2.80238243    | 21.4301048     | 25.1856941     | 30.3902281     | 1.416E-08 | 1.711446  | up        | PREDICTED: OFP0529 protein ECU05_1680/ECU11_0050-like isoform X2 [Sesamum indicum]                                 |
| c15446.graph_c1 | 0.46345301    | 1.15979273    | 2.08444416    | 9.17970764     | 16.5095224     | 14.0566419     | 7.065E-06 | 2.38337   | up        | -                                                                                                                  |

| #ID             | 0 h-1<br>FPKM | 0 h-2<br>FPKM | 0 h-3<br>FPKM | 48 h-1<br>FPKM | 48 h-2<br>FPKM | 48 h-3<br>FPKM | FDR       | log2FC    | regulated | nr_annotation                                                                                     |
|-----------------|---------------|---------------|---------------|----------------|----------------|----------------|-----------|-----------|-----------|---------------------------------------------------------------------------------------------------|
| c15451.graph_c0 | 2.29466803    | 1.62468312    | 2.22953457    | 0.05156092     | 0              | 0.0917572      | 7.856E-20 | -6.435344 | down      | -                                                                                                 |
| c15452.graph_c0 | 0.58381897    | 0.19480119    | 0             | 11.4741784     | 13.4850086     | 10.6882325     | 1.346E-10 | 4.516759  | up        | -                                                                                                 |
| c15476.graph_c0 | 1.60801872    | 1.463299      | 1.7845903     | 0.13467379     | 0              | 0.1797479      | 4.094E-14 | -4.956344 | down      | -                                                                                                 |
| c15485.graph_c0 | 1.7698855     | 0.61622879    | 0.69220046    | 6.23856474     | 7.96084437     | 8.20039614     | 8.355E-05 | 1.848262  | up        | hypothetical protein MIMGU_mgv1a013787mg [Erythranthe guttata]                                    |
| c15495.graph_c0 | 15.5429054    | 10.3723128    | 16.3114865    | 70.6410819     | 68.5150812     | 65.1918752     | 1.065E-05 | 1.256349  | up        | hypothetical protein M569_09676, partial [Genlisea aurea]                                         |
| c15497.graph_c0 | 3.29711056    | 4.28560976    | 3.66777942    | 1.13340048     | 1.29675641     | 1.65392841     | 5.345E-10 | -2.483746 | down      | -                                                                                                 |
| c15510.graph_c0 | 0.17067871    | 0.85424809    | 0.4386578     | 68.0850753     | 111.939807     | 112.209044     | 9.79E-29  | 6.614711  | up        | -                                                                                                 |
| c15511.graph_c0 | 14.0303924    | 9.36296113    | 11.5745642    | 7.18095144     | 7.26924299     | 6.5315578      | 7.952E-06 | -1.752988 | down      | unnamed protein product [Coffea canephora]                                                        |
| c15515.graph_c0 | 0             | 0             | 0             | 7.92371054     | 15.3596192     | 13.5009        | 3.904E-13 | Inf       | up        | -                                                                                                 |
| c15525.graph_c0 | 13.7003403    | 7.67642305    | 9.63318703    | 0              | 0              | 0              | 1.395E-26 | -Inf      | down      | --                                                                                                |
| c15532.graph_c0 | 1.66372158    | 1.30851879    | 0.45813174    | 6.56883788     | 16.8173108     | 14.4174507     | 0.0008743 | 2.440656  | up        | PREDICTED: laccase-14-like [Sesamum indicum]                                                      |
| c15553.graph_c0 | 8.10423045    | 4.5333696     | 5.20712849    | 0              | 0              | 0              | 4.263E-16 | -Inf      | down      | hypothetical protein OIADMADRAFT_111959 [Oidiodendron maius Zn]                                   |
| c15566.graph_c0 | 0             | 0             | 0             | 2.16661976     | 4.26264599     | 4.77371201     | 3.28E-08  | Inf       | up        | PREDICTED: polygalacturonase At1g48100 [Sesamum indicum]                                          |
| c15569.graph_c0 | 0             | 0             | 0             | 20.1125354     | 19.7749316     | 18.8317523     | 1.368E-23 | Inf       | up        | PREDICTED: CDGSH iron-sulfur domain-containing protein NEET [Sesamum indicum]                     |
| c15575.graph_c0 | 0             | 0             | 0.09336734    | 5.15411214     | 6.73655715     | 8.10012113     | 9.493E-17 | 6.686148  | up        | PREDICTED: probable LRR receptor-like serine/threonine-protein kinase At4g30520 [Sesamum indicum] |
| c15576.graph_c0 | 13.9419651    | 13.4223169    | 13.0681245    | 9.67096291     | 13.6469433     | 13.2438862     | 2.97E-10  | -1.168116 | down      | PREDICTED: uncharacterized protein LOC105180173 [Sesamum indicum]                                 |
| c15577.graph_c0 | 0.19460632    | 0.58440357    | 1.00030732    | 29.0440141     | 28.8693141     | 32.5432751     | 9.946E-19 | 4.637335  | up        | PREDICTED: uncharacterized protein LOC103494735 isoform X1 [Cucumis melo]                         |
| c15590.graph_c1 | 4.87900989    | 7.32584322    | 5.82188367    | 0              | 0              | 0              | 9.987E-23 | -Inf      | down      | PREDICTED: cirhin-like [Phoenix dactylifera]                                                      |
| c15600.graph_c0 | 0             | 0             | 0.23012385    | 1.53980802     | 1.39820562     | 1.17438164     | 2.482E-07 | 3.11292   | up        | PREDICTED: transcription factor KAZZ-like [Sesamum indicum]                                       |
| c15640.graph_c0 | 2.48649798    | 1.42227876    | 1.27809934    | 0              | 0              | 0              | 1.521E-12 | -Inf      | down      | -                                                                                                 |
| c15678.graph_c0 | 3.42647893    | 3.0215874     | 4.08864957    | 16.3847548     | 22.1349988     | 18.4578878     | 4.875E-06 | 1.410671  | up        | PREDICTED: uncharacterized protein LOC105165199 [Sesamum indicum]                                 |
| c15749.graph_c0 | 26.6632874    | 22.8771314    | 15.9895773    | 16.6099155     | 10.1611809     | 13.1141181     | 8.231E-07 | -1.721371 | down      | hypothetical protein MIMGU_mgv1a004686mg [Erythranthe guttata]                                    |
| c15817.graph_c0 | 14.6969744    | 6.85593374    | 8.61797199    | 0              | 0              | 0              | 1.458E-14 | -Inf      | down      | hypothetical protein MIMGU_mgv1a016137mg [Erythranthe guttata]                                    |
| c15849.graph_c0 | 86.3734634    | 79.198225     | 88.2702782    | 48.45382       | 45.3570868     | 52.6844641     | 8.809E-31 | -1.810998 | down      | -                                                                                                 |
| c15949.graph_c0 | 28.760182     | 28.9074541    | 23.7261058    | 18.3180532     | 28.3000611     | 23.9638424     | 8.689E-09 | -1.227799 | down      | hypothetical protein MIMGU_mgv1a025131mg [Erythranthe guttata]                                    |

| #ID             | 0 h-1<br>FPKM | 0 h-2<br>FPKM | 0 h-3<br>FPKM | 48 h-1<br>FPKM | 48 h-2<br>FPKM | 48 h-3<br>FPKM | FDR       | log2FC    | regulated | nr_annotation                                                                                                     |
|-----------------|---------------|---------------|---------------|----------------|----------------|----------------|-----------|-----------|-----------|-------------------------------------------------------------------------------------------------------------------|
| c15957.graph_c0 | 0.10804568    | 0             | 0.13884298    | 5.17601404     | 5.58880847     | 8.59118958     | 1.174E-11 | 5.261343  | up        | -                                                                                                                 |
| c15959.graph_c0 | 0             | 0             | 0             | 5.62942075     | 5.26207825     | 7.16978049     | 2.742E-13 | Inf       | up        | V-type proton ATPase catalytic subunit A [ <i>Gossypium arboreum</i> ]                                            |
| c15999.graph_c0 | 12.694969     | 11.1579639    | 11.3398982    | 4.70669883     | 3.62631033     | 3.9341746      | 2.206E-10 | -2.532602 | down      | hypothetical protein EUTSA_v10020227mg [ <i>Eutrema salsugineum</i> ]                                             |
| c16031.graph_c0 | 8.24115128    | 9.03506103    | 9.88419196    | 6.57998128     | 6.05148013     | 4.11768107     | 6.303E-08 | -1.711956 | down      | PREDICTED: uncharacterized protein LOC105156318 [ <i>Sesamum indicum</i> ]                                        |
| c16059.graph_c0 | 0.3694757     | 0.18492283    | 0.23739545    | 9.70097562     | 3.96656425     | 4.69452567     | 0.0031131 | 3.537958  | up        | hypothetical protein L484_026688 [ <i>Morus notabilis</i> ]                                                       |
| c16072.graph_c0 | 10.3328465    | 9.14398248    | 9.04451438    | 6.13925365     | 6.64994751     | 6.62885916     | 1.172E-07 | -1.572567 | down      | hypothetical protein MIMGU_mgv1a016741mg [ <i>Erythranthe guttata</i> ]                                           |
| c16076.graph_c0 | 16.9084791    | 16.2891168    | 15.0299398    | 4.56774857     | 3.47413643     | 1.87585625     | 1.036E-21 | -3.287924 | down      | PREDICTED: dof zinc finger protein DOF3.1-like [ <i>Solanum lycopersicum</i> ]                                    |
| c16083.graph_c0 | 9.01720259    | 10.7025322    | 5.62819599    | 70.8488485     | 85.9935388     | 102.428229     | 7.339E-17 | 2.337389  | up        | PREDICTED: phosphoglycerate kinase, chloroplastic-like [ <i>Fragaria vesca</i> subsp. <i>vesca</i> ]              |
| c16084.graph_c0 | 0             | 0             | 0             | 15.6727532     | 13.3478166     | 12.1681512     | 6.29E-17  | Inf       | up        | acetyljalman acetylesterase [ <i>Striga asiatica</i> ]                                                            |
| c16100.graph_c0 | 44.676479     | 46.7279369    | 38.8260588    | 14.3792264     | 10.2019487     | 10.9164502     | 1.94E-39  | -2.884661 | down      | hypothetical protein M569_09334 [ <i>Genlisea aurea</i> ]                                                         |
| c16107.graph_c0 | 3.23517637    | 3.65627602    | 5.90072605    | 41.9186642     | 48.5836992     | 64.9310144     | 7.609E-13 | 2.574159  | up        | Fructose-bisphosphate aldolase, chloroplast precursor, putative, expressed [ <i>Oryza sativa Japonica Group</i> ] |
| c16116.graph_c0 | 1.48219569    | 1.48367989    | 1.90468014    | 34.9776885     | 35.6636805     | 37.0110601     | 1.372E-45 | 3.445236  | up        | PREDICTED: transcription repressor OFP6-like [ <i>Sesamum indicum</i> ]                                           |
| c16134.graph_c0 | 0             | 0             | 0             | 3.22666945     | 4.10191803     | 6.07026455     | 1.418E-10 | Inf       | up        | PREDICTED: uncharacterized protein LOC104223573 [ <i>Nicotiana glauca</i> ]                                       |
| c16163.graph_c0 | 14.1685582    | 17.6940082    | 16.9697786    | 6.84332039     | 10.3374898     | 10.9942902     | 2.674E-15 | -1.819653 | down      | PREDICTED: xyloglucan galactosyltransferase KATAMARI1 homolog [ <i>Sesamum indicum</i> ]                          |
| c16187.graph_c0 | 3.87316065    | 3.55395245    | 2.40562964    | 13.7970718     | 16.6323693     | 21.0606358     | 4.731E-06 | 1.370522  | up        | PREDICTED: uncharacterized protein LOC105171815 [ <i>Sesamum indicum</i> ]                                        |
| c16197.graph_c0 | 2.44574674    | 3.26426105    | 2.91007537    | 0.66760931     | 0.53043833     | 0.59403475     | 5.215E-10 | -3.280514 | down      | -                                                                                                                 |
| c16231.graph_c0 | 27.5459711    | 15.1503045    | 15.9483978    | 0              | 0              | 0              | 8.104E-18 | -Inf      | down      | -                                                                                                                 |
| c16250.graph_c0 | 138.859848    | 149.508724    | 147.58971     | 81.5687845     | 77.16494       | 65.0223383     | 4.531E-44 | -1.977642 | down      | hypothetical protein MIMGU_mgv1a014113mg [ <i>Erythranthe guttata</i> ]                                           |
| c16273.graph_c0 | 5.76379997    | 7.89881818    | 7.23036089    | 64.8577164     | 68.6419184     | 67.5533306     | 2.692E-35 | 2.24699   | up        | 40S ribosomal protein S9-2 [ <i>Morus notabilis</i> ]                                                             |
| c16349.graph_c0 | 0.02097108    | 0.10496039    | 0.02694867    | 0.46367823     | 0.81868476     | 0.94549147     | 3.532E-05 | 2.842253  | up        | PREDICTED: uncharacterized protein At4g38062-like [ <i>Sesamum indicum</i> ]                                      |
| c16382.graph_c0 | 11.9521371    | 9.62192599    | 9.91425535    | 4.4277392      | 5.24612483     | 4.87288048     | 1.108E-14 | -2.132953 | down      | PREDICTED: peroxidase 9 [ <i>Sesamum indicum</i> ]                                                                |
| c16384.graph_c0 | 1.79710656    | 1.19927073    | 1.15467654    | 0              | 0              | 0              | 4.146E-25 | -Inf      | down      | PREDICTED: L-lactate dehydrogenase A-like [ <i>Solanum tuberosum</i> ]                                            |

| #ID             | 0 h-1<br>FPKM | 0 h-2<br>FPKM | 0 h-3<br>FPKM | 48 h-1<br>FPKM | 48 h-2<br>FPKM | 48 h-3<br>FPKM | FDR       | log2FC    | regulated | nr_annotation                                                                               |
|-----------------|---------------|---------------|---------------|----------------|----------------|----------------|-----------|-----------|-----------|---------------------------------------------------------------------------------------------|
| c16509.graph_c0 | 11.8766476    | 13.4251543    | 14.3275565    | 73.3157773     | 68.2857934     | 64.7723322     | 4.733E-15 | 1.363447  | up        | Peptidylprolyl cis/trans isomerase [Theobroma cacao]                                        |
| c16681.graph_c0 | 0.78693784    | 1.05030112    | 1.10755545    | 0              | 0              | 0              | 4.44E-20  | -Inf      | down      | --                                                                                          |
| c16725.graph_c0 | 31.6667139    | 33.0968832    | 32.7139652    | 2.57412726     | 0.75749325     | 0.89072782     | 1.557E-61 | -5.52244  | down      | -                                                                                           |
| c16744.graph_c0 | 1.77680778    | 1.7172564     | 2.83440209    | 10.9503716     | 10.5242474     | 12.1041316     | 3.833E-05 | 1.38427   | up        | PREDICTED: uncharacterized protein LOC105171253 isoform X1 [Sesamum indicum]                |
| c16837.graph_c0 | 0.26345674    | 0.5274411     | 0.50782851    | 5.09698412     | 12.4705894     | 10.798252      | 1.23E-05  | 3.413947  | up        | PREDICTED: uncharacterized protein LOC105156659 [Sesamum indicum]                           |
| c16854.graph_c0 | 1.70989262    | 1.53605561    | 1.29583163    | 0              | 0              | 0.03594003     | 1.537E-21 | -8.019862 | down      | -                                                                                           |
| c16937.graph_c0 | 0.68840394    | 0.92762556    | 0.61243361    | 0.02439241     | 0.12920399     | 0.17363375     | 1.138E-11 | -3.804688 | down      | PREDICTED: subtilisin-like protease [Sesamum indicum]                                       |
| c16945.graph_c0 | 1.10561168    | 0.40437802    | 0.87431064    | 0              | 0              | 0              | 1.9E-10   | -Inf      | down      | polyunsaturated fatty acids delta-5-elongase [Thraustochytrium sp. FJN-10]                  |
| c17004.graph_c0 | 1.26627964    | 0.89954993    | 1.20729186    | 0              | 0              | 0              | 1.539E-20 | -Inf      | down      | PREDICTED: prostaglandin reductase 1-like [Pyrus x bretschneideri]                          |
| c17007.graph_c0 | 18.7777388    | 13.4261013    | 10.7245057    | 6.86479276     | 4.36344932     | 5.86392126     | 1.45E-07  | -2.33484  | down      | -                                                                                           |
| c17172.graph_c0 | 2.10291095    | 1.26301002    | 0             | 9.2992259      | 8.20950188     | 10.3429941     | 0.0004368 | 2.049466  | up        | PREDICTED: uncharacterized protein LOC105167003 isoform X1 [Sesamum indicum]                |
| c17223.graph_c0 | 2.33728246    | 2.67385474    | 3.8616435     | 17.2260564     | 22.485274      | 22.1703385     | 0.0003783 | 1.77462   | up        | -                                                                                           |
| c17322.graph_c0 | 0.068869      | 0.03446898    | 0.06637455    | 0.41240301     | 0.52090848     | 0.84681628     | 0.0003866 | 2.363692  | up        | PREDICTED: uncharacterized protein LOC105167219 [Sesamum indicum]                           |
| c17325.graph_c0 | 1.40953713    | 0.68826759    | 1.19281457    | 0              | 0              | 0              | 5.796E-15 | -Inf      | down      | unnamed protein product [Chondrus crispus]                                                  |
| c17409.graph_c0 | 0.3694757     | 0.18492283    | 0.71218634    | 10.3817458     | 9.01491874     | 8.9347424      | 2.461E-08 | 3.458311  | up        | -                                                                                           |
| c17428.graph_c0 | 0.60200763    | 1.08469881    | 0.81228382    | 0              | 0.05875407     | 0.04934875     | 1.965E-14 | -5.578713 | down      | gag-pol polymerase [Arabidopsis lyrata subsp. lyrata]                                       |
| c17559.graph_c0 | 0             | 0             | 0             | 50.125956      | 129.832864     | 158.152163     | 1.176E-11 | Inf       | up        | PREDICTED: 3'-hydroxy-N-methyl-(S)-coclaurine 4'-O-methyltransferase-like [Sesamum indicum] |
| c17663.graph_c0 | 1.29924554    | 0.43351551    | 0.55652732    | 21.9440785     | 24.5151134     | 29.8210829     | 9.348E-10 | 4.043589  | up        | -                                                                                           |
| c17703.graph_c0 | 8.90752367    | 6.17292222    | 4.40250792    | 1.44284691     | 1.71958652     | 1.76527519     | 3.175E-07 | -2.998165 | down      | -                                                                                           |
| c17748.graph_c0 | 11.2922392    | 11.5971453    | 13.9456118    | 6.48507884     | 7.44266756     | 6.97254752     | 8.037E-07 | -1.839377 | down      | PREDICTED: ABC transporter B family member 20 [Nelumbo nucifera]                            |
| c17782.graph_c0 | 1.51149176    | 1.56181191    | 1.56639255    | 0              | 0              | 0              | 7.646E-22 | -Inf      | down      | --                                                                                          |
| c17811.graph_c0 | 0.19867237    | 0.19887131    | 0             | 33.1894296     | 24.4311519     | 17.0459026     | 2.486E-13 | 6.561382  | up        | PREDICTED: uncharacterized protein LOC105158387 [Sesamum indicum]                           |
| c17816.graph_c0 | 0             | 0             | 0             | 23.7811487     | 24.1435249     | 21.4542165     | 7.682E-15 | Inf       | up        | PREDICTED: L-ascorbate oxidase homolog [Cucumis melo]                                       |
| c17821.graph_c0 | 1.76219832    | 0.5039894     | 0.97049769    | 20.4091113     | 20.392514      | 21.6680679     | 4.556E-09 | 3.256193  | up        | -                                                                                           |
| c17845.graph_c0 | 0.10381222    | 0.20783235    | 0             | 85.0227055     | 89.9699295     | 106.798795     | 6.99E-117 | 8.815572  | up        | hypothetical protein MIMGU_mgv1a009966mg [Erythranthe guttata]                              |

| #ID             | 0 h-1<br>FPKM | 0 h-2<br>FPKM | 0 h-3<br>FPKM | 48 h-1<br>FPKM | 48 h-2<br>FPKM | 48 h-3<br>FPKM | FDR       | log2FC    | regulated | nr_annotation                                                                                |
|-----------------|---------------|---------------|---------------|----------------|----------------|----------------|-----------|-----------|-----------|----------------------------------------------------------------------------------------------|
| c17960.graph_c0 | 76.7099437    | 74.2008113    | 73.5080526    | 40.896434      | 45.1771801     | 41.9212814     | 3.508E-37 | -1.828539 | down      | PREDICTED: probable ADP-ribosylation factor GTPase-activating protein AGD6 [Sesamum indicum] |
| c18032.graph_c0 | 1.21310507    | 1.05241051    | 0.88336989    | 0              | 0              | 0              | 2.075E-20 | -Inf      | down      | hypothetical protein GUTHDRAFT_137181 [Guillardia theta CCMP2712]                            |
| c18118.graph_c0 | 63.8274276    | 66.1772567    | 60.4518029    | 34.2923945     | 36.5515089     | 32.6659359     | 2.387E-30 | -1.896779 | down      | PREDICTED: E3 ubiquitin-protein ligase ATL42 [Sesamum indicum]                               |
| c18221.graph_c0 | 1.93596322    | 0.81448046    | 1.04559264    | 0              | 0              | 0              | 9.471E-11 | -Inf      | down      | hypothetical protein P1A1VU_001G205900 [Pantoea dispersa]                                    |
| c18282.graph_c0 | 5.85528607    | 5.86114926    | 6.84024948    | 0.32692554     | 0.69267594     | 0.43634457     | 2.217E-15 | -4.701623 | down      | -                                                                                            |
| c18297.graph_c0 | 0.36526185    | 0.7312552     | 0             | 14.4696307     | 12.4769458     | 13.7732455     | 1.014E-08 | 4.214313  | up        | PFA: putative methionine synthase family protein [Zea mays]                                  |
| c18320.graph_c0 | 2.09189538    | 0.87249587    | 1.45609121    | 0              | 0              | 0              | 1.091E-11 | -Inf      | down      | predicted protein [Physcomitrella patens]                                                    |
| c18333.graph_c0 | 7.39263791    | 6.66003646    | 6.3332216     | 0.45403868     | 2.40499464     | 1.01000222     | 2.15E-10  | -3.434765 | down      | -                                                                                            |
| c18333.graph_c1 | 3.97975493    | 5.80962091    | 3.83560699    | 0.45830123     | 0.16183819     | 0.67965613     | 1.395E-13 | -4.401403 | down      | -                                                                                            |
| c18358.graph_c0 | 14.726961     | 13.777297     | 12.5575297    | 61.6240597     | 58.9698212     | 56.0737875     | 1.731E-06 | 1.090476  | up        | PREDICTED: protein P21-like [Sesamum indicum]                                                |
| c18369.graph_c0 | 19.0341702    | 19.3463566    | 25.9648722    | 18.8844051     | 18.7196543     | 15.3629533     | 8.497E-06 | -1.299973 | down      | hypothetical protein MIMGU_mgv1a008825mg [Erythranthe guttata]                               |
| c18381.graph_c0 | 1.52956927    | 2.04146786    | 1.31037138    | 14.7176737     | 15.7574587     | 15.6033844     | 5.853E-06 | 2.222772  | up        | --                                                                                           |
| c18400.graph_c0 | 3.1384297     | 0.39269655    | 2.01650321    | 13.7337992     | 11.8691617     | 9.9691529      | 0.0026383 | 1.668547  | up        | -                                                                                            |
| c18422.graph_c1 | 0.83602348    | 0.74387611    | 0.67642576    | 0              | 0              | 0              | 7.243E-20 | -Inf      | down      | --                                                                                           |
| c18557.graph_c0 | 1.32208413    | 1.10284       | 0.28315507    | 10.7589128     | 12.9031285     | 13.0051235     | 2.773E-06 | 2.749947  | up        | mitochondrial ATP synthase, beta chain [Plantago major]                                      |
| c18610.graph_c0 | 1.10290418    | 1.38001071    | 3.18886995    | 89.667936      | 97.4142056     | 98.545869      | 7.618E-36 | 4.623657  | up        | betaine aldehyde dehydrogenase 1 [Jatropha curcas]                                           |
| c18661.graph_c0 | 0.10146304    | 0             | 0             | 2.80423104     | 5.05026268     | 3.90912773     | 1.008E-10 | 5.852244  | up        | -                                                                                            |
| c18663.graph_c0 | 13.4998478    | 10.5211206    | 12.3913135    | 0.44417644     | 0.09411022     | 0.15809021     | 4.505E-45 | -6.698909 | down      | -                                                                                            |
| c18669.graph_c0 | 311.128593    | 341.87719     | 284.800189    | 29.6535669     | 22.2340459     | 19.7251315     | 1.2E-175  | -4.720281 | down      | PREDICTED: uncharacterized protein LOC105174162 [Sesamum indicum]                            |
| c18679.graph_c0 | 1.28277377    | 1.5106568     | 1.93931187    | 7.71629473     | 11.7830322     | 14.8452165     | 4.113E-05 | 1.828939  | up        | PREDICTED: uncharacterized protein LOC105160400 [Sesamum indicum]                            |
| c18688.graph_c0 | 13.7462915    | 14.5845603    | 13.1484309    | 4.01335194     | 4.87690382     | 5.56664678     | 8.112E-56 | -2.541933 | down      | PREDICTED: topless-related protein 4-like isoform X5 [Sesamum indicum]                       |
| c18696.graph_c0 | 10.3862138    | 11.0746541    | 12.2828289    | 9.15243773     | 12.26678       | 10.4882067     | 3.977E-05 | -1.104135 | down      | BnaC04g40780D [Brassica napus]                                                               |
| c18699.graph_c0 | 18.5435267    | 18.4034449    | 16.2934468    | 7.30064373     | 7.27009798     | 7.66536129     | 1.118E-11 | -2.27601  | down      | -                                                                                            |
| c18700.graph_c0 | 1.55440838    | 1.3729102     | 0.93998885    | 10.19263       | 7.76374735     | 5.54653903     | 0.002216  | 1.598885  | up        | PREDICTED: NADPH--cytochrome P450 reductase-like [Sesamum indicum]                           |
| c18707.graph_c0 | 0.15319321    | 0.30669323    | 0.19685934    | 3.01080704     | 2.89056139     | 4.60452781     | 1.104E-07 | 2.979713  | up        | PREDICTED: protein kinase PVPK-1 [Sesamum indicum]                                           |
| c18710.graph_c0 | 88.4938063    | 51.544474     | 57.3873292    | 0              | 0              | 0              | 3.556E-48 | -Inf      | down      | hypothetical protein CHLNCDKAF1_59590 [Cytospora variable]                                   |

| #ID             | 0 h-1<br>FPKM | 0 h-2<br>FPKM | 0 h-3<br>FPKM | 48 h-1<br>FPKM | 48 h-2<br>FPKM | 48 h-3<br>FPKM | FDR       | log2FC    | regulated | nr_annotation                                                                              |
|-----------------|---------------|---------------|---------------|----------------|----------------|----------------|-----------|-----------|-----------|--------------------------------------------------------------------------------------------|
| c18715.graph_c0 | 0.19385313    | 0.33958268    | 0.24910895    | 5.491647       | 9.64892484     | 14.8976661     | 3.263E-06 | 4.232747  | up        | PREDICTED: homeobox-leucine zipper protein MERISTEM L1-like [Sesamum indicum]              |
| c18726.graph_c0 | 0.21384123    | 0.07135179    | 0.1831963     | 2.52822426     | 3.26967041     | 4.49919748     | 9.371E-10 | 3.432586  | up        | PREDICTED: sulfite reductase 1 [ferredoxin], chloroplastic-like [Sesamum indicum]          |
| c18731.graph_c0 | 1.7378418     | 2.46087208    | 2.2876637     | 11.1289943     | 10.6728897     | 12.5779278     | 1.485E-06 | 1.386664  | up        | PREDICTED: uncharacterized protein LOC104214549 [Nicotiana sylvestris]                     |
| c18732.graph_c0 | 8.95554731    | 8.0307113     | 10.9088457    | 7.21913002     | 5.37166406     | 5.50589013     | 1.609E-06 | -1.638622 | down      | PREDICTED: uncharacterized protein LOC105163289 [Sesamum indicum]                          |
| c18736.graph_c0 | 34.5668746    | 32.7331572    | 33.0030498    | 3.7829142      | 3.13316677     | 3.88621652     | 5.29E-132 | -4.230194 | down      | PREDICTED: calcium/calcium exchanger 3-like [Sesamum indicum]                              |
| c18743.graph_c0 | 0.08565916    | 0             | 0             | 2.13069964     | 1.75561393     | 2.17675539     | 4.519E-10 | 5.151173  | up        | hypothetical protein MIMGU_mgv1a000037mg [Erythranthe guttata]                             |
| c18762.graph_c0 | 0             | 0             | 0             | 1.98792233     | 2.27671639     | 1.81664786     | 1.098E-11 | Inf       | up        | PREDICTED: folate-biopterin transporter 1, chloroplastic-like isoform X1 [Sesamum indicum] |
| c18784.graph_c0 | 16.284431     | 14.8157841    | 16.9835328    | 6.33636672     | 7.04166183     | 7.29631424     | 7.771E-36 | -2.238228 | down      | PREDICTED: probable carboxylesterase 10 [Sesamum indicum]                                  |
| c18793.graph_c0 | 13.2742561    | 8.70948543    | 8.02726808    | 0              | 0              | 0              | 2.774E-27 | -Inf      | down      | Ubiquitin-conjugating enzyme [Pestalotiopsis fici W106-1]                                  |
| c18797.graph_c0 | 0             | 0             | 0             | 17.258833      | 12.6937379     | 11.9333141     | 8.386E-20 | Inf       | up        | -                                                                                          |
| c18808.graph_c0 | 0.32186867    | 0.83769654    | 1.24084197    | 9.42954005     | 12.8166583     | 15.4086895     | 1.191E-12 | 2.937199  | up        | PREDICTED: uncharacterized protein LOC105161274 [Sesamum indicum]                          |
| c18813.graph_c0 | 0             | 0             | 0             | 1.79763317     | 3.26464178     | 5.02707287     | 1.243E-06 | Inf       | up        | PREDICTED: glyoxylate/succinic semialdehyde reductase 1 [Sesamum indicum]                  |
| c18817.graph_c0 | 0.34194817    | 0.59900852    | 0.43941694    | 4.80413066     | 4.25506703     | 4.76522437     | 2.772E-05 | 2.30798   | up        | hypothetical protein MIMGU_mgv1a015124mg [Erythranthe guttata]                             |
| c18818.graph_c0 | 2.9100942     | 2.31636798    | 3.37914422    | 2.55176529     | 2.22422258     | 2.64417946     | 0.0007164 | -1.232576 | down      | hypothetical protein MIMGU_mgv1a001568mg [Erythranthe guttata]                             |
| c18827.graph_c0 | 3.78286749    | 4.13089687    | 2.82829643    | 0.12672816     | 0.53701246     | 0.56380975     | 2.912E-16 | -4.163639 | down      | -                                                                                          |
| c18829.graph_c0 | 0             | 0             | 0             | 5.33011728     | 8.46991942     | 10.8291794     | 5.965E-13 | Inf       | up        | PREDICTED: uncharacterized protein LOC105159002 [Sesamum indicum]                          |
| c18846.graph_c0 | 5.94156695    | 5.54720292    | 6.75417006    | 31.421482      | 34.5696735     | 34.8897673     | 5.188E-13 | 1.446226  | up        | PREDICTED: 50S ribosomal protein L17, chloroplastic-like [Sesamum indicum]                 |
| c18851.graph_c0 | 19.4620607    | 19.3269336    | 18.6578948    | 16.2221274     | 15.1879537     | 17.219928      | 2.642E-14 | -1.257099 | down      | PREDICTED: transmembrane protein 136-like [Sesamum indicum]                                |
| c18858.graph_c0 | 1.9472711     | 1.79533513    | 1.18530969    | 1.46348809     | 1.150288       | 0.84013091     | 0.0007874 | -1.518092 | down      | PREDICTED: cytochrome P450 1A8-like [Sesamum indicum]                                      |
| c18864.graph_c0 | 13.9296556    | 17.5087301    | 13.3234138    | 0.36457123     | 0.15448761     | 0.38927195     | 8.285E-65 | -6.631518 | down      | hypothetical protein MIMGU_mgv1a017080mg [Erythranthe guttata]                             |
| c18867.graph_c0 | 31.4213272    | 21.8243855    | 32.4669263    | 0.23630511     | 0              | 0              | 4.086E-45 | -9.464763 | down      | PREDICTED: uncharacterized protein LOC105160499 [Sesamum indicum]                          |



| #ID             | 0 h-1<br>FPKM | 0 h-2<br>FPKM | 0 h-3<br>FPKM | 48 h-1<br>FPKM | 48 h-2<br>FPKM | 48 h-3<br>FPKM | FDR       | log2FC    | regulated | nr_annotation                                                                            |
|-----------------|---------------|---------------|---------------|----------------|----------------|----------------|-----------|-----------|-----------|------------------------------------------------------------------------------------------|
| c18874.graph_c0 | 0.22724936    | 0.22747691    | 0.33374219    | 2.36274248     | 2.50303916     | 2.1555782      | 2.253E-05 | 2.132781  | up        | hypothetical protein MIMGU_mgv1a002578mg [Erythranthe guttata]                           |
| c18876.graph_c0 | 18.7801891    | 15.5112781    | 18.2893517    | 12.5688282     | 12.8219958     | 13.8760323     | 9.569E-10 | -1.440057 | down      | hypothetical protein MIMGU_mgv1a016811mg [Erythranthe guttata]                           |
| c18878.graph_c0 | 8.90314232    | 9.10579785    | 8.45631027    | 93.9681718     | 98.3200636     | 101.540571     | 7.144E-41 | 2.454916  | up        | 40S ribosomal protein S17-like protein [Solanum tuberosum]                               |
| c18889.graph_c0 | 10.7276735    | 10.4096887    | 12.5194713    | 6.65591989     | 4.48708912     | 4.75586465     | 1.733E-09 | -2.093716 | down      | histone h4, partial [Cysticapnos vesicaria]                                              |
| c18892.graph_c0 | 1.76071547    | 0.88123928    | 0.67877673    | 5.43398788     | 6.4440126      | 7.8661066      | 0.0016932 | 1.557394  | up        | hypothetical protein CICLE_v10000109mg [Citrus clamentinal]                              |
| c18896.graph_c0 | 3.65449095    | 3.76574302    | 4.39229602    | 59.2746999     | 46.9751305     | 39.3672685     | 5.486E-11 | 2.610559  | up        | PREDICTED: L-type lectin-domain containing receptor kinase VIII.1-like [Sesamum indicum] |
| c18903.graph_c0 | 31.8662863    | 27.7924872    | 35.6787195    | 11.5782096     | 13.6513751     | 15.173146      | 1.038E-22 | -2.261682 | down      | PREDICTED: transmembrane ascorbate ferrireductase 1 [Sesamum indicum]                    |
| c18926.graph_c0 | 0.05423749    | 0             | 0             | 1.64891467     | 2.77904002     | 2.71208655     | 3.293E-15 | 6.035368  | up        | PREDICTED: BTB/POZ domain-containing protein At5g66560 [Sesamum indicum]                 |
| c18936.graph_c0 | 2.13649196    | 1.9247682     | 1.83031783    | 0.06560919     | 0              | 0              | 2.217E-19 | -7.447672 | down      | -                                                                                        |
| c18949.graph_c0 | 135.04453     | 137.152955    | 138.637056    | 7.49468851     | 10.0467916     | 11.0547004     | 2.88E-202 | -4.868332 | down      | hypothetical protein MIMGU_mgv1a005690mg [Erythranthe guttata]                           |
| c18950.graph_c0 | 0             | 0             | 0             | 4.66949173     | 5.2294323      | 3.56133057     | 2.06E-11  | Inf       | up        | -                                                                                        |
| c18956.graph_c0 | 0.05843633    | 0.05849484    | 0.075093      | 5.1681944      | 3.70708223     | 4.83814019     | 2.469E-13 | 5.14218   | up        | unnamed protein product [Coffea canephora]                                               |
| c18978.graph_c0 | 5.92669222    | 7.06941769    | 6.88635424    | 5.78700487     | 6.37308425     | 6.86565618     | 6.391E-06 | -1.084269 | down      | hypothetical protein MIMGU_mgv1a018497mg [Erythranthe guttata]                           |
| c18979.graph_c0 | 0             | 0             | 0             | 3.31708491     | 2.48554702     | 3.13149307     | 2.87E-15  | Inf       | up        | PREDICTED: uncharacterized protein LOC105171076 [Sesamum indicum]                        |
| c18981.graph_c0 | 4.91836149    | 4.4801907     | 4.48740536    | 26.6429586     | 29.8570409     | 31.0848637     | 2.339E-15 | 1.637827  | up        | PREDICTED: carboxymethylenebutenolidase homolog [Sesamum indicum]                        |
| c18990.graph_c0 | 2.005296      | 3.19343818    | 1.75696688    | 118.989964     | 209.321417     | 287.219109     | 5.78E-11  | 5.441706  | up        | -                                                                                        |
| c19001.graph_c0 | 0             | 0.139419      | 0             | 3.97771518     | 3.39831202     | 2.39762219     | 4.492E-09 | 5.131502  | up        | V-type proton ATPase subunit B 1 [Aegilops tauschii]                                     |
| c19012.graph_c0 | 11.1347011    | 6.74617284    | 5.91706198    | 0              | 0              | 0              | 2.907E-23 | -Inf      | down      | uncharacterized protein LOC100191807 precursor [Zea mays]                                |
| c19017.graph_c0 | 4.36811215    | 4.83623469    | 3.06174385    | 17.5601011     | 17.3755299     | 19.2598253     | 9.899E-05 | 1.129414  | up        | PREDICTED: ceramide-1-phosphate transfer protein [Sesamum indicum]                       |
| c19019.graph_c0 | 0             | 0             | 0             | 3.90293305     | 7.37352036     | 5.38284986     | 5.083E-14 | Inf       | up        | hypothetical protein CICLE_v10023425mg [Citrus clamentinal]                              |
| c19020.graph_c0 | 51.9644699    | 49.6064734    | 45.3770139    | 49.3517636     | 52.0863958     | 42.2682245     | 2.204E-07 | -1.047828 | down      | -                                                                                        |
| c19029.graph_c0 | 14.7475992    | 15.8835591    | 15.1130212    | 13.4144699     | 13.573331      | 13.2368451     | 2.59E-06  | -1.20293  | down      | -                                                                                        |
| c19035.graph_c0 | 8.95781246    | 8.45439479    | 8.16743051    | 1.8076951      | 2.03992727     | 3.00715121     | 1.473E-26 | -2.921711 | down      | PREDICTED: putative pectinesterase 11 [Sesamum indicum]                                  |
| c19039.graph_c0 | 0.1035807     | 0.10368442    | 0             | 16.3654386     | 11.4738889     | 9.50979188     | 1.559E-14 | 6.501351  | up        | PREDICTED: probable WRKY transcription factor 65 [Sesamum indicum]                       |

| #ID             | 0 h-1<br>FPKM | 0 h-2<br>FPKM | 0 h-3<br>FPKM | 48 h-1<br>FPKM | 48 h-2<br>FPKM | 48 h-3<br>FPKM | FDR       | log2FC    | regulated | nr_annotation                                                                                                                                                                  |
|-----------------|---------------|---------------|---------------|----------------|----------------|----------------|-----------|-----------|-----------|--------------------------------------------------------------------------------------------------------------------------------------------------------------------------------|
| c19040.graph_c0 | 3.43721516    | 3.56808875    | 4.49875308    | 19.967089      | 22.3019758     | 24.3671078     | 5.537E-16 | 1.511094  | up        | PREDICTED: UDP-sulfoquinovose synthase, chloroplastic isoform X2 [Sesamum indicum]                                                                                             |
| c19056.graph_c0 | 0             | 0             | 0             | 0.68407943     | 1.18240396     | 1.31348843     | 8.631E-10 | Inf       | up        | PREDICTED: cytochrome b561 and DOMON domain-containing protein At2g04850 [Sesamum indicum]                                                                                     |
| c19060.graph_c0 | 2.08669996    | 1.56659211    | 2.4580344     | 14.6583314     | 13.7467399     | 11.83126       | 8.232E-06 | 1.700972  | up        | PREDICTED: uncharacterized protein LOC105179584 [Sesamum indicum]                                                                                                              |
| c19065.graph_c0 | 1.63163204    | 0.94226877    | 1.33060554    | 21.7959049     | 20.3952505     | 20.6799305     | 1.036E-39 | 2.993434  | up        | PREDICTED: protein SCARECROW [Sesamum indicum]                                                                                                                                 |
| c19070.graph_c0 | 37.3547876    | 42.2776049    | 44.1428931    | 12.6241089     | 12.824108      | 11.0789815     | 6.387E-27 | -2.778635 | down      | -                                                                                                                                                                              |
| c19074.graph_c0 | 3.32657844    | 2.61635747    | 3.47326282    | 16.9650879     | 22.1177129     | 23.9092184     | 4.48E-15  | 1.717716  | up        | PREDICTED: probable galacturonosyltransferase 9 [Sesamum indicum]                                                                                                              |
| c19087.graph_c0 | 0.33041174    | 0.44099013    | 0.28306144    | 1.82638107     | 2.0423198      | 2.3925126      | 0.0046096 | 1.551903  | up        | unnamed protein product [Coffea canephora]                                                                                                                                     |
| c19088.graph_c0 | 17.2140149    | 13.3450548    | 15.5786141    | 5.16250429     | 5.07584783     | 5.34414783     | 3.856E-35 | -2.583324 | down      | PREDICTED: LOW QUALITY PROTEIN: uncharacterized protein LOC105159096 [Sesamum indicum]                                                                                         |
| c19094.graph_c0 | 0             | 0             | 0             | 30.7190056     | 44.5716362     | 45.6021101     | 4.063E-68 | Inf       | up        | PREDICTED: endoglucanase 5-like [Sesamum indicum]                                                                                                                              |
| c19095.graph_c0 | 0             | 0.12329361    | 0.07913934    | 3.85806474     | 10.0976691     | 8.78414129     | 2.438E-08 | 5.773803  | up        | PREDICTED: probable glutathione S-transferase [Sesamum indicum]                                                                                                                |
| c19099.graph_c0 | 0             | 0             | 0.05852804    | 13.5110159     | 22.759009      | 21.8412487     | 7.976E-31 | 8.896707  | up        | RecName: Full=Caffeic acid 3-O-methyltransferase 2; Short=CAOMT-2; Short=COMT-2; AltName: Full=S-adenosyl-L-methionine:caffeic acid 3-O-methyltransferase 2 [Ocimum basilicum] |
| c19100.graph_c0 | 0.95226465    | 0.32996015    | 0.32945709    | 36.6773997     | 42.3583076     | 44.2543478     | 1.06E-109 | 5.245088  | up        | PREDICTED: protein notum homolog [Sesamum indicum]                                                                                                                             |
| c19110.graph_c0 | 0.0576275     | 0.11537041    | 0.14810723    | 1.96433778     | 2.41843353     | 1.93681334     | 3.083E-07 | 3.271758  | up        | -                                                                                                                                                                              |
| c19118.graph_c0 | 172.324738    | 179.907123    | 170.886095    | 60.3828882     | 43.404046      | 31.8213146     | 5.627E-85 | -2.955599 | down      | hypothetical protein M569_08491 [Genlisea aurea]                                                                                                                               |
| c19122.graph_c0 | 320.795999    | 336.387866    | 305.974354    | 121.457336     | 176.719401     | 180.972651     | 1.321E-44 | -2.030955 | down      | -                                                                                                                                                                              |
| c19130.graph_c0 | 13.0659878    | 12.9776832    | 13.1459029    | 6.99839546     | 9.48985777     | 8.05375505     | 1.513E-08 | -1.697278 | down      | hypothetical protein MIMGU_mgv1a000569mg [Erythranthe guttata]                                                                                                                 |
| c19155.graph_c0 | 0.44680628    | 0.48452483    | 0.33492886    | 5.5569657      | 8.86673609     | 12.2392989     | 5.524E-07 | 3.371821  | up        | PREDICTED: transcription factor bHLH143-like [Sesamum indicum]                                                                                                                 |
| c19159.graph_c0 | 7.48541817    | 7.56461621    | 7.04170326    | 4.45438989     | 5.41798018     | 4.22772196     | 2.762E-12 | -1.66653  | down      | hypothetical protein MIMGU_mgv1a026890mg [Erythranthe guttata]                                                                                                                 |
| c19173.graph_c0 | 0.495028      | 1.02644193    | 0.63613057    | 17.8186062     | 22.1550475     | 26.1446244     | 2.075E-31 | 3.915627  | up        | PREDICTED: protein ECERIFERUM 26-like [Sesamum indicum]                                                                                                                        |
| c19192.graph_c0 | 2.62112622    | 2.68338158    | 1.68412548    | 17.1776707     | 19.360449      | 24.8557679     | 7.112E-13 | 2.117948  | up        | PREDICTED: probable carbohydrate esterase At4g34215 [Sesamum indicum]                                                                                                          |
| c19205.graph_c0 | 6.71660629    | 6.22324941    | 5.42118992    | 27.0523422     | 28.9295522     | 32.8075599     | 2.044E-09 | 1.256079  | up        | PREDICTED: protein MEI2-like 4 [Sesamum indicum]                                                                                                                               |

| #ID             | 0 h-1<br>FPKM | 0 h-2<br>FPKM | 0 h-3<br>FPKM | 48 h-1<br>FPKM | 48 h-2<br>FPKM | 48 h-3<br>FPKM | FDR       | log2FC    | regulated | nr_annotation                                                                       |
|-----------------|---------------|---------------|---------------|----------------|----------------|----------------|-----------|-----------|-----------|-------------------------------------------------------------------------------------|
| c19206.graph_c0 | 0.27214243    | 0.61293361    | 0.21857112    | 16.9859653     | 19.8869885     | 21.973874      | 6.351E-57 | 4.720698  | up        | PREDICTED: lysine histidine transporter-like 8 [Sesamum indicum]                    |
| c19211.graph_c0 | 1.13429498    | 1.33119474    | 1.18116994    | 8.34187518     | 9.65793921     | 10.5166156     | 1.133E-16 | 1.946548  | up        | hypothetical protein MIMGU_mgv1a001561mg [Erythranthe guttata]                      |
| c19213.graph_c0 | 0.20230804    | 0.15188296    | 0.19498038    | 1.49103487     | 3.10977971     | 2.98510619     | 1.492E-05 | 2.757861  | up        | PREDICTED: acyl-CoA--sterol O-acyltransferase 1-like [Sesamum indicum]              |
| c19214.graph_c0 | 0             | 0             | 0             | 8.41697134     | 37.8070646     | 50.6281445     | 1.696E-06 | Inf       | up        | hypothetical protein MIMGU_mgv1a015553mg [Erythranthe guttata]                      |
| c19215.graph_c0 | 0             | 0             | 0.12562666    | 2.07146605     | 3.5779355      | 3.44594155     | 2.643E-12 | 5.118735  | up        | hypothetical protein MIMGU_mgv1a019872mg [Erythranthe guttata]                      |
| c19216.graph_c0 | 0.54448505    | 0.583961      | 0.59972987    | 4.71159936     | 5.0103468      | 6.91817911     | 6.757E-12 | 2.245429  | up        | PREDICTED: DNA replication licensing factor MCM4 [Sesamum indicum]                  |
| c19228.graph_c0 | 9.13013374    | 9.48199904    | 10.4126677    | 0.84112747     | 0.44553628     | 0.70165328     | 2.196E-44 | -4.87783  | down      | PREDICTED: zinc finger CCCH domain-containing protein 48-like [Sesamum indicum]     |
| c19232.graph_c0 | 3.24809785    | 3.40804192    | 2.96701357    | 0.72105051     | 1.22218493     | 0.96237961     | 3.035E-12 | -2.751908 | down      | -                                                                                   |
| c19235.graph_c0 | 1.135951      | 2.84272121    | 2.91948402    | 17.1366365     | 17.5998621     | 16.2956539     | 9.854E-06 | 1.864189  | up        | hypothetical protein MIMGU_mgv1a003115mg [Erythranthe guttata]                      |
| c19248.graph_c0 | 0.07227607    | 0             | 0             | 1.99756302     | 3.10372451     | 3.4955918      | 6.954E-11 | 5.889468  | up        | hypothetical protein MIMGU_mgv1a014302mg [Erythranthe guttata]                      |
| c19281.graph_c0 | 561.128627    | 554.807207    | 558.743233    | 208.585967     | 162.49735      | 128.969063     | 6.04E-70  | -2.754235 | down      | PREDICTED: putative DNA-binding protein ESCAROLA [Sesamum indicum]                  |
| c19282.graph_c0 | 0             | 0             | 0             | 40.8826763     | 62.2648367     | 66.3348204     | 1.14E-47  | Inf       | up        | PREDICTED: cytosolic sulfotransferase 12-like [Sesamum indicum]                     |
| c19289.graph_c0 | 5.41414149    | 6.02623043    | 6.59394062    | 3.16394122     | 5.12630082     | 5.92859766     | 8.95E-07  | -1.371482 | down      | PREDICTED: pentatricopeptide repeat-containing protein At4g37170 [Sesamum indicum]  |
| c19303.graph_c0 | 0.15964309    | 0.15980295    | 0.30772154    | 3.64007226     | 3.62250517     | 4.61299931     | 4.518E-10 | 3.216012  | up        | PREDICTED: aspartic proteinase PCS1 [Sesamum indicum]                               |
| c19305.graph_c0 | 21.3995982    | 22.6834076    | 17.2693773    | 11.8723918     | 11.0965389     | 9.43328131     | 1.266E-24 | -1.9334   | down      | PREDICTED: uncharacterized protein LOC105174914 [Sesamum indicum]                   |
| c19324.graph_c0 | 0.90723732    | 0.45407289    | 0.71245526    | 3.43609213     | 4.57474913     | 4.25558991     | 0.0010113 | 1.542707  | up        | PREDICTED: scarecrow-like protein 8 [Sesamum indicum]                               |
| c19327.graph_c0 | 0             | 0             | 0.14040454    | 3.42237997     | 4.26540776     | 4.03042913     | 1.853E-10 | 5.32945   | up        | predicted protein [Hordeum vulgare subsp. vulgare]                                  |
| c19336.graph_c0 | 101.882514    | 120.656094    | 89.2795173    | 44.9727091     | 34.1624877     | 31.8873495     | 2.818E-26 | -2.499106 | down      | PREDICTED: probable WRKY transcription factor 7 [Sesamum indicum]                   |
| c19349.graph_c0 | 1.00335107    | 1.86523214    | 1.84192263    | 18.4430321     | 24.5742442     | 29.4918993     | 1.787E-15 | 2.916577  | up        | PREDICTED: LRR receptor-like serine/threonine-protein kinase HSL2 [Sesamum indicum] |
| c19358.graph_c0 | 0.16094826    | 0.53703142    | 0.13788326    | 4.79425849     | 4.18881282     | 5.4533185      | 9.371E-09 | 3.099447  | up        | hypothetical protein MIMGU_mgv1a000332mg [Erythranthe guttata]                      |

| #ID             | 0 h-1<br>FPKM | 0 h-2<br>FPKM | 0 h-3<br>FPKM | 48 h-1<br>FPKM | 48 h-2<br>FPKM | 48 h-3<br>FPKM | FDR       | log2FC    | regulated | nr_annotation                                                                                 |
|-----------------|---------------|---------------|---------------|----------------|----------------|----------------|-----------|-----------|-----------|-----------------------------------------------------------------------------------------------|
| c19359.graph_c0 | 9.12976629    | 9.13890837    | 8.6904527     | 79.4366197     | 71.2829362     | 78.4434121     | 1.557E-09 | 2.071996  | up        | V-type proton ATPase 16 kDa proteolipid subunit [Morus notabilis]                             |
| c19362.graph_c0 | 0             | 0.03629732    | 0             | 2.2382025      | 3.92824718     | 4.31004737     | 9.443E-14 | 7.157083  | up        | PREDICTED: lactosylceramide 4-alpha-galactosyltransferase-like [Sesamum indicum]              |
| c19380.graph_c0 | 0             | 0             | 0             | 2.82269119     | 6.32374717     | 9.01710474     | 5.215E-08 | Inf       | up        | PREDICTED: uncharacterized protein LOC105170375 [Sesamum indicum]                             |
| c19383.graph_c0 | 5.93652485    | 2.97123469    | 4.0773923     | 0.18859013     | 0.19978838     | 0.67122547     | 2.996E-10 | -4.641658 | down      | -                                                                                             |
| c19389.graph_c0 | 0.0529669     | 0             | 0             | 5.12363923     | 5.53126258     | 6.16548228     | 2.073E-18 | 7.312507  | up        | PREDICTED: probable receptor-like serine/threonine-protein kinase At4g34500 [Sesamum indicum] |
| c19395.graph_c0 | 1.06117983    | 0.69045759    | 0.81819486    | 7.72326179     | 7.97472369     | 8.43790955     | 6.99E-08  | 2.214388  | up        | PREDICTED: uncharacterized protein LOC105159543 [Sesamum indicum]                             |
| c19405.graph_c0 | 3.36463884    | 2.92387509    | 2.94581358    | 2.82722149     | 2.95901282     | 3.54614973     | 0.0034868 | -1.003532 | down      | hypothetical protein MIMGU_mgv1a004222mg [Erythranthe guttata]                                |
| c19406.graph_c0 | 0.42903521    | 0.3340282     | 0.49006865    | 6.38995942     | 6.16456222     | 7.56145798     | 1.734E-18 | 2.983875  | up        | hypothetical protein MIMGU_mgv1a001005mg [Erythranthe guttata]                                |
| c19428.graph_c0 | 0             | 0.07268507    | 0.09330976    | 1.37135253     | 2.16145573     | 3.89875566     | 8.551E-05 | 4.442088  | up        | PREDICTED: uncharacterized protein LOC105159979 [Sesamum indicum]                             |
| c19429.graph_c0 | 1.14471221    | 1.32815413    | 1.2369777     | 10.5458355     | 9.59779285     | 9.8528021      | 4.688E-14 | 1.999348  | up        | PREDICTED: uncharacterized protein LOC105163794 isoform X2 [Sesamum indicum]                  |
| c19430.graph_c0 | 8.9739926     | 6.41641335    | 7.00153244    | 0              | 0              | 0              | 3.116E-42 | -Inf      | down      | 40S ribosomal protein S6-B [Mucor circinelloides f. circinelloides 1006PhL]                   |
| c19433.graph_c0 | 0.23146885    | 0.1853605     | 0.41642529    | 355.733977     | 399.131383     | 358.652991     | 0         | 9.357341  | up        | PREDICTED: GDSL esterase/lipase At1g71250 [Sesamum indicum]                                   |
| c19445.graph_c0 | 0             | 0             | 0             | 4.69465207     | 5.37940764     | 7.24629021     | 7.118E-14 | Inf       | up        | PREDICTED: T-complex protein 1 subunit epsilon [Nicotiana tomentosiformis]                    |
| c19453.graph_c0 | 41.5376555    | 46.7950207    | 35.8365055    | 19.8096977     | 24.1374498     | 32.305315      | 4.513E-18 | -1.724674 | down      | PREDICTED: protein ECEK1FEKUM1-like [Sesamum indicum]                                         |
| c19467.graph_c0 | 0.84134946    | 0.90381575    | 0.76472814    | 3.57304963     | 3.68507492     | 3.39795857     | 0.0023046 | 1.069873  | up        | hypothetical protein MIMGU_mgv1a023991mg [Erythranthe guttata]                                |
| c19468.graph_c0 | 0.65296846    | 0.20111456    | 0.12909082    | 13.6507197     | 17.1574536     | 18.9400374     | 2.717E-33 | 4.650869  | up        | PREDICTED: probable sugar phosphate/phosphate translocator At1g12500 [Sesamum indicum]        |
| c19480.graph_c0 | 0.1016834     | 0             | 0             | 10.9602539     | 16.2753319     | 15.4620877     | 4.604E-39 | 7.711004  | up        | PREDICTED: peroxidase 44 [Sesamum indicum]                                                    |
| c19492.graph_c0 | 135.002675    | 136.635693    | 133.050524    | 40.1685838     | 27.3820563     | 33.5611419     | 1.946E-93 | -3.012144 | down      | l-asparaginase, putative [Ricinus communis]                                                   |
| c19498.graph_c0 | 0             | 0             | 0             | 1.08612261     | 1.90294053     | 1.44963805     | 1.457E-11 | Inf       | up        | predicted protein [Physcomitrella patens]                                                     |
| c19507.graph_c0 | 347.873114    | 190.615216    | 181.239426    | 0              | 0              | 0              | 7.683E-29 | -Inf      | down      | -                                                                                             |
| c19511.graph_c0 | 4.36867519    | 4.5533817     | 4.2249093     | 12.9869461     | 19.9997861     | 22.2991909     | 0.0005461 | 1.046914  | up        | PREDICTED: histone-lysine N-methyltransferase family member SUVH9 [Sesamum indicum]           |

| #ID             | 0 h-1<br>FPKM | 0 h-2<br>FPKM | 0 h-3<br>FPKM | 48 h-1<br>FPKM | 48 h-2<br>FPKM | 48 h-3<br>FPKM | FDR       | log2FC    | regulated | nr_annotation                                                                                                     |
|-----------------|---------------|---------------|---------------|----------------|----------------|----------------|-----------|-----------|-----------|-------------------------------------------------------------------------------------------------------------------|
| c19514.graph_c0 | 3.74253578    | 2.59822878    | 2.28829913    | 18.5461936     | 20.8257007     | 23.8503883     | 1.391E-20 | 1.856515  | up        | PREDICTED: omega-6 fatty acid desaturase, chloroplastic [Sesamum indicum]                                         |
| c19516.graph_c0 | 5.54320052    | 5.25975374    | 4.37781975    | 20.6930085     | 24.0068339     | 21.7258204     | 4.916E-06 | 1.112278  | up        | PREDICTED: myosin heavy chain IB isoform X1 [Sesamum indicum]                                                     |
| c19520.graph_c0 | 16.5809509    | 17.5435288    | 20.0927796    | 22.6361642     | 14.9247841     | 14.6483802     | 1.079E-05 | -1.06508  | down      | PREDICTED: calcium-binding protein PBP1-like [Sesamum indicum]                                                    |
| c19522.graph_c0 | 0.54875865    | 0.5053635     | 0.42310596    | 11.1828161     | 13.9034315     | 13.9449583     | 6.337E-46 | 3.704611  | up        | PREDICTED: putative leucine-rich repeat receptor-like serine/threonine-protein kinase At2g14440 [Sesamum indicum] |
| c19529.graph_c0 | 1.00161765    | 0.91543621    | 1.06327166    | 0.0401198      | 0.38251861     | 0.28558689     | 1.167E-08 | -3.116793 | down      | -                                                                                                                 |
| c19533.graph_c0 | 47.965989     | 46.5902911    | 55.0205973    | 36.2371134     | 31.8311352     | 25.0470591     | 1.157E-19 | -1.69842  | down      | PREDICTED: shaggy-related protein kinase alpha [Sesamum indicum]                                                  |
| c19541.graph_c0 | 0.73820271    | 0.7389419     | 0.63241314    | 13.7376257     | 14.4092561     | 15.3299986     | 1.158E-21 | 3.348079  | up        | PREDICTED: origin recognition complex subunit 1-like isoform X1 [Sesamum indicum]                                 |
| c19554.graph_c0 | 2.92788845    | 1.85756215    | 1.5367764     | 24.6561664     | 27.0056497     | 29.037785      | 1.684E-32 | 2.659615  | up        | PREDICTED: uncharacterized protein LOC105168795 [Sesamum indicum]                                                 |
| c19560.graph_c0 | 26.3138584    | 25.35245      | 26.1457384    | 8.05182133     | 9.21782582     | 6.85631329     | 7.068E-54 | -2.707428 | down      | PREDICTED: glutathione S-transferase omega-like 2 [Sesamum indicum]                                               |
| c19565.graph_c0 | 27.6032281    | 28.6247847    | 23.9877457    | 2.37833542     | 0.38762431     | 1.46508131     | 2.465E-39 | -5.239286 | down      | -                                                                                                                 |
| c19567.graph_c0 | 2.93934189    | 1.60488283    | 2.91872281    | 1.35395673     | 1.69514443     | 2.84757332     | 0.0097677 | -1.367189 | down      | -                                                                                                                 |
| c19570.graph_c0 | 0.85576057    | 0.32946826    | 0.84591247    | 2.66837139     | 5.0111737      | 4.42483334     | 0.0016711 | 1.544722  | up        | PREDICTED: probable glucan 1,3-alpha-glucosidase [Sesamum indicum]                                                |
| c19577.graph_c0 | 2406.73122    | 2236.25457    | 2518.98785    | 26.9406699     | 21.9246927     | 19.1038406     | 1.07E-241 | -7.732284 | down      | PREDICTED: reticulon-like protein B15 [Sesamum indicum]                                                           |
| c19580.graph_c0 | 1.13834323    | 1.82317297    | 1.1702529     | 7.27109783     | 10.2951506     | 12.75293       | 8.691E-06 | 1.85195   | up        | expansin 5 [Cucumis sativus]                                                                                      |
| c19592.graph_c0 | 0             | 0.12837874    | 0             | 12.4060183     | 15.0201967     | 24.1802297     | 1.508E-12 | 7.638183  | up        | PREDICTED: protein WALLS ARE THIN 1-like [Nicotiana sylvestris]                                                   |
| c19593.graph_c0 | 1.57099471    | 1.50704416    | 0.7570464     | 6.81438398     | 12.3937047     | 13.682889      | 6.859E-05 | 2.078903  | up        | PREDICTED: transcription factor bHLH95-like isoform X1 [Sesamum indicum]                                          |
| c19595.graph_c0 | 0.14269256    | 0.09522363    | 0.18336559    | 3.33026167     | 2.87811214     | 4.91275129     | 1.232E-09 | 3.698594  | up        | PREDICTED: protein IQ-DOMAIN 1 [Sesamum indicum]                                                                  |
| c19602.graph_c0 | 0             | 0             | 0             | 10.2384113     | 16.9648122     | 17.0521951     | 2.025E-13 | Inf       | up        | -                                                                                                                 |
| c19602.graph_c1 | 0.11008628    | 0.66117911    | 0.4243957     | 189.044392     | 199.839847     | 220.099551     | 8.8E-195  | 7.96998   | up        | PREDICTED: NAC domain-containing protein 100-like isoform X2 [Nicotiana tomentosiformis]                          |
| c19608.graph_c0 | 129.339462    | 132.063344    | 124.510637    | 19.6526959     | 29.7215073     | 33.2985591     | 1.27E-106 | -3.247834 | down      | hypothetical protein MIMGU_mgv1a012664mg [Erythranthe guttata]                                                    |
| c19622.graph_c0 | 5.11909416    | 5.32438501    | 4.00861419    | 17.2798779     | 18.9694767     | 24.1943331     | 2.838E-06 | 1.045943  | up        | PREDICTED: cyclin-D3-3-like [Sesamum indicum]                                                                     |
| c19632.graph_c0 | 0             | 0             | 0             | 5.72467442     | 5.61201642     | 4.78967455     | 4.364E-14 | Inf       | up        | NADH dehydrogenase subunit 1 (mitochondrion) [Cyanoptycha gloeocystis]                                            |

| #ID             | 0 h-1<br>FPKM | 0 h-2<br>FPKM | 0 h-3<br>FPKM | 48 h-1<br>FPKM | 48 h-2<br>FPKM | 48 h-3<br>FPKM | FDR       | log2FC    | regulated | nr_annotation                                                            |
|-----------------|---------------|---------------|---------------|----------------|----------------|----------------|-----------|-----------|-----------|--------------------------------------------------------------------------|
| c19652.graph_c0 | 0             | 0.1268796     | 0.16288221    | 3.09448007     | 3.27822641     | 3.48077611     | 1.281E-09 | 4.055441  | up        | PREDICTED: probable nucleoredoxin 2 [Sesamum indicum]                    |
| c19656.graph_c0 | 0.03091457    | 0             | 0.03972644    | 2.67716832     | 2.89647852     | 4.99233266     | 6.164E-11 | 6.192294  | up        | hypothetical protein M569_04675 [Genlisea aurea]                         |
| c19660.graph_c0 | 18.4637336    | 19.2435637    | 16.7838935    | 14.6662889     | 15.2043985     | 13.3724627     | 8.134E-19 | -1.349525 | down      | PREDICTED: uncharacterized protein LOC105172629 [Sesamum indicum]        |
| c19668.graph_c0 | 2.41526061    | 1.53316237    | 1.89250336    | 21.0570023     | 23.9171488     | 27.525115      | 2.515E-21 | 2.614001  | up        | PREDICTED: uncharacterized protein LOC105169149 [Sesamum indicum]        |
| c19685.graph_c0 | 0.73197928    | 0.87925469    | 0.56437341    | 5.5746023      | 7.33439304     | 6.2803135      | 9.894E-07 | 2.122653  | up        | hypothetical protein MIMGU_mgv1a026794mg [Erythranthe guttata]           |
| c19686.graph_c0 | 5.6757177     | 4.99963295    | 6.12655845    | 1.88238289     | 1.88336995     | 0.83746649     | 6.454E-10 | -2.881404 | down      | -                                                                        |
| c19688.graph_c0 | 0.43516081    | 0.13067897    | 0.55919888    | 2.76619983     | 3.69491938     | 3.67418611     | 1.114E-05 | 2.141881  | up        | PREDICTED: transcription factor bHLH66-like isoform X2 [Sesamum indicum] |
| c19697.graph_c0 | 0             | 0             | 0             | 104.772498     | 147.349032     | 187.839856     | 1.769E-29 | Inf       | up        | PREDICTED: non-specific lipid-transfer protein 2-like [Sesamum indicum]  |
| c19697.graph_c1 | 0             | 0             | 0             | 21.2557679     | 17.6390285     | 26.1633353     | 5.573E-14 | Inf       | up        | -                                                                        |
| c19702.graph_c0 | 0.26041409    | 0.20274711    | 0.22309494    | 3.43871638     | 6.7210149      | 6.40412614     | 2.014E-09 | 3.565406  | up        | PREDICTED: putative UPF0481 protein At3g02645 [Sesamum indicum]          |
| c19707.graph_c0 | 0.54371499    | 0.44821365    | 0.32879778    | 2.85810906     | 2.49717112     | 2.80530643     | 0.0007078 | 1.616124  | up        | PREDICTED: histone-lysine N-methyltransferase ASHR3 [Sesamum indicum]    |
| c19713.graph_c0 | 0.15614904    | 0.19538175    | 0.25082213    | 1.33065582     | 2.66694038     | 2.97602399     | 8.014E-05 | 2.499185  | up        | PREDICTED: WAT1-related protein At3g18200 [Sesamum indicum]              |
| c19719.graph_c0 | 36.3377323    | 36.5027631    | 33.0294781    | 3.16711383     | 2.53989737     | 1.76459142     | 4.82E-173 | -4.833818 | down      | SPIa/Ryanodine receptor domain-containing protein [Theobroma cacao]      |
| c19722.graph_c0 | 25.864239     | 24.2148938    | 27.8111896    | 169.527959     | 159.363043     | 169.770732     | 6.22E-33  | 1.660766  | up        | hypothetical protein MIMGU_mgv1a026562mg [Erythranthe guttata]           |
| c19727.graph_c0 | 17.4585684    | 9.5244475     | 11.8905243    | 0              | 0              | 0              | 4.934E-30 | -Inf      | down      | --                                                                       |
| c19728.graph_c0 | 0.14285693    | 0.07149999    | 0.27536522    | 5.52758322     | 6.13465198     | 7.904588       | 8.949E-13 | 4.288438  | up        | PREDICTED: uncharacterized protein LOC105160245 [Sesamum indicum]        |
| c19729.graph_c0 | 15.076573     | 11.8159586    | 15.3940644    | 1.66889611     | 1.42580086     | 1.86819275     | 1.957E-42 | -4.10873  | down      | hypothetical protein MIMGU_mgv1a012036mg [Erythranthe guttata]           |
| c19742.graph_c0 | 2.04525583    | 1.78594591    | 1.73351652    | 0.16035941     | 0.21235169     | 0.60641907     | 6.406E-12 | -3.53537  | down      | -                                                                        |
| c19746.graph_c0 | 2976.86331    | 2819.2395     | 3061.80676    | 129.192783     | 79.0693723     | 72.1271845     | 8.06E-181 | -5.988457 | down      | PREDICTED: 17.3 kDa class I heat shock protein-like [Sesamum indicum]    |
| c19751.graph_c0 | 0.5433238     | 0.78033214    | 0.66783639    | 4.30904233     | 5.16434019     | 8.26861767     | 6.628E-05 | 2.130272  | up        | PREDICTED: DNA replication licensing factor MCM7 [Sesamum indicum]       |
| c19755.graph_c0 | 0.06001965    | 0.06007975    | 0             | 32.5313143     | 50.2983819     | 49.823489      | 7.936E-57 | 9.100557  | up        | PREDICTED: probable beta-D-xylosidase 2 [Sesamum indicum]                |
| c19764.graph_c0 | 4.19359951    | 3.53085878    | 4.02911507    | 14.7856956     | 18.0351935     | 19.1319433     | 2.961E-11 | 1.122353  | up        | PREDICTED: probable galacturonosyltransferase 4 [Sesamum indicum]        |

| #ID             | 0 h-1<br>FPKM | 0 h-2<br>FPKM | 0 h-3<br>FPKM | 48 h-1<br>FPKM | 48 h-2<br>FPKM | 48 h-3<br>FPKM | FDR       | log2FC    | regulated | nr_annotation                                                                                                   |
|-----------------|---------------|---------------|---------------|----------------|----------------|----------------|-----------|-----------|-----------|-----------------------------------------------------------------------------------------------------------------|
| c19769.graph_c0 | 3.95417972    | 2.63875949    | 2.29155651    | 17.2856722     | 20.2038168     | 14.7451216     | 3.477E-06 | 1.541831  | up        | -                                                                                                               |
| c19778.graph_c0 | 0.7245456     | 0.72527112    | 1.70696126    | 4.33874131     | 7.07133894     | 4.94946913     | 0.0066501 | 1.339307  | up        | PREDICTED: uncharacterized protein LOC102622885 [Citrus sinensis]                                               |
| c19787.graph_c0 | 493.291072    | 478.612443    | 506.13531     | 55.5794549     | 44.6724039     | 38.4439247     | 8.14E-167 | -4.42589  | down      | hypothetical protein MIMGU_mgv1a013874mg [Erythranthe guttata]                                                  |
| c19791.graph_c0 | 3.93770048    | 3.26670454    | 3.43116439    | 13.7652552     | 15.8987395     | 16.2720317     | 3.689E-08 | 1.091247  | up        | PREDICTED: cytosolic enolase 3 [Sesamum indicum]                                                                |
| c19792.graph_c0 | 12.6417582    | 11.3223731    | 12.458694     | 0.35026804     | 0.37106651     | 0.35062469     | 5.214E-80 | -6.104877 | down      | hypothetical protein MIMGU_mgv1a004859mg [Erythranthe guttata]                                                  |
| c19801.graph_c0 | 11.7672543    | 5.68643188    | 7.99521649    | 212.827837     | 210.416667     | 192.36653      | 3.833E-87 | 3.58192   | up        | unnamed protein product [Coffea canephora]                                                                      |
| c19806.graph_c0 | 3.35690653    | 3.2861444     | 2.66437981    | 19.4424564     | 25.1258395     | 23.9161881     | 6.342E-25 | 1.859836  | up        | PREDICTED: probable dolichyl-diphosphooligosaccharide--protein glycosyltransferase subunit 3B [Sesamum indicum] |
| c19810.graph_c0 | 11.2872278    | 10.9715105    | 11.0620691    | 2.24223015     | 3.76233253     | 5.18196352     | 1.515E-54 | -2.60287  | down      | PREDICTED: probable receptor protein kinase TMK1 [Sesamum indicum]                                              |
| c19815.graph_c0 | 0.18894528    | 0.41609586    | 0.63128564    | 3.2028644      | 4.3519509      | 4.77046718     | 3.519E-07 | 2.284281  | up        | PREDICTED: radical S-adenosyl methionine domain-containing protein 1, mitochondrial [Sesamum indicum]           |
| c19818.graph_c0 | 4.86687728    | 5.16075288    | 5.03510465    | 19.7966083     | 21.4551488     | 20.2013523     | 6.521E-10 | 1.009853  | up        | PREDICTED: nuclear pore complex protein NUP93A-like [Sesamum indicum]                                           |
| c19819.graph_c0 | 15.0248126    | 8.39114011    | 10.1835179    | 0              | 0              | 0              | 4.333E-30 | -Inf      | down      | unnamed protein product [Chondrus crispus]                                                                      |
| c19832.graph_c0 | 0             | 0             | 0             | 13.2696991     | 13.0911746     | 11.6597072     | 4.953E-24 | Inf       | up        | ATPase subunit 6 [Cycas taitungensis]                                                                           |
| c19836.graph_c0 | 5.16103918    | 3.92922799    | 3.45618546    | 1.00451111     | 0.85132617     | 0.53628477     | 1.38E-13  | -3.398235 | down      | PREDICTED: gibberellin 2-beta-oxxygenase [Sesamum indicum]                                                      |
| c19839.graph_c1 | 1.43923688    | 1.42038682    | 1.27639919    | 4.59402884     | 8.21027987     | 9.0229366      | 0.0009223 | 1.373089  | up        | PREDICTED: receptor-like protein kinase HSL1 [Sesamum indicum]                                                  |
| c19846.graph_c0 | 4.48013357    | 4.09465282    | 4.6307503     | 3.40958409     | 4.37247057     | 3.5128528      | 0.0040831 | -1.246792 | down      | hypothetical protein MIMGU_mgv1a0026501mg, partial [Erythranthe guttata]                                        |
| c19853.graph_c0 | 9.30920639    | 10.020342     | 8.95951079    | 2.40422018     | 5.70219349     | 6.76900388     | 1.609E-17 | -1.958679 | down      | PREDICTED: probable LRR receptor-like serine/threonine-protein kinase At4g36180 [Sesamum indicum]               |
| c19859.graph_c0 | 15.988221     | 19.2431822    | 17.1212475    | 16.570566      | 8.54505025     | 9.04946688     | 9.667E-11 | -1.61987  | down      | PREDICTED: uncharacterized protein DDB_G0287625-like [Sesamum indicum]                                          |
| c19875.graph_c0 | 0.15775389    | 0.42109829    | 0.06757333    | 39.0946241     | 69.0266896     | 81.3832377     | 6.458E-20 | 7.176717  | up        | PREDICTED: vestitone reductase-like [Sesamum indicum]                                                           |
| c19877.graph_c0 | 1.80941168    | 1.22379968    | 1.94811176    | 6.44252899     | 7.6364512      | 10.6632956     | 0.0002585 | 1.287015  | up        | PREDICTED: putative phospholipid-transporting ATPase 4 isoform X1 [Sesamum indicum]                             |
| c19884.graph_c0 | 65.2938074    | 65.2196819    | 53.1011106    | 8.79503655     | 10.269405      | 9.71081027     | 5.723E-93 | -3.691552 | down      | PREDICTED: uncharacterized protein LOC105166661 [Sesamum indicum]                                               |
| c19885.graph_c0 | 16.9539225    | 15.4690498    | 16.0024453    | 10.0901887     | 11.128619      | 13.897745      | 4.022E-06 | -1.484301 | down      | atypical dual-specificity phosphatase 1 [Arabidopsis thaliana]                                                  |
| c19888.graph_c0 | 6.66948108    | 5.00711967    | 5.53514509    | 0              | 0              | 0              | 7.941E-25 | -Inf      | down      | 60S ribosomal protein L26B [Populus trichocarpa]                                                                |

| #ID             | 0 h-1<br>FPKM | 0 h-2<br>FPKM | 0 h-3<br>FPKM | 48 h-1<br>FPKM | 48 h-2<br>FPKM | 48 h-3<br>FPKM | FDR       | log2FC    | regulated | nr_annotation                                                                             |
|-----------------|---------------|---------------|---------------|----------------|----------------|----------------|-----------|-----------|-----------|-------------------------------------------------------------------------------------------|
| c19890.graph_c0 | 0.13293002    | 0.26612626    | 0.17082034    | 4.40869706     | 5.83809995     | 8.71740475     | 2.404E-07 | 4.031669  | up        | PREDICTED: uncharacterized protein LOC105158935 [Sesamum indicum]                         |
| c19916.graph_c0 | 1344.43037    | 1348.4148     | 1364.68462    | 32.1143083     | 29.0223779     | 22.9905375     | 8.09E-225 | -6.605647 | down      | hypothetical protein MIMGU_mgv1a010720mg [Erythranthe guttata]                            |
| c19917.graph_c0 | 0.95666917    | 0             | 0.52686761    | 7.93211432     | 9.33679256     | 5.71357665     | 5.126E-07 | 2.938114  | up        | -                                                                                         |
| c19931.graph_c0 | 22.6273472    | 21.8253689    | 22.7958324    | 15.1789719     | 16.4018858     | 14.2715069     | 1.051E-18 | -1.570613 | down      | PREDICTED: cnaperone protein anaj / 2 [Sesamum indicum]                                   |
| c19932.graph_c0 | 0.12207268    | 0.16292656    | 0             | 0.97466476     | 2.97847825     | 4.30289841     | 0.0028928 | 3.836836  | up        | PREDICTED: uncharacterized protein LOC105155205 [Sesamum indicum]                         |
| c19933.graph_c0 | 3.79883537    | 2.53509288    | 3.3629171     | 0.6221751      | 0.65911907     | 0.55360766     | 3.587E-11 | -3.419103 | down      | -                                                                                         |
| c19942.graph_c0 | 0             | 0             | 0.08459125    | 2.12256815     | 1.9273745      | 2.53618496     | 2.716E-10 | 5.232507  | up        | PREDICTED: cell division cycle-associated 7-like protein isoform X1 [Sesamum indicum]     |
| c19944.graph_c0 | 174.505401    | 168.680333    | 188.870882    | 1.02549305     | 1.1281696      | 0.91247755     | 0         | -8.45775  | down      | PREDICTED: F-box/kelch-repeat protein At1g23390-like [Sesamum indicum]                    |
| c19947.graph_c0 | 0             | 0             | 0             | 2.45453041     | 3.7247216      | 4.72221924     | 8.221E-12 | Inf       | up        | PREDICTED: uncharacterized protein At1g08160-like [Sesamum indicum]                       |
| c19957.graph_c0 | 0.12222524    | 0.04893905    | 0.09423857    | 11.4178293     | 13.4318316     | 16.1911022     | 1.513E-52 | 6.25113   | up        | PREDICTED: probable beta-D-xylosidase / [Sesamum indicum]                                 |
| c19964.graph_c0 | 8.62530099    | 9.09812814    | 8.34268525    | 3.50315897     | 2.53445903     | 2.05271766     | 4.831E-13 | -2.696419 | down      | PREDICTED: probable E3 ubiquitin-protein ligase XERICO [Sesamum indicum]                  |
| c19973.graph_c0 | 0.78729759    | 0.60621996    | 0.23347121    | 3.23599799     | 4.55116131     | 5.01407804     | 0.0001738 | 1.961657  | up        | unnamed protein product [Coffea canephora]                                                |
| c19983.graph_c0 | 1.65724115    | 1.45153805    | 0.8518482     | 11.4125208     | 12.3732297     | 13.7208566     | 6.705E-13 | 2.229678  | up        | PREDICTED: glucuronokinase 1-like [Sesamum indicum]                                       |
| c19987.graph_c0 | 39.3644392    | 33.1474258    | 39.2107517    | 14.2699906     | 15.7235332     | 14.8294886     | 9.987E-45 | -2.33705  | down      | PREDICTED: uncharacterized protein LOC105163283 [Sesamum indicum]                         |
| c19990.graph_c0 | 26.4654423    | 24.9156474    | 31.5939046    | 0.70196809     | 0.94195676     | 0.29148326     | 4.725E-77 | -6.441017 | down      | PREDICTED: benzoate carboxyl methyltransferase-like [Sesamum indicum]                     |
| c20002.graph_c0 | 0.12975054    | 0             | 0.08336729    | 1.79301996     | 4.36882064     | 4.94579698     | 8.278E-06 | 4.671606  | up        | hypothetical protein MIMGU_mgv1a021791mg [Erythranthe guttata]                            |
| c20007.graph_c0 | 45.7618919    | 52.6208884    | 53.2230097    | 47.7622297     | 43.5314905     | 38.9372142     | 1.563E-11 | -1.235043 | down      | unnamed protein product [Coffea canephora]                                                |
| c20009.graph_c0 | 0             | 0             | 0             | 2.84964773     | 4.99672756     | 4.80889544     | 3.721E-12 | Inf       | up        | -                                                                                         |
| c20017.graph_c0 | 0.25151993    | 0.62942947    | 0.64642613    | 7.41493002     | 5.03224983     | 4.5359601      | 2.783E-05 | 2.460796  | up        | hypothetical protein MIMGU_mgv1a022798mg, partial [Erythranthe guttata]                   |
| c20019.graph_c0 | 0.58928846    | 0.19662618    | 0.50483933    | 6.15276426     | 3.83418098     | 4.91112134     | 7.942E-06 | 2.517386  | up        | PREDICTED: uncharacterized protein LOC105167731 [Sesamum indicum]                         |
| c20028.graph_c0 | 5.3707566     | 6.68656741    | 6.08206572    | 0.95865394     | 1.9328735      | 3.27443666     | 4.956E-20 | -2.588917 | down      | PREDICTED: probable L-type lectin-domain containing receptor kinase S.7 [Sesamum indicum] |
| c20029.graph_c0 | 8.20482025    | 6.85923897    | 6.4883193     | 0              | 0.08799614     | 0              | 3.655E-36 | -8.987078 | down      | hypothetical protein MIMGU_mgv1a021012mg [Erythranthe guttata]                            |



| #ID             | 0 h-1<br>FPKM | 0 h-2<br>FPKM | 0 h-3<br>FPKM | 48 h-1<br>FPKM | 48 h-2<br>FPKM | 48 h-3<br>FPKM | FDR       | log2FC    | regulated | nr_annotation                                                                                     |
|-----------------|---------------|---------------|---------------|----------------|----------------|----------------|-----------|-----------|-----------|---------------------------------------------------------------------------------------------------|
| c20032.graph_c0 | 32.646766     | 36.0153002    | 28.9914869    | 12.9325503     | 13.9019464     | 17.4785334     | 1.698E-44 | -2.158881 | down      | PREDICTED: DNA topoisomerase 6 subunit A [Sesamum indicum]                                        |
| c20045.graph_c0 | 15.3763512    | 15.2984649    | 12.4542963    | 4.29263565     | 3.18326887     | 3.66677893     | 3.071E-22 | -2.962999 | down      | PREDICTED: uncharacterized protein LOC105176125 [Sesamum indicum]                                 |
| c20049.graph_c0 | 21.4425848    | 18.1618938    | 22.1042158    | 145.443804     | 178.341937     | 198.661717     | 4.793E-25 | 2.058778  | up        | V-type proton ATPase 16 kDa proteolipid subunit [Morus notabilis]                                 |
| c20054.graph_c0 | 0             | 0             | 0             | 3.15231304     | 4.35891774     | 4.01544894     | 8.307E-20 | Inf       | up        | PREDICTED: uncharacterized protein LOC105178927 [Sesamum indicum]                                 |
| c20061.graph_c0 | 2.35129873    | 2.22756464    | 2.05031169    | 10.2506247     | 13.5433836     | 12.8553686     | 1.799E-12 | 1.445945  | up        | PREDICTED: polygalacturonate 4-alpha-galacturonosyltransferase-like [Sesamum indicum]             |
| c20067.graph_c0 | 2.87242741    | 2.3795617     | 2.41836124    | 1.09500724     | 1.54670319     | 1.94866171     | 0.000382  | -1.764689 | down      | PREDICTED: G-type lectin S-receptor-like serine/threonine-protein kinase SD1-1 [Nelumbo nucifera] |
| c20070.graph_c0 | 0.92940246    | 1.05168092    | 1.03853823    | 0.63286282     | 0.63100369     | 0.79498946     | 0.0016302 | -1.572455 | down      | -                                                                                                 |
| c20071.graph_c0 | 1.76559928    | 1.3633976     | 1.23166956    | 6.55281473     | 9.50205063     | 8.55989798     | 8.8E-05   | 1.476338  | up        | PREDICTED: phosphoserine phosphatase, chloroplastic [Sesamum indicum]                             |
| c20073.graph_c0 | 27.71263      | 30.3129516    | 26.4203944    | 18.5703623     | 27.3790793     | 33.6060012     | 1.896E-10 | -1.110913 | down      | PREDICTED: ocs element-binding factor 1 [Sesamum indicum]                                         |
| c20074.graph_c0 | 9.16627718    | 7.23697924    | 9.12459999    | 2.25981515     | 3.5280002      | 2.22242993     | 2.284E-10 | -2.695826 | down      | -                                                                                                 |
| c20076.graph_c0 | 4.78088835    | 6.62632018    | 5.87358111    | 3.96885964     | 4.87109666     | 6.24466803     | 0.0001033 | -1.219947 | down      | hypothetical protein MIMGU_mgv1a023657mg [Erythranthe guttata]                                    |
| c20081.graph_c0 | 0.27205828    | 0.2723307     | 0.34960566    | 6.76722139     | 8.62941263     | 10.0357215     | 1.401E-09 | 3.804442  | up        | PREDICTED: aquaporin TIP1-3-like [Sesamum indicum]                                                |
| c20082.graph_c0 | 0             | 0.0623051     | 0             | 4.30065738     | 3.64482001     | 3.5715858      | 2.999E-13 | 6.527946  | up        | PREDICTED: ras-related protein RAB7-like [Sesamum indicum]                                        |
| c20085.graph_c0 | 26.8514898    | 27.2175369    | 26.994626     | 1.52169781     | 1.48805013     | 1.18040813     | 2.89E-148 | -5.289223 | down      | PREDICTED: UDP-glycosyltransferase 86A1-like [Sesamum indicum]                                    |
| c20086.graph_c0 | 14.8492964    | 12.2915216    | 12.2931689    | 3.55157491     | 3.06571056     | 3.68686499     | 1.8E-25   | -2.950916 | down      | -                                                                                                 |
| c20090.graph_c0 | 1.11087883    | 0.9772044     | 1.03819875    | 5.08605765     | 6.50509848     | 6.92628916     | 1.315E-05 | 1.544217  | up        | PREDICTED: cyclin-D4-1-like [Sesamum indicum]                                                     |
| c20097.graph_c0 | 2.14236831    | 1.60838517    | 2.06477107    | 0.38377294     | 0.52272115     | 0.73174041     | 3.035E-08 | -2.853742 | down      | hypothetical protein MIMGU_mgv1a023283mg [Erythranthe guttata]                                    |
| c20099.graph_c0 | 0             | 0             | 0             | 1.75987471     | 1.3982804      | 1.17444445     | 2.389E-11 | Inf       | up        | predicted protein [Physcomitrella patens]                                                         |
| c20108.graph_c0 | 0.39616017    | 0.21630374    | 0.09256027    | 2.12345358     | 2.53073428     | 3.12937875     | 5.445E-06 | 2.453624  | up        | PREDICTED: F-box protein AtUG10/8U [Sesamum indicum]                                              |
| c20112.graph_c0 | 0.60693055    | 0.36002269    | 0.54883948    | 11.5970609     | 12.7025153     | 13.2304258     | 1.978E-42 | 3.609803  | up        | PREDICTED: pentatricopeptide repeat-containing protein At2g15820 isoform X1 [Sesamum indicum]     |
| c20115.graph_c0 | 4.93631992    | 4.41559663    | 3.91399211    | 0              | 0              | 0              | 3.402E-25 | -Inf      | down      | -                                                                                                 |
| c20120.graph_c0 | 0.56860528    | 0.15177991    | 0.09742404    | 3.77162117     | 3.55162249     | 3.32489208     | 1.916E-07 | 2.699995  | up        | PREDICTED: probable protein phosphatase 2C 38 [Sesamum indicum]                                   |
| c20121.graph_c0 | 27.8863766    | 24.0969603    | 29.0968744    | 317.840677     | 318.569501     | 363.309332     | 8.353E-69 | 2.604569  | up        | hypothetical protein CICLE_V10020/8/mg [Citrus clementina]                                        |

| #ID             | 0 h-1<br>FPKM | 0 h-2<br>FPKM | 0 h-3<br>FPKM | 48 h-1<br>FPKM | 48 h-2<br>FPKM | 48 h-3<br>FPKM | FDR       | log2FC    | regulated | nr_annotation                                                                                     |
|-----------------|---------------|---------------|---------------|----------------|----------------|----------------|-----------|-----------|-----------|---------------------------------------------------------------------------------------------------|
| c20123.graph_c0 | 26.214793     | 24.0365111    | 24.1013018    | 113.881714     | 118.771807     | 121.946935     | 1.395E-16 | 1.235905  | up        | PREDICTED: NADH dehydrogenase [ubiquinone] 1 beta subcomplex subunit 10-B-like [Sesamum indicum]  |
| c20125.graph_c0 | 2.14337016    | 1.49253317    | 1.19752849    | 19.4027131     | 20.1000692     | 26.6605385     | 4.322E-14 | 2.759431  | up        | PREDICTED: glycine cleavage system H protein 3, mitochondrial-like [Sesamum indicum]              |
| c20126.graph_c0 | 11.6395699    | 16.8083249    | 8.21425942    | 93.5197656     | 84.7333601     | 74.6886517     | 1.638E-11 | 1.776686  | up        | PREDICTED: plastid division protein PDV2-like [Sesamum indicum]                                   |
| c20131.graph_c0 | 0.83122105    | 1.01035055    | 0.68666912    | 33.8855459     | 53.9478464     | 59.2315668     | 1.514E-21 | 4.838661  | up        | PREDICTED: protein ASPARTIC PROTEASE IN GUARD CELL 2 [Sesamum indicum]                            |
| c20135.graph_c0 | 0.09579202    | 0.03196265    | 0             | 37.7121051     | 40.9174661     | 35.047964      | 4.23E-150 | 8.798398  | up        | PREDICTED: membrane protein of ER body-like protein [Sesamum indicum]                             |
| c20139.graph_c0 | 0.63491358    | 0.34221888    | 0.56484629    | 9.71873399     | 12.5361144     | 13.4519328     | 1.382E-19 | 3.51001   | up        | PREDICTED: protein IQ-DOMAIN 14-like [Sesamum indicum]                                            |
| c20147.graph_c0 | 36.6726467    | 45.3606213    | 29.1159419    | 25.6079163     | 29.636157      | 30.6363293     | 5.944E-07 | -1.389372 | down      | PREDICTED: uncharacterized protein LOC105166783 [Sesamum indicum]                                 |
| c20167.graph_c0 | 3.91116275    | 3.68478041    | 4.77258727    | 0.90837434     | 1.53969995     | 1.61653206     | 4.413E-15 | -2.634909 | down      | PREDICTED: pentatricopeptide repeat-containing protein At3g22690 [Sesamum indicum]                |
| c20172.graph_c0 | 30.4805458    | 30.6905444    | 29.3995715    | 5.2857726      | 6.92954848     | 6.93729179     | 2.046E-87 | -3.263512 | down      | PREDICTED: ethylene-responsive transcription factor ERF008-like [Nelumbo nucifera]                |
| c20173.graph_c0 | 7.63749349    | 7.40472804    | 7.90096625    | 7.65569301     | 7.594596       | 6.57573563     | 2.216E-05 | -1.088676 | down      | PREDICTED: uncharacterized protein At3g17611 [Sesamum indicum]                                    |
| c20191.graph_c0 | 6.54293365    | 6.09637635    | 7.13880746    | 4.4355342      | 4.0964862      | 4.958689       | 7.485E-09 | -1.570628 | down      | hypothetical protein MIMGU_mgv1a014744mg [Erythranthe guttata]                                    |
| c20195.graph_c0 | 7.69703814    | 6.34159827    | 4.71724556    | 72.7647085     | 81.0147755     | 71.4434208     | 1.243E-48 | 2.571757  | up        | monodehydroascorbate reductase [Acanthus ebracteatus]                                             |
| c20199.graph_c0 | 81.4503773    | 87.8036251    | 75.2413583    | 39.7175983     | 39.5281259     | 42.1884624     | 5.547E-43 | -2.02633  | down      | PREDICTED: NAC domain-containing protein 18 [Sesamum indicum]                                     |
| c20225.graph_c0 | 0.64099947    | 2.08533434    | 2.26520167    | 19.1184257     | 16.343682      | 15.0410208     | 8.468E-11 | 2.317914  | up        | -                                                                                                 |
| c20226.graph_c0 | 0             | 0.06917109    | 0             | 2.06898814     | 2.56276918     | 2.69065315     | 2.838E-13 | 5.715948  | up        | PREDICTED: probable LRR receptor-like serine/threonine-protein kinase At1g05700 [Sesamum indicum] |
| c20239.graph_c0 | 1.84894046    | 1.2125878     | 1.26991056    | 35.1832885     | 39.2324972     | 35.1733827     | 7.734E-76 | 3.645088  | up        | PREDICTED: trihelix transcription factor GTL1 isoform X1 [Sesamum indicum]                        |
| c20254.graph_c0 | 1.37071973    | 3.56743997    | 1.58528621    | 64.528897      | 36.3876074     | 21.4613074     | 0.0028313 | 3.231131  | up        | unnamed protein product [Coffea canephora]                                                        |
| c20255.graph_c0 | 10.6277847    | 6.17538818    | 7.43658472    | 0              | 0              | 0              | 1.621E-38 | -Inf      | down      | --                                                                                                |
| c20256.graph_c0 | 0.34321666    | 0.41990708    | 0.39204178    | 1.58096788     | 1.86093751     | 2.53212428     | 0.0077327 | 1.347224  | up        | PREDICTED: uncharacterized protein LOC101258386 [Solanum lycopersicum]                            |
| c20259.graph_c0 | 4.28935444    | 1.66619238    | 2.7971294     | 0              | 0              | 0              | 3.469E-11 | -Inf      | down      | uncharacterized protein LOC100273024 [Zea mays]                                                   |
| c20263.graph_c0 | 6.41187082    | 4.81371851    | 5.29682648    | 0              | 0              | 0              | 1.017E-19 | -Inf      | down      | putative 40s ribosomal protein s21 protein [Neofusicoccum parvum UCRNP2]                          |

| #ID             | 0 h-1<br>FPKM | 0 h-2<br>FPKM | 0 h-3<br>FPKM | 48 h-1<br>FPKM | 48 h-2<br>FPKM | 48 h-3<br>FPKM | FDR       | log2FC    | regulated | nr_annotation                                                                                         |
|-----------------|---------------|---------------|---------------|----------------|----------------|----------------|-----------|-----------|-----------|-------------------------------------------------------------------------------------------------------|
| c20279.graph_c0 | 0.60035519    | 0.41604671    | 0.29672315    | 8.76429158     | 8.56356213     | 9.4640946      | 3.947E-15 | 3.338924  | up        | PREDICTED: haloacid dehalogenase-like hydrolase domain-containing protein At2g33255 [Sesamum indicum] |
| c20280.graph_c0 | 5.58849168    | 7.14800096    | 6.71596981    | 74.0332794     | 74.6921499     | 83.6897139     | 6.924E-54 | 2.559232  | up        | PREDICTED: 50S ribosomal protein L3, chloroplastic-like [Sesamum indicum]                             |
| c20281.graph_c0 | 0.08475428    | 0.04241957    | 0.10891261    | 2.30339458     | 2.64696109     | 2.01480856     | 2.849E-09 | 3.859163  | up        | PREDICTED: BTB/POZ domain-containing protein At5g60050 [Sesamum indicum]                              |
| c20285.graph_c0 | 7.66766925    | 8.67029968    | 6.75130679    | 8.89535331     | 6.23617161     | 5.58708133     | 0.0031665 | -1.163724 | down      | PREDICTED: aemim statorpnsnoproprotein [Sesamum indicum]                                              |
| c20293.graph_c0 | 24.3837383    | 23.9031587    | 22.906285     | 181.608933     | 188.822978     | 207.016076     | 1.167E-45 | 2.001607  | up        | PREDICTED: 40S ribosomal protein S10-like [Sesamum indicum]                                           |
| c20297.graph_c0 | 35.682738     | 39.3392451    | 36.4945448    | 19.9040869     | 20.3703794     | 19.3533694     | 5.834E-35 | -1.920528 | down      | PREDICTED: uncharacterized protein At4g18255 [Sesamum indicum]                                        |
| c20298.graph_c0 | 1.12751561    | 1.03459093    | 0.80494567    | 5.53995161     | 5.65493641     | 7.34277536     | 3.579E-06 | 1.626665  | up        | PREDICTED: uncharacterized protein LOC105161749 [Sesamum indicum]                                     |
| c20309.graph_c0 | 13.3067841    | 15.1244264    | 13.5571679    | 6.83773244     | 9.15816762     | 10.0823442     | 1.187E-15 | -1.710266 | down      | PREDICTED: probable 3-hydroxyisobutyrate dehydrogenase-like 3, mitochondrial [Sesamum indicum]        |
| c20315.graph_c0 | 6.05323205    | 5.95571578    | 5.85060316    | 3.14579252     | 4.29196646     | 4.62276806     | 4.264E-07 | -1.589692 | down      | BnaA09g38920D [Brassica napus]                                                                        |
| c20322.graph_c0 | 0             | 0             | 0             | 3.304683       | 4.94246249     | 6.48636853     | 6.202E-11 | Inf       | up        | PREDICTED: inorganic phosphate transporter 1-4-like [Sesamum indicum]                                 |
| c20327.graph_c0 | 0             | 0.20163582    | 0             | 2.69082653     | 2.06423079     | 2.146597       | 6.521E-09 | 4.096397  | up        | PREDICTED: putative NVAZZ-like protein g [Sesamum indicum]                                            |
| c20329.graph_c0 | 0             | 0             | 0             | 1.54947673     | 3.02378394     | 3.48306967     | 9.104E-08 | Inf       | up        | hypothetical protein M569_01834 [Genlisea aurea]                                                      |
| c20335.graph_c0 | 0.89392663    | 0.85008067    | 0.516929      | 42.6595541     | 43.0115136     | 49.719399      | 5.553E-96 | 4.890595  | up        | PREDICTED: perakine reductase-like [Sesamum indicum]                                                  |
| c20336.graph_c0 | 5.72828534    | 3.71649532    | 2.86263967    | 0              | 0              | 0              | 1.299E-15 | -Inf      | down      | probable 40S ribosomal protein S27 [Piriformospora indica DSM 11827]                                  |
| c20338.graph_c0 | 3.08081037    | 2.63695398    | 2.98356654    | 11.7643135     | 12.5500165     | 12.8102636     | 9.853E-05 | 1.07403   | up        | PREDICTED: BAG family molecular chaperone regulator 8, chloroplastic [Sesamum indicum]                |
| c20366.graph_c0 | 2.27842677    | 2.91423834    | 3.09052797    | 0.58306537     | 0.9882993      | 0.93385452     | 2.691E-07 | -2.753921 | down      | -                                                                                                     |
| c20368.graph_c0 | 0.25634208    | 0.1140439     | 0             | 7.60956912     | 13.398629      | 16.203581      | 1.852E-13 | 5.640661  | up        | PREDICTED: protein NRT1/ PTR FAMILY 2.13-like [Sesamum indicum]                                       |
| c20375.graph_c0 | 1.35356305    | 1.16522986    | 1.11320455    | 15.2382248     | 15.7731615     | 16.6434707     | 7.041E-31 | 2.696863  | up        | PREDICTED: exopolygalacturonase [Sesamum indicum]                                                     |
| c20376.graph_c0 | 20.9526758    | 23.1441091    | 19.731745     | 16.1027958     | 16.0872467     | 15.7065771     | 1.02E-22  | -1.43046  | down      | PREDICTED: pentatricopeptide repeat-containing protein At5g02860 [Sesamum indicum]                    |
| c20380.graph_c0 | 0             | 0             | 0             | 1.25841891     | 2.25608687     | 1.46426699     | 6.459E-10 | Inf       | up        | chlorophyllase [Picrorhiza kurrooa]                                                                   |
| c20382.graph_c0 | 1.76004365    | 1.66570756    | 1.80938062    | 54.9824723     | 77.5172683     | 83.8381459     | 1.186E-33 | 4.344224  | up        | PREDICTED: fasciclin-like arabinogalactan protein 1 [Sesamum indicum]                                 |
| c20385.graph_c0 | 40.9855089    | 41.8933078    | 38.5207617    | 17.7016823     | 16.9418946     | 13.4862432     | 2.398E-54 | -2.348833 | down      | hypothetical protein MIMGU_mgv1a003020mg [Erythranthe guttata]                                        |

| #ID             | 0 h-1<br>FPKM | 0 h-2<br>FPKM | 0 h-3<br>FPKM | 48 h-1<br>FPKM | 48 h-2<br>FPKM | 48 h-3<br>FPKM | FDR       | log2FC    | regulated | nr_annotation                                                                                   |
|-----------------|---------------|---------------|---------------|----------------|----------------|----------------|-----------|-----------|-----------|-------------------------------------------------------------------------------------------------|
| c20387.graph_c0 | 94.224968     | 102.419745    | 95.4753915    | 128.182404     | 90.0848885     | 69.362259      | 2.465E-06 | -1.03022  | down      | PREDICTED: uncharacterized protein LOC105158345 [Sesamum indicum]                               |
| c20394.graph_c0 | 2.08641542    | 1.79014684    | 0.76603612    | 22.2419285     | 32.5804216     | 26.1433156     | 9.089E-09 | 3.10991   | up        | -                                                                                               |
| c20398.graph_c0 | 15.505617     | 8.50788608    | 9.88886834    | 0              | 0              | 0              | 4.473E-22 | -Inf      | down      | --                                                                                              |
| c20399.graph_c0 | 0.83630069    | 1.17199337    | 1.1463248     | 7.85863841     | 6.74728128     | 6.3070232      | 3.688E-05 | 1.713041  | up        | myb family transcription factor family protein [Populus trichocarpa]                            |
| c20408.graph_c0 | 0.21806392    | 0.13096937    | 0.11208831    | 6.79024106     | 9.61962587     | 13.2636137     | 1.101E-12 | 4.987383  | up        | PREDICTED: aspartic proteinase nepenthesin-1 [Sesamum indicum]                                  |
| c20415.graph_c0 | 27.789405     | 27.1489501    | 26.9169126    | 152.532139     | 132.350112     | 122.861409     | 2.66E-11  | 1.302779  | up        | PREDICTED: probable E3 ubiquitin-protein ligase RHA2B [Sesamum indicum]                         |
| c20419.graph_c0 | 0             | 0             | 0             | 5.46260354     | 6.90702402     | 9.56439027     | 2.171E-15 | Inf       | up        | PREDICTED: thymidine kinase [Sesamum indicum]                                                   |
| c20444.graph_c0 | 0.41049386    | 0.24654294    | 0.66816775    | 13.4377727     | 12.633174      | 11.6652189     | 3.058E-38 | 3.808287  | up        | PREDICTED: transcription factor DIVARICATA-like [Sesamum indicum]                               |
| c20447.graph_c0 | 1.1749342     | 0.48428088    | 0.97695333    | 32.0270758     | 35.2778611     | 37.4490003     | 1.898E-46 | 4.292125  | up        | PREDICTED: uncharacterized protein At5g01610-like [Sesamum indicum]                             |
| c20460.graph_c0 | 4.7822646     | 5.08013821    | 4.13873834    | 1.3486941      | 1.85741123     | 1.08005391     | 1.503E-13 | -2.726133 | down      | PREDICTED: lysM domain receptor-like kinase 3 [Sesamum indicum]                                 |
| c20472.graph_c0 | 118.075129    | 112.735985    | 114.014348    | 53.0475847     | 25.6569575     | 14.3257234     | 1.408E-72 | -2.887464 | down      | PREDICTED: uncharacterized protein LOC105175062 [Sesamum indicum]                               |
| c20473.graph_c0 | 0.43637762    | 0.39313313    | 0.47664814    | 3.07544936     | 3.55618933     | 4.34623184     | 1.029E-07 | 2.048155  | up        | PREDICTED: uncharacterized protein LOC105174198 [Sesamum indicum]                               |
| c20480.graph_c0 | 1.1853104     | 1.08479754    | 0.82686415    | 25.3964571     | 38.9354568     | 42.585677      | 6.026E-20 | 4.087316  | up        | PREDICTED: protein notum homolog [Sesamum indicum]                                              |
| c20483.graph_c0 | 2.52553295    | 2.85426342    | 3.35010046    | 0              | 0.15902202     | 0.06678293     | 1.808E-19 | -6.324719 | down      | -                                                                                               |
| c20493.graph_c0 | 0             | 0             | 0.07275881    | 5.05970842     | 4.80755502     | 3.66665723     | 2.61E-15  | 6.492442  | up        | Uncharacterized protein F383_18135 [Gossypium arboreum]                                         |
| c20501.graph_c0 | 9.26691936    | 8.61986396    | 6.51589415    | 26.4172764     | 32.977289      | 40.9562229     | 0.0001664 | 1.020252  | up        | PREDICTED: geranylgeranyl pyrophosphate synthase, chloroplastic-like [Sesamum indicum]          |
| c20506.graph_c0 | 18.1048829    | 18.0305478    | 19.7044467    | 17.7431362     | 16.6330522     | 17.7186101     | 1.739E-10 | -1.11777  | down      | PREDICTED: probable 2-oxoglutarate-dependent dioxygenase At3g49630 isoform X1 [Sesamum indicum] |
| c20508.graph_c0 | 11.7511843    | 12.3604346    | 10.4986077    | 6.35810201     | 9.9760262      | 10.3973855     | 4.393E-13 | -1.396947 | down      | PREDICTED: cellulose synthase-like protein D3 isoform X1 [Sesamum indicum]                      |
| c20512.graph_c0 | 10.7333417    | 15.471489     | 7.17223993    | 5.9329527      | 5.23770332     | 5.45507582     | 0.0002604 | -2.015563 | down      | -                                                                                               |
| c20514.graph_c0 | 0             | 0.06217232    | 0             | 2.68933507     | 3.21272965     | 3.41123254     | 6E-12     | 6.217384  | up        | PREDICTED: uncharacterized protein LOC105156631 [Sesamum indicum]                               |
| c20517.graph_c0 | 0.68710763    | 0.91706089    | 0.44148026    | 13.6624306     | 19.3355068     | 16.8035367     | 8.948E-23 | 3.587944  | up        | PREDICTED: glyoxylate/hydroxypyruvate reductase HPR3 [Sesamum indicum]                          |
| c20522.graph_c0 | 44.3085878    | 46.2779976    | 42.5554404    | 28.8787051     | 25.5633917     | 23.0791949     | 3.554E-35 | -1.793879 | down      | PREDICTED: zinc finger protein GIS2-like isoform X2 [Sesamum indicum]                           |

| #ID             | 0 h-1<br>FPKM | 0 h-2<br>FPKM | 0 h-3<br>FPKM | 48 h-1<br>FPKM | 48 h-2<br>FPKM | 48 h-3<br>FPKM | FDR       | log2FC    | regulated | nr_annotation                                                                          |
|-----------------|---------------|---------------|---------------|----------------|----------------|----------------|-----------|-----------|-----------|----------------------------------------------------------------------------------------|
| c20528.graph_c0 | 0             | 0             | 0             | 8.9809686      | 7.45519373     | 6.29158844     | 2.99E-29  | Inf       | up        | PREDICTED: MLO-like protein 1 isoform X3 [Sesamum indicum]                             |
| c20541.graph_c0 | 1.47445508    | 0.32798478    | 0.63157772    | 6.48996223     | 9.59348097     | 12.3552349     | 1.257E-05 | 2.526273  | up        | Os06g0708300 [Oryza sativa Japonica Group]                                             |
| c20547.graph_c0 | 1.02782737    | 1.1079994     | 1.01599913    | 7.97582516     | 8.64232876     | 7.93938863     | 3.526E-08 | 1.943998  | up        | hypothetical protein MIMGU_mgv1a006570mg [Erythranthe guttata]                         |
| c20552.graph_c0 | 165.075907    | 173.46402     | 178.445608    | 9.73496267     | 6.70528023     | 4.34635971     | 2.03E-252 | -5.643387 | down      | hypothetical protein MIMGU_mgv1a010327mg [Erythranthe guttata]                         |
| c20557.graph_c0 | 0.28981944    | 0.72527412    | 0.74485891    | 3.738008       | 4.45496199     | 4.1575713      | 0.0004628 | 1.785144  | up        | PREDICTED: UDP-galactose transporter 2-like [Sesamum indicum]                          |
| c20560.graph_c0 | 0.22459248    | 0.67445212    | 0.28861023    | 5.7934587      | 5.04149075     | 7.36426388     | 2.675E-06 | 2.922355  | up        | unnamed protein product [Vitis vinifera]                                               |
| c20560.graph_c1 | 0.71046499    | 0.38791441    | 0.82997786    | 7.19979361     | 5.92534695     | 8.1005699      | 1.19E-07  | 2.440088  | up        | poly(A)-binding protein [Nicotiana tabacum]                                            |
| c20573.graph_c0 | 2.41971637    | 3.41583755    | 3.26888936    | 0.5144309      | 0.30276509     | 0.35601807     | 1.048E-14 | -3.965887 | down      | -                                                                                      |
| c20574.graph_c0 | 35.9055724    | 37.7164166    | 28.2536799    | 31.6900727     | 26.5632457     | 26.2354295     | 7.088E-12 | -1.281101 | down      | PREDICTED: LOW QUALITY PROTEIN: serrate RNA effector molecule [Pyrus x bretschneideri] |
| c20588.graph_c0 | 54.9067961    | 56.770743     | 52.3745457    | 8.28892922     | 7.28007005     | 6.02012359     | 4.18E-139 | -3.938479 | down      | PREDICTED: protein BPS1, chloroplastic-like [Sesamum indicum]                          |
| c20601.graph_c0 | 2182.4846     | 2192.99073    | 2245.65722    | 334.586698     | 120.404852     | 68.0260256     | 1.29E-124 | -4.653919 | down      | PREDICTED: chaperone protein dnaJ 20, chloroplastic-like [Nelumbo nucifera]            |
| c20602.graph_c0 | 0             | 0.04873447    | 0             | 18.3446547     | 18.8637483     | 21.0721875     | 4.164E-57 | 9.216737  | up        | PREDICTED: anthocyanidin 3-O-glucosyltransferase 2-like [Sesamum indicum]              |
| c20607.graph_c0 | 0             | 0             | 0             | 2.06046511     | 8.00364745     | 9.24333855     | 1.493E-05 | Inf       | up        | unnamed protein product [Coffea canephora]                                             |
| c20610.graph_c0 | 0             | 0             | 0             | 1.64170037     | 2.01379023     | 1.84518962     | 8.473E-10 | Inf       | up        | PREDICTED: CEN-like protein 1 [Sesamum indicum]                                        |
| c20611.graph_c0 | 4.8903839     | 3.27607259    | 3.57723794    | 0.97038106     | 2.79028861     | 4.56389307     | 0.0005098 | -1.529582 | down      | -                                                                                      |
| c20613.graph_c0 | 0             | 0             | 0             | 4.86956743     | 7.48013854     | 9.96569719     | 1.492E-08 | Inf       | up        | hypothetical protein M569_01187, partial [Genlisea aurea]                              |
| c20617.graph_c0 | 0.04115735    | 0.02059928    | 0             | 1.40292305     | 1.36572198     | 0.99527618     | 2.629E-11 | 4.933042  | up        | PREDICTED: putative disease resistance protein AtIg50180 [Sesamum indicum]             |
| c20625.graph_c0 | 3.98220196    | 2.75711443    | 2.04691487    | 26.7506764     | 20.0155        | 16.8930389     | 2.796E-05 | 1.852533  | up        | PREDICTED: probable anion transporter 3, chloroplastic [Sesamum indicum]               |
| c20635.graph_c0 | 1.31827676    | 0.92371777    | 1.41169819    | 26.9615123     | 35.9818289     | 44.1621242     | 3.668E-20 | 3.847328  | up        | PREDICTED: uncharacterized protein LOC105169209 [Sesamum indicum]                      |
| c20639.graph_c0 | 11.4129153    | 12.8556998    | 11.1951967    | 66.6720229     | 68.4083628     | 65.83637       | 5.179E-25 | 1.485235  | up        | PREDICTED: T-complex protein 1 subunit alpha [Sesamum indicum]                         |
| c20647.graph_c0 | 13.8998822    | 15.255741     | 15.4138214    | 8.12530336     | 6.81735675     | 6.36226454     | 4.494E-17 | -2.078976 | down      | PREDICTED: uncharacterized protein LOC105174183 [Sesamum indicum]                      |
| c20653.graph_c0 | 0             | 0             | 0             | 4.50758064     | 5.60171812     | 3.77942479     | 4.446E-13 | Inf       | up        | predicted protein [Hordeum vulgare subsp. vulgare]                                     |
| c20673.graph_c0 | 20.6115627    | 11.1616831    | 11.7236099    | 0              | 0              | 0              | 2.927E-18 | -Inf      | down      | -                                                                                      |

| #ID             | 0 h-1<br>FPKM | 0 h-2<br>FPKM | 0 h-3<br>FPKM | 48 h-1<br>FPKM | 48 h-2<br>FPKM | 48 h-3<br>FPKM | FDR       | log2FC    | regulated | nr_annotation                                                                                     |
|-----------------|---------------|---------------|---------------|----------------|----------------|----------------|-----------|-----------|-----------|---------------------------------------------------------------------------------------------------|
| c20674.graph_c0 | 0.04193356    | 0.1679022     | 0.10777257    | 1.77706877     | 1.92351472     | 2.37183765     | 1.574E-07 | 3.234234  | up        | PREDICTED: probable transcription factor GLK1 [Sesamum indicum]                                   |
| c20676.graph_c0 | 3.89879309    | 2.6017981     | 3.24183167    | 0              | 0              | 0              | 3.789E-25 | -Inf      | down      | -                                                                                                 |
| c20678.graph_c0 | 8.43904527    | 6.99935358    | 7.74607663    | 0.2221314      | 0.11766064     | 0.29647677     | 4.024E-26 | -6.201524 | down      | PREDICTED: homeobox-leucine zipper protein HAT22-like [Sesamum indicum]                           |
| c20681.graph_c0 | 0.63210801    | 0.2711747     | 0.46416218    | 3.9931826      | 5.19973485     | 4.73747982     | 2.76E-05  | 2.327947  | up        | PREDICTED: ras-related protein RABC2a-like [Sesamum indicum]                                      |
| c20682.graph_c0 | 15.0215957    | 11.5907415    | 10.2549022    | 6.19866221     | 4.42872555     | 3.71977764     | 6.372E-10 | -2.36752  | down      | PREDICTED: protein MKS1 [Sesamum indicum]                                                         |
| c20683.graph_c0 | 1.18632972    | 0.86780136    | 0.70360646    | 13.0730563     | 10.7766397     | 11.1834911     | 2.594E-14 | 2.657695  | up        | PREDICTED: GDSL esterase/lipase At4g10955-like [Sesamum indicum]                                  |
| c20685.graph_c0 | 164.27113     | 165.182303    | 166.309129    | 11.4151984     | 9.66632586     | 8.76438503     | 6.83E-218 | -5.067463 | down      | PREDICTED: F-box/kelch-repeat protein At5g43190 [Sesamum indicum]                                 |
| c20709.graph_c0 | 23.8910808    | 23.6049948    | 22.6277628    | 20.3388907     | 21.6329475     | 22.1956366     | 1.157E-12 | -1.146312 | down      | PREDICTED: ABSCISIC ACID-INSENSITIVE 5-like protein 2 [Sesamum indicum]                           |
| c20712.graph_c0 | 1.25713176    | 1.80893648    | 1.96884686    | 13.8254369     | 16.6784625     | 17.0035221     | 3.848E-17 | 2.213684  | up        | PREDICTED: 8-hydroxygeraniol dehydrogenase [Sesamum indicum]                                      |
| c20713.graph_c0 | 234.818836    | 248.452814    | 226.559352    | 89.1981326     | 44.1057771     | 26.3340703     | 1.07E-102 | -3.15057  | down      | PREDICTED: uncharacterized protein At1g76070 [Sesamum indicum]                                    |
| c20731.graph_c0 | 1.31374285    | 1.08635257    | 1.68821158    | 6.89347976     | 7.74877881     | 9.41136751     | 6.579E-05 | 1.531934  | up        | hypothetical protein MIMGU_mgv1a005057mg [Erythranthe guttata]                                    |
| c20743.graph_c0 | 13.3143983    | 12.5536453    | 13.7826761    | 57.0249385     | 58.639039      | 60.056184      | 1.195E-14 | 1.129114  | up        | PREDICTED: COP9 signalosome complex subunit 1-like [Sesamum indicum]                              |
| c20753.graph_c0 | 2.63028647    | 3.92706758    | 2.17696349    | 1.64284167     | 2.74111668     | 2.08305166     | 0.0006487 | -1.455111 | down      | -                                                                                                 |
| c20754.graph_c0 | 0.06319426    | 0.06325754    | 0             | 1.86299745     | 1.91194427     | 2.84914425     | 1.983E-09 | 4.70641   | up        | PREDICTED: ATP-dependent 6-phosphofructokinase 6-like [Sesamum indicum]                           |
| c20761.graph_c0 | 0.33520481    | 0.16777024    | 0.28716764    | 5.32701628     | 8.0424237      | 10.0294532     | 5.189E-12 | 3.861536  | up        | PREDICTED: inorganic phosphate transporter 2-1, chloroplastic-like [Sesamum indicum]              |
| c20762.graph_c0 | 21.3045264    | 10.9775737    | 12.7460876    | 0              | 0              | 0              | 4.655E-22 | -Inf      | down      | cytochrome c oxidase subunit I [Lingulodinium polyedrum]                                          |
| c20763.graph_c0 | 0.68363213    | 1.12710982    | 0.98184662    | 14.8930714     | 14.9924579     | 15.7241097     | 5.505E-24 | 3.010098  | up        | PREDICTED: uncharacterized protein LOC105157658 [Sesamum indicum]                                 |
| c20780.graph_c0 | 18.9011012    | 16.6289306    | 16.6035784    | 147.19365      | 135.469311     | 149.431576     | 8.514E-41 | 2.035413  | up        | PREDICTED: NADH dehydrogenase [ubiquinone] 1 beta subcomplex subunit 3-B [Sesamum indicum]        |
| c20797.graph_c0 | 106.189933    | 109.450259    | 111.044639    | 558.811636     | 548.810644     | 540.256513     | 2.651E-20 | 1.317328  | up        | PREDICTED: 40S ribosomal protein S3-3-like [Sesamum indicum]                                      |
| c20802.graph_c0 | 0.31497287    | 0.39411034    | 0.2023763     | 1.70476962     | 1.26804024     | 2.06555746     | 0.0074232 | 1.455724  | up        | PREDICTED: pentatricopeptide repeat-containing protein At1g09220, mitochondrial [Sesamum indicum] |

| #ID             | 0 h-1<br>FPKM | 0 h-2<br>FPKM | 0 h-3<br>FPKM | 48 h-1<br>FPKM | 48 h-2<br>FPKM | 48 h-3<br>FPKM | FDR       | log2FC    | regulated | nr_annotation                                                                                                                        |
|-----------------|---------------|---------------|---------------|----------------|----------------|----------------|-----------|-----------|-----------|--------------------------------------------------------------------------------------------------------------------------------------|
| c20804.graph_c0 | 20.7643723    | 21.2505042    | 15.9301735    | 9.32681804     | 11.191329      | 8.4259713      | 4.266E-22 | -2.017518 | down      | PREDICTED: LOW QUALITY PROTEIN: probable LRR receptor-like serine/threonine-protein kinase At1g56140 [Sesamum indicum]               |
| c20809.graph_c0 | 2.52116588    | 2.00154759    | 1.89919191    | 0.16018362     | 0.67878048     | 0.35632605     | 2.783E-10 | -3.459919 | down      | -                                                                                                                                    |
| c20810.graph_c0 | 27.3130531    | 30.9896517    | 30.8597821    | 238.457961     | 236.74753      | 246.948594     | 8.632E-46 | 1.999369  | up        | PREDICTED: adenylate kinase [Sesamum indicum]                                                                                        |
| c20811.graph_c0 | 14.046012     | 12.8267369    | 11.3997989    | 11.5779864     | 12.5059721     | 9.29202044     | 0.0026523 | -1.212392 | down      | -                                                                                                                                    |
| c20815.graph_c0 | 39.8855724    | 40.3745011    | 40.1700804    | 367.547268     | 433.046863     | 421.083767     | 6.307E-56 | 2.322256  | up        | PREDICTED: tubulin alpha-3 chain [Sesamum indicum]                                                                                   |
| c20826.graph_c0 | 3.86244748    | 2.28653046    | 2.56175377    | 0              | 0              | 0              | 1.891E-24 | -Inf      | down      | FRUCTOSE-BISPHOSPHATE AMIDOLASE A [KOZEZIA ANOMYCTIS CSE551]                                                                         |
| c20831.graph_c0 | 6.59956081    | 4.39115957    | 5.9863743     | 28.1823373     | 28.9085683     | 28.6406432     | 4.343E-13 | 1.318072  | up        | PREDICTED: isocitrate dehydrogenase [NADP] isoform X1 [Sesamum indicum]                                                              |
| c20835.graph_c0 | 0.3279295     | 0.29543209    | 0.25284144    | 1.78244929     | 2.01630847     | 1.88170993     | 0.0012401 | 1.679793  | up        | unnamed protein product [Coffea canephora]                                                                                           |
| c20837.graph_c0 | 2.10811534    | 1.65803495    | 1.74150751    | 0.52715048     | 0.73480528     | 1.28373037     | 4.118E-07 | -2.139368 | down      | PREDICTED: pentatricopeptide repeat-containing protein At1g71060, mitochondrial [Sesamum indicum]                                    |
| c20841.graph_c0 | 0.13293002    | 0.13306313    | 0.17082034    | 5.26594372     | 4.41100885     | 3.59592946     | 2.913E-08 | 3.910238  | up        | Chain O, Localization Of The Small Subunit Ribosomal Proteins Into A 5.5 A Cryo-em Map Of Triticum Aestivum Translating 80s Ribosome |
| c20843.graph_c0 | 1.0564882     | 1.09822096    | 1.25319615    | 5.57779116     | 5.98830873     | 5.42941517     | 0.0006865 | 1.298393  | up        | PREDICTED: aldo-keto reductase [Sesamum indicum]                                                                                     |
| c20853.graph_c0 | 0.02622689    | 0.05250631    | 0.10110779    | 2.6336499      | 2.96920913     | 2.51539893     | 4.818E-14 | 4.465953  | up        | PREDICTED: B3 domain-containing protein Os01g0234100-like [Sesamum indicum]                                                          |
| c20868.graph_c0 | 2.49157738    | 2.36280535    | 4.04434809    | 0.36243215     | 0.38395291     | 0.2149933      | 7.809E-09 | -4.230931 | down      | -                                                                                                                                    |
| c20871.graph_c0 | 196.431259    | 208.112584    | 192.338467    | 95.7817533     | 98.3687907     | 97.9429347     | 4.749E-42 | -2.048459 | down      | PREDICTED: orancpoint-binding protein [Sesamum indicum]                                                                              |
| c20872.graph_c0 | 1.89138441    | 1.19575475    | 2.04674008    | 36.8669267     | 84.0384908     | 92.8629789     | 5.213E-08 | 4.346     | up        | hypothetical protein MIMGU_mgv1a013356mg [Erythranthe guttata]                                                                       |
| c20878.graph_c0 | 0.02198346    | 0.11002737    | 0.02824962    | 2.20753314     | 1.75932405     | 1.94622907     | 5.317E-12 | 4.196804  | up        | PREDICTED: protein CHUP1, chloroplastic-like [Sesamum indicum]                                                                       |
| c20880.graph_c0 | 0             | 0             | 0             | 31.6439177     | 30.9076326     | 23.0755165     | 1.142E-58 | Inf       | up        | cytochrome c oxidase subunit I [Lingulodinium polyedrum]                                                                             |
| c20899.graph_c0 | 0.44279184    | 0.18995796    | 0.08128644    | 6.4685841      | 8.27260529     | 7.72612953     | 4.221E-13 | 3.966695  | up        | PREDICTED: polyadenylate-binding protein 8-like [Sesamum indicum]                                                                    |
| c20900.graph_c0 | 0             | 0             | 0             | 86.9546207     | 100.492229     | 95.9226506     | 2.24E-268 | Inf       | up        | PREDICTED: raucaffricine-O-beta-D-glucosidase-like [Sesamum indicum]                                                                 |
| c20914.graph_c0 | 59.4792406    | 60.1244276    | 57.9388557    | 10.5639802     | 11.8383696     | 10.8065338     | 7.46E-113 | -3.437122 | down      | PREDICTED: uncharacterized protein LOC105168301 [Sesamum indicum]                                                                    |
| c20941.graph_c0 | 0.2752768     | 0.18370163    | 0.35374158    | 3.71950981     | 2.73139259     | 3.08394309     | 1.588E-06 | 2.535656  | up        | PREDICTED: protein tesmin/TSO1-like CXC 2 isoform X3 [Sesamum indicum]                                                               |
| c20944.graph_c0 | 1673.56929    | 1658.2327     | 1660.80325    | 101.068551     | 145.275835     | 196.140168     | 3.62E-142 | -4.521977 | down      | PREDICTED: 18 kDa seed maturation protein-like [Nicotiana glauca]                                                                    |

| #ID             | 0 h-1<br>FPKM | 0 h-2<br>FPKM | 0 h-3<br>FPKM | 48 h-1<br>FPKM | 48 h-2<br>FPKM | 48 h-3<br>FPKM | FDR       | log2FC    | regulated | nr_annotation                                                                                     |
|-----------------|---------------|---------------|---------------|----------------|----------------|----------------|-----------|-----------|-----------|---------------------------------------------------------------------------------------------------|
| c20982.graph_c0 | 7.41297614    | 7.94902913    | 6.05740963    | 32.9933501     | 32.7953662     | 34.0069909     | 1.611E-15 | 1.204847  | up        | PREDICTED: phosphatidylinositol 4-phosphate 5-kinase 1-like [Sesamum indicum]                     |
| c20998.graph_c0 | 0.29132832    | 0.19441336    | 0.43676317    | 1.78927103     | 3.22237669     | 3.02495695     | 6.482E-05 | 2.089322  | up        | hypothetical protein MIMGU_mgv1a024355mg [Erythranthe guttata]                                    |
| c21005.graph_c0 | 0.70997679    | 0.95435208    | 0.86021409    | 3.68151869     | 5.97886822     | 5.63702483     | 7.149E-07 | 1.57271   | up        | PREDICTED: probable LRR receptor-like serine/threonine-protein kinase At2g24230 [Sesamum indicum] |
| c21008.graph_c0 | 0.1666016     | 0.12507632    | 0.05352241    | 1.22787409     | 2.23572201     | 1.87782888     | 2.068E-06 | 2.934224  | up        | hypothetical protein MIMGU_mgv1a020944mg, partial [Erythranthe guttata]                           |
| c21009.graph_c0 | 480.2178      | 457.952132    | 475.338859    | 60.3378977     | 37.4630804     | 39.9160828     | 4.48E-158 | -4.367761 | down      | PREDICTED: histone H1-like [Sesamum indicum]                                                      |
| c21011.graph_c0 | 0.56152507    | 0.71822272    | 0.52114251    | 2.75900543     | 3.01417019     | 2.86410418     | 0.0056345 | 1.244887  | up        | PREDICTED: 1a-related protein 1B-like [Sesamum indicum]                                           |
| c21017.graph_c0 | 1.98691854    | 1.98890814    | 2.13640875    | 0.33621042     | 0.39574908     | 0.69803536     | 7.788E-11 | -3.121266 | down      | PREDICTED: uncharacterized protein LOC105175392 [Sesamum indicum]                                 |
| c21037.graph_c0 | 0.65856495    | 0.3296122     | 0.56418802    | 24.1674005     | 37.4930988     | 35.7200461     | 5.374E-27 | 4.945644  | up        | PREDICTED: defensin J1-2-like [Sesamum indicum]                                                   |
| c21056.graph_c0 | 320.714039    | 178.609573    | 216.018971    | 0              | 0              | 0              | 3.647E-54 | -Inf      | down      | --                                                                                                |
| c21058.graph_c1 | 5.73341899    | 4.97393879    | 7.04021838    | 0.3521333      | 0.24869502     | 0.3133261      | 3.834E-19 | -5.294432 | down      | -                                                                                                 |
| c21062.graph_c0 | 28.2441686    | 28.6066406    | 25.2262251    | 3.44477716     | 2.15049433     | 1.25889761     | 1.38E-94  | -4.584128 | down      | -                                                                                                 |
| c21075.graph_c0 | 0             | 0.0336202     | 0             | 1.42333842     | 2.78625282     | 2.31269889     | 9.341E-12 | 6.583675  | up        | PREDICTED: uncharacterized protein LOC105162896 [Sesamum indicum]                                 |
| c21084.graph_c0 | 0.03776457    | 0             | 0             | 3.4791188      | 4.38598835     | 5.04598934     | 2.244E-19 | 7.415967  | up        | PREDICTED: 65-kDa microtubule-associated protein 3 [Sesamum indicum]                              |
| c21092.graph_c0 | 0             | 0             | 0             | 1.82943165     | 3.31085422     | 1.83129445     | 1.007E-07 | Inf       | up        | PREDICTED: uncharacterized protein LOC105166030 [Sesamum indicum]                                 |
| c21098.graph_c0 | 46.04187      | 48.0986108    | 38.6839276    | 55.1778541     | 31.9767128     | 24.2704736     | 9.107E-06 | -1.255196 | down      | PREDICTED: receptor-like protein kinase HAIKU2 [Sesamum indicum]                                  |
| c21098.graph_c1 | 67.1025111    | 66.9482656    | 50.6952969    | 72.4847221     | 42.8203565     | 29.8001496     | 1.186E-05 | -1.34903  | down      | unnamed protein product [Coffea canephora]                                                        |
| c21099.graph_c0 | 12.0112033    | 7.30823829    | 6.80950228    | 0              | 0              | 0              | 8.763E-21 | -Inf      | down      | --                                                                                                |
| c21103.graph_c0 | 4.69730471    | 5.11689144    | 5.5627933     | 28.5103476     | 27.1919197     | 27.6333659     | 7.54E-13  | 1.420017  | up        | hypothetical protein MIMGU_mgv1a010545mg [Erythranthe guttata]                                    |
| c21104.graph_c0 | 3.28913351    | 4.11553386    | 2.4201076     | 72.3573917     | 101.920411     | 112.088906     | 5.17E-27  | 3.844915  | up        | PREDICTED: DELLA protein GAI-like [Sesamum indicum]                                               |
| c21106.graph_c0 | 2.05893627    | 2.18223315    | 1.75090673    | 53.3621893     | 59.6927096     | 65.848424      | 2.24E-109 | 3.88163   | up        | PREDICTED: GDP-mannose 4,6 dehydratase 1 [Sesamum indicum]                                        |
| c21108.graph_c0 | 0.43017333    | 0.28706939    | 0.3685265     | 29.0622732     | 39.6045051     | 35.7330388     | 1.438E-29 | 5.565148  | up        | -                                                                                                 |
| c21116.graph_c0 | 6.39291694    | 5.11945478    | 7.11979786    | 0              | 0.20797625     | 0.34936705     | 1.474E-17 | -6.11047  | down      | -                                                                                                 |
| c21117.graph_c0 | 1.00561267    | 1.16555958    | 0.47609287    | 7.46024761     | 8.16150316     | 5.9439048      | 3.06E-06  | 2.016531  | up        | PREDICTED: BURP domain-containing protein 17-like [Sesamum indicum]                               |



| #ID             | 0 h-1<br>FPKM | 0 h-2<br>FPKM | 0 h-3<br>FPKM | 48 h-1<br>FPKM | 48 h-2<br>FPKM | 48 h-3<br>FPKM | FDR       | log2FC    | regulated | nr_annotation                                                                             |
|-----------------|---------------|---------------|---------------|----------------|----------------|----------------|-----------|-----------|-----------|-------------------------------------------------------------------------------------------|
| c21119.graph_c0 | 1.40734402    | 0.37072454    | 0.95183831    | 39.919695      | 43.5190188     | 40.9849668     | 1.818E-53 | 4.492692  | up        | Signal peptidase complex catalytic subunit SEC11C [Gossypium arboreum]                    |
| c21133.graph_c0 | 0             | 0             | 0             | 1.37634852     | 2.13850906     | 1.46959996     | 1.409E-11 | Inf       | up        | --                                                                                        |
| c21136.graph_c0 | 15.9021166    | 18.8751465    | 20.4348495    | 14.7079725     | 15.3359384     | 12.417255      | 1.371E-11 | -1.397579 | down      | Arabinoxylan arabinofuranohydrolase [Gossypium arboreum]                                  |
| c21139.graph_c0 | 5.78164929    | 4.70010176    | 5.40338054    | 4.90677412     | 5.9162952      | 5.11283699     | 0.0001021 | -1.015338 | down      | PREDICTED: zinc finger CCCH domain-containing protein 11-like [Sesamum indicum]           |
| c21144.graph_c0 | 30.1080582    | 33.1599796    | 26.6440692    | 13.1003001     | 14.5371992     | 10.4192789     | 1.33E-46  | -2.255794 | down      | hypothetical protein MIMGU_mgv1a000612mg [Erythranthe guttata]                            |
| c21148.graph_c0 | 158.91922     | 149.175399    | 177.046655    | 107.761088     | 83.7739867     | 75.332667      | 3.051E-24 | -1.875196 | down      | PREDICTED: CBS domain-containing protein CBSX3, mitochondrial-like [Sesamum indicum]      |
| c21151.graph_c0 | 1.3294581     | 1.00956433    | 1.47276404    | 0.2956374      | 0.26845027     | 1.27770242     | 6.834E-05 | -2.080929 | down      | -                                                                                         |
| c21154.graph_c0 | 1.35307603    | 0.84651933    | 1.04325376    | 5.85874689     | 7.7252759      | 9.12288607     | 8.487E-08 | 1.785467  | up        | PREDICTED: uncharacterized protein At5g39865-like [Sesamum indicum]                       |
| c21157.graph_c0 | 0             | 0             | 0.13961939    | 2.60247917     | 2.33285556     | 3.11724851     | 6.158E-10 | 4.799717  | up        | PREDICTED: transcription factor PRE6-like [Solanum lycopersicum]                          |
| c21162.graph_c0 | 0             | 0.1213478     | 0.05192691    | 0.78177172     | 1.77469788     | 0.96061226     | 0.0005653 | 3.313074  | up        | PREDICTED: vegetative incompatibility protein HET-E-1-like [Sesamum indicum]              |
| c21165.graph_c0 | 15.341046     | 14.6294772    | 13.1522885    | 6.27211782     | 6.15728143     | 6.23199687     | 3.931E-42 | -2.22407  | down      | PREDICTED: protein PHOTOPERIOD-INDEPENDENT EARLY FLOWERING 1 isoform X2 [Sesamum indicum] |
| c21171.graph_c0 | 2.97257529    | 2.04569191    | 3.46176347    | 0.77021163     | 1.72255231     | 2.96976194     | 0.0010093 | -1.670625 | down      | -                                                                                         |
| c21182.graph_c0 | 4.92426671    | 4.39470631    | 4.42189043    | 0.81985946     | 1.91079171     | 2.09125058     | 2.206E-10 | -2.541572 | down      | -                                                                                         |
| c21184.graph_c0 | 62.6680933    | 76.622035     | 75.1528136    | 25.8229991     | 19.2945476     | 20.5846367     | 2.507E-39 | -2.719828 | down      | PREDICTED: uncharacterized protein LOC105158345 [Sesamum indicum]                         |
| c21193.graph_c0 | 1.41290041    | 1.64522383    | 1.18571949    | 1.03601193     | 1.06938725     | 0.82728978     | 0.0002133 | -1.546907 | down      | hypothetical protein MIMGU_mgv1a002822mg [Erythranthe guttata]                            |
| c21195.graph_c0 | 0.36810603    | 0.22108478    | 0.09460616    | 1.76344108     | 3.161488       | 3.31924846     | 5.092E-06 | 2.574621  | up        | PREDICTED: glucan endo-1,3-beta-glucosidase 13 [Sesamum indicum]                          |
| c21196.graph_c0 | 0             | 0             | 0             | 1.2648423      | 2.21382556     | 1.12544907     | 5.374E-07 | Inf       | up        | predicted protein [Hordeum vulgare subsp. vulgare]                                        |
| c21198.graph_c0 | 7.15436127    | 6.59478587    | 6.48184513    | 23.3295224     | 31.8981668     | 29.6609827     | 1.756E-07 | 1.047088  | up        | KECname: gum=kas-related protein KAS11C [Lotus japonicus]                                 |
| c21208.graph_c0 | 3.53909575    | 3.5848139     | 2.05737345    | 0.38814831     | 0.69903333     | 0.48352085     | 1.578E-12 | -3.56769  | down      | -                                                                                         |
| c21212.graph_c0 | 0.33760743    | 0.50691824    | 0.54229864    | 9.33077958     | 14.6075815     | 15.2442603     | 2.295E-18 | 3.791287  | up        | PREDICTED: protein LUTEIN DEFICIENT 5, chloroplastic [Sesamum indicum]                    |
| c21224.graph_c0 | 9.21333427    | 6.31781671    | 9.78856241    | 80.067193      | 93.3885937     | 95.8038125     | 1.113E-44 | 2.388083  | up        | PREDICTED: elongation factor 1-gamma 2-like [Sesamum indicum]                             |
| c21231.graph_c0 | 0             | 0.07137492    | 0.18325568    | 1.77361516     | 3.89704041     | 4.61755615     | 8.095E-06 | 4.285122  | up        | PREDICTED: probable xyloglucan glycosyltransferase 5 [Sesamum indicum]                    |

| #ID             | 0 h-1<br>FPKM | 0 h-2<br>FPKM | 0 h-3<br>FPKM | 48 h-1<br>FPKM | 48 h-2<br>FPKM | 48 h-3<br>FPKM | FDR       | log2FC    | regulated | nr_annotation                                                                                                |
|-----------------|---------------|---------------|---------------|----------------|----------------|----------------|-----------|-----------|-----------|--------------------------------------------------------------------------------------------------------------|
| c21236.graph_c0 | 7.55570237    | 7.80085784    | 8.38768143    | 4.26394913     | 6.71779359     | 5.70726827     | 2.608E-10 | -1.534289 | down      | PREDICTED: probable purine permease 9 [Sesamum indicum]                                                      |
| c21237.graph_c0 | 3.12424179    | 2.38667729    | 2.64129894    | 15.3001993     | 15.0853302     | 17.0849278     | 1.224E-09 | 1.524524  | up        | unnamed protein product [Coffea canephora]                                                                   |
| c21242.graph_c0 | 0.02327536    | 0             | 0             | 18.6337761     | 20.308127      | 24.7272355     | 1.365E-90 | 10.41832  | up        | PREDICTED: probable inactive receptor kinase At4g23740 [Sesamum indicum]                                     |
| c21243.graph_c0 | 8.39005168    | 8.15849724    | 6.1608849     | 0.29445573     | 1.16977552     | 0.45850864     | 2.838E-26 | -4.594366 | down      | PREDICTED: uncharacterized protein DDB_G0284459-like isoform X1 [Sesamum indicum]                            |
| c21247.graph_c0 | 0.43096847    | 0.21570001    | 0.46150962    | 12.936765      | 14.7915143     | 16.8102629     | 5.307E-39 | 4.304732  | up        | PREDICTED: uncharacterized protein LOC105161548 [Sesamum indicum]                                            |
| c21248.graph_c0 | 0.19188993    | 0.12805472    | 0.08219539    | 6.21681683     | 7.36629104     | 8.02225586     | 2.456E-24 | 4.73344   | up        | PREDICTED: phosphatidylinositol/phosphatidylcholine transfer protein SFH13-like isoform X1 [Sesamum indicum] |
| c21250.graph_c0 | 0.06446166    | 0             | 0.08283578    | 2.34575815     | 4.37242327     | 7.29213484     | 4.739E-06 | 5.531706  | up        | hypothetical protein MIMGU_mgv1a007352mg [Erythranthe guttata]                                               |
| c21251.graph_c0 | 8.07500501    | 8.16473829    | 8.28039788    | 4.05775708     | 4.37830718     | 4.34605389     | 1.4E-08   | -1.958888 | down      | PREDICTED: metal tolerance protein 1-like isoform X1 [Sesamum indicum]                                       |
| c21257.graph_c0 | 8.55112898    | 10.3286946    | 9.66991458    | 262.280145     | 244.972208     | 269.124615     | 4.03E-132 | 3.747807  | up        | PREDICTED: tubulin beta chain-like [Sesamum indicum]                                                         |
| c21269.graph_c0 | 0             | 0.4811318     | 0.61765492    | 9.96314822     | 12.6656969     | 19.3063253     | 4.524E-08 | 4.216031  | up        | hypothetical protein MIMGU_mgv1a022779mg, partial [Erythranthe guttata]                                      |
| c21270.graph_c0 | 1.10116656    | 1.03987661    | 1.2281502     | 0.80391681     | 1.2369237      | 0.86860328     | 0.0027703 | -1.236248 | down      | PREDICTED: pentatricopeptide repeat-containing protein At3g24000, mitochondrial [Sesamum indicum]            |
| c21292.graph_c0 | 0.28082885    | 0.52708136    | 0.45109524    | 173.179265     | 130.804774     | 112.484208     | 5.288E-33 | 7.357139  | up        | PREDICTED: cytochrome P450 11D95-like [Sesamum indicum]                                                      |
| c21295.graph_c0 | 11.4378769    | 11.8433355    | 10.9789635    | 7.63635612     | 7.57005803     | 7.00356203     | 1.733E-22 | -1.641394 | down      | PREDICTED: uncharacterized protein LOC105161140 [Sesamum indicum]                                            |
| c21296.graph_c0 | 1.60040871    | 1.28160902    | 1.79217003    | 1.70609246     | 1.53963541     | 1.23694659     | 0.0046984 | -1.076179 | down      | unnamed protein product [Coffea canephora]                                                                   |
| c21299.graph_c0 | 0.57942761    | 1.09557032    | 0.66185548    | 7.35466738     | 3.95852284     | 5.43585724     | 0.001086  | 1.835159  | up        | PREDICTED: ethylene-responsive transcription factor-like protein At4g13040 [Sesamum indicum]                 |
| c21305.graph_c0 | 5.58324641    | 2.55142567    | 3.04144581    | 0              | 0              | 0              | 7.982E-13 | -Inf      | down      | hypothetical protein M569_16047 [Genlisea aurea]                                                             |
| c21328.graph_c0 | 34.8213697    | 28.3206934    | 23.9715207    | 244.03499      | 214.5276       | 168.972294     | 1.656E-08 | 1.838952  | up        | F-box/WD repeat-containing protein 4 [Theobroma cacao]                                                       |
| c21337.graph_c0 | 1.9840766     | 2.15629735    | 2.29465528    | 13.6828435     | 14.4676507     | 14.6377757     | 1.454E-14 | 1.713352  | up        | PREDICTED: xylem cysteine proteinase 2-like [Sesamum indicum]                                                |
| c21343.graph_c0 | 2.92448309    | 2.92741152    | 2.69732914    | 0.97774279     | 1.28899546     | 1.50798207     | 1.084E-11 | -2.202126 | down      | PREDICTED: putative pentatricopeptide repeat-containing protein At5g09950 [Sesamum indicum]                  |
| c21346.graph_c0 | 0             | 0             | 0             | 2.20364496     | 4.16874041     | 4.20169293     | 3.09E-12  | Inf       | up        | PREDICTED: transcription factor MYB28-like [Sesamum indicum]                                                 |
| c21350.graph_c0 | 108.562925    | 118.51188     | 111.813428    | 28.2606354     | 35.6706153     | 36.3451654     | 1.152E-77 | -2.778679 | down      | PREDICTED: ethylene-responsive transcription factor 3-like [Sesamum indicum]                                 |
| c21351.graph_c0 | 0             | 0             | 0.05402426    | 10.1087506     | 7.67272857     | 5.85862043     | 1.81E-16  | 7.731333  | up        | PREDICTED: uncharacterized protein LOC105175340 [Sesamum indicum]                                            |

| #ID             | 0 h-1<br>FPKM | 0 h-2<br>FPKM | 0 h-3<br>FPKM | 48 h-1<br>FPKM | 48 h-2<br>FPKM | 48 h-3<br>FPKM | FDR       | log2FC    | regulated | nr_annotation                                                                      |
|-----------------|---------------|---------------|---------------|----------------|----------------|----------------|-----------|-----------|-----------|------------------------------------------------------------------------------------|
| c21361.graph_c0 | 2.59261096    | 2.68318018    | 2.31518503    | 20.2008928     | 23.1587457     | 23.0176161     | 4.183E-19 | 2.109709  | up        | PREDICTED: cyclin-D3-3-like [Sesamum indicum]                                      |
| c21372.graph_c0 | 2.71048774    | 2.65783042    | 2.41683384    | 0.35672544     | 0.72882132     | 1.22430402     | 3.163E-13 | -2.783624 | down      | PREDICTED: galactose oxidase-like [Sesamum indicum]                                |
| c21379.graph_c0 | 0.26965436    | 0             | 0.11550551    | 1.90457772     | 2.71946712     | 2.13677271     | 9.376E-07 | 3.116217  | up        | PREDICTED: 60S ribosomal protein L9-like [Musa acuminata subsp. malaccensis]       |
| c21382.graph_c0 | 1.58291541    | 2.21830065    | 1.52558173    | 2.18742739     | 0.61795042     | 1.29757316     | 0.004671  | -1.373983 | down      | -                                                                                  |
| c21391.graph_c0 | 19.9278375    | 9.84208249    | 10.7170296    | 0              | 0              | 0              | 3.869E-17 | -Inf      | down      | -                                                                                  |
| c21397.graph_c0 | 0.34141048    | 0.57835013    | 0.33748152    | 9.29072052     | 9.99617921     | 10.7210416     | 4.107E-29 | 3.559963  | up        | hypothetical protein MIMGU_mgv1a003249mg [Erythranthe guttata]                     |
| c21401.graph_c0 | 11.997393     | 4.52710613    | 3.14799933    | 4318.80181     | 6786.24014     | 6748.86841     | 2.874E-67 | 8.81078   | up        | hypothetical protein MIMGU_mgv1a011768mg [Erythranthe guttata]                     |
| c21405.graph_c0 | 0.36351466    | 0.7641452     | 0.14013922    | 4.85595456     | 2.87370964     | 2.68187535     | 0.0048519 | 2.041328  | up        | PREDICTED: uncharacterized protein LOC105157791 isoform X1 [Sesamum indicum]       |
| c21408.graph_c0 | 384.755952    | 388.145761    | 389.462542    | 12.1668974     | 12.7331179     | 13.6473618     | 3.57E-247 | -5.933206 | down      | PREDICTED: zinc finger CCCH domain-containing protein 20-like [Sesamum indicum]    |
| c21417.graph_c0 | 10.1092089    | 11.3741289    | 9.45725416    | 14.1561592     | 5.5251126      | 3.34790158     | 0.0005301 | -1.418464 | down      | PREDICTED: uncharacterized protein LOC105168262 [Sesamum indicum]                  |
| c21418.graph_c0 | 222.645538    | 238.626209    | 226.084445    | 1071.1658      | 1001.28271     | 1013.98902     | 2.963E-14 | 1.150727  | up        | PREDICTED: heat shock cognate 70 kDa protein 2 [Sesamum indicum]                   |
| c21437.graph_c0 | 287.072556    | 269.564162    | 293.561768    | 68.6805073     | 48.8736937     | 37.3788801     | 3.61E-111 | -3.464918 | down      | PREDICTED: 7-deoxyloganetic acid glucosyltransferase-like [Sesamum indicum]        |
| c21448.graph_c0 | 6.03100089    | 4.78406945    | 5.26420183    | 0.36691566     | 0.16658685     | 0.13991972     | 2.425E-31 | -5.576175 | down      | PREDICTED: ethylene-responsive transcription factor ERF053-like [Nelumbo nucifera] |
| c21454.graph_c1 | 2.29956846    | 2.79014682    | 1.52229154    | 16.4987182     | 17.0023262     | 16.2227654     | 1.542E-08 | 1.897866  | up        | PREDICTED: calcium-dependent protein kinase 10-like [Sesamum indicum]              |
| c21469.graph_c0 | 30.2881285    | 28.2812489    | 32.7678562    | 316.091474     | 336.262657     | 363.591963     | 7.657E-67 | 2.455134  | up        | PREDICTED: 40S ribosomal protein S3a [Sesamum indicum]                             |
| c21484.graph_c0 | 0.11535308    | 0.28867146    | 0.29646654    | 2.2848217      | 2.64565355     | 2.45853655     | 2.737E-05 | 2.373687  | up        | PREDICTED: uncharacterized protein LOC105160233 [Sesamum indicum]                  |
| c21504.graph_c0 | 4.3992891     | 2.83094635    | 4.71105056    | 2.02645603     | 2.45346794     | 2.66176096     | 0.0002054 | -1.765585 | down      | PREDICTED: EPIDERMAL PATTERNING FACTOR-like protein 6 [Vitis vinifera]             |
| c21505.graph_c0 | 0             | 0.08396257    | 0.05389365    | 5.83421885     | 7.28579632     | 7.3571398      | 3.38E-23  | 6.187363  | up        | PREDICTED: uncharacterized protein LOC105160466 [Sesamum indicum]                  |
| c21513.graph_c0 | 3.98588123    | 5.98480872    | 5.44502515    | 2.61344367     | 4.41578431     | 4.1504447      | 3.141E-06 | -1.49139  | down      | PREDICTED: cyclic nucleotide-gated ion channel 2-like isoform X1 [Sesamum indicum] |
| c21528.graph_c0 | 603.345527    | 616.451107    | 586.232373    | 638.560972     | 570.219182     | 588.415261     | 2.324E-10 | -1.022116 | down      | PREDICTED: thiamine thiazole synthase 2, chloroplastic-like [Populus euphratica]   |
| c21536.graph_c0 | 0.38474834    | 0.26663096    | 0.22819239    | 18.3498765     | 14.7601318     | 13.9015162     | 3.391E-30 | 4.731798  | up        | PREDICTED: protein TRANSPORT INHIBITOR RESPONSE 1-like [Sesamum indicum]           |

| #ID             | 0 h-1<br>FPKM | 0 h-2<br>FPKM | 0 h-3<br>FPKM | 48 h-1<br>FPKM | 48 h-2<br>FPKM | 48 h-3<br>FPKM | FDR       | log2FC    | regulated | nr_annotation                                                                                              |
|-----------------|---------------|---------------|---------------|----------------|----------------|----------------|-----------|-----------|-----------|------------------------------------------------------------------------------------------------------------|
| c21544.graph_c0 | 0.50208441    | 0.40206974    | 0.32259917    | 8.32595237     | 9.8003744      | 11.3595196     | 1.435E-16 | 3.569398  | up        | hypothetical protein JCGZ_21387 [Jatropha curcas]                                                          |
| c21546.graph_c0 | 0             | 0             | 0             | 7.14659716     | 21.7166813     | 18.7423134     | 1.139E-07 | Inf       | up        | -                                                                                                          |
| c21554.graph_c0 | 0             | 0.04716574    | 0.03027461    | 13.890781      | 15.9802199     | 18.5592125     | 3.023E-86 | 8.261719  | up        | PREDICTED: LRR receptor-like serine/threonine-protein kinase RCH1 [Sesamum indicum]                        |
| c21556.graph_c0 | 3.77911651    | 3.58024533    | 4.33599494    | 0.55953781     | 0.69155621     | 0.66383118     | 3.363E-22 | -3.633429 | down      | PREDICTED: ribulose biphosphate carboxylase/oxygenase activase, chloroplastic isoform X2 [Sesamum indicum] |
| c21558.graph_c0 | 0.05364942    | 0.05370314    | 0             | 1.68046174     | 2.56564785     | 2.55074575     | 4.14E-10  | 4.975966  | up        | hypothetical protein CICLE_v10024014mg, partial [Citrus clementina]                                        |
| c21564.graph_c0 | 0.54592569    | 0.34775513    | 0.5739841     | 13.8994977     | 11.5764308     | 13.1406701     | 5.313E-22 | 3.700571  | up        | PREDICTED: methylsterol monooxygenase 1-1-like [Sesamum indicum]                                           |
| c21570.graph_c0 | 0.66685389    | 0.54615407    | 0.46741835    | 14.7443831     | 15.5607198     | 17.2938381     | 1.686E-22 | 3.807828  | up        | PREDICTED: uncharacterized protein LOC105175024 [Sesamum indicum]                                          |
| c21575.graph_c0 | 0.07506663    | 0.0751418     | 0.03215453    | 26.8095821     | 19.4878745     | 17.3323122     | 4.438E-26 | 7.444542  | up        | PREDICTED: uncharacterized protein LOC105169481 [Sesamum indicum]                                          |
| c21576.graph_c0 | 0             | 0.06896954    | 0.08853993    | 7.42665444     | 9.61600426     | 10.1664499     | 2.024E-20 | 6.396654  | up        | hypothetical protein MIMGU_mgv1a000209mg [Erythranthe guttata]                                             |
| c21578.graph_c0 | 22.3908134    | 20.8827404    | 20.8703081    | 9.35923435     | 11.5729963     | 11.1965611     | 3.283E-35 | -2.018098 | down      | PREDICTED: LOW QUALITY PROTEIN: plasma membrane ATPase 1-like [Sesamum indicum]                            |
| c21581.graph_c0 | 5.12324476    | 4.68457324    | 5.15924179    | 2.20109193     | 3.8943297      | 4.94677319     | 1.368E-09 | -1.467786 | down      | PREDICTED: uncharacterized protein LOC105164695 [Sesamum indicum]                                          |
| c21582.graph_c0 | 5.70068152    | 3.73866924    | 4.54692504    | 21.9128482     | 24.9406671     | 18.8533612     | 0.0037469 | 1.215165  | up        | -                                                                                                          |
| c21587.graph_c0 | 2.75427886    | 3.44629607    | 2.79064716    | 11.07682       | 13.8023094     | 12.6348968     | 0.0005479 | 1.040682  | up        | hypothetical protein MIMGU_mgv1a003864mg [Erythranthe guttata]                                             |
| c21589.graph_c0 | 39.7640546    | 37.7191384    | 37.7791953    | 276.377945     | 262.441731     | 256.281876     | 2.464E-36 | 1.770362  | up        | PREDICTED: 40S ribosomal protein S9-2-like [Sesamum indicum]                                               |
| c21590.graph_c0 | 3.70330159    | 3.1633151     | 2.79188164    | 27.9306387     | 27.4687316     | 29.871589      | 8.364E-22 | 2.126875  | up        | hypothetical protein MIMGU_mgv1a025384mg [Erythranthe guttata]                                             |
| c21609.graph_c0 | 21.2824483    | 22.9760682    | 21.7483542    | 1.60601607     | 2.62295974     | 1.01222494     | 1.158E-73 | -4.676139 | down      | PREDICTED: pathogenesis-related genes transcriptional activator PTI6 [Sesamum indicum]                     |
| c21617.graph_c0 | 22.5448093    | 19.8799707    | 18.2229628    | 1.23667206     | 1.20932686     | 0.93109362     | 5.03E-139 | -5.1798   | down      | PREDICTED: probable galacturonosyltransferase-like 9 [Sesamum indicum]                                     |
| c21625.graph_c0 | 0.22637184    | 0.3776642     | 0             | 1.32080721     | 3.38762177     | 2.53605783     | 0.002962  | 2.568115  | up        | PREDICTED: transcription factor bHLH68-like [Sesamum indicum]                                              |
| c21625.graph_c1 | 0.37881644    | 0.37919577    | 0.24339706    | 2.35568529     | 2.1258499      | 3.02766332     | 0.0008317 | 1.892645  | up        | PREDICTED: transcription factor bHLH68-like [Sesamum indicum]                                              |
| c21628.graph_c0 | 0             | 0.04455761    | 0             | 1.92739068     | 3.86645677     | 4.30569608     | 8.74E-10  | 6.806443  | up        | PREDICTED: F-box/kelch-repeat protein At5g26960 [Sesamum indicum]                                          |

| #ID             | 0 h-1<br>FPKM | 0 h-2<br>FPKM | 0 h-3<br>FPKM | 48 h-1<br>FPKM | 48 h-2<br>FPKM | 48 h-3<br>FPKM | FDR       | log2FC    | regulated | nr_annotation                                                                    |
|-----------------|---------------|---------------|---------------|----------------|----------------|----------------|-----------|-----------|-----------|----------------------------------------------------------------------------------|
| c21629.graph_c0 | 0             | 0             | 0             | 88.6056768     | 85.679014      | 64.665782      | 4.444E-75 | Inf       | up        | -                                                                                |
| c21636.graph_c0 | 33.8016237    | 34.1979938    | 33.5080991    | 17.2383585     | 11.3106274     | 14.1510841     | 2.961E-25 | -2.260035 | down      | PREDICTED: probable histone H2A.3-like [Cicer<br>arietinum]                      |
| c21641.graph_c0 | 1.32509301    | 1.06113591    | 1.36223758    | 6.61924343     | 4.71317569     | 4.44146062     | 0.0026208 | 1.062023  | up        | PREDICTED: uncharacterized protein LOC105157824<br>isoform X1 [Sesamum indicum]  |
| c21652.graph_c0 | 7.82113138    | 7.85633706    | 7.52027687    | 40.8890242     | 43.1034475     | 44.4080976     | 2.207E-21 | 1.450383  | up        | PREDICTED: probable phenylalanine--tRNA ligase beta<br>subunit [Sesamum indicum] |
| c21653.graph_c0 | 0.10212881    | 0.10223108    | 0.19685934    | 3.62237722     | 3.5882831      | 3.3487475      | 9.238E-10 | 3.693576  | up        | PREDICTED: peroxidase 66-like [Sesamum indicum]                                  |
| c21657.graph_c0 | 2.12078345    | 1.74827643    | 1.68326779    | 9.07944233     | 14.1843443     | 15.8508752     | 1.844E-06 | 1.79232   | up        | PREDICTED: uncharacterized protein LOC105157568<br>[Sesamum indicum]             |
| c21659.graph_c0 | 5.7155553     | 6.348268      | 4.82940154    | 51.4292012     | 68.313891      | 57.3782415     | 1.775E-31 | 2.370848  | up        | PREDICTED: probable polygalacturonase [Sesamum<br>indicum]                       |
| c21669.graph_c0 | 0.74299742    | 1.08180571    | 0.78118454    | 8.46288053     | 7.185501       | 6.89347364     | 1.681E-09 | 2.09992   | up        | PREDICTED: BTB/POZ domain-containing protein<br>At3g19850-like [Sesamum indicum] |
| c21672.graph_c0 | 0.1123666     | 0             | 0.14439552    | 6.15940647     | 8.44430437     | 9.2571527      | 7.777E-20 | 5.505116  | up        | PREDICTED: wall-associated receptor kinase-like 20<br>[Sesamum indicum]          |
| c21676.graph_c1 | 7.24258934    | 8.09530428    | 7.29908682    | 3.26808769     | 4.53375821     | 5.43504987     | 3.335E-21 | -1.798343 | down      | PREDICTED: exocyst complex component SEC15B<br>[Sesamum indicum]                 |
| c21695.graph_c0 | 0.22402816    | 0.22425249    | 0.17992816    | 1.93490015     | 2.10445321     | 2.31850553     | 6.876E-06 | 2.321781  | up        | PREDICTED: uncharacterized protein LOC105168358<br>isoform X2 [Sesamum indicum]  |
| c21696.graph_c0 | 2.5407762     | 2.42771493    | 2.91871034    | 1.41862349     | 1.91614595     | 2.01965224     | 6.127E-05 | -1.583805 | down      | PREDICTED: uncharacterized protein LOC105164695<br>[Sesamum indicum]             |
| c21704.graph_c0 | 15.3339836    | 16.2165325    | 15.2517193    | 8.61966053     | 8.76509839     | 9.91856037     | 6.321E-27 | -1.795932 | down      | PREDICTED: protein DGCR14 [Sesamum indicum]                                      |
| c21705.graph_c0 | 104.474391    | 102.906771    | 98.8325417    | 72.6304185     | 60.5762472     | 56.9362873     | 2.646E-33 | -1.700193 | down      | PREDICTED: tetraspanin-3-like [Sesamum indicum]                                  |
| c21709.graph_c0 | 1.89049311    | 2.75256168    | 2.87106004    | 0.89721135     | 2.34826109     | 3.24029384     | 0.0065724 | -1.248998 | down      | PREDICTED: uncharacterized protein LOC105173813<br>[Sesamum indicum]             |
| c21716.graph_c0 | 7.29466678    | 5.414945      | 6.74080763    | 1.73671264     | 0.63994312     | 0.7390644      | 2.191E-17 | -3.640153 | down      | unnamed protein product [Vitis vinifera]                                         |
| c21718.graph_c0 | 0             | 0.0165736     | 0             | 3.29473549     | 4.0559424      | 5.41538285     | 1.387E-26 | 8.577529  | up        | PREDICTED: uncharacterized protein LOC105157238<br>isoform X1 [Sesamum indicum]  |
| c21719.graph_c0 | 0.24338589    | 0.16241973    | 0.3127605     | 2.61593445     | 2.77126535     | 2.39414682     | 3.473E-05 | 2.414908  | up        | hypothetical protein MIMGU_mgv1a015222mg<br>[Erythranthe guttata]                |
| c21720.graph_c0 | 0             | 0.43642088    | 0.11205142    | 1.84762302     | 4.16996936     | 6.07566642     | 0.0015892 | 3.432872  | up        | PREDICTED: allene oxide synthase [Sesamum indicum]                               |
| c21723.graph_c0 | 0.16046604    | 0.05354224    | 0             | 5.59296901     | 5.2986331      | 8.37470243     | 3.175E-18 | 5.490921  | up        | PREDICTED: scarecrow-like protein 28 [Sesamum<br>indicum]                        |
| c21726.graph_c0 | 0.98563935    | 1.17758625    | 1.06229759    | 0.93732672     | 0.868861       | 0.70371085     | 0.0029298 | -1.376288 | down      | PREDICTED: uncharacterized protein LOC105173388<br>[Sesamum indicum]             |
| c21733.graph_c0 | 14.7732486    | 15.9710852    | 14.4279992    | 8.01050437     | 5.76729188     | 4.49806224     | 9.926E-18 | -2.313619 | down      | -                                                                                |
| c21738.graph_c0 | 0             | 0             | 0             | 1.69670937     | 2.33669519     | 1.91231427     | 1.535E-11 | Inf       | up        | PREDICTED: uncharacterized protein LOC105171956<br>[Sesamum indicum]             |

| #ID             | 0 h-1<br>FPKM | 0 h-2<br>FPKM | 0 h-3<br>FPKM | 48 h-1<br>FPKM | 48 h-2<br>FPKM | 48 h-3<br>FPKM | FDR       | log2FC    | regulated | nr_annotation                                                                          |
|-----------------|---------------|---------------|---------------|----------------|----------------|----------------|-----------|-----------|-----------|----------------------------------------------------------------------------------------|
| c21746.graph_c0 | 3.86869203    | 3.4679695     | 3.33901506    | 0.63834473     | 1.29614361     | 0.80466002     | 1.139E-11 | -2.988587 | down      | unnamed protein product [Coffea canephora]                                             |
| c21750.graph_c0 | 0             | 0             | 0             | 5.48133308     | 3.85204079     | 3.04224955     | 4.534E-11 | Inf       | up        | PREDICTED: uncharacterized protein LOC105162958 [Sesamum indicum]                      |
| c21766.graph_c0 | 11.0619096    | 4.23887762    | 4.66429418    | 0              | 0              | 0              | 5.765E-09 | -Inf      | down      | 60S ribosomal protein L7a [Zea mays]                                                   |
| c21769.graph_c0 | 6.536724      | 7.35308013    | 5.23957224    | 98.1416338     | 100.810924     | 99.9260093     | 4.039E-84 | 2.950557  | up        | p-coumaroyl shikimate 3'-hydroxylase isoform 2 [Ocimum basilicum]                      |
| c21771.graph_c0 | 1.00339128    | 0.89279646    | 0.5253101     | 8.52492529     | 8.92231591     | 10.2966844     | 7.623E-13 | 2.504754  | up        | PREDICTED: replication factor C subunit 3 [Sesamum indicum]                            |
| c21772.graph_c0 | 29.819347     | 26.1671498    | 25.5250194    | 13.1031956     | 12.4452559     | 11.8199605     | 4.23E-37  | -2.139978 | down      | PREDICTED: acylating signal conjugator 1 [Sesamum indicum]                             |
| c21774.graph_c0 | 39.6863671    | 37.3484846    | 44.1309174    | 17.7337775     | 15.3095411     | 12.8182343     | 1.927E-41 | -2.416131 | down      | PREDICTED: F-box protein At5g39230 [Sesamum indicum]                                   |
| c21785.graph_c0 | 0             | 0.20678885    | 0             | 3.6794582      | 4.16676324     | 5.19317758     | 1.314E-11 | 4.968842  | up        | PREDICTED: protein TORNADO 2 [Sesamum indicum]                                         |
| c21789.graph_c0 | 3.56497991    | 4.84683616    | 3.41876144    | 0.04901928     | 0.15578996     | 0              | 3.52E-31  | -6.880534 | down      | PREDICTED: COBRA-like protein 10 [Sesamum indicum]                                     |
| c21813.graph_c0 | 0.37704398    | 0.12580718    | 0             | 24.3150255     | 33.1184844     | 32.0409431     | 2.483E-31 | 6.471225  | up        | PREDICTED: probable receptor-like protein kinase At1g80640 [Nicotiana tomentosiformis] |
| c21818.graph_c0 | 6.46476606    | 7.33407148    | 4.9844882     | 0.72792673     | 0.63094099     | 0.8243516      | 8.826E-22 | -4.118687 | down      | -                                                                                      |
| c21827.graph_c0 | 0             | 0             | 0             | 3.07110489     | 5.25559446     | 5.96453558     | 3.759E-17 | Inf       | up        | PREDICTED: L-ascorbate oxidase-like [Sesamum indicum]                                  |
| c21836.graph_c0 | 0.26628636    | 0.2132424     | 0.34218851    | 1.52098623     | 1.40339074     | 1.48433515     | 0.00866   | 1.403578  | up        | PREDICTED: NAC domain-containing protein 21/22-like [Sesamum indicum]                  |
| c21839.graph_c0 | 0.15460317    | 0.15475798    | 0.06622373    | 1.42430521     | 1.10651102     | 2.02774113     | 2.009E-05 | 2.591049  | up        | PREDICTED: uncharacterized protein LOC105177291 [Sesamum indicum]                      |
| c21856.graph_c0 | 0             | 0             | 0             | 1.43200292     | 1.65188087     | 2.29353766     | 1.776E-13 | Inf       | up        | PREDICTED: cytochrome P450 1A8-like [Sesamum indicum]                                  |
| c21857.graph_c0 | 15.1495907    | 11.0685323    | 15.7756504    | 198.362899     | 203.768366     | 205.764495     | 3.195E-75 | 2.835949  | up        | PREDICTED: DNA-binding protein S1FA-like [Nicotiana glauca]                            |
| c21859.graph_c0 | 0.09844465    | 0.03941729    | 0.20240843    | 0.87065886     | 1.99844123     | 2.71147456     | 0.0007053 | 2.991441  | up        | PREDICTED: oligopeptide transporter 4-like [Sesamum indicum]                           |
| c21871.graph_c0 | 0             | 0             | 0.05079996    | 3.0956399      | 6.01876467     | 5.89783155     | 2.502E-14 | 7.146061  | up        | hypothetical protein MIMGU_mgv1a006316mg [Erythranthe guttata]                         |
| c21881.graph_c0 | 0.35376525    | 0.56659119    | 0.27276141    | 6.84414414     | 6.56001312     | 6.14787714     | 1.172E-08 | 3.022743  | up        | PREDICTED: LOW QUALITY PROTEIN: alkaline/neutral invertase CINV2 [Sesamum indicum]     |
| c21889.graph_c0 | 11.0064193    | 11.5284536    | 9.86646644    | 6.09518621     | 7.57315454     | 9.59148951     | 8.895E-20 | -1.500015 | down      | hypothetical protein MIMGU_mgv1a009265mg [Erythranthe guttata]                         |
| c21894.graph_c0 | 0.04729404    | 0.0946828     | 0             | 3.74705049     | 2.35403288     | 2.17104381     | 1.112E-07 | 4.872288  | up        | PREDICTED: probable membrane-associated kinase regulator 2 [Sesamum indicum]           |
| c21898.graph_c0 | 0             | 0             | 0             | 4.57298088     | 4.28805375     | 3.71159777     | 4.504E-22 | Inf       | up        | PREDICTED: uncharacterized protein LOC105164396 [Sesamum indicum]                      |
| c21901.graph_c0 | 0.35569413    | 0.32637944    | 0.30472069    | 47.1871626     | 59.998464      | 57.9263072     | 1.75E-150 | 6.366184  | up        | vacuolar invertase CvINV [Elsholtzia haichowensis]                                     |
| c21905.graph_c0 | 27.7995146    | 28.5442154    | 30.7874461    | 14.3348092     | 19.8879311     | 25.8836322     | 1.008E-18 | -1.561831 | down      | PREDICTED: auxin-induced protein 22D [Sesamum indicum]                                 |

| #ID             | 0 h-1<br>FPKM | 0 h-2<br>FPKM | 0 h-3<br>FPKM | 48 h-1<br>FPKM | 48 h-2<br>FPKM | 48 h-3<br>FPKM | FDR       | log2FC    | regulated | nr_annotation                                                                    |
|-----------------|---------------|---------------|---------------|----------------|----------------|----------------|-----------|-----------|-----------|----------------------------------------------------------------------------------|
| c21908.graph_c0 | 5.94914524    | 5.18590168    | 5.25585993    | 1.23316664     | 1.06446636     | 0.79246863     | 9.96E-37  | -3.41852  | down      | PREDICTED: lysine-specific demethylase JMJ18 [Sesamum indicum]                   |
| c21909.graph_c0 | 0             | 0             | 0             | 1.2918198      | 1.55859955     | 0.7024438      | 2.519E-07 | Inf       | up        | hypothetical protein MIMGU_mgv1a0261841mg, partial [Erythranthe guttata]         |
| c21911.graph_c0 | 0.70849569    | 0.70920514    | 1.05051348    | 16.8701063     | 20.6377107     | 24.7501464     | 2.618E-27 | 3.629701  | up        | PREDICTED: inositol monophosphatase 3-like [Sesamum indicum]                     |
| c21921.graph_c0 | 0             | 0             | 0             | 2.20804774     | 2.87896473     | 3.52639826     | 6.636E-13 | Inf       | up        | hypothetical protein MIMGU_mgv1a000635mg [Erythranthe guttata]                   |
| c21925.graph_c0 | 0.24587332    | 0.28127946    | 0.31595695    | 9.25473693     | 12.7524092     | 13.1008329     | 2.922E-32 | 4.354242  | up        | PREDICTED: inactive rhomboid protein 1-like [Sesamum indicum]                    |
| c21938.graph_c0 | 23.5215631    | 23.6241269    | 27.0818099    | 26.9779225     | 24.3429345     | 20.8343489     | 2.166E-08 | -1.056566 | down      | hypothetical protein MIMGU_mgv1a0149401mg [Erythranthe guttata]                  |
| c21940.graph_c0 | 0.16519651    | 0             | 0             | 7.10219048     | 6.12661212     | 6.72573907     | 3.176E-18 | 5.922429  | up        | PREDICTED: uncharacterized protein LOC105161910 [Sesamum indicum]                |
| c21944.graph_c0 | 0.43855056    | 0.36582475    | 1.03318386    | 2.82814965     | 3.85210495     | 2.87596635     | 0.0063598 | 1.346339  | up        | PREDICTED: transcription repressor KAN1-like isoform X4 [Sesamum indicum]        |
| c21946.graph_c0 | 0.2219478     | 0.20365588    | 0.1663735     | 1.09052154     | 1.82316889     | 2.0468099      | 2.226E-05 | 2.0425    | up        | PREDICTED: receptor protein kinase CLAVATA1 [Sesamum indicum]                    |
| c21947.graph_c0 | 9.43796014    | 9.51871204    | 9.65675534    | 53.7112949     | 59.7160891     | 62.2726382     | 7.503E-26 | 1.598388  | up        | PREDICTED: diaminopimelate decarboxylase 1, chloroplastic-like [Sesamum indicum] |
| c21948.graph_c0 | 1.88287826    | 2.20421515    | 1.35332055    | 1.20542103     | 1.77533787     | 2.01435077     | 0.0031895 | -1.144505 | down      | PREDICTED: U-box domain-containing protein 38-like [Sesamum indicum]             |
| c21950.graph_c0 | 1.04646697    | 0.68915451    | 0.81392853    | 14.8924005     | 17.6311931     | 15.5086077     | 2.555E-38 | 3.217341  | up        | PREDICTED: uncharacterized protein LOC105173886 [Sesamum indicum]                |
| c21965.graph_c0 | 23.9577838    | 26.1619352    | 25.3364236    | 8.13159536     | 11.6350868     | 9.86651544     | 1.853E-21 | -2.3716   | down      | PREDICTED: probable methyltransferase PMT16 [Sesamum indicum]                    |
| c21976.graph_c0 | 1.50828221    | 4.75032283    | 4.11277085    | 202.261044     | 188.061623     | 132.776612     | 9.688E-24 | 4.638439  | up        | PREDICTED: epidermis-specific secreted glycoprotein EP1-like [Sesamum indicum]   |
| c21977.graph_c0 | 0.05250836    | 0.21024378    | 0.13495066    | 26.1704047     | 41.7146719     | 43.7316987     | 6.805E-32 | 7.104503  | up        | gibberellin 3-oxidase [Torenia fournieri]                                        |
| c21982.graph_c0 | 4.62797861    | 5.25374528    | 3.85400976    | 0.47637941     | 0.95886583     | 0.97492294     | 1.032E-31 | -3.537618 | down      | PREDICTED: exocyst complex component EXO70B1 [Sesamum indicum]                   |
| c21983.graph_c0 | 0.12301734    | 0.08209368    | 0             | 3.05995311     | 5.36272844     | 7.52951906     | 5.377E-08 | 5.269633  | up        | PREDICTED: mitotic spindle checkpoint protein BUBR1 isoform X2 [Sesamum indicum] |
| c21997.graph_c0 | 0             | 0             | 0             | 4.05994002     | 1.16380383     | 1.48750421     | 0.0013063 | Inf       | up        | PREDICTED: uncharacterized protein LOC105158717 [Sesamum indicum]                |
| c22004.graph_c0 | 0.35812537    | 0.35848398    | 0.69030792    | 22.7650632     | 24.1168241     | 27.8889935     | 1.594E-17 | 4.704505  | up        | H(+)-transporting atpase plant/fungi plasma membrane type [Theobroma cacao]      |

| #ID             | 0 h-1<br>FPKM | 0 h-2<br>FPKM | 0 h-3<br>FPKM | 48 h-1<br>FPKM | 48 h-2<br>FPKM | 48 h-3<br>FPKM | FDR       | log2FC    | regulated | nr_annotation                                                                                                     |
|-----------------|---------------|---------------|---------------|----------------|----------------|----------------|-----------|-----------|-----------|-------------------------------------------------------------------------------------------------------------------|
| c22004.graph_c2 | 28.6772665    | 30.1456004    | 25.060446     | 21.8880625     | 21.5876251     | 20.9377353     | 4.915E-22 | -1.396311 | down      | PREDICTED: uncharacterized protein LOC105170398 [Sesamum indicum]                                                 |
| c22008.graph_c0 | 4.48035217    | 3.91675901    | 3.68475515    | 2.44903831     | 2.06973705     | 2.2525937      | 3.668E-10 | -1.848491 | down      | hypothetical protein MIMGU_mgv1a027091mg [Erythranthe guttata]                                                    |
| c22011.graph_c0 | 107.880538    | 99.3724548    | 98.8112878    | 45.4640774     | 41.8631962     | 45.8631641     | 1.715E-43 | -2.216235 | down      | PREDICTED: salt stress-induced hydrophobic peptide ESI3 [Solanum lycopersicum]                                    |
| c22023.graph_c0 | 1.63980724    | 1.69274455    | 1.11945915    | 0.14162788     | 0.35008765     | 0.29404582     | 5.696E-11 | -3.529579 | down      | CLAVATA3/ESK (CLE)-related protein 20 [Arabidopsis thaliana]                                                      |
| c22045.graph_c0 | 0.07749917    | 0.21333614    | 0.14938426    | 3.55201542     | 2.55274121     | 2.52527312     | 1.505E-11 | 3.280694  | up        | PREDICTED: receptor-like protein kinase HERK 1 [Sesamum indicum]                                                  |
| c22047.graph_c0 | 56.7538854    | 51.8116829    | 58.802476     | 32.3127934     | 38.6143259     | 41.6360583     | 2.66E-28  | -1.594337 | down      | PREDICTED: probable serine incorporator [Sesamum indicum]                                                         |
| c22049.graph_c0 | 70.8123996    | 78.4844891    | 59.6063898    | 926.803703     | 886.295521     | 741.86794      | 8.642E-30 | 2.59941   | up        | hypothetical protein MIMGU_mgv1a015271mg [Erythranthe guttata]                                                    |
| c22059.graph_c0 | 3.31047319    | 1.88079867    | 2.06955687    | 0              | 0              | 0.22003094     | 1.144E-13 | -6.081926 | down      | -                                                                                                                 |
| c22063.graph_c0 | 0             | 0             | 0             | 5.89525137     | 8.57068314     | 6.33373374     | 8.559E-32 | Inf       | up        | PREDICTED: reticulate oxidase-like protein [Sesamum indicum]                                                      |
| c22065.graph_c0 | 2.26529571    | 1.53870418    | 2.183246      | 0.22360052     | 0.55271448     | 0.46423626     | 1.928E-09 | -3.303138 | down      | -                                                                                                                 |
| c22068.graph_c0 | 3.93736921    | 4.33544308    | 3.66826461    | 58.0075533     | 66.8318182     | 79.7756196     | 1.653E-36 | 3.078632  | up        | PREDICTED: glycerol-3-phosphate 2-O-acyltransferase 4 [Sesamum indicum]                                           |
| c22075.graph_c0 | 0             | 0             | 0             | 1.18620829     | 1.98968609     | 3.56224838     | 1.727E-05 | Inf       | up        | PREDICTED: pyruvate dehydrogenase E1 component subunit beta-3, chloroplastic-like [Beta vulgaris subsp. vulgaris] |
| c22080.graph_c0 | 6.17516755    | 6.87150189    | 5.89371953    | 1.65698072     | 2.3697497      | 1.05663289     | 1.404E-28 | -2.916258 | down      | PREDICTED: vacuolar protein sorting-associated protein 4-like [Sesamum indicum]                                   |
| c22084.graph_c0 | 0.30095808    | 0.25822238    | 0.19337152    | 3.5846043      | 4.69961109     | 5.77997496     | 5.996E-15 | 3.204293  | up        | PREDICTED: uncharacterized protein LOC105169955 isoform X1 [Sesamum indicum]                                      |
| c22085.graph_c0 | 0.05843516    | 0.01949789    | 0.0250305     | 2.36870827     | 2.4903489      | 3.36906638     | 5.051E-19 | 5.305843  | up        | PREDICTED: WD repeat and HMG-box DNA-binding protein 1 [Sesamum indicum]                                          |
| c22088.graph_c0 | 9.17962269    | 9.04744831    | 11.2517396    | 0.19515847     | 0.13783116     | 0.05788361     | 2.805E-51 | -7.243364 | down      | PREDICTED: nuclear transcription factor Y subunit C-2 [Sesamum indicum]                                           |
| c22094.graph_c0 | 244.890801    | 271.317847    | 244.597046    | 54.1633103     | 35.1656268     | 24.0338469     | 1.35E-138 | -3.751586 | down      | PREDICTED: ethylene-responsive transcription factor ERF008-like [Sesamum indicum]                                 |
| c22097.graph_c0 | 0.15539659    | 0.28517903    | 0.26625437    | 4.08010215     | 5.15651574     | 5.90213566     | 6.972E-16 | 3.395028  | up        | PREDICTED: MATE efflux family protein 5-like [Sesamum indicum]                                                    |
| c22099.graph_c0 | 0             | 0             | 0.08146325    | 5.25620623     | 4.57839081     | 4.36514465     | 9.366E-15 | 6.39878   | up        | PREDICTED: CBL-interacting serine/threonine-protein kinase 5 [Sesamum indicum]                                    |
| c22111.graph_c0 | 0.10675351    | 0.21372082    | 0.41154747    | 13.8671102     | 14.3779575     | 14.1328206     | 3.498E-29 | 4.825396  | up        | PREDICTED: (DL)-glycerol-3-phosphatase 2 [Sesamum indicum]                                                        |
| c22114.graph_c0 | 0.25351165    | 0.25376551    | 0.18615572    | 3.77018801     | 2.72161409     | 3.38437815     | 5.137E-08 | 2.822515  | up        | PREDICTED: uncharacterized protein LOC105171186 [Sesamum indicum]                                                 |



| #ID             | 0 h-1<br>FPKM | 0 h-2<br>FPKM | 0 h-3<br>FPKM | 48 h-1<br>FPKM | 48 h-2<br>FPKM | 48 h-3<br>FPKM | FDR       | log2FC    | regulated | nr_annotation                                                                                              |
|-----------------|---------------|---------------|---------------|----------------|----------------|----------------|-----------|-----------|-----------|------------------------------------------------------------------------------------------------------------|
| c22122.graph_c0 | 1.39248111    | 0.85181279    | 2.28644707    | 14.0400195     | 16.7612234     | 15.3463931     | 1.675E-10 | 2.320463  | up        | PREDICTED: plastidial pyruvate kinase 2-like [Sesamum indicum]                                             |
| c22136.graph_c0 | 3.47190995    | 3.96411277    | 3.69471426    | 0.69968279     | 0.47650441     | 1.51196431     | 2.208E-12 | -3.071559 | down      | hypothetical protein MIMGU_mgv1a003925mg [Erythranthe guttata]                                             |
| c22145.graph_c0 | 0.1851713     | 0.10591813    | 0.10197962    | 1.31599448     | 1.49740596     | 1.86486856     | 4.659E-06 | 2.556215  | up        | PREDICTED: putative pentatricopeptide repeat-containing protein At3g25060, mitochondrial [Sesamum indicum] |
| c22152.graph_c0 | 0.18850776    | 0.02695665    | 0.03460571    | 1.56299083     | 2.15516729     | 1.85431979     | 8.674E-09 | 3.46828   | up        | PREDICTED: pyruvate kinase isozyme A, chloroplastic-like [Sesamum indicum]                                 |
| c22156.graph_c0 | 31.3519044    | 30.5419233    | 26.2468915    | 3.09741762     | 3.11727147     | 3.10057152     | 1.073E-74 | -4.257843 | down      | PREDICTED: serine/threonine-protein kinase OXI1 [Sesamum indicum]                                          |
| c22160.graph_c0 | 1.44161863    | 1.50719829    | 1.35852715    | 0.3541635      | 0.4689916      | 0.44643778     | 4.471E-09 | -2.783896 | down      | -                                                                                                          |
| c22176.graph_c0 | 0.26967307    | 0.22495259    | 0.4620541     | 7.20477222     | 9.91358422     | 10.6109181     | 4.927E-19 | 3.826408  | up        | hypothetical protein MIMGU_mgv1a009135mg [Erythranthe guttata]                                             |
| c22178.graph_c0 | 8.85643996    | 11.2758151    | 10.4181433    | 3.37704179     | 5.06604277     | 5.417542       | 4.008E-24 | -2.166071 | down      | PREDICTED: uncharacterized protein LOC105169534 [Sesamum indicum]                                          |
| c22183.graph_c0 | 1.26984785    | 0.88272182    | 1.17852567    | 14.3308667     | 20.4489761     | 18.7947559     | 3.779E-28 | 2.983672  | up        | PREDICTED: malonyl-coenzyme:anthocyanin 5-O-glucoside-6-O-malonyltransferase-like [Sesamum indicum]        |
| c22209.graph_c0 | 1.75618537    | 1.1796729     | 1.30654974    | 0.80895626     | 0.76678148     | 1.11759106     | 3.485E-05 | -1.673135 | down      | PREDICTED: receptor-like protein kinase HSL1 [Sesamum indicum]                                             |
| c22236.graph_c0 | 3.72716238    | 4.94560443    | 4.23262666    | 0              | 0.08459521     | 0.28421304     | 2.477E-22 | -6.172748 | down      | -                                                                                                          |
| c22263.graph_c0 | 0.96528316    | 0.66257125    | 0.77969702    | 4.82752981     | 3.49917748     | 4.58941011     | 0.0001647 | 1.4112    | up        | PREDICTED: probable receptor-like serine/threonine-protein kinase At4g34500 [Sesamum indicum]              |
| c22267.graph_c0 | 0.87535782    | 1.2745227     | 1.32939117    | 6.67143104     | 7.92189415     | 8.61075052     | 0.0001257 | 1.713333  | up        | PREDICTED: lipoxygenase homology domain-containing protein 1-like [Sesamum indicum]                        |
| c22278.graph_c0 | 0.34187654    | 0.34221888    | 0.4393249     | 22.7670343     | 27.0741939     | 29.3860674     | 4.521E-58 | 5.115926  | up        | PREDICTED: probable serine/threonine-protein kinase At4g35230 [Sesamum indicum]                            |
| c22287.graph_c0 | 0             | 0             | 0             | 3.83007296     | 8.27729567     | 4.6348472      | 6.504E-07 | Inf       | up        | -                                                                                                          |
| c22291.graph_c0 | 1.02004313    | 0.69862311    | 1.0348388     | 8.70486982     | 12.2083449     | 13.5987052     | 1.534E-12 | 2.621941  | up        | PREDICTED: ras-related protein Rab7 [Sesamum indicum]                                                      |
| c22292.graph_c0 | 0.85849438    | 1.0868301     | 1.00585815    | 0.18609436     | 0.24643051     | 0.55885153     | 1.357E-07 | -2.60286  | down      | -                                                                                                          |
| c22320.graph_c0 | 0             | 0             | 0             | 1.68321703     | 1.30308163     | 1.61292534     | 5.771E-11 | Inf       | up        | kecname: rui=008 ribosomal protein L3 [Medicago sativa]                                                    |
| c22326.graph_c0 | 70.5696857    | 74.2135978    | 70.6502731    | 13.6322947     | 16.7048025     | 16.8318464     | 7.24E-105 | -3.212422 | down      | PREDICTED: EIN3-binding F-box protein 2, partial [Sesamum indicum]                                         |
| c22337.graph_c0 | 0.31795031    | 0.59981407    | 0.17286024    | 4.94578357     | 6.77907092     | 8.54082155     | 5.234E-12 | 3.198482  | up        | PREDICTED: myosin-9-like [Sesamum indicum]                                                                 |
| c22345.graph_c0 | 31.6982939    | 29.4759887    | 33.8333417    | 203.619868     | 235.827767     | 251.322985     | 2.244E-30 | 1.840429  | up        | ribosomal protein L32 [Medicago sativa]                                                                    |
| c22345.graph_c1 | 59.1561086    | 55.9854166    | 59.8929237    | 432.684788     | 377.548745     | 410.275153     | 1.113E-26 | 1.786013  | up        | PREDICTED: 008 ribosomal protein L32-1 [Sesamum indicum]                                                   |

| #ID             | 0 h-1<br>FPKM | 0 h-2<br>FPKM | 0 h-3<br>FPKM | 48 h-1<br>FPKM | 48 h-2<br>FPKM | 48 h-3<br>FPKM | FDR       | log2FC    | regulated | nr_annotation                                                                                     |
|-----------------|---------------|---------------|---------------|----------------|----------------|----------------|-----------|-----------|-----------|---------------------------------------------------------------------------------------------------|
| c22346.graph_c0 | 2.67204732    | 3.04621228    | 2.25733101    | 61.3136751     | 41.1941314     | 35.3907663     | 1.601E-07 | 3.106154  | up        | PREDICTED: uncharacterized protein LOC105163060 [Sesamum indicum]                                 |
| c22348.graph_c0 | 0.07990306    | 0.07998307    | 0.0684524     | 1.74214862     | 1.66363513     | 1.76848483     | 7.898E-09 | 3.486756  | up        | PREDICTED: LOW QUALITY PROTEIN: recQ-mediated genome instability protein 1 [Sesamum indicum]      |
| c22359.graph_c0 | 0             | 0             | 0             | 5.23192351     | 5.10957382     | 3.70971934     | 1.753E-13 | Inf       | up        | calmodulin [Chara corallina]                                                                      |
| c22362.graph_c0 | 6685.5471     | 6693.30449    | 6723.05173    | 37.4310113     | 31.6399947     | 26.2269368     | 5.13E-225 | -8.73329  | down      | hypothetical protein MIMGU_mgv1a011867mg [Erythranthe guttata]                                    |
| c22366.graph_c0 | 0.08612068    | 0.02873564    | 0.03688949    | 6.77034561     | 3.89436747     | 2.84738184     | 1.958E-06 | 5.479411  | up        | PREDICTED: probable LRR receptor-like serine/threonine-protein kinase At4g37250 [Sesamum indicum] |
| c22379.graph_c0 | 0.4735244     | 0.35549892    | 0.3042488     | 2.1812078      | 3.23501525     | 2.42603198     | 0.0014703 | 1.77162   | up        | hypothetical protein MIMGU_mgv1a016703mg [Erythranthe guttata]                                    |
| c22389.graph_c0 | 2.33963942    | 2.53041757    | 2.00435286    | 18.0114537     | 17.7948899     | 19.774079      | 5.494E-23 | 1.999177  | up        | PREDICTED: uncharacterized protein LOC105168835 [Sesamum indicum]                                 |
| c22396.graph_c0 | 288.044775    | 309.121092    | 258.335753    | 144.519226     | 166.185021     | 140.605783     | 5.552E-41 | -1.940115 | down      | PREDICTED: ethylene-responsive transcription factor 4-like [Sesamum indicum]                      |
| c22400.graph_c0 | 4.6239143     | 7.98423918    | 5.12489991    | 1.49094801     | 1.29742887     | 1.27925669     | 6.643E-09 | -3.137441 | down      | PREDICTED: uncharacterized protein LOC105158187 [Sesamum indicum]                                 |
| c22403.graph_c0 | 786.901076    | 826.627547    | 722.444604    | 119.122352     | 140.830145     | 160.683875     | 2.11E-120 | -3.493797 | down      | -                                                                                                 |
| c22409.graph_c0 | 0.81724096    | 0.53173855    | 0.68262154    | 30.831078      | 31.8243069     | 34.7689542     | 5.82E-75  | 4.565418  | up        | GDP-mannose 3,5-epimerase 1 [Theobroma cacao]                                                     |
| c22443.graph_c0 | 0             | 0.22080171    | 0             | 3.04820179     | 4.19796024     | 2.89308973     | 6.345E-09 | 4.511728  | up        | PREDICTED: uncharacterized protein LOC105175907 [Sesamum indicum]                                 |
| c22444.graph_c0 | 0.55421266    | 0.63798277    | 0.56974817    | 8.45004695     | 10.1147228     | 12.4707605     | 8.287E-22 | 3.116634  | up        | asparagine synthetase [Striga hermonthica]                                                        |
| c22447.graph_c0 | 0.4365081     | 0.71783854    | 0.40066442    | 28.7242667     | 31.9513715     | 34.8875979     | 1.389E-97 | 4.924228  | up        | hypothetical protein SBB1_14100005 [Solanum tuberosum]                                            |
| c22453.graph_c0 | 3.71997801    | 3.79892932    | 4.29745851    | 33.6650657     | 32.4735431     | 34.5444753     | 1.658E-41 | 2.072235  | up        | PREDICTED: probable receptor protein kinase TMK1 [Sesamum indicum]                                |
| c22457.graph_c0 | 0.11409707    | 0.14276415    | 0.10996444    | 0.97230139     | 1.08571302     | 1.05220695     | 0.0002794 | 2.065844  | up        | PREDICTED: putative pentatricopeptide repeat-containing protein At1g68930 [Sesamum indicum]       |
| c22462.graph_c0 | 0             | 0.09557537    | 0             | 2.19905463     | 3.26148443     | 2.81765605     | 5.479E-10 | 5.424578  | up        | unknown [Lotus japonicus]                                                                         |
| c22469.graph_c0 | 4.00702817    | 4.0110406     | 2.7355071     | 0              | 0              | 0              | 2.783E-21 | -Inf      | down      | -                                                                                                 |
| c22473.graph_c0 | 12.5012327    | 13.0765385    | 12.7921647    | 52.3137693     | 54.032172      | 54.5189213     | 1.453E-12 | 1.049621  | up        | hypothetical protein MIMGU_mgv1a005340mg [Erythranthe guttata]                                    |
| c22477.graph_c0 | 0.34554891    | 0.17294746    | 0.0555055     | 1.87026038     | 1.64406914     | 1.80577593     | 0.0001692 | 2.20981   | up        | PREDICTED: kinetochore protein SPC25 [Sesamum indicum]                                            |
| c22480.graph_c0 | 0.20337371    | 0.67859118    | 0.37749582    | 5.47510835     | 5.73405128     | 6.26099182     | 2.176E-15 | 2.774895  | up        | PREDICTED: protein LONGIFOLIA 1-like [Sesamum indicum]                                            |
| c22492.graph_c0 | 0.38817115    | 0.98906142    | 0.68020268    | 3.12094763     | 3.13406424     | 3.0951984      | 0.0089392 | 1.1655    | up        | PREDICTED: uncharacterized protein LOC105155609 [Sesamum indicum]                                 |
| c22502.graph_c0 | 4.65501698    | 4.96690981    | 5.45600146    | 19.0862048     | 25.9109399     | 24.9919579     | 4.668E-08 | 1.190397  | up        | PREDICTED: NAPI-related protein Z-like [Sesamum indicum]                                          |

| #ID             | 0 h-1<br>FPKM | 0 h-2<br>FPKM | 0 h-3<br>FPKM | 48 h-1<br>FPKM | 48 h-2<br>FPKM | 48 h-3<br>FPKM | FDR       | log2FC    | regulated | nr_annotation                                                                      |
|-----------------|---------------|---------------|---------------|----------------|----------------|----------------|-----------|-----------|-----------|------------------------------------------------------------------------------------|
| c22513.graph_c0 | 2.51744689    | 1.91997541    | 2.77287336    | 0.88351858     | 1.4039712      | 1.47403035     | 3.278E-05 | -1.966795 | down      | PREDICTED: protein IQ-DOMAIN 14-like [Sesamum indicum]                             |
| c22518.graph_c0 | 0.09031828    | 0.22602181    | 0.11606257    | 18.2223538     | 18.0041938     | 24.117609      | 1.072E-52 | 6.106835  | up        | PREDICTED: DNA (cytosine-5)-methyltransferase CMT3 [Sesamum indicum]               |
| c22524.graph_c0 | 0.49685258    | 0.94948655    | 0.58043203    | 10.9023678     | 11.5497367     | 17.0690728     | 1.344E-12 | 3.264995  | up        | PREDICTED: uncharacterized protein LOC105161197 [Sesamum indicum]                  |
| c22529.graph_c1 | 4.51780942    | 3.69567024    | 2.80914386    | 1.34261313     | 3.60325073     | 4.10162855     | 0.0006176 | -1.313985 | down      | PREDICTED: CBS domain-containing protein CBSX5 [Sesamum indicum]                   |
| c22532.graph_c0 | 0.35416865    | 0.23634886    | 0.60682765    | 123.226311     | 132.098793     | 128.710697     | 9.81E-206 | 7.29866   | up        | unnamed protein product [Coffea canephora]                                         |
| c22540.graph_c0 | 1.74932343    | 3.09013255    | 1.85125283    | 1.80118977     | 1.50642801     | 1.47615984     | 0.0011757 | -1.495858 | down      | PREDICTED: probable WRKY transcription factor 71 isoform X1 [Sesamum indicum]      |
| c22552.graph_c0 | 5.78221411    | 5.13213963    | 5.26230457    | 0.89034055     | 0.79932869     | 0.71165496     | 5.378E-61 | -3.765786 | down      | PREDICTED: pentatricopeptide repeat-containing protein At3g26540 [Sesamum indicum] |
| c22556.graph_c0 | 15.6975032    | 15.9025378    | 14.6226117    | 5.45938552     | 7.59860944     | 8.37182981     | 4.895E-34 | -2.132246 | down      | PREDICTED: E3 ubiquitin-protein ligase RING1-like [Sesamum indicum]                |
| c22557.graph_c0 | 62.6485339    | 60.626933     | 64.6838882    | 51.7941961     | 54.0744577     | 53.5816595     | 4.947E-16 | -1.255969 | down      | PREDICTED: uncharacterized protein LOC105167256 isoform X2 [Sesamum indicum]       |
| c22559.graph_c0 | 0.64735733    | 0.43200371    | 0.55458653    | 5.0096575      | 5.98104526     | 7.18162947     | 1.208E-08 | 2.453566  | up        | PREDICTED: formin-like protein 6 [Sesamum indicum]                                 |
| c22561.graph_c0 | 2.83945304    | 3.35907748    | 3.0268534     | 2.1402731      | 2.55077981     | 2.56565288     | 4.387E-05 | -1.367063 | down      | PREDICTED: uncharacterized protein LOC105156990 [Sesamum indicum]                  |
| c22564.graph_c0 | 0             | 0.0816331     | 0             | 55.1457928     | 86.1181795     | 82.995112      | 2.576E-58 | 10.41027  | up        | PREDICTED: polygalacturonase-like [Sesamum indicum]                                |
| c22572.graph_c0 | 0.55124348    | 0.42917425    | 0.7083697     | 4.40129256     | 4.48330364     | 3.96645191     | 0.0001198 | 1.907089  | up        | PREDICTED: uncharacterized protein LOC105156684 [Sesamum indicum]                  |
| c22577.graph_c0 | 5.37840698    | 4.1724393     | 4.14687955    | 1.61035528     | 2.36212083     | 1.1022188      | 4.17E-07  | -2.450878 | down      | PREDICTED: uncharacterized protein LOC105177681 [Sesamum indicum]                  |
| c22578.graph_c0 | 0.12112271    | 0.060622      | 0.23347121    | 2.95703264     | 4.49205532     | 5.41123274     | 1.611E-10 | 3.916336  | up        | PREDICTED: cysteine-rich repeat secretory protein 60 [Sesamum indicum]             |
| c22583.graph_c0 | 0.19431654    | 0.25934816    | 0.16646963    | 1.25311952     | 1.32752818     | 1.53978705     | 0.0016951 | 1.715174  | up        | PREDICTED: uncharacterized protein LOC105155367 [Sesamum indicum]                  |
| c22593.graph_c0 | 0.37933827    | 0.18985906    | 0.32497646    | 5.99925479     | 5.36822351     | 8.44767414     | 5.741E-11 | 3.450252  | up        | hypothetical protein MIMGU_mgv1a007264mg [Erythranthe guttata]                     |
| c22594.graph_c0 | 0.26892655    | 0.40379376    | 0.11519376    | 2.39494258     | 5.5554864      | 5.73166999     | 4.752E-05 | 3.095299  | up        | hypothetical protein MIMGU_mgv1a000346mg [Erythranthe guttata]                     |
| c22603.graph_c0 | 6.39350022    | 6.92833465    | 5.95464378    | 4.32301609     | 5.03768249     | 6.65941537     | 9.005E-09 | -1.288263 | down      | PREDICTED: uncharacterized protein LOC105179085 [Sesamum indicum]                  |
| c22607.graph_c0 | 10.8315808    | 11.722795     | 9.48753044    | 6.48192874     | 8.06399296     | 9.39129179     | 1.519E-17 | -1.441565 | down      | PREDICTED: uncharacterized protein LOC105179586 [Sesamum indicum]                  |
| c22621.graph_c0 | 6.01081943    | 6.20845741    | 5.70700859    | 3.63292082     | 5.53008335     | 5.77465438     | 1.105E-06 | -1.287647 | down      | PREDICTED: MFP1 attachment factor 1-like [Sesamum indicum]                         |

| #ID             | 0 h-1<br>FPKM | 0 h-2<br>FPKM | 0 h-3<br>FPKM | 48 h-1<br>FPKM | 48 h-2<br>FPKM | 48 h-3<br>FPKM | FDR       | log2FC    | regulated | nr_annotation                                                                              |
|-----------------|---------------|---------------|---------------|----------------|----------------|----------------|-----------|-----------|-----------|--------------------------------------------------------------------------------------------|
| c22632.graph_c0 | 0.41524888    | 0.51958086    | 1.46743095    | 7.93800288     | 7.09222417     | 7.829075       | 5.727E-06 | 2.220512  | up        | PREDICTED: zinc finger HIT domain-containing protein 3 [Sesamum indicum]                   |
| c22634.graph_c0 | 0.06592552    | 0.04399435    | 0.05647793    | 6.17471347     | 7.22766684     | 10.7722797     | 7.436E-19 | 6.159667  | up        | PREDICTED: DNA replication licensing factor MCM3 homolog 2 [Sesamum indicum]               |
| c22635.graph_c0 | 3.45994573    | 3.70364689    | 3.34105053    | 14.1135619     | 15.2053553     | 14.9517548     | 4.009E-09 | 1.057249  | up        | PREDICTED: conserved oligomeric Golgi complex subunit 7 [Sesamum indicum]                  |
| c22637.graph_c0 | 0.19764727    | 0.16487099    | 0.29631533    | 14.7489301     | 7.10506042     | 4.4285093      | 0.0012166 | 4.314323  | up        | sucrose transporter 1 [Verbascum phoeniceum]                                               |
| c22646.graph_c1 | 0.07766931    | 0.23324125    | 0.09980814    | 2.00351291     | 2.95631003     | 3.31075409     | 3.526E-07 | 3.309273  | up        | hypothetical protein MIMGU_mgv1a025026mg, partial [Erythranthe guttata]                    |
| c22658.graph_c0 | 0             | 0             | 0.11456155    | 0.65704789     | 1.2761147      | 0.99875532     | 6.217E-07 | 3.617682  | up        | -                                                                                          |
| c22663.graph_c0 | 1.68171604    | 1.37165928    | 1.62747375    | 0.45905378     | 0.66867875     | 0.47654051     | 1.895E-10 | -2.567482 | down      | PREDICTED: putative calcium-transporting ATPase 13, plasma membrane-type [Sesamum indicum] |
| c22666.graph_c0 | 0             | 0             | 0             | 8.15252632     | 9.13728631     | 11.5644577     | 4.273E-16 | Inf       | up        | hypothetical protein OsI_01464 [Oryza sativa Indica Group]                                 |
| c22670.graph_c0 | 0             | 0.06171593    | 0.07922807    | 3.86239043     | 7.82243325     | 6.41860199     | 3.463E-12 | 5.963338  | up        | PREDICTED: pleckstrin homology domain-containing family A member 8 [Sesamum indicum]       |
| c22680.graph_c0 | 0             | 0             | 0             | 1.50602085     | 2.60309688     | 2.11586573     | 1.03E-11  | Inf       | up        | -                                                                                          |
| c22686.graph_c0 | 0             | 0             | 0.07880629    | 3.38984849     | 3.65098566     | 3.82060461     | 5.752E-13 | 6.05508   | up        | PREDICTED: uncharacterized protein LOC105161798 [Sesamum indicum]                          |
| c22691.graph_c0 | 0.86634041    | 0.74106859    | 0.78941796    | 0              | 0              | 0              | 8.707E-28 | -Inf      | down      | PREDICTED: geraniol 8-hydroxylase [Vitis vinifera]                                         |
| c22704.graph_c0 | 4.33923679    | 5.40534634    | 3.59348091    | 1.77670576     | 1.7880941      | 3.00371399     | 4.892E-06 | -2.040973 | down      | -                                                                                          |
| c22722.graph_c0 | 4.87144316    | 2.73875573    | 4.54492957    | 0.61477961     | 0.58615601     | 0.32821632     | 4.073E-12 | -4.004329 | down      | PREDICTED: protein UPSTREAM OF FLC [Sesamum indicum]                                       |
| c22728.graph_c0 | 2.53850363    | 2.79515011    | 1.9572466     | 0.87698817     | 1.42456269     | 3.27742296     | 0.0020373 | -1.413992 | down      | hypothetical protein MIMGU_mgv1a020957mg, partial [Erythranthe guttata]                    |
| c22730.graph_c0 | 16.6542668    | 17.4440888    | 15.7563873    | 7.42689994     | 8.71593704     | 9.14097556     | 1.061E-24 | -1.999518 | down      | PREDICTED: ABC transporter B family member 20 isoform X2 [Nicotiana tomentosiformis]       |
| c22740.graph_c0 | 0.16513605    | 0.08265071    | 0.15915478    | 12.0566277     | 10.153561      | 8.08823863     | 3.769E-21 | 5.20422   | up        | PREDICTED: probable WRKY transcription factor 29 [Sesamum indicum]                         |
| c22752.graph_c0 | 4.12406373    | 4.12819335    | 3.31224073    | 25.5269265     | 28.5520424     | 31.3766074     | 4.454E-08 | 1.867534  | up        | PREDICTED: transcription termination factor 4, mitochondrial [Sesamum indicum]             |
| c22754.graph_c0 | 23.8640314    | 24.1237746    | 21.9291624    | 13.1786579     | 17.3118757     | 19.9760809     | 8.911E-22 | -1.492785 | down      | PREDICTED: protein AUXIN RESPONSE 4 [Sesamum indicum]                                      |
| c22756.graph_c0 | 0.03756984    | 0             | 0             | 7.47614679     | 10.0467567     | 8.90043797     | 2.88E-34  | 8.457255  | up        | PREDICTED: uncharacterized protein LOC105158433 [Sesamum indicum]                          |
| c22766.graph_c0 | 88.5579153    | 79.2467087    | 81.9792512    | 4.46410284     | 6.00116084     | 5.80753073     | 2.31E-210 | -4.962361 | down      | PREDICTED: uncharacterized protein LOC104211375 [Nicotiana glauca]                         |
| c22770.graph_c0 | 0.91616151    | 0.61138594    | 0.3924346     | 6.82255756     | 7.07864829     | 7.38493961     | 9.643E-07 | 2.459416  | up        | PREDICTED: uncharacterized protein LOC105160016 [Sesamum indicum]                          |

| #ID             | 0 h-1<br>FPKM | 0 h-2<br>FPKM | 0 h-3<br>FPKM | 48 h-1<br>FPKM | 48 h-2<br>FPKM | 48 h-3<br>FPKM | FDR       | log2FC    | regulated | nr_annotation                                                                             |
|-----------------|---------------|---------------|---------------|----------------|----------------|----------------|-----------|-----------|-----------|-------------------------------------------------------------------------------------------|
| c22771.graph_c0 | 1.47319632    | 2.06454011    | 2.27173872    | 13.0291636     | 16.6784062     | 14.4915893     | 0.0003403 | 1.903148  | up        | PREDICTED: CBL-interacting serine/threonine-protein kinase 23-like [Tarenaya hassleriana] |
| c22778.graph_c0 | 0.14139626    | 0             | 0             | 35.0408691     | 45.6774486     | 49.7823305     | 2.73E-65  | 8.848503  | up        | PREDICTED: LOW QUALITY PROTEIN: 4-coumarate--CoA ligase 1-like [Sesamum indicum]          |
| c22778.graph_c1 | 0             | 0             | 0             | 38.872364      | 43.4289198     | 46.117861      | 3.37E-102 | Inf       | up        | 4-coumarate coenzyme A ligase [Paulownia fortunei]                                        |
| c22780.graph_c0 | 1.29267178    | 2.10868565    | 2.70703387    | 35.6826996     | 55.8845318     | 66.6794529     | 6.296E-13 | 3.662752  | up        | PREDICTED: uncharacterized protein At4g06744-like [Sesamum indicum]                       |
| c22797.graph_c0 | 3.25709815    | 2.44526973    | 3.3135209     | 12.2526593     | 16.5563863     | 19.4684689     | 0.0005956 | 1.395534  | up        | PREDICTED: uncharacterized protein LOC105174672 [Sesamum indicum]                         |
| c22799.graph_c0 | 0.11530995    | 0.13851049    | 0.20744898    | 2.06088224     | 3.01604276     | 2.8735218      | 2.768E-10 | 3.077396  | up        | PREDICTED: uncharacterized protein LOC105170951 [Sesamum indicum]                         |
| c22800.graph_c0 | 1.43368979    | 1.15372827    | 1.11985868    | 0              | 0.02743601     | 0.02304407     | 2.977E-23 | -7.243938 | down      | -                                                                                         |
| c22803.graph_c0 | 3.70717423    | 2.83199225    | 3.25948703    | 0.80888464     | 0.76170239     | 0.15994237     | 2.684E-11 | -3.508675 | down      | -                                                                                         |
| c22827.graph_c0 | 0             | 0             | 0.10385382    | 8.115535       | 26.1866531     | 36.9007606     | 1.167E-07 | 8.353001  | up        | unnamed protein product [Coffea canephora]                                                |
| c22837.graph_c0 | 106.098355    | 108.183843    | 122.423567    | 3.51897568     | 2.8507685      | 2.72595402     | 2.4E-169  | -6.224503 | down      | PREDICTED: cytochrome P450 SOB1-like [Sesamum indicum]                                    |
| c22838.graph_c0 | 8.5955291     | 7.56645145    | 6.82717693    | 2.38756645     | 2.27640343     | 1.48710959     | 1.035E-24 | -2.913419 | down      | PREDICTED: uncharacterized protein LOC105171100 [Sesamum indicum]                         |
| c22841.graph_c0 | 1.60960748    | 1.99484289    | 2.06840934    | 0.14122623     | 0.2244181      | 0.06283112     | 3.695E-14 | -4.74859  | down      | -                                                                                         |
| c22844.graph_c0 | 0.54395153    | 0.27224811    | 0.34949962    | 4.63539353     | 5.4415171      | 5.46223566     | 6.504E-06 | 2.718931  | up        | PREDICTED: solute carrier family 35 member F1-like isoform X1 [Sesamum indicum]           |
| c22846.graph_c0 | 0.51988252    | 0.59474641    | 0.76350814    | 3.69475474     | 4.05911296     | 4.3834274      | 0.0010527 | 1.668502  | up        | PREDICTED: protein MIZU-KUSSEI 1-like [Sesamum indicum]                                   |
| c22852.graph_c0 | 0.11113576    | 0.11124705    | 0.14281386    | 6.04074538     | 5.31478687     | 4.64620279     | 7.075E-10 | 4.436768  | up        | -                                                                                         |
| c22852.graph_c1 | 5.48943407    | 4.93612437    | 4.06509769    | 61.2867063     | 64.3810017     | 67.72713       | 1.015E-35 | 2.722388  | up        | PREDICTED: HMGR-γ-related protein A-like [Sesamum indicum]                                |
| c22864.graph_c0 | 0.09697454    | 0.48535822    | 0             | 69.0592555     | 79.8796401     | 86.6479641     | 6.14E-106 | 7.65273   | up        | PREDICTED: NADPH--cytochrome P450 reductase-like [Sesamum indicum]                        |
| c22867.graph_c0 | 19.4633759    | 15.8027687    | 11.9497997    | 16.735536      | 10.3420748     | 14.1820755     | 0.000712  | -1.200795 | down      | -                                                                                         |
| c22874.graph_c0 | 20.5198645    | 13.9956729    | 16.1573764    | 14.1781782     | 17.3761485     | 13.3577552     | 3.011E-06 | -1.192264 | down      | PREDICTED: E3 ubiquitin-protein ligase SDIR1-like isoform X2 [Phoenix dactylifera]        |
| c22886.graph_c0 | 0             | 0.10780318    | 0.13839277    | 8.38374937     | 12.0347845     | 14.0368018     | 2.719E-23 | 6.090547  | up        | PREDICTED: alcohol dehydrogenase-like 4 [Sesamum indicum]                                 |
| c22889.graph_c0 | 29.676431     | 30.4608071    | 27.3905449    | 11.996707      | 12.9766155     | 13.0904278     | 7.262E-34 | -2.219345 | down      | PREDICTED: zinc finger protein 598 [Sesamum indicum]                                      |
| c22901.graph_c0 | 3.97972406    | 4.58730144    | 2.01464663    | 24.8869524     | 42.8426511     | 44.7828127     | 2.755E-07 | 2.390082  | up        | PREDICTED: laccase-14-like [Sesamum indicum]                                              |
| c22914.graph_c0 | 0.11743424    | 0             | 0.15090765    | 12.1170653     | 13.1803979     | 19.9268768     | 1.695E-16 | 6.36546   | up        | PREDICTED: hexose carrier protein HEX6-like [Sesamum indicum]                             |
| c22923.graph_c0 | 0.44268615    | 0.88625887    | 1.13773846    | 16.7210857     | 19.8742021     | 20.5393414     | 6.182E-18 | 3.50569   | up        | PREDICTED: uncharacterized protein LOC102582737 [Solanum tuberosum]                       |

| #ID             | 0 h-1<br>FPKM | 0 h-2<br>FPKM | 0 h-3<br>FPKM | 48 h-1<br>FPKM | 48 h-2<br>FPKM | 48 h-3<br>FPKM | FDR       | log2FC    | regulated | nr_annotation                                                                                                      |
|-----------------|---------------|---------------|---------------|----------------|----------------|----------------|-----------|-----------|-----------|--------------------------------------------------------------------------------------------------------------------|
| c22943.graph_c0 | 41.2114345    | 46.4975438    | 41.5638688    | 9.1899743      | 9.9323435      | 6.11223845     | 6.303E-65 | -3.372163 | down      | PREDICTED: dof zinc finger protein DOF3.1-like [Sesamum indicum]                                                   |
| c22951.graph_c0 | 441.109685    | 421.822618    | 432.806823    | 22.3193697     | 25.6288336     | 28.2849432     | 4.74E-204 | -5.107932 | down      | PREDICTED: 1-Cys peroxiredoxin [Phoenix dactylifera]                                                               |
| c22986.graph_c0 | 34.8029518    | 32.7689609    | 32.1551537    | 26.1806118     | 25.7540991     | 24.5660065     | 2.51E-21  | -1.398606 | down      | PREDICTED: mntj-family protein mc410 [Sesamum indicum]                                                             |
| c22991.graph_c0 | 5.41089771    | 4.92392355    | 5.82946542    | 66.4649587     | 65.0240129     | 78.7190847     | 7.175E-53 | 2.681205  | up        | PREDICTED: uncharacterized protein LOC105174944 [Sesamum indicum]                                                  |
| c22996.graph_c0 | 26.1039194    | 27.9591626    | 25.1584274    | 26.0206211     | 23.6422948     | 20.0716327     | 1.206E-13 | -1.197594 | down      | PREDICTED: putative F-box/LRR-repeat protein 23 [Sesamum indicum]                                                  |
| c22998.graph_c0 | 0.19127284    | 0.09573219    | 0.49158635    | 4.40532543     | 4.57356996     | 5.0957817      | 1.284E-07 | 3.143106  | up        | PREDICTED: probable ADP-ribosylation factor GTPase-activating protein AGD11 [Sesamum indicum]                      |
| c23011.graph_c0 | 0.33222277    | 0.16627772    | 0.42691942    | 3.82581611     | 5.02570544     | 6.39987375     | 1.167E-06 | 3.013148  | up        | -                                                                                                                  |
| c23025.graph_c0 | 16.4244684    | 11.6121148    | 16.2354555    | 8.57087144     | 7.0620659      | 6.7789421      | 1.312E-10 | -1.996465 | down      | PREDICTED: MATH domain-containing protein At5g43560-like [Sesamum indicum]                                         |
| c23026.graph_c0 | 8.11233381    | 6.11315309    | 6.44221188    | 0.16794632     | 0              | 0.22415643     | 1.076E-30 | -6.724315 | down      | -                                                                                                                  |
| c23036.graph_c0 | 1.90976021    | 1.99856675    | 1.8963635     | 10.3964289     | 12.8776222     | 8.75256641     | 0.000465  | 1.445309  | up        | PREDICTED: anthocyanidin 3-O-glucoside 2'&apos;&apos;&apos;-O-xylosyltransferase-like isoform X3 [Sesamum indicum] |
| c23056.graph_c0 | 7.20146288    | 9.84410328    | 8.75662917    | 43.8730242     | 44.5887936     | 36.8797573     | 9.676E-10 | 1.263201  | up        | PREDICTED: uncharacterized protein At1g66480-like [Sesamum indicum]                                                |
| c23065.graph_c0 | 0.03485174    | 0             | 0             | 1.573277       | 3.2313498      | 2.71407713     | 3.158E-11 | 6.745724  | up        | PREDICTED: beta-glucosidase 12-like [Sesamum indicum]                                                              |
| c23070.graph_c0 | 0.27430736    | 0             | 0.11749861    | 249.171896     | 254.954324     | 183.185694     | 4.805E-67 | 9.766117  | up        | PREDICTED: EG45-like domain containing protein [Sesamum indicum]                                                   |
| c23071.graph_c0 | 1.41954971    | 1.06572838    | 1.29212579    | 0.05449091     | 0.17317953     | 0.38788546     | 2.47E-10  | -3.654307 | down      | -                                                                                                                  |
| c23072.graph_c0 | 2.74060658    | 2.46198156    | 2.4381609     | 18.1269526     | 18.9289753     | 20.1039623     | 9.965E-10 | 1.885381  | up        | PREDICTED: protein RDM1 [Sesamum indicum]                                                                          |
| c23075.graph_c1 | 23.6754363    | 25.3668612    | 23.1559478    | 9.97667586     | 9.88444169     | 9.77568681     | 2.495E-41 | -2.301212 | down      | PREDICTED: E3 ubiquitin-protein ligase CIP8-like [Sesamum indicum]                                                 |
| c23078.graph_c0 | 0.09888119    | 0.29694062    | 0.12706625    | 3.09725736     | 4.43922812     | 2.83697747     | 4.918E-07 | 3.291544  | up        | PREDICTED: probable sugar phosphate/phosphate translocator At3g17430 [Nicotiana tomentosiformis]                   |
| c23084.graph_c1 | 0.81292692    | 0.48824456    | 1.25357193    | 9.43640835     | 11.2661565     | 8.92956794     | 3.217E-06 | 2.509619  | up        | PREDICTED: elongation of fatty acids protein 3-like [Populus euphratica]                                           |
| c23085.graph_c0 | 291.313747    | 326.521369    | 313.623422    | 107.451783     | 26.7746008     | 20.4686092     | 1.154E-78 | -3.576851 | down      | PREDICTED: zinc finger protein ZAF10-like [Sesamum indicum]                                                        |
| c23086.graph_c0 | 0             | 0.14711949    | 0             | 5.68682032     | 3.01224828     | 1.92765658     | 0.0005512 | 5.185773  | up        | myb family transcription factor family protein [Populus trichocarpa]                                               |
| c23103.graph_c0 | 0.55078956    | 0.39381507    | 0.20222468    | 10.7283777     | 21.1181703     | 23.9296152     | 1.658E-09 | 4.582844  | up        | PREDICTED: uncharacterized protein LOC105172657 [Sesamum indicum]                                                  |
| c23106.graph_c0 | 0             | 0             | 0             | 8.06836688     | 4.56846806     | 2.59935984     | 0.0001632 | Inf       | up        | -                                                                                                                  |

| #ID             | 0 h-1<br>FPKM | 0 h-2<br>FPKM | 0 h-3<br>FPKM | 48 h-1<br>FPKM | 48 h-2<br>FPKM | 48 h-3<br>FPKM | FDR       | log2FC    | regulated | nr_annotation                                                                     |
|-----------------|---------------|---------------|---------------|----------------|----------------|----------------|-----------|-----------|-----------|-----------------------------------------------------------------------------------|
| c23112.graph_c0 | 1160.41187    | 1150.0643     | 1254.61612    | 35.654924      | 27.7072295     | 24.9723216     | 1.51E-234 | -6.347187 | down      | hypothetical protein MIMGU_mgv1a018508mg [Erythranthe guttata]                    |
| c23113.graph_c0 | 8.81079134    | 7.42704338    | 9.53449743    | 97.404908      | 101.287845     | 96.0215708     | 1.393E-43 | 2.496112  | up        | -                                                                                 |
| c23115.graph_c0 | 2.11809863    | 2.43825252    | 1.53103534    | 20.1718802     | 20.336062      | 26.5000077     | 1.85E-21  | 2.444518  | up        | PREDICTED: probable glucan endo-1,3-beta-glucosidase A6 [Sesamum indicum]         |
| c23120.graph_c0 | 0.54008683    | 0.84955773    | 0.39659026    | 21.4662988     | 20.4066057     | 20.9979926     | 4.097E-25 | 4.125407  | up        | hypothetical protein MIMGU_mgv1a016344mg [Erythranthe guttata]                    |
| c23128.graph_c0 | 52.9299247    | 51.6512187    | 50.8601451    | 23.6808905     | 18.2240362     | 22.7848459     | 3.518E-52 | -2.278568 | down      | PREDICTED: omega-6 fatty acid desaturase, endoplasmic reticulum [Sesamum indicum] |
| c23144.graph_c0 | 0             | 0             | 0             | 7.1868246      | 10.4898065     | 13.0027464     | 3.278E-18 | Inf       | up        | PREDICTED: WAT1-related protein At2g39510-like [Sesamum indicum]                  |
| c23146.graph_c0 | 0.44216564    | 0.4426084     | 0.56820036    | 10.1837957     | 9.97935947     | 7.65695077     | 1.416E-13 | 3.241164  | up        | PREDICTED: uncharacterized protein LOC105156632 [Sesamum indicum]                 |
| c23151.graph_c0 | 0.41287815    | 0.4959499     | 0.74279068    | 18.94244       | 20.2284008     | 27.2114756     | 1.621E-25 | 4.301898  | up        | PREDICTED: copper transporter 6-like [Sesamum indicum]                            |
| c23152.graph_c0 | 132.359843    | 104.083664    | 138.333754    | 18.9331529     | 12.0583057     | 18.5513216     | 4.662E-38 | -3.933084 | down      | -                                                                                 |
| c23170.graph_c0 | 1.27508361    | 1.81635905    | 1.32343044    | 67.9964899     | 58.9195338     | 61.025484      | 3.699E-75 | 4.397972  | up        | PREDICTED: BES1/BZR1 homolog protein 2 [Sesamum indicum]                          |
| c23186.graph_c0 | 1.62755949    | 1.3033514     | 1.43415661    | 16.322192      | 24.0990145     | 25.1586254     | 3.706E-17 | 2.885053  | up        | PREDICTED: probable aquaporin SIP2-1 [Sesamum indicum]                            |
| c23190.graph_c0 | 0.20910292    | 0.20931231    | 0.4030583     | 23.8872673     | 31.3259622     | 44.8235185     | 2.419E-16 | 5.895477  | up        | hypothetical protein MIMGU_mgv1a015689mg [Erythranthe guttata]                    |
| c23198.graph_c0 | 0             | 0             | 0             | 13.9640752     | 23.7978281     | 29.1180693     | 2.507E-19 | Inf       | up        | PREDICTED: peroxidase 27-like [Sesamum indicum]                                   |
| c23198.graph_c1 | 0             | 0             | 0             | 6.16225127     | 10.9947924     | 14.4293003     | 3.035E-07 | Inf       | up        | hypothetical protein MIMGU_mgv1a009974mg [Erythranthe guttata]                    |
| c23201.graph_c0 | 0             | 0             | 0.23369216    | 23.2877278     | 57.5053938     | 70.8101302     | 5.234E-10 | 8.276369  | up        | PREDICTED: cytochrome P450 71D11-like [Beta vulgaris subsp. vulgaris]             |
| c23208.graph_c0 | 8.84916111    | 8.11985369    | 8.78708547    | 12.6609621     | 4.31825256     | 4.06662415     | 0.0017055 | -1.285877 | down      | PREDICTED: uncharacterized protein LOC105168502 [Sesamum indicum]                 |
| c23217.graph_c0 | 0             | 0             | 0             | 2.69427995     | 2.7400924      | 3.4521899      | 1.313E-11 | Inf       | up        | hypothetical protein MIMGU_mgv1a016855mg [Erythranthe guttata]                    |
| c23225.graph_c0 | 3.03923356    | 3.61629141    | 3.53708872    | 13.9468719     | 14.8869516     | 14.7601918     | 0.0001783 | 1.077062  | up        | PREDICTED: GATA transcription factor 15-like [Sesamum indicum]                    |
| c23230.graph_c0 | 6.11568512    | 6.50442212    | 5.54332949    | 26.4604677     | 23.5551187     | 23.812932      | 4.402E-06 | 1.009218  | up        | PREDICTED: tetraspanin-8-like [Sesamum indicum]                                   |
| c23258.graph_c1 | 10.1705138    | 12.3440963    | 12.4160372    | 0.46848703     | 1.24076301     | 0.72949965     | 1.046E-26 | -4.872693 | down      | -                                                                                 |
| c23259.graph_c0 | 12.7371725    | 14.3436677    | 13.412479     | 6.41041233     | 4.086143       | 5.02720695     | 1.039E-22 | -2.393419 | down      | PREDICTED: uncharacterized protein LOC105165738 [Sesamum indicum]                 |
| c23261.graph_c0 | 4.78251496    | 5.07569573    | 5.99763141    | 50.0581293     | 41.4459087     | 40.1959178     | 3.691E-16 | 2.03848   | up        | PREDICTED: uncharacterized protein LOC105161807 [Sesamum indicum]                 |

| #ID             | 0 h-1<br>FPKM | 0 h-2<br>FPKM | 0 h-3<br>FPKM | 48 h-1<br>FPKM | 48 h-2<br>FPKM | 48 h-3<br>FPKM | FDR       | log2FC    | regulated | nr_annotation                                                                                                   |
|-----------------|---------------|---------------|---------------|----------------|----------------|----------------|-----------|-----------|-----------|-----------------------------------------------------------------------------------------------------------------|
| c23266.graph_c0 | 1078.60554    | 1065.59275    | 1153.72731    | 726.334465     | 367.843646     | 249.882451     | 1.689E-26 | -2.295704 | down      | PREDICTED: stem-specific protein TSJT1-like [Sesamum indicum]                                                   |
| c23267.graph_c0 | 18.0768003    | 22.4951505    | 18.9639552    | 6.69447012     | 9.76241602     | 9.08212788     | 2.452E-32 | -2.244482 | down      | PREDICTED: U-box domain-containing protein 38-like [Sesamum indicum]                                            |
| c23279.graph_c0 | 0.13986943    | 0.35002371    | 0.3594755     | 5.73412934     | 7.09842622     | 9.28713929     | 7.948E-12 | 3.67389   | up        | unnamed protein product [Coffea canephora]                                                                      |
| c23283.graph_c0 | 0.14366147    | 0.35951331    | 0.09230534    | 43.0138522     | 55.1021802     | 75.369289      | 1.236E-26 | 7.169407  | up        | unnamed protein product [Coffea canephora]                                                                      |
| c23284.graph_c0 | 28.1138564    | 24.8633276    | 29.4631374    | 18.859455      | 28.5038095     | 23.0459474     | 0.0001229 | -1.252177 | down      | Zinc finger A20 and AN1 domain-containing stress-associated protein 8 [Morus notabilis]                         |
| c23287.graph_c0 | 0.04441129    | 0.08891152    | 0.11414053    | 3.35499531     | 6.11150868     | 6.0433204      | 5.093E-13 | 4.935001  | up        | PREDICTED: GDSL esterase/lipase At5g33370-like isoform X1 [Sesamum indicum]                                     |
| c23298.graph_c0 | 2.52925199    | 2.95374876    | 2.76867947    | 1.98491014     | 1.78278463     | 2.8412157      | 0.0009903 | -1.339991 | down      | hypothetical protein MIMGU_mgv1a008021mg [Erythranthe guttata]                                                  |
| c23300.graph_c0 | 11.854125     | 11.8242134    | 13.4093485    | 4.84514062     | 6.15125941     | 7.97225585     | 6.107E-21 | -1.992378 | down      | PREDICTED: uncharacterized protein LOC105160924 [Sesamum indicum]                                               |
| c23305.graph_c0 | 0.20244915    | 0.33775313    | 0.26015518    | 1.55424471     | 4.21512656     | 6.36160496     | 0.0082541 | 2.88711   | up        | PREDICTED: uncharacterized protein LOC105163284 [Sesamum indicum]                                               |
| c23307.graph_c0 | 0.59926318    | 0.59986325    | 1.30320708    | 8.57847896     | 9.89766741     | 8.84227962     | 4.768E-11 | 2.420007  | up        | PREDICTED: thermospermine synthase ACAULIS5-like [Sesamum indicum]                                              |
| c23310.graph_c0 | 8.59442473    | 6.22346905    | 4.22968444    | 24.5955472     | 28.1975889     | 27.8808521     | 0.0060889 | 1.068651  | up        | -                                                                                                               |
| c23312.graph_c0 | 0.20642916    | 0.16071679    | 0.29474405    | 5.62075765     | 7.5214878      | 8.19764636     | 6.174E-28 | 3.982298  | up        | PREDICTED: probable inactive receptor kinase At5g67200 [Sesamum indicum]                                        |
| c23318.graph_c0 | 0.8798262     | 0.73392268    | 0.94217625    | 12.2933914     | 15.1700649     | 15.3861426     | 3.433E-09 | 3.044455  | up        | -                                                                                                               |
| c23327.graph_c0 | 8.5912281     | 5.29989579    | 5.26328835    | 0              | 0              | 0              | 4.555E-23 | -Inf      | down      | --                                                                                                              |
| c23334.graph_c0 | 2.84465406    | 3.25428863    | 2.93744981    | 16.2388618     | 16.7073383     | 12.8669039     | 1.671E-06 | 1.326075  | up        | hypothetical protein MIMGU_mgv1a011374mg [Erythranthe guttata]                                                  |
| c23342.graph_c0 | 0.3251617     | 0.56960277    | 0.31338424    | 39.5419416     | 20.151577      | 12.7276112     | 0.0002089 | 4.908667  | up        | PREDICTED: beta-D-xylosidase 1 [Sesamum indicum]                                                                |
| c23343.graph_c0 | 0.16433457    | 0.5263972     | 0.33788228    | 8.1148108      | 10.1042809     | 10.5344006     | 1.043E-24 | 3.781734  | up        | PREDICTED: probable dolichyl-diphosphooligosaccharide--protein glycosyltransferase subunit 3B [Sesamum indicum] |
| c23352.graph_c0 | 2.81004587    | 1.92458822    | 1.8055101     | 16.282174      | 18.9089336     | 19.7009568     | 5.831E-10 | 2.052129  | up        | PREDICTED: phosphatidyl-N-methylethanolamine N-methyltransferase [Nicotiana glauca]                             |
| c23354.graph_c0 | 0             | 0             | 0             | 2.15284598     | 2.70302728     | 2.4122237      | 1.988E-11 | Inf       | up        | PREDICTED: putative late blight resistance protein homolog R1A-10 [Sesamum indicum]                             |
| c23358.graph_c1 | 3.30421376    | 3.09181445    | 2.03071741    | 28.0582667     | 32.8089317     | 35.9181768     | 2.23E-21  | 2.505389  | up        | PREDICTED: polyadenylate-binding protein-interacting protein 12 [Sesamum indicum]                               |
| c23362.graph_c0 | 25.4398285    | 23.3779827    | 23.8484887    | 5.95525991     | 5.69833939     | 5.64082248     | 3.167E-18 | -3.087064 | down      | -                                                                                                               |
| c23376.graph_c0 | 1.81058011    | 1.44251698    | 1.56693908    | 11.0293864     | 17.2740078     | 17.295452      | 5.621E-11 | 2.217231  | up        | 4-coumarate coenzyme A ligase [Paulownia fortunei]                                                              |



| #ID             | 0 h-1<br>FPKM | 0 h-2<br>FPKM | 0 h-3<br>FPKM | 48 h-1<br>FPKM | 48 h-2<br>FPKM | 48 h-3<br>FPKM | FDR       | log2FC    | regulated | nr_annotation                                                                  |
|-----------------|---------------|---------------|---------------|----------------|----------------|----------------|-----------|-----------|-----------|--------------------------------------------------------------------------------|
| c23377.graph_c0 | 8.47663396    | 7.43386797    | 8.86848267    | 37.8713008     | 40.9253806     | 42.1835617     | 6.092E-10 | 1.267448  | up        | PREDICTED: trafficking protein particle complex subunit 5 [Sesamum indicum]    |
| c23392.graph_c0 | 0.32761525    | 0.24595748    | 0.31574892    | 9.13007116     | 8.71297654     | 8.32530099     | 2.421E-12 | 3.862201  | up        | PREDICTED: uncharacterized protein LOC105168788 [Sesamum indicum]              |
| c23395.graph_c0 | 0.97939151    | 1.30716296    | 0.83903791    | 17.1433074     | 18.2674617     | 19.5358398     | 2.76E-22  | 3.119382  | up        | PREDICTED: uncharacterized protein LOC105176156 [Sesamum indicum]              |
| c23400.graph_c0 | 0.22027449    | 0.11024753    | 0.21229608    | 1.16685458     | 1.07490516     | 1.5348194      | 0.0010097 | 1.777829  | up        | hypothetical protein MIMGU_mgv1a026825mg [Erythranthe guttata]                 |
| c23407.graph_c0 | 0.50227045    | 0.33518227    | 0.43029161    | 7.44214914     | 10.6618562     | 13.5527561     | 5.484E-12 | 3.617022  | up        | PREDICTED: uncharacterized protein LOC105166016 [Sesamum indicum]              |
| c23414.graph_c0 | 18.4688862    | 18.2317941    | 20.8896348    | 13.4079308     | 16.4468259     | 13.116349      | 1.72E-10  | -1.443613 | down      | PREDICTED: mannan synthase 1-like [Sesamum indicum]                            |
| c23417.graph_c0 | 3.62999824    | 3.04211146    | 4.23076667    | 0              | 0              | 0              | 4.461E-25 | -Inf      | down      | -                                                                              |
| c23429.graph_c0 | 13.566255     | 13.698961     | 13.9159553    | 92.3654846     | 93.5527596     | 93.3557791     | 2.387E-29 | 1.743739  | up        | hypothetical protein MIMGU_mgv1a012296mg [Erythranthe guttata]                 |
| c23432.graph_c0 | 0             | 0             | 0             | 15.0345191     | 14.1880675     | 11.9937325     | 9.677E-25 | Inf       | up        | PREDICTED: beta-galactosidase-like [Sesamum indicum]                           |
| c23435.graph_c0 | 0.12181756    | 0             | 0             | 4.04014624     | 6.06339716     | 5.99149639     | 2.632E-11 | 6.042412  | up        | hypothetical protein MIMGU_mgv1a016138mg [Erythranthe guttata]                 |
| c23443.graph_c0 | 11.1443802    | 12.7330907    | 14.1763136    | 3.00748453     | 7.91023081     | 8.21267956     | 1.659E-09 | -2.02708  | down      | PREDICTED: LOW QUALITY PROTEIN: expansin-A11-like [Sesamum indicum]            |
| c23452.graph_c0 | 1.46810616    | 1.53637516    | 1.62931437    | 0.12295592     | 0.13025689     | 0.2735136      | 3.849E-12 | -4.162608 | down      | PREDICTED: uncharacterized protein LOC105168585 [Sesamum indicum]              |
| c23454.graph_c0 | 27.7416549    | 27.769434     | 28.5408402    | 24.3220179     | 16.4413079     | 18.3438199     | 1.144E-15 | -1.518675 | down      | hypothetical protein CICLE_v100253982mg, partial [Citrus clementina]           |
| c23455.graph_c0 | 10.5904054    | 11.5802199    | 9.23669179    | 4.74114555     | 3.90190801     | 6.20593734     | 4.455E-20 | -2.09669  | down      | anthocyanidin synthase [Ipomoea nil]                                           |
| c23458.graph_c0 | 1.12058316    | 1.19906424    | 0.94344417    | 11.5338894     | 10.7856932     | 11.5614713     | 7.419E-14 | 2.361568  | up        | PREDICTED: uncharacterized protein LOC105155953 [Sesamum indicum]              |
| c23463.graph_c0 | 1.2423378     | 0.96277301    | 1.80244722    | 5.50109255     | 6.64909991     | 5.32190557     | 0.0020952 | 1.0994    | up        | PREDICTED: uncharacterized protein LOC101217532 [Cucumis sativus]              |
| c23479.graph_c0 | 5.85683121    | 3.07093597    | 3.22553999    | 14.2172279     | 20.686782      | 17.6038753     | 0.0015256 | 1.092392  | up        | PREDICTED: heterogeneous nuclear ribonucleoprotein 1-like [Sesamum indicum]    |
| c23482.graph_c0 | 2.57401129    | 2.60962196    | 2.62920254    | 12.2215581     | 10.4673113     | 12.0108283     | 5.299E-06 | 1.135319  | up        | PREDICTED: serine/threonine-protein kinase AtPK2/AtPK19-like [Sesamum indicum] |
| c23483.graph_c0 | 7.19505335    | 6.69860369    | 5.6898021     | 6.4894919      | 6.53108829     | 6.68170258     | 0.0002257 | -1.00676  | down      | PREDICTED: uncharacterized protein LOC105168747 [Sesamum indicum]              |
| c23501.graph_c0 | 7.08762116    | 5.76445865    | 5.76357639    | 49.6350021     | 47.9347072     | 49.8387351     | 7.252E-27 | 1.969693  | up        | PREDICTED: protein transport protein Sec24-like At4g32640 [Sesamum indicum]    |

| #ID             | 0 h-1<br>FPKM | 0 h-2<br>FPKM | 0 h-3<br>FPKM | 48 h-1<br>FPKM | 48 h-2<br>FPKM | 48 h-3<br>FPKM | FDR       | log2FC    | regulated | nr_annotation                                                                                  |
|-----------------|---------------|---------------|---------------|----------------|----------------|----------------|-----------|-----------|-----------|------------------------------------------------------------------------------------------------|
| c23505.graph_c0 | 26.2081291    | 13.6700179    | 19.6135229    | 0              | 0              | 0              | 1.132E-26 | -Inf      | down      | cytochrome c oxidase subunit 2 (mitochondrion) [Gelidium vagum]                                |
| c23513.graph_c0 | 532.834615    | 566.225916    | 524.298132    | 54.2965876     | 18.5724985     | 10.1976813     | 7.35E-215 | -5.278443 | down      | PREDICTED: zinc finger protein ZAT10-like [Sesamum indicum]                                    |
| c23519.graph_c0 | 0             | 0             | 0.10339008    | 3.63197729     | 2.19865117     | 1.78073902     | 1.197E-05 | 5.164331  | up        | -                                                                                              |
| c23524.graph_c0 | 2.69133504    | 2.2001245     | 1.67159484    | 15.5377825     | 16.8543954     | 21.9147701     | 4.835E-13 | 2.031929  | up        | PREDICTED: uncharacterized protein LOC105161815 [Sesamum indicum]                              |
| c23535.graph_c0 | 1.10634827    | 0.9756161     | 1.08320102    | 6.6735965      | 7.81541581     | 7.12575124     | 6.314E-09 | 1.751675  | up        | PREDICTED: HIPL1 protein-like [Sesamum indicum]                                                |
| c23541.graph_c0 | 0             | 0             | 0             | 19.3321883     | 26.3502044     | 34.732024      | 1.869E-21 | Inf       | up        | PREDICTED: non-specific lipid transfer protein GPI-anchored 2-like [Nicotiana tomentosiformis] |
| c23552.graph_c0 | 0.57952362    | 0.29005196    | 0.49647386    | 5.78386205     | 5.18463889     | 6.72996741     | 1.381E-06 | 2.677593  | up        | PREDICTED: phosphoglycolate phosphatase 2 [Sesamum indicum]                                    |
| c23561.graph_c0 | 3.04000074    | 4.23852675    | 3.69724339    | 17.679084      | 22.1461317     | 24.2747386     | 2.369E-14 | 1.523057  | up        | PREDICTED: leukotriene A-4 hydrolase homolog [Sesamum indicum]                                 |
| c23565.graph_c0 | 6.30206352    | 7.00930453    | 8.818259      | 1.03215502     | 0.9567627      | 0.45920266     | 3.438E-16 | -4.19049  | down      | PREDICTED: protein CUP-SHAPED COTYLEDON 3 [Sesamum indicum]                                    |
| c23576.graph_c0 | 3.77063068    | 3.71970486    | 3.65161312    | 20.5404403     | 18.720091      | 20.6509472     | 2.674E-08 | 1.410732  | up        | PREDICTED: protein EARLY RESPONSIVE TO DEHYDRATION 15-like [Sesamum indicum]                   |
| c23578.graph_c0 | 0.45666827    | 0.71834016    | 0.8383383     | 3.00508998     | 7.00376259     | 7.75434188     | 0.0016325 | 2.104957  | up        | -                                                                                              |
| c23583.graph_c0 | 0.68228463    | 0.63743665    | 0.64295936    | 17.1388752     | 20.8201141     | 23.9750459     | 1.623E-38 | 3.958159  | up        | PREDICTED: glyoxylate/succinic semialdehyde reductase 2, chloroplastic [Sesamum indicum]       |
| c23586.graph_c0 | 1.16998165    | 0.557692      | 0.7159394     | 9.75209748     | 9.2980483      | 8.08364375     | 2.573E-09 | 2.460783  | up        | PREDICTED: glucan endo-1,3-beta-glucosidase 14-like [Sesamum indicum]                          |
| c23589.graph_c0 | 0.06590589    | 0             | 0             | 6.55741472     | 7.91161713     | 7.88771514     | 2.958E-19 | 7.406475  | up        | PREDICTED: calcium-dependent protein kinase 8-like [Sesamum indicum]                           |
| c23594.graph_c0 | 0.65757611    | 0.37613404    | 0.24143181    | 3.98098458     | 3.75896062     | 4.08129512     | 0.0001346 | 2.203852  | up        | PREDICTED: uncharacterized protein LOC105160721 [Sesamum indicum]                              |
| c23596.graph_c0 | 17.9611653    | 18.232775     | 16.6775121    | 10.4780357     | 9.80884743     | 9.64637757     | 2.756E-30 | -1.83587  | down      | PREDICTED: probable 1-acyl-sn-glycerol-3-phosphate acyltransferase 4 [Sesamum indicum]         |
| c23601.graph_c0 | 6.45407707    | 5.56097101    | 6.61399883    | 28.6006123     | 25.7540486     | 25.1138021     | 2.606E-05 | 1.076846  | up        | PREDICTED: uncharacterized protein LOC105163419 [Sesamum indicum]                              |
| c23610.graph_c1 | 0             | 0             | 0             | 5.99339004     | 6.5208719      | 5.76527829     | 1.077E-11 | Inf       | up        | hypothetical protein MIMGU_mgv1a005845mg [Erythranthe guttata]                                 |
| c23617.graph_c0 | 2.62195492    | 1.84692696    | 1.80944742    | 13.2853374     | 9.90406952     | 8.67685019     | 0.0005407 | 1.336029  | up        | PREDICTED: aesi-like protein At4g17480 [Sesamum indicum]                                       |
| c23621.graph_c0 | 2.01378169    | 1.95901514    | 1.89528223    | 8.30932677     | 9.79925896     | 10.5091265     | 1.085E-06 | 1.265475  | up        | PREDICTED: probable polygalacturonase [Sesamum indicum]                                        |
| c23632.graph_c0 | 6.01974268    | 5.40455708    | 5.10390609    | 28.4721468     | 36.8252501     | 39.9855324     | 7.775E-15 | 1.649913  | up        | -                                                                                              |
| c23633.graph_c0 | 132.335231    | 131.755553    | 135.313385    | 62.0815716     | 30.0568219     | 28.3281072     | 2.675E-75 | -2.73117  | down      | conserved hypothetical protein [Ricinus communis]                                              |

| #ID             | 0 h-1<br>FPKM | 0 h-2<br>FPKM | 0 h-3<br>FPKM | 48 h-1<br>FPKM | 48 h-2<br>FPKM | 48 h-3<br>FPKM | FDR       | log2FC    | regulated | nr_annotation                                                                                           |
|-----------------|---------------|---------------|---------------|----------------|----------------|----------------|-----------|-----------|-----------|---------------------------------------------------------------------------------------------------------|
| c23637.graph_c0 | 0.21509725    | 0.35885439    | 0.64495311    | 5.48247128     | 6.99760668     | 6.99414612     | 7.382E-09 | 2.965806  | up        | PREDICTED: uncharacterized acetyltransferase At3g50280-like [Sesamum indicum]                           |
| c23640.graph_c0 | 0             | 0.15067557    | 0             | 6.65631835     | 4.33377258     | 3.39324335     | 1.68E-07  | 5.581971  | up        | -                                                                                                       |
| c23650.graph_c0 | 0.46338178    | 0.49476884    | 0.27788317    | 33.5256855     | 41.9081444     | 53.4323528     | 1.222E-33 | 5.685945  | up        | PREDICTED: glucan endo-1,3-beta-glucosidase 3 [Sesamum indicum]                                         |
| c23652.graph_c0 | 25.0259724    | 23.9043299    | 26.384268     | 10.3100559     | 9.20221405     | 9.46276513     | 1.112E-27 | -2.394282 | down      | PREDICTED: uncharacterized protein LOC105169025 [Sesamum indicum]                                       |
| c23690.graph_c0 | 3.50055966    | 3.17034447    | 4.391254      | 48.8348645     | 51.3278987     | 58.2105808     | 6.3E-36   | 2.817296  | up        | PREDICTED: uncharacterized protein LOC105170479 [Sesamum indicum]                                       |
| c23691.graph_c0 | 1.30835682    | 2.73839451    | 1.68129031    | 7.23206183     | 9.983157       | 13.3575937     | 0.0024061 | 1.391665  | up        | -                                                                                                       |
| c23713.graph_c1 | 10.2787059    | 11.1869475    | 9.94243137    | 6.85241256     | 7.80648365     | 6.71002298     | 1.243E-14 | -1.573753 | down      | PREDICTED: uncharacterized protein LOC105162910 isoform X1 [Sesamum indicum]                            |
| c23716.graph_c0 | 0.29654297    | 0.29683991    | 0             | 52.7265817     | 62.5140036     | 38.4077495     | 1.632E-21 | 7.015474  | up        | hypothetical protein [Arachis diogoi]                                                                   |
| c23716.graph_c1 | 0.12336449    | 0.24697603    | 0             | 183.660679     | 158.927853     | 117.306556     | 7.567E-37 | 9.28094   | up        | PREDICTED: abscisic acid receptor PYL4-like [Sesamum indicum]                                           |
| c23720.graph_c0 | 1.72191326    | 0.86181875    | 0.66381801    | 5.86945358     | 8.57072141     | 9.73945163     | 0.0006736 | 1.878927  | up        | unnamed protein product [Coffea canephora]                                                              |
| c23732.graph_c0 | 0.53606001    | 0.1341492     | 1.37771668    | 5.18546123     | 5.88575078     | 6.59141745     | 7.507E-05 | 2.07213   | up        | PREDICTED: methylsterol monooxygenase 1-1-like [Sesamum indicum]                                        |
| c23737.graph_c0 | 9.56463597    | 6.58227178    | 7.16971261    | 0              | 0              | 0              | 3.512E-24 | -Inf      | down      | hypothetical protein BOTBODRAFT_366584 [Botryobasidium botryosum FD-172 SS1]                            |
| c23761.graph_c0 | 2.8079309     | 3.64355525    | 2.53917575    | 2.49103987     | 2.02996515     | 2.64276466     | 0.0045081 | -1.341304 | down      | -                                                                                                       |
| c23783.graph_c0 | 0.05184724    | 0             | 0             | 0.6925934      | 0.63251615     | 0.68001704     | 1.005E-08 | 4.278368  | up        | PREDICTED: putative late blight resistance protein homolog R1A-10 [Sesamum indicum]                     |
| c23800.graph_c0 | 2.46207885    | 2.83422588    | 3.63844912    | 1.47434796     | 2.76334895     | 1.91734254     | 0.0020692 | -1.56792  | down      | -                                                                                                       |
| c23802.graph_c0 | 0.32865828    | 0.14099459    | 0             | 67.4770084     | 80.5566406     | 104.416825     | 2.815E-50 | 8.065965  | up        | PREDICTED: nicotianamine synthase-like [Sesamum indicum]                                                |
| c23803.graph_c1 | 5.49089093    | 4.08877735    | 5.85132722    | 39.6048772     | 44.8320929     | 47.3162562     | 5.697E-24 | 2.071947  | up        | hypothetical protein MIMGU_mgv1a015927mg [Erythranthe guttata]                                          |
| c23816.graph_c0 | 5.29489973    | 4.18436982    | 3.10365001    | 0.51347442     | 0.99726713     | 1.4468071      | 1.089E-10 | -3.114836 | down      | PREDICTED: elongation of fatty acids protein 3-like [Sesamum indicum]                                   |
| c23825.graph_c0 | 92.7354826    | 104.654642    | 96.7769624    | 18.3889301     | 21.0077185     | 25.1184328     | 1.77E-102 | -3.210171 | down      | PREDICTED: zinc finger A20 and AN1 domain-containing stress-associated protein 5-like [Sesamum indicum] |
| c23833.graph_c0 | 79.4240499    | 80.931372     | 75.1502342    | 36.6654331     | 42.6793039     | 46.2278054     | 6.9E-42   | -1.927434 | down      | PREDICTED: U3 small nucleolar RNA-associated protein 15 homolog [Sesamum indicum]                       |
| c23834.graph_c0 | 0.14383872    | 0             | 0             | 2.91529954     | 3.43936163     | 3.59624945     | 1.575E-10 | 5.112761  | up        | hypothetical protein MIMGU_mgv1a026155mg [Erythranthe guttata]                                          |
| c23837.graph_c0 | 0.46977167    | 0.70536311    | 1.60980051    | 5.77045736     | 7.03006485     | 4.62106643     | 0.0004254 | 1.61437   | up        | -                                                                                                       |

| #ID             | 0 h-1<br>FPKM | 0 h-2<br>FPKM | 0 h-3<br>FPKM | 48 h-1<br>FPKM | 48 h-2<br>FPKM | 48 h-3<br>FPKM | FDR       | log2FC    | regulated | nr_annotation                                                                                    |
|-----------------|---------------|---------------|---------------|----------------|----------------|----------------|-----------|-----------|-----------|--------------------------------------------------------------------------------------------------|
| c23837.graph_c1 | 8.75419606    | 8.05879547    | 8.78866291    | 41.9448701     | 41.2697126     | 40.9103592     | 1.202E-14 | 1.260094  | up        | PREDICTED: protein FAR1-RELATED SEQUENCE 7-like [Sesamum indicum]                                |
| c23840.graph_c0 | 0             | 0.04599782    | 0.05904989    | 6.09606715     | 11.480967      | 13.0332527     | 1.665E-14 | 7.144673  | up        | Integrase, catalytic region, putative [Theobroma cacao]                                          |
| c23846.graph_c0 | 18.973588     | 16.6566005    | 13.038402     | 4.01939782     | 2.47561896     | 2.07932326     | 7.914E-29 | -3.507347 | down      | PREDICTED: galactinol--sucrose galactosyltransferase [Sesamum indicum]                           |
| c23859.graph_c0 | 3.88167234    | 4.27411517    | 2.32778123    | 0              | 0              | 0              | 5.72E-19  | -Inf      | down      | putative histone h2a protein [Eutypa lata UCREL1]                                                |
| c23864.graph_c0 | 0.84448869    | 0.46963017    | 0.7234676     | 45.8154412     | 34.7077506     | 38.1511072     | 9.089E-32 | 4.851159  | up        | PREDICTED: histone H2AX-like [Sesamum indicum]                                                   |
| c23865.graph_c0 | 0             | 0             | 0             | 2.94417297     | 3.7970365      | 3.53090998     | 1.272E-11 | Inf       | up        | predicted protein [Physcomitrella patens]                                                        |
| c23868.graph_c0 | 0             | 0             | 0             | 2.18072062     | 5.54450177     | 5.14203905     | 5.132E-07 | Inf       | up        | PREDICTED: uncharacterized protein LOC105162633 [Sesamum indicum]                                |
| c23876.graph_c0 | 5.41358174    | 7.90271215    | 5.79722239    | 1.87025422     | 3.96261514     | 3.88299558     | 4.821E-05 | -2.005132 | down      | hypothetical protein, partial [Oryza eichingeri]                                                 |
| c23891.graph_c0 | 56.3928194    | 51.347141     | 61.1788759    | 21.0808247     | 21.697528      | 21.5134457     | 1.783E-42 | -2.412806 | down      | -                                                                                                |
| c23894.graph_c0 | 0.90172026    | 0.77367702    | 0.6621407     | 4.27229237     | 7.16612823     | 6.23017066     | 0.00055   | 1.895113  | up        | PREDICTED: uncharacterized protein LOC105169824 isoform X1 [Sesamum indicum]                     |
| c23905.graph_c0 | 3.30542899    | 6.47961363    | 4.24760712    | 38.6991216     | 41.9379422     | 44.0306748     | 1.772E-12 | 2.132343  | up        | PREDICTED: macrophage migration inhibitory factor homolog [Sesamum indicum]                      |
| c23907.graph_c0 | 0.21602463    | 0.07208032    | 0.2776002     | 3.64862628     | 3.65444383     | 3.60069217     | 9.425E-08 | 3.244783  | up        | hypothetical protein MIMGU_mgv1a015138mg [Erythranthe guttata]                                   |
| c23921.graph_c0 | 5.20574368    | 3.39844986    | 4.07192236    | 84.4490262     | 87.696323      | 88.6863918     | 1.801E-27 | 3.345981  | up        | PREDICTED: pecunesterase-like isoform A2 [Sesamum indicum]                                       |
| c23936.graph_c0 | 0.36167337    | 0.24135702    | 0             | 91.0738733     | 98.1289745     | 100.900929     | 2.9E-106  | 7.908522  | up        | actin [Ipomoea nil]                                                                              |
| c23939.graph_c0 | 3.83367221    | 2.16902798    | 3.85545957    | 27.4868422     | 32.5351691     | 23.774453      | 8.772E-08 | 2.066974  | up        | hypothetical protein PHAVU_002G125500g [Phaseolus vulgaris]                                      |
| c23950.graph_c0 | 1.51443986    | 2.01028993    | 1.39612611    | 0.8189222      | 1.38165174     | 2.18601614     | 0.0044824 | -1.193044 | down      | PREDICTED: LOW QUALITY PROTEIN: P/ACA ribonucleoprotein complex subunit 4-like [Sesamum indicum] |
| c23951.graph_c0 | 14.6767768    | 12.9106888    | 14.7167019    | 0.35851678     | 0.54257865     | 1.36716888     | 2.622E-68 | -5.252318 | down      | PREDICTED: uncharacterized protein LOC105166244 [Sesamum indicum]                                |
| c23961.graph_c0 | 0.26908484    | 0.20201572    | 0.08644617    | 1.67331492     | 1.96963807     | 2.26093066     | 6.456E-05 | 2.392383  | up        | PREDICTED: N-acetyltransferase 10 [Sesamum indicum]                                              |
| c23962.graph_c0 | 37.7891168    | 37.0900681    | 40.0466553    | 21.4760449     | 19.3984474     | 15.4885546     | 5.03E-13  | -2.042254 | down      | PREDICTED: NAC transcription factor 25-like [Sesamum indicum]                                    |
| c23967.graph_c0 | 0.13759129    | 0.27545813    | 0             | 9.82375041     | 8.25851549     | 12.2375597     | 4.779E-19 | 5.195228  | up        | PREDICTED: high mobility group B protein 7-like [Sesamum indicum]                                |
| c23973.graph_c0 | 0.15981051    | 0.07998527    | 0             | 13.6185774     | 11.229845      | 14.4102715     | 2.199E-23 | 6.357397  | up        | PREDICTED: transcription factor MYB1R1-like [Malus domestica]                                    |
| c23976.graph_c0 | 1.9675891     | 1.0743051     | 1.89632242    | 0              | 0              | 0              | 1.091E-17 | -Inf      | down      | predicted protein [Physcomitrella patens]                                                        |
| c23978.graph_c0 | 28.5261757    | 31.8144139    | 33.811724     | 26.1601729     | 24.0268687     | 32.7802271     | 2.644E-08 | -1.202262 | down      | PREDICTED: ran-binding protein 6 isoform X2 [Elaeis guineensis]                                  |

| #ID             | 0 h-1<br>FPKM | 0 h-2<br>FPKM | 0 h-3<br>FPKM | 48 h-1<br>FPKM | 48 h-2<br>FPKM | 48 h-3<br>FPKM | FDR       | log2FC    | regulated | nr_annotation                                                                              |
|-----------------|---------------|---------------|---------------|----------------|----------------|----------------|-----------|-----------|-----------|--------------------------------------------------------------------------------------------|
| c23979.graph_c0 | 0.04907925    | 0.1965136     | 0.06306879    | 22.9240102     | 24.6684077     | 28.8463758     | 4.739E-67 | 6.936201  | up        | PREDICTED: ferredoxin--NADP reductase, leaf isozyme, chloroplastic isoform 1 [Glycine max] |
| c23985.graph_c0 | 0.35236662    | 1.32269797    | 0.45280505    | 4.46356777     | 6.53407763     | 8.73764266     | 0.0002055 | 2.190917  | up        | hypothetical protein MIMGU_mgv1a016798mg [Erythranthe guttata]                             |
| c23986.graph_c0 | 0.78002256    | 0.39040182    | 1.33647983    | 5.98839715     | 7.10525832     | 9.2714852      | 3.647E-05 | 2.125626  | up        | PREDICTED: uncharacterized protein LOC105178874 isoform X1 [Sesamum indicum]               |
| c23987.graph_c0 | 0.16019151    | 0.04008798    | 0.20585244    | 10.6625734     | 14.3443711     | 15.2981733     | 3.921E-40 | 5.602462  | up        | PREDICTED: lysophospholipid acyltransferase 1-like [Sesamum indicum]                       |
| c23990.graph_c0 | 0.50516519    | 1.01134208    | 0.32457864    | 5.35199793     | 6.65584377     | 7.45384003     | 5.66E-05  | 2.386165  | up        | PREDICTED: phosphoribosylformylglycinamidine cycloligase, chloroplastic [Sesamum indicum]  |
| c23994.graph_c0 | 31.4707959    | 29.7994816    | 31.2872942    | 18.5613648     | 25.4224869     | 28.3252349     | 1.679E-17 | -1.380206 | down      | PREDICTED: transmembrane and coiled-coil domain-containing protein 1 [Sesamum indicum]     |
| c24000.graph_c1 | 8.15317622    | 5.38480191    | 6.91276156    | 25.7860017     | 29.1218782     | 30.523404      | 3.169E-05 | 1.042953  | up        | NADP-malic enzyme, partial [Flaveria trinervia]                                            |
| c24007.graph_c0 | 13.3183623    | 14.3071888    | 12.9701411    | 6.07074446     | 8.4919247      | 8.52101034     | 4.808E-29 | -1.83745  | down      | PREDICTED: uncharacterized protein LOC105164548 [Sesamum indicum]                          |
| c24030.graph_c0 | 0             | 0.06804536    | 0.08735351    | 5.38575964     | 10.2169317     | 11.0332427     | 7.875E-13 | 6.379249  | up        | PREDICTED: uncharacterized protein LOC105166144 [Sesamum indicum]                          |
| c24031.graph_c0 | 8.38389819    | 9.41297773    | 12.0839488    | 0.62625356     | 0.55286642     | 0.83585497     | 5.801E-25 | -4.912606 | down      | hypothetical protein MIMGU_mgv1a025777mg, partial [Erythranthe guttata]                    |
| c24033.graph_c0 | 2.20737218    | 1.38741228    | 2.17689537    | 0              | 0              | 0              | 2.06E-23  | -Inf      | down      | CK1/CK1/CK1-D protein kinase [Coniosporium apollinis CBS 100218]                           |
| c24064.graph_c0 | 30.9563711    | 29.2147867    | 30.2565219    | 11.1175873     | 11.5857073     | 13.9245752     | 1.556E-37 | -2.323439 | down      | PREDICTED: 21 kDa protein [Sesamum indicum]                                                |
| c24065.graph_c0 | 3.69052017    | 3.36584095    | 3.26703113    | 26.9351428     | 26.0532553     | 21.781823      | 1.922E-18 | 1.842128  | up        | PREDICTED: zinc finger CCCH domain-containing protein 53 [Sesamum indicum]                 |
| c24089.graph_c0 | 5.80369921    | 6.52878349    | 7.60004008    | 1.83317014     | 0.9170657      | 1.04211963     | 4.212E-21 | -3.400669 | down      | PREDICTED: ubiquitin-conjugating enzyme E2 5B-like isoform X1 [Citrus sinensis]            |
| c24097.graph_c0 | 0.46148536    | 0.92389494    | 0.55596278    | 3.29491573     | 2.44902452     | 3.94846747     | 0.0019152 | 1.305043  | up        | PREDICTED: protein S-acyltransferase 18 isoform X4 [Sesamum indicum]                       |
| c24100.graph_c0 | 2.07410805    | 1.64364642    | 2.55425634    | 0.15923363     | 0.08434436     | 0              | 4.873E-16 | -5.681464 | down      | hypothetical protein MIMGU_mgv1a023310mg [Erythranthe guttata]                             |
| c24101.graph_c0 | 0.970612      | 1.7272603     | 0.41575828    | 68.2565856     | 66.4153456     | 75.8515705     | 4.698E-68 | 5.069993  | up        | PREDICTED: methionine gamma-lyase [Sesamum indicum]                                        |
| c24101.graph_c1 | 0.44213769    | 1.32774128    | 0.75755258    | 28.7843763     | 26.6099431     | 35.1563208     | 3.405E-20 | 4.144755  | up        | PREDICTED: methionine gamma-lyase [Sesamum indicum]                                        |
| c24103.graph_c0 | 4.20368666    | 2.08311684    | 2.78117819    | 0              | 0              | 0              | 8.667E-18 | -Inf      | down      | isocitrate dehydrogenase [Lichtheimia corymbifera JMRC:FSU:9682]                           |
| c24109.graph_c0 | 3.2107792     | 2.99972803    | 3.64461425    | 51.4688386     | 52.4359133     | 54.6357699     | 7.277E-77 | 2.98805   | up        | PREDICTED: dihydroxy-acid dehydratase, chloroplastic [Sesamum indicum]                     |

| #ID             | 0 h-1<br>FPKM | 0 h-2<br>FPKM | 0 h-3<br>FPKM | 48 h-1<br>FPKM | 48 h-2<br>FPKM | 48 h-3<br>FPKM | FDR       | log2FC    | regulated | nr_annotation                                                                         |
|-----------------|---------------|---------------|---------------|----------------|----------------|----------------|-----------|-----------|-----------|---------------------------------------------------------------------------------------|
| c24115.graph_c0 | 0             | 0             | 0             | 1.35079942     | 4.01477299     | 3.13838114     | 1.467E-07 | Inf       | up        | PREDICTED: geraniol 8-hydroxylase-like isoform X1 [Beta vulgaris subsp. vulgaris]     |
| c24143.graph_c0 | 10.6053634    | 12.1088557    | 10.3809407    | 9.38869809     | 10.2292088     | 10.5953261     | 9.808E-09 | -1.150004 | down      | PREDICTED: phosphoglycerate mutase-like protein 1 isoform X1 [Sesamum indicum]        |
| c24146.graph_c0 | 0.07800556    | 0.23425102    | 0.10024023    | 5.96469632     | 3.7304187      | 2.49381549     | 7.317E-05 | 3.883251  | up        | PREDICTED: glutamate decarboxylase [Sesamum indicum]                                  |
| c24157.graph_c0 | 19.1514645    | 21.5201521    | 21.0696413    | 19.8686121     | 18.0936435     | 18.8780185     | 5.891E-13 | -1.135811 | down      | PREDICTED: plant intracellular Ras-group-related LRR protein 1-like [Sesamum indicum] |
| c24169.graph_c0 | 0             | 0             | 0             | 7.39352263     | 6.07021906     | 7.72998658     | 8.675E-12 | Inf       | up        | PREDICTED: 2-hydroxyisoflavanone dehydratase-like [Sesamum indicum]                   |
| c24197.graph_c0 | 0.61769397    | 0.53587083    | 0.3704219     | 31.336236      | 37.2963226     | 39.2924608     | 1.461E-89 | 5.129675  | up        | PREDICTED: very-long-chain enoyl-CoA reductase [Sesamum indicum]                      |
| c24236.graph_c0 | 2.24508714    | 3.06953109    | 2.53319344    | 24.4667206     | 20.0943112     | 17.1918362     | 4.438E-09 | 1.963956  | up        | PREDICTED: uncharacterized protein LOC102578886 [Solanum tuberosum]                   |
| c24237.graph_c1 | 0.18130731    | 0.36297771    | 0             | 5.45638245     | 4.54172367     | 5.8954255      | 8.423E-11 | 3.866776  | up        | hypothetical protein MIMGU_mgv1a021532mg [Erythranthe guttata]                        |
| c24238.graph_c0 | 1080.13099    | 1042.58625    | 1033.19528    | 10.754469      | 11.5512928     | 13.2906415     | 0         | -7.489689 | down      | -                                                                                     |
| c24238.graph_c1 | 0.55953365    | 0             | 0.4793486     | 13.5742776     | 15.1084177     | 13.7601007     | 1.26E-11  | 4.3299    | up        | PREDICTED: metalloproteinase-like protein 1 [Sesamum indicum]                         |
| c24240.graph_c0 | 10.0380567    | 4.77285144    | 8.70702768    | 39.0715856     | 34.0439846     | 36.8228016     | 0.0011449 | 1.208769  | up        | PREDICTED: nudix hydrolase 26, chloroplastic isoform X2 [Vitis vinifera]              |
| c24241.graph_c0 | 5.79789672    | 6.33942882    | 7.22127985    | 100.171806     | 108.644473     | 115.528291     | 8.68E-63  | 3.044966  | up        | PREDICTED: 14 kDa zinc-binding protein-like [Sesamum indicum]                         |
| c24245.graph_c0 | 1.09180025    | 0.81967014    | 0.35075164    | 7.0408632      | 5.59420561     | 5.81742361     | 0.0004447 | 2.024238  | up        | -                                                                                     |
| c24247.graph_c0 | 0.14473161    | 0.36219135    | 0.27897878    | 27.867266      | 74.5112408     | 94.9133998     | 7.806E-09 | 6.935714  | up        | PREDICTED: cytochrome P450 71D11-like [Sesamum indicum]                               |
| c24250.graph_c0 | 0.5241299     | 0.07495068    | 0.19243648    | 6.20823402     | 8.6960852      | 11.4163686     | 6.361E-11 | 4.037241  | up        | hypothetical protein MIMGU_mgv1a016982mg [Erythranthe guttata]                        |
| c24255.graph_c0 | 50.4433572    | 51.7964418    | 48.0342978    | 24.0468185     | 16.4601848     | 13.8670789     | 4.737E-67 | -2.474185 | down      | PREDICTED: uncharacterized protein LOC105164653 isoform X2 [Sesamum indicum]          |
| c24261.graph_c0 | 0.4936893     | 0.14119533    | 0.54378026    | 2.14414572     | 3.3727775      | 2.77505159     | 0.000852  | 1.785316  | up        | -                                                                                     |
| c24269.graph_c0 | 6.36450519    | 7.77156782    | 5.16240469    | 26.4476644     | 28.5026832     | 28.3801731     | 2.503E-08 | 1.094437  | up        | unknown [Glycine max]                                                                 |
| c24270.graph_c0 | 7.26712524    | 6.96703306    | 9.60160122    | 194.530724     | 190.698008     | 232.16011      | 3.947E-75 | 3.673008  | up        | PREDICTED: peptidyl-prolyl cis-trans isomerase FKBP12 [Sesamum indicum]               |
| c24272.graph_c0 | 2.34945165    | 1.50515473    | 2.17377964    | 0              | 0              | 0              | 4.107E-25 | -Inf      | down      | PREDICTED: acyl-[acyl-carrier-protein] desaturase 6, chloroplastic [Sesamum indicum]  |
| c24284.graph_c0 | 0             | 0.07344123    | 0             | 2.36569086     | 2.07653474     | 2.34554636     | 4.272E-10 | 5.526041  | up        | -                                                                                     |
| c24286.graph_c0 | 1.26591511    | 0             | 0.29577291    | 4.02884141     | 3.93111614     | 4.05652818     | 0.0007887 | 1.937628  | up        | PREDICTED: topiress-related protein 3-like [Sesamum indicum]                          |

| #ID             | 0 h-1<br>FPKM | 0 h-2<br>FPKM | 0 h-3<br>FPKM | 48 h-1<br>FPKM | 48 h-2<br>FPKM | 48 h-3<br>FPKM | FDR       | log2FC    | regulated | nr_annotation                                                                   |
|-----------------|---------------|---------------|---------------|----------------|----------------|----------------|-----------|-----------|-----------|---------------------------------------------------------------------------------|
| c24289.graph_c0 | 6.27219362    | 6.27847428    | 5.09053714    | 34.6701232     | 53.1600931     | 36.5320269     | 2.506E-05 | 1.796764  | up        | hypothetical protein MIMGU_mgv1a018579mg<br>[Erythranthe guttata]               |
| c24294.graph_c0 | 14.4379166    | 16.877269     | 13.5725443    | 10.9801444     | 10.5918596     | 8.34030062     | 2.499E-09 | -1.599224 | down      | ZPT2-14 [Petunia x hybrida]                                                     |
| c24300.graph_c0 | 5.5979338     | 2.66168116    | 2.69758746    | 0              | 0              | 0              | 1.112E-09 | -Inf      | down      | --                                                                              |
| c24309.graph_c0 | 1.10159605    | 1.55898842    | 0.97627209    | 14.0330936     | 11.9375767     | 9.99547754     | 2.704E-11 | 2.295701  | up        | PREDICTED: chitotriosidase-1 [Vitis vinifera]                                   |
| c24323.graph_c0 | 4.45600816    | 3.95866728    | 3.57884181    | 43.1555508     | 88.8267915     | 113.143976     | 1.057E-05 | 3.324486  | up        | PREDICTED: alpha-xylosidase 1 [Sesamum indicum]                                 |
| c24336.graph_c0 | 4.4781711     | 1.73193501    | 3.13888754    | 72.5727609     | 54.2346175     | 40.5469714     | 7.23E-08  | 3.154074  | up        | PREDICTED: hydroxymethylglutaryl-CoA synthase<br>isoform X4 [Sesamum indicum]   |
| c24341.graph_c0 | 0.78328947    | 0.52271588    | 0.33551933    | 4.93105187     | 5.47867356     | 4.3876203      | 0.0002057 | 2.161494  | up        | PREDICTED: methylsterol monooxygenase 1-1-like<br>[Sesamum indicum]             |
| c24348.graph_c0 | 0.42416922    | 0.08491879    | 0.2180297     | 8.28437383     | 13.8267958     | 19.0543375     | 9.841E-09 | 4.798724  | up        | hypothetical protein MIMGU_mgv1a011727mg<br>[Erythranthe guttata]               |
| c24351.graph_c0 | 35.2569645    | 30.0166206    | 30.5936288    | 177.138733     | 189.253335     | 186.667368     | 5.09E-19  | 1.510704  | up        | 40S ribosomal protein S13, putative [Ricinus communis]                          |
| c24361.graph_c0 | 1.44073375    | 1.44217643    | 1.38854993    | 7.30013846     | 5.62444474     | 10.2355213     | 0.0036743 | 1.421408  | up        | unnamed protein product [Coffea canephora]                                      |
| c24366.graph_c0 | 1.04162414    | 0.80205167    | 0.72074599    | 46.578095      | 74.367663      | 68.6369726     | 8.703E-31 | 5.185805  | up        | PREDICTED: chaperone protein dnaJ 20, chloroplastic-like<br>[Sesamum indicum]   |
| c24370.graph_c0 | 0             | 0.0785848     | 0             | 2.09742547     | 2.45182672     | 2.1880484      | 5.858E-10 | 5.413905  | up        | hypothetical protein SELMODRAFT_117229, partial<br>[Selaginella moellendorffii] |
| c24372.graph_c0 | 0             | 0             | 0             | 4.17022757     | 4.25113911     | 8.26143251     | 1.271E-08 | Inf       | up        | early dehydration-responsive 1 [Lindernia subracemosa]                          |
| c24386.graph_c0 | 7.79322947    | 7.19157749    | 6.49384765    | 5.44081435     | 4.69429652     | 5.34029707     | 9.6E-07   | -1.486846 | down      | PREDICTED: uncharacterized protein LOC105125740<br>[Populus euphratica]         |
| c24393.graph_c0 | 1.01263412    | 0.25341203    | 1.4639343     | 5.71404067     | 4.32380945     | 4.8767958      | 0.004884  | 1.428274  | up        | PREDICTED: serine/threonine-protein kinase STE20<br>[Sesamum indicum]           |
| c24395.graph_c0 | 0.68860663    | 0.34464808    | 0.70790943    | 5.01167583     | 7.39264446     | 8.80582286     | 7.319E-08 | 2.578446  | up        | PREDICTED: uncharacterized protein LOC104250007<br>[Nicotiana glauca]           |
| c24399.graph_c0 | 8.34825316    | 7.66842104    | 8.96089816    | 33.5687579     | 37.1915555     | 41.4627457     | 1.347E-06 | 1.146361  | up        | putative DNA binding protein [Atriplex canescens]                               |
| c24403.graph_c0 | 4.7488648     | 6.90041623    | 7.67731265    | 2.11691806     | 3.88720453     | 1.6324715      | 5.617E-07 | -2.367304 | down      | -                                                                               |
| c24417.graph_c0 | 10.0718919    | 11.2126664    | 12.0355756    | 0.26015562     | 0.27560333     | 0.27006572     | 1.273E-76 | -6.389688 | down      | PREDICTED: transcription factor TGA3 [Sesamum<br>indicum]                       |
| c24418.graph_c0 | 0             | 0             | 0             | 2.03043312     | 2.76556846     | 3.17088526     | 3.002E-14 | Inf       | up        | PREDICTED: patatin-like protein 1 [Sesamum indicum]                             |
| c24438.graph_c0 | 0.02838536    | 0.22731027    | 0.10942894    | 7.60977958     | 9.72383228     | 10.377755      | 1.01E-36  | 5.222599  | up        | PREDICTED: ornithine decarboxylase-like [Sesamum<br>indicum]                    |
| c24441.graph_c0 | 0.61013615    | 0.34899835    | 0.50403157    | 12.4464384     | 16.03526       | 20.1489292     | 8.14E-20  | 4.031307  | up        | PREDICTED: cysteine-rich repeat secretory protein 3-like<br>[Sesamum indicum]   |
| c24442.graph_c0 | 0.22735192    | 0.91031832    | 0.29215622    | 3.97957697     | 9.76308879     | 8.75932483     | 0.0003553 | 2.948819  | up        | -                                                                               |
| c24465.graph_c0 | 2528.85708    | 2899.14667    | 2538.28124    | 6.93694057     | 8.38580132     | 8.14157253     | 8.1E-292  | -9.427562 | down      | legumin-like protein [Perilla frutescens]                                       |
| c24469.graph_c0 | 19.9370719    | 21.8370465    | 21.7212422    | 19.8313936     | 20.5859578     | 22.6198542     | 0.0001186 | -1.029883 | down      | PREDICTED: uncharacterized protein LOC105159964<br>[Sesamum indicum]            |

| #ID             | 0 h-1<br>FPKM | 0 h-2<br>FPKM | 0 h-3<br>FPKM | 48 h-1<br>FPKM | 48 h-2<br>FPKM | 48 h-3<br>FPKM | FDR       | log2FC    | regulated | nr_annotation                                                                                                 |
|-----------------|---------------|---------------|---------------|----------------|----------------|----------------|-----------|-----------|-----------|---------------------------------------------------------------------------------------------------------------|
| c24473.graph_c0 | 31.584226     | 33.5155178    | 27.8708881    | 12.9252617     | 13.0312621     | 14.6677126     | 2.809E-35 | -2.211386 | down      | PREDICTED: uncharacterized protein LOC105159991 [Sesamum indicum]                                             |
| c24475.graph_c0 | 0.18915212    | 0.31556921    | 0.16204531    | 3.02049396     | 3.87673783     | 3.7730013      | 4.309E-07 | 2.981946  | up        | PREDICTED: uncharacterized protein LOC105167521 [Sesamum indicum]                                             |
| c24482.graph_c0 | 5.9714425     | 5.51365649    | 4.5975089     | 96.8889636     | 118.945273     | 136.532743     | 7.926E-40 | 3.43375   | up        | PREDICTED: probable methylenetetrahydrofolate reductase [Sesamum indicum]                                     |
| c24492.graph_c0 | 1.5829336     | 1.70640472    | 2.03413235    | 214.819055     | 202.143412     | 199.628933     | 5.47E-156 | 5.837174  | up        | hypothetical protein MIMGU_mgv1a017195mg [Erythranthe guttata]                                                |
| c24494.graph_c0 | 23.9298511    | 24.1255251    | 20.2801015    | 15.3292957     | 12.4726287     | 11.038488      | 5.416E-18 | -1.825572 | down      | -                                                                                                             |
| c24500.graph_c0 | 4.54786624    | 5.31115695    | 5.45457563    | 21.0886148     | 29.5905036     | 33.1796526     | 3.651E-05 | 1.427459  | up        | -                                                                                                             |
| c24502.graph_c0 | 23.3114681    | 20.8785151    | 23.0189436    | 0.45212726     | 0.71846102     | 0.40230012     | 4.344E-34 | -6.440043 | down      | -                                                                                                             |
| c24503.graph_c0 | 57.9925772    | 59.6072111    | 49.0745289    | 53.5950827     | 30.9330201     | 24.6690937     | 1.619E-11 | -1.612286 | down      | PREDICTED: uncharacterized protein LOC105178379 [Sesamum indicum]                                             |
| c24520.graph_c0 | 2.36183844    | 1.35097341    | 1.30073824    | 94.6507636     | 118.217706     | 127.366709     | 4.173E-67 | 5.067077  | up        | -                                                                                                             |
| c24534.graph_c0 | 39.4289409    | 38.2034094    | 44.0906863    | 250.895268     | 213.25118      | 205.42693      | 8.895E-13 | 1.444394  | up        | conserved hypothetical protein [Ricinus communis]                                                             |
| c24539.graph_c0 | 0.13595458    | 0.20413607    | 0.08735351    | 1.25250224     | 1.65859282     | 3.06478965     | 0.0026193 | 2.784063  | up        | PREDICTED: BTB/POZ domain-containing protein At1g30440-like [Camelina sativa]                                 |
| c24542.graph_c0 | 21.4777708    | 20.8615871    | 22.1032183    | 0.50305229     | 0.26646145     | 1.26823655     | 1.64E-72  | -6.005503 | down      | -                                                                                                             |
| c24548.graph_c0 | 0.58752631    | 0.3360655     | 0.43142547    | 15.4647875     | 9.01068694     | 7.91227308     | 1.573E-05 | 3.575606  | up        | PREDICTED: 5-norcocaine synthase-like [Sesamum indicum]                                                       |
| c24559.graph_c0 | 153.220404    | 156.896774    | 146.418925    | 10.595432      | 10.6725472     | 10.8187315     | 1.09E-203 | -4.847758 | down      | PREDICTED: uncharacterized protein LOC105168445 [Sesamum indicum]                                             |
| c24566.graph_c0 | 0.54732374    | 0.44825875    | 0.51151467    | 25.807425      | 24.1348122     | 29.7339957     | 2.313E-53 | 4.706491  | up        | PREDICTED: 2-C-methyl-D-erythritol 4-phosphate cytidyltransferase, chloroplastic isoform X2 [Sesamum indicum] |
| c24575.graph_c0 | 2.40477893    | 3.35886551    | 3.16210209    | 20.1450402     | 22.8149182     | 25.9017612     | 2.858E-14 | 1.925402  | up        | PREDICTED: magnesium protoporphyrin IX methyltransferase, chloroplastic [Sesamum indicum]                     |
| c24580.graph_c0 | 19.0399117    | 18.7405695    | 18.4524695    | 103.277266     | 120.452718     | 121.769906     | 8.234E-29 | 1.599079  | up        | PREDICTED: NAC transcription factor 23 [Sesamum indicum]                                                      |
| c24593.graph_c0 | 198.631914    | 203.43666     | 202.034914    | 150.711359     | 137.207085     | 111.123084     | 4.728E-30 | -1.612275 | down      | hypothetical protein MIMGU_mgv1a023553mg [Erythranthe guttata]                                                |
| c24594.graph_c0 | 0.85792605    | 0.99090592    | 0.63603977    | 11.977258      | 14.5240917     | 16.7974072     | 9.135E-28 | 3.104571  | up        | PREDICTED: uncharacterized protein LOC105165456 [Sesamum indicum]                                             |
| c24616.graph_c0 | 1.40760658    | 1.6103041     | 1.35662264    | 0.37050828     | 0.63782647     | 0.32967604     | 7.535E-08 | -2.731812 | down      | PREDICTED: uncharacterized protein LOC105170552 [Sesamum indicum]                                             |
| c24628.graph_c0 | 0.15081109    | 0             | 0             | 2.63980322     | 2.6493645      | 4.45051142     | 1.824E-07 | 5.012584  | up        | hypothetical protein MIMGU_mgv1a009447mg [Erythranthe guttata]                                                |
| c24644.graph_c0 | 0.2492843     | 0.16635595    | 0             | 2.0669126      | 1.94634958     | 2.04347378     | 5.125E-06 | 2.865957  | up        | hypothetical protein MIMGU_mgv1a016118mg [Erythranthe guttata]                                                |



| #ID             | 0 h-1<br>FPKM | 0 h-2<br>FPKM | 0 h-3<br>FPKM | 48 h-1<br>FPKM | 48 h-2<br>FPKM | 48 h-3<br>FPKM | FDR       | log2FC    | regulated | nr_annotation                                                                             |
|-----------------|---------------|---------------|---------------|----------------|----------------|----------------|-----------|-----------|-----------|-------------------------------------------------------------------------------------------|
| c24648.graph_c0 | 1.54106536    | 1.69686936    | 1.2872145     | 68.7149285     | 77.1568265     | 98.4716745     | 9.41E-40  | 4.735582  | up        | PREDICTED: protein YLS3-like [Sesamum indicum]                                            |
| c24651.graph_c0 | 12.8744382    | 8.25928335    | 8.22637932    | 0              | 0              | 0              | 3.13E-32  | -Inf      | down      | uncharacterized protein LOC100214515 precursor [Zea mays]                                 |
| c24658.graph_c0 | 0             | 0.10074915    | 0             | 7.32518301     | 4.32210506     | 2.47515334     | 0.000124  | 6.1407    | up        | PREDICTED: protein LURP-one-related 11-like [Sesamum indicum]                             |
| c24673.graph_c0 | 6.38730085    | 6.34769895    | 6.43643783    | 4.06404477     | 3.40841209     | 3.46548916     | 4.45E-10  | -1.823775 | down      | PREDICTED: UDP-glycosyltransferase 89A2-like [Sesamum indicum]                            |
| c24676.graph_c0 | 0.59102025    | 0.50287026    | 0.49366487    | 9.06569863     | 9.66169016     | 11.0946087     | 2.812E-23 | 3.213166  | up        | PREDICTED: LOW QUALITY PROTEIN: uncharacterized protein LOC105175967 [Sesamum indicum]    |
| c24677.graph_c0 | 19.7965123    | 19.5670735    | 17.1728622    | 22.8259738     | 14.4602052     | 10.6144879     | 3.871E-07 | -1.243088 | down      | PREDICTED: probable inactive receptor kinase At1g27190 [Sesamum indicum]                  |
| c24685.graph_c0 | 11.3973257    | 11.1434189    | 9.48017232    | 6.91857816     | 3.66469732     | 2.06410722     | 4.562E-24 | -2.337904 | down      | PREDICTED: LOW QUALITY PROTEIN: U-box domain-containing protein 28-like [Sesamum indicum] |
| c24693.graph_c1 | 4.53925679    | 5.76287104    | 7.96719469    | 1.12196228     | 1.72884799     | 1.17982717     | 2.51E-08  | -3.208725 | down      | PREDICTED: mitoferrin-like [Sesamum indicum]                                              |
| c24702.graph_c0 | 1.24265803    | 1.1978319     | 0.65057453    | 21.2851278     | 14.9578107     | 16.0720624     | 1.164E-12 | 3.076291  | up        | PREDICTED: mitogen-activated protein kinase kinase kinase 2 [Sesamum indicum]             |
| c24737.graph_c0 | 3.63095419    | 3.98074147    | 3.61053325    | 13.4599319     | 17.1700605     | 20.5869382     | 1.676E-06 | 1.167489  | up        | hypothetical protein MIMGU_mgv1a010118mg [Erythranthe guttata]                            |
| c24739.graph_c0 | 0.9279034     | 0.82562893    | 1.14822991    | 27.7666363     | 44.0056832     | 47.0749204     | 1.502E-20 | 4.327143  | up        | PREDICTED: homeobox-leucine zipper protein ATHB-6-like [Sesamum indicum]                  |
| c24749.graph_c0 | 0.24777779    | 0             | 0.15920213    | 35.0393006     | 42.0772698     | 33.513552      | 2.156E-40 | 7.067302  | up        | predicted protein [Hordeum vulgare subsp. vulgare]                                        |
| c24752.graph_c0 | 5.66846869    | 6.35504219    | 5.19606744    | 81.2220432     | 111.603895     | 134.535986     | 1.652E-16 | 3.225665  | up        | hypothetical protein MIMGU_mgv1a006173mg [Erythranthe guttata]                            |
| c24765.graph_c0 | 0             | 0             | 0             | 7.39668177     | 10.7143767     | 8.46195809     | 5.852E-20 | Inf       | up        | hypoteneucal protein CICLE_v10022284mg [Citrus clementina]                                |
| c24769.graph_c0 | 4.51302474    | 4.35903354    | 4.78197416    | 35.1580335     | 46.2093623     | 46.4707868     | 6.412E-22 | 2.20364   | up        | PREDICTED: inorganic phosphate transporter 1-4-like [Sesamum indicum]                     |
| c24783.graph_c0 | 0             | 0             | 0             | 3.83874592     | 4.06668583     | 4.21511055     | 9.474E-13 | Inf       | up        | -                                                                                         |
| c24790.graph_c0 | 89.7149166    | 82.5351042    | 77.5364442    | 71.533812      | 66.2421097     | 70.7226175     | 8.549E-20 | -1.27583  | down      | PREDICTED: cell number regulator $\delta$ -like [Sesamum indicum]                         |
| c24791.graph_c0 | 12.9341724    | 13.8588934    | 9.71504693    | 87.7741566     | 95.2973931     | 78.6982468     | 2.089E-24 | 1.82759   | up        | unnamed protein product [Coffea canephora]                                                |
| c24796.graph_c0 | 0.15451505    | 0.30933955    | 0.39711592    | 6.76159385     | 7.76629628     | 8.29633418     | 1.64E-11  | 3.700808  | up        | hypothetical protein L484_021121 [Morus notabilis]                                        |
| c24797.graph_c0 | 0.92113059    | 0.72447018    | 0.84549234    | 64.3121799     | 62.2232769     | 50.8063758     | 2.17E-54  | 5.138456  | up        | PREDICTED: probable pectinesterase/pectinesterase inhibitor 17 [Sesamum indicum]          |
| c24800.graph_c0 | 0             | 0             | 0             | 2.69112637     | 3.4062965      | 2.51894016     | 4.138E-16 | Inf       | up        | PREDICTED: uncharacterized protein LOC105163689 [Sesamum indicum]                         |
| c24813.graph_c0 | 4.26672518    | 4.14538009    | 3.22524164    | 14.1623891     | 17.7590483     | 17.1279007     | 0.0002918 | 1.0569    | up        | PREDICTED: polyadenylate-binding protein-interacting protein 6-like [Sesamum indicum]     |
| c24821.graph_c0 | 0.32283847    | 0.21544116    | 0.41486022    | 6.24581696     | 4.83123085     | 5.64570451     | 1.888E-07 | 3.11488   | up        | PREDICTED: protein KADIALIS-like 4 [Sesamum indicum]                                      |

| #ID             | 0 h-1<br>FPKM | 0 h-2<br>FPKM | 0 h-3<br>FPKM | 48 h-1<br>FPKM | 48 h-2<br>FPKM | 48 h-3<br>FPKM | FDR       | log2FC    | regulated | nr_annotation                                                                                                 |
|-----------------|---------------|---------------|---------------|----------------|----------------|----------------|-----------|-----------|-----------|---------------------------------------------------------------------------------------------------------------|
| c24843.graph_c0 | 630.067796    | 663.918723    | 606.604714    | 155.016444     | 71.4585767     | 64.9933542     | 4.41E-104 | -3.704736 | down      | PREDICTED: zinc finger CCCH domain-containing protein 29 [Sesamum indicum]                                    |
| c24859.graph_c0 | 4.36843102    | 2.55553559    | 4.15552712    | 40.662964      | 39.0908749     | 45.761895      | 4.99E-34  | 2.482707  | up        | PREDICTED: O-acetyl-ADP-ribose deacetylase MACROD2 isoform X1 [Sesamum indicum]                               |
| c24860.graph_c0 | 13.7655464    | 8.03794282    | 6.63347706    | 0              | 0              | 0              | 3.444E-15 | -Inf      | down      | 40S ribosomal protein S26E [Uncinocarpus reesii 1704]                                                         |
| c24866.graph_c0 | 1.34178033    | 0.92985502    | 0.53053564    | 9.9841718      | 8.86454958     | 7.91086228     | 2.218E-08 | 2.249091  | up        | PREDICTED: acidic mammalian chitinase-like [Sesamum indicum]                                                  |
| c24873.graph_c0 | 3.37351285    | 3.14400189    | 3.88663921    | 18.0579711     | 14.0780333     | 16.4969865     | 1.198E-05 | 1.20909   | up        | PREDICTED: plastid division protein PDV2-like [Sesamum indicum]                                               |
| c24876.graph_c0 | 2.36562097    | 2.03564034    | 3.25324409    | 0.87939263     | 0.04050478     | 0              | 2.218E-12 | -4.025357 | down      | retrotransposon protein, putative, unclassified [Oryza sativa Japonica Group]                                 |
| c24909.graph_c0 | 5.19017097    | 5.70534292    | 5.68755184    | 23.144923      | 28.5902412     | 31.0870825     | 4.987E-14 | 1.297736  | up        | PREDICTED: DEAD-box ATP-dependent RNA helicase 31-like [Sesamum indicum]                                      |
| c24920.graph_c0 | 873.207101    | 776.991163    | 836.622975    | 29.5383047     | 20.6869282     | 25.1832986     | 8.7E-269  | -6.055379 | down      | -                                                                                                             |
| c24925.graph_c0 | 6.92784282    | 7.23305011    | 6.22221398    | 1.50981048     | 2.32648892     | 2.99216337     | 5.669E-12 | -2.603106 | down      | PREDICTED: protein MKS1 [Sesamum indicum]                                                                     |
| c24930.graph_c0 | 1.87441894    | 1.96782251    | 1.76246528    | 8.42359505     | 8.87915865     | 9.93122509     | 0.0001519 | 1.262258  | up        | PREDICTED: potassium transporter $\delta$ -like [Sesamum indicum]                                             |
| c24937.graph_c0 | 0             | 0             | 0             | 5.00392955     | 4.44353274     | 5.7947541      | 2.131E-22 | Inf       | up        | PREDICTED: putative cyclin-A3-1 [Sesamum indicum]                                                             |
| c24966.graph_c0 | 14.1134348    | 12.9624071    | 11.779261     | 6.56813008     | 6.24812337     | 7.39480661     | 5.162E-08 | -1.959146 | down      | hypothetical protein MIMGU_mgv1a019945mg [Erythranthe guttata]                                                |
| c24971.graph_c0 | 5.89281907    | 7.23657382    | 7.3383046     | 3.30208359     | 2.43092277     | 2.34057938     | 4.342E-12 | -2.354505 | down      | PREDICTED: zinc transporter 8-like [Sesamum indicum]                                                          |
| c24979.graph_c0 | 27.8598697    | 28.1644315    | 29.6210949    | 136.988939     | 128.129193     | 134.851448     | 1.532E-17 | 1.206294  | up        | PREDICTED: adrenodoxin-like protein, mitochondrial [Sesamum indicum]                                          |
| c24986.graph_c0 | 0.12156351    | 0             | 0             | 20.3825861     | 21.948805      | 10.1643014     | 2.27E-11  | 7.761724  | up        | -                                                                                                             |
| c24998.graph_c0 | 20.2942048    | 20.4249314    | 17.4331488    | 5.28374972     | 3.33696647     | 3.43567407     | 1.235E-28 | -3.276631 | down      | PREDICTED: uncharacterized protein LOC105177785 [Sesamum indicum]                                             |
| c24998.graph_c1 | 14.3980554    | 14.0898056    | 16.2928687    | 3.46458933     | 2.51678557     | 2.7304541      | 1.184E-23 | -3.374961 | down      | PREDICTED: uncharacterized protein LOC105177785 [Sesamum indicum]                                             |
| c24999.graph_c0 | 22.369013     | 21.9608081    | 22.9407748    | 2.67505015     | 2.51901446     | 1.67498619     | 8.241E-47 | -4.305379 | down      | hypothetical protein MIMGU_mgv1a011964mg [Erythranthe guttata]                                                |
| c25013.graph_c0 | 12.5422114    | 15.5491554    | 10.7448254    | 6.77344669     | 5.48725828     | 5.49518047     | 1.082E-14 | -2.139896 | down      | PREDICTED: probable LRR receptor-like serine/threonine-protein kinase RLK [Sesamum indicum]                   |
| c25017.graph_c1 | 5.1605565     | 5.32226111    | 6.93295212    | 7.20339583     | 4.42605217     | 4.23029527     | 0.0020989 | -1.145221 | down      | PREDICTED: ethylene-responsive transcription factor ERF014 [Sesamum indicum]                                  |
| c25019.graph_c0 | 1.00467236    | 1.08017308    | 1.91265742    | 17.825787      | 19.2111028     | 25.2255326     | 1.396E-20 | 2.933017  | up        | PREDICTED: 4-diphosphocytidyl-2-C-methyl-D-erythritol kinase, chloroplastic [Sesamum indicum]                 |
| c25041.graph_c0 | 3.58343813    | 4.52481108    | 3.03980946    | 2.91290906     | 2.94872399     | 3.18706347     | 2.863E-07 | -1.316683 | down      | PREDICTED: TATA box-binding protein-associated factor RNA polymerase I subunit B isoform X1 [Sesamum indicum] |

| #ID             | 0 h-1<br>FPKM | 0 h-2<br>FPKM | 0 h-3<br>FPKM | 48 h-1<br>FPKM | 48 h-2<br>FPKM | 48 h-3<br>FPKM | FDR       | log2FC    | regulated | nr_annotation                                                                                    |
|-----------------|---------------|---------------|---------------|----------------|----------------|----------------|-----------|-----------|-----------|--------------------------------------------------------------------------------------------------|
| c25044.graph_c0 | 28.3636885    | 27.3958768    | 27.3541094    | 20.0690235     | 20.5592019     | 17.9479426     | 2.652E-25 | -1.521372 | down      | PREDICTED: zinc finger Ran-binding domain-containing protein 2-like isoform X1 [Sesamum indicum] |
| c25045.graph_c0 | 1.86562029    | 1.7806285     | 2.28588914    | 0.11991147     | 0.3387511      | 0.10669651     | 4.256E-16 | -4.42425  | down      | -                                                                                                |
| c25047.graph_c0 | 148.446321    | 148.429078    | 136.401223    | 23.0920603     | 26.848909      | 30.7358589     | 1.47E-117 | -3.445402 | down      | hypothetical protein MIMGU_mgv1a010693mg [Erythranthe guttata]                                   |
| c25052.graph_c0 | 0.73141491    | 1.46429462    | 1.35762916    | 0.26204388     | 0.07931535     | 0.19985577     | 6.936E-08 | -3.721293 | down      | -                                                                                                |
| c25062.graph_c0 | 1.14013102    | 1.14127269    | 0.45784797    | 9.97844906     | 10.6405026     | 12.0330617     | 3.159E-09 | 2.563927  | up        | hypothetical protein MIMGU_mgv1a015838mg [Erythranthe guttata]                                   |
| c25075.graph_c0 | 4.25003957    | 4.2004435     | 2.41963821    | 0.59474638     | 1.89018501     | 1.85220613     | 3.887E-07 | -2.354773 | down      | -                                                                                                |
| c25081.graph_c0 | 0.32712571    | 0.53211157    | 0.63055423    | 3.08903779     | 2.87338037     | 2.54748965     | 0.001725  | 1.493916  | up        | PREDICTED: putative RING-H2 finger protein ATL21A [Sesamum indicum]                              |
| c25082.graph_c0 | 2.10830795    | 1.48688618    | 1.72407403    | 22.8221519     | 28.7134696     | 26.3166326     | 8.772E-31 | 2.851341  | up        | PREDICTED: delta(7)-sterol-C5(6)-desaturase-like [Solanum tuberosum]                             |
| c25091.graph_c0 | 62.6735645    | 34.4773403    | 37.7854548    | 0              | 0              | 0              | 6.918E-31 | -Inf      | down      | -                                                                                                |
| c25102.graph_c0 | 0             | 0.07307332    | 0             | 19.906759      | 19.3788948     | 24.5946211     | 3.612E-42 | 8.76467   | up        | PREDICTED: ubiquitin-conjugating enzyme E2 20-like [Sesamum indicum]                             |
| c25105.graph_c0 | 0             | 0             | 0             | 6.02430569     | 14.5589863     | 19.933954      | 4.551E-08 | Inf       | up        | PREDICTED: protein IWS1 homolog [Sesamum indicum]                                                |
| c25108.graph_c0 | 28.4828901    | 28.7615115    | 25.0432284    | 10.4500829     | 12.7287465     | 16.6716181     | 2.063E-34 | -2.067726 | down      | PREDICTED: LOW QUALITY PROTEIN: probable carboxylesterase 13 [Sesamum indicum]                   |
| c25122.graph_c0 | 7.11268892    | 10.0122345    | 8.56883143    | 368.89501      | 516.402047     | 550.711684     | 1.237E-42 | 4.779994  | up        | PREDICTED: pEARLI1-like lipid transfer protein 1 [Sesamum indicum]                               |
| c25137.graph_c0 | 6.01441083    | 9.73893631    | 7.04680698    | 4.4001007      | 4.1434428      | 3.91518314     | 2.683E-05 | -1.887258 | down      | PREDICTED: PHD finger protein ALFIN-LIKE 4-like [Sesamum indicum]                                |
| c25141.graph_c0 | 29.3142446    | 27.9363566    | 29.4401147    | 3.35778613     | 1.2196002      | 1.15241319     | 4.26E-126 | -4.915138 | down      | hypothetical protein MIMGU_mgv1a024254mg, partial [Erythranthe guttata]                          |
| c25142.graph_c0 | 2.17601813    | 1.98600322    | 2.38505336    | 39.9758737     | 44.6607043     | 33.2618955     | 1.472E-30 | 3.15169   | up        | uncharacterized protein LOC100499662 [Glycine max]                                               |
| c25145.graph_c0 | 14.5828492    | 14.7371403    | 12.9562839    | 92.1142814     | 98.7756203     | 104.583991     | 2.192E-35 | 1.787231  | up        | PREDICTED: protein STRICTOSIDINE SYNTHASE-LIKE 11 [Sesamum indicum]                              |
| c25153.graph_c0 | 0.3743785     | 0.67455608    | 0.38487295    | 3.31105815     | 2.92305385     | 1.90272809     | 0.0074292 | 1.495088  | up        | hypothetical protein PRUPE_ppa015674mg [Prunus persica]                                          |
| c25166.graph_c0 | 0             | 0             | 0             | 16.0258569     | 51.0272026     | 56.2422126     | 2.592E-10 | Inf       | up        | hypothetical protein MIMGU_mgv1a015417mg [Erythranthe guttata]                                   |
| c25175.graph_c0 | 27.3722234    | 29.8866101    | 26.4220775    | 28.8477053     | 25.2093973     | 24.158602      | 2.404E-15 | -1.111114 | down      | PREDICTED: WD repeat-containing protein 70 [Nicotiana glauca]                                    |
| c25182.graph_c0 | 63.8314566    | 57.7060787    | 53.7491973    | 40.0414889     | 30.7050405     | 24.5972031     | 5.797E-22 | -1.887266 | down      | -                                                                                                |
| c25187.graph_c0 | 2.79521788    | 3.37691691    | 3.03459166    | 3.32991857     | 2.96322176     | 1.97529435     | 0.0020709 | -1.167251 | down      | hypothetical protein MIMGU_mgv1a002261mg [Erythranthe guttata]                                   |

| #ID             | 0 h-1<br>FPKM | 0 h-2<br>FPKM | 0 h-3<br>FPKM | 48 h-1<br>FPKM | 48 h-2<br>FPKM | 48 h-3<br>FPKM | FDR       | log2FC    | regulated | nr_annotation                                                                                                     |
|-----------------|---------------|---------------|---------------|----------------|----------------|----------------|-----------|-----------|-----------|-------------------------------------------------------------------------------------------------------------------|
| c25187.graph_c1 | 3.43660287    | 4.49851922    | 2.24205592    | 3.55568705     | 2.734814       | 1.56024442     | 0.0032095 | -1.377238 | down      | hypothetical protein MIMGU_mgv1a002261mg<br>[Erythranthe guttata]                                                 |
| c25189.graph_c0 | 16.8727294    | 17.1730079    | 14.6972796    | 10.901846      | 14.9752576     | 17.1265382     | 7.335E-10 | -1.203308 | down      | hypothetical protein MIMGU_mgv1a017391mg<br>[Erythranthe guttata]                                                 |
| c25203.graph_c0 | 2.31816883    | 2.17078108    | 0.67266358    | 129.792305     | 173.552611     | 176.236298     | 1.537E-75 | 5.525102  | up        | hypothetical protein MIMGU_mgv1a012619mg<br>[Erythranthe guttata]                                                 |
| c25206.graph_c0 | 1.41362179    | 1.50347715    | 1.19211748    | 0.52906774     | 0.17245634     | 0.18106204     | 5.812E-10 | -3.211337 | down      | -                                                                                                                 |
| c25208.graph_c0 | 0             | 0             | 0             | 4.38002895     | 7.15350224     | 5.52120818     | 5.255E-14 | Inf       | up        | unnamed protein product [Coffea canephora]                                                                        |
| c25210.graph_c0 | 1.86423018    | 1.73280429    | 4.19231679    | 19.4439925     | 19.1040201     | 22.1039898     | 5.967E-12 | 1.932776  | up        | PREDICTED: 60S acidic ribosomal protein P1-like<br>[Tarenaya hassleriana]                                         |
| c25211.graph_c0 | 9.3878586     | 7.5745149     | 9.87981162    | 39.4783682     | 41.3091418     | 41.6290428     | 6.095E-13 | 1.169492  | up        | PREDICTED: 2-methyl-6-phytyl-1,4-hydroquinone<br>methyltransferase, chloroplastic isoform X1 [Sesamum<br>indicum] |
| c25217.graph_c0 | 1.51844679    | 1.29478695    | 1.27675315    | 7.01173139     | 8.34286727     | 12.262855      | 2.376E-05 | 1.733177  | up        | PREDICTED: importin subunit beta-1-like [Sesamum<br>indicum]                                                      |
| c25218.graph_c0 | 14.7094792    | 16.2761174    | 11.7592486    | 12.7500961     | 10.9607451     | 7.43931729     | 1.102E-09 | -1.465268 | down      | PREDICTED: limonoid UDP-glucosyltransferase-like<br>[Sesamum indicum]                                             |
| c25220.graph_c0 | 3.4938305     | 3.49732904    | 2.87927088    | 12.2802102     | 13.5653506     | 15.0361026     | 3.142E-05 | 1.032233  | up        | PREDICTED: probable RNA 3'-terminal phosphate<br>cyclase-like protein [Sesamum indicum]                           |
| c25222.graph_c0 | 0             | 0             | 0             | 14.6618853     | 16.5566098     | 21.4328085     | 2.338E-45 | Inf       | up        | PREDICTED: fructose-1,6-bisphosphatase, chloroplastic<br>[Sesamum indicum]                                        |
| c25224.graph_c0 | 0.30007715    | 0.15018882    | 0.38561102    | 91.781613      | 86.6883163     | 89.7842033     | 4.16E-185 | 7.304082  | up        | PREDICTED: alpha carbonic anhydrase 1, chloroplastic<br>[Sesamum indicum]                                         |
| c25226.graph_c0 | 1.53320517    | 1.98947836    | 1.82428643    | 14.8049732     | 18.6767947     | 23.041771      | 4.331E-13 | 2.378056  | up        | PREDICTED: uncharacterized protein LOC105161424<br>[Sesamum indicum]                                              |
| c25229.graph_c0 | 5.18272245    | 3.2709317     | 3.78604852    | 0              | 0              | 0              | 8.227E-46 | -Inf      | down      | --                                                                                                                |
| c25231.graph_c0 | 0             | 0             | 0             | 12.7488536     | 10.0191873     | 7.20351512     | 1.218E-18 | Inf       | up        | PREDICTED: ectonucleotide<br>pyrophosphatase/phosphodiesterase family member 3<br>[Eucalyptus grandis]            |
| c25236.graph_c0 | 2.34768629    | 2.64379179    | 2.01124656    | 7.38970928     | 12.2837454     | 10.6113886     | 0.000239  | 1.089119  | up        | PREDICTED: uncharacterized protein LOC105167293<br>[Sesamum indicum]                                              |
| c25237.graph_c0 | 0             | 0             | 0             | 2.44300934     | 2.77978121     | 2.09326483     | 1.728E-11 | Inf       | up        | PREDICTED: uncharacterized protein LOC105159159<br>[Sesamum indicum]                                              |
| c25241.graph_c0 | 0             | 0             | 0             | 1.08290503     | 1.78454356     | 1.98065601     | 5.352E-13 | Inf       | up        | PREDICTED: organic cation/carnitine transporter 7-like<br>isoform X2 [Sesamum indicum]                            |
| c25243.graph_c0 | 3.0344506     | 2.87180792    | 2.22147019    | 0              | 0.03589732     | 0.01507545     | 2.274E-58 | -8.363178 | down      | hypothetical protein MIMGU_mgv1a019304mg, partial<br>[Erythranthe guttata]                                        |
| c25252.graph_c0 | 103.496319    | 104.193991    | 106.68728     | 20.0098662     | 19.1129751     | 21.1369513     | 2.91E-114 | -3.400867 | down      | hypothetical protein MIMGU_mgv1a004537mg<br>[Erythranthe guttata]                                                 |

| #ID             | 0 h-1<br>FPKM | 0 h-2<br>FPKM | 0 h-3<br>FPKM | 48 h-1<br>FPKM | 48 h-2<br>FPKM | 48 h-3<br>FPKM | FDR       | log2FC    | regulated | nr_annotation                                                                                               |
|-----------------|---------------|---------------|---------------|----------------|----------------|----------------|-----------|-----------|-----------|-------------------------------------------------------------------------------------------------------------|
| c25257.graph_c0 | 22.0544113    | 11.7446956    | 14.5104853    | 0              | 0              | 0              | 7.086E-29 | -Inf      | down      | secreted protein [Achlya hypogyna]                                                                          |
| c25258.graph_c0 | 0             | 0.15909452    | 0.13615882    | 3.61173342     | 7.18703936     | 9.55423932     | 1.968E-07 | 5.067917  | up        | PREDICTED: uncharacterized protein At4g06744-like [Nicotiana tomentosiformis]                               |
| c25262.graph_c0 | 4.35303401    | 2.31486498    | 2.85517949    | 0              | 0              | 0              | 9.453E-20 | -Inf      | down      | --                                                                                                          |
| c25282.graph_c0 | 0.8141608     | 0.67914672    | 0.87185739    | 5.62543526     | 8.21082056     | 13.6260247     | 0.000585  | 2.508454  | up        | unnamed protein product [Coffea canephora]                                                                  |
| c25287.graph_c0 | 0             | 0             | 0             | 3.88581469     | 12.6891577     | 23.4544748     | 7.558E-06 | Inf       | up        | PREDICTED: GDSL esterase/lipase At3g48460 [Sesamum indicum]                                                 |
| c25288.graph_c0 | 12.0281435    | 10.3785908    | 10.2387938    | 6.82276434     | 8.00052819     | 7.95491303     | 1.083E-18 | -1.538402 | down      | PREDICTED: uncharacterized aarF domain-containing protein kinase At5g05200, chloroplastic [Sesamum indicum] |
| c25291.graph_c0 | 0.09626664    | 0.03212101    | 0.08247096    | 29.4441187     | 41.8718243     | 44.2966389     | 2.149E-57 | 8.073235  | up        | PREDICTED: purple acid phosphatase 22-like [Sesamum indicum]                                                |
| c25305.graph_c1 | 0             | 0             | 0             | 1.65501548     | 2.95290648     | 2.71272625     | 1.485E-11 | Inf       | up        | hypothetical protein MIMGU_mgv1a002668mg [Erythranthe guttata]                                              |
| c25311.graph_c0 | 23.2037019    | 12.4851816    | 14.5117501    | 0              | 0              | 0              | 1.016E-26 | -Inf      | down      | putative Trypsin [Glarea lozoyensis 74030]                                                                  |
| c25312.graph_c0 | 0.40427861    | 0.32374675    | 0.41561122    | 23.5759473     | 23.9105365     | 18.9561849     | 2.348E-49 | 4.843293  | up        | PREDICTED: uncharacterized protein LOC105158282 [Sesamum indicum]                                           |
| c25316.graph_c0 | 5.95631368    | 4.25877002    | 4.81114788    | 1.56781276     | 2.15917977     | 2.79006073     | 7.974E-06 | -2.228977 | down      | -                                                                                                           |
| c25324.graph_c0 | 0.85452749    | 0.85538317    | 1.2478428     | 4.75926272     | 5.11767923     | 6.78198942     | 9.759E-05 | 1.468374  | up        | PREDICTED: protein BASIC PENTACYSSTEINE4 isoform X2 [Sesamum indicum]                                       |
| c25327.graph_c0 | 2.36744097    | 3.29914949    | 2.74399505    | 19.0734177     | 22.0861255     | 21.7279742     | 1.753E-25 | 1.882245  | up        | PREDICTED: LOW QUALITY PROTEIN: microtubule-associated protein TORTIFOLIA1 [Sesamum indicum]                |
| c25329.graph_c0 | 0.94418337    | 1.03514109    | 0.80887534    | 15.118705      | 14.1295671     | 17.691002      | 1.602E-22 | 3.057409  | up        | PREDICTED: probable plastid-lipid-associated protein 13, chloroplastic [Sesamum indicum]                    |
| c25330.graph_c0 | 2.95918604    | 2.21347414    | 2.50725575    | 15.068969      | 14.1229955     | 15.0876449     | 5.59E-11  | 1.511602  | up        | PREDICTED: probable aspartyl aminopeptidase [Sesamum indicum]                                               |
| c25337.graph_c0 | 4.66134813    | 3.70602209    | 3.98379115    | 27.5330758     | 30.6916544     | 30.276086      | 2.523E-29 | 1.822559  | up        | PREDICTED: peroxisomal fatty acid beta-oxidation multifunctional protein AIM1 [Sesamum indicum]             |
| c25340.graph_c0 | 1.87493837    | 2.27899065    | 1.37678288    | 13.6951444     | 12.7438165     | 13.5032471     | 3.286E-07 | 1.839717  | up        | PREDICTED: thylakoid lumenal 15 kDa protein 1, chloroplastic [Sesamum indicum]                              |
| c25345.graph_c0 | 1.99657925    | 2.15231533    | 1.9736026     | 10.1671171     | 11.5631152     | 11.0610007     | 1.127E-10 | 1.402     | up        | hypothetical protein MIMGU_mgv1a003320mg [Erythranthe guttata]                                              |
| c25352.graph_c0 | 0.67709229    | 0.79737682    | 0.61418146    | 12.0720083     | 18.7362175     | 20.4057758     | 1.001E-15 | 3.591783  | up        | PREDICTED: transcription factor bHLH62 isoform X2 [Sesamum indicum]                                         |
| c25353.graph_c0 | 3544.28683    | 3972.98757    | 3769.0428     | 67.6043251     | 69.5688948     | 61.6392039     | 9.92E-163 | -6.844294 | down      | hypothetical protein MIMGU_mgv1a005193mg [Erythranthe guttata]                                              |
| c25360.graph_c0 | 0.20923553    | 0.38398259    | 0.26887594    | 3.14843651     | 3.57362863     | 5.86019668     | 2.983E-06 | 2.843869  | up        | PREDICTED: subtilisin-like protease [Sesamum indicum]                                                       |
| c25364.graph_c0 | 4.27758307    | 4.0677731     | 3.02327498    | 16.7483512     | 17.9515867     | 22.0908866     | 0.0044417 | 1.30366   | up        | -                                                                                                           |

| #ID             | 0 h-1<br>FPKM | 0 h-2<br>FPKM | 0 h-3<br>FPKM | 48 h-1<br>FPKM | 48 h-2<br>FPKM | 48 h-3<br>FPKM | FDR       | log2FC    | regulated | nr_annotation                                                                                     |
|-----------------|---------------|---------------|---------------|----------------|----------------|----------------|-----------|-----------|-----------|---------------------------------------------------------------------------------------------------|
| c25364.graph_c1 | 1.68504415    | 1.40560956    | 0.36089141    | 7.50313414     | 11.5118536     | 9.43882722     | 0.0005657 | 2.031061  | up        | leucine-rich repeat protein [Dasypyrum villosum]                                                  |
| c25365.graph_c0 | 11.9350735    | 14.7216069    | 10.518026     | 5.61785203     | 6.26969147     | 4.89180623     | 1.185E-17 | -2.163273 | down      | PREDICTED: uncharacterized protein LOC105168447 isoform X2 [Sesamum indicum]                      |
| c25367.graph_c0 | 0.49928036    | 0.58307703    | 0.85546004    | 5.59629721     | 6.33466669     | 6.82130357     | 7.247E-06 | 2.248733  | up        | hypothetical protein MIMGU_mgv1a014003mg [Erythranthe guttata]                                    |
| c25379.graph_c0 | 3.26135044    | 4.64579996    | 4.02977349    | 23.4587483     | 28.4631531     | 29.6649814     | 4.932E-13 | 1.750813  | up        | PREDICTED: CBL-interacting protein kinase 23-like [Malus domestica]                               |
| c25389.graph_c0 | 105.964818    | 101.507201    | 100.604851    | 12.3380705     | 10.9501788     | 13.5185422     | 6.01E-157 | -4.081688 | down      | PREDICTED: vacuolar cation/proton exchanger 3-like [Sesamum indicum]                              |
| c25391.graph_c0 | 6.69734689    | 3.86335273    | 4.23024274    | 0              | 0              | 0              | 2.409E-19 | -Inf      | down      | PREDICTED: OUS PROSOMA protein L9-like [Pinoenix doctylifera]                                     |
| c25397.graph_c0 | 26.4134521    | 24.0362738    | 18.5139991    | 15.9275748     | 15.467223      | 10.0386844     | 2.385E-12 | -1.745403 | down      | PREDICTED: U3 small nucleolar ribonucleoprotein protein MPP10 [Sesamum indicum]                   |
| c25411.graph_c0 | 114.718066    | 124.119637    | 134.439611    | 64.6540789     | 23.3544959     | 12.5721498     | 1.27E-28  | -2.884587 | down      | PREDICTED: basic 7S globulin [Sesamum indicum]                                                    |
| c25413.graph_c0 | 21.1148988    | 19.5792799    | 22.2140963    | 17.6339236     | 15.4702063     | 14.9550642     | 3.987E-14 | -1.403841 | down      | PREDICTED: protein LTV1 homolog isoform X2 [Sesamum indicum]                                      |
| c25414.graph_c0 | 8.31181414    | 8.19407448    | 6.79700652    | 2.32041979     | 2.94984409     | 2.68410425     | 1.535E-09 | -2.569863 | down      | PREDICTED: protein SOMBRERU-like [Sesamum indicum]                                                |
| c25418.graph_c0 | 0.37335694    | 0.2802981     | 0.9595569     | 4.47148997     | 8.65413722     | 9.33465376     | 7.17E-06  | 2.757827  | up        | -                                                                                                 |
| c25429.graph_c0 | 2.31751076    | 2.3198314     | 3.37517216    | 19.2153787     | 16.8882425     | 18.6175265     | 2.828E-05 | 1.751777  | up        | PREDICTED: alpha-soluble NSF attachment protein-like [Sesamum indicum]                            |
| c25434.graph_c0 | 0             | 0             | 0             | 9.53626104     | 12.4211216     | 17.360105      | 2.803E-24 | Inf       | up        | hypothetical protein MIMGU_mgv1a005366mg [Erythranthe guttata]                                    |
| c25448.graph_c0 | 3.72238792    | 2.78248872    | 3.35460332    | 34.0703832     | 39.0186597     | 41.9663318     | 5.365E-54 | 2.524269  | up        | PREDICTED: putative invertase inhibitor [Sesamum indicum]                                         |
| c25449.graph_c0 | 0.02876356    | 0.37430067    | 0.18481155    | 5.40576845     | 5.83904553     | 7.21503039     | 6.416E-20 | 3.950358  | up        | PREDICTED: F-box/LRR-repeat protein 17-like [Sesamum indicum]                                     |
| c25457.graph_c0 | 3.1410753     | 3.98267945    | 3.5366606     | 57.4894338     | 66.2751683     | 70.5755032     | 4.016E-86 | 3.167387  | up        | PREDICTED: biotin carboxylase 2, chloroplastic [Sesamum indicum]                                  |
| c25460.graph_c0 | 0.2311598     | 0.23139128    | 0.198033      | 3.9752438      | 3.083265       | 4.80041518     | 2.026E-07 | 3.15133   | up        | -                                                                                                 |
| c25462.graph_c0 | 13.5460463    | 13.3702305    | 11.8155056    | 3.72990683     | 3.36052285     | 2.76053768     | 1.438E-45 | -2.987585 | down      | PREDICTED: uncharacterized protein LOC105160924 [Sesamum indicum]                                 |
| c25464.graph_c0 | 0.13398266    | 0.10058762    | 0.30130279    | 67.394726      | 60.0201684     | 56.0684412     | 1.08E-100 | 7.394041  | up        | PREDICTED: alanine--glyoxylate aminotransferase 2 homolog 3, mitochondrial-like [Sesamum indicum] |
| c25466.graph_c0 | 0.07882468    | 0.23671083    | 0             | 4.57496147     | 6.6929472      | 8.07693096     | 5.983E-13 | 4.926617  | up        | PREDICTED: uncharacterized protein LOC105177131 [Sesamum indicum]                                 |
| c25476.graph_c0 | 30.0340494    | 26.6689042    | 32.5491046    | 106.242145     | 127.340298     | 151.083384     | 5.309E-08 | 1.084235  | up        | PREDICTED: 29 kDa ribonucleoprotein A, chloroplastic [Sesamum indicum]                            |
| c25483.graph_c0 | 1.05602619    | 1.31334634    | 0.74020116    | 0.02948122     | 0              | 0.02623221     | 1.973E-19 | -6.795955 | down      | hypothetical protein VITISV_009673 [Vitis vinifera]                                               |

| #ID             | 0 h-1<br>FPKM | 0 h-2<br>FPKM | 0 h-3<br>FPKM | 48 h-1<br>FPKM | 48 h-2<br>FPKM | 48 h-3<br>FPKM | FDR       | log2FC    | regulated | nr_annotation                                                                                                          |
|-----------------|---------------|---------------|---------------|----------------|----------------|----------------|-----------|-----------|-----------|------------------------------------------------------------------------------------------------------------------------|
| c25484.graph_c0 | 23.2951542    | 26.6633448    | 22.5740818    | 9.85095793     | 14.6288891     | 11.4262248     | 6.641E-20 | -2.036628 | down      | hypothetical protein MIMGU_mgv1a012871mg<br>[Erythranthe guttata]                                                      |
| c25486.graph_c0 | 0             | 0             | 0             | 1.08768797     | 2.56473782     | 3.65273325     | 2.134E-06 | Inf       | up        | PREDICTED: 1-aminocyclopropane-1-carboxylate synthase<br>7 [Sesamum indicum]                                           |
| c25495.graph_c0 | 29.027103     | 33.7022065    | 30.579227     | 29.6601667     | 24.9860851     | 23.9455496     | 1.611E-17 | -1.261241 | down      | PREDICTED: uncharacterized protein LOC105164353<br>[Sesamum indicum]                                                   |
| c25502.graph_c0 | 7.84809105    | 6.90371339    | 8.12920804    | 3.81227323     | 5.01348566     | 3.23617744     | 2.312E-12 | -1.944355 | down      | PREDICTED: cnaperone protein unaj 10 [Sesamum<br>indicum]                                                              |
| c25506.graph_c0 | 13.3334905    | 15.1599978    | 12.672741     | 2.13226163     | 2.45529635     | 1.52606787     | 2.921E-51 | -3.767268 | down      | PREDICTED: serine acetyltransferase 1, chloroplastic-like<br>[Sesamum indicum]                                         |
| c25512.graph_c0 | 1.26174657    | 0.84200668    | 0.54046477    | 18.2109841     | 13.9561532     | 14.8249582     | 8.987E-07 | 3.146039  | up        | -                                                                                                                      |
| c25523.graph_c0 | 3.1296977     | 4.20084239    | 4.47880652    | 2.2935195      | 2.01318481     | 2.91537122     | 5.577E-05 | -1.730194 | down      | PREDICTED: uncharacterized protein LOC105168847<br>isoform X1 [Sesamum indicum]                                        |
| c25527.graph_c0 | 0             | 0             | 0             | 10.6332468     | 13.0643112     | 13.0444141     | 8.027E-29 | Inf       | up        | Early nodulin 20 precursor, putative [Ricinus communis]                                                                |
| c25529.graph_c0 | 4.67367251    | 4.8516248     | 5.00487851    | 0              | 0              | 0              | 2.002E-29 | -Inf      | down      | -                                                                                                                      |
| c25539.graph_c0 | 1.18988269    | 1.48884272    | 0.99388013    | 10.3590668     | 15.9096507     | 20.3856506     | 2.671E-07 | 2.643235  | up        | PREDICTED: E3 ubiquitin-protein ligase ATL6-like<br>[Sesamum indicum]                                                  |
| c25559.graph_c0 | 27.4320229    | 25.4712313    | 23.5928034    | 11.9189681     | 10.9501269     | 9.94533734     | 7.091E-37 | -2.234691 | down      | PREDICTED: dipeptidyl peptidase 9 [Sesamum indicum]                                                                    |
| c25564.graph_c0 | 0             | 0             | 0             | 219.328856     | 248.154066     | 310.619451     | 1.59E-115 | Inf       | up        | PREDICTED: low-temperature-induced cysteine proteinase<br>[Sesamum indicum]                                            |
| c25565.graph_c0 | 0.08525011    | 0.38400965    | 0.21909954    | 10.2884733     | 13.2290305     | 19.4972477     | 3.153E-13 | 4.939399  | up        | PREDICTED: glucan endo-1,3-beta-glucosidase 12<br>[Sesamum indicum]                                                    |
| c25568.graph_c0 | 4.28856398    | 4.68760393    | 6.01773079    | 35.9214454     | 32.3775243     | 32.8920689     | 2.323E-19 | 1.735671  | up        | PREDICTED: uncharacterized membrane protein<br>At4g09580 [Sesamum indicum]                                             |
| c25571.graph_c0 | 50.8473951    | 48.2284602    | 45.1278551    | 14.9635979     | 16.6864395     | 15.220598      | 9.42E-72  | -2.639088 | down      | PREDICTED: leucine-rich repeat extensin-like protein 5<br>[Nicotiana tomentosiformis]                                  |
| c25584.graph_c0 | 5.09613289    | 5.14637958    | 4.34650389    | 3.15762515     | 3.38913571     | 3.32720037     | 6.869E-07 | -1.580088 | down      | PREDICTED: uncharacterized protein At5g19025-like<br>[Sesamum indicum]                                                 |
| c25595.graph_c0 | 0             | 0             | 0             | 3.67183619     | 3.63395303     | 3.8690263      | 1.289E-15 | Inf       | up        | -                                                                                                                      |
| c25603.graph_c0 | 9.74293119    | 6.38969165    | 6.23604138    | 0              | 0              | 0              | 6.356E-37 | -Inf      | down      | -                                                                                                                      |
| c25604.graph_c0 | 2.5255257     | 3.63002717    | 3.32861592    | 16.5850452     | 17.8226479     | 14.2264363     | 7.605E-06 | 1.339782  | up        | PREDICTED: anthocyanidin 3-O-glucoside<br>&apos;&apos;&apos;-O-xylosyltransferase-like isoform X1<br>[Sesamum indicum] |
| c25609.graph_c0 | 2.64255414    | 2.36675813    | 2.94897266    | 37.926842      | 40.24676       | 38.0224656     | 5.997E-32 | 2.848164  | up        | PREDICTED: histidine-containing phosphotransfer protein<br>1 [Sesamum indicum]                                         |
| c25616.graph_c0 | 3.780455      | 3.37513347    | 3.15115742    | 1.88259553     | 2.19381986     | 2.17765884     | 0.0002206 | -1.739429 | down      | PREDICTED: mediator-associated protein 2-like isoform X2<br>[Sesamum indicum]                                          |

| #ID             | 0 h-1<br>FPKM | 0 h-2<br>FPKM | 0 h-3<br>FPKM | 48 h-1<br>FPKM | 48 h-2<br>FPKM | 48 h-3<br>FPKM | FDR       | log2FC    | regulated | nr_annotation                                                                              |
|-----------------|---------------|---------------|---------------|----------------|----------------|----------------|-----------|-----------|-----------|--------------------------------------------------------------------------------------------|
| c25625.graph_c0 | 10.4362608    | 9.55972623    | 10.9438889    | 1.76871699     | 2.64245552     | 2.2598064      | 6.038E-32 | -3.238081 | down      | PREDICTED: LOW QUALITY PROTEIN: benzyl alcohol O-benzoyltransferase-like [Sesamum indicum] |
| c25626.graph_c0 | 0.30293634    | 0.30323968    | 0.06488086    | 16.0938852     | 7.98272316     | 9.56062415     | 4.081E-07 | 4.654641  | up        | PREDICTED: serine/threonine-protein kinase WAG1 [Sesamum indicum]                          |
| c25628.graph_c0 | 0.51863669    | 0.43718402    | 0.66646868    | 6.31201519     | 7.67252048     | 6.84707692     | 9.743E-15 | 2.658806  | up        | PREDICTED: uncharacterized protein At5g08430 [Sesamum indicum]                             |
| c25645.graph_c0 | 0             | 0.0623051     | 0             | 4.75939417     | 5.46723001     | 3.41851784     | 1.676E-14 | 6.769578  | up        | -                                                                                          |
| c25649.graph_c0 | 10.8224193    | 6.1270056     | 12.0833373    | 94.8814738     | 104.757669     | 103.69509      | 1.94E-42  | 2.362622  | up        | PREDICTED: V-type proton ATPase subunit F [Sesamum indicum]                                |
| c25651.graph_c0 | 7.02898925    | 5.73159561    | 6.54604664    | 32.8871308     | 40.42819       | 41.9195672     | 8.71E-20  | 1.555917  | up        | PREDICTED: probable prolyl 4-hydroxylase 10 [Nicotiana tomentosiformis]                    |
| c25652.graph_c0 | 5.05442305    | 4.17957398    | 5.50674382    | 2.63191454     | 3.86057675     | 4.68372347     | 0.0015361 | -1.426625 | down      | -                                                                                          |
| c25675.graph_c0 | 11.2946547    | 13.5940764    | 12.267852     | 9.78600516     | 13.1228935     | 14.6595101     | 0.002374  | -1.007786 | down      | PREDICTED: cnaperone protein unaj 6-like [Sesamum indicum]                                 |
| c25683.graph_c0 | 0.15225949    | 0.30482391    | 0.13043965    | 9.02412505     | 29.1752338     | 38.3590801     | 5.291E-06 | 5.994378  | up        | PREDICTED: DNA-damage-repair/toleration protein DRT100-like [Sesamum indicum]              |
| c25690.graph_c0 | 16.7306371    | 16.3517826    | 17.7752028    | 380.115159     | 387.25734      | 495.781361     | 2.469E-44 | 3.613917  | up        | lipid transfer protein 2 [Tamarix hispida]                                                 |
| c25692.graph_c0 | 0.17288249    | 0.46148163    | 0.22216085    | 2.97305177     | 3.20583049     | 4.01534473     | 4.625E-06 | 2.554557  | up        | PREDICTED: uncharacterized protein LOC105177785 [Sesamum indicum]                          |
| c25695.graph_c0 | 16.1641509    | 19.5279928    | 12.8927011    | 3.5944928      | 3.80792926     | 2.28454148     | 2.268E-13 | -3.338409 | down      | PREDICTED: plasma membrane ATPase 4-like [Cicer arietinum]                                 |
| c25697.graph_c0 | 0.62249915    | 1.63569652    | 0.19998401    | 7.0252135      | 7.44236185     | 8.73863269     | 5.65E-06  | 2.229562  | up        | hypothetical protein F383_00208 [Gossypium arboreum]                                       |
| c25701.graph_c0 | 0             | 0             | 0             | 10.9134979     | 14.9126952     | 24.34728       | 3.57E-10  | Inf       | up        | unnamed protein product [Coffea canephora]                                                 |
| c25703.graph_c0 | 5.61586181    | 4.26816472    | 5.34563316    | 1.14971071     | 2.33445992     | 0.59675331     | 3.736E-10 | -2.924781 | down      | hypothetical protein MIMGU_mgv1a015966mg [Erythranthe guttata]                             |
| c25707.graph_c0 | 16.1342975    | 18.9433891    | 17.7713238    | 3.98607642     | 3.63078828     | 4.44177042     | 2.045E-58 | -3.149471 | down      | PREDICTED: heterogeneous nuclear ribonucleoprotein 1-like [Sesamum indicum]                |
| c25716.graph_c0 | 1.2244194     | 1.13809937    | 1.01148905    | 15.3087752     | 16.8152886     | 19.4287832     | 3.498E-13 | 2.914992  | up        | hypothetical protein MIMGU_mgv1a000915mg [Erythranthe guttata]                             |
| c25720.graph_c0 | 0.28448117    | 0.39867245    | 0.14622783    | 3.56432354     | 5.10866339     | 4.85055029     | 5.286E-08 | 3.010751  | up        | PREDICTED: transcription factor ICE1-like [Sesamum indicum]                                |
| c25720.graph_c1 | 0.17106692    | 0.34247643    | 0.32974164    | 2.67916602     | 2.50433959     | 3.57585872     | 4.321E-05 | 2.353834  | up        | PREDICTED: transcription factor ICE1-like, partial [Nicotiana glauca]                      |
| c25721.graph_c0 | 16.3504774    | 15.2447728    | 17.2359829    | 137.241817     | 138.977862     | 140.146145     | 2.193E-48 | 2.073395  | up        | PREDICTED: phospho-2-dehydro-3-deoxyheptonate aldolase 2, chloroplastic [Sesamum indicum]  |
| c25727.graph_c0 | 0             | 0             | 0             | 1.99083678     | 4.1070977      | 3.4496358      | 9.572E-09 | Inf       | up        | Homeobox-leucine zipper ATHB-13 -like protein [Gossypium arboreum]                         |
| c25731.graph_c0 | 1.6763807     | 1.38622293    | 2.4352002     | 156.722137     | 201.097447     | 229.429989     | 8.423E-59 | 5.710896  | up        | PREDICTED: major pollen allergen Lol p 11-like [Sesamum indicum]                           |



| #ID             | 0 h-1<br>FPKM | 0 h-2<br>FPKM | 0 h-3<br>FPKM | 48 h-1<br>FPKM | 48 h-2<br>FPKM | 48 h-3<br>FPKM | FDR       | log2FC    | regulated | nr_annotation                                                                                     |
|-----------------|---------------|---------------|---------------|----------------|----------------|----------------|-----------|-----------|-----------|---------------------------------------------------------------------------------------------------|
| c25741.graph_c0 | 0.66570715    | 0.49978031    | 0.32079752    | 4.67635794     | 4.14189745     | 3.81993        | 0.0001874 | 2.079969  | up        | PREDICTED: uncharacterized protein LOC105170714 [Sesamum indicum]                                 |
| c25751.graph_c0 | 0.29458342    | 0.0737196     | 0.18927568    | 10.4484944     | 13.6564509     | 15.8773569     | 2.975E-22 | 5.142234  | up        | -                                                                                                 |
| c25755.graph_c0 | 75.0770244    | 66.9483368    | 74.5678409    | 18.3523734     | 12.2024081     | 10.396169      | 3.08E-106 | -3.411057 | down      | PREDICTED: zinc finger protein CONSTANS-LIKE 1-like [Sesamum indicum]                             |
| c25776.graph_c0 | 0             | 0             | 0             | 16.3861891     | 16.459741      | 11.0296816     | 4.379E-24 | Inf       | up        | --                                                                                                |
| c25778.graph_c0 | 9.34441613    | 9.18370455    | 9.16970322    | 7.30433932     | 9.5343976      | 10.9560593     | 4.158E-08 | -1.018106 | down      | PREDICTED: uncharacterized protein LOC105170433 [Sesamum indicum]                                 |
| c25782.graph_c0 | 5.23884172    | 5.57479585    | 3.63898326    | 60.8295623     | 58.3612851     | 54.5513567     | 5.848E-48 | 2.575375  | up        | PREDICTED: uncharacterized protein LOC105165646 [Sesamum indicum]                                 |
| c25784.graph_c0 | 0             | 0.04984908    | 0             | 53.9987401     | 61.7737504     | 81.0729311     | 3.24E-57  | 10.9369   | up        | PREDICTED: uncharacterized protein LOC105164223 [Sesamum indicum]                                 |
| c25786.graph_c1 | 1.69570615    | 2.73470667    | 2.54222446    | 7.89776414     | 10.9410999     | 13.7458701     | 0.0006495 | 1.197301  | up        | PREDICTED: pentatricopeptide repeat-containing protein At1g59720, mitochondrial [Sesamum indicum] |
| c25787.graph_c0 | 0.2619825     | 0.61190461    | 0.44887717    | 8.44743773     | 7.15922878     | 7.01538068     | 9.532E-09 | 3.080595  | up        | PREDICTED: uncharacterized protein LOC105177716 [Sesamum indicum]                                 |
| c25799.graph_c0 | 19.0708916    | 18.6908944    | 22.2867179    | 300.331803     | 304.286747     | 315.875799     | 1.277E-89 | 2.918423  | up        | PREDICTED: 60S ribosomal protein L11 [Sesamum indicum]                                            |
| c25801.graph_c0 | 2.22893739    | 1.673377      | 2.27839881    | 9.47383701     | 11.4948705     | 10.5683484     | 1.172E-08 | 1.329431  | up        | hypothetical protein MIMGU_mgv1a003796mg [Erythranthe guttata]                                    |
| c25802.graph_c0 | 45.4154571    | 42.6499905    | 42.1889659    | 31.1402208     | 30.9591779     | 25.1222656     | 6.881E-29 | -1.593744 | down      | hypothetical protein MIMGU_mgv1a008591mg [Erythranthe guttata]                                    |
| c25803.graph_c0 | 17.365853     | 16.4683348    | 11.6864367    | 7.24145189     | 7.58223741     | 7.41740272     | 1.88E-13  | -2.047558 | down      | PREDICTED: uncharacterized protein LOC105171564 [Sesamum indicum]                                 |
| c25804.graph_c0 | 8.46040903    | 7.84616902    | 8.63361574    | 172.964257     | 145.713445     | 169.30301      | 3.825E-51 | 3.274475  | up        | PREDICTED: photosystem II 10 kDa polypeptide, chloroplastic [Sesamum indicum]                     |
| c25813.graph_c0 | 0             | 0             | 0             | 23.3801582     | 18.7062364     | 11.3473768     | 3.395E-11 | Inf       | up        | PREDICTED: root phototropism protein 2-like [Malus domestica]                                     |
| c25815.graph_c0 | 3.17671004    | 2.62686651    | 3.99345473    | 61.7129286     | 62.8161896     | 64.5921191     | 1.222E-57 | 3.249467  | up        | hypothetical protein MIMGU_mgv1a012869mg [Erythranthe guttata]                                    |
| c25818.graph_c0 | 0.43468377    | 0.34809523    | 0.44686869    | 525.402264     | 607.847917     | 599.482943     | 0         | 9.43937   | up        | PREDICTED: kirola-like isoform X2 [Sesamum indicum]                                               |
| c25826.graph_c0 | 20.352421     | 20.2879142    | 17.4357778    | 21.3280996     | 18.7046337     | 16.1970119     | 3.678E-07 | -1.058641 | down      | PREDICTED: uncharacterized protein LOC105155579 [Sesamum indicum]                                 |
| c25832.graph_c0 | 0.25351165    | 0.03625222    | 0             | 1.5681313      | 3.07507047     | 2.34531468     | 3.869E-07 | 3.584567  | up        | unnamed protein product [Coffea canephora]                                                        |
| c25837.graph_c0 | 1.12303395    | 1.51329029    | 1.38763759    | 0.11937832     | 0.12646686     | 0.31866634     | 6.646E-12 | -3.860666 | down      | PREDICTED: uncharacterized protein LOC104248035 [Nicotiana glauca]                                |
| c25838.graph_c0 | 24.6119354    | 26.6700761    | 21.2856826    | 12.3088081     | 8.92189294     | 7.10938995     | 9.982E-39 | -2.363641 | down      | PREDICTED: myb-related protein 50b-like [Sesamum indicum]                                         |
| c25840.graph_c0 | 0.40941551    | 0.51228184    | 0.7891727     | 4.33757309     | 4.8948153      | 4.69857829     | 0.0001943 | 1.999513  | up        | -                                                                                                 |

| #ID             | 0 h-1<br>FPKM | 0 h-2<br>FPKM | 0 h-3<br>FPKM | 48 h-1<br>FPKM | 48 h-2<br>FPKM | 48 h-3<br>FPKM | FDR       | log2FC    | regulated | nr_annotation                                                                           |
|-----------------|---------------|---------------|---------------|----------------|----------------|----------------|-----------|-----------|-----------|-----------------------------------------------------------------------------------------|
| c25843.graph_c0 | 0.27103202    | 0.13565171    | 0.08707172    | 1.24846189     | 1.68630733     | 1.49967974     | 0.000176  | 2.153751  | up        | PREDICTED: serine/threonine-protein kinase D6PKL1-like [Sesamum indicum]                |
| c25846.graph_c0 | 0.17472218    | 0.1165981     | 0.07484164    | 4.61434356     | 3.58099141     | 3.10323238     | 8.425E-10 | 3.94351   | up        | PREDICTED: glucan endo-1,3-beta-glucosidase 5-like [Sesamum indicum]                    |
| c25849.graph_c0 | 0.43318055    | 0.28907621    | 0.33399249    | 24.2637098     | 23.9851909     | 25.472062      | 7.591E-88 | 5.108881  | up        | PREDICTED: cell division cycle 20.2, cofactor of APC complex-like [Sesamum indicum]     |
| c25850.graph_c0 | 30.1776056    | 31.3102992    | 29.579921     | 0.50732808     | 0.80617887     | 0.67712621     | 1.5E-164  | -6.539944 | down      | PREDICTED: vacuolar iron transporter 1 [Nicotiana glauca]                               |
| c25855.graph_c0 | 9.58700699    | 12.079826     | 6.77416562    | 166.740059     | 253.057471     | 300.054302     | 2.203E-14 | 3.639988  | up        | PREDICTED: luminal-binding protein 3 [Sesamum indicum]                                  |
| c25856.graph_c0 | 0.63795113    | 0.77741385    | 0.89107877    | 3.16858923     | 3.65451105     | 4.27456152     | 0.0011196 | 1.242353  | up        | PREDICTED: bifunctional epoxide hydrolase 2-like [Sesamum indicum]                      |
| c25862.graph_c0 | 1.24426506    | 1.09723589    | 1.25630204    | 16.0754667     | 18.273285      | 20.5208086     | 3.87E-36  | 2.909529  | up        | PREDICTED: cell division protein FtsZ homolog 2-2, chloroplastic [Sesamum indicum]      |
| c25863.graph_c0 | 2.09072745    | 2.65755047    | 2.64402203    | 2.32356669     | 3.01214416     | 1.985884       | 0.0042997 | -1.035053 | down      | PREDICTED: protein MID1-COMPLEMENTING ACTIVITY 1 [Sesamum indicum]                      |
| c25866.graph_c0 | 2.3414135     | 2.61161614    | 2.40704724    | 10.2922713     | 16.0613155     | 14.1482891     | 2.01E-05  | 1.435707  | up        | PREDICTED: protein DAI-related 1-like [Sesamum indicum]                                 |
| c25870.graph_c0 | 0.73219586    | 0.97723873    | 0.41817808    | 7.34506285     | 13.2598059     | 18.2062941     | 3.123E-05 | 3.166058  | up        | PREDICTED: transcription factor DIVARICATA-like [Sesamum indicum]                       |
| c25871.graph_c0 | 33.5445046    | 30.3021827    | 29.8062333    | 15.3386316     | 17.5669409     | 16.9345263     | 2.331E-35 | -1.928834 | down      | hypothetical protein MIMGU_mgv1a005352mg [Erythranthe guttata]                          |
| c25878.graph_c0 | 1.558299      | 1.49746502    | 1.52188169    | 8.35523086     | 9.21635826     | 11.215521      | 6.068E-09 | 1.632076  | up        | hypothetical protein MIMGU_mgv1a004635mg [Erythranthe guttata]                          |
| c25880.graph_c0 | 7.72696086    | 9.0117668     | 9.06333032    | 2.01803991     | 3.68841063     | 4.22271332     | 5.97E-33  | -2.407362 | down      | PREDICTED: uncharacterized protein LOC105170968 [Sesamum indicum]                       |
| c25882.graph_c0 | 37.6074378    | 40.7464205    | 36.596318     | 33.4741293     | 31.8305595     | 29.6830364     | 4.682E-20 | -1.29047  | down      | PREDICTED: putative nuclear matrix constituent protein 1-like protein [Sesamum indicum] |
| c25883.graph_c0 | 11.3283925    | 12.1217869    | 12.5495111    | 8.63706542     | 8.5780533      | 9.28629406     | 0.0002746 | -1.460677 | down      | hypothetical protein CICLE_V10000000mg [Citrus clamentinal]                             |
| c25884.graph_c0 | 0.77774645    | 1.02876551    | 1.0708232     | 0.02558967     | 0.02710915     | 0.04553907     | 2.358E-18 | -5.897324 | down      | -                                                                                       |
| c25886.graph_c0 | 0             | 0             | 0             | 26.085761      | 25.0668745     | 30.9650549     | 4.318E-64 | Inf       | up        | hypothetical protein MIMGU_mgv1a010584mg [Erythranthe guttata]                          |
| c25892.graph_c0 | 1.11969429    | 0.74721033    | 0.83933004    | 8.9399736      | 10.1993425     | 9.48449143     | 5.989E-07 | 2.385258  | up        | PREDICTED: 3-phosphoinositide-dependent protein kinase 2 [Nicotiana glauca]             |
| c25894.graph_c0 | 75.0972479    | 76.0151868    | 76.0195032    | 35.471267      | 46.7253832     | 41.8221096     | 4.177E-39 | -1.894841 | down      | PREDICTED: uncharacterized protein LOC105164821 isoform X1 [Sesamum indicum]            |
| c25905.graph_c0 | 1.26373636    | 1.58125225    | 1.50795474    | 13.4718779     | 15.9897255     | 16.6118858     | 3.397E-16 | 2.38197   | up        | PREDICTED: uncharacterized protein LOC102616798 [Citrus sinensis]                       |
| c25908.graph_c0 | 0             | 0.018544      | 0.04761188    | 3.05496718     | 2.33235408     | 2.12603798     | 3.448E-19 | 5.796058  | up        | PREDICTED: putative receptor-like protein kinase At3g47110 [Sesamum indicum]            |

| #ID             | 0 h-1<br>FPKM | 0 h-2<br>FPKM | 0 h-3<br>FPKM | 48 h-1<br>FPKM | 48 h-2<br>FPKM | 48 h-3<br>FPKM | FDR       | log2FC    | regulated | nr_annotation                                                                                                        |
|-----------------|---------------|---------------|---------------|----------------|----------------|----------------|-----------|-----------|-----------|----------------------------------------------------------------------------------------------------------------------|
| c25914.graph_c0 | 5.57398691    | 5.69828264    | 3.04799739    | 22.0700915     | 20.255458      | 20.5127878     | 0.0019669 | 1.123656  | up        | PREDICTED: uncharacterized protein LOC105157918 [Sesamum indicum]                                                    |
| c25915.graph_c0 | 339.022346    | 362.994381    | 337.218742    | 49.78607       | 54.9892654     | 43.921892      | 1.61E-126 | -3.822465 | down      | MYB-related transcription factor [Salvia miltiorrhiza]                                                               |
| c25916.graph_c0 | 0.35866772    | 0.37897281    | 0.20484543    | 1.3400695      | 1.98360817     | 1.68240734     | 0.0036243 | 1.391246  | up        | PREDICTED: putative pentatricopeptide repeat-containing protein At3g25970 [Sesamum indicum]                          |
| c25918.graph_c0 | 173.437929    | 173.357225    | 168.502999    | 76.6721086     | 96.9737332     | 107.228918     | 3.829E-40 | -1.897648 | down      | PREDICTED: probable calcium-binding protein CML49 [Sesamum indicum]                                                  |
| c25922.graph_c0 | 0             | 0             | 0             | 3.23186973     | 4.96199144     | 6.50157865     | 1.293E-13 | Inf       | up        | hypothetical protein MIMGU_mgv1a027056mg [Erythranthe guttata]                                                       |
| c25924.graph_c0 | 27.2664905    | 32.9951641    | 30.9896242    | 282.1218       | 245.059989     | 218.447007     | 4.836E-16 | 2.01624   | up        | hypothetical protein MIMGU_mgv1a012865mg [Erythranthe guttata]                                                       |
| c25927.graph_c0 | 2.18595484    | 3.71984436    | 2.52813466    | 26.7841275     | 29.0145625     | 25.2658807     | 4.281E-07 | 2.247643  | up        | PREDICTED: V-type proton ATPase subunit H [Beta vulgaris subsp. vulgaris]                                            |
| c25928.graph_c0 | 0             | 0.12266246    | 0             | 14.5630184     | 18.1784367     | 25.6148216     | 2.857E-18 | 7.881743  | up        | BnaA07g08260D [Brassica napus]                                                                                       |
| c25929.graph_c0 | 0.18163122    | 0.44443201    | 0.18153591    | 4.98273124     | 6.16493158     | 8.3874529      | 2.219E-13 | 3.576487  | up        | PREDICTED: leucine-rich repeat receptor-like protein kinase TDR [Sesamum indicum]                                    |
| c25930.graph_c0 | 38.1017241    | 34.8856215    | 29.3272024    | 26.5958981     | 28.8097041     | 27.1826212     | 1.328E-16 | -1.32507  | down      | -                                                                                                                    |
| c25931.graph_c0 | 0.37946311    | 0.25322873    | 0.43344456    | 2.56363192     | 3.82688964     | 4.87326821     | 1.949E-06 | 2.37206   | up        | PREDICTED: putative GATA transcription factor 22 [Nicotiana tomentosiformis]                                         |
| c25936.graph_c0 | 90.9913325    | 99.3036651    | 89.1537202    | 2.58848683     | 2.95312546     | 2.48039079     | 5.68E-131 | -6.140603 | down      | PREDICTED: heat shock 70 kDa protein-like [Sesamum indicum]                                                          |
| c25937.graph_c0 | 25.4693758    | 31.0309105    | 25.43523      | 9.92194123     | 9.8008846      | 12.168991      | 6.396E-19 | -2.379421 | down      | PREDICTED: DEAD-box ATP-dependent RNA helicase 37-like [Vitis vinifera]                                              |
| c25938.graph_c0 | 1.93217941    | 1.02078249    | 2.20704626    | 13.4492644     | 14.3002467     | 15.3548126     | 4.417E-11 | 2.039454  | up        | PREDICTED: ataxin-3 homolog [Sesamum indicum]                                                                        |
| c25940.graph_c0 | 17.1041175    | 15.133554     | 17.1660226    | 10.6019639     | 14.3146507     | 13.687916      | 5.86E-14  | -1.378998 | down      | PREDICTED: clavaminic synthase-like protein At3g21360 [Sesamum indicum]                                              |
| c25945.graph_c0 | 0             | 0             | 0             | 9.2013087      | 1.90471729     | 14.1630346     | 4.74E-05  | Inf       | up        | --                                                                                                                   |
| c25949.graph_c0 | 3.9174485     | 4.09643244    | 4.26997553    | 0.06444659     | 0.40964009     | 0.86016283     | 7.635E-27 | -4.243954 | down      | PREDICTED: abscisic acid 8'-hydroxylase 4-like [Sesamum indicum]                                                     |
| c25951.graph_c0 | 11.5817472    | 13.5495928    | 12.6360138    | 9.24847627     | 10.4200302     | 11.315203      | 2.049E-16 | -1.306229 | down      | PREDICTED: LOW QUALITY PROTEIN: pentatricopeptide repeat-containing protein At1g74750-like [Sesamum indicum]         |
| c25952.graph_c0 | 0.25653754    | 0.237041      | 0.40573648    | 2.45429077     | 4.33337246     | 4.61027225     | 9.435E-08 | 2.630507  | up        | PREDICTED: probably inactive leucine-rich repeat receptor-like protein kinase At2g25790 isoform X1 [Sesamum indicum] |
| c25953.graph_c0 | 0.20442775    | 0.13642164    | 0.26269776    | 22.0976426     | 30.991347      | 37.202059      | 3.215E-27 | 6.195733  | up        | PREDICTED: probable pectate lyase 5 [Sesamum indicum]                                                                |
| c25953.graph_c1 | 0             | 0.09716702    | 0             | 9.21098613     | 11.1789797     | 13.2884657     | 1.383E-19 | 7.426555  | up        | PREDICTED: probable pectate lyase 5 [Sesamum indicum]                                                                |
| c25955.graph_c0 | 1.07686384    | 1.02404504    | 0.48433443    | 101.092667     | 122.019417     | 117.449133     | 8.43E-178 | 6.028086  | up        | PREDICTED: probable xyloglucan endotransglucosylase/hydrolase protein 7 [Sesamum indicum]                            |

| #ID             | 0 h-1<br>FPKM | 0 h-2<br>FPKM | 0 h-3<br>FPKM | 48 h-1<br>FPKM | 48 h-2<br>FPKM | 48 h-3<br>FPKM | FDR       | log2FC    | regulated | nr_annotation                                                                                         |
|-----------------|---------------|---------------|---------------|----------------|----------------|----------------|-----------|-----------|-----------|-------------------------------------------------------------------------------------------------------|
| c25956.graph_c0 | 0             | 0             | 0.05689686    | 5.99616837     | 5.79045295     | 6.71456185     | 1.696E-22 | 7.294693  | up        | PREDICTED: protein POLYCHROME-like [Sesamum indicum]                                                  |
| c25958.graph_c0 | 2.64049313    | 2.40285198    | 2.36491451    | 45.8507205     | 49.9789362     | 67.3621111     | 1.555E-21 | 3.440765  | up        | -                                                                                                     |
| c25959.graph_c0 | 8.09861645    | 6.99532001    | 7.72135432    | 41.276032      | 44.4918538     | 46.8994119     | 2.407E-15 | 1.52047   | up        | hypothetical protein MIMGU_mgv1a015224mg [Erythranthe guttata]                                        |
| c25961.graph_c0 | 3.85559542    | 5.89074896    | 3.2596005     | 2.3368592      | 2.47561896     | 3.16057136     | 0.0001384 | -1.723069 | down      | --                                                                                                    |
| c25963.graph_c0 | 22.6491364    | 21.6619356    | 22.7524899    | 126.403439     | 117.859715     | 114.457837     | 1.244E-22 | 1.403232  | up        | PREDICTED: uncharacterized protein LOC105175919 isoform X1 [Sesamum indicum]                          |
| c25966.graph_c0 | 0.47030611    | 0.21969596    | 0.40290798    | 1.96418756     | 1.62181446     | 1.87623127     | 0.0082936 | 1.305816  | up        | PREDICTED: protein NRT1/ PTR FAMILY 6.2-like [Sesamum indicum]                                        |
| c25968.graph_c0 | 0.52086309    | 0.78207698    | 0.7529959     | 16.0150955     | 13.2169991     | 14.0900217     | 2.015E-17 | 3.380888  | up        | PREDICTED: probable lipid phosphate phosphatase beta [Sesamum indicum]                                |
| c25969.graph_c0 | 59.5538359    | 65.0205875    | 55.0106683    | 274.946441     | 279.674238     | 293.464128     | 4.792E-17 | 1.222609  | up        | unnamed protein product [Coffea canephora]                                                            |
| c25975.graph_c0 | 0.77442366    | 0.65593772    | 1.76067664    | 4.00629381     | 4.94185634     | 5.22508284     | 0.0075713 | 1.118813  | up        | hypothetical protein MIMGU_mgv1a014840mg [Erythranthe guttata]                                        |
| c25976.graph_c0 | 19.3563291    | 10.6376456    | 13.8186941    | 0              | 0              | 0              | 4.579E-30 | -Inf      | down      | cytochrome c oxidase subunit I [Lingulodinium polyedrum]                                              |
| c25977.graph_c0 | 0             | 0             | 0             | 2.07516035     | 1.51444008     | 1.55923728     | 1.156E-11 | Inf       | up        | ATP synthase F1, gamma subunit [Mucor circinelloides f. circinelloides 1006PhL]                       |
| c25980.graph_c0 | 0.85810301    | 1.18618599    | 1.10269634    | 17.8059828     | 18.5841191     | 22.4758847     | 4.803E-32 | 3.204333  | up        | PREDICTED: thioredoxin-like protein CITRX1, chloroplastic [Sesamum indicum]                           |
| c25983.graph_c0 | 12.9533551    | 7.0480859     | 8.0810464     | 0              | 0              | 0              | 3.143E-24 | -Inf      | down      | ats1, partial [Pyramimonas parkeae]                                                                   |
| c25985.graph_c1 | 3.75394778    | 4.0395348     | 3.85917722    | 2.42086708     | 2.47302173     | 2.61566004     | 0.0002595 | -1.652132 | down      | PREDICTED: plasma membrane ATPase 4 [Sesamum indicum]                                                 |
| c25987.graph_c0 | 0             | 0             | 0             | 7.16165563     | 6.51911901     | 8.11890722     | 2.903E-22 | Inf       | up        | hypothetical protein MIMGU_mgv1a011925mg [Erythranthe guttata]                                        |
| c25990.graph_c0 | 109.405698    | 118.806256    | 113.26768     | 3.45675385     | 2.56983266     | 3.56145123     | 6.76E-261 | -6.16891  | down      | PREDICTED: espin-like [Sesamum indicum]                                                               |
| c25992.graph_c0 | 26.401189     | 29.9315132    | 31.1819514    | 17.4356778     | 20.960806      | 22.0310817     | 8.224E-20 | -1.556866 | down      | hypothetical protein MIMGU_mgv1a027010mg [Erythranthe guttata]                                        |
| c25994.graph_c0 | 1.67740909    | 1.4815489     | 1.33136114    | 0.63631592     | 0.28889981     | 0.16176859     | 2.835E-09 | -3.040708 | down      | PREDICTED: pathogenesis-related genes transcriptional activator PTI6-like [Nicotiana tomentosiformis] |
| c25995.graph_c0 | 2.08489621    | 1.62320971    | 1.48843009    | 1.60061864     | 1.58261728     | 1.23432473     | 0.0069035 | -1.24691  | down      | -                                                                                                     |
| c25999.graph_c0 | 5.2469955     | 5.07599959    | 4.57048519    | 112.639008     | 169.058565     | 161.018983     | 1.651E-31 | 3.870561  | up        | PREDICTED: glutamate decarboxylase [Sesamum indicum]                                                  |
| c26000.graph_c0 | 2.08330899    | 1.25123707    | 0.96376843    | 14.970385      | 11.1421803     | 13.6621113     | 7.415E-08 | 2.203017  | up        | PREDICTED: uncharacterized protein LOC105169481 [Sesamum indicum]                                     |
| c26003.graph_c0 | 0.27318352    | 0.41018561    | 0.35105164    | 4.0267917      | 8.59844972     | 7.55792235     | 5.521E-07 | 3.255882  | up        | PREDICTED: uncharacterized protein LOC105170399 [Sesamum indicum]                                     |
| c26004.graph_c0 | 3.00873073    | 1.28369396    | 2.47192109    | 25.4009508     | 28.9791679     | 31.8201603     | 2.106E-30 | 2.650702  | up        | unnamed protein product [Vitis vinifera]                                                              |
| c26005.graph_c0 | 5.20278063    | 2.25036624    | 3.30161931    | 0              | 0              | 0              | 3.129E-13 | -Inf      | down      | uncharacterized protein LOC100273290 [Zea mays]                                                       |

| #ID             | 0 h-1<br>FPKM | 0 h-2<br>FPKM | 0 h-3<br>FPKM | 48 h-1<br>FPKM | 48 h-2<br>FPKM | 48 h-3<br>FPKM | FDR       | log2FC    | regulated | nr_annotation                                                                                     |
|-----------------|---------------|---------------|---------------|----------------|----------------|----------------|-----------|-----------|-----------|---------------------------------------------------------------------------------------------------|
| c26007.graph_c0 | 0             | 0             | 0             | 2.07890971     | 2.59100324     | 2.36665762     | 1.493E-15 | Inf       | up        | PREDICTED: mitotic checkpoint serine/threonine-protein kinase BUB1 [Sesamum indicum]              |
| c26009.graph_c0 | 177.484823    | 173.577147    | 170.383878    | 737.147414     | 807.881738     | 836.743352     | 1.893E-16 | 1.17238   | up        | PREDICTED: 40S ribosomal protein S20-2-like [Glycine max]                                         |
| c26010.graph_c0 | 24.0990123    | 22.6988992    | 22.8547491    | 16.5487807     | 18.5728974     | 22.0146123     | 3.446E-10 | -1.306302 | down      | PREDICTED: uncharacterized protein LOC105158897 [Sesamum indicum]                                 |
| c26011.graph_c0 | 38.663364     | 40.9215536    | 34.1911078    | 8.26646604     | 10.921289      | 10.9621791     | 2.963E-81 | -2.937029 | down      | PREDICTED: LOW QUALITY PROTEIN: benzyl alcohol O-benzoyltransferase-like [Sesamum indicum]        |
| c26012.graph_c0 | 5.10174751    | 7.76242133    | 4.72028223    | 28.5763804     | 32.2648686     | 28.7727614     | 0.0006222 | 1.332997  | up        | Os03g0113500 [Oryza sativa Japonica Group]                                                        |
| c26013.graph_c0 | 11.1937394    | 11.6105573    | 12.8873795    | 45.1692578     | 56.1066985     | 54.9724445     | 6.08E-12  | 1.107437  | up        | PREDICTED: COBW domain-containing protein 1 [Sesamum indicum]                                     |
| c26016.graph_c0 | 0.94593453    | 0.69623657    | 1.21556332    | 6.38213795     | 6.51672412     | 6.43139842     | 5.36E-08  | 1.736095  | up        | PREDICTED: probable aminotransferase ACS10 [Sesamum indicum]                                      |
| c26017.graph_c0 | 17.4103225    | 14.6648193    | 16.6432948    | 148.659009     | 147.746916     | 151.072993     | 6.18E-27  | 2.181672  | up        | PREDICTED: 60S ribosomal protein L34-like [Sesamum indicum]                                       |
| c26026.graph_c0 | 0             | 0             | 0             | 4.05503985     | 4.66403643     | 5.97922013     | 3.906E-12 | Inf       | up        | -                                                                                                 |
| c26027.graph_c0 | 0.12256295    | 0.06134284    | 0.07874912    | 1.1291298      | 3.05024907     | 3.114548       | 0.0001541 | 3.765179  | up        | PREDICTED: probable xyloglucan endotransglucosylase/hydrolase protein 32 [Sesamum indicum]        |
| c26029.graph_c0 | 42.8225006    | 37.366942     | 36.8778111    | 30.4659942     | 27.1329038     | 26.0057415     | 1.963E-22 | -1.499341 | down      | PREDICTED: abscisic acid receptor PYL9-like [Sesamum indicum]                                     |
| c26030.graph_c0 | 0             | 0             | 0             | 6.20351248     | 8.35175051     | 8.27977215     | 1.087E-13 | Inf       | up        | PREDICTED: uncharacterized protein LOC105174742 [Sesamum indicum]                                 |
| c26030.graph_c1 | 0             | 0             | 0             | 3.5391078      | 8.65212825     | 7.14598206     | 5.282E-08 | Inf       | up        | -                                                                                                 |
| c26034.graph_c0 | 1.68880236    | 1.37352592    | 1.28854312    | 0.14585952     | 0.2060273      | 0.12978492     | 4.54E-13  | -4.194012 | down      | -                                                                                                 |
| c26035.graph_c0 | 0.09157801    | 0             | 0.11768136    | 306.338876     | 333.675169     | 335.887365     | 0         | 11.15897  | up        | PREDICTED: polyphenol oxidase I, chloroplastic-like [Sesamum indicum]                             |
| c26038.graph_c0 | 0.58814789    | 0.5352153     | 0.27483394    | 2.39723239     | 2.66133758     | 3.63786095     | 2.879E-05 | 1.621978  | up        | PREDICTED: DNA mismatch repair protein MSH2-like isoform X1 [Sesamum indicum]                     |
| c26039.graph_c0 | 0.398227      | 0             | 0.12793436    | 126.571076     | 81.9094889     | 66.5939862     | 3.008E-16 | 8.031451  | up        | PREDICTED: uncharacterized protein LOC105177716 [Sesamum indicum]                                 |
| c26040.graph_c0 | 2.16534794    | 1.89915706    | 2.43805067    | 1.63388514     | 2.19381915     | 2.28216114     | 0.000522  | -1.114814 | down      | PREDICTED: pentatricopeptide repeat-containing protein At1g06710, mitochondrial [Sesamum indicum] |
| c26045.graph_c0 | 0.11283371    | 0.02823667    | 0.07249789    | 6.9126601      | 7.48830845     | 9.59624063     | 6.343E-35 | 5.792748  | up        | PREDICTED: uncharacterized protein LOC105165819 [Sesamum indicum]                                 |
| c26048.graph_c0 | 1.43467578    | 2.20203899    | 1.78216134    | 48.9475826     | 45.7398272     | 48.9239193     | 1.371E-71 | 3.710948  | up        | PREDICTED: uncharacterized protein LOC105164113 [Sesamum indicum]                                 |
| c26049.graph_c0 | 1.23404064    | 1.28278697    | 0.97587143    | 22.4314918     | 24.8751858     | 25.8733047     | 7.964E-36 | 3.371947  | up        | PREDICTED: LOW QUALITY PROTEIN: plasma membrane ATPase 3 [Sesamum indicum]                        |
| c26053.graph_c0 | 7.23232055    | 8.49084506    | 7.74484854    | 1.97418827     | 2.30926862     | 2.41535367     | 7.94E-23  | -2.829509 | down      | -                                                                                                 |

| #ID             | 0 h-1<br>FPKM | 0 h-2<br>FPKM | 0 h-3<br>FPKM | 48 h-1<br>FPKM | 48 h-2<br>FPKM | 48 h-3<br>FPKM | FDR       | log2FC    | regulated | nr_annotation                                                                     |
|-----------------|---------------|---------------|---------------|----------------|----------------|----------------|-----------|-----------|-----------|-----------------------------------------------------------------------------------|
| c26054.graph_c0 | 1.75640471    | 2.05119073    | 2.91535572    | 0.13484288     | 0.42854905     | 0.23996477     | 3.246E-11 | -4.103434 | down      | PREDICTED: solute carrier family 40 member 2 isoform X2 [Sesamum indicum]         |
| c26056.graph_c0 | 10.7537969    | 12.8011046    | 9.33719918    | 6.96174534     | 9.07707696     | 7.38577282     | 0.000777  | -1.508572 | down      | PREDICTED: ubiquitin-activating enzyme E1 1-like isoform X1 [Sesamum indicum]     |
| c26057.graph_c0 | 120.065047    | 116.530154    | 120.726648    | 43.6175209     | 45.2410436     | 46.0654011     | 4.703E-63 | -2.42351  | down      | hypothetical protein MIMGU_mgv1a015990mg [Erythranthe guttata]                    |
| c26058.graph_c0 | 6.13329594    | 5.28936155    | 7.33588386    | 26.6003082     | 32.6001621     | 35.7739129     | 1.34E-12  | 1.31549   | up        | hypothetical protein MIMGU_mgv1a007272mg [Erythranthe guttata]                    |
| c26061.graph_c0 | 1.34106015    | 1.94416989    | 1.78274005    | 5.92174548     | 9.70341603     | 10.7657117     | 0.0003237 | 1.352365  | up        | PREDICTED: uncharacterized protein LOC105157642 [Sesamum indicum]                 |
| c26065.graph_c0 | 143.336503    | 154.010305    | 146.326241    | 98.4862748     | 118.803114     | 136.176636     | 1.549E-18 | -1.349777 | down      | PREDICTED: DEAD-box ATP-dependent RNA helicase 3, chloroplastic [Sesamum indicum] |
| c26067.graph_c0 | 1.53308309    | 0.86739292    | 1.3704852     | 6.69343475     | 6.18012694     | 8.08674442     | 0.0006516 | 1.455908  | up        | PREDICTED: probable glutathione peroxidase 2 [Sesamum indicum]                    |
| c26068.graph_c0 | 3.91822867    | 2.85247432    | 2.68101608    | 0.89071206     | 0.79461172     | 0.54227121     | 1.869E-12 | -3.094381 | down      | PREDICTED: flavonol synthase/flavanone 3-hydroxylase-like [Sesamum indicum]       |
| c26072.graph_c0 | 0             | 0             | 0             | 3.66255461     | 7.76006501     | 6.60836367     | 1.563E-10 | Inf       | up        | PREDICTED: uncharacterized protein LOC105161043 [Sesamum indicum]                 |
| c26073.graph_c0 | 7.93912324    | 11.6185279    | 9.54581304    | 70.6595967     | 111.693857     | 134.041701     | 1.167E-07 | 2.415489  | up        | -                                                                                 |
| c26074.graph_c0 | 2292.59361    | 2294.71831    | 2444.78119    | 432.284196     | 418.359036     | 447.234273     | 1.272E-62 | -3.455813 | down      | PREDICTED: embryonic protein DC-8 [Nicotiana glauca]                              |
| c26076.graph_c0 | 8.36624157    | 9.43246572    | 8.31784154    | 10.3848791     | 8.12221603     | 7.50782739     | 6.213E-06 | -1.0169   | down      | -                                                                                 |
| c26077.graph_c0 | 0.24586172    | 0.04101798    | 0.10531401    | 0.83051411     | 1.27975127     | 1.78028557     | 0.000984  | 2.288854  | up        | PREDICTED: probable magnesium transporter NIPA1 [Sesamum indicum]                 |
| c26079.graph_c0 | 0             | 0             | 0             | 0.81857508     | 1.36747779     | 1.20460065     | 1.28E-11  | Inf       | up        | PREDICTED: putative E3 ubiquitin-protein ligase XBAT31 [Sesamum indicum]          |
| c26080.graph_c0 | 6.52652376    | 6.48201956    | 6.22460887    | 29.5935579     | 33.4408386     | 29.048981      | 3.041E-10 | 1.241097  | up        | hypothetical protein MIMGU_mgv1a007824mg [Erythranthe guttata]                    |
| c26082.graph_c0 | 1.18204939    | 1.38723873    | 1.414223      | 15.6963468     | 19.4130324     | 22.5535828     | 1.03E-24  | 2.831779  | up        | PREDICTED: uncharacterized protein LOC105156132 [Sesamum indicum]                 |
| c26084.graph_c0 | 7.69898482    | 3.51334588    | 4.75275995    | 0              | 0              | 0              | 2.939E-17 | -Inf      | down      | NADH dehydrogenase subunit 4 (mitochondrion) [Saccharina latissima]               |
| c26085.graph_c0 | 0.15990915    | 0             | 0             | 5.45079348     | 4.2137913      | 4.98116659     | 4.499E-10 | 5.524671  | up        | PREDICTED: cycloartenol synthase-like isoform X1 [Sesamum indicum]                |
| c26086.graph_c0 | 0.39647589    | 0.46690929    | 0.29969836    | 14.5888921     | 15.136499      | 15.7914515     | 1.451E-58 | 4.275363  | up        | PREDICTED: protein FAR1-RELATED SEQUENCE 6 isoform X1 [Sesamum indicum]           |
| c26089.graph_c1 | 0             | 0.04730302    | 0             | 37.788407      | 51.5161368     | 55.6653692     | 1.235E-66 | 10.56962  | up        | Phosphoenolpyruvate carboxylase family protein [Theobroma cacao]                  |

| #ID             | 0 h-1<br>FPKM | 0 h-2<br>FPKM | 0 h-3<br>FPKM | 48 h-1<br>FPKM | 48 h-2<br>FPKM | 48 h-3<br>FPKM | FDR       | log2FC    | regulated | nr_annotation                                                                                          |
|-----------------|---------------|---------------|---------------|----------------|----------------|----------------|-----------|-----------|-----------|--------------------------------------------------------------------------------------------------------|
| c26091.graph_c0 | 1.50137122    | 1.42773089    | 1.35052502    | 0.41494833     | 0.14652915     | 0.12307284     | 1.39E-10  | -3.637283 | down      | PREDICTED: uncharacterized protein LOC105162488 [Sesamum indicum]                                      |
| c26092.graph_c0 | 1.28159516    | 0.85525232    | 0.90030562    | 5.35245703     | 10.5567257     | 13.9235546     | 0.0007735 | 2.268336  | up        | PREDICTED: receptor-like protein kinase THESEUS 1 [Sesamum indicum]                                    |
| c26096.graph_c0 | 0.13697373    | 0             | 0             | 17.2248167     | 17.111307      | 23.1301605     | 3.365E-39 | 7.714241  | up        | PREDICTED: thylakoid lumenal 16.5 kDa protein, chloroplastic [Sesamum indicum]                         |
| c26098.graph_c0 | 12.8006086    | 18.9150582    | 14.2952153    | 5.05403811     | 2.37961802     | 2.62328075     | 5.46E-17  | -3.195876 | down      | PREDICTED: UDP-glycosyltransferase 73C3 isoform X2 [Vitis vinifera]                                    |
| c26098.graph_c1 | 13.0720641    | 12.9330008    | 13.6728883    | 4.13097352     | 3.70869961     | 4.17411748     | 1.321E-21 | -2.740454 | down      | PREDICTED: UDP-glycosyltransferase 73C3-like [Sesamum indicum]                                         |
| c26103.graph_c0 | 2.67710326    | 1.67486499    | 2.04260906    | 10.4818691     | 11.2267429     | 11.2811972     | 4.725E-06 | 1.349762  | up        | hypothetical protein MIMGU_mgv1a009994mg [Erythranthe guttata]                                         |
| c26107.graph_c0 | 0             | 0             | 0             | 7.61102078     | 5.44085489     | 6.60706392     | 8.773E-19 | Inf       | up        | PREDICTED: LOW QUALITY PROTEIN: anthranilate synthase alpha subunit 1, chloroplastic [Sesamum indicum] |
| c26115.graph_c0 | 1.88605357    | 1.61823615    | 1.21182676    | 25.5048335     | 32.0155441     | 36.2221294     | 1.814E-30 | 3.294555  | up        | PREDICTED: macrophage migration inhibitory factor homolog isoform X2 [Sesamum indicum]                 |
| c26117.graph_c0 | 12.9357711    | 14.4314026    | 15.1637089    | 12.9634491     | 14.5523759     | 14.4488536     | 1.168E-07 | -1.040205 | down      | PREDICTED: uncharacterized protein LOC105176303 [Sesamum indicum]                                      |
| c26118.graph_c0 | 3.40203987    | 2.12840406    | 1.40520726    | 0              | 0              | 0              | 1.336E-11 | -Inf      | down      | hypothetical protein AALP_AAAs67754U000100, partial [Arabis alpina]                                    |
| c26120.graph_c0 | 5.39038939    | 6.62210229    | 6.8219113     | 0.11286314     | 0.07970988     | 0.30127484     | 9.276E-51 | -6.278856 | down      | PREDICTED: cytochrome P450 70C1-like [Sesamum indicum]                                                 |
| c26125.graph_c0 | 0             | 0             | 0.05845085    | 3.39425156     | 3.46262025     | 4.39977514     | 1.09E-15  | 6.5372    | up        | PREDICTED: cytochrome P450 90B1 [Sesamum indicum]                                                      |
| c26126.graph_c0 | 47.4308217    | 49.2774948    | 47.6055357    | 51.2857356     | 46.7295483     | 43.3827475     | 5.134E-13 | -1.044327 | down      | PREDICTED: transcription factor DFLH104 [Sesamum indicum]                                              |
| c26131.graph_c0 | 0.73867046    | 1.30484139    | 1.11673033    | 0.52039107     | 0.76332633     | 0.49865937     | 0.0002216 | -1.849966 | down      | hypothetical protein L484_013769 [Morus notabilis]                                                     |
| c26134.graph_c0 | 0.12996492    | 0.28620913    | 0.46762818    | 18.0556096     | 22.1719299     | 23.6085892     | 3.796E-86 | 5.142374  | up        | PREDICTED: probable methyltransferase PMT2 [Sesamum indicum]                                           |
| c26136.graph_c0 | 1.19146389    | 0.62225581    | 0.73225483    | 71.3475263     | 71.640537      | 71.1706952     | 6.49E-129 | 5.380192  | up        | PREDICTED: uncharacterized protein LOC105162013 [Sesamum indicum]                                      |
| c26138.graph_c0 | 0             | 0.09086078    | 0.07776193    | 4.96163946     | 5.90590492     | 6.2006137      | 1.567E-24 | 5.631502  | up        | PREDICTED: glycerol-3-phosphate 2-O-acyltransferase 6-like [Sesamum indicum]                           |
| c26141.graph_c0 | 2.42333751    | 2.89027214    | 2.84905617    | 10.5451728     | 11.3222958     | 13.4405584     | 0.0002862 | 1.091746  | up        | PREDICTED: short-chain dehydrogenase/reductase 2b-like [Sesamum indicum]                               |
| c26142.graph_c0 | 0.07748707    | 0.19391165    | 0             | 9.81559459     | 8.81030807     | 8.54330016     | 1.576E-28 | 5.644814  | up        | PREDICTED: uncharacterized protein LOC105156886 [Sesamum indicum]                                      |
| c26146.graph_c0 | 0.90827874    | 1.03041335    | 1.01155093    | 4.57431874     | 6.08696843     | 3.8220183      | 0.0061416 | 1.274965  | up        | PREDICTED: uncharacterized protein LOC100267130 [Vitis vinifera]                                       |

| #ID             | 0 h-1<br>FPKM | 0 h-2<br>FPKM | 0 h-3<br>FPKM | 48 h-1<br>FPKM | 48 h-2<br>FPKM | 48 h-3<br>FPKM | FDR       | log2FC    | regulated | nr_annotation                                                                                 |
|-----------------|---------------|---------------|---------------|----------------|----------------|----------------|-----------|-----------|-----------|-----------------------------------------------------------------------------------------------|
| c26148.graph_c0 | 0.97225551    | 0.6193276     | 0             | 3.90853175     | 2.67414748     | 3.47778805     | 0.0074292 | 1.665581  | up        | PREDICTED: protein CHUP1, chloroplastic isoform X1 [Sesamum indicum]                          |
| c26155.graph_c0 | 60.6819133    | 63.1452779    | 53.3829576    | 15.6486224     | 8.46910264     | 10.5439365     | 1.508E-97 | -3.359324 | down      | hypothetical protein MIMGU_mgv1a001787mg [Erythranthe guttata]                                |
| c26159.graph_c0 | 6.53295605    | 2.61579913    | 4.4773905     | 0              | 0              | 0              | 8.174E-11 | -Inf      | down      | metallothionein type 2a-FL [Elaeis guineensis]                                                |
| c26161.graph_c0 | 9.63539728    | 10.0232828    | 12.381867     | 0.3481081      | 0.18438916     | 0.46461674     | 1.72E-23  | -6.023067 | down      | hypothetical protein MIMGU_mgv1a020481mg, partial [Erythranthe guttata]                       |
| c26161.graph_c1 | 22.6554834    | 22.6515206    | 24.1526609    | 1.66777464     | 1.79278743     | 1.61491489     | 1.03E-153 | -4.793299 | down      | PREDICTED: beta-galactosidase 15-like [Sesamum indicum]                                       |
| c26162.graph_c1 | 0             | 0             | 0.33808626    | 7.75614063     | 8.47346209     | 10.1363832     | 2.713E-10 | 5.232243  | up        | hypothetical protein MIMGU_mgv1a0223741mg, partial [Erythranthe guttata]                      |
| c26163.graph_c0 | 0.1018095     | 0.10191145    | 0.13082924    | 10.1297039     | 23.1018738     | 26.0385656     | 5.958E-11 | 6.434725  | up        | PREDICTED: hyoscyamine 6-dioxygenase-like [Sesamum indicum]                                   |
| c26166.graph_c0 | 5.00892175    | 4.23445976    | 4.38125785    | 38.0215276     | 43.2780574     | 42.4573661     | 2.642E-45 | 2.164335  | up        | PREDICTED: kinesin-13A [Sesamum indicum]                                                      |
| c26171.graph_c0 | 1.54884731    | 2.08707456    | 1.07171622    | 1.15249548     | 1.16278973     | 1.31847885     | 0.0030669 | -1.387452 | down      | PREDICTED: peroxidase 11 [Sesamum indicum]                                                    |
| c26174.graph_c0 | 0.70239315    | 0.31248733    | 0.75216917    | 5.53621772     | 6.93130616     | 6.36553606     | 3.068E-09 | 2.389332  | up        | hypothetical protein L484_002404 [Morus notabilis]                                            |
| c26175.graph_c0 | 4.80588221    | 2.61151991    | 2.8231995     | 0              | 0              | 0              | 6.846E-14 | -Inf      | down      | PREDICTED: protein translation factor SUI1 homolog 2-like [Tarenaya hassleriana]              |
| c26177.graph_c0 | 27.6929072    | 30.0556372    | 25.9020399    | 22.2063553     | 27.0274133     | 27.4077581     | 4.246E-12 | -1.146414 | down      | PREDICTED: growth-regulating factor 4-like isoform X1 [Sesamum indicum]                       |
| c26178.graph_c1 | 0.09150038    | 0.045796      | 0.17637241    | 4.80487862     | 4.37577417     | 2.92524091     | 1.281E-11 | 4.247222  | up        | PREDICTED: U-box domain-containing protein 4-like [Nicotiana sylvestris]                      |
| c26182.graph_c0 | 0.16356285    | 0.16372664    | 0.10509237    | 1.77054605     | 4.03071413     | 4.62570489     | 2.442E-05 | 3.564888  | up        | PREDICTED: agmatine coumaroyltransferase-2-like [Sesamum indicum]                             |
| c26184.graph_c0 | 8.58670255    | 8.47338168    | 6.96488294    | 40.8996426     | 62.7635005     | 74.3320566     | 2.281E-06 | 1.865289  | up        | hypothetical protein MIMGU_mgv1a010851mg [Erythranthe guttata]                                |
| c26185.graph_c0 | 0             | 0             | 0             | 4.91024136     | 6.2021525      | 5.88148512     | 8.52E-14  | Inf       | up        | PREDICTED: probable receptor-like serine/threonine-protein kinase At4g34500 [Sesamum indicum] |
| c26186.graph_c0 | 2.92503333    | 1.44074336    | 1.55124404    | 11.9338109     | 10.5580113     | 12.0648986     | 1.056E-06 | 1.534612  | up        | PREDICTED: rop guanine nucleotide exchange factor 14 [Sesamum indicum]                        |
| c26189.graph_c0 | 0.22273528    | 0.22295831    | 0.28622365    | 6.89466172     | 8.73878376     | 6.53651374     | 2.026E-16 | 3.897998  | up        | PREDICTED: calcium-dependent protein kinase 13 [Sesamum indicum]                              |
| c26189.graph_c1 | 0.74588258    | 0.44797768    | 0.28754659    | 8.17715259     | 10.1914137     | 10.577687      | 2.45E-11  | 3.274381  | up        | PREDICTED: calcium-dependent protein kinase 13 [Sesamum indicum]                              |
| c26190.graph_c0 | 1.44332529    | 1.6098872     | 1.11283809    | 9.23181577     | 8.41159582     | 9.29614771     | 7.053E-07 | 1.679638  | up        | PREDICTED: RING-H2 finger protein ATL65 [Sesamum indicum]                                     |
| c26199.graph_c0 | 3.26428577    | 2.33396747    | 3.14605234    | 36.0872756     | 33.4513311     | 41.1253183     | 2.12E-43  | 2.64326   | up        | hypothetical protein MIMGU_mgv1a007643mg [Erythranthe guttata]                                |



| #ID             | 0 h-1<br>FPKM | 0 h-2<br>FPKM | 0 h-3<br>FPKM | 48 h-1<br>FPKM | 48 h-2<br>FPKM | 48 h-3<br>FPKM | FDR       | log2FC    | regulated | nr_annotation                                                                            |
|-----------------|---------------|---------------|---------------|----------------|----------------|----------------|-----------|-----------|-----------|------------------------------------------------------------------------------------------|
| c26203.graph_c0 | 2.11657411    | 1.78575599    | 1.94277252    | 0.4456974      | 0.66397831     | 0.57008212     | 1.715E-17 | -2.822349 | down      | PREDICTED: receptor-like protein kinase isoform X1 [Sesamum indicum]                     |
| c26206.graph_c0 | 1.59242128    | 1.34232914    | 0.96931155    | 13.8982959     | 12.0242401     | 11.1299581     | 1.114E-07 | 2.237107  | up        | hypothetical protein MIMGU_mgv1a006425mg [Erythranthe guttata]                           |
| c26208.graph_c0 | 2.09529116    | 2.85244942    | 2.69253209    | 0.6949148      | 0.24539265     | 0.20611034     | 1.134E-11 | -3.731882 | down      | -                                                                                        |
| c26211.graph_c0 | 4.0661284     | 4.92708423    | 4.05635557    | 2.51375155     | 1.93199124     | 1.88586281     | 3.816E-08 | -2.054472 | down      | hypothetical protein MIMGU_mgv1a013710mg [Erythranthe guttata]                           |
| c26213.graph_c0 | 17.5979997    | 17.4408633    | 14.8517377    | 10.0362632     | 11.10929       | 9.1591863      | 1.213E-24 | -1.735432 | down      | PREDICTED: myb-related protein 3R-1-like isoform X1 [Sesamum indicum]                    |
| c26214.graph_c0 | 0             | 0             | 0             | 7.57575648     | 6.75839611     | 11.086945      | 1.053E-15 | Inf       | up        | hypothetical protein MIMGU_mgv1a024317mg, partial [Erythranthe guttata]                  |
| c26216.graph_c0 | 0             | 0             | 0.13533102    | 4.26892176     | 13.8755607     | 15.1938436     | 1.516E-06 | 6.876897  | up        | PREDICTED: blue copper protein [Sesamum indicum]                                         |
| c26221.graph_c0 | 29.8270016    | 31.4896663    | 27.8483253    | 23.6144041     | 24.3343269     | 23.8772213     | 3.965E-06 | -1.328876 | down      | putative phosphoprotein phosphatase [Arabidopsis thaliana]                               |
| c26223.graph_c0 | 8.71151389    | 6.51901224    | 7.93406542    | 51.2704324     | 56.2133482     | 57.9611282     | 1.861E-19 | 1.816956  | up        | PREDICTED: UPF0587 protein C1orf123 homolog [Sesamum indicum]                            |
| c26227.graph_c0 | 0             | 0.05032113    | 0.06459996    | 2.13038588     | 2.99282645     | 4.32692342     | 3.152E-09 | 5.322306  | up        | PREDICTED: probable peccunesterase 55 [Sesamum indicum]                                  |
| c26228.graph_c0 | 8.39223796    | 7.03591636    | 6.50176098    | 69.1367094     | 71.526969      | 69.6882938     | 3.491E-50 | 2.24607   | up        | hypothetical protein MIMGU_mgv1a005139mg [Erythranthe guttata]                           |
| c26229.graph_c0 | 4.18597011    | 3.60672148    | 4.0173304     | 16.027607      | 22.0989549     | 23.1799905     | 5.516E-10 | 1.352324  | up        | PREDICTED: uncharacterized protein LOC105163825 [Sesamum indicum]                        |
| c26231.graph_c0 | 0.67543264    | 0.72118291    | 0.6365023     | 3.56758157     | 5.31755617     | 4.79853072     | 0.0001241 | 1.72759   | up        | PREDICTED: alpha-ketoglutarate-dependent dioxygenase alkB isoform X1 [Sesamum indicum]   |
| c26233.graph_c0 | 0             | 0.07126464    | 0             | 9.67422346     | 10.9087503     | 10.3588589     | 1.709E-40 | 7.754527  | up        | PREDICTED: uncharacterized protein LOC105176469 [Sesamum indicum]                        |
| c26234.graph_c0 | 0             | 0             | 0.04671307    | 1.97587117     | 2.44797488     | 2.29449335     | 3.049E-13 | 6.114727  | up        | PREDICTED: glucan endo-1,3-beta-glucosidase 12 [Sesamum indicum]                         |
| c26239.graph_c0 | 2.37674512    | 2.73599383    | 3.35963274    | 0              | 0              | 0              | 2.516E-19 | -Inf      | down      | -                                                                                        |
| c26246.graph_c0 | 2.71421837    | 3.23444791    | 2.6574309     | 0.35721643     | 0.50456999     | 0.31784903     | 1.59E-11  | -3.887102 | down      | hypothetical protein MIMGU_mgv1a027137mg [Erythranthe guttata]                           |
| c26248.graph_c0 | 4.22897175    | 4.17002424    | 3.56885716    | 36.8666705     | 36.653283      | 49.3090944     | 6.77E-18  | 2.341455  | up        | PREDICTED: photosystem II reaction center W protein, chloroplastic [Sesamum indicum]     |
| c26252.graph_c0 | 2.32820571    | 2.19543346    | 2.55823702    | 1.11907563     | 1.38311242     | 1.49362015     | 3.193E-06 | -1.848839 | down      | -                                                                                        |
| c26257.graph_c0 | 4.5352181     | 4.580293      | 4.63112677    | 19.0627579     | 21.6569177     | 19.9161574     | 7.806E-08 | 1.121664  | up        | PREDICTED: mitochondrial outer membrane import complex protein METAXIN [Sesamum indicum] |
| c26259.graph_c0 | 0.35447275    | 0.86172441    | 0.52058459    | 10.1701178     | 13.8381736     | 15.9400684     | 7.825E-19 | 3.499914  | up        | putative cyclin-dependent kinase B1-2 [Oryza sativa Japonica Group]                      |
| c26261.graph_c0 | 91.2087954    | 97.6281411    | 86.1395797    | 66.6605856     | 85.2094702     | 103.198751     | 3.349E-15 | -1.130846 | down      | PREDICTED: beta-amylase 1, chloroplastic [Sesamum indicum]                               |

| #ID             | 0 h-1<br>FPKM | 0 h-2<br>FPKM | 0 h-3<br>FPKM | 48 h-1<br>FPKM | 48 h-2<br>FPKM | 48 h-3<br>FPKM | FDR       | log2FC    | regulated | nr_annotation                                                                                   |
|-----------------|---------------|---------------|---------------|----------------|----------------|----------------|-----------|-----------|-----------|-------------------------------------------------------------------------------------------------|
| c26269.graph_c0 | 0.25668889    | 0.29977025    | 0.16492769    | 1.93124149     | 1.50312209     | 0.98194689     | 0.006519  | 1.609825  | up        | PREDICTED: phospholipase A1-Igama3, chloroplastic [Sesamum indicum]                             |
| c26272.graph_c0 | 0.20855303    | 0.13917457    | 0.08933297    | 1.8572823      | 1.22124748     | 1.25369551     | 6.278E-05 | 2.307252  | up        | PREDICTED: zinc finger protein WIPZ-like [Sesamum indicum]                                      |
| c26274.graph_c0 | 14.6624301    | 13.7049104    | 13.2858868    | 13.4791237     | 11.8333306     | 11.6340908     | 1.446E-12 | -1.18687  | down      | PREDICTED: protein FIZZY-RELATED 2-like [Sesamum indicum]                                       |
| c26278.graph_c0 | 119.257931    | 119.064571    | 113.767239    | 694.808321     | 721.223913     | 727.60799      | 3.303E-29 | 1.588352  | up        | PREDICTED: 60S acidic ribosomal protein P2A-like [Nicotiana tomentosiformis]                    |
| c26279.graph_c0 | 93.3152559    | 90.7774661    | 100.535586    | 24.0889117     | 12.2870612     | 12.3048006     | 1.43E-116 | -3.551969 | down      | hypothetical protein MIMGU_mgv1a015010mg [Erythranthe guttata]                                  |
| c26282.graph_c0 | 0.33015285    | 0.39658014    | 0.67881517    | 9.24641353     | 9.34434752     | 12.2869771     | 4.808E-14 | 3.429978  | up        | PREDICTED: inorganic pyrophosphatase 3 [Sesamum indicum]                                        |
| c26284.graph_c0 | 288.192432    | 294.360382    | 271.715883    | 73.9508716     | 61.5271172     | 66.1220216     | 2.819E-76 | -3.096838 | down      | PREDICTED: 18.2 kDa class I heat shock protein-like [Sesamum indicum]                           |
| c26286.graph_c0 | 0.1795195     | 0.14974938    | 0.07689656    | 3.66603578     | 4.38013576     | 6.37687454     | 4.586E-12 | 4.134085  | up        | PREDICTED: mini-chromosome maintenance complex-binding protein isoform X1 [Sesamum indicum]     |
| c26288.graph_c0 | 1.54517531    | 1.66883225    | 1.30632332    | 0.07492191     | 0.23811204     | 0.13333013     | 6.493E-15 | -4.3714   | down      | hypothetical protein MIMGU_mgv1a008148mg [Erythranthe guttata]                                  |
| c26289.graph_c0 | 0             | 0             | 0             | 1.86976688     | 1.10691278     | 2.10410044     | 1.082E-08 | Inf       | up        | PREDICTED: F-box/kelch-repeat protein SKIP25-like [Sesamum indicum]                             |
| c26290.graph_c0 | 0.2538172     | 0             | 0             | 1.11070656     | 1.7959531      | 1.76853688     | 9.026E-07 | 3.198638  | up        | PREDICTED: exopolysaccharonase-like [Sesamum indicum]                                           |
| c26291.graph_c0 | 16.7912953    | 15.6724262    | 15.5999343    | 5.12157153     | 4.87204279     | 5.76618163     | 4.314E-17 | -2.625969 | down      | PREDICTED: uncharacterized protein LOC105169169 isoform X2 [Sesamum indicum]                    |
| c26292.graph_c0 | 0.41129652    | 0.09149075    | 0.11745162    | 2.14717469     | 2.18546843     | 2.77216061     | 1.243E-05 | 2.507811  | up        | PREDICTED: putative kinase-like protein TMKL1 [Sesamum indicum]                                 |
| c26293.graph_c0 | 0.73942009    | 0.41120028    | 0.52788005    | 4.54134677     | 5.45247373     | 5.65720827     | 3.155E-05 | 2.201758  | up        | -                                                                                               |
| c26293.graph_c1 | 3.13299168    | 2.75099026    | 4.16728215    | 32.3571246     | 43.4515564     | 34.5133646     | 5.475E-25 | 2.431073  | up        | -                                                                                               |
| c26294.graph_c1 | 1.82808486    | 1.74673743    | 2.02882123    | 14.8511498     | 10.461629      | 9.80867415     | 5.715E-05 | 1.636846  | up        | PREDICTED: probable BOI-related E3 ubiquitin-protein ligase 2 [Sesamum indicum]                 |
| c26296.graph_c0 | 3.88331017    | 2.8120161     | 2.65436559    | 0.07611827     | 0              | 0.33864789     | 2.916E-18 | -5.517334 | down      | -                                                                                               |
| c26297.graph_c0 | 0.0200172     | 0             | 0             | 7.8928124      | 8.06843525     | 9.07408011     | 1.492E-59 | 9.291058  | up        | O-Glycosyl hydrolases family 17 protein [Theobroma cacao]                                       |
| c26298.graph_c0 | 2.37951036    | 2.54068595    | 1.90260934    | 14.8579743     | 16.7723679     | 17.4251002     | 3.153E-10 | 1.828549  | up        | hypothetical protein MIMGU_mgv1a013638mg [Erythranthe guttata]                                  |
| c26299.graph_c0 | 0.80123465    | 0.26734566    | 0.51480913    | 5.2900723      | 6.64683018     | 6.02067672     | 1.652E-05 | 2.484507  | up        | PREDICTED: cytochrome b561 and DOMON domain-containing protein At3g25290-like [Sesamum indicum] |
| c26299.graph_c1 | 0.53625235    | 0.53678933    | 0             | 3.85343902     | 3.03552027     | 4.13210367     | 0.0001028 | 2.361564  | up        | PREDICTED: cytochrome b561 and DOMON domain-containing protein At3g25290-like [Sesamum indicum] |
| c26306.graph_c0 | 96.3485699    | 94.7159539    | 90.9473592    | 18.6984932     | 9.92780774     | 7.78790956     | 1.47E-148 | -3.954728 | down      | PREDICTED: uncharacterized protein LOC105172717 [Sesamum indicum]                               |

| #ID             | 0 h-1<br>FPKM | 0 h-2<br>FPKM | 0 h-3<br>FPKM | 48 h-1<br>FPKM | 48 h-2<br>FPKM | 48 h-3<br>FPKM | FDR       | log2FC    | regulated | nr_annotation                                                                                           |
|-----------------|---------------|---------------|---------------|----------------|----------------|----------------|-----------|-----------|-----------|---------------------------------------------------------------------------------------------------------|
| c26309.graph_c0 | 0.03435869    | 0.03439309    | 0.04415228    | 1.36109902     | 0.67066017     | 0.76045671     | 0.0003631 | 3.62157   | up        | PREDICTED: ankyrin-3-like [Sesamum indicum]                                                             |
| c26310.graph_c0 | 0.35862941    | 0.40386208    | 0.34563974    | 13.5461048     | 5.99394026     | 5.40191056     | 0.0020867 | 3.493885  | up        | PREDICTED: uncharacterized protein LOC105176355 [Sesamum indicum]                                       |
| c26314.graph_c0 | 2.42770198    | 2.36618209    | 2.70920722    | 35.1963508     | 36.2886401     | 38.9635803     | 3.542E-33 | 2.859867  | up        | PREDICTED: galactokinase [Sesamum indicum]                                                              |
| c26315.graph_c0 | 2.53734641    | 2.96320171    | 2.53601491    | 1.03891956     | 3.02667558     | 2.1955079      | 0.0055544 | -1.392426 | down      | PREDICTED: cyclin-dependent protein kinase inhibitor SMR3-like [Sesamum indicum]                        |
| c26316.graph_c0 | 0.47401167    | 0.91247369    | 0.98396915    | 91.2011244     | 112.381219     | 144.815019     | 9.088E-40 | 6.171402  | up        | PREDICTED: uncharacterized protein LOC105167296 [Sesamum indicum]                                       |
| c26318.graph_c0 | 1.0357385     | 0.69118376    | 0.51759749    | 3.7637489      | 4.21186857     | 4.43383587     | 0.0034159 | 1.452821  | up        | PREDICTED: alpha-ketoglutarate-dependent dioxygenase alkB homolog 2 [Sesamum indicum]                   |
| c26323.graph_c0 | 0.31135348    | 0.13851789    | 0.3111901     | 1.08361452     | 1.418066       | 2.12689783     | 0.0026413 | 1.576642  | up        | PREDICTED: putative glycosyltransferase 3 [Sesamum indicum]                                             |
| c26325.graph_c0 | 272.386606    | 270.484086    | 285.607093    | 48.8764066     | 49.9137181     | 45.5170058     | 1.19E-111 | -3.538993 | down      | PREDICTED: uncharacterized protein LOC105175521 [Sesamum indicum]                                       |
| c26326.graph_c0 | 0             | 0             | 0             | 1.6427262      | 2.40322892     | 2.22733393     | 1.191E-11 | Inf       | up        | PREDICTED: MLP-like protein 423 [Cucumis melo]                                                          |
| c26328.graph_c0 | 0.30482649    | 0.39231222    | 0.55959158    | 23.2283256     | 19.3800744     | 26.1657256     | 4.087E-41 | 4.751839  | up        | PREDICTED: mitochondrial L-5-cyanoalanine synthase/cysteine synthase 1, mitochondrial [Sesamum indicum] |
| c26329.graph_c0 | 11.5352725    | 9.4579508     | 11.9182166    | 7.20930219     | 8.08996707     | 7.74526947     | 8.345E-10 | -1.534572 | down      | PREDICTED: septum-promoting GTP-binding protein 1 [Sesamum indicum]                                     |
| c26332.graph_c0 | 21.4378022    | 22.5129576    | 20.8510232    | 87.1360933     | 101.305601     | 123.750014     | 9.48E-10  | 1.247081  | up        | PREDICTED: plastidic ATP/ADP-transporter-like [Sesamum indicum]                                         |
| c26333.graph_c0 | 0.06482693    | 0.03244592    | 0             | 122.909514     | 135.838673     | 151.876935     | 7.75E-269 | 11.04143  | up        | 4-coumarate coenzyme A ligase [Paulownia fortunei]                                                      |
| c26334.graph_c0 | 5.24746078    | 4.54205384    | 4.20458032    | 47.6889786     | 47.4177498     | 49.4676394     | 2.233E-47 | 2.353145  | up        | PREDICTED: aspartate aminotransferase, chloroplastic [Nicotiana sylvestris]                             |
| c26336.graph_c0 | 26.376128     | 26.8809132    | 27.3989322    | 6.94268842     | 6.78089271     | 7.47334379     | 5.959E-86 | -2.945999 | down      | PREDICTED: uncharacterized protein LOC104091376 [Nicotiana tomentosiformis]                             |
| c26336.graph_c1 | 13.9967733    | 13.7413507    | 15.2192682    | 11.9028374     | 7.09290726     | 14.3420782     | 0.0011272 | -1.38083  | down      | -                                                                                                       |
| c26338.graph_c0 | 58.6710932    | 52.3582094    | 59.3021816    | 6.94767515     | 6.75249484     | 6.6924399      | 1.54E-120 | -4.079568 | down      | PREDICTED: uncharacterized protein LOC105158260 [Sesamum indicum]                                       |
| c26341.graph_c0 | 0.05422336    | 0             | 0             | 1.89825566     | 2.96353724     | 1.24456793     | 3.878E-06 | 5.815542  | up        | PREDICTED: transcription factor JUNGBRUNNEN 1-like [Sesamum indicum]                                    |
| c26342.graph_c0 | 1.49965636    | 1.47482194    | 1.58902696    | 0.65443323     | 0.87303519     | 0.88424966     | 4.261E-06 | -1.943595 | down      | PREDICTED: uncharacterized protein LOC105158927 [Sesamum indicum]                                       |
| c26343.graph_c0 | 0.12657926    | 0             | 0             | 2.7987138      | 3.58258497     | 2.3865171      | 5.397E-10 | 5.115968  | up        | 40S ribosomal protein S16 [Arabidopsis lyrata subsp. lyrata]                                            |
| c26346.graph_c0 | 0.03916184    | 0             | 0             | 6.53019822     | 5.31268228     | 5.77842873     | 8.242E-24 | 7.820953  | up        | PREDICTED: G2/mitotic-specific cyclin-2-like isoform X2 [Sesamum indicum]                               |
| c26349.graph_c0 | 2.01499525    | 1.85472457    | 1.36908091    | 9.11102688     | 11.9576649     | 11.7711965     | 2.823E-12 | 1.629497  | up        | PREDICTED: FACT complex subunit SPT16-like [Sesamum indicum]                                            |

| #ID             | 0 h-1<br>FPKM | 0 h-2<br>FPKM | 0 h-3<br>FPKM | 48 h-1<br>FPKM | 48 h-2<br>FPKM | 48 h-3<br>FPKM | FDR       | log2FC    | regulated | nr_annotation                                                                           |
|-----------------|---------------|---------------|---------------|----------------|----------------|----------------|-----------|-----------|-----------|-----------------------------------------------------------------------------------------|
| c26351.graph_c0 | 0.05827936    | 0             | 0             | 2.80981557     | 3.12833577     | 3.71042408     | 1.505E-23 | 6.37175   | up        | PREDICTED: kinesin-like protein KIF22 [Sesamum indicum]                                 |
| c26353.graph_c0 | 0.03478933    | 0.31341753    | 0.08941134    | 1.63456039     | 1.59580532     | 2.08181974     | 7.5E-06   | 2.585766  | up        | PREDICTED: cytochrome P450 711A1 [Sesamum indicum]                                      |
| c26358.graph_c0 | 60.6539279    | 63.2800719    | 57.594479     | 9.30368981     | 13.786673      | 15.1561648     | 4.71E-107 | -3.271165 | down      | PREDICTED: amidophosphoribosyltransferase, chloroplastic [Sesamum indicum]              |
| c26361.graph_c0 | 2.01996468    | 0.86656602    | 1.3596705     | 18.1661552     | 18.1183116     | 15.7698885     | 8.847E-11 | 2.601402  | up        | -                                                                                       |
| c26363.graph_c0 | 37.6848377    | 41.6316483    | 42.4045592    | 18.3482306     | 19.8188574     | 13.2850005     | 3.706E-19 | -2.259292 | down      | PREDICTED: protein phosphatase 2C 37-like [Sesamum indicum]                             |
| c26363.graph_c1 | 45.0172776    | 42.4791632    | 40.0152845    | 21.7138119     | 19.2532454     | 16.077178      | 1.995E-43 | -2.173033 | down      | PREDICTED: protein phosphatase 2C 37-like [Sesamum indicum]                             |
| c26364.graph_c0 | 0.77478315    | 1.24089436    | 0.73012648    | 167.548139     | 264.55664      | 399.700825     | 1.053E-14 | 7.217362  | up        | PREDICTED: protein YLS3-like [Sesamum indicum]                                          |
| c26365.graph_c0 | 1.43056541    | 1.56931277    | 1.43541085    | 6.31884326     | 6.29240534     | 7.24495257     | 7.25E-06  | 1.144365  | up        | PREDICTED: mechanosensitive ion channel protein 10-like [Sesamum indicum]               |
| c26367.graph_c0 | 11.021348     | 12.1570448    | 10.3815202    | 2.51375155     | 2.76744692     | 1.84200554     | 7.447E-33 | -3.251583 | down      | PREDICTED: dehydration-responsive protein RD22 [Sesamum indicum]                        |
| c26371.graph_c0 | 22.0280349    | 21.665498     | 20.2975812    | 7.82643188     | 5.99963016     | 4.54928926     | 1.004E-54 | -2.809088 | down      | PREDICTED: uncharacterized protein LOC105176235 [Sesamum indicum]                       |
| c26372.graph_c0 | 0             | 0             | 0             | 3.55862784     | 3.82705491     | 3.4063279      | 1.72E-14  | Inf       | up        | PREDICTED: protein trichome birefringence-like 38 [Sesamum indicum]                     |
| c26376.graph_c0 | 0.07711919    | 0.15439283    | 0.13213496    | 0.71047231     | 0.9533684      | 1.24327551     | 0.00035   | 1.971876  | up        | PREDICTED: putative serine/threonine-protein kinase-like protein CCR3 [Sesamum indicum] |
| c26381.graph_c0 | 77.2222938    | 80.5114303    | 71.957321     | 36.4948472     | 38.8726388     | 37.6321407     | 6.136E-47 | -2.040841 | down      | PREDICTED: protein SDE2 homolog [Sesamum indicum]                                       |
| c26382.graph_c0 | 5.93040678    | 6.67838834    | 5.71560563    | 0              | 0.18087162     | 0.1519178      | 7.204E-20 | -6.829487 | down      | PREDICTED: myb-related protein Myb4-like [Sesamum indicum]                              |
| c26384.graph_c0 | 17.7179454    | 18.4199344    | 15.7761563    | 12.1666261     | 15.3708105     | 14.3895603     | 1.223E-17 | -1.328183 | down      | PREDICTED: uncharacterized protein LOC105161020 isoform X2 [Sesamum indicum]            |
| c26387.graph_c0 | 3.18311774    | 3.71735601    | 3.18144736    | 29.7865533     | 34.9495154     | 34.9116953     | 6.502E-39 | 2.285265  | up        | PREDICTED: serine carboxypeptidase-like 45 [Sesamum indicum]                            |
| c26390.graph_c0 | 5.64961927    | 8.58041953    | 7.059709      | 3.48183023     | 3.91673633     | 3.64107961     | 6.536E-10 | -1.96716  | down      | PREDICTED: uncharacterized protein LOC105171007 isoform X3 [Sesamum indicum]            |
| c26391.graph_c0 | 4.59645726    | 4.53339727    | 6.51466496    | 5.10637664     | 5.14570458     | 4.32198307     | 0.0025598 | -1.122572 | down      | PREDICTED: E3 ubiquitin-protein ligase RNF5-like [Sesamum indicum]                      |
| c26393.graph_c0 | 34.7435714    | 37.8765216    | 33.7678471    | 13.8375387     | 16.4952955     | 18.6553921     | 1.924E-47 | -2.139788 | down      | PREDICTED: uncharacterized protein LOC105156254 [Sesamum indicum]                       |
| c26394.graph_c0 | 7.63524136    | 8.10409559    | 7.52785588    | 61.305666      | 59.8067765     | 62.9665331     | 8.783E-28 | 1.967002  | up        | hypothetical protein M569_01696, partial [Genlisea aurea]                               |
| c26398.graph_c0 | 0.07263453    | 0             | 0.15556375    | 8.49828991     | 13.5161764     | 11.9082319     | 1.492E-34 | 6.175337  | up        | PREDICTED: glycerophosphodiester phosphodiesterase GDPDL3-like [Sesamum indicum]        |

| #ID             | 0 h-1<br>FPKM | 0 h-2<br>FPKM | 0 h-3<br>FPKM | 48 h-1<br>FPKM | 48 h-2<br>FPKM | 48 h-3<br>FPKM | FDR       | log2FC    | regulated | nr_annotation                                                                          |
|-----------------|---------------|---------------|---------------|----------------|----------------|----------------|-----------|-----------|-----------|----------------------------------------------------------------------------------------|
| c26401.graph_c0 | 8.38353329    | 9.46781635    | 8.19497714    | 4.4888472      | 5.10505029     | 4.34657418     | 8.262E-10 | -1.919799 | down      | PREDICTED: LOW QUALITY PROTEIN: uncharacterized protein LOC105173575 [Sesamum indicum] |
| c26404.graph_c0 | 0             | 0             | 0             | 2.81089225     | 3.46255756     | 2.09395677     | 4.89E-12  | Inf       | up        | --                                                                                     |
| c26407.graph_c0 | 0             | 0             | 0             | 7.19374588     | 7.01122936     | 7.48911364     | 3.707E-18 | Inf       | up        | PREDICTED: EPIDERMAL PATTERNING FACTOR-like protein 4 [Sesamum indicum]                |
| c26409.graph_c0 | 0.36403001    | 0.36439453    | 0.24948959    | 2.05692491     | 2.74751362     | 2.62599568     | 3.626E-05 | 1.907066  | up        | PREDICTED: zinc finger CCCH domain-containing protein 31 isoform X1 [Sesamum indicum]  |
| c26413.graph_c0 | 0.1375434     | 0.51630423    | 0.22093589    | 19.9891258     | 19.8001147     | 23.3109202     | 1.745E-65 | 5.155956  | up        | PREDICTED: protein WVD2-like 1 isoform X2 [Sesamum indicum]                            |
| c26418.graph_c0 | 31.8411698    | 33.9911999    | 33.8818287    | 27.941718      | 29.9942291     | 32.4890363     | 2.594E-15 | -1.160876 | down      | PREDICTED: GATA transcription factor 15-like [Sesamum indicum]                         |
| c26420.graph_c0 | 0.05548801    | 0.44434855    | 0.07130428    | 1.84029013     | 5.90284731     | 9.14259161     | 0.0040237 | 3.856848  | up        | PREDICTED: 3-ketoacyl-CoA synthase 11 [Sesamum indicum]                                |
| c26422.graph_c0 | 285.842613    | 280.100125    | 294.371219    | 16.251961      | 16.258167      | 15.4412969     | 1.42E-212 | -5.182645 | down      | hypothetical protein MIMGU_mgv1a006265mg [Erythranthe guttata]                         |
| c26423.graph_c0 | 0.23799961    | 0.19059035    | 0.24467114    | 42.6242935     | 42.22854       | 34.9613669     | 2.301E-77 | 6.458462  | up        | hypothetical protein MIMGU_mgv1a008823mg [Erythranthe guttata]                         |
| c26427.graph_c0 | 0             | 0             | 0             | 1.08237644     | 2.86661647     | 2.80172231     | 6.164E-07 | Inf       | up        | hypothetical protein MIMGU_mgv1a010556mg [Erythranthe guttata]                         |
| c26429.graph_c0 | 7.54124191    | 7.95409766    | 6.79656388    | 4.21978051     | 4.81611837     | 4.89567699     | 4.845E-17 | -1.69689  | down      | PREDICTED: mitogen-activated protein kinase homolog NTF6 [Sesamum indicum]             |
| c26430.graph_c0 | 3.44928972    | 3.08090973    | 2.96634789    | 2.71327604     | 2.95207309     | 2.32725646     | 1.628E-05 | -1.264853 | down      | PREDICTED: uncharacterized protein LOC105156229 [Sesamum indicum]                      |
| c26431.graph_c0 | 4.48771975    | 4.43387309    | 4.34389686    | 4.18807339     | 3.69729661     | 3.86985031     | 0.0009868 | -1.189395 | down      | hypothetical protein MIMGU_mgv1a020357mg [Erythranthe guttata]                         |
| c26438.graph_c0 | 7.36137478    | 9.13083753    | 8.2257896     | 0.14742997     | 0.31236835     | 0.19677345     | 1.654E-36 | -6.262755 | down      | PREDICTED: probable trehalose-phosphate phosphatase J [Nicotiana tomentosiformis]      |
| c26442.graph_c0 | 90.8368424    | 90.4089556    | 79.0126698    | 35.6346933     | 30.3522706     | 29.848635      | 3.84E-63  | -2.453927 | down      | PREDICTED: uncharacterized protein At4g13200, chloroplastic-like [Sesamum indicum]     |
| c26443.graph_c0 | 0.80862639    | 1.4839662     | 1.21230308    | 6.33215468     | 6.83968242     | 6.62860371     | 0.0044585 | 1.477899  | up        | PREDICTED: myosin-6-like [Sesamum indicum]                                             |
| c26444.graph_c0 | 34.0354039    | 39.1989703    | 32.0796162    | 17.8309252     | 4.9336255      | 4.48444418     | 2.065E-31 | -2.938986 | down      | PREDICTED: receptor-like protein kinase FERONIA [Sesamum indicum]                      |
| c26444.graph_c1 | 19.6387413    | 20.0094495    | 17.0604297    | 8.86162749     | 2.10248048     | 2.5462053      | 3.983E-45 | -3.057269 | down      | PREDICTED: receptor-like protein kinase FERONIA [Sesamum indicum]                      |
| c26446.graph_c0 | 2.16052922    | 1.90316954    | 1.4437101     | 10.4298031     | 8.09705895     | 7.72183963     | 0.004961  | 1.244612  | up        | PREDICTED: uncharacterized protein LOC105170673 [Sesamum indicum]                      |
| c26447.graph_c0 | 122.9693      | 111.146755    | 119.45988     | 67.6377997     | 36.4600099     | 30.5526241     | 6.564E-44 | -2.395851 | down      | PREDICTED: uncharacterized protein LOC105156412 [Sesamum indicum]                      |

| #ID             | 0 h-1<br>FPKM | 0 h-2<br>FPKM | 0 h-3<br>FPKM | 48 h-1<br>FPKM | 48 h-2<br>FPKM | 48 h-3<br>FPKM | FDR       | log2FC    | regulated | nr_annotation                                                                                  |
|-----------------|---------------|---------------|---------------|----------------|----------------|----------------|-----------|-----------|-----------|------------------------------------------------------------------------------------------------|
| c26450.graph_c0 | 1.74992952    | 2.00192207    | 2.64136389    | 30.3749383     | 34.9708067     | 37.273728      | 5.167E-62 | 2.979964  | up        | PREDICTED: coatamer subunit alpha-1-like [Sesamum indicum]                                     |
| c26452.graph_c0 | 0             | 0.07097769    | 0             | 23.6145764     | 49.7913512     | 75.3878402     | 4.437E-12 | 10.01362  | up        | PREDICTED: subtilisin-like protease [Sesamum indicum]                                          |
| c26453.graph_c0 | 6.83268368    | 5.57294677    | 5.04052482    | 32.930679      | 41.9250189     | 46.9342934     | 9.702E-15 | 1.783265  | up        | PREDICTED: DAG protein, chloroplastic [Sesamum indicum]                                        |
| c26454.graph_c0 | 9.03314413    | 4.63702024    | 5.45672762    | 0              | 0              | 0              | 7.053E-18 | -Inf      | down      | hypothetical protein SNOG_05978 [Phaeosphaeria nodorum SN15]                                   |
| c26459.graph_c0 | 0.70506285    | 0.84692263    | 0.96643592    | 11.302168      | 11.6521541     | 12.0987461     | 3.347E-15 | 2.777912  | up        | hypothetical protein MIMGU_mgv1a021565mg [Erythranthe guttata]                                 |
| c26464.graph_c0 | 19.0647235    | 22.1372242    | 18.1292041    | 203.211625     | 215.557175     | 240.906315     | 1.323E-58 | 2.456616  | up        | PREDICTED: 60S ribosomal protein L12 [Sesamum indicum]                                         |
| c26468.graph_c0 | 2.01543682    | 1.21420901    | 1.82253356    | 0              | 0              | 0              | 2.664E-30 | -Inf      | down      | PREDICTED: uncharacterized protein LOC104812256 [Tarenaya hassleriana]                         |
| c26470.graph_c0 | 0             | 0             | 0             | 7.67220422     | 9.85001131     | 9.44061487     | 1.83E-43  | Inf       | up        | PREDICTED: tyrosine decarboxylase 1-like [Setaria italica]                                     |
| c26474.graph_c0 | 0.18175733    | 0.07277573    | 0.04671307    | 4.01872102     | 4.82499397     | 5.27435485     | 8.415E-16 | 4.539499  | up        | PREDICTED: acetylornithine acetylase [Sesamum indicum]                                         |
| c26475.graph_c0 | 6.21392652    | 3.52784561    | 4.05216141    | 0              | 0              | 0              | 3.286E-20 | -Inf      | down      | predicted protein [Hordeum vulgare subsp. vulgare]                                             |
| c26478.graph_c0 | 2.32096779    | 1.42395309    | 2.02042728    | 12.8293615     | 20.971295      | 23.9970757     | 4.431E-07 | 2.298567  | up        | PREDICTED: 21 kDa protein-like [Sesamum indicum]                                               |
| c26481.graph_c0 | 1.11494777    | 0.98476255    | 0.80065555    | 18.8212443     | 20.3335487     | 18.9960961     | 1.139E-83 | 3.310136  | up        | PREDICTED: LOW QUALITY PROTEIN: UDP-glucose:glycoprotein glucosyltransferase [Sesamum indicum] |
| c26482.graph_c0 | 2.62904921    | 2.6316818     | 1.68921616    | 0.30275645     | 0.72165094     | 1.07756348     | 7.378E-08 | -2.753854 | down      | -                                                                                              |
| c26483.graph_c0 | 4.86044051    | 6.25539537    | 5.71049919    | 5.62917749     | 5.15023585     | 3.98427932     | 0.0006174 | -1.20305  | down      | -                                                                                              |
| c26487.graph_c0 | 189.426176    | 201.646716    | 189.169362    | 63.7665889     | 72.3420144     | 69.9227347     | 2.874E-58 | -2.513097 | down      | hypothetical protein H632_c16p1 [Helicosporidium sp. ATCC 50920]                               |
| c26488.graph_c0 | 11.5626991    | 11.3112256    | 9.79311945    | 7.98923441     | 11.0924784     | 8.9936746      | 8.15E-07  | -1.238957 | down      | PREDICTED: mechanosensitive ion channel protein 2, chloroplastic-like [Sesamum indicum]        |
| c26489.graph_c0 | 5.62323625    | 6.12467401    | 4.90474942    | 58.3006665     | 81.4684737     | 90.6867342     | 7.57E-18  | 2.76822   | up        | PREDICTED: L-gulonolactone oxidase, partial [Sesamum indicum]                                  |
| c26490.graph_c0 | 2.19642595    | 2.5983754     | 3.25014496    | 59.3557316     | 60.9963927     | 66.2362075     | 1.326E-64 | 3.513343  | up        | PREDICTED: 50S ribosomal protein L21, chloroplastic [Sesamum indicum]                          |
| c26491.graph_c0 | 3.08618573    | 2.87172143    | 1.95500676    | 35.9604175     | 37.6714736     | 41.9742694     | 5.937E-46 | 2.854102  | up        | hypothetical protein MIMGU_mgv1a006583mg [Erythranthe guttata]                                 |
| c26496.graph_c0 | 317.258495    | 348.859207    | 361.694843    | 8.48969317     | 7.65776491     | 6.81509205     | 3.71E-265 | -6.499663 | down      | PREDICTED: methionine gamma-lyase [Sesamum indicum]                                            |
| c26497.graph_c0 | 0             | 0             | 0             | 1.12330557     | 1.23958963     | 1.832436       | 1.404E-11 | Inf       | up        | PREDICTED: uncharacterized protein LOC105170157 isoform X1 [Sesamum indicum]                   |
| c26498.graph_c0 | 1.85233419    | 1.66237636    | 0.82080095    | 6.76711976     | 9.84950407     | 8.37751996     | 0.0003354 | 1.511394  | up        | PREDICTED: uncharacterized protein LOC105161253 [Sesamum indicum]                              |
| c26502.graph_c0 | 34.216199     | 34.344556     | 31.5676095    | 10.680597      | 10.1527371     | 9.16962311     | 1.407E-72 | -2.753419 | down      | PREDICTED: uncharacterized protein LOC105166690 [Sesamum indicum]                              |

| #ID             | 0 h-1<br>FPKM | 0 h-2<br>FPKM | 0 h-3<br>FPKM | 48 h-1<br>FPKM | 48 h-2<br>FPKM | 48 h-3<br>FPKM | FDR       | log2FC    | regulated | nr_annotation                                                                   |
|-----------------|---------------|---------------|---------------|----------------|----------------|----------------|-----------|-----------|-----------|---------------------------------------------------------------------------------|
| c26507.graph_c0 | 62.246062     | 63.0164419    | 60.9004526    | 19.1421962     | 15.0149677     | 13.0462553     | 2.784E-71 | -2.990683 | down      | hypothetical protein MIMGU_mgv1a002702mg [Erythranthe guttata]                  |
| c26512.graph_c0 | 78.9197461    | 79.4784248    | 69.0262374    | 57.9176048     | 63.0870126     | 63.5935506     | 3.965E-21 | -1.318652 | down      | PREDICTED: PRA1 family protein F2-like [Nicotiana tomentosiformis]              |
| c26519.graph_c0 | 0.28693327    | 0.31594265    | 0.25810443    | 5.20753042     | 4.67663327     | 5.43334191     | 1.88E-13  | 3.138002  | up        | PREDICTED: uncharacterized protein LOC105156252 [Sesamum indicum]               |
| c26520.graph_c0 | 5.38868501    | 4.34157736    | 3.37788955    | 3.63249374     | 1.92409332     | 3.8786053      | 0.0012869 | -1.481942 | down      | -                                                                               |
| c26523.graph_c0 | 1.0424481     | 0.52174598    | 0.37210752    | 9.71041977     | 11.6435414     | 11.2513447     | 3.077E-13 | 3.061389  | up        | PREDICTED: epidermal growth factor receptor substrate 15-like [Sesamum indicum] |
| c26524.graph_c0 | 0             | 0             | 0             | 2.71268744     | 3.61881318     | 2.86072056     | 2.118E-11 | Inf       | up        | 60S ribosomal protein L17 [Drechslerella stenobrocha 248]                       |
| c26525.graph_c0 | 0.34799442    | 0.5515429     | 0.52171771    | 8.41562294     | 8.49079243     | 9.0808927      | 7.696E-21 | 3.17212   | up        | PREDICTED: probable receptor-like protein kinase At5g15080 [Sesamum indicum]    |
| c26527.graph_c0 | 17.0549249    | 18.6817699    | 18.8164362    | 13.6457524     | 12.2669656     | 10.0951296     | 3.55E-20  | -1.613847 | down      | PREDICTED: F-box/kelch-repeat protein SKIP25-like [Sesamum indicum]             |
| c26528.graph_c0 | 112.661632    | 130.003875    | 122.209472    | 84.570643      | 76.0177444     | 67.8394205     | 2.858E-27 | -1.690372 | down      | unnamed protein product [Coffea canephora]                                      |
| c26529.graph_c0 | 0             | 0             | 0.03575775    | 6.1012008      | 6.11043508     | 8.23445821     | 2.985E-50 | 8.107062  | up        | PREDICTED: protein STICHEL [Sesamum indicum]                                    |
| c26530.graph_c0 | 0             | 0.1307766     | 0.05596167    | 7.86348171     | 10.4555088     | 11.2449837     | 5.601E-30 | 6.281857  | up        | hypothetical protein MIMGU_mgv1a009832mg [Erythranthe guttata]                  |
| c26531.graph_c0 | 6.7972667     | 6.29055818    | 9.06437029    | 28.2384607     | 35.1722939     | 38.2678417     | 2.37E-05  | 1.172776  | up        | hypothetical protein MIMGU_mgv1a013949mg [Erythranthe guttata]                  |
| c26533.graph_c0 | 2.65958304    | 3.03496068    | 3.34931611    | 12.0058887     | 12.5111297     | 15.3483028     | 9.515E-05 | 1.118297  | up        | PREDICTED: 54S ribosomal protein L12, mitochondrial [Sesamum indicum]           |
| c26539.graph_c1 | 24.134704     | 23.6555614    | 25.1989157    | 27.5249005     | 17.3302804     | 16.0528816     | 4.922E-10 | -1.268822 | down      | PREDICTED: grpE protein homolog, mitochondrial isoform X2 [Sesamum indicum]     |
| c26540.graph_c0 | 0.73732778    | 0.54552712    | 0.6385295     | 10.336785      | 10.3717544     | 10.8400393     | 5.645E-40 | 3.020057  | up        | PREDICTED: chromosome-associated kinesin KIF4A [Sesamum indicum]                |
| c26542.graph_c0 | 2.87400532    | 2.40612049    | 2.75312064    | 15.2123616     | 16.1156525     | 19.2757612     | 2.454E-09 | 1.635096  | up        | PREDICTED: 50S ribosomal protein L21, mitochondrial [Sesamum indicum]           |
| c26546.graph_c0 | 11.765041     | 6.03440461    | 5.49765217    | 0              | 0              | 0              | 2.885E-13 | -Inf      | down      | heat shock protein 70-1 [Nicotiana tabacum]                                     |
| c26547.graph_c0 | 0             | 0             | 0.33361398    | 10.0452722     | 14.8224344     | 15.1098528     | 5.587E-17 | 5.847882  | up        | -                                                                               |
| c26548.graph_c0 | 0.12173276    | 0.12185466    | 0.26071903    | 6.50459317     | 9.3065777      | 10.7439228     | 1.713E-20 | 4.684701  | up        | PREDICTED: amino acid permease 6 [Sesamum indicum]                              |
| c26549.graph_c0 | 2.76018101    | 2.32669045    | 2.24017382    | 0.06691734     | 0.77979884     | 0.65496908     | 2.296E-10 | -3.328354 | down      | PREDICTED: uncharacterized protein LOC105160363 [Sesamum indicum]               |
| c26550.graph_c0 | 3.8962461     | 4.0290781     | 4.01374015    | 14.3875693     | 18.8873668     | 19.3217401     | 2.834E-08 | 1.116493  | up        | PREDICTED: glycoprotein 3-alpha-L-fucosyltransferase A [Sesamum indicum]        |
| c26551.graph_c0 | 1.50967329    | 0.86353428    | 1.10856568    | 6.15929922     | 9.89278844     | 11.6681771     | 0.0003425 | 1.967889  | up        | S-adenosylmethionine synthetase [Gentiana triflora]                             |

| #ID             | 0 h-1<br>FPKM | 0 h-2<br>FPKM | 0 h-3<br>FPKM | 48 h-1<br>FPKM | 48 h-2<br>FPKM | 48 h-3<br>FPKM | FDR       | log2FC    | regulated | nr_annotation                                                                                     |
|-----------------|---------------|---------------|---------------|----------------|----------------|----------------|-----------|-----------|-----------|---------------------------------------------------------------------------------------------------|
| c26554.graph_c0 | 16.216429     | 14.0597906    | 16.4084672    | 77.756668      | 84.4922998     | 86.2487602     | 4.068E-13 | 1.392381  | up        | hypothetical protein MIMGU_mgv1a016711mg<br>[Erythranthe guttata]                                 |
| c26555.graph_c0 | 3.04088308    | 1.88933466    | 2.56018786    | 33.617518      | 32.2365243     | 38.0784792     | 2.911E-19 | 2.776825  | up        | PREDICTED: cytochrome c oxidase subunit 6b-2-like<br>[Sesamum indicum]                            |
| c26558.graph_c0 | 1.42630536    | 1.00781195    | 1.83285886    | 0.15458889     | 0              | 0.06877613     | 9.192E-13 | -5.244669 | down      | -                                                                                                 |
| c26561.graph_c0 | 2.72465804    | 2.35547005    | 2.54639524    | 14.7185054     | 16.1968311     | 14.4162336     | 6.402E-07 | 1.553224  | up        | PREDICTED: vesicle-associated membrane protein 724<br>[Sesamum indicum]                           |
| c26569.graph_c0 | 0.3729222     | 0.07465913    | 0.57506375    | 22.6749768     | 24.530933      | 25.434061      | 9.727E-37 | 5.121348  | up        | PREDICTED: uncharacterized protein LOC105155725<br>[Sesamum indicum]                              |
| c26574.graph_c0 | 6.91418328    | 7.11335976    | 5.75879582    | 0.53081638     | 0.81226253     | 0.57727661     | 2.913E-26 | -4.386133 | down      | PREDICTED: zinc finger CCCH domain-containing protein<br>48-like [Sesamum indicum]                |
| c26576.graph_c0 | 1.62758065    | 2.50415677    | 2.40135826    | 8.49678959     | 15.737599      | 18.6786162     | 0.0008737 | 1.684379  | up        | PREDICTED: ATP-dependent zinc metalloprotease FTSH<br>7, chloroplastic [Sesamum indicum]          |
| c26578.graph_c0 | 0.63278934    | 0.63342298    | 0.5227453     | 14.5325298     | 11.3370529     | 13.2273692     | 6.076E-22 | 3.438102  | up        | PREDICTED: transcription repressor KAN1 [Sesamum<br>indicum]                                      |
| c26579.graph_c0 | 44.8314832    | 44.2409039    | 41.6829249    | 13.0338431     | 13.6307535     | 13.4559985     | 1.084E-75 | -2.721896 | down      | PREDICTED: uncharacterized protein LOC105161451<br>[Sesamum indicum]                              |
| c26580.graph_c0 | 2.70180332    | 2.66796135    | 1.9236337     | 0.739996       | 1.28280441     | 1.31688797     | 8.369E-08 | -2.150574 | down      | PREDICTED: transcription factor TCF2-like [Sesamum<br>indicum]                                    |
| c26585.graph_c0 | 0.03186086    | 0             | 0             | 7.86641678     | 5.53494635     | 5.61526278     | 2.957E-22 | 8.232175  | up        | PREDICTED: probable isoprenylcysteine alpha-carbonyl<br>methyltransferase ICME2 [Sesamum indicum] |
| c26586.graph_c0 | 1.90805198    | 1.90996261    | 2.29114055    | 28.3845018     | 24.117006      | 24.4102069     | 9.187E-32 | 2.637831  | up        | hypothetical protein NitaMp096 [Nicotiana tabacum]                                                |
| c26587.graph_c0 | 0.13548058    | 0.3390406     | 0.43524476    | 6.92715166     | 9.18962464     | 15.7147552     | 1.276E-06 | 4.094288  | up        | Selenoprotein H [Gossypium arboreum]                                                              |
| c26588.graph_c0 | 18.3667864    | 17.6398329    | 17.861009     | 124.96152      | 136.620695     | 157.476792     | 2.675E-30 | 1.939619  | up        | -                                                                                                 |
| c26591.graph_c0 | 20784.3207    | 19032.3289    | 20528.9155    | 3386.93157     | 2759.40044     | 3193.99188     | 4.937E-34 | -3.706491 | down      | -                                                                                                 |
| c26599.graph_c1 | 6.26271054    | 5.1676741     | 7.12341797    | 0.89662974     | 2.31272813     | 1.66500678     | 8.099E-20 | -2.961934 | down      | PREDICTED: uncharacterized protein LOC103430095<br>[Malus domestica]                              |
| c26601.graph_c0 | 0             | 0             | 0             | 2.21144954     | 1.87421011     | 3.34514865     | 1.504E-09 | Inf       | up        | PREDICTED: uncharacterized protein LOC105161958<br>[Sesamum indicum]                              |
| c26604.graph_c0 | 0.93702604    | 0.39081847    | 0.50171482    | 11.5099934     | 13.2603686     | 12.353837      | 3.05E-13  | 3.327533  | up        | -                                                                                                 |
| c26605.graph_c0 | 0.96542299    | 0.37581822    | 0.55138078    | 9.437635       | 9.73630137     | 9.80447038     | 2.171E-12 | 2.922002  | up        | hypothetical protein MIMGU_mgv1a010920mg<br>[Erythranthe guttata]                                 |
| c26607.graph_c0 | 14.4314151    | 14.445866     | 13.5996225    | 1.92041213     | 2.81692217     | 1.97165904     | 5.692E-19 | -3.684131 | down      | PREDICTED: heat stress transcription factor A-8 [Sesamum<br>indicum]                              |
| c26607.graph_c1 | 41.5186745    | 43.9383561    | 42.3772219    | 5.62802287     | 6.18303031     | 4.72957086     | 2.02E-112 | -3.96751  | down      | PREDICTED: heat stress transcription factor A-8 [Sesamum<br>indicum]                              |
| c26609.graph_c1 | 20.3570047    | 22.8790233    | 21.357922     | 19.04479       | 17.9496942     | 17.2045044     | 7.99E-18  | -1.269105 | down      | PREDICTED: homeobox-leucine zipper protein HDG5<br>isoform X2 [Sesamum indicum]                   |



| #ID             | 0 h-1<br>FPKM | 0 h-2<br>FPKM | 0 h-3<br>FPKM | 48 h-1<br>FPKM | 48 h-2<br>FPKM | 48 h-3<br>FPKM | FDR       | log2FC    | regulated | nr_annotation                                                                                           |
|-----------------|---------------|---------------|---------------|----------------|----------------|----------------|-----------|-----------|-----------|---------------------------------------------------------------------------------------------------------|
| c26610.graph_c0 | 0             | 0.06292394    | 0             | 4.57502021     | 5.27613174     | 8.0901215      | 1.479E-13 | 7.1438    | up        | PREDICTED: DNA primase small subunit [Sesamum indicum]                                                  |
| c26612.graph_c0 | 0             | 0             | 0             | 10.7144591     | 12.3495292     | 15.4063967     | 1.108E-23 | Inf       | up        | PREDICTED: gibberellin-regulated protein 9-like [Solanum tuberosum]                                     |
| c26616.graph_c0 | 62.770186     | 64.0623829    | 57.3402847    | 68.9326397     | 38.7991038     | 27.2562341     | 3.039E-08 | -1.449686 | down      | PREDICTED: uncharacterized protein LOC105165909 [Sesamum indicum]                                       |
| c26617.graph_c0 | 28.5772278    | 29.1004691    | 26.5279516    | 29.0332687     | 18.7811992     | 17.0123891     | 1.042E-14 | -1.384061 | down      | PREDICTED: probable F-box protein At5g04010 [Sesamum indicum]                                           |
| c26624.graph_c0 | 0.04105661    | 0.08219545    | 0             | 13.1627627     | 17.0297391     | 16.1210301     | 4.1E-51   | 7.546743  | up        | PREDICTED: vinorine synthase-like [Sesamum indicum]                                                     |
| c26625.graph_c0 | 0.22899539    | 0.45844938    | 0.58853628    | 5.06317167     | 5.5873088      | 4.88061135     | 9.467E-06 | 2.580032  | up        | PREDICTED: V-type proton ATPase subunit c&apos;&apos;2 [Sesamum indicum]                                |
| c26626.graph_c0 | 0             | 0             | 0.11462349    | 1.89003407     | 1.82815218     | 3.29036272     | 7.461E-07 | 4.879947  | up        | -                                                                                                       |
| c26627.graph_c0 | 70.4537045    | 71.0029247    | 72.3740179    | 68.5287837     | 65.9085554     | 63.241341      | 1.862E-15 | -1.129904 | down      | PREDICTED: protein MODIFIER OF SNC1 11-like [Sesamum indicum]                                           |
| c26630.graph_c0 | 32.3789992    | 30.748145     | 30.4127211    | 11.4602107     | 9.81775312     | 9.68184329     | 1.032E-56 | -2.608925 | down      | PREDICTED: annexin D5 [Sesamum indicum]                                                                 |
| c26632.graph_c0 | 0.98645955    | 0.70531953    | 0.09054568    | 4.67378167     | 4.12608747     | 3.81214426     | 0.0009457 | 1.823381  | up        | PREDICTED: ethylene-responsive transcription factor-like protein At4g13040 isoform X2 [Sesamum indicum] |
| c26634.graph_c0 | 1.45007138    | 1.6203052     | 2.16674318    | 13.0793963     | 14.5801028     | 13.0477933     | 2.316E-14 | 1.935654  | up        | PREDICTED: pentatricopeptide repeat-containing protein At3g59040 [Sesamum indicum]                      |
| c26636.graph_c0 | 56.2039248    | 60.248626     | 50.3582056    | 76.5236817     | 47.5791559     | 38.6178123     | 5.809E-05 | -1.040206 | down      | PREDICTED: ethylene-responsive transcription factor ERF008-like [Sesamum indicum]                       |
| c26638.graph_c0 | 0.47739881    | 0.47787686    | 0.24539055    | 13.8100631     | 17.984757      | 20.8193475     | 1.103E-19 | 4.436602  | up        | -                                                                                                       |
| c26639.graph_c0 | 3.9333911     | 3.82795953    | 4.49294515    | 0.60394941     | 0.63981116     | 0.62695564     | 3.174E-12 | -3.731592 | down      | PREDICTED: UDP-glucuronate 4-epimerase 3-like [Sesamum indicum]                                         |
| c26640.graph_c0 | 1.22171486    | 1.22293822    | 1.50956919    | 0.3463149      | 0.18343932     | 0.46222337     | 1.842E-08 | -3.011799 | down      | -                                                                                                       |
| c26644.graph_c0 | 0.04765713    | 0             | 0             | 4.69781991     | 5.72096054     | 6.71940007     | 4.321E-20 | 7.48936   | up        | PREDICTED: protein polybromo-1-like isoform X1 [Cucumis melo]                                           |
| c26648.graph_c0 | 0.16870275    | 0             | 0             | 9.63603833     | 11.1961059     | 17.0098862     | 1.548E-12 | 6.807266  | up        | -                                                                                                       |
| c26649.graph_c0 | 26.3751529    | 21.7601928    | 23.4466074    | 21.0809001     | 21.8624962     | 18.8070204     | 1.612E-12 | -1.229555 | down      | PREDICTED: ganglioside-induced differentiation-associated protein 2 [Sesamum indicum]                   |
| c26650.graph_c0 | 4.71048956    | 5.52987557    | 6.05316558    | 3.86248031     | 5.00647378     | 5.05413493     | 3.812E-08 | -1.25122  | down      | PREDICTED: uncharacterized protein LOC105161159 [Sesamum indicum]                                       |
| c26653.graph_c0 | 0             | 0.04438812    | 0             | 3.47244758     | 3.67863715     | 5.92507488     | 1.507E-13 | 7.191904  | up        | PREDICTED: basic leucine zipper 01-like [Sesamum indicum]                                               |
| c26655.graph_c0 | 0             | 0.44280995    | 0             | 13.6525002     | 18.1329277     | 16.6807158     | 1.578E-13 | 5.763735  | up        | BnaA05g08010D [Brassica napus]                                                                          |
| c26655.graph_c1 | 0.9964087     | 0.66493764    | 0.42680821    | 28.8937796     | 30.0074545     | 30.2991064     | 7.648E-58 | 4.405647  | up        | PREDICTED: uncharacterized protein LOC105174078 [Sesamum indicum]                                       |
| c26658.graph_c0 | 1.16106525    | 1.93704647    | 1.65779424    | 0.07923326     | 0              | 0.07050128     | 3.874E-19 | -5.988474 | down      | -                                                                                                       |

| #ID             | 0 h-1<br>FPKM | 0 h-2<br>FPKM | 0 h-3<br>FPKM | 48 h-1<br>FPKM | 48 h-2<br>FPKM | 48 h-3<br>FPKM | FDR       | log2FC    | regulated | nr_annotation                                                                                               |
|-----------------|---------------|---------------|---------------|----------------|----------------|----------------|-----------|-----------|-----------|-------------------------------------------------------------------------------------------------------------|
| c26663.graph_c0 | 0.35809017    | 0.39429362    | 0.27609603    | 21.0803558     | 12.6862995     | 10.9783772     | 7.373E-08 | 4.440517  | up        | PREDICTED: uncharacterized calcium-binding protein At1g02270 [Sesamum indicum]                              |
| c26665.graph_c0 | 3.49271871    | 3.45459452    | 2.08384513    | 21.9494491     | 23.6180067     | 26.0406504     | 3.907E-19 | 1.972657  | up        | PREDICTED: uncharacterized protein LOC105157763 [Sesamum indicum]                                           |
| c26666.graph_c0 | 22.505543     | 21.3951387    | 20.0821362    | 9.54466275     | 15.2096042     | 19.9473361     | 9.959E-20 | -1.54361  | down      | PREDICTED: potassium/sodium hyperpolarization-activated cyclic nucleotide-gated channel 4 [Sesamum indicum] |
| c26667.graph_c0 | 70.096248     | 73.1312179    | 67.1248351    | 52.5878642     | 35.8263843     | 56.3568425     | 3.159E-24 | -1.552383 | down      | hypothetical protein CARUB_v10021660mg, partial [Capsella rubella]                                          |
| c26670.graph_c0 | 1.28484957    | 1.45762098    | 1.68777329    | 6.31299856     | 8.66634736     | 10.3685408     | 1.614E-06 | 1.489482  | up        | hypothetical protein MIMGU_mgv1a011972mg [Erythranthe guttata]                                              |
| c26671.graph_c0 | 18.012511     | 10.3855956    | 10.9252848    | 0              | 0              | 0              | 3.463E-22 | -Inf      | down      | predicted protein [Hordeum vulgare subsp. vulgare]                                                          |
| c26672.graph_c0 | 1.08462259    | 0.82513859    | 0.50176187    | 11.9507319     | 13.6765668     | 13.4788237     | 5.247E-19 | 3.0062    | up        | PREDICTED: alpha/beta hydrolase domain-containing protein 17B-like [Sesamum indicum]                        |
| c26673.graph_c0 | 25.9940895    | 25.4979758    | 26.2535353    | 24.5881852     | 9.92716447     | 5.34489072     | 2.414E-10 | -1.95752  | down      | PREDICTED: uncharacterized protein LOC105177028 [Sesamum indicum]                                           |
| c26674.graph_c0 | 19.1689178    | 19.787741     | 19.1674117    | 84.7663552     | 84.2456585     | 89.1247633     | 9.521E-14 | 1.133316  | up        | PREDICTED: 50S ribosomal protein L5, chloroplastic [Sesamum indicum]                                        |
| c26676.graph_c0 | 1.04607464    | 0.4430132     | 0.93063276    | 10.0819121     | 11.622966      | 12.1369982     | 7.138E-17 | 2.784138  | up        | PREDICTED: probable receptor-like protein kinase At2g42960 [Sesamum indicum]                                |
| c26682.graph_c0 | 1.21276433    | 0.60698937    | 1.36364391    | 15.5022268     | 15.3870619     | 21.7469633     | 3.957E-10 | 3.02355   | up        | PREDICTED: transcription factor bHLH35-like isoform X1 [Nicotiana tomentosiformis]                          |
| c26684.graph_c0 | 3.21498733    | 1.68572729    | 2.16405933    | 0              | 0              | 0              | 7.019E-16 | -Inf      | down      | predicted protein [Nectria haematococca mpVI 77-13-4]                                                       |
| c26685.graph_c0 | 0.08453855    | 0             | 0.07242359    | 6.8276928      | 7.94817319     | 8.47761627     | 1.942E-35 | 6.186397  | up        | PREDICTED: kinesin-like protein NACK1 [Sesamum indicum]                                                     |
| c26690.graph_c0 | 4.65137867    | 5.16565224    | 4.69850004    | 2.79281143     | 4.31374968     | 4.07847913     | 1.618E-09 | -1.400579 | down      | PREDICTED: putative pentatricopeptide repeat-containing protein At5g59900 [Sesamum indicum]                 |
| c26691.graph_c0 | 3.25755322    | 4.6441913     | 4.18608486    | 16.3694755     | 20.3280616     | 26.9461026     | 3.52E-05  | 1.37181   | up        | Ferredoxin [Medicago truncatula]                                                                            |
| c26692.graph_c1 | 1.43408748    | 2.15328525    | 2.30357399    | 14.2026305     | 14.3461525     | 17.9274959     | 0.0003078 | 1.957119  | up        | PREDICTED: fasciclin-like arabinogalactan protein 17 [Sesamum indicum]                                      |
| c26693.graph_c0 | 1.77994775    | 1.83829296    | 1.23441767    | 12.2855154     | 15.0555033     | 13.062309      | 5.513E-17 | 2.0412    | up        | PREDICTED: ATP-dependent 6-phosphofructokinase 4, chloroplastic [Sesamum indicum]                           |
| c26694.graph_c0 | 0.09804912    | 0.07361048    | 0.0629985     | 12.6009296     | 16.0524808     | 17.2604063     | 1.778E-70 | 6.593504  | up        | PREDICTED: putative inactive cadmium/zinc-transporting ATPase HMA3 [Sesamum indicum]                        |
| c26695.graph_c0 | 4.80948768    | 5.11519763    | 4.63528656    | 0.4615431      | 0.39115916     | 0.53388176     | 5.667E-25 | -4.408619 | down      | -                                                                                                           |
| c26696.graph_c0 | 0.23335796    | 0.13348094    | 0.12851752    | 3.53188949     | 3.67653719     | 5.49281269     | 1.712E-12 | 3.663547  | up        | PREDICTED: glutamate synthase 1 [NADH], chloroplastic isoform X1 [Sesamum indicum]                          |
| c26697.graph_c0 | 2.15414048    | 1.64463371    | 1.73596212    | 0              | 0              | 0              | 8.456E-28 | -Inf      | down      | hypothetical protein VHEM100393 [Loropetalum hamiltonianum]                                                 |
| c26698.graph_c0 | 1.19765436    | 1.04416284    | 1.16668651    | 22.8857663     | 23.3209074     | 23.1030463     | 8.219E-70 | 3.327915  | up        | PREDICTED: auxin response factor 9 [Sesamum indicum]                                                        |

| #ID             | 0 h-1<br>FPKM | 0 h-2<br>FPKM | 0 h-3<br>FPKM | 48 h-1<br>FPKM | 48 h-2<br>FPKM | 48 h-3<br>FPKM | FDR       | log2FC    | regulated | nr_annotation                                                                                                          |
|-----------------|---------------|---------------|---------------|----------------|----------------|----------------|-----------|-----------|-----------|------------------------------------------------------------------------------------------------------------------------|
| c26701.graph_c0 | 1.0291294     | 1.07698537    | 1.38258438    | 10.989354      | 12.7832496     | 12.577528      | 7.606E-13 | 2.357882  | up        | PREDICTED: 3-deoxy-manno-octulosonate cytidyltransferase, mitochondrial [Sesamum indicum]                              |
| c26703.graph_c0 | 1.41739228    | 1.0286384     | 1.13837825    | 11.4909891     | 12.8303916     | 11.4736424     | 3.589E-15 | 2.302532  | up        | PREDICTED: probable arabinosyltransferase ARAD1 [Sesamum indicum]                                                      |
| c26708.graph_c0 | 0             | 0             | 0             | 46.7179013     | 75.3229702     | 64.2648561     | 1.216E-48 | Inf       | up        | PREDICTED: intracellular ribonuclease LX-like [Sesamum indicum]                                                        |
| c26709.graph_c0 | 0             | 0             | 0             | 1.9558971      | 2.98616926     | 2.35458506     | 4.674E-12 | Inf       | up        | KECINAME: FUN=OUS ribosomal protein L3 [Peanut<br>arabid]                                                              |
| c26715.graph_c1 | 0.51613562    | 0.53510432    | 0.54481636    | 6.57205883     | 8.27560138     | 9.86718168     | 2.186E-20 | 2.929407  | up        | hypothetical protein MIMGU_mgv1a001258mg [Erythranthe guttata]                                                         |
| c26721.graph_c0 | 0             | 0             | 0             | 30.4092298     | 54.1609199     | 41.745143      | 4.582E-33 | Inf       | up        | hypothetical protein MIMGU_mgv1a020088mg [Erythranthe guttata]                                                         |
| c26721.graph_c1 | 0             | 0             | 0             | 40.8621787     | 60.7143226     | 53.5780819     | 1.029E-59 | Inf       | up        | hypothetical protein MIMGU_mgv1a026045mg [Erythranthe guttata]                                                         |
| c26722.graph_c0 | 4.91935208    | 4.67389105    | 4.98224817    | 41.9404626     | 38.4497607     | 33.1832771     | 1.977E-18 | 1.947124  | up        | PREDICTED: aldose 1-epimerase-like [Sesamum indicum]                                                                   |
| c26726.graph_c0 | 104.171036    | 104.337232    | 103.595568    | 79.8224139     | 92.5869765     | 98.1890216     | 1.918E-17 | -1.226451 | down      | PREDICTED: receptor homology region, transmembrane domain- and RING domain-containing protein 2-like [Sesamum indicum] |
| c26727.graph_c0 | 1.23801183    | 1.40448505    | 0.58332788    | 8.93420844     | 15.2240876     | 14.9181948     | 4.784E-09 | 2.579206  | up        | PREDICTED: uncharacterized protein LOC105174183 [Sesamum indicum]                                                      |
| c26734.graph_c0 | 1130.10945    | 1108.20134    | 1247.469      | 560.33567      | 351.895523     | 250.572263     | 1.775E-44 | -2.590055 | down      | hypothetical protein MIMGU_mgv1a014589mg [Erythranthe guttata]                                                         |
| c26737.graph_c0 | 15.3864814    | 8.15842617    | 10.8160014    | 0              | 0              | 0              | 3.614E-29 | -Inf      | down      | cytochrome c oxidase subunit III (mitochondrion) [Chlorella sorokiniana]                                               |
| c26738.graph_c0 | 0.20906542    | 0.13951651    | 0.13432867    | 6.67696312     | 12.0384385     | 11.6251755     | 3.2E-16   | 4.949333  | up        | PREDICTED: UPF0496 protein At4g34320-like [Sesamum indicum]                                                            |
| c26739.graph_c0 | 0.13113565    | 0.13126696    | 0             | 53.0359041     | 65.3999793     | 67.8303849     | 1.55E-65  | 8.466271  | up        | PREDICTED: NAC domain-containing protein 100-like [Sesamum indicum]                                                    |
| c26741.graph_c0 | 2.21161621    | 1.64360166    | 1.55018967    | 12.8423304     | 14.2916772     | 14.7507553     | 3.571E-14 | 1.937057  | up        | PREDICTED: calcium uptake protein 1, mitochondrial [Sesamum indicum]                                                   |
| c26743.graph_c0 | 26.9953053    | 28.7808405    | 24.7194726    | 9.79148641     | 12.258873      | 12.0725622     | 2.083E-49 | -2.258485 | down      | PREDICTED: endo-1,5(4)-beta-glucanase 2 [Sesamum indicum]                                                              |
| c26744.graph_c0 | 1.74652054    | 1.20193522    | 1.4728534     | 0              | 0.21306869     | 0              | 2.574E-16 | -5.42726  | down      | -                                                                                                                      |
| c26746.graph_c0 | 0             | 0.0352468     | 0             | 6.55271254     | 10.1377836     | 11.3147583     | 1.256E-25 | 8.619815  | up        | PREDICTED: uncharacterized protein LOC105157258 [Sesamum indicum]                                                      |
| c26750.graph_c1 | 3.65393183    | 4.07165756    | 4.16388702    | 0.76216762     | 1.21113627     | 1.52588737     | 5.749E-10 | -2.792598 | down      | hypothetical protein CICLE_V10052119mg [Citrus clamentina]                                                             |
| c26753.graph_c0 | 0.3430803     | 0.08585596    | 0.22043589    | 6.55841001     | 4.60399046     | 4.21853045     | 1.915E-08 | 3.55808   | up        | hypothetical protein CICLE_V10022498mg [Citrus clamentina]                                                             |
| c26754.graph_c0 | 0.08625939    | 0.08634576    | 0.11084673    | 0.79467772     | 1.13651732     | 0.88387432     | 5.307E-05 | 2.286755  | up        | PREDICTED: probable receptor-like protein kinase At5g20050 [Sesamum indicum]                                           |
| c26755.graph_c0 | 4.74696891    | 2.40113626    | 2.95268038    | 0              | 0              | 0              | 4.132E-20 | -Inf      | down      | NADH dehydrogenase subunit 5 [Pneumocystis carinii]                                                                    |

| #ID             | 0 h-1<br>FPKM | 0 h-2<br>FPKM | 0 h-3<br>FPKM | 48 h-1<br>FPKM | 48 h-2<br>FPKM | 48 h-3<br>FPKM | FDR       | log2FC    | regulated | nr_annotation                                                                                    |
|-----------------|---------------|---------------|---------------|----------------|----------------|----------------|-----------|-----------|-----------|--------------------------------------------------------------------------------------------------|
| c26756.graph_c0 | 3.06699925    | 1.94767906    | 2.7122343     | 2.00520757     | 2.05990233     | 2.05455825     | 0.0002122 | -1.354534 | down      | PREDICTED: uncharacterized protein LOC105171097 [Sesamum indicum]                                |
| c26757.graph_c0 | 56.2531835    | 55.7077798    | 53.1382741    | 35.6472871     | 32.8543523     | 28.0878146     | 8.903E-37 | -1.7874   | down      | PREDICTED: protein SPA1-RELATED 4-like [Solanum lycopersicum]                                    |
| c26758.graph_c0 | 0.75856059    | 0.89737839    | 0.443082      | 2.92240299     | 3.56705163     | 4.80496981     | 0.0071142 | 1.410233  | up        | hypothetical protein MIMGU_mgv1a001946mg [Erythranthe guttata]                                   |
| c26760.graph_c0 | 3.27785664    | 2.91656793    | 2.63260972    | 52.3847138     | 52.0740078     | 50.9406233     | 1.18E-61  | 3.122702  | up        | PREDICTED: NAC domain-containing protein 18 [Sesamum indicum]                                    |
| c26762.graph_c0 | 1.09647608    | 1.20733144    | 0.98631062    | 8.01381925     | 8.86421402     | 9.54248506     | 7.234E-17 | 1.987052  | up        | PREDICTED: uncharacterized protein LOC105177385 [Sesamum indicum]                                |
| c26763.graph_c0 | 0             | 0             | 0             | 2.94002364     | 3.27432155     | 5.03079876     | 8.474E-12 | Inf       | up        | unnamed protein product [Coffea canephora]                                                       |
| c26765.graph_c0 | 0.46446595    | 0.19925616    | 0.42632652    | 26.6518282     | 26.744952      | 30.0784265     | 9.139E-47 | 5.238789  | up        | PREDICTED: uncharacterized protein LOC105158032 [Sesamum indicum]                                |
| c26766.graph_c0 | 1.81079752    | 2.24763734    | 1.58232362    | 7.24009557     | 10.6743825     | 10.5687598     | 9.852E-06 | 1.314021  | up        | hypothetical protein MIMGU_mgv1a004061mg [Erythranthe guttata]                                   |
| c26767.graph_c0 | 54.6529913    | 54.2397096    | 49.0132595    | 15.4608879     | 14.9619899     | 14.9672988     | 6.348E-84 | -2.814249 | down      | unnamed protein product [Coffea canephora]                                                       |
| c26773.graph_c0 | 31.1427437    | 34.0242877    | 31.8154361    | 17.0929354     | 17.6690905     | 14.1526561     | 5.62E-42  | -2.003764 | down      | PREDICTED: flavonoid 3-oxylase-like [Sesamum indicum]                                            |
| c26775.graph_c0 | 0.28165492    | 0.56387391    | 0.12064591    | 10.7251272     | 10.6289413     | 18.0858154     | 4.843E-10 | 4.338442  | up        | PREDICTED: transcription factor bHLH35-like isoform X2 [Sesamum indicum]                         |
| c26777.graph_c0 | 14.1023944    | 13.2036696    | 14.6483772    | 4.80075588     | 5.7851188      | 5.1794165      | 8.133E-39 | -2.432904 | down      | PREDICTED: pentatricopeptide repeat-containing protein At5g47360 [Sesamum indicum]               |
| c26779.graph_c0 | 0.05748938    | 0.28773475    | 0.18469033    | 8.0238899      | 8.21979918     | 10.4148751     | 6.569E-32 | 4.630126  | up        | PREDICTED: probable leucine-rich repeat receptor-like protein kinase At1g35710 [Sesamum indicum] |
| c26780.graph_c0 | 31.5938168    | 31.4146168    | 29.3668309    | 1.55233519     | 1.85007476     | 1.72657314     | 4.536E-79 | -5.190229 | down      | PREDICTED: desiccation-related protein PCC3-06 isoform X2 [Sesamum indicum]                      |
| c26783.graph_c0 | 1.42725599    | 2.07808751    | 0.66693834    | 26.3573935     | 43.6882064     | 42.5444902     | 2.461E-16 | 3.73575   | up        | -                                                                                                |
| c26785.graph_c0 | 1.50732417    | 1.19666108    | 0.80150534    | 7.56572291     | 11.3629898     | 13.0377977     | 4.933E-08 | 2.168884  | up        | 1-deoxy-D-xylulose-5-phosphate synthase [Andrographis paniculata]                                |
| c26786.graph_c0 | 9.49467719    | 8.73058825    | 10.2148209    | 1.93250235     | 2.47825232     | 3.2580549      | 5.6E-23   | -2.915933 | down      | hypothetical protein MIMGU_mgv1a013028mg [Erythranthe guttata]                                   |
| c26787.graph_c0 | 15.3789918    | 18.2412996    | 17.7998881    | 12.5184165     | 12.6449191     | 10.1889906     | 5.641E-16 | -1.55743  | down      | PREDICTED: CASP-like protein 4A3 [Sesamum indicum]                                               |
| c26788.graph_c0 | 2.5283713     | 2.60426259    | 1.93059922    | 11.9840826     | 9.36977119     | 8.59076698     | 0.0003523 | 1.075063  | up        | PREDICTED: uncharacterized protein LOC105161938 [Sesamum indicum]                                |
| c26789.graph_c0 | 1.84425579    | 2.50318987    | 1.56657164    | 11.0582154     | 13.4232523     | 15.7330042     | 2.643E-12 | 1.746163  | up        | PREDICTED: uncharacterized protein LOC105174843 [Sesamum indicum]                                |
| c26790.graph_c0 | 4.95812546    | 3.69050302    | 3.1040093     | 3.98213978     | 2.23337342     | 2.39692743     | 0.0015825 | -1.450648 | down      | -                                                                                                |

| #ID             | 0 h-1<br>FPKM | 0 h-2<br>FPKM | 0 h-3<br>FPKM | 48 h-1<br>FPKM | 48 h-2<br>FPKM | 48 h-3<br>FPKM | FDR       | log2FC    | regulated | nr_annotation                                                                         |
|-----------------|---------------|---------------|---------------|----------------|----------------|----------------|-----------|-----------|-----------|---------------------------------------------------------------------------------------|
| c26792.graph_c0 | 0             | 0             | 0             | 2.98069059     | 4.01110734     | 3.15396823     | 5.027E-12 | Inf       | up        | PREDICTED: uncharacterized protein LOC105170774 [Sesamum indicum]                     |
| c26796.graph_c0 | 5.56169541    | 4.86335758    | 4.92896468    | 75.2668048     | 77.6771409     | 76.8238491     | 4.001E-57 | 2.886372  | up        | PREDICTED: acylpyruvase FAHD1, mitochondrial [Sesamum indicum]                        |
| c26803.graph_c0 | 5.51934091    | 4.32072987    | 3.77361181    | 36.8320374     | 34.2539159     | 33.439985      | 3.345E-27 | 1.928118  | up        | PREDICTED: probable sodium-coupled neutral amino acid transporter 6 [Sesamum indicum] |
| c26806.graph_c0 | 0             | 0             | 0             | 1.58178576     | 2.30410154     | 1.78132093     | 1.698E-15 | Inf       | up        | PREDICTED: uncharacterized protein LOC105179467 isoform X2 [Sesamum indicum]          |
| c26809.graph_c0 | 0.82680378    | 1.18233101    | 1.11306967    | 6.42008985     | 6.80130672     | 7.03580508     | 5.104E-06 | 1.677339  | up        | PREDICTED: aluminum-activated malate transporter 2-like [Sesamum indicum]             |
| c26810.graph_c0 | 18.5002897    | 11.3270422    | 13.3870784    | 0              | 0              | 0              | 4.155E-30 | -Inf      | down      | -                                                                                     |
| c26813.graph_c0 | 2.84650355    | 2.21616414    | 1.4225049     | 196.970231     | 230.736526     | 281.042918     | 6.791E-57 | 5.756223  | up        | PREDICTED: non-specific lipid-transfer protein 2-like [Sesamum indicum]               |
| c26813.graph_c1 | 2.35516353    | 3.17358713    | 2.79367235    | 1.50212095     | 1.591315       | 0.81679778     | 1.477E-05 | -2.104465 | down      | PREDICTED: PKA1 family protein FZ-like [Sesamum indicum]                              |
| c26814.graph_c0 | 6.87094134    | 6.14418725    | 9.18260892    | 58.657623      | 63.4818039     | 66.536943      | 4.631E-25 | 2.064357  | up        | hypothetical protein MIMGU_mgv1a016555mg [Erythranthe guttata]                        |
| c26815.graph_c0 | 27.5765226    | 24.5707147    | 28.2976164    | 119.767802     | 118.30253      | 119.900104     | 4.881E-13 | 1.13576   | up        | PREDICTED: tubulin-binding cofactor A [Sesamum indicum]                               |
| c26817.graph_c0 | 0.3319957     | 0.66465629    | 1.27988287    | 27.8329048     | 19.1170294     | 25.854147      | 8.468E-11 | 3.974596  | up        | unknown [Medicago truncatula]                                                         |
| c26817.graph_c1 | 1.3492705     | 1.75080577    | 1.92651779    | 46.9130991     | 56.6243741     | 63.6181245     | 2.562E-57 | 4.030857  | up        | PREDICTED: protein BRASSINAZOLE-RESISTANT 1 [Sesamum indicum]                         |
| c26818.graph_c0 | 64.4910871    | 62.5058671    | 62.554912     | 9.93407262     | 12.8260584     | 12.2814969     | 5.32E-119 | -3.457101 | down      | PREDICTED: uncharacterized protein LOC105165319 [Sesamum indicum]                     |
| c26819.graph_c0 | 1.19267902    | 1.42029756    | 1.13626741    | 14.2651138     | 15.9952061     | 15.1877878     | 4.009E-35 | 2.581532  | up        | PREDICTED: BTB/POZ domain-containing protein At1g63850-like [Sesamum indicum]         |
| c26821.graph_c0 | 4.8033793     | 6.01023645    | 4.56230668    | 61.8083088     | 82.2429194     | 74.3845896     | 1.564E-46 | 2.807864  | up        | hypothetical protein MIMGU_mgv1a008879mg [Erythranthe guttata]                        |
| c26822.graph_c0 | 1.39291113    | 1.81865989    | 1.08953231    | 0.33475841     | 0.23642396     | 0.19857735     | 1.719E-10 | -3.487614 | down      | -                                                                                     |
| c26824.graph_c0 | 0             | 0.2833105     | 0.36370102    | 117.421271     | 131.759615     | 135.879099     | 4.31E-163 | 8.183969  | up        | PREDICTED: arabinogalactan peptide ZZ-like [Sesamum indicum]                          |
| c26826.graph_c0 | 10.2826405    | 10.1519378    | 12.1275508    | 8.30513016     | 9.21069766     | 7.62078784     | 0.0001707 | -1.393347 | down      | hypothetical protein CICLE_v10002915mg [Citrus clementina]                            |
| c26829.graph_c0 | 78.0159633    | 93.9857191    | 79.7650926    | 7.78366887     | 11.1053025     | 11.0031836     | 3.1E-97   | -4.097555 | down      | -                                                                                     |
| c26830.graph_c0 | 5.89609683    | 5.41016747    | 6.3981173     | 3.31947548     | 4.699432       | 4.80639299     | 6.074E-09 | -1.490249 | down      | PREDICTED: F-box/kelch-repeat protein At3g06240-like [Sesamum indicum]                |
| c26830.graph_c1 | 8.35110496    | 8.1365482     | 7.44050702    | 1.43613542     | 2.82547819     | 2.09934908     | 2.379E-12 | -2.937754 | down      | PREDICTED: type 1 phosphatases regulator ypi1 [Sesamum indicum]                       |
| c26833.graph_c0 | 1.62011843    | 0.94601542    | 0.86746513    | 33.7069521     | 26.8142628     | 33.8657803     | 2.385E-33 | 3.770801  | up        | unnamed protein product [Coffea canephora]                                            |

| #ID             | 0 h-1<br>FPKM | 0 h-2<br>FPKM | 0 h-3<br>FPKM | 48 h-1<br>FPKM | 48 h-2<br>FPKM | 48 h-3<br>FPKM | FDR       | log2FC    | regulated | nr_annotation                                                                                          |
|-----------------|---------------|---------------|---------------|----------------|----------------|----------------|-----------|-----------|-----------|--------------------------------------------------------------------------------------------------------|
| c26839.graph_c0 | 0             | 0             | 0             | 42.8815019     | 54.6114483     | 67.5379488     | 1.191E-47 | Inf       | up        | PREDICTED: 36.4 kDa proline-rich protein-like, partial [Cucumis sativus]                               |
| c26840.graph_c0 | 0.08246542    | 0.082548      | 0             | 27.4260823     | 34.6079826     | 36.2335452     | 4.94E-112 | 8.212418  | up        | PREDICTED: uncharacterized protein LOC105157872 [Sesamum indicum]                                      |
| c26843.graph_c0 | 5.75859373    | 7.30152277    | 4.44001256    | 0.47157264     | 1.37382857     | 0.20980125     | 1.682E-15 | -4.116347 | down      | -                                                                                                      |
| c26844.graph_c0 | 17.7153225    | 15.8396879    | 17.9036381    | 159.719997     | 176.903245     | 182.204366     | 7.382E-59 | 2.313644  | up        | PREDICTED: aiconol dehydrogenase class-3 [Sesamum indicum]                                             |
| c26847.graph_c0 | 24.4006139    | 27.7004369    | 23.9072614    | 3.70350879     | 4.01466078     | 2.14581572     | 2.508E-54 | -3.960037 | down      | PREDICTED: WRKY transcription factor 22 [Sesamum indicum]                                              |
| c26848.graph_c0 | 56.9290091    | 50.0111641    | 52.961918     | 443.065489     | 475.595829     | 505.799762     | 6.14E-50  | 2.136227  | up        | TPA: hypothetical protein ZEAMMB73_262778, partial [Zea mays]                                          |
| c26851.graph_c0 | 1.21368323    | 1.95733655    | 1.73292334    | 0.24847203     | 0.26322599     | 0.44217784     | 1.132E-09 | -3.386466 | down      | -                                                                                                      |
| c26853.graph_c0 | 49.7629291    | 54.8733634    | 47.231831     | 41.8419279     | 14.1087193     | 7.36997529     | 5.442E-13 | -2.250841 | down      | PREDICTED: scarecrow-like protein 21 [Sesamum indicum]                                                 |
| c26854.graph_c0 | 1.58550047    | 2.01438107    | 1.56725452    | 176.010307     | 186.223517     | 221.297595     | 1.17E-126 | 5.800551  | up        | PREDICTED: lipoxygenase homology domain-containing protein 1-like [Sesamum indicum]                    |
| c26856.graph_c0 | 0.17672281    | 0.35379955    | 0.22709581    | 114.94286      | 131.426675     | 133.27681      | 4.561E-97 | 7.949454  | up        | PREDICTED: dof zinc finger protein DOF1.4-like isoform X2 [Sesamum indicum]                            |
| c26859.graph_c0 | 2.232391      | 2.00737626    | 1.7017776     | 9.72539238     | 11.5584213     | 11.7242264     | 3.978E-07 | 1.45563   | up        | hypothetical protein MIMGU_mgv1a011616mg [Erythranthe guttata]                                         |
| c26860.graph_c0 | 2.32599749    | 2.12586344    | 2.46917297    | 22.2671166     | 22.7997097     | 25.4089096     | 1.216E-20 | 2.328336  | up        | hypothetical protein MIMGU_mgv1a011282mg [Erythranthe guttata]                                         |
| c26862.graph_c0 | 73.3254192    | 76.640103     | 74.0922918    | 10.3926398     | 13.0995538     | 11.6447588     | 5.92E-125 | -3.693689 | down      | PREDICTED: probable serine/threonine-protein kinase WNK11 [Sesamum indicum]                            |
| c26866.graph_c0 | 0.03798013    | 0.03801816    | 0             | 2.02940685     | 2.59471954     | 2.77089839     | 1.262E-12 | 5.598507  | up        | PREDICTED: methylthioribose kinase [Sesamum indicum]                                                   |
| c26869.graph_c1 | 2.51480591    | 1.67821607    | 2.89499754    | 9.50854659     | 10.3799487     | 9.36254402     | 0.0015143 | 1.023564  | up        | PREDICTED: GDSL esterase/lipase 5 isoform X2 [Sesamum indicum]                                         |
| c26871.graph_c0 | 1.74445425    | 1.30965079    | 2.03153408    | 1.20532878     | 1.4897163      | 1.76514687     | 0.0028494 | -1.21474  | down      | PREDICTED: LOW QUALITY PROTEIN: anthranilate synthase alpha subunit 1, chloroplastic [Sesamum indicum] |
| c26872.graph_c0 | 0             | 0.04976405    | 0.0638848     | 1.37400074     | 2.57153735     | 2.4044026      | 8.486E-10 | 4.762997  | up        | PREDICTED: WAT1-related protein At5g07050-like [Sesamum indicum]                                       |
| c26873.graph_c0 | 4.24690599    | 3.05364915    | 2.69028848    | 3.4165727      | 3.6194445      | 2.59874887     | 0.0054033 | -1.064807 | down      | hypothetical protein MIMGU_mgv1a015234mg [Erythranthe guttata]                                         |
| c26875.graph_c0 | 4.33656446    | 4.34090687    | 7.0586989     | 73.6434899     | 61.651255      | 85.0199023     | 4.245E-22 | 2.785035  | up        | PREDICTED: histone H2A [Nicotiana glauca]                                                              |
| c26878.graph_c0 | 0             | 0.06439695    | 0             | 18.0765325     | 24.5495366     | 24.6803097     | 5.584E-50 | 9.018161  | up        | PREDICTED: probable receptor-like protein kinase At1g80640 isoform X1 [Sesamum indicum]                |
| c26885.graph_c0 | 3.42620939    | 4.15236134    | 4.20038645    | 56.2597474     | 61.2146642     | 60.5621977     | 4.284E-88 | 2.897504  | up        | PREDICTED: LOW QUALITY PROTEIN: SNF2 domain-containing protein CLASSY 1-like [Sesamum indicum]         |
| c26891.graph_c0 | 14.3484255    | 4.78759775    | 4.43884875    | 0              | 0              | 0              | 5.773E-07 | -Inf      | down      | PREDICTED: chlorophyll a-b binding protein of LHCII type 1 [Elaeis guineensis]                         |

| #ID             | 0 h-1<br>FPKM | 0 h-2<br>FPKM | 0 h-3<br>FPKM | 48 h-1<br>FPKM | 48 h-2<br>FPKM | 48 h-3<br>FPKM | FDR       | log2FC    | regulated | nr_annotation                                                                       |
|-----------------|---------------|---------------|---------------|----------------|----------------|----------------|-----------|-----------|-----------|-------------------------------------------------------------------------------------|
| c26893.graph_c0 | 1.40606647    | 1.11770029    | 1.85999377    | 0.72387773     | 0.72649959     | 0.50850162     | 8.691E-06 | -2.1812   | down      | hypothetical protein MIMGU_mgv1a018417mg<br>[Erythranthe guttata]                   |
| c26894.graph_c0 | 0.07117205    | 0.14248664    | 0.36583561    | 6.55683349     | 6.25155302     | 8.63466189     | 3.093E-13 | 4.175234  | up        | hypothetical protein MIMGU_mgv1a008083mg<br>[Erythranthe guttata]                   |
| c26895.graph_c0 | 3.57527569    | 2.72674727    | 2.84413431    | 17.2923301     | 17.2390877     | 17.0613445     | 1.546E-09 | 1.4802    | up        | hypothetical protein MIMGU_mgv1a000048mg<br>[Erythranthe guttata]                   |
| c26897.graph_c0 | 1.82912893    | 1.09857631    | 1.5983421     | 27.1640195     | 27.7058812     | 26.809331      | 4.931E-25 | 3.155894  | up        | PREDICTED: hypoxanthine-guanine<br>phosphoribosyltransferase [Nicotiana sylvestris] |
| c26898.graph_c0 | 0.6932653     | 0.56778504    | 0.48593092    | 7.34483391     | 9.04190716     | 8.05945211     | 2.154E-15 | 2.78921   | up        | PREDICTED: probable receptor-like protein kinase<br>At2g42960 [Nelumbo nucifera]    |
| c26899.graph_c0 | 10.3937641    | 12.5877635    | 8.90426558    | 55.4428259     | 56.4807313     | 60.9032607     | 9.429E-10 | 1.422317  | up        | hypothetical protein MIMGU_mgv1a011204mg<br>[Erythranthe guttata]                   |
| c26901.graph_c0 | 3.23386552    | 3.39895893    | 3.15829037    | 35.4530494     | 35.8223234     | 37.7490555     | 1.401E-43 | 2.459462  | up        | PREDICTED: LL-diaminopimelate aminotransferase,<br>chloroplastic [Sesamum indicum]  |
| c26902.graph_c0 | 0             | 0             | 0             | 3.3058881      | 4.23520359     | 2.80474264     | 2.998E-12 | Inf       | up        | hypothetical protein MIMGU_mgv1a014026mg<br>[Erythranthe guttata]                   |
| c26916.graph_c0 | 14.7571685    | 17.4153464    | 13.4740984    | 2.36128308     | 2.65309874     | 1.52804035     | 1.063E-38 | -3.817017 | down      | hypothetical protein MIMGU_mgv1a026902mg, partial<br>[Erythranthe guttata]          |
| c26918.graph_c0 | 0             | 0.09688252    | 0             | 2.82356507     | 4.12474159     | 3.88759483     | 3.981E-17 | 5.793153  | up        | PREDICTED: probable beta-1,4-xylosyltransferase IRX14<br>[Sesamum indicum]          |
| c26924.graph_c0 | 1.51205362    | 1.18247477    | 1.21440548    | 9.38100065     | 9.13099987     | 8.69576317     | 7.41E-12  | 1.784181  | up        | PREDICTED: cell wall protein RBR3 isoform X2<br>[Sesamum indicum]                   |
| c26928.graph_c0 | 21.2644127    | 16.8132229    | 15.7361502    | 0.91471583     | 0.64602034     | 0.40695432     | 7.891E-62 | -5.777669 | down      | PREDICTED: probable protein phosphatase 2C 51<br>[Sesamum indicum]                  |
| c26932.graph_c0 | 5.84509046    | 5.65176238    | 4.76240309    | 20.5541961     | 23.5467537     | 23.1008217     | 1.715E-09 | 1.029431  | up        | PREDICTED: uncharacterized protein LOC105170351<br>[Sesamum indicum]                |
| c26933.graph_c0 | 2.64060791    | 2.10481184    | 2.10509392    | 15.6999266     | 15.9401557     | 18.0183078     | 3.55E-20  | 1.840737  | up        | PREDICTED: ABC transporter G family member 7 isoform<br>X2 [Sesamum indicum]        |
| c26934.graph_c0 | 0.39252387    | 0.7421764     | 0.78463577    | 61.0331816     | 52.4834732     | 60.3132575     | 2.47E-99  | 5.480753  | up        | PREDICTED: BAG family molecular chaperone regulator 7<br>[Sesamum indicum]          |
| c26939.graph_c0 | 0.37174691    | 0.42936826    | 0.33072196    | 18.5464739     | 24.2247706     | 29.7233266     | 1.085E-28 | 4.979164  | up        | PREDICTED: protein NRT1/ PTR FAMILY 5.10-like<br>[Sesamum indicum]                  |
| c26940.graph_c0 | 3.92851751    | 3.26853097    | 2.88474316    | 15.9339094     | 20.1664254     | 20.3258343     | 1.27E-08  | 1.465395  | up        | PREDICTED: DELLA protein GAI-like [Sesamum<br>indicum]                              |
| c26940.graph_c1 | 0.97629113    | 0.97726874    | 0             | 7.73503839     | 8.76603306     | 5.76216891     | 4.625E-05 | 2.510008  | up        | DELLA protein GAIP-B, putative [Ricinus communis]                                   |
| c26940.graph_c2 | 4.88713012    | 3.94518052    | 4.05171335    | 19.1712671     | 22.5406153     | 23.6492539     | 4.03E-06  | 1.323312  | up        | PREDICTED: LOW QUALITY PROTEIN: DELLA protein<br>GAI [Sesamum indicum]              |
| c26943.graph_c0 | 0             | 0             | 0.06720954    | 3.22829989     | 4.6961088      | 5.31630906     | 6.955E-16 | 6.564692  | up        | PREDICTED: dirigent protein 24-like [Sesamum indicum]                               |

| #ID             | 0 h-1<br>FPKM | 0 h-2<br>FPKM | 0 h-3<br>FPKM | 48 h-1<br>FPKM | 48 h-2<br>FPKM | 48 h-3<br>FPKM | FDR       | log2FC    | regulated | nr_annotation                                                                                     |
|-----------------|---------------|---------------|---------------|----------------|----------------|----------------|-----------|-----------|-----------|---------------------------------------------------------------------------------------------------|
| c26946.graph_c1 | 0             | 0             | 0             | 3.62921052     | 9.25265009     | 8.94253763     | 2.924E-11 | Inf       | up        | PREDICTED: protein NRT1/ PTR FAMILY 2.10-like [Sesamum indicum]                                   |
| c26947.graph_c0 | 90.3026384    | 84.5098337    | 90.8546653    | 12.6696131     | 14.3826456     | 16.8269516     | 1.38E-127 | -3.61932  | down      | hyponeucal protein OsJ_02875 [Oryza sativa japonica Group]                                        |
| c26950.graph_c0 | 0.1146561     | 0.09564243    | 0.1718939     | 39.1002154     | 58.9717087     | 69.7859132     | 1.112E-35 | 7.747415  | up        | PREDICTED: alpha-xylosidase 1 [Sesamum indicum]                                                   |
| c26952.graph_c0 | 0.46903035    | 0.26083334    | 0.73666091    | 10.5144661     | 14.5465632     | 15.3792472     | 1.5E-22   | 3.75399   | up        | hypothetical protein MIMGU_mgv1a006305mg [Erythranthe guttata]                                    |
| c26957.graph_c0 | 0             | 0             | 0             | 4.53973286     | 1.87028197     | 4.41344802     | 1.026E-06 | Inf       | up        | PREDICTED: heat shock factor-binding protein 1 [Sesamum indicum]                                  |
| c26958.graph_c0 | 12.9961981    | 12.9016977    | 14.9063467    | 8.11389689     | 6.28952919     | 6.0751106      | 1.382E-10 | -2.008162 | down      | -                                                                                                 |
| c26959.graph_c0 | 0.30637837    | 0.30668517    | 0             | 7.19752142     | 7.92391693     | 6.27873654     | 5.558E-09 | 4.124333  | up        | -                                                                                                 |
| c26965.graph_c0 | 1.62333324    | 1.57079347    | 1.59930307    | 6.82954346     | 11.6975818     | 14.0832958     | 0.0001915 | 1.738395  | up        | PREDICTED: ethylene-responsive transcription factor ERF118-like [Sesamum indicum]                 |
| c26968.graph_c0 | 4.9854943     | 4.18394324    | 4.14161296    | 115.937509     | 124.099589     | 125.699766     | 4.9E-114  | 3.762673  | up        | PREDICTED: V-type proton ATPase subunit E [Sesamum indicum]                                       |
| c26969.graph_c0 | 0.10425848    | 0.27830102    | 0.13397628    | 7.94010983     | 7.93673612     | 8.29005257     | 4.142E-24 | 4.532313  | up        | PREDICTED: protein trichome birefringence-like 5 [Sesamum indicum]                                |
| c26972.graph_c1 | 7.72154434    | 8.80066114    | 8.84182294    | 7.81790616     | 8.72980596     | 8.14704834     | 0.0005299 | -1.058546 | down      | PREDICTED: telomere repeat-binding factor 4-like isoform X2 [Sesamum indicum]                     |
| c26974.graph_c0 | 299.484742    | 322.388712    | 290.318029    | 54.935071      | 64.6054948     | 75.487507      | 1.35E-99  | -3.246638 | down      | PREDICTED: WW domain-containing protein C11B10.08 [Sesamum indicum]                               |
| c26975.graph_c0 | 5.10844096    | 4.73150898    | 4.22545675    | 2.32606721     | 2.80802609     | 4.01910864     | 1.23E-09  | -1.641628 | down      | PREDICTED: uncharacterized protein LOC105175632 [Sesamum indicum]                                 |
| c26976.graph_c0 | 0.15704198    | 0.39299808    | 0.45406161    | 11.8635397     | 14.2922475     | 16.9283899     | 9.019E-36 | 4.394105  | up        | PREDICTED: 12-oxophytodienoate reductase 3 [Sesamum indicum]                                      |
| c26982.graph_c0 | 0.14325226    | 0.14339571    | 0.18408483    | 0.95020795     | 0.64312479     | 0.98640421     | 0.0072198 | 1.437817  | up        | PREDICTED: pentatricopeptide repeat-containing protein At2g22410, mitochondrial [Sesamum indicum] |
| c26985.graph_c0 | 2.9476693     | 2.74944225    | 2.84090382    | 174.476351     | 237.044523     | 296.24527      | 4.28E-28  | 5.348843  | up        | hypothetical protein MIMGU_mgv1a004588mg [Erythranthe guttata]                                    |
| c26992.graph_c0 | 2.53283036    | 2.30487874    | 2.36711803    | 11.3488506     | 11.4609212     | 14.8168956     | 0.0012166 | 1.36544   | up        | hypothetical protein L484_015058 [Morus notabilis]                                                |
| c26994.graph_c0 | 1.21261836    | 0.58957584    | 0.97947935    | 2.87265375     | 4.12526506     | 5.14054084     | 0.0056929 | 1.10031   | up        | PREDICTED: plastidal glycolate/glycerate translocator 1, chloroplastic [Sesamum indicum]          |
| c26995.graph_c0 | 36.6078112    | 32.13438      | 37.9441597    | 156.767999     | 169.453186     | 156.045501     | 8.06E-16  | 1.157259  | up        | hyponeucal protein PHAVU_003G152300g [Pnaseous vulgaris]                                          |
| c26996.graph_c0 | 4.03167672    | 4.16052972    | 3.73876798    | 24.5829316     | 36.8328859     | 41.3284304     | 3.231E-09 | 2.08181   | up        | PREDICTED: uncharacterized protein LOC105176754 [Sesamum indicum]                                 |
| c27002.graph_c0 | 4.82077705    | 4.53136017    | 3.24853955    | 21.1228483     | 26.3361213     | 25.5900928     | 7.593E-10 | 1.517859  | up        | PREDICTED: ER membrane protein complex subunit 4-like [Fragaria vesca subsp. vesca]               |



| #ID             | 0 h-1<br>FPKM | 0 h-2<br>FPKM | 0 h-3<br>FPKM | 48 h-1<br>FPKM | 48 h-2<br>FPKM | 48 h-3<br>FPKM | FDR       | log2FC    | regulated | nr_annotation                                                                      |
|-----------------|---------------|---------------|---------------|----------------|----------------|----------------|-----------|-----------|-----------|------------------------------------------------------------------------------------|
| c27003.graph_c0 | 0.96064464    | 1.44240987    | 1.32264256    | 5.94219991     | 6.56291433     | 5.68107137     | 0.0045506 | 1.267309  | up        | PREDICTED: bet1-like SNARE 1-2 isoform X1 [Sesamum indicum]                        |
| c27004.graph_c1 | 4.7158969     | 4.50105548    | 3.94612089    | 32.4328831     | 29.6491023     | 23.5543586     | 5.309E-08 | 1.689587  | up        | PREDICTED: membrin-11 [Sesamum indicum]                                            |
| c27013.graph_c0 | 3.30644709    | 2.71748552    | 2.59407468    | 13.8838703     | 17.2219318     | 19.2296781     | 1.258E-11 | 1.525855  | up        | PREDICTED: probable magnesium transporter NIPA4 [Sesamum indicum]                  |
| c27014.graph_c0 | 1.38727706    | 1.41589495    | 1.36324572    | 34.6075922     | 35.9723041     | 35.453923      | 1.855E-82 | 3.651793  | up        | PREDICTED: lysosomal beta glucosidase-like [Sesamum indicum]                       |
| c27015.graph_c0 | 3.40258416    | 5.03494371    | 2.70902125    | 2.45322975     | 2.85157023     | 2.39509246     | 0.0003447 | -1.548982 | down      | PREDICTED: uncharacterized protein LOC105163552 [Sesamum indicum]                  |
| c27017.graph_c0 | 26.4437438    | 25.7548118    | 24.9051826    | 24.7102792     | 25.0286868     | 24.0203438     | 3.33E-12  | -1.080772 | down      | PREDICTED: monoglyceride lipase [Sesamum indicum]                                  |
| c27018.graph_c0 | 3.2162122     | 3.01172741    | 3.11083011    | 2.29392345     | 2.59889303     | 3.20342333     | 0.0003302 | -1.227216 | down      | PREDICTED: vesicle-associated protein 2-2-like [Sesamum indicum]                   |
| c27021.graph_c0 | 0.02732098    | 0             | 0.14043415    | 0.98162479     | 1.62652971     | 1.83647165     | 1.152E-08 | 3.676828  | up        | PREDICTED: uncharacterized protein LOC105169333 [Sesamum indicum]                  |
| c27022.graph_c1 | 11.7363788    | 12.7271419    | 10.6444051    | 8.27473289     | 8.29855207     | 8.11545011     | 1.123E-21 | -1.523892 | down      | PREDICTED: uncharacterized protein LOC105173472 isoform X1 [Sesamum indicum]       |
| c27023.graph_c0 | 0             | 0.06195051    | 0.07952923    | 92.5935971     | 90.4207252     | 107.907564     | 6.25E-169 | 9.974167  | up        | PREDICTED: UPF0483 protein C25G4.2-like [Sesamum indicum]                          |
| c27028.graph_c0 | 3.09944386    | 4.48145748    | 4.42545342    | 1.42770492     | 0.84026681     | 0.42345442     | 5.221E-09 | -3.160829 | down      | PREDICTED: protein UPSTREAM OF FLC-like [Sesamum indicum]                          |
| c27031.graph_c0 | 17.3178179    | 21.69316      | 18.0270494    | 54.9933252     | 101.976435     | 107.065131     | 0.0032572 | 1.182957  | up        | PREDICTED: uncharacterized protein LOC104093193 [Nicotiana tomentosiformis]        |
| c27034.graph_c0 | 56.9919777    | 54.9058802    | 55.4190141    | 52.2855661     | 56.086741      | 58.9203315     | 5.242E-13 | -1.019178 | down      | PREDICTED: capsanthin/capsorubin synthase, chromoplast-like [Sesamum indicum]      |
| c27037.graph_c0 | 1.9051786     | 2.20979847    | 1.90417884    | 12.3140835     | 13.0157641     | 11.4279996     | 1.297E-10 | 1.593495  | up        | PREDICTED: metal transporter Nramp5-like isoform X2 [Sesamum indicum]              |
| c27038.graph_c0 | 0.51375486    | 0.42855776    | 0.22006511    | 3.03703712     | 3.46807692     | 3.47443376     | 4.471E-05 | 2.089403  | up        | PREDICTED: uncharacterized protein LOC105163339 [Sesamum indicum]                  |
| c27043.graph_c0 | 1.68280096    | 2.52672905    | 2.04232887    | 0.86128111     | 1.36863436     | 0.38318138     | 6.353E-06 | -2.278776 | down      | PREDICTED: lysine histidine transporter 1-like [Musa acuminata subsp. malaccensis] |
| c27044.graph_c0 | 3.78439433    | 3.76223737    | 4.23022782    | 4.44161744     | 2.55505842     | 2.27353398     | 4.826E-07 | -1.351458 | down      | PREDICTED: BTB/POZ domain-containing protein At1g67900 [Sesamum indicum]           |
| c27045.graph_c0 | 0             | 0.36720614    | 0.75424383    | 10.6794045     | 11.8147666     | 13.2914294     | 4.742E-17 | 3.957588  | up        | hypothetical protein MIMGU_mgv1a002613mg [Erythranthe guttata]                     |
| c27045.graph_c1 | 0.49335561    | 0.44446467    | 0.69737965    | 10.8173706     | 11.8930422     | 12.3752974     | 1.184E-18 | 3.399391  | up        | PREDICTED: cysteine-rich receptor-like protein kinase 2 [Sesamum indicum]          |
| c27052.graph_c0 | 282.016234    | 255.957385    | 280.989177    | 5.03156557     | 3.24665775     | 4.31425473     | 0         | -7.034643 | down      | PREDICTED: L-idonate D-galacturonase-like [Cucumis sativus]                        |

| #ID             | 0 h-1<br>FPKM | 0 h-2<br>FPKM | 0 h-3<br>FPKM | 48 h-1<br>FPKM | 48 h-2<br>FPKM | 48 h-3<br>FPKM | FDR       | log2FC    | regulated | nr_annotation                                                                       |
|-----------------|---------------|---------------|---------------|----------------|----------------|----------------|-----------|-----------|-----------|-------------------------------------------------------------------------------------|
| c27054.graph_c0 | 0.29370099    | 0.17639705    | 0.07548348    | 6.22325968     | 7.45271802     | 5.87447933     | 3.193E-13 | 4.154721  | up        | PREDICTED: uncharacterized protein LOC105156067 [Sesamum indicum]                   |
| c27056.graph_c0 | 0             | 0             | 0             | 1.39055528     | 2.65740142     | 3.34800913     | 4.571E-10 | Inf       | up        | PREDICTED: probable polygalacturonase non-catalytic subunit JP650 [Sesamum indicum] |
| c27063.graph_c0 | 0.33207294    | 0.16620273    | 0.24892401    | 16.2396381     | 14.4761461     | 15.5387812     | 5.98E-58  | 4.937292  | up        | PREDICTED: uncharacterized protein LOC105165907 [Sesamum indicum]                   |
| c27064.graph_c0 | 7.41809007    | 6.41294751    | 4.98291834    | 2.32978242     | 3.94899515     | 5.45896948     | 5.759E-06 | -1.705502 | down      | PREDICTED: gibberellin 3-beta-dioxygenase 1-like [Cicer arietinum]                  |
| c27067.graph_c0 | 28.0643843    | 29.9903109    | 25.566529     | 14.7063666     | 16.6304365     | 15.4648432     | 1.28E-37  | -1.85529  | down      | PREDICTED: probable beta-1,3-galactosyltransferase 19 [Sesamum indicum]             |
| c27067.graph_c1 | 119.804016    | 125.846153    | 145.313571    | 92.4096183     | 113.906715     | 126.975606     | 8.993E-12 | -1.254296 | down      | PREDICTED: non-specific lipid-transfer protein 2-like [Sesamum indicum]             |
| c27068.graph_c0 | 0             | 0             | 0             | 11.9224902     | 18.1219251     | 12.9147688     | 3.496E-19 | Inf       | up        | --                                                                                  |
| c27069.graph_c0 | 2.4004483     | 2.24266185    | 1.64515792    | 0.9582948      | 1.01519714     | 1.4430053      | 0.0001063 | -1.897797 | down      | hypothetical protein MIMGU_mgv1a001232mg [Erythranthe guttata]                      |
| c27071.graph_c0 | 2.01053102    | 3.45007588    | 2.46058282    | 19.7277442     | 20.8368603     | 20.7975177     | 8.675E-21 | 1.935361  | up        | PREDICTED: uncharacterized protein LOC105167501 [Sesamum indicum]                   |
| c27072.graph_c0 | 110.208019    | 110.008119    | 100.540574    | 23.4960827     | 27.7001591     | 27.2585269     | 1.256E-96 | -3.05097  | down      | PREDICTED: growth-regulating factor 8 isoform X2 [Sesamum indicum]                  |
| c27073.graph_c0 | 2.75900836    | 1.87405895    | 2.91232159    | 12.0280588     | 15.8677322     | 16.6393497     | 2.842E-08 | 1.5364    | up        | PREDICTED: uncharacterized protein LOC105170966 [Sesamum indicum]                   |
| c27075.graph_c0 | 11.2147964    | 11.8962368    | 10.1095298    | 10.9486259     | 8.82157808     | 7.40942479     | 0.0005362 | -1.29988  | down      | PREDICTED: putative RNA-binding protein Luc7-like 2 isoform X2 [Nicotiana glauca]   |
| c27077.graph_c0 | 0.89516456    | 0.83426362    | 0.79332544    | 31.6508022     | 27.3242405     | 30.8954616     | 1.148E-75 | 4.140282  | up        | PREDICTED: LOW QUALITY PROTEIN: 4-coumarate--CoA ligase-like 7 [Sesamum indicum]    |
| c27079.graph_c0 | 6.95490107    | 6.42113795    | 7.07176547    | 968.37448      | 757.494963     | 940.224969     | 1.865E-74 | 6.011738  | up        | hypothetical protein MIMGU_mgv1a008423mg [Erythranthe guttata]                      |
| c27081.graph_c0 | 19.2862261    | 17.4931817    | 19.1187495    | 86.8805709     | 80.8226047     | 84.7266511     | 7.759E-13 | 1.158357  | up        | PREDICTED: uncharacterized protein LOC105166843 [Sesamum indicum]                   |
| c27082.graph_c0 | 32.4560732    | 31.4931015    | 34.4463121    | 19.1564063     | 14.2939571     | 9.22667072     | 6.537E-42 | -2.213957 | down      | PREDICTED: probable BOI-related E3 ubiquitin-protein ligase 2 [Sesamum indicum]     |
| c27083.graph_c0 | 0             | 0             | 0             | 9.15206503     | 11.6843243     | 10.161915      | 1.222E-21 | Inf       | up        | MYB117 [Jatropha curcas]                                                            |
| c27085.graph_c0 | 31.8839211    | 24.8918969    | 25.3109504    | 0.68046829     | 0.24029121     | 0.60547659     | 4.761E-76 | -6.753704 | down      | -                                                                                   |
| c27086.graph_c0 | 0             | 0             | 0             | 70.0991655     | 98.9147139     | 96.4281939     | 9.534E-87 | Inf       | up        | PREDICTED: flavonoid 3',5'-methyltransferase-like [Sesamum indicum]                 |
| c27087.graph_c0 | 0.41980472    | 0.14007503    | 0.26973284    | 23.7207579     | 26.1535575     | 29.279655      | 2.917E-84 | 5.557962  | up        | PREDICTED: 3-ketoacyl-CoA thiolase 2, peroxisomal [Sesamum indicum]                 |

| #ID             | 0 h-1<br>FPKM | 0 h-2<br>FPKM | 0 h-3<br>FPKM | 48 h-1<br>FPKM | 48 h-2<br>FPKM | 48 h-3<br>FPKM | FDR       | log2FC    | regulated | nr_annotation                                                                                                                                                   |
|-----------------|---------------|---------------|---------------|----------------|----------------|----------------|-----------|-----------|-----------|-----------------------------------------------------------------------------------------------------------------------------------------------------------------|
| c27089.graph_c0 | 1.00289533    | 0.79475383    | 1.18136352    | 3.5994874      | 6.15824905     | 6.64538647     | 0.0002347 | 1.431069  | up        | PREDICTED: high affinity nitrate transporter 2.5 [Sesamum indicum]                                                                                              |
| c27090.graph_c0 | 0.21709742    | 0.21731481    | 0.09299293    | 2.00004301     | 2.4719369      | 3.85585687     | 1.632E-05 | 2.964102  | up        | PREDICTED: uncharacterized protein LOC103992241 isoform X1 [Musa acuminata subsp. malaccensis]                                                                  |
| c27091.graph_c0 | 11.2883711    | 10.6036802    | 9.2502053     | 2.82597384     | 3.79211705     | 2.68217016     | 2.47E-31  | -2.762325 | down      | PREDICTED: uncharacterized protein LOC105176468 [Sesamum indicum]                                                                                               |
| c27092.graph_c0 | 3.78141317    | 3.53900783    | 4.30617849    | 2.94555434     | 3.00044005     | 3.20056673     | 4.863E-06 | -1.366123 | down      | PREDICTED: F-box/FBD/LRR-repeat protein At5g53840-like isoform X1 [Sesamum indicum]                                                                             |
| c27097.graph_c0 | 9.88172009    | 5.50240971    | 5.83881486    | 0              | 0              | 0              | 7.836E-25 | -Inf      | down      | --                                                                                                                                                              |
| c27099.graph_c0 | 0.32293863    | 0.25860961    | 0.74698007    | 6.78327663     | 7.94248634     | 7.25345148     | 3.553E-10 | 3.017493  | up        | PREDICTED: GDSL esterase/lipase CPRD49-like [Sesamum indicum]                                                                                                   |
| c27099.graph_c1 | 0.5003733     | 0             | 0             | 7.06830665     | 6.99966509     | 6.56278618     | 3.893E-09 | 4.370228  | up        | PREDICTED: GDSL esterase/lipase CPRD49-like [Sesamum indicum]                                                                                                   |
| c27101.graph_c0 | 0             | 0             | 0.03540727    | 0.60921673     | 1.72104335     | 1.06156821     | 1.999E-05 | 5.517401  | up        | PREDICTED: UDP-glucuronate:xyran alpha-glucuronosyltransferase 1-like isoform X1 [Sesamum indicum]                                                              |
| c27102.graph_c0 | 11.3355401    | 8.54902738    | 10.5757636    | 58.0327776     | 58.397179      | 64.7904927     | 1.158E-21 | 1.554142  | up        | PREDICTED: ATP-dependent Clp protease proteolytic subunit 3, chloroplastic [Sesamum indicum]                                                                    |
| c27104.graph_c0 | 0.30035216    | 0.60130584    | 0.77192884    | 9.60558175     | 16.5411519     | 18.0084704     | 8.828E-12 | 3.687074  | up        | PREDICTED: protein GLUTAMINE DUMPER 5-like [Sesamum indicum]                                                                                                    |
| c27105.graph_c0 | 0.04911234    | 0.14748455    | 0.0631113     | 2.6242383      | 3.21145125     | 3.05969639     | 6.56E-10  | 4.079877  | up        | PREDICTED: squamosa promoter-binding-like protein 9 [Sesamum indicum]                                                                                           |
| c27109.graph_c0 | 0             | 0             | 0             | 1.29363704     | 3.33675169     | 2.95274597     | 2.941E-09 | Inf       | up        | PREDICTED: root phototropism protein 2-like [Sesamum indicum]                                                                                                   |
| c27114.graph_c0 | 5.58817179    | 5.91524839    | 4.95242896    | 41.9547763     | 77.7334806     | 84.8242798     | 6.071E-07 | 2.608569  | up        | PREDICTED: 14-3-3-like protein 16R [Sesamum indicum]                                                                                                            |
| c27115.graph_c0 | 10.8440727    | 11.3338255    | 13.7301354    | 7.63961603     | 3.2684266      | 1.8301458      | 4.302E-10 | -2.492606 | down      | -                                                                                                                                                               |
| c27116.graph_c0 | 2.22823056    | 1.21661552    | 2.16921552    | 12.5033653     | 17.265669      | 21.3098827     | 3.063E-08 | 2.159155  | up        | PREDICTED: growth-regulating factor 6-like [Sesamum indicum]                                                                                                    |
| c27117.graph_c0 | 5.15371226    | 5.6610641     | 6.0366425     | 66.1349654     | 71.3528262     | 79.371733      | 5.477E-59 | 2.664775  | up        | PREDICTED: very-long-chain 3-oxoacyl-CoA reductase 1-like [Sesamum indicum]                                                                                     |
| c27118.graph_c0 | 26.4244873    | 27.8541252    | 23.3635861    | 13.2802766     | 13.5583622     | 12.6913869     | 4.389E-43 | -1.989696 | down      | PREDICTED: LOW QUALITY PROTEIN: putative SWI/SNF-related matrix-associated actin-dependent regulator of chromatin subfamily A member 3-like 1 [Sesamum indicum] |
| c27119.graph_c0 | 4.41421521    | 2.70027718    | 3.62405973    | 2.93703437     | 2.75242042     | 0.90462306     | 0.0003132 | -1.712285 | down      | -                                                                                                                                                               |
| c27120.graph_c0 | 0.65255488    | 0.6205479     | 0.37735148    | 114.704403     | 62.6364792     | 49.6675907     | 2.875E-08 | 6.106186  | up        | PREDICTED: aureusidin synthase-like [Sesamum indicum]                                                                                                           |
| c27121.graph_c0 | 172.753427    | 189.200933    | 170.704446    | 5.25300073     | 5.18890939     | 4.54776175     | 9.58E-277 | -6.166855 | down      | PREDICTED: uncharacterized protein LOC105159027 [Sesamum indicum]                                                                                               |
| c27128.graph_c0 | 45.9495475    | 46.4489654    | 43.2666318    | 44.5108997     | 41.5052566     | 39.8943212     | 1.237E-14 | -1.122687 | down      | PREDICTED: uncharacterized protein LOC105174416 isoform X1 [Sesamum indicum]                                                                                    |

| #ID             | 0 h-1<br>FPKM | 0 h-2<br>FPKM | 0 h-3<br>FPKM | 48 h-1<br>FPKM | 48 h-2<br>FPKM | 48 h-3<br>FPKM | FDR       | log2FC    | regulated | nr_annotation                                                                               |
|-----------------|---------------|---------------|---------------|----------------|----------------|----------------|-----------|-----------|-----------|---------------------------------------------------------------------------------------------|
| c27129.graph_c0 | 0             | 0             | 0             | 4.38422532     | 6.3033248      | 6.52830002     | 3.218E-21 | Inf       | up        | PREDICTED: kinesin-like protein NACK1 [Sesamum indicum]                                     |
| c27130.graph_c0 | 0.02561602    | 0             | 0             | 0.84956935     | 1.62502837     | 0.90293037     | 1.124E-07 | 6.038259  | up        | PREDICTED: wuon vinnu neapeace [Eminnania nuxieyi]                                          |
| c27132.graph_c0 | 1.13231781    | 1.29537332    | 1.03933801    | 24.4398662     | 23.9966059     | 24.5310519     | 2.61E-22  | 3.37968   | up        | COMPLET<br>hypothetical protein MIMGU_mgv1a012883mg [Erythranthe guttata]                   |
| c27142.graph_c0 | 9.37321123    | 9.69535032    | 9.38502162    | 5.90072926     | 8.04258298     | 8.06773915     | 1.022E-10 | -1.39338  | down      | PREDICTED: LOW QUALITY PROTEIN: uncharacterized protein LOC105176443 [Sesamum indicum]      |
| c27143.graph_c0 | 138.692907    | 145.008625    | 139.333365    | 136.841583     | 145.755708     | 135.550743     | 1.611E-13 | -1.034725 | down      | hypothetical protein MIMGU_mgv1a010222mg [Erythranthe guttata]                              |
| c27145.graph_c0 | 2.29943494    | 2.41134402    | 3.16592671    | 22.0917756     | 27.5178816     | 25.4016783     | 2.377E-19 | 2.227034  | up        | PREDICTED: transmembrane 9 superfamily member 9-like [Sesamum indicum]                      |
| c27150.graph_c0 | 1.68049299    | 1.17361099    | 1.65729072    | 0              | 0              | 0              | 9.271E-24 | -Inf      | down      | mRNA cleavage factor complex subunit [Schizosaccharomyces japonicus yFS275]                 |
| c27151.graph_c0 | 138.37461     | 137.403401    | 140.775385    | 38.8120519     | 46.2562456     | 40.4987874     | 2.059E-79 | -2.750059 | down      | PREDICTED: probable protein phosphatase 2C 63 [Sesamum indicum]                             |
| c27152.graph_c0 | 1.44769156    | 1.16736375    | 1.55028414    | 0              | 0              | 0              | 1.547E-22 | -Inf      | down      | hypothetical protein KNAG_0E02970 [Kazachstania naganishii CBS 8797]                        |
| c27153.graph_c0 | 2.7411428     | 3.36347517    | 2.91645947    | 11.7305165     | 14.9872643     | 17.7344987     | 1.955E-07 | 1.277923  | up        | PREDICTED: ERAD-associated E3 ubiquitin-protein ligase HRD1B-like [Sesamum indicum]         |
| c27155.graph_c1 | 3.96400649    | 4.21597433    | 3.37471225    | 20.2224036     | 24.1071275     | 18.1562451     | 7.669E-13 | 1.418161  | up        | PREDICTED: plant intracellular Ras-group-related LRR protein 5-like [Sesamum indicum]       |
| c27156.graph_c0 | 10.0181041    | 10.138335     | 11.2703474    | 7.87704803     | 7.80755983     | 7.85122722     | 1.684E-12 | -1.435683 | down      | PREDICTED: polynucleotide 5'-hydroxyl-kinase NOL9 [Sesamum indicum]                         |
| c27157.graph_c0 | 1.54452424    | 1.11660672    | 0.90049968    | 14.5453684     | 14.7949251     | 14.5015631     | 3.876E-44 | 2.608648  | up        | PREDICTED: serine/threonine-protein kinase D6PKL1-like [Sesamum indicum]                    |
| c27158.graph_c0 | 562.953248    | 538.606693    | 581.511915    | 29.0873706     | 23.3006513     | 27.029235      | 6.21E-225 | -5.420299 | down      | hypothetical protein MIMGU_mgv1a015139mg [Erythranthe guttata]                              |
| c27158.graph_c1 | 1.85968772    | 3.38018273    | 2.95577105    | 43.8235312     | 24.7890405     | 19.3364885     | 0.0023405 | 2.418076  | up        | PREDICTED: uncharacterized protein LOC104093419 [Nicotiana tomentosiformis]                 |
| c27160.graph_c0 | 0.41872408    | 0.7335009     | 0.58291677    | 13.3407261     | 10.8976437     | 10.0684705     | 5.652E-20 | 3.291667  | up        | PREDICTED: NAC domain-containing protein 8 [Sesamum indicum]                                |
| c27163.graph_c0 | 57.2848429    | 51.7780018    | 62.1050138    | 325.182167     | 318.119274     | 328.329521     | 8.792E-25 | 1.486464  | up        | hypothetical protein MIMGU_mgv1a017510mg [Erythranthe guttata]                              |
| c27165.graph_c0 | 13.2215243    | 13.8147732    | 12.6805875    | 4.14105686     | 3.95853477     | 3.6846875      | 8.387E-65 | -2.76824  | down      | PREDICTED: uncharacterized protein LOC105161407 [Sesamum indicum]                           |
| c27166.graph_c0 | 19.0175871    | 20.5880738    | 16.9022966    | 2.58558633     | 3.22970299     | 3.22776241     | 2.777E-75 | -3.663581 | down      | PREDICTED: probable LRR receptor-like serine/threonine-protein kinase RLK [Sesamum indicum] |

| #ID             | 0 h-1<br>FPKM | 0 h-2<br>FPKM | 0 h-3<br>FPKM | 48 h-1<br>FPKM | 48 h-2<br>FPKM | 48 h-3<br>FPKM | FDR       | log2FC    | regulated | nr_annotation                                                                  |
|-----------------|---------------|---------------|---------------|----------------|----------------|----------------|-----------|-----------|-----------|--------------------------------------------------------------------------------|
| c27171.graph_c0 | 0             | 0.10623295    | 0.06818849    | 3.07978075     | 4.91987547     | 4.4802881      | 2.737E-13 | 5.129976  | up        | PREDICTED: short-chain dehydrogenase TIC 32, chloroplastic [Sesamum indicum]   |
| c27173.graph_c0 | 14.1247942    | 12.4725632    | 12.900118     | 6.18102383     | 6.05571103     | 5.45848567     | 2.021E-22 | -2.174087 | down      | PREDICTED: uncharacterized protein LOC105179147 [Sesamum indicum]              |
| c27176.graph_c0 | 3.62223083    | 3.77693536    | 2.61827439    | 0.62569412     | 0.36824836     | 0.43301912     | 7.82E-14  | -3.816024 | down      | PREDICTED: phospholipase A1-Ibeta2, chloroplastic [Sesamum indicum]            |
| c27178.graph_c0 | 83.9686391    | 74.4664161    | 82.4040443    | 54.0654732     | 56.4907007     | 58.1556202     | 3.958E-27 | -1.532236 | down      | PREDICTED: multiprotein-bridging factor 1b-like [Sesamum indicum]              |
| c27180.graph_c0 | 0.1196463     | 0             | 0             | 2.86587531     | 1.67371843     | 1.76541135     | 3.767E-07 | 4.734172  | up        | PREDICTED: uncharacterized protein LOC105169888 [Sesamum indicum]              |
| c27182.graph_c0 | 0             | 0             | 0             | 2.38399381     | 8.61278114     | 6.20061596     | 1.048E-06 | Inf       | up        | PREDICTED: heme oxygenase 1, chloroplastic-like [Sesamum indicum]              |
| c27183.graph_c0 | 1.22659341    | 1.49640765    | 1.42845037    | 6.81542021     | 9.24024607     | 11.9086904     | 3.908E-06 | 1.726363  | up        | PREDICTED: putative MO25-like protein At5g47540 [Sesamum indicum]              |
| c27185.graph_c0 | 49.7589501    | 46.0797769    | 48.726024     | 16.6695238     | 14.283289      | 14.832442      | 5.405E-40 | -2.673485 | down      | hypothetical protein MIMGU_mgv1a015987mg [Erythranthe guttata]                 |
| c27187.graph_c0 | 5.13882144    | 4.53879458    | 5.16078805    | 26.2967879     | 28.8276075     | 28.6731713     | 2.867E-14 | 1.477923  | up        | oioin carboxyl carrier protein subunit [Camelina chekiangensis]                |
| c27188.graph_c0 | 8.74792019    | 7.05399214    | 7.26008619    | 39.7361098     | 40.5540614     | 42.2789463     | 3.446E-13 | 1.393137  | up        | hypothetical protein M569_02688 [Genlisea aurea]                               |
| c27197.graph_c0 | 0.03628889    | 0.01816261    | 0.09326532    | 2.20649172     | 1.84167488     | 1.81458647     | 5.152E-14 | 4.282972  | up        | PREDICTED: uncharacterized protein LOC105158016 [Sesamum indicum]              |
| c27200.graph_c0 | 0.43515993    | 0.47519528    | 0.47447081    | 2.87917446     | 4.04110875     | 3.52392537     | 1.302E-09 | 1.891586  | up        | hypothetical protein MIMGU_mgv1a000304mg [Erythranthe guttata]                 |
| c27204.graph_c0 | 0             | 0.11023399    | 0.09434223    | 29.9286807     | 40.6980769     | 43.1803014     | 2.09E-67  | 8.087471  | up        | PREDICTED: serine/threonine-protein kinase-like protein ACR4 [Sesamum indicum] |
| c27205.graph_c0 | 3.06081358    | 2.65143334    | 2.87431023    | 2.38600248     | 2.98725855     | 2.55731102     | 0.0068737 | -1.135066 | down      | PREDICTED: dnaJ homolog subfamily B member 6 isoform X1 [Sesamum indicum]      |
| c27206.graph_c0 | 0.14255472    | 0.2140462     | 0             | 2.36395267     | 3.33909495     | 3.62257539     | 4.571E-08 | 3.700123  | up        | PREDICTED: uncharacterized protein LOC105160269 [Sesamum indicum]              |
| c27209.graph_c0 | 14.0279383    | 12.5993155    | 13.9519831    | 84.1352115     | 80.4101834     | 71.8700603     | 2.013E-23 | 1.526505  | up        | PREDICTED: heme oxygenase 1, chloroplastic-like [Sesamum indicum]              |
| c27212.graph_c0 | 48.8195597    | 54.169429     | 46.8386391    | 9.14761275     | 10.2157041     | 9.83521807     | 1.11E-104 | -3.377727 | down      | PREDICTED: uncharacterized protein LOC105171942 [Sesamum indicum]              |
| c27216.graph_c0 | 0.52483189    | 0.85370582    | 0.33721488    | 38.0159241     | 40.8495089     | 41.0863661     | 1.8E-64   | 5.114465  | up        | PREDICTED: GDSL esterase/lipase CPRD49-like isoform X1 [Sesamum indicum]       |
| c27217.graph_c0 | 0.4430605     | 0.49894218    | 0.35584393    | 2.50007942     | 2.70258265     | 2.76934477     | 0.0027484 | 1.602443  | up        | -                                                                              |
| c27218.graph_c0 | 0.89082739    | 1.48619903    | 1.14474846    | 50.5179239     | 36.0648186     | 29.5613391     | 2.794E-11 | 4.034182  | up        | PREDICTED: glucan endo-1,3-beta-glucosidase 13-like [Sesamum indicum]          |

| #ID             | 0 h-1<br>FPKM | 0 h-2<br>FPKM | 0 h-3<br>FPKM | 48 h-1<br>FPKM | 48 h-2<br>FPKM | 48 h-3<br>FPKM | FDR       | log2FC    | regulated | nr_annotation                                                                                       |
|-----------------|---------------|---------------|---------------|----------------|----------------|----------------|-----------|-----------|-----------|-----------------------------------------------------------------------------------------------------|
| c27220.graph_c0 | 1.11348969    | 0.97950108    | 0.82383904    | 0.21759804     | 0              | 0              | 4.851E-15 | -4.702285 | down      | -                                                                                                   |
| c27222.graph_c0 | 1.88874381    | 1.96477765    | 1.80843533    | 18.1509428     | 20.3130495     | 19.3078599     | 1.083E-22 | 2.332428  | up        | hypothetical protein MIMGU_mgv1a006093mg<br>[Erythranthe guttata]                                   |
| c27224.graph_c0 | 19.5930506    | 17.7634754    | 15.1426758    | 7.71009777     | 11.3367364     | 10.8527376     | 8.571E-26 | -1.833907 | down      | PREDICTED: uncharacterized protein LOC105158173<br>[Sesamum indicum]                                |
| c27229.graph_c0 | 0.0872445     | 0             | 0.05605632    | 1.40656815     | 2.5970112      | 2.86069915     | 1.58E-08  | 4.553591  | up        | PREDICTED: probable protein S-acyltransferase 4<br>[Sesamum indicum]                                |
| c27230.graph_c0 | 5.36102275    | 5.9030301     | 4.97001268    | 105.234356     | 103.709499     | 114.040512     | 9.15E-99  | 3.297664  | up        | PREDICTED: BAG family molecular chaperone regulator 7<br>[Sesamum indicum]                          |
| c27233.graph_c1 | 15.7967045    | 15.1800216    | 15.3695387    | 3.20165        | 2.42268568     | 2.77481388     | 9.712E-56 | -3.476989 | down      | hypothetical protein MIMGU_mgv1a022117mg<br>[Erythranthe guttata]                                   |
| c27235.graph_c1 | 0.38645154    | 0.25789234    | 0.33107035    | 18.513267      | 16.972409      | 22.491972      | 9.045E-19 | 4.875582  | up        | PREDICTED: enolase-like [Sesamum indicum]                                                           |
| c27237.graph_c0 | 6.85949209    | 6.67294221    | 6.60483163    | 4.04086314     | 5.31800385     | 5.17947217     | 1.399E-15 | -1.492012 | down      | PREDICTED: U-box domain-containing protein 45<br>[Sesamum indicum]                                  |
| c27242.graph_c0 | 11.0970101    | 9.87815704    | 9.47383632    | 3.53747043     | 7.15776507     | 8.62447857     | 3.004E-15 | -1.685184 | down      | PREDICTED: RING-H2 finger protein ATL46-like<br>[Sesamum indicum]                                   |
| c27244.graph_c0 | 18.9355193    | 17.0427624    | 17.9624782    | 222.400384     | 223.470992     | 232.432264     | 4.969E-75 | 2.634853  | up        | PREDICTED: ATP synthase subunit gamma, mitochondrial<br>[Sesamum indicum]                           |
| c27247.graph_c0 | 5.15621971    | 6.24527329    | 5.69831396    | 29.2140123     | 32.710012      | 30.9397386     | 9.343E-19 | 1.421675  | up        | PREDICTED: NADP-dependent malic enzyme-like isoform<br>X1 [Sesamum indicum]                         |
| c27249.graph_c0 | 8.14994023    | 8.21475464    | 8.10929888    | 6.62186512     | 8.81025648     | 8.53657969     | 5.658E-08 | -1.052484 | down      | unnamed protein product [Coffea canephora]                                                          |
| c27253.graph_c0 | 1.13600635    | 1.13714389    | 1.31383182    | 64.7822586     | 91.5791774     | 94.9850103     | 3.514E-41 | 5.105191  | up        | hypothetical protein MIMGU_mgv1a016583mg<br>[Erythranthe guttata]                                   |
| c27254.graph_c1 | 0.29772224    | 0.17029735    | 0.21861992    | 2.35098126     | 1.950954       | 3.24242794     | 7.817E-06 | 2.441079  | up        | PREDICTED: cytochrome P450 81E8-like [Sesamum<br>indicum]                                           |
| c27255.graph_c0 | 0.4255344     | 0.73021801    | 0.54682855    | 3.08023603     | 4.09375316     | 5.97987382     | 0.0002128 | 1.92418   | up        | PREDICTED: uncharacterized protein LOC105159742<br>[Sesamum indicum]                                |
| c27256.graph_c0 | 2.70946149    | 1.59539683    | 1.63847778    | 6.75424129     | 13.5328493     | 11.7584673     | 0.0046209 | 1.406031  | up        | hypothetical protein M569_10374, partial [Genlisea aurea]                                           |
| c27258.graph_c0 | 3.07647529    | 2.5662966     | 1.67719684    | 0.81592037     | 0.31845162     | 0.57315871     | 4.365E-10 | -3.098448 | down      | -                                                                                                   |
| c27260.graph_c0 | 0             | 0             | 0.11933787    | 5.5610886      | 5.89129906     | 5.51917203     | 2.849E-19 | 6.101457  | up        | PREDICTED: WAT1-related protein At1g43650-like<br>[Sesamum indicum]                                 |
| c27262.graph_c0 | 7.37727859    | 7.68005245    | 7.58407605    | 34.9256555     | 50.6032499     | 50.6418295     | 4.203E-11 | 1.564099  | up        | PREDICTED: ER membrane protein complex subunit 1<br>[Sesamum indicum]                               |
| c27264.graph_c0 | 0.75378519    | 0.51739885    | 1.27307472    | 0              | 0.0630575      | 0.10592658     | 4.92E-06  | -4.965352 | down      | PREDICTED: probable leucine-rich repeat receptor-like<br>protein kinase At5g63930 [Sesamum indicum] |
| c27265.graph_c0 | 5.21926027    | 5.5443531     | 3.55879303    | 14.1305818     | 21.5188547     | 24.0988379     | 0.0024851 | 1.039055  | up        | PREDICTED: probable methyltransferase PMT11<br>[Sesamum indicum]                                    |

| #ID             | 0 h-1<br>FPKM | 0 h-2<br>FPKM | 0 h-3<br>FPKM | 48 h-1<br>FPKM | 48 h-2<br>FPKM | 48 h-3<br>FPKM | FDR       | log2FC    | regulated | nr_annotation                                                                        |
|-----------------|---------------|---------------|---------------|----------------|----------------|----------------|-----------|-----------|-----------|--------------------------------------------------------------------------------------|
| c27266.graph_c0 | 0.04928634    | 0.09867138    | 0             | 28.5148347     | 38.4815411     | 39.7553682     | 3.08E-70  | 8.486611  | up        | PREDICTED: palmitoyl-protein thioesterase 1 [Sesamum indicum]                        |
| c27269.graph_c0 | 9.3056852     | 10.6632276    | 10.4634022    | 7.55777999     | 7.11029571     | 6.9256095      | 9.139E-09 | -1.511732 | down      | hypothetical protein glysoja_049431 [Glycine soja]                                   |
| c27273.graph_c0 | 2.51463262    | 2.30738809    | 2.87235776    | 82.112145      | 102.32663      | 92.7028398     | 1.211E-97 | 4.147982  | up        | unnamed protein product [Coffea canephora]                                           |
| c27274.graph_c1 | 0.15947166    | 0             | 0             | 11.018677      | 10.8947553     | 13.07247       | 1.381E-14 | 6.77998   | up        | TPX2 family protein, putative isoform 1 [Theobroma cacao]                            |
| c27276.graph_c0 | 0.29370078    | 0.04199927    | 0.10783346    | 8.29123131     | 6.36756494     | 5.45143035     | 3.083E-16 | 4.499095  | up        | hyponeucal protein P1A V U 0020220200g [Pnaseous yloceial]                           |
| c27279.graph_c0 | 2.68775679    | 2.12993814    | 2.15867118    | 0              | 0              | 0              | 6.78E-19  | -Inf      | down      | PREDICTED: inorganic phosphate transporter 1-11-like [Sesamum indicum]               |
| c27280.graph_c0 | 4.0199322     | 2.12720223    | 2.00259004    | 0              | 0              | 0              | 4.344E-17 | -Inf      | down      | predicted protein [Hordeum vulgare subsp. vulgare]                                   |
| c27282.graph_c0 | 806.354253    | 753.647759    | 837.92116     | 26.5237501     | 19.6824049     | 18.9476496     | 1.84E-199 | -6.213533 | down      | hypothetical protein MIMGU_mgv1a005561mg [Erythranthe guttata]                       |
| c27283.graph_c0 | 45.0235688    | 47.2002786    | 43.4709866    | 264.846774     | 267.984369     | 245.783679     | 7.732E-27 | 1.504122  | up        | PREDICTED: blue copper protein-like [Nicotiana tomentosiformis]                      |
| c27284.graph_c0 | 4.86722414    | 5.10410259    | 6.15529674    | 0              | 0.15080187     | 0.18999239     | 2.249E-28 | -6.61298  | down      | -                                                                                    |
| c27285.graph_c0 | 0.16678156    | 0.38954664    | 0.2857612     | 8.55318594     | 6.99926453     | 8.74988082     | 8.091E-15 | 3.834055  | up        | PREDICTED: protein XRI1-like [Sesamum indicum]                                       |
| c27287.graph_c0 | 0.04954524    | 0             | 0.12733518    | 1.27804053     | 1.69241121     | 1.21842083     | 9.165E-08 | 3.527596  | up        | PREDICTED: calmodulin-like protein 3 [Sesamum indicum]                               |
| c27288.graph_c0 | 19.2092436    | 20.790456     | 18.9110606    | 10.2116036     | 17.7498497     | 18.0621772     | 2.58E-19  | -1.382817 | down      | PREDICTED: pre-rRNA-processing protein esf1 [Sesamum indicum]                        |
| c27289.graph_c0 | 0             | 0.15148862    | 0.06482471    | 2.13779771     | 2.75707169     | 1.98490388     | 7.485E-09 | 3.969453  | up        | hypothetical protein MIMGU_mgv1a007466mg [Erythranthe guttata]                       |
| c27290.graph_c0 | 1.76571973    | 1.61153302    | 1.93534039    | 58.2739987     | 49.671224      | 59.5146891     | 1.542E-62 | 3.961078  | up        | -                                                                                    |
| c27304.graph_c0 | 8.09818085    | 6.74261501    | 6.74314164    | 5.22937318     | 6.94332478     | 6.61769217     | 4.499E-10 | -1.220963 | down      | PREDICTED: F-box/kelch-repeat protein At1g55270 [Sesamum indicum]                    |
| c27312.graph_c0 | 2.18560687    | 2.22907458    | 1.90772243    | 7.40824722     | 10.826408      | 10.918748      | 0.0001122 | 1.182312  | up        | PREDICTED: uncharacterized protein LOC105166961 [Sesamum indicum]                    |
| c27313.graph_c0 | 10.1805561    | 7.69113235    | 11.3545511    | 44.4174918     | 43.3055485     | 47.5528684     | 6.217E-05 | 1.190595  | up        | unnamed protein product [Coffea canephora]                                           |
| c27314.graph_c0 | 6.78563859    | 7.7220821     | 6.64091813    | 35.1898472     | 40.3494424     | 44.2661689     | 2.919E-25 | 1.482112  | up        | PREDICTED: carbamoyl-phosphate synthase large chain, chloroplastic [Sesamum indicum] |
| c27317.graph_c0 | 0.08865708    | 0.17749172    | 0             | 7.7592853      | 9.69097321     | 8.50302476     | 1.832E-15 | 5.601745  | up        | PREDICTED: transcription factor bHLH79-like [Sesamum indicum]                        |
| c27318.graph_c0 | 28.8449762    | 32.9883852    | 29.8388838    | 2.4580833      | 2.25214374     | 1.71428228     | 1.24E-102 | -4.84826  | down      | hypothetical protein MIMGU_mgv1a022206mg [Erythranthe guttata]                       |
| c27323.graph_c0 | 3.3804496     | 4.59854447    | 4.12124175    | 20.1231089     | 31.1310386     | 38.0845468     | 1.327E-05 | 1.856988  | up        | 1-deoxy-D-xylulose 5-phosphate reductoisomerase [Lavandula angustifolia]             |
| c27324.graph_c0 | 42.3037815    | 43.5208323    | 39.1715604    | 11.2858222     | 12.4587809     | 10.112445      | 3.56E-85  | -2.901237 | down      | PREDICTED: lysM domain receptor-like kinase 3 [Sesamum indicum]                      |

| #ID             | 0 h-1<br>FPKM | 0 h-2<br>FPKM | 0 h-3<br>FPKM | 48 h-1<br>FPKM | 48 h-2<br>FPKM | 48 h-3<br>FPKM | FDR       | log2FC    | regulated | nr_annotation                                                                                  |
|-----------------|---------------|---------------|---------------|----------------|----------------|----------------|-----------|-----------|-----------|------------------------------------------------------------------------------------------------|
| c27330.graph_c0 | 8.78339159    | 8.31693348    | 7.62635536    | 1.96828376     | 1.62178954     | 2.33515607     | 1.727E-09 | -3.076623 | down      | PREDICTED: T-complex protein 1 subunit alpha [Sesamum indicum]                                 |
| c27332.graph_c0 | 0             | 0             | 0             | 3.27084031     | 3.86268839     | 3.19664034     | 3.225E-14 | Inf       | up        | predicted protein [Hordeum vulgare subsp. vulgare]                                             |
| c27333.graph_c0 | 0             | 0             | 0             | 6.28453598     | 7.59211841     | 8.04454861     | 1.018E-21 | Inf       | up        | PREDICTED: transcription factor bHLH118-like [Sesamum indicum]                                 |
| c27335.graph_c0 | 8.7574214     | 8.31014604    | 8.97688662    | 29.4735129     | 37.6461917     | 43.4876132     | 4.331E-07 | 1.062967  | up        | PREDICTED: L-ascorbate oxidase homolog [Sesamum indicum]                                       |
| c27338.graph_c0 | 6.27892446    | 8.48827581    | 7.07048098    | 6.73870812     | 6.06485874     | 5.41237452     | 2.715E-05 | -1.276058 | down      | PREDICTED: clathrin light chain 2-like [Sesamum indicum]                                       |
| c27340.graph_c0 | 100.811686    | 100.912633    | 98.9307675    | 409.459278     | 412.174857     | 421.465819     | 1.517E-13 | 1.030255  | up        | PREDICTED: 60S ribosomal protein L22-2-like [Sesamum indicum]                                  |
| c27341.graph_c0 | 1.52639033    | 0.9822335     | 0.84063086    | 8.23637481     | 8.7254404      | 7.68617321     | 0.000204  | 1.866802  | up        | hypothetical protein MIMGU_mgv1a004267mg [Erythranthe guttata]                                 |
| c27342.graph_c0 | 4.64636634    | 3.89387635    | 4.95249476    | 30.4946693     | 38.3868353     | 45.7645906     | 3.523E-14 | 2.062609  | up        | PREDICTED: pyruvate dehydrogenase E1 component subunit beta-like [Sesamum indicum]             |
| c27348.graph_c0 | 1.4661475     | 0.97841041    | 0.92109482    | 29.1153196     | 38.1577122     | 40.622674      | 1.434E-45 | 3.983401  | up        | PREDICTED: endoglucanase 25-like [Sesamum indicum]                                             |
| c27349.graph_c0 | 4.4570799     | 2.43563826    | 3.0683165     | 0              | 0              | 0              | 2.473E-30 | -Inf      | down      | alpha-2 macroglobulin family-like protein [Micromonas sp. RCC299]                              |
| c27350.graph_c0 | 0.07439785    | 0             | 0             | 6.44277453     | 11.3997673     | 9.75785878     | 9.762E-19 | 7.530007  | up        | -                                                                                              |
| c27353.graph_c0 | 64.6405875    | 67.1728908    | 61.3753555    | 51.665648      | 63.2876854     | 66.0949626     | 2.052E-15 | -1.114447 | down      | PREDICTED: xyloglucan 6-xylosyltransferase 2-like [Sesamum indicum]                            |
| c27356.graph_c0 | 6.4844187     | 5.75435449    | 5.20057205    | 34.2332377     | 37.6573566     | 40.6768699     | 1.045E-19 | 1.672489  | up        | PREDICTED: protein TRIGALACTOSYLDIACYLGLYCEROL 1, chloroplastic- [Sesamum indicum]             |
| c27359.graph_c0 | 8.01399895    | 8.65406199    | 8.98761245    | 95.3080576     | 96.0848726     | 101.048786     | 4.363E-58 | 2.491882  | up        | PREDICTED: pectinesterase-like isoform A1 [Sesamum indicum]                                    |
| c27361.graph_c0 | 11.4866023    | 11.9153744    | 10.7729585    | 1.96282877     | 1.80815572     | 1.67057788     | 1.896E-44 | -3.665187 | down      | unnamed protein product [Coffea canephora]                                                     |
| c27363.graph_c0 | 43.6070316    | 38.3520579    | 51.9878631    | 1.04497912     | 0.61501593     | 0.20662581     | 5.537E-60 | -7.166625 | down      | -                                                                                              |
| c27366.graph_c0 | 4.64074435    | 4.25213071    | 4.66986219    | 19.5218654     | 20.6570851     | 18.4573489     | 3.636E-10 | 1.094074  | up        | PREDICTED: uncharacterized protein LOC105171129 [Sesamum indicum]                              |
| c27369.graph_c0 | 4.71124535    | 3.75678404    | 5.13062441    | 1.02990324     | 0.93519223     | 1.63643162     | 1.636E-10 | -2.93903  | down      | -                                                                                              |
| c27373.graph_c0 | 0.15111292    | 0.09075854    | 0.34953496    | 2.97920274     | 4.18847454     | 4.48419327     | 5.71E-12  | 3.264065  | up        | PREDICTED: probable glycerol-3-phosphate dehydrogenase [NAD(+)] 1, cytosolic [Sesamum indicum] |
| c27376.graph_c0 | 15.7918563    | 20.2768535    | 14.5558272    | 7.99785992     | 9.76385046     | 8.33641012     | 1.099E-14 | -1.974139 | down      | -                                                                                              |
| c27382.graph_c0 | 0.38009145    | 0.35120497    | 0.41328909    | 12.7944917     | 16.9498994     | 16.9448725     | 4.095E-49 | 4.326348  | up        | PREDICTED: protein NRT1/ PTR FAMILY 5.2-like [Sesamum indicum]                                 |
| c27384.graph_c0 | 54.5700025    | 54.3273114    | 49.4034993    | 9.30410581     | 10.1050569     | 10.2962448     | 3.91E-108 | -3.431952 | down      | unnamed protein product [Coffea canephora]                                                     |
| c27386.graph_c0 | 5.34526878    | 6.85548349    | 7.72749227    | 26.3148173     | 25.4319758     | 33.6844004     | 0.0014233 | 1.077851  | up        | hypothetical protein MIMGU_mgv1a013949mg [Erythranthe guttata]                                 |
| c27388.graph_c0 | 0.44618129    | 0.31902005    | 0.81908659    | 3.93434818     | 3.85692268     | 4.44126186     | 0.0001029 | 1.92203   | up        | ribosomal protein S4 (chloroplast) [Andrographis paniculata]                                   |



| #ID             | 0 h-1<br>FPKM | 0 h-2<br>FPKM | 0 h-3<br>FPKM | 48 h-1<br>FPKM | 48 h-2<br>FPKM | 48 h-3<br>FPKM | FDR       | log2FC    | regulated | nr_annotation                                                                                  |
|-----------------|---------------|---------------|---------------|----------------|----------------|----------------|-----------|-----------|-----------|------------------------------------------------------------------------------------------------|
| c27389.graph_c0 | 2.8235241     | 2.42258694    | 2.07333729    | 27.870156      | 48.4210834     | 62.3982458     | 4.903E-07 | 3.218278  | up        | PREDICTED: expansin-A18-like [Sesamum indicum]                                                 |
| c27390.graph_c0 | 0             | 0             | 0             | 2.70991751     | 3.3241178      | 5.83780748     | 2.584E-06 | Inf       | up        | hypothetical protein M569_07000 [Genlisea aurea]                                               |
| c27390.graph_c1 | 0             | 0             | 0             | 3.66247135     | 3.20095404     | 3.91061398     | 7.365E-12 | Inf       | up        | unnamed protein product [Coffea canephora]                                                     |
| c27391.graph_c0 | 4.0257316     | 3.45408237    | 4.2230404     | 1.28671492     | 0.96220125     | 0.74082489     | 3.831E-10 | -2.979283 | down      | unnamed protein product [Coffea canephora]                                                     |
| c27391.graph_c1 | 4.07624457    | 3.62695672    | 3.37568742    | 2.25318142     | 1.32609584     | 1.78210425     | 7.75E-06  | -2.054885 | down      | serine glyoxylate aminotransferase 2 [Glycine max]                                             |
| c27395.graph_c0 | 0             | 0.1379293     | 0             | 22.0244985     | 17.0789641     | 16.0957375     | 1.177E-29 | 7.644474  | up        | PREDICTED: uncharacterized protein LOC100247103 isoform X1 [Vitis vinifera]                    |
| c27396.graph_c0 | 1665.78492    | 1427.69534    | 1516.48269    | 369.805818     | 397.565812     | 407.874184     | 2.032E-80 | -2.990326 | down      | PREDICTED: abscisic acid 8'-hydroxylase 2 isoform X2 [Sesamum indicum]                         |
| c27400.graph_c0 | 9.40437917    | 11.4977664    | 8.25654551    | 52.1489071     | 52.6881086     | 47.6375956     | 3.09E-18  | 1.371851  | up        | PREDICTED: ferredoxin--NADP reductase, root-type isozyme, chloroplastic-like [Sesamum indicum] |
| c27405.graph_c0 | 259.280677    | 273.745016    | 369.65664     | 345.132815     | 254.830499     | 244.115609     | 0.0008522 | -1.111564 | down      | ATP synthase subunit alpha [Medicago truncatula]                                               |
| c27410.graph_c0 | 0.14865947    | 0.11904666    | 0.11461998    | 10.3811738     | 9.02441157     | 13.0879312     | 2.195E-31 | 5.393329  | up        | PREDICTED: transcription factor MYC2 [Sesamum indicum]                                         |
| c27411.graph_c0 | 18.4209297    | 19.7246235    | 18.1830397    | 11.9735401     | 11.6359956     | 10.4177061     | 3.634E-29 | -1.742772 | down      | PREDICTED: ankyrin repeat and zinc finger domain-containing protein 1 [Sesamum indicum]        |
| c27414.graph_c0 | 18.8857477    | 16.6935877    | 16.0846733    | 16.9917935     | 16.1324041     | 18.1973553     | 3.883E-10 | -1.025686 | down      | PREDICTED: LOW QUALITY PROTEIN: BAG family molecular chaperone regulator 2 [Sesamum indicum]   |
| c27415.graph_c0 | 0.11688227    | 0.14039917    | 0.12015867    | 3.74724899     | 6.91285085     | 9.31298791     | 3.154E-08 | 4.696619  | up        | PREDICTED: uncharacterized protein LOC105161921 [Sesamum indicum]                              |
| c27419.graph_c1 | 59.3911928    | 52.2657175    | 56.158485     | 27.1527046     | 35.2123253     | 35.0428682     | 1.338E-32 | -1.806825 | down      | PREDICTED: uncharacterized protein LOC105161274 [Sesamum indicum]                              |
| c27427.graph_c0 | 1.58099053    | 1.0550491     | 1.40279588    | 0              | 0              | 0              | 5.103E-23 | -Inf      | down      | DEAD-domain-containing protein [Punctularia strigosozonata HHB-11173 SS5]                      |
| c27428.graph_c0 | 0             | 0.14587534    | 0.2809021     | 8.4245288      | 5.4757533      | 5.19649618     | 1.159E-10 | 4.458087  | up        | PREDICTED: U-box domain-containing protein 26-like [Sesamum indicum]                           |
| c27432.graph_c0 | 1.24960002    | 1.25085131    | 1.14698965    | 26.3134411     | 29.4439195     | 30.2912695     | 1.936E-14 | 3.54136   | up        | hypothetical protein MIMGU_mgv1a022792mg, partial [Erythranthe guttata]                        |
| c27434.graph_c0 | 1.41243565    | 1.18580967    | 0.93679264    | 5.33083668     | 4.71355714     | 6.01321869     | 0.004855  | 1.17007   | up        | PREDICTED: putative minor protease uip-4 [Sesamum indicum]                                     |
| c27437.graph_c0 | 0.22450844    | 0.0642095     | 0.08242921    | 24.4947972     | 26.9509279     | 29.8666914     | 7.36E-105 | 6.762876  | up        | hypothetical protein PHAVU_010G112100g [Pnaseous unlabel]                                      |
| c27438.graph_c0 | 0.13861709    | 0.13875589    | 0             | 5.61893654     | 5.81729598     | 10.2266508     | 4.45E-08  | 5.281049  | up        | unknown [Lotus japonicus]                                                                      |
| c27438.graph_c1 | 0             | 0             | 0             | 3.24983446     | 5.37413549     | 12.4130789     | 7.414E-05 | Inf       | up        | PREDICTED: auxin-induced protein IAA6 [Sesamum indicum]                                        |
| c27438.graph_c2 | 0.250355      | 0.50121139    | 0.32171609    | 10.6095944     | 11.321025      | 13.7500798     | 2.717E-15 | 4.035422  | up        | PREDICTED: PGR5-like protein 1A, chloroplastic [Sesamum indicum]                               |
| c27439.graph_c1 | 0.40540756    | 0.20290676    | 0.39072358    | 14.6905236     | 14.4088052     | 13.1546214     | 7.222E-40 | 4.38419   | up        | PREDICTED: uncharacterized protein LOC105174869 [Sesamum indicum]                              |

| #ID             | 0 h-1<br>FPKM | 0 h-2<br>FPKM | 0 h-3<br>FPKM | 48 h-1<br>FPKM | 48 h-2<br>FPKM | 48 h-3<br>FPKM | FDR       | log2FC    | regulated | nr_annotation                                                                                             |
|-----------------|---------------|---------------|---------------|----------------|----------------|----------------|-----------|-----------|-----------|-----------------------------------------------------------------------------------------------------------|
| c27440.graph_c0 | 0.04680039    | 0.09369451    | 0.12028072    | 1.85396971     | 2.146759       | 1.34273927     | 2.256E-07 | 3.332666  | up        | hypothetical protein MIMGU_mgv1a018556mg, partial [Erythranthe guttata]                                   |
| c27456.graph_c0 | 716.622161    | 716.657582    | 798.109808    | 103.541435     | 59.407438      | 50.8807311     | 1.39E-117 | -4.389134 | down      | PREDICTED: CBL-interacting protein kinase 2 [Sesamum indicum]                                             |
| c27457.graph_c0 | 28.7382681    | 31.5315435    | 26.1368711    | 24.5299346     | 24.3851273     | 23.224875      | 3.803E-20 | -1.275903 | down      | PREDICTED: protein OBERON 3 [Sesamum indicum]                                                             |
| c27459.graph_c0 | 0.01683437    | 0             | 0             | 3.56705058     | 4.09102406     | 4.70571128     | 1.042E-35 | 8.52076   | up        | PREDICTED: filament-like plant protein 7 isoform X2 [Sesamum indicum]                                     |
| c27464.graph_c0 | 0.26442882    | 0.1764624     | 0.11326717    | 37.5563994     | 51.7438928     | 53.6485683     | 7.916E-64 | 6.994586  | up        | PREDICTED: fasciclin-like arabinogalactan protein 2 [Sesamum indicum]                                     |
| c27465.graph_c0 | 12.7363586    | 12.353177     | 11.9954879    | 6.26761818     | 6.89713735     | 7.69524214     | 2.411E-26 | -1.849626 | down      | PREDICTED: uncharacterized protein LOC105174651 [Sesamum indicum]                                         |
| c27466.graph_c0 | 29.8422622    | 31.4036274    | 28.7930768    | 17.2473112     | 19.8770091     | 18.6774842     | 1.076E-33 | -1.709312 | down      | PREDICTED: flowering time control protein FPA [Sesamum indicum]                                           |
| c27470.graph_c1 | 7.12226207    | 7.45102073    | 6.19334577    | 6.11748161     | 4.49469983     | 5.75058132     | 2.129E-06 | -1.355631 | down      | PREDICTED: RING-H2 finger protein ATL43-like [Sesamum indicum]                                            |
| c27470.graph_c2 | 0.07236581    | 0.07243827    | 0             | 2.00004301     | 2.96632428     | 2.90672287     | 1.696E-09 | 4.756847  | up        | -                                                                                                         |
| c27474.graph_c0 | 19.1257073    | 23.0283355    | 19.6793256    | 0.37622453     | 0.79712855     | 0.27896861     | 2.86E-99  | -6.437514 | down      | PREDICTED: uncharacterized protein LOC105176742 [Sesamum indicum]                                         |
| c27475.graph_c0 | 38.3030693    | 36.6442182    | 41.4961418    | 175.158419     | 190.673827     | 213.281787     | 3.559E-20 | 1.293269  | up        | PREDICTED: 60S ribosomal protein L22-2 [Sesamum indicum]                                                  |
| c27476.graph_c0 | 0             | 0.08282376    | 0.31897602    | 3.12527908     | 2.98784405     | 3.18780885     | 5.183E-08 | 3.492328  | up        | hypothetical protein PRUPE_ppa003008mg [Prunus persica]                                                   |
| c27477.graph_c0 | 3.89801961    | 4.43806496    | 3.8619852     | 5.78415413     | 3.31065181     | 2.70750861     | 0.0002455 | -1.051056 | down      | PREDICTED: LOW QUALITY PROTEIN: receptor-like protein kinase HSL1 [Sesamum indicum]                       |
| c27478.graph_c0 | 0.07219573    | 0.07226802    | 0.04638719    | 0.73162557     | 1.3739852      | 2.17491855     | 0.000437  | 3.461152  | up        | PREDICTED: probably inactive leucine-rich repeat receptor-like protein kinase At3g28040 [Sesamum indicum] |
| c27479.graph_c0 | 0.0761324     | 0             | 0             | 2.73538706     | 3.34362797     | 3.1204243      | 6.664E-11 | 5.917497  | up        | PREDICTED: putative F-box protein At5g62060 [Sesamum indicum]                                             |
| c27481.graph_c0 | 1.04726577    | 0.58239692    | 0.29906177    | 5.57445511     | 4.88336054     | 5.15089035     | 0.0004104 | 2.011345  | up        | PREDICTED: 60S ribosomal protein L32-1-like [Brachypodium distachyon]                                     |
| c27482.graph_c0 | 4.83637779    | 8.06870114    | 5.14951917    | 3.35229854     | 5.52932303     | 5.58813358     | 0.0011907 | -1.344102 | down      | PREDICTED: uncharacterized protein LOC105173594 [Sesamum indicum]                                         |
| c27483.graph_c0 | 0             | 0.15179669    | 0             | 4.68012147     | 5.10602183     | 5.65604923     | 5.704E-13 | 5.660437  | up        | PREDICTED: uncharacterized protein LOC105176460 isoform X2 [Sesamum indicum]                              |
| c27486.graph_c0 | 28.0810388    | 28.8087069    | 25.2270163    | 12.1741574     | 14.447169      | 15.4154695     | 1.687E-28 | -1.985883 | down      | PREDICTED: probable membrane-associated kinase regulator 1 [Solanum lycopersicum]                         |
| c27490.graph_c0 | 0             | 0.03700263    | 0             | 0.85137832     | 2.05640517     | 2.54537239     | 6.053E-06 | 6.182571  | up        | PREDICTED: cytochrome P450 76A1 [Sesamum indicum]                                                         |
| c27498.graph_c0 | 1.8214495     | 2.31415471    | 1.98053707    | 14.3924036     | 15.5888675     | 15.3330726     | 4.928E-08 | 1.870539  | up        | unnamed protein product [Coffea canephora]                                                                |
| c27501.graph_c0 | 37.1437689    | 32.9831121    | 34.2936872    | 17.9626041     | 21.0490603     | 23.6620086     | 8.379E-28 | -1.7573   | down      | unknown [Picea sitchensis]                                                                                |

| #ID             | 0 h-1<br>FPKM | 0 h-2<br>FPKM | 0 h-3<br>FPKM | 48 h-1<br>FPKM | 48 h-2<br>FPKM | 48 h-3<br>FPKM | FDR       | log2FC    | regulated | nr_annotation                                                                                             |
|-----------------|---------------|---------------|---------------|----------------|----------------|----------------|-----------|-----------|-----------|-----------------------------------------------------------------------------------------------------------|
| c27502.graph_c0 | 31.3811051    | 35.0796924    | 31.9688173    | 37.4395195     | 27.0792387     | 27.0744607     | 1.212E-12 | -1.114453 | down      | PREDICTED: calcium-dependent protein kinase 32 isoform X1 [Sesamum indicum]                               |
| c27503.graph_c0 | 3.44282208    | 3.37080379    | 4.32728321    | 0.09260591     | 0.22073564     | 0.14420031     | 5.689E-45 | -5.63837  | down      | hypothetical protein MIMGU_mgv1a026576mg, partial [Erythranthe guttata]                                   |
| c27505.graph_c0 | 0             | 0             | 0             | 124.342175     | 133.627454     | 113.42435      | 3.48E-224 | Inf       | up        | plasma membrane intrinsic protein [Olea europaea]                                                         |
| c27507.graph_c0 | 1.36373328    | 0.85950668    | 0.71396162    | 29.9199818     | 28.7881962     | 27.0780613     | 1.037E-45 | 3.857316  | up        | PREDICTED: uncharacterized protein LOC105172180 [Sesamum indicum]                                         |
| c27508.graph_c0 | 0.25709585    | 0.20016367    | 0.25696094    | 2.0790471      | 2.34189693     | 2.55242624     | 5.523E-06 | 2.266179  | up        | -                                                                                                         |
| c27510.graph_c0 | 0.47363158    | 0.60956467    | 0.78253115    | 4.73740905     | 3.8300685      | 3.38334741     | 0.0009539 | 1.662592  | up        | PREDICTED: uncharacterized protein LOC105170878 [Sesamum indicum]                                         |
| c27511.graph_c0 | 227.333194    | 220.181959    | 209.626456    | 93.8597073     | 88.9523253     | 75.9438031     | 9.562E-58 | -2.358997 | down      | PREDICTED: glutamate D-transferase-like [Sesamum indicum]                                                 |
| c27512.graph_c0 | 28.5727871    | 29.0564207    | 28.5392492    | 19.44321       | 22.1187861     | 23.2624531     | 1.166E-16 | -1.430774 | down      | PREDICTED: multiple myeloma tumor-associated protein 2 homolog [Sesamum indicum]                          |
| c27515.graph_c0 | 128.590267    | 134.819816    | 148.612866    | 37.4321242     | 88.26864       | 141.430877     | 6.174E-08 | -1.659802 | down      | hypothetical protein MIMGU_mgv1a022248mg, partial [Erythranthe guttata]                                   |
| c27518.graph_c0 | 0             | 0             | 0             | 25.1102833     | 27.6907734     | 30.9598959     | 6.522E-45 | Inf       | up        | hypothetical protein MIMGU_mgv1a013970mg [Erythranthe guttata]                                            |
| c27519.graph_c0 | 15.6308104    | 18.75908      | 15.4481865    | 7.80113183     | 8.75208556     | 7.3510566      | 1.011E-36 | -2.077494 | down      | PREDICTED: F-box protein ATG315/0-like [Sesamum indicum]                                                  |
| c27527.graph_c0 | 10.8459486    | 13.2641886    | 12.7255192    | 10.252656      | 11.0455382     | 9.93452197     | 1.262E-09 | -1.257017 | down      | hypothetical protein MIMGU_mgv1a009219mg [Erythranthe guttata]                                            |
| c27529.graph_c0 | 0.84356256    | 0.50664436    | 0.57813935    | 4.6628691      | 3.84202343     | 5.39369076     | 0.0001406 | 1.835408  | up        | PREDICTED: alpha/beta hydrolase domain-containing protein 11 isoform X1 [Sesamum indicum]                 |
| c27531.graph_c0 | 1.7063004     | 1.39171104    | 0.81209762    | 232.008947     | 292.968732     | 301.034832     | 1.77E-147 | 6.707445  | up        | PREDICTED: RING-H2 finger protein ATL79-like [Sesamum indicum]                                            |
| c27533.graph_c0 | 0             | 0             | 0             | 3.4879533      | 3.58309196     | 1.97499264     | 5.604E-11 | Inf       | up        | PREDICTED: probable trehalose-phosphate phosphatase J [Sesamum indicum]                                   |
| c27536.graph_c0 | 0.05012597    | 0             | 0.12882772    | 1.33920014     | 1.46764155     | 2.01341377     | 3.075E-08 | 3.712265  | up        | PREDICTED: protein IQ-DOMAIN 1 [Sesamum indicum]                                                          |
| c27537.graph_c0 | 2.72745383    | 3.08020867    | 2.6061974     | 2.57713678     | 0.54603279     | 1.71984061     | 8.196E-05 | -1.794667 | down      | BnaC03g60650D [Brassica napus]                                                                            |
| c27538.graph_c0 | 38.5841192    | 40.574808     | 31.1454477    | 15.5274046     | 16.3134569     | 12.4459905     | 1.035E-25 | -2.33053  | down      | -                                                                                                         |
| c27545.graph_c0 | 0.16552945    | 0.2711376     | 0.25138678    | 5.5591914      | 9.10563418     | 10.4728386     | 5.811E-14 | 4.161958  | up        | PREDICTED: probably inactive leucine-rich repeat receptor-like protein kinase At3g28040 [Sesamum indicum] |
| c27546.graph_c0 | 0             | 0.06114516    | 0.07849535    | 1.29431488     | 2.50387506     | 2.90422038     | 5.254E-08 | 4.542256  | up        | PREDICTED: peptide-N4-(N-acetyl-beta-glucosaminyl)asparagine amidase A-like [Sesamum indicum]             |
| c27548.graph_c0 | 16.9430342    | 16.5147495    | 18.9145083    | 5.02916183     | 7.34050674     | 9.016131       | 2.622E-35 | -2.319032 | down      | PREDICTED: mitochondrial substrate carrier family protein B-like [Sesamum indicum]                        |
| c27550.graph_c0 | 0             | 0             | 0             | 3.35261756     | 5.69750557     | 6.52561645     | 4.892E-13 | Inf       | up        | PREDICTED: galactose oxidase-like [Sesamum indicum]                                                       |

| #ID             | 0 h-1<br>FPKM | 0 h-2<br>FPKM | 0 h-3<br>FPKM | 48 h-1<br>FPKM | 48 h-2<br>FPKM | 48 h-3<br>FPKM | FDR       | log2FC    | regulated | nr_annotation                                                                         |
|-----------------|---------------|---------------|---------------|----------------|----------------|----------------|-----------|-----------|-----------|---------------------------------------------------------------------------------------|
| c27555.graph_c0 | 4.9016927     | 5.15679596    | 4.47879934    | 21.9007917     | 24.1227775     | 21.1718332     | 3.458E-15 | 1.191447  | up        | PREDICTED: primary amine oxidase-like [Sesamum indicum]                               |
| c27557.graph_c0 | 5.87585541    | 6.26120624    | 5.84570852    | 1.22234028     | 2.58984263     | 3.41826897     | 2.698E-06 | -2.345309 | down      | PREDICTED: uncharacterized protein At5g65660-like [Sesamum indicum]                   |
| c27558.graph_c0 | 1.78347379    | 2.20043633    | 1.97204357    | 7.71852513     | 15.0988211     | 17.2717416     | 0.0009526 | 1.72114   | up        | PREDICTED: D-amino-acid transaminase, chloroplastic-like [Sesamum indicum]            |
| c27561.graph_c0 | 59.9359416    | 60.3875769    | 56.9606564    | 21.5893749     | 20.122184      | 19.6270096     | 5.499E-68 | -2.546451 | down      | PREDICTED: cytosolic Fe-S cluster assembly factor NBP35-like [Sesamum indicum]        |
| c27563.graph_c0 | 0             | 0             | 0.06499346    | 1.72400907     | 1.1353164      | 1.36817367     | 6.953E-10 | 4.98033   | up        | PREDICTED: uncharacterized protein LOC105158131 isoform X1 [Sesamum indicum]          |
| c27568.graph_c0 | 10.6424111    | 9.11429141    | 10.6368264    | 70.9190957     | 86.9017318     | 76.7709383     | 1.89E-21  | 1.92736   | up        | PREDICTED: probable stress-associated endoplasmic reticulum protein [Sesamum indicum] |
| c27569.graph_c0 | 6.23966465    | 6.47512054    | 5.48034037    | 7.04045449     | 3.60354873     | 3.87135364     | 6.303E-08 | -1.328573 | down      | hypothetical protein MIMGU_mgv1a002973mg [Erythranthe guttata]                        |
| c27572.graph_c0 | 2.77776659    | 1.60092163    | 1.83885396    | 0.07754727     | 0              | 0              | 2.452E-16 | -7.28272  | down      | PREDICTED: protein IAL1-like [Sesamum indicum]                                        |
| c27575.graph_c0 | 11.1081151    | 10.6874231    | 15.7988147    | 0.19870913     | 0              | 0.08840509     | 3.674E-29 | -8.021633 | down      | -                                                                                     |
| c27576.graph_c0 | 8.84781085    | 8.11241256    | 8.50345433    | 41.5093728     | 47.3846833     | 43.2124856     | 1.251E-11 | 1.356028  | up        | PREDICTED: 60S ribosomal protein L14-2 [Sesamum indicum]                              |
| c27577.graph_c0 | 0.62653174    | 0.49276788    | 0.69010122    | 9.31768794     | 9.34683874     | 10.5652962     | 6.108E-15 | 2.993402  | up        | PREDICTED: protein INVOLVED IN DE NOVO 2-like [Sesamum indicum]                       |
| c27582.graph_c0 | 1.73758231    | 2.48014467    | 2.06746487    | 26.8870771     | 19.3135752     | 19.5453737     | 7.507E-10 | 2.375724  | up        | PREDICTED: glycerol-3-phosphate acyltransferase 1 [Sesamum indicum]                   |
| c27584.graph_c0 | 0.45873328    | 0.09183853    | 0.35369426    | 7.01540933     | 9.84960612     | 8.87455116     | 2.131E-11 | 3.807229  | up        | PREDICTED: uncharacterized protein LOC105159891 [Sesamum indicum]                     |
| c27587.graph_c0 | 0.72846948    | 0.36459947    | 0.73551667    | 46.4027119     | 58.6544875     | 45.1703475     | 1.853E-66 | 5.337762  | up        | Tubulin beta-7 chain [Gossypium arboreum]                                             |
| c27588.graph_c0 | 31.0915017    | 31.8990834    | 32.1457894    | 27.5716204     | 31.4167964     | 25.433844      | 4.682E-13 | -1.191054 | down      | PREDICTED: E3 ubiquitin-protein ligase CIP8-like [Sesamum indicum]                    |
| c27592.graph_c0 | 0.14105409    | 0.14119533    | 0.6344103     | 7.79689352     | 9.22351397     | 11.1002063     | 8.943E-15 | 3.899627  | up        | PREDICTED: transcription factor MYB44-like [Sesamum indicum]                          |
| c27593.graph_c0 | 0             | 0.04725455    | 0             | 6.69752607     | 5.22926689     | 5.66918701     | 4.867E-35 | 7.539126  | up        | PREDICTED: wall-associated receptor kinase 2-like [Sesamum indicum]                   |
| c27596.graph_c0 | 0             | 0.31733097    | 0             | 2.26341496     | 2.70720901     | 1.55920492     | 4.96E-06  | 3.357403  | up        | PREDICTED: myb-related protein Myb4-like [Sesamum indicum]                            |
| c27600.graph_c0 | 3.29282473    | 2.19741466    | 3.12318368    | 23.257331      | 22.8784419     | 25.9641933     | 3.372E-12 | 2.0464    | up        | PREDICTED: 50S ribosomal protein 5, chloroplastic [Sesamum indicum]                   |
| c27601.graph_c0 | 0.83325537    | 1.13739511    | 0.68139664    | 114.37973      | 126.346563     | 139.280031     | 4.27E-160 | 6.145949  | up        | PREDICTED: protein SPIRAL1-like 1-like [Oryza brachyantha]                            |
| c27602.graph_c0 | 7.75799421    | 7.28374981    | 8.21610276    | 2.1687965      | 2.16703277     | 2.43415695     | 3.583E-35 | -2.799694 | down      | hypothetical protein MIMGU_mgv1a002239mg [Erythranthe guttata]                        |

| #ID             | 0 h-1<br>FPKM | 0 h-2<br>FPKM | 0 h-3<br>FPKM | 48 h-1<br>FPKM | 48 h-2<br>FPKM | 48 h-3<br>FPKM | FDR       | log2FC    | regulated | nr_annotation                                                                             |
|-----------------|---------------|---------------|---------------|----------------|----------------|----------------|-----------|-----------|-----------|-------------------------------------------------------------------------------------------|
| c27604.graph_c0 | 1.83039173    | 1.32327332    | 1.43741024    | 10.4611582     | 8.86586292     | 10.4752834     | 7.035E-09 | 1.684485  | up        | PREDICTED: deoxyribodipyrimidine photo-lyase [Sesamum indicum]                            |
| c27606.graph_c0 | 0.09358751    | 0             | 0             | 4.77078022     | 5.63254026     | 5.1400441      | 1.422E-23 | 6.377169  | up        | PREDICTED: rop guanine nucleotide exchange factor 3 [Sesamum indicum]                     |
| c27608.graph_c0 | 33.9924446    | 32.8172496    | 35.4886351    | 13.7568069     | 14.4099198     | 12.7358545     | 1.81E-53  | -2.340523 | down      | PREDICTED: selenoprotein O [Sesamum indicum]                                              |
| c27610.graph_c0 | 0             | 0             | 0             | 1.27816473     | 2.89110225     | 3.25822024     | 1.143E-08 | Inf       | up        | PREDICTED: lecithin-cholesterol acyltransferase-like 1 [Sesamum indicum]                  |
| c27612.graph_c0 | 0.07281783    | 0.07289074    | 0             | 2.41504313     | 2.48737743     | 2.92487922     | 1.811E-09 | 4.744593  | up        | PREDICTED: uncharacterized protein LOC105160557 [Sesamum indicum]                         |
| c27614.graph_c0 | 30.9455574    | 27.0083076    | 33.1645464    | 7.86328486     | 9.75146264     | 10.6774339     | 1.014E-40 | -2.710709 | down      | PREDICTED: uncharacterized protein LOC105163129 [Sesamum indicum]                         |
| c27616.graph_c0 | 0             | 0             | 0.14474571    | 2.23106561     | 2.69334024     | 2.07752312     | 5.605E-10 | 4.544519  | up        | PREDICTED: myb-related protein Zm08-nke [Sesamum indicum]                                 |
| c27618.graph_c0 | 3.83044196    | 4.55772616    | 3.34342838    | 1.53138902     | 2.32767793     | 4.08786224     | 0.0001547 | -1.58829  | down      | -                                                                                         |
| c27622.graph_c0 | 23.4439774    | 24.3941047    | 21.7100697    | 11.8118056     | 14.5008283     | 14.4750653     | 1.02E-33  | -1.790143 | down      | PREDICTED: 1-phosphatidylinositol-3-phosphate 5-kinase FAB1A isoform X2 [Sesamum indicum] |
| c27630.graph_c0 | 0.72589485    | 0.7556866     | 0.52237003    | 0.10699867     | 0.31171832     | 0.14281016     | 3.689E-08 | -2.863615 | down      | -                                                                                         |
| c27631.graph_c0 | 3.67344539    | 4.33245278    | 3.78576578    | 47.4460592     | 51.5057315     | 47.1664118     | 2.895E-52 | 2.613295  | up        | PREDICTED: uncharacterized protein LOC100264843 [Vitis vinifera]                          |
| c27632.graph_c0 | 54.1287191    | 50.2338521    | 56.3110863    | 26.184034      | 24.3853112     | 25.3500458     | 4.256E-46 | -2.098652 | down      | PREDICTED: monothiol glutaredoxin-S16, chloroplastic [Sesamum indicum]                    |
| c27634.graph_c0 | 0             | 0.05385184    | 0.20739756    | 1.58599034     | 1.52264904     | 1.85220613     | 2.683E-07 | 3.205424  | up        | PREDICTED: uncharacterized protein LOC105170116 [Sesamum indicum]                         |
| c27641.graph_c0 | 1.37360702    | 1.85093796    | 1.15412961    | 0.43804259     | 0.82498313     | 0.90945789     | 3.284E-05 | -2.036964 | down      | PREDICTED: heat shock factor protein HSF30-like [Sesamum indicum]                         |
| c27652.graph_c0 | 3.15962805    | 4.99388201    | 3.84654992    | 0.76601459     | 0              | 0.54527614     | 1.709E-12 | -4.187372 | down      | -                                                                                         |
| c27654.graph_c0 | 0.1523414     | 0.26686441    | 0.04894118    | 2.17537593     | 3.67984121     | 4.37079192     | 1.293E-07 | 3.43168   | up        | cytochrome P450 [Verbena x hybrida]                                                       |
| c27656.graph_c0 | 0.17104361    | 0.26905196    | 0.21979781    | 4.1870335      | 4.36411148     | 3.8057176      | 2.349E-13 | 3.209047  | up        | PREDICTED: LOW QUALITY PROTEIN: uncharacterized protein ycf45 [Sesamum indicum]           |
| c27659.graph_c0 | 3.23727108    | 2.27404401    | 1.60562234    | 12.0865087     | 10.919591      | 13.687549      | 4.894E-05 | 1.354838  | up        | PREDICTED: methyltransferase-like protein 13 [Sesamum indicum]                            |
| c27662.graph_c0 | 0.19317134    | 0.12890985    | 0.12411641    | 3.88550448     | 3.80200552     | 3.1933826      | 1.016E-11 | 3.595707  | up        | PREDICTED: MATE efflux family protein 5-like [Sesamum indicum]                            |
| c27665.graph_c0 | 1.04187048    | 1.0846303     | 1.07107585    | 5.33670506     | 5.93830516     | 7.34490745     | 7.244E-05 | 1.520594  | up        | PREDICTED: IAA-amino acid hydrolase ILR1-like 2 [Sesamum indicum]                         |
| c27667.graph_c0 | 75.2251956    | 73.1638146    | 71.5073582    | 66.2508831     | 58.9782008     | 63.8369666     | 2.15E-17  | -1.233262 | down      | PREDICTED: uncharacterized protein LOC105180257 [Sesamum indicum]                         |

| #ID             | 0 h-1<br>FPKM | 0 h-2<br>FPKM | 0 h-3<br>FPKM | 48 h-1<br>FPKM | 48 h-2<br>FPKM | 48 h-3<br>FPKM | FDR       | log2FC    | regulated | nr_annotation                                                                                          |
|-----------------|---------------|---------------|---------------|----------------|----------------|----------------|-----------|-----------|-----------|--------------------------------------------------------------------------------------------------------|
| c27670.graph_c1 | 53.4949168    | 53.789802     | 60.9363003    | 18.8559137     | 19.1285343     | 22.3112191     | 9.28E-55  | -2.500568 | down      | hypothetical protein MIMGU_mgv1a001800mg [Erythranthe guttata]                                         |
| c27672.graph_c0 | 1.19885073    | 1.16368601    | 1.21378294    | 9.50504527     | 11.1685723     | 11.2866362     | 2.346E-12 | 2.138947  | up        | PREDICTED: uncharacterized protein LOC105164990 isoform X1 [Sesamum indicum]                           |
| c27675.graph_c0 | 41.2079142    | 43.5771737    | 47.2568315    | 16.537856      | 19.2931176     | 20.7920421     | 1.656E-40 | -2.243695 | down      | PREDICTED: DNL-type zinc finger protein-like [Sesamum indicum]                                         |
| c27682.graph_c0 | 1.21841638    | 1.55226456    | 1.20986936    | 0.3571542      | 0.43241322     | 0.13619728     | 4.225E-09 | -3.117902 | down      | PREDICTED: ammonium transporter 3 member 1-like [Solanum tuberosum]                                    |
| c27685.graph_c0 | 20.9534597    | 22.9118396    | 18.4913668    | 23.8001365     | 18.1503331     | 16.6934425     | 4.469E-08 | -1.098141 | down      | PREDICTED: probable WRKY transcription factor 65 [Sesamum indicum]                                     |
| c27686.graph_c0 | 1.20948591    | 1.41247987    | 1.46789076    | 0.06190318     | 0              | 0              | 3.531E-17 | -7.007732 | down      | -                                                                                                      |
| c27688.graph_c0 | 0.10753606    | 0.03588125    | 0.18425079    | 20.1110536     | 33.3396998     | 35.2310981     | 1.396E-28 | 7.043447  | up        | PREDICTED: allene oxide cyclase 4, chloroplastic-like [Pyrus x bretschneideri]                         |
| c27692.graph_c0 | 1.12071689    | 0.85105037    | 0.74491323    | 13.7070289     | 12.0693486     | 10.0422569     | 4.995E-16 | 2.710738  | up        | PREDICTED: uncharacterized protein LOC105172843 [Sesamum indicum]                                      |
| c27693.graph_c0 | 3.25245818    | 3.47769559    | 3.46711636    | 19.7828956     | 23.8433043     | 26.6918762     | 2.987E-18 | 1.763555  | up        | PREDICTED: uncharacterized protein LOC105170243 [Sesamum indicum]                                      |
| c27694.graph_c0 | 1.73179554    | 0.95344132    | 1.66906938    | 0              | 0              | 0              | 1.389E-19 | -Inf      | down      | hypothetical protein V501_06377 [Pseudogymnoascus pannorum VKM F-4519 (FW-2642)]                       |
| c27696.graph_c0 | 10.579298     | 10.1759544    | 9.96362789    | 3.9683792      | 4.1367523      | 4.57622777     | 3.274E-27 | -2.294906 | down      | hypothetical protein MIMGU_mgv1a008679mg [Erythranthe guttata]                                         |
| c27698.graph_c0 | 0.03000741    | 0.09011236    | 0             | 3.67675568     | 3.86579052     | 3.71432195     | 7.06E-18  | 5.5462    | up        | hypothetical protein MIMGU_mgv1a004055mg [Erythranthe guttata]                                         |
| c27705.graph_c0 | 0             | 0             | 0.14040454    | 13.9914946     | 16.8483606     | 23.7347493     | 5.664E-20 | 7.546655  | up        | hypothetical protein MIMGU_mgv1a024655mg [Erythranthe guttata]                                         |
| c27710.graph_c0 | 0.28420376    | 0.22759068    | 0.29217047    | 8.90211935     | 16.64244       | 26.0928781     | 1.729E-06 | 4.973537  | up        | PREDICTED: glucan endo-1,3-beta-glucosidase 4-like [Nicotiana glauca]                                  |
| c27714.graph_c0 | 1.04243035    | 0.72049408    | 0.82925407    | 6.76821499     | 9.6893285      | 9.46073447     | 1.338E-15 | 2.299201  | up        | PREDICTED: pentatricopeptide repeat-containing protein At3g62470, mitochondrial-like [Sesamum indicum] |
| c27717.graph_c0 | 14.520095     | 12.5935271    | 10.8792917    | 10.980353      | 10.1090683     | 10.9333773     | 2.621E-10 | -1.260506 | down      | PREDICTED: uncharacterized protein LOC105170997 [Sesamum indicum]                                      |
| c27723.graph_c0 | 101.139013    | 90.7827489    | 99.2717622    | 392.784874     | 409.604538     | 422.776392     | 9E-14     | 1.054259  | up        | PREDICTED: 40S ribosomal protein S5 [Sesamum indicum]                                                  |
| c27725.graph_c0 | 5.76024151    | 5.59388984    | 7.18117905    | 42.0576584     | 46.0653279     | 49.5444897     | 1.299E-17 | 1.870525  | up        | PREDICTED: 40S ribosomal protein S13-like [Sesamum indicum]                                            |
| c27727.graph_c0 | 27.3597056    | 31.0483826    | 25.2925727    | 12.8279711     | 14.4379304     | 15.525757      | 5.89E-44  | -1.986784 | down      | PREDICTED: autopnagylated protein 9 [Sesamum indicum]                                                  |
| c27733.graph_c0 | 0.79409193    | 0.67259677    | 0.74570584    | 0.33764736     | 0.20865625     | 0.25036383     | 1.446E-06 | -2.482712 | down      | -                                                                                                      |
| c27737.graph_c0 | 5.23289862    | 6.26859207    | 4.96068337    | 4.50476376     | 5.77693538     | 5.55537937     | 0.0043657 | -1.076344 | down      | PREDICTED: uncharacterized protein LOC105168421 isoform X1 [Sesamum indicum]                           |

| #ID             | 0 h-1<br>FPKM | 0 h-2<br>FPKM | 0 h-3<br>FPKM | 48 h-1<br>FPKM | 48 h-2<br>FPKM | 48 h-3<br>FPKM | FDR       | log2FC    | regulated | nr_annotation                                                                                    |
|-----------------|---------------|---------------|---------------|----------------|----------------|----------------|-----------|-----------|-----------|--------------------------------------------------------------------------------------------------|
| c27738.graph_c0 | 0.09489607    | 0.04749555    | 0.0609726     | 2.53530895     | 3.93616301     | 5.05633354     | 3.688E-10 | 4.800887  | up        | PREDICTED: protein CHUP1, chloroplastic isoform X1 [Sesamum indicum]                             |
| c27740.graph_c0 | 3.33067998    | 3.6515404     | 3.26099477    | 0.43834852     | 0.15479237     | 0              | 7.957E-15 | -5.093463 | down      | PREDICTED: uncharacterized protein LOC103423918 [Malus domestica]                                |
| c27741.graph_c0 | 0.78114804    | 0.54735117    | 0.90342554    | 7.05251636     | 11.2069289     | 18.5056922     | 0.0002618 | 3.010307  | up        | PREDICTED: transcription factor 1CF4-like [Sesamum indicum]                                      |
| c27744.graph_c0 | 1.59169862    | 1.49672928    | 1.30161547    | 0.13330696     | 0.32951931     | 0.39538578     | 2.553E-10 | -3.385502 | down      | -                                                                                                |
| c27745.graph_c1 | 6.9930733     | 7.36635884    | 6.47855018    | 41.8760891     | 45.9498529     | 45.6931641     | 5.482E-23 | 1.661631  | up        | PREDICTED: equilibrative nucleotide transporter 1 [Sesamum indicum]                              |
| c27749.graph_c0 | 1.38113785    | 1.6671575     | 1.40941336    | 6.324548       | 7.73087506     | 8.92415386     | 9.061E-05 | 1.344324  | up        | PREDICTED: tRNA (adenine(58)-N(1))-methyltransferase catalytic subunit trmt61a [Sesamum indicum] |
| c27751.graph_c0 | 26.0567852    | 30.0224784    | 17.9627712    | 20.0043418     | 29.2716909     | 22.9171691     | 0.0005147 | -1.055113 | down      | PREDICTED: probable glutathione S-transferase [Sesamum indicum]                                  |
| c27752.graph_c0 | 0.72781003    | 1.11304542    | 0.88330555    | 3.96716091     | 6.49153444     | 5.43580067     | 1.976E-06 | 1.519285  | up        | PREDICTED: CSC1-like protein Atg52090 [Sesamum indicum]                                          |
| c27754.graph_c0 | 104.926041    | 103.51742     | 102.236858    | 36.0120026     | 36.6191707     | 37.3114982     | 4.785E-63 | -2.51633  | down      | PREDICTED: topless-related protein 4 [Sesamum indicum]                                           |
| c27755.graph_c0 | 0.13297161    | 0.15211973    | 0.29292649    | 1.03251788     | 1.61293207     | 1.52602311     | 0.0001317 | 1.817659  | up        | PREDICTED: glutamate receptor 5.2-like [Sesamum indicum]                                         |
| c27760.graph_c0 | 11.6993865    | 11.7935742    | 9.31695343    | 1.8975771      | 5.30706751     | 2.5664481      | 5.133E-18 | -2.776385 | down      | PREDICTED: uncharacterized protein LOC105179312 [Sesamum indicum]                                |
| c27765.graph_c0 | 40.4608418    | 41.8292706    | 40.9131412    | 14.2073381     | 8.73926243     | 5.8450427      | 6.381E-36 | -3.101389 | down      | PREDICTED: polyubiquitin 4-like [Cicer arietinum]                                                |
| c27772.graph_c0 | 1.51363599    | 1.59705176    | 1.73480302    | 5.05020722     | 7.74564137     | 7.8471097      | 0.0020267 | 1.064489  | up        | PREDICTED: uncharacterized protein At2g39795, mitochondrial isoform X1 [Sesamum indicum]         |
| c27774.graph_c0 | 0.39431181    | 0             | 0             | 5.93334068     | 2.95040949     | 2.58585348     | 0.0021482 | 3.882021  | up        | PREDICTED: transmembrane protein 56 isoform X2 [Sesamum indicum]                                 |
| c27778.graph_c0 | 0.29460773    | 0.15612498    | 0.26723477    | 2.74604936     | 3.70403654     | 2.62809517     | 7.714E-11 | 2.638616  | up        | PREDICTED: phosphoenolpyruvate carboxylase 4 [Sesamum indicum]                                   |
| c27779.graph_c0 | 1.39791127    | 2.13579058    | 1.41818789    | 19.3177057     | 22.9779837     | 21.1693375     | 6.316E-16 | 2.661403  | up        | PREDICTED: transcription factor BEE 1-like [Sesamum indicum]                                     |
| c27785.graph_c0 | 5.04004086    | 4.71426228    | 6.05195356    | 51.303713      | 51.2858161     | 53.8450142     | 1.189E-26 | 2.286866  | up        | hypothetical protein MIMGU_mgv1a013628mg [Erythranthe guttata]                                   |
| c27785.graph_c1 | 12.4363384    | 14.1367632    | 15.1685845    | 159.429379     | 147.089778     | 147.734109     | 4.189E-32 | 2.426398  | up        | PREDICTED: polyadenylate-binding protein 2 isoform X1 [Sesamum indicum]                          |
| c27788.graph_c0 | 2.1744026     | 2.53934326    | 2.9494264     | 0.11128897     | 0              | 0.19804852     | 2.652E-15 | -5.644838 | down      | -                                                                                                |
| c27790.graph_c0 | 3.45263063    | 4.63262849    | 3.87037126    | 39.5229895     | 46.7450674     | 51.6068353     | 6.677E-30 | 2.506312  | up        | PREDICTED: nucleoside diphosphate kinase 2, chloroplastic [Sesamum indicum]                      |
| c27793.graph_c0 | 1.47155985    | 1.09113585    | 0.98052509    | 0.55232097     | 0.53192463     | 0.49145187     | 1.408E-05 | -2.181835 | down      | -                                                                                                |
| c27795.graph_c0 | 0.39619688    | 0.0991484     | 0.25456434    | 3.92377593     | 3.86675797     | 6.17076208     | 2.033E-07 | 3.199131  | up        | PREDICTED: exonuclease DPD1, chloroplastic/mitochondrial [Sesamum indicum]                       |

| #ID             | 0 h-1<br>FPKM | 0 h-2<br>FPKM | 0 h-3<br>FPKM | 48 h-1<br>FPKM | 48 h-2<br>FPKM | 48 h-3<br>FPKM | FDR       | log2FC    | regulated | nr_annotation                                                                          |
|-----------------|---------------|---------------|---------------|----------------|----------------|----------------|-----------|-----------|-----------|----------------------------------------------------------------------------------------|
| c27795.graph_c1 | 0.60917852    | 0.99090635    | 0.39140926    | 6.59427614     | 7.65469261     | 7.240803       | 1.27E-06  | 2.417718  | up        | PREDICTED: exonuclease DPD1, chloroplastic/mitochondrial [Sesamum indicum]             |
| c27796.graph_c0 | 2.21699923    | 3.00668411    | 2.29752564    | 52.5105841     | 48.7186454     | 54.1102693     | 5.616E-49 | 3.352387  | up        | unnamed protein product [Coffea canephora]                                             |
| c27798.graph_c0 | 23.9436946    | 22.5806526    | 21.6163628    | 6.51031916     | 7.43782658     | 9.54115291     | 5.513E-58 | -2.55743  | down      | PREDICTED: uncharacterized protein LOC105164093 [Sesamum indicum]                      |
| c27800.graph_c0 | 0             | 0             | 0             | 2.96870328     | 2.40011719     | 4.86598428     | 3.318E-08 | Inf       | up        | PREDICTED: transcription factor bHLH130-like [Sesamum indicum]                         |
| c27801.graph_c0 | 0.77136419    | 0.66684524    | 0.49561676    | 18.9932287     | 23.6798431     | 24.2579102     | 9.918E-55 | 4.0955    | up        | PREDICTED: chorismate mutase 1, chloroplastic-like [Sesamum indicum]                   |
| c27803.graph_c0 | 2.39313581    | 1.75998282    | 2.44766727    | 2.33969522     | 2.33562588     | 0.96085234     | 0.0037922 | -1.241013 | down      | hypothetical protein MIMGU_mgv1a020303mg [Erythranthe guttata]                         |
| c27807.graph_c0 | 0.53456058    | 1.60528759    | 0.68693151    | 114.581836     | 142.949758     | 178.638999     | 6.842E-38 | 6.249119  | up        | hypothetical protein MIMGU_mgv1a0223741mg, partial [Erythranthe guttata]               |
| c27818.graph_c0 | 0             | 0             | 0             | 20.1353695     | 27.3291497     | 24.1823233     | 6.157E-89 | Inf       | up        | hypothetical protein MIMGU_mgv1a023677mg [Erythranthe guttata]                         |
| c27824.graph_c0 | 3.13417841    | 3.64009194    | 2.94320475    | 18.9162345     | 24.059113      | 24.7203123     | 9.942E-26 | 1.77959   | up        | PREDICTED: LOW QUALITY PROTEIN: uncharacterized protein LOC105170443 [Sesamum indicum] |
| c27825.graph_c0 | 1.17831881    | 0.8256491     | 1.58989564    | 141.880619     | 153.81282      | 178.934948     | 1.69E-139 | 6.020116  | up        | PREDICTED: 2-Cys peroxiredoxin BAS1, chloroplastic-like [Sesamum indicum]              |
| c27827.graph_c0 | 0             | 0             | 0             | 2.71497051     | 1.30735548     | 1.18592072     | 5.669E-05 | Inf       | up        | PREDICTED: cyclin-D5-3-like [Sesamum indicum]                                          |
| c27828.graph_c0 | 55.422358     | 49.2035739    | 44.5972383    | 27.656791      | 32.0679346     | 33.9115311     | 2.595E-28 | -1.691055 | down      | hypothetical protein MIMGU_mgv1a024518mg [Erythranthe guttata]                         |
| c27833.graph_c0 | 1.49385644    | 1.07665366    | 1.07501222    | 10.8998049     | 11.6636582     | 11.9517865     | 3.383E-09 | 2.226577  | up        | PREDICTED: uncharacterized protein LOC105175923 [Sesamum indicum]                      |
| c27839.graph_c0 | 14.6785035    | 14.7674099    | 13.4323566    | 8.19563323     | 9.47815527     | 9.05476125     | 6.44E-12  | -1.700728 | down      | -                                                                                      |
| c27841.graph_c0 | 1.95382384    | 2.1335785     | 2.47269945    | 13.609015      | 14.5037771     | 13.6865729     | 4.107E-13 | 1.651213  | up        | PREDICTED: uncharacterized protein LOC105159050 [Sesamum indicum]                      |
| c27846.graph_c0 | 0.047995      | 0.14412917    | 0.18502642    | 32.2777698     | 33.2107092     | 22.58302       | 1.678E-34 | 6.843248  | up        | PREDICTED: lignin-forming anionic peroxidase-like [Sesamum indicum]                    |
| c27850.graph_c0 | 0.04795551    | 0.33602472    | 0.18487419    | 3.31348089     | 3.65064047     | 3.1841806      | 3.521E-08 | 3.136763  | up        | PREDICTED: protein COBRA-like [Sesamum indicum]                                        |
| c27852.graph_c0 | 2.67230775    | 2.07447712    | 2.10246199    | 14.4197246     | 13.0936712     | 13.9482309     | 3.014E-07 | 1.58344   | up        | PREDICTED: uncharacterized protein LOC105168786 [Sesamum indicum]                      |
| c27858.graph_c0 | 0.29546901    | 0.39435318    | 0.50625251    | 10.6462528     | 19.352733      | 18.8382961     | 6.609E-15 | 4.319213  | up        | hypothetical protein MIMGU_mgv1a026536mg, partial [Erythranthe guttata]                |
| c27862.graph_c0 | 2.91723347    | 2.27123139    | 3.60991753    | 0              | 0              | 0.17713793     | 8.63E-18  | -6.678613 | down      | PREDICTED: ethylene-responsive transcription factor ERF109-like [Sesamum indicum]      |



| #ID             | 0 h-1<br>FPKM | 0 h-2<br>FPKM | 0 h-3<br>FPKM | 48 h-1<br>FPKM | 48 h-2<br>FPKM | 48 h-3<br>FPKM | FDR       | log2FC    | regulated | nr_annotation                                                                             |
|-----------------|---------------|---------------|---------------|----------------|----------------|----------------|-----------|-----------|-----------|-------------------------------------------------------------------------------------------|
| c27868.graph_c0 | 1.43253145    | 1.28141635    | 1.33168569    | 5.08240842     | 5.97913417     | 9.21948834     | 0.0016505 | 1.302355  | up        | PREDICTED: F-box/kelch-repeat protein At3g27150-like [Sesamum indicum]                    |
| c27869.graph_c0 | 34.8237735    | 33.6503089    | 36.3358131    | 33.4636114     | 32.1661887     | 33.0441527     | 5.89E-14  | -1.104493 | down      | hypothetical protein MIMGU_mgv1a009154mg [Erythranthe guttata]                            |
| c27870.graph_c0 | 8.45255533    | 10.0579666    | 9.53110955    | 608.472499     | 514.687963     | 562.500031     | 5.557E-97 | 4.894168  | up        | PREDICTED: asparagine synthetase [glutamine-hydrolyzing] [Solanum lycopersicum]           |
| c27877.graph_c0 | 0.7519986     | 0.37637581    | 0.48317399    | 4.75056109     | 3.93175268     | 4.79942974     | 2.86E-05  | 2.051868  | up        | PREDICTED: KINU-HZ finger protein A1L5 [Sesamum indicum]                                  |
| c27879.graph_c0 | 3.57069196    | 3.06365783    | 3.47413527    | 26.4574156     | 27.431015      | 23.45802       | 5.719E-17 | 1.918547  | up        | PREDICTED: hsp70 nucleotide exchange factor FES1 [Sesamum indicum]                        |
| c27879.graph_c1 | 2.20511295    | 2.0601663     | 2.83365745    | 22.7527315     | 21.0907901     | 15.5454549     | 8.969E-07 | 2.047766  | up        | -                                                                                         |
| c27884.graph_c0 | 29.0378283    | 28.6356455    | 30.2282765    | 6.9855657      | 1.93418495     | 0.91823053     | 5.843E-72 | -4.145432 | down      | hypothetical protein CICLE_v1001/525mg [Citrus sinensis]                                  |
| c27885.graph_c0 | 0.58582963    | 0.39094416    | 0.15056285    | 2.69852232     | 3.23992481     | 6.21092017     | 0.0030347 | 2.414855  | up        | PREDICTED: cytochrome P450 81E8-like isoform X1 [Sesamum indicum]                         |
| c27887.graph_c0 | 46.0270315    | 43.2362351    | 38.1046808    | 25.3354917     | 33.9596209     | 38.2893085     | 6.644E-21 | -1.406098 | down      | PREDICTED: E3 ubiquitin-protein ligase RMA1H1-like [Sesamum indicum]                      |
| c27888.graph_c1 | 7.2733907     | 7.48535148    | 8.07035312    | 31.2969462     | 30.874644      | 30.3859862     | 3.416E-10 | 1.001416  | up        | PREDICTED: aspartokinase 2, chloroplastic [Sesamum indicum]                               |
| c27892.graph_c0 | 0.43598431    | 0.08728418    | 0.22410284    | 10.6037495     | 11.6588939     | 10.7932427     | 1.825E-15 | 4.452145  | up        | PREDICTED: transcription factor MYB86-like [Sesamum indicum]                              |
| c27892.graph_c1 | 0.18460913    | 0             | 0             | 5.69747795     | 8.01768726     | 8.3988591      | 2.548E-14 | 5.901714  | up        | -                                                                                         |
| c27896.graph_c0 | 8.03810346    | 9.25392581    | 7.59955572    | 3.85134334     | 5.60589662     | 5.976183       | 7.295E-24 | -1.713061 | down      | PREDICTED: U-box domain-containing protein 44 [Sesamum indicum]                           |
| c27898.graph_c0 | 16.7651894    | 16.5227961    | 19.9634893    | 9.66069551     | 12.1927577     | 11.4083098     | 1.045E-15 | -1.70228  | down      | PREDICTED: uncharacterized protein At2g34460, chloroplastic [Sesamum indicum]             |
| c27905.graph_c0 | 13.3845651    | 12.7640854    | 13.0939622    | 8.72432604     | 8.98953489     | 8.98980831     | 7.687E-20 | -1.573317 | down      | PREDICTED: transcription factor KR20-like [Sesamum indicum]                               |
| c27907.graph_c0 | 0.49605815    | 0.16551829    | 0.84993914    | 6.55034938     | 9.03722908     | 7.04837203     | 9.78E-07  | 2.872588  | up        | PREDICTED: protein RER1A-like [Sesamum indicum]                                           |
| c27908.graph_c0 | 8.67355296    | 8.84814085    | 7.09927321    | 52.2191046     | 60.3880961     | 65.1676891     | 1.667E-26 | 1.833555  | up        | PREDICTED: vacuolar protein sorting-associated protein 29 [Sesamum indicum]               |
| c27911.graph_c0 | 0.03671785    | 0             | 0             | 3.04441907     | 4.98113118     | 3.25068694     | 2.975E-16 | 7.260042  | up        | PREDICTED: protein NRT1/ PTR FAMILY 6.3-like [Sesamum indicum]                            |
| c27912.graph_c0 | 5.54443239    | 5.97944737    | 5.04674405    | 3.19243297     | 4.38048958     | 4.43675863     | 9.532E-09 | -1.486432 | down      | PREDICTED: uncharacterized protein LOC105168751 [Sesamum indicum]                         |
| c27913.graph_c0 | 1.4030446     | 1.40444954    | 1.54540102    | 10.7099171     | 13.8888957     | 14.4587335     | 5.458E-07 | 2.141985  | up        | hypothetical protein OsI_11409 [Oryza sativa Indica Group]                                |
| c27915.graph_c0 | 6.10573662    | 7.95961938    | 7.4811778     | 47.2238609     | 50.9980256     | 53.0772726     | 2.115E-11 | 1.791598  | up        | PREDICTED: mitochondrial import inner membrane translocase subunit TIM8 [Sesamum indicum] |
| c27916.graph_c0 | 0.41521602    | 0.23090655    | 0.35571268    | 9.26558319     | 9.27544471     | 13.3877932     | 7.704E-19 | 3.973514  | up        | PREDICTED: uncharacterized protein LOC105157022 [Sesamum indicum]                         |

| #ID             | 0 h-1<br>FPKM | 0 h-2<br>FPKM | 0 h-3<br>FPKM | 48 h-1<br>FPKM | 48 h-2<br>FPKM | 48 h-3<br>FPKM | FDR       | log2FC    | regulated | nr_annotation                                                                          |
|-----------------|---------------|---------------|---------------|----------------|----------------|----------------|-----------|-----------|-----------|----------------------------------------------------------------------------------------|
| c27918.graph_c0 | 2.73976431    | 2.87520976    | 2.10106625    | 16.976269      | 12.5501939     | 11.2294207     | 0.0002117 | 1.393643  | up        | PREDICTED: G-box-binding factor 4-like [Sesamum indicum]                               |
| c27920.graph_c0 | 4.39591329    | 4.25943876    | 3.99999041    | 23.4751237     | 25.5638938     | 26.2355752     | 6.265E-28 | 1.554079  | up        | PREDICTED: LOW QUALITY PROTEIN: uncharacterized protein LOC105171130 [Sesamum indicum] |
| c27923.graph_c0 | 0.97241116    | 1.36994909    | 1.57355379    | 71.3692705     | 100.633702     | 107.138924     | 4.759E-44 | 5.127584  | up        | PREDICTED: protein disulfide isomerase-like 2-3 [Sesamum indicum]                      |
| c27926.graph_c0 | 27.8504317    | 31.1866645    | 26.7850525    | 13.1941948     | 18.7945626     | 16.833519      | 1.227E-30 | -1.836118 | down      | PREDICTED: UPF0392 protein RCOM_0530710 [Sesamum indicum]                              |
| c27934.graph_c0 | 1.70236905    | 1.57784603    | 1.45840775    | 0              | 0.55381969     | 0.51684949     | 3.846E-09 | -3.191594 | down      | PREDICTED: ADP,ATP carrier protein 1, mitochondrial-like [Malus domestica]             |
| c27935.graph_c0 | 28.4094746    | 31.453245     | 28.1395948    | 8.29216372     | 8.46766472     | 8.01412432     | 2.746E-83 | -2.845614 | down      | PREDICTED: DNA ligase 1-like [Sesamum indicum]                                         |
| c27941.graph_c0 | 9.59838261    | 9.97753216    | 9.07282767    | 3.31599604     | 3.37778435     | 4.16103676     | 5.463E-21 | -2.418807 | down      | hypothetical protein JCGZ_04255 [Jatropha curcas]                                      |
| c27942.graph_c0 | 0.23949333    | 0.29966643    | 0             | 18.2025424     | 16.4785303     | 17.2272        | 4.036E-34 | 5.589247  | up        | PREDICTED: 1-aminocyclopropane-1-carboxylate oxidase [Sesamum indicum]                 |
| c27943.graph_c0 | 8.94174521    | 7.78022299    | 10.4298354    | 5.89313737     | 9.06251294     | 9.30330003     | 4.717E-05 | -1.190096 | down      | PREDICTED: LOW QUALITY PROTEIN: auxilin-related protein 2-like [Sesamum indicum]       |
| c27945.graph_c0 | 10.1704569    | 7.15169003    | 10.0451066    | 5.03330363     | 8.77758018     | 7.16576528     | 1.118E-05 | -1.410842 | down      | PREDICTED: uncharacterized protein LOC105169359 [Sesamum indicum]                      |
| c27946.graph_c0 | 1.59187668    | 1.53852343    | 2.11616333    | 0.70798513     | 0.80359757     | 0.22498604     | 2.161E-07 | -2.611394 | down      | PREDICTED: putative germin-like protein 2-1 [Sesamum indicum]                          |
| c27947.graph_c0 | 1.77093816    | 1.64300089    | 1.22112108    | 0              | 0              | 0              | 2.237E-23 | -Inf      | down      | -                                                                                      |
| c27949.graph_c0 | 5.61574579    | 6.50895371    | 6.4025697     | 0.38899183     | 0.2472538      | 0.20767355     | 7.981E-44 | -5.463819 | down      | PREDICTED: uncharacterized protein LOC105156723 [Sesamum indicum]                      |
| c27952.graph_c0 | 0             | 0.06881418    | 0             | 1.66776085     | 1.67733265     | 2.29169058     | 9.582E-14 | 5.347665  | up        | PREDICTED: uncharacterized protein LOC105176065 [Sesamum indicum]                      |
| c27954.graph_c0 | 2.38106559    | 3.85018825    | 2.11829785    | 0.50621375     | 1.78757363     | 3.00283969     | 0.0037303 | -1.69051  | down      | PREDICTED: probable polyamine transporter At3g13620 [Sesamum indicum]                  |
| c27954.graph_c1 | 3.6205255     | 2.83342707    | 4.22956237    | 0.90967206     | 2.12011195     | 3.50748984     | 7.905E-05 | -1.74457  | down      | PREDICTED: probable polyamine transporter At3g13620 [Sesamum indicum]                  |
| c27955.graph_c0 | 0.0774356     | 0.07751314    | 0             | 7.24088055     | 8.80445587     | 12.3462314     | 3.25E-20  | 6.510481  | up        | hypothetical protein MIMGU_mgv1a005882mg [Erythranthe guttata]                         |
| c27956.graph_c0 | 0.80611286    | 1.07589342    | 1.43051054    | 5.905786       | 7.2679883      | 8.24426594     | 1.671E-06 | 1.665417  | up        | PREDICTED: surfeit locus protein 1 [Sesamum indicum]                                   |
| c27958.graph_c0 | 110.868602    | 106.039489    | 112.652421    | 117.613844     | 104.486226     | 99.3999684     | 1.244E-13 | -1.050744 | down      | PREDICTED: peptide methionine sulfoxide reductase B5-like [Sesamum indicum]            |
| c27959.graph_c0 | 0.20719884    | 0.24197403    | 0.1775058     | 2.60876278     | 2.29182211     | 2.66095823     | 1.369E-06 | 2.578974  | up        | PREDICTED: uncharacterized protein LOC105161116 [Sesamum indicum]                      |
| c27961.graph_c0 | 1.65015259    | 1.82184372    | 1.30972764    | 8.92016253     | 12.8129282     | 13.0494791     | 6.318E-12 | 1.841415  | up        | hypothetical protein MIMGU_mgv1a003065mg [Erythranthe guttata]                         |

| #ID             | 0 h-1<br>FPKM | 0 h-2<br>FPKM | 0 h-3<br>FPKM | 48 h-1<br>FPKM | 48 h-2<br>FPKM | 48 h-3<br>FPKM | FDR       | log2FC    | regulated | nr_annotation                                                                                                   |
|-----------------|---------------|---------------|---------------|----------------|----------------|----------------|-----------|-----------|-----------|-----------------------------------------------------------------------------------------------------------------|
| c27962.graph_c0 | 4.91038074    | 4.05827147    | 4.62735802    | 25.9594401     | 31.850884      | 36.5778705     | 1.052E-16 | 1.773155  | up        | PREDICTED: ent-kaurene oxidase, chloroplastic-like [Sesamum indicum]                                            |
| c27967.graph_c0 | 1.50655594    | 1.37692848    | 0.9048621     | 6.68322127     | 7.94309501     | 10.0946071     | 1.853E-08 | 1.688496  | up        | PREDICTED: LOW QUALITY PROTEIN: alpha,alpha-trehalose-phosphate synthase [UDP-forming] 1-like [Sesamum indicum] |
| c27969.graph_c0 | 0.16026793    | 0.06417137    | 0.24714077    | 9.24284452     | 4.34837875     | 4.96606707     | 9.065E-06 | 4.28704   | up        | PREDICTED: S-type anion channel SLAH2-like [Sesamum indicum]                                                    |
| c27970.graph_c0 | 2.57657718    | 2.26334206    | 2.36500263    | 38.1731475     | 30.5351441     | 24.9574255     | 1.449E-10 | 2.68963   | up        | Os05g0129800 [Oryza sativa Japonica Group]                                                                      |
| c27971.graph_c0 | 1.05507385    | 0.49700252    | 0.55827539    | 6.4609601      | 8.23775323     | 11.9048503     | 8.373E-07 | 2.636184  | up        | PREDICTED: EH domain-containing protein 1-like [Sesamum indicum]                                                |
| c27974.graph_c0 | 105.560633    | 101.232028    | 88.4429794    | 1010.41766     | 848.971641     | 653.550391     | 3.406E-08 | 2.079295  | up        | -                                                                                                               |
| c27976.graph_c0 | 0             | 0             | 0             | 7.58896304     | 7.79410259     | 10.3093339     | 1.692E-23 | Inf       | up        | PREDICTED: homeobox-leucine zipper protein ATHB-40-like [Sesamum indicum]                                       |
| c27977.graph_c0 | 0             | 0.06401401    | 0             | 3.77055297     | 5.18029413     | 6.13338745     | 3.276E-15 | 6.867791  | up        | PREDICTED: pyruvate kinase, cytosolic isozyme-like [Sesamum indicum]                                            |
| c27977.graph_c1 | 0             | 0             | 0             | 3.90122406     | 7.00058222     | 6.16330319     | 5.561E-15 | Inf       | up        | Pyruvate kinase, cytosolic isozyme [Glycine soja]                                                               |
| c27983.graph_c0 | 8.96596812    | 8.00468172    | 4.67092865    | 4.91137194     | 5.91250346     | 3.17826125     | 0.0003354 | -1.639184 | down      | -                                                                                                               |
| c27986.graph_c0 | 3.8487797     | 3.92601717    | 3.29722287    | 2.87036654     | 2.53996678     | 4.2967881      | 0.000169  | -1.207735 | down      | -                                                                                                               |
| c27987.graph_c0 | 0.75989639    | 0.82404542    | 1.22062118    | 9.91760332     | 12.8550095     | 11.004825      | 8.893E-11 | 2.563894  | up        | PREDICTED: uncharacterized protein LOC105171687 [Sesamum indicum]                                               |
| c27988.graph_c0 | 6.72300873    | 9.51680518    | 6.02135288    | 302.801847     | 564.28442      | 671.796794     | 1.159E-12 | 5.084731  | up        | -                                                                                                               |
| c27993.graph_c0 | 10.5415026    | 10.5018104    | 10.9660104    | 6.47434651     | 6.41786318     | 9.58767472     | 1.018E-10 | -1.530861 | down      | PREDICTED: protein ECERIFERUM 1 [Sesamum indicum]                                                               |
| c27997.graph_c0 | 2.78044175    | 2.27718486    | 2.31431512    | 16.533475      | 18.2244547     | 16.9129145     | 2.424E-16 | 1.791785  | up        | PREDICTED: probable lysine--tRNA ligase, cytoplasmic [Sesamum indicum]                                          |
| c27998.graph_c0 | 1.24868964    | 1.11105779    | 0.93602578    | 8.97931086     | 9.71560475     | 9.43983139     | 6.595E-11 | 2.077582  | up        | PREDICTED: pectinesterase 2.1-like [Sesamum indicum]                                                            |
| c28000.graph_c0 | 435.520406    | 440.309382    | 438.873921    | 416.175769     | 398.937317     | 350.568105     | 3.56E-17  | -1.189194 | down      | PREDICTED: uncharacterized protein LOC105170296 [Sesamum indicum]                                               |
| c28000.graph_c1 | 26.4632623    | 32.5866111    | 19.4321942    | 10.6419253     | 11.0688507     | 10.8464478     | 1.306E-09 | -2.283551 | down      | PREDICTED: probable membrane-associated kinase regulator 1 [Sesamum indicum]                                    |
| c28001.graph_c0 | 0             | 0             | 0             | 1.32350315     | 2.24334576     | 2.060879       | 1.596E-11 | Inf       | up        | ADP-ribosylation factor [Hyacinthus orientalis]                                                                 |
| c28005.graph_c0 | 24.0958689    | 25.097835     | 24.5481514    | 25.9651298     | 22.8106055     | 23.548487      | 8.522E-12 | -1.043162 | down      | PREDICTED: transcription initiation factor IIA large subunit-like [Sesamum indicum]                             |
| c28007.graph_c0 | 0             | 0             | 0.23462916    | 3.13990798     | 4.39553627     | 3.44244849     | 3.034E-11 | 4.493587  | up        | PREDICTED: purple acid phosphatase 17-like [Sesamum indicum]                                                    |
| c28009.graph_c0 | 2.28776084    | 1.55723514    | 2.23429607    | 11.7184478     | 14.7363691     | 18.0784753     | 1.235E-06 | 1.848681  | up        | hypothetical protein MIMGU_mgv1a006302mg [Erythranthe guttata]                                                  |

| #ID             | 0 h-1<br>FPKM | 0 h-2<br>FPKM | 0 h-3<br>FPKM | 48 h-1<br>FPKM | 48 h-2<br>FPKM | 48 h-3<br>FPKM | FDR       | log2FC    | regulated | nr_annotation                                                                               |
|-----------------|---------------|---------------|---------------|----------------|----------------|----------------|-----------|-----------|-----------|---------------------------------------------------------------------------------------------|
| c28010.graph_c0 | 26.4577206    | 25.4793929    | 27.9794833    | 16.6680718     | 14.9986341     | 15.4385023     | 1.569E-33 | -1.778945 | down      | PREDICTED: uncharacterized protein LOC105174992 [Sesamum indicum]                           |
| c28013.graph_c0 | 171.941286    | 160.79534     | 163.834681    | 636.667238     | 694.35391      | 717.676596     | 4.686E-13 | 1.025589  | up        | PREDICTED: 60S ribosomal protein L21-1 [Sesamum indicum]                                    |
| c28016.graph_c0 | 2.44136654    | 3.3043081     | 1.8558396     | 1.29880267     | 1.34236482     | 0.76104887     | 6.866E-07 | -2.170143 | down      | PREDICTED: uncharacterized protein LOC105177164 [Sesamum indicum]                           |
| c28020.graph_c0 | 6.06145057    | 6.31416736    | 7.66255025    | 2.04300133     | 1.97192887     | 1.97943699     | 2.218E-17 | -2.760296 | down      | PREDICTED: very-long-chain 3-oxoacyl-CoA reductase-like protein At1g24470 [Sesamum indicum] |
| c28022.graph_c0 | 3.58059824    | 3.80362348    | 3.94389471    | 23.6293246     | 22.251026      | 23.6608724     | 6.187E-09 | 1.600406  | up        | PREDICTED: uncharacterized protein LOC105178683 [Sesamum indicum]                           |
| c28025.graph_c0 | 81.2593957    | 89.3854557    | 79.5592691    | 24.2225711     | 14.4281912     | 12.5251966     | 3.854E-90 | -3.294423 | down      | PREDICTED: probable mitochondrial chaperone BCS1-B [Sesamum indicum]                        |
| c28026.graph_c0 | 0.24899607    | 0.54833988    | 0.12798792    | 1.33047023     | 3.20776359     | 3.46988879     | 0.0069182 | 2.089619  | up        | PREDICTED: uncharacterized protein LOC105166116 [Sesamum indicum]                           |
| c28033.graph_c0 | 1.44047719    | 1.04609854    | 1.81477472    | 12.7501991     | 13.9759102     | 17.5269454     | 2.027E-19 | 2.3381    | up        | PREDICTED: ATP sulfurylase 2 [Sesamum indicum]                                              |
| c28034.graph_c0 | 0.45793189    | 0.36115611    | 0.39230708    | 6.03411566     | 6.41950036     | 5.71037744     | 1.465E-25 | 2.889447  | up        | PREDICTED: phytohemokine receptor 2-like [Sesamum indicum]                                  |
| c28035.graph_c0 | 0.03140662    | 0.22006647    | 0.12107625    | 2.66191195     | 2.78932106     | 3.34686872     | 1.466E-10 | 3.53996   | up        | PREDICTED: ADP-ribosylation factor GTPase-activating protein AGD3-like [Sesamum indicum]    |
| c28036.graph_c0 | 0.15564349    | 0             | 0             | 3.29794543     | 3.94948284     | 3.06207862     | 1.183E-09 | 5.051804  | up        | PREDICTED: MADS-box protein SVP-like isoform X2 [Nicotiana glauca]                          |
| c28037.graph_c0 | 1.40623608    | 1.54840864    | 0.72282762    | 9.71637302     | 9.05812076     | 7.60810185     | 0.0005332 | 1.834676  | up        | hypothetical protein CICLE_V10005220mg [Citrus clementina]                                  |
| c28038.graph_c0 | 17.1969734    | 17.4843714    | 16.6979659    | 103.938432     | 99.0088328     | 93.590057      | 5.255E-26 | 1.513317  | up        | PREDICTED: aspartic proteinase PCS1-like [Sesamum indicum]                                  |
| c28041.graph_c0 | 0.25444783    | 0.08490087    | 0.16348777    | 1.87531153     | 2.60749804     | 1.73816762     | 6.56E-06  | 2.609971  | up        | PREDICTED: uncharacterized protein LOC105158497 [Sesamum indicum]                           |
| c28042.graph_c0 | 0.59308971    | 0.25973657    | 0.47633985    | 1.84407611     | 3.18360376     | 2.58281604     | 0.0021613 | 1.491583  | up        | PREDICTED: regulatory protein INPK3-like [Sesamum indicum]                                  |
| c28043.graph_c1 | 1.64646237    | 2.07343003    | 2.25227058    | 8.26916196     | 12.0258016     | 11.7116083     | 2.356E-05 | 1.395518  | up        | PREDICTED: uncharacterized protein LOC105176055 isoform X2 [Sesamum indicum]                |
| c28045.graph_c0 | 2.96450156    | 3.37835053    | 2.52013201    | 1.13445368     | 1.64693319     | 1.98147383     | 1.714E-06 | -1.919109 | down      | PREDICTED: cysteine-rich receptor-like protein kinase 10 [Sesamum indicum]                  |
| c28045.graph_c1 | 1.41740089    | 1.48976122    | 1.91248708    | 0.91406151     | 1.452506       | 1.04570541     | 0.0027624 | -1.525224 | down      | hypothetical protein MIMGU_mgv1a002249mg [Erythranthe guttata]                              |
| c28048.graph_c0 | 57.3049691    | 57.8002319    | 64.9261244    | 60.1142524     | 54.4336059     | 55.0431794     | 2.533E-13 | -1.103093 | down      | PREDICTED: alanine aminotransferase 2 [Sesamum indicum]                                     |
| c28049.graph_c0 | 0.27174964    | 0.18134784    | 0             | 4.50636285     | 6.80729196     | 6.68289094     | 1.519E-10 | 4.304493  | up        | -                                                                                           |
| c28052.graph_c0 | 0             | 0             | 0             | 2.03438205     | 4.3103622      | 3.50357597     | 6.326E-10 | Inf       | up        | PREDICTED: pto-interacting protein 1 [Nicotiana glauca]                                     |
| c28056.graph_c0 | 12.4253844    | 12.8860365    | 12.5147626    | 104.364319     | 112.746348     | 112.040919     | 8.828E-32 | 2.102512  | up        | hypothetical protein MIMGU_mgv1a017013mg [Erythranthe guttata]                              |
| c28058.graph_c0 | 3.6539261     | 3.78978682    | 3.22457907    | 23.9286588     | 31.4935469     | 30.7825677     | 5.946E-22 | 1.993569  | up        | PREDICTED: coatamer subunit epsilon-1 [Sesamum indicum]                                     |

| #ID             | 0 h-1<br>FPKM | 0 h-2<br>FPKM | 0 h-3<br>FPKM | 48 h-1<br>FPKM | 48 h-2<br>FPKM | 48 h-3<br>FPKM | FDR       | log2FC    | regulated | nr_annotation                                                                                 |
|-----------------|---------------|---------------|---------------|----------------|----------------|----------------|-----------|-----------|-----------|-----------------------------------------------------------------------------------------------|
| c28061.graph_c0 | 3.13828889    | 2.93200265    | 2.82297783    | 9.01089552     | 11.5878659     | 16.7645759     | 0.0062649 | 1.047058  | up        | flavonoid 3-O-glucosyltransferase [Perilla frutescens]                                        |
| c28063.graph_c0 | 0.67928371    | 0.42497744    | 0.32733992    | 3.91125285     | 4.80645783     | 5.15070971     | 4.563E-05 | 2.260353  | up        | hypothetical protein MIMGU_mgv1a014814mg [Erythranthe guttata]                                |
| c28067.graph_c1 | 0.16786466    | 0             | 0             | 1.77845056     | 2.37554474     | 2.95850211     | 6.647E-09 | 4.402068  | up        | PREDICTED: ATP-dependent 6-phosphofructokinase 6-like [Sesamum indicum]                       |
| c28070.graph_c0 | 17.4304236    | 10.9288903    | 7.99956585    | 1.58815811     | 1.58899089     | 1.41313353     | 7.049E-08 | -3.995747 | down      | -                                                                                             |
| c28072.graph_c0 | 198.493523    | 183.280961    | 193.992839    | 13.5173636     | 14.1183174     | 12.705284      | 3.21E-197 | -4.852685 | down      | PREDICTED: uncharacterized protein LOC104888288 [Beta vulgaris subsp. vulgaris]               |
| c28074.graph_c0 | 3.15199587    | 3.47875746    | 3.42729495    | 1.7125117      | 1.34092932     | 1.65628545     | 5.759E-06 | -2.109538 | down      | PREDICTED: dof zinc finger protein DOF5.4-like [Sesamum indicum]                              |
| c28078.graph_c0 | 4.19414264    | 2.87664204    | 2.69481967    | 41.8591091     | 48.4380028     | 49.1519646     | 4.38E-33  | 2.819071  | up        | hypothetical protein MIMGU_mgv1a007042mg [Erythranthe guttata]                                |
| c28080.graph_c0 | 0.8954879     | 1.43893317    | 1.12045484    | 5.01502132     | 5.24380949     | 4.67482799     | 0.0005813 | 1.09414   | up        | PREDICTED: receptor-like protein kinase HSL1 [Sesamum indicum]                                |
| c28081.graph_c0 | 0.80136317    | 0.87856234    | 0.83363418    | 6.01161102     | 3.94777035     | 3.94143867     | 0.0006868 | 1.458516  | up        | PREDICTED: ent-kaurenoic acid oxidase 1-like [Sesamum indicum]                                |
| c28092.graph_c0 | 0             | 0.08098443    | 0             | 6.18628098     | 14.2126581     | 19.100006      | 2.358E-08 | 7.909449  | up        | PREDICTED: ammonium transporter 1 member 2-like, partial [Sesamum indicum]                    |
| c28093.graph_c0 | 4386.13677    | 4135.01396    | 4879.89869    | 35.8956489     | 35.1685592     | 27.6107711     | 9.41E-198 | -8.102075 | down      | hypothetical protein MIMGU_mgv1a010438mg [Erythranthe guttata]                                |
| c28095.graph_c0 | 2.71875862    | 3.06166618    | 1.52849921    | 10.4101501     | 11.9404061     | 13.0237612     | 0.0017248 | 1.260222  | up        | PREDICTED: transcription factor 1CF2-like [Sesamum indicum]                                   |
| c28098.graph_c0 | 25.4807645    | 15.972379     | 16.2924204    | 0              | 0              | 0              | 2.888E-37 | -Inf      | down      | hypothetical protein GYMLUDRAFT_153379 [Gymnopus luxurians FD-317 M1]                         |
| c28103.graph_c0 | 6.44589236    | 5.37695579    | 5.13560067    | 3.84015012     | 5.03279185     | 4.57940745     | 1.828E-06 | -1.354142 | down      | hypothetical protein MIMGU_mgv1a006429mg [Erythranthe guttata]                                |
| c28104.graph_c0 | 232.45483     | 235.749278    | 272.885036    | 71.2500031     | 54.1584962     | 88.82859       | 1.428E-43 | -2.808713 | down      | -                                                                                             |
| c28105.graph_c0 | 0.58816115    | 0.58875011    | 1.07073135    | 14.6977468     | 12.8199348     | 12.0936036     | 9.825E-32 | 3.118175  | up        | PREDICTED: probable receptor-like serine/threonine-protein kinase At5g57670 [Sesamum indicum] |
| c28106.graph_c0 | 1.21782295    | 0.87074458    | 0.96877901    | 10.7919744     | 13.357119      | 16.0677736     | 1.294E-13 | 2.696093  | up        | PREDICTED: protein GLUTAMINE DUMPER 5-like [Sesamum indicum]                                  |
| c28107.graph_c1 | 5.37034887    | 6.11550534    | 7.59755331    | 45.7985624     | 42.6516223     | 42.2456339     | 2.848E-23 | 1.756513  | up        | PREDICTED: isoaspartyl peptidase/L-asparaginase 1 [Sesamum indicum]                           |
| c28115.graph_c0 | 2.26394451    | 1.51080767    | 1.31609305    | 13.5073474     | 14.9406937     | 12.7699288     | 8.823E-10 | 2.003474  | up        | PREDICTED: CASP-like protein 5A1 [Sesamum indicum]                                            |
| c28116.graph_c0 | 4.94836881    | 5.70811606    | 4.5420356     | 36.0359132     | 41.8092694     | 39.9840937     | 4.694E-25 | 1.936248  | up        | PREDICTED: coatomer subunit alpha-1-like [Sesamum indicum]                                    |
| c28117.graph_c0 | 0.70203915    | 0.95572931    | 0.59541775    | 2.89750388     | 4.79617816     | 4.16652551     | 3.249E-05 | 1.373438  | up        | PREDICTED: protein STICHEL [Sesamum indicum]                                                  |
| c28118.graph_c0 | 0.08732436    | 0.20978832    | 0.22443052    | 8.8332887      | 11.3861735     | 15.3330664     | 2.805E-20 | 5.060952  | up        | PREDICTED: phosphoenolpyruvate carboxylase [Sesamum indicum]                                  |

| #ID             | 0 h-1<br>FPKM | 0 h-2<br>FPKM | 0 h-3<br>FPKM | 48 h-1<br>FPKM | 48 h-2<br>FPKM | 48 h-3<br>FPKM | FDR       | log2FC    | regulated | nr_annotation                                                                                                  |
|-----------------|---------------|---------------|---------------|----------------|----------------|----------------|-----------|-----------|-----------|----------------------------------------------------------------------------------------------------------------|
| c28123.graph_c0 | 7.96623088    | 8.27856694    | 7.34557767    | 4.81797701     | 5.57885893     | 5.13443858     | 3.793E-08 | -1.621606 | down      | PREDICTED: uncharacterized protein LOC105171936 [Sesamum indicum]                                              |
| c28130.graph_c0 | 62.9381511    | 58.4921438    | 65.9244265    | 40.922205      | 47.2599103     | 40.6176999     | 2.442E-20 | -1.560519 | down      | unnamed protein product [Coffea canephora]                                                                     |
| c28139.graph_c0 | 20.4293854    | 21.2997059    | 20.1837934    | 83.6429343     | 82.4467553     | 88.822799      | 5.693E-12 | 1.024261  | up        | PREDICTED: adenylate kinase 4 [Sesamum indicum]                                                                |
| c28141.graph_c0 | 3.37405204    | 2.80624752    | 2.93303472    | 21.6444984     | 29.3945955     | 31.9901102     | 1.74E-16  | 2.164841  | up        | PREDICTED: U-box domain-containing protein 11-like [Sesamum indicum]                                           |
| c28142.graph_c1 | 19.6552174    | 17.9340021    | 19.6882606    | 2.74666878     | 2.7211668      | 2.37608133     | 3.13E-104 | -3.884891 | down      | PREDICTED: trihelix transcription factor PTL [Sesamum indicum]                                                 |
| c28145.graph_c0 | 0.04488097    | 0.02246296    | 0.02883691    | 0.41347276     | 1.029357       | 1.67397038     | 0.0023233 | 3.987107  | up        | PREDICTED: G-type lectin 5-receptor-like serine/threonine-protein kinase At2g19130 isoform X2 [Vitis vinifera] |
| c28146.graph_c0 | 0.88948183    | 1.26136106    | 1.04776776    | 6.21415249     | 8.02998525     | 7.47369021     | 0.0001257 | 1.741403  | up        | PREDICTED: T-complex protein 1 subunit gamma-like [Malus domestica]                                            |
| c28148.graph_c0 | 0.219217      | 0.13166191    | 0.16902152    | 5.25088203     | 7.44542361     | 8.37402584     | 1.254E-17 | 4.317519  | up        | PREDICTED: uncharacterized protein LOC105177785 [Sesamum indicum]                                              |
| c28150.graph_c0 | 9.49960364    | 7.88414053    | 11.5892723    | 0.44312175     | 0.41075454     | 0.39428706     | 8.635E-31 | -5.555441 | down      | -                                                                                                              |
| c28151.graph_c0 | 0.45751377    | 0.68695785    | 0.54269843    | 8.67299866     | 12.6227532     | 14.6987075     | 1.707E-15 | 3.389861  | up        | PREDICTED: uncharacterized protein LOC105163554 [Sesamum indicum]                                              |
| c28152.graph_c0 | 9.27489285    | 8.2624762     | 8.2688883     | 48.7739284     | 55.5680561     | 51.2927368     | 9.589E-22 | 1.573876  | up        | PREDICTED: probable prolyl 4-hydroxylase 4 [Sesamum indicum]                                                   |
| c28153.graph_c0 | 6.55382365    | 7.17194775    | 6.56624495    | 4.09343039     | 5.09537944     | 5.14476252     | 4.934E-07 | -1.522748 | down      | PREDICTED: probable alpha,alpha-trehalose-phosphate synthase [UDP-forming] 7 [Sesamum indicum]                 |
| c28156.graph_c0 | 46.5717805    | 42.5833036    | 46.7310325    | 204.410932     | 217.050835     | 224.137988     | 3.072E-18 | 1.229052  | up        | PREDICTED: 60S ribosomal protein L13a-4 [Sesamum indicum]                                                      |
| c28158.graph_c0 | 46.0224572    | 49.6505449    | 47.9001184    | 43.3146321     | 49.1850031     | 45.7115362     | 6.84E-11  | -1.074348 | down      | hypothetical protein MIMGU_mgv1a015858mg [Erythranthe guttata]                                                 |
| c28161.graph_c0 | 1.86998308    | 1.3370397     | 1.65921587    | 5.86555488     | 7.16982018     | 7.3359876      | 7.125E-05 | 1.044473  | up        | PREDICTED: uncharacterized protein LOC105175750 [Sesamum indicum]                                              |
| c28167.graph_c0 | 0             | 0.17601392    | 0.15063906    | 1.13395301     | 1.14408164     | 1.77773472     | 6.405E-06 | 2.604121  | up        | PREDICTED: uncharacterized protein LOC105171763 [Sesamum indicum]                                              |
| c28171.graph_c0 | 5.16365868    | 2.58441465    | 6.16154114    | 72.7156588     | 95.7518252     | 94.4829965     | 2.907E-32 | 3.213721  | up        | protein of unknown function ORF005/ [Medicago truncatula]                                                      |
| c28172.graph_c0 | 0.77184763    | 1.01406443    | 0.92986384    | 92.7510252     | 101.695392     | 109.894076     | 1.53E-173 | 5.787555  | up        | PREDICTED: 1,4-dihydroxy-2-naphthoyl-CoA synthase, peroxisomal [Sesamum indicum]                               |
| c28174.graph_c0 | 0.28793858    | 0.03602836    | 0.18500623    | 2.38741017     | 3.23171925     | 3.18645482     | 1.367E-08 | 3.09074   | up        | PREDICTED: cytochrome P450 94A1 [Sesamum indicum]                                                              |
| c28176.graph_c0 | 1.23246868    | 1.96270901    | 1.43979186    | 23.7408203     | 28.485698      | 31.1355863     | 4.777E-32 | 3.147655  | up        | PREDICTED: PRA1 family protein B1 [Sesamum indicum]                                                            |
| c28177.graph_c0 | 0.63623994    | 0.38212622    | 1.14463091    | 6.21314474     | 4.84341255     | 5.21548946     | 0.0003553 | 1.889191  | up        | -                                                                                                              |
| c28178.graph_c0 | 10.5705561    | 5.18882872    | 5.74690054    | 0              | 0              | 0              | 1.813E-14 | -Inf      | down      | 60S ribosomal protein L13a [Rozella allomyces CSF55]                                                           |

| #ID             | 0 h-1<br>FPKM | 0 h-2<br>FPKM | 0 h-3<br>FPKM | 48 h-1<br>FPKM | 48 h-2<br>FPKM | 48 h-3<br>FPKM | FDR       | log2FC    | regulated | nr_annotation                                                                                                           |
|-----------------|---------------|---------------|---------------|----------------|----------------|----------------|-----------|-----------|-----------|-------------------------------------------------------------------------------------------------------------------------|
| c28179.graph_c0 | 7.23674932    | 6.44892312    | 6.12406716    | 17.8869806     | 34.8835466     | 33.7124052     | 0.0059577 | 1.099003  | up        | PREDICTED: heavy metal-associated isoprenylated plant protein 26-like [Sesamum indicum]                                 |
| c28183.graph_c0 | 0.18738233    | 0             | 0.0343991     | 1.9975621      | 2.01167237     | 2.26017445     | 3.045E-10 | 3.815491  | up        | PREDICTED: LOW QUALITY PROTEIN: protein tesmin/TSO1-like CXC 2 [Sesamum indicum]                                        |
| c28185.graph_c0 | 0             | 0.03425619    | 0.13192957    | 1.19804367     | 3.10615595     | 3.19803617     | 4.404E-06 | 4.440424  | up        | PREDICTED: lysosomal Pro-X carboxypeptidase [Sesamum indicum]                                                           |
| c28188.graph_c1 | 0             | 0             | 0             | 1.96643        | 1.8993829      | 1.13217021     | 2.694E-09 | Inf       | up        | PREDICTED: omega-hydroxypalmitate O-feruloyl transferase [Sesamum indicum]                                              |
| c28192.graph_c0 | 12.8697776    | 11.857519     | 11.668844     | 7.64223948     | 8.16266001     | 7.72347806     | 1.002E-18 | -1.646892 | down      | PREDICTED: probable WRKY transcription factor 21 isoform X1 [Sesamum indicum]                                           |
| c28196.graph_c0 | 0.75146804    | 0.81008364    | 0.96566618    | 21.5678505     | 24.5974216     | 26.5830109     | 7.393E-35 | 3.824307  | up        | PREDICTED: uncharacterized protein LOC105157188 [Sesamum indicum]                                                       |
| c28198.graph_c0 | 10.2774906    | 9.98520013    | 10.9626585    | 0.37130567     | 0.22945611     | 0.08259639     | 4.34E-102 | -6.515188 | down      | PREDICTED: flavonoid 3'-monooxygenase-like [Sesamum indicum]                                                            |
| c28199.graph_c0 | 2.54924495    | 2.87895117    | 2.14192199    | 8.91237298     | 12.0890481     | 12.0292195     | 1.988E-05 | 1.10471   | up        | PREDICTED: aspartate carbamoyltransferase 1, chloroplastic [Sesamum indicum]                                            |
| c28203.graph_c0 | 8.12679349    | 7.49468202    | 7.90496112    | 4.17673766     | 3.5985495      | 4.00943308     | 2.941E-28 | -2.01274  | down      | PREDICTED: disease resistance protein RGA2-like [Sesamum indicum]                                                       |
| c28206.graph_c0 | 0             | 0             | 0             | 4.6124764      | 6.68481119     | 8.32231179     | 1.666E-21 | Inf       | up        | PREDICTED: cytokinin dehydrogenase 5-like [Sesamum indicum]                                                             |
| c28208.graph_c0 | 4.26456225    | 3.59480637    | 3.51882117    | 25.6405431     | 28.6088214     | 31.646337      | 3.959E-20 | 1.897528  | up        | PREDICTED: biotin carboxyl carrier protein of acetyl-CoA carboxylase 2, chloroplastic-like isoform X2 [Sesamum indicum] |
| c28209.graph_c0 | 11.0782775    | 9.92885514    | 13.5738844    | 1.42409746     | 0.50288619     | 0.95036502     | 2.009E-24 | -4.592395 | down      | PREDICTED: zinc finger CCCH domain-containing protein 23 [Sesamum indicum]                                              |
| c28209.graph_c1 | 14.116436     | 14.4752195    | 15.6624961    | 0.57095041     | 1.00808788     | 0.50802824     | 1.811E-61 | -5.431358 | down      | PREDICTED: zinc finger CCCH domain-containing protein 20-like [Sesamum indicum]                                         |
| c28210.graph_c0 | 0.03074336    | 0             | 0             | 6.51424106     | 9.78148615     | 13.4827735     | 2.448E-17 | 8.914363  | up        | PREDICTED: LRR receptor-like serine/threonine-protein kinase GSO1 [Sesamum indicum]                                     |
| c28213.graph_c0 | 3.08007553    | 3.11309335    | 2.03665055    | 37.8250366     | 37.8821629     | 35.0047108     | 1.016E-52 | 2.737178  | up        | PREDICTED: probable mitochondrial chaperone BCS1-A [Sesamum indicum]                                                    |
| c28214.graph_c0 | 1.66114017    | 1.24710266    | 2.25322149    | 16.238721      | 16.7976506     | 18.2694324     | 6.048E-17 | 2.289864  | up        | PREDICTED: myb family transcription factor APL-like [Sesamum indicum]                                                   |
| c28215.graph_c0 | 8.34731783    | 6.18320054    | 6.65051302    | 39.9884869     | 45.7845762     | 41.9451324     | 8.851E-13 | 1.574201  | up        | Uncharacterized protein isoform 1 [Theobroma cacao]                                                                     |
| c28216.graph_c0 | 0.34826645    | 0.34861519    | 0.22376809    | 2.56676618     | 2.12435745     | 2.49800809     | 0.0006534 | 1.954496  | up        | -                                                                                                                       |
| c28219.graph_c0 | 67.100205     | 65.0535516    | 76.6607825    | 34.9696966     | 31.5845507     | 33.3229289     | 2.554E-33 | -2.081457 | down      | PREDICTED: light-induced protein, chloroplastic-like [Sesamum indicum]                                                  |
| c28222.graph_c0 | 236.478816    | 231.936076    | 229.20001     | 119.761352     | 75.0612955     | 54.7124051     | 8.175E-65 | -2.488062 | down      | PREDICTED: uncharacterized protein LOC105155796 [Sesamum indicum]                                                       |

| #ID             | 0 h-1<br>FPKM | 0 h-2<br>FPKM | 0 h-3<br>FPKM | 48 h-1<br>FPKM | 48 h-2<br>FPKM | 48 h-3<br>FPKM | FDR       | log2FC    | regulated | nr_annotation                                                                                                           |
|-----------------|---------------|---------------|---------------|----------------|----------------|----------------|-----------|-----------|-----------|-------------------------------------------------------------------------------------------------------------------------|
| c28223.graph_c0 | 4.92755412    | 4.70828431    | 5.46863366    | 50.9671505     | 47.1077032     | 59.4877958     | 2.508E-21 | 2.363717  | up        | PREDICTED: 50S ribosomal protein L29, chloroplastic-like [Solanum lycopersicum]                                         |
| c28226.graph_c0 | 0.04976265    | 0.04981248    | 0.06394698    | 6.18902095     | 6.45938365     | 10.0348933     | 1.73E-16  | 6.091378  | up        | hypothetical protein MIMGU_mgv1a020800mg [Erythranthe guttata]                                                          |
| c28230.graph_c0 | 20.5152463    | 17.7396215    | 19.1248744    | 2.23593549     | 2.36870253     | 3.30335721     | 6.068E-76 | -3.880074 | down      | PREDICTED: inorganic pyrophosphatase 2 [Sesamum indicum]                                                                |
| c28233.graph_c0 | 0.36569308    | 0.41597644    | 0.7262556     | 3.8743537      | 3.63394223     | 3.28386469     | 3.376E-08 | 1.816549  | up        | hypothetical protein MIMGU_mgv1a025694mg [Erythranthe guttata]                                                          |
| c28237.graph_c0 | 1.43895253    | 1.46362558    | 0.83508237    | 14.689134      | 11.5294474     | 10.0452985     | 6.56E-09  | 2.27231   | up        | hypothetical protein MIMGU_mgv1a003416mg [Erythranthe guttata]                                                          |
| c28238.graph_c0 | 23.6006966    | 18.8208611    | 23.712887     | 18.2058281     | 17.9670154     | 19.5609088     | 6.586E-12 | -1.265578 | down      | PREDICTED: dnaJ homolog subfamily C member 2-like [Sesamum indicum]                                                     |
| c28239.graph_c0 | 25.9110514    | 21.2928728    | 25.197523     | 213.790169     | 242.802599     | 253.375831     | 3.172E-54 | 2.273103  | up        | PREDICTED: cytochrome c oxidase subunit 6a, mitochondrial [Sesamum indicum]                                             |
| c28240.graph_c0 | 1.77790439    | 1.73574186    | 1.55132425    | 75.303946      | 77.8045788     | 77.9265971     | 4.66E-161 | 4.494729  | up        | PREDICTED: LOW QUALITY PROTEIN: pyrophosphate--fructose 6-phosphate 1-phosphotransferase subunit beta [Sesamum indicum] |
| c28244.graph_c0 | 66.8375991    | 60.0360013    | 52.9049874    | 56.8926345     | 62.7511294     | 51.4560199     | 1.21E-07  | -1.087151 | down      | -                                                                                                                       |
| c28248.graph_c0 | 1.8767961     | 2.75247795    | 2.74828156    | 0.56293902     | 1.32052389     | 1.75314913     | 2.612E-06 | -2.055425 | down      | -                                                                                                                       |
| c28251.graph_c0 | 5.24663146    | 6.01579574    | 7.10988165    | 56.6842315     | 72.8979919     | 77.1025834     | 1.182E-31 | 2.466529  | up        | PREDICTED: fasciclin-like arabinogalactan protein 7 [Sesamum indicum]                                                   |
| c28252.graph_c0 | 14.8777449    | 17.8869307    | 17.0953705    | 17.2598469     | 17.0554904     | 14.3252571     | 2.104E-06 | -1.052342 | down      | PREDICTED: uncharacterized protein LOC105177997 [Sesamum indicum]                                                       |
| c28254.graph_c0 | 2.06750906    | 2.00194605    | 1.73649085    | 9.47382429     | 8.49332594     | 8.10851298     | 1.862E-09 | 1.153957  | up        | PREDICTED: protein SCAR1-like isoform X2 [Sesamum indicum]                                                              |
| c28257.graph_c0 | 40.8207442    | 39.6693712    | 39.0987071    | 14.4641277     | 11.5891116     | 12.1304333     | 1.066E-68 | -2.660061 | down      | PREDICTED: lanC-like protein GCL1 [Sesamum indicum]                                                                     |
| c28260.graph_c0 | 10.598748     | 9.68277929    | 11.1218542    | 52.3603003     | 59.3992237     | 63.58684       | 2.517E-20 | 1.46002   | up        | hypothetical protein M569_06331, partial [Genlisea aurea]                                                               |
| c28262.graph_c0 | 22.037398     | 23.6166039    | 16.4360843    | 10.7482704     | 12.4829659     | 12.1849213     | 5.265E-14 | -1.826768 | down      | hypothetical protein MIMGU_mgv1a015596mg [Erythranthe guttata]                                                          |
| c28264.graph_c0 | 0.63848138    | 0.69998937    | 0.66419312    | 8.76714037     | 8.90197011     | 8.02525721     | 7.824E-16 | 2.664472  | up        | hypothetical protein MIMGU_mgv1a005920mg [Erythranthe guttata]                                                          |
| c28266.graph_c0 | 1.03412553    | 0.74761632    | 0.51679143    | 7.40991916     | 6.78456581     | 7.34682168     | 6.857E-07 | 2.217931  | up        | PREDICTED: protein trichome birefringence-like 41 [Sesamum indicum]                                                     |
| c28269.graph_c1 | 4.0257316     | 4.60544316    | 2.74497626    | 14.9107552     | 21.088244      | 20.1369675     | 6.646E-05 | 1.283768  | up        | PREDICTED: vesicle-fusing ATPase [Sesamum indicum]                                                                      |
| c28271.graph_c0 | 0             | 0             | 0             | 6.59589085     | 6.07612745     | 7.91036976     | 1.26E-12  | Inf       | up        | PREDICTED: transcription factor bHLH79-like [Sesamum indicum]                                                           |
| c28274.graph_c0 | 2.88116668    | 2.88405173    | 4.5322645     | 33.2705116     | 37.2822971     | 35.5898344     | 5.35E-31  | 2.341151  | up        | PREDICTED: uncharacterized protein LOC105166742 isoform X3 [Sesamum indicum]                                            |



| #ID             | 0 h-1<br>FPKM | 0 h-2<br>FPKM | 0 h-3<br>FPKM | 48 h-1<br>FPKM | 48 h-2<br>FPKM | 48 h-3<br>FPKM | FDR       | log2FC    | regulated | nr_annotation                                                                  |
|-----------------|---------------|---------------|---------------|----------------|----------------|----------------|-----------|-----------|-----------|--------------------------------------------------------------------------------|
| c28275.graph_c0 | 0.03595314    | 0.05398371    | 0.04620121    | 1.57331285     | 2.05271474     | 2.47565563     | 1.406E-14 | 4.461524  | up        | PREDICTED: protein argonaute 7 isoform X1 [Sesamum indicum]                    |
| c28276.graph_c0 | 0.28330451    | 0.28358819    | 0.242705      | 13.9634246     | 11.5667643     | 11.1472788     | 2.343E-26 | 4.489845  | up        | PREDICTED: uncharacterized protein LOC105160853 [Sesamum indicum]              |
| c28278.graph_c0 | 1.39430743    | 1.18097998    | 0.82695704    | 5.9285859      | 5.65255609     | 6.24234377     | 0.0082674 | 1.376685  | up        | PREDICTED: RNA-binding protein 42, partial [Sesamum indicum]                   |
| c28279.graph_c0 | 2.2700451     | 2.18262144    | 2.07267477    | 1.98124447     | 1.2243515      | 1.88532299     | 0.0002344 | -1.369084 | down      | PREDICTED: QWRF motif-containing protein 2-like [Sesamum indicum]              |
| c28280.graph_c0 | 26.4104309    | 27.949284     | 31.2202668    | 7.96186418     | 5.42647504     | 3.61652152     | 6.844E-58 | -3.339259 | down      | -                                                                              |
| c28281.graph_c0 | 1.96001472    | 1.80501919    | 1.41047005    | 0              | 0              | 0              | 2.3E-19   | -Inf      | down      | PREDICTED: extracellular ribonuclease LE-like isoform X1 [Phoenix dactylifera] |
| c28283.graph_c0 | 0             | 0             | 0             | 0.9447499      | 1.36479268     | 1.03168568     | 1.107E-11 | Inf       | up        | -                                                                              |
| c28292.graph_c0 | 9.82851532    | 10.3144066    | 9.4928945     | 8.49970577     | 9.7160962      | 9.66814844     | 3.442E-09 | -1.10726  | down      | PREDICTED: uncharacterized protein LOC105175287 [Sesamum indicum]              |
| c28293.graph_c0 | 0.15330805    | 0.46038468    | 0             | 28.106237      | 17.7304285     | 10.3679535     | 2.92E-06  | 5.527435  | up        | PREDICTED: nudix hydrolase 17, mitochondrial [Sesamum indicum]                 |
| c28296.graph_c1 | 0.25151993    | 0.37765768    | 0.32321307    | 3.24403188     | 4.29582302     | 2.98961006     | 3.814E-05 | 2.445466  | up        | -                                                                              |
| c28297.graph_c0 | 0.28282476    | 0.50959434    | 0.58150562    | 5.15902097     | 3.47795455     | 6.76977789     | 1.21E-05  | 2.465952  | up        | PREDICTED: CTD small phosphatase-like protein [Sesamum indicum]                |
| c28302.graph_c0 | 3.36936384    | 2.56730783    | 3.48966209    | 87.5164603     | 97.7683699     | 99.5965241     | 5.51E-109 | 3.896452  | up        | PREDICTED: reticulon-like protein B2 isoform X1 [Nicotiana tomentosiformis]    |
| c28305.graph_c0 | 0.74081264    | 1.01121062    | 0.77888747    | 4.7153504      | 6.37563385     | 8.2257615      | 3.838E-05 | 1.908209  | up        | PREDICTED: uncharacterized protein LOC105178720 [Sesamum indicum]              |
| c28308.graph_c0 | 0             | 0             | 0             | 268.580932     | 265.88474      | 341.756686     | 6.98E-139 | Inf       | up        | PREDICTED: uncharacterized oxidoreductase At4g09670-like [Sesamum indicum]     |
| c28309.graph_c0 | 0.13270456    | 0.13283744    | 0.0852653     | 1.28368897     | 2.39603686     | 2.12126335     | 1.811E-06 | 3.024486  | up        | PREDICTED: uncharacterized protein LOC105156370 [Sesamum indicum]              |
| c28310.graph_c1 | 38.6845136    | 31.5784137    | 29.1019608    | 202.872675     | 202.534711     | 193.228219     | 7.877E-27 | 1.576183  | up        | PREDICTED: 14-3-3-like protein A [Populus euphratica]                          |
| c28311.graph_c1 | 0.0633247     | 0.25355244    | 0.32549898    | 1.86684298     | 1.97769377     | 3.21839221     | 3.621E-05 | 2.426448  | up        | PREDICTED: uncharacterized protein LOC105155826 [Sesamum indicum]              |
| c28312.graph_c0 | 0.40101606    | 0.6221973     | 0.77298226    | 3.12178614     | 4.3638776      | 5.63767492     | 9.931E-06 | 1.838566  | up        | PREDICTED: uncharacterized protein LOC105156537 [Sesamum indicum]              |
| c28313.graph_c0 | 0             | 0.04636332    | 0             | 3.96832773     | 4.65600098     | 5.35344275     | 8.825E-18 | 7.226184  | up        | malate dehydrogenase, putative [Ricinus communis]                              |
| c28316.graph_c0 | 9.75125918    | 8.86960591    | 10.1275958    | 7.46573639     | 6.86609178     | 7.6284625      | 1.139E-09 | -1.406007 | down      | hypothetical protein MIMGU_mgv1a003597mg [Erythranthe guttata]                 |
| c28317.graph_c0 | 0.4857728     | 0.91173606    | 1.24847457    | 7.83169782     | 8.59304613     | 10.2040179     | 1.789E-08 | 2.30306   | up        | PREDICTED: cyclin-P3-1-like [Sesamum indicum]                                  |

| #ID             | 0 h-1<br>FPKM | 0 h-2<br>FPKM | 0 h-3<br>FPKM | 48 h-1<br>FPKM | 48 h-2<br>FPKM | 48 h-3<br>FPKM | FDR       | log2FC    | regulated | nr_annotation                                                                                |
|-----------------|---------------|---------------|---------------|----------------|----------------|----------------|-----------|-----------|-----------|----------------------------------------------------------------------------------------------|
| c28321.graph_c0 | 151.958408    | 144.991047    | 155.320504    | 159.141158     | 111.271565     | 94.0178658     | 3.902E-13 | -1.320655 | down      | PREDICTED: AP2/ERF and B3 domain-containing transcription factor RAV1-like [Sesamum indicum] |
| c28325.graph_c0 | 7.84559573    | 8.28293755    | 7.48266099    | 32.8077742     | 33.0210567     | 39.2913412     | 1.034E-08 | 1.136295  | up        | PREDICTED: upstream activation factor subunit UAF30 [Sesamum indicum]                        |
| c28326.graph_c0 | 2.18156737    | 1.84120256    | 1.81396499    | 9.61552401     | 9.81075086     | 11.7467413     | 5.436E-06 | 1.399226  | up        | PREDICTED: WEB family protein At2g38370-like [Sesamum indicum]                               |
| c28328.graph_c0 | 3.09425412    | 2.49684542    | 2.2721366     | 15.707546      | 20.5537784     | 25.5458996     | 5.398E-09 | 1.953254  | up        | PREDICTED: protein ASPARTIC PROTEASE IN GUARD CELL 2 [Sesamum indicum]                       |
| c28329.graph_c0 | 2.4695985     | 2.89829064    | 3.28296398    | 0.5491754      | 0.41556053     | 0.97730593     | 1.723E-09 | -3.177918 | down      | PREDICTED: uncharacterized protein LOC105163289 [Sesamum indicum]                            |
| c28334.graph_c0 | 3.56459905    | 3.18972635    | 3.43548818    | 24.4305319     | 31.310437      | 38.7611851     | 7.199E-12 | 2.189707  | up        | hypothetical protein MIMGU_mgv1a019816mg [Erythranthe guttata]                               |
| c28336.graph_c0 | 6.02666034    | 5.57451576    | 6.37205461    | 3.79514228     | 5.28620384     | 6.5661843      | 0.0008482 | -1.225722 | down      | PREDICTED: maviyanin [Sesamum indicum]                                                       |
| c28344.graph_c0 | 2.67553266    | 2.00865885    | 2.66457818    | 7.64111312     | 11.2935974     | 12.7755713     | 0.0021892 | 1.08314   | up        | PREDICTED: CASP-like protein 2D1 isoform X2 [Sesamum indicum]                                |
| c28346.graph_c1 | 0.26645469    | 0.2667215     | 0.24457487    | 39.7319531     | 42.0911866     | 46.3679911     | 5.27E-127 | 6.346436  | up        | PREDICTED: lysM domain-containing GPI-anchored protein 1 [Sesamum indicum]                   |
| c28347.graph_c0 | 5.34714701    | 5.40347757    | 5.36615467    | 3.04951561     | 2.28626512     | 1.96202632     | 2.527E-10 | -2.153335 | down      | PREDICTED: 60S ribosomal protein L3-like [Nicotiana tomentosiformis]                         |
| c28348.graph_c0 | 22.4992334    | 25.0919129    | 22.0808716    | 21.9256348     | 16.3524533     | 16.0418778     | 6.468E-22 | -1.369787 | down      | PREDICTED: scarecrow-like protein 4 [Sesamum indicum]                                        |
| c28349.graph_c0 | 0.03923909    | 0.11783514    | 0.40339024    | 1.77133068     | 1.53184496     | 1.96210781     | 3.035E-05 | 2.195604  | up        | PREDICTED: L-tryptophan--pyruvate aminotransferase 1-like [Sesamum indicum]                  |
| c28350.graph_c0 | 9.52936894    | 9.28248882    | 8.42709084    | 90.3867256     | 93.4536851     | 99.030539      | 6.207E-51 | 2.359119  | up        | PREDICTED: gamma carbonic anhydrase 1, mitochondrial [Sesamum indicum]                       |
| c28351.graph_c0 | 3.35829492    | 2.49723147    | 1.84951797    | 0              | 0              | 0              | 4.731E-19 | -Inf      | down      | -                                                                                            |
| c28352.graph_c0 | 5.9863192     | 6.70326606    | 7.04073708    | 0.56084621     | 0.29707428     | 0.08317293     | 9.614E-24 | -5.387228 | down      | -                                                                                            |
| c28353.graph_c0 | 15.5665914    | 14.0127509    | 12.9520271    | 0.30951711     | 0.43719446     | 0.18360431     | 7.422E-45 | -6.532129 | down      | hypothetical protein MIMGU_mgv1a016475mg [Erythranthe guttata]                               |
| c28357.graph_c0 | 2.24564729    | 1.70530039    | 2.18918638    | 12.4843597     | 15.2661966     | 15.5519115     | 6.112E-07 | 1.796072  | up        | hypothetical protein MIMGU_mgv1a013733mg [Erythranthe guttata]                               |
| c28360.graph_c0 | 0.15079841    | 0.03773735    | 0.04844548    | 1.45871596     | 1.58212632     | 1.54518653     | 3.835E-07 | 3.264242  | up        | -                                                                                            |
| c28362.graph_c0 | 8.88730854    | 6.44208154    | 7.87623679    | 2.25863953     | 3.58913207     | 1.50729291     | 2.099E-07 | -2.678822 | down      | MAP kinase 20 [Theobroma cacao]                                                              |
| c28364.graph_c0 | 0.37376394    | 0.93534551    | 0.72045218    | 20.4879751     | 26.0819086     | 26.502549      | 6.985E-15 | 4.145698  | up        | PREDICTED: uncharacterized protein At3g50808-like [Malus domestica]                          |
| c28364.graph_c1 | 0.74604487    | 0.18669798    | 0.7190229     | 20.103677      | 20.5692915     | 22.7806111     | 4.458E-14 | 4.241564  | up        | hypothetical protein glysoja_041042 [Glycine soja]                                           |
| c28365.graph_c0 | 0.10251589    | 0             | 0             | 2.4555248      | 3.30172628     | 3.7816197      | 3.722E-10 | 5.537447  | up        | -                                                                                            |

| #ID             | 0 h-1<br>FPKM | 0 h-2<br>FPKM | 0 h-3<br>FPKM | 48 h-1<br>FPKM | 48 h-2<br>FPKM | 48 h-3<br>FPKM | FDR       | log2FC    | regulated | nr_annotation                                                                               |
|-----------------|---------------|---------------|---------------|----------------|----------------|----------------|-----------|-----------|-----------|---------------------------------------------------------------------------------------------|
| c28372.graph_c0 | 0.11173369    | 0.33553672    | 0.23930369    | 8.98977558     | 12.2861415     | 12.5481253     | 5.197E-31 | 4.596915  | up        | PREDICTED: endoplasmic reticulum-Golgi intermediate compartment protein 3 [Sesamum indicum] |
| c28382.graph_c0 | 2.3141341     | 1.55695911    | 1.75500233    | 78.1824634     | 77.0859707     | 85.3329853     | 4.12E-132 | 4.402114  | up        | hypothetical protein JCGZ_02248 [Jatropha curcas]                                           |
| c28384.graph_c0 | 30.2889641    | 30.1068996    | 27.9478676    | 10.5556928     | 11.1824766     | 12.479706      | 5.618E-44 | -2.386896 | down      | PREDICTED: uncharacterized protein LOC102593344 [Solanum tuberosum]                         |
| c28385.graph_c0 | 7.20413563    | 6.50780319    | 9.0318044     | 85.9562031     | 108.551959     | 131.937315     | 7.091E-18 | 2.817189  | up        | hypothetical protein M569_02037, partial [Genlisea aurea]                                   |
| c28386.graph_c0 | 25.0636073    | 26.0149755    | 27.0096451    | 11.3259039     | 12.0242249     | 11.8331952     | 2.944E-46 | -2.169332 | down      | hypothetical protein MIMGU_mgv1a002759mg [Erythranthe guttata]                              |
| c28387.graph_c0 | 0.20487204    | 0.30761578    | 0.13163434    | 2.45363932     | 1.19969231     | 2.12725317     | 0.0008885 | 2.162858  | up        | PREDICTED: transcription factor HBP-1b(c38)-like [Sesamum indicum]                          |
| c28389.graph_c0 | 7.81179128    | 6.50639606    | 7.81620634    | 1.53823272     | 2.61895347     | 2.24859537     | 1.087E-16 | -2.81545  | down      | PREDICTED: endo-1,3;1,4-beta-D-glucanase-like [Sesamum indicum]                             |
| c28395.graph_c0 | 1.08222216    | 1.44440779    | 0.92713222    | 14.2905289     | 13.3787241     | 10.3499287     | 3.951E-05 | 2.449017  | up        | PREDICTED: protein transport protein SEC31 homolog B [Sesamum indicum]                      |
| c28395.graph_c1 | 7.1100379     | 8.56694887    | 6.26031791    | 46.3368169     | 46.3896708     | 48.9473959     | 4.573E-18 | 1.675305  | up        | PREDICTED: protein transport protein SEC31 homolog B [Sesamum indicum]                      |
| c28396.graph_c0 | 0             | 0             | 0             | 1.90654754     | 3.42480355     | 3.24535303     | 1.429E-11 | Inf       | up        | PREDICTED: leucine-rich repeat extensin-like protein 3 [Vitis vinifera]                     |
| c28399.graph_c0 | 3.89165192    | 3.72617714    | 3.7688144     | 0.25980026     | 0.27522687     | 0.18493497     | 1.247E-22 | -4.998835 | down      | hypothetical protein MIMGU_mgv1a013527mg [Erythranthe guttata]                              |
| c28400.graph_c0 | 9.01366711    | 10.3792517    | 12.595412     | 0.52262799     | 0.18455366     | 0.12917535     | 7.163E-45 | -6.253012 | down      | -                                                                                           |
| c28401.graph_c0 | 13.2583821    | 12.8174952    | 10.6889547    | 3.06523232     | 4.72326105     | 3.42994393     | 1.248E-29 | -2.733646 | down      | -                                                                                           |
| c28409.graph_c0 | 37.3504938    | 36.3941964    | 35.9577829    | 3.77249324     | 4.60202932     | 4.22135711     | 7.83E-105 | -4.142805 | down      | PREDICTED: uncharacterized protein LOC105172478 [Sesamum indicum]                           |
| c28414.graph_c0 | 0.1132684     | 0.22676365    | 0.65499471    | 7.20016651     | 11.4968282     | 15.3667107     | 3.568E-09 | 4.053486  | up        | PREDICTED: vacuole membrane protein KMS1-like [Sesamum indicum]                             |
| c28414.graph_c1 | 0.14955928    | 0.07485452    | 0.28828439    | 5.78691805     | 9.12282436     | 9.8079331      | 7.832E-15 | 4.554816  | up        | PREDICTED: vacuole membrane protein KMS1-like [Sesamum indicum]                             |
| c28415.graph_c0 | 19.8742326    | 20.4280158    | 18.4329362    | 5.58593067     | 8.60246061     | 9.71054728     | 2.287E-46 | -2.322229 | down      | PREDICTED: DEAD-box ATP-dependent RNA helicase 18 [Sesamum indicum]                         |
| c28416.graph_c0 | 0.53584134    | 1.0727558     | 0.64554125    | 12.742392      | 17.0617143     | 17.2405064     | 1.047E-32 | 3.361703  | up        | PREDICTED: serine carboxypeptidase-like 51 [Sesamum indicum]                                |
| c28424.graph_c0 | 8.26895633    | 8.27723644    | 7.08395751    | 3.87948709     | 7.32299861     | 4.83272199     | 1.037E-06 | -1.584062 | down      | autophagy protein 8 [Trichophyton rubrum CBS 118892]                                        |
| c28425.graph_c0 | 2.75118341    | 1.74815214    | 1.47563671    | 0              | 0              | 0              | 9.421E-21 | -Inf      | down      | ATP dependent RNA helicase dbp2 [Aspergillus fumigatus var. RP-2014]                        |
| c28426.graph_c0 | 22.1569478    | 22.3221233    | 21.170854     | 17.6488521     | 16.3113092     | 16.8748001     | 1.61E-22  | -1.384591 | down      | PREDICTED: methyltransferase-like protein 1 [Sesamum indicum]                               |

| #ID             | 0 h-1<br>FPKM | 0 h-2<br>FPKM | 0 h-3<br>FPKM | 48 h-1<br>FPKM | 48 h-2<br>FPKM | 48 h-3<br>FPKM | FDR       | log2FC    | regulated | nr_annotation                                                                                     |
|-----------------|---------------|---------------|---------------|----------------|----------------|----------------|-----------|-----------|-----------|---------------------------------------------------------------------------------------------------|
| c28428.graph_c0 | 64.5639069    | 70.791766     | 63.864618     | 35.381172      | 37.814055      | 34.6887076     | 3.617E-41 | -1.902457 | down      | PREDICTED: uncharacterized protein LOC105164194 [Sesamum indicum]                                 |
| c28432.graph_c0 | 0.94399704    | 0.6670181     | 0.99900177    | 15.091361      | 10.7847659     | 14.5661855     | 1.87E-15  | 2.938411  | up        | PREDICTED: CASP-like protein 4B1 [Sesamum indicum]                                                |
| c28433.graph_c0 | 99.3998819    | 100.29014     | 110.983717    | 90.7246273     | 98.6173285     | 96.3210672     | 1.548E-15 | -1.141111 | down      | PREDICTED: iron-sulfur cluster assembly protein 1-like [Sesamum indicum]                          |
| c28434.graph_c0 | 131.03845     | 116.822983    | 145.114592    | 108.823168     | 80.2383257     | 71.7834552     | 1.836E-13 | -1.603142 | down      | Uncharacterized protein TCM_029816 [Theobroma cacao]                                              |
| c28436.graph_c0 | 0.30932448    | 0             | 0             | 8.89106036     | 6.76235923     | 4.31059631     | 4.418E-08 | 5.025068  | up        | -                                                                                                 |
| c28439.graph_c0 | 33.684611     | 38.1317364    | 28.555201     | 13.3228365     | 10.3272657     | 6.21642601     | 2.074E-24 | -2.754954 | down      | PREDICTED: probable protein phosphatase 2C 23 [Sesamum indicum]                                   |
| c28441.graph_c0 | 0.0333178     | 0             | 0             | 1.81097712     | 2.86150743     | 2.62193337     | 1.592E-14 | 6.77061   | up        | PREDICTED: LOW QUALITY PROTEIN: protein NRT1/PTR FAMILY 2.7-like [Sesamum indicum]                |
| c28442.graph_c0 | 0.6238483     | 0.07805912    | 0.10020872    | 5.24440888     | 5.02306588     | 4.53859572     | 8.505E-08 | 3.204001  | up        | --                                                                                                |
| c28444.graph_c0 | 1.27017838    | 0.9535877     | 1.22417213    | 70.5028129     | 70.0404771     | 76.0084226     | 8.615E-26 | 4.954271  | up        | enolase [Solanum lycopersicum]                                                                    |
| c28444.graph_c1 | 3.93914738    | 4.02698741    | 2.69253209    | 168.014955     | 163.758698     | 176.499151     | 4.33E-134 | 4.561932  | up        | PREDICTED: enolase [Sesamum indicum]                                                              |
| c28449.graph_c0 | 7.05171772    | 7.1367765     | 7.8101154     | 2.83548996     | 5.3613158      | 7.18576494     | 1.243E-09 | -1.546987 | down      | PREDICTED: L-type lectin-domain containing receptor kinase S.1 [Sesamum indicum]                  |
| c28450.graph_c0 | 0.29853022    | 0.22986858    | 0.32460421    | 33.3838663     | 27.6564255     | 27.9729269     | 4.983E-63 | 5.689631  | up        | PREDICTED: beta-galactosidase-like [Sesamum indicum]                                              |
| c28452.graph_c0 | 6.89150819    | 9.14312938    | 6.81760718    | 5.24036756     | 6.67251683     | 7.84613769     | 7.351E-06 | -1.231597 | down      | hypothetical protein MIMGU_mgv1a0119852mg, partial [Erythranthe guttata]                          |
| c28463.graph_c0 | 31.6080866    | 30.7130504    | 32.8000211    | 26.9263358     | 26.4600158     | 24.500948      | 1.196E-09 | -1.305379 | down      | Vacuolar protein sorting-associated protein 32-2-like protein [Morus notabilis]                   |
| c28547.graph_c1 | 0.09233161    | 0.09242407    | 0.05932489    | 6.71989044     | 8.33543153     | 7.45522574     | 1.715E-21 | 5.510862  | up        | PREDICTED: uncharacterized protein LOC105173291 [Sesamum indicum]                                 |
| c28558.graph_c0 | 0.45161367    | 0.7749701     | 0.33162368    | 7.01351487     | 6.67437854     | 6.39924225     | 6.538E-08 | 2.677151  | up        | PREDICTED: thylakoid lumenal 17.9 kDa protein, chloroplastic [Nicotiana tomentosiformis]          |
| c28609.graph_c0 | 0.62932319    | 0.22907395    | 0.51463059    | 48.9381598     | 45.2274393     | 58.5288213     | 1.249E-78 | 5.77846   | up        | PREDICTED: allantoinase [Sesamum indicum]                                                         |
| c28614.graph_c0 | 38.2836168    | 42.6919992    | 25.8926123    | 9.90017259     | 6.88277126     | 12.6631014     | 1.024E-12 | -2.871417 | down      | -                                                                                                 |
| c28655.graph_c0 | 0             | 0             | 0             | 4.72895958     | 4.23902707     | 2.34665758     | 2.303E-08 | Inf       | up        | hypothetical protein PGUG_03256 [Meyerozyma guilliermondii ATCC 6260]                             |
| c28687.graph_c0 | 3.66268429    | 3.86453309    | 3.68903068    | 1.611154       | 3.60686977     | 3.94914888     | 2.181E-05 | -1.321929 | down      | PREDICTED: pentatricopeptide repeat-containing protein At5g50390, chloroplastic [Sesamum indicum] |
| c28687.graph_c1 | 5.44770495    | 5.97561844    | 5.32374611    | 3.45604688     | 4.52086339     | 5.32138067     | 1.133E-07 | -1.355547 | down      | PREDICTED: SWI/SNF complex component SNF12 homolog [Sesamum indicum]                              |
| c28690.graph_c0 | 12.6881673    | 14.885969     | 11.8341271    | 61.6509309     | 71.76962       | 84.1023118     | 4.169E-14 | 1.444511  | up        | PREDICTED: protein TIC 20-I, chloroplastic-like [Sesamum indicum]                                 |

| #ID             | 0 h-1<br>FPKM | 0 h-2<br>FPKM | 0 h-3<br>FPKM | 48 h-1<br>FPKM | 48 h-2<br>FPKM | 48 h-3<br>FPKM | FDR       | log2FC    | regulated | nr_annotation                                                                    |
|-----------------|---------------|---------------|---------------|----------------|----------------|----------------|-----------|-----------|-----------|----------------------------------------------------------------------------------|
| c28741.graph_c0 | 1.65159489    | 1.53923156    | 1.2807374     | 10.4147949     | 14.8406433     | 14.8225665     | 3.242E-16 | 2.142543  | up        | PREDICTED: LOW QUALITY PROTEIN: replication factor C subunit 2 [Sesamum indicum] |
| c28782.graph_c0 | 0.12874747    | 0             | 0.0827228     | 1.30471623     | 2.32458999     | 1.6886235      | 9.155E-08 | 3.626567  | up        | PREDICTED: uncharacterized protein LOC104211388 [Nicotiana sylvestris]           |
| c28785.graph_c0 | 1.07642633    | 0.30785834    | 0.98803604    | 3.68336111     | 4.05215425     | 5.16825904     | 0.0074577 | 1.419777  | up        | -                                                                                |
| c28816.graph_c0 | 6.05164464    | 5.1012248     | 6.54871828    | 120.232937     | 99.4731173     | 99.606689      | 5.492E-32 | 3.15783   | up        | hypothetical protein MIMGU_mgv1a005703mg [Erythranthe guttata]                   |
| c28850.graph_c0 | 31.6129873    | 30.3441781    | 27.6105811    | 6.35264151     | 7.18501255     | 7.18173238     | 1.862E-84 | -3.130447 | down      | PREDICTED: cyclic dof factor 2-like [Sesamum indicum]                            |
| c28909.graph_c0 | 1.53850122    | 1.89543606    | 0.45623884    | 14.1191626     | 17.3830879     | 17.3167688     | 1.41E-14  | 2.638486  | up        | PREDICTED: uncharacterized protein LOC105163227 [Sesamum indicum]                |
| c28984.graph_c0 | 0.26828908    | 0.98471168    | 0.68952418    | 18.7845704     | 21.1219029     | 19.426822      | 2.818E-20 | 3.91098   | up        | PREDICTED: cyclin-dependent kinase inhibitor 7-like isoform X1 [Sesamum indicum] |
| c29044.graph_c0 | 0.15069022    | 0             | 0             | 357.476083     | 360.024807     | 398.866231     | 2.46E-246 | 11.85789  | up        | Gip1-like protein [Populus tomentosa]                                            |
| c29248.graph_c0 | 0.30337157    | 0.49347244    | 0.31674864    | 12.6641947     | 13.9343207     | 17.9519248     | 5.63E-35  | 4.302563  | up        | hypothetical protein MIMGU_mgv1a000889mg [Erythranthe guttata]                   |
| c29266.graph_c0 | 4.15009301    | 3.81044881    | 4.33998615    | 14.7132531     | 18.1847255     | 20.7872814     | 6.022E-09 | 1.102663  | up        | PREDICTED: uncharacterized protein LOC105158344 [Sesamum indicum]                |
| c29280.graph_c1 | 0.10651454    | 0.1599318     | 0.0684377     | 2.7966521      | 3.1186461      | 5.06420228     | 3.891E-08 | 4.017346  | up        | PREDICTED: proteasome subunit beta type-3-A [Sesamum indicum]                    |
| c29287.graph_c0 | 9.62217067    | 10.6168769    | 9.97620215    | 69.2040958     | 77.368526      | 74.3051746     | 2.202E-20 | 1.850655  | up        | hypothetical protein MIMGU_mgv1a016558mg [Erythranthe guttata]                   |
| c29351.graph_c0 | 2.9997934     | 3.3781469     | 2.08804553    | 14.3937778     | 18.1761671     | 24.5903942     | 1.242E-05 | 1.73543   | up        | Rho GDP-dissociation inhibitor 1 [Arabidopsis thaliana]                          |
| c29353.graph_c0 | 37.7367091    | 30.4723635    | 33.7108621    | 226.298966     | 249.594118     | 265.757687     | 1.358E-33 | 1.844018  | up        | hypoteucal protein P1A V U 005 U 1 5 2 5 0 0 g [naseous vulgare]                 |
| c29363.graph_c0 | 47.3257733    | 50.7745232    | 42.7181486    | 11.4656359     | 16.1020386     | 13.9942647     | 2.56E-75  | -2.781879 | down      | PREDICTED: cell division cycle protein 48 homolog [Nicotiana sylvestris]         |
| c29442.graph_c0 | 0.04482006    | 0.40378445    | 0.05759555    | 21.5126949     | 22.3089189     | 24.6897012     | 4.292E-61 | 6.069042  | up        | PREDICTED: uncharacterized protein LOC105176814 [Sesamum indicum]                |
| c29564.graph_c0 | 4.52365339    | 4.8111946     | 3.84078084    | 20.0560195     | 25.8983801     | 26.9506875     | 9.515E-13 | 1.44768   | up        | hypoteucal protein CICLE_V10001580mg [Citrus clamentina]                         |
| c29644.graph_c0 | 0.16175295    | 0.08095746    | 0             | 27.6427224     | 27.3107896     | 32.1542295     | 6.312E-49 | 7.487028  | up        | PREDICTED: homeobox-leucine zipper protein HOX21-like [Sesamum indicum]          |
| c29668.graph_c0 | 13.3825095    | 12.329569     | 15.8281348    | 353.488103     | 365.640549     | 386.683377     | 1.28E-133 | 3.713732  | up        | PREDICTED: 20 kDa chaperonin, chloroplastic-like [Sesamum indicum]               |
| c29678.graph_c1 | 25.479594     | 24.2227282    | 25.5170338    | 8.85172521     | 6.32101472     | 5.48417715     | 8.052E-44 | -2.874051 | down      | PREDICTED: myelin transcription factor 1 [Sesamum indicum]                       |
| c29682.graph_c0 | 0.66166739    | 0.27597081    | 0.14171146    | 6.7052827      | 7.42631732     | 8.18109061     | 7.209E-12 | 3.36123   | up        | PREDICTED: topless-related protein 3-like [Sesamum indicum]                      |
| c29711.graph_c0 | 0.32108971    | 0.16070562    | 0.2063065     | 7.09941086     | 14.1018093     | 10.9670366     | 7.333E-12 | 4.521777  | up        | hypothetical protein MIMGU_mgv1a021530mg [Erythranthe guttata]                   |

| #ID             | 0 h-1<br>FPKM | 0 h-2<br>FPKM | 0 h-3<br>FPKM | 48 h-1<br>FPKM | 48 h-2<br>FPKM | 48 h-3<br>FPKM | FDR       | log2FC    | regulated | nr_annotation                                                                           |
|-----------------|---------------|---------------|---------------|----------------|----------------|----------------|-----------|-----------|-----------|-----------------------------------------------------------------------------------------|
| c29739.graph_c0 | 84.5375655    | 82.962958     | 77.4497364    | 41.4146432     | 42.0618957     | 44.785859      | 5.606E-41 | -1.950718 | down      | PREDICTED: mitochondrial fission 1 protein A [Sesamum indicum]                          |
| c29798.graph_c0 | 2.82753416    | 2.66054358    | 2.10742614    | 11.6699918     | 12.3629413     | 10.3375319     | 0.0004925 | 1.163593  | up        | PREDICTED: chorismate mutase 1, chloroplastic-like isoform X1 [Sesamum indicum]         |
| c29807.graph_c0 | 1.59721223    | 0.9326401     | 2.22352103    | 245.038312     | 321.248738     | 355.509358     | 1.171E-77 | 6.570312  | up        | PREDICTED: annexin D1-like [Sesamum indicum]                                            |
| c29866.graph_c0 | 0             | 0             | 0             | 3.81564786     | 5.41828985     | 7.8015995      | 6.395E-11 | Inf       | up        | isoflavone reductase-like protein 4 isoform 2 [1 neoplasm]                              |
| c29876.graph_c0 | 138.1294      | 140.868528    | 135.528206    | 48.0682347     | 42.0731351     | 38.337265      | 3.921E-78 | -2.703676 | down      | PREDICTED: heat stress transcription factor B-2a-like [Sesamum indicum]                 |
| c29887.graph_c0 | 0.30527121    | 1.22230759    | 0.72853039    | 12.8564916     | 13.5773318     | 16.9092015     | 2.618E-23 | 3.242299  | up        | PREDICTED: ribokinase [Sesamum indicum]                                                 |
| c29995.graph_c0 | 0.38791383    | 0.22188701    | 0.21363627    | 1.42948607     | 2.10929712     | 1.63536186     | 0.0037199 | 1.633251  | up        | PREDICTED: transcription factor bHLH126-like [Sesamum indicum]                          |
| c30053.graph_c0 | 5.74820753    | 5.75396349    | 5.76416777    | 3.55082283     | 3.59952544     | 3.02331542     | 1.256E-11 | -1.779523 | down      | PREDICTED: pentatricopeptide repeat-containing protein At1g31790 [Sesamum indicum]      |
| c30136.graph_c0 | 71.4869259    | 70.6695836    | 61.4800954    | 4.09058502     | 4.55015276     | 5.64165583     | 2.88E-131 | -4.853192 | down      | PREDICTED: peroxisomal membrane protein 15 [Glycine]                                    |
| c30145.graph_c0 | 0.39657595    | 0.5954596     | 0.54146679    | 9.36213563     | 13.9094568     | 17.5547351     | 3.023E-12 | 3.707008  | up        | PREDICTED: oncopeptide transporter 3 [Sesamum indicum]                                  |
| c30224.graph_c0 | 0.47901618    | 0.2996849     | 0.23083304    | 3.58557025     | 4.49973418     | 5.15375352     | 6.575E-07 | 2.696453  | up        | PREDICTED: glucosylase 2 subunit beta [Sesamum indicum]                                 |
| c30289.graph_c0 | 0.59909305    | 0.49065787    | 0.48990982    | 3.26136667     | 8.7704418      | 10.893453      | 0.001578  | 2.82707   | up        | PREDICTED: two-component response regulator ARR8 [Sesamum indicum]                      |
| c30362.graph_c0 | 1.10057778    | 1.00725014    | 1.2930615     | 7.24231451     | 6.07650441     | 6.39261456     | 4.015E-06 | 1.518527  | up        | PREDICTED: putative E3 ubiquitin-protein ligase XBAT34 isoform X2 [Sesamum indicum]     |
| c30461.graph_c0 | 1.40598168    | 2.5802142     | 2.10786582    | 25.7977005     | 28.9304288     | 29.0054431     | 1.97E-14  | 2.759184  | up        | PREDICTED: trafficking protein particle complex subunit 2-like protein [Vitis vinifera] |
| c30494.graph_c0 | 1.7030138     | 1.42059926    | 0.36474003    | 10.7210038     | 8.03342693     | 10.2374958     | 0.0004866 | 2.052928  | up        | -                                                                                       |
| c30514.graph_c1 | 1.92862843    | 2.46454425    | 2.3729016     | 11.6057647     | 11.5740268     | 13.152297      | 4.083E-07 | 1.405248  | up        | PREDICTED: uncharacterized protein LOC105170005 [Sesamum indicum]                       |
| c30648.graph_c0 | 1.00648748    | 1.00749532    | 1.50893897    | 0.5151344      | 1.09144486     | 0.91672698     | 0.0038249 | -1.515268 | down      | PREDICTED: WEB family protein At1g75720 [Sesamum indicum]                               |
| c30774.graph_c0 | 0.36960455    | 0.09249366    | 0.23747824    | 8.17209167     | 7.93589519     | 9.84679316     | 3.414E-19 | 4.196358  | up        | PREDICTED: probable 6-phosphogluconolactonase 4, chloroplastic [Sesamum indicum]        |
| c30802.graph_c0 | 1.93148443    | 1.41288276    | 1.43194267    | 9.30768014     | 10.150369      | 11.1440512     | 4.043E-05 | 1.662055  | up        | -                                                                                       |
| c30813.graph_c0 | 0.36799448    | 0.49115063    | 0.55170206    | 2.54265388     | 2.09504826     | 2.66464936     | 0.0095241 | 1.352886  | up        | --                                                                                      |
| c30953.graph_c0 | 4.2618401     | 2.80807088    | 2.07973415    | 18.0907312     | 20.1653037     | 21.624848      | 2.258E-10 | 1.696291  | up        | PREDICTED: protein sym-1-like [Sesamum indicum]                                         |
| c30987.graph_c0 | 0.55284466    | 0.69174781    | 0.17760682    | 18.8447127     | 19.1543494     | 22.8292857     | 1.758E-28 | 4.409255  | up        | -                                                                                       |
| c30990.graph_c0 | 0             | 0             | 0             | 1.40234393     | 2.0374126      | 1.03388911     | 2.379E-11 | Inf       | up        | PREDICTED: sucrose synthase 5-like [Sesamum indicum]                                    |
| c31084.graph_c0 | 0.71505966    | 0.63624506    | 0.61258665    | 6.73398704     | 10.7007641     | 9.63908102     | 8.854E-09 | 2.761307  | up        | PREDICTED: uncharacterized protein LOC105169539 [Sesamum indicum]                       |

| #ID             | 0 h-1<br>FPKM | 0 h-2<br>FPKM | 0 h-3<br>FPKM | 48 h-1<br>FPKM | 48 h-2<br>FPKM | 48 h-3<br>FPKM | FDR       | log2FC    | regulated | nr_annotation                                                                                          |
|-----------------|---------------|---------------|---------------|----------------|----------------|----------------|-----------|-----------|-----------|--------------------------------------------------------------------------------------------------------|
| c31162.graph_c0 | 0.12962359    | 0.19463008    | 0.33314288    | 2.86602483     | 4.80732583     | 4.9409576      | 2.077E-08 | 3.226531  | up        | -                                                                                                      |
| c31209.graph_c0 | 3.6357687     | 3.2438214     | 2.84389105    | 1.82038438     | 1.85133746     | 1.49018571     | 1.988E-05 | -1.9275   | down      | hypothetical protein MIMGU_mgv1a021709mg [Erythranthe guttata]                                         |
| c31272.graph_c0 | 7.02627349    | 9.43944135    | 8.3162207     | 8.34684237     | 8.21086257     | 5.38076409     | 0.0003689 | -1.190452 | down      | PREDICTED: choline-phosphate cytidylyltransferase 2-like isoform X1 [Sesamum indicum]                  |
| c31286.graph_c0 | 0             | 0             | 0             | 2.12313101     | 2.27803575     | 3.41500048     | 5.627E-17 | Inf       | up        | PREDICTED: kinesin KIF1-like isoform A2 [Sesamum indicum]                                              |
| c31392.graph_c0 | 0.25057653    | 0.18812058    | 0.16100038    | 1.38508465     | 1.58960668     | 1.28379166     | 0.0012359 | 1.813185  | up        | PREDICTED: transcription repressor MYB5-like [Sesamum indicum]                                         |
| c31417.graph_c0 | 1.83118465    | 0.6110061     | 1.08606682    | 5.14753339     | 6.00308872     | 7.62091062     | 0.0004621 | 1.392339  | up        | PREDICTED: probable polygalacturonase [Sesamum indicum]                                                |
| c31482.graph_c0 | 1.98169641    | 1.7569744     | 2.54655834    | 34.7398537     | 38.0736254     | 36.8986393     | 2.658E-41 | 3.10332   | up        | hypothetical protein MIMGU_mgv1a010578mg [Erythranthe guttata]                                         |
| c31565.graph_c0 | 0.74818645    | 0.27234023    | 0.87404474    | 3.00775924     | 3.71741557     | 4.68350065     | 0.0015383 | 1.562076  | up        | PREDICTED: dual specificity tyrosine-phosphorylation-regulated kinase 3-like isoform X3 [Cucumis melo] |
| c31628.graph_c0 | 38.3451462    | 42.4442705    | 36.9873029    | 29.5421877     | 33.7472859     | 35.1541827     | 1.9E-13   | -1.278136 | down      | hypothetical protein MIMGU_mgv1a014722mg [Erythranthe guttata]                                         |
| c31685.graph_c0 | 0.6702548     | 0.31309878    | 0.8038837     | 11.5263389     | 12.9085161     | 11.0252721     | 9.7E-20   | 3.287176  | up        | PREDICTED: uncharacterized protein At1g04910 [Sesamum indicum]                                         |
| c31685.graph_c1 | 0.23303277    | 0.93306445    | 0.49909388    | 12.451729      | 11.3716354     | 11.9709255     | 1.965E-13 | 3.409578  | up        | PREDICTED: uncharacterized protein At1g04910 [Sesamum indicum]                                         |
| c31695.graph_c0 | 1.26413638    | 0.67488118    | 0.32489306    | 3.72673564     | 5.75753575     | 5.25037602     | 0.00168   | 1.688284  | up        | hypothetical protein MIMGU_mgv1a022283mg [Erythranthe guttata]                                         |
| c31852.graph_c1 | 1.81190232    | 1.40150833    | 1.37585276    | 5.34916377     | 6.18926043     | 8.20280753     | 0.0026449 | 1.08468   | up        | PREDICTED: uracil-DNA glycosylase [Sesamum indicum]                                                    |
| c31982.graph_c0 | 9.82888783    | 10.3481788    | 10.4232364    | 48.9380938     | 54.3275201     | 49.2551904     | 5.978E-18 | 1.298252  | up        | PREDICTED: LOW QUALITY PROTEIN: probable phenylalanine--tRNA ligase alpha subunit [Sesamum indicum]    |
| c32009.graph_c0 | 3.39750251    | 2.93411377    | 4.02349973    | 21.9100064     | 21.2604913     | 23.9733251     | 3.797E-10 | 1.676618  | up        | hypothetical protein MIMGU_mgv1a016742mg [Erythranthe guttata]                                         |
| c32020.graph_c0 | 2.30050561    | 1.66953668    | 1.77374447    | 18.8094604     | 19.6456898     | 18.8109334     | 5.865E-15 | 2.301412  | up        | PREDICTED: uncharacterized protein LOC105165412 [Sesamum indicum]                                      |
| c32191.graph_c0 | 0.73024081    | 0.73097204    | 1.02369639    | 5.8100745      | 5.8311184      | 6.25814185     | 7.19E-05  | 1.826738  | up        | PREDICTED: structure-specific endonuclease subunit SLX1 homolog [Sesamum indicum]                      |
| c32206.graph_c0 | 1.65948116    | 1.42383676    | 2.38636793    | 63.3369234     | 72.4964631     | 83.5635512     | 1.024E-74 | 4.300066  | up        | PREDICTED: magnesium-chelatase subunit ChII, chloroplastic-like [Sesamum indicum]                      |
| c32223.graph_c0 | 3.31717611    | 3.73555998    | 3.06381752    | 13.4654956     | 14.5685717     | 15.125603      | 0.0001245 | 1.075066  | up        | PREDICTED: cell division topological specificity factor homolog, chloroplastic-like [Sesamum indicum]  |
| c32244.graph_c0 | 5.81760121    | 5.5128439     | 5.88100033    | 37.8027187     | 36.7921262     | 34.8447527     | 6.728E-13 | 1.651905  | up        | PREDICTED: calcineurin subunit B-like isoform X1 [Sesamum indicum]                                     |

| #ID             | 0 h-1<br>FPKM | 0 h-2<br>FPKM | 0 h-3<br>FPKM | 48 h-1<br>FPKM | 48 h-2<br>FPKM | 48 h-3<br>FPKM | FDR       | log2FC    | regulated | nr_annotation                                                                                     |
|-----------------|---------------|---------------|---------------|----------------|----------------|----------------|-----------|-----------|-----------|---------------------------------------------------------------------------------------------------|
| c32266.graph_c0 | 19.0759164    | 20.8309287    | 17.363593     | 17.307706      | 21.2267699     | 19.2503659     | 3.008E-07 | -1.00633  | down      | PREDICTED: uncharacterized protein LOC105169439 [Sesamum indicum]                                 |
| c32277.graph_c0 | 9.54324801    | 11.5998336    | 10.3920807    | 67.1949493     | 50.4100382     | 40.689481      | 0.000888  | 1.317623  | up        | hypothetical protein MIMGU_mgv1a005557mg [Erythranthe guttata]                                    |
| c32295.graph_c0 | 1.02712074    | 0.69914149    | 0.52795633    | 0              | 0              | 0              | 7.353E-17 | -Inf      | down      | --                                                                                                |
| c32333.graph_c0 | 1.64870335    | 1.2519929     | 0.94973924    | 8.27534842     | 10.8196962     | 8.24882203     | 4.372E-06 | 1.81224   | up        | Alpha-soluble NSF attachment protein 2 [Theobroma cacao]                                          |
| c32363.graph_c0 | 0.31077455    | 0.27220002    | 0.1497591     | 2.71990494     | 4.24628766     | 6.97386788     | 0.000171  | 3.228028  | up        | PREDICTED: omega-3 fatty acid desaturase, endoplasmic reticulum [Sesamum indicum]                 |
| c32363.graph_c1 | 0.15991793    | 0.37351548    | 0.41100174    | 6.1877267      | 9.31246952     | 9.91918299     | 2.393E-15 | 3.719115  | up        | PREDICTED: disease resistance response protein 206-like [Sesamum indicum]                         |
| c32364.graph_c0 | 1.01538057    | 1.01639732    | 0.86986949    | 8.93859928     | 5.94587852     | 9.15578695     | 6.148E-05 | 2.038877  | up        | CTP synthase 1a [Malus domestica]                                                                 |
| c32388.graph_c1 | 8.14392261    | 7.45663962    | 7.34056361    | 43.8073082     | 54.2060685     | 55.1154652     | 1.274E-26 | 1.718027  | up        | hypothetical protein CICLE_V10011950mg [Cytisus alantinal]                                        |
| c32392.graph_c0 | 1.47489552    | 1.29182586    | 1.73735755    | 0.79261581     | 0.65974884     | 0.906769       | 0.0001397 | -1.951931 | down      | hypothetical protein MIMGU_mgv1a018953mg, partial [Erythranthe guttata]                           |
| c32414.graph_c0 | 1.24662515    | 1.31532607    | 0.82262948    | 126.207804     | 96.54419       | 102.798002     | 4.979E-46 | 5.579545  | up        | hypothetical protein MIMGU_mgv1a007303mg [Erythranthe guttata]                                    |
| c32432.graph_c0 | 9.63233761    | 8.06420392    | 8.2519568     | 70.3461242     | 67.2303995     | 76.0406453     | 1.551E-33 | 2.024821  | up        | PREDICTED: tetradoxin, root K-B1-like [Sesamum indicum]                                           |
| c32432.graph_c1 | 0.86034665    | 1.00474285    | 0.73705301    | 6.07665713     | 7.27715289     | 9.40343126     | 0.0001041 | 2.108086  | up        | PREDICTED: glucan endo-1,3-beta-glucosidase 14-like [Sesamum indicum]                             |
| c32453.graph_c1 | 6.1624421     | 6.42563839    | 5.54328746    | 30.6098051     | 33.27941       | 34.3086286     | 5.278E-13 | 1.419252  | up        | PREDICTED: mitochondrial import inner membrane translocase subunit TIM17-2-like [Sesamum indicum] |
| c32471.graph_c0 | 16.6823588    | 17.4124218    | 15.5265716    | 10.0569157     | 11.8238188     | 10.8338929     | 2.105E-22 | -1.619945 | down      | PREDICTED: double-stranded RNA-binding protein 3-like isoform X1 [Sesamum indicum]                |
| c32488.graph_c0 | 2.38068354    | 3.40438205    | 2.07593498    | 33.1336044     | 33.1924693     | 37.0791197     | 9.512E-22 | 2.701921  | up        | PREDICTED: 30S ribosomal protein S31, chloroplastic [Sesamum indicum]                             |
| c32509.graph_c0 | 167.441543    | 163.402152    | 166.561554    | 813.417055     | 817.416754     | 886.801818     | 2.099E-21 | 1.321391  | up        | -                                                                                                 |
| c32527.graph_c0 | 14.108203     | 13.2317329    | 10.8614267    | 3.27862263     | 4.15555909     | 3.02148794     | 5.418E-27 | -2.886589 | down      | PREDICTED: uncharacterized protein LOC105173965 [Sesamum indicum]                                 |
| c32529.graph_c0 | 2.62442529    | 3.15246391    | 3.56520414    | 150.732046     | 183.100448     | 172.660126     | 2.02E-148 | 4.737352  | up        | PREDICTED: FKBP-binding protein L-like [Sesamum indicum]                                          |
| c32549.graph_c0 | 14.6502265    | 10.7778155    | 9.52647094    | 81.630911      | 90.2679268     | 106.781681     | 4.989E-18 | 1.977982  | up        | vacuolar ATPase subunit c [Cucumis sativus]                                                       |
| c32550.graph_c0 | 3.6642444     | 3.95748571    | 3.46956778    | 14.3913167     | 18.1632716     | 14.6233444     | 0.0029514 | 1.069244  | up        | hypothetical protein MIMGU_mgv1a022013mg [Erythranthe guttata]                                    |
| c32563.graph_c0 | 22.282251     | 22.0951308    | 17.7447506    | 2.31299865     | 2.34824404     | 2.05809229     | 3.882E-44 | -4.223068 | down      | -                                                                                                 |
| c32583.graph_c0 | 4.48330449    | 3.93450419    | 4.02496455    | 24.5555566     | 38.4809988     | 40.2250228     | 3.516E-09 | 2.027937  | up        | PREDICTED: carteroyin/kimate esterase [Sesamum indicum]                                           |
| c32594.graph_c0 | 24.8678592    | 17.1878585    | 15.5976611    | 0              | 0              | 0              | 2.665E-29 | -Inf      | down      | -                                                                                                 |
| c32600.graph_c0 | 11.1649506    | 9.61147237    | 8.60844217    | 12.6859196     | 7.55500613     | 5.67443521     | 5.53E-05  | -1.183286 | down      | hypothetical protein JCGZ_03792 [Jatropha curcas]                                                 |



| #ID             | 0 h-1<br>FPKM | 0 h-2<br>FPKM | 0 h-3<br>FPKM | 48 h-1<br>FPKM | 48 h-2<br>FPKM | 48 h-3<br>FPKM | FDR       | log2FC    | regulated | nr_annotation                                                                                 |
|-----------------|---------------|---------------|---------------|----------------|----------------|----------------|-----------|-----------|-----------|-----------------------------------------------------------------------------------------------|
| c32609.graph_c0 | 7.67890211    | 8.43650272    | 8.18296511    | 64.1863814     | 72.5674252     | 64.6355598     | 1.474E-13 | 2.031819  | up        | hypothetical protein MIMGU_mgv1a016321mg [Erythranthe guttata]                                |
| c32611.graph_c0 | 39.6636704    | 37.8349929    | 36.1782706    | 17.7688403     | 14.5733665     | 12.1129652     | 5.372E-24 | -2.365649 | down      | -                                                                                             |
| c32612.graph_c0 | 0.10284691    | 0.82359916    | 0.5286494     | 4.4532162      | 3.31238734     | 3.11937159     | 0.0007044 | 1.888415  | up        | -                                                                                             |
| c32620.graph_c0 | 2.02307321    | 1.53757518    | 2.02201158    | 16.774083      | 18.7207711     | 18.2115402     | 3.626E-20 | 2.245759  | up        | tyrosine aminotransferase [Perilla frutescens]                                                |
| c32655.graph_c0 | 3.88549272    | 3.05049683    | 2.44755489    | 0.98262687     | 1.56146103     | 1.93602857     | 5.183E-06 | -2.089514 | down      | hypothetical protein AMTR_s00033p00078670, partial [Amborella trichopoda]                     |
| c32658.graph_c0 | 1.90706085    | 0.82998717    | 1.1187744     | 0              | 0              | 0              | 6.711E-11 | -Inf      | down      | Glucose-6-phosphate isomerase 2 [Neocallimastix frontalis]                                    |
| c32693.graph_c0 | 1.19626477    | 0.61491325    | 0.66475571    | 5.71888672     | 5.995358       | 5.98974276     | 9.543E-07 | 1.824026  | up        | PREDICTED: BTB/POZ domain-containing protein At3g05675 isoform X2 [Sesamum indicum]           |
| c32721.graph_c0 | 1.13821912    | 1.22481079    | 1.42609022    | 4.56141737     | 5.80427665     | 6.60125433     | 0.000374  | 1.137787  | up        | PREDICTED: histone-lysine N-methyltransferase setd3 [Sesamum indicum]                         |
| c32725.graph_c0 | 0.3001718     | 0.26291333    | 0.48216581    | 24.7501367     | 30.5775236     | 31.5881717     | 2.542E-84 | 5.349992  | up        | PREDICTED: putative E3 ubiquitin-protein ligase XBAT31 [Sesamum indicum]                      |
| c32747.graph_c1 | 6.03968112    | 4.45474765    | 4.79970763    | 3.22134895     | 2.32679223     | 0.91201629     | 2.978E-08 | -2.246198 | down      | PREDICTED: protein ODORANT11-like [Sesamum indicum]                                           |
| c32759.graph_c0 | 16.6886803    | 16.2864475    | 15.1262174    | 12.9648731     | 14.7558791     | 13.5087763     | 6.282E-11 | -1.24067  | down      | hypothetical protein MIMGU_mgv1a024738mg [Erythranthe guttata]                                |
| c32765.graph_c0 | 2.98241767    | 1.83717176    | 2.21107199    | 8.50698515     | 11.4750587     | 10.766505      | 0.0013277 | 1.107983  | up        | hypothetical protein MIMGU_mgv1a014004mg [Erythranthe guttata]                                |
| c32792.graph_c1 | 9.29295874    | 9.2530459     | 8.52987136    | 6.56817757     | 4.65478763     | 2.98262098     | 3.828E-14 | -1.936513 | down      | PREDICTED: alpha/beta hydrolase domain-containing protein 17C-like [Sesamum indicum]          |
| c32815.graph_c0 | 1.06229048    | 0.54686788    | 0.62403901    | 0              | 0              | 0              | 8.366E-13 | -Inf      | down      | PREDICTED: aldehyde dehydrogenase family 2 member B7, mitochondrial-like [Solanum tuberosum]  |
| c32819.graph_c0 | 5.50723908    | 2.78958623    | 2.72848974    | 0              | 0              | 0              | 7.751E-13 | -Inf      | down      | --                                                                                            |
| c32832.graph_c0 | 4.05438797    | 3.70296334    | 3.72689641    | 66.115176      | 77.4639152     | 82.0208097     | 2.5E-95   | 3.275801  | up        | Cytochrome P450 77A3 [Morus notabilis]                                                        |
| c32838.graph_c0 | 10.3007404    | 10.2225481    | 9.48736261    | 7.20892429     | 8.37047653     | 8.51637011     | 1.316E-09 | -1.3362   | down      | PREDICTED: r-box protein SKP19-like [Sesamum indicum]                                         |
| c32844.graph_c0 | 36.8034373    | 33.7666071    | 31.1722436    | 31.2789424     | 33.3931168     | 31.7872407     | 1.359E-13 | -1.093761 | down      | PREDICTED: uncharacterized protein LOC105156000 [Sesamum indicum]                             |
| c32856.graph_c0 | 1.478013      | 0.87029       | 1.00551453    | 7.12859625     | 6.87306237     | 5.91536531     | 0.0013199 | 1.55709   | up        | -                                                                                             |
| c32883.graph_c0 | 1.50947781    | 0.94436833    | 0.60616836    | 15.8184096     | 15.6527845     | 19.4886356     | 7.506E-13 | 3.046323  | up        | PREDICTED: uncharacterized protein LOC105167888 isoform X3 [Sesamum indicum]                  |
| c32889.graph_c0 | 1.38257699    | 0.5766506     | 0.61689797    | 0              | 0              | 0              | 5.046E-09 | -Inf      | down      | phosphoenolpyruvate carboxylase [Dendrobium catenatum]                                        |
| c32893.graph_c0 | 0.67508453    | 0.59129046    | 0.54219396    | 3.80933287     | 3.62373788     | 5.11886918     | 0.0008486 | 1.777534  | up        | -                                                                                             |
| c32893.graph_c1 | 0.59268189    | 1.18655074    | 0.30464788    | 4.58654459     | 5.09026346     | 5.63577686     | 0.000159  | 1.865087  | up        | PREDICTED: RNA polymerase sigma factor sigE, chloroplast/mitochondrial-like [Sesamum indicum] |
| c32901.graph_c0 | 13.7382669    | 11.4167744    | 10.0762276    | 7.46261061     | 10.2458274     | 11.8460919     | 1.553E-07 | -1.275005 | down      | -                                                                                             |

| #ID             | 0 h-1<br>FPKM | 0 h-2<br>FPKM | 0 h-3<br>FPKM | 48 h-1<br>FPKM | 48 h-2<br>FPKM | 48 h-3<br>FPKM | FDR       | log2FC    | regulated | nr_annotation                                                                                          |
|-----------------|---------------|---------------|---------------|----------------|----------------|----------------|-----------|-----------|-----------|--------------------------------------------------------------------------------------------------------|
| c32907.graph_c0 | 0             | 0             | 0             | 2.45244438     | 2.44523995     | 2.11798878     | 2.065E-11 | Inf       | up        | PREDICTED: LOW QUALITY PROTEIN: anthranilate synthase alpha subunit 1, chloroplastic [Sesamum indicum] |
| c32928.graph_c0 | 1.4789883     | 1.0908721     | 1.00029396    | 8.46209356     | 7.67305734     | 6.18952065     | 0.0003906 | 1.633902  | up        | -                                                                                                      |
| c32947.graph_c0 | 110.849502    | 116.44729     | 113.390789    | 44.6811018     | 69.6400378     | 66.6561202     | 2.978E-39 | -1.937772 | down      | PREDICTED: uncharacterized protein LOC105174506 [Sesamum indicum]                                      |
| c32955.graph_c0 | 2.34736609    | 4.06681723    | 2.55238785    | 0              | 0.02202842     | 0              | 1.75E-23  | -9.720335 | down      | Uncharacterized protein TCM_033752 [Theobroma cacao]                                                   |
| c32968.graph_c0 | 7.2876849     | 5.37227387    | 6.24330909    | 28.9373893     | 39.0914738     | 48.3012455     | 1.155E-06 | 1.597794  | up        | PREDICTED: transcription factor DIVARICATA [Sesamum indicum]                                           |
| c32986.graph_c0 | 0.68964474    | 0.86291914    | 0.92314666    | 0.02647274     | 0.02804466     | 0.07066585     | 6.037E-16 | -5.334103 | down      | PREDICTED: nucleoprotein TPR-like [Phoenix dactylifera]                                                |
| c32989.graph_c1 | 3.35152678    | 1.54143265    | 2.59962693    | 0              | 0              | 0              | 2.267E-17 | -Inf      | down      | hypothetical protein CHLNDKAF1_05990 [Chlorella variabilis]                                            |
| c32997.graph_c0 | 7.35476974    | 6.58717291    | 5.47173018    | 498.905019     | 440.504108     | 510.876        | 3.77E-108 | 5.209643  | up        | -                                                                                                      |
| c32998.graph_c0 | 203.362964    | 201.806297    | 195.028611    | 21.0611015     | 18.4500458     | 12.8966494     | 4.13E-175 | -4.529216 | down      | PREDICTED: cytochrome P450 CYP82D47-like [Sesamum indicum]                                             |
| c33046.graph_c0 | 1.31151944    | 1.14159368    | 1.90518324    | 7.51220813     | 10.6852345     | 10.8912308     | 2.502E-06 | 1.709765  | up        | PREDICTED: E3 ubiquitin-protein ligase RING1-like [Sesamum indicum]                                    |
| c33052.graph_c0 | 0.68591139    | 0.21126099    | 0.40681075    | 2.74636202     | 4.53151335     | 4.00074192     | 5.085E-07 | 2.089822  | up        | PREDICTED: uncharacterized protein LOC105165576 [Sesamum indicum]                                      |
| c33085.graph_c0 | 12.9225782    | 14.7560727    | 11.9317362    | 8.4658645      | 10.9304287     | 10.6715734     | 4.068E-07 | -1.418288 | down      | PREDICTED: uncharacterized protein LOC105171255 [Sesamum indicum]                                      |
| c33101.graph_c1 | 3.10871924    | 4.38485439    | 2.90532894    | 0.78107862     | 0.96536776     | 1.96916399     | 1.186E-06 | -2.509308 | down      | PREDICTED: E3 ubiquitin-protein ligase RHA1B-like [Sesamum indicum]                                    |
| c33104.graph_c0 | 1.56109463    | 1.11618416    | 1.0030342     | 0              | 0.38089491     | 0.4113276      | 2.651E-09 | -3.25887  | down      | hypothetical protein MIMGU_mgv1a001430mg [Erythranthe guttata]                                         |
| c33108.graph_c0 | 1.11620127    | 1.02610926    | 1.02454487    | 43.6090526     | 53.6907535     | 53.0694576     | 1.15E-139 | 4.548707  | up        | unnamed protein product [Coffea canephora]                                                             |
| c33114.graph_c0 | 3.43614575    | 4.28702089    | 5.24750482    | 2.66094046     | 3.69378838     | 4.4496221      | 0.0003611 | -1.292077 | down      | PREDICTED: uncharacterized protein LOC105172002 isoform X2 [Sesamum indicum]                           |
| c33115.graph_c0 | 2.63172072    | 1.39465905    | 1.88986591    | 0              | 0              | 0              | 1.606E-21 | -Inf      | down      | --                                                                                                     |
| c33120.graph_c0 | 9.81077428    | 10.177711     | 5.95978305    | 261.618431     | 160.076751     | 121.437936     | 2.971E-05 | 3.387708  | up        | PREDICTED: universal stress protein A-like protein [Sesamum indicum]                                   |
| c33125.graph_c0 | 9.02732222    | 8.25736501    | 8.60034582    | 1.00372252     | 1.0633223      | 0.76551965     | 6.651E-17 | -4.207934 | down      | -                                                                                                      |
| c33132.graph_c0 | 0             | 0             | 0.10843565    | 1.7102632      | 1.4823953      | 1.66012572     | 2.144E-08 | 4.435937  | up        | -                                                                                                      |
| c33148.graph_c0 | 1.38654401    | 0.76701529    | 0.70332787    | 0              | 0              | 0              | 4.34E-12  | -Inf      | down      | PREDICTED: serpin-ZX-like isoform X2 [Pyrus x bretschneideri]                                          |
| c33167.graph_c0 | 6.35116868    | 6.61182955    | 9.14088359    | 2.34044434     | 3.47118378     | 3.33202128     | 7.123E-06 | -2.301729 | down      | hypothetical protein EUGKSUZ_AU2007 [Eucalyptus grandis]                                               |
| c33253.graph_c0 | 3.90726761    | 3.64601539    | 4.93589198    | 1.09819213     | 1.61583528     | 3.31150279     | 1.185E-06 | -2.083473 | down      | PREDICTED: uncharacterized protein LOC105179909 [Sesamum indicum]                                      |

| #ID             | 0 h-1<br>FPKM | 0 h-2<br>FPKM | 0 h-3<br>FPKM | 48 h-1<br>FPKM | 48 h-2<br>FPKM | 48 h-3<br>FPKM | FDR       | log2FC    | regulated | nr_annotation                                                                                          |
|-----------------|---------------|---------------|---------------|----------------|----------------|----------------|-----------|-----------|-----------|--------------------------------------------------------------------------------------------------------|
| c33275.graph_c0 | 0             | 0             | 0             | 0.7839442      | 1.55266235     | 1.39509766     | 7.877E-10 | Inf       | up        | PREDICTED: amino acid permease 6 [Sesamum indicum]                                                     |
| c33309.graph_c0 | 6.61061767    | 6.61723721    | 6.04445194    | 3.22074298     | 3.90827562     | 2.65737608     | 4.564E-09 | -1.99524  | down      | PREDICTED: transcription factor DIVARICATA-like [Sesamum indicum]                                      |
| c33310.graph_c0 | 0.06813807    | 0             | 0.02918671    | 24.1467712     | 42.4052358     | 49.0595255     | 1.353E-26 | 9.191185  | up        | PREDICTED: beta-xylosidase/alpha-L-arabinofuranosidase 2-like [Sesamum indicum]                        |
| c33328.graph_c0 | 0.30731526    | 0.30762299    | 0.23694737    | 2.20832714     | 3.17925913     | 4.88719877     | 0.0002059 | 2.568205  | up        | PREDICTED: uncharacterized protein LOC105177453 isoform X1 [Sesamum indicum]                           |
| c33329.graph_c0 | 3.67809447    | 3.02931062    | 2.45299212    | 2.65932953     | 2.63547994     | 3.47305231     | 0.0035472 | -1.0791   | down      | PREDICTED: uncharacterized protein LOC105171097 [Sesamum indicum]                                      |
| c33366.graph_c0 | 2.11798459    | 2.48207465    | 1.92510067    | 65.5802149     | 86.3134811     | 95.1092673     | 1.13E-41  | 4.220851  | up        | PREDICTED: lamin-like protein-like [Solanum tuberosum]                                                 |
| c33370.graph_c0 | 7.72416574    | 8.75524007    | 8.32020516    | 36.36488       | 32.9257028     | 32.2641371     | 1.156E-07 | 1.018272  | up        | PREDICTED: probable 6-phosphogluconolactonase 1 [Solanum lycopersicum]                                 |
| c33380.graph_c0 | 0             | 0             | 0             | 1.2761206      | 0.91451723     | 1.83681306     | 2.246E-08 | Inf       | up        | PREDICTED: protein PHYTOCHROME KINASE SUBSTRATE 4-like [Sesamum indicum]                               |
| c33390.graph_c0 | 30.1209212    | 23.5398819    | 32.0197259    | 24.061735      | 19.0446194     | 22.2302932     | 1.317E-08 | -1.406778 | down      | Uncharacterized protein isoform 2, partial [Lycopersicon                                               |
| c33412.graph_c0 | 10.3104198    | 12.384893     | 8.89595703    | 38.0623724     | 64.7603278     | 93.8756274     | 0.0069069 | 1.611816  | up        | PREDICTED: plastidic ATP/ADP-transporter-like [Nicotiana glauca]                                       |
| c33412.graph_c1 | 6.9414468     | 8.6468948     | 7.58202887    | 25.3309631     | 45.8417001     | 59.9046939     | 0.0054325 | 1.470949  | up        | PREDICTED: plastidic ATP/ADP-transporter [Sesamum indicum]                                             |
| c33413.graph_c0 | 7.32342005    | 7.59492464    | 7.12175059    | 3.0391046      | 5.40886553     | 5.1379363      | 8.938E-08 | -1.724712 | down      | PREDICTED: pentatricopeptide repeat-containing protein At1g12775, mitochondrial-like [Sesamum indicum] |
| c33416.graph_c0 | 0             | 0             | 0             | 2.36530848     | 3.47151824     | 4.69158723     | 3.071E-15 | Inf       | up        | PREDICTED: uncharacterized protein LOC105176193 [Sesamum indicum]                                      |
| c33420.graph_c0 | 2.97469568    | 2.90999996    | 2.60631935    | 11.5432494     | 13.482332      | 12.4694279     | 2.961E-08 | 1.124227  | up        | PREDICTED: ceramide kinase isoform 2, partial [Sesamum indicum]                                        |
| c33421.graph_c0 | 16.2218277    | 17.6521978    | 15.7125177    | 12.2967627     | 10.1743168     | 10.9815183     | 4.668E-17 | -1.581443 | down      | PREDICTED: C-terminal binding protein AN-like isoform X2 [Sesamum indicum]                             |
| c33422.graph_c0 | 2.06308793    | 1.00128669    | 2.89216327    | 13.7077266     | 13.24035       | 15.0669474     | 2.476E-08 | 1.793955  | up        | hypothetical protein MIMGU_mgv1a008498mg [Erythranthe guttata]                                         |
| c33425.graph_c0 | 3.10626215    | 2.37570041    | 1.92855959    | 10.1927656     | 10.8320623     | 12.3596448     | 1.77E-05  | 1.156004  | up        | PREDICTED: uncharacterized protein LOC105176055 isoform X2 [Sesamum indicum]                           |
| c33426.graph_c1 | 26.7865892    | 29.9615453    | 23.1336979    | 10.7901852     | 12.2776256     | 9.24544774     | 8.958E-24 | -2.321686 | down      | PREDICTED: dnaJ homolog subfamily C member 21 [Sesamum indicum]                                        |
| c33429.graph_c0 | 268.414368    | 245.710036    | 279.17083     | 113.440201     | 118.759832     | 125.302852     | 7.667E-48 | -2.169387 | down      | hypothetical protein MIMGU_mgv1a013716mg [Erythranthe guttata]                                         |
| c33432.graph_c0 | 0.44987949    | 0.39028598    | 0.30832691    | 10.554872      | 10.2741992     | 11.2109888     | 2.06E-29  | 3.787921  | up        | PREDICTED: WEB family protein At2g38370 [Sesamum indicum]                                              |

| #ID             | 0 h-1<br>FPKM | 0 h-2<br>FPKM | 0 h-3<br>FPKM | 48 h-1<br>FPKM | 48 h-2<br>FPKM | 48 h-3<br>FPKM | FDR       | log2FC    | regulated | nr_annotation                                                                                     |
|-----------------|---------------|---------------|---------------|----------------|----------------|----------------|-----------|-----------|-----------|---------------------------------------------------------------------------------------------------|
| c33433.graph_c0 | 81.8200111    | 78.4391756    | 87.4572317    | 54.593575      | 51.2297214     | 54.1251732     | 4.859E-29 | -1.648599 | down      | PREDICTED: uncharacterized protein LOC105158873 [Sesamum indicum]                                 |
| c33444.graph_c0 | 1.09699236    | 0.93541071    | 1.30525797    | 6.81233354     | 10.9838739     | 7.46039805     | 5.853E-07 | 1.893349  | up        | PREDICTED: uncharacterized protein LOC105178046 isoform X1 [Sesamum indicum]                      |
| c33454.graph_c0 | 2.74468706    | 3.32584291    | 3.52703154    | 0.13308341     | 0.56394293     | 0.11841682     | 1.945E-13 | -4.594543 | down      | -                                                                                                 |
| c33454.graph_c1 | 3.1991485     | 2.73141785    | 3.14373072    | 1.04021092     | 1.28564022     | 1.07983565     | 9.855E-07 | -2.434445 | down      | -                                                                                                 |
| c33455.graph_c0 | 1.48042556    | 1.55083393    | 1.37150161    | 14.2412837     | 14.5828961     | 13.7724779     | 1.711E-17 | 2.25782   | up        | hypothetical protein MIMGU_mgv1a006888mg [Erythranthe guttata]                                    |
| c33456.graph_c0 | 3.85122789    | 3.85508431    | 2.41603763    | 61.7128909     | 139.159883     | 202.793179     | 2.268E-05 | 4.289879  | up        | PREDICTED: hexose carrier protein HEX6-like [Sesamum indicum]                                     |
| c33458.graph_c0 | 1.94462046    | 2.50890948    | 2.08242856    | 23.0308718     | 20.982216      | 21.5554485     | 2.796E-37 | 2.311048  | up        | PREDICTED: protein argonaute 10 [Sesamum indicum]                                                 |
| c33459.graph_c0 | 0.57983108    | 0.90286263    | 0.49673726    | 8.07202629     | 11.066431      | 9.08367469     | 2.975E-10 | 2.814989  | up        | -                                                                                                 |
| c33463.graph_c0 | 0.54027516    | 0.59232246    | 0.95876067    | 4.47963042     | 2.86244063     | 3.37434769     | 0.0009383 | 1.34129   | up        | PREDICTED: 187-kDa microtubule-associated protein AIR9-like [Nicotiana sylvestris]                |
| c33470.graph_c0 | 13.7988598    | 14.1859928    | 15.7715316    | 14.7426471     | 14.1621273     | 13.7849315     | 8.345E-10 | -1.053397 | down      | PREDICTED: protein AIR2 [Sesamum indicum]                                                         |
| c33471.graph_c0 | 0.62858041    | 0.96628653    | 1.06738487    | 3.08158219     | 4.42578295     | 5.37353157     | 0.0004405 | 1.245368  | up        | hypothetical protein MIMGU_mgv1a002735mg [Erythranthe guttata]                                    |
| c33473.graph_c0 | 26.1000759    | 28.8792958    | 20.9171892    | 9.30777767     | 10.9012883     | 10.6285726     | 5.848E-24 | -2.316892 | down      | -                                                                                                 |
| c33474.graph_c0 | 0             | 0             | 0             | 2.58956466     | 3.70349517     | 1.61292534     | 1.71E-07  | Inf       | up        | 60s ribosomal protein l6 [Lichtheimia corymbifera JMRC:FSU:9682]                                  |
| c33475.graph_c0 | 6.1476594     | 6.90888471    | 5.96133892    | 0.17373082     | 0.25766544     | 0.06183386     | 1.869E-56 | -6.28624  | down      | PREDICTED: uncharacterized protein LOC102591997 [Solanum tuberosum]                               |
| c33480.graph_c0 | 0.13709011    | 0.20584107    | 0.15414544    | 4.68875192     | 5.619418       | 6.19482242     | 9.358E-29 | 4.032087  | up        | PREDICTED: uncharacterized protein LOC105159750 isoform X2 [Sesamum indicum]                      |
| c33489.graph_c0 | 7.22543633    | 6.93543844    | 5.34203854    | 4.46809066     | 2.60820015     | 1.78499927     | 6.957E-08 | -2.138208 | down      | hypothetical protein 2_207_02, partial [Pinus radiata]                                            |
| c33494.graph_c0 | 0             | 0             | 0             | 2.7858723      | 4.50460648     | 4.56630709     | 3.419E-13 | Inf       | up        | putative receptor protein kinase [Arabidopsis thaliana]                                           |
| c33494.graph_c1 | 0             | 0.04276892    | 0             | 2.12555342     | 3.00235481     | 3.16968649     | 3.911E-20 | 6.587631  | up        | PREDICTED: probable LRR receptor-like serine/threonine-protein kinase At4g36180 [Sesamum indicum] |
| c33496.graph_c0 | 4.2681701     | 5.40194072    | 4.16085815    | 40.7222659     | 51.7587874     | 58.4335437     | 6.593E-22 | 2.426258  | up        | PREDICTED: myosin heavy chain, muscle [Sesamum indicum]                                           |
| c33503.graph_c0 | 80.1748543    | 86.0690748    | 84.2955235    | 16.0000022     | 16.8944882     | 17.0840469     | 1.16E-106 | -3.344467 | down      | hypothetical protein MIMGU_mgv1a015119mg [Erythranthe guttata]                                    |
| c33510.graph_c0 | 8.33610726    | 9.37372655    | 6.84261252    | 1.86073619     | 2.61635234     | 3.28124062     | 2.417E-26 | -2.684658 | down      | PREDICTED: non-structural maintenance of chromosomes element 4 homolog A-like [Sesamum indicum]   |
| c33512.graph_c0 | 0.53952087    | 0.74258403    | 0.38998444    | 9.25740377     | 11.0905759     | 10.6419971     | 5.892E-21 | 3.195908  | up        | PREDICTED: probable Histone-lysine N-methyltransferase ATXR5 [Sesamum indicum]                    |
| c33514.graph_c0 | 0.19391359    | 0.12940518    | 0             | 2.62013908     | 2.83880418     | 3.86797799     | 1.378E-08 | 3.846471  | up        | PREDICTED: alpha-mannosidase-like [Sesamum indicum]                                               |

| #ID             | 0 h-1<br>FPKM | 0 h-2<br>FPKM | 0 h-3<br>FPKM | 48 h-1<br>FPKM | 48 h-2<br>FPKM | 48 h-3<br>FPKM | FDR       | log2FC    | regulated | nr_annotation                                                                            |
|-----------------|---------------|---------------|---------------|----------------|----------------|----------------|-----------|-----------|-----------|------------------------------------------------------------------------------------------|
| c33518.graph_c0 | 1.44939576    | 1.16585928    | 1.79601197    | 5.79415236     | 6.744444       | 8.14712403     | 1.415E-05 | 1.204375  | up        | unnamed protein product [Coffea canephora]                                               |
| c33518.graph_c1 | 1.24683606    | 0.91770925    | 1.03673945    | 5.13521585     | 5.97699429     | 7.66557544     | 2.687E-05 | 1.531135  | up        | PREDICTED: protein S MICHEL isoform AL [Sesamum indicum]                                 |
| c33520.graph_c0 | 16.1483398    | 13.5875591    | 14.4356563    | 6.42509763     | 8.0857067      | 9.05513506     | 1.617E-21 | -1.9283   | down      | -                                                                                        |
| c33521.graph_c0 | 0.16079139    | 0.1609524     | 0.2066233     | 4.59207691     | 10.9849164     | 8.30381138     | 1.456E-06 | 4.464887  | up        | -                                                                                        |
| c33525.graph_c0 | 19.6987782    | 18.7226195    | 21.9896874    | 2.47469991     | 2.13615476     | 3.42529148     | 6.878E-40 | -3.930366 | down      | PREDICTED: mitogen-activated protein kinase 9-like [Sesamum indicum]                     |
| c33528.graph_c0 | 32.9971994    | 34.6324543    | 32.3821673    | 20.8332636     | 22.4708669     | 21.632472      | 3.033E-27 | -1.641256 | down      | -                                                                                        |
| c33540.graph_c0 | 0.92892036    | 1.77516919    | 1.62777196    | 9.29690469     | 11.0027943     | 13.0488216     | 5.749E-10 | 1.919724  | up        | PREDICTED: uncharacterized protein LOC105174130 [Sesamum indicum]                        |
| c33557.graph_c0 | 0.0239816     | 0.02400562    | 0.03081731    | 45.6670931     | 69.6541622     | 89.2303385     | 7.425E-33 | 10.31256  | up        | PREDICTED: prolyl endopeptidase-like [Sesamum indicum]                                   |
| c33558.graph_c0 | 71.811315     | 73.8799793    | 77.1104292    | 20.847372      | 18.9894962     | 12.4648668     | 1.52E-99  | -3.103951 | down      | PREDICTED: uncharacterized protein LOC102628603 [Citrus sinensis]                        |
| c33563.graph_c0 | 0.07264042    | 0.14542631    | 0             | 1.30496124     | 2.23318555     | 1.96501743     | 3.123E-08 | 3.646185  | up        | PREDICTED: DNA-damage-repair/toleration protein DRT100 [Sesamum indicum]                 |
| c33565.graph_c0 | 3.91661588    | 3.25977298    | 3.95854441    | 22.3792089     | 23.9228051     | 20.8508112     | 5.526E-13 | 1.573858  | up        | PREDICTED: protein FLX-like 3 [Nicotiana glauca]                                         |
| c33566.graph_c0 | 18.9745102    | 18.0292589    | 18.6830755    | 15.7263093     | 12.92143       | 12.7811681     | 8.579E-22 | -1.440124 | down      | PREDICTED: exocyst complex component EXO70A1 [Sesamum indicum]                           |
| c33567.graph_c0 | 11.5390552    | 11.8696875    | 11.5921669    | 5.66765844     | 7.21748018     | 7.47311835     | 9.683E-22 | -1.803863 | down      | PREDICTED: WPP domain-interacting protein 1 [Sesamum indicum]                            |
| c33571.graph_c0 | 0.04007596    | 0             | 0.0514992     | 0.81225302     | 1.95564451     | 2.62813765     | 7.654E-05 | 4.838909  | up        | PREDICTED: transcription factor bHLH130-like [Sesamum indicum]                           |
| c33572.graph_c0 | 2.34996888    | 2.17411581    | 1.83018367    | 17.3523591     | 15.498475      | 16.5199509     | 1.161E-15 | 1.944512  | up        | hypothetical protein MIMGU_mgv1a022739mg, partial [Erythranthe guttata]                  |
| c33583.graph_c0 | 56.9118346    | 53.0603592    | 51.4674546    | 29.703573      | 24.4810084     | 22.016968      | 1.346E-43 | -2.094953 | down      | PREDICTED: nifU-like protein 2, chloroplastic [Sesamum indicum]                          |
| c33589.graph_c0 | 4.73223879    | 4.73697741    | 4.67207555    | 57.3399918     | 63.617261      | 58.968384      | 2.082E-64 | 2.650715  | up        | PREDICTED: protein TRANSPARENT TESTA 12 [Sesamum indicum]                                |
| c33596.graph_c0 | 206.761828    | 196.890444    | 210.455799    | 55.7169966     | 62.7815638     | 56.8441345     | 6.369E-77 | -2.827671 | down      | PREDICTED: uncharacterized protein LOC105160439 [Sesamum indicum]                        |
| c33599.graph_c0 | 157.350601    | 150.934988    | 142.178082    | 13.754234      | 9.06905176     | 6.39851774     | 5.66E-212 | -4.951353 | down      | hypothetical protein MIMGU_mgv1a014857mg [Erythranthe guttata]                           |
| c33599.graph_c1 | 0.04893134    | 0             | 0.18863615    | 40.6159504     | 42.1203206     | 45.124647      | 1.93E-116 | 8.031851  | up        | PREDICTED: probable plastid-lipid-associated protein 6, chloroplastic [Nicotiana glauca] |
| c33602.graph_c0 | 1.13821794    | 1.82987751    | 1.37400935    | 11.05797       | 10.7383635     | 11.1964622     | 2.775E-11 | 1.908586  | up        | PREDICTED: protein ABIL2-like [Sesamum indicum]                                          |
| c33604.graph_c0 | 7.98694398    | 6.14104217    | 7.58609422    | 4.15892255     | 5.98747        | 6.64207435     | 0.000485  | -1.396225 | down      | -                                                                                        |

| #ID             | 0 h-1<br>FPKM | 0 h-2<br>FPKM | 0 h-3<br>FPKM | 48 h-1<br>FPKM | 48 h-2<br>FPKM | 48 h-3<br>FPKM | FDR       | log2FC    | regulated | nr_annotation                                                                 |
|-----------------|---------------|---------------|---------------|----------------|----------------|----------------|-----------|-----------|-----------|-------------------------------------------------------------------------------|
| c33606.graph_c0 | 2.4955156     | 1.9775948     | 2.93959998    | 12.5009851     | 11.619581      | 12.1461337     | 2.485E-05 | 1.271459  | up        | PREDICTED: uncharacterized protein LOC105160133 isoform X1 [Sesamum indicum]  |
| c33607.graph_c0 | 0.18237379    | 0.45639101    | 0.64448322    | 24.7821575     | 18.6890681     | 17.1549419     | 1.136E-19 | 4.541786  | up        | PREDICTED: neurofilament medium polypeptide [Sesamum indicum]                 |
| c33613.graph_c0 | 0.28145908    | 0.22539273    | 0.21701163    | 2.07438767     | 3.68091668     | 3.0916776      | 5.791E-06 | 2.586953  | up        | PREDICTED: uncharacterized protein LOC105174187 [Sesamum indicum]             |
| c33615.graph_c0 | 0.2635421     | 0.35174134    | 0.11288735    | 3.23722901     | 4.88696854     | 4.53673538     | 5.304E-07 | 3.103811  | up        | PREDICTED: putative axial regulator YABBY 2 [Sesamum indicum]                 |
| c33617.graph_c0 | 17.430542     | 14.2707375    | 15.6930821    | 167.718479     | 180.93271      | 201.537667     | 5.85E-67  | 2.51788   | up        | PREDICTED: 20 kDa chaperonin, chloroplastic-like [Sesamum indicum]            |
| c33621.graph_c0 | 0             | 0             | 0             | 3.62593036     | 2.54539572     | 4.97554665     | 4.452E-12 | Inf       | up        | PREDICTED: E3 ubiquitin ligase BIG BROTHER [Sesamum indicum]                  |
| c33624.graph_c0 | 0.97174121    | 0.94133638    | 0.80562963    | 5.02484711     | 5.445589       | 5.26765024     | 4.552E-05 | 1.516435  | up        | PREDICTED: uncharacterized protein LOC105177218 isoform X2 [Sesamum indicum]  |
| c33625.graph_c0 | 0             | 0             | 0             | 3.30929094     | 3.8814131      | 6.30982966     | 4.075E-11 | Inf       | up        | PREDICTED: growth-regulating factor 1-like [Sesamum indicum]                  |
| c33625.graph_c1 | 0             | 0             | 0             | 8.64839215     | 11.1600017     | 13.5486176     | 7.317E-33 | Inf       | up        | PREDICTED: growth-regulating factor 1-like [Sesamum indicum]                  |
| c33632.graph_c0 | 0.09966854    | 0             | 0.04269267    | 4.19316615     | 3.11274821     | 1.96084591     | 1.342E-07 | 5.021653  | up        | PREDICTED: probable receptor-like protein kinase At5g39020 [Nicotiana glauca] |
| c33637.graph_c0 | 0.6341679     | 0.95220439    | 1.08657448    | 44.2072538     | 45.3880595     | 33.270427      | 1.905E-30 | 4.50267   | up        | hypothetical protein MIMGU_mgv1a025918mg [Erythranthe guttata]                |
| c33642.graph_c0 | 2.72129482    | 1.65092108    | 1.58953254    | 58.2695544     | 59.8784463     | 67.8686971     | 5.682E-61 | 3.948776  | up        | PREDICTED: 50S ribosomal protein L18, chloroplastic [Nicotiana glauca]        |
| c33647.graph_c0 | 0.21202422    | 0.09095851    | 0.15569115    | 2.90205368     | 4.02033521     | 5.88450471     | 3.033E-08 | 3.778352  | up        | PREDICTED: U-box domain-containing protein 45-like [Sesamum indicum]          |
| c33648.graph_c0 | 0             | 0             | 0             | 10.9150102     | 5.13916878     | 2.87766234     | 0.0006069 | Inf       | up        | PREDICTED: protein IQ-DOMAIN 1 [Sesamum indicum]                              |
| c33648.graph_c1 | 0             | 0.06394386    | 0.08208819    | 5.29652914     | 2.18206737     | 1.4662106      | 0.0046591 | 4.927968  | up        | PREDICTED: protein IQ-DOMAIN 1 [Sesamum indicum]                              |
| c33649.graph_c0 | 22.3165817    | 25.4955161    | 19.2015844    | 16.7604543     | 23.4374832     | 25.2930441     | 3.804E-08 | -1.055104 | down      | hypothetical protein MIMGU_mgv1a010621mg [Erythranthe guttata]                |
| c33657.graph_c0 | 0.82369816    | 0.41226149    | 0.92617416    | 13.5169172     | 17.9873454     | 20.2564575     | 2.017E-24 | 3.554089  | up        | PREDICTED: uncharacterized protein LOC105180227 [Sesamum indicum]             |
| c33657.graph_c1 | 0.74937445    | 0.21432138    | 0.13756798    | 2.36699184     | 3.23890692     | 2.9836914      | 0.0008318 | 1.953406  | up        | hypothetical protein MIMGU_mgv1a008629mg [Erythranthe guttata]                |
| c33659.graph_c0 | 11.8054162    | 9.39318881    | 14.7814419    | 6.13513402     | 6.49943057     | 7.19596161     | 7.572E-05 | -1.882266 | down      | -                                                                             |
| c33661.graph_c0 | 14.9879852    | 15.3551764    | 13.0209495    | 11.0636146     | 13.5290036     | 12.8822388     | 2.114E-15 | -1.229837 | down      | PREDICTED: xylosyltransferase 1-like [Sesamum indicum]                        |
| c33662.graph_c0 | 205.606645    | 213.199739    | 223.014468    | 43.5790153     | 38.4919143     | 38.4292429     | 5.43E-116 | -3.428833 | down      | hypothetical protein MIMGU_mgv1a015081mg [Erythranthe guttata]                |

| #ID             | 0 h-1<br>FPKM | 0 h-2<br>FPKM | 0 h-3<br>FPKM | 48 h-1<br>FPKM | 48 h-2<br>FPKM | 48 h-3<br>FPKM | FDR       | log2FC    | regulated | nr_annotation                                                                                               |
|-----------------|---------------|---------------|---------------|----------------|----------------|----------------|-----------|-----------|-----------|-------------------------------------------------------------------------------------------------------------|
| c33663.graph_c0 | 0.29355603    | 0.58769997    | 1.50892449    | 6.76107409     | 6.01653207     | 11.5506491     | 0.0007934 | 2.311345  | up        | hypothetical protein MIMGU_mgv1a005080mg [Erythranthe guttata]                                              |
| c33667.graph_c0 | 8.30689252    | 7.30347396    | 8.52351335    | 5.4122826      | 4.9630043      | 5.46310368     | 6.587E-14 | -1.624911 | down      | PREDICTED: rop guanine nucleotide exchange factor 9-like [Sesamum indicum]                                  |
| c33669.graph_c0 | 0.8957583     | 0.93401591    | 0.76738992    | 35.106701      | 35.6613866     | 43.0168956     | 1.608E-82 | 4.435819  | up        | PREDICTED: protein notum homolog [Sesamum indicum]                                                          |
| c33672.graph_c0 | 12.9979819    | 13.7580403    | 13.8258631    | 50.2187894     | 58.4509885     | 61.9667542     | 3.985E-13 | 1.050862  | up        | PREDICTED: carbamoyl-phosphate synthase small chain, chloroplastic [Sesamum indicum]                        |
| c33678.graph_c0 | 8.20972946    | 8.17834568    | 7.37216854    | 8.01896105     | 8.90056564     | 6.8271114      | 1.646E-09 | -1.017227 | down      | PREDICTED: U-box domain-containing protein 5 [Sesamum indicum]                                              |
| c33687.graph_c0 | 97.6515586    | 102.595896    | 97.1648796    | 25.7492253     | 20.865201      | 18.2725058     | 2.48E-105 | -3.208329 | down      | PREDICTED: probable WRKY transcription factor 4 isoform X1 [Sesamum indicum]                                |
| c33688.graph_c0 | 30.5721737    | 27.6491669    | 36.2671194    | 8.75911351     | 10.0524869     | 10.9516419     | 4.953E-23 | -2.689592 | down      | PREDICTED: peptidyl-prolyl cis-trans isomerase FKBP62 [Sesamum indicum]                                     |
| c33689.graph_c0 | 0             | 0             | 0             | 4.39213778     | 3.72234992     | 4.61155538     | 1.176E-12 | Inf       | up        | PREDICTED: mitoferrin-like [Sesamum indicum]                                                                |
| c33690.graph_c0 | 14.1312766    | 14.8159777    | 14.0600965    | 10.3150056     | 12.8265784     | 10.8517533     | 1.222E-15 | -1.359457 | down      | PREDICTED: uncharacterized protein At4g22758 [Sesamum indicum]                                              |
| c33691.graph_c0 | 1.31387749    | 1.57823177    | 1.01303076    | 1.24501335     | 1.06247999     | 0.52313032     | 0.0009271 | -1.470182 | down      | PREDICTED: probable LRR receptor-like serine/threonine-protein kinase At2g16250 [Nicotiana tomentosiformis] |
| c33693.graph_c0 | 7.48936881    | 7.16681748    | 7.80826083    | 1.30182925     | 1.01136218     | 1.15835984     | 2.894E-30 | -3.708158 | down      | PREDICTED: probable calcium-binding protein CML45 [Sesamum indicum]                                         |
| c33693.graph_c1 | 4.8921337     | 5.67024808    | 6.61745842    | 5.4557848      | 5.40280272     | 2.63832854     | 0.0018514 | -1.363276 | down      | PREDICTED: acyl-CoA-binding domain-containing protein 3-like [Sesamum indicum]                              |
| c33699.graph_c0 | 44.1213133    | 44.5058104    | 43.4455332    | 23.6646006     | 27.7610889     | 25.608565      | 6.932E-35 | -1.797419 | down      | PREDICTED: trihelix transcription factor ASIL1-like [Sesamum indicum]                                       |
| c33700.graph_c0 | 133.914216    | 125.508259    | 127.21374     | 70.7380399     | 72.2025304     | 74.2818842     | 9.105E-37 | -1.849518 | down      | PREDICTED: probable protein phosphatase 2C 55 [Sesamum indicum]                                             |
| c33701.graph_c0 | 93.8671965    | 91.4860221    | 88.1758263    | 76.488407      | 60.2389404     | 49.5434669     | 3.806E-29 | -1.564724 | down      | PREDICTED: protein slowmo homolog 1-like [Sesamum indicum]                                                  |
| c33707.graph_c0 | 8.68004208    | 6.1489501     | 4.63328214    | 3.81377306     | 3.90990011     | 3.61240603     | 3.532E-05 | -1.79174  | down      | PREDICTED: mitochondrial protein S12 [Pseudozyma trasinensis CHC0011]                                       |
| c33709.graph_c0 | 23.1156598    | 21.4283404    | 24.8859374    | 19.4590674     | 19.8270013     | 19.0265627     | 3.823E-14 | -1.27033  | down      | PREDICTED: E3 ubiquitin-protein ligase RLIM [Sesamum indicum]                                               |
| c33713.graph_c0 | 38.0141503    | 36.917967     | 35.9327034    | 3.56945977     | 4.42353601     | 3.92516022     | 3.56E-139 | -4.237683 | down      | PREDICTED: uncharacterized protein LOC105174809 [Sesamum indicum]                                           |
| c33715.graph_c1 | 0             | 0             | 0             | 2.47575633     | 1.74850909     | 2.36609185     | 4.124E-11 | Inf       | up        | unnamed protein product [Coffea canephora]                                                                  |
| c33717.graph_c0 | 0.03828547    | 0             | 0.14759505    | 3.42129436     | 5.00696736     | 5.61773443     | 1.349E-17 | 5.193097  | up        | PREDICTED: uncharacterized protein LOC105167945 [Sesamum indicum]                                           |
| c33724.graph_c0 | 3.97449361    | 3.72452835    | 3.74903546    | 53.9496214     | 97.1808725     | 115.486997     | 7.872E-09 | 3.513495  | up        | PREDICTED: alpha-xylosidase 1-like [Sesamum indicum]                                                        |
| c33729.graph_c0 | 29.0432488    | 26.2009899    | 31.6389929    | 116.385423     | 125.045953     | 122.370154     | 7.643E-11 | 1.046013  | up        | hypothetical protein F383_12160 [Gossypium arboreum]                                                        |

| #ID             | 0 h-1<br>FPKM | 0 h-2<br>FPKM | 0 h-3<br>FPKM | 48 h-1<br>FPKM | 48 h-2<br>FPKM | 48 h-3<br>FPKM | FDR       | log2FC    | regulated | nr_annotation                                                                             |
|-----------------|---------------|---------------|---------------|----------------|----------------|----------------|-----------|-----------|-----------|-------------------------------------------------------------------------------------------|
| c33735.graph_c0 | 10.6203626    | 13.2123256    | 9.98497532    | 119.410646     | 168.822672     | 198.817081     | 6.611E-14 | 2.82496   | up        | unnamed protein product [Coffea canephora]                                                |
| c33740.graph_c0 | 4.5505993     | 3.94467121    | 2.89370735    | 0.34575743     | 0.36628808     | 0.49993594     | 1.532E-21 | -4.249013 | down      | -                                                                                         |
| c33743.graph_c0 | 30.3353515    | 29.7161935    | 23.0348936    | 8.07022909     | 10.7659478     | 8.17818038     | 1.74E-34  | -2.639086 | down      | PREDICTED: uncharacterized protein LOC105160397 [Sesamum indicum]                         |
| c33751.graph_c0 | 2.46029839    | 1.96015752    | 2.25827203    | 10.6853404     | 11.8833634     | 12.6564226     | 5.584E-10 | 1.379173  | up        | PREDICTED: two-component response regulator-like APRR1 isoform X2 [Sesamum indicum]       |
| c33753.graph_c0 | 3.70779552    | 4.2293932     | 3.98902106    | 17.4765087     | 20.0500824     | 25.2342081     | 2.433E-09 | 1.373734  | up        | hypothetical protein MIMGU_mgv1a003089mg [Erythranthe guttata]                            |
| c33759.graph_c0 | 18.7282955    | 18.166645     | 19.6705347    | 13.6747808     | 12.3929808     | 10.5517101     | 2.454E-17 | -1.642182 | down      | PREDICTED: uncharacterized protein LOC105159346 [Sesamum indicum]                         |
| c33766.graph_c0 | 4.81697791    | 4.65201964    | 4.8386677     | 5.09399592     | 3.9397549      | 3.61496259     | 1.268E-05 | -1.189498 | down      | PREDICTED: NAC domain-containing protein 89-like [Sesamum indicum]                        |
| c33768.graph_c0 | 43.7196028    | 42.9529483    | 36.5526032    | 33.8628088     | 24.4424706     | 24.2905684     | 4.136E-25 | -1.586067 | down      | PREDICTED: pollen-specific leucine-rich repeat extensin-like protein 1 [Sesamum indicum]  |
| c33769.graph_c0 | 31.0238986    | 31.1485034    | 32.7821508    | 254.906773     | 250.890844     | 222.065273     | 1.396E-39 | 1.921595  | up        | hypothetical protein MIMGU_mgv1a013324mg [Erythranthe guttata]                            |
| c33771.graph_c0 | 4.80815698    | 4.33167446    | 3.91315898    | 27.6110974     | 22.2116929     | 21.5464326     | 3.791E-07 | 1.439946  | up        | PREDICTED: uncharacterized protein LOC105166582 [Sesamum indicum]                         |
| c33774.graph_c1 | 4021.99952    | 4070.62006    | 4025.80509    | 72.5388442     | 58.8471729     | 48.9852001     | 8.15E-191 | -7.081786 | down      | hypothetical protein MIMGU_mgv1a012797mg [Erythranthe guttata]                            |
| c33780.graph_c0 | 14.7557296    | 14.0431698    | 15.5141156    | 2.29140287     | 2.01834043     | 1.83269797     | 3.721E-89 | -3.865721 | down      | PREDICTED: homocysteine S-methyltransferase 2 [Sesamum indicum]                           |
| c33788.graph_c0 | 0             | 0.10286187    | 0             | 1.84603122     | 1.10318506     | 1.43199934     | 1.219E-07 | 4.414931  | up        | PREDICTED: WUSCHEL-related homeobox 1 [Sesamum indicum]                                   |
| c33796.graph_c0 | 3.38657107    | 3.36194599    | 2.84130871    | 18.8227191     | 20.0223353     | 21.061614      | 2.841E-17 | 1.625992  | up        | hypothetical protein MIMGU_mgv1a003584mg [Erythranthe guttata]                            |
| c33797.graph_c0 | 0.11081461    | 0.22185115    | 0.14240116    | 2.65433085     | 2.16303206     | 2.99767891     | 1.051E-06 | 3.024351  | up        | PREDICTED: probable BOI-related E3 ubiquitin-protein ligase 3 [Sesamum indicum]           |
| c33799.graph_c0 | 0.49523629    | 0.2478661     | 0.15909956    | 3.72599242     | 3.82640338     | 3.75515906     | 3.001E-07 | 2.638963  | up        | PREDICTED: beta-galactosidase 8-like isoform X1 [Sesamum indicum]                         |
| c33801.graph_c0 | 0             | 0             | 0             | 9.51447176     | 8.83105948     | 9.00960268     | 1.603E-30 | Inf       | up        | PREDICTED: sulfate transporter 5.1-like [Sesamum indicum]                                 |
| c33802.graph_c0 | 0.04103234    | 0.08214685    | 0.05272818    | 0.98284328     | 2.80323961     | 4.23809744     | 0.0009031 | 4.477119  | up        | PREDICTED: dof zinc finger protein DOF1.1-like [Sesamum indicum]                          |
| c33805.graph_c0 | 0.20154904    | 0.10087543    | 0.12949925    | 3.89928252     | 4.81928652     | 4.21303488     | 5.104E-11 | 3.886273  | up        | PREDICTED: 7-methylguanosine phosphate-specific 5'&apos;-nucleotidase A [Sesamum indicum] |
| c33806.graph_c0 | 14.5045286    | 15.1770158    | 14.3592684    | 15.0176937     | 13.9848982     | 12.9675213     | 2.292E-09 | -1.084611 | down      | PREDICTED: protein Mpv17-like [Sesamum indicum]                                           |



| #ID             | 0 h-1<br>FPKM | 0 h-2<br>FPKM | 0 h-3<br>FPKM | 48 h-1<br>FPKM | 48 h-2<br>FPKM | 48 h-3<br>FPKM | FDR       | log2FC    | regulated | nr_annotation                                                                                               |
|-----------------|---------------|---------------|---------------|----------------|----------------|----------------|-----------|-----------|-----------|-------------------------------------------------------------------------------------------------------------|
| c33810.graph_c0 | 1.9885819     | 1.97086452    | 1.84697695    | 14.0212354     | 14.4694831     | 15.6555377     | 5.035E-23 | 1.908703  | up        | PREDICTED: conserved oligomeric Golgi complex subunit 3 [Sesamum indicum]                                   |
| c33812.graph_c0 | 32.5236056    | 27.8026402    | 35.6917535    | 16.6856033     | 15.5207181     | 13.669873      | 9.31E-21  | -2.082211 | down      | -                                                                                                           |
| c33813.graph_c0 | 42.3387302    | 44.4961151    | 45.4261438    | 27.9998939     | 25.3796727     | 28.1782889     | 9.207E-25 | -1.71441  | down      | PREDICTED: uncharacterized protein C9orf85 homolog [Sesamum indicum]                                        |
| c33814.graph_c1 | 2.0155078     | 2.01752603    | 3.40790437    | 2.0522717      | 1.55295215     | 1.39131354     | 0.0030592 | -1.591535 | down      | PREDICTED: probable VAMP-like protein At1g33475 [Sesamum indicum]                                           |
| c33815.graph_c0 | 57.4628091    | 58.5116176    | 62.0451516    | 4.31496756     | 5.72051141     | 4.19046599     | 1.33E-190 | -4.66688  | down      | PREDICTED: neat snock 70 kDa protein $\delta$ [Sesamum indicum]                                             |
| c33816.graph_c0 | 0.0842782     | 0             | 0             | 1.55285142     | 3.12560979     | 2.34892035     | 7.273E-08 | 5.375084  | up        | PREDICTED: dehydrololichyl diphosphate synthase 2 [Vitis vinifera]                                          |
| c33818.graph_c0 | 0.29695994    | 0.77286899    | 0.45792634    | 16.0864375     | 9.62214483     | 7.35155076     | 7.249E-05 | 3.431289  | up        | unnamed protein product [Coffea canephora]                                                                  |
| c33821.graph_c0 | 0.10709349    | 0.10720072    | 0.04587312    | 13.286416      | 7.8041526      | 6.87675906     | 2.89E-09  | 5.75062   | up        | PREDICTED: ras GTPase-activating protein-binding protein 1-like [Sesamum indicum]                           |
| c33827.graph_c0 | 0.55581659    | 0.8559587     | 0.4395362     | 4.80543449     | 6.63469877     | 5.88805121     | 3.613E-07 | 2.20789   | up        | hypothetical protein MIMGU_mgv1a007488mg [Erythranthe guttata]                                              |
| c33832.graph_c0 | 1.4508947     | 1.633891      | 1.16528571    | 10.1363295     | 13.9242749     | 12.8350795     | 8.642E-09 | 2.097889  | up        | PREDICTED: G-type recan $\delta$ -receptor-like serine/threonine-protein kinase At1g11330 [Sesamum indicum] |
| c33838.graph_c0 | 3.03543869    | 2.18390622    | 2.37696401    | 0              | 0              | 0              | 9.79E-29  | -Inf      | down      | -                                                                                                           |
| c33842.graph_c0 | 2.36571081    | 2.63119967    | 3.04003205    | 0.12108039     | 0.12827        | 0.21547321     | 2.619E-14 | -5.136948 | down      | PREDICTED: ethylene-responsive transcription factor ERF109-like [Solanum tuberosum]                         |
| c33845.graph_c0 | 48.5565885    | 51.0549577    | 48.8170053    | 8.35230231     | 9.01110278     | 6.74791778     | 1.93E-106 | -3.638666 | down      | PREDICTED: transcription factor 1GA1 [Sesamum indicum]                                                      |
| c33850.graph_c1 | 13.5062008    | 13.0465348    | 14.694749     | 14.7032339     | 12.9619367     | 10.6102091     | 8.913E-13 | -1.122305 | down      | PREDICTED: uncharacterized protein LOC105173341 [Sesamum indicum]                                           |
| c33851.graph_c0 | 34.3975658    | 34.5226203    | 33.0353538    | 15.6778549     | 15.7253402     | 12.6144169     | 1.853E-31 | -2.227167 | down      | PREDICTED: selenoprotein O-like [Malus domestica]                                                           |
| c33853.graph_c0 | 14.3768218    | 13.5242772    | 13.5778542    | 0.63830679     | 1.01431298     | 1.1359231      | 1.24E-24  | -4.920709 | down      | -                                                                                                           |
| c33856.graph_c0 | 1.53541534    | 1.19957294    | 1.01059657    | 0.31050543     | 0.32894286     | 0.12279372     | 1.217E-10 | -3.305848 | down      | -                                                                                                           |
| c33857.graph_c0 | 0.30573958    | 0.68860289    | 0.98221865    | 2.95750601     | 6.78842449     | 5.51376793     | 0.0013854 | 1.909582  | up        | PREDICTED: vesicle transport protein SFT2B isoform X1 [Nicotiana sylvestris]                                |
| c33860.graph_c0 | 55.1157944    | 52.7660955    | 47.3989237    | 50.5158737     | 52.9637372     | 48.887526      | 2.06E-09  | -1.0436   | down      | hypothetical protein MIMGU_mgv1a005676mg [Erythranthe guttata]                                              |
| c33869.graph_c0 | 0.66265423    | 0.47379841    | 0.30412033    | 3.44485309     | 5.54339869     | 6.40201998     | 1.189E-06 | 2.397275  | up        | hypothetical protein MIMGU_mgv1a014159mg [Erythranthe guttata]                                              |
| c33870.graph_c0 | 0.03969524    | 0             | 0             | 7.49681746     | 10.4988957     | 8.94839683     | 3.492E-33 | 8.405526  | up        | PREDICTED: non-specific phospholipase C3-like [Sesamum indicum]                                             |
| c33873.graph_c0 | 45.96523      | 36.703923     | 45.5289133    | 18.7898168     | 27.4798803     | 24.9556647     | 1.157E-19 | -1.872346 | down      | PREDICTED: RING finger and CHY zinc finger domain-containing protein 1-like [Sesamum indicum]               |

| #ID             | 0 h-1<br>FPKM | 0 h-2<br>FPKM | 0 h-3<br>FPKM | 48 h-1<br>FPKM | 48 h-2<br>FPKM | 48 h-3<br>FPKM | FDR       | log2FC    | regulated | nr_annotation                                                                                       |
|-----------------|---------------|---------------|---------------|----------------|----------------|----------------|-----------|-----------|-----------|-----------------------------------------------------------------------------------------------------|
| c33874.graph_c0 | 0.15929443    | 0.21260525    | 0.27293286    | 2.1034513      | 2.28017372     | 2.82922071     | 1.342E-05 | 2.458147  | up        | -                                                                                                   |
| c33875.graph_c0 | 0.4266468     | 0.65317203    | 0.32250472    | 4.18487821     | 4.26191468     | 4.25857265     | 5.703E-08 | 2.16611   | up        | PREDICTED: probable serine/threonine-protein kinase At1g54610 isoform X2 [Sesamum indicum]          |
| c33877.graph_c0 | 6.20736275    | 7.65440828    | 7.91890467    | 151.916581     | 175.950978     | 205.010911     | 4.709E-54 | 3.589569  | up        | hypothetical protein MIMGU_mgv1a007222mg [Erythranthe guttata]                                      |
| c33886.graph_c0 | 0.67704309    | 0.67772104    | 0.71184041    | 20.6399996     | 23.6076145     | 22.6539589     | 6.929E-32 | 3.996492  | up        | hypothetical protein MIMGU_mgv1a026334mg [Erythranthe guttata]                                      |
| c33887.graph_c0 | 5.58803901    | 4.1078254     | 5.49783933    | 466.463044     | 389.431958     | 472.243416     | 6.778E-91 | 5.433358  | up        | metallothionein class I type 3 [Avicennia marina]                                                   |
| c33905.graph_c0 | 57.8702117    | 61.2893211    | 54.9218081    | 38.1904109     | 36.2504661     | 32.0106653     | 7.375E-34 | -1.724207 | down      | hypothetical protein MIMGU_mgv1a015035mg [Erythranthe guttata]                                      |
| c33911.graph_c0 | 6.59394844    | 6.1964359     | 5.53370437    | 5.51688786     | 4.26843587     | 3.36452261     | 1.033E-05 | -1.487354 | down      | PREDICTED: uncharacterized protein LOC105171510 [Sesamum indicum]                                   |
| c33912.graph_c0 | 3.19434873    | 2.41126524    | 1.68232155    | 20.2621936     | 18.6544002     | 13.2213972     | 2.277E-06 | 1.831118  | up        | -                                                                                                   |
| c33919.graph_c0 | 20.5139896    | 18.4276646    | 15.8091544    | 302.408515     | 300.604528     | 319.286454     | 1.496E-92 | 3.058888  | up        | PREDICTED: malate dehydrogenase, mitochondrial [Sesamum indicum]                                    |
| c33924.graph_c0 | 0.59225031    | 0.71141203    | 0.50737673    | 8.58441526     | 10.866735      | 12.6550813     | 1.573E-18 | 3.12741   | up        | PREDICTED: F-box protein At2g32300-like [Sesamum indicum]                                           |
| c33931.graph_c0 | 180.579699    | 179.955865    | 188.371675    | 9.09832405     | 12.2723667     | 12.5199922     | 4.44E-216 | -5.041127 | down      | hypothetical protein MIMGU_mgv1a010609mg [Erythranthe guttata]                                      |
| c33945.graph_c0 | 2.74434491    | 4.26079724    | 2.91483613    | 12.305965      | 15.5510893     | 15.7474732     | 9.709E-08 | 1.115429  | up        | PREDICTED: ethylene receptor 2-like [Sesamum indicum]                                               |
| c33952.graph_c0 | 2.49342949    | 2.53752506    | 2.45651931    | 19.525434      | 23.442807      | 19.6560297     | 2.469E-18 | 2.044752  | up        | PREDICTED: Golgi to ER traffic protein 4 homolog [Sesamum indicum]                                  |
| c33967.graph_c0 | 3.20188913    | 3.70112199    | 2.98795014    | 90.9869474     | 103.681174     | 107.800368     | 5.86E-124 | 3.915652  | up        | PREDICTED: auxin-responsive protein IAA9-like [Sesamum indicum]                                     |
| c33968.graph_c0 | 11.7109947    | 10.6646136    | 11.6174699    | 72.1141451     | 79.1382022     | 82.9333357     | 3.99E-35  | 1.764533  | up        | PREDICTED: glucose-6-phosphate isomerase, cytosolic [Sesamum indicum]                               |
| c33974.graph_c0 | 5.30592887    | 4.33070498    | 4.93017611    | 4.02333808     | 5.6165951      | 4.91823811     | 0.0004724 | -1.023467 | down      | hypothetical protein MIMGU_mgv1a020463mg [Erythranthe guttata]                                      |
| c33982.graph_c1 | 21.7316012    | 21.0058239    | 26.0066574    | 16.511809      | 19.2414854     | 15.1206282     | 7.043E-13 | -1.455122 | down      | hypothetical protein MIMGU_mgv1a015522mg [Erythranthe guttata]                                      |
| c33984.graph_c0 | 0             | 0             | 0             | 1.90333269     | 1.62608886     | 2.07599391     | 1.79E-11  | Inf       | up        | -                                                                                                   |
| c33985.graph_c0 | 0.03504283    | 0.07015583    | 0.09006284    | 5.3268167      | 7.76356011     | 4.88339884     | 1.19E-18  | 5.495632  | up        | PREDICTED: PI-PLC X domain-containing protein At5g67130-like isoform X2 [Nicotiana tomentosiformis] |
| c33987.graph_c0 | 2.23637455    | 2.09572369    | 1.89550479    | 6.77266892     | 8.80018559     | 11.4284794     | 0.0004266 | 1.093748  | up        | PREDICTED: cellulose synthase-like protein E6 [Sesamum indicum]                                     |
| c33996.graph_c0 | 611.235202    | 582.437609    | 654.740645    | 10.3029174     | 11.4080111     | 11.032045      | 0         | -6.839024 | down      | PREDICTED: glutaredoxin [Sesamum indicum]                                                           |
| c33996.graph_c1 | 1.53998641    | 1.23322278    | 0.19789435    | 41.2852155     | 43.7366797     | 63.624088      | 5.225E-19 | 4.636921  | up        | hypothetical protein CICLE_v10010813mg, partial [Citrus clementina]                                 |

| #ID             | 0 h-1<br>FPKM | 0 h-2<br>FPKM | 0 h-3<br>FPKM | 48 h-1<br>FPKM | 48 h-2<br>FPKM | 48 h-3<br>FPKM | FDR       | log2FC    | regulated | nr_annotation                                                                                          |
|-----------------|---------------|---------------|---------------|----------------|----------------|----------------|-----------|-----------|-----------|--------------------------------------------------------------------------------------------------------|
| c34003.graph_c1 | 5.44525343    | 5.97607528    | 5.47986513    | 52.7641476     | 48.1497213     | 46.3038711     | 1.047E-26 | 2.107754  | up        | PREDICTED: 3-oxoacyl-[acyl-carrier-protein] reductase, chloroplastic-like isoform X2 [Sesamum indicum] |
| c34006.graph_c0 | 50.929112     | 57.2257588    | 61.0360927    | 11.1370277     | 11.7983304     | 9.78179368     | 1.311E-64 | -3.389214 | down      | PREDICTED: uncharacterized protein LOC105156884 [Sesamum indicum]                                      |
| c34007.graph_c0 | 249.198178    | 261.628215    | 242.405968    | 47.6306395     | 51.7176228     | 74.7421349     | 3.399E-96 | -3.134637 | down      | -                                                                                                      |
| c34008.graph_c0 | 0.19626193    | 0.19645846    | 0.08406812    | 3.97780447     | 4.2140015      | 6.05992718     | 3.502E-10 | 3.887988  | up        | PREDICTED: acyl-protein thioesterase 1 homolog 1 [Sesamum indicum]                                     |
| c34010.graph_c0 | 0.51714305    | 0.29118425    | 0.5399463     | 7.59303787     | 10.7567486     | 11.1809139     | 2.994E-23 | 3.426526  | up        | PREDICTED: reinitiation factor 11-like [Sesamum indicum]                                               |
| c34011.graph_c0 | 10.1814765    | 11.3136906    | 10.3228406    | 1.97923234     | 2.09675667     | 1.83767899     | 8.814E-21 | -3.445    | down      | PREDICTED: uncharacterized protein LOC105163738 [Sesamum indicum]                                      |
| c34014.graph_c0 | 3.4001042     | 3.64151651    | 2.9026609     | 17.6115231     | 19.6551125     | 19.3933759     | 4.104E-16 | 1.492909  | up        | PREDICTED: NEDD8-activating enzyme E1 regulatory subunit [Sesamum indicum]                             |
| c34018.graph_c0 | 0             | 0             | 0             | 6.86340778     | 6.25457919     | 3.8086785      | 2.277E-12 | Inf       | up        | unnamed protein product [Coffea canephora]                                                             |
| c34025.graph_c0 | 3.65065378    | 2.79447186    | 2.20763983    | 23.9777829     | 23.7668001     | 25.8417503     | 1.209E-20 | 2.074625  | up        | hypothetical protein MIMGU_mgv1a009463mg [Erythranthe guttata]                                         |
| c34026.graph_c0 | 34.4049956    | 31.0973565    | 30.4824298    | 23.1129791     | 31.6541277     | 27.577447      | 8.863E-18 | -1.242501 | down      | PREDICTED: probable receptor-like protein kinase At5g24010 [Sesamum indicum]                           |
| c34030.graph_c0 | 18.9270343    | 17.9279935    | 17.2068992    | 11.0346433     | 11.965571      | 9.40173365     | 2.835E-19 | -1.754948 | down      | PREDICTED: dnaJ homolog subfamily B member 4 [Sesamum indicum]                                         |
| c34031.graph_c0 | 0.30020852    | 0.50084855    | 0.77155966    | 2.02819223     | 3.80892389     | 3.69137709     | 0.0029298 | 1.562716  | up        | PREDICTED: maltose excess protein 1-like, chloroplastic [Sesamum indicum]                              |
| c34032.graph_c0 | 2.40924644    | 2.94104748    | 3.77558178    | 0.37894841     | 0.86024976     | 1.01155805     | 1.84E-10  | -3.055274 | down      | PREDICTED: uncharacterized protein LOC105176742 [Sesamum indicum]                                      |
| c34034.graph_c0 | 25.6378604    | 25.5681293    | 21.9229522    | 13.960832      | 19.5337095     | 17.8911858     | 3.333E-13 | -1.530412 | down      | hypothetical protein MIMGU_mgv1a010704mg [Erythranthe guttata]                                         |
| c34036.graph_c0 | 0.26304655    | 0.23937269    | 0.3687548     | 9.89170029     | 12.8829387     | 14.9175922     | 7.342E-32 | 4.40757   | up        | PREDICTED: uncharacterized protein LOC105158907 [Sesamum indicum]                                      |
| c34037.graph_c0 | 19.9600514    | 18.1636713    | 18.3901762    | 12.9949614     | 17.1414043     | 15.4358282     | 1.64E-16  | -1.331757 | down      | PREDICTED: cyclin-C1-2-like [Sesamum indicum]                                                          |
| c34044.graph_c0 | 0             | 0             | 0             | 2.89854951     | 3.98356117     | 5.99469257     | 1.534E-09 | Inf       | up        | PREDICTED: receptor-like serine/threonine-protein kinase At3g01300 [Sesamum indicum]                   |
| c34044.graph_c1 | 0             | 0.0749921     | 0.09627142    | 5.17638761     | 5.9224554      | 7.43088196     | 1.164E-14 | 5.722546  | up        | PREDICTED: receptor-like serine/threonine-protein kinase At3g01300 [Sesamum indicum]                   |
| c34050.graph_c0 | 1.24536008    | 1.4840561     | 1.21930439    | 25.9236734     | 35.7684446     | 40.3728519     | 2.007E-24 | 3.668785  | up        | PREDICTED: polygalacturonase-1 non-catalytic subunit beta-like [Sesamum indicum]                       |
| c34051.graph_c0 | 155.160122    | 128.920345    | 163.32293     | 3.43689589     | 5.79245935     | 5.00421157     | 7.935E-93 | -6.00127  | down      | PREDICTED: HVA22-like protein e [Sesamum indicum]                                                      |
| c34059.graph_c0 | 1.96676463    | 1.76149888    | 2.60718211    | 12.2447096     | 12.4666533     | 12.6093222     | 9.667E-15 | 1.53692   | up        | PREDICTED: vacuolar protein sorting-associated protein 35B-like isoform X1 [Sesamum indicum]           |

| #ID             | 0 h-1<br>FPKM | 0 h-2<br>FPKM | 0 h-3<br>FPKM | 48 h-1<br>FPKM | 48 h-2<br>FPKM | 48 h-3<br>FPKM | FDR       | log2FC    | regulated | nr_annotation                                                                   |
|-----------------|---------------|---------------|---------------|----------------|----------------|----------------|-----------|-----------|-----------|---------------------------------------------------------------------------------|
| c34063.graph_c0 | 2.0533487     | 1.6747743     | 1.73465779    | 10.2465933     | 13.1744725     | 14.6812827     | 5.865E-15 | 1.780461  | up        | PREDICTED: homeobox-leucine zipper protein MERISTEM L1-like [Sesamum indicum]   |
| c34069.graph_c0 | 94.6321948    | 97.3658158    | 93.841366     | 24.1363646     | 46.1790347     | 50.4160533     | 1.239E-54 | -2.272105 | down      | PREDICTED: uncharacterized protein LOC105174506 [Sesamum indicum]               |
| c34071.graph_c0 | 0.82150735    | 1.19611631    | 1.03647548    | 7.56826154     | 7.90103496     | 7.5790288      | 5.273E-17 | 1.897034  | up        | PREDICTED: conserved oligomeric Golgi complex subunit 4 [Sesamum indicum]       |
| c34074.graph_c0 | 3.09795119    | 1.31883877    | 2.47095926    | 64.1993782     | 59.149463      | 67.4865601     | 6.03E-102 | 3.775239  | up        | Phosphoribulokinase family protein [Populus trichocarpa]                        |
| c34076.graph_c0 | 0.80230215    | 0.49421879    | 0.71376233    | 4.77593678     | 7.1676617      | 7.13325685     | 1.783E-06 | 2.221324  | up        | PREDICTED: uncharacterized protein ycf149 [Sesamum indicum]                     |
| c34081.graph_c0 | 1.00355862    | 1.00456353    | 0.62827278    | 5.54726193     | 6.203132       | 6.43357134     | 9.511E-08 | 1.770899  | up        | PREDICTED: probable glycosyltransferase At3g07620 [Sesamum indicum]             |
| c34084.graph_c0 | 0.61081395    | 0.44738458    | 0.61262058    | 6.56051098     | 7.09546475     | 6.48475776     | 7.025E-23 | 2.57206   | up        | PREDICTED: conserved oligomeric Golgi complex subunit 1 [Sesamum indicum]       |
| c34085.graph_c1 | 13.5662347    | 16.4503502    | 12.0472979    | 6.50307658     | 6.45864478     | 9.22207251     | 2.533E-10 | -1.941292 | down      | -                                                                               |
| c34103.graph_c0 | 5.10096457    | 3.07716947    | 3.16894519    | 0              | 0              | 0              | 4.038E-26 | -Inf      | down      | carboxylesterase [Cryptococcus neoformans var. grubii H99]                      |
| c34106.graph_c2 | 0             | 0.08329672    | 0             | 3.14312583     | 6.41588036     | 9.20875982     | 8.988E-07 | 6.796382  | up        | hypothetical protein MIMGU_mgv1a008571mg [Erythranthe guttata]                  |
| c34109.graph_c0 | 1.90663785    | 1.8351414     | 1.88469625    | 0.20267529     | 0.21470989     | 0.06011308     | 6.946E-18 | -4.57004  | down      | PREDICTED: ATP-dependent 6-phosphofructokinase 6 [Sesamum indicum]              |
| c34111.graph_c0 | 0             | 0.2155088     | 0.41499046    | 6.04943571     | 7.24912145     | 8.29473185     | 1.131E-10 | 4.058663  | up        | PREDICTED: uncharacterized protein At5g01610 [Sesamum indicum]                  |
| c34112.graph_c0 | 5.0873499     | 6.41787477    | 7.6120947     | 69.9809646     | 66.5186668     | 75.6364049     | 7.757E-42 | 2.451057  | up        | hypothetical protein M569_08891, partial [Genlisea aurea]                       |
| c34113.graph_c0 | 1.85048995    | 3.41221068    | 3.50435158    | 0.0897259      | 0.09505371     | 0              | 3.281E-13 | -6.579473 | down      | -                                                                               |
| c34114.graph_c0 | 28.9536618    | 34.1188211    | 27.3162392    | 3.37645592     | 2.8615565      | 1.8026101      | 3.208E-23 | -4.500139 | down      | hypothetical protein PRUPE_ppb013116mg [Prunus persica]                         |
| c34116.graph_c0 | 7.11396317    | 6.33711388    | 6.0385702     | 4.02851139     | 5.00023832     | 4.89531174     | 2.906E-10 | -1.505088 | down      | PREDICTED: GATA transcription factor 20 [Sesamum indicum]                       |
| c34122.graph_c0 | 39.3733105    | 21.1584167    | 23.9666508    | 0              | 0              | 0              | 2.639E-28 | -Inf      | down      | -                                                                               |
| c34134.graph_c0 | 5.07503065    | 4.72802552    | 3.61594512    | 30.737607      | 40.9977012     | 41.8078161     | 2.919E-21 | 2.06131   | up        | PREDICTED: F-box only protein 6-like [Sesamum indicum]                          |
| c34139.graph_c0 | 8.29340796    | 8.1440851     | 7.62203422    | 1.25728568     | 2.45896933     | 2.36653415     | 3.785E-22 | -3.011563 | down      | PREDICTED: nyooscyamine O-moxygenase [Sesamum indicum]                          |
| c34142.graph_c0 | 0.47892337    | 0.38352235    | 0.45131936    | 9.23610992     | 10.9998156     | 12.3011799     | 5.629E-27 | 3.608644  | up        | PREDICTED: probable BOI-related E3 ubiquitin-protein ligase 2 [Sesamum indicum] |
| c34147.graph_c0 | 0             | 0.09700547    | 0             | 3.03546463     | 2.26991062     | 3.73364983     | 3.508E-10 | 5.537397  | up        | PREDICTED: bidirectional sugar transporter SWEET1-like [Sesamum indicum]        |
| c34149.graph_c0 | 0.04802406    | 0.0961443     | 0             | 0.53091479     | 1.31235963     | 1.20069549     | 0.0001255 | 3.383444  | up        | PREDICTED: subtilisin-like protease [Sesamum indicum]                           |
| c34151.graph_c0 | 4.45434735    | 5.80039586    | 4.05239837    | 3.70416639     | 4.38577574     | 3.36057135     | 4.104E-06 | -1.3381   | down      | PREDICTED: uncharacterized protein ycf36 isoform X1 [Brassica rapa]             |
| c34152.graph_c1 | 1.15109959    | 2.17647646    | 1.97227806    | 0.53023401     | 0.81137137     | 0.73390961     | 6.839E-06 | -2.379756 | down      | PREDICTED: UDP-glucuronic acid decarboxylase 1-like [Nicotiana tomentosiformis] |

| #ID             | 0 h-1<br>FPKM | 0 h-2<br>FPKM | 0 h-3<br>FPKM | 48 h-1<br>FPKM | 48 h-2<br>FPKM | 48 h-3<br>FPKM | FDR       | log2FC    | regulated | nr_annotation                                                                                       |
|-----------------|---------------|---------------|---------------|----------------|----------------|----------------|-----------|-----------|-----------|-----------------------------------------------------------------------------------------------------|
| c34153.graph_c0 | 0.32571588    | 0             | 0             | 8.40198003     | 11.9208202     | 13.4835565     | 4.079E-13 | 5.694277  | up        | -                                                                                                   |
| c34155.graph_c0 | 24.3538805    | 25.5281855    | 26.8178567    | 10.3362583     | 17.1911456     | 17.5467629     | 8.155E-29 | -1.794278 | down      | PREDICTED: acyl-CoA-binding domain-containing protein 1 [Sesamum indicum]                           |
| c34158.graph_c0 | 0.37637809    | 0.4362426     | 0.63639571    | 4.47117318     | 6.14799891     | 7.46969218     | 2.191E-11 | 2.612033  | up        | hypothetical protein MIMGU_mgv1a022010mg [Erythranthe guttata]                                      |
| c34160.graph_c0 | 2.80760472    | 2.41826502    | 3.60788322    | 17.2035558     | 26.2543129     | 30.8293335     | 3.135E-07 | 2.04257   | up        | PREDICTED: uncharacterized protein LOC105157271 [Sesamum indicum]                                   |
| c34162.graph_c1 | 0.17981579    | 0.05999861    | 0.38511734    | 12.0930362     | 11.4656469     | 12.7747983     | 1.729E-23 | 4.83126   | up        | PREDICTED: serine/threonine-protein kinase Aurora-2 [Sesamum indicum]                               |
| c34163.graph_c0 | 1.04513087    | 0.7692481     | 0.82952134    | 13.9895385     | 12.9001912     | 11.2383037     | 9.285E-24 | 2.836834  | up        | hypothetical protein MIMGU_mgv1a004090mg [Erythranthe guttata]                                      |
| c34168.graph_c0 | 6.86463158    | 5.31723638    | 4.56818531    | 40.7681578     | 32.461478      | 28.4038983     | 1.932E-06 | 1.592826  | up        | PREDICTED: probable protein phosphatase 2C 34 [Sesamum indicum]                                     |
| c34174.graph_c0 | 24.4183235    | 25.3425088    | 22.7542342    | 13.5250535     | 14.0942252     | 15.3255817     | 3.706E-31 | -1.773747 | down      | PREDICTED: mitochondrial import inner membrane translocase subunit TIM17-2-like [Sesamum indicum]   |
| c34177.graph_c0 | 0.03781357    | 0.07570287    | 0             | 2.29919766     | 3.83810603     | 4.27760744     | 5.501E-13 | 5.507465  | up        | PREDICTED: cytochrome P450 71D95-like [Sesamum indicum]                                             |
| c34185.graph_c0 | 2.9523746     | 3.94044127    | 5.05855767    | 0              | 0              | 0              | 7.736E-19 | -Inf      | down      | hypothetical protein SORBIDRAFT_07g005790 [Sorghum bicolor]                                         |
| c34191.graph_c0 | 23.0175205    | 23.3794009    | 25.0111683    | 7.0164401      | 5.946454       | 8.87919816     | 1.084E-17 | -2.727521 | down      | Mitogen-activated protein kinase 10 [Morus notabilis]                                               |
| c34193.graph_c0 | 2.88926084    | 3.04909258    | 1.89957955    | 15.0627608     | 15.3451128     | 15.2387477     | 9.796E-15 | 1.528629  | up        | hypothetical protein MIMGU_mgv1a013779mg [Erythranthe guttata]                                      |
| c34193.graph_c1 | 3.03555952    | 2.21735615    | 1.37055633    | 20.104966      | 19.2169386     | 20.7811536     | 2.077E-10 | 2.171441  | up        | PREDICTED: abscisic acid receptor P1L2 [Sesamum indicum]                                            |
| c34195.graph_c0 | 0             | 0             | 0             | 4.25787579     | 8.24369878     | 2.61284984     | 9.766E-06 | Inf       | up        | ubiquitin-conjugating enzyme e2-16kda, ubiquitin protein ligase [Thalassiosira pseudonana CCMP1335] |
| c34199.graph_c0 | 0             | 0.05623522    | 0             | 2.17374055     | 3.18007721     | 2.94732384     | 7.495E-12 | 6.193554  | up        | PREDICTED: (+)-neomenthol dehydrogenase-like [Sesamum indicum]                                      |
| c34201.graph_c0 | 45.2777152    | 46.2227672    | 43.2840205    | 12.6069904     | 15.8994972     | 15.6567827     | 1.317E-73 | -2.630801 | down      | PREDICTED: uncharacterized protein LOC105177120 [Sesamum indicum]                                   |
| c34203.graph_c0 | 0.61121199    | 0.35689735    | 0.42544212    | 7.22630046     | 8.12763713     | 9.85364164     | 2.175E-22 | 3.158174  | up        | PREDICTED: zinc finger CCCH domain-containing protein 46-like [Sesamum indicum]                     |
| c34208.graph_c0 | 11.6236815    | 9.11685315    | 8.47070439    | 225.017436     | 235.972312     | 321.159125     | 4.066E-27 | 3.724622  | up        | hypothetical protein JCGZ_15938 [Jatropha curcas]                                                   |
| c34210.graph_c0 | 1.23512998    | 1.64204963    | 0.94239461    | 6.72061734     | 7.72240331     | 7.4512261      | 6.084E-09 | 1.503037  | up        | PREDICTED: protein DENND6A [Sesamum indicum]                                                        |
| c34213.graph_c0 | 34.3865302    | 34.8636764    | 36.586571     | 239.274083     | 233.680292     | 245.080523     | 8.301E-36 | 1.744254  | up        | PREDICTED: probable ATP synthase 24 kDa subunit, mitochondrial [Sesamum indicum]                    |
| c34214.graph_c0 | 17.5602657    | 17.5225734    | 17.1725914    | 16.9407594     | 16.3837563     | 18.1519163     | 2.482E-08 | -1.039018 | down      | PREDICTED: uncharacterized protein LOC105176117, partial [Sesamum indicum]                          |
| c34215.graph_c0 | 1.84418838    | 2.23467402    | 2.30749048    | 1.16246453     | 1.04203018     | 1.35261671     | 4.577E-05 | -1.863428 | down      | PREDICTED: vinorine synthase-like [Sesamum indicum]                                                 |

| #ID             | 0 h-1<br>FPKM | 0 h-2<br>FPKM | 0 h-3<br>FPKM | 48 h-1<br>FPKM | 48 h-2<br>FPKM | 48 h-3<br>FPKM | FDR       | log2FC    | regulated | nr_annotation                                                                                  |
|-----------------|---------------|---------------|---------------|----------------|----------------|----------------|-----------|-----------|-----------|------------------------------------------------------------------------------------------------|
| c34218.graph_c0 | 12.5829769    | 13.7842005    | 11.0504733    | 9.29850913     | 9.47680448     | 9.37273858     | 2.649E-20 | -1.426662 | down      | PREDICTED: uncharacterized protein LOC105168895 [Sesamum indicum]                              |
| c34223.graph_c0 | 0.20827172    | 0.1563602     | 0.40145611    | 2.25451355     | 1.67695028     | 2.21946245     | 0.0002295 | 1.982185  | up        | PREDICTED: putative receptor-like protein kinase At1g80870 [Sesamum indicum]                   |
| c34225.graph_c0 | 2.1745378     | 2.94259657    | 2.38038684    | 14.7281564     | 18.8254188     | 19.4429715     | 1.445E-13 | 1.799512  | up        | PREDICTED: CAP-Gly domain-containing linker protein 1 isoform X1 [Sesamum indicum]             |
| c34228.graph_c0 | 0             | 0             | 0             | 1.30889747     | 2.03659542     | 2.40208877     | 1.864E-12 | Inf       | up        | PREDICTED: transcription factor SPEECHLESS-like [Sesamum indicum]                              |
| c34229.graph_c0 | 0.93262725    | 1.72349748    | 1.50576113    | 6.34483978     | 6.5348776      | 7.39024759     | 5.089E-06 | 1.26279   | up        | PREDICTED: gamma-tubulin complex component 4 isoform X1 [Sesamum indicum]                      |
| c34231.graph_c0 | 16.0034043    | 17.8524983    | 16.3019468    | 13.0563265     | 17.561463      | 16.5341854     | 8.822E-13 | -1.1114   | down      | PREDICTED: uncharacterized protein LOC105161303 [Sesamum indicum]                              |
| c34232.graph_c0 | 9.51475593    | 9.09963393    | 9.81262164    | 46.0613462     | 53.6464786     | 51.0699296     | 3.99E-15  | 1.386629  | up        | PREDICTED: probable signal peptidase complex subunit 2 [Sesamum indicum]                       |
| c34234.graph_c1 | 4.93255127    | 4.62695648    | 4.34527723    | 22.6066206     | 22.0415329     | 24.6926589     | 1.124E-12 | 1.301423  | up        | PREDICTED: xylosyltransferase 1 [Sesamum indicum]                                              |
| c34240.graph_c0 | 0             | 0.09342372    | 0             | 2.66543985     | 2.09501088     | 2.06566753     | 6.615E-10 | 5.190369  | up        | PREDICTED: MADS-box transcription factor 23 [Sesamum indicum]                                  |
| c34242.graph_c0 | 1.74887411    | 1.86236739    | 1.67357525    | 26.498718      | 31.5948193     | 31.3870291     | 1.481E-47 | 3.061688  | up        | hypothetical protein MIMGU_mgv1a006918mg [Erythranthe guttata]                                 |
| c34252.graph_c0 | 11.348652     | 11.5246538    | 11.73018      | 50.4194297     | 47.9956975     | 44.8291992     | 5.827E-11 | 1.033271  | up        | PREDICTED: uncharacterized protein At1g03900 [Sesamum indicum]                                 |
| c34255.graph_c0 | 0.04321715    | 0.02163021    | 0             | 3.58330135     | 5.48321696     | 6.97905331     | 3.859E-17 | 6.9425    | up        | PREDICTED: subtilisin-like protease [Sesamum indicum]                                          |
| c34257.graph_c0 | 2.4359044     | 2.77700242    | 2.05783875    | 9.82838823     | 11.402555      | 14.143994      | 7.322E-08 | 1.262991  | up        | PREDICTED: ABC transporter B family member 25, mitochondrial [Sesamum indicum]                 |
| c34259.graph_c0 | 0.0678981     | 0             | 0             | 1.31359541     | 1.59039435     | 2.05936591     | 4.165E-10 | 5.190237  | up        | PREDICTED: pathogenesis-related protein 5 [Sesamum indicum]                                    |
| c34261.graph_c0 | 39.3081028    | 38.5708692    | 40.9306076    | 33.155715      | 34.5355466     | 50.7712852     | 1.753E-10 | -1.026028 | down      | PREDICTED: kinesin KIF1-like isoform A2 [Sesamum indicum]                                      |
| c34266.graph_c0 | 9.29976489    | 10.4463853    | 9.13866818    | 5.38864004     | 6.77640841     | 6.89896332     | 8.028E-13 | -1.620622 | down      | PREDICTED: aspartic proteinase nepenthesin-2-like [Sesamum indicum]                            |
| c34267.graph_c0 | 52.2993027    | 51.1691912    | 54.7865499    | 1.01408762     | 0.70746774     | 0.94634512     | 0         | -6.903817 | down      | hypothetical protein MIMGU_mgv1a010327mg [Erythranthe guttata]                                 |
| c34268.graph_c0 | 0.06412093    | 0             | 0             | 2.89454654     | 4.13028146     | 4.99341347     | 2.301E-13 | 6.54643   | up        | PREDICTED: auxin transporter-like protein 2 [Sesamum indicum]                                  |
| c34277.graph_c0 | 7.89737937    | 7.64609765    | 5.98924632    | 47.6490918     | 49.0885407     | 59.537442      | 1.305E-22 | 1.84275   | up        | PREDICTED: long chain acyl-CoA synthetase 6, peroxisomal-like isoform X2 [Sesamum indicum]     |
| c34279.graph_c0 | 0.15336048    | 0.15351405    | 0.49268573    | 6.92299833     | 5.91216433     | 5.53146654     | 5.262E-10 | 3.494154  | up        | -                                                                                              |
| c34284.graph_c0 | 1.6180142     | 1.19090764    | 2.20151891    | 12.451063      | 16.6273245     | 12.990378      | 5.211E-12 | 2.043751  | up        | PREDICTED: putative lipoyltransferase-like protein, chloroplastic isoform X1 [Sesamum indicum] |

| #ID             | 0 h-1<br>FPKM | 0 h-2<br>FPKM | 0 h-3<br>FPKM | 48 h-1<br>FPKM | 48 h-2<br>FPKM | 48 h-3<br>FPKM | FDR       | log2FC    | regulated | nr_annotation                                                                                     |
|-----------------|---------------|---------------|---------------|----------------|----------------|----------------|-----------|-----------|-----------|---------------------------------------------------------------------------------------------------|
| c34292.graph_c0 | 0.54698231    | 0.37642689    | 0.57110131    | 4.9761683      | 8.97514571     | 10.2567206     | 1.716E-07 | 2.98758   | up        | PREDICTED: probable fructokinase-6, chloroplastic [Sesamum indicum]                               |
| c34293.graph_c0 | 0.23176889    | 0.23200097    | 0.05956644    | 1.96438971     | 4.25254508     | 4.97772134     | 3.65E-05  | 3.398883  | up        | PREDICTED: GDSL esterase/lipase At5g45960 [Sesamum indicum]                                       |
| c34294.graph_c0 | 0.57971382    | 0.23211773    | 0.07449552    | 15.4346283     | 17.0300563     | 17.8204665     | 2.176E-30 | 4.820718  | up        | PREDICTED: ABC transporter B family member 19 [Sesamum indicum]                                   |
| c34294.graph_c1 | 0.38241826    | 0.44169369    | 0.34021565    | 20.5152035     | 21.2165929     | 21.0756437     | 1.015E-70 | 4.737138  | up        | PREDICTED: ABC transporter B family member 19 [Sesamum indicum]                                   |
| c34294.graph_c2 | 0.33295022    | 0.49992543    | 0.07130904    | 20.4490308     | 21.7174267     | 21.1976697     | 3.396E-41 | 5.124205  | up        | PREDICTED: ABC transporter B family member 19 [Sesamum indicum]                                   |
| c34297.graph_c1 | 0.03189573    | 0.03192767    | 0             | 0.61707292     | 0.68484317     | 1.04584338     | 2.307E-08 | 4.194862  | up        | PREDICTED: zinc finger protein 91-like [Sesamum indicum]                                          |
| c34299.graph_c0 | 1.8366291     | 1.92601432    | 2.0229781     | 0.161145       | 0.25607039     | 0.50185049     | 1.625E-10 | -3.684813 | down      | PREDICTED: receptor-like cytosolic serine/threonine-protein kinase RBK2 [Sesamum indicum]         |
| c34311.graph_c1 | 14.0691597    | 16.7965341    | 18.1900048    | 1.54585834     | 1.13375732     | 1.09334254     | 5.369E-54 | -4.71358  | down      | PREDICTED: vesicle transport v-SNARE 13-like isoform X2 [Sesamum indicum]                         |
| c34317.graph_c0 | 0.29685257    | 0.4952497     | 0.25431153    | 6.83699866     | 6.27724158     | 6.00240669     | 5.183E-11 | 3.179474  | up        | PREDICTED: NAC domain-containing protein 21/22-like [Sesamum indicum]                             |
| c34330.graph_c0 | 31.704338     | 31.6636834    | 31.4157477    | 139.576978     | 136.99385      | 139.6104       | 1.572E-15 | 1.117396  | up        | PREDICTED: NADH dehydrogenase [ubiquinone] iron-sulfur protein 1, mitochondrial [Sesamum indicum] |
| c34335.graph_c0 | 275.155832    | 250.574913    | 259.617161    | 21.8672163     | 17.6415442     | 17.5864217     | 3.8E-202  | -4.794696 | down      | PREDICTED: uncharacterized protein LOC105176201 [Sesamum indicum]                                 |
| c34337.graph_c0 | 0             | 0.06893287    | 0             | 9.13563827     | 11.4927449     | 11.6852017     | 1.562E-24 | 7.862622  | up        | PREDICTED: MLO-like protein 4 [Sesamum indicum]                                                   |
| c34342.graph_c0 | 0.28931237    | 0.28960207    | 0.18588892    | 2.59870087     | 3.45890806     | 3.37952767     | 1.02E-05  | 2.607102  | up        | -                                                                                                 |
| c34344.graph_c0 | 1.63603508    | 1.12051333    | 2.2130209     | 10.1539182     | 12.3535643     | 16.3051627     | 6.482E-07 | 1.937232  | up        | hypothetical protein MIMGU_mgv1a014272mg [Erythranthe guttata]                                    |
| c34351.graph_c0 | 26.5837143    | 36.219621     | 31.3143649    | 16.327101      | 19.3685703     | 19.7486687     | 1.902E-14 | -1.784652 | down      | hypothetical protein MIMGU_mgv11b020149mg [Erythranthe guttata]                                   |
| c34354.graph_c0 | 1.30551677    | 1.27841483    | 1.20352488    | 19.3743664     | 18.6966728     | 15.7269847     | 8.284E-33 | 2.813655  | up        | PREDICTED: protein NRT1/ PTR FAMILY 5.5-like isoform X2 [Sesamum indicum]                         |
| c34359.graph_c0 | 0.88264154    | 0.48826402    | 0.56711466    | 0.06419581     | 0.15868458     | 0.1142421      | 4.764E-09 | -3.550987 | down      | -                                                                                                 |
| c34360.graph_c0 | 0             | 0.09571884    | 0.12287945    | 6.65111382     | 6.99938603     | 9.40628516     | 3.717E-22 | 5.686763  | up        | PREDICTED: uncharacterized oxidoreductase At1g06690, chloroplastic [Sesamum indicum]              |
| c34362.graph_c0 | 1.15759876    | 1.18702031    | 1.66897002    | 0.67628884     | 0.90933534     | 1.18037096     | 0.0005605 | -1.5658   | down      | PREDICTED: uncharacterized protein LOC105166158 [Sesamum indicum]                                 |
| c34370.graph_c1 | 4.15431181    | 4.15847172    | 3.99262612    | 58.9842604     | 60.476468      | 65.247086      | 3.521E-69 | 2.889829  | up        | PREDICTED: uridine 5'-monophosphate synthase [Sesamum indicum]                                    |

| #ID             | 0 h-1<br>FPKM | 0 h-2<br>FPKM | 0 h-3<br>FPKM | 48 h-1<br>FPKM | 48 h-2<br>FPKM | 48 h-3<br>FPKM | FDR       | log2FC    | regulated | nr_annotation                                                                                     |
|-----------------|---------------|---------------|---------------|----------------|----------------|----------------|-----------|-----------|-----------|---------------------------------------------------------------------------------------------------|
| c34376.graph_c0 | 8.16160689    | 7.1708545     | 8.56442687    | 0.36117489     | 0.10435118     | 0.0876467      | 1.158E-73 | -6.423932 | down      | hypothetical protein MIMGU_mgv1a019938mg [Erythranthe guttata]                                    |
| c34383.graph_c0 | 2.34632512    | 2.04065171    | 2.57026681    | 13.9262948     | 18.6198409     | 23.521842      | 3.132E-08 | 1.984684  | up        | PREDICTED: probable inactive patatin-like protein 9 [Sesamum indicum]                             |
| c34387.graph_c0 | 2.1132288     | 2.60892536    | 3.80181575    | 12.7193822     | 12.7184131     | 16.4567576     | 6.294E-05 | 1.271866  | up        | PREDICTED: protein LURP-one-related 5-like [Sesamum indicum]                                      |
| c34389.graph_c0 | 15.4784927    | 14.8601469    | 13.6520994    | 1.750066       | 4.25729366     | 5.19066069     | 1.201E-28 | -3.005224 | down      | PREDICTED: serine/threonine-protein kinase OXI1 [Sesamum indicum]                                 |
| c34389.graph_c1 | 11.4592633    | 12.4145329    | 13.4208064    | 1.53678151     | 3.89312398     | 4.28061583     | 1.534E-23 | -2.97532  | down      | PREDICTED: serine/threonine-protein kinase OXI1 [Sesamum indicum]                                 |
| c34390.graph_c0 | 6.49634188    | 6.29307772    | 5.95434855    | 4.22586455     | 4.6585897      | 4.90537187     | 1.087E-12 | -1.461643 | down      | PREDICTED: ubiquitin carboxyl-terminal hydrolase 20-like [Sesamum indicum]                        |
| c34400.graph_c0 | 2.25400177    | 1.62450634    | 2.20132595    | 0.08306134     | 0              | 0.07390748     | 1.135E-16 | -6.274112 | down      | PREDICTED: serine/threonine-protein kinase CDL1-like [Sesamum indicum]                            |
| c34401.graph_c0 | 0.01743838    | 0.01745584    | 0.02240901    | 33.0786049     | 37.2212433     | 38.5961574     | 2.63E-220 | 9.869284  | up        | PREDICTED: ABC transporter G family member 28 [Sesamum indicum]                                   |
| c34402.graph_c1 | 0.96339031    | 0.91613725    | 1.08324536    | 6.52340424     | 7.68645287     | 8.03546172     | 5.498E-11 | 1.886144  | up        | PREDICTED: uncharacterized protein LOC105169037 [Sesamum indicum]                                 |
| c34406.graph_c0 | 0             | 0             | 0             | 0.72802739     | 0.69413107     | 0.46641197     | 4.282E-12 | Inf       | up        | hypothetical protein VITISV_004365 [Vitis vinifera]                                               |
| c34409.graph_c0 | 10.9000268    | 12.3341078    | 11.3425975    | 12.3885443     | 11.7365841     | 10.4405252     | 8.929E-06 | -1.015843 | down      | hypothetical protein MIMGU_mgv1a015267mg [Erythranthe guttata]                                    |
| c34410.graph_c0 | 7.08433936    | 7.47381446    | 6.47073628    | 1.43968136     | 1.6607383      | 1.48028956     | 3.276E-31 | -3.216864 | down      | PREDICTED: pentatricopeptide repeat-containing protein At5g18390, mitochondrial [Sesamum indicum] |
| c34411.graph_c0 | 82.9953131    | 73.9079305    | 79.0164569    | 47.9220451     | 43.9480681     | 43.3408195     | 1.561E-34 | -1.818579 | down      | PREDICTED: polyadenylate-binding protein 1 isoform X1 [Sesamum indicum]                           |
| c34413.graph_c0 | 46.5133807    | 29.6182932    | 34.2203449    | 0              | 0              | 0              | 1.51E-47  | -Inf      | down      | -                                                                                                 |
| c34414.graph_c0 | 0.12401871    | 0.2482858     | 0.15936896    | 18.5948595     | 14.0101943     | 11.1066431     | 4.512E-16 | 5.352095  | up        | PREDICTED: ABC transporter G family member 8-like [Sesamum indicum]                               |
| c34416.graph_c1 | 2.81888424    | 2.01550495    | 2.24242439    | 12.6137087     | 15.9828311     | 15.1298558     | 1.369E-06 | 1.607232  | up        | PREDICTED: outer envelope pore protein 21B, chloroplastic [Sesamum indicum]                       |
| c34420.graph_c0 | 0.85186696    | 1.05737277    | 0.87574622    | 16.8887972     | 22.2481455     | 24.8876342     | 1.505E-28 | 3.500204  | up        | PREDICTED: unaj protein F3D1F3K nomolog [Sesamum indicum]                                         |
| c34428.graph_c0 | 22.0660752    | 21.6567614    | 21.9314238    | 14.3730316     | 16.9510307     | 14.484821      | 2.809E-20 | -1.538704 | down      | hypothetical protein PGTG_21261 [Puccinia graminis f. sp. tritici CRL 75-36-700-3]                |
| c34430.graph_c0 | 159.04022     | 165.53313     | 147.142251    | 66.9034705     | 51.194945      | 43.3343148     | 1.43E-69  | -2.556628 | down      | hypothetical protein PRUPE_ppa024708mg, partial [Prunus persica]                                  |
| c34441.graph_c0 | 3.13104731    | 3.89245256    | 2.5958192     | 19.0750847     | 23.1649694     | 18.7529798     | 8.034E-11 | 1.647753  | up        | PREDICTED: 1-aminocyclopropane-1-carboxylate oxidase 5-like [Sesamum indicum]                     |



| #ID             | 0 h-1<br>FPKM | 0 h-2<br>FPKM | 0 h-3<br>FPKM | 48 h-1<br>FPKM | 48 h-2<br>FPKM | 48 h-3<br>FPKM | FDR       | log2FC    | regulated | nr_annotation                                                                     |
|-----------------|---------------|---------------|---------------|----------------|----------------|----------------|-----------|-----------|-----------|-----------------------------------------------------------------------------------|
| c34451.graph_c0 | 2.95018253    | 2.44397519    | 3.07209937    | 1.31208993     | 1.092143       | 1.20918579     | 2.746E-07 | -2.244155 | down      | PREDICTED: putative nuclease HARBI1 isoform X2 [Sesamum indicum]                  |
| c34453.graph_c0 | 0.2034014     | 0.05090127    | 0.03267236    | 1.75674974     | 2.28290435     | 1.87577443     | 7.351E-09 | 3.357877  | up        | PREDICTED: uncharacterized protein DDB_G0290685 [Sesamum indicum]                 |
| c34455.graph_c0 | 9.49446596    | 8.52340456    | 8.1338431     | 62.2003294     | 58.9072089     | 53.3688548     | 5.865E-20 | 1.723752  | up        | hypothetical protein MIMGU_mgv1a015463mg [Erythranthe guttata]                    |
| c34456.graph_c1 | 0.33938971    | 0.28310796    | 0.58150562    | 14.9559497     | 21.4749892     | 18.2691266     | 2.198E-32 | 4.475512  | up        | hypothetical protein MIMGU_mgv1a023921mg, partial [Erythranthe guttata]           |
| c34457.graph_c0 | 0             | 0.80891242    | 0.51922232    | 155.968015     | 160.891441     | 151.365601     | 3.19E-101 | 7.438388  | up        | --                                                                                |
| c34459.graph_c0 | 10.0183833    | 7.21790395    | 8.7740131     | 117.39801      | 118.078889     | 123.081864     | 1.676E-66 | 2.76752   | up        | PREDICTED: uncharacterized protein LOC105175711 [Sesamum indicum]                 |
| c34460.graph_c0 | 0             | 0             | 0             | 11.8489373     | 19.2229295     | 20.2203668     | 3.87E-27  | Inf       | up        | PREDICTED: transcription factor DILLP3 [Sesamum indicum]                          |
| c34467.graph_c0 | 0.74174273    | 0.78156365    | 0.40133422    | 13.4510434     | 14.6688598     | 13.632749      | 5.789E-26 | 3.426727  | up        | hypothetical protein MIMGU_mgv1a014915mg [Erythranthe guttata]                    |
| c34469.graph_c0 | 0.08690824    | 0.26098579    | 0.11168053    | 3.60294916     | 3.30796938     | 3.34836616     | 1.416E-07 | 3.467301  | up        | -                                                                                 |
| c34472.graph_c0 | 0             | 0             | 0             | 0.63598812     | 1.09928006     | 2.17424124     | 0.0001624 | Inf       | up        | PREDICTED: protein NRT1/ PTR FAMILY 6.4 [Sesamum indicum]                         |
| c34475.graph_c0 | 9.18529466    | 7.71680607    | 8.74721237    | 6.34656941     | 6.12311531     | 6.79001273     | 1.014E-09 | -1.430986 | down      | PREDICTED: uncharacterized protein LOC105155514 [Sesamum indicum]                 |
| c34477.graph_c0 | 7.66906458    | 7.29290679    | 6.1902043     | 36.3197623     | 34.2194225     | 31.4134058     | 9.57E-16  | 1.255533  | up        | hypothetical protein MIMGU_mgv1a003188mg [Erythranthe guttata]                    |
| c34486.graph_c0 | 0.52757718    | 0.28165625    | 0.40677454    | 9.04031632     | 9.98903804     | 9.19728348     | 3.755E-21 | 3.519018  | up        | hypothetical protein MIMGU_mgv1a001741mg [Erythranthe guttata]                    |
| c34489.graph_c0 | 0             | 0             | 0             | 24.1613008     | 41.6286082     | 15.828625      | 8.496E-10 | Inf       | up        | hypothetical protein PAXINDRAFT_10917 [Paxillus involutus ATCC 200175]            |
| c34493.graph_c0 | 59.8991401    | 62.6598233    | 54.425757     | 30.0447923     | 36.1889258     | 35.9680313     | 2.292E-33 | -1.811876 | down      | hypothetical protein MIMGU_mgv1a000078mg [Erythranthe guttata]                    |
| c34495.graph_c0 | 9.53498196    | 11.2984391    | 11.3626665    | 45.4603568     | 51.5002954     | 50.137059      | 7.746E-14 | 1.171004  | up        | PREDICTED: uncharacterized protein LOC105179402 [Sesamum indicum]                 |
| c34498.graph_c0 | 1.67900073    | 1.4829547     | 1.77683258    | 54.911577      | 66.1244408     | 61.9351999     | 1.204E-94 | 4.189753  | up        | PREDICTED: cytochrome P450 11D9C-like [Sesamum indicum]                           |
| c34501.graph_c0 | 0             | 0             | 0             | 22.2377088     | 16.8407702     | 12.3966619     | 4.186E-16 | Inf       | up        | PREDICTED: probable galactinol--sucrose galactosyltransferase 1 [Sesamum indicum] |
| c34502.graph_c0 | 0.70001969    | 0.91632701    | 0.89955302    | 5.55609425     | 4.36195247     | 4.63479305     | 0.0008068 | 1.517475  | up        | PREDICTED: NAC domain-containing protein 72-like [Sesamum indicum]                |
| c34503.graph_c0 | 0             | 0             | 0             | 3.56500459     | 3.07847847     | 3.43868432     | 1.841E-19 | Inf       | up        | hypothetical protein CISIN_1g004365mg [Citrus sinensis]                           |
| c34508.graph_c0 | 0.35199211    | 0.16442747    | 0.21108444    | 13.1008349     | 17.0163503     | 17.2739697     | 3.928E-69 | 5.006514  | up        | PREDICTED: cellulose synthase-like protein G2 [Sesamum indicum]                   |

| #ID             | 0 h-1<br>FPKM | 0 h-2<br>FPKM | 0 h-3<br>FPKM | 48 h-1<br>FPKM | 48 h-2<br>FPKM | 48 h-3<br>FPKM | FDR       | log2FC    | regulated | nr_annotation                                                                                        |
|-----------------|---------------|---------------|---------------|----------------|----------------|----------------|-----------|-----------|-----------|------------------------------------------------------------------------------------------------------|
| c34509.graph_c0 | 0.42647199    | 0.25613942    | 0.21921336    | 5.73624968     | 6.40983966     | 8.80978273     | 8.805E-10 | 3.521753  | up        | hypothetical protein CAPUB_v10021088mg [Capsella<br>embellia]                                        |
| c34512.graph_c0 | 3.3126713     | 2.90876179    | 2.76325982    | 15.1655473     | 17.6684102     | 17.7580505     | 2.205E-19 | 1.474513  | up        | PREDICTED: uncharacterized protein LOC105177031<br>isoform X1 [Sesamum indicum]                      |
| c34518.graph_c0 | 0.04734052    | 0             | 0             | 3.40182746     | 4.4816782      | 4.15232104     | 6.869E-16 | 6.989344  | up        | PREDICTED: serine/threonine-protein kinase At5g01020<br>[Sesamum indicum]                            |
| c34519.graph_c0 | 24.7758305    | 22.3902104    | 23.5174291    | 103.674316     | 116.149661     | 114.488504     | 2.564E-17 | 1.222471  | up        | PREDICTED: proteasome subunit alpha type-3 [Sesamum<br>indicum]                                      |
| c34521.graph_c0 | 0.1861241     | 0.18631048    | 0.47835369    | 1.37175732     | 2.42201757     | 2.03430235     | 0.0010295 | 1.738546  | up        | PREDICTED: LOW QUALITY PROTEIN: uncharacterized<br>protein LOC103453887 [Malus domestica]            |
| c34523.graph_c0 | 0.03950503    | 0             | 0             | 5.45919147     | 6.16890816     | 5.76429948     | 2.363E-23 | 7.784263  | up        | Serine carboxypeptidase-like 40 [Theobroma cacao]                                                    |
| c34526.graph_c0 | 5.58722477    | 5.59281953    | 5.23273927    | 23.3374068     | 30.2685327     | 31.2452613     | 1.416E-11 | 1.348382  | up        | PREDICTED: uncharacterized protein LOC105164370<br>[Sesamum indicum]                                 |
| c34527.graph_c1 | 18.7416056    | 17.4139342    | 15.9789814    | 21.0936969     | 15.4906523     | 15.853227      | 7.466E-11 | -1.001563 | down      | PREDICTED: uncharacterized protein LOC105168318<br>[Sesamum indicum]                                 |
| c34529.graph_c0 | 0.2314741     | 0.23170589    | 0.08498668    | 13.8916518     | 11.7796711     | 12.7673105     | 3.534E-42 | 5.125779  | up        | PREDICTED: acetolactate synthase small subunit 1,<br>chloroplastic-like isoform X2 [Sesamum indicum] |
| c34532.graph_c0 | 0             | 0             | 0             | 3.29283183     | 3.12116068     | 5.47436525     | 6.257E-10 | Inf       | up        | hypothetical protein MIMGU_mgv1a017766mg, partial<br>[Erythranthe guttata]                           |
| c34533.graph_c0 | 0             | 0             | 0             | 50.3761628     | 55.2300324     | 69.3111843     | 1.548E-69 | Inf       | up        | PREDICTED: GDSL esterase/lipase At2g40250 [Sesamum<br>indicum]                                       |
| c34533.graph_c1 | 0             | 0             | 0             | 17.1039113     | 16.3075681     | 24.2235072     | 4.979E-22 | Inf       | up        | PREDICTED: GDSL esterase/lipase At2g30310-like<br>[Cucumis melo]                                     |
| c34535.graph_c0 | 1.24343366    | 1.75177012    | 1.1836011     | 30.0808268     | 35.7323778     | 36.4678472     | 4.682E-54 | 3.594391  | up        | PREDICTED: poly(U)-specific endoribonuclease-B<br>[Sesamum indicum]                                  |
| c34537.graph_c0 | 4.89573012    | 5.17074605    | 4.8546322     | 17.3662994     | 21.5201706     | 22.4676419     | 4.637E-07 | 1.01839   | up        | PREDICTED: protein disulfide isomerase-like 5-2<br>[Sesamum indicum]                                 |
| c34541.graph_c0 | 18.9688625    | 20.3064581    | 18.6203564    | 14.4733738     | 13.952428      | 14.321875      | 1.329E-24 | -1.454049 | down      | PREDICTED: lysine-specific demethylase REF6 isoform<br>X1 [Sesamum indicum]                          |
| c34545.graph_c0 | 0.40782283    | 0.57152368    | 0.52406848    | 29.6061837     | 29.8516767     | 35.6705739     | 1.881E-79 | 4.963305  | up        | PREDICTED: LOW QUALITY PROTEIN: signal peptide<br>peptidase-like [Sesamum indicum]                   |
| c34552.graph_c0 | 576.771256    | 604.116531    | 584.298523    | 136.923428     | 63.1655267     | 51.4655806     | 8.72E-133 | -3.810213 | down      | PREDICTED: zinc finger CCCH domain-containing protein<br>29 [Sesamum indicum]                        |
| c34555.graph_c0 | 30.1506338    | 27.1497523    | 28.6277625    | 16.6580679     | 12.3277112     | 9.57417974     | 4.33E-41  | -2.16509  | down      | PREDICTED: RNA-directed DNA methylation 4 [Sesamum<br>indicum]                                       |
| c34558.graph_c0 | 0.26038098    | 0.14034554    | 0.18016916    | 4.68688503     | 5.49298178     | 5.87791196     | 9.75E-23  | 3.770075  | up        | PREDICTED: histidine kinase 5-like [Sesamum indicum]                                                 |
| c34574.graph_c0 | 131.093961    | 130.672372    | 136.877674    | 75.4508907     | 81.2016504     | 79.1011761     | 8.09E-35  | -1.776935 | down      | PREDICTED: heat shock 70 kDa protein 14-like [Sesamum<br>indicum]                                    |

| #ID             | 0 h-1<br>FPKM | 0 h-2<br>FPKM | 0 h-3<br>FPKM | 48 h-1<br>FPKM | 48 h-2<br>FPKM | 48 h-3<br>FPKM | FDR       | log2FC    | regulated | nr_annotation                                                                                                   |
|-----------------|---------------|---------------|---------------|----------------|----------------|----------------|-----------|-----------|-----------|-----------------------------------------------------------------------------------------------------------------|
| c34580.graph_c0 | 109.402773    | 104.024982    | 126.257267    | 17.7405854     | 12.8494251     | 9.83230985     | 7.992E-66 | -4.081443 | down      | hypothetical protein MIMGU_mgv1a010728mg [Erythranthe guttata]                                                  |
| c34593.graph_c0 | 0.53802107    | 0.17951994    | 0.23045946    | 85.9474622     | 109.429127     | 133.457306     | 3.666E-55 | 7.421221  | up        | PREDICTED: uncharacterized protein LOC105177617 [Sesamum indicum]                                               |
| c34594.graph_c0 | 5.32388129    | 5.42471795    | 4.708059      | 3.34012284     | 4.73035582     | 5.38092262     | 1.264E-09 | -1.223662 | down      | PREDICTED: uncharacterized protein LOC103331091 [Prunus mume]                                                   |
| c34605.graph_c0 | 9.96441786    | 9.18989268    | 10.6465808    | 52.2943251     | 60.7536884     | 60.5731285     | 1.278E-12 | 1.521234  | up        | 40S ribosomal protein s13, partial [Camellia sinensis]                                                          |
| c34610.graph_c0 | 1.8238076     | 1.4605071     | 1.61452476    | 9.74522102     | 11.2336472     | 11.0965282     | 3.016E-08 | 1.691475  | up        | PREDICTED: F-actin-capping protein subunit alpha [Sesamum indicum]                                              |
| c34613.graph_c0 | 8338.39758    | 8509.41383    | 8986.97563    | 1309.80425     | 1381.27807     | 1122.96387     | 2.092E-29 | -3.777595 | down      | hypothetical protein MIMGU_mgv1a024110mg [Erythranthe guttata]                                                  |
| c34616.graph_c0 | 0             | 0.02849705    | 0.0365832     | 1.02285603     | 0.9724543      | 0.86345775     | 3.567E-09 | 4.428254  | up        | Cysteine-rich RLK (RECEPTOR-like protein kinase) 8 [Theobroma cacao]                                            |
| c34619.graph_c1 | 0.34967357    | 0.70004743    | 0.53921325    | 8.76226507     | 7.7809672      | 4.87288173     | 1.48E-06  | 2.739625  | up        | PREDICTED: uncharacterized protein LOC105177084 [Sesamum indicum]                                               |
| c34623.graph_c0 | 1.28444308    | 1.19389145    | 1.41476589    | 44.3742279     | 44.0990258     | 39.5967323     | 6.745E-75 | 4.02203   | up        | hypothetical protein MIMGU_mgv1a008681mg [Erythranthe guttata]                                                  |
| c34624.graph_c0 | 0.20628346    | 0.10324501    | 0.53016482    | 2.85062666     | 3.1205564      | 2.87466653     | 3.039E-05 | 2.364512  | up        | PREDICTED: zinc finger Ran-binding domain-containing protein 2-like isoform X2 [Sesamum indicum]                |
| c34627.graph_c0 | 65.4916       | 61.7546709    | 67.7846923    | 47.0011577     | 49.2288753     | 47.2608818     | 2.767E-24 | -1.461351 | down      | PREDICTED: quinone oxidoreductase-like protein 2 homolog [Sesamum indicum]                                      |
| c34632.graph_c0 | 8.53497042    | 11.4957269    | 6.43136539    | 3.29339118     | 4.62285691     | 4.79859496     | 1.336E-06 | -2.077333 | down      | PREDICTED: exocyst complex component EXO70A1-like [Sesamum indicum]                                             |
| c34632.graph_c1 | 2.7183966     | 2.21213244    | 2.03563329    | 10.7021034     | 11.6238834     | 13.2419581     | 2.298E-11 | 1.334528  | up        | PREDICTED: chloroplastic group IIA intron splicing facilitator CRS1, chloroplastic [Sesamum indicum]            |
| c34639.graph_c0 | 90.6784481    | 92.1497697    | 91.8246703    | 445.329046     | 480.01636      | 472.349973     | 1.75E-21  | 1.328563  | up        | 40S ribosomal protein S15D [Hevea brasiliensis]                                                                 |
| c34641.graph_c0 | 32.55315      | 34.5534854    | 33.0412858    | 6.95422262     | 7.52063804     | 7.5843833      | 1.418E-96 | -3.201581 | down      | PREDICTED: BTB/POZ domain-containing protein POB1-like [Sesamum indicum]                                        |
| c34644.graph_c0 | 0.45846422    | 0.4589233     | 0.58914467    | 24.3766178     | 26.3354385     | 33.2332029     | 1.328E-42 | 4.776618  | up        | PREDICTED: cytokinin riboside 5'-monophosphate phosphoribohydrolase LOG3-like isoform X1 [Nicotiana sylvestris] |
| c34645.graph_c0 | 18.9693013    | 18.9540213    | 20.2402518    | 11.5769008     | 12.5650826     | 12.7991332     | 3.538E-24 | -1.674727 | down      | PREDICTED: stress response protein NST1-like [Sesamum indicum]                                                  |
| c34647.graph_c0 | 0.05552871    | 0             | 0.14271318    | 74.3306393     | 98.2542426     | 119.57814      | 1.511E-52 | 9.483823  | up        | PREDICTED: probable pectinesterase 15 [Sesamum indicum]                                                         |
| c34648.graph_c0 | 97.3794263    | 110.931612    | 93.1389953    | 31.7061312     | 39.5868017     | 44.3330248     | 7.001E-63 | -2.403814 | down      | PREDICTED: uncharacterized protein LOC105163464 [Sesamum indicum]                                               |
| c34652.graph_c0 | 3.1243141     | 2.16515259    | 2.05890632    | 1.1070469      | 1.01641103     | 0.78803494     | 1.523E-06 | -2.346207 | down      | PREDICTED: protein YLS9-like [Sesamum indicum]                                                                  |

| #ID             | 0 h-1<br>FPKM | 0 h-2<br>FPKM | 0 h-3<br>FPKM | 48 h-1<br>FPKM | 48 h-2<br>FPKM | 48 h-3<br>FPKM | FDR       | log2FC    | regulated | nr_annotation                                                                               |
|-----------------|---------------|---------------|---------------|----------------|----------------|----------------|-----------|-----------|-----------|---------------------------------------------------------------------------------------------|
| c34659.graph_c0 | 7.03077974    | 5.0428474     | 4.97982774    | 21.6757124     | 29.1222194     | 22.0097776     | 3.91E-06  | 1.075519  | up        | hypothetical protein MIMGU_mgv1a010012mg<br>[Erythranthe guttata]                           |
| c34662.graph_c0 | 0             | 0             | 0             | 8.1524566      | 9.06021851     | 9.03329156     | 1.36E-39  | Inf       | up        | PREDICTED: probable GABA transporter 2 [Sesamum indicum]                                    |
| c34664.graph_c0 | 24.9426898    | 24.1067121    | 24.3155712    | 13.4703502     | 13.7105869     | 14.5710171     | 6.974E-12 | -1.831329 | down      | PREDICTED: cyclin-dependent kinase F-4-like isoform X1 [Sesamum indicum]                    |
| c34673.graph_c0 | 1.0042957     | 0.50265068    | 0.43018658    | 7.09337409     | 6.20768804     | 9.46746241     | 5.108E-07 | 2.543283  | up        | hypothetical protein MIMGU_mgv1a009336mg<br>[Erythranthe guttata]                           |
| c34676.graph_c0 | 0.9102361     | 0.79725412    | 0.77979295    | 4.22778469     | 6.55166998     | 6.49775369     | 6.538E-06 | 1.772227  | up        | PREDICTED: uncharacterized protein LOC105168235<br>isoform X2 [Sesamum indicum]             |
| c34682.graph_c0 | 27.0744031    | 25.633923     | 25.7902224    | 13.4168347     | 15.9305777     | 13.834446      | 2.171E-34 | -1.881592 | down      | PREDICTED: E3 ubiquitin-protein ligase At1g63170-like<br>[Sesamum indicum]                  |
| c34684.graph_c0 | 1.13317547    | 1.18586972    | 1.25760597    | 22.8721083     | 28.7042711     | 34.1161479     | 1.551E-26 | 3.558663  | up        | hypothetical protein CISIN_1g0023491mg, partial [Citrus<br>sinensis]                        |
| c34685.graph_c0 | 3.08252285    | 1.92218298    | 2.27279896    | 0.97764333     | 0.93705699     | 0.91132502     | 1.401E-07 | -2.379242 | down      | PREDICTED: uncharacterized protein LOC105169662<br>[Sesamum indicum]                        |
| c34687.graph_c0 | 70.415942     | 62.1374789    | 71.1455417    | 19.7397387     | 19.6019444     | 17.9179444     | 8.612E-81 | -2.848028 | down      | PREDICTED: probable fructokinase-7 [Sesamum indicum]                                        |
| c34693.graph_c0 | 9.34410696    | 11.6851294    | 8.29174476    | 149.105395     | 116.045707     | 115.15892      | 5.346E-17 | 2.686971  | up        | PREDICTED: steroid 14-oxo-14-demethylase-like [Sesamum<br>indicum]                          |
| c34696.graph_c1 | 0.46945007    | 0.36549345    | 0.13405821    | 2.06633168     | 2.23993548     | 2.69377671     | 0.0010604 | 1.842561  | up        | PREDICTED: 2,3-bisphosphoglycerate-independent<br>phosphoglycerate mutase [Sesamum indicum] |
| c34700.graph_c0 | 0.53247906    | 0.79951838    | 0.25659625    | 5.18148126     | 6.07379443     | 6.30185888     | 1.715E-09 | 2.453231  | up        | PREDICTED: tRNA (guanine(37)-N1)-methyltransferase 2<br>[Sesamum indicum]                   |
| c34704.graph_c0 | 0.44075183    | 0.66178977    | 0.64729549    | 3.97348281     | 3.4412803      | 3.81945989     | 6.933E-05 | 1.664769  | up        | PREDICTED: putative cyclin-A3-1 [Sesamum indicum]                                           |
| c34705.graph_c0 | 0             | 0             | 0             | 0.97541719     | 1.03333624     | 0.65094026     | 1.517E-11 | Inf       | up        | PREDICTED: abscisic acid 8'-hydroxylase 4<br>[Sesamum indicum]                              |
| c34722.graph_c0 | 4.77646478    | 3.92307503    | 5.19364691    | 1.83349621     | 1.94236691     | 1.95772068     | 1.074E-14 | -2.29715  | down      | PREDICTED: probable protein phosphatase 2C 50<br>[Sesamum indicum]                          |
| c34723.graph_c0 | 1.16332272    | 1.00386863    | 0.67013465    | 8.20426853     | 8.61312654     | 10.0623121     | 3.757E-10 | 2.229413  | up        | hypothetical protein MIMGU_mgv1a001992mg<br>[Erythranthe guttata]                           |
| c34724.graph_c0 | 4.19810803    | 4.65161557    | 4.81793946    | 37.4594921     | 35.2258055     | 29.6518092     | 3.75E-18  | 1.888513  | up        | PREDICTED: protein TRANSPORT INHIBITOR<br>RESPONSE 1-like [Sesamum indicum]                 |
| c34729.graph_c0 | 9.91080928    | 10.7115166    | 7.56763876    | 6.48396686     | 6.58861027     | 6.77020809     | 1.029E-07 | -1.521441 | down      | PREDICTED: DNA-directed RNA polymerase I subunit<br>RPA12-like [Sesamum indicum]            |
| c34730.graph_c0 | 0.9281043     | 1.15023215    | 1.07906498    | 31.1068136     | 34.1616316     | 32.2072316     | 6.512E-60 | 3.928712  | up        | PREDICTED: methylsterol monooxygenase 2-2 [Sesamum<br>indicum]                              |
| c34731.graph_c0 | 64.4846162    | 61.3109342    | 67.6225067    | 0.2649161      | 0.56129296     | 0.29465094     | 4.23E-255 | -8.458997 | down      | hypothetical protein MIMGU_mgv1a016001mg<br>[Erythranthe guttata]                           |
| c34735.graph_c0 | 93.5654991    | 90.0888493    | 86.5524122    | 2.98027215     | 3.40010135     | 3.73975777     | 9.82E-210 | -5.758676 | down      | PREDICTED: peroxisomal membrane protein 13 [Glycine<br>max1]                                |

| #ID             | 0 h-1<br>FPKM | 0 h-2<br>FPKM | 0 h-3<br>FPKM | 48 h-1<br>FPKM | 48 h-2<br>FPKM | 48 h-3<br>FPKM | FDR       | log2FC    | regulated | nr_annotation                                                                                     |
|-----------------|---------------|---------------|---------------|----------------|----------------|----------------|-----------|-----------|-----------|---------------------------------------------------------------------------------------------------|
| c34743.graph_c0 | 1.67936548    | 2.1395145     | 1.96186466    | 0.35162296     | 0.52150264     | 0.43802079     | 4.411E-09 | -3.164588 | down      | PREDICTED: uncharacterized protein LOC105168020 [Sesamum indicum]                                 |
| c34752.graph_c0 | 14.5666705    | 11.9343408    | 12.8765912    | 8.80405096     | 12.6319613     | 14.0704024     | 3.328E-09 | -1.173317 | down      | -                                                                                                 |
| c34754.graph_c0 | 1.77904446    | 1.97162868    | 2.12284667    | 11.8240108     | 11.7819806     | 10.4167661     | 2.043E-05 | 1.516258  | up        | PREDICTED: uncharacterized protein LOC105178220 [Sesamum indicum]                                 |
| c34755.graph_c0 | 0.26437485    | 0.26463958    | 0.39635417    | 2.76033937     | 4.90241048     | 3.21464514     | 1.034E-06 | 2.525208  | up        | PREDICTED: beta-galactosidase 8-like isoform X1 [Sesamum indicum]                                 |
| c34762.graph_c0 | 1.18013965    | 1.45927935    | 0.89207422    | 12.3431631     | 12.6695742     | 12.5762424     | 1.407E-09 | 2.397698  | up        | TPA: hypothetical protein ZEAMMB73_114394 [Zea mays]                                              |
| c34763.graph_c0 | 0.11420885    | 0.17148482    | 0.25683507    | 5.4186571      | 5.71254408     | 5.50024174     | 1.24E-18  | 3.912551  | up        | PREDICTED: transmembrane 9 superfamily member 5 isoform X1 [Sesamum indicum]                      |
| c34764.graph_c0 | 758.64986     | 773.011633    | 758.835563    | 9.54472895     | 14.1020682     | 16.1540415     | 1.89E-244 | -6.871949 | down      | PREDICTED: proline dehydrogenase 2, mitochondrial [Sesamum indicum]                               |
| c34771.graph_c0 | 2.16343673    | 2.27571849    | 2.00261574    | 1.53705094     | 1.53885101     | 1.54800928     | 9.543E-07 | -1.494804 | down      | PREDICTED: pentatricopeptide repeat-containing protein At5g13270, chloroplastic [Sesamum indicum] |
| c34773.graph_c0 | 24.0805876    | 22.7954997    | 24.2217399    | 19.5621463     | 20.9865228     | 22.8299762     | 6.488E-14 | -1.185485 | down      | Glutamate-rich WD repeat-containing protein 1 [Cytisium sp.]                                      |
| c34777.graph_c0 | 23.4607797    | 23.8180587    | 22.0371392    | 15.9084876     | 15.3886362     | 13.1009526     | 1.673E-29 | -1.657491 | down      | PREDICTED: zinc finger CCCH domain-containing protein 1 [Sesamum indicum]                         |
| c34783.graph_c1 | 10.5904577    | 10.8242427    | 8.8817659     | 8.78095836     | 8.48636408     | 7.76755246     | 3.477E-13 | -1.28933  | down      | hypothetical protein MIMGU_mgv1a012299mg [Erythranthe guttata]                                    |
| c34786.graph_c0 | 0.93215901    | 0.69981932    | 0.74866327    | 8.42663826     | 7.96038347     | 7.97554989     | 3.153E-13 | 2.340321  | up        | PREDICTED: uncharacterized protein LOC103931436 [Pyrus x bretschneideri]                          |
| c34789.graph_c0 | 3.96076528    | 5.83048733    | 4.19155075    | 1.18053142     | 1.36432352     | 0.85944253     | 5.334E-10 | -3.054312 | down      | -                                                                                                 |
| c34792.graph_c0 | 3.93654626    | 4.30283185    | 3.0816867     | 0.6669615      | 0.66240454     | 1.44655469     | 3.877E-14 | -3.049025 | down      | unnamed protein product [Coffea canephora]                                                        |
| c34794.graph_c0 | 0.93477376    | 1.06938263    | 0             | 182.199932     | 207.094376     | 296.326761     | 8.018E-34 | 7.411876  | up        | hypothetical protein MIMGU_mgv1a016621mg [Erythranthe guttata]                                    |
| c34805.graph_c0 | 0.13341277    | 0.22257728    | 0.34288139    | 9.87365346     | 12.4130392     | 11.118601      | 2.795E-26 | 4.549645  | up        | PREDICTED: 1-aminocyclopropane-1-carboxylate oxidase homolog 11-like [Sesamum indicum]            |
| c34806.graph_c0 | 0.14139797    | 0.04717985    | 0.06056733    | 1.21580698     | 2.57600015     | 3.20681688     | 4.259E-05 | 3.787374  | up        | PREDICTED: O-acyltransferase WSD1-like [Sesamum indicum]                                          |
| c34821.graph_c0 | 133.452253    | 123.586002    | 147.946617    | 18.7368223     | 21.9042842     | 18.2142473     | 2.191E-76 | -3.803167 | down      | PREDICTED: protein lin-12 [Sesamum indicum]                                                       |
| c34824.graph_c0 | 5.58922581    | 3.53249747    | 3.69604044    | 0              | 0              | 0              | 1.235E-36 | -Inf      | down      | VIT-domain-containing protein [Auricularia delicata TFB-10046 SS5]                                |
| c34825.graph_c0 | 33.3319134    | 33.7597567    | 32.9158681    | 164.640781     | 164.064744     | 171.370073     | 8.848E-21 | 1.304537  | up        | PREDICTED: 28 kDa ribonucleoprotein, chloroplastic-like [Sesamum indicum]                         |
| c34827.graph_c0 | 1.60551838    | 1.60712607    | 1.26684937    | 6.30567203     | 7.77969901     | 7.52717774     | 2.874E-05 | 1.251831  | up        | quercetin 3-O-glucoside-6'-O-malonyltransferase [Glandularia x hybrida]                           |
| c34832.graph_c0 | 173.156058    | 179.205022    | 177.717436    | 18.2090889     | 20.4594321     | 20.6211572     | 6.8E-163  | -4.180191 | down      | -                                                                                                 |

| #ID             | 0 h-1<br>FPKM | 0 h-2<br>FPKM | 0 h-3<br>FPKM | 48 h-1<br>FPKM | 48 h-2<br>FPKM | 48 h-3<br>FPKM | FDR       | log2FC    | regulated | nr_annotation                                                                     |
|-----------------|---------------|---------------|---------------|----------------|----------------|----------------|-----------|-----------|-----------|-----------------------------------------------------------------------------------|
| c34834.graph_c0 | 0.87499531    | 1.28011986    | 0.77843327    | 29.3917465     | 33.5346712     | 39.4220088     | 8.386E-56 | 4.106275  | up        | PREDICTED: allene oxide synthase, chloroplastic [Sesamum indicum]                 |
| c34836.graph_c0 | 2.67308576    | 2.67576246    | 2.95940274    | 19.7388541     | 25.0048075     | 27.811706      | 1.568E-20 | 2.102791  | up        | hypothetical protein MIMGU_mgv1a008311mg [Erythranthe guttata]                    |
| c34840.graph_c0 | 42.3422532    | 42.3145953    | 40.4713426    | 21.2773339     | 19.9793058     | 19.8503804     | 1.775E-44 | -2.049638 | down      | PREDICTED: tuboy-like r-box protein o [Sesamum indicum]                           |
| c34841.graph_c0 | 43.8769888    | 45.7336544    | 40.4333438    | 29.7172004     | 26.1427567     | 27.648321      | 2.239E-30 | -1.653317 | down      | PREDICTED: uncharacterized protein LOC105169164 isoform X2 [Sesamum indicum]      |
| c34847.graph_c0 | 56.8883055    | 56.8357077    | 57.4562224    | 19.8393719     | 29.1359506     | 27.1411361     | 1.132E-52 | -2.193276 | down      | PREDICTED: DNA-directed RNA polymerase III subunit RPC5 [Sesamum indicum]         |
| c34848.graph_c0 | 6.71469516    | 7.63279775    | 5.65493389    | 71.6109889     | 81.453856      | 69.1300135     | 5.729E-55 | 2.457151  | up        | hypothetical protein MIMGU_mgv1a0036351mg, partial [Erythranthe guttata]          |
| c34849.graph_c0 | 0.02193226    | 0.02195422    | 0             | 9.29449638     | 16.3749778     | 18.3562194     | 1.504E-23 | 8.958983  | up        | PREDICTED: uncharacterized protein LOC105171410 [Sesamum indicum]                 |
| c34854.graph_c0 | 2.32926988    | 1.97289425    | 2.07221817    | 132.989249     | 213.456546     | 276.616318     | 5.709E-16 | 5.584292  | up        | chalcone isomerase [Camellia nitidissima]                                         |
| c34856.graph_c0 | 86.1756905    | 90.9279293    | 88.2098911    | 45.8055947     | 50.3587585     | 46.042336      | 5.388E-40 | -1.918323 | down      | PREDICTED: DEAD-box ATP-dependent RNA helicase 21 [Sesamum indicum]               |
| c34858.graph_c0 | 2.21805564    | 2.15299557    | 2.85028931    | 46.6270726     | 45.7878078     | 47.1084435     | 5.705E-46 | 3.251839  | up        | PREDICTED: rac-like GTP-binding protein 5 isoform X2 [Sesamum indicum]            |
| c34859.graph_c0 | 0.2455622     | 0.36871214    | 0.6311143     | 3.67620364     | 4.37381408     | 6.24018342     | 8.065E-07 | 2.488076  | up        | hypothetical protein MIMGU_mgv1a004092mg [Erythranthe guttata]                    |
| c34859.graph_c1 | 0.26892035    | 0.94216371    | 0.3455733     | 2.60134314     | 5.38038633     | 4.73954085     | 0.0014724 | 2.005142  | up        | PREDICTED: cytochrome P450 78A9-like, partial [Cucumis melo]                      |
| c34868.graph_c0 | 13.103545     | 11.7644326    | 11.891158     | 225.818085     | 230.789007     | 251.261363     | 9.32E-102 | 3.249468  | up        | hypothetical protein VITISV_041718 [Vitis vinifera]                               |
| c34871.graph_c0 | 15.4722335    | 13.294186     | 15.6158162    | 63.990198      | 78.9369446     | 87.9111098     | 8.216E-14 | 1.356055  | up        | PREDICTED: uncharacterized protein LOC105170170 isoform X1 [Sesamum indicum]      |
| c34872.graph_c0 | 3.18235179    | 4.93758456    | 5.24812498    | 1.61248452     | 1.81176102     | 1.99999501     | 1.145E-07 | -2.325195 | down      | PREDICTED: polyol transporter 5-like [Sesamum indicum]                            |
| c34875.graph_c0 | 15.0346524    | 13.2284052    | 15.2592059    | 59.5500584     | 59.8149367     | 63.74174       | 1.451E-08 | 1.05421   | up        | hypothetical protein PRUPE_ppa013245mg [Prunus persica]                           |
| c34877.graph_c0 | 83.1645899    | 91.8660379    | 79.3284569    | 13.8382486     | 11.6206892     | 10.2109384     | 2.428E-82 | -3.846077 | down      | hypothetical protein MIMGU_mgv1a003677mg [Erythranthe guttata]                    |
| c34877.graph_c1 | 109.843143    | 110.3038      | 98.8369625    | 14.8457096     | 14.3976325     | 12.9224574     | 1.98E-149 | -3.934171 | down      | PREDICTED: uncharacterized protein LOC105162623 [Sesamum indicum]                 |
| c34882.graph_c0 | 85.8428415    | 82.1328394    | 91.1382003    | 409.85197      | 380.743784     | 378.376346     | 2.019E-14 | 1.156828  | up        | PREDICTED: probable galactinol--sucrose galactosyltransferase 2 [Sesamum indicum] |
| c34882.graph_c1 | 3.1976442     | 1.82905495    | 2.935071      | 18.0961102     | 15.6040048     | 17.2251921     | 0.0022024 | 1.660994  | up        | -                                                                                 |
| c34898.graph_c0 | 6.39533017    | 6.66847304    | 5.33208047    | 2.24449344     | 3.15797398     | 4.30632615     | 1.825E-12 | -1.945617 | down      | PREDICTED: probable trehalose-phosphate phosphatase F [Sesamum indicum]           |
| c34900.graph_c0 | 0.2563308     | 0.59870412    | 0.47579311    | 26.501127      | 34.0232379     | 38.1724639     | 2.858E-52 | 5.187358  | up        | PREDICTED: sulfate transporter 3.1 [Sesamum indicum]                              |

| #ID             | 0 h-1<br>FPKM | 0 h-2<br>FPKM | 0 h-3<br>FPKM | 48 h-1<br>FPKM | 48 h-2<br>FPKM | 48 h-3<br>FPKM | FDR       | log2FC    | regulated | nr_annotation                                                                                          |
|-----------------|---------------|---------------|---------------|----------------|----------------|----------------|-----------|-----------|-----------|--------------------------------------------------------------------------------------------------------|
| c34901.graph_c0 | 0             | 0             | 0             | 2.38297703     | 2.17627174     | 2.12035864     | 1.612E-11 | Inf       | up        | PREDICTED: stress enhanced protein 2, chloroplastic [Sesamum indicum]                                  |
| c34902.graph_c0 | 1487.49793    | 1517.3602     | 1443.9736     | 73.3301809     | 65.2738727     | 64.8508957     | 5.93E-202 | -5.465308 | down      | PREDICTED: desiccation-related protein PCC3-06 isoform X2 [Sesamum indicum]                            |
| c34906.graph_c0 | 0.08028496    | 0.24109606    | 0.05158468    | 4.14196947     | 3.95695853     | 4.54106192     | 1.236E-12 | 4.072736  | up        | PREDICTED: manganese-dependent ADP-ribose/CDP-alcohol diphosphatase-like [Sesamum indicum]             |
| c34907.graph_c1 | 0.2750603     | 0.32122501    | 0.05891056    | 12.0366655     | 11.5433614     | 9.92098348     | 1.947E-25 | 4.672392  | up        | PREDICTED: ethylene-responsive transcription factor RAP2-12-like [Sesamum indicum]                     |
| c34910.graph_c0 | 1.54666663    | 2.22135251    | 1.98752786    | 7.4961614      | 8.53194733     | 10.4736155     | 0.0022302 | 1.180515  | up        | PREDICTED: uncharacterized protein LOC105173417 [Sesamum indicum]                                      |
| c34912.graph_c0 | 13.7709284    | 13.806392     | 13.2164927    | 68.7195027     | 71.0248866     | 74.2274048     | 1.29E-22  | 1.373065  | up        | PREDICTED: probable cytosolic oligopeptidase A [Sesamum indicum]                                       |
| c34914.graph_c0 | 5.08203703    | 3.8463635     | 6.84918556    | 19.4127726     | 26.2512287     | 27.5357813     | 0.0001834 | 1.186112  | up        | PREDICTED: uncharacterized protein LOC105169952 [Sesamum indicum]                                      |
| c34917.graph_c0 | 0.6557594     | 0.82052005    | 0.80054295    | 6.56989559     | 7.48800832     | 6.84032064     | 2.612E-17 | 2.177794  | up        | PREDICTED: 125 kDa kinesin-related protein-like [Sesamum indicum]                                      |
| c34918.graph_c0 | 22.0498627    | 19.7591648    | 21.4287068    | 11.7532985     | 14.1178899     | 13.0931045     | 6.595E-22 | -1.71907  | down      | PREDICTED: putative quinone-oxidoreductase homolog, chloroplastic [Sesamum indicum]                    |
| c34919.graph_c0 | 1.53153767    | 2.08497692    | 2.67659769    | 0              | 0.05978932     | 0.05021828     | 2.512E-16 | -6.890368 | down      | PREDICTED: 3-oxoacyl-[acyl-carrier-protein] reductase, chloroplastic-like isoform X2 [Sesamum indicum] |
| c34925.graph_c0 | 23.363432     | 23.2810042    | 20.812279     | 15.4855334     | 12.4637071     | 9.06463237     | 4.687E-38 | -1.875209 | down      | PREDICTED: probable serine/threonine-protein kinase At1g54610 [Sesamum indicum]                        |
| c34927.graph_c0 | 0.94727966    | 1.65939938    | 1.21729187    | 6.98156647     | 6.93386543     | 8.05638964     | 0.0026747 | 1.503887  | up        | -                                                                                                      |
| c34929.graph_c0 | 0.59966604    | 0.60026651    | 0.32446088    | 8.43215397     | 8.90204177     | 7.73572789     | 3.472E-17 | 3.028167  | up        | hypothetical protein CISIN_1g018827mg [Citrus sinensis]                                                |
| c34938.graph_c0 | 81.6703747    | 76.036959     | 88.8084703    | 12.8525601     | 12.3074561     | 12.3043542     | 8.614E-97 | -3.735869 | down      | unnamed protein product [Coffea canephora]                                                             |
| c34943.graph_c0 | 2.12533473    | 2.3638477     | 1.5172996     | 1.0877761      | 2.12035505     | 2.09065672     | 0.0047084 | -1.205741 | down      | PREDICTED: uncharacterized protein LOC104095569 [Nicotiana tomentosiformis]                            |
| c34944.graph_c0 | 0.09559642    | 0             | 0             | 1.27701009     | 1.44613647     | 1.9982783      | 3.056E-09 | 4.625199  | up        | PREDICTED: AP2-like ethylene-responsive transcription factor ANT isoform X2 [Sesamum indicum]          |
| c34945.graph_c0 | 33.1832292    | 35.9700245    | 33.9796575    | 19.4519141     | 20.2683325     | 19.2584155     | 7.32E-37  | -1.823999 | down      | chloroplast glyceraldehyde-3-phosphate dehydrogenase, partial [Chlorokybus atmophyticus]               |
| c34946.graph_c0 | 55.2857926    | 61.0010436    | 56.0877097    | 58.7616758     | 52.1500293     | 57.4628646     | 7.61E-14  | -1.049502 | down      | PREDICTED: zinc finger CCCH domain-containing protein 49-like [Sesamum indicum]                        |
| c34949.graph_c0 | 33.3360881    | 36.594438     | 36.7430945    | 8.69812203     | 8.90890777     | 8.80326447     | 1.025E-75 | -3.032508 | down      | PREDICTED: fructose-1,6-bisphosphatase, chloroplastic [Sesamum indicum]                                |
| c34951.graph_c0 | 0             | 0             | 0             | 2.10064361     | 3.36174001     | 3.45989755     | 1.726E-14 | Inf       | up        | PREDICTED: uncharacterized protein LOC105174266 [Sesamum indicum]                                      |

| #ID             | 0 h-1<br>FPKM | 0 h-2<br>FPKM | 0 h-3<br>FPKM | 48 h-1<br>FPKM | 48 h-2<br>FPKM | 48 h-3<br>FPKM | FDR       | log2FC    | regulated | nr_annotation                                                                             |
|-----------------|---------------|---------------|---------------|----------------|----------------|----------------|-----------|-----------|-----------|-------------------------------------------------------------------------------------------|
| c34953.graph_c0 | 0             | 0.84859333    | 0.15562645    | 95.8395472     | 69.6174543     | 54.7006711     | 1.048E-17 | 6.772158  | up        | -                                                                                         |
| c34956.graph_c0 | 19.5573359    | 19.1571416    | 15.1869489    | 5.05754203     | 4.76253557     | 4.06265391     | 1.41E-48  | -2.969462 | down      | PREDICTED: receptor-like serine/threonine-protein kinase At4g25390 [Sesamum indicum]      |
| c34956.graph_c1 | 15.6560784    | 16.5783861    | 20.9500311    | 3.6952514      | 2.77815346     | 3.50014231     | 1.467E-23 | -3.431638 | down      | PREDICTED: receptor-like serine/threonine-protein kinase At4g25390 [Sesamum indicum]      |
| c34957.graph_c0 | 2.76577343    | 2.16173901    | 3.01857477    | 15.7767249     | 21.0028393     | 20.8396493     | 2.92E-16  | 1.833669  | up        | PREDICTED: uncharacterized protein LOC105178545 [Sesamum indicum]                         |
| c34960.graph_c0 | 2.27331914    | 2.45064134    | 2.24715777    | 1.66472374     | 1.99113075     | 1.57682641     | 0.001348  | -1.432623 | down      | PREDICTED: plasma membrane ATPase 4-like [Sesamum indicum]                                |
| c34964.graph_c0 | 21.4608283    | 23.542867     | 16.2091185    | 8.23123965     | 13.3792162     | 11.2015762     | 4.142E-13 | -1.921417 | down      | PREDICTED: uncharacterized protein LOC105159829 [Sesamum indicum]                         |
| c34966.graph_c0 | 0             | 0.36110195    | 0             | 551.680883     | 619.64617      | 490.882332     | 3.16E-127 | 11.16211  | up        | -                                                                                         |
| c34970.graph_c0 | 4.15548272    | 4.51282111    | 4.886567      | 4.11723016     | 3.74953683     | 3.08504138     | 1.554E-05 | -1.323154 | down      | PREDICTED: uncharacterized protein LOC105172443 [Sesamum indicum]                         |
| c34973.graph_c0 | 2.30438953    | 1.99214743    | 2.82663033    | 0.09649791     | 0.10222783     | 0.17172651     | 7.23E-15  | -5.290763 | down      | -                                                                                         |
| c34974.graph_c0 | 3.94865975    | 3.88987384    | 4.10767286    | 12.1258764     | 19.5950885     | 21.6475688     | 0.0005744 | 1.132458  | up        | PREDICTED: protein HOTHEAD isoform X3 [Sesamum indicum]                                   |
| c34977.graph_c0 | 5.2267147     | 4.60520464    | 3.46321353    | 16.050635      | 18.4118206     | 19.4477383     | 2.439E-10 | 1.003057  | up        | PREDICTED: coiled-coil domain-containing protein 150 [Sesamum indicum]                    |
| c34978.graph_c0 | 20.9348545    | 20.5897771    | 21.8506277    | 10.1064909     | 10.4389366     | 12.4398945     | 7.897E-17 | -1.962047 | down      | PREDICTED: uncharacterized protein LOC104117218 isoform X2 [Nicotiana tomentosiformis]    |
| c34985.graph_c0 | 16.7360592    | 19.8950562    | 16.2691648    | 15.1786859     | 15.8599354     | 15.0413114     | 2.408E-17 | -1.216012 | down      | PREDICTED: uncharacterized protein LOC105167921 [Sesamum indicum]                         |
| c34990.graph_c0 | 0             | 0             | 0             | 24.5619131     | 34.5672051     | 30.469439      | 1.483E-25 | Inf       | up        | PREDICTED: nuclear valosin-containing protein-like [Sesamum indicum]                      |
| c34990.graph_c1 | 0.4372602     | 0.21884903    | 0.09364945    | 25.5127326     | 40.5651784     | 42.6342139     | 4.071E-31 | 6.165614  | up        | PREDICTED: nuclear valosin-containing protein-like [Sesamum indicum]                      |
| c34991.graph_c0 | 0             | 0             | 0             | 0.93655735     | 1.19060274     | 0.81250952     | 5.481E-12 | Inf       | up        | --                                                                                        |
| c34993.graph_c0 | 4.21012724    | 3.77837652    | 3.17148493    | 0.40123902     | 0              | 0              | 6.423E-17 | -5.755472 | down      | -                                                                                         |
| c34999.graph_c1 | 0             | 0             | 0             | 69.7075237     | 186.40565      | 274.754008     | 1.236E-12 | Inf       | up        | PREDICTED: probable chalcone--flavonone isomerase 3 isoform X2 [Pyrus x bretschneideri]   |
| c35003.graph_c0 | 0.92955856    | 1.24065249    | 0.72998417    | 4.4721543      | 6.70334885     | 7.28126503     | 0.0001228 | 1.648238  | up        | PREDICTED: uncharacterized protein LOC105158948 [Sesamum indicum]                         |
| c35005.graph_c0 | 11.5890668    | 10.9424774    | 11.3013322    | 90.448254      | 103.078577     | 112.551161     | 1.778E-48 | 2.156918  | up        | PREDICTED: GDSL esterase/lipase At4g01130-like [Sesamum indicum]                          |
| c35010.graph_c0 | 2.94554705    | 2.39217646    | 3.49947328    | 1.84322042     | 2.11539091     | 2.09566601     | 0.0002745 | -1.568374 | down      | PREDICTED: uncharacterized aarF domain-containing protein kinase 1-like [Sesamum indicum] |



| #ID             | 0 h-1<br>FPKM | 0 h-2<br>FPKM | 0 h-3<br>FPKM | 48 h-1<br>FPKM | 48 h-2<br>FPKM | 48 h-3<br>FPKM | FDR       | log2FC    | regulated | nr_annotation                                                                                    |
|-----------------|---------------|---------------|---------------|----------------|----------------|----------------|-----------|-----------|-----------|--------------------------------------------------------------------------------------------------|
| c35017.graph_c0 | 27.1286185    | 25.4474251    | 21.7483644    | 19.3259045     | 19.5365318     | 25.9689858     | 1.301E-15 | -1.214946 | down      | PREDICTED: beta-carotene hydroxylase 2, chloroplastic isoform X1 [Sesamum indicum]               |
| c35018.graph_c0 | 1.29171394    | 1.12343266    | 1.22451902    | 9.09090473     | 12.0487224     | 13.5048652     | 2.085E-16 | 2.227441  | up        | PREDICTED: uncharacterized protein At5g41620 [Sesamum indicum]                                   |
| c35023.graph_c0 | 5.10816099    | 6.3243151     | 4.70721456    | 3.83908167     | 4.65741851     | 5.31682593     | 1.274E-06 | -1.24484  | down      | PREDICTED: uncharacterized protein LOC105166163 [Sesamum indicum]                                |
| c35025.graph_c0 | 62.1968559    | 59.6482696    | 53.3695561    | 53.0485249     | 57.5691743     | 57.0703264     | 1.331E-08 | -1.080775 | down      | -                                                                                                |
| c35026.graph_c0 | 1.62000661    | 1.49189849    | 1.08252177    | 29.1924345     | 32.4436774     | 35.5366954     | 1.427E-36 | 3.517754  | up        | hypothetical protein MIMGU_mgv1a011760mg [Erythranthe guttata]                                   |
| c35027.graph_c0 | 9.7547834     | 10.7485759    | 11.401601     | 0.20899402     | 0.19680339     | 0.10331201     | 1.25E-140 | -6.982746 | down      | PREDICTED: uncharacterized protein LOC104748542 [Camelina sativa]                                |
| c35028.graph_c0 | 0.63124987    | 0.47391148    | 0.69529806    | 9.61632071     | 12.7616608     | 12.8994988     | 1.348E-35 | 3.267423  | up        | PREDICTED: subtilisin-like protease [Sesamum indicum]                                            |
| c35029.graph_c0 | 2.46838058    | 2.05496626    | 1.94714792    | 8.21804074     | 10.8050028     | 10.1772069     | 1.287E-06 | 1.153854  | up        | PREDICTED: beta-galactosidase 16 [Sesamum indicum]                                               |
| c35030.graph_c0 | 6.9167932     | 8.48713982    | 6.88130563    | 0.10277744     | 0              | 0              | 1.072E-31 | -8.719894 | down      | -                                                                                                |
| c35031.graph_c0 | 2.23440318    | 1.84611605    | 1.64074089    | 7.64577525     | 9.24204728     | 9.33254664     | 9.476E-05 | 1.177856  | up        | PREDICTED: F-box/LRR-repeat protein At1g67190-like [Sesamum indicum]                             |
| c35033.graph_c0 | 9.23747792    | 6.88479194    | 7.74164664    | 31.7743742     | 32.4851631     | 32.7172554     | 7.42E-08  | 1.00582   | up        | hypothetical protein MIMGU_mgv1a011835mg [Erythranthe guttata]                                   |
| c35039.graph_c0 | 4.87328522    | 4.1584358     | 2.87452794    | 41.1422919     | 44.5209103     | 43.6154511     | 2.923E-24 | 2.426735  | up        | PREDICTED: acyl carrier protein 1, chloroplastic-like [Sesamum indicum]                          |
| c35040.graph_c0 | 16.60546      | 16.7051983    | 14.7236847    | 8.87285905     | 8.91352595     | 8.43950053     | 5.542E-14 | -1.888848 | down      | PREDICTED: serine/threonine-protein kinase tricorner [Sesamum indicum]                           |
| c35042.graph_c0 | 0.82717687    | 0.50748703    | 0.61719969    | 0              | 0              | 0              | 7.881E-20 | -Inf      | down      | -                                                                                                |
| c35055.graph_c0 | 13.9821822    | 13.3631901    | 13.2274465    | 102.079434     | 114.998156     | 122.882114     | 2.517E-46 | 2.047042  | up        | hypothetical protein MIMGU_mgv1a005945mg [Erythranthe guttata]                                   |
| c35065.graph_c0 | 0.57527114    | 0.69101663    | 0.59139696    | 10.4140539     | 14.3168905     | 15.5854088     | 1.137E-24 | 3.416433  | up        | PREDICTED: cytokinin uenyurogenase / [Sesamum indicum]                                           |
| c35069.graph_c0 | 0.85332483    | 0.64063448    | 0.65108024    | 2.6532174      | 3.09704345     | 4.24072664     | 0.0026844 | 1.198887  | up        | PREDICTED: probable leucine-rich repeat receptor-like protein kinase At1g68400 [Sesamum indicum] |
| c35070.graph_c0 | 6.84740432    | 7.77862694    | 5.79895441    | 3.93263993     | 2.92481096     | 4.57043508     | 7.016E-18 | -1.851194 | down      | PREDICTED: LOW QUALITY PROTEIN: uncharacterized protein LOC105172331 [Sesamum indicum]           |
| c35074.graph_c0 | 0.64938514    | 0.61753363    | 1.33517699    | 12.6830261     | 12.8974156     | 11.0723506     | 1.901E-22 | 2.790822  | up        | PREDICTED: protease Do-like 1, chloroplastic isoform X2 [Cucumis melo]                           |
| c35077.graph_c0 | 72.9451706    | 30.0316848    | 42.7110074    | 0              | 0              | 0              | 7.132E-15 | -Inf      | down      | hypothetical protein ASPNIDRAFT_138440 [Aspergillus niger ATCC 1015]                             |
| c35089.graph_c0 | 10.1193128    | 10.5030728    | 12.2576026    | 1.68111935     | 2.26665359     | 3.8076179      | 1.361E-36 | -3.112397 | down      | PREDICTED: uncharacterized protein LOC105179874 [Sesamum indicum]                                |

| #ID             | 0 h-1<br>FPKM | 0 h-2<br>FPKM | 0 h-3<br>FPKM | 48 h-1<br>FPKM | 48 h-2<br>FPKM | 48 h-3<br>FPKM | FDR       | log2FC    | regulated | nr_annotation                                                                                                                    |
|-----------------|---------------|---------------|---------------|----------------|----------------|----------------|-----------|-----------|-----------|----------------------------------------------------------------------------------------------------------------------------------|
| c35092.graph_c0 | 2.72584703    | 1.50269433    | 1.3199037     | 0              | 0              | 0              | 3.335E-13 | -Inf      | down      | Chain G, Crystal Structure Of The Fab Complexed With Antigen Asf1p, Northeast Structural Genomics Consortium (nesg) Target Pdr16 |
| c35093.graph_c0 | 18.5941435    | 19.473137     | 15.7944782    | 7.89200495     | 10.4298064     | 11.6724498     | 3.947E-31 | -1.865994 | down      | PREDICTED: U-box domain-containing protein 17 isoform X1 [Sesamum indicum]                                                       |
| c35093.graph_c1 | 6.2623213     | 6.52620544    | 7.60638117    | 3.63542338     | 4.18618506     | 5.76634315     | 2.047E-05 | -1.61038  | down      | PREDICTED: U-box domain-containing protein 17 isoform X1 [Sesamum indicum]                                                       |
| c35096.graph_c0 | 3.29030414    | 2.84447176    | 3.55550751    | 0              | 0.07298259     | 0.18389875     | 5.833E-21 | -6.283051 | down      | --                                                                                                                               |
| c35103.graph_c0 | 1.17678102    | 1.09381943    | 1.26017517    | 8.64720691     | 9.98102545     | 8.49810777     | 1.297E-11 | 1.921585  | up        | hypothetical protein MIMGU_mgv1a002945mg [Erythranthe guttata]                                                                   |
| c35104.graph_c1 | 0.51505245    | 0             | 0             | 4.2704992      | 3.51872583     | 6.75531467     | 1.713E-05 | 3.821334  | up        | PREDICTED: uncharacterized protein LOC102597032 [Solanum tuberosum]                                                              |
| c35106.graph_c0 | 6.50055684    | 6.26783579    | 6.69506285    | 30.5601724     | 35.4536683     | 34.3625504     | 4.617E-13 | 1.346112  | up        | hypothetical protein MIMGU_mgv1a011325mg [Erythranthe guttata]                                                                   |
| c35108.graph_c0 | 7.24279257    | 7.67296443    | 7.91118392    | 1.97395766     | 2.12062187     | 3.36440182     | 6.34E-28  | -2.636877 | down      | PREDICTED: ethylene-responsive transcription factor RAP2-11-like [Sesamum indicum]                                               |
| c35113.graph_c0 | 249.308429    | 270.460022    | 251.555118    | 22.6409572     | 21.2095962     | 19.3885769     | 6.92E-167 | -4.62365  | down      | hypothetical protein MIMGU_mgv1a002687mg [Erythranthe guttata]                                                                   |
| c35115.graph_c0 | 71.904909     | 78.0509118    | 149.322577    | 37.1746179     | 25.7611579     | 31.834227      | 0.0011051 | -2.679113 | down      | hypothetical protein EUCR02_02009 [Eucalyptus grandis]                                                                           |
| c35119.graph_c0 | 0.03961242    | 0             | 0             | 1.20428695     | 0.96651211     | 0.68190645     | 1.387E-07 | 5.181284  | up        | hypothetical protein EUTSA_v10024694mg [Eutrema salsugineum]                                                                     |
| c35120.graph_c0 | 9.50994623    | 9.60761223    | 10.9759608    | 50.0117515     | 43.3562198     | 44.8971564     | 2.34E-13  | 1.18348   | up        | PREDICTED: uncharacterized protein LOC105156523 [Sesamum indicum]                                                                |
| c35121.graph_c0 | 1.86752454    | 1.38172643    | 1.90422323    | 8.19100664     | 11.4905923     | 13.1122992     | 4.672E-08 | 1.64404   | up        | PREDICTED: LETM1 and EF-hand domain-containing protein 1, mitochondrial [Sesamum indicum]                                        |
| c35127.graph_c0 | 0.67464013    | 0.8441446     | 1.1378578     | 3.84567042     | 4.1974767      | 4.42421581     | 0.0037495 | 1.206032  | up        | PREDICTED: uncharacterized protein LOC105162824 isoform X1 [Sesamum indicum]                                                     |
| c35128.graph_c0 | 0             | 0             | 0.1012367     | 38.8293343     | 51.514824      | 61.2215001     | 7.115E-45 | 9.491773  | up        | PREDICTED: anthocyanidin 3-O-glucosyltransferase 2-like [Sesamum indicum]                                                        |
| c35134.graph_c0 | 1.17905054    | 0.56651097    | 1.09089117    | 5.95247607     | 7.54870048     | 7.77074423     | 1.663E-06 | 1.883263  | up        | PREDICTED: protein-ribulosamine 3-kinase, chloroplastic [Sesamum indicum]                                                        |
| c35135.graph_c0 | 2.91442428    | 2.56852993    | 2.40178136    | 15.9346405     | 14.6547773     | 14.3862916     | 4.221E-11 | 1.498015  | up        | PREDICTED: cytochrome b561 and DOMON domain-containing protein At3g61750 [Sesamum indicum]                                       |
| c35136.graph_c0 | 62.3449402    | 64.945192     | 60.1238094    | 48.8367166     | 50.2744587     | 46.9498794     | 1.736E-17 | -1.376563 | down      | hypothetical protein MIMGU_mgv1a007434mg [Erythranthe guttata]                                                                   |
| c35139.graph_c0 | 0.81062676    | 0.44260281    | 0.37879545    | 4.41292236     | 6.83262821     | 6.40336505     | 3.211E-06 | 2.416061  | up        | PREDICTED: thaumatin-like protein 1 [Sesamum indicum]                                                                            |

| #ID             | 0 h-1<br>FPKM | 0 h-2<br>FPKM | 0 h-3<br>FPKM | 48 h-1<br>FPKM | 48 h-2<br>FPKM | 48 h-3<br>FPKM | FDR       | log2FC    | regulated | nr_annotation                                                                       |
|-----------------|---------------|---------------|---------------|----------------|----------------|----------------|-----------|-----------|-----------|-------------------------------------------------------------------------------------|
| c35141.graph_c1 | 0.19627074    | 0             | 0             | 35.9826649     | 26.626023      | 30.4082564     | 1.649E-41 | 7.897298  | up        | hypothetical protein MIMGU_mgv1a011475mg [Erythranthe guttata]                      |
| c35143.graph_c0 | 15.1794938    | 14.7319112    | 16.3377225    | 129.905288     | 107.613469     | 119.252419     | 1.486E-23 | 1.932028  | up        | PREDICTED: CBL-interacting serine/threonine-protein kinase 6-like [Sesamum indicum] |
| c35152.graph_c0 | 1.1013109     | 0.91867808    | 0.7665819     | 6.63717132     | 8.66593844     | 9.64850912     | 1.731E-14 | 2.142676  | up        | PREDICTED: AR-5 complex subunit mu [Sesamum indicum]                                |
| c35154.graph_c0 | 0.39700398    | 0.50578376    | 0.41740841    | 11.8368694     | 12.0818164     | 11.8933001     | 2.505E-27 | 3.744382  | up        | PREDICTED: transcription factor bHLH66-like [Sesamum indicum]                       |
| c35156.graph_c0 | 245.809332    | 239.388072    | 248.401916    | 46.0222516     | 22.544863      | 18.1807816     | 4.99E-158 | -4.080896 | down      | hypothetical protein MIMGU_mgv1a014857mg [Erythranthe guttata]                      |
| c35156.graph_c1 | 276.095132    | 240.603564    | 258.441988    | 57.9228456     | 32.2056432     | 23.3687961     | 1.45E-128 | -3.774075 | down      | Lactoylglutathione lyase / glyoxalase I family protein [Theobroma cacao]            |
| c35160.graph_c0 | 0             | 0.02678341    | 0.03438331    | 0.7394982      | 0.5744997      | 0.74573453     | 1.089E-08 | 4.045602  | up        | PREDICTED: DNA cross-link repair protein SNM1 [Sesamum indicum]                     |
| c35164.graph_c0 | 0             | 0             | 0.06393933    | 1.1001389      | 1.40826872     | 1.63149496     | 5.749E-10 | 4.961306  | up        | PREDICTED: uncharacterized protein LOC105166066 [Sesamum indicum]                   |
| c35178.graph_c0 | 3.25823607    | 2.85381136    | 2.70407985    | 9.63045284     | 11.9910114     | 14.6899183     | 0.0027577 | 1.020794  | up        | PREDICTED: NEDD8-specific protease 1 [Sesamum indicum]                              |
| c35179.graph_c0 | 8.00535723    | 7.89943917    | 8.82456578    | 34.9528779     | 37.5467326     | 29.8257253     | 6.978E-10 | 1.030598  | up        | hypothetical protein JCGZ_23362 [Jatropha curcas]                                   |
| c35180.graph_c0 | 25.9415548    | 26.092676     | 27.5523428    | 20.7892961     | 22.6338142     | 26.1331779     | 2.883E-12 | -1.215117 | down      | PREDICTED: protein ABSCISIC ACID-INSENSITIVE 5 [Sesamum indicum]                    |
| c35183.graph_c0 | 16.2801119    | 17.9519227    | 19.0609805    | 18.0455748     | 16.1915266     | 15.7602795     | 1.556E-09 | -1.108496 | down      | PREDICTED: NADPH-dependent pterin aldehyde reductase isoform X2 [Sesamum indicum]   |
| c35189.graph_c0 | 0.19264081    | 0.23140045    | 0.14853064    | 9.1576212      | 9.40057097     | 12.6963384     | 9.766E-29 | 4.753459  | up        | PREDICTED: BTB/POZ and TAZ domain-containing protein 3 [Sesamum indicum]            |
| c35192.graph_c0 | 8.13406141    | 6.40454043    | 6.88341356    | 113.455354     | 123.532207     | 134.046874     | 5.843E-87 | 3.095705  | up        | 1,10-sephosphate isomerase, chloroplastic [Cossypium arborescens]                   |
| c35195.graph_c0 | 0             | 0             | 0             | 7.39987759     | 8.34685186     | 6.20541023     | 3.054E-22 | Inf       | up        | PREDICTED: transcription factor bHLH118-like [Sesamum indicum]                      |
| c35198.graph_c0 | 18.1620311    | 16.7568554    | 17.6495459    | 1.48861634     | 1.7977897      | 2.56965002     | 2.82E-100 | -4.189756 | down      | PREDICTED: uncharacterized protein LOC105165319 [Sesamum indicum]                   |
| c35200.graph_c0 | 0.07197531    | 0.14409477    | 0.09249112    | 20.0914303     | 25.2884367     | 27.9073651     | 4.761E-45 | 6.870021  | up        | PREDICTED: probable flavin-containing monooxygenase 1 [Sesamum indicum]             |
| c35204.graph_c0 | 7.45130019    | 7.97179805    | 7.9540152     | 4.46745355     | 4.34795091     | 4.13670328     | 8.387E-14 | -1.868853 | down      | hypothetical protein MIMGU_mgv1a009915mg [Erythranthe guttata]                      |
| c35207.graph_c0 | 0.65666315    | 1.18317726    | 1.18137341    | 12.17988       | 11.7067915     | 10.6222677     | 6.182E-14 | 2.494223  | up        | PREDICTED: nitrilase-like protein 2 [Sesamum indicum]                               |
| c35208.graph_c0 | 1.61861697    | 1.41117483    | 0.40257811    | 6.59003379     | 8.00051569     | 6.71979761     | 0.0001394 | 1.625365  | up        | PREDICTED: uncharacterized protein LOC105165447 [Sesamum indicum]                   |
| c35209.graph_c0 | 7.45048521    | 7.14934109    | 6.40478856    | 36.7808915     | 35.5046917     | 35.5073511     | 1.023E-12 | 1.344226  | up        | PREDICTED: protein Dem40-like isoform AL [Sesamum indicum]                          |

| #ID             | 0 h-1<br>FPKM | 0 h-2<br>FPKM | 0 h-3<br>FPKM | 48 h-1<br>FPKM | 48 h-2<br>FPKM | 48 h-3<br>FPKM | FDR       | log2FC    | regulated | nr_annotation                                                                                   |
|-----------------|---------------|---------------|---------------|----------------|----------------|----------------|-----------|-----------|-----------|-------------------------------------------------------------------------------------------------|
| c35210.graph_c0 | 1.1140593     | 0.84391611    | 0.96730426    | 4.88206918     | 4.73116824     | 4.73894814     | 0.0005021 | 1.278379  | up        | PREDICTED: uncharacterized protein LOC105169721 [Sesamum indicum]                               |
| c35212.graph_c0 | 1.70538173    | 1.60954144    | 1.37750362    | 13.0177593     | 17.7852959     | 16.0166645     | 2.049E-14 | 2.298295  | up        | PREDICTED: cytokinin riboside 5'-monophosphate phosphoribohydrolase LOG8-like [Sesamum indicum] |
| c35214.graph_c0 | 70.4413124    | 66.5048305    | 74.8131162    | 54.1538684     | 21.3736787     | 15.7380354     | 4.338E-16 | -2.210415 | down      | hypothetical protein MIMGU_mgv1a007518mg [Erythranthe guttata]                                  |
| c35218.graph_c0 | 0.08753076    | 0.05257105    | 0.1124805     | 4.01582459     | 4.20302284     | 4.11857284     | 5.21E-25  | 4.587162  | up        | PREDICTED: probable disease resistance protein At5g63020 [Vitis vinifera]                       |
| c35223.graph_c0 | 5.76352858    | 4.9039049     | 5.18445369    | 25.7522315     | 19.6875842     | 21.2605801     | 0.0004576 | 1.06093   | up        | PREDICTED: uncharacterized protein LOC105165107 isoform X2 [Sesamum indicum]                    |
| c35224.graph_c0 | 18.8442804    | 19.8967474    | 19.2766866    | 16.7528278     | 17.327694      | 14.7419819     | 2.022E-16 | -1.265847 | down      | PREDICTED: ruvB-like 2 [Sesamum indicum]                                                        |
| c35227.graph_c0 | 9.04413256    | 9.11649791    | 8.12732057    | 71.7837708     | 77.2189913     | 78.8559087     | 4.524E-35 | 2.097872  | up        | PREDICTED: V-type proton ATPase subunit C-like [Sesamum indicum]                                |
| c35231.graph_c0 | 0.09021589    | 0.04515311    | 0             | 1.20513503     | 1.58486206     | 1.62697117     | 2.806E-08 | 4.023531  | up        | PREDICTED: transcription factor TGA4 isoform X1 [Sesamum indicum]                               |
| c35234.graph_c0 | 84.8779191    | 86.3763098    | 78.860794     | 32.9918502     | 33.5039093     | 33.0019328     | 4.455E-57 | -2.346594 | down      | PREDICTED: uncharacterized protein LOC105155881 [Sesamum indicum]                               |
| c35235.graph_c0 | 10.3705674    | 12.5182067    | 9.82509356    | 3.05354711     | 3.25470868     | 3.23376321     | 6.107E-42 | -2.794814 | down      | PREDICTED: uncharacterized protein LOC105164201 isoform X1 [Sesamum indicum]                    |
| c35239.graph_c0 | 3.06959217    | 2.9702437     | 2.80501153    | 39.8735101     | 44.1717926     | 49.4863679     | 3.322E-60 | 2.896834  | up        | PREDICTED: ran-binding protein 1 homolog c-like [Sesamum indicum]                               |
| c35240.graph_c0 | 17.5115622    | 19.7327554    | 17.616674     | 17.239042      | 16.7000929     | 13.6166124     | 3.761E-07 | -1.220998 | down      | PREDICTED: disease resistance protein RPM1-like [Sesamum indicum]                               |
| c35243.graph_c0 | 0             | 0             | 0             | 12.8469974     | 11.2101168     | 13.3603728     | 8.984E-53 | Inf       | up        | PREDICTED: lycopene epsilon cyclase, chloroplastic [Sesamum indicum]                            |
| c35244.graph_c0 | 6.79262366    | 6.71750466    | 6.62546736    | 0.94244096     | 2.11661207     | 2.71699368     | 2.611E-21 | -2.833103 | down      | PREDICTED: zinc finger CCCH domain-containing protein 39-like isoform X2 [Sesamum indicum]      |
| c35245.graph_c0 | 6.36424758    | 5.67467028    | 7.42233187    | 46.1662261     | 47.7592097     | 49.2327399     | 2.316E-25 | 1.858438  | up        | PREDICTED: alpha-soluble NSF attachment protein 2-like isoform X1 [Sesamum indicum]             |
| c35247.graph_c0 | 0             | 0             | 0             | 3.38380649     | 3.68294452     | 3.21711606     | 2.959E-15 | Inf       | up        | PREDICTED: protein TRANSPARENT TESTA 12-like [Sesamum indicum]                                  |
| c35253.graph_c0 | 3.74979124    | 4.56200217    | 4.78156382    | 35.5287414     | 35.52704       | 38.8013167     | 1.868E-35 | 2.048753  | up        | PREDICTED: argininosuccinate synthase, chloroplastic-like isoform X2 [Sesamum indicum]          |
| c35256.graph_c0 | 3.88442926    | 3.78322923    | 2.02364002    | 0.87046774     | 1.53692504     | 1.3769546      | 2.156E-06 | -2.377168 | down      | PREDICTED: uncharacterized protein LOC105170847 [Sesamum indicum]                               |
| c35258.graph_c0 | 143.807394    | 142.294968    | 135.535553    | 45.2625985     | 28.0703058     | 25.4177573     | 6.52E-99  | -3.100234 | down      | PREDICTED: zinc finger protein 622 [Sesamum indicum]                                            |

| #ID             | 0 h-1<br>FPKM | 0 h-2<br>FPKM | 0 h-3<br>FPKM | 48 h-1<br>FPKM | 48 h-2<br>FPKM | 48 h-3<br>FPKM | FDR       | log2FC    | regulated | nr_annotation                                                                                |
|-----------------|---------------|---------------|---------------|----------------|----------------|----------------|-----------|-----------|-----------|----------------------------------------------------------------------------------------------|
| c35265.graph_c0 | 0.14203193    | 0.3317397     | 0.06083889    | 2.0063526      | 3.09581845     | 3.18238519     | 6.42E-07  | 2.937673  | up        | PREDICTED: auxin response factor 4 isoform X2 [Sesamum indicum]                              |
| c35265.graph_c1 | 0.23165513    | 0.40580243    | 0.14884301    | 3.52136102     | 5.31307229     | 5.26961712     | 1.574E-08 | 3.146176  | up        | PREDICTED: auxin response factor 4 isoform X2 [Sesamum indicum]                              |
| c35272.graph_c0 | 0.23412227    | 0.14061403    | 0.15042819    | 4.70201384     | 5.23255915     | 5.04745696     | 4.726E-19 | 3.818288  | up        | PREDICTED: interactor of constitutive active ROPs 2, chloroplastic-like [Sesamum indicum]    |
| c35275.graph_c0 | 0.14554898    | 0.43708418    | 0.35329061    | 6.19790149     | 6.42387383     | 7.27801841     | 7.727E-30 | 3.387496  | up        | PREDICTED: serine/threonine-protein kinase Nek5 [Sesamum indicum]                            |
| c35277.graph_c0 | 3.37189249    | 3.28644606    | 3.99093519    | 2.04368901     | 1.5588293      | 2.69132404     | 0.0001552 | -1.777859 | down      | -                                                                                            |
| c35281.graph_c0 | 7.87877539    | 7.18666496    | 6.47011915    | 4.85327764     | 4.45896459     | 6.38208569     | 4.384E-08 | -1.47351  | down      | PREDICTED: uncharacterized protein LOC105158079 isoform X1 [Sesamum indicum]                 |
| c35283.graph_c0 | 67.2061862    | 68.4781565    | 65.4847995    | 43.8981271     | 42.6874632     | 39.9543293     | 8.344E-33 | -1.684816 | down      | PREDICTED: DNA-damage-repair/toleration protein DRT111, chloroplastic-like [Sesamum indicum] |
| c35285.graph_c0 | 8.86805911    | 8.59751974    | 9.93339114    | 6.34991977     | 6.64314486     | 6.16056745     | 4.33E-18  | -1.535612 | down      | -                                                                                            |
| c35288.graph_c0 | 4.17401583    | 4.35156458    | 4.13967743    | 47.58054       | 47.7350822     | 44.8640294     | 5.469E-61 | 2.45158   | up        | PREDICTED: valine--tRNA ligase [Sesamum indicum]                                             |
| c35288.graph_c1 | 148.275141    | 158.617944    | 134.860455    | 62.6212955     | 60.7150516     | 62.4828227     | 1.818E-46 | -2.265111 | down      | PREDICTED: protein TIME FOR COFFEE [Sesamum indicum]                                         |
| c35290.graph_c0 | 14.9940452    | 14.9224687    | 12.8946995    | 10.014782      | 10.1591789     | 10.0929354     | 6.05E-20  | -1.516299 | down      | PREDICTED: protein FRIGIDA [Sesamum indicum]                                                 |
| c35292.graph_c0 | 586.521041    | 592.817883    | 629.515466    | 38.6342039     | 34.6656621     | 32.7825187     | 1.01E-198 | -5.107383 | down      | hypothetical protein MIMGU_mgv1a0189502mg, partial [Erythranthe guttata]                     |
| c35295.graph_c1 | 0.04021615    | 0.12076927    | 0.25839673    | 4.92761567     | 5.73045752     | 8.67022567     | 2.152E-12 | 4.48817   | up        | PREDICTED: ras-related protein RABA6a-like [Sesamum indicum]                                 |
| c35297.graph_c0 | 0.53101166    | 1.06308677    | 0.25588913    | 5.56467926     | 8.09766886     | 8.76020133     | 8.644E-08 | 2.582918  | up        | PREDICTED: MATE efflux family protein 9 [Sesamum indicum]                                    |
| c35299.graph_c0 | 3.58774883    | 4.33805597    | 3.97133404    | 34.1980723     | 39.1408752     | 37.1265836     | 4.327E-35 | 2.194991  | up        | PREDICTED: ammonium transporter 2 [Sesamum indicum]                                          |
| c35304.graph_c0 | 1.38373812    | 1.58299854    | 1.27011305    | 0.45528207     | 0.627011       | 0.68868233     | 4.729E-06 | -2.280903 | down      | PREDICTED: uncharacterized protein LOC105174699 [Sesamum indicum]                            |
| c35306.graph_c0 | 7.0319596     | 7.12717225    | 7.20643917    | 5.27460739     | 5.48751298     | 4.70534808     | 1.111E-18 | -1.483304 | down      | PREDICTED: uncharacterized protein LOC105157223 [Sesamum indicum]                            |
| c35309.graph_c0 | 2.80381689    | 2.71094411    | 2.57943171    | 20.6057661     | 21.3006806     | 21.8347085     | 6.256E-22 | 1.959798  | up        | PREDICTED: WD-40 repeat-containing protein MSI4-like [Sesamum indicum]                       |
| c35310.graph_c0 | 1.25281019    | 1.07491259    | 1.30326104    | 7.63950927     | 11.1207809     | 10.7587746     | 2.365E-07 | 1.99818   | up        | PREDICTED: uncharacterized protein LOC105164773 [Sesamum indicum]                            |
| c35323.graph_c0 | 0.7032665     | 0.4399817     | 0.53658689    | 6.31697596     | 6.8636616      | 6.80982414     | 5.984E-16 | 2.555406  | up        | PREDICTED: probable thimet oligopeptidase isoform X2 [Sesamum indicum]                       |
| c35324.graph_c0 | 5.71594504    | 2.83358831    | 3.56767619    | 5294.48772     | 6083.47243     | 6133.63085     | 2.67E-294 | 9.479979  | up        | PREDICTED: vignain-like [Sesamum indicum]                                                    |
| c35328.graph_c0 | 1.31134471    | 0.99761995    | 1.01107792    | 11.6702101     | 8.11413185     | 8.12667346     | 5.719E-07 | 2.063401  | up        | PREDICTED: uncharacterized protein LOC105175059 [Sesamum indicum]                            |

| #ID             | 0 h-1<br>FPKM | 0 h-2<br>FPKM | 0 h-3<br>FPKM | 48 h-1<br>FPKM | 48 h-2<br>FPKM | 48 h-3<br>FPKM | FDR       | log2FC    | regulated | nr_annotation                                                                   |
|-----------------|---------------|---------------|---------------|----------------|----------------|----------------|-----------|-----------|-----------|---------------------------------------------------------------------------------|
| c35329.graph_c0 | 16.4931436    | 17.5116904    | 20.0304914    | 4.87455528     | 5.44313539     | 6.83816437     | 1.609E-36 | -2.678369 | down      | PREDICTED: chromo domain protein LHP1 isoform X3 [Sesamum indicum]              |
| c35338.graph_c0 | 0             | 0             | 0             | 4.77653716     | 8.71750669     | 11.1513418     | 7.6E-13   | Inf       | up        | PREDICTED: dehydrololichyl diphosphate synthase 2-like [Nicotiana glauca]       |
| c35341.graph_c0 | 0.26674821    | 0.13350766    | 0.25708651    | 4.30055241     | 4.71862502     | 5.63057692     | 2.126E-13 | 3.455682  | up        | PREDICTED: transcription factor bHLH79-like [Sesamum indicum]                   |
| c35344.graph_c0 | 30.7258265    | 29.9497374    | 29.1998387    | 28.3773578     | 28.320438      | 27.9401895     | 3.875E-15 | -1.103435 | down      | PREDICTED: microfibrillar-associated protein 1-like [Sesamum indicum]           |
| c35346.graph_c0 | 0             | 0             | 0             | 2.19493787     | 3.17082343     | 3.72853571     | 1.552E-11 | Inf       | up        | hypothetical protein MIMGU_mgv1a024479mg [Erythranthe guttata]                  |
| c35347.graph_c0 | 6.50509292    | 6.28312936    | 6.5261217     | 3.73243007     | 4.51096653     | 5.3792365      | 1.487E-06 | -1.526069 | down      | -                                                                               |
| c35350.graph_c0 | 0             | 0             | 0             | 19.0565744     | 48.5317293     | 8.19747712     | 0.0001511 | Inf       | up        | hypothetical protein EMIHURAFT_425447 [Emiliana huxleyi CCMP1516]               |
| c35357.graph_c0 | 0             | 0             | 0             | 9.54692705     | 7.09598071     | 10.481485      | 4.376E-20 | Inf       | up        | --                                                                              |
| c35358.graph_c0 | 11.7751118    | 7.24052602    | 6.26875802    | 1.54971444     | 1.97008144     | 1.24103393     | 3.337E-08 | -3.422889 | down      | ubiquitin-like protein [Vanilla planifolia]                                     |
| c35359.graph_c0 | 1.1090211     | 0.44405265    | 0.78382481    | 10.0637704     | 12.3390179     | 10.3183396     | 1.597E-12 | 2.78878   | up        | PREDICTED: sphinganine C(4)-monooxygenase 1-like [Sesamum indicum]              |
| c35363.graph_c0 | 4.96527998    | 4.18921236    | 4.14737788    | 42.083926      | 42.6444333     | 42.7373103     | 5.76E-39  | 2.244059  | up        | PREDICTED: F-box protein At4g00735-like [Sesamum indicum]                       |
| c35370.graph_c0 | 0.10760819    | 0.14362125    | 0.09218719    | 8.82307563     | 11.7274827     | 10.5558365     | 4.954E-34 | 5.481825  | up        | PREDICTED: protein STICHEL-like 2 [Sesamum indicum]                             |
| c35372.graph_c0 | 0.912464      | 1.3986096     | 0.4763494     | 13.1872475     | 14.3320701     | 13.9544987     | 3.089E-27 | 2.883568  | up        | PREDICTED: vacuolar amino acid transporter 1 isoform X2 [Sesamum indicum]       |
| c35373.graph_c0 | 40.5765862    | 44.2626839    | 41.4219381    | 21.1774666     | 20.9224889     | 22.2100202     | 7.715E-44 | -1.990826 | down      | PREDICTED: E3 ubiquitin-protein ligase KEG [Sesamum indicum]                    |
| c35374.graph_c0 | 0.05080182    | 0             | 0             | 6.36506538     | 7.68505382     | 8.8701922      | 8.172E-24 | 7.81686   | up        | PREDICTED: mitogen-activated protein kinase 19 isoform X2 [Sesamum indicum]     |
| c35375.graph_c0 | 0.5971671     | 0.52304444    | 0.38369169    | 24.7796408     | 28.8008467     | 28.3309426     | 5.16E-99  | 4.751228  | up        | PREDICTED: uncharacterized protein At1g04910 [Sesamum indicum]                  |
| c35376.graph_c0 | 0             | 0             | 0             | 6.16763055     | 9.74541339     | 10.0456851     | 3.297E-16 | Inf       | up        | PREDICTED: uncharacterized protein LOC105165561 [Sesamum indicum]               |
| c35379.graph_c0 | 1.04975661    | 0.52540389    | 0.86720066    | 4.76644243     | 4.09811879     | 4.54848165     | 0.0038719 | 1.441942  | up        | PREDICTED: uncharacterized protein LOC105136996 isoform X1 [Populus euphratica] |
| c35381.graph_c0 | 0.04913738    | 0.09837318    | 0.03157174    | 2.01445109     | 1.58256629     | 2.31608252     | 5.197E-11 | 4.035603  | up        | PREDICTED: uncharacterized protein LOC105165535 [Sesamum indicum]               |
| c35381.graph_c1 | 0             | 0.08249995    | 0.05295483    | 1.74635102     | 1.64895507     | 2.1281573      | 1.463E-09 | 4.325566  | up        | PREDICTED: uncharacterized protein LOC105165535 [Sesamum indicum]               |
| c35382.graph_c0 | 0.0278963     | 0.02792424    | 0             | 4.54888102     | 5.60853954     | 8.00366351     | 3.723E-19 | 7.338434  | up        | PREDICTED: bidirectional sugar transporter SWEET3b [Sesamum indicum]            |

| #ID             | 0 h-1<br>FPKM | 0 h-2<br>FPKM | 0 h-3<br>FPKM | 48 h-1<br>FPKM | 48 h-2<br>FPKM | 48 h-3<br>FPKM | FDR       | log2FC    | regulated | nr_annotation                                                                                                                        |
|-----------------|---------------|---------------|---------------|----------------|----------------|----------------|-----------|-----------|-----------|--------------------------------------------------------------------------------------------------------------------------------------|
| c35387.graph_c0 | 0.90459799    | 0.9531619     | 0.79535658    | 25.2205493     | 17.8895197     | 15.6502232     | 3.607E-10 | 3.461359  | up        | PREDICTED: transcription factor bHLH121 [Sesamum indicum]                                                                            |
| c35389.graph_c0 | 9.09735913    | 9.86534115    | 7.79364444    | 5.41278122     | 8.13884376     | 6.52525573     | 1.548E-05 | -1.435871 | down      | PREDICTED: protein ETHYLENE INSENSITIVE 3 [Sesamum indicum]                                                                          |
| c35396.graph_c0 | 0.52541626    | 0.5976618     | 0.55242057    | 3.08030373     | 3.75268954     | 3.44562206     | 5.046E-05 | 1.596428  | up        | PREDICTED: ycf20-like protein [Sesamum indicum]                                                                                      |
| c35397.graph_c0 | 0.27248524    | 0.27275809    | 0.30013228    | 4.73373076     | 4.82485868     | 4.78641496     | 1.819E-10 | 3.066022  | up        | PREDICTED: 2-amino-3-ketobutyrate coenzyme A ligase, mitochondrial [Sesamum indicum]                                                 |
| c35400.graph_c0 | 0.35725835    | 0.22351005    | 0.05738639    | 2.01591936     | 2.22279037     | 2.26964656     | 5.475E-05 | 2.343911  | up        | PREDICTED: transcription factor bHLH68-like [Sesamum indicum]                                                                        |
| c35407.graph_c0 | 0             | 0.09979194    | 0.25621664    | 21.4912342     | 23.837617      | 21.492687      | 2E-57     | 6.513419  | up        | PREDICTED: rac-like GTP-binding protein ARAC8 [Sesamum indicum]                                                                      |
| c35410.graph_c0 | 0.03193067    | 0             | 0.12309654    | 0.91191518     | 0.59210347     | 0.8637661      | 1.041E-06 | 2.899188  | up        | PREDICTED: serine/threonine protein phosphatase 2A 57 kDa regulatory subunit B&#x27E8; beta isoform-like [Nicotiana tomentosiformis] |
| c35413.graph_c0 | 0             | 0.08767766    | 0             | 2.17872659     | 2.22261157     | 2.44122243     | 6.121E-10 | 5.279346  | up        | PREDICTED: inositol hexakisphosphate and diphosphoinositol-pentakisphosphate kinase 2-like isoform X2 [Sesamum indicum]              |
| c35415.graph_c0 | 8.12513095    | 6.38612078    | 7.81150082    | 4.71303        | 4.52296533     | 4.24296253     | 1.502E-08 | -1.744362 | down      | hypothetical protein MIMGU_mgv1a019839mg, partial [Erythranthe guttata]                                                              |
| c35424.graph_c0 | 1.96455968    | 1.71087839    | 2.29732864    | 1.26691636     | 1.47635869     | 1.86808813     | 3.304E-05 | -1.397569 | down      | PREDICTED: transcription factor bHLH13-like [Sesamum indicum]                                                                        |
| c35426.graph_c0 | 22.5116206    | 22.8495262    | 18.4758505    | 101.505852     | 122.767236     | 146.830486     | 2.461E-11 | 1.519227  | up        | PREDICTED: aspartic proteinase nepenthesin-1 [Sesamum indicum]                                                                       |
| c35429.graph_c0 | 6.25550346    | 5.86732536    | 4.17752436    | 26.8636446     | 28.6029908     | 30.121148      | 3.038E-11 | 1.3774    | up        | hypothetical protein MIMGU_mgv1a011469mg [Erythranthe guttata]                                                                       |
| c35430.graph_c0 | 4.42442609    | 4.19369597    | 4.07549185    | 0.39678557     | 0.15285316     | 0.19257677     | 7.604E-32 | -5.095069 | down      | unnamed protein product [Coffea canephora]                                                                                           |
| c35431.graph_c0 | 1.88937126    | 2.30641851    | 2.25026441    | 0.76417114     | 0.58467259     | 0.56662907     | 4.442E-09 | -2.763549 | down      | PREDICTED: cysteine-rich repeat secretory protein 3-like isoform X1 [Sesamum indicum]                                                |
| c35434.graph_c1 | 1.22029238    | 4.6417544     | 5.01799686    | 15.2892959     | 20.0082504     | 16.4052137     | 0.0073722 | 1.219683  | up        | PREDICTED: coatomer subunit beta&#x27E8;-2-like isoform X1 [Solanum tuberosum]                                                       |
| c35440.graph_c0 | 1.77447552    | 1.42567626    | 1.23014636    | 0              | 0              | 0              | 3.419E-32 | -Inf      | down      | predicted protein [Thalassiosira pseudonana CCMP1335]                                                                                |
| c35441.graph_c0 | 5.69298877    | 4.73280987    | 4.3398315     | 0.26668233     | 0.65920773     | 0.23729234     | 1.904E-18 | -4.6925   | down      | -                                                                                                                                    |
| c35445.graph_c0 | 48.3048656    | 53.0593711    | 48.4506276    | 214.524854     | 217.816268     | 204.258332     | 7.389E-14 | 1.070324  | up        | PREDICTED: uncharacterized protein LOC105177185 [Sesamum indicum]                                                                    |
| c35457.graph_c0 | 3.68143262    | 4.25605295    | 4.99730987    | 1.57636624     | 3.59296337     | 6.248129       | 0.0063567 | -1.216028 | down      | PREDICTED: U6 snRNA-associated Sm-like protein LSm1 [Vitis vinifera]                                                                 |
| c35463.graph_c0 | 131.951969    | 132.147419    | 134.691624    | 20.1050587     | 20.8049849     | 22.1931775     | 1.18E-130 | -3.678639 | down      | PREDICTED: BTB/POZ and TAZ domain-containing protein 1 [Sesamum indicum]                                                             |

| #ID             | 0 h-1<br>FPKM | 0 h-2<br>FPKM | 0 h-3<br>FPKM | 48 h-1<br>FPKM | 48 h-2<br>FPKM | 48 h-3<br>FPKM | FDR       | log2FC    | regulated | nr_annotation                                                                                    |
|-----------------|---------------|---------------|---------------|----------------|----------------|----------------|-----------|-----------|-----------|--------------------------------------------------------------------------------------------------|
| c35467.graph_c0 | 18.3740197    | 20.9125335    | 19.6382803    | 13.1024164     | 13.8804214     | 13.9032463     | 4.853E-19 | -1.546003 | down      | PREDICTED: common plant regulatory factor 1-like isoform X2 [Sesamum indicum]                    |
| c35468.graph_c0 | 1.35796447    | 1.50829131    | 1.60161032    | 14.7383436     | 16.1944549     | 16.9263248     | 4.882E-36 | 2.400198  | up        | PREDICTED: alpha,alpha-trehalose-phosphate synthase [UDP-forming] 5 isoform X1 [Sesamum indicum] |
| c35469.graph_c0 | 11.2656893    | 9.65232197    | 13.6180602    | 60.6889373     | 59.0746224     | 73.3313194     | 6.504E-15 | 1.461712  | up        | hypothetical protein MIMGU_mgv1a016480mg [Erythranthe guttata]                                   |
| c35476.graph_c0 | 2.30957079    | 2.03445746    | 2.07752293    | 0.55320909     | 1.03687175     | 0.60583645     | 2.587E-08 | -2.573101 | down      | hypothetical protein MIMGU_mgv1a012316mg [Erythranthe guttata]                                   |
| c35479.graph_c0 | 1.70482551    | 1.80691691    | 1.54642467    | 11.8718615     | 12.185302      | 13.1119066     | 7.98E-09  | 1.860193  | up        | PREDICTED: glycine-rich RNA-binding protein 8-like [Sesamum indicum]                             |
| c35484.graph_c0 | 15.6273844    | 16.5143954    | 14.3821965    | 135.148175     | 152.397028     | 167.553727     | 3.549E-56 | 2.270836  | up        | PREDICTED: 60S ribosomal protein L4-1 [Sesamum indicum]                                          |
| c35493.graph_c0 | 0             | 0             | 0             | 1.3360237      | 1.15539192     | 1.64974363     | 6.625E-13 | Inf       | up        | PREDICTED: probable inactive purple acid phosphatase 27 isoform X1 [Sesamum indicum]             |
| c35495.graph_c0 | 32.7029237    | 34.5576378    | 37.8834462    | 1.75930314     | 2.62092425     | 2.22582781     | 3.05E-137 | -5.017471 | down      | PREDICTED: CBL-interacting protein kinase 18-like [Sesamum indicum]                              |
| c35500.graph_c0 | 7.25863693    | 5.95967518    | 6.39309872    | 132.014461     | 143.674008     | 147.350225     | 3.2E-87   | 3.412479  | up        | PREDICTED: nascent polypeptide-associated complex subunit alpha-like protein 2 [Vitis vinifera]  |
| c35503.graph_c0 | 6.8383437     | 9.01761724    | 6.68274182    | 4.75323928     | 8.03279057     | 8.82804111     | 5.603E-05 | -1.086216 | down      | hypothetical protein MIMGU_mgv1a013110mg [Erythranthe guttata]                                   |
| c35504.graph_c0 | 58.6007934    | 60.1087073    | 63.167052     | 421.034097     | 426.992819     | 445.276541     | 4.278E-38 | 1.811291  | up        | PREDICTED: 40S ribosomal protein S8 [Sesamum indicum]                                            |
| c35508.graph_c0 | 3.01749558    | 2.41641372    | 2.4898282     | 33.8564232     | 37.943762      | 35.5670529     | 4.14E-51  | 2.742415  | up        | PREDICTED: acyl-CoA-binding domain-containing protein 4 [Sesamum indicum]                        |
| c35509.graph_c0 | 1.3811396     | 0.81694517    | 0.72606235    | 6.13063472     | 5.51433745     | 5.50646419     | 0.0009583 | 1.542038  | up        | PREDICTED: uncharacterized protein LOC103335354 [Prunus mume]                                    |
| c35510.graph_c0 | 0             | 0.32190479    | 0.2066233     | 3.25889329     | 5.64938555     | 6.59032649     | 5.16E-07  | 3.840454  | up        | PREDICTED: beta-glucosidase 24-like [Sesamum indicum]                                            |
| c35510.graph_c1 | 0.24092456    | 0.48233162    | 0.4127968     | 83.4552386     | 90.9188109     | 110.201987     | 6.292E-89 | 6.945634  | up        | PREDICTED: NADPH--cytochrome P450 reductase-like [Sesamum indicum]                               |
| c35515.graph_c0 | 2.33709346    | 2.8898887     | 1.94328435    | 11.5253263     | 12.2096857     | 11.6074956     | 0.0004061 | 1.285863  | up        | PREDICTED: putative 1-phosphatidylinositol-3-phosphate 5-kinase FAB1D [Sesamum indicum]          |
| c35517.graph_c0 | 10.8808782    | 10.0247669    | 10.6432884    | 3.09203399     | 3.01147097     | 3.70534382     | 1.153E-42 | -2.704088 | down      | PREDICTED: putative lysine-specific demethylase JM16 isoform X1 [Sesamum indicum]                |
| c35522.graph_c0 | 2.78382228    | 1.42728798    | 1.48327979    | 0              | 0              | 0              | 6.843E-12 | -Inf      | down      | hypothetical protein SNOG_05978 [Phaeosphaeria nodorum SN15]                                     |
| c35526.graph_c1 | 0             | 0.0675518     | 0             | 1.58535714     | 2.43691236     | 2.79362287     | 6.591E-13 | 5.642529  | up        | PREDICTED: L-ascorbate oxidase homolog [Sesamum indicum]                                         |
| c35528.graph_c0 | 16.2079293    | 11.9416399    | 13.6385288    | 8.48914611     | 9.71589049     | 11.869929      | 9.815E-09 | -1.495163 | down      | PREDICTED: protein N-terminal glutamine amidohydrolase [Sesamum indicum]                         |



| #ID             | 0 h-1<br>FPKM | 0 h-2<br>FPKM | 0 h-3<br>FPKM | 48 h-1<br>FPKM | 48 h-2<br>FPKM | 48 h-3<br>FPKM | FDR       | log2FC    | regulated | nr_annotation                                                                                        |
|-----------------|---------------|---------------|---------------|----------------|----------------|----------------|-----------|-----------|-----------|------------------------------------------------------------------------------------------------------|
| c35529.graph_c0 | 97.179447     | 102.059079    | 100.1361      | 85.2933853     | 83.3992324     | 80.0175453     | 1.459E-19 | -1.284275 | down      | PREDICTED: uncharacterized protein LOC105166406 [Sesamum indicum]                                    |
| c35533.graph_c0 | 55.4728921    | 48.070331     | 53.5441039    | 21.6591648     | 20.1343882     | 18.8102778     | 4.782E-61 | -2.389674 | down      | hypothetical protein MIMGU_mgv1a026579mg [Erythranthe guttata]                                       |
| c35537.graph_c0 | 2.37791456    | 1.45139981    | 3.57742169    | 16.1363019     | 17.6604968     | 14.0251834     | 7.42E-09  | 1.666512  | up        | hypothetical protein MIMGU_mgv1a013138mg [Erythranthe guttata]                                       |
| c35540.graph_c0 | 41.3697896    | 37.3264354    | 44.5727484    | 3.43531475     | 2.67797505     | 3.63346248     | 3.44E-101 | -4.677153 | down      | PREDICTED: ras-related protein RABC2a-like [Sesamum indicum]                                         |
| c35549.graph_c0 | 3.1694646     | 3.29466289    | 3.13299038    | 37.7717535     | 38.4282859     | 38.5388549     | 1.088E-41 | 2.562117  | up        | allene oxide cyclase [Salvia miltiorrhiza]                                                           |
| c35557.graph_c0 | 1.41596184    | 1.0838786     | 0.21406671    | 6.98278546     | 10.8928961     | 10.7195468     | 5.755E-07 | 2.385237  | up        | --                                                                                                   |
| c35559.graph_c0 | 4.54759744    | 3.37962739    | 2.74483523    | 26.7876865     | 28.3783056     | 27.2809414     | 1.845E-13 | 1.935672  | up        | PREDICTED: AP-2 complex subunit sigma-like [Camelina sativa]                                         |
| c35583.graph_c0 | 628.040481    | 704.20716     | 655.342701    | 235.473429     | 170.46129      | 153.400652     | 2.927E-85 | -2.839196 | down      | PREDICTED: probable xyloglucan endotransglucosylase/hydrolase protein 23 [Nicotiana tomentosiformis] |
| c35583.graph_c1 | 355.409371    | 376.017552    | 381.101463    | 140.103661     | 99.222808      | 93.5666502     | 3.615E-80 | -2.751142 | down      | PREDICTED: probable xyloglucan endotransglucosylase/hydrolase protein 25 [Prunus mume]               |
| c35586.graph_c0 | 1.21413932    | 1.51386337    | 1.39598372    | 25.7853904     | 34.4470559     | 45.5905346     | 3.039E-14 | 3.656222  | up        | PREDICTED: probable galactinol--sucrose galactosyltransferase 6 [Sesamum indicum]                    |
| c35595.graph_c0 | 1584.50283    | 1516.13061    | 1578.39165    | 80.1706195     | 77.4204623     | 64.5509401     | 2.03E-156 | -5.412127 | down      | PREDICTED: cysteine proteinase 15A [Nicotiana tomentosiformis]                                       |
| c35599.graph_c0 | 3.14639204    | 2.04720274    | 3.23459067    | 1.73919694     | 3.22431947     | 1.54752698     | 0.0060394 | -1.398908 | down      | -                                                                                                    |
| c35599.graph_c1 | 18.4584802    | 18.9017213    | 20.7208128    | 14.3175594     | 13.2005738     | 12.9135988     | 1.029E-16 | -1.539408 | down      | PREDICTED: uncharacterized protein LOC105161992 [Sesamum indicum]                                    |
| c35601.graph_c0 | 7.37851039    | 7.21108468    | 7.91074908    | 33.2236019     | 34.5359129     | 31.4411121     | 6.736E-14 | 1.122082  | up        | PREDICTED: protein transport protein SEC24 [Sesamum indicum]                                         |
| c35616.graph_c0 | 32.1422369    | 29.4444715    | 29.6638156    | 153.979931     | 160.936684     | 177.57061      | 5.073E-21 | 1.413705  | up        | PREDICTED: uncharacterized protein LOC105173072 [Sesamum indicum]                                    |
| c35618.graph_c1 | 9.14005645    | 8.25857789    | 10.2901602    | 53.4286583     | 60.3114439     | 64.9123409     | 5.011E-19 | 1.667791  | up        | PREDICTED: uncharacterized protein LOC105168327 [Sesamum indicum]                                    |
| c35626.graph_c0 | 1.88259169    | 1.51288984    | 1.9592152     | 0.26870463     | 0.2587818      | 0.35863765     | 5.496E-25 | -3.615884 | down      | PREDICTED: phosphatidylinositol/phosphatidylcholine transfer protein SFH2 [Sesamum indicum]          |
| c35628.graph_c0 | 2.23381846    | 1.63404041    | 1.43527258    | 23.5079986     | 26.664754      | 23.170989      | 8.885E-31 | 2.774573  | up        | PREDICTED: uncharacterized protein At4g15545 [Sesamum indicum]                                       |
| c35629.graph_c0 | 7.59210431    | 6.84393472    | 6.73767584    | 33.7351397     | 31.7673688     | 28.882649      | 2.588E-10 | 1.141708  | up        | PREDICTED: KH domain-containing protein At1g09660/At1g09670 [Sesamum indicum]                        |
| c35636.graph_c0 | 5.90986294    | 5.98620673    | 5.67320349    | 25.3754976     | 27.8092374     | 26.9765286     | 1.067E-14 | 1.171403  | up        | PREDICTED: extra-large guanine nucleotide-binding protein 3 [Sesamum indicum]                        |

| #ID             | 0 h-1<br>FPKM | 0 h-2<br>FPKM | 0 h-3<br>FPKM | 48 h-1<br>FPKM | 48 h-2<br>FPKM | 48 h-3<br>FPKM | FDR       | log2FC    | regulated | nr_annotation                                                                                          |
|-----------------|---------------|---------------|---------------|----------------|----------------|----------------|-----------|-----------|-----------|--------------------------------------------------------------------------------------------------------|
| c35641.graph_c0 | 0             | 0             | 0             | 5.50705902     | 5.20674285     | 4.26787084     | 2.296E-16 | Inf       | up        | -                                                                                                      |
| c35645.graph_c0 | 0.03630618    | 0             | 0             | 1.27100966     | 1.38191432     | 2.02378156     | 3.023E-11 | 6.008444  | up        | hypothetical protein MIMGU_mgv1a021537mg<br>[Erythranthe guttata]                                      |
| c35649.graph_c0 | 0.21863511    | 0.25532972    | 0.18730318    | 1.34280618     | 1.7426119      | 2.50912382     | 0.000148  | 2.058132  | up        | PREDICTED: pto-interacting protein 1-like [Sesamum indicum]                                            |
| c35653.graph_c0 | 16.875585     | 14.2025975    | 14.0888604    | 140.714205     | 155.259017     | 160.451313     | 1.623E-44 | 2.318834  | up        | PREDICTED: macrophage migration inhibitory factor homolog isoform X1 [Eucalyptus grandis]              |
| c35660.graph_c0 | 1.6693277     | 1.0152907     | 1.00469153    | 0              | 0              | 0              | 2.115E-21 | -Inf      | down      | hypothetical protein LHAOC_20910 [Naiaassiosira oceanica]                                              |
| c35664.graph_c0 | 2.10293773    | 4.33391309    | 2.38443374    | 1.82340085     | 2.17313111     | 1.11543514     | 0.0034151 | -1.801789 | down      | hypothetical protein L484_005397 [Morus notabilis]                                                     |
| c35667.graph_c0 | 81.2537371    | 79.4280037    | 80.1965109    | 89.3720917     | 81.4620422     | 69.7723489     | 3.792E-13 | -1.015945 | down      | PREDICTED: putative glutathione-specific gamma-glutamylcyclotransferase 2 isoform X1 [Sesamum indicum] |
| c35671.graph_c0 | 0.23357718    | 0.18704886    | 0.06003119    | 1.82908557     | 1.84650876     | 1.51262633     | 6.577E-06 | 2.426802  | up        | PREDICTED: E3 ubiquitin-protein ligase ORTHRUS 2-like [Sesamum indicum]                                |
| c35679.graph_c0 | 1.44421421    | 1.22325109    | 1.4989739     | 15.5054928     | 13.2819024     | 13.7966943     | 1.909E-12 | 2.337721  | up        | PREDICTED: serine/threonine-protein kinase At5g01020 [Sesamum indicum]                                 |
| c35683.graph_c0 | 3.46573409    | 2.36201157    | 2.17942398    | 0.67933198     | 0.57573589     | 0.42312586     | 1.226E-10 | -3.26243  | down      | -                                                                                                      |
| c35685.graph_c0 | 6.61998551    | 6.77278975    | 5.75469706    | 234.443603     | 245.751706     | 260.159609     | 4.83E-160 | 4.255811  | up        | hypothetical protein FOP1K_0014802050 [Populus trichocarpa]                                            |
| c35685.graph_c2 | 0.38816723    | 0.51807457    | 0.49881026    | 4.41046134     | 4.29350989     | 5.09111609     | 7.396E-05 | 2.275687  | up        | -                                                                                                      |
| c35687.graph_c0 | 246.167261    | 242.351856    | 259.752647    | 49.1790052     | 33.2814957     | 32.3132023     | 2.79E-116 | -3.714603 | down      | PREDICTED: ubiquitin carboxyl-terminal hydrolase 19-like [Sesamum indicum]                             |
| c35689.graph_c0 | 33.5426055    | 31.0305894    | 30.5282525    | 22.064124      | 19.6356384     | 20.1866687     | 1.197E-28 | -1.63445  | down      | hypothetical protein MIMGU_mgv1a010259mg<br>[Erythranthe guttata]                                      |
| c35690.graph_c0 | 4.75461583    | 4.66124538    | 4.93408712    | 1.70092657     | 4.01845322     | 2.98676773     | 2.011E-17 | -1.751632 | down      | PREDICTED: UDP-glycosyltransferase 73C3-like [Sesamum indicum]                                         |
| c35693.graph_c0 | 130.313951    | 138.415702    | 144.453854    | 33.9232775     | 49.1920363     | 55.1320393     | 5.567E-68 | -2.605287 | down      | hypothetical protein MIMGU_mgv1a013946mg<br>[Erythranthe guttata]                                      |
| c35699.graph_c0 | 11.9143396    | 14.201954     | 12.1184776    | 7.91222055     | 7.88897719     | 9.317973       | 3.781E-16 | -1.62426  | down      | PREDICTED: trihelix transcription factor GT-4-like isoform X2 [Sesamum indicum]                        |
| c35713.graph_c0 | 28.3624123    | 28.9570848    | 28.05381      | 22.5995976     | 16.9397641     | 13.4059907     | 8.351E-32 | -1.698739 | down      | PREDICTED: uncharacterized protein LOC105178130 [Sesamum indicum]                                      |
| c35716.graph_c0 | 4.26491438    | 3.57420144    | 3.44129683    | 1.55337196     | 1.64560923     | 1.62609533     | 2.108E-06 | -2.241946 | down      | PREDICTED: wound-induced protein 1 [Sesamum indicum]                                                   |
| c35719.graph_c1 | 9.51224092    | 8.90185935    | 8.84938156    | 5.75091351     | 4.83523455     | 2.98499148     | 8.047E-27 | -2.01622  | down      | PREDICTED: solute carrier family 25 member 44-like [Sesamum indicum]                                   |
| c35725.graph_c0 | 1.12722524    | 1.16154087    | 0.85207592    | 3.48194028     | 6.50374909     | 6.79431912     | 0.0014996 | 1.392183  | up        | PREDICTED: LOW QUALITY PROTEIN: ankyrin repeat-containing protein At3g12360-like [Sesamum indicum]     |
| c35732.graph_c0 | 1.71253766    | 1.61341412    | 1.52105733    | 0.13920895     | 0.19663333     | 0.33031275     | 1.794E-16 | -3.889244 | down      | PREDICTED: zinc finger BED domain-containing protein DAYSLEEPER-like isoform X1 [Sesamum indicum]      |

| #ID             | 0 h-1<br>FPKM | 0 h-2<br>FPKM | 0 h-3<br>FPKM | 48 h-1<br>FPKM | 48 h-2<br>FPKM | 48 h-3<br>FPKM | FDR       | log2FC    | regulated | nr_annotation                                                                                     |
|-----------------|---------------|---------------|---------------|----------------|----------------|----------------|-----------|-----------|-----------|---------------------------------------------------------------------------------------------------|
| c35735.graph_c0 | 14.4521098    | 15.1856804    | 16.0736077    | 9.42117756     | 11.2591013     | 9.21426983     | 2.427E-18 | -1.633049 | down      | PREDICTED: uncharacterized protein LOC105166332 [Sesamum indicum]                                 |
| c35736.graph_c1 | 0.60692411    | 0.70878716    | 0.12998692    | 9.45875246     | 7.55232216     | 6.26043103     | 9.951E-10 | 3.009049  | up        | PREDICTED: RING-H2 finger protein ATL57 [Solanum lycopersicum]                                    |
| c35738.graph_c0 | 9.73231362    | 11.3133589    | 10.4316125    | 8.8420876      | 9.93615028     | 9.85292779     | 6.176E-08 | -1.15644  | down      | PREDICTED: F-box/FBD/LRR-repeat protein At1g13570-like [Sesamum indicum]                          |
| c35739.graph_c0 | 26.0704352    | 25.0224454    | 23.6451428    | 22.8095736     | 25.2499989     | 24.9218353     | 8.429E-12 | -1.052669 | down      | PREDICTED: 5'-adenylylsulfate reductase-like 4 [Sesamum indicum]                                  |
| c35742.graph_c0 | 0.04162066    | 0             | 0             | 2.83743133     | 2.39660746     | 3.61650419     | 2.344E-14 | 6.735906  | up        | PREDICTED: thiol-disulfide oxidoreductase LTO1-like [Sesamum indicum]                             |
| c35746.graph_c0 | 0.53269439    | 0.5332278     | 0.47917337    | 19.335661      | 26.0466445     | 21.178442      | 1.244E-39 | 4.408458  | up        | PREDICTED: probable pectinesterase/pectinesterase inhibitor 61 [Sesamum indicum]                  |
| c35749.graph_c0 | 1.55297444    | 1.34011164    | 1.10103925    | 0.09866906     | 0.1045279      | 0.30728297     | 5.693E-12 | -3.992223 | down      | PREDICTED: oligopeptide transporter 7 isoform X1 [Malus domestica]                                |
| c35752.graph_c0 | 0.08353479    | 0             | 0             | 29.2054448     | 35.3828678     | 38.3468362     | 9.63E-110 | 9.266794  | up        | PREDICTED: probable galactinol--sucrose galactosyltransferase 6 [Sesamum indicum]                 |
| c35760.graph_c0 | 32.9544458    | 37.5759238    | 31.8404267    | 6.84807178     | 6.52923151     | 6.49959797     | 1.793E-44 | -3.380202 | down      | Ubiquitin-like protein [Medicago truncatula]                                                      |
| c35761.graph_c0 | 1.03711553    | 1.1535045     | 1.55485694    | 0.07962154     | 0.22493164     | 0.30700266     | 3.232E-12 | -3.653229 | down      | PREDICTED: probable leucine-rich repeat receptor-like protein kinase At5g63930 [Sesamum indicum]  |
| c35764.graph_c0 | 1.83027332    | 3.09167898    | 1.76398026    | 272.210611     | 278.214613     | 313.758896     | 1.88E-193 | 5.997814  | up        | PREDICTED: pistil-specific extensin-like protein [Sesamum indicum]                                |
| c35766.graph_c0 | 19.9220317    | 20.9637428    | 20.8287563    | 158.793228     | 165.869052     | 168.6315       | 6.756E-43 | 1.9801    | up        | PREDICTED: staphylococcal nuclease domain-containing protein 1 [Sesamum indicum]                  |
| c35772.graph_c0 | 176.962155    | 175.50605     | 158.591457    | 10.2491039     | 6.94891699     | 6.93088916     | 5.74E-237 | -5.412967 | down      | -                                                                                                 |
| c35780.graph_c0 | 0.85803083    | 0.73619144    | 0.68256412    | 0.26349132     | 0.79753459     | 0.4354127      | 0.0010122 | -1.636194 | down      | unnamed protein product [Coffea canephora]                                                        |
| c35783.graph_c0 | 14.938512     | 8.19708525    | 8.41843347    | 0              | 0              | 0              | 1.536E-22 | -Inf      | down      | uncharacterized protein LOC100273336 [Zea mays]                                                   |
| c35784.graph_c0 | 2.61913173    | 1.74783626    | 2.46817118    | 0              | 0              | 0              | 5.427E-24 | -Inf      | down      | RNA(5')-binding protein [Auricularia anemata 1FB-100408851]                                       |
| c35787.graph_c0 | 4.00547614    | 3.35873258    | 3.66501873    | 1.7774332      | 1.12569154     | 1.52997711     | 2.996E-17 | -2.325607 | down      | PREDICTED: probable LRR receptor-like serine/threonine-protein kinase At4g36180 [Sesamum indicum] |
| c35789.graph_c0 | 2.0794413     | 2.04974456    | 1.87663454    | 9.68095133     | 9.06289959     | 7.41693323     | 1.31E-07  | 1.109446  | up        | PREDICTED: pentatricopeptide repeat-containing protein At4g01570 [Sesamum indicum]                |
| c35796.graph_c0 | 13.9498832    | 11.5140533    | 12.8942498    | 11.6114812     | 13.1369437     | 12.4884695     | 2.113E-06 | -1.062033 | down      | PREDICTED: cytochrome c oxidase-assembly factor COX23, mitochondrial-like [Citrus sinensis]       |
| c35799.graph_c0 | 66.5904956    | 72.6654824    | 69.2457515    | 18.0273396     | 18.7037409     | 21.8876113     | 9.863E-85 | -2.850056 | down      | PREDICTED: GTP cyclohydrolase 1 [Sesamum indicum]                                                 |
| c35804.graph_c0 | 2.2056856     | 2.48929255    | 3.33458038    | 24.1053524     | 24.882452      | 27.192112      | 2.031E-39 | 2.22311   | up        | hypothetical protein MIMGU_mgv1a001397mg [Erythranthe guttata]                                    |
| c35805.graph_c0 | 27.6421366    | 29.4276632    | 32.0109056    | 18.9944455     | 22.2805408     | 24.1521071     | 3.063E-17 | -1.467607 | down      | PREDICTED: DAG protein, cnidoplastic [Sesamum indicum]                                            |

| #ID             | 0 h-1<br>FPKM | 0 h-2<br>FPKM | 0 h-3<br>FPKM | 48 h-1<br>FPKM | 48 h-2<br>FPKM | 48 h-3<br>FPKM | FDR       | log2FC    | regulated | nr_annotation                                                                |
|-----------------|---------------|---------------|---------------|----------------|----------------|----------------|-----------|-----------|-----------|------------------------------------------------------------------------------|
| c35811.graph_c1 | 0.04523853    | 0             | 0.1743999     | 0.79185696     | 1.10378478     | 1.03834252     | 1.915E-06 | 2.69504   | up        | PREDICTED: phosphatidylinositol 4-kinase alpha 1-like [Sesamum indicum]      |
| c35812.graph_c0 | 1294.50295    | 1071.59934    | 1135.28011    | 285.613133     | 283.018478     | 310.150684     | 4.679E-80 | -3.011558 | down      | -                                                                            |
| c35813.graph_c0 | 6.53720099    | 6.71371446    | 7.74597284    | 779.052868     | 881.40725      | 962.388293     | 3.83E-244 | 5.942619  | up        | PREDICTED: cysteine proteinase C0144 [Sesamum indicum]                       |
| c35814.graph_c0 | 300.204405    | 299.751082    | 328.509247    | 204.635945     | 210.783827     | 202.61264      | 4.015E-27 | -1.605855 | down      | PREDICTED: thioredoxin H-type-like [Nelumbo nucifera]                        |
| c35828.graph_c0 | 0.04272613    | 0.06415337    | 0.08235716    | 1.08245776     | 1.16758243     | 1.47101473     | 3.867E-08 | 3.271261  | up        | PREDICTED: K(+) efflux antiporter 3, chloroplastic [Sesamum indicum]         |
| c35844.graph_c0 | 0.31564105    | 0.34755283    | 0.24336675    | 9.39248866     | 9.95020283     | 11.5916601     | 2.001E-29 | 4.07599   | up        | PREDICTED: uncharacterized protein LOC105173814 [Sesamum indicum]            |
| c35848.graph_c0 | 0             | 0             | 0             | 2.33747381     | 2.60660007     | 5.36387562     | 2.926E-05 | Inf       | up        | -                                                                            |
| c35849.graph_c0 | 0.25361014    | 0.2855971     | 0.04073738    | 14.2229689     | 13.829933      | 10.9663781     | 4.641E-39 | 5.069745  | up        | PREDICTED: cytochrome P450 78A5 [Sesamum indicum]                            |
| c35855.graph_c0 | 4.04441503    | 4.18969042    | 2.77991556    | 549.365265     | 577.487886     | 598.768288     | 2.26E-267 | 6.276905  | up        | PREDICTED: cysteine proteinase 3-like [Sesamum indicum]                      |
| c35856.graph_c0 | 12.7984981    | 13.56216      | 13.6753587    | 2.02991988     | 2.15045397     | 2.42109067     | 1.084E-49 | -3.620369 | down      | PREDICTED: probable methyltransferase PMT19 [Sesamum indicum]                |
| c35864.graph_c0 | 0.28652612    | 0.38241737    | 0.42956364    | 3.69553168     | 2.98283254     | 3.17082394     | 2.684E-05 | 2.14756   | up        | PREDICTED: ras-related protein RABA5a [Beta vulgaris subsp. vulgaris]        |
| c35874.graph_c0 | 11.9576837    | 12.2941362    | 10.3906289    | 6.48694803     | 7.31152967     | 7.38113472     | 1.008E-27 | -1.728026 | down      | hypothetical protein JCGZ_25649 [Jatropha curcas]                            |
| c35883.graph_c0 | 0.03389161    | 0             | 0             | 15.8925894     | 21.4339958     | 24.6983595     | 7.996E-47 | 9.835158  | up        | PREDICTED: uncharacterized protein LOC105165376 isoform X1 [Sesamum indicum] |
| c35884.graph_c0 | 8.8338195     | 8.07630092    | 6.50836981    | 1.08510543     | 0.63224569     | 0.57931217     | 3.67E-32  | -4.352603 | down      | -                                                                            |
| c35887.graph_c0 | 0             | 0.10880836    | 0.20952478    | 5.95839458     | 10.6087337     | 15.5488113     | 1.954E-08 | 5.609635  | up        | PREDICTED: putative UDP-rhamnose:rhamnosyltransferase 1 [Sesamum indicum]    |
| c35887.graph_c1 | 0             | 0             | 0             | 4.36578495     | 10.5714738     | 16.5375066     | 5.732E-06 | Inf       | up        | hypothetical protein MIMGU_mgv1a005472mg [Erythranthe guttata]               |
| c35890.graph_c1 | 134.996533    | 137.792093    | 139.724935    | 102.835524     | 100.778764     | 92.8480544     | 4.687E-26 | -1.493277 | down      | PREDICTED: probable protein suoum13 [Sesamum indicum]                        |
| c35891.graph_c0 | 34.6483865    | 33.3618214    | 36.8917687    | 401.892452     | 371.973185     | 386.274526     | 1.123E-44 | 2.450141  | up        | 40S ribosomal protein S6 [Morus notabilis]                                   |
| c35893.graph_c2 | 0             | 0.44824727    | 0             | 2.61276298     | 3.20494328     | 3.79312865     | 1.21E-07  | 3.411555  | up        | hypothetical protein M569_00198, partial [Genlisea aurea]                    |
| c35894.graph_c0 | 2.5366716     | 2.3040995     | 2.23351421    | 1.60124169     | 1.65047489     | 1.6943273      | 0.0002932 | -1.533486 | down      | PREDICTED: protein trichome birefringence-like 10 [Sesamum indicum]          |
| c35901.graph_c0 | 8.9690827     | 10.2983674    | 9.15270329    | 3.28085894     | 3.34694362     | 4.54111553     | 4.767E-09 | -2.367342 | down      | PREDICTED: uncharacterized protein LOC104435912 [Eucalyptus grandis]         |
| c35910.graph_c0 | 2.5865758     | 2.07133269    | 2.06078843    | 12.4388546     | 17.2165258     | 16.2839805     | 2.156E-09 | 1.752146  | up        | PREDICTED: exosome complex component RRP42 isoform X1 [Sesamum indicum]      |
| c35914.graph_c0 | 0.94110453    | 0.82429104    | 0.30233915    | 6.17742402     | 6.5442317      | 6.55738882     | 7.862E-05 | 2.211878  | up        | PREDICTED: GTP-binding protein OBGC, chloroplastic [Sesamum indicum]         |

| #ID             | 0 h-1<br>FPKM | 0 h-2<br>FPKM | 0 h-3<br>FPKM | 48 h-1<br>FPKM | 48 h-2<br>FPKM | 48 h-3<br>FPKM | FDR       | log2FC    | regulated | nr_annotation                                                                                     |
|-----------------|---------------|---------------|---------------|----------------|----------------|----------------|-----------|-----------|-----------|---------------------------------------------------------------------------------------------------|
| c35914.graph_c1 | 3.48304068    | 3.5666785     | 3.54980825    | 10.732897      | 19.0089475     | 20.6425852     | 0.0014428 | 1.221096  | up        | PREDICTED: uncharacterized protein LOC105163283 [Sesamum indicum]                                 |
| c35916.graph_c0 | 4.00907018    | 4.53090204    | 3.57303223    | 2.36795683     | 4.03894442     | 4.50552123     | 3.356E-08 | -1.176259 | down      | PREDICTED: pentatricopeptide repeat-containing protein At4g19440, chloroplastic [Sesamum indicum] |
| c35922.graph_c0 | 38.4544225    | 39.4585438    | 39.6112487    | 30.4580941     | 27.4737322     | 28.0000175     | 7.485E-23 | -1.467453 | down      | PREDICTED: protein DEHYDRATION-INDUCED 19 homolog 7-like [Sesamum indicum]                        |
| c35923.graph_c0 | 14.1166392    | 15.9854391    | 18.1404403    | 84.3710327     | 75.8618055     | 75.2898111     | 6.421E-14 | 1.26995   | up        | PREDICTED: uncharacterized protein At5g64816 [Sesamum indicum]                                    |
| c35927.graph_c0 | 9.13791663    | 7.92201327    | 9.43600552    | 92.3022343     | 97.783025      | 106.340926     | 5.935E-46 | 2.463763  | up        | PREDICTED: cytochrome b5-like [Sesamum indicum]                                                   |
| c35929.graph_c1 | 9.63998418    | 8.10569522    | 6.11129559    | 8.28891672     | 6.52310448     | 6.32179564     | 0.0015153 | -1.183087 | down      | -                                                                                                 |
| c35931.graph_c0 | 40.3877794    | 40.9242735    | 45.3195407    | 2.39682512     | 1.85397932     | 1.15097047     | 1.01E-187 | -5.560849 | down      | PREDICTED: 22.0 kDa heat shock protein-like [Sesamum indicum]                                     |
| c35933.graph_c0 | 4.42916949    | 3.81782621    | 3.95254039    | 0.62340053     | 0.5403414      | 0.55469804     | 4.007E-27 | -3.841754 | down      | hypothetical protein VITISV_009861 [Vitis vinifera]                                               |
| c35935.graph_c0 | 28.8407443    | 28.9535473    | 35.2838392    | 158.415751     | 168.804175     | 177.210439     | 5.067E-25 | 1.416885  | up        | hypothetical protein MIMGU_mgv1a007974mg [Erythranthe guttata]                                    |
| c35936.graph_c0 | 3.78240134    | 4.96411426    | 2.91632128    | 32.9874976     | 46.5950051     | 34.3129915     | 5.635E-14 | 2.269476  | up        | -                                                                                                 |
| c35937.graph_c0 | 5.09852834    | 3.60774109    | 3.5018299     | 19.4362629     | 27.5396115     | 23.8516804     | 4.609E-07 | 1.516471  | up        | hypothetical protein MIMGU_mgv1a016751mg [Erythranthe guttata]                                    |
| c35939.graph_c0 | 1.89737421    | 1.89927414    | 2.14266147    | 17.1620334     | 22.6141377     | 24.3670941     | 8.83E-18  | 2.408572  | up        | PREDICTED: uncharacterized protein LOC105156528 [Sesamum indicum]                                 |
| c35942.graph_c0 | 11.5174834    | 12.7009219    | 11.1409771    | 5.33447862     | 5.87769433     | 5.92242639     | 1.975E-44 | -2.063763 | down      | PREDICTED: putative uncharacterized protein At4g01020, chloroplastic [Sesamum indicum]            |
| c35944.graph_c0 | 0.68271918    | 0.77254232    | 0.83917678    | 0.19142426     | 0.23176091     | 0.26765854     | 1.744E-07 | -2.755519 | down      | PREDICTED: DNA-directed RNA polymerase III subunit RPC5 [Sesamum indicum]                         |
| c35947.graph_c0 | 0.06553171    | 0             | 0             | 4.40716191     | 4.28511225     | 4.67352817     | 5.543E-14 | 6.675886  | up        | PREDICTED: B3 domain-containing protein At3g19184 isoform X2 [Sesamum indicum]                    |
| c35957.graph_c0 | 0.01980486    | 0             | 0             | 1.35016936     | 1.70094573     | 1.99687605     | 6.044E-16 | 6.992184  | up        | PREDICTED: glutamate receptor 5.2-like [Sesamum indicum]                                          |
| c35958.graph_c0 | 14.1848823    | 14.036346     | 15.1988177    | 12.468931      | 11.54328       | 13.0272039     | 1.077E-11 | -1.246997 | down      | PREDICTED: uncharacterized protein LOC105160232 [Sesamum indicum]                                 |
| c35959.graph_c0 | 0             | 0.04814732    | 0             | 1.41798666     | 1.36135509     | 1.65600226     | 4.067E-10 | 5.518924  | up        | PREDICTED: membrane steroid-binding protein 2-like [Sesamum indicum]                              |
| c35961.graph_c0 | 1.61313137    | 0             | 1.81382047    | 7.05907872     | 10.8237654     | 12.231666      | 6.674E-05 | 2.102273  | up        | -                                                                                                 |
| c35962.graph_c0 | 10.1818575    | 13.019906     | 10.1344975    | 783.598403     | 663.205925     | 639.1538       | 3.999E-62 | 4.954722  | up        | PREDICTED: (-)-isopiperitenol/(-)-carveol dehydrogenase, mitochondrial-like [Sesamum indicum]     |
| c35963.graph_c0 | 1.65706473    | 1.90576803    | 2.03878128    | 528.91683      | 686.330599     | 800.649729     | 7.063E-74 | 7.466355  | up        | tubulin alpha chain-like [Sesamum indicum]                                                        |
| c35970.graph_c0 | 0             | 0.28523274    | 0.13731326    | 1.05004855     | 1.87717351     | 3.53292355     | 0.0085039 | 2.900696  | up        | PREDICTED: cytochrome P450 81D1-like [Sesamum indicum]                                            |

| #ID             | 0 h-1<br>FPKM | 0 h-2<br>FPKM | 0 h-3<br>FPKM | 48 h-1<br>FPKM | 48 h-2<br>FPKM | 48 h-3<br>FPKM | FDR       | log2FC    | regulated | nr_annotation                                                                              |
|-----------------|---------------|---------------|---------------|----------------|----------------|----------------|-----------|-----------|-----------|--------------------------------------------------------------------------------------------|
| c35979.graph_c0 | 1.77228675    | 2.17956118    | 1.43154543    | 25.9373388     | 24.2651718     | 23.493976      | 2.647E-26 | 2.762118  | up        | PREDICTED: uncharacterized protein LOC105171592 [Sesamum indicum]                          |
| c35981.graph_c0 | 3.44506121    | 2.73278224    | 3.92586571    | 23.2347218     | 22.5208801     | 19.5551559     | 4.888E-10 | 1.674334  | up        | PREDICTED: uncharacterized protein LOC105169411 [Sesamum indicum]                          |
| c35982.graph_c0 | 8.87077623    | 10.191001     | 7.59953244    | 4.13789248     | 5.29684437     | 7.17965011     | 2.4E-14   | -1.704301 | down      | PREDICTED: uncharacterized protein LOC105177291 [Sesamum indicum]                          |
| c35983.graph_c0 | 0.16718133    | 0.35860443    | 0.49105057    | 1.25414935     | 1.95796509     | 1.85989092     | 0.0045379 | 1.285177  | up        | PREDICTED: uncharacterized mitochondrial protein ymf11 [Sesamum indicum]                   |
| c35991.graph_c2 | 4.9122176     | 4.19074129    | 4.23217332    | 53.7912068     | 56.222552      | 62.734512      | 5.335E-47 | 2.677298  | up        | PREDICTED: ribonuclease 2 [Sesamum indicum]                                                |
| c35992.graph_c0 | 0.06156216    | 0.04108253    | 0.07910981    | 2.96808884     | 4.06559896     | 4.4072532      | 3.644E-22 | 4.947892  | up        | PREDICTED: putative leucine-rich repeat-containing protein DDB_G0290503 [Sesamum indicum]  |
| c35995.graph_c0 | 0             | 0.0522414     | 0             | 26.8286626     | 34.5593792     | 37.5192273     | 1.718E-89 | 9.875692  | up        | PREDICTED: LOW QUALITY PROTEIN: interactor of constitutive active ROPs 3 [Sesamum indicum] |
| c35996.graph_c0 | 0             | 0.05325416    | 0.03418262    | 0.72292885     | 1.16825408     | 1.18839142     | 3.502E-11 | 4.106621  | up        | hypothetical protein VITISV_035665 [Vitis vinifera]                                        |
| c36002.graph_c0 | 17.2559374    | 14.8549662    | 16.4978746    | 12.018355      | 9.02691344     | 11.2030915     | 8.218E-13 | -1.605645 | down      | PREDICTED: uncharacterized protein LOC105166164 [Sesamum indicum]                          |
| c36012.graph_c0 | 4.00026863    | 3.66105078    | 4.40614591    | 0              | 0              | 0.09369044     | 2.099E-21 | -8.051321 | down      | -                                                                                          |
| c36015.graph_c0 | 21.7776219    | 20.9819504    | 22.3880851    | 12.1004762     | 13.6160228     | 10.7111438     | 1.076E-20 | -1.857108 | down      | PREDICTED: uncharacterized protein LOC105158384 [Sesamum indicum]                          |
| c36017.graph_c0 | 0.02231164    | 0.02233398    | 0             | 2.28159795     | 2.41707637     | 2.52397292     | 1.376E-17 | 6.335505  | up        | PREDICTED: potassium channel AK123 [Sesamum indicum]                                       |
| c36019.graph_c0 | 2.69984528    | 2.73192429    | 3.58254094    | 0.72996072     | 0.88786856     | 0.84196345     | 9.703E-15 | -2.897567 | down      | PREDICTED: F-box protein SKIP14 [Sesamum indicum]                                          |
| c36022.graph_c0 | 34.8079776    | 35.6322684    | 37.4512756    | 14.9933988     | 17.5280345     | 16.9260722     | 1.475E-45 | -2.146443 | down      | PREDICTED: protein trichome birefringence-like 39 [Sesamum indicum]                        |
| c36025.graph_c0 | 9.97672382    | 10.7549228    | 7.53091433    | 5.01338657     | 7.01334285     | 6.40536792     | 9.808E-09 | -1.636482 | down      | -                                                                                          |
| c36034.graph_c0 | 13.969574     | 15.3585152    | 13.9330335    | 4.90017207     | 6.61727498     | 5.89338097     | 6.897E-40 | -2.334879 | down      | hypothetical protein MIMGU_mgv1a022687mg [Erythranthe guttata]                             |
| c36037.graph_c0 | 74.9731039    | 74.7315191    | 79.5513232    | 59.1837389     | 44.5773244     | 32.5941747     | 1.705E-27 | -1.759412 | down      | PREDICTED: ethylene-responsive transcription factor ERF107-like [Sesamum indicum]          |
| c36038.graph_c0 | 0.07158681    | 0.10748774    | 0.04599594    | 0.72545482     | 1.57199607     | 1.76046909     | 0.000112  | 3.14719   | up        | PREDICTED: endoglucanase 10-like [Sesamum indicum]                                         |
| c36039.graph_c0 | 2.89349168    | 4.16355929    | 4.76400956    | 2.08255724     | 3.97119037     | 2.29777816     | 0.0007187 | -1.531119 | down      | floricaula, partial [Salvia coccinea]                                                      |
| c36040.graph_c0 | 7.34374668    | 8.10291741    | 7.7211861     | 1.53762237     | 0.81446223     | 1.84702564     | 7.624E-18 | -3.477242 | down      | CYP72A52v1 [Nicotiana tabacum]                                                             |
| c36046.graph_c0 | 7.99675015    | 5.56852709    | 9.82935183    | 2.80271167     | 4.41128357     | 6.91148832     | 0.0003821 | -1.759854 | down      | PREDICTED: uncharacterized protein LOC105174651 [Sesamum indicum]                          |
| c36056.graph_c0 | 3.89290927    | 3.89680743    | 5.40504595    | 28.0728703     | 30.0018267     | 28.4636699     | 7.487E-18 | 1.691326  | up        | PREDICTED: uncharacterized protein At2g34160-like [Sesamum indicum]                        |
| c36060.graph_c0 | 1.97267571    | 1.97465104    | 2.18531585    | 11.0921477     | 21.9082441     | 24.4791517     | 7.484E-05 | 2.197876  | up        | PREDICTED: laccase-14-like [Sesamum indicum]                                               |

| #ID             | 0 h-1<br>FPKM | 0 h-2<br>FPKM | 0 h-3<br>FPKM | 48 h-1<br>FPKM | 48 h-2<br>FPKM | 48 h-3<br>FPKM | FDR       | log2FC    | regulated | nr_annotation                                                                               |
|-----------------|---------------|---------------|---------------|----------------|----------------|----------------|-----------|-----------|-----------|---------------------------------------------------------------------------------------------|
| c36076.graph_c0 | 0.08161367    | 0.49017238    | 0.83901441    | 18.1202693     | 17.5235277     | 20.338113      | 2.281E-23 | 4.278246  | up        | PREDICTED: uncharacterized protein LOC105165595 [Sesamum indicum]                           |
| c36082.graph_c0 | 17.7215771    | 17.257712     | 17.7237269    | 10.4409346     | 15.4957007     | 16.1046142     | 9.714E-18 | -1.350952 | down      | PREDICTED: uncharacterized membrane protein At1g75140-like [Sesamum indicum]                |
| c36085.graph_c0 | 0.53327678    | 0.86744252    | 0.770942      | 11.1768329     | 8.84784552     | 8.08720683     | 1.194E-09 | 2.680542  | up        | PREDICTED: putative receptor-like protein kinase At1g72540 [Sesamum indicum]                |
| c36087.graph_c0 | 13.8644332    | 14.5545902    | 13.5887381    | 13.6658351     | 13.0438997     | 11.317021      | 1.681E-12 | -1.15864  | down      | PREDICTED: uncharacterized protein LOC105173071 [Sesamum indicum]                           |
| c36088.graph_c0 | 34.1609475    | 35.2392814    | 31.5664703    | 17.4413425     | 17.0008646     | 16.4597594     | 1.37E-35  | -2.003781 | down      | PREDICTED: uncharacterized protein LOC105178899 isoform X2 [Sesamum indicum]                |
| c36103.graph_c0 | 0.75736568    | 0.86642751    | 0.55613993    | 8.57216873     | 10.3483138     | 14.8114712     | 2.352E-09 | 2.931802  | up        | PREDICTED: proliferating cell nuclear antigen [Sesamum indicum]                             |
| c36106.graph_c0 | 7.29621738    | 4.97967507    | 4.04869627    | 0              | 0              | 0              | 8.188E-19 | -Inf      | down      | -                                                                                           |
| c36109.graph_c0 | 13.2016679    | 12.6791487    | 13.5258823    | 56.4968804     | 59.633952      | 58.0213946     | 3.148E-13 | 1.125165  | up        | hypothetical protein MIMGU_mgv1a016596mg [Erythranthe guttata]                              |
| c36119.graph_c0 | 0.36667573    | 0.3670429     | 0.34554141    | 5.35984888     | 8.89888664     | 11.2415945     | 1.067E-08 | 3.53538   | up        | PREDICTED: uncharacterized protein LOC105159055 [Sesamum indicum]                           |
| c36121.graph_c0 | 18.155595     | 17.5135423    | 15.7024699    | 16.5342317     | 18.1597356     | 15.764954      | 7.824E-11 | -1.042625 | down      | PREDICTED: ATPase family AAA domain-containing protein 1 [Sesamum indicum]                  |
| c36125.graph_c0 | 5.31800136    | 4.47159429    | 5.74042753    | 26.7501219     | 29.2727471     | 28.5537984     | 8.094E-12 | 1.424721  | up        | PREDICTED: protein OS-9 homolog [Sesamum indicum]                                           |
| c36141.graph_c0 | 9.28059381    | 7.1264886     | 7.02486316    | 0.81985231     | 1.73706821     | 0.83371389     | 4.519E-16 | -3.813751 | down      | ubiquitin extension protein [Capsicum annum]                                                |
| c36144.graph_c0 | 11.3751387    | 11.1967537    | 11.9863529    | 0.38424906     | 0.8511365      | 0.74596909     | 7.222E-81 | -5.15506  | down      | PREDICTED: type I inositol 1,4,5-trisphosphate 5-phosphatase CVP2 isoform X1 [Cucumis melo] |
| c36150.graph_c0 | 1.48202465    | 0.52493384    | 0.70318536    | 0              | 0              | 0              | 5.79E-08  | -Inf      | down      | hypothetical protein EMIHUDDRAFT_239943 [Emiliania huxleyi CCMP1516]                        |
| c36151.graph_c0 | 87.0632639    | 84.1047475    | 82.7228639    | 80.8090191     | 88.873842      | 80.9536559     | 1.271E-13 | -1.036738 | down      | hypothetical protein MIMGU_mgv1a022801mg, partial [Erythranthe guttata]                     |
| c36157.graph_c0 | 1.30711437    | 1.49099394    | 1.87500695    | 7.5052404      | 11.6593306     | 14.7516631     | 4.436E-05 | 1.8293    | up        | PREDICTED: katanin p60 ATPase-containing subunit A-like 2 isoform X1 [Sesamum indicum]      |
| c36159.graph_c0 | 6.2124685     | 6.70452445    | 4.36584968    | 4.56077954     | 4.35790732     | 5.64958723     | 0.0010815 | -1.261338 | down      | PREDICTED: uncharacterized protein LOC105167009 [Sesamum indicum]                           |
| c36162.graph_c0 | 560.709512    | 561.688486    | 606.77246     | 137.818225     | 148.240571     | 152.033634     | 9.183E-70 | -3.000641 | down      | hypothetical protein MIMGU_mgv1a009201mg [Erythranthe guttata]                              |
| c36172.graph_c0 | 17.8985072    | 18.2125692    | 20.3390998    | 284.678428     | 242.103148     | 211.229094     | 1.611E-18 | 2.694151  | up        | -                                                                                           |
| c36188.graph_c0 | 1.74423702    | 2.13793912    | 1.23506465    | 0.95102536     | 0.69482486     | 0.17507931     | 2.864E-08 | -2.489179 | down      | PREDICTED: WEB family protein At1g12150-like [Sesamum indicum]                              |
| c36190.graph_c0 | 0.0931565     | 0.09324978    | 0.17956468    | 71.4466825     | 115.147437     | 131.498391     | 1.107E-34 | 8.729144  | up        | unnamed protein product [Coffea canephora]                                                  |

| #ID             | 0 h-1<br>FPKM | 0 h-2<br>FPKM | 0 h-3<br>FPKM | 48 h-1<br>FPKM | 48 h-2<br>FPKM | 48 h-3<br>FPKM | FDR       | log2FC    | regulated | nr_annotation                                                                                           |
|-----------------|---------------|---------------|---------------|----------------|----------------|----------------|-----------|-----------|-----------|---------------------------------------------------------------------------------------------------------|
| c36193.graph_c0 | 1.73641286    | 2.15199724    | 0.95629683    | 72.5576756     | 71.7416553     | 75.6096831     | 4.23E-123 | 4.49304   | up        | PREDICTED: GDSL esterase/lipase At1g54790 [Sesamum indicum]                                             |
| c36202.graph_c0 | 0             | 0.20102967    | 0.12903634    | 10.7309502     | 8.62410661     | 8.06669677     | 9.237E-15 | 5.358229  | up        | PREDICTED: NAC domain-containing protein 8-like [Sesamum indicum]                                       |
| c36202.graph_c1 | 0.21770556    | 0             | 0             | 8.02258234     | 8.71142703     | 6.15690926     | 3.61E-13  | 5.720993  | up        | PREDICTED: NAC domain-containing protein 8-like [Sesamum indicum]                                       |
| c36206.graph_c0 | 80.255123     | 77.7708505    | 80.5293913    | 44.5276146     | 43.7249722     | 38.7689623     | 2.45E-39  | -1.925548 | down      | PREDICTED: early nodulin-93-like [Solanum tuberosum]                                                    |
| c36209.graph_c0 | 19.0339883    | 17.5515849    | 17.9457763    | 16.9635465     | 16.1535466     | 17.3836104     | 4.264E-10 | -1.127492 | down      | PREDICTED: uncharacterized protein LOC101497815 [Cicer arietinum]                                       |
| c36211.graph_c0 | 210.783866    | 241.942607    | 201.227282    | 76.7981351     | 41.723304      | 33.6482177     | 5.208E-65 | -3.105308 | down      | PREDICTED: probable WRKY transcription factor 17 [Sesamum indicum]                                      |
| c36215.graph_c0 | 14.2416674    | 14.7663707    | 11.6546688    | 2.01335339     | 2.09735539     | 1.64218059     | 1.113E-69 | -3.835531 | down      | PREDICTED: phosphoenolpyruvate carboxylase kinase 2 [Sesamum indicum]                                   |
| c36217.graph_c0 | 0.09024243    | 0.0451664     | 0             | 1.78745        | 1.36514378     | 1.07263734     | 1.904E-07 | 3.971727  | up        | hypothetical protein MIMGU_mgv1a009127mg [Erythranthe guttata]                                          |
| c36224.graph_c0 | 0.37891494    | 0             | 0.24346035    | 5.06167682     | 5.732042       | 4.03793412     | 1.278E-07 | 3.557412  | up        | PREDICTED: laccase-1-like [Sesamum indicum]                                                             |
| c36224.graph_c1 | 0.1869554     | 0             | 0.12012254    | 3.01412132     | 4.15102488     | 4.21448819     | 1.292E-11 | 4.188381  | up        | PREDICTED: laccase-1-like [Sesamum indicum]                                                             |
| c36234.graph_c0 | 12.293973     | 11.5528376    | 12.574111     | 3.52493161     | 2.69354845     | 2.416619       | 3.027E-28 | -3.088048 | down      | PREDICTED: high mobility group B protein 6 [Sesamum indicum]                                            |
| c36238.graph_c0 | 3.63785479    | 3.9289842     | 2.89098696    | 31.7944788     | 33.682395      | 32.0181379     | 5.113E-26 | 2.205271  | up        | PREDICTED: probable UDP-arabinopyranose mutase 5 isoform X1 [Sesamum indicum]                           |
| c36244.graph_c0 | 0.11539944    | 0.13861799    | 0.17795141    | 4.93294579     | 5.36100942     | 5.01364637     | 1.631E-21 | 4.124546  | up        | PREDICTED: uncharacterized protein LOC105158603 isoform X1 [Sesamum indicum]                            |
| c36245.graph_c0 | 0             | 0             | 0             | 5.90116167     | 7.40185324     | 9.82953161     | 1.209E-22 | Inf       | up        | -                                                                                                       |
| c36254.graph_c1 | 0.55944952    | 0.33600583    | 0             | 1.90698512     | 1.74721687     | 1.6968239      | 0.0082841 | 1.581357  | up        | PREDICTED: pentatricopeptide repeat-containing protein DOT4, chloroplastic isoform X1 [Sesamum indicum] |
| c36255.graph_c0 | 0.06113172    | 0.06119294    | 0             | 2.96610923     | 2.30695593     | 1.72050819     | 4.981E-11 | 4.843739  | up        | hypothetical protein MIMGU_mgv1a018451mg [Erythranthe guttata]                                          |
| c36264.graph_c0 | 4.88198056    | 6.14799665    | 7.08302712    | 27.5659289     | 26.66673       | 22.8497663     | 2.089E-05 | 1.070625  | up        | -                                                                                                       |
| c36267.graph_c0 | 0.03976429    | 0.19902054    | 0.15329606    | 1.90493983     | 3.02707915     | 4.33529871     | 4.582E-06 | 3.530384  | up        | PREDICTED: transcription factor bHLH30-like isoform X2 [Sesamum indicum]                                |
| c36268.graph_c0 | 0             | 0             | 0             | 10.702059      | 10.1370891     | 7.28200945     | 2.727E-15 | Inf       | up        | -                                                                                                       |
| c36275.graph_c0 | 17.0330058    | 17.3390459    | 17.3744418    | 139.89742      | 140.643865     | 146.173146     | 5.44E-45  | 2.025773  | up        | PREDICTED: gamma carbonic anhydrase 2, mitochondrial [Sesamum indicum]                                  |
| c36277.graph_c0 | 17.281138     | 20.282027     | 14.3020885    | 12.6487733     | 8.72691763     | 7.14796922     | 3.892E-12 | -1.8682   | down      | PREDICTED: ethylene-responsive transcription factor ABR1-like [Sesamum indicum]                         |
| c36280.graph_c0 | 7.91456347    | 7.64929945    | 10.0536248    | 42.3237139     | 49.2761343     | 43.3269373     | 1.095E-10 | 1.374731  | up        | -                                                                                                       |



| #ID             | 0 h-1<br>FPKM | 0 h-2<br>FPKM | 0 h-3<br>FPKM | 48 h-1<br>FPKM | 48 h-2<br>FPKM | 48 h-3<br>FPKM | FDR       | log2FC    | regulated | nr_annotation                                                                                 |
|-----------------|---------------|---------------|---------------|----------------|----------------|----------------|-----------|-----------|-----------|-----------------------------------------------------------------------------------------------|
| c36282.graph_c0 | 32.0829521    | 32.858483     | 32.4478557    | 190.204177     | 200.33856      | 220.258808     | 6.221E-25 | 1.629699  | up        | hypothetical protein M569_11398, partial [Genlisea aurea]                                     |
| c36287.graph_c0 | 2.86635903    | 2.15192194    | 3.03879249    | 1.1883046      | 1.85332849     | 1.67413162     | 3.459E-06 | -1.799255 | down      | PREDICTED: glutamate decarboxylase-like [Sesamum indicum]                                     |
| c36289.graph_c0 | 5.40734069    | 4.31506368    | 4.61623394    | 1.81148907     | 2.02976761     | 3.13071269     | 6.151E-11 | -2.062271 | down      | PREDICTED: transcription factor GAMYB-like [Sesamum indicum]                                  |
| c36291.graph_c0 | 9.35718559    | 8.34845155    | 7.49343797    | 42.8523804     | 53.2056972     | 56.9723544     | 3.449E-17 | 1.582405  | up        | PREDICTED: 50S ribosomal protein L27, chloroplastic-like [Sesamum indicum]                    |
| c36295.graph_c0 | 0.44881411    | 0.39934536    | 0.83307452    | 4.68607075     | 5.9863904      | 5.43688037     | 6.851E-07 | 2.231164  | up        | PREDICTED: uncharacterized protein LOC105171863 [Sesamum indicum]                             |
| c36303.graph_c0 | 4.8731903     | 3.67994759    | 3.07618929    | 17.0916082     | 17.9396063     | 17.450666      | 0.0004945 | 1.159792  | up        | hypothetical protein MIMGU_mgv1a014569mg [Erythranthe guttata]                                |
| c36304.graph_c0 | 0.34367535    | 0.11467316    | 0.36803036    | 2.53292922     | 2.5715259      | 3.61544708     | 1.474E-05 | 2.374787  | up        | PREDICTED: E3 ubiquitin-protein ligase RNF5-like [Sesamum indicum]                            |
| c36310.graph_c1 | 0.07390919    | 0.14796641    | 0.18995248    | 8.17079641     | 5.33784695     | 7.99735806     | 4.727E-14 | 4.686791  | up        | PREDICTED: histone H3-like centromeric protein HTR12 [Sesamum indicum]                        |
| c36317.graph_c0 | 22.8430936    | 25.3102606    | 21.2565474    | 17.1259079     | 12.4539715     | 12.1391678     | 5.497E-18 | -1.744006 | down      | PREDICTED: zinc finger CCCH domain-containing protein 44-like isoform X3 [Sesamum indicum]    |
| c36318.graph_c0 | 8.95597731    | 10.0274574    | 9.420154      | 48.4354306     | 56.8149036     | 60.4997222     | 6.538E-24 | 1.523889  | up        | PREDICTED: 3-oxoacyl-[acyl-carrier-protein] synthase I, chloroplastic [Sesamum indicum]       |
| c36321.graph_c0 | 0.42772549    | 0.58384608    | 0.34977358    | 2.05979961     | 2.61852951     | 2.47029202     | 0.0009899 | 1.374363  | up        | PREDICTED: putative receptor protein kinase ZmPK1 [Sesamum indicum]                           |
| c36336.graph_c0 | 6.33676463    | 3.41552074    | 4.38468877    | 0              | 0              | 0              | 3.394E-20 | -Inf      | down      | hypothetical protein EMIHUDDRAFT_109093 [Emiliania huxleyi CCMP1516]                          |
| c36337.graph_c0 | 0.64222967    | 0.61492178    | 0.68176176    | 0.4887658      | 0.19076404     | 0.20600567     | 2.535E-05 | -2.12981  | down      | -                                                                                             |
| c36340.graph_c0 | 2.91235034    | 3.44531509    | 3.74248549    | 1.21956686     | 2.32556977     | 1.88094965     | 4.815E-05 | -1.925878 | down      | PREDICTED: putative DNA-binding protein ESCAROLA [Sesamum indicum]                            |
| c36343.graph_c0 | 1.93851606    | 2.04826037    | 1.52232049    | 0.39686388     | 0.63064373     | 0.44140886     | 5.064E-09 | -2.928044 | down      | PREDICTED: brefeldin A-inhibited guanine nucleotide-exchange protein 1-like [Sesamum indicum] |
| c36346.graph_c0 | 3.5450544     | 3.9775564     | 2.50304135    | 25.8403675     | 25.5877742     | 26.7927701     | 2.778E-21 | 1.95019   | up        | PREDICTED: xylosyltransferase 1 [Sesamum indicum]                                             |
| c36353.graph_c0 | 0.06760162    | 0.03383466    | 0.04343538    | 4.42181076     | 6.26782212     | 5.68008892     | 3.926E-22 | 5.799716  | up        | hypothetical protein MIMGU_mgv1a004476mg [Erythranthe guttata]                                |
| c36357.graph_c0 | 0             | 0             | 0             | 7.63511541     | 5.69870109     | 4.78645621     | 9.872E-11 | Inf       | up        | -                                                                                             |
| c36361.graph_c0 | 17.2751067    | 19.5704465    | 15.6856595    | 72.903836      | 98.5348857     | 93.700237      | 9.114E-14 | 1.314378  | up        | PREDICTED: protein NIM1-INTERACTING 1 [Sesamum indicum]                                       |
| c36365.graph_c0 | 42.4170837    | 38.7494995    | 35.1036205    | 11.6346904     | 16.7466627     | 17.3291473     | 2.133E-27 | -2.369424 | down      | unnamed protein product [Vitis vinifera]                                                      |
| c36372.graph_c0 | 0.55630159    | 0.87506358    | 0.20424845    | 14.0571787     | 17.9167887     | 18.3059691     | 4.16E-19  | 3.929369  | up        | PREDICTED: uncharacterized protein LOC105168457 [Sesamum indicum]                             |
| c36375.graph_c0 | 0.82387237    | 0.55788351    | 0.52935431    | 2.63419371     | 3.99671941     | 4.62818902     | 6.462E-05 | 1.536258  | up        | PREDICTED: oligopeptide transporter 1 [Sesamum indicum]                                       |

| #ID             | 0 h-1<br>FPKM | 0 h-2<br>FPKM | 0 h-3<br>FPKM | 48 h-1<br>FPKM | 48 h-2<br>FPKM | 48 h-3<br>FPKM | FDR       | log2FC    | regulated | nr_annotation                                                                |
|-----------------|---------------|---------------|---------------|----------------|----------------|----------------|-----------|-----------|-----------|------------------------------------------------------------------------------|
| c36376.graph_c0 | 0.23981899    | 0.28807096    | 0.18490614    | 3.93267678     | 2.66823673     | 3.61722515     | 2.937E-07 | 2.832437  | up        | hypothetical protein CICLE_v10011295mg [Citrus clamentina]                   |
| c36380.graph_c0 | 0.35686282    | 0.17861008    | 0.34393714    | 10.7670637     | 11.203231      | 13.9197138     | 3.223E-38 | 4.329139  | up        | PREDICTED: uncharacterized protein LOC105162690 isoform X1 [Sesamum indicum] |
| c36386.graph_c0 | 44.502157     | 45.4816503    | 45.0436141    | 28.3951117     | 28.0435936     | 26.3466895     | 1.289E-29 | -1.722541 | down      | PREDICTED: uncharacterized protein LOC105179031 [Sesamum indicum]            |
| c36388.graph_c0 | 0.14188673    | 0.0355072     | 0.22791257    | 1.69929898     | 2.38872854     | 2.47158098     | 1.126E-07 | 2.982701  | up        | PREDICTED: uncharacterized protein LOC105178674 isoform X1 [Sesamum indicum] |
| c36389.graph_c0 | 0.32045128    | 0             | 0.20589629    | 9.15183926     | 17.2012748     | 13.2656194     | 3.232E-12 | 5.207111  | up        | -                                                                            |
| c36389.graph_c1 | 0.30790509    | 0.13698374    | 0.30774351    | 4.47555993     | 6.47756855     | 6.33806864     | 7.218E-15 | 3.495332  | up        | PREDICTED: transcription factor MYB3-like [Sesamum indicum]                  |
| c36392.graph_c0 | 20.5208776    | 19.7855017    | 22.4040711    | 265.307606     | 274.267831     | 281.689583     | 6.214E-77 | 2.691689  | up        | PREDICTED: aspartic proteinase-like isoform X1 [Sesamum indicum]             |
| c36394.graph_c0 | 0.15836895    | 0.07926377    | 0.10175519    | 17.1432278     | 20.4796185     | 17.3310734     | 1.313E-30 | 6.322287  | up        | PREDICTED: auxin-induced protein 15A-like [Sesamum indicum]                  |
| c36395.graph_c0 | 5.75674353    | 5.06954821    | 5.80574542    | 5.77341691     | 3.6981887      | 3.67366077     | 4.879E-07 | -1.348209 | down      | PREDICTED: uncharacterized protein LOC105174263 [Sesamum indicum]            |
| c36397.graph_c0 | 0.3102294     | 0.31054005    | 0.33221422    | 3.42964274     | 4.54161327     | 4.83181952     | 1.761E-07 | 2.724134  | up        | PREDICTED: RING-H2 finger protein ATL38-like [Sesamum indicum]               |
| c36398.graph_c0 | 3.81032755    | 4.10753863    | 4.1431261     | 2.6327417      | 0.78666094     | 0.54059948     | 3.519E-09 | -2.596503 | down      | hypothetical protein MIMGU_mgv1a020815mg [Erythranthe guttata]               |
| c36402.graph_c2 | 0             | 0.08073063    | 0.10363828    | 1.70889823     | 1.18067639     | 1.52056737     | 6.489E-08 | 3.554638  | up        | hypothetical protein MIMGU_mgv1a000547mg [Erythranthe guttata]               |
| c36403.graph_c0 | 0.43806562    | 0.24556239    | 0.29272447    | 1.32372476     | 1.98377806     | 1.85294708     | 0.001848  | 1.380326  | up        | hypothetical protein MIMGU_mgv1a000577mg [Erythranthe guttata]               |
| c36405.graph_c0 | 14.2342176    | 13.5487693    | 14.8618707    | 212.040445     | 256.198575     | 250.555998     | 7.219E-94 | 3.053656  | up        | cyclophilin [Ricinus communis]                                               |
| c36419.graph_c0 | 0.19928369    | 0.26597765    | 0.17072495    | 1.89712902     | 1.75045194     | 1.30688051     | 0.0006772 | 1.950746  | up        | PREDICTED: AP-4 complex subunit epsilon [Sesamum indicum]                    |
| c36420.graph_c0 | 0.35493163    | 0.25839058    | 0.49756494    | 2.11054709     | 1.7949932      | 2.64500297     | 0.0011901 | 1.537058  | up        | PREDICTED: DNA polymerase epsilon subunit 2 isoform X1 [Sesamum indicum]     |
| c36426.graph_c0 | 20.3023279    | 21.0407728    | 25.167412     | 135.619281     | 156.134975     | 151.782448     | 8.356E-32 | 1.715251  | up        | -                                                                            |
| c36427.graph_c1 | 14.2841077    | 14.5932236    | 14.3817416    | 14.6065391     | 13.6054966     | 12.8358595     | 1.229E-08 | -1.091244 | down      | PREDICTED: uncharacterized protein LOC105169363 [Sesamum indicum]            |
| c36428.graph_c0 | 10.021112     | 6.88412024    | 10.9837719    | 6.69779949     | 6.99962119     | 7.16770125     | 3.262E-05 | -1.439487 | down      | -                                                                            |
| c36433.graph_c0 | 36.2507744    | 34.6861738    | 32.761706     | 8.89805015     | 8.6612749      | 6.60642825     | 3.279E-90 | -3.115299 | down      | PREDICTED: uncharacterized protein At5g19025-like [Sesamum indicum]          |
| c36438.graph_c0 | 3.44900567    | 3.10431217    | 3.87343966    | 2.96383897     | 2.63066671     | 2.63720609     | 8.267E-06 | -1.357823 | down      | PREDICTED: uncharacterized protein LOC105171186 [Sesamum indicum]            |
| c36443.graph_c0 | 0.58104785    | 1.2974816     | 0.68923338    | 14.2471936     | 13.7408954     | 15.2051528     | 6.228E-21 | 3.05657   | up        | PREDICTED: (S)-ureidoglycine aminohydrolase [Sesamum indicum]                |

| #ID             | 0 h-1<br>FPKM | 0 h-2<br>FPKM | 0 h-3<br>FPKM | 48 h-1<br>FPKM | 48 h-2<br>FPKM | 48 h-3<br>FPKM | FDR       | log2FC    | regulated | nr_annotation                                                                                                  |
|-----------------|---------------|---------------|---------------|----------------|----------------|----------------|-----------|-----------|-----------|----------------------------------------------------------------------------------------------------------------|
| c36444.graph_c0 | 2.20677469    | 2.65078133    | 3.48397407    | 0.11617284     | 0.30767761     | 0.51684949     | 1.8E-14   | -4.187443 | down      | M protein repeat-containing [Populus trichocarpa]<br>PREDICTED: LOW QUALITY PROTEIN: protein LOW               |
| c36448.graph_c0 | 6.74594766    | 6.15246247    | 4.2380848     | 4.74166756     | 5.94983555     | 5.32508686     | 0.0001033 | -1.114003 | down      | PSII ACCUMULATION 2, chloroplastic [Sesamum indicum]                                                           |
| c36451.graph_c0 | 780.803198    | 806.213247    | 747.287511    | 17.0660764     | 17.1315845     | 12.6789818     | 1.28E-246 | -6.652667 | down      | hypothetical protein MIMGU_mgv1a024078mg [Erythranthe guttata]                                                 |
| c36459.graph_c0 | 28.1867476    | 34.7984659    | 27.3304562    | 241.930265     | 262.547914     | 289.171323     | 4.812E-50 | 2.116909  | up        | PREDICTED: shikimate O-hydroxycinnamoyltransferase [Sesamum indicum]                                           |
| c36463.graph_c0 | 0.7417568     | 0.49499971    | 0.95318686    | 4.78348322     | 5.91210719     | 6.68849438     | 0.0002311 | 1.962089  | up        | PREDICTED: leucine-rich repeat receptor-like serine/threonine/tyrosine-protein kinase SOBIR1 [Sesamum indicum] |
| c36463.graph_c1 | 0.56335408    | 0.77538751    | 0.40721191    | 8.14178927     | 7.01015399     | 8.39901953     | 2.827E-13 | 2.742063  | up        | PREDICTED: leucine-rich repeat receptor-like serine/threonine/tyrosine-protein kinase SOBIR1 [Sesamum indicum] |
| c36466.graph_c0 | 36.5167621    | 37.0914858    | 32.2048062    | 152.435032     | 144.91803      | 142.059914     | 5.443E-13 | 1.039193  | up        | hypothetical protein MIMGU_mgv1a002222mg [Erythranthe guttata]                                                 |
| c36477.graph_c0 | 18.8265878    | 18.5641646    | 16.9034423    | 9.30313561     | 8.86141967     | 7.39969965     | 1.584E-45 | -2.100643 | down      | PREDICTED: uncharacterized protein LOC105159352 [Sesamum indicum]                                              |
| c36479.graph_c0 | 6.2517644     | 7.10045098    | 4.37737183    | 7.90089802     | 5.04549346     | 3.67934212     | 0.0026449 | -1.094262 | down      | PREDICTED: UDP-glycosyltransferase 14B1 [Vitis vinifera]                                                       |
| c36480.graph_c0 | 2.50489207    | 2.10127212    | 1.81345661    | 20.9802952     | 20.0396248     | 21.1986785     | 9.508E-39 | 2.262621  | up        | PREDICTED: methionine S-methyltransferase-like isoform X1 [Sesamum indicum]                                    |
| c36483.graph_c0 | 2.3160295     | 1.86963601    | 2.35214985    | 10.8748721     | 13.0518285     | 14.5145937     | 5.166E-09 | 1.533198  | up        | PREDICTED: triose phosphate/phosphate translocator, chloroplastic isoform X2 [Sesamum indicum]                 |
| c36491.graph_c0 | 0.25380118    | 0.10162213    | 0.26091565    | 232.555579     | 269.499807     | 287.982846     | 1.77E-296 | 9.300048  | up        | acetylajmalan acetylerase [Striga asiatica]                                                                    |
| c36492.graph_c0 | 3.93749026    | 5.30577528    | 5.64365752    | 2.92988192     | 3.99067024     | 2.60699132     | 0.0005198 | -1.667072 | down      | -                                                                                                              |
| c36493.graph_c0 | 4.94490717    | 5.2052086     | 3.60587068    | 2.45856213     | 3.31313886     | 3.16882294     | 2.691E-11 | -1.640823 | down      | PREDICTED: plastidial pyruvate kinase 4, chloroplastic [Sesamum indicum]                                       |
| c36499.graph_c0 | 1.48368126    | 0.90083896    | 0.9376668     | 0.73945099     | 0.45102468     | 0.65795904     | 2.457E-05 | -1.85343  | down      | -                                                                                                              |
| c36504.graph_c0 | 4.08400932    | 4.84116968    | 5.66243844    | 123.66598      | 134.365629     | 131.357513     | 1.752E-81 | 3.716621  | up        | hypothetical protein MIMGU_mgv1a014610mg [Erythranthe guttata]                                                 |
| c36508.graph_c0 | 0.18668804    | 0.22424997    | 0.16793106    | 10.6117334     | 12.5536971     | 11.6765669     | 9.962E-64 | 4.893192  | up        | PREDICTED: uncharacterized protein LOC105176006 [Sesamum indicum]                                              |
| c36516.graph_c0 | 0.27344945    | 0.18248218    | 0.58565563    | 3.52687262     | 2.31294384     | 2.68987719     | 0.0002427 | 2.012727  | up        | -                                                                                                              |
| c36519.graph_c1 | 5.93133978    | 6.01540121    | 5.44070855    | 2.67824416     | 2.513559       | 2.55901804     | 1.732E-25 | -2.180957 | down      | PREDICTED: uncharacterized protein LOC105168551 [Sesamum indicum]                                              |
| c36532.graph_c0 | 1.25095327    | 1.14608677    | 1.30781653    | 7.69608712     | 10.9052499     | 14.4432272     | 1.612E-06 | 2.130508  | up        | PREDICTED: uncharacterized protein LOC105171185 [Sesamum indicum]                                              |

| #ID             | 0 h-1<br>FPKM | 0 h-2<br>FPKM | 0 h-3<br>FPKM | 48 h-1<br>FPKM | 48 h-2<br>FPKM | 48 h-3<br>FPKM | FDR       | log2FC    | regulated | nr_annotation                                                                               |
|-----------------|---------------|---------------|---------------|----------------|----------------|----------------|-----------|-----------|-----------|---------------------------------------------------------------------------------------------|
| c36534.graph_c0 | 56.5780661    | 60.2174521    | 57.9930426    | 26.1251128     | 25.9522129     | 21.252382      | 7.713E-57 | -2.268949 | down      | hypothetical protein MIMGU_mgv1a004539mg [Erythranthe guttata]                              |
| c36536.graph_c0 | 7.92304631    | 7.7668908     | 9.54947748    | 34.2811974     | 45.9692471     | 44.8813652     | 6.665E-13 | 1.284856  | up        | unnamed protein product [Coffea canephora]                                                  |
| c36540.graph_c0 | 130.661301    | 119.746792    | 122.726095    | 505.54155      | 555.241486     | 582.886043     | 2.913E-15 | 1.119943  | up        | hypoteucal protein FOR IR_0009S10050g [Propinus trichocarpal]                               |
| c36541.graph_c0 | 0.49983457    | 0.44474229    | 0.2141024     | 1.73959188     | 3.08954529     | 3.59654098     | 0.0006277 | 1.841684  | up        | PREDICTED: organic cation/carnitine transporter 7-like [Sesamum indicum]                    |
| c36549.graph_c0 | 2.89047464    | 2.36193389    | 2.50151742    | 12.8797107     | 14.4504954     | 12.862603      | 1.856E-05 | 1.356021  | up        | -                                                                                           |
| c36557.graph_c0 | 0             | 0             | 0             | 7.95490657     | 4.96271915     | 6.21311127     | 3.762E-14 | Inf       | up        | hypothetical protein MIMGU_mgv1a015689mg [Erythranthe guttata]                              |
| c36558.graph_c0 | 1.01066323    | 1.46692912    | 1.10393092    | 12.15071       | 10.0610329     | 8.20192519     | 3.337E-08 | 2.074703  | up        | PREDICTED: uncharacterized protein LOC105159405 [Sesamum indicum]                           |
| c36561.graph_c0 | 1032.83313    | 1046.67282    | 1077.48139    | 108.287888     | 75.9039569     | 48.0453247     | 6.72E-153 | -4.771835 | down      | hypothetical protein MIMGU_mgv1a011962mg [Erythranthe guttata]                              |
| c36567.graph_c0 | 0.15150885    | 0.25276761    | 0.19469487    | 24.7521578     | 19.2556881     | 16.3526444     | 4.849E-25 | 5.643571  | up        | PREDICTED: uncharacterized protein LOC105164077 [Sesamum indicum]                           |
| c36568.graph_c0 | 1.49904116    | 0.69255795    | 0.59271607    | 12.6415942     | 10.4662014     | 12.9498553     | 5.59E-08  | 2.686725  | up        | hypothetical protein MIMGU_mgv1a007969mg [Erythranthe guttata]                              |
| c36568.graph_c1 | 0.74314382    | 0.83687396    | 0.71622693    | 8.72906515     | 9.79134996     | 8.68084258     | 2.268E-07 | 2.548448  | up        | PREDICTED: probable purine permease γ [Sesamum indicum]                                     |
| c36569.graph_c0 | 0.21343015    | 0             | 0.45711032    | 10.6833338     | 14.511648      | 14.1714711     | 4.979E-22 | 4.837072  | up        | PREDICTED: uncharacterized protein LOC105167095 [Sesamum indicum]                           |
| c36570.graph_c0 | 6.17352697    | 5.38430076    | 4.79135466    | 35.7577661     | 36.1510181     | 33.2200016     | 2.036E-23 | 1.670097  | up        | PREDICTED: protein trichome birefringence-like 25 [Sesamum indicum]                         |
| c36574.graph_c0 | 29.5570487    | 29.8924507    | 25.6157524    | 41.8650626     | 22.5481759     | 17.0604606     | 0.0008352 | -1.062794 | down      | PREDICTED: uncharacterized protein LOC105176146 [Sesamum indicum]                           |
| c36575.graph_c0 | 32.6154049    | 31.9629003    | 31.2691433    | 17.7825343     | 17.9031972     | 17.4219041     | 1.381E-35 | -1.868774 | down      | PREDICTED: PCI domain-containing protein 2 [Sesamum indicum]                                |
| c36583.graph_c1 | 3.72816883    | 2.44008978    | 3.31673853    | 2.64202484     | 2.09917872     | 2.46840071     | 0.0049726 | -1.410113 | down      | PREDICTED: WD repeat-containing protein 48-like [Nicotiana tomentosiformis]                 |
| c36586.graph_c0 | 1.40038005    | 1.86904309    | 1.39964519    | 50.7447768     | 57.2506853     | 56.1216237     | 3.407E-60 | 4.117059  | up        | PREDICTED: GDP-mannose 3,5-epimerase 2 [Sesamum indicum]                                    |
| c36586.graph_c1 | 1.44949874    | 1.10548586    | 1.41917201    | 33.7022654     | 36.5118439     | 38.3055198     | 9.321E-42 | 3.751099  | up        | GDP-mannose 3,5-epimerase 1 [Gossypium arboreum]                                            |
| c36599.graph_c0 | 3.99975509    | 4.05860627    | 4.92861719    | 35.2835597     | 33.6354403     | 34.7636721     | 1.029E-21 | 1.978004  | up        | PREDICTED: trafficking protein particle complex subunit 3-like isoform X1 [Sesamum indicum] |
| c36600.graph_c0 | 0.08138728    | 0.10862504    | 0.06972392    | 44.7376323     | 48.6649999     | 54.3513872     | 4.16E-194 | 8.134772  | up        | hypothetical protein MIMGU_mgv1a021873mg [Erythranthe guttata]                              |
| c36602.graph_c0 | 19.1787674    | 17.6649216    | 19.5016829    | 14.0451985     | 17.86861       | 18.6033361     | 4.903E-13 | -1.180191 | down      | PREDICTED: TOM1-like protein 2 [Sesamum indicum]                                            |
| c36604.graph_c0 | 0             | 0             | 0             | 2.69885069     | 1.75445083     | 2.23768786     | 1.224E-11 | Inf       | up        | Peptidase S1A, chymotrypsin-type [Penicillium italicum]                                     |

| #ID             | 0 h-1<br>FPKM | 0 h-2<br>FPKM | 0 h-3<br>FPKM | 48 h-1<br>FPKM | 48 h-2<br>FPKM | 48 h-3<br>FPKM | FDR       | log2FC    | regulated | nr_annotation                                                                                                      |
|-----------------|---------------|---------------|---------------|----------------|----------------|----------------|-----------|-----------|-----------|--------------------------------------------------------------------------------------------------------------------|
| c36605.graph_c0 | 9.60312159    | 10.0071064    | 9.80902909    | 3.99250222     | 3.9892554      | 3.71398194     | 1.759E-19 | -2.347697 | down      | PREDICTED: protein FAR-RED IMPAIRED RESPONSE 1 isoform X1 [Sesamum indicum]                                        |
| c36606.graph_c0 | 170.246824    | 155.806892    | 158.850346    | 17.1013123     | 11.3229792     | 10.7068731     | 3.08E-190 | -4.639364 | down      | unnamed protein product [Coffea canephora]                                                                         |
| c36607.graph_c0 | 54.7426035    | 48.1577325    | 54.3772636    | 40.0146574     | 37.8669254     | 35.5720464     | 3.979E-25 | -1.487464 | down      | PREDICTED: nuclear pore complex protein NUP50A-like [Sesamum indicum]                                              |
| c36608.graph_c0 | 1.95914512    | 2.54943898    | 4.02812648    | 26.3514272     | 27.9161418     | 23.9291361     | 2.05E-07  | 2.170838  | up        | -                                                                                                                  |
| c36608.graph_c1 | 34.2109807    | 35.5447223    | 36.2101551    | 159.064312     | 143.6913       | 166.949326     | 3.058E-15 | 1.131022  | up        | PREDICTED: gamma carbonic anhydrase-like 2, mitochondrial [Sesamum indicum]                                        |
| c36617.graph_c0 | 2.60037857    | 1.60183535    | 1.54227204    | 23.9563834     | 24.0123281     | 25.9074374     | 9.569E-09 | 2.670826  | up        | predicted Rac-like GTPase ortholog, partial [Nicotiana glauca]                                                     |
| c36625.graph_c0 | 3.05897799    | 3.33422252    | 4.28032185    | 42.2093256     | 45.8435054     | 44.3001413     | 8.516E-33 | 2.610093  | up        | PREDICTED: uncharacterized protein LOC105164615 [Sesamum indicum]                                                  |
| c36630.graph_c0 | 33.0186308    | 34.6436334    | 35.6180521    | 129.489699     | 147.895715     | 161.77862      | 1.071E-13 | 1.06696   | up        | hypothetical protein M569_05689 [Genlisea aurea]                                                                   |
| c36632.graph_c0 | 0.67359575    | 0.41205405    | 0.76941974    | 13.4454741     | 18.1152547     | 17.9148768     | 2.582E-35 | 3.711016  | up        | PREDICTED: protein trichome birefringence-like 23 [Sesamum indicum]                                                |
| c36638.graph_c0 | 7.5533667     | 7.27012524    | 7.83976463    | 55.7178945     | 74.7237544     | 79.3455655     | 6.098E-21 | 2.186728  | up        | PREDICTED: probable methyltransferase PMT20 [Sesamum indicum]                                                      |
| c36639.graph_c0 | 0.09696325    | 0.19412068    | 0.31150402    | 5.04708096     | 9.03746129     | 10.2534732     | 1.208E-10 | 4.297969  | up        | PREDICTED: B-box zinc finger protein 24 [Sesamum indicum]                                                          |
| c36654.graph_c0 | 20.0131601    | 18.9028003    | 23.2991103    | 106.289752     | 107.88643      | 107.741535     | 4.412E-20 | 1.351725  | up        | PREDICTED: uncharacterized protein LOC105177676 [Sesamum indicum]                                                  |
| c36664.graph_c0 | 5.84940272    | 3.00895306    | 3.34076181    | 0              | 0              | 0              | 6.084E-15 | -Inf      | down      | predicted protein [Hordeum vulgare subsp. vulgare]                                                                 |
| c36665.graph_c0 | 0.57681259    | 0.73486023    | 0.33692137    | 13.8646408     | 14.7902605     | 17.4948653     | 1.493E-24 | 3.792968  | up        | PREDICTED: LOW QUALITY PROTEIN: single-stranded DNA-binding protein WHY1, chloroplastic, partial [Sesamum indicum] |
| c36666.graph_c0 | 12.7048608    | 11.8970936    | 13.16633      | 3.39809414     | 2.47263709     | 3.08468663     | 2.576E-46 | -3.089988 | down      | PREDICTED: uncharacterized protein LOC105167713 [Sesamum indicum]                                                  |
| c36669.graph_c0 | 1.30437649    | 1.45490349    | 1.67617543    | 44.9770421     | 46.5201808     | 52.2096912     | 3.024E-92 | 3.99659   | up        | PREDICTED: enoyl-[acyl-carrier-protein] reductase [NADH], chloroplastic-like [Sesamum indicum]                     |
| c36674.graph_c0 | 9.79846317    | 10.4599875    | 10.4579843    | 96.2978193     | 99.124725      | 101.642792     | 1.515E-54 | 2.255079  | up        | PREDICTED: peroxidase 17 [Sesamum indicum]                                                                         |
| c36676.graph_c1 | 0.14926629    | 0.74707878    | 0.19181309    | 4.53795675     | 6.70124504     | 2.81425674     | 0.0016939 | 2.676153  | up        | PREDICTED: uncharacterized protein At1g04910 [Sesamum indicum]                                                     |
| c36679.graph_c0 | 23.9546694    | 28.701725     | 18.656181     | 11.2572171     | 7.9110791      | 5.3554121      | 7.884E-14 | -2.543845 | down      | hypothetical protein MIMGU_mgv1a014406mg [Erythranthe guttata]                                                     |
| c36684.graph_c0 | 18.2798318    | 18.9581893    | 22.1251394    | 7.79593676     | 9.47443796     | 7.98780457     | 6.417E-29 | -2.254721 | down      | PREDICTED: uncharacterized protein LOC105176815 isoform X1 [Sesamum indicum]                                       |
| c36688.graph_c0 | 31.037148     | 25.0472528    | 25.9709533    | 103.401877     | 139.363406     | 151.667518     | 2.623E-08 | 1.242825  | up        | hypothetical protein PHAVU_002G171200g, partial [Phaseolus vulgaris]                                               |

| #ID             | 0 h-1<br>FPKM | 0 h-2<br>FPKM | 0 h-3<br>FPKM | 48 h-1<br>FPKM | 48 h-2<br>FPKM | 48 h-3<br>FPKM | FDR       | log2FC    | regulated | nr_annotation                                                                                             |
|-----------------|---------------|---------------|---------------|----------------|----------------|----------------|-----------|-----------|-----------|-----------------------------------------------------------------------------------------------------------|
| c36691.graph_c0 | 0.63963765    | 0.57436716    | 0.54394392    | 2.07113155     | 2.65313214     | 3.06889706     | 5.911E-05 | 1.126655  | up        | PREDICTED: uncharacterized protein LOC105169716 isoform X1 [Sesamum indicum]                              |
| c36695.graph_c0 | 7.15790988    | 6.79397782    | 6.55967079    | 2.8111302      | 4.03567737     | 4.62862333     | 3.012E-16 | -1.861986 | down      | PREDICTED: two-pore potassium channel 3-like [Sesamum indicum]                                            |
| c36697.graph_c0 | 0.15812729    | 0.11871422    | 0.30479974    | 1.89380323     | 2.00625489     | 2.46283076     | 7.522E-06 | 2.422333  | up        | PREDICTED: rho GTPase-activating protein REN1 [Sesamum indicum]                                           |
| c36704.graph_c0 | 12.5134983    | 12.5642178    | 10.9816962    | 8.64618815     | 8.93618336     | 7.47441044     | 9.59E-16  | -1.540494 | down      | hypothetical protein MIMGU_mgv1a022795mg [Erythranthe guttata]                                            |
| c36707.graph_c0 | 0.13521344    | 0             | 0.08687731    | 1.68166044     | 3.29910245     | 3.21434141     | 8.54E-08  | 4.176882  | up        | PREDICTED: uncharacterized protein LOC105163665 [Sesamum indicum]                                         |
| c36710.graph_c0 | 6.73422813    | 6.74097144    | 6.34608316    | 1.79226961     | 1.60658582     | 2.08544325     | 2.31E-09  | -2.870501 | down      | hypothetical protein MIMGU_mgv1a009490mg [Erythranthe guttata]                                            |
| c36710.graph_c1 | 11.2816424    | 9.61991121    | 10.3808236    | 2.95120803     | 4.34983939     | 6.05114172     | 1.49E-08  | -2.254455 | down      | PREDICTED: zinc finger CCCH domain-containing protein 20-like [Sesamum indicum]                           |
| c36719.graph_c0 | 0.27511764    | 0.55078625    | 0.61868984    | 8.55415048     | 13.8280707     | 12.9112433     | 1.876E-15 | 3.579568  | up        | PREDICTED: uncharacterized protein LOC105157890 [Sesamum indicum]                                         |
| c36719.graph_c1 | 0.30257204    | 0.70670837    | 0.64802841    | 9.15226196     | 18.3086537     | 16.039226      | 3.981E-10 | 3.68162   | up        | PREDICTED: uncharacterized protein LOC105157890 [Sesamum indicum]                                         |
| c36723.graph_c0 | 0.91393027    | 0.77562982    | 0.56168706    | 19.2006263     | 28.9889413     | 30.1627098     | 6.859E-25 | 4.100547  | up        | PREDICTED: dolichyl-diphosphooligosaccharide--protein glycosyltransferase subunit STT3A [Sesamum indicum] |
| c36725.graph_c0 | 1.43323798    | 2.08679731    | 1.50690072    | 22.2065979     | 23.2708714     | 22.7498937     | 2.874E-11 | 2.745489  | up        | PREDICTED: uncharacterized protein LOC104897046 [Beta vulgaris subsp. vulgaris]                           |
| c36729.graph_c1 | 0.17854026    | 0.40211785    | 0.34414696    | 33.4722772     | 44.956429      | 52.5783665     | 9.887E-40 | 6.11934   | up        | PREDICTED: probable inactive receptor kinase At5g58300-like isoform X1 [Glycine max]                      |
| c36731.graph_c0 | 6.63703525    | 8.00648764    | 7.21672182    | 199.112221     | 225.883422     | 219.717283     | 5.655E-87 | 3.862525  | up        | hypothetical protein 0_2321_02, partial [Pinus lambertiana]                                               |
| c36731.graph_c2 | 5.3185548     | 5.89943518    | 6.46511816    | 119.846449     | 114.336648     | 112.17679      | 2.023E-52 | 3.273742  | up        | PREDICTED: tubulin beta-1 chain [Sesamum indicum]                                                         |
| c36731.graph_c3 | 2.76625666    | 2.42289832    | 1.333031      | 63.0742876     | 52.9831862     | 56.6900221     | 2.195E-15 | 3.719259  | up        | PREDICTED: tubulin beta-6 chain-like [Citrus sinensis]                                                    |
| c36732.graph_c0 | 1.26794341    | 1.60766988    | 1.62935748    | 11.1360027     | 19.6070755     | 20.6259025     | 5.992E-08 | 2.482046  | up        | PREDICTED: LOW QUALITY PROTEIN: probable galacturonosyltransferase-like 7 [Sesamum indicum]               |
| c36736.graph_c0 | 86.5260092    | 84.9418416    | 88.079676     | 28.1253887     | 26.8526796     | 24.7168412     | 2.174E-76 | -2.719568 | down      | PREDICTED: uncharacterized protein LOC105162600 [Sesamum indicum]                                         |
| c36738.graph_c0 | 3.09743751    | 3.62989947    | 2.62119282    | 15.9381848     | 17.5481601     | 17.8355017     | 8.49E-06  | 1.439726  | up        | PREDICTED: uncharacterized protein LOC105156818 [Sesamum indicum]                                         |
| c36747.graph_c0 | 2.03885284    | 2.13366237    | 1.54818573    | 1.02454048     | 2.1255288      | 1.89922908     | 0.0052946 | -1.20621  | down      | -                                                                                                         |
| c36759.graph_c0 | 1418.62285    | 1555.23514    | 1461.46938    | 31.039205      | 25.6951484     | 23.9097282     | 5.11E-224 | -6.794334 | down      | PREDICTED: GEM-like protein 5 [Sesamum indicum]                                                           |
| c36760.graph_c0 | 16.3360711    | 16.2620843    | 16.701214     | 3.46451525     | 4.02257626     | 4.73503463     | 3.976E-63 | -3.033769 | down      | PREDICTED: sodium/hydrogen exchanger 1-like [Sesamum indicum]                                             |

| #ID             | 0 h-1<br>FPKM | 0 h-2<br>FPKM | 0 h-3<br>FPKM | 48 h-1<br>FPKM | 48 h-2<br>FPKM | 48 h-3<br>FPKM | FDR       | log2FC    | regulated | nr_annotation                                                                                |
|-----------------|---------------|---------------|---------------|----------------|----------------|----------------|-----------|-----------|-----------|----------------------------------------------------------------------------------------------|
| c36762.graph_c0 | 0             | 0.42407859    | 0.09073544    | 22.3120376     | 24.8773186     | 31.6029207     | 4.932E-42 | 6.240376  | up        | PREDICTED: glucomannan 4-beta-mannosyltransferase 2-like [Sesamum indicum]                   |
| c36762.graph_c1 | 0.10188959    | 0             | 0.06546608    | 16.2390487     | 19.6893295     | 24.5974025     | 2.269E-39 | 7.475906  | up        | PREDICTED: glucomannan 4-beta-mannosyltransferase 2-like [Sesamum indicum]                   |
| c36764.graph_c1 | 0.32280271    | 0             | 0             | 22.6014054     | 23.3133577     | 23.2859516     | 2.266E-14 | 6.747294  | up        | PREDICTED: probable small nuclear ribonucleoprotein F isoform X2 [Nicotiana tomentosiformis] |
| c36764.graph_c2 | 2.20539106    | 0.36793324    | 0             | 10.4973755     | 8.60957143     | 12.6548731     | 2.321E-05 | 2.628598  | up        | hypothetical protein MIMGU_mgv1a017211mg [Erythranthe guttata]                               |
| c36767.graph_c0 | 77.8982265    | 71.4447157    | 75.248726     | 17.1089066     | 24.7869051     | 23.5071274     | 3.073E-82 | -2.803631 | down      | PREDICTED: uncharacterized protein LOC105169073 [Sesamum indicum]                            |
| c36770.graph_c0 | 99.3520527    | 106.805938    | 103.460261    | 6.02505713     | 6.08404727     | 7.39141834     | 1.19E-213 | -5.008212 | down      | PREDICTED: probable protein phosphatase 2C 49 [Sesamum indicum]                              |
| c36772.graph_c0 | 5.19648461    | 5.89882156    | 4.95663473    | 68.9969289     | 75.2898333     | 78.6076995     | 3.354E-58 | 2.777136  | up        | PREDICTED: protein CREG1 isoform A1 [Sesamum indicum]                                        |
| c36783.graph_c0 | 0.60219266    | 0.42698026    | 0.4191641     | 61.83476       | 84.8277663     | 82.0469415     | 2.792E-90 | 6.28272   | up        | PREDICTED: probable methyltransferase PMT3 [Sesamum indicum]                                 |
| c36786.graph_c0 | 0             | 0             | 0.0373088     | 1.57808888     | 1.55845186     | 1.85636562     | 8.667E-13 | 6.013215  | up        | PREDICTED: uncharacterized protein LOC105170278 isoform X1 [Sesamum indicum]                 |
| c36791.graph_c0 | 64.7031365    | 64.4122763    | 59.0494516    | 261.056501     | 266.540293     | 282.154644     | 2.209E-14 | 1.088192  | up        | PREDICTED: FRIGIDA-like protein 4a [Sesamum indicum]                                         |
| c36799.graph_c0 | 105.804709    | 112.891859    | 112.811027    | 6.63927533     | 7.68580822     | 7.00334941     | 5.77E-212 | -4.978163 | down      | PREDICTED: uncharacterized protein LOC105174622 [Sesamum indicum]                            |
| c36800.graph_c0 | 8.61204457    | 9.34408094    | 7.35208204    | 0.55482358     | 0.58776831     | 0.78988589     | 1.45E-36  | -4.729956 | down      | hypothetical protein MIMGU_mgv1a002177mg [Erythranthe guttata]                               |
| c36801.graph_c0 | 0.0635073     | 0.0211903     | 0.02720313    | 2.78883705     | 2.89245354     | 3.01943591     | 1.491E-18 | 5.268647  | up        | PREDICTED: BTB/POZ domain-containing protein At3g08570 [Sesamum indicum]                     |
| c36802.graph_c0 | 6.89943425    | 6.76539721    | 6.51382984    | 4.58338869     | 7.05428171     | 8.1565434      | 9.895E-05 | -1.053204 | down      | -                                                                                            |
| c36803.graph_c0 | 0             | 0             | 0             | 2.90866382     | 2.92335731     | 1.85813139     | 2.006E-11 | Inf       | up        | --                                                                                           |
| c36807.graph_c0 | 117.928822    | 125.60817     | 114.891674    | 89.4465993     | 88.4660589     | 87.4358535     | 5.435E-25 | -1.450378 | down      | PREDICTED: uncharacterized protein LOC105162095 [Sesamum indicum]                            |
| c36813.graph_c0 | 0.90059375    | 0.95300959    | 0.82664187    | 6.6374856      | 5.22348257     | 4.40840324     | 9.424E-06 | 1.591653  | up        | PREDICTED: WPP domain-interacting tail-anchored protein 2-like [Sesamum indicum]             |
| c36814.graph_c0 | 32.9132465    | 32.54531      | 36.2593907    | 8.41900352     | 9.55851672     | 8.23731204     | 1.038E-77 | -2.976011 | down      | PREDICTED: uncharacterized protein At5g19025-like isoform X2 [Sesamum indicum]               |
| c36825.graph_c0 | 0             | 0.13483276    | 0.1730921     | 8.56238041     | 7.03315947     | 5.52083667     | 4.714E-15 | 5.074822  | up        | PREDICTED: transcription factor DFLH104 [Sesamum indicum]                                    |
| c36829.graph_c0 | 77.2286372    | 76.2254546    | 76.291389     | 41.0434794     | 44.6298563     | 40.9444994     | 7.529E-34 | -1.877858 | down      | PREDICTED: transcription factor ILK5-like [Sesamum indicum]                                  |
| c36831.graph_c0 | 0.41742301    | 0.64997489    | 0.65560623    | 9.22937534     | 25.3940911     | 27.4501815     | 6.529E-06 | 4.134592  | up        | PREDICTED: 1-aminocyclopropane-1-carboxylate oxidase 5-like [Sesamum indicum]                |
| c36832.graph_c0 | 0.68554216    | 0.21114727    | 0.33882647    | 12.0483389     | 11.1682848     | 10.5476276     | 9.916E-19 | 3.761581  | up        | protein with unknown function [Ricinus communis]                                             |

| #ID             | 0 h-1<br>FPKM | 0 h-2<br>FPKM | 0 h-3<br>FPKM | 48 h-1<br>FPKM | 48 h-2<br>FPKM | 48 h-3<br>FPKM | FDR       | log2FC    | regulated | nr_annotation                                                                                                         |
|-----------------|---------------|---------------|---------------|----------------|----------------|----------------|-----------|-----------|-----------|-----------------------------------------------------------------------------------------------------------------------|
| c36835.graph_c0 | 52.0723284    | 52.790362     | 50.4355811    | 40.8225252     | 41.5152121     | 40.837584      | 1.478E-21 | -1.351542 | down      | PREDICTED: NAC transcription factor 29-like isoform X1 [Sesamum indicum]                                              |
| c36843.graph_c0 | 2.24591195    | 1.54040654    | 1.33615082    | 0.30653046     | 1.09596999     | 0.88643411     | 1.859E-06 | -2.193408 | down      | --                                                                                                                    |
| c36851.graph_c0 | 1.51207359    | 2.09949261    | 1.5669955     | 12.9865489     | 11.8058931     | 16.0335522     | 1.684E-10 | 1.961697  | up        | PREDICTED: serine/threonine-protein kinase D6PKL2 [Sesamum indicum]                                                   |
| c36851.graph_c1 | 0             | 1.18320614    | 1.32907752    | 9.25612809     | 9.94994749     | 11.748479      | 7.193E-07 | 2.59119   | up        | PREDICTED: serine/threonine-protein kinase D6PKL2 [Sesamum indicum]                                                   |
| c36852.graph_c0 | 1.28556562    | 0.7218931     | 0.68497674    | 21.0004925     | 31.2137894     | 28.6331895     | 1.982E-31 | 3.889065  | up        | PREDICTED: probable polygalacturonase isoform X2 [Sesamum indicum]                                                    |
| c36853.graph_c0 | 171.511192    | 167.237817    | 150.169434    | 20.024545      | 35.1278593     | 48.1525473     | 1.07E-104 | -3.270259 | down      | PREDICTED: uncharacterized protein LOC105157533 [Sesamum indicum]                                                     |
| c36854.graph_c0 | 0.294792      | 0.20656103    | 0.35987842    | 9.07082613     | 9.47997188     | 9.41233344     | 3.859E-54 | 3.999105  | up        | PREDICTED: adenylate adenylase 2A1 [Sesamum indicum]                                                                  |
| c36857.graph_c0 | 11.778537     | 11.5599697    | 10.1085138    | 5.0304651      | 6.22757157     | 7.58017739     | 2.729E-28 | -1.849448 | down      | PREDICTED: ABC transporter C family member 5-like [Sesamum indicum]                                                   |
| c36865.graph_c0 | 0             | 0.09257952    | 0             | 61.0919642     | 62.0567304     | 78.2788541     | 4.84E-102 | 10.07941  | up        | PREDICTED: cinnamoyl-CoA reductase 1-like [Sesamum indicum]                                                           |
| c36866.graph_c0 | 0.87074821    | 0.87162013    | 1.35045198    | 18.2290772     | 13.3627354     | 10.2883331     | 6.011E-07 | 2.745231  | up        | PREDICTED: adenine/guanine permease AZG1 [Sesamum indicum]                                                            |
| c36868.graph_c0 | 5.85884804    | 1.90060202    | 2.43990564    | 0              | 0              | 0              | 1.916E-07 | -Inf      | down      | PREDICTED: ribulose biphosphate carboxylase/oxygenase activase 2, chloroplastic-like isoform X2 [Phoenix dactyloides] |
| c36871.graph_c0 | 2.92743281    | 3.3018188     | 3.0730745     | 12.0792615     | 16.0962427     | 18.7583966     | 3.976E-07 | 1.311192  | up        | PREDICTED: fatty acyl-CoA reductase 3-like isoform X1 [Sesamum indicum]                                               |
| c36878.graph_c0 | 6.97047104    | 8.00166389    | 6.20439       | 24.655611      | 31.6743425     | 33.4449424     | 1.774E-09 | 1.063168  | up        | PREDICTED: transcription factor bHLH143-like [Sesamum indicum]                                                        |
| c36881.graph_c0 | 3.71753715    | 3.63794792    | 2.95900105    | 60.8803239     | 62.7624493     | 62.448958      | 8.619E-86 | 3.157631  | up        | PREDICTED: 65-kDa microtubule-associated protein 1 [Sesamum indicum]                                                  |
| c36885.graph_c0 | 20.9165267    | 22.1464593    | 16.2259053    | 26.2239454     | 16.0471293     | 8.66302309     | 0.0005128 | -1.218776 | down      | PREDICTED: uncharacterized protein LOC105173633 [Sesamum indicum]                                                     |
| c36890.graph_c0 | 25.8125898    | 27.6692356    | 24.5228884    | 8.36123459     | 10.844806      | 9.33508048     | 9.987E-54 | -2.470952 | down      | PREDICTED: uncharacterized protein LOC105180144 isoform X2 [Sesamum indicum]                                          |
| c36892.graph_c0 | 2.12702127    | 2.23053931    | 2.21267672    | 30.3263803     | 27.9753099     | 26.9012024     | 6.263E-16 | 2.681126  | up        | PREDICTED: uncharacterized protein At1g76660-like [Sesamum indicum]                                                   |
| c36892.graph_c1 | 4.15314489    | 3.34391814    | 2.78449858    | 48.9913294     | 46.9658723     | 39.0035386     | 5.741E-26 | 2.702694  | up        | PREDICTED: uncharacterized protein At1g76660-like [Sesamum indicum]                                                   |
| c36897.graph_c0 | 0.54051123    | 0.59023906    | 0.50514788    | 2.17289107     | 3.45287191     | 4.51132594     | 0.0008195 | 1.605324  | up        | PREDICTED: probable LRR receptor-like serine/threonine-protein kinase At2g24230 [Sesamum indicum]                     |



| #ID             | 0 h-1<br>FPKM | 0 h-2<br>FPKM | 0 h-3<br>FPKM | 48 h-1<br>FPKM | 48 h-2<br>FPKM | 48 h-3<br>FPKM | FDR       | log2FC    | regulated | nr_annotation                                                                                     |
|-----------------|---------------|---------------|---------------|----------------|----------------|----------------|-----------|-----------|-----------|---------------------------------------------------------------------------------------------------|
| c36899.graph_c0 | 2.8531731     | 3.56236015    | 2.77939836    | 14.1460091     | 15.5399087     | 15.303117      | 5.259E-14 | 1.272729  | up        | PREDICTED: starch synthase 3, chloroplastic/amyloplastic [Sesamum indicum]                        |
| c36900.graph_c0 | 0             | 0.15550867    | 0             | 2.28994264     | 2.3248367      | 2.12247624     | 2.289E-09 | 4.431773  | up        | PREDICTED: probable LRR receptor-like serine/threonine-protein kinase At1g06840 [Sesamum indicum] |
| c36900.graph_c1 | 0.09710944    | 0             | 0             | 2.72863832     | 3.26976458     | 2.86574869     | 3.837E-12 | 5.513626  | up        | PREDICTED: probable LRR receptor-like serine/threonine-protein kinase At1g06840 [Sesamum indicum] |
| c36904.graph_c0 | 15.496594     | 15.6374849    | 15.348648     | 2.79025854     | 3.25597966     | 3.62146257     | 6.23E-102 | -3.286413 | down      | PREDICTED: LOW QUALITY PROTEIN: U-box domain-containing protein 17-like [Sesamum indicum]         |
| c36905.graph_c0 | 3.06531597    | 3.42937193    | 3.01221652    | 17.8297651     | 16.2487805     | 15.6184696     | 2.175E-06 | 1.371473  | up        | PREDICTED: outer envelope pore protein 24A, chloroplastic-like [Sesamum indicum]                  |
| c36918.graph_c0 | 9.2002345     | 9.91016595    | 9.76654983    | 55.0009358     | 50.6540717     | 52.8743363     | 8.711E-12 | 1.440259  | up        | PREDICTED: probable small nuclear ribonucleoprotein F isoform X1 [Sesamum indicum]                |
| c36920.graph_c0 | 0.25863176    | 0.17259383    | 0.08308801    | 2.1841274      | 1.87208923     | 2.06709583     | 4.124E-07 | 2.567677  | up        | hypothetical protein MIMGU_mgv1a002741mg [Erythranthe guttata]                                    |
| c36923.graph_c0 | 10.4806406    | 10.4436642    | 8.71461288    | 47.2723827     | 47.3948817     | 48.0882971     | 1.015E-13 | 1.252346  | up        | PREDICTED: uncharacterized protein LOC105173973 [Sesamum indicum]                                 |
| c36925.graph_c0 | 25.5276409    | 29.5790905    | 24.1902797    | 12.6079722     | 15.7008405     | 21.6127796     | 6.468E-21 | -1.690245 | down      | PREDICTED: protein ECEKIFEKUM1-like [Sesamum indicum]                                             |
| c36926.graph_c0 | 4.22277186    | 4.93941611    | 5.36545791    | 191.148884     | 199.674358     | 212.671974     | 2.09E-162 | 4.355728  | up        | hypothetical protein CICLE_V10008112mg [Citrus                                                    |
| c36926.graph_c1 | 3.65784063    | 3.50230761    | 3.47426046    | 137.284407     | 138.606736     | 150.705438     | 5.252E-78 | 4.308202  | up        | PREDICTED: serine carboxypeptidase 11-2 [Sesamum indicum]                                         |
| c36930.graph_c0 | 19.5663794    | 22.4875976    | 16.451967     | 215.864817     | 227.503822     | 218.213286     | 1.5E-38   | 2.483483  | up        | PREDICTED: protein transport protein Sec61 subunit beta-like [Vitis vinifera]                     |
| c36933.graph_c0 | 0             | 0.02368482    | 0             | 0.63214713     | 0.83133091     | 0.93100256     | 2.44E-10  | 5.648064  | up        | PREDICTED: uncharacterized protein LOC105176404 [Sesamum indicum]                                 |
| c36938.graph_c0 | 71.2579824    | 67.6811949    | 61.30252      | 41.8941306     | 39.5507234     | 34.5125725     | 3.551E-36 | -1.801951 | down      | PREDICTED: uncharacterized protein LOC105174627 [Sesamum indicum]                                 |
| c36942.graph_c0 | 2.08721367    | 1.8716679     | 1.89985781    | 0.56083923     | 0.63657982     | 1.03370785     | 2.369E-07 | -2.415744 | down      | -                                                                                                 |
| c36943.graph_c0 | 23.1671247    | 22.1223476    | 23.6598502    | 0.56165964     | 1.07101851     | 1.92408128     | 1.92E-160 | -5.308714 | down      | PREDICTED: probable protein phosphatase 2C 24 [Sesamum indicum]                                   |
| c36948.graph_c0 | 17.9822936    | 18.579709     | 17.9012302    | 17.5263211     | 18.152738      | 15.5631827     | 1.984E-11 | -1.104721 | down      | PREDICTED: mitochondrial ribosome-associated GTPase 1 [Sesamum indicum]                           |
| c36949.graph_c0 | 64.2194328    | 65.8768922    | 56.4479945    | 7.69780505     | 8.38788793     | 7.63225614     | 6.05E-116 | -3.992363 | down      | PREDICTED: probable receptor-like protein kinase At5g47070 [Sesamum indicum]                      |
| c36951.graph_c0 | 13.2609844    | 13.3270437    | 13.9918242    | 127.269326     | 131.558679     | 126.383183     | 7.859E-56 | 2.228493  | up        | PREDICTED: mechanosensitive ion channel protein 8-like [Sesamum indicum]                          |
| c36954.graph_c0 | 34.8819259    | 33.943078     | 34.1691267    | 3.37145408     | 3.25517175     | 1.78475037     | 6.54E-138 | -4.626503 | down      | PREDICTED: heat stress transcription factor B-2b [Sesamum indicum]                                |
| c36959.graph_c0 | 3.43120575    | 3.00193083    | 2.96842214    | 16.3652813     | 18.0094179     | 18.5039156     | 1.986E-20 | 1.473353  | up        | PREDICTED: protein PIR [Sesamum indicum]                                                          |

| #ID             | 0 h-1<br>FPKM | 0 h-2<br>FPKM | 0 h-3<br>FPKM | 48 h-1<br>FPKM | 48 h-2<br>FPKM | 48 h-3<br>FPKM | FDR       | log2FC    | regulated | nr_annotation                                                                               |
|-----------------|---------------|---------------|---------------|----------------|----------------|----------------|-----------|-----------|-----------|---------------------------------------------------------------------------------------------|
| c36972.graph_c0 | 0.03841162    | 0             | 0             | 687.716644     | 814.288698     | 1136.15986     | 8.22E-70  | 15.06588  | up        | chalcone synthase [Misopates orontium]                                                      |
| c36976.graph_c0 | 12.0267499    | 10.9337829    | 13.7376442    | 41.1077618     | 59.4825193     | 63.4389962     | 6.56E-06  | 1.133785  | up        | hypothetical protein MIMGU_mgv1a008959mg [Erythranthe guttata]                              |
| c36981.graph_c0 | 25.9928419    | 26.9650105    | 24.3714545    | 14.6895888     | 21.3774735     | 24.3896713     | 8.007E-22 | -1.379311 | down      | PREDICTED: uncharacterized protein LOC105173636 [Sesamum indicum]                           |
| c36990.graph_c1 | 0             | 0             | 0             | 1.80130504     | 1.4311982      | 1.53600746     | 8.473E-10 | Inf       | up        | NADH dehydrogenase subunit 2 [Amorpharesinae]                                               |
| c36991.graph_c0 | 12.4553961    | 12.6987547    | 11.6189359    | 45.6438992     | 53.3516753     | 50.7481761     | 4.385E-10 | 1.006589  | up        | hypothetical protein CISIN_1g024570mg [Citrus sinensis]                                     |
| c36993.graph_c0 | 3.63666985    | 1.96694246    | 2.78888379    | 0              | 0              | 0              | 1.891E-24 | -Inf      | down      | --                                                                                          |
| c36995.graph_c0 | 0             | 0             | 0             | 0.68554632     | 1.28744885     | 1.19226294     | 1.469E-10 | Inf       | up        | PREDICTED: protein ECEKIFEKUM 5-like [Sesamum indicum]                                      |
| c37003.graph_c0 | 49.5921483    | 54.221855     | 49.1235695    | 38.3448842     | 37.3086334     | 30.610351      | 2.014E-23 | -1.540219 | down      | PREDICTED: BTB/POZ and MATH domain-containing protein 2-like [Sesamum indicum]              |
| c37003.graph_c1 | 29.1925526    | 28.1356651    | 28.483767     | 22.6576704     | 21.2800188     | 21.0077454     | 2.212E-18 | -1.417906 | down      | PREDICTED: BTB/POZ and MATH domain-containing protein 2-like [Sesamum indicum]              |
| c37005.graph_c0 | 12.9191153    | 11.6709096    | 12.1836349    | 9.93467022     | 11.6916604     | 8.3846909      | 1.522E-16 | -1.311176 | down      | PREDICTED: MND1-interacting protein 1-like isoform X2 [Sesamum indicum]                     |
| c37013.graph_c0 | 3.75058623    | 1.62688148    | 2.4098259     | 0              | 0              | 0              | 1.883E-12 | -Inf      | down      | -                                                                                           |
| c37014.graph_c0 | 4.76361864    | 5.0929387     | 5.19200548    | 4.04390519     | 4.77084847     | 5.70403218     | 3.752E-06 | -1.074215 | down      | PREDICTED: putative pentatricopeptide repeat-containing protein At1g26500 [Sesamum indicum] |
| c37020.graph_c0 | 0.28393242    | 0.21316255    | 0.2736483     | 33.7434409     | 37.5482937     | 33.6323311     | 1.116E-59 | 6.069592  | up        | PREDICTED: 7-deoxyloganetin glucosyltransferase-like [Sesamum indicum]                      |
| c37021.graph_c0 | 1.83691161    | 1.99198025    | 1.34885951    | 10.3954514     | 12.3786391     | 12.655748      | 1.866E-15 | 1.757153  | up        | PREDICTED: putative late blight resistance protein homolog R1B-16 [Sesamum indicum]         |
| c37023.graph_c0 | 0.26600159    | 0.17751197    | 0.11394086    | 12.7430169     | 9.9949563      | 11.7020784     | 1.709E-28 | 4.942278  | up        | PREDICTED: bifunctional riboflavin kinase/FMN phosphatase-like isoform X2 [Sesamum indicum] |
| c37025.graph_c0 | 9.5134281     | 7.9357953     | 8.61316101    | 8.69799358     | 6.18987265     | 7.50310415     | 3.051E-05 | -1.230892 | down      | PREDICTED: syntaxin-51-like [Sesamum indicum]                                               |
| c37038.graph_c0 | 0.25122182    | 0.12573669    | 0.08070749    | 1.73581442     | 1.53240408     | 2.36825976     | 1.72E-05  | 2.612715  | up        | -                                                                                           |
| c37038.graph_c1 | 0.72828745    | 0.24300557    | 0.10398647    | 2.46013496     | 2.96160759     | 3.98002417     | 7.599E-05 | 2.11902   | up        | unnamed protein product [Coffea canephora]                                                  |
| c37039.graph_c0 | 2.75929989    | 1.49611741    | 1.9945179     | 0              | 0              | 0              | 1.443E-18 | -Inf      | down      | hyponeucal protein FOR1K_000504750g [Propius trichocarpa]                                   |
| c37041.graph_c0 | 67.1090667    | 63.5866948    | 62.1199475    | 57.7493308     | 49.3608894     | 51.8812964     | 5.952E-20 | -1.292351 | down      | hypothetical protein JCGZ_06000 [Jatropha curcas]                                           |
| c37042.graph_c0 | 0             | 0             | 0.14752383    | 1.21626494     | 1.8486962      | 1.22338505     | 1.717E-08 | 3.806358  | up        | -                                                                                           |
| c37048.graph_c0 | 1.00423355    | 1.03990256    | 1.06798334    | 10.432038      | 11.2880553     | 10.7584594     | 6.851E-15 | 2.364411  | up        | PREDICTED: mannose-6-phosphate isomerase 2-like [Sesamum indicum]                           |
| c37049.graph_c0 | 30.3509647    | 31.4121526    | 31.4106933    | 16.4272569     | 18.7250794     | 17.0604248     | 3.185E-29 | -1.854997 | down      | PREDICTED: uncharacterized protein LOC105155538 isoform X3 [Sesamum indicum]                |
| c37051.graph_c0 | 1.56493984    | 1.38221196    | 0.94635748    | 23.4068238     | 20.7537527     | 21.5064005     | 4.563E-16 | 3.065366  | up        | PREDICTED: transcription repressor ORF1 [Sesamum indicum]                                   |

| #ID             | 0 h-1<br>FPKM | 0 h-2<br>FPKM | 0 h-3<br>FPKM | 48 h-1<br>FPKM | 48 h-2<br>FPKM | 48 h-3<br>FPKM | FDR       | log2FC    | regulated | nr_annotation                                                                                       |
|-----------------|---------------|---------------|---------------|----------------|----------------|----------------|-----------|-----------|-----------|-----------------------------------------------------------------------------------------------------|
| c37056.graph_c0 | 0.45666316    | 0.26121168    | 0             | 1.50252817     | 2.16477512     | 2.03214961     | 0.0009214 | 1.983172  | up        | PREDICTED: AP2-like ethylene-responsive transcription factor At1g16060 isoform X1 [Sesamum indicum] |
| c37057.graph_c0 | 7.94047466    | 7.75917761    | 7.08020463    | 35.2825563     | 42.464949      | 42.0655798     | 5.15E-19  | 1.375271  | up        | hypothetical protein MIMGU_mgv1a003064mg [Erythranthe guttata]                                      |
| c37063.graph_c0 | 0.17172866    | 0.34380124    | 0.1765425     | 30.0278108     | 51.8224812     | 71.2025839     | 3.741E-14 | 6.762867  | up        | PREDICTED: fasciclin-like arabinogalactan protein 8 [Sesamum indicum]                               |
| c37064.graph_c0 | 1.53315439    | 0.98902219    | 0.83184706    | 11.7703485     | 17.8559761     | 19.0193046     | 1.498E-13 | 2.838048  | up        | hypothetical protein MIMGU_mgv1a007836mg [Erythranthe guttata]                                      |
| c37065.graph_c0 | 1.91116503    | 1.70810605    | 1.66651899    | 0.18864534     | 0.13323125     | 0.16785549     | 1.594E-13 | -4.443465 | down      | --                                                                                                  |
| c37067.graph_c0 | 8.36272045    | 6.4243283     | 6.78940923    | 30.7872726     | 40.8404058     | 46.5517616     | 1.247E-08 | 1.431291  | up        | PREDICTED: polyadenylate-binding protein-interacting protein 8-like [Sesamum indicum]               |
| c37072.graph_c0 | 0             | 0             | 0             | 2.18259673     | 2.60122116     | 2.34665758     | 1.122E-11 | Inf       | up        | -                                                                                                   |
| c37074.graph_c0 | 10.3307979    | 11.0275997    | 11.0013115    | 7.7035954      | 6.71449429     | 6.58260441     | 5.09E-22  | -1.638719 | down      | PREDICTED: uncharacterized protein LOC105165632 [Sesamum indicum]                                   |
| c37077.graph_c0 | 0.05061038    | 0.10132213    | 0.06503635    | 15.3864437     | 13.929152      | 13.8982009     | 1.039E-37 | 6.622967  | up        | hypothetical protein MIMGU_mgv1a0032972mg, partial [Erythranthe guttata]                            |
| c37078.graph_c0 | 45.1292829    | 50.4367324    | 43.3387915    | 885.067935     | 943.910509     | 626.800433     | 6.459E-17 | 3.129077  | up        | 3-hydroxy-3-methylglutaryl-coenzyme A reductase [Andrographis paniculata]                           |
| c37079.graph_c0 | 19.780804     | 20.3681449    | 23.3953013    | 104.813377     | 124.563174     | 120.889853     | 7.751E-23 | 1.440407  | up        | PREDICTED: translocon-associated protein subunit beta [Sesamum indicum]                             |
| c37080.graph_c1 | 5.78507286    | 5.85056538    | 5.518056      | 25.1094949     | 27.240739      | 25.0311732     | 3.554E-07 | 1.15567   | up        | PREDICTED: GDSL esterase/lipase CPRD49-like [Sesamum indicum]                                       |
| c37096.graph_c0 | 9.22197731    | 9.32445629    | 8.25951324    | 9.61150853     | 6.90936889     | 5.03972611     | 4.389E-05 | -1.321062 | down      | -                                                                                                   |
| c37104.graph_c0 | 13.75557      | 13.6207541    | 12.6532876    | 77.7977756     | 98.063721      | 102.308194     | 3.169E-28 | 1.775673  | up        | PREDICTED: calcium-transporting ATPase 4, plasma membrane-type-like [Sesamum indicum]               |
| c37111.graph_c0 | 0.57547862    | 1.06482871    | 0.82915073    | 4.75545026     | 4.57829178     | 4.60304553     | 5.69E-07  | 1.478856  | up        | PREDICTED: probable LRR receptor-like serine/threonine-protein kinase At1g67720 [Sesamum indicum]   |
| c37113.graph_c0 | 0.10534813    | 0.08436289    | 0             | 9.68594573     | 7.11490064     | 5.75142136     | 7.136E-16 | 5.900958  | up        | PREDICTED: LOW QUALITY PROTEIN: respiratory burst oxidase homolog protein C-like [Sesamum indicum]  |
| c37117.graph_c0 | 0.38044831    | 0.598446      | 0.41904955    | 14.7207395     | 13.6852665     | 17.5536723     | 1.515E-25 | 4.021839  | up        | PREDICTED: psbP-like protein 1, chloroplastic [Sesamum indicum]                                     |
| c37119.graph_c0 | 2.57804928    | 3.10482143    | 1.91526765    | 21.8951503     | 25.8292944     | 27.3741042     | 2.785E-25 | 2.287794  | up        | PREDICTED: uncharacterized protein LOC105157824 isoform X3 [Sesamum indicum]                        |
| c37122.graph_c0 | 15.3210229    | 14.9801652    | 16.1823653    | 0.30961334     | 0.19293987     | 0.12964333     | 5.7E-218  | -7.205295 | down      | PREDICTED: uncharacterized protein LOC105166759 [Sesamum indicum]                                   |
| c37123.graph_c0 | 0.41352759    | 0.11826905    | 0             | 21.9873298     | 18.8534196     | 16.5617681     | 2.342E-34 | 5.759947  | up        | PREDICTED: phosphonopase D alpha 1-like [Sesamum indicum]                                           |

| #ID             | 0 h-1<br>FPKM | 0 h-2<br>FPKM | 0 h-3<br>FPKM | 48 h-1<br>FPKM | 48 h-2<br>FPKM | 48 h-3<br>FPKM | FDR       | log2FC    | regulated | nr_annotation                                                                                    |
|-----------------|---------------|---------------|---------------|----------------|----------------|----------------|-----------|-----------|-----------|--------------------------------------------------------------------------------------------------|
| c37127.graph_c0 | 0.46082408    | 0.49011587    | 0.55516611    | 3.84740461     | 3.87909308     | 4.69831793     | 6.238E-07 | 2.023404  | up        | PREDICTED: uncharacterized protein LOC105170631 [Sesamum indicum]                                |
| c37135.graph_c0 | 0.14802243    | 0.06350171    | 0             | 2.22084901     | 3.24014979     | 3.9001936      | 3.683E-14 | 4.460797  | up        | hypothetical protein MIMGU_mgv1a001054mg [Erythranthe guttata]                                   |
| c37136.graph_c0 | 361.428755    | 351.449907    | 357.726262    | 51.2585309     | 31.8826423     | 27.1874412     | 5.77E-155 | -4.284786 | down      | PREDICTED: uncharacterized protein LOC105171465 [Sesamum indicum]                                |
| c37138.graph_c0 | 0             | 0             | 0             | 1.85499988     | 1.55574173     | 1.75372822     | 2.736E-12 | Inf       | up        | PREDICTED: probable polygalacturonase At1g80170 [Sesamum indicum]                                |
| c37142.graph_c0 | 0.88301914    | 0.49105742    | 0.50431758    | 0              | 0              | 0              | 7.571E-15 | -Inf      | down      | predicted protein [Hordeum vulgare subsp. vulgare]                                               |
| c37145.graph_c0 | 0.84300135    | 0.25315365    | 0.37915154    | 15.9985334     | 21.5558671     | 26.1212657     | 4.042E-22 | 4.413142  | up        | PREDICTED: ACT domain-containing protein DS12, chloroplastic-like isoform X1 [Sesamum indicum]   |
| c37146.graph_c0 | 4.97232749    | 4.26087604    | 3.43685057    | 51.2220351     | 68.1970581     | 83.9902438     | 4.99E-15  | 2.984121  | up        | PREDICTED: arogenate dehydratase/prephenate dehydratase 6, chloroplastic-like [Sesamum indicum]  |
| c37147.graph_c0 | 7.1172503     | 7.96253917    | 8.37738132    | 4.73858208     | 3.73577907     | 4.65760901     | 1.266E-09 | -1.852893 | down      | conserved hypothetical protein [Ricinus communis]                                                |
| c37149.graph_c0 | 0.46814569    | 0.2677797     | 0.77346739    | 5.88397801     | 7.50614179     | 9.73095564     | 8.312E-12 | 2.905259  | up        | PREDICTED: replication protein A 70 kDa DNA-binding subunit B [Sesamum indicum]                  |
| c37153.graph_c0 | 12.85877      | 12.7120803    | 13.3148164    | 14.4407835     | 12.0571025     | 8.71140497     | 5.424E-12 | -1.154984 | down      | PREDICTED: F-BOX/LKK-repeat protein 10 [Sesamum indicum]                                         |
| c37155.graph_c1 | 29.5413518    | 30.7747055    | 30.8397686    | 177.59868      | 170.335113     | 168.055567     | 3.643E-26 | 1.484133  | up        | PREDICTED: cytochrome c oxidase subunit 6b-1 [Sesamum indicum]                                   |
| c37156.graph_c0 | 1.58653351    | 0.68062379    | 1.45625598    | 33.6172175     | 41.7332608     | 45.5807969     | 1.195E-45 | 3.997664  | up        | hypothetical protein MIMGU_mgv1a016103mg [Erythranthe guttata]                                   |
| c37157.graph_c0 | 28.7792422    | 27.8442218    | 28.0461821    | 1.80697934     | 0.93973525     | 0.76006951     | 1.96E-177 | -5.595378 | down      | PREDICTED: probable protein phosphatase 2C 8 isoform X1 [Sesamum indicum]                        |
| c37160.graph_c0 | 0.23686964    | 0.23710683    | 0.25365572    | 3.12781656     | 2.96677632     | 3.26853894     | 3.652E-07 | 2.667794  | up        | hypothetical protein MIMGU_mgv1a007966mg [Erythranthe guttata]                                   |
| c37161.graph_c0 | 0.06087761    | 0             | 0             | 14.8062883     | 11.1699539     | 8.7331273      | 5.716E-17 | 8.166803  | up        | hypothetical protein MIMGU_mgv1a014011mg [Erythranthe guttata]                                   |
| c37164.graph_c0 | 0             | 0             | 0             | 5.51299072     | 9.1776853      | 7.94211828     | 1.771E-11 | Inf       | up        | PREDICTED: flavonoid 3'-monooxygenase-like, partial [Solanum tuberosum]                          |
| c37173.graph_c0 | 1.89470668    | 1.97788697    | 1.80868859    | 1230.44718     | 1210.39044     | 1453.02534     | 6.42E-278 | 8.402872  | up        | PREDICTED: vignain-like [Sesamum indicum]                                                        |
| c37180.graph_c1 | 3.05762296    | 1.70038039    | 2.61944437    | 20.3441456     | 21.5521555     | 18.3805923     | 0.0001285 | 2.012861  | up        | PREDICTED: LOW QUALITY PROTEIN: protein transport protein SEC31 homolog B-like [Sesamum indicum] |
| c37182.graph_c0 | 326.859368    | 311.578992    | 348.117387    | 160.035555     | 153.013886     | 140.359927     | 3.454E-49 | -2.138337 | down      | hypothetical protein CISIN_1g033114mg [Citrus sinensis]                                          |
| c37184.graph_c0 | 0.04748089    | 0             | 0             | 2.79951932     | 3.56816949     | 4.8263037      | 3.509E-15 | 6.878426  | up        | unnamed protein product [Coffea canephora]                                                       |
| c37190.graph_c0 | 25.8032818    | 26.6355598    | 32.1821264    | 16.6465281     | 14.4224916     | 12.3024348     | 2.212E-17 | -1.979922 | down      | PREDICTED: zinc finger CCCH domain-containing protein 30-like [Sesamum indicum]                  |
| c37191.graph_c0 | 13.4873583    | 11.6429468    | 12.9590903    | 5.69974047     | 6.27971126     | 8.60480584     | 4.477E-31 | -1.909647 | down      | PREDICTED: kinesin-3-like [Sesamum indicum]                                                      |

| #ID             | 0 h-1<br>FPKM | 0 h-2<br>FPKM | 0 h-3<br>FPKM | 48 h-1<br>FPKM | 48 h-2<br>FPKM | 48 h-3<br>FPKM | FDR       | log2FC    | regulated | nr_annotation                                                                     |
|-----------------|---------------|---------------|---------------|----------------|----------------|----------------|-----------|-----------|-----------|-----------------------------------------------------------------------------------|
| c37195.graph_c0 | 10.7141459    | 10.3123793    | 10.061305     | 4.39294599     | 4.71124785     | 6.32166688     | 4.319E-14 | -2.031511 | down      | PREDICTED: ethylene-responsive transcription factor ERF069-like [Sesamum indicum] |
| c37198.graph_c0 | 31.3791121    | 31.8243249    | 34.2386725    | 29.1508313     | 30.0748839     | 26.2462894     | 5.574E-16 | -1.207003 | down      | PREDICTED: uncharacterized protein LOC105173158 [Sesamum indicum]                 |
| c37199.graph_c0 | 4.71465978    | 4.7193808     | 4.66670129    | 31.049813      | 24.3747763     | 22.0919042     | 1.896E-06 | 1.447121  | up        | hypothetical protein M569_02394, partial [Genlisea aurea]                         |
| c37202.graph_c1 | 0.4932154     | 0.49370928    | 0.70836617    | 3.66178591     | 3.11470071     | 3.49606246     | 0.0001205 | 1.579857  | up        | PREDICTED: condensin complex subunit 3 [Sesamum indicum]                          |
| c37204.graph_c0 | 3.61841721    | 3.09455888    | 3.47607109    | 16.6676097     | 14.4001375     | 13.1892785     | 1.209E-06 | 1.104948  | up        | PREDICTED: rab3 GTPase-activating protein non-catalytic subunit [Sesamum indicum] |
| c37208.graph_c0 | 0.28928245    | 0.19304808    | 0             | 4.08642325     | 2.16453496     | 2.92466889     | 6.565E-05 | 3.259979  | up        | hypothetical protein MIMGU_mgv1a022771mg, partial [Erythranthe guttata]           |
| c37212.graph_c1 | 5.43275581    | 6.3861383     | 4.67555377    | 56.9836347     | 60.3186073     | 55.2388366     | 3.106E-41 | 2.371214  | up        | Pollen Ole e 1 allergen and extensin family protein [Theobroma cacao]             |
| c37215.graph_c0 | 29.1000146    | 26.8138398    | 27.3933034    | 22.4318794     | 22.0250375     | 19.4216836     | 3.043E-21 | -1.39885  | down      | PREDICTED: elongator complex protein 3 [Sesamum indicum]                          |
| c37217.graph_c0 | 12.9364216    | 13.1049235    | 11.8812845    | 7.22946194     | 8.68243105     | 8.15237293     | 4.294E-18 | -1.675621 | down      | PREDICTED: IAA-amino acid hydrolase ILR1-like 4 isoform X2 [Sesamum indicum]      |
| c37225.graph_c0 | 0.07869007    | 0.15753772    | 0.15167977    | 6.12577857     | 4.41594529     | 3.58003304     | 1.016E-09 | 4.173252  | up        | PREDICTED: cytochrome P450 714A1-like [Sesamum indicum]                           |
| c37229.graph_c1 | 27.085447     | 30.0051519    | 25.7718636    | 28.4891962     | 23.8668638     | 21.0008539     | 7.74E-15  | -1.187699 | down      | PREDICTED: NAC domain-containing protein 100-like [Sesamum indicum]               |
| c37234.graph_c0 | 22.8842419    | 19.0063006    | 21.309534     | 116.029895     | 126.965674     | 132.740618     | 7.197E-24 | 1.552357  | up        | PREDICTED: 60S ribosomal protein L21-1-like [Sesamum indicum]                     |
| c37236.graph_c0 | 0             | 0             | 0             | 23.0252565     | 24.597446      | 18.077413      | 1.629E-19 | Inf       | up        | -                                                                                 |
| c37239.graph_c0 | 4.89723339    | 4.87428418    | 4.7198541     | 27.4031519     | 28.1884646     | 24.7024902     | 2.193E-17 | 1.453511  | up        | BnaC09g00400D [Brassica napus]                                                    |
| c37240.graph_c0 | 1.34908544    | 1.10035554    | 1.6052113     | 10.4953087     | 11.1185069     | 7.70030071     | 2.006E-07 | 1.835225  | up        | PREDICTED: uncharacterized protein LOC105173599 [Sesamum indicum]                 |
| c37244.graph_c0 | 0.32655398    | 0.14009185    | 0.05994783    | 1.50421412     | 1.86670946     | 2.25622858     | 4.952E-05 | 2.407393  | up        | PREDICTED: F-box/kelch-repeat protein At1g57790-like [Sesamum indicum]            |
| c37246.graph_c0 | 0.27791934    | 0.09273254    | 0.11904578    | 1.2375142      | 1.26578947     | 0.79737195     | 0.002249  | 1.744437  | up        | PREDICTED: ALA-interacting subunit 3-like [Sesamum indicum]                       |
| c37251.graph_c0 | 19.3012341    | 22.3646369    | 19.4594707    | 10.1772248     | 7.38959186     | 10.1748691     | 1.301E-26 | -2.153122 | down      | PREDICTED: uncharacterized protein LOC105176792 [Sesamum indicum]                 |
| c37253.graph_c0 | 19.8458937    | 19.8657664    | 24.4075487    | 84.013592      | 91.2599466     | 89.8255141     | 4.585E-09 | 1.026495  | up        | PREDICTED: uncharacterized protein LOC105167377 [Sesamum indicum]                 |
| c37256.graph_c0 | 6.79662951    | 3.25381689    | 5.69604653    | 0              | 0              | 0              | 6.423E-15 | -Inf      | down      | predicted protein [Hordeum vulgare subsp. vulgare]                                |
| c37266.graph_c0 | 2.61480383    | 2.7076781     | 2.08559573    | 28.4087352     | 19.9757413     | 16.0389153     | 7.852E-05 | 2.114505  | up        | PREDICTED: protein TRANSPORT INHIBITOR RESPONSE 1-like [Sesamum indicum]          |
| c37269.graph_c0 | 1.99189318    | 1.46489713    | 1.72385373    | 12.1338788     | 14.9174209     | 13.9290145     | 2.865E-12 | 1.96343   | up        | PREDICTED: GPN-loop GTPase 2 isoform X1 [Sesamum indicum]                         |

| #ID             | 0 h-1<br>FPKM | 0 h-2<br>FPKM | 0 h-3<br>FPKM | 48 h-1<br>FPKM | 48 h-2<br>FPKM | 48 h-3<br>FPKM | FDR       | log2FC    | regulated | nr_annotation                                                                                     |
|-----------------|---------------|---------------|---------------|----------------|----------------|----------------|-----------|-----------|-----------|---------------------------------------------------------------------------------------------------|
| c37274.graph_c0 | 0.08933512    | 0.17884915    | 0             | 4.44427233     | 2.96440184     | 3.80802432     | 3.109E-09 | 4.389672  | up        | cytochrome P450 CYP72A219-like [Sesamum indicum]                                                  |
| c37276.graph_c1 | 0.06086077    | 0.09138256    | 0.03910425    | 0.58872353     | 1.06916775     | 1.4966933      | 0.0004129 | 3.019295  | up        | PREDICTED: AT-rich interactive domain-containing protein 2 isoform X1 [Nicotiana tomentosiformis] |
| c37277.graph_c0 | 7.38132822    | 5.73881126    | 6.53840999    | 111.377394     | 104.667041     | 106.710422     | 4.928E-88 | 3.021292  | up        | hypothetical protein MIMGU_mgv1a004994mg [Erythranthe guttata]                                    |
| c37279.graph_c0 | 7.88963908    | 7.81352299    | 9.49136038    | 4.948732       | 5.89790418     | 4.40335198     | 3.297E-07 | -1.745176 | down      | -                                                                                                 |
| c37282.graph_c0 | 33.0854992    | 31.7422707    | 30.20305      | 18.2487268     | 18.200052      | 15.9910494     | 1.836E-33 | -1.873281 | down      | hypothetical protein MIMGU_mgv1a011134mg [Erythranthe guttata]                                    |
| c37283.graph_c0 | 3.72411766    | 3.7278468     | 3.50779795    | 2.8560896      | 2.83538624     | 3.37245859     | 9.574E-08 | -1.292017 | down      | PREDICTED: pentatricopeptide repeat-containing protein At3g06920 isoform X2 [Sesamum indicum]     |
| c37288.graph_c0 | 6.72958949    | 5.9675081     | 7.00282908    | 177.568548     | 220.273488     | 251.599845     | 2.656E-48 | 4.01966   | up        | monodehydroascorbate reductase [Acanthus ebracteatus]                                             |
| c37289.graph_c0 | 6.93863421    | 6.50274307    | 7.77942656    | 5.62009554     | 5.24935135     | 5.00072722     | 4.11E-13  | -1.436389 | down      | PREDICTED: uncharacterized protein LOC105168518 isoform X1 [Sesamum indicum]                      |
| c37290.graph_c0 | 85.4188277    | 79.5799022    | 85.7165954    | 46.5676273     | 36.9475271     | 36.6276671     | 4.743E-47 | -2.074308 | down      | hypothetical protein MIMGU_mgv1a012378mg [Erythranthe guttata]                                    |
| c37293.graph_c0 | 3.2043211     | 1.98112131    | 2.66438084    | 18.9277192     | 22.5350813     | 23.2540045     | 2.248E-09 | 2.022928  | up        | PREDICTED: cytochrome P450 734A1 [Sesamum indicum]                                                |
| c37293.graph_c1 | 4.99997804    | 5.30329511    | 4.04232533    | 18.1201702     | 33.1892567     | 38.3537167     | 0.0007424 | 1.617764  | up        | PREDICTED: BTB/POZ domain-containing protein At3g50780-like [Sesamum indicum]                     |
| c37295.graph_c0 | 2.73084264    | 1.98259443    | 1.85102817    | 18.5784396     | 23.6354976     | 20.8359275     | 2.096E-27 | 2.245762  | up        | PREDICTED: ATP-dependent 6-phosphofructokinase 5, chloroplastic-like [Sesamum indicum]            |
| c37299.graph_c0 | 1.65082269    | 2.06559468    | 1.25956493    | 5.75069719     | 11.0766661     | 9.98013921     | 0.0011673 | 1.405072  | up        | PREDICTED: peptide methionine sulfoxide reductase A5 isoform X1 [Sesamum indicum]                 |
| c37303.graph_c0 | 21.0586751    | 20.390881     | 23.9659924    | 11.5389338     | 15.5152054     | 17.1497323     | 1.314E-15 | -1.59056  | down      | PREDICTED: uncharacterized protein LOC105163935 [Sesamum indicum]                                 |
| c37304.graph_c0 | 0             | 0.22251673    | 0.19043784    | 30.991834      | 12.8001761     | 8.92890549     | 0.0003304 | 5.991646  | up        | PREDICTED: uncharacterized protein LOC105169888 [Sesamum indicum]                                 |
| c37307.graph_c0 | 0             | 0.03710522    | 0.04763398    | 0.71714071     | 0.79590094     | 0.69887963     | 1.083E-07 | 3.674386  | up        | PREDICTED: ferric reduction oxidase 7, chloroplastic [Sesamum indicum]                            |
| c37313.graph_c0 | 8.64452375    | 9.18404987    | 7.36026975    | 8.45248189     | 6.46992749     | 5.12990851     | 1.73E-07  | -1.337214 | down      | PREDICTED: C2 and GRAM domain-containing protein At1g03370 isoform X2 [Sesamum indicum]           |
| c37319.graph_c0 | 0.31052036    | 0.36411666    | 0.39903095    | 5.03486025     | 5.50700003     | 6.50180131     | 1.46E-38  | 2.966106  | up        | PREDICTED: sporulation-specific protein 13 [Sesamum indicum]                                      |
| c37321.graph_c1 | 1.60097217    | 1.9910784     | 3.05479752    | 1.2961418      | 1.32575662     | 1.86914005     | 0.0052075 | -1.592715 | down      | PREDICTED: uncharacterized protein LOC105164751 [Sesamum indicum]                                 |
| c37329.graph_c0 | 0.47381605    | 0.62022604    | 0.23418168    | 3.89501452     | 3.66386591     | 3.67490122     | 1.258E-05 | 2.071253  | up        | PREDICTED: E3 ubiquitin-protein ligase RGLG2-like [Sesamum indicum]                               |
| c37333.graph_c0 | 0.39916062    | 0.44656741    | 0.39224609    | 2.70391761     | 2.97905176     | 2.598404       | 5.906E-05 | 1.72424   | up        | PREDICTED: uncharacterized protein LOC105172792, partial [Sesamum indicum]                        |

| #ID             | 0 h-1<br>FPKM | 0 h-2<br>FPKM | 0 h-3<br>FPKM | 48 h-1<br>FPKM | 48 h-2<br>FPKM | 48 h-3<br>FPKM | FDR       | log2FC    | regulated | nr_annotation                                                                 |
|-----------------|---------------|---------------|---------------|----------------|----------------|----------------|-----------|-----------|-----------|-------------------------------------------------------------------------------|
| c37339.graph_c0 | 0.44937542    | 0.2249127     | 0.3849768     | 2.20796772     | 2.11978587     | 2.08742617     | 0.0039528 | 1.581456  | up        | PREDICTED: uncharacterized protein LOC105170136 [Sesamum indicum]             |
| c37340.graph_c0 | 2.01715435    | 1.72126327    | 1.97596277    | 15.4607309     | 29.7399729     | 32.9622626     | 1.106E-06 | 2.744395  | up        | PREDICTED: probable glucan 1,3-alpha-glucosidase [Sesamum indicum]            |
| c37343.graph_c0 | 10.4264017    | 11.1453484    | 9.58523468    | 9.17912836     | 11.0260437     | 11.2247793     | 5.732E-09 | -1.007247 | down      | PREDICTED: uncharacterized protein LOC105164939 [Sesamum indicum]             |
| c37349.graph_c0 | 0.17787149    | 0.1780496     | 0             | 7.18282867     | 6.53882106     | 6.97446858     | 3.111E-25 | 4.862056  | up        | PREDICTED: uncharacterized protein LOC105169807 [Sesamum indicum]             |
| c37350.graph_c0 | 0.07641185    | 0.03824418    | 0.14728837    | 5.70204183     | 5.85418296     | 5.48078668     | 3.133E-19 | 4.995312  | up        | PREDICTED: OTU domain-containing protein DDB_G0284757-like [Sesamum indicum]  |
| c37352.graph_c0 | 14.5202732    | 14.5348131    | 14.3065191    | 5.01318636     | 5.66311419     | 4.64277259     | 1.58E-46  | -2.519257 | down      | hypothetical protein MIMGU_mgv1a003689mg [Erythranthe guttata]                |
| c37358.graph_c0 | 1381.26568    | 1564.69499    | 1419.82621    | 126.540303     | 68.7441512     | 47.8211626     | 2.46E-117 | -5.168044 | down      | hypothetical protein MIMGU_mgv1a011603mg [Erythranthe guttata]                |
| c37361.graph_c0 | 19.3089128    | 21.3015505    | 17.2130108    | 10.260283      | 10.4584242     | 10.5935791     | 4.121E-39 | -1.901218 | down      | PREDICTED: uncharacterized protein LOC105159352 [Sesamum indicum]             |
| c37364.graph_c0 | 8.08760645    | 7.47295843    | 7.46156527    | 2.61097482     | 2.46242462     | 2.71987866     | 1.377E-24 | -2.579211 | down      | PREDICTED: uncharacterized protein LOC105156132 [Sesamum indicum]             |
| c37366.graph_c0 | 0.23917368    | 0.50542781    | 0.71714451    | 6.61027178     | 7.49556974     | 7.90772655     | 8.56E-18  | 2.883858  | up        | hypothetical protein MIMGU_mgv1a005273mg [Erythranthe guttata]                |
| c37371.graph_c0 | 0             | 0             | 0             | 1.73577701     | 1.87289796     | 1.00105441     | 3.29E-10  | Inf       | up        | -                                                                             |
| c37372.graph_c0 | 6.05579039    | 6.27681372    | 6.07100954    | 33.1178289     | 42.084422      | 46.1912485     | 1.941E-17 | 1.699233  | up        | PREDICTED: interactor of constitutive active ROPs 1-like [Sesamum indicum]    |
| c37374.graph_c0 | 1.58615318    | 2.64623578    | 1.92503243    | 0.64945234     | 0.43001        | 0.57787879     | 4.237E-08 | -2.90505  | down      | -                                                                             |
| c37384.graph_c0 | 9.63052192    | 9.59047385    | 8.10155385    | 6.21973212     | 3.87591294     | 4.06932371     | 2.862E-14 | -1.954075 | down      | hypothetical protein MIMGU_mgv1a022389mg [Erythranthe guttata]                |
| c37384.graph_c1 | 14.7307393    | 15.3613949    | 11.3019379    | 9.56966442     | 7.523946       | 6.64587696     | 7.321E-16 | -1.810787 | down      | PREDICTED: ankyrin repeat-containing protein At5g02620-like [Sesamum indicum] |
| c37386.graph_c0 | 0             | 0.66846369    | 2.1453575     | 71.365091      | 89.289349      | 102.640456     | 3.014E-32 | 5.503369  | up        | --                                                                            |
| c37387.graph_c0 | 0.04412318    | 0             | 0             | 33.9826905     | 30.8760612     | 29.5503756     | 2E-101    | 10.06931  | up        | hypothetical protein MIMGU_mgv1a011856mg [Erythranthe guttata]                |
| c37388.graph_c0 | 4.53429769    | 4.52103874    | 4.93560174    | 4.02985699     | 3.31466123     | 3.65862346     | 5.535E-11 | -1.36189  | down      | PREDICTED: uncharacterized protein LOC105155378 [Sesamum indicum]             |
| c37389.graph_c0 | 0.3210305     | 0.49663485    | 0.22502013    | 2.78277846     | 2.7486336      | 2.78710721     | 1.234E-07 | 1.98373   | up        | unnamed protein product [Coffea canephora]                                    |
| c37391.graph_c1 | 17.8745803    | 18.8189504    | 18.7324431    | 119.107629     | 95.5242563     | 107.925427     | 2.388E-14 | 1.526556  | up        | PREDICTED: auxin-induced protein AUX28-like [Sesamum indicum]                 |

| #ID             | 0 h-1<br>FPKM | 0 h-2<br>FPKM | 0 h-3<br>FPKM | 48 h-1<br>FPKM | 48 h-2<br>FPKM | 48 h-3<br>FPKM | FDR       | log2FC    | regulated | nr_annotation                                                                       |
|-----------------|---------------|---------------|---------------|----------------|----------------|----------------|-----------|-----------|-----------|-------------------------------------------------------------------------------------|
| c37394.graph_c0 | 11.0471451    | 9.18226129    | 10.6470141    | 41.9815713     | 44.3781194     | 40.1848701     | 4.745E-06 | 1.017045  | up        | PREDICTED: 20 kDa chaperonin, chloroplastic [Solanum lycopersicum]                  |
| c37395.graph_c0 | 3.85326308    | 2.62985559    | 3.03847912    | 11.5371011     | 14.102492      | 13.855029      | 0.0050577 | 1.032638  | up        | hypothetical protein MIMGU_mgv1a013530mg [Erythranthe guttata]                      |
| c37400.graph_c0 | 1.36499       | 1.58373179    | 1.47501021    | 7.88806635     | 7.05453916     | 6.89160267     | 2.888E-05 | 1.287995  | up        | PREDICTED: aspartic proteinase-like protein 2 [Sesamum indicum]                     |
| c37417.graph_c0 | 1.66005351    | 1.89091798    | 2.05967467    | 10.3362936     | 13.0730186     | 13.4672875     | 3.707E-07 | 1.692621  | up        | PREDICTED: uncharacterized protein LOC105162643 [Sesamum indicum]                   |
| c37423.graph_c0 | 0.86393071    | 0.95679536    | 1.0865642     | 9.85572813     | 10.7997444     | 9.99007446     | 3.486E-25 | 2.3772    | up        | PREDICTED: vacuolar protein sorting-associated protein 18 homolog [Sesamum indicum] |
| c37424.graph_c0 | 20.6869037    | 17.4916626    | 16.1112063    | 98.3225996     | 88.1008257     | 74.9612064     | 5.049E-08 | 1.255531  | up        | hypothetical protein MIMGU_mgv1a016992mg [Erythranthe guttata]                      |
| c37427.graph_c0 | 21.3741468    | 19.7314514    | 25.0251471    | 196.584394     | 211.502295     | 212.687452     | 6.953E-46 | 2.209719  | up        | hypothetical protein MIMGU_mgv1a021808mg [Erythranthe guttata]                      |
| c37428.graph_c0 | 0.9061252     | 0.73696395    | 0.83691736    | 0              | 0.16581561     | 0.16248393     | 3.753E-12 | -3.964016 | down      | -                                                                                   |
| c37432.graph_c0 | 2.55203528    | 2.69919023    | 2.75351421    | 18.8753514     | 17.881395      | 17.130683      | 4.924E-20 | 1.734395  | up        | PREDICTED: uncharacterized protein LOC105168937 [Sesamum indicum]                   |
| c37434.graph_c0 | 8.20562597    | 7.76743817    | 5.38689184    | 3.28676428     | 3.2207836      | 5.70285904     | 7.496E-07 | -1.824541 | down      | PREDICTED: uncharacterized protein LOC105168847 isoform X2 [Sesamum indicum]        |
| c37435.graph_c2 | 0             | 0             | 0             | 1.62814881     | 1.72482624     | 2.19805341     | 1.55E-11  | Inf       | up        | PREDICTED: probable auxin efflux carrier component 1b isoform X2 [Sesamum indicum]  |
| c37435.graph_c3 | 1.33209216    | 1.03232985    | 0.66262884    | 8.03624735     | 9.60381962     | 8.27779346     | 1.795E-08 | 2.08433   | up        | PREDICTED: auxin efflux carrier component 2 [Sesamum indicum]                       |
| c37436.graph_c0 | 3.64172577    | 1.6004074     | 1.99745931    | 0              | 0              | 0              | 5.796E-12 | -Inf      | down      | --                                                                                  |
| c37437.graph_c0 | 9.39612095    | 11.2866357    | 10.4884977    | 8.60463996     | 9.77255088     | 8.09320609     | 2.365E-12 | -1.254785 | down      | PREDICTED: heterogeneous nuclear ribonucleoprotein 1 [Sesamum indicum]              |
| c37439.graph_c1 | 0.83341551    | 1.48973224    | 1.22396792    | 11.4621083     | 11.1550291     | 9.75972734     | 1.178E-08 | 2.172931  | up        | hypothetical protein MIMGU_mgv1a015229mg [Erythranthe guttata]                      |
| c37444.graph_c1 | 11.7362554    | 16.7731668    | 12.2919015    | 9.37474335     | 8.40858858     | 8.67525387     | 8.746E-09 | -1.639413 | down      | PREDICTED: E3 ubiquitin-protein ligase RNF170-like [Sesamum indicum]                |
| c37447.graph_c0 | 18.5128669    | 21.2036997    | 16.6371415    | 11.7988325     | 13.6744471     | 14.8753016     | 1.579E-21 | -1.501161 | down      | PREDICTED: uncharacterized protein LOC105157015 isoform X1 [Sesamum indicum]        |
| c37456.graph_c0 | 8.64740309    | 3.82864287    | 6.62461375    | 0              | 0              | 0              | 1.792E-13 | -Inf      | down      | hypothetical protein TSTA_040370 [Talaromyces stipitatus ATCC 10500]                |
| c37458.graph_c0 | 4.01372903    | 4.11719738    | 3.14064103    | 16.8227453     | 20.9632352     | 20.8650752     | 1.802E-15 | 1.360629  | up        | PREDICTED: probable long-chain-alcohol O-fatty-acyltransferase 5 [Sesamum indicum]  |



| #ID             | 0 h-1<br>FPKM | 0 h-2<br>FPKM | 0 h-3<br>FPKM | 48 h-1<br>FPKM | 48 h-2<br>FPKM | 48 h-3<br>FPKM | FDR       | log2FC    | regulated | nr_annotation                                                                                                   |
|-----------------|---------------|---------------|---------------|----------------|----------------|----------------|-----------|-----------|-----------|-----------------------------------------------------------------------------------------------------------------|
| c37460.graph_c0 | 1.10707358    | 1.07023071    | 0.69182856    | 37.7715389     | 36.6249481     | 40.4400641     | 1.5E-161  | 4.309822  | up        | PREDICTED: acetyl-CoA carboxylase 1-like isoform XI [Sesamum indicum]                                           |
| c37473.graph_c0 | 1.60810108    | 2.53734163    | 2.06647356    | 14.9655358     | 15.2423485     | 12.3108227     | 2.497E-15 | 1.758122  | up        | PREDICTED: uncharacterized protein LOC105162786 [Sesamum indicum]                                               |
| c37475.graph_c0 | 0.35434448    | 0.1182331     | 0.75891114    | 7.50824067     | 11.7581913     | 11.0378227     | 1.393E-10 | 3.583051  | up        | PREDICTED: reticulon-like protein B8 [Sesamum indicum]                                                          |
| c37477.graph_c0 | 0.66450709    | 0.95618546    | 0.96065766    | 3.06093639     | 6.24218007     | 6.6387818      | 0.0018122 | 1.59452   | up        | hypothetical protein MIMGU_mgv1a010755mg [Erythranthe guttata]                                                  |
| c37479.graph_c0 | 1.39530165    | 1.54118492    | 1.73118966    | 0.04432562     | 0.09391523     | 0.39440667     | 6.515E-13 | -4.169534 | down      | hypothetical protein MIMGU_mgv1a022974mg [Erythranthe guttata]                                                  |
| c37480.graph_c0 | 6.91765299    | 6.92457997    | 5.15808055    | 26.0033856     | 29.9229313     | 31.0135602     | 5.692E-10 | 1.176706  | up        | PREDICTED: OUS ribosomal protein L11-like [Sesamum indicum]                                                     |
| c37481.graph_c0 | 0.97053277    | 0.85720995    | 0.917039      | 20.8539897     | 13.7623998     | 12.7994928     | 4.373E-08 | 3.102502  | up        | PREDICTED: uncharacterized protein LOC105162739 [Sesamum indicum]                                               |
| c37483.graph_c0 | 59.6199521    | 57.8878846    | 61.5742993    | 407.693959     | 406.43701      | 396.455278     | 2.384E-35 | 1.739381  | up        | hypothetical protein MIMGU_mgv1a016379mg [Erythranthe guttata]                                                  |
| c37485.graph_c0 | 44.8184972    | 50.0323316    | 45.5885568    | 16.0147474     | 17.0810958     | 16.6409532     | 2E-63     | -2.515766 | down      | PREDICTED: replication protein A 70 kDa DNA-binding subunit A [Sesamum indicum]                                 |
| c37486.graph_c0 | 0.08022014    | 0.08030046    | 0.03436202    | 3.27641163     | 3.28827869     | 2.7180533      | 7.921E-15 | 4.565559  | up        | PREDICTED: nucleobase-ascorbate transporter 1 [Sesamum indicum]                                                 |
| c37489.graph_c0 | 0.14161268    | 0.14175448    | 0.36395579    | 5.21851337     | 4.07718183     | 4.58535929     | 6.369E-09 | 3.397783  | up        | PREDICTED: CASP-like protein 3A1 [Sesamum indicum]                                                              |
| c37490.graph_c0 | 0.76319402    | 0.51949161    | 0.54921134    | 5.7935779      | 6.37594642     | 7.33224077     | 6.294E-11 | 2.394181  | up        | PREDICTED: beta-hexosaminidase 3 [Sesamum indicum]                                                              |
| c37493.graph_c0 | 0             | 0.06917437    | 0.08880288    | 24.7653709     | 21.0764039     | 18.3539571     | 6.121E-46 | 7.640254  | up        | PREDICTED: serine/threonine-protein kinase-like protein CCR1 [Sesamum indicum]                                  |
| c37494.graph_c0 | 14.1052788    | 11.8313975    | 13.1789169    | 8.09051862     | 7.66099664     | 7.91385355     | 7.697E-23 | -1.741473 | down      | hypothetical protein MIMGU_mgv1a003260mg [Erythranthe guttata]                                                  |
| c37495.graph_c0 | 0.73902028    | 0.69624499    | 0.81001292    | 13.5766246     | 19.6437482     | 18.4591347     | 3.701E-32 | 3.49964   | up        | PREDICTED: uncharacterized protein LOC105159731 [Sesamum indicum]                                               |
| c37496.graph_c0 | 1.18280206    | 0.94718917    | 0.70930882    | 4.72192244     | 6.42603701     | 7.3688516      | 1.62E-05  | 1.685767  | up        | hypothetical protein MIMGU_mgv1a012483mg [Erythranthe guttata]                                                  |
| c37503.graph_c0 | 0.0873203     | 0             | 0.05610502    | 432.392731     | 637.076251     | 687.629609     | 8.538E-85 | 12.55577  | up        | PREDICTED: WAT1-related protein At2g39510-like [Sesamum indicum]                                                |
| c37506.graph_c0 | 1.62265211    | 0.84744884    | 1.6318739     | 34.7075148     | 36.9061128     | 35.7404653     | 6.29E-40  | 3.689288  | up        | PREDICTED: cold-regulated 413 plasma membrane protein 2-like [Sesamum indicum]                                  |
| c37508.graph_c0 | 0.1540825     | 0.27762622    | 0             | 4.85471907     | 6.1354923      | 6.84584009     | 1.102E-19 | 4.361182  | up        | PREDICTED: kinesin-4-like [Sesamum indicum]                                                                     |
| c37508.graph_c1 | 0.2172957     | 0.29001772    | 0.23269465    | 6.47271217     | 6.78636241     | 8.87657076     | 7.575E-19 | 3.882709  | up        | PREDICTED: kinesin-4-like [Sesamum indicum]                                                                     |
| c37510.graph_c0 | 1.72032766    | 2.30754741    | 1.5474824     | 9.54096583     | 12.6259756     | 14.4970097     | 1.995E-09 | 1.695958  | up        | PREDICTED: laccase-4-like [Sesamum indicum]                                                                     |
| c37512.graph_c1 | 6.17331981    | 6.14860395    | 6.3067035     | 52.0100372     | 56.9058181     | 53.3882125     | 8.218E-42 | 2.10419   | up        | PREDICTED: dolichyl-diphosphooligosaccharide--protein glycosyltransferase 48 kDa subunit-like [Sesamum indicum] |

| #ID             | 0 h-1<br>FPKM | 0 h-2<br>FPKM | 0 h-3<br>FPKM | 48 h-1<br>FPKM | 48 h-2<br>FPKM | 48 h-3<br>FPKM | FDR       | log2FC    | regulated | nr_annotation                                                                               |
|-----------------|---------------|---------------|---------------|----------------|----------------|----------------|-----------|-----------|-----------|---------------------------------------------------------------------------------------------|
| c37514.graph_c0 | 1.46084451    | 2.05513462    | 1.57282525    | 12.4034165     | 10.8279071     | 11.8456119     | 1.453E-09 | 1.770287  | up        | PREDICTED: uncharacterized protein LOC105161074 [Sesamum indicum]                           |
| c37515.graph_c0 | 4.88266602    | 4.18374731    | 4.54267946    | 19.7562279     | 23.5407286     | 27.7132987     | 6.443E-12 | 1.361787  | up        | PREDICTED: uncharacterized protein LOC105164119 [Sesamum indicum]                           |
| c37516.graph_c0 | 2.25548555    | 2.36787794    | 1.6789444     | 9.4392427      | 12.1204818     | 11.8487644     | 2.617E-14 | 1.387571  | up        | hypothetical protein MIMGU_mgv1a001577mg [Erythranthe guttata]                              |
| c37517.graph_c0 | 0             | 0             | 0             | 0.66123508     | 0.53884491     | 0.56573365     | 1.128E-10 | Inf       | up        | hypothetical protein [Tuber melanosporum Mel28]                                             |
| c37518.graph_c0 | 36.3781275    | 36.9126261    | 38.0088507    | 17.7756116     | 16.9965562     | 15.6353528     | 1.803E-40 | -2.159048 | down      | hypothetical protein MIMGU_mgv1a009711mg [Erythranthe guttata]                              |
| c37520.graph_c0 | 102.078254    | 107.261005    | 101.367731    | 52.1916707     | 54.4574503     | 49.6671634     | 1.847E-40 | -2.008361 | down      | PREDICTED: probable E3 ubiquitin ligase SUD1 [Sesamum indicum]                              |
| c37521.graph_c0 | 1.79678597    | 2.13581991    | 2.54945581    | 10.1732989     | 13.5173876     | 14.9437027     | 2.572E-09 | 1.548841  | up        | PREDICTED: inactive beta-amylase 9 [Sesamum indicum]                                        |
| c37522.graph_c0 | 3.41678101    | 2.16012783    | 3.00416239    | 16.0701509     | 16.8488673     | 20.0482559     | 0.0003006 | 1.606065  | up        | PREDICTED: elongation factor Tu, mitochondrial [Sesamum indicum]                            |
| c37522.graph_c1 | 1.66852606    | 1.27720935    | 1.51349792    | 8.22830049     | 10.6326859     | 9.17197936     | 0.0003148 | 1.631177  | up        | hypothetical protein MIMGU_mgv1a006302mg [Erythranthe guttata]                              |
| c37524.graph_c0 | 24.907545     | 20.8541537    | 25.9619803    | 6.13324305     | 8.79304833     | 7.16166019     | 1.735E-36 | -2.723043 | down      | PREDICTED: uncharacterized protein LOC105159531 [Sesamum indicum]                           |
| c37525.graph_c0 | 11.7932581    | 12.5444242    | 11.1050857    | 7.55313418     | 9.1790468      | 12.5332595     | 1.024E-14 | -1.298738 | down      | PREDICTED: probable protein phosphatase 2C 33 [Sesamum indicum]                             |
| c37526.graph_c0 | 12.0341671    | 11.0155251    | 12.3218866    | 11.1459466     | 8.03933882     | 8.28224793     | 2.655E-08 | -1.376515 | down      | -                                                                                           |
| c37527.graph_c0 | 9.40616473    | 10.6507462    | 9.92977707    | 5.85159087     | 7.08745001     | 7.44526419     | 1.1E-20   | -1.57831  | down      | PREDICTED: uncharacterized protein LOC105178831 [Sesamum indicum]                           |
| c37528.graph_c0 | 0             | 0             | 0             | 2.31613051     | 1.54230021     | 1.2365274      | 7.603E-07 | Inf       | up        | --                                                                                          |
| c37531.graph_c0 | 59.2718691    | 60.1059929    | 60.9333588    | 26.8334399     | 25.325673      | 22.2399601     | 4.887E-56 | -2.292651 | down      | PREDICTED: F-DOX/LRR-repeat protein 14 [Sesamum indicum]                                    |
| c37536.graph_c0 | 3.09622239    | 2.86293377    | 2.89978033    | 20.1121336     | 18.4894193     | 18.4333855     | 1.982E-18 | 1.671325  | up        | PREDICTED: lysM domain receptor-like kinase 3 [Sesamum indicum]                             |
| c37539.graph_c0 | 0.58002341    | 0.77413895    | 0.49690203    | 4.51233445     | 7.73649155     | 9.66781309     | 1.803E-05 | 2.540228  | up        | PREDICTED: growth-regulating factor 3 [Sesamum indicum]                                     |
| c37539.graph_c1 | 15.4605972    | 13.0324873    | 14.116367     | 2.43635575     | 2.77956376     | 2.66812886     | 5.433E-15 | -3.453414 | down      | -                                                                                           |
| c37540.graph_c0 | 1.722227      | 1.72395155    | 2.28690087    | 11.0799511     | 12.6903406     | 12.4706519     | 7.402E-12 | 1.637154  | up        | hypothetical protein MIMGU_mgv1a025916mg, partial [Erythranthe guttata]                     |
| c37541.graph_c0 | 549.678837    | 496.755883    | 524.75179     | 420.005128     | 412.839974     | 356.213281     | 1.45E-20  | -1.417862 | down      | PREDICTED: protein translation factor SUI1 homolog [Nicotiana tomentosiformis]              |
| c37544.graph_c0 | 379.406992    | 354.534787    | 356.753969    | 22.8359436     | 22.9057609     | 19.9591967     | 2.46E-210 | -5.069208 | down      | PREDICTED: uncharacterized GPI-anchored protein At3g06035 [Sesamum indicum]                 |
| c37546.graph_c0 | 7.00358441    | 7.70395323    | 7.34331133    | 29.4424058     | 30.6836464     | 30.2984557     | 8.343E-12 | 1.01763   | up        | PREDICTED: calcium-transporting ATPase 4, endoplasmic reticulum-type-like [Sesamum indicum] |

| #ID             | 0 h-1<br>FPKM | 0 h-2<br>FPKM | 0 h-3<br>FPKM | 48 h-1<br>FPKM | 48 h-2<br>FPKM | 48 h-3<br>FPKM | FDR       | log2FC    | regulated | nr_annotation                                                                                        |
|-----------------|---------------|---------------|---------------|----------------|----------------|----------------|-----------|-----------|-----------|------------------------------------------------------------------------------------------------------|
| c37546.graph_c1 | 6.74675816    | 6.66580604    | 5.29198719    | 27.283859      | 31.640408      | 29.4484485     | 3.344E-06 | 1.223007  | up        | PREDICTED: calcium-transporting ATPase 4, endoplasmic reticulum-type-like [Sesamum indicum]          |
| c37547.graph_c0 | 105.359496    | 113.329673    | 98.6421047    | 88.3005439     | 57.7303418     | 44.170551      | 1.228E-20 | -1.743914 | down      | PREDICTED: F-box protein SKIP2 [Sesamum indicum]                                                     |
| c37548.graph_c0 | 1.61628554    | 1.9985873     | 1.5271992     | 7.79549775     | 8.72233881     | 9.19655808     | 0.0002128 | 1.303646  | up        | PREDICTED: protein-S-isoprenylcysteine O-methyltransferase A isoform X2 [Sesamum indicum]            |
| c37552.graph_c0 | 1.18961132    | 1.16833456    | 1.70175776    | 11.0215102     | 10.4053996     | 9.7700747      | 3.495E-16 | 1.921977  | up        | PREDICTED: uncharacterized protein LOC105164201 isoform X1 [Sesamum indicum]                         |
| c37555.graph_c0 | 24.6451084    | 25.2972646    | 26.4976071    | 20.5466728     | 23.602067      | 21.5276857     | 3.406E-16 | -1.239035 | down      | hypothetical protein M569_08441 [Genlisea aurea]                                                     |
| c37557.graph_c0 | 0.37618014    | 0.25103788    | 0.32227092    | 3.52337709     | 3.42664073     | 3.1864745      | 1.547E-05 | 2.400284  | up        | PREDICTED: cancer-related nucleoside-triphosphatase homolog isoform X1 [Sesamum indicum]             |
| c37559.graph_c0 | 4.8194351     | 4.69503976    | 3.76013584    | 125.587948     | 131.449332     | 140.707191     | 3.99E-128 | 3.888796  | up        | PREDICTED: betaine aldehyde dehydrogenase 1, chloroplastic [Sesamum indicum]                         |
| c37563.graph_c0 | 0             | 0             | 0             | 5.99320925     | 8.56621701     | 8.88786925     | 3.811E-16 | Inf       | up        | hypothetical protein MIMGU_mgv1a018370mg [Erythranthe guttata]                                       |
| c37565.graph_c0 | 0.19413641    | 0.16194234    | 0.2910518     | 5.00783139     | 8.30514884     | 9.17711094     | 2.074E-13 | 4.086726  | up        | PREDICTED: uncharacterized protein LOC105172319 [Sesamum indicum]                                    |
| c37573.graph_c0 | 0.61506506    | 0.41045397    | 0.50057587    | 16.6591587     | 16.1276384     | 18.2685253     | 9.218E-69 | 4.04726   | up        | PREDICTED: putative potassium transporter 12 [Sesamum indicum]                                       |
| c37575.graph_c0 | 23.6741513    | 22.1975614    | 23.4185448    | 13.2116296     | 13.8298949     | 12.7329374     | 2.359E-30 | -1.818614 | down      | hypothetical protein MIMGU_mgv1a005560mg [Erythranthe guttata]                                       |
| c37577.graph_c0 | 0.9835976     | 1.8707068     | 1.39035805    | 0.09061543     | 0.09599606     | 0.16125812     | 3.187E-11 | -4.632432 | down      | PREDICTED: glycerol-3-phosphate acyltransferase 5-like [Sesamum indicum]                             |
| c37578.graph_c0 | 18.8518484    | 20.0154901    | 16.5788799    | 15.6719525     | 14.3005014     | 13.0366387     | 5.469E-22 | -1.379733 | down      | PREDICTED: lysine-specific demethylase JMJ25-like [Sesamum indicum]                                  |
| c37579.graph_c0 | 0             | 0             | 0             | 1.49849569     | 1.34935331     | 2.0666963      | 8.908E-17 | Inf       | up        | PREDICTED: protein STICHEL-like 2 [Sesamum indicum]                                                  |
| c37580.graph_c0 | 50.9575476    | 48.1747642    | 44.4817762    | 2.2524316      | 2.26058984     | 1.95145799     | 1.71E-168 | -5.48864  | down      | PREDICTED: protein PLANT CADMIUM RESISTANCE 2-like [Sesamum indicum]                                 |
| c37581.graph_c0 | 47.0961353    | 44.1759596    | 46.0903576    | 41.2538976     | 46.2134359     | 48.1815717     | 2.676E-13 | -1.038    | down      | PREDICTED: uncharacterized protein LOC105174416 isoform X1 [Sesamum indicum]                         |
| c37584.graph_c0 | 32.6052918    | 35.8628143    | 28.2658262    | 6.03832766     | 8.34846525     | 8.24143256     | 1.1E-63   | -3.117292 | down      | PREDICTED: LOW QUALITY PROTEIN: ethylene-responsive transcription factor ERF061 [Sesamum indicum]    |
| c37587.graph_c0 | 0.38234673    | 0.51941873    | 0.42114059    | 4.88107804     | 5.83726474     | 4.25360432     | 3.176E-10 | 2.482055  | up        | PREDICTED: G-type lectin 5-receptor-like serine/threonine-protein kinase At1g11300 [Sesamum indicum] |
| c37588.graph_c0 | 12.5258256    | 13.3281868    | 11.0265183    | 10.540114      | 7.02686214     | 8.0040903      | 1.919E-07 | -1.537083 | down      | PREDICTED: CBL-interacting serine/threonine-protein kinase 1-like [Sesamum indicum]                  |
| c37590.graph_c0 | 0.03021021    | 0.03024046    | 0.03882132    | 3.28413069     | 3.74449625     | 3.7889539      | 4.861E-18 | 5.744948  | up        | PREDICTED: LOW QUALITY PROTEIN: interactor of constitutive active ROPs 3 [Sesamum indicum]           |

| #ID             | 0 h-1<br>FPKM | 0 h-2<br>FPKM | 0 h-3<br>FPKM | 48 h-1<br>FPKM | 48 h-2<br>FPKM | 48 h-3<br>FPKM | FDR       | log2FC    | regulated | nr_annotation                                                                              |
|-----------------|---------------|---------------|---------------|----------------|----------------|----------------|-----------|-----------|-----------|--------------------------------------------------------------------------------------------|
| c37594.graph_c0 | 0.44419793    | 0.63917392    | 0.60648768    | 0.15345904     | 0.3522377      | 0.52342991     | 0.0007805 | -1.749898 | down      | PREDICTED: beta-xylosidase/alpha-L-arabinofuranosidase 2-like [Sesamum indicum]            |
| c37595.graph_c0 | 1488.66418    | 1562.82425    | 1488.39846    | 67.2423407     | 88.3162126     | 98.6260173     | 1.07E-173 | -5.181712 | down      | hypothetical protein MIMGU_mgv1a00208mg, putative [Cyrus sinensis]                         |
| c37599.graph_c0 | 2.03544939    | 2.95635453    | 2.7182069     | 0.03676841     | 0              | 0              | 9.789E-31 | -8.673981 | down      | -                                                                                          |
| c37600.graph_c0 | 7.88081605    | 7.91111859    | 7.13504499    | 583.073966     | 636.968444     | 702.765967     | 3.34E-201 | 5.371263  | up        | PREDICTED: alpha-L-arabinofuranosidase 1-like [Sesamum indicum]                            |
| c37601.graph_c0 | 10.6611181    | 13.0718757    | 11.7192419    | 5.75891861     | 9.0677403      | 8.73930504     | 1.09E-14  | -1.614643 | down      | PREDICTED: UDP-glycosyltransferase 74F2-like [Sesamum indicum]                             |
| c37602.graph_c0 | 1.18989297    | 0.9966217     | 1.09218541    | 5.83898023     | 9.64588682     | 11.1474104     | 5.348E-06 | 1.995191  | up        | PREDICTED: probable serine/threonine-protein kinase At1g54610 isoform X1 [Sesamum indicum] |
| c37605.graph_c0 | 0.27667303    | 0.43520726    | 0.43172204    | 1.31085895     | 1.96731949     | 1.92779077     | 0.007969  | 1.159157  | up        | PREDICTED: uncharacterized protein LOC105155780 [Sesamum indicum]                          |
| c37606.graph_c0 | 0.13301875    | 0.16643994    | 0.21366796    | 4.96309489     | 4.25167554     | 3.43476932     | 7.967E-13 | 3.606592  | up        | PREDICTED: aspartic proteinase-like protein 1 [Sesamum indicum]                            |
| c37607.graph_c0 | 4.21568496    | 3.49731963    | 4.41548854    | 23.8346062     | 24.4326359     | 24.3085963     | 1.637E-18 | 1.562006  | up        | PREDICTED: protein IQ-DOMAIN 1 [Sesamum indicum]                                           |
| c37608.graph_c0 | 2.74216312    | 3.81237359    | 4.60050123    | 2.73678115     | 4.53478345     | 2.93469375     | 0.0079047 | -1.156615 | down      | PREDICTED: glyoxylate/hydroxypyruvate reductase HPR3-like [Nicotiana tomentosiformis]      |
| c37609.graph_c0 | 3.39339231    | 3.28046185    | 3.07634437    | 1.9913557      | 2.54059343     | 3.14368704     | 1.081E-06 | -1.367634 | down      | PREDICTED: uncharacterized protein LOC105159694 [Sesamum indicum]                          |
| c37612.graph_c0 | 25.1190175    | 27.3367703    | 21.4284893    | 18.7148164     | 23.0327314     | 22.7630125     | 7.734E-16 | -1.214961 | down      | hypothetical protein MIMGU_mgv1a010621mg [Erythranthe guttata]                             |
| c37614.graph_c0 | 0.61995837    | 0.84221458    | 0.62595582    | 7.38410295     | 6.61244167     | 6.93333208     | 1.755E-08 | 2.310802  | up        | PREDICTED: 3-phosphoinositide-dependent protein kinase 2-like [Sesamum indicum]            |
| c37617.graph_c0 | 7.18120744    | 6.93349059    | 6.47932945    | 0.32844381     | 0.7455994      | 1.1689893      | 1.176E-30 | -4.230441 | down      | PREDICTED: uncharacterized protein LOC104880778 [Vitis vinifera]                           |
| c37620.graph_c0 | 0.67753259    | 0.64251572    | 0.59571214    | 27.2999778     | 25.9279868     | 29.0268551     | 3.129E-70 | 4.40798   | up        | -                                                                                          |
| c37621.graph_c0 | 2.97544777    | 2.52227171    | 2.41125922    | 0.56799154     | 0.5755565      | 0.54934289     | 2.849E-17 | -3.239643 | down      | PREDICTED: polyadenylate-binding protein-interacting protein 4-like [Sesamum indicum]      |
| c37623.graph_c0 | 14.4927563    | 11.0531571    | 11.9090746    | 156.405305     | 155.396816     | 166.969873     | 1.19E-58  | 2.659448  | up        | ATP binding protein, putative [Ricinus communis]                                           |
| c37627.graph_c0 | 19.1109789    | 16.4950192    | 14.4977823    | 367.621652     | 446.640272     | 499.601271     | 3.748E-58 | 3.693305  | up        | PREDICTED: low-temperature-induced cysteine proteinase [Sesamum indicum]                   |
| c37629.graph_c0 | 0             | 0             | 0             | 6.67155981     | 7.79885093     | 5.9772539      | 1.851E-23 | Inf       | up        | PREDICTED: hippocampus abundant transcript 1 protein-like isoform X1 [Sesamum indicum]     |
| c37630.graph_c0 | 0.03845902    | 0.11549258    | 0.09884272    | 5.52722893     | 7.46942525     | 6.49440758     | 1.637E-21 | 5.242369  | up        | hypothetical protein MIMGU_mgv1a004581mg [Erythranthe guttata]                             |
| c37632.graph_c0 | 17.6676907    | 18.5985369    | 16.1246383    | 9.98208443     | 11.2834292     | 11.7968814     | 7.737E-30 | -1.68302  | down      | PREDICTED: uncharacterized protein LOC105164604 [Sesamum indicum]                          |

| #ID             | 0 h-1<br>FPKM | 0 h-2<br>FPKM | 0 h-3<br>FPKM | 48 h-1<br>FPKM | 48 h-2<br>FPKM | 48 h-3<br>FPKM | FDR       | log2FC    | regulated | nr_annotation                                                                                                     |
|-----------------|---------------|---------------|---------------|----------------|----------------|----------------|-----------|-----------|-----------|-------------------------------------------------------------------------------------------------------------------|
| c37634.graph_c0 | 0.88851321    | 0.64683849    | 0.72658387    | 9.07853372     | 11.7855086     | 14.0372233     | 5.333E-17 | 2.92531   | up        | PREDICTED: ureidoglycolate hydrolase [Sesamum indicum]                                                            |
| c37636.graph_c0 | 2.26648961    | 2.11229301    | 1.22527077    | 15.5666838     | 23.1423386     | 31.0849857     | 8.988E-07 | 2.617936  | up        | PREDICTED: LRR receptor-like serine/threonine-protein kinase RCH1 [Sesamum indicum]                               |
| c37639.graph_c0 | 1.59698029    | 1.51216972    | 2.1631117     | 0.19881654     | 0.33699523     | 0.17690576     | 2.963E-13 | -3.914207 | down      | PREDICTED: LOW QUALITY PROTEIN: transcription factor GAMYB [Sesamum indicum]                                      |
| c37640.graph_c0 | 3.72685691    | 4.61882422    | 3.02173107    | 45.3293672     | 31.9129427     | 31.0959401     | 1.149E-07 | 2.24547   | up        | hypothetical protein MIMGU_mgv1a011727mg [Erythranthe guttata]                                                    |
| c37641.graph_c0 | 64.0167555    | 57.8258215    | 59.7119228    | 34.4794592     | 39.705871      | 38.9080736     | 7.279E-30 | -1.702449 | down      | PREDICTED: probable protein suoyin 2 [Sesamum indicum]                                                            |
| c37642.graph_c0 | 5.1036899     | 5.35054182    | 5.21365232    | 21.3140737     | 29.5405651     | 38.6297488     | 5.912E-05 | 1.488628  | up        | PREDICTED: LOW QUALITY PROTEIN: uncharacterized protein LOC105173535 [Sesamum indicum]                            |
| c37644.graph_c0 | 28.9225562    | 32.2920775    | 24.5054702    | 20.2036134     | 20.1625089     | 16.4138317     | 1.155E-10 | -1.607938 | down      | PREDICTED: uncharacterized protein LOC102585852 isoform X1 [Solanum tuberosum]                                    |
| c37647.graph_c0 | 3.54267988    | 3.2608987     | 2.61637006    | 15.6434807     | 20.5863025     | 23.065605      | 5.379E-11 | 1.633757  | up        | PREDICTED: acetyl-coenzyme A carboxylase carboxyl transferase subunit alpha, chloroplastic-like [Sesamum indicum] |
| c37648.graph_c0 | 0.12406632    | 0.28386413    | 0.09110294    | 2.31861636     | 4.2725658      | 5.76793722     | 4.56E-06  | 3.60672   | up        | PREDICTED: probable LRR receptor-like serine/threonine-protein kinase At2g24230 [Sesamum indicum]                 |
| c37651.graph_c0 | 3.97891729    | 3.7173748     | 3.54505927    | 32.11099       | 39.2989871     | 38.13971       | 1.069E-27 | 2.264702  | up        | PREDICTED: ras-related protein KABA10 [Sesamum indicum]                                                           |
| c37654.graph_c0 | 0.37448132    | 0.56228446    | 0.42107041    | 7.84867307     | 8.31471741     | 9.01741754     | 7.983E-14 | 3.194287  | up        | Alpha/beta-Hydrolases superfamily protein isoform 1 [Theobroma cacao]                                             |
| c37664.graph_c0 | 17.9047204    | 9.02770482    | 10.0554682    | 0              | 0              | 0              | 1.484E-16 | -Inf      | down      | metalloiononein-like protein type 2 [Narcissus pseudonarcissus]                                                   |
| c37666.graph_c0 | 0.56297104    | 0.81968693    | 0.52613823    | 8.67552704     | 7.89198746     | 8.76826763     | 1.104E-10 | 2.716223  | up        | PREDICTED: beta-galactosidase 9-like [Sesamum indicum]                                                            |
| c37666.graph_c1 | 0.33227813    | 0.20468361    | 0.3612997     | 4.61529174     | 6.06178621     | 5.53141803     | 1.667E-15 | 3.148906  | up        | PREDICTED: beta-galactosidase 9-like [Sesamum indicum]                                                            |
| c37668.graph_c0 | 4.75903982    | 5.31047146    | 5.11300466    | 5.10308181     | 5.63452301     | 4.63662161     | 0.0003265 | -1.000153 | down      | PREDICTED: uncharacterized protein LOC105157340 isoform X2 [Sesamum indicum]                                      |
| c37669.graph_c0 | 1.57992616    | 1.42721474    | 1.93123022    | 11.7152498     | 11.4330592     | 7.99185508     | 5.101E-07 | 1.639662  | up        | PREDICTED: alkylated DNA repair protein alkB homolog 8 [Sesamum indicum]                                          |
| c37670.graph_c0 | 22.5102761    | 22.7994773    | 20.0261049    | 21.6670221     | 14.7638335     | 10.981025      | 1.398E-13 | -1.468445 | down      | PREDICTED: cationic amino acid transporter 1-like isoform X1 [Sesamum indicum]                                    |
| c37671.graph_c0 | 81.6068808    | 78.2675227    | 84.3015049    | 408.315085     | 444.438036     | 468.819482     | 2.022E-24 | 1.416306  | up        | BnaC02g12080D [Brassica napus]                                                                                    |
| c37672.graph_c0 | 2.52881597    | 3.25459054    | 1.85693066    | 1.76392345     | 2.04495197     | 1.59914222     | 3.68E-05  | -1.51306  | down      | PREDICTED: probable serine/threonine-protein kinase At1g18390 isoform X1 [Nicotiana glauca]                       |
| c37673.graph_c0 | 106.354669    | 106.088201    | 105.920549    | 150.194091     | 91.5159084     | 60.7123357     | 0.0002237 | -1.077887 | down      | PREDICTED: ethylene receptor 1 [Sesamum indicum]                                                                  |
| c37673.graph_c1 | 0.2788139     | 0.31397973    | 0.31350104    | 21.0947549     | 19.5241557     | 17.3700937     | 3.747E-58 | 4.983878  | up        | PREDICTED: ethylene receptor 1 [Sesamum indicum]                                                                  |
| c37674.graph_c0 | 6820.08107    | 6352.57917    | 6186.29338    | 1461.44949     | 1321.97182     | 1432.3633      | 2.839E-49 | -3.214433 | down      | 2S albumin precursor isoform 3 [Sesamum indicum]                                                                  |
| c37675.graph_c0 | 1.92646068    | 1.24412241    | 2.23600615    | 11.5074525     | 9.03692454     | 9.52607959     | 5.802E-05 | 1.459196  | up        | hypothetical protein EUGK5U2_B02804 [Eucalyptus grandis]                                                          |

| #ID             | 0 h-1<br>FPKM | 0 h-2<br>FPKM | 0 h-3<br>FPKM | 48 h-1<br>FPKM | 48 h-2<br>FPKM | 48 h-3<br>FPKM | FDR       | log2FC    | regulated | nr_annotation                                                                                                  |
|-----------------|---------------|---------------|---------------|----------------|----------------|----------------|-----------|-----------|-----------|----------------------------------------------------------------------------------------------------------------|
| c37676.graph_c0 | 4.50914426    | 6.53847869    | 4.16982266    | 17.0823536     | 22.6619816     | 23.2832924     | 8.452E-06 | 1.029738  | up        | PREDICTED: cytochrome b561 and DOMON domain-containing protein At5g47530-like [Nicotiana glauca]               |
| c37679.graph_c0 | 0.69448552    | 0.91637488    | 0.6896138     | 0.75613361     | 0.43132486     | 0.72455723     | 0.0088555 | -1.276753 | down      | PREDICTED: uncharacterized protein LOC105042593 [Elaeis guineensis]                                            |
| c37684.graph_c0 | 0.70571057    | 0.57797774    | 0.61831775    | 2.09820043     | 5.60393266     | 5.2590595      | 0.0071842 | 1.736711  | up        | PREDICTED: uncharacterized protein LOC105162014 [Sesamum indicum]                                              |
| c37685.graph_c0 | 240.100628    | 228.699912    | 242.721351    | 148.699308     | 141.449685     | 119.124269     | 9.466E-35 | -1.813266 | down      | PREDICTED: protein DEHYDRATION-INDUCED 19 homolog 3-like isoform X2 [Sesamum indicum]                          |
| c37686.graph_c1 | 72.3527657    | 65.9933744    | 62.5288385    | 338.768309     | 384.817132     | 397.614166     | 2.719E-25 | 1.461836  | up        | PREDICTED: calmodulin-7 isoform X1 [Vitis vinifera]                                                            |
| c37688.graph_c0 | 0             | 0             | 0             | 2.67835114     | 2.93196788     | 2.4626201      | 2.159E-11 | Inf       | up        | -                                                                                                              |
| c37693.graph_c0 | 1.55631132    | 1.3052422     | 1.24319454    | 8.99015986     | 7.67665973     | 8.5855524      | 3.458E-06 | 1.607618  | up        | PREDICTED: uncharacterized protein LOC105162119 isoform X1 [Sesamum indicum]                                   |
| c37694.graph_c0 | 8.1426415     | 8.06705408    | 8.09855266    | 60.0893302     | 82.8715941     | 98.2935596     | 1.1E-11   | 2.286645  | up        | PREDICTED: transcription factor DIVARICATA [Sesamum indicum]                                                   |
| c37697.graph_c0 | 0.90584938    | 0.90675645    | 0.6008012     | 140.68519      | 147.727038     | 147.721052     | 8.34E-257 | 6.483356  | up        | PREDICTED: granule-bound starch synthase 1, chloroplastic/amyloplastic [Sesamum indicum]                       |
| c37698.graph_c0 | 67.4279551    | 57.5471615    | 61.5964174    | 318.553712     | 333.365384     | 330.573482     | 4.532E-23 | 1.378901  | up        | PREDICTED: 40S ribosomal protein S8 [Sesamum indicum]                                                          |
| c37704.graph_c1 | 0             | 0             | 0             | 1.80407712     | 1.88700854     | 1.19886281     | 6.027E-15 | Inf       | up        | --                                                                                                             |
| c37707.graph_c0 | 1.07914519    | 1.02878647    | 0.79242531    | 27.1268824     | 32.5743435     | 35.8900715     | 1.005E-68 | 4.024076  | up        | Dihydrolipoyllysine-residue acetyltransferase component of pyruvate dehydrogenase, putative [Ricinus communis] |
| c37710.graph_c0 | 502.178741    | 501.604659    | 521.849556    | 831.081948     | 422.748819     | 263.728642     | 0.0091863 | -1.007506 | down      | PREDICTED: uncharacterized protein LOC105175543 [Sesamum indicum]                                              |
| c37711.graph_c0 | 2.09139902    | 4.42624284    | 2.76431713    | 0.82574279     | 0.87477436     | 1.51846468     | 0.0001238 | -2.55024  | down      | PREDICTED: telomere repeat-binding protein 5 [Sesamum indicum]                                                 |
| c37711.graph_c1 | 4.51566514    | 4.34498585    | 3.37372587    | 1.25771229     | 2.04983641     | 2.06603969     | 1.192E-11 | -2.210172 | down      | PREDICTED: telomere repeat-binding protein 5 [Sesamum indicum]                                                 |
| c37713.graph_c1 | 3.91029662    | 3.71348336    | 2.89897268    | 2.17068915     | 2.2017274      | 3.49307709     | 0.0001345 | -1.438437 | down      | PREDICTED: phosphoenolpyruvate/phosphate translocator 2, chloroplastic [Sesamum indicum]                       |
| c37714.graph_c0 | 10.2166985    | 9.04119804    | 11.4164017    | 4.77434949     | 6.21392308     | 5.09782496     | 1.065E-06 | -1.953956 | down      | hypothetical protein glysoja_022734 [Glycine soja]                                                             |
| c37717.graph_c0 | 18.8792366    | 18.2802185    | 17.5839529    | 4.54961112     | 5.02058471     | 4.5542437      | 2.973E-46 | -2.972429 | down      | PREDICTED: uncharacterized protein LOC105174387 [Sesamum indicum]                                              |
| c37721.graph_c0 | 47.8418295    | 55.7522298    | 57.6247598    | 30.9182933     | 32.7541827     | 31.1400104     | 1.35E-21  | -1.785434 | down      | -                                                                                                              |
| c37725.graph_c0 | 0.40599132    | 0.40639786    | 0.64211067    | 5.55284282     | 6.27879851     | 7.44972989     | 8.023E-13 | 2.702277  | up        | PREDICTED: uncharacterized protein LOC105169345 [Sesamum indicum]                                              |
| c37726.graph_c0 | 7.57059307    | 8.03591592    | 8.61854739    | 5.89791973     | 7.43825095     | 6.28919016     | 5.633E-07 | -1.325598 | down      | PREDICTED: WPP domain-interacting protein 1 [Sesamum indicum]                                                  |

| #ID             | 0 h-1<br>FPKM | 0 h-2<br>FPKM | 0 h-3<br>FPKM | 48 h-1<br>FPKM | 48 h-2<br>FPKM | 48 h-3<br>FPKM | FDR       | log2FC    | regulated | nr_annotation                                                                                     |
|-----------------|---------------|---------------|---------------|----------------|----------------|----------------|-----------|-----------|-----------|---------------------------------------------------------------------------------------------------|
| c37727.graph_c0 | 0.60325684    | 0.84540528    | 0.15504178    | 4.05704471     | 5.00445875     | 5.34072425     | 3.244E-05 | 2.155986  | up        | PREDICTED: mitochondrial inner membrane protease subunit 2 [Sesamum indicum]                      |
| c37733.graph_c0 | 0.2075223     | 0.15107644    | 0.24243124    | 2.39847859     | 3.03802931     | 3.17029801     | 7.175E-11 | 2.814869  | up        | PREDICTED: protein argonaute 16 isoform X1 [Sesamum indicum]                                      |
| c37734.graph_c0 | 3.19433115    | 2.1604931     | 2.36675574    | 1.45815713     | 1.54474067     | 1.13232824     | 6.681E-08 | -1.915284 | down      | Adenosylhomocysteinase [Rozella allomyces CSF55]                                                  |
| c37737.graph_c0 | 0.19271342    | 0.11574383    | 0.34670212    | 7.52770321     | 7.14712672     | 7.86711395     | 1.33E-19  | 4.078399  | up        | PREDICTED: glucose-6-phosphate 1-dehydrogenase, chloroplastic [Sesamum indicum]                   |
| c37741.graph_c0 | 15.8906927    | 16.2166751    | 16.7182672    | 18.3493682     | 14.6321033     | 11.1471573     | 9.784E-12 | -1.157089 | down      | PREDICTED: sphingoid long-chain bases kinase 1-like [Sesamum indicum]                             |
| c37742.graph_c0 | 1.47448983    | 0.95223633    | 0.97794984    | 0              | 0              | 0              | 8.341E-20 | -Inf      | down      | hypothetical protein WALSLEDRAFT_61591 [Wallemia sebi CBS 633.66]                                 |
| c37744.graph_c0 | 10.9755882    | 12.8017524    | 10.3020999    | 2.02228555     | 1.63006133     | 1.76029975     | 3.189E-43 | -3.666983 | down      | PREDICTED: uncharacterized protein LOC105167616 isoform X1 [Sesamum indicum]                      |
| c37745.graph_c0 | 37.2538958    | 40.8591036    | 34.67465      | 14.180708      | 13.322053      | 13.7000621     | 4.318E-64 | -2.468086 | down      | PREDICTED: U-box domain-containing protein 14 [Sesamum indicum]                                   |
| c37751.graph_c0 | 0.15614381    | 0.10420011    | 0.10032549    | 4.84294548     | 4.49554896     | 4.84254354     | 4.962E-19 | 4.283987  | up        | PREDICTED: proline-rich receptor-like protein kinase PERK10 [Sesamum indicum]                     |
| c37753.graph_c0 | 0.32946337    | 0.17357541    | 0.1559797     | 0.94251924     | 1.21848998     | 1.59200967     | 0.0024828 | 1.491525  | up        | PREDICTED: BTB/POZ domain-containing protein At5g67385 [Sesamum indicum]                          |
| c37754.graph_c0 | 38.7499354    | 40.5537953    | 37.4283009    | 36.1491195     | 35.0818463     | 35.6482436     | 2.988E-16 | -1.143624 | down      | PREDICTED: nucleolar GTP-binding protein 1-like [Sesamum indicum]                                 |
| c37755.graph_c0 | 0.59490187    | 0.92302125    | 0.80269609    | 8.87861103     | 9.11550897     | 9.1192913      | 7.069E-16 | 2.52721   | up        | PREDICTED: uncharacterized protein LOC105157935 [Sesamum indicum]                                 |
| c37758.graph_c0 | 0             | 0             | 0             | 22.241942      | 26.9088144     | 26.4657317     | 2.697E-52 | Inf       | up        | PREDICTED: non-specific phospholipase C6-like [Eucalyptus grandis]                                |
| c37758.graph_c1 | 0.11457534    | 0             | 0             | 16.8359071     | 20.3515962     | 18.3616651     | 4.441E-45 | 7.922365  | up        | PREDICTED: non-specific phospholipase C6 [Sesamum indicum]                                        |
| c37760.graph_c0 | 0.15844967    | 0.23791251    | 0.35632468    | 1.82467719     | 2.28096859     | 1.81841721     | 0.0002133 | 1.94901   | up        | -                                                                                                 |
| c37761.graph_c0 | 10.7545561    | 8.95094452    | 11.1026087    | 64.5676759     | 71.9396384     | 74.8856188     | 1.383E-26 | 1.757723  | up        | unnamed protein product [Triticum aestivum]                                                       |
| c37763.graph_c0 | 0             | 0             | 0.03116116    | 1.16167625     | 1.08865646     | 0.97401874     | 2.623E-11 | 5.645417  | up        | PREDICTED: probable membrane-associated kinase regulator 4 [Sesamum indicum]                      |
| c37764.graph_c0 | 1.16043173    | 2.01750489    | 1.49120071    | 857.559248     | 555.066342     | 813.016613     | 4.024E-42 | 7.884455  | up        | PREDICTED: acid phosphatase 1-like [Camelina sativa]                                              |
| c37767.graph_c0 | 47.2597556    | 45.3227218    | 47.7897285    | 18.5551131     | 17.7995483     | 16.2827249     | 1.664E-59 | -2.43129  | down      | PREDICTED: U-box domain-containing protein 4-like [Sesamum indicum]                               |
| c37770.graph_c0 | 5.7610432     | 6.8537504     | 5.69772662    | 2.33416595     | 3.4147718      | 4.27748024     | 2.647E-14 | -1.89393  | down      | PREDICTED: pentatricopeptide repeat-containing protein At3g48250, chloroplastic [Sesamum indicum] |
| c37772.graph_c0 | 21.0443411    | 18.507643     | 18.8649166    | 24.9615803     | 14.9628436     | 11.1646132     | 8.488E-06 | -1.197004 | down      | PREDICTED: histone-lysine N-methyltransferase setd3 [Sesamum indicum]                             |

| #ID             | 0 h-1<br>FPKM | 0 h-2<br>FPKM | 0 h-3<br>FPKM | 48 h-1<br>FPKM | 48 h-2<br>FPKM | 48 h-3<br>FPKM | FDR       | log2FC    | regulated | nr_annotation                                                                                                       |
|-----------------|---------------|---------------|---------------|----------------|----------------|----------------|-----------|-----------|-----------|---------------------------------------------------------------------------------------------------------------------|
| c37774.graph_c0 | 33.5319755    | 30.3475503    | 33.2784971    | 163.015145     | 148.72755      | 162.764796     | 5.352E-20 | 1.27138   | up        | PREDICTED: cysteine proteinase inhibitor A-like [Nicotiana sylvestris]                                              |
| c37775.graph_c0 | 191.417992    | 192.68639     | 195.677962    | 92.2448986     | 82.5458907     | 82.2514714     | 1.658E-45 | -2.188914 | down      | PREDICTED: acetate/butyrate--CoA ligase AAE7, peroxisomal [Sesamum indicum]                                         |
| c37776.graph_c0 | 1.28799006    | 1.38845516    | 0.9548759     | 6.06981541     | 9.62117632     | 8.36528091     | 1.031E-05 | 1.706371  | up        | PREDICTED: GDSL esterase/lipase At2g04570-like [Sesamum indicum]                                                    |
| c37780.graph_c0 | 12.3177879    | 12.3113263    | 11.1236244    | 7.40384517     | 8.08171262     | 8.66585505     | 1.33E-23  | -1.584465 | down      | PREDICTED: AP-3 complex subunit delta isoform X1 [Sesamum indicum]                                                  |
| c37786.graph_c0 | 3.80051131    | 3.62940583    | 3.36814311    | 11.0672609     | 15.8173097     | 19.1222142     | 0.0005742 | 1.067087  | up        | PREDICTED: THO complex subunit 1A [Sesamum indicum]                                                                 |
| c37787.graph_c0 | 0             | 0             | 0             | 1.30094266     | 1.89884094     | 1.36336135     | 5.213E-13 | Inf       | up        | --                                                                                                                  |
| c37795.graph_c0 | 0             | 0             | 0             | 2.00360107     | 2.24271799     | 2.35463118     | 1.262E-13 | Inf       | up        | PREDICTED: putative late blight resistance protein homolog R1B-16 [Sesamum indicum]                                 |
| c37803.graph_c0 | 0.46527115    | 0.36985001    | 0.29894593    | 3.85774319     | 4.34056738     | 4.92454232     | 3.704E-16 | 2.515744  | up        | PREDICTED: LOW QUALITY PROTEIN: LRR receptor-like serine/threonine-protein kinase RCH1 [Sesamum indicum]            |
| c37804.graph_c0 | 147.625928    | 129.726671    | 142.60595     | 20.9475321     | 17.4715639     | 17.9087292     | 3.66E-146 | -3.912438 | down      | PREDICTED: SPX domain-containing protein 1-like [Sesamum indicum]                                                   |
| c37807.graph_c0 | 28.2497598    | 28.5007095    | 29.5847495    | 12.6029099     | 15.4679173     | 14.7240646     | 3.009E-32 | -2.033894 | down      | PREDICTED: pollen-specific leucine-rich repeat extensin-like protein 1 [Nicotiana sylvestris]                       |
| c37809.graph_c1 | 2.43424903    | 2.7248968     | 3.12810638    | 21.7989295     | 18.4184574     | 19.3751        | 5.667E-21 | 1.829341  | up        | PREDICTED: CBL-interacting serine/threonine-protein kinase 3 isoform X1 [Sesamum indicum]                           |
| c37812.graph_c0 | 0.22038068    | 0.11030068    | 0.2831979     | 3.29922215     | 3.65643932     | 3.16144557     | 1.327E-07 | 3.018933  | up        | PREDICTED: AMSH-like ubiquitin thioesterase 2 isoform X2 [Sesamum indicum]                                          |
| c37818.graph_c0 | 0             | 0             | 0             | 0.65635486     | 1.13448316     | 1.01435159     | 1.252E-11 | Inf       | up        | PREDICTED: phosphoinositide phospholipase C 6-like [Sesamum indicum]                                                |
| c37826.graph_c0 | 1.23976729    | 2.1510818     | 1.27452004    | 20.1019191     | 26.9017595     | 28.8285384     | 1.709E-25 | 3.001543  | up        | PREDICTED: UDP-N-acetylglucosamine--donor--phosphate N-acetylglucosaminophosphotransferase-like [Sesamum indicum]   |
| c37828.graph_c0 | 47.1714843    | 44.257978     | 50.2413035    | 5.68470402     | 6.13838623     | 5.57379113     | 6.49E-150 | -4.044768 | down      | PREDICTED: uncharacterized protein LOC105157890 [Sesamum indicum]                                                   |
| c37829.graph_c0 | 0.31868284    | 0.27912671    | 0.23035504    | 9.08298451     | 10.7109065     | 11.4453969     | 1.017E-46 | 4.219246  | up        | PREDICTED: uncharacterized aarF domain-containing protein kinase At1g79600, chloroplastic [Sesamum indicum]         |
| c37835.graph_c0 | 105.53838     | 105.748638    | 106.434692    | 71.3768632     | 81.4269743     | 75.0549901     | 4.619E-24 | -1.49904  | down      | PREDICTED: DEAD-box ATP-dependent RNA helicase 38 [Sesamum indicum]                                                 |
| c37837.graph_c1 | 0.89538416    | 0.30729626    | 0.49311604    | 10.8649309     | 15.9043795     | 15.5184102     | 2.702E-26 | 3.619796  | up        | PREDICTED: serine/threonine protein phosphatase 2A 31 kDa regulatory subunit B&apos; iota isoform [Sesamum indicum] |
| c37842.graph_c0 | 38.6688887    | 41.8115218    | 38.4402485    | 172.800272     | 233.143084     | 299.040473     | 7.062E-06 | 1.543371  | up        | --                                                                                                                  |
| c37845.graph_c0 | 22.0777098    | 21.0817161    | 18.3654852    | 15.5413249     | 13.9483177     | 12.6929666     | 7.469E-28 | -1.557256 | down      | PREDICTED: retinoblastoma-related protein [Sesamum indicum]                                                         |



| #ID             | 0 h-1<br>FPKM | 0 h-2<br>FPKM | 0 h-3<br>FPKM | 48 h-1<br>FPKM | 48 h-2<br>FPKM | 48 h-3<br>FPKM | FDR       | log2FC    | regulated | nr_annotation                                                                               |
|-----------------|---------------|---------------|---------------|----------------|----------------|----------------|-----------|-----------|-----------|---------------------------------------------------------------------------------------------|
| c37849.graph_c0 | 905.230238    | 914.777562    | 981.434342    | 57.3608814     | 47.2538751     | 51.2145196     | 4.53E-167 | -5.183217 | down      | hypothetical protein MIMGU_mgv1a008920mg [Erythranthe guttata]                              |
| c37852.graph_c0 | 4.87825295    | 4.15232805    | 5.03205636    | 39.4080165     | 28.9871788     | 22.8779508     | 0.0001883 | 1.688131  | up        | beta-D-xylosidase family protein [Populus trichocarpa]                                      |
| c37854.graph_c0 | 0.50872867    | 0.44932773    | 0.36532333    | 8.17422659     | 8.17770162     | 7.7026664      | 1.489E-34 | 3.170085  | up        | PREDICTED: uncharacterized protein LOC105166467 isoform X1 [Sesamum indicum]                |
| c37856.graph_c0 | 40.3831501    | 40.113489     | 40.3208857    | 33.6565097     | 33.2362393     | 30.4915276     | 3.869E-21 | -1.327585 | down      | PREDICTED: VHS domain-containing protein At3g16270 [Sesamum indicum]                        |
| c37858.graph_c0 | 8.86561839    | 9.212572      | 8.46312675    | 7.23414753     | 5.76837794     | 5.39869114     | 1.706E-06 | -1.540107 | down      | PREDICTED: kxDL motif-containing protein 1 [Sesamum indicum]                                |
| c37863.graph_c0 | 0.04137016    | 0.08282317    | 0.05316229    | 3.27770845     | 2.82631891     | 4.40864052     | 2.492E-13 | 4.871463  | up        | PREDICTED: uncharacterized protein LOC105168997 [Sesamum indicum]                           |
| c37867.graph_c0 | 5.67617404    | 5.09910322    | 3.86525401    | 0.08938909     | 0.14204535     | 0.11930681     | 7.133E-37 | -6.404476 | down      | PREDICTED: uncharacterized protein LOC105158642 [Sesamum indicum]                           |
| c37868.graph_c0 | 0.06329101    | 0             | 0             | 4.8103938      | 4.72540866     | 6.07018617     | 2.015E-24 | 6.948087  | up        | Nucleobase-ascorbate transporter 7 [Theobroma cacao]                                        |
| c37870.graph_c0 | 4.93389022    | 4.29678277    | 4.69178076    | 1.13635537     | 2.8169639      | 2.95247675     | 7.906E-15 | -2.043608 | down      | PREDICTED: putative pentatricopeptide repeat-containing protein At5g43820 [Sesamum indicum] |
| c37873.graph_c0 | 1.54552928    | 1.38249424    | 1.43672882    | 13.9960676     | 13.9606156     | 14.7179108     | 1.537E-18 | 2.27201   | up        | PREDICTED: oxygen-evolving enhancer protein 1, chloroplastic-like [Nicotiana glauca]        |
| c37874.graph_c0 | 4.31565832    | 3.51626263    | 3.67569922    | 114.28303      | 81.300389      | 62.7736354     | 2.086E-08 | 3.481379  | up        | PREDICTED: aspartic proteinase-like protein 1 isoform X1 [Sesamum indicum]                  |
| c37877.graph_c0 | 43.0877936    | 24.3011224    | 26.8181863    | 0              | 0              | 0              | 2.411E-31 | -Inf      | down      | hypothetical protein SELMODRAFT_140819 [Selaginella moellendorffii]                         |
| c37878.graph_c0 | 21.499304     | 24.4615671    | 21.5642882    | 19.2734653     | 20.3744571     | 21.4914991     | 1.006E-12 | -1.161731 | down      | hypothetical protein MIMGU_mgv1a013275mg [Erythranthe guttata]                              |
| c37880.graph_c0 | 64.6268924    | 64.6916065    | 71.5000047    | 347.484116     | 348.709954     | 360.337689     | 3.153E-23 | 1.376516  | up        | elongation factor-like protein [Solanum tuberosum]                                          |
| c37881.graph_c1 | 157.250435    | 162.222933    | 179.707888    | 59.9459409     | 119.755584     | 188.910863     | 8.27E-07  | -1.470112 | down      | heat shock protein 70 [Suaeda frutescens]                                                   |
| c37881.graph_c2 | 21.9345614    | 24.5703976    | 30.8712351    | 6.73584955     | 14.7813328     | 26.114616      | 0.000136  | -1.73622  | down      | 70 kD heatshockprotein [Medicago sativa]                                                    |
| c37883.graph_c0 | 10.1072245    | 10.9949946    | 8.70051823    | 40.297196      | 43.973545      | 40.7674643     | 2.4E-12   | 1.05222   | up        | PREDICTED: uncharacterized protein LOC105172480 [Sesamum indicum]                           |
| c37887.graph_c0 | 18.7813448    | 21.029819     | 18.0197621    | 13.3617112     | 13.586932      | 14.0263161     | 2.242E-23 | -1.514197 | down      | PREDICTED: zinc finger Ran-binding domain-containing protein 2 isoform X1 [Sesamum indicum] |
| c37888.graph_c0 | 17.7056823    | 19.0277322    | 12.410456     | 1.90655408     | 2.24418096     | 2.82740059     | 5.54E-24  | -3.83443  | down      | PREDICTED: myb-related protein sub-like [Sesamum indicum]                                   |
| c37890.graph_c0 | 39.8098354    | 39.8496989    | 36.5630472    | 25.4891365     | 24.8801704     | 28.2263009     | 1.448E-23 | -1.581403 | down      | PREDICTED: probable acetyltransferase NATA1-like [Sesamum indicum]                          |
| c37891.graph_c0 | 0.02624142    | 0.07880308    | 0.10116378    | 5.80207324     | 6.940528       | 7.03411047     | 1.031E-30 | 5.553757  | up        | PREDICTED: receptor-like serine/threonine-protein kinase NCRK isoform X1 [Sesamum indicum]  |

| #ID             | 0 h-1<br>FPKM | 0 h-2<br>FPKM | 0 h-3<br>FPKM | 48 h-1<br>FPKM | 48 h-2<br>FPKM | 48 h-3<br>FPKM | FDR       | log2FC    | regulated | nr_annotation                                                                                        |
|-----------------|---------------|---------------|---------------|----------------|----------------|----------------|-----------|-----------|-----------|------------------------------------------------------------------------------------------------------|
| c37892.graph_c0 | 2.56655709    | 2.47031452    | 2.9175743     | 1.45506449     | 1.83048896     | 0.80919227     | 6.605E-05 | -1.976519 | down      | PREDICTED: serine/threonine-protein kinase BLUS1-like isoform X2 [Sesamum indicum]                   |
| c37893.graph_c0 | 0.28549307    | 0.50805146    | 0.7337398     | 5.90322191     | 5.51072827     | 6.29278034     | 5.351E-11 | 2.510199  | up        | PREDICTED: riboflavin biosynthesis protein PYRD, chloroplastic [Sesamum indicum]                     |
| c37895.graph_c0 | 11.3090435    | 12.4943319    | 8.82718985    | 4.63050156     | 7.93048547     | 12.4292472     | 9.375E-06 | -1.41128  | down      | -                                                                                                    |
| c37899.graph_c0 | 0.11160091    | 0.13405519    | 0.02868232    | 0.49350738     | 1.39416327     | 1.82966625     | 0.0078864 | 2.736804  | up        | PREDICTED: G-type lectin 5-receptor-like serine/threonine-protein kinase At1g34300 [Sesamum indicum] |
| c37902.graph_c0 | 18.9312674    | 21.0384032    | 18.831976     | 13.0685272     | 11.961258      | 13.039083      | 2.779E-19 | -1.643152 | down      | PREDICTED: small nuclear ribonucleoprotein-associated protein N-like [Sesamum indicum]               |
| c37905.graph_c0 | 2.95536001    | 2.23872816    | 3.38718656    | 11.8472956     | 15.5910225     | 13.6845052     | 0.000355  | 1.236415  | up        | PREDICTED: uncharacterized protein LOC104093968 [Nicotiana tomentosiformis]                          |
| c37906.graph_c0 | 7.41778373    | 6.69800008    | 6.43665513    | 84.1537096     | 60.6776721     | 51.089798      | 2.043E-06 | 2.244728  | up        | PREDICTED: protein TRANSPORT INHIBITOR RESPONSE 1-like [Sesamum indicum]                             |
| c37907.graph_c0 | 20.9241907    | 21.2702341    | 21.4630352    | 94.289279      | 98.5296528     | 95.2695258     | 8.154E-16 | 1.159889  | up        | PREDICTED: coatomer subunit delta-2-like [Sesamum indicum]                                           |
| c37908.graph_c0 | 0.64828552    | 0.58404121    | 0.54149716    | 2.12021232     | 2.799726       | 2.69697247     | 0.003096  | 1.081596  | up        | PREDICTED: pentatricopeptide repeat-containing protein ELI1, chloroplastic [Sesamum indicum]         |
| c37909.graph_c0 | 9.41483184    | 8.64700086    | 7.82656275    | 50.9906802     | 55.2262203     | 53.1087705     | 1.148E-27 | 1.604617  | up        | PREDICTED: UDP-sugar pyrophosphorylase [Sesamum indicum]                                             |
| c37914.graph_c0 | 0             | 0             | 0             | 2.1983991      | 4.52848915     | 6.23061177     | 1.432E-08 | Inf       | up        | PREDICTED: geraniol synthase, chloroplastic-like [Sesamum indicum]                                   |
| c37916.graph_c0 | 92.6675273    | 94.2689492    | 97.8823277    | 31.0714262     | 38.7602636     | 35.6608402     | 1.019E-64 | -2.454415 | down      | PREDICTED: protein DJ-1 homolog B [Sesamum indicum]                                                  |
| c37918.graph_c0 | 32.7384782    | 34.5541533    | 33.4600101    | 14.4162476     | 15.6033723     | 18.4590716     | 5.42E-40  | -2.075633 | down      | hypothetical protein MIMGU_mgv1a008971mg [Erythranthe guttata]                                       |
| c37919.graph_c0 | 0.03302333    | 0.09916919    | 0.29705399    | 5.47618388     | 6.92939362     | 7.30901323     | 5.747E-22 | 4.48089   | up        | PREDICTED: uncharacterized protein LOC104231484 isoform X1 [Nicotiana glauca]                        |
| c37920.graph_c0 | 0.46892763    | 0.19558216    | 0.35151116    | 2.80804366     | 2.89850531     | 2.11418338     | 0.0001609 | 1.929277  | up        | PREDICTED: squamosa promoter-binding-like protein 16 isoform X1 [Nicotiana tomentosiformis]          |
| c37921.graph_c0 | 13.9914072    | 15.0682232    | 14.1592449    | 7.08612783     | 8.56614807     | 6.13112416     | 8.23E-35  | -2.007036 | down      | PREDICTED: uncharacterized protein LOC105178567 [Sesamum indicum]                                    |
| c37922.graph_c0 | 0.25773499    | 0.42998845    | 0.22079978    | 2.84930738     | 3.68927248     | 3.0282709      | 5.399E-05 | 2.379074  | up        | PREDICTED: peptidyl-prolyl cis-trans isomerase FKBP18, chloroplastic [Sesamum indicum]               |
| c37924.graph_c0 | 61.5983715    | 65.247547     | 58.8795286    | 46.9349704     | 55.405802      | 58.8795523     | 4.046E-18 | -1.224407 | down      | PREDICTED: Ia-related protein 1B [Sesamum indicum]                                                   |
| c37926.graph_c0 | 1.5109383     | 1.47727799    | 1.62553858    | 10.5531121     | 11.5226795     | 11.6656097     | 5.518E-11 | 1.850421  | up        | PREDICTED: uncharacterized protein C630.12 isoform X1 [Sesamum indicum]                              |
| c37927.graph_c0 | 7.06482747    | 7.18460145    | 7.19776103    | 37.4956434     | 43.1009374     | 40.4929208     | 1.744E-21 | 1.477466  | up        | PREDICTED: sphingosine-1-phosphatase [Sesamum indicum]                                               |
| c37930.graph_c0 | 1.81476984    | 1.68835738    | 1.28948707    | 0.94412292     | 1.37525267     | 1.12009987     | 3.736E-05 | -1.498327 | down      | PREDICTED: U-box domain-containing protein 52-like [Sesamum indicum]                                 |

| #ID             | 0 h-1<br>FPKM | 0 h-2<br>FPKM | 0 h-3<br>FPKM | 48 h-1<br>FPKM | 48 h-2<br>FPKM | 48 h-3<br>FPKM | FDR       | log2FC    | regulated | nr_annotation                                                                                     |
|-----------------|---------------|---------------|---------------|----------------|----------------|----------------|-----------|-----------|-----------|---------------------------------------------------------------------------------------------------|
| c37932.graph_c0 | 43.620691     | 45.3524261    | 41.5206447    | 26.9496287     | 36.9107386     | 40.4022458     | 1.451E-21 | -1.346845 | down      | PREDICTED: serine/threonine-protein kinase WNK8-like isoform X1 [Sesamum indicum]                 |
| c37933.graph_c0 | 119.012437    | 121.993927    | 117.457654    | 43.1936871     | 43.6894789     | 40.0904471     | 2.184E-68 | -2.514042 | down      | PREDICTED: protein PPLZ12 [Sesamum indicum]                                                       |
| c37934.graph_c1 | 37.8179274    | 33.1704678    | 34.7581486    | 32.0928008     | 33.392038      | 30.4234948     | 4.276E-15 | -1.157927 | down      | hypothetical protein MIMGU_mgv1a007540mg [Erythranthe guttata]                                    |
| c37935.graph_c0 | 1.1858099     | 1.02659227    | 1.11197141    | 0.91529211     | 0.8132473      | 0.97205137     | 0.0005331 | -1.31622  | down      | PREDICTED: uncharacterized protein LOC105178399 [Sesamum indicum]                                 |
| c37936.graph_c0 | 0.11044925    | 0.38695946    | 0.21289748    | 1.83155491     | 1.67082279     | 2.30875094     | 0.0003564 | 2.013749  | up        | -                                                                                                 |
| c37937.graph_c0 | 1.72103201    | 0.77934171    | 1.05314013    | 0              | 0              | 0              | 1.269E-11 | -Inf      | down      | Mitochondrial uncoupling protein 3 [Aegilops tauschii]                                            |
| c37938.graph_c1 | 0             | 0             | 0             | 4.50833594     | 4.02735946     | 4.57526721     | 4.039E-27 | Inf       | up        | PREDICTED: chromosome-associated kinesin KIF4A [Sesamum indicum]                                  |
| c37943.graph_c1 | 4.81558472    | 5.28390745    | 3.86763564    | 1.66366153     | 2.25954828     | 2.54310701     | 6.953E-10 | -2.132214 | down      | hypothetical protein MIMGU_mgv1a008064mg [Erythranthe guttata]                                    |
| c37947.graph_c0 | 0.46530971    | 0.98330414    | 0.5979414     | 4.15972213     | 4.37308211     | 4.97273321     | 3.54E-08  | 1.703736  | up        | PREDICTED: pentatricopeptide repeat-containing protein At5g57250, mitochondrial [Sesamum indicum] |
| c37953.graph_c0 | 127.815646    | 127.108393    | 128.669186    | 47.5900217     | 60.2251101     | 61.9945363     | 7.587E-52 | -2.197748 | down      | PREDICTED: uncharacterized protein LOC105167724 [Sesamum indicum]                                 |
| c37954.graph_c0 | 1.97482734    | 2.56012428    | 1.66408611    | 14.3161161     | 14.2498985     | 12.738394      | 4.206E-12 | 1.722457  | up        | PREDICTED: O-acyltransferase WSD1-like isoform X1 [Sesamum indicum]                               |
| c37960.graph_c0 | 1043.70309    | 1022.36532    | 1039.80801    | 12.8863089     | 11.6326006     | 6.05607051     | 0         | -7.67734  | down      | hypothetical protein MIMGU_mgv1a009609mg [Erythranthe guttata]                                    |
| c37964.graph_c0 | 346.864251    | 338.928495    | 364.522104    | 57.7319189     | 83.8765271     | 95.0831859     | 3.539E-91 | -3.175346 | down      | uncharacterized LOC102580903 [Solanum tuberosum]                                                  |
| c37966.graph_c0 | 4.23292668    | 2.93342214    | 3.48684511    | 0.29997293     | 0.6355699      | 0.97868508     | 1.574E-14 | -3.50744  | down      | -                                                                                                 |
| c37968.graph_c0 | 54.1024366    | 50.5752096    | 49.4556955    | 18.0841229     | 19.5826187     | 20.41118       | 5.642E-58 | -2.426644 | down      | BnaC06g30860D [Brassica napus]                                                                    |
| c37969.graph_c0 | 0.21115021    | 0.04696926    | 0.09044546    | 2.35591812     | 1.4196348      | 2.44245674     | 1.345E-07 | 3.15035   | up        | PREDICTED: uncharacterized protein At5g41620 [Sesamum indicum]                                    |
| c37971.graph_c0 | 46.3680145    | 48.7252638    | 44.4978457    | 26.5539596     | 22.9165431     | 23.7897564     | 6.347E-35 | -1.944272 | down      | PREDICTED: protein vip1-like [Sesamum indicum]                                                    |
| c37977.graph_c0 | 11.6354543    | 10.7115949    | 11.6493645    | 74.1743846     | 98.0068305     | 81.6284576     | 1.463E-26 | 1.87858   | up        | PREDICTED: glutathione S-transferase L3-like [Malus domestica]                                    |
| c37980.graph_c0 | 0.95162421    | 1.25339095    | 1.22287479    | 17.0264037     | 15.7399623     | 14.287797      | 2.807E-18 | 2.762255  | up        | PREDICTED: methionine adenosyltransferase 2 subunit beta [Sesamum indicum]                        |
| c37983.graph_c1 | 0.82821085    | 0.72955536    | 0.72371294    | 0.15260037     | 0.5496494      | 0.57028815     | 0.0002115 | -1.877336 | down      | PREDICTED: F-box/kelch-repeat protein At1g57790-like [Sesamum indicum]                            |
| c37985.graph_c0 | 4.30828312    | 3.27757388    | 4.5397778     | 2.14329857     | 1.85008995     | 2.401526       | 1.787E-05 | -1.941431 | down      | PREDICTED: uncharacterized protein LOC100267301 [Vitis vinifera]                                  |
| c37985.graph_c1 | 2.69168717    | 2.31716894    | 2.69796117    | 2.18218685     | 2.57446264     | 2.11821462     | 0.0053875 | -1.184588 | down      | hypothetical protein MIMGU_mgv1a007684mg [Erythranthe guttata]                                    |

| #ID             | 0 h-1<br>FPKM | 0 h-2<br>FPKM | 0 h-3<br>FPKM | 48 h-1<br>FPKM | 48 h-2<br>FPKM | 48 h-3<br>FPKM | FDR       | log2FC    | regulated | nr_annotation                                                                                     |
|-----------------|---------------|---------------|---------------|----------------|----------------|----------------|-----------|-----------|-----------|---------------------------------------------------------------------------------------------------|
| c37986.graph_c0 | 1.58161942    | 1.93861613    | 1.74209449    | 1.87340268     | 1.26009078     | 1.21713257     | 0.0015503 | -1.283691 | down      | PREDICTED: tonoplast dicarboxylate transporter [Sesamum indicum]                                  |
| c37987.graph_c0 | 5.0978445     | 5.50581363    | 4.82700253    | 0.3707737      | 0.65464963     | 0.76979515     | 5.272E-14 | -4.130836 | down      | -                                                                                                 |
| c37991.graph_c0 | 107.092761    | 106.998747    | 119.877889    | 65.7533112     | 56.6418157     | 46.4759044     | 1.049E-38 | -1.997931 | down      | hypothetical protein EUTSA_v10023737mg [Eutrema salsugineum]                                      |
| c37994.graph_c0 | 16.568386     | 17.2483758    | 17.768334     | 59.4181136     | 80.3219313     | 91.2196812     | 1.252E-06 | 1.138211  | up        | PREDICTED: polygalacturonase At1g48100 [Sesamum indicum]                                          |
| c37997.graph_c0 | 4.02702729    | 4.03105975    | 4.15268911    | 19.6490485     | 24.4549075     | 28.4872728     | 5.715E-12 | 1.548737  | up        | PREDICTED: mitochondrial inner membrane protease subunit 2-like isoform X1 [Sesamum indicum]      |
| c38000.graph_c0 | 0.06897801    | 0.20714124    | 0.17727894    | 1.17562023     | 1.64934938     | 1.92248831     | 2.476E-05 | 2.359446  | up        | hypothetical protein MIMGU_mgv1a004734mg [Erythranthe guttata]                                    |
| c38001.graph_c0 | 26.4993893    | 25.1191064    | 25.4266978    | 19.5235582     | 20.1775026     | 18.0692478     | 6.388E-24 | -1.432352 | down      | PREDICTED: KH domain-containing protein At4g18375 isoform X2 [Sesamum indicum]                    |
| c38004.graph_c0 | 0.07154288    | 0.07161452    | 0.09193543    | 2.47162367     | 2.33909111     | 2.75637563     | 1.753E-10 | 3.98792   | up        | PREDICTED: uncharacterized protein LOC105177313 isoform X1 [Sesamum indicum]                      |
| c38007.graph_c0 | 1.53917311    | 1.40064942    | 1.43847155    | 15.9845769     | 16.3874719     | 15.8288008     | 1.236E-07 | 2.443373  | up        | -                                                                                                 |
| c38008.graph_c0 | 1.04353948    | 0.81750086    | 1.04947008    | 6.35344558     | 6.55358138     | 6.99218713     | 8.417E-06 | 1.753883  | up        | PREDICTED: uncharacterized protein LOC105167885 [Sesamum indicum]                                 |
| c38010.graph_c0 | 17.3164442    | 19.0637367    | 14.7322648    | 9.26915636     | 10.6378428     | 10.5900814     | 7.417E-27 | -1.762938 | down      | PREDICTED: tyrosine-sulfated glycopeptide receptor 1 [Sesamum indicum]                            |
| c38012.graph_c0 | 0.07426168    | 0.07433604    | 0.06361946    | 2.71378314     | 3.67217205     | 3.18579112     | 1.02E-15  | 4.474752  | up        | PREDICTED: uncharacterized protein LOC105173003 [Sesamum indicum]                                 |
| c38014.graph_c0 | 0.12532598    | 0.06272574    | 0.08052442    | 4.38742168     | 6.54381205     | 7.19139737     | 1.372E-14 | 5.053883  | up        | acyl-CoA thioesterase, putative [Ricinus communis]                                                |
| c38015.graph_c0 | 13.0393057    | 9.841621      | 13.9782875    | 59.8063393     | 64.1742034     | 58.6454559     | 4.134E-14 | 1.288849  | up        | PREDICTED: protein yippee-like [Sesamum indicum]                                                  |
| c38018.graph_c0 | 5.59850988    | 6.80499792    | 6.42348825    | 1.1052241      | 3.31741093     | 3.60587978     | 5.834E-06 | -2.264678 | down      | -                                                                                                 |
| c38021.graph_c0 | 36.3865117    | 37.6805789    | 37.6610791    | 26.5991669     | 25.0188168     | 27.6685246     | 2.92E-26  | -1.512117 | down      | hypothetical protein MIMGU_mgv1a011020mg [Erythranthe guttata]                                    |
| c38028.graph_c0 | 0.23139901    | 0.32428301    | 0.05947138    | 3.49614976     | 4.47159668     | 4.81802848     | 1.279E-09 | 3.365922  | up        | hypothetical protein MIMGU_mgv1a013394mg [Erythranthe guttata]                                    |
| c38030.graph_c0 | 7.49861061    | 7.22017193    | 8.25943845    | 186.850611     | 264.438547     | 250.324492     | 9.406E-46 | 3.907716  | up        | PREDICTED: serine/threonine-protein kinase Nek6-like [Sesamum indicum]                            |
| c38031.graph_c0 | 20.1300671    | 17.3326082    | 18.304851     | 8.32959263     | 9.53179379     | 10.4182226     | 1.113E-28 | -1.999796 | down      | PREDICTED: uncharacterized protein LOC105175857 [Sesamum indicum]                                 |
| c38035.graph_c0 | 14.3065347    | 16.2534334    | 14.5040058    | 7.84421946     | 3.38197648     | 1.78551471     | 2.043E-37 | -2.786577 | down      | hypothetical protein MIMGU_mgv1a008930mg [Erythranthe guttata]                                    |
| c38036.graph_c0 | 7.77892878    | 6.96149534    | 6.68226342    | 1.34371061     | 1.09341186     | 1.43821632     | 2.745E-55 | -3.481237 | down      | PREDICTED: pentatricopeptide repeat-containing protein At1g74900, mitochondrial [Sesamum indicum] |

| #ID             | 0 h-1<br>FPKM | 0 h-2<br>FPKM | 0 h-3<br>FPKM | 48 h-1<br>FPKM | 48 h-2<br>FPKM | 48 h-3<br>FPKM | FDR       | log2FC    | regulated | nr_annotation                                                                        |
|-----------------|---------------|---------------|---------------|----------------|----------------|----------------|-----------|-----------|-----------|--------------------------------------------------------------------------------------|
| c38039.graph_c0 | 0.06696901    | 0.03351803    | 0             | 0.86374706     | 1.0457546      | 0.96069618     | 6.771E-08 | 3.833744  | up        | PREDICTED: DNA-directed primase/polymerase protein isoform X1 [Sesamum indicum]      |
| c38041.graph_c0 | 85.7662091    | 92.3659067    | 84.0673572    | 49.1985469     | 46.3617261     | 49.1464025     | 6.191E-40 | -1.873748 | down      | hypothetical protein MIMGU_mgv1a027042mg [Erythranthe guttata]                       |
| c38045.graph_c0 | 20.2820253    | 18.6030203    | 21.1835305    | 6.37928263     | 6.80167691     | 5.01707021     | 2.203E-48 | -2.740128 | down      | PREDICTED: cyclin-dependent kinase inhibitor 3 isoform X2 [Sesamum indicum]          |
| c38046.graph_c0 | 5.40152958    | 5.46137066    | 5.35728608    | 22.3930861     | 28.0568952     | 27.9933928     | 2.624E-16 | 1.25239   | up        | PREDICTED: alpha-L-fucosidase 2 isoform X1 [Sesamum indicum]                         |
| c38047.graph_c0 | 297.951936    | 281.049148    | 303.908687    | 31.1252784     | 32.4049504     | 32.6292675     | 6.43E-165 | -4.217452 | down      | PREDICTED: uncharacterized protein C6C3.02c-like [Malus domestica]                   |
| c38051.graph_c0 | 4.08551253    | 3.13167839    | 3.216244      | 19.0226539     | 23.6366211     | 24.5294753     | 5.633E-16 | 1.666947  | up        | PREDICTED: cysteine desulfurase 2, chloroplastic isoform X1 [Sesamum indicum]        |
| c38063.graph_c1 | 798.182712    | 762.336116    | 876.599721    | 20.5421399     | 20.4524507     | 17.6497933     | 6.81E-224 | -6.394478 | down      | PREDICTED: peroxygenase-like [Nicotiana glauca]                                      |
| c38065.graph_c1 | 0.45008328    | 0.09010679    | 0.23134994    | 3.81474391     | 2.89916379     | 3.76328578     | 5.159E-06 | 2.752986  | up        | PREDICTED: nudix hydrolase 16, mitochondrial-like [Sesamum indicum]                  |
| c38066.graph_c0 | 103.788976    | 96.7965648    | 98.691183     | 471.382928     | 473.943143     | 469.2886       | 8.94E-18  | 1.223701  | up        | KECHNAME: FWH=40S PROSOMAL PROTEIN 5 / [Avicennia marina]                            |
| c38067.graph_c0 | 0.56454144    | 0.79533542    | 0.69858929    | 5.50912689     | 4.122108       | 4.01071744     | 4.951E-07 | 1.716261  | up        | PREDICTED: LOW QUALITY PROTEIN: auxin response factor 19-like [Sesamum indicum]      |
| c38068.graph_c0 | 4.17200056    | 3.57420656    | 2.60814449    | 2.21608305     | 3.19136564     | 4.62154071     | 0.0015167 | -1.068196 | down      | hypothetical protein MIMGU_mgv1a007990mg [Erythranthe guttata]                       |
| c38070.graph_c0 | 27.6106125    | 30.4999876    | 29.4867104    | 124.341784     | 140.022105     | 139.19245      | 7.192E-16 | 1.183864  | up        | hypothetical protein MIMGU_mgv1a013689mg [Erythranthe guttata]                       |
| c38071.graph_c0 | 1.1213697     | 1.06013189    | 1.32092076    | 12.0525873     | 11.126622      | 11.0562629     | 2.732E-16 | 2.271204  | up        | PREDICTED: calcium-dependent protein kinase 26-like isoform X1 [Sesamum indicum]     |
| c38072.graph_c0 | 0.08360128    | 0.20084399    | 0.21486191    | 14.3255254     | 15.3067047     | 16.2007288     | 2.01E-99  | 5.495324  | up        | Lysosomal alpha-mannosidase [Glycine soja]                                           |
| c38073.graph_c1 | 5.58353899    | 4.12312873    | 6.35170012    | 33.9836046     | 27.7828017     | 37.516634      | 3.116E-10 | 1.609535  | up        | hypothetical protein MIMGU_mgv1a015825mg [Erythranthe guttata]                       |
| c38074.graph_c0 | 54.3237903    | 53.6378902    | 55.8984148    | 235.181945     | 235.760939     | 256.164514     | 2.955E-16 | 1.131226  | up        | PREDICTED: 60S ribosomal protein L13a-4-like [Sesamum indicum]                       |
| c38075.graph_c0 | 18.112022     | 18.0124302    | 16.9270294    | 5.11414331     | 6.3360884      | 5.68816746     | 4.245E-60 | -2.650137 | down      | PREDICTED: MAR-binding filament-like protein 1 [Sesamum indicum]                     |
| c38080.graph_c0 | 56.9674212    | 56.2433084    | 63.8935513    | 311.29796      | 334.460979     | 358.507391     | 2.474E-26 | 1.482826  | up        | --                                                                                   |
| c38081.graph_c0 | 0.17729124    | 0.22183597    | 0.39869597    | 19.1507073     | 23.4889206     | 29.9020716     | 2.787E-31 | 5.475207  | up        | hypothetical protein VITISV_034764 [Vitis vinifera]                                  |
| c38083.graph_c0 | 2.24485664    | 2.56065399    | 2.91827302    | 66.3478018     | 71.459333      | 83.8142525     | 1.591E-83 | 3.820207  | up        | PREDICTED: lysosomal beta glucosidase-like [Sesamum indicum]                         |
| c38086.graph_c0 | 0.32431482    | 0.23188541    | 0.31752944    | 11.5955084     | 12.9170774     | 13.2166731     | 3.382E-74 | 4.411736  | up        | PREDICTED: calcium-transporting ATPase, endoplasmic reticulum-type [Sesamum indicum] |

| #ID             | 0 h-1<br>FPKM | 0 h-2<br>FPKM | 0 h-3<br>FPKM | 48 h-1<br>FPKM | 48 h-2<br>FPKM | 48 h-3<br>FPKM | FDR       | log2FC    | regulated | nr_annotation                                                                                                          |
|-----------------|---------------|---------------|---------------|----------------|----------------|----------------|-----------|-----------|-----------|------------------------------------------------------------------------------------------------------------------------|
| c38087.graph_c0 | 0.34216005    | 0.30444682    | 0.26869896    | 2.27659003     | 3.72896914     | 3.75532896     | 2.557E-09 | 2.390676  | up        | hypothetical protein MIMGU_mgv1a023205mg<br>[Erythranthe guttata]                                                      |
| c38089.graph_c0 | 46.9909455    | 41.5770028    | 43.1828002    | 14.4866883     | 16.1075227     | 15.2953307     | 8.214E-61 | -2.540163 | down      | KINNO/CO-BOX superfamily protein isoform 1 [neobroma<br>coccifera]                                                     |
| c38090.graph_c0 | 0.14321456    | 0.19114396    | 0.10224243    | 4.09009645     | 3.86705143     | 3.99153774     | 2.929E-21 | 3.762186  | up        | PREDICTED: DNA (cytosine-5)-methyltransferase CMT2<br>[Sesamum indicum]                                                |
| c38091.graph_c0 | 2.70131736    | 1.73057428    | 2.29105784    | 14.1354169     | 18.19117       | 20.1950342     | 7.988E-12 | 1.943258  | up        | unnamed protein product [Coffea canephora]                                                                             |
| c38093.graph_c0 | 10.6724823    | 10.4568309    | 11.15761      | 6.16594766     | 5.47281867     | 4.22602865     | 1.145E-18 | -2.038739 | down      | PREDICTED: transcription intermediary factor 1-alpha<br>isoform X1 [Sesamum indicum]                                   |
| c38094.graph_c0 | 23.2188981    | 23.9118373    | 22.9594751    | 12.8707136     | 11.33046       | 10.0973655     | 2.121E-35 | -2.044796 | down      | PREDICTED: beta-D-glucosyl crocetin beta-1,6-<br>glucosyltransferase-like [Sesamum indicum]                            |
| c38097.graph_c0 | 0.99420141    | 0.89224554    | 0.68284885    | 17.1972473     | 17.9841856     | 18.8148648     | 6.61E-65  | 3.378311  | up        | PREDICTED: uncharacterized protein LOC105172430<br>[Sesamum indicum]                                                   |
| c38098.graph_c0 | 0.07345591    | 0.02450982    | 0.15732291    | 1.06020049     | 1.52940101     | 1.72614813     | 8.75E-08  | 3.041638  | up        | PREDICTED: pentatricopeptide repeat-containing protein<br>At2g37310 [Sesamum indicum]                                  |
| c38100.graph_c0 | 0.48094641    | 0.44439509    | 0.42787051    | 3.95362985     | 3.89953684     | 3.07817655     | 3.881E-08 | 1.999605  | up        | PREDICTED: DNA-binding protein SMUBP-2 [Sesamum<br>indicum]                                                            |
| c38102.graph_c0 | 0.38793186    | 0.20135127    | 0.24002227    | 6.72419148     | 7.86666173     | 7.04315117     | 7.175E-39 | 3.688883  | up        | PREDICTED: histidine kinase 1 [Sesamum indicum]                                                                        |
| c38104.graph_c0 | 2.40196804    | 1.72434849    | 2.21363946    | 24.2742899     | 28.3440636     | 25.4774117     | 2.132E-46 | 2.602835  | up        | PREDICTED: probable sulfate transporter 3.3 [Sesamum<br>indicum]                                                       |
| c38107.graph_c0 | 21.9477474    | 24.4785408    | 22.3944194    | 18.8170495     | 21.5574798     | 21.3899465     | 6.861E-16 | -1.175786 | down      | PREDICTED: uncharacterized aa1f domain-containing<br>protein kinase At1g79600, chloroplastic-like [Citrus<br>sinensis] |
| c38108.graph_c0 | 2.51842523    | 1.86736819    | 2.63696574    | 1.80455146     | 1.82066996     | 1.52921813     | 0.0032691 | -1.464135 | down      | PREDICTED: plasma membrane ATPase 4 isoform X1<br>[Eucalyptus grandis]                                                 |
| c38110.graph_c0 | 0.39804751    | 0.55782454    | 0.61380818    | 3.37370746     | 7.07037154     | 7.96157309     | 0.0001368 | 2.517998  | up        | PREDICTED: uncharacterized protein LOC105166696<br>[Sesamum indicum]                                                   |
| c38111.graph_c0 | 0             | 0             | 0             | 2.4579197      | 1.82270752     | 1.92459711     | 4.731E-12 | Inf       | up        | -                                                                                                                      |
| c38114.graph_c0 | 33.3256603    | 33.6683882    | 35.7424856    | 10.3446465     | 11.914032      | 12.2024341     | 2.683E-54 | -2.596903 | down      | PREDICTED: iron-sulfur assembly protein IscA-like 2,<br>mitochondrial isoform X1 [Sesamum indicum]                     |
| c38115.graph_c0 | 25.058219     | 22.2678373    | 22.3434147    | 10.8359411     | 8.98385136     | 9.6417552      | 7.328E-10 | -2.255159 | down      | PREDICTED: pyrophosphate--fructose 6-phosphate 1-<br>phosphotransferase subunit alpha 2 [Tarenaya hassleriana]         |
| c38123.graph_c0 | 1.30693137    | 1.04659205    | 1.59548563    | 3.85289736     | 7.525593       | 7.44580626     | 0.0045821 | 1.221156  | up        | -                                                                                                                      |
| c38124.graph_c1 | 0.3632881     | 0.18182594    | 0.32678771    | 2.34279285     | 1.73733346     | 1.39966201     | 0.0017496 | 1.641263  | up        | PREDICTED: LOW QUALITY PROTEIN: probable<br>WRKY transcription factor 70 [Sesamum indicum]                             |
| c38128.graph_c0 | 3.84966689    | 4.53355499    | 4.29222776    | 17.6806658     | 23.0678252     | 26.5451028     | 7.211E-09 | 1.384627  | up        | PREDICTED: protein cfxQ homolog [Sesamum indicum]                                                                      |
| c38130.graph_c0 | 41.029151     | 41.5377929    | 39.5430626    | 29.6227753     | 36.6333019     | 36.0223181     | 1.283E-19 | -1.276502 | down      | hypothetical protein MIMGU_mgv1a023381mg, partial<br>[Erythranthe guttata]                                             |
| c38136.graph_c0 | 0.02718134    | 0.08162568    | 0             | 4.43229689     | 3.52824287     | 3.56504508     | 7.92E-20  | 5.728085  | up        | PREDICTED: glutamate receptor 2.1-like [Sesamum<br>indicum]                                                            |

| #ID             | 0 h-1<br>FPKM | 0 h-2<br>FPKM | 0 h-3<br>FPKM | 48 h-1<br>FPKM | 48 h-2<br>FPKM | 48 h-3<br>FPKM | FDR       | log2FC    | regulated | nr_annotation                                                                     |
|-----------------|---------------|---------------|---------------|----------------|----------------|----------------|-----------|-----------|-----------|-----------------------------------------------------------------------------------|
| c38138.graph_c0 | 6.80330923    | 5.78860345    | 6.19261954    | 21.5189392     | 28.3852199     | 26.4438921     | 4.057E-06 | 1.001419  | up        | PREDICTED: xanthoxin dehydrogenase-like [Morus domestica]                         |
| c38141.graph_c0 | 17.6129728    | 17.878928     | 15.7112913    | 13.6143531     | 13.1430393     | 13.1452547     | 2.935E-21 | -1.375198 | down      | PREDICTED: RNA polymerase II-associated factor 1 homolog [Sesamum indicum]        |
| c38142.graph_c0 | 2.88268274    | 1.79546535    | 1.72870201    | 29.2718849     | 30.8849723     | 30.6144904     | 3.082E-26 | 2.810107  | up        | PREDICTED: uncharacterized protein LOC105179724 [Sesamum indicum]                 |
| c38144.graph_c0 | 0             | 0.06399927    | 0             | 2.35605278     | 2.68314865     | 3.43285761     | 2.521E-15 | 6.03848   | up        | PREDICTED: CYCUM-A2-1-like isoform A2 [Sesamum indicum]                           |
| c38146.graph_c1 | 22.8463035    | 20.7081652    | 19.1541275    | 125.956433     | 128.195615     | 120.246631     | 4.847E-28 | 1.562107  | up        | PREDICTED: uncharacterized protein LOC105174863 [Sesamum indicum]                 |
| c38148.graph_c0 | 11.0669437    | 7.9761784     | 10.4527737    | 55.6679234     | 61.5656528     | 70.8521247     | 1.01E-23  | 1.651875  | up        | PREDICTED: eukaryotic translation initiation factor 3 subunit K [Sesamum indicum] |
| c38149.graph_c0 | 43.1585196    | 42.2047732    | 39.7288489    | 17.5863499     | 12.3529013     | 11.5660819     | 4.69E-65  | -2.600465 | down      | PREDICTED: homeobox-leucine zipper protein HAT4-like [Sesamum indicum]            |
| c38151.graph_c0 | 0             | 0             | 0             | 2.90599499     | 5.64400709     | 3.55538819     | 1.906E-08 | Inf       | up        | --                                                                                |
| c38152.graph_c0 | 0.23631917    | 0.2183592     | 0.30367948    | 1.55748265     | 1.57899782     | 1.71367151     | 0.0002711 | 1.655575  | up        | PREDICTED: serine/threonine-protein kinase-like protein ACR4 [Sesamum indicum]    |
| c38155.graph_c0 | 1.89042535    | 2.28191328    | 2.2863731     | 14.3936724     | 19.6437826     | 22.2420382     | 2.337E-12 | 2.098053  | up        | PREDICTED: glucuronoxylan 4-O-methyltransferase 1-like [Sesamum indicum]          |
| c38157.graph_c0 | 0.42344085    | 0.15894932    | 0.40810369    | 2.73070932     | 2.09215436     | 2.863656       | 2.03E-05  | 1.938594  | up        | hypothetical protein MIMGU_mgv1a002532mg [Erythranthe guttata]                    |
| c38161.graph_c0 | 7.51549101    | 7.21734102    | 7.12882402    | 2.54756877     | 2.6988402      | 2.32243864     | 2.475E-42 | -2.547255 | down      | PREDICTED: uncharacterized protein LOC105168894 [Sesamum indicum]                 |
| c38166.graph_c0 | 21.7951588    | 22.3415785    | 20.6392949    | 6.60310586     | 7.95796883     | 7.88441296     | 4.665E-67 | -2.549206 | down      | hypothetical protein MIMGU_mgv1a001457mg [Erythranthe guttata]                    |
| c38167.graph_c0 | 3.88114464    | 3.30227637    | 4.05228243    | 0              | 0              | 0              | 1.775E-36 | -Inf      | down      | -                                                                                 |
| c38168.graph_c0 | 17.9023545    | 16.7508193    | 18.3688627    | 8.10395598     | 13.4478463     | 12.4781528     | 7.594E-23 | -1.666245 | down      | hypothetical protein MIMGU_mgv1a012288mg [Erythranthe guttata]                    |
| c38169.graph_c0 | 0.25023633    | 0.15655431    | 0.04019545    | 6.19560192     | 3.81598196     | 2.74358418     | 4.409E-05 | 3.843085  | up        | PREDICTED: nudix hydrolase 8-like isoform X3 [Sesamum indicum]                    |
| c38175.graph_c0 | 3.72770066    | 3.01951518    | 3.27753464    | 15.2053767     | 16.8263028     | 16.8668331     | 2.079E-11 | 1.26751   | up        | PREDICTED: protein CASP isoform A1 [Sesamum indicum]                              |
| c38176.graph_c0 | 44.8262197    | 46.266063     | 38.3824138    | 35.3911756     | 31.2816624     | 28.406503      | 1.065E-23 | -1.457901 | down      | PREDICTED: probable protein phosphatase 2C 9 [Sesamum indicum]                    |
| c38178.graph_c0 | 133.34149     | 131.759037    | 145.747944    | 125.318516     | 120.324848     | 114.280162     | 4.478E-17 | -1.208166 | down      | PREDICTED: zinc finger CCCH domain-containing protein 14-like [Sesamum indicum]   |
| c38182.graph_c0 | 4.25202691    | 4.93729022    | 3.9340965     | 30.8678869     | 58.2223336     | 66.0858503     | 4.705E-06 | 2.536194  | up        | PREDICTED: homeobox-leucine zipper protein ATHB-6 [Sesamum indicum]               |
| c38184.graph_c0 | 1.26098834    | 1.61287632    | 1.44037329    | 15.7475528     | 12.7170812     | 13.1793928     | 4.872E-17 | 2.257077  | up        | hypothetical protein CICLE_V100081 / 5mg [Citrus clamentina]                      |
| c38185.graph_c0 | 3.73059573    | 4.04552563    | 4.26130063    | 1.1456227      | 1.41592306     | 1.35915759     | 6.814E-08 | -2.640577 | down      | -                                                                                 |

| #ID             | 0 h-1<br>FPKM | 0 h-2<br>FPKM | 0 h-3<br>FPKM | 48 h-1<br>FPKM | 48 h-2<br>FPKM | 48 h-3<br>FPKM | FDR       | log2FC    | regulated | nr_annotation                                                                                          |
|-----------------|---------------|---------------|---------------|----------------|----------------|----------------|-----------|-----------|-----------|--------------------------------------------------------------------------------------------------------|
| c38190.graph_c0 | 311.498325    | 330.084368    | 288.486018    | 55.5715333     | 47.7823153     | 46.1507351     | 1.01E-126 | -3.650234 | down      | PREDICTED: early nodum-like protein 2 [Sesamum indicum]                                                |
| c38193.graph_c0 | 7.60540689    | 7.02989742    | 7.07000989    | 29.4277069     | 36.0708709     | 36.9555655     | 9.586E-14 | 1.217964  | up        | PREDICTED: dolichyl-diphosphooligosaccharide--protein glycosyltransferase subunit 1B [Sesamum indicum] |
| c38200.graph_c0 | 6.98927563    | 6.19585312    | 6.85029349    | 2.04628493     | 1.76313649     | 1.69938723     | 3.955E-29 | -2.87713  | down      | hypothetical protein MIMGU_mgv1a005237mg [Erythranthe guttata]                                         |
| c38202.graph_c0 | 0             | 0             | 0             | 4.28978702     | 3.8575485      | 2.75180994     | 4.051E-15 | Inf       | up        | --                                                                                                     |
| c38203.graph_c0 | 0             | 0.05191232    | 0.13328531    | 3.34440219     | 4.80834166     | 3.95360133     | 3.15E-13  | 4.987537  | up        | PREDICTED: psbP domain-containing protein 3, chloroplastic [Sesamum indicum]                           |
| c38204.graph_c0 | 0             | 0.15686325    | 0.30206075    | 11.4772632     | 10.6293638     | 10.0839419     | 1.383E-18 | 5.099252  | up        | PREDICTED: uncharacterized protein LOC105164617 isoform X2 [Sesamum indicum]                           |
| c38206.graph_c0 | 0.21455029    | 0             | 0.0689264     | 1.53184732     | 1.77985228     | 3.25368102     | 0.000119  | 3.516774  | up        | PREDICTED: putative UDP-glucuronate:xylan alpha-glucuronosyltransferase 4 [Sesamum indicum]            |
| c38209.graph_c0 | 0.14603641    | 0.19491019    | 0.18766257    | 3.72222535     | 4.79840829     | 5.18749139     | 5.193E-11 | 3.672527  | up        | PREDICTED: T-complex protein 1 subunit epsilon [Sesamum indicum]                                       |
| c38212.graph_c0 | 39.3199978    | 41.4080447    | 39.609296     | 13.2555237     | 13.9820915     | 11.9980419     | 9.548E-56 | -2.634038 | down      | hypothetical protein MIMGU_mgv1a000768mg [Erythranthe guttata]                                         |
| c38212.graph_c1 | 17.5635205    | 20.3617931    | 19.6910158    | 3.21962126     | 1.92404008     | 2.93825604     | 3.308E-41 | -3.845372 | down      | PREDICTED: uncharacterized protein At4g14450, chloroplastic-like [Sesamum indicum]                     |
| c38217.graph_c0 | 112.276987    | 111.548597    | 112.617847    | 28.728885      | 16.4641517     | 13.7711995     | 1.08E-123 | -3.516812 | down      | PREDICTED: dnaJ protein homolog [Sesamum indicum]                                                      |
| c38218.graph_c0 | 3.28902837    | 2.64198666    | 2.33068002    | 9.40193773     | 13.6193363     | 15.1560556     | 4.492E-05 | 1.186301  | up        | PREDICTED: histidine kinase 4 [Sesamum indicum]                                                        |
| c38219.graph_c0 | 62.5610414    | 67.4230299    | 65.1892216    | 322.871735     | 316.156227     | 336.861317     | 6.165E-21 | 1.304303  | up        | PREDICTED: 40S ribosomal protein S10 [Solanum lycopersicum]                                            |
| c38224.graph_c0 | 3.86148587    | 2.64132425    | 2.81189193    | 16.5421548     | 15.8913083     | 12.6615999     | 5.407E-05 | 1.262651  | up        | PREDICTED: transcription factor MYB1R1-like [Sesamum indicum]                                          |
| c38225.graph_c0 | 10.3170679    | 11.0158921    | 8.41767662    | 123.742869     | 93.94664       | 73.3232283     | 1.58E-06  | 2.282636  | up        | PREDICTED: LOW QUALITY PROTEIN: transcription factor BIM2 [Sesamum indicum]                            |
| c38238.graph_c0 | 3.18338658    | 2.37298084    | 3.04632389    | 12.9165505     | 13.1546874     | 14.1858895     | 2.883E-07 | 1.207455  | up        | PREDICTED: probable glucuronosyltransferase Os03g0107900 [Sesamum indicum]                             |
| c38241.graph_c0 | 0             | 0             | 0             | 3.69682868     | 5.24098672     | 6.38533681     | 1.941E-17 | Inf       | up        | PREDICTED: lipid phosphate phosphatase epsilon 2, chloroplastic isoform X1 [Sesamum indicum]           |
| c38242.graph_c0 | 1.86858413    | 1.83848164    | 1.76498799    | 12.6240516     | 10.6770997     | 10.905509      | 1.595E-17 | 1.63042   | up        | PREDICTED: filament-like plant protein 4 [Sesamum indicum]                                             |
| c38243.graph_c0 | 5.53297976    | 6.31585637    | 4.98954249    | 0.62598935     | 0.47368558     | 0.39785826     | 8.709E-19 | -4.499824 | down      | -                                                                                                      |
| c38245.graph_c0 | 55.8168583    | 70.1049219    | 50.509392     | 1403.43966     | 1078.58828     | 917.884202     | 5.258E-13 | 3.259485  | up        | PREDICTED: acyl-[acyl-carrier-protein] desaturase, chloroplastic [Sesamum indicum]                     |
| c38246.graph_c0 | 1.68565245    | 1.30854968    | 1.19358191    | 31.6925099     | 34.6487512     | 37.0263436     | 1.085E-68 | 3.608645  | up        | PREDICTED: uncharacterized GPI-anchored protein At4g28100 [Nicotiana glauca]                           |
| c38248.graph_c0 | 8.74166794    | 8.40860806    | 9.30265059    | 4.02669734     | 5.53220622     | 6.49406258     | 1.087E-08 | -1.745714 | down      | hypothetical protein MIMGU_mgv1a027006mg [Erythranthe guttata]                                         |



| #ID             | 0 h-1<br>FPKM | 0 h-2<br>FPKM | 0 h-3<br>FPKM | 48 h-1<br>FPKM | 48 h-2<br>FPKM | 48 h-3<br>FPKM | FDR       | log2FC    | regulated | nr_annotation                                                                                                                     |
|-----------------|---------------|---------------|---------------|----------------|----------------|----------------|-----------|-----------|-----------|-----------------------------------------------------------------------------------------------------------------------------------|
| c38249.graph_c0 | 0.07390123    | 0             | 0.094966      | 2.00843765     | 1.87525763     | 2.1808626      | 5.945E-10 | 4.139973  | up        | PREDICTED: uncharacterized protein LOC105164781 [Sesamum indicum]                                                                 |
| c38255.graph_c0 | 0.5989865     | 0.666207      | 0.14254099    | 18.7825027     | 21.7598184     | 23.7685672     | 1.21E-84  | 4.50401   | up        | PREDICTED: probable protein S-acyltransferase 22 isoform X1 [Sesamum indicum]                                                     |
| c38256.graph_c0 | 4.09997867    | 4.97050195    | 5.09301375    | 30.595059      | 26.9875657     | 26.3644025     | 8.547E-15 | 1.550977  | up        | PREDICTED: cyclin-dependent kinase inhibitor 4-like [Musa acuminata subsp. malaccensis]                                           |
| c38257.graph_c2 | 31.1715947    | 31.2581652    | 32.2396298    | 157.410237     | 145.581845     | 152.030494     | 2.165E-18 | 1.248378  | up        | PREDICTED: chaperonin CPN60-2, mitochondrial [Sesamum indicum]                                                                    |
| c38258.graph_c0 | 2.7594256     | 2.89372154    | 2.47655127    | 2.3000521      | 2.50074805     | 3.4289066      | 0.0004436 | -1.002491 | down      | PREDICTED: probable rhamnogalacturonate lyase B [Sesamum indicum]                                                                 |
| c38259.graph_c0 | 6.63049026    | 6.39016673    | 7.68821323    | 61.3685145     | 49.8128181     | 35.2153851     | 4.213E-05 | 1.809239  | up        | PREDICTED: lysine histidine transporter 1-like [Sesamum indicum]                                                                  |
| c38268.graph_c0 | 0             | 0             | 0.10204909    | 5.70652745     | 6.74291702     | 5.85880824     | 5.503E-15 | 6.43507   | up        | hypothetical protein MIMGU_mgv1a003097mg [Erythranthe guttata]                                                                    |
| c38269.graph_c0 | 0.23295128    | 0.26233261    | 0.22451371    | 13.3862931     | 12.4475864     | 12.5077887     | 2.069E-44 | 4.720012  | up        | PREDICTED: uncharacterized protein LOC105168472 [Sesamum indicum]                                                                 |
| c38271.graph_c0 | 0.05417448    | 0.05422872    | 0             | 2.5453621      | 2.64362991     | 2.7533445      | 7.898E-11 | 5.193119  | up        | PREDICTED: agamous-like MADS-box protein AGL12 [Sesamum indicum]                                                                  |
| c38277.graph_c0 | 1.21892652    | 1.27824933    | 1.71554682    | 27.2717549     | 28.6078712     | 29.7380435     | 1.684E-34 | 3.322756  | up        | PREDICTED: threonine dehydratase biosynthetic, chloroplastic [Phoenix dactylifera]                                                |
| c38278.graph_c0 | 44.7620074    | 45.1987262    | 44.0490864    | 26.089145      | 25.7702602     | 27.6713308     | 5.78E-33  | -1.770279 | down      | PREDICTED: probable BOI-related E3 ubiquitin-protein ligase 2 [Sesamum indicum]                                                   |
| c38278.graph_c1 | 3.11786497    | 3.64115155    | 3.56140438    | 0.1595767      | 0.50715649     | 0.56796155     | 9.607E-12 | -4.099149 | down      | zinc ion binding protein, partial [Genlisea aurea]                                                                                |
| c38281.graph_c0 | 0.32313676    | 0.10782011    | 0.55365804    | 2.9967929      | 5.23516514     | 5.93346695     | 2.302E-07 | 2.808684  | up        | hypomeucal protein CICLE_v1002/1950mg [Citrus clamentina]                                                                         |
| c38284.graph_c0 | 3.53468035    | 2.68046955    | 2.89049358    | 33.2545278     | 38.9402214     | 38.809015      | 1.565E-33 | 2.588561  | up        | PREDICTED: E3 ubiquitin ligase BIG BROTHER-like [Sesamum indicum]                                                                 |
| c38288.graph_c0 | 4.53247844    | 4.92357902    | 4.20507037    | 2.73381056     | 1.76545569     | 1.69943751     | 2.186E-19 | -2.14702  | down      | PREDICTED: G-type lectin 5-receptor-like serine/threonine-protein kinase At4g27290 [Sesamum indicum]                              |
| c38291.graph_c0 | 0.26880006    | 0.18834845    | 0.06908374    | 1.85727108     | 2.7545749      | 3.30517728     | 2.246E-08 | 2.896239  | up        | PREDICTED: two-component response regulator ARR9 [Sesamum indicum]                                                                |
| c38292.graph_c0 | 21.6333976    | 19.7340468    | 17.8232412    | 148.270277     | 146.730458     | 149.878202     | 4.36E-40  | 1.894332  | up        | PREDICTED: UDP-glucose 4-epimerase GEPI48 [Sesamum indicum]                                                                       |
| c38294.graph_c0 | 0.07325987    | 0.14666646    | 0             | 8.2339964      | 9.65241232     | 12.0708087     | 4.768E-20 | 6.082572  | up        | PREDICTED: uncharacterized protein LOC105163186 [Sesamum indicum]                                                                 |
| c38296.graph_c2 | 5.19854445    | 6.95127799    | 6.68033544    | 41.6735207     | 48.9187566     | 47.7344365     | 3.556E-29 | 1.855201  | up        | PREDICTED: LOW QUALITY PROTEIN: succinate dehydrogenase [ubiquinone] flavoprotein subunit 1, mitochondrial-like [Sesamum indicum] |

| #ID             | 0 h-1<br>FPKM | 0 h-2<br>FPKM | 0 h-3<br>FPKM | 48 h-1<br>FPKM | 48 h-2<br>FPKM | 48 h-3<br>FPKM | FDR       | log2FC    | regulated | nr_annotation                                                                            |
|-----------------|---------------|---------------|---------------|----------------|----------------|----------------|-----------|-----------|-----------|------------------------------------------------------------------------------------------|
| c38298.graph_c0 | 1309.473      | 1284.57546    | 1277.70993    | 184.065184     | 189.123727     | 192.558827     | 2.187E-92 | -3.79264  | down      | hypothetical protein ZEAMIMB73_435257, partial [Zea mays]                                |
| c38300.graph_c0 | 31.2218391    | 32.5363431    | 29.4931406    | 25.4491142     | 32.4491639     | 25.2207856     | 2.091E-15 | -1.185467 | down      | PREDICTED: pollen-specific leucine-rich repeat extensin-like protein 1 [Sesamum indicum] |
| c38303.graph_c0 | 2.5330782     | 2.06387242    | 2.34670416    | 0.434165       | 0.22997258     | 0.62776578     | 3.201E-11 | -3.441487 | down      | PREDICTED: uncharacterized protein LOC104427989 [Eucalyptus grandis]                     |
| c38304.graph_c1 | 4.56562355    | 4.32783648    | 4.26691419    | 36.8356791     | 39.1579629     | 51.5459077     | 4.715E-17 | 2.256467  | up        | PREDICTED: delta(8)-fatty-acid desaturase [Sesamum indicum]                              |
| c38304.graph_c2 | 0.7076121     | 0.81456877    | 1.18210244    | 12.809804      | 19.4751268     | 19.8958967     | 2.218E-18 | 3.23986   | up        | PREDICTED: peroxidase 31 [Sesamum indicum]                                               |
| c38306.graph_c0 | 1.51652664    | 1.20396689    | 2.15039644    | 8.96085949     | 9.03360806     | 6.30149396     | 0.0003159 | 1.29848   | up        | PREDICTED: PGR5-like protein 1B, chloroplastic isoform X1 [Sesamum indicum]              |
| c38308.graph_c0 | 55.8993162    | 52.9116976    | 55.2271269    | 299.022941     | 306.392366     | 302.592763     | 2.475E-25 | 1.450807  | up        | PREDICTED: 60S ribosomal protein L7a [Sesamum indicum]                                   |
| c38310.graph_c0 | 31.655055     | 33.9297018    | 29.7362978    | 23.4577714     | 23.2204608     | 21.8076757     | 4.139E-23 | -1.492781 | down      | PREDICTED: histone acetyltransferase HAC1-like isoform X1 [Sesamum indicum]              |
| c38315.graph_c0 | 10.4488424    | 10.2221926    | 8.99654625    | 93.0851627     | 80.2976025     | 74.649674      | 3.683E-19 | 2.0512    | up        | PREDICTED: transcription factor PIF3 isoform X2 [Sesamum indicum]                        |
| c38316.graph_c1 | 13.0848142    | 12.2247222    | 17.3749878    | 11.6527648     | 11.4933333     | 10.0110235     | 0.0042271 | -1.384015 | down      | -                                                                                        |
| c38316.graph_c2 | 64.2956726    | 51.4410659    | 51.2621257    | 57.9362863     | 48.0935027     | 44.8189055     | 2.482E-08 | -1.158188 | down      | PREDICTED: uncharacterized protein LOC105160920 [Sesamum indicum]                        |
| c38321.graph_c0 | 2.12384068    | 2.25481389    | 1.53001691    | 33.1736123     | 31.7201554     | 32.0500287     | 3.572E-54 | 3.023181  | up        | hypothetical protein MIMGU_mgv1a017270mg [Erythranthe guttata]                           |
| c38322.graph_c0 | 107.160284    | 109.211482    | 110.300283    | 11.5149776     | 12.5777789     | 12.0404477     | 7.05E-164 | -4.195468 | down      | PREDICTED: protein phosphatase 2C 37-like [Sesamum indicum]                              |
| c38324.graph_c0 | 37.469595     | 33.3396579    | 38.4989501    | 11.0552439     | 11.5523476     | 12.3128413     | 9.606E-46 | -2.665757 | down      | Mitogen-activated protein kinase 10 [Morus notabilis]                                    |
| c38330.graph_c0 | 25.0624638    | 21.9308472    | 21.9685073    | 11.9268593     | 11.7441274     | 12.8573885     | 7.497E-20 | -1.93367  | down      | PREDICTED: U-box domain-containing protein 4 [Sesamum indicum]                           |
| c38331.graph_c0 | 0.09796823    | 0.09806633    | 0.04196435    | 345.525174     | 391.284105     | 449.216809     | 3.56E-230 | 11.26984  | up        | PREDICTED: raucaffricine-O-beta-D-glucosidase-like [Sesamum indicum]                     |
| c38333.graph_c0 | 5.46421833    | 5.69895836    | 4.87737413    | 22.6680463     | 27.558673      | 28.9673971     | 6.347E-13 | 1.283612  | up        | PREDICTED: uncharacterized protein At2g39795, mitochondrial-like [Sesamum indicum]       |
| c38336.graph_c0 | 11.7291383    | 14.8197861    | 10.3820426    | 78.9265629     | 59.397738      | 51.6375267     | 0.0002563 | 1.354484  | up        | PREDICTED: ankyrin repeat-containing protein At5g02620 [Sesamum indicum]                 |
| c38337.graph_c0 | 0.47332445    | 0.09475968    | 0.1824722     | 2.39831544     | 1.43204466     | 3.10400969     | 0.0016906 | 2.199666  | up        | PREDICTED: nicotianamine aminotransferase A-like [Sesamum indicum]                       |
| c38338.graph_c0 | 0.17699739    | 0.35434925    | 0.34117298    | 2.28286157     | 2.01534585     | 1.3783662      | 0.0007531 | 1.685894  | up        | PREDICTED: uncharacterized protein LOC105156552 [Sesamum indicum]                        |
| c38340.graph_c0 | 0.04254789    | 0.0425905     | 0             | 9.83867139     | 11.0042352     | 13.183903      | 2.302E-37 | 7.638233  | up        | PREDICTED: protein NRT1/ PTR FAMILY 4.5-like, partial [Sesamum indicum]                  |

| #ID             | 0 h-1<br>FPKM | 0 h-2<br>FPKM | 0 h-3<br>FPKM | 48 h-1<br>FPKM | 48 h-2<br>FPKM | 48 h-3<br>FPKM | FDR       | log2FC    | regulated | nr_annotation                                                                   |
|-----------------|---------------|---------------|---------------|----------------|----------------|----------------|-----------|-----------|-----------|---------------------------------------------------------------------------------|
| c38344.graph_c0 | 0.14401642    | 0.64872284    | 0.462667      | 21.8917577     | 10.5416649     | 8.85416108     | 0.0003355 | 4.035286  | up        | PREDICTED: uncharacterized protein LOC105173288 [Sesamum indicum]               |
| c38347.graph_c0 | 1.40535855    | 1.44814126    | 1.75282545    | 38.0034865     | 40.4214488     | 39.0671449     | 4.978E-68 | 3.652096  | up        | cyclin dependent kinase A [Camellia sinensis]                                   |
| c38350.graph_c0 | 0             | 0             | 0             | 1.82542809     | 2.43433776     | 2.90455        | 2.479E-19 | Inf       | up        | PREDICTED: uncharacterized protein LOC105176095 isoform X2 [Sesamum indicum]    |
| c38351.graph_c0 | 2.71687605    | 2.126864      | 2.95417124    | 23.4572598     | 27.3657299     | 26.2686161     | 3.216E-30 | 2.2835    | up        | PREDICTED: uncharacterized protein LOC105170284 [Sesamum indicum]               |
| c38352.graph_c0 | 12.5143996    | 13.8736829    | 13.4469872    | 7.02368939     | 7.89928069     | 6.79232211     | 1.884E-31 | -1.894273 | down      | PREDICTED: U-box domain-containing protein 33-like [Sesamum indicum]            |
| c38354.graph_c0 | 1.36312996    | 1.15457263    | 1.61693166    | 30.9121041     | 29.0635181     | 30.9435799     | 2.651E-22 | 3.439443  | up        | PREDICTED: auxin-responsive protein IAA26 [Sesamum indicum]                     |
| c38355.graph_c0 | 110.727094    | 100.198137    | 112.907262    | 6.83347724     | 8.58260475     | 4.57596132     | 7.74E-196 | -5.03619  | down      | hypothetical protein MIMGU_mgv1a006265mg [Erythranthe guttata]                  |
| c38360.graph_c0 | 1.47596559    | 1.21671821    | 2.67765772    | 14.6373709     | 14.4896987     | 15.3017082     | 5.621E-08 | 2.022883  | up        | unnamed protein product [Coffea canephora]                                      |
| c38360.graph_c1 | 0.58020349    | 0.7467229     | 0.53256032    | 7.06331714     | 6.2288655      | 8.93474563     | 1.612E-10 | 2.563154  | up        | PREDICTED: auxin transporter-like protein 3 [Sesamum indicum]                   |
| c38361.graph_c0 | 1.40040248    | 1.15259504    | 1.95953464    | 17.3165741     | 16.3402451     | 16.8112465     | 3.526E-26 | 2.462161  | up        | PREDICTED: uncharacterized protein LOC105173063 [Sesamum indicum]               |
| c38362.graph_c0 | 1.17260636    | 1.45833341    | 0.95890175    | 11.7521529     | 12.9701752     | 15.6709284     | 2.711E-18 | 2.474275  | up        | PREDICTED: phospholipase D delta [Sesamum indicum]                              |
| c38362.graph_c1 | 0.74452019    | 0             | 0             | 12.6891604     | 9.08285593     | 12.2062039     | 5.452E-09 | 4.520081  | up        | -                                                                               |
| c38369.graph_c0 | 5.18625011    | 3.20323101    | 4.46665759    | 0.8132616      | 1.40002208     | 1.26636174     | 2.639E-12 | -2.911769 | down      | -                                                                               |
| c38371.graph_c0 | 7.67124357    | 3.02830852    | 2.77685964    | 0              | 0              | 0              | 3.687E-07 | -Inf      | down      | PREDICTED: plastocyanin, chloroplastic-like [Solanum tuberosum]                 |
| c38372.graph_c0 | 45.264079     | 48.5567486    | 50.3537522    | 13.6490568     | 15.1077061     | 16.24897       | 9.65E-76  | -2.700421 | down      | PREDICTED: myosin-14 [Sesamum indicum]                                          |
| c38374.graph_c0 | 0             | 0             | 0             | 1.50010609     | 2.11890734     | 1.4619078      | 1.692E-12 | Inf       | up        | FRUCTOSE-BISPHOSPHATE AMYLASE A [KOZEZIA ANOMYCIS]                              |
| c38375.graph_c0 | 22.603314     | 26.5740998    | 21.2485283    | 28.4403504     | 14.5093467     | 9.32655506     | 2.058E-05 | -1.428365 | down      | PREDICTED: WRKY transcription factor 22 [Sesamum indicum]                       |
| c38376.graph_c0 | 0.13795438    | 0.36824673    | 0.05909228    | 3.092586       | 4.2635738      | 4.29727595     | 3.314E-09 | 3.35162   | up        | -                                                                               |
| c38376.graph_c1 | 0.247906      | 0.16543616    | 0.26547419    | 4.60580812     | 6.2906616      | 6.02878698     | 2.04E-13  | 3.614892  | up        | PREDICTED: receptor-like serine/threonine-protein kinase ALE2 [Sesamum indicum] |
| c38378.graph_c0 | 27.9984278    | 26.1916121    | 26.4647209    | 113.937199     | 122.842392     | 127.720154     | 1.035E-16 | 1.1573    | up        | PREDICTED: acyl-coenzyme A oxidase 4, peroxisomal [Sesamum indicum]             |
| c38383.graph_c0 | 0.02887026    | 0.08669752    | 0.1112983     | 4.28214442     | 4.8745305      | 5.58517652     | 4.687E-21 | 4.992134  | up        | PREDICTED: transcription factor LHW-like [Sesamum indicum]                      |
| c38383.graph_c1 | 0.21250368    | 0.04254329    | 0.05461513    | 5.87316765     | 4.60421263     | 5.12139107     | 1.292E-15 | 4.651505  | up        | PREDICTED: transcription factor LHW-like [Sesamum indicum]                      |
| c38384.graph_c0 | 0.10878371    | 0.21778527    | 0.06989568    | 2.4052475      | 4.03444112     | 2.45228358     | 1.091E-07 | 3.469721  | up        | -                                                                               |
| c38388.graph_c0 | 10.8320539    | 14.4572008    | 10.0530575    | 4.6199975      | 6.46051183     | 7.39952278     | 2.304E-06 | -1.957922 | down      | -                                                                               |
| c38389.graph_c0 | 10.4665468    | 9.61721066    | 9.5253283     | 6.50646617     | 6.70651974     | 8.05823907     | 1.95E-14  | -1.49587  | down      | PREDICTED: glucan endo-1,3-beta-glucosidase 4-like [Sesamum indicum]            |

| #ID             | 0 h-1<br>FPKM | 0 h-2<br>FPKM | 0 h-3<br>FPKM | 48 h-1<br>FPKM | 48 h-2<br>FPKM | 48 h-3<br>FPKM | FDR       | log2FC    | regulated | nr_annotation                                                                                             |
|-----------------|---------------|---------------|---------------|----------------|----------------|----------------|-----------|-----------|-----------|-----------------------------------------------------------------------------------------------------------|
| c38390.graph_c0 | 23.5147851    | 21.6576917    | 21.5338128    | 12.7858454     | 10.5580434     | 10.0602428     | 1.311E-37 | -2.010337 | down      | PREDICTED: F-box protein At3g07870-like [Sesamum indicum]                                                 |
| c38392.graph_c0 | 19.2928959    | 16.704361     | 23.2539369    | 15.3737524     | 18.4169447     | 15.8728056     | 8.373E-07 | -1.277147 | down      | PREDICTED: lactoylglutathione lyase [Nicotiana sylvestris]                                                |
| c38393.graph_c1 | 46.040942     | 48.2769969    | 46.2825319    | 22.7722344     | 17.4001769     | 19.1116175     | 2.122E-54 | -2.258576 | down      | PREDICTED: ngn1-inducible protein CRK2 [Sesamum indicum]                                                  |
| c38399.graph_c0 | 0.86999904    | 0.54429388    | 0.65215687    | 3.873916       | 3.92705011     | 4.1007261      | 0.0004568 | 1.50955   | up        | PREDICTED: probable flavin-containing monooxygenase 1 [Sesamum indicum]                                   |
| c38402.graph_c0 | 0.22160395    | 0.35492136    | 0.39867778    | 1.22493605     | 2.20604106     | 2.54319504     | 0.0022265 | 1.582279  | up        | hypothetical protein MIMGU_mgv1a004574mg [Erythranthe guttata]                                            |
| c38403.graph_c0 | 0.19994678    | 0             | 0.25693953    | 4.97350845     | 7.41538914     | 9.34250669     | 3.004E-09 | 4.536598  | up        | PREDICTED: 2-hydroxyisoflavanone dehydratase [Sesamum indicum]                                            |
| c38404.graph_c0 | 0.02964148    | 0.02967116    | 0             | 4.36922616     | 6.21976902     | 6.80349454     | 3.703E-28 | 7.187994  | up        | PREDICTED: phosphoinositide phospholipase C 2-like [Sesamum indicum]                                      |
| c38405.graph_c0 | 1.13613035    | 1.63766593    | 1.10957908    | 0.08373419     | 0.04435311     | 0.26077163     | 2.092E-13 | -4.342757 | down      | PREDICTED: BEACH domain-containing protein lvsA-like [Sesamum indicum]                                    |
| c38406.graph_c0 | 0             | 0             | 0             | 1.88264503     | 1.47089517     | 2.5546285      | 8.79E-15  | Inf       | up        | PREDICTED: potassium channel SKOR-like [Sesamum indicum]                                                  |
| c38416.graph_c0 | 3.67987069    | 2.9835133     | 3.14538729    | 24.4979576     | 26.0501207     | 29.2916709     | 3.279E-37 | 2.006431  | up        | PREDICTED: probable sucrose-phosphate synthase 2 [Sesamum indicum]                                        |
| c38416.graph_c1 | 0.86826032    | 0.65184731    | 0.83681166    | 5.59928625     | 6.14361358     | 9.25267801     | 0.0001639 | 2.1321    | up        | -                                                                                                         |
| c38419.graph_c0 | 2.61087281    | 1.65220455    | 2.19815254    | 1.54824315     | 1.64017589     | 2.70603427     | 0.0022566 | -1.154625 | down      | hypothetical protein MIMGU_mgv1a007101mg [Erythranthe guttata]                                            |
| c38423.graph_c0 | 15.3066269    | 14.6835394    | 15.0254054    | 6.56109741     | 7.62500753     | 7.79855582     | 6.499E-22 | -2.054301 | down      | PREDICTED: coiled-coil domain-containing protein 97 [Sesamum indicum]                                     |
| c38428.graph_c0 | 1.66741002    | 1.65238888    | 1.60701592    | 9.57007037     | 8.7876368      | 8.41971252     | 1.178E-11 | 1.427262  | up        | PREDICTED: structural maintenance of chromosomes protein 5 [Sesamum indicum]                              |
| c38429.graph_c0 | 0.17102676    | 0.28533003    | 0.1831468     | 7.16902586     | 7.01050487     | 9.79041247     | 5.256E-25 | 4.20986   | up        | PREDICTED: kinesin-like protein KIN12A isoform X2 [Sesamum indicum]                                       |
| c38433.graph_c0 | 7.73187122    | 8.5326067     | 8.10334576    | 38.3888601     | 34.1119252     | 30.2877827     | 4.468E-08 | 1.062384  | up        | PREDICTED: uncharacterized protein LOC105163069 [Sesamum indicum]                                         |
| c38435.graph_c0 | 0.09024382    | 0.31616966    | 0.23193377    | 2.16160091     | 2.5982171      | 2.10831983     | 1.711E-05 | 2.404896  | up        | PREDICTED: BEL1-like homeodomain protein 4 [Sesamum indicum]                                              |
| c38436.graph_c0 | 3.04965361    | 2.93252205    | 2.25261079    | 13.0964376     | 13.3116246     | 12.7948233     | 3.66E-09  | 1.236742  | up        | PREDICTED: putative tRNA pseudouridine synthase Pus10 [Sesamum indicum]                                   |
| c38437.graph_c0 | 1.39223764    | 1.27066425    | 1.15764032    | 0.67903418     | 0.83924678     | 1.07413428     | 0.000927  | -1.580968 | down      | PREDICTED: probably inactive leucine-rich repeat receptor-like protein kinase At2g25790 [Sesamum indicum] |
| c38439.graph_c0 | 2.77462121    | 2.01992696    | 2.64711223    | 0.6971351      | 0.94367736     | 1.44738211     | 1.258E-07 | -2.295363 | down      | PREDICTED: telomere repeat-binding protein 5-like isoform X2 [Nicotiana sylvestris]                       |
| c38441.graph_c0 | 56.0023774    | 55.3104843    | 52.6599815    | 22.6444184     | 24.3728397     | 22.7279223     | 5.405E-54 | -2.250979 | down      | PREDICTED: UBA and UBX domain-containing protein At4g15410-like [Sesamum indicum]                         |

| #ID             | 0 h-1<br>FPKM | 0 h-2<br>FPKM | 0 h-3<br>FPKM | 48 h-1<br>FPKM | 48 h-2<br>FPKM | 48 h-3<br>FPKM | FDR       | log2FC    | regulated | nr_annotation                                                                                             |
|-----------------|---------------|---------------|---------------|----------------|----------------|----------------|-----------|-----------|-----------|-----------------------------------------------------------------------------------------------------------|
| c38442.graph_c0 | 1438.04255    | 1446.16627    | 1541.26606    | 271.849243     | 272.961106     | 255.043684     | 8.053E-97 | -3.48574  | down      | --                                                                                                        |
| c38443.graph_c1 | 5.15573105    | 5.25919648    | 5.33180396    | 28.385684      | 30.6941791     | 29.362998      | 6.913E-20 | 1.47082   | up        | PREDICTED: pantothenate kinase 2 [Sesamum indicum]                                                        |
| c38446.graph_c0 | 28.3744938    | 23.159293     | 28.6089191    | 117.833035     | 123.977732     | 119.995687     | 1.931E-11 | 1.155575  | up        | PREDICTED: flavonol synthase/flavanone 3-hydroxylase-like [Sesamum indicum]                               |
| c38447.graph_c1 | 0.51593167    | 0.22133498    | 0.31571077    | 5.25104275     | 5.77864301     | 5.90085109     | 2.648E-15 | 2.990665  | up        | PREDICTED: uncharacterized protein LOC105178397 [Sesamum indicum]                                         |
| c38448.graph_c0 | 817.785776    | 823.214906    | 818.062214    | 129.202261     | 58.0292291     | 36.5387535     | 1.32E-106 | -4.454807 | down      | PREDICTED: probable alpha,alpha-trehalose-phosphate synthase [UDP-forming] 11 [Sesamum indicum]           |
| c38449.graph_c0 | 5.42204461    | 5.42747397    | 5.16114222    | 2.22006273     | 3.18484734     | 2.55155636     | 1.576E-09 | -2.030923 | down      | PREDICTED: probably inactive leucine-rich repeat receptor-like protein kinase At5g48380 [Sesamum indicum] |
| c38450.graph_c1 | 225.332758    | 232.468593    | 226.179785    | 195.441906     | 118.392226     | 83.6732724     | 4.4E-19   | -1.787052 | down      | PREDICTED: uncharacterized protein LOC104242030 [Nicotiana sylvestris]                                    |
| c38451.graph_c0 | 5.35131419    | 5.02775422    | 4.48389791    | 50.323272      | 55.2050209     | 56.7059987     | 1.58E-62  | 2.430564  | up        | PREDICTED: delta(24)-sterol reductase [Sesamum indicum]                                                   |
| c38454.graph_c0 | 357.327064    | 350.468193    | 373.693893    | 339.336876     | 354.81679      | 353.624288     | 1.632E-12 | -1.064504 | down      | PREDICTED: endo-1,3;1,4-beta-D-glucanase-like isoform X1 [Nicotiana tomentosiformis]                      |
| c38457.graph_c0 | 6.7667424     | 6.94869546    | 7.04637929    | 2.09590184     | 1.42330376     | 1.1476436      | 2.996E-19 | -3.161433 | down      | -                                                                                                         |
| c38459.graph_c0 | 1.47218704    | 0.85963571    | 0.86708354    | 0              | 0              | 0              | 5.585E-17 | -Inf      | down      | PREDICTED: metalloendoproteinase 1-like [Glycine max]                                                     |
| c38460.graph_c0 | 29.9799067    | 24.2994157    | 27.9872092    | 11.1682198     | 7.88758311     | 5.09048945     | 2.195E-41 | -2.77536  | down      | PREDICTED: uncharacterized protein LOC105164190 [Sesamum indicum]                                         |
| c38462.graph_c0 | 35.8331971    | 38.8422571    | 36.5925441    | 17.1711976     | 21.9672547     | 23.5883666     | 2.596E-37 | -1.849268 | down      | PREDICTED: NPL4-like protein 2 [Sesamum indicum]                                                          |
| c38464.graph_c0 | 0             | 0.05540722    | 0.07112925    | 6.73116641     | 9.56182778     | 10.0730001     | 4.465E-38 | 6.665576  | up        | PREDICTED: cation/H(+) antiporter 14 isoform X1 [Nicotiana tomentosiformis]                               |
| c38465.graph_c0 | 0.97865154    | 0.76193562    | 2.23574395    | 9.91757394     | 11.8861041     | 10.3399326     | 7.606E-06 | 1.9842    | up        | PREDICTED: F-box protein PP2-A15-like [Nicotiana tomentosiformis]                                         |
| c38467.graph_c0 | 1.28403239    | 1.15349065    | 1.48079836    | 12.6482985     | 13.6564002     | 16.3552859     | 1.702E-20 | 2.422277  | up        | PREDICTED: uncharacterized protein LOC105163544 [Sesamum indicum]                                         |
| c38473.graph_c0 | 57.8817688    | 54.1850575    | 52.8317964    | 46.1422589     | 36.3206416     | 34.3046879     | 3.025E-23 | -1.509321 | down      | hypothetical protein CISIN_1g011138mg [Citrus sinensis]                                                   |
| c38474.graph_c0 | 50.1529913    | 51.4234289    | 49.1756088    | 50.2149887     | 48.1404566     | 47.8571999     | 1.006E-13 | -1.060342 | down      | PREDICTED: transcription elongation factor S-II [Sesamum indicum]                                         |
| c38475.graph_c0 | 4.32248864    | 3.4504996     | 4.00772702    | 19.4067216     | 19.5978652     | 17.6267995     | 1.045E-06 | 1.248389  | up        | hypothetical protein MIMGU_mgv1a011554mg [Erythranthe guttata]                                            |
| c38476.graph_c1 | 17.9179692    | 15.5727339    | 16.413305     | 351.391485     | 354.946528     | 374.494609     | 1.57E-116 | 3.419259  | up        | hypothetical protein CISIN_1g024108mg [Citrus sinensis]                                                   |
| c38478.graph_c0 | 0.47106089    | 0.38312023    | 0.49183216    | 11.879984      | 17.4701477     | 19.4279551     | 1.196E-21 | 4.153162  | up        | hypothetical protein MIMGU_mgv1a002464mg [Erythranthe guttata]                                            |
| c38479.graph_c1 | 545.50221     | 518.186758    | 554.788777    | 104.394227     | 97.407124      | 93.5138914     | 1.52E-101 | -3.470425 | down      | PREDICTED: putative G3BP-like protein isoform X1 [Sesamum indicum]                                        |

| #ID             | 0 h-1<br>FPKM | 0 h-2<br>FPKM | 0 h-3<br>FPKM | 48 h-1<br>FPKM | 48 h-2<br>FPKM | 48 h-3<br>FPKM | FDR       | log2FC    | regulated | nr_annotation                                                                                        |
|-----------------|---------------|---------------|---------------|----------------|----------------|----------------|-----------|-----------|-----------|------------------------------------------------------------------------------------------------------|
| c38482.graph_c0 | 3.85380163    | 5.65437928    | 3.52765697    | 42.0694933     | 49.1530876     | 50.329238      | 1.34E-36  | 2.422683  | up        | PREDICTED: 40S ribosomal protein S7 [Sesamum indicum]                                                |
| c38484.graph_c0 | 567.450345    | 568.018561    | 576.68671     | 221.443895     | 193.830647     | 176.328114     | 7.622E-63 | -2.547298 | down      | -                                                                                                    |
| c38486.graph_c0 | 9.02993316    | 8.7180649     | 6.79750497    | 29.5840059     | 35.9817975     | 34.6456297     | 1.638E-07 | 1.01153   | up        | PREDICTED: 40S ribosomal protein S8 [Sesamum indicum]                                                |
| c38489.graph_c0 | 4.28451968    | 4.72644365    | 3.90460746    | 2.53747221     | 2.96549232     | 3.45841833     | 1.486E-10 | -1.547435 | down      | PREDICTED: uncharacterized protein LOC105171501 [Sesamum indicum]                                    |
| c38491.graph_c1 | 0.31619775    | 0.27695008    | 0.25395414    | 6.1719609      | 5.47763465     | 8.00276166     | 4.64E-20  | 3.519545  | up        | PREDICTED: probably inactive leucine-rich repeat receptor-like protein kinase IMK2 [Sesamum indicum] |
| c38492.graph_c1 | 7.48986328    | 6.56548758    | 6.19900495    | 3.43058334     | 3.7168845      | 4.23189222     | 1.471E-11 | -1.850187 | down      | PREDICTED: uncharacterized protein LOC105168847 isoform X2 [Sesamum indicum]                         |
| c38493.graph_c0 | 4.26806306    | 4.21401146    | 3.40683503    | 2.83158981     | 2.68695841     | 2.87775883     | 1.057E-13 | -1.516405 | down      | PREDICTED: structural maintenance of chromosomes protein 2-1 [Sesamum indicum]                       |
| c38494.graph_c0 | 0.12021529    | 0.06016783    | 0             | 1.24593934     | 0.7626214      | 0.78835864     | 0.0001012 | 2.965194  | up        | Putative gag-pol polyprotein, identical [Solanum demissum]                                           |
| c38495.graph_c0 | 0.26403554    | 0.13214997    | 0.8482403     | 10.0947406     | 9.92108224     | 12.7699308     | 8.171E-11 | 3.683851  | up        | PREDICTED: cytochrome c oxidase subunit 5b-1, mitochondrial-like [Sesamum indicum]                   |
| c38495.graph_c1 | 0             | 0             | 0             | 4.54276825     | 6.54501648     | 5.65897902     | 1.953E-11 | Inf       | up        | PREDICTED: cytochrome c oxidase subunit 5b-2, mitochondrial [Malus domestica]                        |
| c38496.graph_c0 | 43.5725591    | 47.4600634    | 41.9943477    | 194.428224     | 202.072411     | 228.890751     | 1.001E-17 | 1.214646  | up        | PREDICTED: ADP,ATP carrier protein, mitochondrial [Sesamum indicum]                                  |
| c38500.graph_c0 | 19.7577445    | 20.0498889    | 19.1496955    | 13.6515922     | 15.463122      | 17.0025151     | 1.364E-20 | -1.37445  | down      | PREDICTED: uncharacterized protein LOC105159907 [Sesamum indicum]                                    |
| c38502.graph_c0 | 2.29561308    | 2.81494195    | 2.87620486    | 1.05743425     | 0.72814519     | 0.84680877     | 2.459E-08 | -2.614059 | down      | PREDICTED: protein ROOT HAIR DEFECTIVE 3 homolog 1-like [Sesamum indicum]                            |
| c38503.graph_c0 | 11.351094     | 10.2980033    | 10.8366718    | 7.47280337     | 8.7130091      | 7.50068456     | 1.421E-17 | -1.474872 | down      | PREDICTED: pentatricopeptide repeat-containing protein At5g42310, mitochondrial [Sesamum indicum]    |
| c38504.graph_c0 | 3.85063158    | 3.78244091    | 4.48576412    | 122.834703     | 155.697577     | 164.728121     | 3.84E-72  | 4.168836  | up        | PREDICTED: probable pectinesterase/pectinesterase inhibitor 51 [Sesamum indicum]                     |
| c38505.graph_c0 | 2.48048904    | 2.01271286    | 2.41479289    | 13.330265      | 15.0571394     | 13.309179      | 3.419E-17 | 1.574264  | up        | PREDICTED: nuclear pore complex protein NUP96 [Sesamum indicum]                                      |
| c38506.graph_c0 | 0.84158946    | 0.58970253    | 0.64888546    | 4.41936447     | 4.02468874     | 2.75952556     | 0.0082621 | 1.418069  | up        | -                                                                                                    |
| c38507.graph_c0 | 0             | 0.31884833    | 0.51165356    | 3.30131285     | 3.73049671     | 5.28747899     | 4.845E-07 | 2.85275   | up        | hyponeucal protein EUGKSOZ_000099 [Eucalyptus                                                        |
| c38509.graph_c0 | 0.02719466    | 0.08166567    | 0.10483864    | 1.70363749     | 4.14041745     | 3.90117823     | 1.812E-07 | 4.470659  | up        | PREDICTED: sulfate transporter 5.1-like [Sesamum indicum]                                            |
| c38512.graph_c0 | 0.09191375    | 0.09200579    | 0             | 3.59877017     | 4.70951018     | 3.95561442     | 1.044E-13 | 5.054429  | up        | PREDICTED: microtubule-associated protein RP/EB family member 1B [Sesamum indicum]                   |
| c38513.graph_c0 | 178.006279    | 170.99115     | 188.079318    | 791.104706     | 781.199487     | 832.868665     | 5.188E-15 | 1.144499  | up        | PREDICTED: 60S ribosomal protein L18-2-like [Sesamum indicum]                                        |
| c38514.graph_c1 | 5.15052449    | 6.70238655    | 7.05986975    | 2.68883283     | 3.35116746     | 3.23692161     | 1.991E-05 | -2.051285 | down      | -                                                                                                    |

| #ID             | 0 h-1<br>FPKM | 0 h-2<br>FPKM | 0 h-3<br>FPKM | 48 h-1<br>FPKM | 48 h-2<br>FPKM | 48 h-3<br>FPKM | FDR       | log2FC    | regulated | nr_annotation                                                                 |
|-----------------|---------------|---------------|---------------|----------------|----------------|----------------|-----------|-----------|-----------|-------------------------------------------------------------------------------|
| c38515.graph_c0 | 9.20949729    | 7.23236535    | 7.7807385     | 46.5938302     | 57.5541598     | 61.1456357     | 4.845E-25 | 1.749803  | up        | hypothetical protein MIMGU_mgv1a012548mg [Erythranthe guttata]                |
| c38516.graph_c0 | 0.02504371    | 0.02506879    | 0             | 11.2360153     | 12.2209402     | 12.2354257     | 8.118E-66 | 8.47369   | up        | PREDICTED: uncharacterized protein LOC105155823 [Sesamum indicum]             |
| c38524.graph_c0 | 222.006809    | 224.180776    | 212.295353    | 26.58374       | 28.5428201     | 34.2024806     | 3.72E-140 | -3.901591 | down      | Histone H3.3 [Arabidopsis thaliana]                                           |
| c38525.graph_c1 | 29.1873033    | 30.4911892    | 27.5164994    | 20.8383951     | 24.6267287     | 24.7499743     | 2.417E-21 | -1.33226  | down      | PREDICTED: pectinesterase 3-like [Sesamum indicum]                            |
| c38527.graph_c0 | 0.15792058    | 0.07903936    | 0.1014671     | 9.40814237     | 14.1024885     | 15.1244517     | 5.566E-30 | 5.812559  | up        | PREDICTED: auxin transporter-like protein 2 [Sesamum indicum]                 |
| c38531.graph_c0 | 35.6877425    | 37.389506     | 38.7857693    | 26.5971697     | 22.4599628     | 20.5700059     | 2.113E-31 | -1.698071 | down      | PREDICTED: ues1-like protein At4g17480 [Sesamum indicum]                      |
| c38532.graph_c0 | 15.411083     | 15.9814255    | 14.5893124    | 3.55453081     | 4.6961723      | 5.27133356     | 1.466E-62 | -2.788351 | down      | PREDICTED: autophagy-related protein 13 isoform X2 [Sesamum indicum]          |
| c38536.graph_c0 | 0.22331707    | 0.29805426    | 0.0318857     | 1.60015531     | 1.57408691     | 2.21707335     | 2.212E-05 | 2.277684  | up        | PREDICTED: uncharacterized protein LOC105175444 [Sesamum indicum]             |
| c38540.graph_c0 | 3.11451672    | 1.8339032     | 2.04037666    | 0              | 0              | 0              | 2.825E-20 | -Inf      | down      | hypothetical protein PAXRUDRAFT_143168 [Paxillus rubicundulus Ve08.2h10]      |
| c38540.graph_c1 | 1.45384243    | 0.81398037    | 0.82329444    | 0.70373913     | 0.93792015     | 0.80797787     | 0.0035033 | -1.353025 | down      | PREDICTED: neat snock protein δ3-like [Neiumoo suifera]                       |
| c38541.graph_c0 | 6.75266628    | 6.81244317    | 4.83214502    | 4.53766812     | 6.46116822     | 5.31833066     | 1.478E-07 | -1.192289 | down      | PREDICTED: probable glutathione S-transferase [Sesamum indicum]               |
| c38542.graph_c0 | 1.36876631    | 0.77070202    | 0.76952702    | 13.2404665     | 13.0247638     | 14.7266093     | 1.356E-18 | 2.803038  | up        | PREDICTED: nomoserine acetyltransferase [Sesamum indicum]                     |
| c38545.graph_c1 | 32.4407005    | 33.8787945    | 33.3593212    | 14.0642302     | 15.9886856     | 16.1741004     | 4.314E-44 | -2.128618 | down      | PREDICTED: protein SSUH2 homolog [Sesamum indicum]                            |
| c38547.graph_c0 | 35.5152993    | 35.436551     | 38.8881669    | 209.149171     | 256.675821     | 269.507527     | 1.318E-31 | 1.720389  | up        | -                                                                             |
| c38552.graph_c0 | 4.53231428    | 6.00035358    | 6.26258418    | 3.14282201     | 2.23548036     | 1.67787848     | 1.207E-11 | -2.261571 | down      | PREDICTED: uncharacterized protein LOC105175383 [Sesamum indicum]             |
| c38553.graph_c0 | 1.59876792    | 2.29242023    | 1.88790061    | 8.04117934     | 8.56082603     | 9.91781211     | 0.0002711 | 1.178166  | up        | PREDICTED: uncharacterized protein LOC105174166 [Sesamum indicum]             |
| c38556.graph_c0 | 2.95573304    | 3.12571573    | 2.84867548    | 45.6104855     | 55.1815809     | 78.5886325     | 2.564E-12 | 3.305245  | up        | PREDICTED: thaumatin-like protein [Sesamum indicum]                           |
| c38557.graph_c0 | 8.38302345    | 9.1863942     | 8.24003057    | 2.98080238     | 6.34430462     | 8.24624192     | 9.417E-13 | -1.585272 | down      | PREDICTED: MACPF domain-containing protein CAD1-like [Sesamum indicum]        |
| c38559.graph_c0 | 13.8974043    | 14.3373014    | 12.7964019    | 7.89698396     | 7.61830616     | 7.25592833     | 1.699E-37 | -1.864833 | down      | PREDICTED: filaggrin-like [Sesamum indicum]                                   |
| c38563.graph_c0 | 6.21138793    | 5.34405951    | 6.06886699    | 24.733732      | 27.7053951     | 24.9535375     | 7.626E-08 | 1.1155    | up        | PREDICTED: uncharacterized protein LOC105157934 [Sesamum indicum]             |
| c38568.graph_c1 | 7.18425653    | 5.62240674    | 5.03566586    | 4.633024       | 4.97186905     | 5.62150485     | 0.0001682 | -1.245501 | down      | PREDICTED: floral homeotic protein GLOBOSA [Sesamum indicum]                  |
| c38569.graph_c1 | 6.64626937    | 6.61772394    | 7.23023854    | 3.88760435     | 3.67228049     | 3.08442388     | 1.404E-14 | -1.961039 | down      | PREDICTED: transcription factor HBP-1b(c38)-like isoform X1 [Sesamum indicum] |
| c38571.graph_c0 | 12.6230727    | 12.3111257    | 10.5958326    | 5.82526793     | 8.36385004     | 9.26536531     | 2.263E-22 | -1.622032 | down      | PREDICTED: cation/H(+)-anupporter 18-like [Sesamum indicum]                   |

| #ID             | 0 h-1<br>FPKM | 0 h-2<br>FPKM | 0 h-3<br>FPKM | 48 h-1<br>FPKM | 48 h-2<br>FPKM | 48 h-3<br>FPKM | FDR       | log2FC    | regulated | nr_annotation                                                                                              |
|-----------------|---------------|---------------|---------------|----------------|----------------|----------------|-----------|-----------|-----------|------------------------------------------------------------------------------------------------------------|
| c38572.graph_c0 | 22.5052068    | 22.4802155    | 21.9036062    | 8.00461475     | 8.8969639      | 7.66734557     | 2.492E-42 | -2.463007 | down      | PREDICTED: cyclin-dependent kinase F-4-like [Sesamum indicum]                                              |
| c38576.graph_c0 | 108.547577    | 111.653137    | 111.229456    | 30.7301428     | 33.0202989     | 35.7919633     | 4.758E-77 | -2.754881 | down      | PREDICTED: HIPL1 protein-like [Solanum tuberosum]                                                          |
| c38580.graph_c0 | 3.26708642    | 3.66769111    | 2.98199523    | 37.9185232     | 44.9380392     | 48.6321858     | 5.938E-57 | 2.709159  | up        | PREDICTED: NADP-dependent glyceraldehyde-3-phosphate dehydrogenase [Sesamum indicum]                       |
| c38581.graph_c1 | 13.6162419    | 11.0460136    | 9.53650303    | 67.5363852     | 68.649477      | 66.3355728     | 1.005E-19 | 1.551632  | up        | -                                                                                                          |
| c38583.graph_c0 | 11.0792944    | 11.435305     | 10.626908     | 8.20464463     | 9.23506525     | 10.4074774     | 2.25E-13  | -1.271086 | down      | PREDICTED: internal alternative NAD(P)H-ubiquinone oxidoreductase A1, mitochondrial-like [Sesamum indicum] |
| c38584.graph_c0 | 24.3240699    | 23.9261997    | 23.8495714    | 188.662379     | 225.045286     | 237.024368     | 2.219E-50 | 2.153045  | up        | hypothetical protein M569_17345, partial [Genlisea aurea]                                                  |
| c38588.graph_c0 | 1.06743738    | 0.94639126    | 1.29331648    | 7.7828527      | 9.10818248     | 11.0502163     | 2.298E-12 | 2.054275  | up        | hypothetical protein MIMGU_mgv1a003578mg [Erythranthe guttata]                                             |
| c38590.graph_c0 | 21.3098578    | 21.779186     | 22.2080347    | 17.5387934     | 18.513027      | 17.4402426     | 1.025E-16 | -1.306068 | down      | PREDICTED: peroxisomal membrane protein 2 [Sesamum indicum]                                                |
| c38591.graph_c0 | 66.1167518    | 62.4407873    | 63.2072657    | 21.008905      | 15.6368062     | 13.9654744     | 5.317E-83 | -2.932018 | down      | PREDICTED: E3 ubiquitin-protein ligase RNF170-like [Sesamum indicum]                                       |
| c38593.graph_c0 | 5.2407659     | 4.25701115    | 4.02971469    | 30.710107      | 34.3364004     | 38.2770641     | 4.334E-24 | 1.914946  | up        | PREDICTED: long chain acyl-CoA synthetase 6, peroxisomal-like isoform X2 [Sesamum indicum]                 |
| c38596.graph_c0 | 0             | 0             | 0             | 8.60445187     | 7.9173529      | 7.52494057     | 3.231E-25 | Inf       | up        | PREDICTED: uncharacterized protein LOC105168232 isoform X2 [Sesamum indicum]                               |
| c38600.graph_c0 | 0.23745343    | 0.29051147    | 0.54246589    | 2.60078468     | 4.06844981     | 4.39042058     | 1.877E-08 | 2.33446   | up        | PREDICTED: phosphatidylinositol 4-kinase gamma 8 [Sesamum indicum]                                         |
| c38601.graph_c0 | 1.32814492    | 1.35660699    | 1.35840884    | 0.29965071     | 0.13226816     | 0.19997055     | 1.248E-13 | -3.682449 | down      | -                                                                                                          |
| c38602.graph_c0 | 0.81465389    | 1.25456868    | 1.12739038    | 5.59997637     | 6.4829337      | 8.47593995     | 0.0001118 | 1.66136   | up        | hypothetical protein MIMGU_mgv1a015466mg [Erythranthe guttata]                                             |
| c38603.graph_c0 | 19.6823514    | 18.282092     | 18.7529824    | 15.3229195     | 15.921272      | 14.971502      | 1.197E-19 | -1.312848 | down      | PREDICTED: uncharacterized protein LOC105171881 isoform X1 [Sesamum indicum]                               |
| c38604.graph_c1 | 3.29310271    | 4.14891756    | 3.35622928    | 19.1444567     | 17.2335046     | 15.7314273     | 4.238E-06 | 1.256867  | up        | PREDICTED: pentatricopeptide repeat-containing protein At4g21190 isoform X1 [Sesamum indicum]              |
| c38607.graph_c0 | 75.9802896    | 71.987783     | 71.4380957    | 63.8980867     | 77.8013291     | 73.7839991     | 2.739E-13 | -1.0463   | down      | hypothetical protein M569_16671 [Genlisea aurea]                                                           |
| c38608.graph_c0 | 16.7925579    | 16.8093731    | 15.6409274    | 8.61073128     | 12.8321033     | 11.0781289     | 7.085E-28 | -1.621501 | down      | PREDICTED: DNA ligase 1-like [Sesamum indicum]                                                             |
| c38610.graph_c0 | 1.12794784    | 0.74281402    | 1.37317039    | 9.48898093     | 10.9504799     | 11.3387579     | 3.872E-16 | 2.267987  | up        | hypothetical protein MIMGU_mgv1a005256mg [Erythranthe guttata]                                             |
| c38612.graph_c0 | 12.8415438    | 14.0229847    | 13.9631395    | 16.2565518     | 12.9273395     | 11.3364236     | 5.152E-08 | -1.023194 | down      | PREDICTED: uncharacterized protein LOC105173848 isoform X3 [Sesamum indicum]                               |
| c38614.graph_c0 | 13.8997873    | 13.7090926    | 12.7834287    | 13.9980497     | 10.573312      | 7.87537506     | 1.114E-08 | -1.324512 | down      | PREDICTED: sphingoid long-chain bases kinase 1-like [Sesamum indicum]                                      |



| #ID             | 0 h-1<br>FPKM | 0 h-2<br>FPKM | 0 h-3<br>FPKM | 48 h-1<br>FPKM | 48 h-2<br>FPKM | 48 h-3<br>FPKM | FDR       | log2FC    | regulated | nr_annotation                                                                             |
|-----------------|---------------|---------------|---------------|----------------|----------------|----------------|-----------|-----------|-----------|-------------------------------------------------------------------------------------------|
| c38617.graph_c0 | 0.25804548    | 0.54008991    | 0.45217999    | 6.18093648     | 3.59450552     | 3.23062832     | 0.0006135 | 2.37112   | up        | PREDICTED: plant intracellular Ras-group-related LRR protein 1-like [Sesamum indicum]     |
| c38620.graph_c0 | 7.86075107    | 8.68261785    | 8.57746181    | 6.89847366     | 7.83718931     | 5.69382434     | 3.889E-10 | -1.316432 | down      | PREDICTED: protein LTV1 homolog isoform X1 [Sesamum indicum]                              |
| c38629.graph_c0 | 21.7974091    | 18.6656745    | 18.7101612    | 93.1108533     | 106.617255     | 108.674504     | 2.206E-17 | 1.362772  | up        | hypothetical protein M569_15947, partial [Genlisea aurea]                                 |
| c38630.graph_c0 | 43.1488629    | 43.0498036    | 45.5491782    | 21.6826619     | 17.1166465     | 13.2814834     | 4E-59     | -2.350174 | down      | PREDICTED: WPP domain-interacting protein 1-like [Sesamum indicum]                        |
| c38632.graph_c1 | 1.04988829    | 1.00715045    | 0.89943202    | 13.2993517     | 12.4239809     | 11.0089113     | 2.549E-15 | 2.621469  | up        | PREDICTED: protein PHR1-LIKE 1-like isoform X1 [Sesamum indicum]                          |
| c38638.graph_c0 | 0.16199196    | 0             | 0.20816608    | 3.28322623     | 4.58487375     | 4.02798396     | 9E-11     | 3.974339  | up        | PREDICTED: ABC transporter I family member 17-like [Sesamum indicum]                      |
| c38642.graph_c0 | 0             | 0.09304754    | 0.29862539    | 5.78041025     | 4.76283403     | 4.57188825     | 4.164E-14 | 4.234924  | up        | hypothetical protein MIMGU_mgv1a025521mg [Erythranthe guttata]                            |
| c38644.graph_c0 | 241.157655    | 235.6063      | 248.322257    | 10.9613614     | 11.4314981     | 12.751466      | 2.41E-231 | -5.38627  | down      | PREDICTED: pncopnyunase, chloroplastic [Sesamum indicum]                                  |
| c38645.graph_c0 | 43.2521494    | 42.3623681    | 35.2170969    | 14.8852619     | 14.0102656     | 15.1805974     | 7.81E-51  | -2.469708 | down      | PREDICTED: cell number regulator 6-like [Sesamum indicum]                                 |
| c38646.graph_c0 | 2.07624441    | 2.80573667    | 2.80145909    | 0.09563859     | 0              | 0.17019728     | 2.398E-16 | -5.866523 | down      | PREDICTED: uncharacterized protein LOC105168686 [Sesamum indicum]                         |
| c38650.graph_c0 | 31.4532265    | 33.7951118    | 29.1363155    | 15.96849       | 15.3265994     | 15.8038952     | 3.883E-37 | -2.018618 | down      | PREDICTED: probable histone-lysine N-methyltransferase ATXR3 isoform X1 [Sesamum indicum] |
| c38664.graph_c0 | 0.71242512    | 1.1410216     | 1.92253841    | 9.97625377     | 9.17802182     | 8.7016104      | 3.832E-06 | 1.858549  | up        | PREDICTED: uncharacterized protein LOC105179255 [Sesamum indicum]                         |
| c38667.graph_c0 | 2.1087182     | 0.8795124     | 1.12907766    | 13.4369305     | 12.5197626     | 9.50726023     | 6.392E-05 | 2.096978  | up        | -                                                                                         |
| c38669.graph_c0 | 217.033901    | 218.697641    | 226.070098    | 33.6127237     | 36.3137259     | 36.719223      | 3.56E-130 | -3.652969 | down      | PREDICTED: BTB/POZ and TAZ domain-containing protein 1 [Sesamum indicum]                  |
| c38680.graph_c0 | 7.40715314    | 6.63919038    | 6.9677799     | 4.81690772     | 4.96118161     | 5.7147407      | 1.658E-07 | -1.458588 | down      | PREDICTED: zinc finger CCCH domain-containing protein 39-like [Sesamum indicum]           |
| c38681.graph_c1 | 0.39206183    | 0.32704535    | 0.25190749    | 17.1265648     | 19.7378525     | 18.2119468     | 1.166E-56 | 4.810226  | up        | PREDICTED: 3-ketoacyl-CoA synthase 12 [Sesamum indicum]                                   |
| c38697.graph_c0 | 1.61620645    | 1.01114052    | 2.07688928    | 12.6561158     | 10.055715      | 12.254983      | 0.0002417 | 1.8747    | up        | hypothetical protein AMTR_s00007p00249170 [Amborella trichopoda]                          |
| c38697.graph_c1 | 1.9088292     | 2.66707543    | 2.50402362    | 21.5420901     | 22.3943045     | 18.679042      | 2.371E-20 | 2.126378  | up        | PREDICTED: uncharacterized membrane protein At1g16860-like [Sesamum indicum]              |
| c38703.graph_c0 | 0.08523162    | 0.08531697    | 0.10952601    | 9.1084278      | 8.01333453     | 10.386961      | 1.276E-38 | 5.59799   | up        | PREDICTED: BTB/POZ domain-containing protein NPY2 [Sesamum indicum]                       |
| c38706.graph_c0 | 1.33702047    | 1.59739658    | 1.27473734    | 0.51654052     | 0.50511881     | 0.91922929     | 1.233E-05 | -2.137653 | down      | -                                                                                         |
| c38710.graph_c0 | 6.98902706    | 6.70229925    | 7.438608      | 85.2273917     | 104.294717     | 107.476397     | 4.821E-73 | 2.790834  | up        | PREDICTED: protein NRT1/ PTR FAMILY 8.3-like [Sesamum indicum]                            |
| c38711.graph_c0 | 22.1611926    | 21.4027367    | 21.4628989    | 175.424823     | 197.51191      | 201.374601     | 1.024E-48 | 2.123131  | up        | unnamed protein product [Coffea canephora]                                                |

| #ID             | 0 h-1<br>FPKM | 0 h-2<br>FPKM | 0 h-3<br>FPKM | 48 h-1<br>FPKM | 48 h-2<br>FPKM | 48 h-3<br>FPKM | FDR       | log2FC    | regulated | nr_annotation                                                                                |
|-----------------|---------------|---------------|---------------|----------------|----------------|----------------|-----------|-----------|-----------|----------------------------------------------------------------------------------------------|
| c38714.graph_c1 | 32.2512875    | 31.2928692    | 29.1644239    | 19.8079931     | 21.7169473     | 18.7161066     | 2.183E-28 | -1.639083 | down      | PREDICTED: putative E3 ubiquitin-protein ligase XBAT34 isoform X2 [Sesamum indicum]          |
| c38715.graph_c0 | 0.45691732    | 0.3201624     | 0.41100979    | 4.71455083     | 2.58643488     | 2.65931703     | 0.002027  | 2.062274  | up        | PREDICTED: F-box/kelch-repeat protein At3g24760 [Sesamum indicum]                            |
| c38732.graph_c2 | 3.51267211    | 2.58738474    | 2.12920884    | 0.85481957     | 1.42305065     | 1.6842152      | 5.39E-06  | -2.077624 | down      | PREDICTED: probable sucrose-phosphate synthase 1 isoform X1 [Sesamum indicum]                |
| c38737.graph_c0 | 0.38595323    | 0.20333669    | 0.41765489    | 2.84452235     | 3.03325169     | 4.2794539      | 4.269E-09 | 2.309951  | up        | PREDICTED: beta-1,3-galactosyltransferase 15 [Sesamum indicum]                               |
| c38740.graph_c1 | 0             | 0             | 0             | 10.943192      | 15.2157928     | 13.7943474     | 1.255E-13 | Inf       | up        | -                                                                                            |
| c38744.graph_c2 | 0.15741137    | 0.34665179    | 0.08091194    | 2.26227488     | 2.94966883     | 2.55490898     | 3.938E-07 | 2.717575  | up        | PREDICTED: uncharacterized protein LOC105160721 [Sesamum indicum]                            |
| c38756.graph_c0 | 1.41345916    | 1.67212444    | 1.0732983     | 7.99059335     | 7.02286853     | 5.10865367     | 0.0041561 | 1.265517  | up        | PREDICTED: ras-related protein Rab11D-like [Sesamum indicum]                                 |
| c38759.graph_c0 | 1.188999      | 1.56603895    | 1.36707807    | 4.554489       | 6.29073        | 7.79732472     | 0.0067632 | 1.152055  | up        | -                                                                                            |
| c38760.graph_c0 | 12.4644723    | 9.45761962    | 8.60718292    | 77.5619043     | 75.4139451     | 78.3953816     | 1.261E-34 | 1.907771  | up        | PREDICTED: NADPH-dependent 1-acyldihydroxyacetone phosphate reductase-like [Sesamum indicum] |
| c38761.graph_c0 | 0.16190234    | 0.08103223    | 0.15603819    | 13.3120835     | 12.9964568     | 15.7269905     | 1.185E-41 | 5.698808  | up        | PREDICTED: putative glucose-6-phosphate 1-epimerase [Sesamum indicum]                        |
| c38762.graph_c0 | 6.79808054    | 6.42102233    | 7.12303908    | 2.76207091     | 2.04145061     | 1.97185479     | 4.556E-22 | -2.597836 | down      | PREDICTED: exocyst complex component EXO70A1-like [Sesamum indicum]                          |
| c38763.graph_c0 | 2.79422498    | 2.89237603    | 3.2234601     | 17.1127278     | 23.0252018     | 24.4669986     | 1.42E-15  | 1.833413  | up        | PREDICTED: 54S ribosomal protein L10, mitochondrial [Sesamum indicum]                        |
| c38770.graph_c0 | 3.89767001    | 1.91177074    | 2.85493636    | 0              | 0              | 0              | 1.21E-18  | -Inf      | down      | cytochrome P450 [Aureobasidium pullulans var. namibiae CBS 147.97]                           |
| c38773.graph_c0 | 8.43545388    | 7.81749858    | 6.85132653    | 5.30384799     | 6.15623271     | 4.86296389     | 3.345E-15 | -1.517921 | down      | PREDICTED: uncharacterized protein LOC105166108 isoform X1 [Sesamum indicum]                 |
| c38775.graph_c0 | 16.4387003    | 15.5180791    | 15.3500625    | 86.4162398     | 86.2118233     | 85.1804811     | 4.542E-23 | 1.429433  | up        | PREDICTED: uncharacterized protein LOC105168156 [Sesamum indicum]                            |
| c38777.graph_c0 | 62.5234583    | 59.4662169    | 67.6015581    | 417.822512     | 423.643898     | 415.673703     | 1.026E-34 | 1.71058   | up        | hypothetical protein [Solanum tuberosum]                                                     |
| c38791.graph_c0 | 0.26355243    | 0.14070205    | 0.22578354    | 68.2920221     | 80.9896733     | 86.2301559     | 2.99E-218 | 7.524765  | up        | PREDICTED: probable methyltransferase PMT26 [Sesamum indicum]                                |
| c38792.graph_c0 | 0.29740035    | 0.09923272    | 0             | 3.10515879     | 2.99928576     | 3.49432117     | 1.738E-07 | 3.597896  | up        | PREDICTED: uncharacterized protein LOC105110235 [Populus euphratica]                         |
| c38793.graph_c0 | 44.4013752    | 45.1631675    | 41.1079392    | 55.2976097     | 34.2422547     | 26.9984714     | 1.092E-06 | -1.169755 | down      | PREDICTED: uncharacterized protein LOC105159283 [Sesamum indicum]                            |
| c38793.graph_c1 | 0.92475413    | 0.92568013    | 0.7130074     | 7.09953183     | 8.24311805     | 10.6127628     | 6.039E-08 | 2.320486  | up        | PREDICTED: uncharacterized protein LOC105166230 isoform X2 [Sesamum indicum]                 |

| #ID             | 0 h-1<br>FPKM | 0 h-2<br>FPKM | 0 h-3<br>FPKM | 48 h-1<br>FPKM | 48 h-2<br>FPKM | 48 h-3<br>FPKM | FDR       | log2FC    | regulated | nr_annotation                                                                                                 |
|-----------------|---------------|---------------|---------------|----------------|----------------|----------------|-----------|-----------|-----------|---------------------------------------------------------------------------------------------------------------|
| c38793.graph_c2 | 1.48580459    | 2.08220936    | 1.81385184    | 17.1786923     | 23.7091174     | 21.8320746     | 2.91E-27  | 2.519248  | up        | PREDICTED: uncharacterized protein LOC105166230 isoform X2 [Sesamum indicum]                                  |
| c38806.graph_c0 | 1.45459062    | 1.30392284    | 1.6739163     | 9.72046248     | 7.9669072      | 8.8805665      | 8.807E-11 | 1.567124  | up        | PREDICTED: uncharacterized protein LOC105171651 isoform X2 [Sesamum indicum]                                  |
| c38807.graph_c0 | 0             | 0             | 0             | 1.82142171     | 2.70140562     | 2.10689711     | 4.124E-11 | Inf       | up        | --                                                                                                            |
| c38814.graph_c0 | 0.99765733    | 0.99865633    | 0.82416161    | 5.84289452     | 5.98119202     | 4.76085675     | 6.487E-05 | 1.5417    | up        | PREDICTED: probable amino acid permease 7 [Sesamum indicum]                                                   |
| c38825.graph_c0 | 0.52418989    | 0.38161075    | 0.48989437    | 2.85360585     | 2.97654093     | 3.55476986     | 0.0005338 | 1.729364  | up        | PREDICTED: tRNA (guanine(9)-N1)-methyltransferase [Sesamum indicum]                                           |
| c38829.graph_c0 | 1.75342253    | 1.48515088    | 1.64658193    | 11.7735417     | 14.6446563     | 15.6449369     | 5.878E-16 | 2.08421   | up        | PREDICTED: heparan-alpha-glucosaminide N-acetyltransferase isoform X1 [Sesamum indicum]                       |
| c38844.graph_c0 | 0.89775221    | 1.02702991    | 1.81287406    | 8.27067888     | 9.63795954     | 9.98748616     | 0.0001019 | 1.87169   | up        | PREDICTED: 14 kDa zinc-binding protein [Sesamum indicum]                                                      |
| c38844.graph_c2 | 4.12499604    | 4.7026164     | 3.53385548    | 24.8069617     | 32.318769      | 29.211615      | 2.286E-08 | 1.784602  | up        | PREDICTED: 14 kDa zinc-binding protein isoform X2 [Tarenaya hassleriana]                                      |
| c38846.graph_c0 | 3.9000548     | 2.92797009    | 4.87251025    | 0.49902568     | 0.42292575     | 1.24328413     | 1.276E-10 | -3.461872 | down      | -                                                                                                             |
| c38847.graph_c0 | 85.8989643    | 87.0406362    | 89.5746276    | 26.9218182     | 26.52829       | 22.6720732     | 8.586E-83 | -2.802349 | down      | hypoteucal protein EUCR50Z_000099 [Eucalyptus grandis]                                                        |
| c38848.graph_c0 | 5.98185102    | 4.25802023    | 4.66908935    | 2.57173995     | 3.50285997     | 2.54257639     | 1.514E-08 | -1.810464 | down      | predicted protein [Hordeum vulgare subsp. vulgare]                                                            |
| c38855.graph_c0 | 0             | 0.07096172    | 0.36438958    | 17.3069288     | 15.0827968     | 12.2615692     | 3.353E-26 | 5.641999  | up        | PREDICTED: UDP-N-acetylglucosamine--peptide N-acetylglucosaminyltransferase 110 kDa subunit [Sesamum indicum] |
| c38857.graph_c0 | 2.01215942    | 1.63651662    | 1.29285226    | 0.07723885     | 0.2454756      | 0.24054334     | 1.844E-14 | -4.163896 | down      | -                                                                                                             |
| c38860.graph_c0 | 0.11184446    | 0             | 0             | 0.89299956     | 1.2371093      | 1.00851254     | 7.646E-08 | 3.809765  | up        | PREDICTED: probable indole-3-pyruvate monooxygenase YUCCA4 [Sesamum indicum]                                  |
| c38868.graph_c0 | 0.94802055    | 0.72568282    | 1.14658253    | 0.0770628      | 0.13606448     | 0.25142338     | 3.843E-11 | -3.635806 | down      | -                                                                                                             |
| c38873.graph_c1 | 0.5585085     | 0.35577039    | 0.78295149    | 3.50818949     | 2.8740944      | 2.83021976     | 0.0032494 | 1.421392  | up        | PREDICTED: raucaffricine-O-beta-D-glucosidase-like [Sesamum indicum]                                          |
| c38886.graph_c0 | 0             | 0             | 0             | 5.7680022      | 10.2175556     | 13.083244      | 4.489E-14 | Inf       | up        | hypothetical protein MIMGU_mgv1a023829mg, partial [Erythranthe guttata]                                       |
| c38888.graph_c0 | 11.9477598    | 10.8956913    | 9.28850018    | 57.9339335     | 47.6384898     | 41.7029725     | 1.649E-05 | 1.186356  | up        | PREDICTED: putative zinc transporter At3g08650 [Sesamum indicum]                                              |
| c38892.graph_c0 | 0             | 0             | 0             | 2.06127251     | 1.91070975     | 2.67474066     | 5.33E-13  | Inf       | up        | PREDICTED: peroxidase 19 [Sesamum indicum]                                                                    |
| c38898.graph_c0 | 6.23957423    | 5.81594781    | 6.07038334    | 25.7859087     | 32.1493004     | 31.5585553     | 9.225E-16 | 1.282363  | up        | PREDICTED: CDPK-related kinase 1 [Sesamum indicum]                                                            |
| c38902.graph_c0 | 1.79614463    | 0.8989716     | 1.61568188    | 11.7485517     | 13.8485508     | 13.9874664     | 1.706E-05 | 2.177273  | up        | PREDICTED: copper transporter b-like [Nicotiana glauca]                                                       |
| c38904.graph_c0 | 28.1343657    | 29.5194352    | 27.1953166    | 15.1386553     | 17.3065355     | 15.7153318     | 1.942E-35 | -1.835761 | down      | PREDICTED: 20S-pre-rRNA D-site endonuclease nob1 [Sesamum indicum]                                            |
| c38906.graph_c0 | 0.77160191    | 0.80595605    | 0.47421431    | 0.61813044     | 0.42564226     | 0.19250306     | 0.0002944 | -1.729935 | down      | gag-pol polyprotein [Oryza sativa Japonica Group]                                                             |

| #ID             | 0 h-1<br>FPKM | 0 h-2<br>FPKM | 0 h-3<br>FPKM | 48 h-1<br>FPKM | 48 h-2<br>FPKM | 48 h-3<br>FPKM | FDR       | log2FC    | regulated | nr_annotation                                                                                                      |
|-----------------|---------------|---------------|---------------|----------------|----------------|----------------|-----------|-----------|-----------|--------------------------------------------------------------------------------------------------------------------|
| c38908.graph_c0 | 23.2929401    | 22.8641486    | 20.1483687    | 21.3400894     | 15.4913101     | 20.4692636     | 1.649E-11 | -1.222595 | down      | PREDICTED: uncharacterized protein LOC105158092 [Sesamum indicum]                                                  |
| c38916.graph_c0 | 12.4528336    | 12.8500348    | 12.0017882    | 7.15252234     | 8.21491782     | 8.25464901     | 6.252E-18 | -1.678772 | down      | PREDICTED: uncharacterized acetyltransferase At3g50280-like [Sesamum indicum]                                      |
| c38923.graph_c0 | 57.3795797    | 56.9894027    | 51.0003629    | 32.5719393     | 28.5868057     | 26.874511      | 1.838E-42 | -1.922662 | down      | PREDICTED: large subunit GTPase 1 homolog isoform X1 [Cicer arietinum]                                             |
| c38930.graph_c0 | 1.30892097    | 1.94936905    | 2.01021337    | 10.7351252     | 12.8992911     | 11.5671398     | 3.524E-11 | 1.717113  | up        | PREDICTED: uncharacterized protein LOC105159306 [Sesamum indicum]                                                  |
| c38931.graph_c0 | 1.76168665    | 2.29248592    | 1.47149411    | 35.056382      | 40.4047531     | 42.2043608     | 1.97E-58  | 3.394824  | up        | PREDICTED: uncharacterized protein LOC105171035 [Sesamum indicum]                                                  |
| c38934.graph_c0 | 27.9185733    | 28.9288329    | 26.3556508    | 16.7702502     | 18.0054812     | 14.2383073     | 1.196E-27 | -1.779775 | down      | PREDICTED: formin-like protein 14 isoform X2 [Sesamum indicum]                                                     |
| c38934.graph_c1 | 23.6241239    | 23.3396655    | 18.4916409    | 14.1785562     | 13.293108      | 13.3098737     | 7.266E-17 | -1.696233 | down      | PREDICTED: formin-like protein 5 [Sesamum indicum]                                                                 |
| c38944.graph_c0 | 4.21522924    | 4.81165368    | 3.80121857    | 1.43070573     | 2.88696997     | 2.00048098     | 9.231E-07 | -2.047731 | down      | hypothetical protein MIMGU_mgv1a003797mg [Erythranthe guttata]                                                     |
| c38944.graph_c1 | 14.2897216    | 15.1454442    | 14.6238145    | 3.21669536     | 3.66012081     | 4.92933788     | 1.143E-29 | -2.92203  | down      | PREDICTED: probable protein S-acyltransferase 22 isoform X2 [Sesamum indicum]                                      |
| c38952.graph_c0 | 7.6726155     | 7.21198758    | 7.75542863    | 3.06014929     | 3.4701569      | 4.14187976     | 9.144E-14 | -2.106498 | down      | hypothetical protein MIMGU_mgv1a006823mg [Erythranthe guttata]                                                     |
| c38956.graph_c0 | 42.9873913    | 36.8091687    | 36.3833011    | 153.75902      | 222.998336     | 271.929471     | 2.754E-05 | 1.457002  | up        | PREDICTED: REF/SRPP-like protein At1g67360 [Sesamum indicum]                                                       |
| c38961.graph_c0 | 28.1427639    | 25.1174506    | 26.8073005    | 26.3348912     | 27.562496      | 21.9403607     | 6.235E-12 | -1.094824 | down      | PREDICTED: protein KTI12 homolog [Sesamum indicum]                                                                 |
| c38963.graph_c0 | 19.6139553    | 18.4517676    | 19.4785907    | 188.310365     | 158.196002     | 127.627124     | 2.242E-09 | 2.030165  | up        | PREDICTED: uncharacterized protein LOC105177709 [Sesamum indicum]                                                  |
| c38964.graph_c0 | 1.83947561    | 1.39121772    | 1.83851033    | 12.0508083     | 12.3674211     | 12.6327242     | 6.602E-19 | 1.850578  | up        | PREDICTED: DNA gyrase subunit B, chloroplastic/mitochondrial-like isoform X1 [Sesamum indicum]                     |
| c38967.graph_c1 | 0.90296948    | 1.02439015    | 0.69621092    | 10.5093463     | 10.3989864     | 8.78366893     | 2.971E-16 | 2.487666  | up        | PREDICTED: phosphomevalonate kinase [Sesamum indicum]                                                              |
| c38969.graph_c0 | 14.3940413    | 13.4971508    | 12.5842245    | 7.23106457     | 7.15614407     | 7.42247668     | 1.937E-30 | -1.908366 | down      | PREDICTED: chaperone protein ClpB4, mitochondrial [Sesamum indicum]                                                |
| c38969.graph_c1 | 19.2277736    | 19.1335871    | 18.2522148    | 10.1619896     | 10.5073212     | 10.7142422     | 7.076E-28 | -1.868801 | down      | PREDICTED: chaperone protein ClpB4, mitochondrial [Sesamum indicum]                                                |
| c38972.graph_c0 | 103.586863    | 96.6875213    | 110.202666    | 48.8589957     | 45.4828828     | 40.0519846     | 2.044E-47 | -2.223989 | down      | PREDICTED: zinc finger AZU and AN1 domain-containing stress-associated protein 8-like isoform X1 [Sesamum indicum] |
| c38985.graph_c0 | 10.0946014    | 7.90803362    | 8.8628315     | 36.5060678     | 40.264761      | 37.9823544     | 2.037E-08 | 1.076407  | up        | PREDICTED: uncharacterized protein LOC105174450 [Sesamum indicum]                                                  |
| c38986.graph_c0 | 17.807236     | 15.1012368    | 14.6039841    | 11.6863919     | 11.2086765     | 11.3497618     | 3.833E-17 | -1.487569 | down      | PREDICTED: ABC transporter I family member 1 [Sesamum indicum]                                                     |

| #ID             | 0 h-1<br>FPKM | 0 h-2<br>FPKM | 0 h-3<br>FPKM | 48 h-1<br>FPKM | 48 h-2<br>FPKM | 48 h-3<br>FPKM | FDR       | log2FC    | regulated | nr_annotation                                                                               |
|-----------------|---------------|---------------|---------------|----------------|----------------|----------------|-----------|-----------|-----------|---------------------------------------------------------------------------------------------|
| c38987.graph_c0 | 1.40863495    | 1.16121393    | 1.17127462    | 36.4890128     | 39.9495986     | 42.0449976     | 2.649E-40 | 3.966856  | up        | PREDICTED: NADPH:quinone oxidoreductase [Sesamum indicum]                                   |
| c38988.graph_c1 | 0.75812376    | 0.67456258    | 0.61339718    | 30.9121297     | 35.3510231     | 33.1676322     | 1.13E-100 | 4.585098  | up        | PREDICTED: probable protein S-acyltransferase 7 [Sesamum indicum]                           |
| c38992.graph_c0 | 2.13092138    | 1.59979138    | 2.00107878    | 8.7586414      | 8.27885661     | 9.80891742     | 0.0001096 | 1.209635  | up        | PREDICTED: trans domain-containing protein [Sesamum indicum]                                |
| c38995.graph_c0 | 2.20585906    | 2.2080679     | 2.6226823     | 9.42020465     | 12.8366173     | 11.7618969     | 5.483E-10 | 1.248905  | up        | PREDICTED: SNF2 domain-containing protein CLASSY 3-like [Sesamum indicum]                   |
| c38996.graph_c0 | 11.6308942    | 13.628801     | 10.5133091    | 11.1651179     | 12.6325178     | 12.1868435     | 2.827E-09 | -1.009321 | down      | PREDICTED: uncharacterized protein LOC105173283 [Sesamum indicum]                           |
| c39001.graph_c0 | 0             | 0             | 0             | 1.68758128     | 2.02391065     | 2.54988625     | 2.051E-14 | Inf       | up        | PREDICTED: putative UDP-glucuronate:xylan alpha-glucuronosyltransferase 4 [Sesamum indicum] |
| c39015.graph_c0 | 0.6633793     | 0.88539143    | 0.87141241    | 0.02716215     | 0.0143875      | 0              | 2.099E-25 | -6.857571 | down      | PREDICTED: uncharacterized protein LOC103452707 [Malus domestica]                           |
| c39021.graph_c0 | 9.53150499    | 9.37424778    | 10.363998     | 45.9009123     | 49.1468676     | 48.5190794     | 5.542E-17 | 1.274617  | up        | PREDICTED: uncharacterized protein LOC105158512 [Sesamum indicum]                           |
| c39024.graph_c0 | 71.5366187    | 73.8872967    | 66.4862285    | 32.0097425     | 41.6071125     | 37.7056168     | 3.763E-43 | -1.949419 | down      | PREDICTED: uncharacterized protein LOC105169073 [Sesamum indicum]                           |
| c39028.graph_c0 | 8.6009005     | 10.4413243    | 10.5821786    | 1.01153752     | 1.78600224     | 0.90006        | 9.135E-16 | -4.027637 | down      | -                                                                                           |
| c39028.graph_c1 | 9.99733907    | 6.60485093    | 8.22206497    | 0.18420402     | 0.19514182     | 0.32780725     | 1.446E-20 | -6.155522 | down      | -                                                                                           |
| c39029.graph_c0 | 19.4573194    | 18.1234299    | 18.2804503    | 10.8851834     | 10.4988574     | 10.119253      | 2.037E-20 | -1.842351 | down      | PREDICTED: CBL-interacting serine/threonine-protein kinase 1-like [Sesamum indicum]         |
| c39033.graph_c0 | 15.8978921    | 18.5661133    | 17.9973468    | 12.3795052     | 7.11142969     | 4.57674187     | 4.089E-16 | -2.127178 | down      | hypothetical protein MIMGU_mgv1a025187mg [Erythranthe guttata]                              |
| c39040.graph_c0 | 0.5066508     | 0.84526356    | 0.65106634    | 18.4370106     | 26.1247821     | 23.0502617     | 1.705E-24 | 4.05368   | up        | PREDICTED: uncharacterized protein LOC105178874 isoform X1 [Sesamum indicum]                |
| c39047.graph_c0 | 2.45067276    | 2.1720393     | 2.29630007    | 17.7795418     | 20.3550456     | 19.8797922     | 6.402E-26 | 2.048226  | up        | PREDICTED: transcription factor LHW-like [Nicotiana sylvestris]                             |
| c39052.graph_c0 | 0.62843976    | 0.41937936    | 0.71783997    | 8.42707999     | 12.8119408     | 9.67346337     | 6.584E-12 | 3.103555  | up        | unnamed protein product [Vitis vinifera]                                                    |
| c39052.graph_c1 | 1.18180146    | 1.26457002    | 0.68077937    | 13.2902902     | 12.6078699     | 12.1262717     | 3.254E-16 | 2.593505  | up        | hypothetical protein MIMGU_mgv1a002912mg [Erythranthe guttata]                              |
| c39055.graph_c0 | 7.39969894    | 6.56058192    | 7.33544186    | 31.1151251     | 32.4984387     | 31.4988407     | 3.648E-09 | 1.140694  | up        | PREDICTED: ubiquitin thioesterase OTU1 isoform X1 [Sesamum indicum]                         |
| c39060.graph_c0 | 16.2703123    | 17.1321845    | 15.1972337    | 13.3989889     | 13.29848       | 10.718063      | 2.013E-16 | -1.392033 | down      | hypothetical protein MIMGU_mgv1a009934mg [Erythranthe guttata]                              |
| c39068.graph_c0 | 1.41249524    | 0.99805387    | 1.17448444    | 3.54025454     | 5.21011294     | 6.14694642     | 0.0015367 | 1.0304    | up        | PREDICTED: protein NRT1/ PTR FAMILY 5.8 [Nicotiana sylvestris]                              |
| c39070.graph_c0 | 14.0818408    | 17.0703147    | 11.4550907    | 4.28469696     | 6.80867533     | 9.21353585     | 3.025E-10 | -2.093727 | down      | -                                                                                           |

| #ID             | 0 h-1<br>FPKM | 0 h-2<br>FPKM | 0 h-3<br>FPKM | 48 h-1<br>FPKM | 48 h-2<br>FPKM | 48 h-3<br>FPKM | FDR       | log2FC    | regulated | nr_annotation                                                                                           |
|-----------------|---------------|---------------|---------------|----------------|----------------|----------------|-----------|-----------|-----------|---------------------------------------------------------------------------------------------------------|
| c39073.graph_c0 | 1.75695129    | 2.08439776    | 2.92671551    | 10.8507363     | 17.2743133     | 21.1234712     | 4.269E-05 | 1.831312  | up        | LEC14B protein [ <i>Morus notabilis</i> ]                                                               |
| c39074.graph_c0 | 0.34321666    | 0.34356034    | 0.441047      | 2.25852554     | 2.82330806     | 2.04981489     | 0.0017531 | 1.638355  | up        | -                                                                                                       |
| c39078.graph_c0 | 24.7075079    | 24.249197     | 26.4170969    | 101.985182     | 103.519604     | 104.2746       | 1.499E-10 | 1.020533  | up        | PREDICTED: uncharacterized protein LOC100800807 isoform X2 [ <i>Glycine max</i> ]                       |
| c39087.graph_c0 | 81.4900172    | 86.8394515    | 79.3069015    | 10.2840985     | 11.6729522     | 13.9875429     | 3.894E-86 | -3.805003 | down      | ubiquitin [ <i>Galdieria sulphuraria</i> ]                                                              |
| c39094.graph_c0 | 3.98382019    | 3.29427732    | 5.56452899    | 18.0316311     | 23.8356466     | 23.8536762     | 0.0006096 | 1.328188  | up        | -                                                                                                       |
| c39102.graph_c1 | 12419.2522    | 12680.8182    | 12985.2777    | 41.4941264     | 32.7472315     | 28.8266381     | 5.71E-221 | -9.541503 | down      | 15 kDa oleosin [ <i>Sesamum indicum</i> ]                                                               |
| c39103.graph_c0 | 1.88858879    | 1.73719777    | 2.23013477    | 18.8566584     | 21.0224858     | 20.7116657     | 3.446E-18 | 2.349542  | up        | hypothetical protein MIMGU_mgv1a011278mg [ <i>Erythranthe guttata</i> ]                                 |
| c39104.graph_c0 | 0             | 0.06766919    | 0.02895686    | 1.24557809     | 0.90168495     | 0.84970272     | 9.429E-09 | 3.942928  | up        | PREDICTED: probable KINA penicase SDE5 [ <i>Sesamum indicum</i> ]                                       |
| c39110.graph_c0 | 1.54254487    | 1.22955274    | 2.16577115    | 16.7636334     | 16.2814405     | 18.0071312     | 5.112E-27 | 2.347492  | up        | PREDICTED: tubulin gamma-1 chain [ <i>Sesamum indicum</i> ]                                             |
| c39112.graph_c0 | 10.6251316    | 9.24459426    | 6.3371672     | 101.809329     | 124.831353     | 144.869425     | 4.918E-27 | 2.807859  | up        | PREDICTED: probable voltage-gated potassium channel subunit beta [ <i>Sesamum indicum</i> ]             |
| c39115.graph_c0 | 3.65323793    | 2.58133842    | 3.3138038     | 0.09898827     | 0              | 0.26423749     | 4.922E-17 | -5.734947 | down      | PREDICTED: stem-specific protein TSJT1-like [ <i>Sesamum indicum</i> ]                                  |
| c39123.graph_c0 | 0.49034458    | 0.65444744    | 0.57760284    | 2.63513487     | 5.06477065     | 4.82343874     | 7.474E-05 | 1.833281  | up        | PREDICTED: probable 1-deoxy-D-xylulose-5-phosphate synthase 2, chloroplastic [ <i>Sesamum indicum</i> ] |
| c39130.graph_c0 | 1.13022838    | 0.95730473    | 1.00549953    | 9.5313517      | 6.70325714     | 6.41415587     | 7.186E-06 | 1.863142  | up        | PREDICTED: xylosyltransferase 1 [ <i>Sesamum indicum</i> ]                                              |
| c39132.graph_c0 | 84.8566816    | 87.7806117    | 84.7716573    | 49.1732318     | 39.8586771     | 33.8501015     | 1.271E-47 | -2.078519 | down      | PREDICTED: misucine kinase 3 isoform AL [ <i>Sesamum indicum</i> ]                                      |
| c39133.graph_c0 | 0.95594446    | 0.8657682     | 0.93594398    | 0.46130773     | 0              | 0              | 2.204E-10 | -3.540131 | down      | -                                                                                                       |
| c39134.graph_c0 | 150.985195    | 143.330085    | 159.722013    | 69.9931054     | 85.9189237     | 88.1797847     | 1.363E-40 | -1.917647 | down      | PREDICTED: high mobility group B protein 1 [ <i>Sesamum indicum</i> ]                                   |
| c39136.graph_c0 | 9.42813239    | 10.8532092    | 7.55200958    | 39.0282419     | 42.3271899     | 43.9498694     | 3.035E-13 | 1.154122  | up        | PREDICTED: patatin-like protein 6 [ <i>Sesamum indicum</i> ]                                            |
| c39138.graph_c0 | 0             | 0             | 0             | 2.60222856     | 5.22633025     | 5.8368568      | 1.753E-13 | Inf       | up        | PREDICTED: COBRA-like protein 4 [ <i>Sesamum indicum</i> ]                                              |
| c39138.graph_c1 | 0             | 0             | 0             | 9.21845303     | 19.8846483     | 24.2122699     | 8.347E-11 | Inf       | up        | hypothetical protein MIMGU_mgv1a006245mg [ <i>Erythranthe guttata</i> ]                                 |
| c39142.graph_c0 | 7.70827725    | 8.41217601    | 9.08619441    | 5.1257993      | 5.88267639     | 6.84135809     | 8.487E-08 | -1.520498 | down      | PREDICTED: uncharacterized protein LOC105155593 [ <i>Sesamum indicum</i> ]                              |
| c39144.graph_c0 | 27.0993377    | 27.5085366    | 24.4721188    | 17.5259426     | 19.7625596     | 19.8924285     | 1.432E-25 | -1.486374 | down      | PREDICTED: ankyrin repeat domain-containing protein 50 [ <i>Sesamum indicum</i> ]                       |
| c39146.graph_c0 | 1.80691612    | 1.28255079    | 1.09765323    | 16.6767562     | 18.7571608     | 22.1371274     | 1.809E-31 | 2.764528  | up        | PREDICTED: phytoene synthase 2, chloroplastic [ <i>Sesamum indicum</i> ]                                |
| c39147.graph_c0 | 0             | 0             | 0             | 1.69821245     | 1.99894463     | 1.95878048     | 5.541E-17 | Inf       | up        | hypothetical protein MIMGU_mgv1a023002mg [ <i>Erythranthe guttata</i> ]                                 |
| c39157.graph_c0 | 0.5576278     | 0.41863964    | 0.3582869     | 6.38943109     | 7.2110122      | 6.91375438     | 4.071E-13 | 2.926474  | up        | PREDICTED: probable beta-1,3-galactosyltransferase 11 [ <i>Sesamum indicum</i> ]                        |

| #ID             | 0 h-1<br>FPKM | 0 h-2<br>FPKM | 0 h-3<br>FPKM | 48 h-1<br>FPKM | 48 h-2<br>FPKM | 48 h-3<br>FPKM | FDR       | log2FC    | regulated | nr_annotation                                                                        |
|-----------------|---------------|---------------|---------------|----------------|----------------|----------------|-----------|-----------|-----------|--------------------------------------------------------------------------------------|
| c39161.graph_c0 | 48.4175286    | 47.8879764    | 50.8022134    | 50.7846636     | 51.8926923     | 44.6052886     | 1.661E-12 | -1.015559 | down      | PREDICTED: phytanoyl-CoA dioxygenase [Sesamum indicum]                               |
| c39166.graph_c1 | 18.5246289    | 18.0239695    | 16.1397097    | 80.927429      | 82.0084294     | 103.928261     | 2.375E-13 | 1.322362  | up        | hypothetical protein MIMGU_mgv1a005459mg [Erythranthe guttata]                       |
| c39167.graph_c0 | 14.0149597    | 14.9351726    | 13.2703628    | 6.67196872     | 10.6349356     | 9.75703965     | 5.079E-21 | -1.665942 | down      | PREDICTED: uncharacterized protein LOC105176476 isoform X2 [Sesamum indicum]         |
| c39168.graph_c0 | 34.043788     | 32.5673988    | 31.9239356    | 24.7177168     | 23.4196108     | 21.450622      | 1.472E-24 | -1.51694  | down      | PREDICTED: uncharacterized protein LOC105169489 [Sesamum indicum]                    |
| c39170.graph_c0 | 65.9160176    | 62.6829214    | 66.9937112    | 2.34623703     | 1.973822       | 2.39467754     | 7.31E-194 | -5.880396 | down      | PREDICTED: protein REVEILLE 6 isoform X2 [Nicotiana sylvestris]                      |
| c39171.graph_c0 | 0             | 0             | 0             | 5.464825       | 6.4982157      | 4.56486015     | 1.093E-12 | Inf       | up        | -                                                                                    |
| c39174.graph_c0 | 16.9039931    | 18.7466838    | 16.8672197    | 15.3030079     | 16.1481061     | 12.3883673     | 1.609E-15 | -1.276686 | down      | PREDICTED: B3 domain-containing protein Os01g0234100-like [Sesamum indicum]          |
| c39178.graph_c0 | 15.6781098    | 18.6506137    | 17.2271379    | 2.51194737     | 2.88286229     | 1.67633675     | 2.241E-18 | -3.882929 | down      | hypothetical protein SERLADRAFT_461711 [Serpula lacrymans var. lacrymans S7.9]       |
| c39191.graph_c1 | 3.09783151    | 3.52480213    | 2.89255       | 16.4254644     | 18.1403214     | 17.1181461     | 8.695E-15 | 1.423758  | up        | PREDICTED: protein FAR1-RELATED SEQUENCE 5-like [Prunus mume]                        |
| c39191.graph_c2 | 1.24203038    | 0.88805292    | 0.22800832    | 6.04812253     | 7.79260432     | 9.59958058     | 7.968E-05 | 2.302154  | up        | -                                                                                    |
| c39195.graph_c0 | 1.89823259    | 1.9544229     | 2.26506803    | 12.6661324     | 12.3595938     | 10.9145798     | 3.685E-11 | 1.536696  | up        | PREDICTED: armadillo repeat-containing protein LFR [Sesamum indicum]                 |
| c39211.graph_c0 | 0             | 0             | 0.03970538    | 1.02475501     | 1.17607064     | 0.9371492      | 2.982E-10 | 5.253477  | up        | PREDICTED: uncharacterized protein LOC105159159 [Sesamum indicum]                    |
| c39213.graph_c0 | 2.3393633     | 1.36599506    | 1.25257269    | 0              | 0              | 0              | 1.001E-13 | -Inf      | down      | PREDICTED: uncharacterized protein LOC104436401 [Eucalyptus grandis]                 |
| c39216.graph_c0 | 0.41945304    | 0.74285234    | 0.82925195    | 25.1177877     | 29.2859206     | 32.2945924     | 7.261E-81 | 4.418161  | up        | PREDICTED: cell division protein FtsZ homolog 2-2, chloroplastic [Sesamum indicum]   |
| c39217.graph_c0 | 15.3370613    | 12.7351668    | 14.7508174    | 13.0719918     | 12.7590068     | 10.376759      | 1.108E-13 | -1.257727 | down      | PREDICTED: uncharacterized protein LOC105168440 [Sesamum indicum]                    |
| c39218.graph_c0 | 28.9893274    | 25.5058176    | 27.2603777    | 23.7312669     | 29.9271941     | 25.038404      | 1.876E-12 | -1.075367 | down      | PREDICTED: F-box protein At4g00730-like [Sesamum indicum]                            |
| c39224.graph_c0 | 0.91197553    | 1.46406684    | 1.37093073    | 0.07926145     | 0.11755505     | 0              | 5.593E-21 | -5.267938 | down      | hypothetical protein VITISV_033646 [Vitis vinifera]                                  |
| c39225.graph_c0 | 4.94504722    | 4.80179538    | 5.32719404    | 55.1048748     | 59.2150177     | 63.8872217     | 4.405E-60 | 2.543107  | up        | PREDICTED: serine hydroxymethyltransferase, mitochondrial [Sesamum indicum]          |
| c39227.graph_c1 | 1.81839612    | 2.18426037    | 1.76551499    | 0.03722722     | 0              | 0.03312456     | 2.324E-24 | -7.354052 | down      | PREDICTED: phospholipase D delta-like isoform X2 [Sesamum indicum]                   |
| c39231.graph_c0 | 3.20044132    | 2.51165853    | 3.15854885    | 55.6904237     | 57.273062      | 79.5450595     | 1.104E-22 | 3.4184    | up        | PREDICTED: glucose-1-phosphate adenylyltransferase large subunit 1 [Sesamum indicum] |
| c39235.graph_c0 | 1.58915372    | 1.08840449    | 2.14960573    | 8.86124668     | 8.97926784     | 8.63887118     | 0.0005885 | 1.433241  | up        | -                                                                                    |

| #ID             | 0 h-1<br>FPKM | 0 h-2<br>FPKM | 0 h-3<br>FPKM | 48 h-1<br>FPKM | 48 h-2<br>FPKM | 48 h-3<br>FPKM | FDR       | log2FC    | regulated | nr_annotation                                                                               |
|-----------------|---------------|---------------|---------------|----------------|----------------|----------------|-----------|-----------|-----------|---------------------------------------------------------------------------------------------|
| c39252.graph_c0 | 1.05350156    | 0.35151883    | 0.67689561    | 28.2431317     | 30.4685386     | 34.3998049     | 4.075E-80 | 4.465192  | up        | hypothetical protein MIMGU_mgv1a009282mg [Erythranthe guttata]                              |
| c39255.graph_c0 | 14.9621014    | 14.1074465    | 16.1257809    | 184.706453     | 176.832098     | 192.362316     | 4.41E-61  | 2.597079  | up        | hypothetical protein MIMGU_mgv1a016658mg [Erythranthe guttata]                              |
| c39260.graph_c0 | 0.11986528    | 0.0399951     | 0             | 11.5212911     | 12.2444058     | 16.6055872     | 1.7E-35   | 6.978293  | up        | PREDICTED: probable galactinol--sucrose galactosyltransferase 2 [Sesamum indicum]           |
| c39272.graph_c0 | 5.02700417    | 4.80839182    | 4.47407846    | 19.553973      | 24.1130606     | 27.6247401     | 2.651E-11 | 1.295563  | up        | PREDICTED: ATP-dependent zinc metalloprotease FtsH [Sesamum indicum]                        |
| c39274.graph_c0 | 2.43911463    | 2.40052246    | 2.39686266    | 10.0079655     | 10.4221881     | 12.04699       | 2.183E-08 | 1.146868  | up        | PREDICTED: uncharacterized protein LOC105158090 isoform X1 [Sesamum indicum]                |
| c39285.graph_c0 | 128.443647    | 127.704265    | 124.870853    | 14.7289225     | 14.9687884     | 18.6589722     | 1.39E-150 | -3.997271 | down      | hypothetical protein MIMGU_mgv11b009377mg [Erythranthe guttata]                             |
| c39287.graph_c0 | 6.82663674    | 6.19645395    | 6.46785905    | 35.9227322     | 40.6530576     | 47.5189299     | 4.731E-18 | 1.649867  | up        | -                                                                                           |
| c39293.graph_c0 | 11.0793087    | 10.564216     | 10.6520322    | 10.4304924     | 10.18164       | 10.7062842     | 1.121E-07 | -1.061417 | down      | hypothetical protein MIMGU_mgv1a0098172mg, partial [Erythranthe guttata]                    |
| c39296.graph_c0 | 1.54794011    | 1.0151832     | 0.96028623    | 0              | 0              | 0              | 2.277E-19 | -Inf      | down      | glycosyltransferase family 53 protein [Micromonas sp. PCC2601]                              |
| c39313.graph_c0 | 0             | 0             | 0             | 3.5641032      | 2.97482165     | 3.26741813     | 2.005E-11 | Inf       | up        | PREDICTED: malate dehydrogenase, cytoplasmic-like [Sesamum indicum]                         |
| c39314.graph_c1 | 8.04413931    | 10.3372765    | 7.40355388    | 80.8176237     | 82.3276119     | 75.5645083     | 1.516E-27 | 2.195385  | up        | PREDICTED: mitochondrial import inner membrane translocase subunit Tim9 [Elaeis guineensis] |
| c39316.graph_c0 | 21.5655409    | 23.4283912    | 23.3926727    | 10.6934343     | 9.47128276     | 8.16310224     | 2.107E-31 | -2.285885 | down      | PREDICTED: splicing factor 3B subunit 2 [Solanum lycopersicum]                              |
| c39319.graph_c0 | 0             | 0             | 0             | 1.08095846     | 1.17882513     | 1.27301074     | 1.068E-11 | Inf       | up        | PREDICTED: auxilin-like protein 1 [Sesamum indicum]                                         |
| c39321.graph_c0 | 0.87327499    | 0.34965978    | 0.33665788    | 3.05716794     | 4.2614457      | 3.65086137     | 0.0013132 | 1.799129  | up        | -                                                                                           |
| c39321.graph_c1 | 7.32547495    | 7.75790076    | 5.32068823    | 34.7215999     | 27.9069732     | 29.2125223     | 6.486E-07 | 1.160326  | up        | PREDICTED: uncharacterized protein LOC105156443 [Sesamum indicum]                           |
| c39327.graph_c0 | 0.95615242    | 0.90925437    | 1.16725903    | 11.8917446     | 11.2914166     | 11.6785128     | 4.07E-13  | 2.503852  | up        | unknown [Glycine max]                                                                       |
| c39328.graph_c0 | 11.1172394    | 9.09180693    | 9.99092767    | 46.9254261     | 47.7970792     | 46.8764167     | 1.665E-10 | 1.212012  | up        | PREDICTED: DNA-directed RNA polymerases II, IV and V subunit 9A [Sesamum indicum]           |
| c39334.graph_c0 | 0             | 0             | 0             | 1.71145586     | 1.49020271     | 2.02350389     | 2.39E-15  | Inf       | up        | hypothetical protein MIMGU_mgv1a002051mg [Erythranthe guttata]                              |
| c39339.graph_c0 | 1.88498907    | 1.95807949    | 2.23947158    | 7.86373532     | 10.1356534     | 9.73763695     | 4.207E-05 | 1.165442  | up        | PREDICTED: WD repeat domain-containing protein 83 [Sesamum indicum]                         |
| c39340.graph_c0 | 23.7726243    | 25.4663538    | 24.3235768    | 18.6497475     | 18.4734012     | 19.1191013     | 2.827E-20 | -1.404793 | down      | PREDICTED: protein BASIC PENTACYSTEINE1-like [Sesamum indicum]                              |
| c39349.graph_c0 | 0             | 0             | 0             | 2.90045299     | 1.82579432     | 1.08468643     | 1.008E-05 | Inf       | up        | PREDICTED: glucan endo-1,3-beta-glucosidase 14 isoform X1 [Sesamum indicum]                 |



| #ID             | 0 h-1<br>FPKM | 0 h-2<br>FPKM | 0 h-3<br>FPKM | 48 h-1<br>FPKM | 48 h-2<br>FPKM | 48 h-3<br>FPKM | FDR       | log2FC    | regulated | nr_annotation                                                                                                                            |
|-----------------|---------------|---------------|---------------|----------------|----------------|----------------|-----------|-----------|-----------|------------------------------------------------------------------------------------------------------------------------------------------|
| c39351.graph_c0 | 3.29674166    | 3.50956938    | 3.63123733    | 23.6224601     | 15.4236529     | 15.1423478     | 0.0012256 | 1.366877  | up        | PREDICTED: uncharacterized protein LOC105175733 [Sesamum indicum]                                                                        |
| c39353.graph_c0 | 11.1604376    | 10.550968     | 8.32167159    | 6.79101464     | 10.2871145     | 10.6169117     | 1.522E-05 | -1.139118 | down      | hypothetical protein AALP_AA4G241200 [Arabis alpina]                                                                                     |
| c39362.graph_c0 | 0.82811828    | 0.4736843     | 0.60809416    | 23.5414258     | 21.0136578     | 23.2744657     | 2.092E-50 | 4.135944  | up        | PREDICTED: U-box domain-containing protein 4 [Sesamum indicum]                                                                           |
| c39383.graph_c0 | 0.06582625    | 0.08785622    | 0.02819645    | 9.31887445     | 6.95980627     | 9.26316139     | 1.012E-36 | 6.12782   | up        | PREDICTED: probable auxin efflux carrier component 1c [Sesamum indicum]                                                                  |
| c39388.graph_c0 | 16.8600469    | 13.855047     | 16.3957615    | 15.5850498     | 13.7865208     | 11.7663497     | 1.397E-09 | -1.20974  | down      | -                                                                                                                                        |
| c39389.graph_c0 | 53.9672251    | 50.7178065    | 61.9374802    | 8.07344727     | 6.54995854     | 7.68383618     | 1.137E-61 | -3.917418 | down      | hypothetical protein MIMGU_mgv1a004314mg [Erythranthe guttata]                                                                           |
| c39394.graph_c0 | 6.55395423    | 4.50621371    | 5.27444062    | 19.3945634     | 25.1335447     | 26.8083018     | 7.413E-06 | 1.105163  | up        | hypothetical protein MIMGU_mgv1a006129mg [Erythranthe guttata]                                                                           |
| c39396.graph_c0 | 6.74864984    | 3.8413102     | 3.91102925    | 1.46289327     | 1.29146503     | 0.75930962     | 2.449E-07 | -3.052074 | down      | hypothetical protein AALP_AA2G024800 [Arabis alpina]                                                                                     |
| c39400.graph_c0 | 16.1498689    | 16.8577729    | 13.7477755    | 53.8543043     | 73.0636637     | 76.7043465     | 4.868E-08 | 1.101219  | up        | PREDICTED: uncharacterized protein At4g22758-like [Sesamum indicum]                                                                      |
| c39403.graph_c0 | 0.05587282    | 0.05592877    | 0.10769819    | 0.84931588     | 0.76342186     | 1.48853184     | 0.0001121 | 2.791597  | up        | PREDICTED: uncharacterized protein LOC105155966 isoform X1 [Sesamum indicum]                                                             |
| c39411.graph_c0 | 4.92007806    | 4.22908019    | 2.74891091    | 25.5703223     | 23.6438557     | 22.3577701     | 6.002E-11 | 1.578555  | up        | PREDICTED: protein DEHYDRATION-INDUCED 19-like [Nelumbo nucifera]                                                                        |
| c39416.graph_c1 | 18.7431915    | 14.07147      | 15.3272911    | 3.00872244     | 3.88028456     | 2.67714314     | 4.699E-20 | -3.349878 | down      | MYB-related transcription factor [Salvia miltiorrhiza]                                                                                   |
| c39426.graph_c0 | 0.03494053    | 0.27980412    | 0.17959984    | 9.91436364     | 13.6062447     | 14.7219966     | 7.925E-36 | 5.245971  | up        | PREDICTED: serine/threonine-protein kinase HT1-like [Sesamum indicum]                                                                    |
| c39438.graph_c0 | 9.51397561    | 6.44341056    | 9.77157843    | 5.01782086     | 6.52390294     | 7.88592791     | 2.428E-05 | -1.430571 | down      | PREDICTED: probable polyamine transporter At1g31830 isoform X1 [Sesamum indicum]                                                         |
| c39439.graph_c0 | 169.34639     | 172.639868    | 155.49463     | 658.932261     | 702.13903      | 777.069935     | 2.727E-13 | 1.085227  | up        | PREDICTED: 60S ribosomal protein L8-1 [Sesamum indicum]                                                                                  |
| c39444.graph_c0 | 5.22940674    | 5.48793238    | 6.71999469    | 23.3113092     | 24.5308688     | 25.3747015     | 7.262E-05 | 1.048716  | up        | PREDICTED: uncharacterized protein LOC104232221 [Nicotiana glauca]                                                                       |
| c39445.graph_c0 | 0.12673338    | 0.25372058    | 0             | 2.21834615     | 3.21588356     | 2.38942286     | 3.953E-07 | 3.354553  | up        | -                                                                                                                                        |
| c39446.graph_c0 | 2.88144344    | 1.71500629    | 1.90142187    | 0.50221663     | 0.07600538     | 0.12767695     | 1.674E-12 | -4.183928 | down      | PREDICTED: polyubiquitin [Sesamum indicum]                                                                                               |
| c39449.graph_c0 | 56.9708962    | 62.4224792    | 53.9887364    | 30.2955721     | 27.8545782     | 30.382768      | 4.884E-41 | -1.985212 | down      | -                                                                                                                                        |
| c39464.graph_c0 | 2.32825901    | 1.84360137    | 2.27742023    | 18.3120598     | 16.0418172     | 15.2114948     | 3.199E-16 | 1.927145  | up        | PREDICTED: ribulose-1,5 bisphosphate carboxylase/oxygenase large subunit N-methyltransferase, chloroplastic isoform X1 [Sesamum indicum] |
| c39481.graph_c0 | 10.0800191    | 5.35552135    | 6.37697162    | 0              | 0              | 0              | 5.432E-24 | -Inf      | down      | -                                                                                                                                        |
| c39483.graph_c0 | 0.25629874    | 0.15393323    | 0.19761242    | 1.79450532     | 1.45080955     | 0.92442844     | 0.0023898 | 1.769693  | up        | PREDICTED: protein DYAD-like [Sesamum indicum]                                                                                           |

| #ID             | 0 h-1<br>FPKM | 0 h-2<br>FPKM | 0 h-3<br>FPKM | 48 h-1<br>FPKM | 48 h-2<br>FPKM | 48 h-3<br>FPKM | FDR       | log2FC    | regulated | nr_annotation                                                                                             |
|-----------------|---------------|---------------|---------------|----------------|----------------|----------------|-----------|-----------|-----------|-----------------------------------------------------------------------------------------------------------|
| c39485.graph_c0 | 2.24854561    | 1.91317761    | 2.1671026     | 10.2021714     | 11.4114538     | 11.4740094     | 4.906E-05 | 1.3665    | up        | PREDICTED: monothiol glutaredoxin-S10-like isoform X1 [Sesamum indicum]                                   |
| c39498.graph_c0 | 29.2454485    | 28.4553388    | 31.8917302    | 27.6283825     | 28.215821      | 30.4702047     | 1.421E-12 | -1.073266 | down      | hypothetical protein M569_06909, partial [Genlisea aurea]                                                 |
| c39502.graph_c1 | 1.86295396    | 1.6735559     | 1.35044439    | 12.0359264     | 14.6853399     | 12.8435625     | 4.635E-19 | 1.999972  | up        | PREDICTED: guanylate-binding protein 4 isoform X1 [Sesamum indicum]                                       |
| c39522.graph_c0 | 62.5869409    | 58.4308949    | 58.7635145    | 14.9192344     | 14.2181303     | 12.1597236     | 9.1E-100  | -3.13697  | down      | hypothetical protein MIMGU_mgv1a011861mg [Erythranthe guttata]                                            |
| c39525.graph_c0 | 2.92912773    | 2.70058233    | 2.57539928    | 106.590889     | 174.495818     | 201.725019     | 9.78E-18  | 4.852939  | up        | PREDICTED: WAT1-related protein At2g37460-like [Sesamum indicum]                                          |
| c39536.graph_c0 | 96.1937466    | 99.5586813    | 85.9855126    | 51.9292216     | 57.1024652     | 60.5991575     | 2.659E-35 | -1.750298 | down      | PREDICTED: ubiquitin-activating enzyme E1 1-like isoform X1 [Sesamum indicum]                             |
| c39539.graph_c0 | 0.36494821    | 0.18265683    | 0.30148258    | 5.1873032      | 6.38576392     | 5.64132702     | 7.101E-17 | 3.321046  | up        | PREDICTED: probable inactive leucine-rich repeat receptor-like protein kinase At5g20690 [Sesamum indicum] |
| c39541.graph_c0 | 3.516826      | 2.57138431    | 2.98664182    | 22.3414269     | 22.7428007     | 22.1855631     | 4.177E-22 | 1.873147  | up        | PREDICTED: UPF0160 protein-like [Sesamum indicum]                                                         |
| c39546.graph_c0 | 0             | 0             | 0             | 1.15085263     | 1.25851748     | 1.05705471     | 2.163E-11 | Inf       | up        | PREDICTED: flavin-containing monooxygenase FMO GS-OX-like 9 [Sesamum indicum]                             |
| c39547.graph_c1 | 0             | 0             | 0             | 3.43443797     | 3.63837058     | 5.04230472     | 5.771E-11 | Inf       | up        | PREDICTED: homeobox-leucine zipper protein ATHB-14-like [Sesamum indicum]                                 |
| c39547.graph_c2 | 0.19264372    | 0.16528853    | 0.14145989    | 6.64267166     | 8.11147236     | 10.3774056     | 7.621E-24 | 4.632983  | up        | PREDICTED: homeobox-leucine zipper protein ATHB-14-like [Sesamum indicum]                                 |
| c39550.graph_c0 | 26.0202306    | 29.5692131    | 22.0555771    | 8.11344214     | 9.71844557     | 8.87371312     | 2.032E-32 | -2.557721 | down      | PREDICTED: uncharacterized protein LOC105155212 [Sesamum indicum]                                         |
| c39552.graph_c0 | 0.77605837    | 0.83982214    | 0.37734379    | 4.03853292     | 6.46868017     | 6.70550383     | 1.633E-07 | 2.091271  | up        | PREDICTED: anaphase-promoting complex subunit 2 [Sesamum indicum]                                         |
| c39554.graph_c0 | 1.60274       | 1.79089664    | 1.5566626     | 12.9112159     | 13.1140194     | 11.5799844     | 3.763E-21 | 1.909315  | up        | PREDICTED: cleavage and polyadenylation specificity factor subunit 6 [Nicotiana glauca]                   |
| c39579.graph_c0 | 2.31561616    | 2.14749851    | 2.01294542    | 18.8859497     | 19.940904      | 17.4187262     | 1.191E-20 | 2.102321  | up        | PREDICTED: parafibromin [Sesamum indicum]                                                                 |
| c39586.graph_c0 | 1.5916474     | 1.41621439    | 1.5150592     | 11.5134012     | 11.44912       | 10.9694058     | 1.705E-07 | 1.890446  | up        | PREDICTED: uncharacterized protein LOC105155506 isoform X4 [Sesamum indicum]                              |
| c39594.graph_c0 | 1.82864045    | 1.54446037    | 1.3952385     | 7.63362855     | 7.80804507     | 7.96345278     | 0.0011715 | 1.279552  | up        | unnamed protein product [Coffea canephora]                                                                |
| c39612.graph_c0 | 2.11962849    | 2.81456762    | 3.05733386    | 12.7924397     | 14.3964025     | 12.5882734     | 1.284E-06 | 1.293859  | up        | PREDICTED: MOB kinase activator-like 1 [Sesamum indicum]                                                  |
| c39629.graph_c0 | 0.09605628    | 0.30768788    | 0.22218501    | 0.70794646     | 1.46246769     | 1.41733463     | 0.0068142 | 1.486926  | up        | PREDICTED: FK506-binding protein 5 [Solanum lycopersicum]                                                 |
| c39645.graph_c0 | 0             | 0.07616685    | 0             | 1.6823922      | 3.49031896     | 3.86720468     | 2.578E-07 | 5.872615  | up        | PREDICTED: transcription factor MYB48 [Sesamum indicum]                                                   |
| c39649.graph_c0 | 4.9320028     | 9.35420486    | 7.00495769    | 2.63055312     | 2.53341097     | 2.34065035     | 1.632E-06 | -2.521242 | down      | -                                                                                                         |
| c39654.graph_c0 | 4.34557966    | 4.26070175    | 4.15238501    | 20.5920088     | 24.7291678     | 28.9545297     | 5.385E-14 | 1.519844  | up        | PREDICTED: glucan endo-1,3-beta-glucosidase 3 [Sesamum indicum]                                           |

| #ID             | 0 h-1<br>FPKM | 0 h-2<br>FPKM | 0 h-3<br>FPKM | 48 h-1<br>FPKM | 48 h-2<br>FPKM | 48 h-3<br>FPKM | FDR       | log2FC    | regulated | nr_annotation                                                                                      |
|-----------------|---------------|---------------|---------------|----------------|----------------|----------------|-----------|-----------|-----------|----------------------------------------------------------------------------------------------------|
| c39655.graph_c0 | 0.76196945    | 0.65377067    | 1.95832182    | 32.2908939     | 36.8642095     | 35.3353053     | 9.263E-29 | 3.921165  | up        | PREDICTED: UDP-arabinose 4-epimerase 1-like [Sesamum indicum]                                      |
| c39655.graph_c1 | 0.11906544    | 0.357554      | 0.45901141    | 22.2672422     | 32.3047546     | 27.8166434     | 4.462E-28 | 5.428193  | up        | PREDICTED: probable UDP-arabinose 4-epimerase 3 [Sesamum indicum]                                  |
| c39661.graph_c0 | 0.03196569    | 0.06399541    | 0.08215437    | 0.67732431     | 1.24790083     | 1.46739259     | 8.804E-06 | 3.21563   | up        | PREDICTED: uncharacterized protein LOC105171946 [Sesamum indicum]                                  |
| c39662.graph_c0 | 0.46078635    | 0.6259791     | 0.33835926    | 9.58171677     | 10.2470342     | 11.3316983     | 1.625E-23 | 3.435261  | up        | PREDICTED: folic acid synthesis protein fol1 isoform X2 [Sesamum indicum]                          |
| c39666.graph_c0 | 22.2231736    | 21.7295908    | 20.3628517    | 15.6666301     | 15.9053576     | 16.3690254     | 1.655E-14 | -1.440978 | down      | hypothetical protein AMTR_s00071p00136090 [Amborella trichopoda]                                   |
| c39675.graph_c0 | 49.7075032    | 52.2378459    | 50.2017518    | 23.098336      | 24.7544198     | 20.7917461     | 1.56E-47  | -2.165638 | down      | LIM domain and RING finger protein [Medicago truncatula]                                           |
| c39679.graph_c0 | 1.75060525    | 1.55765174    | 1.60685503    | 8.01265957     | 9.41050833     | 9.81745887     | 6.603E-08 | 1.450213  | up        | PREDICTED: fatty acid amide hydrolase [Sesamum indicum]                                            |
| c39682.graph_c0 | 25.042137     | 26.16026      | 23.8544624    | 9.38913661     | 11.8649346     | 8.83179143     | 1.082E-31 | -2.338064 | down      | PREDICTED: uncharacterized protein LOC105170284 [Sesamum indicum]                                  |
| c39687.graph_c1 | 3.2214262     | 3.54711717    | 2.75977347    | 28.8864692     | 27.1432989     | 25.1748626     | 2.615E-10 | 2.077656  | up        | RuBisCO large subunit-binding protein subunit beta, chloroplastic [Gossypium arboreum]             |
| c39688.graph_c1 | 65.0624152    | 69.5398775    | 66.6738114    | 47.4611072     | 49.6967295     | 51.7908345     | 2.015E-24 | -1.452979 | down      | PREDICTED: delta(3,5)-Delta(2,4)-dienoyl-CoA isomerase, mitochondrial [Sesamum indicum]            |
| c39689.graph_c0 | 0.45674427    | 0.3657613     | 0.23477379    | 3.53457394     | 3.59586312     | 3.46953117     | 5.579E-07 | 2.314054  | up        | PREDICTED: uncharacterized protein LOC105163339 [Sesamum indicum]                                  |
| c39695.graph_c0 | 28.1681222    | 25.4109025    | 25.5952134    | 238.589952     | 464.682418     | 847.302768     | 0.0021381 | 3.260571  | up        | hypothetical protein MIMGU_mgv1a004702mg [Erythranthe guttata]                                     |
| c39709.graph_c0 | 31.446007     | 35.061271     | 31.2079908    | 10.3346892     | 14.2095607     | 14.6251465     | 4.101E-42 | -2.341778 | down      | PREDICTED: uncharacterized protein LOC105156369 [Sesamum indicum]                                  |
| c39709.graph_c1 | 15.2156393    | 16.5279087    | 14.5099104    | 8.56065081     | 8.41860701     | 9.80223363     | 7.303E-24 | -1.805802 | down      | PREDICTED: F-box/kelch-repeat protein At5g15710-like [Sesamum indicum]                             |
| c39711.graph_c0 | 0.097301      | 0.06493229    | 0             | 0.71712019     | 1.99421745     | 2.04720295     | 0.0001908 | 3.858446  | up        | PREDICTED: LOW QUALITY PROTEIN: BID/POZ domain-containing protein At3g22104-like [Sesamum indicum] |
| c39713.graph_c0 | 27.0728429    | 27.4641989    | 25.5778927    | 20.1139264     | 22.0185416     | 21.5960159     | 7.818E-19 | -1.348464 | down      | PREDICTED: eukaryotic translation initiation factor 4G-like [Sesamum indicum]                      |
| c39715.graph_c0 | 19.5371557    | 20.5964435    | 19.5763385    | 4.6933846      | 6.75815596     | 7.78465938     | 1.2E-42   | -2.658886 | down      | PREDICTED: serine carboxypeptidase-like 50 [Sesamum indicum]                                       |
| c39715.graph_c1 | 26.3388863    | 24.9054392    | 21.9775168    | 16.8145743     | 17.3385643     | 17.0264125     | 2.24E-21  | -1.532848 | down      | PREDICTED: zinc finger CCHC domain-containing protein 10 [Sesamum indicum]                         |
| c39715.graph_c2 | 24.8501448    | 24.5241818    | 24.4567659    | 244.983848     | 268.86927      | 285.044249     | 1.872E-63 | 2.416206  | up        | PREDICTED: glutamate decarboxylase [Sesamum indicum]                                               |
| c39718.graph_c0 | 0.35238792    | 0.61729637    | 0.56604053    | 47.5195804     | 56.2738467     | 62.1782244     | 3.03E-103 | 5.732004  | up        | PREDICTED: GDSL esterase/lipase At1g71691 [Sesamum indicum]                                        |

| #ID             | 0 h-1<br>FPKM | 0 h-2<br>FPKM | 0 h-3<br>FPKM | 48 h-1<br>FPKM | 48 h-2<br>FPKM | 48 h-3<br>FPKM | FDR       | log2FC    | regulated | nr_annotation                                                                                        |
|-----------------|---------------|---------------|---------------|----------------|----------------|----------------|-----------|-----------|-----------|------------------------------------------------------------------------------------------------------|
| c39719.graph_c0 | 28.3655906    | 30.0774328    | 26.7018501    | 24.3074518     | 26.3708595     | 28.337787      | 5.478E-14 | -1.126413 | down      | PREDICTED: dynamin-related protein 3A-like [Sesamum indicum]                                         |
| c39721.graph_c0 | 76.9641607    | 73.1921743    | 69.1001439    | 10.0738499     | 15.5389337     | 17.9765529     | 8.39E-103 | -3.355636 | down      | PREDICTED: UDP-glucuronic acid decarboxylase 2-like [Sesamum indicum]                                |
| c39727.graph_c0 | 4.19624405    | 3.85483964    | 3.78828931    | 2.12866629     | 1.76257862     | 1.54573893     | 1.712E-13 | -2.134494 | down      | -                                                                                                    |
| c39733.graph_c0 | 0.759867      | 0.76062789    | 0.70305061    | 0.44802499     | 0.44496389     | 0.57305929     | 0.001092  | -1.619415 | down      | unnamed protein product [Coffea canephora]                                                           |
| c39733.graph_c1 | 16.846834     | 19.4661269    | 17.9738898    | 15.9994271     | 14.9195783     | 18.8821375     | 3.979E-10 | -1.142547 | down      | PREDICTED: uncharacterized protein LOC105173212 [Sesamum indicum]                                    |
| c39737.graph_c0 | 0.33116918    | 0.57259229    | 0.38687774    | 18.2502073     | 20.9793185     | 20.5331085     | 5.128E-63 | 4.513949  | up        | PREDICTED: LRR receptor-like serine/threonine-protein kinase FEI 1 [Sesamum indicum]                 |
| c39750.graph_c0 | 1.53840651    | 1.11770346    | 0.98845664    | 11.5439776     | 12.5684786     | 13.2821        | 8.089E-22 | 2.343164  | up        | PREDICTED: uncharacterized membrane protein At3g27390 [Sesamum indicum]                              |
| c39753.graph_c0 | 30.1535127    | 28.5156599    | 27.756132     | 17.8226671     | 17.2546214     | 16.756153      | 2.275E-35 | -1.753434 | down      | PREDICTED: RNA polymerase-associated protein RTF1 homolog [Sesamum indicum]                          |
| c39760.graph_c0 | 75.0796781    | 73.5094568    | 75.9283297    | 108.581947     | 67.2486279     | 40.787573      | 0.0006736 | -1.055408 | down      | PREDICTED: uncharacterized protein LOC105175444 [Sesamum indicum]                                    |
| c39762.graph_c0 | 2.35388898    | 2.7282849     | 2.8656384     | 10.7666906     | 16.1215593     | 13.1684563     | 6.735E-07 | 1.30836   | up        | PREDICTED: flavonol synthase/flavanone 3-hydroxylase-like [Sesamum indicum]                          |
| c39764.graph_c0 | 59.6739735    | 53.9118827    | 65.3191202    | 0.88078328     | 1.47738156     | 0.71840603     | 4.63E-134 | -6.886105 | down      | PREDICTED: putative cytochrome c oxidase subunit 6b-like isoform X2 [Sesamum indicum]                |
| c39766.graph_c0 | 0             | 0             | 0             | 4.14032844     | 5.24903023     | 4.8919211      | 1.274E-30 | Inf       | up        | PREDICTED: beta-amyrin synthase [Sesamum indicum]                                                    |
| c39771.graph_c0 | 0.07427792    | 0.0743523     | 0             | 0.78694117     | 1.08739402     | 1.76576089     | 0.0001001 | 3.604081  | up        | PREDICTED: pachytene checkpoint protein 2 homolog [Sesamum indicum]                                  |
| c39774.graph_c0 | 0             | 0             | 0             | 1.41476316     | 1.79852403     | 1.47465023     | 9.14E-12  | Inf       | up        | PREDICTED: uncharacterized protein LOC105171399 isoform X2 [Sesamum indicum]                         |
| c39775.graph_c0 | 1.27748844    | 1.0893206     | 1.45922065    | 9.02294354     | 9.53562591     | 10.5302139     | 3.616E-14 | 1.905177  | up        | PREDICTED: LOW QUALITY PROTEIN: ARF guanine-nucleotide exchange factor GNOM [Sesamum indicum]        |
| c39778.graph_c0 | 1.32659878    | 0.90687709    | 1.24736485    | 11.1483866     | 8.43146289     | 8.59359522     | 5.438E-10 | 2.004226  | up        | PREDICTED: uncharacterized protein LOC105176769 [Sesamum indicum]                                    |
| c39779.graph_c0 | 12.5355525    | 14.2915345    | 10.7783864    | 8.76171108     | 14.4485613     | 14.4275144     | 1.51E-06  | -1.022906 | down      | PREDICTED: pentatricopeptide repeat-containing protein At1g10270, partial [Sesamum indicum]          |
| c39798.graph_c1 | 44.6331686    | 44.1613549    | 43.8572172    | 41.1868953     | 43.9922289     | 40.5754863     | 1.526E-14 | -1.094962 | down      | PREDICTED: LOW QUALITY PROTEIN: mitogen-activated protein kinase homolog MMK1-like [Sesamum indicum] |
| c39800.graph_c0 | 5.72728228    | 6.36588284    | 4.97024407    | 4.04291447     | 4.57334902     | 4.38999984     | 1.044E-07 | -1.409268 | down      | PREDICTED: cyclin-dependent kinase inhibitor 3 isoform X2 [Sesamum indicum]                          |
| c39801.graph_c0 | 19.2034721    | 23.0502305    | 19.6544245    | 6.10591283     | 5.63918269     | 6.68677479     | 1.482E-29 | -2.764704 | down      | hypothetical protein VITISV_001313 [Vitis vinifera]                                                  |
| c39812.graph_c0 | 105.887973    | 109.314788    | 96.136581     | 31.1239788     | 30.5272579     | 32.5778285     | 1.484E-77 | -2.74064  | down      | hypothetical protein M569_12244, partial [Genlisea aurea]                                            |

| #ID             | 0 h-1<br>FPKM | 0 h-2<br>FPKM | 0 h-3<br>FPKM | 48 h-1<br>FPKM | 48 h-2<br>FPKM | 48 h-3<br>FPKM | FDR       | log2FC    | regulated | nr_annotation                                                                          |
|-----------------|---------------|---------------|---------------|----------------|----------------|----------------|-----------|-----------|-----------|----------------------------------------------------------------------------------------|
| c39816.graph_c0 | 2.0588769     | 2.35535834    | 2.59174367    | 16.1419142     | 27.5574803     | 30.0348128     | 1.127E-07 | 2.366434  | up        | PREDICTED: protein IQ-DOMAIN 1 isoform X1 [Sesamum indicum]                            |
| c39822.graph_c0 | 3.20402339    | 2.15168711    | 2.60588412    | 10.3871896     | 11.2414636     | 12.1681293     | 0.0001158 | 1.067156  | up        | PREDICTED: uric acid degradation bifunctional protein TTL isoform X1 [Sesamum indicum] |
| c39823.graph_c0 | 18.4329858    | 19.8707854    | 15.8110033    | 10.8295009     | 13.4813541     | 12.1481402     | 3.476E-19 | -1.588648 | down      | hypothetical protein MIMGU_mgv1a001998mg [Erythranthe guttata]                         |
| c39824.graph_c0 | 0.41940471    | 0.64881996    | 0.19598242    | 8.32479687     | 10.0470906     | 11.1266586     | 4.497E-20 | 3.5306    | up        | PREDICTED: apurinic endonuclease-redox protein [Sesamum indicum]                       |
| c39829.graph_c0 | 2.21625918    | 1.56598478    | 2.17786767    | 0.76065662     | 0.89064698     | 0.92618526     | 1.316E-06 | -2.231107 | down      | -                                                                                      |
| c39835.graph_c0 | 1.29639201    | 0.97326761    | 0.83295753    | 4.52846667     | 6.06259948     | 3.85228582     | 0.0091542 | 1.202502  | up        | PREDICTED: methionine aminopeptidase 2B [Sesamum indicum]                              |
| c39843.graph_c0 | 0             | 0             | 0.5181663     | 5.12644643     | 3.85668943     | 3.90039697     | 3.69E-09  | 3.591772  | up        | PREDICTED: uncharacterized protein LOC105177798 [Sesamum indicum]                      |
| c39865.graph_c0 | 0.7211291     | 0.56988253    | 0.56088493    | 14.5632768     | 15.6132363     | 13.2694402     | 1.617E-54 | 3.53647   | up        | PREDICTED: uncharacterized protein LOC105169651 [Sesamum indicum]                      |
| c39870.graph_c0 | 0             | 0             | 0             | 4.85576471     | 3.75914556     | 3.82209598     | 3.094E-10 | Inf       | up        | -                                                                                      |
| c39870.graph_c1 | 0             | 0.08076024    | 0             | 2.37846963     | 1.88977513     | 2.0502121      | 6.849E-10 | 5.28797   | up        | hypothetical protein PFL1_053074 [Pseudomonas fluorescens Pf-5]                        |
| c39874.graph_c0 | 0.59010848    | 0.72968747    | 0.75831276    | 4.06135855     | 5.72539654     | 4.63814885     | 1.099E-05 | 1.770965  | up        | PREDICTED: uncharacterized protein LOC105156620 [Sesamum indicum]                      |
| c39877.graph_c0 | 12.6592941    | 14.1862311    | 14.3749121    | 14.8165951     | 13.6372066     | 11.7804998     | 6.504E-09 | -1.050503 | down      | hypothetical protein MIMGU_mgv1a019094mg, partial [Erythranthe guttata]                |
| c39878.graph_c0 | 71.4927016    | 67.0544349    | 76.025879     | 2.07530855     | 2.71924408     | 2.33254367     | 3.11E-224 | -5.934359 | down      | PREDICTED: uncharacterized protein LOC105157942 isoform X1 [Sesamum indicum]           |
| c39879.graph_c0 | 2.91136735    | 2.2481609     | 2.24473338    | 12.5677487     | 14.4099758     | 13.807916      | 9.626E-08 | 1.443843  | up        | PREDICTED: 3-ketoacyl-CoA thiolase 2, peroxisomal [Sesamum indicum]                    |
| c39881.graph_c0 | 652.275533    | 554.684526    | 688.800879    | 30.9852551     | 35.8750137     | 33.9529544     | 9.032E-95 | -5.254046 | down      | -                                                                                      |
| c39883.graph_c0 | 0             | 0.1269072     | 0             | 6.89109566     | 6.68161244     | 7.69055094     | 4.535E-18 | 6.382194  | up        | PREDICTED: adenine phosphoribosyltransferase 5-like isoform X1 [Sesamum indicum]       |
| c39885.graph_c0 | 0.05817756    | 0.01941194    | 0.04984031    | 0.66102921     | 0.83276576     | 0.47690256     | 2.535E-06 | 2.931252  | up        | --                                                                                     |
| c39886.graph_c0 | 85.567761     | 80.6418064    | 81.518036     | 37.7904684     | 42.7552047     | 39.1289719     | 1.638E-46 | -2.068457 | down      | PREDICTED: membrane-anchored ubiquitin-fold protein 3 [Sesamum indicum]                |
| c39891.graph_c0 | 9.19445396    | 8.33230831    | 9.50812       | 6.36542839     | 4.1947131      | 5.03955078     | 2.645E-11 | -1.804647 | down      | -                                                                                      |
| c39893.graph_c0 | 0.208736      | 0.17412085    | 0.17882269    | 1.50635958     | 1.4599921      | 1.65404856     | 0.0002502 | 2.02342   | up        | PREDICTED: uncharacterized protein LOC105155471 [Sesamum indicum]                      |
| c39894.graph_c0 | 392.557405    | 381.642285    | 443.490563    | 1.7166906      | 1.43974521     | 1.05015692     | 1.48E-274 | -9.190192 | down      | PREDICTED: beta-amyrin 28-oxidase-like [Sesamum indicum]                               |
| c39900.graph_c0 | 18.3967698    | 19.5719245    | 16.9879527    | 14.989455      | 15.0524522     | 13.122813      | 6.819E-22 | -1.363809 | down      | PREDICTED: septin and tuftelin-interacting protein 1 homolog 1 [Sesamum indicum]       |

| #ID             | 0 h-1<br>FPKM | 0 h-2<br>FPKM | 0 h-3<br>FPKM | 48 h-1<br>FPKM | 48 h-2<br>FPKM | 48 h-3<br>FPKM | FDR       | log2FC    | regulated | nr_annotation                                                                             |
|-----------------|---------------|---------------|---------------|----------------|----------------|----------------|-----------|-----------|-----------|-------------------------------------------------------------------------------------------|
| c39908.graph_c0 | 5.05182786    | 6.08067333    | 5.45629715    | 0.54249934     | 1.72413682     | 0.6097423      | 2.697E-32 | -3.560346 | down      | -                                                                                         |
| c39913.graph_c0 | 0.4939992     | 1.29329165    | 0.1953257     | 25.7308961     | 38.4218774     | 36.3519653     | 9.317E-35 | 4.649082  | up        | PREDICTED: uncharacterized protein LOC105168623 [Sesamum indicum]                         |
| c39917.graph_c0 | 11.3335328    | 10.501396     | 12.9397962    | 6.94785483     | 6.00346268     | 9.60134261     | 3.393E-14 | -1.645225 | down      | PREDICTED: protein OPI10 homolog [Sesamum indicum]                                        |
| c39921.graph_c0 | 17.4650339    | 19.7850986    | 18.2283063    | 4.55227242     | 6.40239154     | 6.32030877     | 2.2E-46   | -2.706758 | down      | PREDICTED: autophagy-related protein 18a-like [Sesamum indicum]                           |
| c39926.graph_c0 | 1055.18742    | 1151.14368    | 1166.76017    | 69.102389      | 33.5930216     | 28.0523743     | 1.44E-228 | -5.690681 | down      | -                                                                                         |
| c39931.graph_c0 | 0             | 0             | 0.11764625    | 2.53027368     | 4.19947844     | 3.37713346     | 1.535E-10 | 5.367155  | up        | PREDICTED: uncharacterized protein LOC105157879 [Sesamum indicum]                         |
| c39933.graph_c0 | 2.17299753    | 1.60962836    | 1.61958496    | 9.48903945     | 7.54996891     | 9.47643546     | 0.0001125 | 1.282507  | up        | hypothetical protein L484_002978 [Morus notabilis]                                        |
| c39935.graph_c0 | 5.86637835    | 6.32396438    | 4.73574222    | 3.04868688     | 1.61485704     | 3.20592202     | 4.473E-08 | -2.11393  | down      | MYB5b [Vitis vinifera]                                                                    |
| c39936.graph_c0 | 4.58045339    | 5.42316561    | 5.94935496    | 31.4444087     | 32.6385778     | 36.2960493     | 1.991E-17 | 1.632408  | up        | PREDICTED: ABC transporter I family member 19-like [Nicotiana sylvestris]                 |
| c39937.graph_c0 | 0             | 0.089801      | 0.1152824     | 0.95044946     | 0.87555301     | 0.88247396     | 2.701E-06 | 2.694059  | up        | hypothetical protein MIMGU_mgv1a019040mg [Erythranthe guttata]                            |
| c39938.graph_c0 | 1.43519285    | 1.40539889    | 1.08251196    | 6.75468299     | 5.63326384     | 6.75196998     | 0.0001354 | 1.274015  | up        | PREDICTED: monooxygenase reductase NTRC [Sesamum indicum]                                 |
| c39942.graph_c0 | 0.84248656    | 1.05416273    | 0.99240953    | 3.84842811     | 5.17326373     | 4.92064455     | 0.0013745 | 1.24742   | up        | PREDICTED: uncharacterized protein LOC105158797 [Sesamum indicum]                         |
| c39944.graph_c1 | 1.46626252    | 1.01222811    | 1.23447939    | 9.96809544     | 11.6949405     | 10.6103045     | 2.919E-09 | 2.100573  | up        | KEUCURION-4-interacting 1, mitochondrial [Gossypium arboreum]                             |
| c39945.graph_c0 | 0.07594888    | 0.15204986    | 0.19519463    | 63.2520307     | 66.118372      | 75.4567558     | 1.95E-118 | 7.892454  | up        | PREDICTED: protodermal factor 1-like [Sesamum indicum]                                    |
| c39951.graph_c0 | 10.0060133    | 10.246817     | 9.48064385    | 37.0426889     | 41.7623809     | 48.1553911     | 1.54E-10  | 1.074139  | up        | PREDICTED: peptide chain release factor PrfB2, chloroplastic isoform X1 [Sesamum indicum] |
| c39953.graph_c0 | 0.30958405    | 0.2213529     | 0.28416269    | 9.24892118     | 9.88443747     | 8.77344289     | 2.61E-20  | 4.079446  | up        | hypothetical protein MIMGU_mgv1a010093mg [Erythranthe guttata]                            |
| c39981.graph_c0 | 4.54478588    | 3.90599624    | 4.01147097    | 108.480151     | 120.118798     | 126.893666     | 4.98E-119 | 3.815224  | up        | PREDICTED: 2-aminoethanethiol dioxygenase-like isoform X1 [Sesamum indicum]               |
| c39982.graph_c0 | 11.1973922    | 13.5376654    | 10.4647944    | 6.7878647      | 7.3801543      | 6.11927226     | 2.953E-16 | -1.811202 | down      | hypothetical protein MIMGU_mgv1a011446mg [Erythranthe guttata]                            |
| c39988.graph_c0 | 86.2966659    | 90.8810335    | 99.1667717    | 27.8463108     | 22.0635547     | 20.6364606     | 9.514E-74 | -2.983339 | down      | hypothetical protein JCGZ_17893 [Jatropha curcas]                                         |
| c39996.graph_c0 | 1.90481188    | 1.82381842    | 1.27709148    | 7.43898269     | 7.59780321     | 7.26410606     | 0.0012805 | 1.141901  | up        | PREDICTED: exosome complex component MTR3 [Sesamum indicum]                               |
| c39999.graph_c1 | 8.01069946    | 7.40970418    | 7.55766868    | 6.72605666     | 5.54201002     | 6.56666079     | 0.0003782 | -1.301543 | down      | -                                                                                         |
| c40001.graph_c0 | 2.34215324    | 1.8399862     | 2.43828629    | 24.1721991     | 25.636449      | 25.9557517     | 4.836E-38 | 2.496528  | up        | PREDICTED: protein IQ-DOMAIN 1-LIKE [Sesamum indicum]                                     |
| c40010.graph_c0 | 4.97607701    | 4.71889876    | 3.77684241    | 23.2967552     | 21.4992245     | 17.31816       | 1.145E-06 | 1.193511  | up        | PREDICTED: protein RRP45A-like isoform X1 [Sesamum indicum]                               |

| #ID             | 0 h-1<br>FPKM | 0 h-2<br>FPKM | 0 h-3<br>FPKM | 48 h-1<br>FPKM | 48 h-2<br>FPKM | 48 h-3<br>FPKM | FDR       | log2FC    | regulated | nr_annotation                                                                                        |
|-----------------|---------------|---------------|---------------|----------------|----------------|----------------|-----------|-----------|-----------|------------------------------------------------------------------------------------------------------|
| c40012.graph_c0 | 75.9246889    | 72.7705332    | 74.4852062    | 75.3316116     | 71.842064      | 60.2418059     | 2.736E-15 | -1.120774 | down      | PREDICTED: uncharacterized protein At3g28850-like [Sesamum indicum]                                  |
| c40013.graph_c0 | 2.67608149    | 2.47270263    | 2.99798981    | 0              | 0.06696851     | 0              | 1.033E-22 | -7.980961 | down      | PREDICTED: transcription repressor ORF1 [Sesamum indicum]                                            |
| c40024.graph_c0 | 16.1854622    | 15.7848169    | 16.3394915    | 3.93878205     | 2.68242556     | 3.70952498     | 1.962E-72 | -3.238231 | down      | PREDICTED: pneopnyunase, chloroplastic [Sesamum indicum]                                             |
| c40027.graph_c0 | 74.765173     | 72.4832512    | 77.1820432    | 9.73861303     | 10.7389338     | 12.328443      | 1.59E-131 | -3.795029 | down      | hypothetical protein MIMGU_mgv1a025482mg [Erythranthe guttata]                                       |
| c40032.graph_c0 | 92.7411866    | 103.667521    | 88.1293072    | 55.5797551     | 63.8441339     | 61.7081372     | 1.068E-31 | -1.670398 | down      | PREDICTED: ubiquitin-activating enzyme E1 1-like isoform X2 [Sesamum indicum]                        |
| c40037.graph_c0 | 61.9454695    | 58.230392     | 60.2068769    | 53.5919709     | 30.3818664     | 34.2822335     | 5.57E-11  | -1.615866 | down      | encoder and UV light related transcription factor [Oryza sativa]                                     |
| c40039.graph_c0 | 1.7391013     | 1.56380789    | 1.32573714    | 0.10862194     | 0.2013756      | 0.07248836     | 1.937E-18 | -4.61832  | down      | hypothetical protein [Vitis hybrid cultivar]                                                         |
| c40040.graph_c0 | 0.86367174    | 1.40487193    | 1.47980317    | 9.2496723      | 13.4866666     | 11.6817201     | 9.963E-14 | 2.171764  | up        | PREDICTED: G-type lectin 5-receptor-like serine/threonine-protein kinase At1g11330 [Sesamum indicum] |
| c40041.graph_c0 | 0             | 0             | 0             | 2.8271641      | 2.39603004     | 3.01871234     | 7.768E-12 | Inf       | up        | PREDICTED: transmembrane protein 184 homolog DDB_G0279555 isoform X1 [Sesamum indicum]               |
| c40045.graph_c0 | 7.77920686    | 8.26375145    | 8.10947765    | 6.06976693     | 5.73293341     | 4.75013824     | 5.895E-11 | -1.560154 | down      | unnamed protein product [Coffea canephora]                                                           |
| c40053.graph_c0 | 18.8819513    | 18.0194715    | 17.0979869    | 90.6717968     | 89.4674557     | 87.2554581     | 6.004E-14 | 1.291894  | up        | PREDICTED: serine/threonine-protein phosphatase PP2A-2 catalytic subunit [Sesamum indicum]           |
| c40054.graph_c0 | 32.9003982    | 33.5709682    | 29.754438     | 29.6057915     | 23.2508248     | 21.4608439     | 6.976E-22 | -1.383455 | down      | PREDICTED: receptor-like cytosolic serine/threonine-protein kinase RBK2 [Sesamum indicum]            |
| c40056.graph_c0 | 0.69253372    | 0.9358567     | 1.02342324    | 5.29546004     | 6.04922716     | 5.81887376     | 6.507E-06 | 1.671618  | up        | PREDICTED: uncharacterized protein LOC105176075 isoform X2 [Sesamum indicum]                         |
| c40061.graph_c0 | 1.74351121    | 0.96958726    | 1.12024047    | 10.8420947     | 12.0530888     | 13.9745893     | 1.489E-11 | 2.248207  | up        | PREDICTED: uncharacterized protein LOC105157824 isoform X1 [Sesamum indicum]                         |
| c40063.graph_c0 | 2.69619634    | 2.6624246     | 2.43466743    | 10.4727097     | 12.4813869     | 13.0818164     | 5.13E-06  | 1.189131  | up        | PREDICTED: zinc finger protein VAR3, chloroplastic [Sesamum indicum]                                 |
| c40069.graph_c1 | 2.79537423    | 2.22207886    | 2.85260285    | 10.1496372     | 14.6841247     | 14.4901755     | 0.0003516 | 1.295849  | up        | PREDICTED: villin-3-like [Sesamum indicum]                                                           |
| c40069.graph_c2 | 5.72526765    | 5.26632491    | 4.69269773    | 17.9902875     | 22.2903229     | 25.4955433     | 6.085E-08 | 1.047702  | up        | PREDICTED: villin-2-like [Sesamum indicum]                                                           |
| c40070.graph_c0 | 6.73457168    | 7.90512548    | 5.29963503    | 0.97005759     | 1.32739209     | 1.13288623     | 6.895E-26 | -3.558313 | down      | PREDICTED: protein TRML2 isoform AL [Sesamum indicum]                                                |
| c40072.graph_c0 | 0.90089815    | 0.75150022    | 0.72355612    | 6.53598333     | 8.02314241     | 11.0159416     | 8.97E-09  | 2.406339  | up        | PREDICTED: putative zinc finger protein At1g68190 isoform X1 [Sesamum indicum]                       |
| c40085.graph_c0 | 0.29534307    | 0.25340469    | 0.16265466    | 5.16969664     | 5.7237344      | 6.81348196     | 2.124E-13 | 3.622272  | up        | PREDICTED: uncharacterized protein LOC105172351 [Sesamum indicum]                                    |
| c40091.graph_c0 | 2.26961146    | 2.59643901    | 1.24994596    | 86.2502071     | 73.0973088     | 67.5753932     | 2.876E-36 | 4.206096  | up        | PREDICTED: universal stress protein A-like protein [Sesamum indicum]                                 |
| c40095.graph_c0 | 0.03654176    | 0.18289173    | 0.23478802    | 3.33280025     | 6.02715069     | 9.31588129     | 6.875E-06 | 4.321143  | up        | PREDICTED: alcohol-forming fatty acyl-CoA reductase-like isoform X1 [Sesamum indicum]                |

| #ID             | 0 h-1<br>FPKM | 0 h-2<br>FPKM | 0 h-3<br>FPKM | 48 h-1<br>FPKM | 48 h-2<br>FPKM | 48 h-3<br>FPKM | FDR       | log2FC    | regulated | nr_annotation                                                                                                                 |
|-----------------|---------------|---------------|---------------|----------------|----------------|----------------|-----------|-----------|-----------|-------------------------------------------------------------------------------------------------------------------------------|
| c40096.graph_c0 | 51.9092037    | 47.4031844    | 47.1640833    | 34.1609359     | 36.0049008     | 36.0444225     | 1.461E-25 | -1.481475 | down      | PREDICTED: uncharacterized protein LOC105168199 [Sesamum indicum]                                                             |
| c40099.graph_c0 | 0             | 0.09194924    | 0             | 4.69668208     | 6.3203125      | 6.7015869      | 4.916E-20 | 6.578643  | up        | PREDICTED: glucan 1,3-beta-glucosidase A-like [Sesamum indicum]                                                               |
| c40100.graph_c0 | 0.40807616    | 0.22280988    | 0.19068874    | 2.25567825     | 2.35341126     | 2.09832026     | 0.0001656 | 2.01798   | up        | PREDICTED: uncharacterized protein LOC105169180 [Sesamum indicum]                                                             |
| c40100.graph_c1 | 0.36630627    | 0.22917067    | 0.11767952    | 0.97021254     | 1.65345365     | 2.0268531      | 0.0042005 | 1.686452  | up        | -                                                                                                                             |
| c40102.graph_c0 | 1.28530288    | 1.85420312    | 1.06872447    | 9.5076654      | 9.44501088     | 8.14997839     | 2.828E-07 | 1.674247  | up        | PREDICTED: protein brevis radix-like 2 [Sesamum indicum]                                                                      |
| c40108.graph_c0 | 15.1528986    | 15.7391843    | 13.5420409    | 12.1201699     | 12.3812843     | 11.9261759     | 5.36E-19  | -1.302832 | down      | PREDICTED: serine/threonine-protein phosphatase 7 long form homolog [Sesamum indicum]                                         |
| c40109.graph_c0 | 0.43065006    | 0.64662194    | 0.33204143    | 2.89622335     | 5.33782297     | 6.8485777      | 0.0002602 | 2.394691  | up        | PREDICTED: uncharacterized protein LOC101260668 [Solanum lycopersicum]                                                        |
| c40115.graph_c0 | 31.1628105    | 34.853573     | 29.5746882    | 18.2943561     | 18.6170121     | 17.7047629     | 2.228E-38 | -1.823923 | down      | PREDICTED: LOW QUALITY PROTEIN: DEAD-box ATP-dependent RNA helicase 42 [Sesamum indicum]                                      |
| c40116.graph_c0 | 34.6005774    | 36.3686526    | 35.5191365    | 13.9286277     | 13.2931235     | 13.4309597     | 5.261E-57 | -2.405945 | down      | PREDICTED: LOW QUALITY PROTEIN: uncharacterized protein LOC105178147 [Sesamum indicum]                                        |
| c40121.graph_c0 | 2.04138988    | 2.64889595    | 2.67184583    | 11.5974126     | 12.5443178     | 12.9223767     | 5.134E-07 | 1.310841  | up        | hypothetical protein MIMGU_mgv1a007621mg [Erythranthe guttata]                                                                |
| c40126.graph_c0 | 19.5486758    | 20.5900916    | 19.5129103    | 7.26493499     | 6.62530909     | 5.62749346     | 3.206E-60 | -2.625873 | down      | PREDICTED: cryptochrome-1 isoform A1 [Sesamum indicum]                                                                        |
| c40127.graph_c0 | 312.704077    | 328.723827    | 320.467489    | 218.714143     | 220.827382     | 198.644303     | 2.331E-26 | -1.608772 | down      | PREDICTED: protein YLS9-like [Sesamum indicum]                                                                                |
| c40129.graph_c0 | 0.02007546    | 0.04019112    | 0             | 0.99872028     | 1.21476719     | 1.38235268     | 3.235E-11 | 4.891713  | up        | PREDICTED: probable linoleate 9S-lipoxygenase 5 isoform X1 [Sesamum indicum]                                                  |
| c40130.graph_c0 | 0             | 0.03273848    | 0             | 114.345836     | 91.3543977     | 83.2184751     | 2.683E-64 | 12.10695  | up        | PREDICTED: bifunctional 3-dehydroquinone dehydratase/shikimate dehydrogenase, chloroplastic-like isoform X1 [Sesamum indicum] |
| c40136.graph_c1 | 1.12724178    | 1.60347392    | 1.44855031    | 0              | 0              | 0              | 1.892E-19 | -Inf      | down      | -                                                                                                                             |
| c40137.graph_c0 | 61.2310522    | 67.0468893    | 57.6674793    | 34.9380955     | 41.4924708     | 39.4897904     | 7.712E-33 | -1.701058 | down      | PREDICTED: CBL-interacting serine/threonine-protein kinase 7-like isoform X1 [Sesamum indicum]                                |
| c40141.graph_c0 | 14.8600693    | 12.4502782    | 12.8004661    | 13.5897716     | 11.5811214     | 12.7390911     | 1.702E-11 | -1.095471 | down      | PREDICTED: activating signal cointegrator 1 complex subunit 2 [Sesamum indicum]                                               |
| c40144.graph_c0 | 10.7704373    | 10.9415379    | 9.98158009    | 9.47979311     | 11.1759133     | 9.74791316     | 5.907E-08 | -1.078636 | down      | PREDICTED: coenzyme Q-binding protein COQ10 homolog, mitochondrial-like [Sesamum indicum]                                     |
| c40148.graph_c0 | 3.6894133     | 3.13750742    | 4.61517378    | 53.9015866     | 55.6682672     | 55.5890826     | 5.902E-67 | 2.830195  | up        | PREDICTED: signal peptide peptidase-like 2 [Sesamum indicum]                                                                  |
| c40150.graph_c0 | 16.3633943    | 17.2885654    | 16.1665373    | 15.0949403     | 16.6663516     | 15.0615819     | 1.204E-13 | -1.107692 | down      | PREDICTED: translocase of chloroplast 90, chloroplastic [Sesamum indicum]                                                     |
| c40152.graph_c0 | 43.6727573    | 45.0671868    | 44.0680585    | 34.806973      | 38.3512876     | 46.0249008     | 2.137E-16 | -1.176785 | down      | PREDICTED: peptide methionine sulfoxide reductase A1-like [Nicotiana tomentosiformis]                                         |



| #ID             | 0 h-1<br>FPKM | 0 h-2<br>FPKM | 0 h-3<br>FPKM | 48 h-1<br>FPKM | 48 h-2<br>FPKM | 48 h-3<br>FPKM | FDR       | log2FC    | regulated | nr_annotation                                                                           |
|-----------------|---------------|---------------|---------------|----------------|----------------|----------------|-----------|-----------|-----------|-----------------------------------------------------------------------------------------|
| c40153.graph_c0 | 0.13820625    | 0.27668928    | 0.88800251    | 24.4463254     | 21.176943      | 16.314145      | 2.959E-17 | 4.540964  | up        | Lysine decarboxylase family protein isoform 5 [Theobroma cacao]                         |
| c40153.graph_c1 | 8.05177203    | 8.54830949    | 7.33685432    | 61.1857559     | 57.1987406     | 63.2431569     | 1.461E-30 | 1.907984  | up        | PREDICTED: 50S ribosomal protein L15, chloroplastic [Sesamum indicum]                   |
| c40154.graph_c0 | 8.15228533    | 6.81220058    | 6.14896205    | 31.9682532     | 34.385382      | 35.8833216     | 1.464E-13 | 1.258925  | up        | PREDICTED: serine/threonine-protein kinase At5g01020 [Sesamum indicum]                  |
| c40158.graph_c0 | 4.88525344    | 5.8344492     | 4.45936304    | 4.25230437     | 4.11021976     | 3.25893163     | 1.312E-07 | -1.398641 | down      | PREDICTED: uncharacterized protein LOC105158947 [Sesamum indicum]                       |
| c40159.graph_c0 | 51.0736622    | 52.3218119    | 48.485756     | 31.8611062     | 33.1080173     | 31.9354668     | 5.808E-32 | -1.665533 | down      | PREDICTED: pentatricopeptide repeat-containing protein At5g01110 [Sesamum indicum]      |
| c40161.graph_c0 | 73.0220927    | 73.9855503    | 65.692891     | 28.4109009     | 30.0836738     | 30.9812614     | 2.473E-53 | -2.266806 | down      | PREDICTED: DNA-directed RNA polymerase II subunit RPB2 [Sesamum indicum]                |
| c40166.graph_c0 | 0             | 0             | 0             | 1.00474873     | 0.72227784     | 0.76630233     | 1.128E-10 | Inf       | up        | --                                                                                      |
| c40167.graph_c0 | 5.18621546    | 4.80968744    | 5.09637638    | 18.8655995     | 20.7673833     | 21.8193201     | 4.727E-07 | 1.005946  | up        | PREDICTED: probable methyltransferase PMT23 [Sesamum indicum]                           |
| c40169.graph_c0 | 4.83471616    | 5.54838146    | 5.19302363    | 3.58798945     | 3.40782875     | 4.60370803     | 2.119E-16 | -1.444402 | down      | PREDICTED: uncharacterized protein LOC105170357 [Sesamum indicum]                       |
| c40171.graph_c0 | 0.033963      | 0.0169985     | 0.0218219     | 9.32410081     | 9.26453792     | 8.90902425     | 3.337E-72 | 7.547256  | up        | PREDICTED: 125 kDa kinesin-related protein-like [Sesamum indicum]                       |
| c40175.graph_c0 | 379.855921    | 371.686769    | 378.37508     | 241.522835     | 269.144793     | 271.984295     | 2.141E-25 | -1.549371 | down      | hypothetical protein EUTSA_v10026962mg [Eutrema salsugineum]                            |
| c40179.graph_c0 | 0             | 0             | 0             | 1.94867105     | 2.94284055     | 1.99215856     | 2.832E-13 | Inf       | up        | PREDICTED: RING-H2 finger protein ATL46-like [Sesamum indicum]                          |
| c40181.graph_c0 | 4.19194185    | 4.52250585    | 5.98534583    | 83.4168295     | 88.6882208     | 87.6634925     | 1.381E-80 | 3.121121  | up        | PREDICTED: histone deacetylase HD11 [Sesamum indicum]                                   |
| c40182.graph_c0 | 10.017294     | 9.83705296    | 7.98737481    | 6.514295       | 6.56718119     | 6.21708556     | 1.15E-20  | -1.543588 | down      | PREDICTED: WPP domain-associated protein [Sesamum indicum]                              |
| c40184.graph_c0 | 54.8806914    | 54.255137     | 58.6110469    | 1.36647764     | 2.11110865     | 3.24235622     | 9.42E-189 | -5.670287 | down      | PREDICTED: ADP-ribosylation factor-like protein 8B isoform X1 [Nelumbo nucifera]        |
| c40189.graph_c0 | 0.16815834    | 0.07214003    | 0             | 0.79672337     | 1.14882106     | 1.5359926      | 2.17E-05  | 2.849325  | up        | PREDICTED: uncharacterized protein LOC105177814 [Sesamum indicum]                       |
| c40190.graph_c0 | 50.8635568    | 53.8755901    | 42.9760993    | 13.626153      | 17.2421123     | 19.6012249     | 6.449E-52 | -2.570027 | down      | PREDICTED: SNF1-related protein kinase regulatory subunit beta-3-like [Sesamum indicum] |
| c40192.graph_c0 | 0.3642044     | 0.18228455    | 0.07800284    | 7.94084935     | 9.53796541     | 9.65316676     | 6.999E-17 | 4.43191   | up        | PREDICTED: endo-1,3;1,4-beta-D-glucanase-like [Sesamum indicum]                         |
| c40195.graph_c0 | 1.9488645     | 1.43744336    | 2.10894151    | 15.2138313     | 20.2215921     | 19.9273952     | 2.03E-09  | 2.308058  | up        | PREDICTED: growth-regulating factor 6-like [Sesamum indicum]                            |
| c40198.graph_c0 | 40.2043098    | 38.1351979    | 37.0556518    | 11.5458982     | 16.3447198     | 11.9554106     | 5.965E-55 | -2.555255 | down      | hypothetical protein MIMGU_mgv1a012947mg [Erythranthe guttata]                          |

| #ID             | 0 h-1<br>FPKM | 0 h-2<br>FPKM | 0 h-3<br>FPKM | 48 h-1<br>FPKM | 48 h-2<br>FPKM | 48 h-3<br>FPKM | FDR       | log2FC    | regulated | nr_annotation                                                                                                       |
|-----------------|---------------|---------------|---------------|----------------|----------------|----------------|-----------|-----------|-----------|---------------------------------------------------------------------------------------------------------------------|
| c40199.graph_c0 | 2.57280587    | 2.41834665    | 1.93531165    | 15.9846442     | 15.402708      | 17.0522165     | 2.407E-15 | 1.791249  | up        | hypothetical protein MIMGU_mgv1a006303mg [Erythranthe guttata]                                                      |
| c40200.graph_c0 | 0.88965153    | 1.00186018    | 0.85742808    | 12.1916247     | 14.6520923     | 10.9695809     | 2.175E-19 | 2.763872  | up        | PREDICTED: patatin-like protein 2 [Sesamum indicum]                                                                 |
| c40204.graph_c0 | 0.59211879    | 0.37434424    | 0.28033014    | 2.8136236      | 3.9843958      | 4.16406014     | 2.773E-06 | 2.11838   | up        | PREDICTED: transcription factor EGL1-like [Sesamum indicum]                                                         |
| c40207.graph_c0 | 0.44743164    | 0.20154585    | 0.31623205    | 3.42128664     | 2.62007591     | 3.90616374     | 1.881E-08 | 2.351179  | up        | PREDICTED: kinesin-4 [Sesamum indicum]                                                                              |
| c40208.graph_c0 | 0.58059499    | 0.30221171    | 0.17906101    | 5.58416781     | 7.36635372     | 9.46158312     | 5.553E-13 | 3.384746  | up        | PREDICTED: cellulose synthase-like protein D5 [Sesamum indicum]                                                     |
| c40209.graph_c0 | 0             | 0             | 0.04902479    | 3.79583779     | 6.73928339     | 7.31794622     | 2.593E-16 | 7.448211  | up        | PREDICTED: leucine-rich repeat receptor-like tyrosine-protein kinase At2g41820 [Sesamum indicum]                    |
| c40211.graph_c1 | 0.93400196    | 1.32180779    | 0.53803391    | 8.39693716     | 8.54977382     | 8.23717946     | 7.532E-11 | 2.160979  | up        | PREDICTED: histone deacetylase 15 isoform X8 [Sesamum indicum]                                                      |
| c40212.graph_c0 | 5.23069748    | 5.28227094    | 4.40179069    | 32.4953193     | 30.946224      | 27.5101723     | 1.163E-15 | 1.59468   | up        | PREDICTED: protein TIFY 7 [Sesamum indicum]                                                                         |
| c40215.graph_c1 | 0.02279387    | 0             | 0.05858205    | 19.3822618     | 46.2719013     | 59.4929194     | 9.006E-14 | 9.536697  | up        | PREDICTED: subtilisin-like protease [Sesamum indicum]                                                               |
| c40216.graph_c0 | 7.74045047    | 8.61715852    | 9.8538247     | 75.1088397     | 86.4171241     | 82.9610648     | 2.277E-37 | 2.199458  | up        | PREDICTED: ubiquitin-conjugating enzyme E2 36-like [Brassica rapa]                                                  |
| c40220.graph_c0 | 205.697226    | 220.488227    | 195.631504    | 125.824926     | 184.357724     | 215.968083     | 4.723E-18 | -1.265516 | down      | PREDICTED: uncharacterized protein At5g48480 [Sesamum indicum]                                                      |
| c40223.graph_c1 | 0.33240682    | 0.76054783    | 0.42715592    | 4.37478349     | 2.50265842     | 2.60807955     | 0.0080183 | 1.63656   | up        | PREDICTED: cyclin-D4-1-like [Sesamum indicum]                                                                       |
| c40227.graph_c0 | 3.90026395    | 3.96817225    | 2.95789786    | 27.8029476     | 20.9047464     | 17.6631521     | 6.87E-05  | 1.608691  | up        | PREDICTED: potassium/sodium hyperpolarization-activated cyclic nucleotide-gated channel 4 [Sesamum indicum]         |
| c40228.graph_c0 | 0.22705082    | 0.51137589    | 0.58353858    | 6.95503623     | 6.03845047     | 5.49059271     | 7.02E-09  | 2.78536   | up        | PREDICTED: membrane protein of ER body-like protein [Sesamum indicum]                                               |
| c40229.graph_c0 | 1.05363569    | 1.05469074    | 0.69881991    | 3.94533605     | 4.80986307     | 5.32152724     | 0.001014  | 1.30845   | up        | PREDICTED: transcription factor ELFA-like [Sesamum indicum]                                                         |
| c40236.graph_c0 | 2.29268373    | 2.24201844    | 1.69972463    | 1.20231204     | 1.41140152     | 1.04089623     | 6.375E-09 | -1.785896 | down      | PREDICTED: uveal autoantigen with coiled-coil domains and ankyrin repeats [Sesamum indicum]                         |
| c40238.graph_c0 | 6.12908535    | 5.60428997    | 6.28574749    | 4.04485801     | 4.11248479     | 3.86479499     | 2.969E-11 | -1.601721 | down      | PREDICTED: glucose-1-phosphate acetyltransferase large subunit 2, chloroplastic/amyloplastic-like [Sesamum indicum] |
| c40242.graph_c0 | 49.9966987    | 46.8033141    | 44.3689949    | 42.6578622     | 46.5849815     | 46.0107288     | 1.559E-14 | -1.079718 | down      | hypothetical protein MIMGU_mgv1a007434mg [Erythranthe guttata]                                                      |
| c40244.graph_c0 | 0.21722552    | 0.54360759    | 0.1860956     | 3.36872567     | 3.03874305     | 3.2645733      | 3.233E-06 | 2.341622  | up        | PREDICTED: sulfhydryl oxidase 2-like [Sesamum indicum]                                                              |
| c40250.graph_c0 | 1.19326248    | 0.75648966    | 1.58450252    | 8.79448983     | 9.31669559     | 7.85788951     | 2.458E-08 | 1.854979  | up        | PREDICTED: Werner Syndrome-like exonuclease isoform X2 [Sesamum indicum]                                            |
| c40251.graph_c0 | 1.16045182    | 0.68181682    | 0.97253904    | 10.179538      | 11.5472364     | 11.4772121     | 7.157E-22 | 2.540693  | up        | PREDICTED: APO protein 2, chloroplastic [Sesamum indicum]                                                           |
| c40255.graph_c0 | 43.0542947    | 46.2197702    | 43.8659895    | 19.6703166     | 21.9102451     | 20.2395505     | 1.968E-45 | -2.125614 | down      | PREDICTED: DEAD-box ATP-dependent RNA helicase 37-like [Sesamum indicum]                                            |
| c40260.graph_c0 | 0.21187402    | 0.26510773    | 0.38571088    | 14.2978264     | 14.7677122     | 14.5312951     | 3.651E-79 | 4.63544   | up        | PREDICTED: proteoglycan 4-like [Sesamum indicum]                                                                    |

| #ID             | 0 h-1<br>FPKM | 0 h-2<br>FPKM | 0 h-3<br>FPKM | 48 h-1<br>FPKM | 48 h-2<br>FPKM | 48 h-3<br>FPKM | FDR       | log2FC    | regulated | nr_annotation                                                                                                  |
|-----------------|---------------|---------------|---------------|----------------|----------------|----------------|-----------|-----------|-----------|----------------------------------------------------------------------------------------------------------------|
| c40264.graph_c0 | 1.16674978    | 1.0900569     | 1.59927431    | 6.80761135     | 7.81915149     | 7.90646403     | 0.0004798 | 1.522822  | up        | PREDICTED: very-long-chain enoyl-CoA reductase-like [Sesamum indicum]                                          |
| c40265.graph_c0 | 2.71320613    | 2.74987204    | 2.87642627    | 10.3107776     | 15.2591261     | 13.6504963     | 4.634E-07 | 1.209163  | up        | PREDICTED: putative GPI-anchor transamidase [Sesamum indicum]                                                  |
| c40269.graph_c0 | 37.3000991    | 33.4931819    | 31.6462927    | 25.6066172     | 31.6717161     | 31.835497      | 8.338E-16 | -1.221098 | down      | PREDICTED: COP9 signalosome complex subunit 5b-like [Sesamum indicum]                                          |
| c40273.graph_c0 | 121.146377    | 122.925756    | 121.547661    | 100.820755     | 104.967781     | 89.335131      | 3.624E-21 | -1.326002 | down      | hypothetical protein 29 [Hevea brasiliensis]                                                                   |
| c40274.graph_c0 | 4.19741006    | 4.15643449    | 5.16184507    | 1.16423636     | 2.29053919     | 1.70188585     | 2.648E-11 | -2.420005 | down      | -                                                                                                              |
| c40281.graph_c1 | 0.32566811    | 0.08149855    | 0.15693616    | 3.60032047     | 3.09895867     | 2.83647081     | 3.055E-08 | 3.070376  | up        | hypothetical protein MIMGU_mgv1a006975mg [Erythranthe guttata]                                                 |
| c40283.graph_c0 | 0.96493648    | 1.13243768    | 1.15446561    | 14.9590919     | 17.6983657     | 18.3019513     | 1.312E-30 | 2.947887  | up        | unnamed protein product [Coffea canephora]                                                                     |
| c40284.graph_c0 | 3.3152135     | 3.97218367    | 3.09831317    | 13.7901347     | 16.6189354     | 15.6879677     | 2.873E-05 | 1.130977  | up        | hyponeucal protein CICLE_v10022955mg [Citrus clamentinal]                                                      |
| c40289.graph_c0 | 4.1767579     | 3.66213748    | 4.03526879    | 16.2482569     | 17.6296229     | 17.2066698     | 9.29E-12  | 1.086151  | up        | PREDICTED: RNA polymerase-associated protein CTR9 homolog [Sesamum indicum]                                    |
| c40295.graph_c0 | 5.10845251    | 5.73971902    | 6.49757838    | 78.1331828     | 92.2352696     | 96.784461      | 3.329E-70 | 2.921923  | up        | hypothetical protein MIMGU_mgv1a011840mg [Erythranthe guttata]                                                 |
| c40300.graph_c0 | 4.67852065    | 4.52263843    | 3.53854102    | 41.7469626     | 46.1566486     | 46.0656664     | 3.465E-49 | 2.377979  | up        | PREDICTED: protein INVOLVED IN DE NOVO 2 [Sesamum indicum]                                                     |
| c40302.graph_c0 | 10.5792869    | 10.4204424    | 11.7459094    | 1.8712952      | 2.02371057     | 1.90788952     | 2.433E-43 | -3.516161 | down      | hypothetical protein MIMGU_mgv1a018285mg [Erythranthe guttata]                                                 |
| c40303.graph_c0 | 51.5860484    | 51.1423423    | 42.0865146    | 53.3268341     | 25.8025165     | 18.3653226     | 4.022E-07 | -1.568015 | down      | PREDICTED: leucine-rich repeat receptor-like serine/threonine/tyrosine-protein kinase SOBIR1 [Sesamum indicum] |
| c40304.graph_c0 | 66.2415585    | 60.8887404    | 65.8932286    | 12.7039568     | 13.4084562     | 13.0204232     | 5.5E-102  | -3.32082  | down      | PREDICTED: probable serine/threonine-protein kinase Cx32, chloroplastic [Sesamum indicum]                      |
| c40310.graph_c0 | 77.7729053    | 81.0945657    | 76.5792865    | 83.7934516     | 74.9926528     | 76.7200371     | 5.188E-13 | -1.014716 | down      | hypothetical protein MIMGU_mgv1a008821mg [Erythranthe guttata]                                                 |
| c40312.graph_c0 | 2.45464406    | 2.11819139    | 2.0122353     | 16.3365081     | 14.2913272     | 12.1423493     | 7.93E-10  | 1.687478  | up        | hypothetical protein MIMGU_mgv1a010279mg [Erythranthe guttata]                                                 |
| c40316.graph_c0 | 63.1802962    | 64.4881269    | 57.2234473    | 43.6769645     | 48.122543      | 48.8408793     | 5.994E-24 | -1.412905 | down      | PREDICTED: glucose-6-phosphate/phosphate translocator 2, chloroplastic-like [Solanum tuberosum]                |
| c40319.graph_c0 | 0             | 0             | 0             | 0.87317073     | 0.74598267     | 0.82706736     | 1.965E-11 | Inf       | up        | PREDICTED: monofunctional riboflavin biosynthesis protein RIBA 3, chloroplastic [Sesamum indicum]              |
| c40320.graph_c0 | 5.78919409    | 4.83416355    | 4.58695279    | 35.1782218     | 26.4645896     | 22.2281529     | 0.0001711 | 1.454776  | up        | PREDICTED: sugar transport protein 14-like [Sesamum indicum]                                                   |
| c40322.graph_c0 | 305.692846    | 299.893572    | 311.850951    | 1577.63904     | 1642.49197     | 1783.29615     | 8.639E-16 | 1.428117  | up        | RecName: Full=Catalase [Avicennia marina]                                                                      |
| c40323.graph_c0 | 14.7054921    | 13.3299746    | 13.7529182    | 7.827536       | 7.97338967     | 8.17035696     | 8.445E-12 | -1.81939  | down      | PREDICTED: RPA-interacting protein B [Sesamum indicum]                                                         |

| #ID             | 0 h-1<br>FPKM | 0 h-2<br>FPKM | 0 h-3<br>FPKM | 48 h-1<br>FPKM | 48 h-2<br>FPKM | 48 h-3<br>FPKM | FDR       | log2FC    | regulated | nr_annotation                                                                                         |
|-----------------|---------------|---------------|---------------|----------------|----------------|----------------|-----------|-----------|-----------|-------------------------------------------------------------------------------------------------------|
| c40323.graph_c1 | 19.3780981    | 16.6860235    | 19.5464355    | 12.2855005     | 7.32093643     | 10.7607588     | 2.018E-07 | -1.884059 | down      | PREDICTED: RPA-interacting protein B [Sesamum indicum]                                                |
| c40324.graph_c0 | 28.2732633    | 26.7412673    | 29.7684188    | 15.6857453     | 18.7235438     | 20.2672555     | 1.913E-29 | -1.654951 | down      | PREDICTED: uncharacterized protein LOC105177636 [Sesamum indicum]                                     |
| c40325.graph_c0 | 45.9245234    | 45.4296803    | 43.9486916    | 48.2318797     | 40.5497336     | 38.4874957     | 6.627E-14 | -1.101402 | down      | PREDICTED: uncharacterized protein LOC105172600 [Sesamum indicum]                                     |
| c40326.graph_c1 | 1.70774865    | 1.157446      | 1.32585863    | 8.24338117     | 7.29185362     | 6.31414803     | 4.508E-08 | 1.369826  | up        | PREDICTED: autophagy-related protein 18g-like [Sesamum indicum]                                       |
| c40329.graph_c0 | 222.876342    | 228.095854    | 236.780308    | 56.487043      | 64.080136      | 67.0301313     | 1.941E-69 | -2.894963 | down      | PREDICTED: transmembrane 9 superfamily member 8 [Sesamum indicum]                                     |
| c40330.graph_c0 | 16.5960412    | 17.0397781    | 14.2273329    | 15.0410846     | 16.0218764     | 15.2059745     | 8.308E-13 | -1.065377 | down      | PREDICTED: uncharacterized protein LOC105164225 [Sesamum indicum]                                     |
| c40336.graph_c0 | 25.1821953    | 26.2332945    | 24.8031524    | 11.4648597     | 16.8371754     | 19.5626142     | 2.689E-30 | -1.696154 | down      | YSL transporter [Medicago truncatula]                                                                 |
| c40338.graph_c0 | 38.2156083    | 37.0261328    | 39.8177592    | 36.6934809     | 36.6672203     | 31.3796365     | 2.942E-13 | -1.152364 | down      | PREDICTED: vesicle transport V-SNAKE 12 [Sesamum indicum]                                             |
| c40343.graph_c0 | 1.77867698    | 2.07030007    | 2.28567034    | 30.4099845     | 34.0727361     | 34.3488514     | 2.25E-46  | 2.988127  | up        | hypothetical protein MIMGU_mgv1a009694mg [Erythranthe guttata]                                        |
| c40344.graph_c0 | 2.74609602    | 2.22879391    | 1.52598578    | 8.82040208     | 10.5755456     | 10.3427746     | 0.0034968 | 1.178204  | up        | unnamed protein product [Coffea canephora]                                                            |
| c40349.graph_c0 | 2.3494512     | 1.6518622     | 2.65971664    | 10.8481059     | 10.0181871     | 10.1569897     | 5.545E-07 | 1.200828  | up        | hypothetical protein MIMGU_mgv1a009342mg [Erythranthe guttata]                                        |
| c40351.graph_c0 | 13.0413442    | 9.573229      | 12.1881045    | 0.50970763     | 0.77139061     | 1.03665093     | 2.743E-39 | -4.935439 | down      | PREDICTED: calcium-dependent protein kinase 11 [Sesamum indicum]                                      |
| c40354.graph_c0 | 4.79289792    | 5.48308261    | 5.5724861     | 0.94618504     | 0.55687129     | 1.12254634     | 1.071E-12 | -3.608531 | down      | PREDICTED: UDP-glucuronic acid decarboxylase 2-like [Sesamum indicum]                                 |
| c40354.graph_c1 | 0.87013974    | 1.46983115    | 0.76873776    | 18.4875799     | 13.9061287     | 16.0043343     | 5.444E-18 | 2.950962  | up        | PREDICTED: GATA transcription factor 8 [Sesamum indicum]                                              |
| c40357.graph_c0 | 0.68229528    | 0.64280329    | 0.61890102    | 6.61852409     | 3.29032399     | 4.14541615     | 0.0036681 | 1.849643  | up        | ribulose-1,5-bisphosphate carboxylase/oxygenase large subunit (chloroplast) [Andrographis paniculata] |
| c40359.graph_c0 | 6.08160605    | 7.57249973    | 5.33714457    | 33.616633      | 52.4781324     | 63.7147318     | 7.097E-06 | 1.955406  | up        | chloroplast 1-deoxy-D-xylulose 5-phosphate reductoisomerase [Mitragyna speciosa]                      |
| c40360.graph_c0 | 5.91991072    | 4.12484845    | 5.70548974    | 5.0527926      | 3.51190378     | 3.3541173      | 2.947E-06 | -1.412616 | down      | PREDICTED: type I inositol 1,4,5-trisphosphate 5-phosphatase CVP2-like isoform X1 [Sesamum indicum]   |
| c40365.graph_c1 | 2.85125968    | 2.9001489     | 2.48205204    | 0.4660392      | 0.26929747     | 0.41467888     | 7.352E-16 | -3.84872  | down      | -                                                                                                     |
| c40366.graph_c0 | 21.9938837    | 22.3515156    | 22.6621097    | 183.595302     | 176.696431     | 167.044786     | 4.493E-44 | 1.959838  | up        | PREDICTED: F-box/kelch-repeat protein At1g67480-like [Sesamum indicum]                                |
| c40367.graph_c0 | 21.1762944    | 22.6695478    | 23.0549303    | 14.6994773     | 15.7517183     | 13.9233456     | 1.615E-23 | -1.610786 | down      | PREDICTED: probable protein phosphatase 2C 55 [Sesamum indicum]                                       |
| c40370.graph_c0 | 2.85247401    | 2.52119593    | 2.41769794    | 12.5523448     | 11.2245512     | 11.1192504     | 2.101E-06 | 1.149324  | up        | PREDICTED: carboxyl-terminal-processing peptidase 2, chloroplastic [Sesamum indicum]                  |
| c40376.graph_c1 | 316.99601     | 287.237436    | 317.935424    | 26.8219508     | 24.7775352     | 18.042704      | 7.72E-192 | -4.740865 | down      | PREDICTED: protein SRG1 [Sesamum indicum]                                                             |

| #ID             | 0 h-1<br>FPKM | 0 h-2<br>FPKM | 0 h-3<br>FPKM | 48 h-1<br>FPKM | 48 h-2<br>FPKM | 48 h-3<br>FPKM | FDR       | log2FC    | regulated | nr_annotation                                                                              |
|-----------------|---------------|---------------|---------------|----------------|----------------|----------------|-----------|-----------|-----------|--------------------------------------------------------------------------------------------|
| c40377.graph_c0 | 9.57542268    | 4.56429096    | 7.03131271    | 0              | 0              | 0              | 8.944E-16 | -Inf      | down      | predicted protein [Hordeum vulgare subsp. vulgare]                                         |
| c40378.graph_c0 | 24.386558     | 24.6129595    | 24.4478452    | 24.6706468     | 22.4220026     | 20.7466893     | 1.902E-14 | -1.129492 | down      | PREDICTED: plectin-like [Solanum tuberosum]                                                |
| c40382.graph_c0 | 0.11301803    | 0.1319864     | 0.14523265    | 1.68326661     | 2.1876578      | 1.80657711     | 1.331E-08 | 2.839667  | up        | PREDICTED: uncharacterized protein LOC105160401 [Sesamum indicum]                          |
| c40383.graph_c0 | 7.55999292    | 8.86647319    | 8.2649066     | 7.77904627     | 7.61691949     | 6.53635056     | 2.282E-12 | -1.187106 | down      | PREDICTED: uncharacterized protein LOC105169210 [Sesamum indicum]                          |
| c40384.graph_c0 | 18.2566152    | 16.8821998    | 16.2217399    | 9.31620267     | 10.1674558     | 11.794458      | 1.119E-24 | -1.734731 | down      | PREDICTED: uncharacterized protein LOC105179476 isoform X3 [Sesamum indicum]               |
| c40386.graph_c0 | 12.9190282    | 12.8332474    | 11.2788564    | 8.08599067     | 6.44865713     | 4.76963019     | 1.843E-10 | -1.94886  | down      | PREDICTED: uncharacterized protein LOC105178241 [Sesamum indicum]                          |
| c40386.graph_c1 | 25.1870859    | 26.5214887    | 24.2341406    | 17.0240302     | 14.6996753     | 11.4819545     | 9.755E-30 | -1.825631 | down      | PREDICTED: uncharacterized protein LOC105178241 [Sesamum indicum]                          |
| c40388.graph_c0 | 14.1305795    | 13.4018987    | 14.9001811    | 8.28936835     | 8.23839008     | 6.26058432     | 1.55E-27  | -1.912938 | down      | PREDICTED: uncharacterized protein LOC105162418 [Sesamum indicum]                          |
| c40392.graph_c0 | 1.58224697    | 1.64359857    | 1.07416981    | 1.1826372      | 1.07804294     | 0.95441478     | 0.0005251 | -1.430061 | down      | hypothetical protein [Lotus japonicus]                                                     |
| c40394.graph_c0 | 32.8013802    | 30.6669502    | 31.9958634    | 22.8386091     | 22.3457942     | 22.5845489     | 6.783E-21 | -1.511391 | down      | -                                                                                          |
| c40395.graph_c0 | 49.7588082    | 51.0113994    | 46.6849543    | 499.042444     | 601.933414     | 676.786176     | 5.343E-37 | 2.570727  | up        | PREDICTED: bidirectional sugar transporter SWEET7-like [Sesamum indicum]                   |
| c40408.graph_c0 | 31.5894447    | 32.1750848    | 29.2963874    | 10.3348311     | 9.72276695     | 8.39319496     | 1.678E-76 | -2.7239   | down      | PREDICTED: nucleonin-like isoform X1 [Sesamum indicum]                                     |
| c40413.graph_c1 | 3.09140736    | 4.54505118    | 4.22086715    | 4.36100933     | 1.97998311     | 3.2468652      | 0.0035072 | -1.314272 | down      | PREDICTED: uncharacterized protein LOC100784245 [Glycine max]                              |
| c40414.graph_c0 | 1.70245234    | 1.54923371    | 1.29274284    | 0.10693705     | 0.22657369     | 0.12686926     | 4.199E-15 | -4.328169 | down      | hypothetical protein MIMGU_mgv1a005040mg [Erythranthe guttata]                             |
| c40418.graph_c0 | 0             | 0.2933403     | 0.75315363    | 28.7522184     | 37.1805969     | 44.4409102     | 7.437E-30 | 5.677089  | up        | PREDICTED: organ-specific protein S2-like [Nicotiana tomentosiformis]                      |
| c40426.graph_c0 | 0.80322063    | 1.05141723    | 0.63518173    | 4.78140431     | 4.94471528     | 6.68558755     | 0.0003032 | 1.703525  | up        | hypothetical protein JCGZ_05663 [Jatropha curcas]                                          |
| c40427.graph_c0 | 3.83103857    | 4.44845474    | 3.93842899    | 1.41176105     | 0.59823586     | 0.87932354     | 5.919E-09 | -3.083254 | down      | -                                                                                          |
| c40428.graph_c0 | 0.50569709    | 0.78231445    | 0.53168791    | 21.8964138     | 22.7030508     | 24.1939592     | 7.968E-45 | 4.2232    | up        | PREDICTED: cytokinin hydroxylase [Sesamum indicum]                                         |
| c40431.graph_c0 | 19.2174528    | 18.3661613    | 19.0801671    | 18.6423509     | 17.1202092     | 14.5882679     | 6.908E-16 | -1.184993 | down      | PREDICTED: DNA repair helicase UVH6 isoform X1 [Sesamum indicum]                           |
| c40435.graph_c0 | 139.760249    | 132.304054    | 124.560655    | 82.1827046     | 66.4958003     | 60.3040691     | 4.612E-40 | -1.935718 | down      | PREDICTED: probable polyamine oxidase 4 [Sesamum indicum]                                  |
| c40439.graph_c0 | 15.9636002    | 16.5513596    | 15.1825731    | 288.927299     | 320.841872     | 284.662363     | 7.44E-102 | 3.211116  | up        | PREDICTED: transcription factor GAMYB-like isoform X1 [Sesamum indicum]                    |
| c40440.graph_c0 | 3.34428078    | 4.08919308    | 3.12795138    | 14.0398614     | 15.637865      | 14.817593      | 1.023E-08 | 1.057267  | up        | PREDICTED: armadillo repeat-containing kinesin-like protein 2 isoform X2 [Sesamum indicum] |

| #ID             | 0 h-1<br>FPKM | 0 h-2<br>FPKM | 0 h-3<br>FPKM | 48 h-1<br>FPKM | 48 h-2<br>FPKM | 48 h-3<br>FPKM | FDR       | log2FC    | regulated | nr_annotation                                                                                                   |
|-----------------|---------------|---------------|---------------|----------------|----------------|----------------|-----------|-----------|-----------|-----------------------------------------------------------------------------------------------------------------|
| c40441.graph_c0 | 3.36191983    | 1.762769      | 2.88013339    | 78.5366456     | 81.871977      | 91.3379883     | 6.32E-80  | 3.955545  | up        | PREDICTED: 60S acidic ribosomal protein P2B-like [Sesamum indicum]                                              |
| c40442.graph_c0 | 142.320902    | 142.543857    | 140.857834    | 79.1430001     | 93.1364493     | 88.8002448     | 5.214E-33 | -1.725454 | down      | PREDICTED: la-related protein 6A [Sesamum indicum]                                                              |
| c40444.graph_c0 | 90.0435533    | 88.2219808    | 89.9605393    | 9.86448751     | 8.3724052      | 6.95516085     | 2.71E-179 | -4.425142 | down      | PREDICTED: UDP-glycosyltransferase 76C4-like [Sesamum indicum]                                                  |
| c40447.graph_c0 | 54.1137869    | 55.1197409    | 54.7435283    | 53.1665374     | 53.9430652     | 47.6291987     | 6.948E-15 | -1.10047  | down      | PREDICTED: E3 ubiquitin-protein ligase MBR2 [Sesamum indicum]                                                   |
| c40451.graph_c0 | 0.18339036    | 0.30595666    | 0.23566387    | 4.33641309     | 5.22034528     | 5.93810316     | 2.722E-14 | 3.395428  | up        | PREDICTED: rop guanine nucleotide exchange factor 1-like [Sesamum indicum]                                      |
| c40453.graph_c0 | 10.3888921    | 11.1311602    | 9.72309531    | 9.74323296     | 10.023073      | 9.408187       | 5.126E-13 | -1.115338 | down      | PREDICTED: protein NLP9 [Sesamum indicum]                                                                       |
| c40458.graph_c0 | 8.07987442    | 8.35982957    | 6.54388143    | 2.87739947     | 3.77718658     | 3.89609766     | 7.148E-11 | -2.143582 | down      | PREDICTED: protein tesmin/TSO1-like CXC 5 [Sesamum indicum]                                                     |
| c40461.graph_c0 | 3.034377      | 4.13847858    | 3.65558867    | 2.97018264     | 3.0354937      | 3.82436035     | 0.000478  | -1.159922 | down      | PREDICTED: protein phosphatase 2C 16-like [Sesamum indicum]                                                     |
| c40462.graph_c0 | 0.74234526    | 0.86693671    | 0.5962144     | 3.12027947     | 4.45269195     | 5.17248225     | 4.411E-06 | 1.508808  | up        | PREDICTED: paramyosin-like [Sesamum indicum]                                                                    |
| c40463.graph_c0 | 68.4468411    | 69.4612898    | 63.7515502    | 27.6548471     | 26.9913205     | 25.5366615     | 1.273E-60 | -2.346245 | down      | PREDICTED: lipase 3-like [Sesamum indicum]                                                                      |
| c40465.graph_c0 | 1.99538377    | 2.09725094    | 1.88037458    | 11.1828559     | 12.0091659     | 10.5501904     | 2.938E-08 | 1.481022  | up        | PREDICTED: uncharacterized protein LOC105160301 [Sesamum indicum]                                               |
| c40469.graph_c0 | 1.74211814    | 1.22070383    | 1.56708355    | 11.8766512     | 14.4521501     | 15.4803591     | 1.725E-16 | 2.184615  | up        | PREDICTED: pentatricopeptide repeat-containing protein At3g58590 [Sesamum indicum]                              |
| c40470.graph_c0 | 10.989404     | 12.3754593    | 11.5181088    | 7.11854702     | 9.78685031     | 11.0634571     | 8.227E-13 | -1.342781 | down      | PREDICTED: mechanosensitive ion channel protein 2, chloroplastic-like [Sesamum indicum]                         |
| c40473.graph_c0 | 6.33380191    | 6.95869492    | 5.75698538    | 4.17471388     | 4.77440112     | 5.57195296     | 1.873E-06 | -1.41133  | down      | PREDICTED: uncharacterized protein LOC105164092 [Sesamum indicum]                                               |
| c40477.graph_c0 | 8.3372749     | 8.41403017    | 8.29874859    | 33.0528013     | 36.2493123     | 38.877462      | 1.487E-11 | 1.090927  | up        | PREDICTED: dolichyl-diphosphooligosaccharide--protein glycosyltransferase 48 kDa subunit-like [Sesamum indicum] |
| c40478.graph_c0 | 4.12455477    | 4.46612548    | 5.01991629    | 1.33358677     | 1.12247756     | 1.04032218     | 1.078E-30 | -2.976015 | down      | PREDICTED: disease resistance protein RPM1-like [Solanum tuberosum]                                             |
| c40482.graph_c0 | 21.3120606    | 22.0530265    | 21.3223995    | 20.0506698     | 19.2155825     | 17.8029453     | 1.37E-17  | -1.196633 | down      | PREDICTED: FIP1[V]-like protein isoform X1 [Sesamum indicum]                                                    |
| c40483.graph_c0 | 2.18100831    | 1.09159613    | 1.33461049    | 0              | 0              | 0              | 1.935E-13 | -Inf      | down      | -                                                                                                               |
| c40484.graph_c0 | 0             | 0             | 0             | 3.14600991     | 2.49182506     | 1.98828835     | 9.188E-16 | Inf       | up        | PREDICTED: probable receptor-like protein kinase At5g39020 [Sesamum indicum]                                    |
| c40490.graph_c0 | 1.36277783    | 0.62006475    | 0.63680853    | 6.73393725     | 5.68284965     | 5.38247957     | 0.0013197 | 1.756581  | up        | -                                                                                                               |
| c40492.graph_c0 | 7.27085128    | 7.62470965    | 8.2628104     | 3.32640761     | 2.89637713     | 2.83818115     | 5.692E-16 | -2.369528 | down      | PREDICTED: zinc finger CCCH domain-containing protein 32 [Sesamum indicum]                                      |

| #ID             | 0 h-1<br>FPKM | 0 h-2<br>FPKM | 0 h-3<br>FPKM | 48 h-1<br>FPKM | 48 h-2<br>FPKM | 48 h-3<br>FPKM | FDR       | log2FC    | regulated | nr_annotation                                                                                 |
|-----------------|---------------|---------------|---------------|----------------|----------------|----------------|-----------|-----------|-----------|-----------------------------------------------------------------------------------------------|
| c40493.graph_c0 | 1.35554618    | 1.61536137    | 1.74193051    | 35.5615666     | 33.1372679     | 36.9867646     | 6.827E-40 | 3.468067  | up        | PREDICTED: clp protease-related protein At4g12060, chloroplastic isoform X1 [Sesamum indicum] |
| c40496.graph_c0 | 0.03726599    | 0.03730331    | 0.04788828    | 2.05991183     | 2.58230172     | 2.65770088     | 7.768E-12 | 4.87286   | up        | PREDICTED: uncharacterized protein LOC105173890 [Sesamum indicum]                             |
| c40497.graph_c0 | 4.46580523    | 3.62933385    | 3.8637038     | 3.62537628     | 3.06388659     | 2.46468522     | 3.708E-05 | -1.397103 | down      | PREDICTED: probable tyrosine-protein phosphatase At1g05000 [Sesamum indicum]                  |
| c40498.graph_c0 | 19.9657721    | 20.5087568    | 21.2447959    | 19.425198      | 19.6316601     | 19.6094089     | 1.13E-11  | -1.091378 | down      | hypothetical protein M569_11555, partial [Genlisea aurea]                                     |
| c40499.graph_c0 | 1114.41988    | 1191.90246    | 1168.8041     | 61.0273284     | 70.647282      | 72.0236598     | 1.7E-126  | -5.113137 | down      | PREDICTED: legumin B-like [Sesamum indicum]                                                   |
| c40500.graph_c0 | 6.92641418    | 6.08928995    | 6.03700768    | 0.38841262     | 0.47025837     | 0.54309705     | 4.128E-29 | -4.785687 | down      | hypothetical protein M569_14517 [Genlisea aurea]                                              |
| c40512.graph_c0 | 1.30129141    | 1.6673209     | 1.5384341     | 0.38362705     | 1.06681664     | 0.72536671     | 2.699E-05 | -2.083522 | down      | hypothetical protein MIMGU_mgv1a023619mg [Erythranthe guttata]                                |
| c40522.graph_c0 | 1.59900543    | 1.65988832    | 1.90257897    | 17.6772972     | 19.4783429     | 20.6323762     | 2.191E-16 | 2.46343   | up        | PREDICTED: branched-chain-amino-acid aminotransferase-like protein 1 [Sesamum indicum]        |
| c40522.graph_c1 | 1.08163354    | 1.79208271    | 1.62958709    | 18.7955117     | 19.0743334     | 20.3318988     | 1.439E-27 | 2.671659  | up        | hypothetical protein MIMGU_mgv1a0045111mg, partial [Erythranthe guttata]                      |
| c40523.graph_c1 | 28.6683702    | 29.1660567    | 25.1142661    | 22.2593773     | 21.1642106     | 15.4536378     | 1.108E-26 | -1.50711  | down      | PREDICTED: uncharacterized protein LOC105164312 [Sesamum indicum]                             |
| c40525.graph_c0 | 25.8431431    | 24.2547942    | 27.5240022    | 4.9140515      | 5.48832924     | 6.67737376     | 1.856E-73 | -3.206122 | down      | PREDICTED: U-box domain-containing protein 4 [Sesamum indicum]                                |
| c40526.graph_c0 | 0.25772169    | 0             | 0.11039419    | 1.50372354     | 1.34148443     | 1.58447862     | 1.676E-05 | 2.577394  | up        | PREDICTED: SNARE-interacting protein KEULE-like isoform X1 [Sesamum indicum]                  |
| c40527.graph_c0 | 19.0173576    | 20.4612809    | 18.5114627    | 10.4910361     | 14.0036156     | 12.3453534     | 1.272E-26 | -1.67588  | down      | PREDICTED: serine/threonine-protein kinase PEPKR2-like [Sesamum indicum]                      |
| c40528.graph_c0 | 1.38491192    | 1.27450042    | 1.34910214    | 15.2075615     | 16.1977694     | 19.3360841     | 1.613E-37 | 2.642004  | up        | PREDICTED: magnesium-chelatase subunit ChlH, chloroplastic [Sesamum indicum]                  |
| c40528.graph_c1 | 0.85256645    | 0.85342017    | 0.76214375    | 9.56187614     | 9.73169786     | 10.7566691     | 1.092E-14 | 2.588555  | up        | PREDICTED: magnesium-chelatase subunit ChlH, chloroplastic [Sesamum indicum]                  |
| c40531.graph_c2 | 0.7105644     | 0             | 0             | 2.53664579     | 2.77395472     | 3.13080527     | 3.393E-05 | 2.571716  | up        | PREDICTED: AR-4 complex subunit epsilon [Sesamum indicum]                                     |
| c40537.graph_c2 | 2.44661951    | 2.72737278    | 2.88200269    | 13.950804      | 21.2552542     | 22.5628056     | 8.109E-09 | 1.815469  | up        | PREDICTED: transcription factor bHLH143-like [Sesamum indicum]                                |
| c40538.graph_c0 | 2.03557613    | 2.51147827    | 2.61579591    | 13.9121501     | 15.2002498     | 13.9311666     | 2.024E-08 | 1.566841  | up        | PREDICTED: DNA-repair protein AKC1 [Sesamum indicum]                                          |
| c40553.graph_c0 | 0.47623041    | 0.39725607    | 0.4419819     | 3.09551576     | 3.5117166      | 3.49176205     | 5.629E-06 | 1.920949  | up        | PREDICTED: uncharacterized protein LOC105177782 [Sesamum indicum]                             |
| c40558.graph_c0 | 74.463538     | 64.9781049    | 76.5125234    | 30.932165      | 27.3316716     | 29.3173628     | 4.844E-48 | -2.318404 | down      | unnamed protein product [Coffea canephora]                                                    |
| c40559.graph_c0 | 1.08706613    | 0.92074625    | 0.6447337     | 4.31405141     | 6.16162829     | 5.6551054      | 0.0001519 | 1.585751  | up        | PREDICTED: chromatin assembly factor 1 subunit FAS2 isoform X2 [Sesamum indicum]              |

| #ID             | 0 h-1<br>FPKM | 0 h-2<br>FPKM | 0 h-3<br>FPKM | 48 h-1<br>FPKM | 48 h-2<br>FPKM | 48 h-3<br>FPKM | FDR       | log2FC    | regulated | nr_annotation                                                                                                                 |
|-----------------|---------------|---------------|---------------|----------------|----------------|----------------|-----------|-----------|-----------|-------------------------------------------------------------------------------------------------------------------------------|
| c40564.graph_c0 | 2.72879673    | 2.91671763    | 3.80378233    | 2.04524382     | 2.39238448     | 1.78193221     | 4.231E-05 | -1.625268 | down      | hypothetical protein MIMGU_mgv1a001712mg [Erythranthe guttata]                                                                |
| c40566.graph_c0 | 37.5048816    | 34.4490528    | 32.6115227    | 8.1527057      | 4.79822396     | 5.02806315     | 1.219E-95 | -3.545716 | down      | hypothetical protein F775_27779 [Aegilops tauschii]                                                                           |
| c40570.graph_c0 | 0.92824794    | 0.25341203    | 0.27109894    | 54.6526611     | 62.3452144     | 63.7788047     | 8.49E-142 | 5.948648  | up        | PREDICTED: transmembrane emp24 domain-containing protein p24delta3-like [Sesamum indicum]                                     |
| c40576.graph_c0 | 67.6700635    | 69.7781208    | 69.1478905    | 450.383946     | 453.753219     | 481.742482     | 2.628E-33 | 1.727776  | up        | PREDICTED: 40S ribosomal protein S4-like [Sesamum indicum]                                                                    |
| c40579.graph_c0 | 68.5207675    | 69.2775685    | 58.8975914    | 19.4233232     | 21.4712929     | 19.1613166     | 2.2E-34   | -2.728442 | down      | -                                                                                                                             |
| c40586.graph_c0 | 0.49447727    | 0.44547517    | 0.38125372    | 4.41878369     | 6.03242978     | 5.22889817     | 1.252E-07 | 2.54917   | up        | PREDICTED: uncharacterized protein LOC105171062 [Sesamum indicum]                                                             |
| c40588.graph_c0 | 0.20644942    | 0.28046191    | 0.32214475    | 7.49910404     | 7.46945497     | 7.7364147      | 1.21E-41  | 3.789393  | up        | PREDICTED: protein phosphatase 2C and cyclic nucleotide-binding/kinase domain-containing protein isoform X1 [Sesamum indicum] |
| c40590.graph_c0 | 4.55473685    | 3.98938551    | 4.04833688    | 29.652586      | 32.2653316     | 30.9584544     | 1.625E-23 | 1.864823  | up        | PREDICTED: urease accessory protein G isoform X1 [Sesamum indicum]                                                            |
| c40591.graph_c0 | 50.1982016    | 51.0302069    | 60.5481856    | 0.07994098     | 0.12703166     | 0.14226201     | 9.97E-147 | -9.883933 | down      | PREDICTED: cytokinin hydroxylase [Sesamum indicum]                                                                            |
| c40592.graph_c0 | 2.85022471    | 4.10564995    | 3.9306505     | 0              | 0.27138833     | 0              | 9.566E-24 | -6.380724 | down      | -                                                                                                                             |
| c40593.graph_c0 | 0.24220263    | 0.09697806    | 0.18674398    | 2.23132863     | 1.5601226      | 1.6280467      | 4.92E-05  | 2.354961  | up        | photosynthetic-responsive NPH15 family protein 11 neoplastoma 20001                                                           |
| c40597.graph_c0 | 3.99741375    | 4.39592242    | 4.26863748    | 45.5925945     | 40.1399573     | 31.7990481     | 1.029E-11 | 2.201071  | up        | PREDICTED: uncharacterized protein LOC105174543 [Sesamum indicum]                                                             |
| c40600.graph_c1 | 62.2609693    | 67.7213966    | 57.4738119    | 41.690272      | 63.1938817     | 69.5854507     | 1.505E-12 | -1.127864 | down      | PREDICTED: auxin response factor 19-like [Sesamum indicum]                                                                    |
| c40608.graph_c0 | 88.1698792    | 88.6187733    | 90.1553533    | 46.8781733     | 48.9585652     | 43.1884447     | 4.291E-39 | -1.958734 | down      | PREDICTED: nuclear ribonucleic acid binding protein, putative [Sesamum indicum]                                               |
| c40610.graph_c0 | 1.36968901    | 0.82263633    | 1.12646695    | 9.4386145      | 8.55535193     | 8.03913162     | 6.41E-07  | 1.957121  | up        | PREDICTED: vesicle transport protein SFT2B [Sesamum indicum]                                                                  |
| c40615.graph_c0 | 0.33671635    | 1.15561206    | 0.49450724    | 13.2058726     | 10.0465249     | 7.84681442     | 1.214E-07 | 2.960658  | up        | PREDICTED: cytochrome P450 CYP72A219-like [Sesamum indicum]                                                                   |
| c40618.graph_c0 | 5.17681386    | 4.4309835     | 5.88111676    | 0.95038776     | 2.39806359     | 2.16793733     | 3.235E-18 | -2.523281 | down      | PREDICTED: uncharacterized protein LOC105170597 [Sesamum indicum]                                                             |
| c40622.graph_c0 | 12.2280945    | 11.4572871    | 13.0682008    | 90.3501282     | 86.9150111     | 89.3705566     | 6.322E-36 | 1.841041  | up        | PREDICTED: NADH dehydrogenase [ubiquinone] 1 alpha subcomplex subunit 9, mitochondrial [Sesamum indicum]                      |
| c40623.graph_c1 | 0.19182205    | 0             | 0             | 4.94813146     | 4.6803083      | 2.51589578     | 1.578E-08 | 4.993688  | up        | PREDICTED: E3 ubiquitin-protein ligase RMA1H1-like [Sesamum indicum]                                                          |
| c40624.graph_c0 | 37.5408725    | 34.771925     | 36.0290599    | 5.13241548     | 6.36113571     | 7.19344428     | 9.43E-106 | -3.557611 | down      | hypothetical protein MIMGU_mgv1a008212mg [Erythranthe guttata]                                                                |
| c40632.graph_c1 | 61.9054208    | 61.6134941    | 67.3663266    | 1.27328473     | 1.0038257      | 1.21200489     | 0         | -6.788967 | down      | PREDICTED: cytochrome P450 71A1-like [Vitis vinifera]                                                                         |
| c40642.graph_c0 | 0.03860267    | 0.03864132    | 0             | 0.81795582     | 1.43165001     | 1.58220036     | 2.38E-08  | 4.62126   | up        | PREDICTED: uncharacterized protein LOC105163904 [Sesamum indicum]                                                             |



| #ID             | 0 h-1<br>FPKM | 0 h-2<br>FPKM | 0 h-3<br>FPKM | 48 h-1<br>FPKM | 48 h-2<br>FPKM | 48 h-3<br>FPKM | FDR       | log2FC    | regulated | nr_annotation                                                                               |
|-----------------|---------------|---------------|---------------|----------------|----------------|----------------|-----------|-----------|-----------|---------------------------------------------------------------------------------------------|
| c40645.graph_c0 | 0.52365902    | 0.10483668    | 0             | 3.18403039     | 3.57752406     | 3.69165566     | 2.432E-06 | 3.055737  | up        | PREDICTED: auxin response factor 17-like isoform X3 [Zea mays]                              |
| c40646.graph_c0 | 389.052741    | 403.702315    | 394.744712    | 6.81124041     | 5.63175283     | 6.87360818     | 0         | -6.957313 | down      | PREDICTED: transcription factor PIF3 isoform X2 [Sesamum indicum]                           |
| c40646.graph_c1 | 308.731804    | 313.052762    | 320.830782    | 4.90281631     | 4.5527123      | 4.63178638     | 0         | -7.080667 | down      | unnamed protein product [Vitis vinifera]                                                    |
| c40647.graph_c0 | 35.1366365    | 36.1097357    | 32.0168507    | 14.7529463     | 16.1693206     | 14.1744565     | 5.283E-46 | -2.212343 | down      | PREDICTED: protein FAM63A-like [Sesamum indicum]                                            |
| c40647.graph_c1 | 17.5658582    | 15.8073419    | 13.680499     | 7.84621301     | 8.13894229     | 6.98151315     | 1.259E-08 | -2.049474 | down      | -                                                                                           |
| c40651.graph_c0 | 203.782242    | 200.262068    | 196.890152    | 74.4718021     | 81.8647421     | 75.8299482     | 5.137E-58 | -2.390403 | down      | PREDICTED: type I inositol 1,4,5-trisphosphate 5-phosphatase CVP2 [Sesamum indicum]         |
| c40652.graph_c0 | 49.848473     | 49.6224529    | 49.3565627    | 22.6655507     | 21.7470219     | 18.0398025     | 7.397E-57 | -2.267899 | down      | PREDICTED: uncharacterized protein LOC105173727 [Sesamum indicum]                           |
| c40655.graph_c0 | 18.4506715    | 20.7190961    | 19.3395968    | 8.93113258     | 14.230329      | 14.6280051     | 8.671E-29 | -1.656576 | down      | PREDICTED: DEAD-box ATP-dependent RNA helicase 24 isoform X1 [Sesamum indicum]              |
| c40656.graph_c0 | 11.4675273    | 10.3231377    | 10.5404954    | 7.29986872     | 6.95610709     | 7.37666191     | 1.474E-14 | -1.596129 | down      | PREDICTED: putative GTP diphosphokinase RSH1, chloroplastic [Sesamum indicum]               |
| c40658.graph_c0 | 17.5678315    | 16.7950669    | 14.9149563    | 6.80118253     | 6.62708476     | 6.01928954     | 4.273E-37 | -2.355932 | down      | PREDICTED: protein DOS2-like [Sesamum indicum]                                              |
| c40661.graph_c0 | 0.59885284    | 1.02763286    | 0.9344531     | 2.73880783     | 4.4878308      | 5.17199674     | 0.0018811 | 1.246149  | up        | unnamed protein product [Coffea canephora]                                                  |
| c40668.graph_c0 | 3.17720903    | 3.92001622    | 2.94344235    | 0.06807098     | 0.2884518      | 0.06056915     | 1.832E-20 | -5.623284 | down      | hypothetical protein MIMGU_mgv1a010491mg [Erythranthe guttata]                              |
| c40673.graph_c0 | 0.13113713    | 0.06563422    | 0             | 9.9065901      | 6.91123015     | 4.83740358     | 1.042E-08 | 5.792976  | up        | PREDICTED: GDSL esterase/lipase At4g10955-like [Sesamum indicum]                            |
| c40682.graph_c0 | 149.821317    | 165.358277    | 144.258667    | 41.464196      | 41.1125518     | 39.9075386     | 2.106E-74 | -2.923501 | down      | PREDICTED: splicing factor 3B subunit 1-like [Sesamum indicum]                              |
| c40684.graph_c0 | 5.27320862    | 6.64698608    | 5.64690155    | 5.21787734     | 5.81362429     | 6.08371598     | 0.006746  | -1.057192 | down      | unknown protein [Ipomoea batatas]                                                           |
| c40685.graph_c0 | 8.03374693    | 8.59009548    | 5.27915602    | 46.4257823     | 53.1028301     | 62.1137446     | 6E-18     | 1.866911  | up        | PREDICTED: uncharacterized protein LOC105159330 [Sesamum indicum]                           |
| c40689.graph_c0 | 97.5574953    | 99.0684287    | 91.0304068    | 6.2757349      | 6.37279963     | 7.20437142     | 1.55E-206 | -4.874793 | down      | PREDICTED: zinc finger AN1 domain-containing stress-associated protein 12 [Sesamum indicum] |
| c40691.graph_c0 | 57.0112977    | 60.2426038    | 46.2979736    | 576.069551     | 378.360484     | 261.103301     | 0.0043302 | 1.890403  | up        | PREDICTED: chaperone protein dnaJ 20, chloroplastic-like [Sesamum indicum]                  |
| c40692.graph_c0 | 0             | 0             | 0             | 5.32019215     | 4.01030084     | 4.94629245     | 1.417E-22 | Inf       | up        | hypothetical protein MIMGU_mgv1a008779mg [Erythranthe guttata]                              |
| c40701.graph_c1 | 161.828015    | 154.559325    | 174.613496    | 60.3119791     | 59.4082828     | 40.1619965     | 2.167E-71 | -2.634027 | down      | PREDICTED: glutathione S-transferase F9-like [Sesamum indicum]                              |
| c40704.graph_c0 | 0.5325438     | 0.31357474    | 0.32204229    | 2.30877218     | 2.04841124     | 2.00297331     | 0.004006  | 1.433688  | up        | PREDICTED: protein trichome birefringence-like 3 [Sesamum indicum]                          |

| #ID             | 0 h-1<br>FPKM | 0 h-2<br>FPKM | 0 h-3<br>FPKM | 48 h-1<br>FPKM | 48 h-2<br>FPKM | 48 h-3<br>FPKM | FDR       | log2FC    | regulated | nr_annotation                                                                   |
|-----------------|---------------|---------------|---------------|----------------|----------------|----------------|-----------|-----------|-----------|---------------------------------------------------------------------------------|
| c40707.graph_c0 | 57.3609618    | 56.7819892    | 55.1017757    | 9.17622779     | 8.41116512     | 7.87541499     | 3.04E-106 | -3.747426 | down      | PREDICTED: uncharacterized protein LOC104230730, partial [Nicotiana sylvestris] |
| c40708.graph_c0 | 5.82118911    | 5.82701815    | 6.10247928    | 2.82255742     | 3.43868093     | 4.01839139     | 0.0001081 | -1.810826 | down      | PREDICTED: nuclear transcription factor Y subunit B-3-like [Sesamum indicum]    |
| c40708.graph_c1 | 5.65590466    | 4.83185561    | 5.45104606    | 1.93151117     | 2.4268906      | 3.83697941     | 4.373E-09 | -1.984799 | down      | PREDICTED: nuclear transcription factor Y subunit B-3-like [Solanum tuberosum]  |
| c40711.graph_c1 | 5.62647142    | 6.16011537    | 7.23023854    | 3.07768678     | 3.08883406     | 4.61222263     | 0.0001369 | -1.842293 | down      | -                                                                               |
| c40711.graph_c2 | 24.2935632    | 23.7818238    | 23.1477565    | 16.796824      | 17.2952956     | 15.304889      | 7.01E-26  | -1.544541 | down      | PREDICTED: DEAD-box ATP-dependent RNA helicase 32 [Sesamum indicum]             |
| c40713.graph_c0 | 8.09539644    | 8.96080028    | 7.02261593    | 3.83232613     | 3.98027926     | 4.21232916     | 5.234E-28 | -2.018434 | down      | PREDICTED: protein tipD-like [Sesamum indicum]                                  |
| c40715.graph_c1 | 84.0139855    | 94.3883788    | 88.1125125    | 68.9862107     | 61.8782357     | 59.330269      | 1.857E-26 | -1.501718 | down      | PREDICTED: nematode resistance protein-like HSPRO2 [Sesamum indicum]            |
| c40718.graph_c0 | 6.9313805     | 6.05257809    | 7.51733833    | 35.2342395     | 40.1090927     | 42.0702672     | 7.126E-17 | 1.496154  | up        | PREDICTED: uncharacterized protein DDB_G0290685 [Sesamum indicum]               |
| c40728.graph_c0 | 0.73221957    | 0.99681578    | 0.63983318    | 35.8060923     | 29.8140906     | 30.6355827     | 8.56E-51  | 4.333192  | up        | PREDICTED: shaggy-related protein kinase kappa isoform X1 [Sesamum indicum]     |
| c40732.graph_c0 | 0.350088      | 0             | 0             | 8.7081454      | 9.45300745     | 4.40035739     | 2.085E-07 | 5.017184  | up        | hypothetical protein L484_002552 [Morus notabilis]                              |
| c40734.graph_c0 | 15.0200536    | 13.4674538    | 12.3492136    | 48.9229383     | 56.2742841     | 63.0212375     | 6.26E-09  | 1.023205  | up        | unnamed protein product [Coffea canephora]                                      |
| c40735.graph_c0 | 3.24786543    | 2.75388792    | 2.74968938    | 14.3270966     | 14.5438585     | 12.5289085     | 1.132E-06 | 1.226658  | up        | -                                                                               |
| c40736.graph_c0 | 131.097979    | 129.870194    | 126.182798    | 38.6645099     | 36.2836299     | 33.7160341     | 6.935E-85 | -2.84823  | down      | hypothetical protein MIMGU_mgv1a008470mg [Erythranthe guttata]                  |
| c40739.graph_c0 | 0             | 0             | 0             | 1.05879991     | 0.85994709     | 0.72228724     | 2.117E-11 | Inf       | up        | PREDICTED: filament-like plant protein 4 isoform X1 [Sesamum indicum]           |
| c40740.graph_c0 | 31.4146665    | 26.4433311    | 26.2136949    | 1.12758077     | 1.29407969     | 1.25414324     | 3.033E-79 | -5.533947 | down      | -                                                                               |
| c40743.graph_c0 | 0.3403906     | 0.2433796     | 0.06248791    | 3.85267738     | 4.12890318     | 4.02601169     | 1.228E-08 | 3.209547  | up        | PREDICTED: protein N-terminal asparagine amidohydrolase [Sesamum indicum]       |
| c40748.graph_c0 | 83.5682079    | 89.8793576    | 79.3639643    | 37.7231066     | 35.2823014     | 38.3873991     | 3.796E-52 | -2.198357 | down      | PREDICTED: uncharacterized protein LOC105170953 [Sesamum indicum]               |
| c40751.graph_c0 | 0.62681183    | 0.75292738    | 0.72493022    | 8.37316915     | 6.9127613      | 6.26860868     | 2.951E-07 | 2.342714  | up        | PREDICTED: 15-cis-zeta-carotene isomerase, chloroplastic [Sesamum indicum]      |
| c40757.graph_c0 | 2.94296752    | 2.94591446    | 2.73385286    | 2.90724788     | 2.0071106      | 1.80207645     | 0.0001019 | -1.368577 | down      | PREDICTED: uncharacterized protein LOC105167000 [Sesamum indicum]               |
| c40759.graph_c0 | 328.124177    | 320.817172    | 313.354095    | 33.549929      | 23.1143605     | 17.296311      | 2.08E-191 | -4.70864  | down      | hypothetical protein MIMGU_mgv1a008881mg [Erythranthe guttata]                  |
| c40760.graph_c0 | 1.23405132    | 1.38969791    | 0.5451204     | 4.47649872     | 6.96291193     | 9.51533058     | 0.0023557 | 1.70577   | up        | PREDICTED: UDP-glycosyltransferase 86A1-like [Sesamum indicum]                  |

| #ID             | 0 h-1<br>FPKM | 0 h-2<br>FPKM | 0 h-3<br>FPKM | 48 h-1<br>FPKM | 48 h-2<br>FPKM | 48 h-3<br>FPKM | FDR       | log2FC    | regulated | nr_annotation                                                                                                         |
|-----------------|---------------|---------------|---------------|----------------|----------------|----------------|-----------|-----------|-----------|-----------------------------------------------------------------------------------------------------------------------|
| c40763.graph_c0 | 2.80398929    | 2.90615271    | 2.4234162     | 14.5163126     | 17.2672577     | 16.8016564     | 3.44E-15  | 1.559751  | up        | PREDICTED: probable ADP-ribosylation factor GTPase-activating protein AGD14 [Sesamum indicum]                         |
| c40764.graph_c0 | 12.2247323    | 12.6052158    | 14.2183394    | 11.0275911     | 13.6432706     | 12.0391857     | 5.73E-11  | -1.111192 | down      | hypothetical protein MIMGU_mgv1a002739mg [Erythranthe guttata]                                                        |
| c40767.graph_c0 | 0.25073821    | 0.37648394    | 0.08055213    | 1.67472388     | 1.89652321     | 1.23323523     | 0.0027518 | 1.756123  | up        | conserved hypothetical protein [Ricinus communis]                                                                     |
| c40770.graph_c0 | 34.2059952    | 37.4502706    | 32.7094886    | 6.89342367     | 7.95477744     | 6.57185028     | 3.411E-71 | -3.302578 | down      | PREDICTED: O-glucosyltransferase rumi homolog isoform X1 [Sesamum indicum]                                            |
| c40770.graph_c1 | 21.0263151    | 24.5373673    | 18.8172544    | 4.99094925     | 7.22423927     | 5.05648924     | 6.469E-42 | -2.91849  | down      | PREDICTED: O-glucosyltransferase rumi homolog isoform X1 [Sesamum indicum]                                            |
| c40771.graph_c0 | 16.7109041    | 19.1074742    | 15.1520072    | 14.4456369     | 14.6998485     | 13.4281682     | 2.138E-19 | -1.275213 | down      | PREDICTED: uncharacterized protein LOC105178452 [Sesamum indicum]                                                     |
| c40773.graph_c0 | 416.987627    | 388.928516    | 443.193209    | 335.700926     | 366.243363     | 241.123722     | 1.051E-18 | -1.422626 | down      | hypothetical protein MIMGU_mgv1a016776mg [Erythranthe guttata]                                                        |
| c40774.graph_c0 | 27.3662502    | 23.9728404    | 28.9977274    | 6.37160708     | 7.38523406     | 7.35912646     | 4.521E-53 | -2.949066 | down      | PREDICTED: uncharacterized protein LOC105165423 [Sesamum indicum]                                                     |
| c40776.graph_c0 | 3.50536808    | 3.30447751    | 2.66773537    | 0.90924114     | 0.63108221     | 0.69744595     | 9.913E-16 | -3.090687 | down      | -                                                                                                                     |
| c40777.graph_c0 | 16.3683458    | 19.1213732    | 17.0703973    | 1.6145169      | 2.29191574     | 1.83883191     | 3.205E-97 | -4.215801 | down      | PREDICTED: formin-like protein 6 [Sesamum indicum]                                                                    |
| c40778.graph_c0 | 53.9724016    | 58.0442363    | 53.7002087    | 41.566873      | 47.4522936     | 47.8600574     | 3.439E-20 | -1.295465 | down      | hypothetical protein MIMGU_mgv1a004204mg [Erythranthe guttata]                                                        |
| c40780.graph_c0 | 0.32711161    | 0.28066214    | 0.18015059    | 4.17594082     | 3.6029725      | 3.14113007     | 2.73E-07  | 2.784838  | up        | hypothetical protein MIMGU_mgv1a009114mg [Erythranthe guttata]                                                        |
| c40783.graph_c0 | 42.3671141    | 41.4588598    | 37.8335624    | 33.9096848     | 35.4484433     | 34.748848      | 5.439E-19 | -1.241765 | down      | PREDICTED: uncharacterized protein LOC105128229 [Populus euphratica]                                                  |
| c40785.graph_c0 | 3.5182278     | 3.71923212    | 3.78867814    | 25.4249043     | 30.8924282     | 31.6523319     | 1.884E-42 | 1.974249  | up        | PREDICTED: alpha-mannosidase-like [Sesamum indicum]                                                                   |
| c40788.graph_c0 | 2.49911446    | 2.15192855    | 2.4862924     | 23.4195752     | 26.2526536     | 26.720104      | 2.854E-38 | 2.399746  | up        | PREDICTED: phosphoribosylaminoimidazole carboxylase, chloroplastic-like isoform X1 [Sesamum indicum]                  |
| c40790.graph_c0 | 15.459566     | 15.6310448    | 13.6179284    | 15.390938      | 13.9016949     | 12.187318      | 4.354E-12 | -1.121105 | down      | PREDICTED: 5'-3' exoribonuclease 3 isoform X4 [Sesamum indicum]                                                       |
| c40796.graph_c0 | 126.990996    | 124.539503    | 135.663433    | 104.071366     | 101.730752     | 102.5349       | 4.988E-21 | -1.346389 | down      | PREDICTED: 2-alkenal reductase (NADP(+)-dependent)-like [Sesamum indicum]                                             |
| c40799.graph_c0 | 0.15345267    | 0.05120211    | 0.19719276    | 3.44001817     | 4.74255893     | 4.10916347     | 5.968E-11 | 3.905987  | up        | hypothetical protein MIMGU_mgv1a026254mg [Erythranthe guttata]                                                        |
| c40800.graph_c0 | 0             | 0             | 0             | 1.91262255     | 2.99104485     | 3.97096009     | 1.553E-08 | Inf       | up        | PREDICTED: LOW QUALITY PROTEIN: probable leucine-rich repeat receptor-like protein kinase At1g35710 [Sesamum indicum] |
| c40802.graph_c0 | 0.1151605     | 0.40346535    | 0.2959716     | 1.85663383     | 2.13546799     | 2.31283026     | 0.0004958 | 1.928521  | up        | hypothetical protein MIMGU_mgv1a011194mg [Erythranthe guttata]                                                        |
| c40806.graph_c1 | 5.57899117    | 5.58457769    | 5.29230309    | 71.8018153     | 99.621028      | 112.114581     | 1.917E-20 | 3.083273  | up        | PREDICTED: phenylalanine ammonia-lyase [Sesamum indicum]                                                              |

| #ID             | 0 h-1<br>FPKM | 0 h-2<br>FPKM | 0 h-3<br>FPKM | 48 h-1<br>FPKM | 48 h-2<br>FPKM | 48 h-3<br>FPKM | FDR       | log2FC    | regulated | nr_annotation                                                                                          |
|-----------------|---------------|---------------|---------------|----------------|----------------|----------------|-----------|-----------|-----------|--------------------------------------------------------------------------------------------------------|
| c40807.graph_c0 | 9.53061026    | 10.0157626    | 9.44579657    | 4.96944992     | 8.01954252     | 7.03361919     | 1.102E-16 | -1.558898 | down      | PREDICTED: probable protein phosphatase 2C 38 isoform X2 [Sesamum indicum]                             |
| c40809.graph_c0 | 3.27471402    | 2.99295026    | 3.75073095    | 1.70519313     | 2.91810403     | 2.68440181     | 0.0008049 | -1.483406 | down      | PREDICTED: protein tesmin/TSO1-like CXC 2 isoform X4 [Sesamum indicum]                                 |
| c40809.graph_c1 | 0.23852944    | 0.28652195    | 0.2758678     | 3.34018298     | 2.88668643     | 2.97207473     | 2.02E-08  | 2.506146  | up        | PREDICTED: LOW QUALITY PROTEIN: protein tesmin/TSO1-like CXC 2 [Sesamum indicum]                       |
| c40812.graph_c0 | 8.49866481    | 8.50717493    | 8.41936622    | 0.58635204     | 1.46157386     | 3.09970499     | 5.354E-35 | -3.338998 | down      | hypothetical protein MIMGU_mgv1a008008mg [Erythranthe guttata]                                         |
| c40815.graph_c0 | 0.24014702    | 0.32051666    | 0.30859843    | 7.04277809     | 7.03128006     | 6.75876465     | 2.162E-15 | 3.564341  | up        | PREDICTED: myosin-11 [Sesamum indicum]                                                                 |
| c40816.graph_c0 | 4.2552552     | 3.62058876    | 2.05056427    | 1.56808745     | 1.76502343     | 2.00570751     | 8.562E-05 | -1.908811 | down      | PREDICTED: uncharacterized protein LOC105168692 [Sesamum indicum]                                      |
| c40827.graph_c0 | 16.3515963    | 18.5999658    | 17.1920034    | 10.5563222     | 14.2660639     | 11.5254059     | 4.515E-14 | -1.542253 | down      | PREDICTED: random slug protein 5 [Sesamum indicum]                                                     |
| c40830.graph_c0 | 0.30639798    | 0.40004973    | 0.23966389    | 4.49183532     | 4.13448209     | 4.07324974     | 7.184E-18 | 2.734431  | up        | PREDICTED: auxilin-like protein 1 [Sesamum indicum]                                                    |
| c40838.graph_c0 | 0.15097515    | 0.22668949    | 0.19400904    | 4.31173281     | 8.32510747     | 13.0257194     | 1.482E-05 | 4.456559  | up        | PREDICTED: indole-3-acetic acid-amido synthetase GH3.6 [Sesamum indicum]                               |
| c40843.graph_c0 | 2.92246105    | 3.05257821    | 3.18399235    | 0              | 0              | 0              | 7.732E-27 | -Inf      | down      | -                                                                                                      |
| c40844.graph_c0 | 30.0473897    | 30.9553371    | 28.7096559    | 24.4101517     | 25.6912208     | 23.1577928     | 7.694E-21 | -1.309317 | down      | PREDICTED: uncharacterized protein LOC105156064 [Sesamum indicum]                                      |
| c40848.graph_c0 | 313.954084    | 307.037415    | 302.055882    | 113.985391     | 128.403935     | 129.141743     | 5.843E-54 | -2.332307 | down      | Histone [Morus notabilis]                                                                              |
| c40850.graph_c0 | 22.2386991    | 21.9184914    | 21.103465     | 5.75232704     | 9.6834464      | 9.25516374     | 1.814E-25 | -2.428024 | down      | unnamed protein product [Coffea canephora]                                                             |
| c40853.graph_c0 | 20.3112139    | 24.2025065    | 22.896178     | 17.3801991     | 18.0947615     | 17.2423594     | 4.364E-18 | -1.373095 | down      | PREDICTED: protein ROOT INITIATION DEFECTIVE 3 [Sesamum indicum]                                       |
| c40855.graph_c0 | 0.6828788     | 0.54685008    | 0.96527892    | 8.55592988     | 9.73043864     | 10.0200712     | 1.145E-09 | 2.66383   | up        | PREDICTED: transcription factor BEE 1-like [Sesamum indicum]                                           |
| c40857.graph_c0 | 35.6586579    | 31.5272806    | 30.4781365    | 25.1807829     | 24.4841716     | 24.8303751     | 6.489E-19 | -1.406408 | down      | PREDICTED: vacuolar protein sorting-associated protein 32 homolog 2 [Sesamum indicum]                  |
| c40858.graph_c0 | 0.66286219    | 0.60320541    | 0.77436742    | 8.32734393     | 10.2333009     | 10.8674435     | 2.354E-11 | 2.826422  | up        | PREDICTED: GATA transcription factor 5-like [Sesamum indicum]                                          |
| c40868.graph_c0 | 13.1143528    | 12.1037819    | 12.5233896    | 13.4119033     | 12.916623      | 10.3558037     | 1.791E-06 | -1.055792 | down      | PREDICTED: FH protein interacting protein FIP2-like [Sesamum indicum]                                  |
| c40879.graph_c0 | 221.066044    | 222.780212    | 215.274793    | 93.9589712     | 70.1254664     | 71.1416114     | 3.757E-56 | -2.497805 | down      | PREDICTED: triacylglycerol lipase SDP1-like [Sesamum indicum]                                          |
| c40880.graph_c0 | 1.14507785    | 0.86741311    | 0.87492833    | 8.23978367     | 9.45395562     | 8.84117966     | 1.69E-22  | 2.182448  | up        | PREDICTED: chlorophyllide a oxygenase, chloroplastic-like [Sesamum indicum]                            |
| c40884.graph_c0 | 3.15467743    | 2.7187789     | 2.68813791    | 34.7512019     | 35.7115613     | 35.3328282     | 9.9E-63   | 2.610592  | up        | PREDICTED: bifunctional aspartokinase/homoserine dehydrogenase 1, chloroplastic-like [Sesamum indicum] |
| c40885.graph_c0 | 1.10372681    | 0.80841367    | 0.72646306    | 6.84496914     | 6.80476969     | 7.083647       | 2.348E-17 | 1.959885  | up        | PREDICTED: putative ATP-dependent RNA helicase C550.03c isoform X1 [Sesamum indicum]                   |

| #ID             | 0 h-1<br>FPKM | 0 h-2<br>FPKM | 0 h-3<br>FPKM | 48 h-1<br>FPKM | 48 h-2<br>FPKM | 48 h-3<br>FPKM | FDR       | log2FC    | regulated | nr_annotation                                                                                       |
|-----------------|---------------|---------------|---------------|----------------|----------------|----------------|-----------|-----------|-----------|-----------------------------------------------------------------------------------------------------|
| c40889.graph_c0 | 5.84827626    | 6.45382403    | 4.61913943    | 25.9929151     | 29.9864915     | 32.1084026     | 8.147E-16 | 1.362292  | up        | PREDICTED: putative E3 ubiquitin-protein ligase RF298 [Sesamum indicum]                             |
| c40890.graph_c0 | 23.7750733    | 24.3378795    | 25.5752491    | 13.2411018     | 12.1678095     | 10.9839463     | 2.12E-43  | -2.033432 | down      | PREDICTED: low molecular weight phosphotyrosine protein phosphatase [Sesamum indicum]               |
| c40893.graph_c0 | 60.2639037    | 49.9360852    | 59.1924473    | 338.984826     | 351.650301     | 359.086464     | 1.114E-27 | 1.612781  | up        | PREDICTED: 40S ribosomal protein S23-2 [Eucalyptus grandis]                                         |
| c40896.graph_c0 | 7.67777897    | 3.53935985    | 5.58222037    | 0              | 0              | 0              | 1.423E-15 | -Inf      | down      | -                                                                                                   |
| c40897.graph_c0 | 10.1755677    | 10.8046385    | 10.990467     | 0.97303864     | 0.95539086     | 0.95027261     | 2.789E-91 | -4.490881 | down      | PREDICTED: protein root UVB sensitive 6 [Sesamum indicum]                                           |
| c40898.graph_c0 | 2.06255478    | 2.47754414    | 1.32523228    | 0              | 0.20129891     | 0.22543346     | 1.23E-13  | -4.822335 | down      | PREDICTED: probable 2-oxoglutarate-dependent dioxygenase AOP1 [Sesamum indicum]                     |
| c40899.graph_c1 | 11.314966     | 9.25124955    | 11.3768578    | 60.5949654     | 54.9623742     | 53.3152042     | 8.515E-19 | 1.386297  | up        | hypothetical protein ARALYDRAFT_496862 [Arabidopsis lyrata subsp. lyrata]                           |
| c40901.graph_c0 | 4.90022557    | 5.26847555    | 5.13087575    | 19.8968327     | 24.2665931     | 24.944407      | 1.518E-06 | 1.153815  | up        | hypothetical protein MIMGU_mgv1a003594mg [Erythranthe guttata]                                      |
| c40903.graph_c0 | 23.852298     | 23.4216042    | 20.8138797    | 7.61031715     | 6.90141908     | 5.26484159     | 7.59E-75  | -2.795619 | down      | PREDICTED: serine/threonine-protein kinase/endoribonuclease IRE1a-like isoform X1 [Sesamum indicum] |
| c40904.graph_c0 | 4.47052244    | 6.29094061    | 4.49592913    | 22.3833525     | 21.0566537     | 22.5721155     | 1.892E-05 | 1.09778   | up        | hypothetical protein MIMGU_mgv1a017323mg [Erythranthe guttata]                                      |
| c40909.graph_c0 | 0.10059509    | 0.06713055    | 0.17235824    | 1.05031396     | 1.63629454     | 1.15446024     | 1.769E-05 | 2.466115  | up        | PREDICTED: pentatricopeptide repeat-containing protein At2g17140-like [Sesamum indicum]             |
| c40910.graph_c0 | 9.82537833    | 10.9788468    | 11.4514885    | 27.9447375     | 56.6435516     | 49.7769456     | 0.0085603 | 1.028596  | up        | PREDICTED: hippocampus abundant transcript-like protein 1 isoform X1 [Sesamum indicum]              |
| c40912.graph_c1 | 6.21329628    | 6.55964784    | 6.86153506    | 40.8736072     | 31.5990379     | 26.4213082     | 0.0001571 | 1.320865  | up        | hypothetical protein MIMGU_mgv1a013233mg [Erythranthe guttata]                                      |
| c40916.graph_c0 | 0.05186224    | 0             | 0.06664503    | 1.62448173     | 2.02463696     | 2.4657746      | 7.93E-10  | 4.657208  | up        | PREDICTED: uncharacterized protein LOC105162032 [Sesamum indicum]                                   |
| c40921.graph_c0 | 50.1843338    | 46.869116     | 45.6822535    | 35.2555716     | 38.5071117     | 33.8830536     | 1.912E-22 | -1.424463 | down      | PREDICTED: prostaglandin E synthase 2-like [Sesamum indicum]                                        |
| c40925.graph_c0 | 3.74658171    | 3.79200372    | 2.62123095    | 0.95877651     | 1.34073384     | 0.85311357     | 3.144E-12 | -2.705429 | down      | PREDICTED: uncharacterized protein LOC105166274 [Sesamum indicum]                                   |
| c40929.graph_c0 | 20132.0579    | 19213.0311    | 21254.6743    | 503.03885      | 459.389858     | 381.236989     | 7.827E-81 | -6.510022 | down      | --                                                                                                  |
| c40931.graph_c0 | 4.36942192    | 5.84498358    | 4.3898154     | 3.98880196     | 4.14811711     | 4.36325145     | 1.867E-05 | -1.241863 | down      | PREDICTED: cyclin-dependent kinase inhibitor 1 [Sesamum indicum]                                    |
| c40935.graph_c0 | 117.450405    | 118.36284     | 110.369065    | 53.1261363     | 48.9186803     | 45.5084735     | 8.313E-55 | -2.244812 | down      | hypothetical protein M569_02358 [Genlisea aurea]                                                    |
| c40938.graph_c0 | 1.73324258    | 1.80437728    | 1.3363712     | 20.055508      | 20.9080607     | 18.9250798     | 9.536E-40 | 2.604479  | up        | PREDICTED: endoglucanase 10-like [Sesamum indicum]                                                  |
| c40939.graph_c0 | 0             | 0             | 0.05648198    | 9.23236409     | 8.32206418     | 7.92665987     | 3.726E-29 | 7.770015  | up        | PREDICTED: uncharacterized protein LOC105156631 [Sesamum indicum]                                   |

| #ID             | 0 h-1<br>FPKM | 0 h-2<br>FPKM | 0 h-3<br>FPKM | 48 h-1<br>FPKM | 48 h-2<br>FPKM | 48 h-3<br>FPKM | FDR       | log2FC    | regulated | nr_annotation                                                                                          |
|-----------------|---------------|---------------|---------------|----------------|----------------|----------------|-----------|-----------|-----------|--------------------------------------------------------------------------------------------------------|
| c40941.graph_c0 | 2.07162152    | 1.67980956    | 1.6061927     | 9.09475686     | 7.11596602     | 6.01479439     | 0.0015682 | 1.043459  | up        | PREDICTED: protein PHYLLLO, chloroplastic [Sesamum indicum]                                            |
| c40942.graph_c0 | 0.95012202    | 0.95107342    | 0.70686255    | 4.37657188     | 9.12648032     | 11.1088529     | 0.0008333 | 2.210792  | up        | PREDICTED: serine carboxypeptidase-like 27 [Sesamum indicum]                                           |
| c40943.graph_c0 | 7.04410164    | 7.0123059     | 4.8127445     | 23.4193568     | 32.8968822     | 31.7507267     | 6.968E-08 | 1.203048  | up        | PREDICTED: uncharacterized protein LOC105157708 [Sesamum indicum]                                      |
| c40944.graph_c1 | 6.26101104    | 6.24544328    | 6.2514958     | 5.30580369     | 6.74928501     | 6.97431124     | 2.45E-07  | -1.001378 | down      | unnamed protein product [Vitis vinifera]                                                               |
| c40949.graph_c0 | 65.7595936    | 65.0380562    | 77.2258523    | 39.2768643     | 30.8613435     | 30.4346973     | 1.791E-25 | -2.062805 | down      | PREDICTED: malate synthase [Tarenaya hassleriana]                                                      |
| c40949.graph_c1 | 121.071073    | 130.770536    | 139.118586    | 70.7770867     | 51.517218      | 45.7012902     | 9.714E-41 | -2.229776 | down      | PREDICTED: malate synthase [Tarenaya hassleriana]                                                      |
| c40952.graph_c0 | 8.95382337    | 6.24679252    | 8.13556794    | 81.6552442     | 100.979981     | 117.584657     | 7.955E-24 | 2.662721  | up        | putative nitrilase-associated protein [Plantago major]                                                 |
| c40953.graph_c0 | 3.67825963    | 3.13462702    | 2.29948018    | 0.59530385     | 1.21279278     | 1.01864959     | 2.391E-10 | -2.712983 | down      | -                                                                                                      |
| c40954.graph_c0 | 28.0425268    | 30.1028683    | 29.7580348    | 148.461304     | 137.338516     | 148.846507     | 1.958E-19 | 1.288943  | up        | PREDICTED: putative 4-hydroxy-4-methyl-2-oxoglutarate aldolase 3 [Sesamum indicum]                     |
| c40955.graph_c0 | 5.9564231     | 5.48003711    | 5.72777923    | 74.9498732     | 80.2624973     | 79.5275966     | 4.247E-81 | 2.75504   | up        | PREDICTED: probable alanine--tRNA ligase, chloroplastic isoform X2 [Sesamum indicum]                   |
| c40956.graph_c0 | 1.21421697    | 0.83161193    | 1.02652426    | 12.805208      | 15.1248255     | 18.2042022     | 6.998E-25 | 2.887073  | up        | PREDICTED: uncharacterized protein LOC105174334 [Sesamum indicum]                                      |
| c40959.graph_c0 | 52.1536428    | 52.0088636    | 50.2266864    | 43.9134534     | 38.0311885     | 37.1379766     | 1.448E-22 | -1.388577 | down      | hypothetical protein MIMGU_mgv1a008968mg [Erythranthe guttata]                                         |
| c40960.graph_c0 | 13.5099371    | 12.088322     | 12.0462722    | 0.60961152     | 0.32290474     | 0.09040478     | 1.498E-73 | -6.196804 | down      | PREDICTED: transcription factor bHLH113-like [Sesamum indicum]                                         |
| c40970.graph_c0 | 0.13931366    | 0.13945316    | 0.04475589    | 9.94672412     | 13.5285953     | 15.9880638     | 3.124E-29 | 5.915963  | up        | PREDICTED: glycerophosphodiester phosphodiesterase GDPDL3-like [Sesamum indicum]                       |
| c40971.graph_c0 | 1.43337841    | 1.34322987    | 2.11628069    | 33.8559284     | 29.050175      | 27.6748176     | 1.653E-33 | 3.191689  | up        | PREDICTED: uncharacterized protein LOC105164832 [Sesamum indicum]                                      |
| c40977.graph_c0 | 0.11641632    | 0.11653289    | 0.14959958    | 4.29001217     | 3.74941686     | 4.77153379     | 1.09E-08  | 4.045938  | up        | class I KNOX homeobox transcription factor STM-like 2 [Prunus persica]                                 |
| c40979.graph_c0 | 0.88026104    | 0.68088284    | 1.07975346    | 16.8825855     | 23.8988034     | 25.5833581     | 4.93E-25  | 3.623789  | up        | PREDICTED: uncharacterized protein LOC105165458 [Sesamum indicum]                                      |
| c40980.graph_c0 | 12.0642313    | 12.279275     | 11.8769596    | 6.66238754     | 8.55863952     | 7.35478717     | 8.851E-28 | -1.702855 | down      | PREDICTED: putative pentatricopeptide repeat-containing protein At5g65820 isoform X2 [Sesamum indicum] |
| c40984.graph_c1 | 21.3471099    | 20.4042601    | 20.5239986    | 8.50204653     | 9.43145445     | 9.09336682     | 1.668E-42 | -2.223135 | down      | PREDICTED: uncharacterized protein LOC105159405 [Sesamum indicum]                                      |
| c40986.graph_c0 | 6.38586465    | 6.72996338    | 7.18419858    | 27.1953469     | 27.3755434     | 29.0379073     | 5.57E-11  | 1.023079  | up        | PREDICTED: glutamate--tRNA ligase, chloroplastic/mitochondrial [Sesamum indicum]                       |
| c40989.graph_c0 | 2.48932088    | 1.86886017    | 2.13258393    | 17.9643773     | 22.844044      | 25.3939664     | 3.526E-22 | 2.328502  | up        | PREDICTED: GDSL esterase/lipase At4g10955-like [Sesamum indicum]                                       |

| #ID             | 0 h-1<br>FPKM | 0 h-2<br>FPKM | 0 h-3<br>FPKM | 48 h-1<br>FPKM | 48 h-2<br>FPKM | 48 h-3<br>FPKM | FDR       | log2FC    | regulated | nr_annotation                                                                                |
|-----------------|---------------|---------------|---------------|----------------|----------------|----------------|-----------|-----------|-----------|----------------------------------------------------------------------------------------------|
| c40992.graph_c0 | 0             | 0             | 0             | 2.23100536     | 4.5754542      | 1.98513515     | 4.42E-08  | Inf       | up        | PREDICTED: hippocampus abundant transcript 1 protein-like [Sesamum indicum]                  |
| c40996.graph_c0 | 69.4210047    | 75.6683288    | 65.3658601    | 21.4028868     | 23.5561602     | 20.9453536     | 8.263E-77 | -2.692482 | down      | PREDICTED: probable methionine--tRNA ligase [Sesamum indicum]                                |
| c40998.graph_c0 | 15.0762415    | 15.0650006    | 14.3695743    | 12.5802855     | 14.0206142     | 13.3291079     | 1.393E-13 | -1.175276 | down      | PREDICTED: protein FAM63A-like [Sesamum indicum]                                             |
| c40999.graph_c0 | 0.15939825    | 0.10637191    | 0.17069422    | 1.41953127     | 3.50027362     | 2.28662916     | 9.267E-05 | 3.012729  | up        | PREDICTED: tyrosine-sulfated glycopeptide receptor 1 [Sesamum indicum]                       |
| c41000.graph_c0 | 3.27286716    | 3.53209323    | 4.20576388    | 25.9588041     | 29.6463193     | 29.8471276     | 1.627E-30 | 1.933724  | up        | PREDICTED: ATP-dependent zinc metalloprotease FTSH 2, chloroplastic [Sesamum indicum]        |
| c41003.graph_c0 | 2001.21231    | 1906.87187    | 2046.74872    | 19.6697342     | 16.5792004     | 13.3348657     | 8.64E-248 | -7.920755 | down      | hypothetical protein M569_01497, partial [Genlisea aurea]                                    |
| c41009.graph_c0 | 2.08872836    | 2.34316024    | 2.68409863    | 9.621364       | 10.860464      | 13.1072349     | 3.335E-06 | 1.215407  | up        | PREDICTED: uncharacterized protein LOC105156446 [Sesamum indicum]                            |
| c41011.graph_c0 | 15.9990072    | 14.413525     | 13.3372244    | 5.93352475     | 8.48789936     | 10.8282542     | 1.234E-21 | -1.816919 | down      | PREDICTED: xyloglucan galactosyltransferase KATAMARI1 homolog [Sesamum indicum]              |
| c41012.graph_c0 | 3.32648265    | 3.48468867    | 2.38585781    | 17.8885528     | 16.8367244     | 14.0146813     | 3.584E-05 | 1.394612  | up        | PREDICTED: UMP-CMP kinase isoform A2 [Sesamum indicum]                                       |
| c41013.graph_c0 | 27.2127615    | 30.0006168    | 27.7641192    | 9.27848988     | 10.424257      | 10.3542783     | 1.015E-67 | -2.518789 | down      | PREDICTED: uncharacterized protein LOC105172362 [Sesamum indicum]                            |
| c41014.graph_c0 | 16.5728759    | 15.0507375    | 16.9139816    | 237.871236     | 243.97875      | 222.760973     | 2.209E-85 | 2.84184   | up        | PREDICTED: short-chain dehydrogenase TIC 32, chloroplastic-like [Sesamum indicum]            |
| c41017.graph_c0 | 0.10299957    | 0.13747028    | 0.22059754    | 4.39656631     | 4.1885152      | 4.55935395     | 9.689E-14 | 3.808706  | up        | PREDICTED: protein PINS1 isoform A1 [Sesamum indicum]                                        |
| c41019.graph_c0 | 0.75708509    | 0.80836607    | 0.64858954    | 4.6498411      | 4.28557025     | 4.09602664     | 0.0009902 | 1.543672  | up        | PREDICTED: carbon catabolite repressor protein 4 homolog 4-like isoform X1 [Sesamum indicum] |
| c41020.graph_c0 | 33.6641047    | 35.5006696    | 33.4591264    | 595.198323     | 613.76568      | 766.208655     | 8.623E-48 | 3.247054  | up        | PREDICTED: stachyose synthase [Sesamum indicum]                                              |
| c41021.graph_c0 | 165.918449    | 174.937366    | 170.78556     | 47.236062      | 66.7211733     | 74.3648343     | 8.41E-59  | -2.466436 | down      | PREDICTED: glycosyltransferase 6 [Sesamum indicum]                                           |
| c41024.graph_c0 | 6.13656721    | 5.25154139    | 5.43420897    | 56.1239681     | 59.5806652     | 58.9569395     | 5.754E-51 | 2.358388  | up        | PREDICTED: glycerol-3-phosphate acyltransferase, chloroplastic [Sesamum indicum]             |
| c41025.graph_c0 | 2.77399294    | 2.61246472    | 2.53114137    | 11.5228072     | 13.1201404     | 11.9617454     | 5.298E-11 | 1.190444  | up        | PREDICTED: uncharacterized protein LOC105177410 [Sesamum indicum]                            |
| c41027.graph_c0 | 7.8006417     | 9.98193974    | 7.49226467    | 4.81566903     | 5.53329272     | 5.53747817     | 8.977E-13 | -1.688552 | down      | PREDICTED: E3 ubiquitin-protein ligase At3g02290 [Sesamum indicum]                           |
| c41028.graph_c0 | 1.64702555    | 1.56057767    | 1.26020196    | 9.1388326      | 8.52805079     | 9.1004714      | 3.723E-16 | 1.568869  | up        | PREDICTED: DNA-directed RNA polymerase V subunit 1 [Sesamum indicum]                         |
| c41038.graph_c0 | 2.44598264    | 1.65629218    | 1.66403887    | 14.6470919     | 16.6402073     | 12.67906       | 8.467E-08 | 1.915579  | up        | shikimate kinase, partial [Ipomoea purpurea]                                                 |
| c41039.graph_c0 | 58.8712785    | 61.5639824    | 63.5645213    | 33.8748139     | 34.6665102     | 37.4748049     | 3.414E-33 | -1.814552 | down      | hypothetical protein MIMGU_mgv1a0073611mg, partial [Erythranthe guttata]                     |
| c41040.graph_c0 | 0.01929667    | 0.01931599    | 0.07439095    | 14.7018692     | 16.2716667     | 16.7514525     | 3.62E-109 | 7.686768  | up        | PREDICTED: glucomannan 4-beta-mannosyltransferase 9-like [Nicotiana tomentosiformis]         |

| #ID             | 0 h-1<br>FPKM | 0 h-2<br>FPKM | 0 h-3<br>FPKM | 48 h-1<br>FPKM | 48 h-2<br>FPKM | 48 h-3<br>FPKM | FDR       | log2FC    | regulated | nr_annotation                                                                                          |
|-----------------|---------------|---------------|---------------|----------------|----------------|----------------|-----------|-----------|-----------|--------------------------------------------------------------------------------------------------------|
| c41042.graph_c0 | 7.67215682    | 7.38925081    | 5.54237096    | 26.1328348     | 31.5701233     | 36.5790278     | 1.684E-08 | 1.175292  | up        | PREDICTED: MLO-like protein 1 [Sesamum indicum]                                                        |
| c41044.graph_c0 | 2.03609404    | 2.44575945    | 1.15124304    | 12.1550715     | 16.2947468     | 16.6906011     | 1.783E-07 | 1.985464  | up        | PREDICTED: phytochrome B [Sesamum indicum]                                                             |
| c41044.graph_c1 | 1.18362858    | 1.51586472    | 0.87234373    | 8.17826888     | 10.345697      | 12.2424394     | 9.027E-13 | 2.087604  | up        | PREDICTED: phytochrome B [Sesamum indicum]                                                             |
| c41045.graph_c0 | 25.6669068    | 28.094442     | 26.3998969    | 16.3368161     | 17.3923418     | 17.8026044     | 4.899E-31 | -1.656182 | down      | PREDICTED: probable pre-mRNA-splicing factor ATP-dependent RNA helicase [Sesamum indicum]              |
| c41055.graph_c0 | 0             | 0.2347584     | 0             | 6.26569362     | 8.69773173     | 6.7286613      | 4.704E-10 | 5.519709  | up        | calmodulin, partial [Malus domestica]                                                                  |
| c41055.graph_c2 | 3.07661226    | 3.8151421     | 2.83240733    | 2.79207177     | 3.04749365     | 3.38777546     | 0.0026568 | -1.093836 | down      | hypothetical protein VITISV_041204 [Vitis vinifera]                                                    |
| c41058.graph_c0 | 0.55793016    | 0.40617371    | 0.0651784     | 4.67274233     | 6.83128139     | 7.27611155     | 1.934E-10 | 3.178875  | up        | PREDICTED: axial regulator YABBY 5 [Beta vulgaris subsp. vulgaris]                                     |
| c41061.graph_c0 | 12.5529139    | 12.7240388    | 13.7902166    | 6.6760727      | 7.53625931     | 7.04399708     | 6.819E-32 | -1.898283 | down      | PREDICTED: pentatricopeptide repeat-containing protein At2g17670 [Sesamum indicum]                     |
| c41070.graph_c1 | 41.580037     | 39.7417026    | 43.6099361    | 9.05347109     | 9.56974138     | 9.61316414     | 2.27E-100 | -3.164731 | down      | probable tocopherol cyclase, chloroplastic [Sesamum indicum]                                           |
| c41073.graph_c0 | 32.1156884    | 28.8266129    | 28.3149991    | 20.3386593     | 25.9469452     | 28.5580356     | 1.056E-16 | -1.27572  | down      | PREDICTED: uncharacterized protein LOC105174078 [Sesamum indicum]                                      |
| c41074.graph_c0 | 37.9708001    | 35.4263411    | 35.6179063    | 32.0559224     | 26.5993488     | 24.4561755     | 3.124E-18 | -1.40397  | down      | PREDICTED: uncharacterized protein LOC105177909 [Sesamum indicum]                                      |
| c41079.graph_c0 | 0.33164247    | 0.96272622    | 0.59664319    | 9.92974695     | 11.9435227     | 10.4393993     | 2.341E-21 | 3.074201  | up        | PREDICTED: HIPL1 protein-like [Sesamum indicum]                                                        |
| c41083.graph_c0 | 0.03722506    | 0             | 0             | 15.5009567     | 14.4595373     | 20.6584723     | 7.373E-43 | 9.411427  | up        | hypothetical protein MIMGU_mgv1a013647mg [Erythranthe guttata]                                         |
| c41088.graph_c0 | 6.69602699    | 7.99171898    | 6.50865291    | 75.6075496     | 94.4659021     | 84.6217149     | 8.991E-60 | 2.567055  | up        | PREDICTED: transcription factor ILKS-like [Sesamum indicum]                                            |
| c41089.graph_c0 | 8.20251258    | 7.60456516    | 6.54363215    | 7.37918346     | 8.11285132     | 6.92696768     | 1.451E-07 | -1.011562 | down      | PREDICTED: uncharacterized protein LOC105176739 isoform X2 [Sesamum indicum]                           |
| c41090.graph_c0 | 24.2619082    | 21.2504275    | 22.7576597    | 17.5225917     | 22.4729972     | 19.028992      | 5.308E-15 | -1.230669 | down      | PREDICTED: developmentally-regulated G-protein 3 [Sesamum indicum]                                     |
| c41093.graph_c0 | 2.29088888    | 3.16374301    | 2.53501028    | 17.0600064     | 17.8452841     | 17.8750608     | 1.119E-20 | 1.705775  | up        | PREDICTED: uncharacterized protein LOC105174509 [Sesamum indicum]                                      |
| c41098.graph_c0 | 6.36257991    | 5.58061185    | 7.16413337    | 0.45823768     | 0.5865821      | 0.98536473     | 1.188E-48 | -4.261985 | down      | -                                                                                                      |
| c41099.graph_c0 | 4.14188601    | 0.99504804    | 1.9160955     | 0              | 0              | 0              | 4.977E-06 | -Inf      | down      | PREDICTED: LOW QUALITY PROTEIN: oryzain gamma chain-like [Phoenix dactylifera]                         |
| c41100.graph_c0 | 501.726751    | 516.389476    | 501.810512    | 238.389226     | 171.083109     | 147.481895     | 6.614E-55 | -2.457675 | down      | PREDICTED: SNF1-related protein kinase catalytic subunit alpha KIN10-like isoform X2 [Sesamum indicum] |
| c41100.graph_c1 | 708.821262    | 714.438608    | 702.827095    | 287.734323     | 202.323271     | 187.026322     | 9.271E-60 | -2.660237 | down      | PREDICTED: uncharacterized protein LOC105162997 [Sesamum indicum]                                      |
| c41103.graph_c1 | 4.4612299     | 4.46569715    | 3.25679817    | 20.0061476     | 22.4647163     | 25.7842094     | 1.663E-18 | 1.468585  | up        | PREDICTED: translation initiation factor IF-2, chloroplastic isoform X2 [Sesamum indicum]              |
| c41104.graph_c0 | 16.8621193    | 18.4314762    | 18.4457799    | 16.4464891     | 16.2636706     | 13.3085428     | 1.497E-14 | -1.240074 | down      | PREDICTED: UPR0490 protein At4g34320 [Sesamum indicum]                                                 |



| #ID             | 0 h-1<br>FPKM | 0 h-2<br>FPKM | 0 h-3<br>FPKM | 48 h-1<br>FPKM | 48 h-2<br>FPKM | 48 h-3<br>FPKM | FDR       | log2FC    | regulated | nr_annotation                                                                                     |
|-----------------|---------------|---------------|---------------|----------------|----------------|----------------|-----------|-----------|-----------|---------------------------------------------------------------------------------------------------|
| c41105.graph_c0 | 41.6796703    | 39.1225199    | 34.6740104    | 18.9213878     | 18.7327206     | 18.2803204     | 2.629E-41 | -2.061083 | down      | PREDICTED: probable BOI-related E3 ubiquitin-protein ligase 2 [Sesamum indicum]                   |
| c41105.graph_c1 | 0.28385933    | 0.5276952     | 0.10422014    | 4.52038246     | 3.99726038     | 4.4543473      | 2.129E-08 | 2.817942  | up        | PREDICTED: B3 domain-containing protein At3g19184-like isoform X1 [Sesamum indicum]               |
| c41107.graph_c0 | 129.647597    | 121.413229    | 135.118396    | 15.3958593     | 14.2067143     | 12.3974145     | 9.58E-165 | -4.216288 | down      | PREDICTED: isopentenyl-diphosphate Delta-isomerase I [Sesamum indicum]                            |
| c41111.graph_c0 | 0             | 0             | 0             | 0.78719681     | 1.02852546     | 0.79383538     | 1.947E-11 | Inf       | up        | -                                                                                                 |
| c41118.graph_c0 | 25.5906067    | 24.277726     | 25.4784241    | 20.772135      | 21.5780474     | 19.2010711     | 1.457E-19 | -1.309188 | down      | hypothetical protein MIMGU_mgv1a002787mg [Erythranthe guttata]                                    |
| c41123.graph_c0 | 31.3594113    | 29.6833629    | 31.0244672    | 139.012073     | 139.262824     | 129.123803     | 4.821E-15 | 1.128719  | up        | PREDICTED: NADH dehydrogenase [ubiquinone] iron-sulfur protein 8, mitochondrial [Sesamum indicum] |
| c41123.graph_c1 | 18.6500566    | 19.6356382    | 14.1313827    | 8.21433399     | 6.4540507      | 7.49179161     | 1.437E-20 | -2.252902 | down      | hypothetical protein MIMGU_mgv1a010537mg [Erythranthe guttata]                                    |
| c41124.graph_c0 | 1.83300727    | 1.49080974    | 1.71754254    | 11.4338105     | 16.7342104     | 14.7753948     | 2.084E-14 | 2.066963  | up        | hypothetical protein MIMGU_mgv1a016809mg [Erythranthe guttata]                                    |
| c41125.graph_c0 | 15.7388567    | 14.1114973    | 14.43465      | 245.219222     | 260.56534      | 266.371532     | 1.979E-98 | 3.105794  | up        | PREDICTED: isocitrate dehydrogenase [NADP] [Sesamum indicum]                                      |
| c41126.graph_c0 | 30.0419517    | 30.7452886    | 26.6010247    | 118.210775     | 121.984359     | 127.757507     | 6.318E-14 | 1.057018  | up        | hypothetical protein MIMGU_mgv1a006861mg [Erythranthe guttata]                                    |
| c41129.graph_c0 | 1.86144977    | 1.77664797    | 1.39071898    | 11.246481      | 10.9425506     | 10.4328831     | 1.052E-07 | 1.683919  | up        | hypothetical protein MIMGU_mgv1a010701mg [Erythranthe guttata]                                    |
| c41131.graph_c0 | 13.9506951    | 15.3581019    | 13.2995681    | 11.5977283     | 9.68734349     | 9.82345484     | 2.442E-18 | -1.466885 | down      | PREDICTED: lysM domain receptor-like kinase 4 [Sesamum indicum]                                   |
| c41133.graph_c0 | 5.58721534    | 6.03580494    | 5.11826821    | 21.9142782     | 25.0511663     | 28.1151154     | 2.391E-07 | 1.14546   | up        | PREDICTED: dolichol-phosphate mannosyltransferase subunit 1 isoform X1 [Sesamum indicum]          |
| c41136.graph_c1 | 146.777213    | 135.821772    | 148.843321    | 5.44554121     | 6.74117554     | 8.27530666     | 2.31E-232 | -5.421455 | down      | PREDICTED: protein TRANSPARENT TESTA 12-like [Nicotiana tomentosiformis]                          |
| c41136.graph_c2 | 69.5671798    | 64.7003918    | 77.7361568    | 2.96824325     | 3.27284049     | 4.04253825     | 1.09E-109 | -5.388084 | down      | PREDICTED: protein TRANSPARENT TESTA 12-like [Sesamum indicum]                                    |
| c41137.graph_c0 | 2.12897569    | 2.04042211    | 2.34775876    | 12.2688782     | 13.7194659     | 12.3772948     | 4.176E-18 | 1.537441  | up        | PREDICTED: ABC transporter G family member 29-like [Vitis vinifera]                               |
| c41141.graph_c0 | 0.06856178    | 0             | 0             | 2.02123478     | 1.67285403     | 2.15443222     | 4.043E-14 | 5.419966  | up        | PREDICTED: LOW QUALITY PROTEIN: uncharacterized protein LOC105157816 [Sesamum indicum]            |
| c41142.graph_c0 | 0             | 0             | 0.09334058    | 1.40526406     | 3.96988501     | 3.45347332     | 6.708E-06 | 5.498064  | up        | gibberelin 20-oxidase [Lactuca sativa]                                                            |
| c41143.graph_c0 | 17.8342171    | 19.3024231    | 15.9629684    | 10.4233612     | 11.1878542     | 11.5452727     | 1.975E-29 | -1.696939 | down      | PREDICTED: formin-like protein 5 [Sesamum indicum]                                                |
| c41144.graph_c0 | 48.3231579    | 52.4413695    | 46.3143668    | 282.717486     | 294.958175     | 317.245128     | 5.03E-29  | 1.587154  | up        | hypothetical protein MIMGU_mgv1a008949mg [Erythranthe guttata]                                    |

| #ID             | 0 h-1<br>FPKM | 0 h-2<br>FPKM | 0 h-3<br>FPKM | 48 h-1<br>FPKM | 48 h-2<br>FPKM | 48 h-3<br>FPKM | FDR       | log2FC    | regulated | nr_annotation                                                                                    |
|-----------------|---------------|---------------|---------------|----------------|----------------|----------------|-----------|-----------|-----------|--------------------------------------------------------------------------------------------------|
| c41146.graph_c0 | 0             | 0             | 0             | 3.51981351     | 3.41808098     | 5.35034437     | 1.207E-11 | Inf       | up        | Brassinosteroid signaling positive regulator family protein [Theobroma cacao]                    |
| c41146.graph_c2 | 0             | 0             | 0             | 2.92783496     | 2.67872893     | 3.55250447     | 1.128E-10 | Inf       | up        | PREDICTED: protein BRASSINAZOLE-RESISTANT 1 isoform X2 [Sesamum indicum]                         |
| c41147.graph_c0 | 0             | 0             | 0             | 7.40939437     | 10.2832634     | 10.0170199     | 6.547E-25 | Inf       | up        | hypothetical protein MIMGU_mgv1a010461mg [Erythranthe guttata]                                   |
| c41152.graph_c0 | 16.428353     | 15.0418203    | 14.7629958    | 14.4363378     | 16.3475037     | 14.3144848     | 3.861E-12 | -1.053854 | down      | PREDICTED: AP2-associated protein kinase 1 isoform X4 [Sesamum indicum]                          |
| c41154.graph_c1 | 0             | 0.11384974    | 0.43846521    | 2.72430297     | 3.77408978     | 4.0090362      | 2.661E-07 | 3.202566  | up        | -                                                                                                |
| c41156.graph_c0 | 2.22115306    | 2.91509456    | 3.04455426    | 10.5951369     | 12.7657924     | 12.4620886     | 0.0001462 | 1.107514  | up        | PREDICTED: uncharacterized protein LOC105177301 [Sesamum indicum]                                |
| c41157.graph_c1 | 6.0032179     | 4.55872561    | 4.87690227    | 29.2420196     | 34.9516872     | 40.3300285     | 1.059E-14 | 1.738699  | up        | PREDICTED: 4-hydroxy-3-methylbut-2-en-1-yl diphosphate synthase, chloroplastic [Sesamum indicum] |
| c41163.graph_c0 | 0.33364585    | 0.61229656    | 0.28583208    | 41.9056379     | 59.9155403     | 57.8000045     | 3.142E-56 | 5.997997  | up        | -                                                                                                |
| c41164.graph_c1 | 47.8637264    | 48.9719402    | 46.4491061    | 1109.08848     | 959.791277     | 1144.23693     | 2.363E-69 | 3.471384  | up        | PREDICTED: CASP-like protein 2A1 [Sesamum indicum]                                               |
| c41165.graph_c0 | 1.03587911    | 0.95050668    | 0.49917962    | 0.15905323     | 0.75823926     | 0.45995498     | 0.0006573 | -1.88293  | down      | -                                                                                                |
| c41167.graph_c0 | 2.66078802    | 2.43351406    | 2.58286248    | 14.1257875     | 13.7875713     | 13.0711748     | 6.067E-14 | 1.399896  | up        | PREDICTED: uncharacterized protein LOC105165931 isoform X2 [Sesamum indicum]                     |
| c41168.graph_c0 | 6.02115991    | 5.01326952    | 5.53190008    | 24.5212273     | 26.471549      | 26.1549315     | 1.382E-12 | 1.200839  | up        | hypothetical protein MIMGU_mgv1a003607mg [Erythranthe guttata]                                   |
| c41176.graph_c0 | 11.4634383    | 10.9321847    | 12.0933318    | 52.8400141     | 53.4451783     | 62.8582843     | 4.059E-17 | 1.274344  | up        | PREDICTED: uroporphyrinogen decarboxylase, chloroplastic-like [Fragaria vesca subsp. vesca]      |
| c41178.graph_c0 | 15.3907975    | 16.7594571    | 13.7642686    | 8.23915242     | 7.61196186     | 8.3540992      | 1.138E-11 | -1.938742 | down      | PREDICTED: probable E3 ubiquitin-protein ligase ARI2 isoform X1 [Sesamum indicum]                |
| c41183.graph_c0 | 0             | 0             | 0             | 2.48152076     | 4.85329911     | 2.71759047     | 1.433E-07 | Inf       | up        | hypothetical protein VOLCADRAFT_105423 [Volvox carteri f. nagariensis]                           |
| c41190.graph_c0 | 0.39633158    | 0.34005296    | 0.36378698    | 9.25856491     | 8.26109784     | 9.56097109     | 1.873E-25 | 3.605448  | up        | PREDICTED: pectinesterase-like [Sesamum indicum]                                                 |
| c41191.graph_c0 | 8.93482682    | 7.78035598    | 6.34755465    | 38.4129445     | 31.5483734     | 30.4877331     | 3.339E-06 | 1.112732  | up        | PREDICTED: uncharacterized protein DDB_G0287625 [Sesamum indicum]                                |
| c41192.graph_c1 | 66.3198153    | 65.3430125    | 71.1008223    | 28.1924273     | 31.3459112     | 36.1137316     | 4.724E-39 | -2.105257 | down      | hypothetical protein MIMGU_mgv1a014126mg [Erythranthe guttata]                                   |
| c41194.graph_c0 | 12.9402526    | 14.1307749    | 11.2117999    | 2.98035119     | 2.43974781     | 2.20991547     | 8.413E-42 | -3.337692 | down      | unnamed protein product [Coffea canephora]                                                       |
| c41196.graph_c0 | 362.369009    | 351.300466    | 367.666676    | 47.8527482     | 57.0459379     | 57.577395      | 1.99E-136 | -3.755583 | down      | -                                                                                                |
| c41198.graph_c0 | 67.9110422    | 67.3090005    | 62.6361745    | 14.5758613     | 13.837832      | 12.520569      | 1.655E-97 | -3.287849 | down      | -                                                                                                |
| c41199.graph_c0 | 0.02624224    | 0.05253704    | 0.13488929    | 2.94948018     | 2.35626826     | 2.53838285     | 3.919E-13 | 4.169446  | up        | PREDICTED: U-box domain-containing protein 13-like [Sesamum indicum]                             |

| #ID             | 0 h-1<br>FPKM | 0 h-2<br>FPKM | 0 h-3<br>FPKM | 48 h-1<br>FPKM | 48 h-2<br>FPKM | 48 h-3<br>FPKM | FDR       | log2FC    | regulated | nr_annotation                                                                              |
|-----------------|---------------|---------------|---------------|----------------|----------------|----------------|-----------|-----------|-----------|--------------------------------------------------------------------------------------------|
| c41200.graph_c0 | 0.14849897    | 0.2147133     | 0.10601503    | 1.04885318     | 1.48151036     | 1.8394754      | 8.591E-06 | 2.198737  | up        | PREDICTED: uncharacterized protein LOC105159953 isoform X1 [Sesamum indicum]               |
| c41201.graph_c0 | 1.7541774     | 1.47271879    | 1.81789307    | 23.8238911     | 31.7552543     | 27.7851525     | 2.148E-30 | 3.02365   | up        | cytochrome P450 98A3 [Sesamum indicum]                                                     |
| c41202.graph_c0 | 162.028601    | 148.498406    | 157.668906    | 43.0361708     | 42.5185793     | 32.2425574     | 7.339E-94 | -3.005966 | down      | PREDICTED: GATA transcription factor 15-like [Sesamum indicum]                             |
| c41210.graph_c0 | 1.22673056    | 0.95934292    | 0.83746108    | 125.234104     | 111.045007     | 98.4540858     | 1.681E-65 | 5.779754  | up        | PREDICTED: probable beta-1,3-galactosyltransferase 6 [Sesamum indicum]                     |
| c41219.graph_c0 | 5.21990891    | 4.70262227    | 3.73719707    | 66.4318025     | 66.0097525     | 62.9616722     | 5.295E-45 | 2.824651  | up        | hypothetical protein MIMGU_mgv1a008823mg [Erythranthe guttata]                             |
| c41223.graph_c0 | 15.4207032    | 16.2877941    | 15.7163078    | 134.292793     | 142.61291      | 136.405585     | 1.217E-49 | 2.105287  | up        | PREDICTED: 6-phosphogluconate dehydrogenase, decarboxylating 3 [Sesamum indicum]           |
| c41223.graph_c1 | 1.3510688     | 1.35242169    | 0.43404422    | 21.1597759     | 15.1639114     | 19.3816014     | 2.34E-07  | 3.146816  | up        | -                                                                                          |
| c41225.graph_c0 | 41.6736771    | 44.4763545    | 40.9214517    | 26.7500156     | 27.212693      | 23.8020031     | 2.848E-30 | -1.724741 | down      | PREDICTED: 1-aminocyclopropane-1-carboxylate oxidase homolog 1-like [Solanum lycopersicum] |
| c41226.graph_c0 | 0.0245998     | 0.12312216    | 0.09483515    | 2.0170016      | 2.1847859      | 3.60959714     | 8.563E-09 | 3.981502  | up        | PREDICTED: alpha-mannosidase-like [Sesamum indicum]                                        |
| c41230.graph_c0 | 2.33233694    | 1.92045634    | 1.98198318    | 0.24259526     | 0.44057189     | 0.61674231     | 2.68E-12  | -3.290338 | down      | hypothetical protein MIMGU_mgv1a002463mg [Erythranthe guttata]                             |
| c41232.graph_c0 | 55.8667625    | 56.227385     | 51.5942266    | 296.649007     | 280.236652     | 227.460325     | 1.421E-09 | 1.283045  | up        | PREDICTED: uncharacterized protein LOC105163662 isoform X2 [Sesamum indicum]               |
| c41239.graph_c0 | 0             | 0             | 0             | 9.0744898      | 7.30125691     | 7.05234716     | 1.223E-14 | Inf       | up        | --                                                                                         |
| c41241.graph_c0 | 18.8661384    | 18.7323209    | 16.6634835    | 8.62008619     | 11.1171396     | 10.0044794     | 1.889E-33 | -1.887586 | down      | PREDICTED: uncharacterized protein LOC105172605 [Sesamum indicum]                          |
| c41241.graph_c1 | 10.7234493    | 9.94875889    | 9.18670461    | 4.25686561     | 4.76489518     | 4.5024001      | 4.867E-11 | -2.160386 | down      | PREDICTED: uncharacterized protein LOC105172605 [Sesamum indicum]                          |
| c41246.graph_c0 | 0.85830699    | 0.91644421    | 0.77207092    | 8.9879459      | 9.91255656     | 10.5772332     | 2.458E-17 | 2.514466  | up        | PREDICTED: phosphoglycolate phosphatase 2 [Sesamum indicum]                                |
| c41253.graph_c0 | 0.14028516    | 0.28085128    | 0.18027199    | 65.9123201     | 79.2731729     | 64.973212      | 1.861E-66 | 7.429928  | up        | -                                                                                          |
| c41257.graph_c0 | 5.532751      | 3.81951118    | 3.67748487    | 0              | 0              | 0              | 1.571E-19 | -Inf      | down      | metallothionein-like protein [Oryza officinalis]                                           |
| c41258.graph_c0 | 3.28521468    | 3.76546297    | 3.89936903    | 23.0803625     | 24.7690246     | 24.4632168     | 7.648E-23 | 1.703307  | up        | PREDICTED: phosphoenolpyruvate carboxykinase [ATP]-like [Sesamum indicum]                  |
| c41275.graph_c0 | 0.08226679    | 0.74114247    | 0.31714823    | 3.9410555      | 3.29188245     | 2.56260855     | 0.0002466 | 2.090528  | up        | -                                                                                          |
| c41277.graph_c0 | 1.36006256    | 1.32976342    | 1.30063943    | 16.2887184     | 18.398085      | 20.7940432     | 3.748E-32 | 2.777125  | up        | PREDICTED: preprotein translocase subunit SCY1, chloroplastic [Sesamum indicum]            |
| c41278.graph_c2 | 0.62091596    | 0.62153771    | 0.3989508     | 20.7360252     | 27.5727544     | 29.5212648     | 6.851E-19 | 4.54865   | up        | PREDICTED: uncharacterized protein LOC101261197 [Solanum lycopersicum]                     |
| c41279.graph_c1 | 53.6534929    | 55.5784361    | 57.1888097    | 44.5345289     | 43.6901248     | 42.7988312     | 7.671E-22 | -1.362452 | down      | PREDICTED: nucleolar GTP-binding protein 2 [Sesamum indicum]                               |

| #ID             | 0 h-1<br>FPKM | 0 h-2<br>FPKM | 0 h-3<br>FPKM | 48 h-1<br>FPKM | 48 h-2<br>FPKM | 48 h-3<br>FPKM | FDR       | log2FC    | regulated | nr_annotation                                                                                                                                          |
|-----------------|---------------|---------------|---------------|----------------|----------------|----------------|-----------|-----------|-----------|--------------------------------------------------------------------------------------------------------------------------------------------------------|
| c41280.graph_c0 | 3.53934305    | 3.71159608    | 3.97064726    | 1.19040467     | 1.48040931     | 2.0263242      | 4.293E-08 | -2.281232 | down      | hypothetical protein MIMGU_mgv1a019699mg<br>[Erythranthe guttata]                                                                                      |
| c41283.graph_c0 | 1.33806722    | 1.42490116    | 1.2804559     | 8.47163575     | 11.4197824     | 12.5789092     | 1.021E-13 | 1.982647  | up        | PREDICTED: armadillo repeat-containing protein 6<br>[Sesamum indicum]                                                                                  |
| c41284.graph_c0 | 0.06186708    | 0.08257205    | 0.0530011     | 0.91193589     | 0.9660855      | 0.6254812      | 1.021E-05 | 2.65165   | up        | PREDICTED: putative late blight resistance protein<br>homolog R1A-3 [Sesamum indicum]                                                                  |
| c41289.graph_c0 | 7.09874359    | 6.98872248    | 7.31778197    | 240.895554     | 225.888216     | 253.066795     | 2.44E-152 | 4.054186  | up        | PREDICTED: uncharacterized protein LOC105166112<br>[Sesamum indicum]                                                                                   |
| c41291.graph_c0 | 5.90919927    | 5.50634823    | 5.49452354    | 1.46056921     | 2.86015317     | 3.34746923     | 8.37E-20  | -2.169967 | down      | hypothetical protein MIMGU_mgv11b004345mg<br>[Erythranthe guttata]                                                                                     |
| c41293.graph_c0 | 10.3931163    | 10.5630867    | 10.3239344    | 7.84195105     | 9.30326321     | 10.2183104     | 9.131E-11 | -1.214163 | down      | PREDICTED: cell wall / vacuolar inhibitor of fructosidase<br>1-like [Sesamum indicum]                                                                  |
| c41296.graph_c0 | 8.3318276     | 7.75145274    | 7.93557512    | 94.09656       | 99.3012318     | 108.153494     | 8.263E-46 | 2.631321  | up        | -                                                                                                                                                      |
| c41298.graph_c0 | 35.1650395    | 38.2370615    | 34.4981956    | 15.0292243     | 12.2159022     | 11.7931892     | 1.341E-66 | -2.479175 | down      | unnamed protein product [Coffea canephora]<br>PREDICTED: chitinase/reductase SDK family<br>member on chromosome X-like isoform X1 [Sesamum<br>indicum] |
| c41305.graph_c0 | 0.44239496    | 0.55354744    | 0.52112046    | 2.92086885     | 4.13773527     | 3.95889851     | 5.132E-05 | 1.836118  | up        | PREDICTED: uncharacterized protein LOC105168700<br>[Sesamum indicum]                                                                                   |
| c41313.graph_c0 | 0             | 0             | 0             | 0.75441022     | 0.74925576     | 0.6502925      | 2.198E-11 | Inf       | up        | -                                                                                                                                                      |
| c41315.graph_c0 | 11.3013936    | 10.6928357    | 9.94708098    | 0.74877808     | 1.05765278     | 1.11043039     | 3.187E-63 | -4.47578  | down      | -                                                                                                                                                      |
| c41316.graph_c0 | 6.97131525    | 5.88440092    | 6.68249417    | 21.627968      | 30.8928669     | 33.9171599     | 1.059E-05 | 1.120719  | up        | PREDICTED: zinc finger protein-like 1 homolog [Sesamum<br>indicum]                                                                                     |
| c41319.graph_c0 | 6.81877715    | 7.48402362    | 7.635402      | 3.11065257     | 3.12417172     | 2.8397319      | 1.838E-29 | -2.291185 | down      | hypothetical protein MIMGU_mgv1a0011691mg, partial<br>[Erythranthe guttata]                                                                            |
| c41326.graph_c0 | 6.11389799    | 6.25939947    | 5.87211791    | 92.6508989     | 123.799261     | 134.674829     | 1.529E-31 | 3.243595  | up        | PREDICTED: ABC transporter C family member 4<br>[Sesamum indicum]                                                                                      |
| c41330.graph_c0 | 24.176733     | 21.7297193    | 25.543633     | 8.50929715     | 9.05611032     | 9.0369772      | 3.337E-45 | -2.445    | down      | PREDICTED: E3 ubiquitin-protein ligase RNF5-like<br>[Sesamum indicum]                                                                                  |
| c41334.graph_c1 | 49.1611456    | 54.8161931    | 49.1688643    | 44.7343637     | 49.714346      | 46.8141149     | 6.232E-16 | -1.135088 | down      | PREDICTED: dnaJ homolog subfamily B member 4-like<br>[Malus domestica]                                                                                 |
| c41336.graph_c0 | 0             | 0.06135122    | 0             | 1.24221256     | 3.94792073     | 2.36135106     | 8.424E-05 | 5.92175   | up        | -                                                                                                                                                      |
| c41339.graph_c0 | 4.67610746    | 4.08896587    | 4.83481408    | 0.24758248     | 0.2098269      | 0.13217844     | 1.143E-28 | -5.539265 | down      | PREDICTED: C2 and GRAM domain-containing protein<br>At1g03370-like [Sesamum indicum]                                                                   |
| c41341.graph_c0 | 17.8974575    | 18.1076042    | 19.0012714    | 14.1530517     | 11.582434      | 11.3969368     | 1.764E-20 | -1.580805 | down      | PREDICTED: E3 ubiquitin-protein ligase PRT1 [Nicotiana<br>tomentosiformis]                                                                             |
| c41344.graph_c0 | 0.16754379    | 0.06708463    | 0.25836049    | 3.61184313     | 6.44259007     | 4.94430199     | 8.878E-13 | 3.892651  | up        | PREDICTED: O-glucosyltransferase rumi homolog isoform<br>X2 [Sesamum indicum]                                                                          |

| #ID             | 0 h-1<br>FPKM | 0 h-2<br>FPKM | 0 h-3<br>FPKM | 48 h-1<br>FPKM | 48 h-2<br>FPKM | 48 h-3<br>FPKM | FDR       | log2FC    | regulated | nr_annotation                                                                                      |
|-----------------|---------------|---------------|---------------|----------------|----------------|----------------|-----------|-----------|-----------|----------------------------------------------------------------------------------------------------|
| c41345.graph_c0 | 43.3034388    | 43.3468007    | 40.9385707    | 15.2578575     | 15.7005549     | 13.9870993     | 1.679E-67 | -2.52174  | down      | PREDICTED: F-box/kelch-repeat protein At1g51550 [Sesamum indicum]                                  |
| c41349.graph_c0 | 5.42297203    | 4.36154868    | 5.23662074    | 27.896715      | 32.5207429     | 33.019351      | 2.466E-21 | 1.616159  | up        | PREDICTED: peptidyl-prolyl cis-trans isomerase CYP23 isoform X2 [Sesamum indicum]                  |
| c41351.graph_c0 | 0             | 0             | 0             | 4.01991364     | 5.47535707     | 6.23401696     | 3.816E-17 | Inf       | up        | -                                                                                                  |
| c41356.graph_c0 | 0.99640199    | 0.96300664    | 0.83889325    | 0              | 0              | 0.08449519     | 2.588E-17 | -6.088717 | down      | hypothetical protein MIMGU_mgv1a004102mg [Erythranthe guttata]                                     |
| c41357.graph_c0 | 0             | 0             | 0             | 2.15143113     | 2.03926668     | 2.77074149     | 5.033E-12 | Inf       | up        | PREDICTED: probable plastid-lipid-associated protein 4, chloroplastic isoform X1 [Sesamum indicum] |
| c41358.graph_c0 | 12.2850868    | 11.2995097    | 12.1697943    | 72.6609658     | 73.9422481     | 75.2766192     | 1.928E-29 | 1.615481  | up        | PREDICTED: glucose-6-phosphate isomerase 1, chloroplastic [Sesamum indicum]                        |
| c41361.graph_c0 | 0.39625075    | 0.57694187    | 0.55548862    | 6.83642909     | 6.60953942     | 7.44135631     | 2.642E-12 | 2.752521  | up        | hypothetical protein MIMGU_mgv1a007271mg [Erythranthe guttata]                                     |
| c41362.graph_c0 | 9.21961252    | 8.3479094     | 6.08534128    | 77.524393      | 53.0067189     | 40.1242544     | 0.0012717 | 1.847593  | up        | PREDICTED: gibberellin receptor GID1B-like [Sesamum indicum]                                       |
| c41366.graph_c0 | 11.2083167    | 10.1431267    | 11.3736899    | 7.73484863     | 7.44065062     | 7.11974669     | 1.064E-24 | -1.570519 | down      | PREDICTED: LRR receptor-like serine/threonine-protein kinase GSO2 [Sesamum indicum]                |
| c41376.graph_c0 | 6.53293407    | 4.12399375    | 3.93282977    | 49.612495      | 58.8194807     | 59.5353074     | 4.847E-40 | 2.508372  | up        | hypothetical protein MIMGU_mgv1a014628mg [Erythranthe guttata]                                     |
| c41377.graph_c0 | 1.03828247    | 0.62359329    | 1.51213196    | 19.6408219     | 19.7261825     | 19.9728974     | 1.271E-20 | 3.200627  | up        | hypothetical protein MIMGU_mgv1a013935mg [Erythranthe guttata]                                     |
| c41379.graph_c0 | 20.4963394    | 20.7757512    | 21.1456645    | 10.9900101     | 11.5479279     | 10.4148673     | 3.537E-33 | -1.939443 | down      | PREDICTED: uncharacterized protein LOC105169116 [Sesamum indicum]                                  |
| c41381.graph_c0 | 10.1966006    | 9.42319765    | 8.23874046    | 6.88328983     | 7.68852612     | 6.7745465      | 4.552E-22 | -1.40076  | down      | PREDICTED: uncharacterized protein LOC105157976 isoform X1 [Sesamum indicum]                       |
| c41384.graph_c0 | 14.7876585    | 14.0111393    | 13.3258115    | 4.54111852     | 4.71999529     | 4.61245145     | 7.873E-34 | -2.619385 | down      | hypothetical protein MIMGU_mgv1a000172mg [Erythranthe guttata]                                     |
| c41385.graph_c0 | 8.48109528    | 9.81132005    | 9.07124256    | 5.75473409     | 5.35297432     | 4.87074594     | 4.466E-12 | -1.791523 | down      | PREDICTED: uncharacterized protein LOC105163010 [Sesamum indicum]                                  |
| c41389.graph_c0 | 45.3886524    | 47.1378811    | 46.7824852    | 286.258433     | 293.012207     | 301.839549     | 2.998E-31 | 1.642759  | up        | unnamed protein product [Vitis vinifera]                                                           |
| c41390.graph_c0 | 9.56401049    | 7.9779895     | 8.1043625     | 46.2896228     | 46.6708791     | 51.755139      | 7.678E-15 | 1.479156  | up        | PREDICTED: uncharacterized protein LOC105157940 [Sesamum indicum]                                  |
| c41394.graph_c1 | 0.21726735    | 0.36247486    | 0.09306572    | 6.1382663      | 6.14933858     | 6.23356746     | 1.583E-10 | 3.773876  | up        | PREDICTED: squamosa promoter-binding-like protein 6, partial [Sesamum indicum]                     |
| c41406.graph_c0 | 2.63190909    | 2.53321591    | 2.73170212    | 15.9096725     | 15.3526901     | 14.5712293     | 1.748E-16 | 1.520191  | up        | PREDICTED: uncharacterized protein LOC105161164 [Sesamum indicum]                                  |

| #ID             | 0 h-1<br>FPKM | 0 h-2<br>FPKM | 0 h-3<br>FPKM | 48 h-1<br>FPKM | 48 h-2<br>FPKM | 48 h-3<br>FPKM | FDR       | log2FC    | regulated | nr_annotation                                                                                         |
|-----------------|---------------|---------------|---------------|----------------|----------------|----------------|-----------|-----------|-----------|-------------------------------------------------------------------------------------------------------|
| c41408.graph_c0 | 3.45172411    | 2.4149111     | 2.52781628    | 0.03419305     | 0              | 0              | 1.035E-34 | -8.897762 | down      | PREDICTED: probable glycosyltransferase At3g07620 isoform X1 [Sesamum indicum]                        |
| c41411.graph_c0 | 3.00497114    | 3.18492017    | 2.61219583    | 10.503542      | 13.0680249     | 13.5118361     | 0.0001567 | 1.054834  | up        | PREDICTED: ABC transporter I family member 20-like [Sesamum indicum]                                  |
| c41415.graph_c0 | 33.5689255    | 33.128597     | 32.946264     | 20.784462      | 23.8669797     | 23.888749      | 1.146E-27 | -1.559718 | down      | PREDICTED: nuclear pore complex protein NUP50A-like [Sesamum indicum]                                 |
| c41420.graph_c0 | 16.1887771    | 15.569498     | 14.6846256    | 11.0540226     | 13.3833103     | 12.5939909     | 2.127E-10 | -1.346387 | down      | PREDICTED: 60S ribosomal protein L18a-like protein [Nicotiana sylvestris]                             |
| c41421.graph_c0 | 28.9822446    | 28.9454807    | 30.8249798    | 10.1715558     | 12.1866114     | 14.3839722     | 4.876E-36 | -2.295047 | down      | hypothetical protein MIMGU_mgv1a015977mg [Erythranthe guttata]                                        |
| c41425.graph_c0 | 0.37406076    | 0.65526182    | 0.90128041    | 4.09223391     | 4.60902934     | 4.67612532     | 6.915E-05 | 1.76565   | up        | PREDICTED: uncharacterized protein LOC105166018 [Sesamum indicum]                                     |
| c41426.graph_c0 | 7.68078262    | 9.09622248    | 7.61110577    | 1.54476884     | 2.00602647     | 1.79575175     | 4.929E-45 | -3.210255 | down      | PREDICTED: uncharacterized protein LOC105177245 [Sesamum indicum]                                     |
| c41428.graph_c0 | 1.54016858    | 1.71201609    | 1.85260229    | 7.25950756     | 7.54200021     | 8.04497151     | 1.753E-11 | 1.141788  | up        | PREDICTED: uncharacterized protein LOC105169752 [Sesamum indicum]                                     |
| c41429.graph_c0 | 0.38972661    | 0.39011686    | 0.37561059    | 15.6183083     | 11.8862815     | 13.8172086     | 1.177E-15 | 4.147526  | up        | hypothetical protein PHAVU_005G150000g [Phaseolus vulgaris]                                           |
| c41431.graph_c0 | 61.0710242    | 61.4519623    | 64.2471529    | 12.9987724     | 13.7706231     | 13.9231215     | 7.843E-95 | -3.217568 | down      | PREDICTED: uncharacterized protein LOC105163802 [Sesamum indicum]                                     |
| c41432.graph_c1 | 0.33516741    | 0.047929      | 0.06152906    | 0.88222309     | 1.2149909      | 1.41299424     | 0.0010969 | 1.969349  | up        | -                                                                                                     |
| c41433.graph_c0 | 2.81908084    | 2.55568639    | 2.39230316    | 16.5627726     | 19.5708164     | 21.6265619     | 3.774E-12 | 1.874761  | up        | PREDICTED: palmitoyl-monogalactosyldiacylglycerol delta-7 desaturase, chloroplastic [Sesamum indicum] |
| c41436.graph_c0 | 2.70928434    | 1.94556327    | 2.49762483    | 16.4408422     | 17.5895251     | 20.0846483     | 5.449E-11 | 1.899517  | up        | PREDICTED: protein N-lysine methyltransferase METTL21A [Sesamum indicum]                              |
| c41438.graph_c0 | 1.53207402    | 1.60663712    | 1.82814893    | 7.29247368     | 8.36631579     | 8.55205796     | 4.912E-05 | 1.263292  | up        | -                                                                                                     |
| c41439.graph_c0 | 23.4714234    | 24.4408261    | 20.499516     | 13.1144554     | 11.9693523     | 12.3521553     | 5.43E-41  | -1.884101 | down      | PREDICTED: mediator of RNA polymerase II transcription subunit 14 [Sesamum indicum]                   |
| c41443.graph_c0 | 9.54768272    | 8.99367119    | 7.53633311    | 7.58569477     | 8.33375801     | 7.19199399     | 8.113E-12 | -1.190072 | down      | PREDICTED: uncharacterized protein LOC105168944 isoform X1 [Sesamum indicum]                          |
| c41444.graph_c0 | 0.10022092    | 0.20064255    | 0.25757569    | 3.32388166     | 4.49937447     | 4.27204544     | 1.303E-09 | 3.40713   | up        | PREDICTED: squamosa promoter-binding-like protein 6 [Sesamum indicum]                                 |
| c41446.graph_c0 | 3.13854744    | 2.29188877    | 3.10751497    | 26.8050209     | 28.8988209     | 24.4414208     | 8.716E-36 | 2.21198   | up        | PREDICTED: ADP-ribosylation factor GTPase-activating protein AGD3-like [Sesamum indicum]              |
| c41448.graph_c0 | 0.72569242    | 0.90075967    | 0.59682783    | 11.980509      | 12.7485568     | 13.0158953     | 3.459E-27 | 3.06958   | up        | PREDICTED: phosphoacetylglucosamine mutase [Sesamum indicum]                                          |
| c41449.graph_c0 | 15.8612738    | 17.3102489    | 13.7496237    | 8.78134752     | 11.1412656     | 11.1181521     | 3.491E-20 | -1.616066 | down      | PREDICTED: sodium-coupled neutral amino acid transporter 2-like [Sesamum indicum]                     |

| #ID             | 0 h-1<br>FPKM | 0 h-2<br>FPKM | 0 h-3<br>FPKM | 48 h-1<br>FPKM | 48 h-2<br>FPKM | 48 h-3<br>FPKM | FDR       | log2FC    | regulated | nr_annotation                                                                                                                   |
|-----------------|---------------|---------------|---------------|----------------|----------------|----------------|-----------|-----------|-----------|---------------------------------------------------------------------------------------------------------------------------------|
| c41451.graph_c0 | 1.86128018    | 0.95429325    | 1.34175197    | 0              | 0              | 0              | 6.605E-16 | -Inf      | down      | hypothetical protein GUITHDRAFT_154386 [Guillardia theta CCMP2712]                                                              |
| c41454.graph_c0 | 1.52325973    | 1.28653738    | 1.16223538    | 78.805538      | 92.4048357     | 105.980971     | 2.099E-80 | 5.105734  | up        | PREDICTED: BURP domain-containing protein 3-like [Sesamum indicum]                                                              |
| c41459.graph_c0 | 1.96138289    | 2.39964623    | 1.40025259    | 0.90347692     | 2.12694278     | 2.14375556     | 0.0080032 | -1.182295 | down      | PREDICTED: heptahelical transmembrane protein 4-like [Sesamum indicum]                                                          |
| c41461.graph_c1 | 24.512277     | 22.5589085    | 19.764233     | 14.9072754     | 16.0009319     | 13.8335039     | 5.27E-20  | -1.59471  | down      | -                                                                                                                               |
| c41464.graph_c0 | 0.42753476    | 0.53495359    | 0.85843608    | 16.0257038     | 20.524005      | 20.4146295     | 3.517E-59 | 3.938286  | up        | PREDICTED: nucleobase-ascorbate transporter 12 [Sesamum indicum]                                                                |
| c41469.graph_c0 | 5.97028658    | 5.43647325    | 5.49418106    | 5.50021741     | 4.99978183     | 5.93602162     | 7.017E-05 | -1.056654 | down      | hypothetical protein MIMGU_mgv1a025668mg [Erythranthe guttata]                                                                  |
| c41473.graph_c0 | 6.54698428    | 5.5897842     | 6.48856087    | 39.8946866     | 42.7647322     | 41.5137795     | 7.548E-31 | 1.717995  | up        | PREDICTED: probable polygalacturonase [Sesamum indicum]                                                                         |
| c41478.graph_c0 | 8.23187447    | 7.13506858    | 7.68852142    | 4.74611523     | 5.44027735     | 5.16152364     | 8.965E-23 | -1.606472 | down      | PREDICTED: LOW QUALITY PROTEIN: putative pentatricopeptide repeat-containing protein At5g13230, mitochondrial [Sesamum indicum] |
| c41480.graph_c0 | 1375.94165    | 1236.64402    | 1542.88942    | 335.10848      | 446.227708     | 339.969319     | 2.965E-38 | -2.912522 | down      | PREDICTED: pathogenesis-related protein STH-2-like [Sesamum indicum]                                                            |
| c41482.graph_c0 | 22.3336105    | 23.8194916    | 20.8776458    | 7.71053793     | 7.65876626     | 6.92193814     | 5.242E-71 | -2.603884 | down      | PREDICTED: autophagy-related protein 18g-like [Sesamum indicum]                                                                 |
| c41483.graph_c0 | 0             | 0             | 0             | 4.19138882     | 4.19696585     | 4.70015721     | 1.671E-15 | Inf       | up        | PREDICTED: uncharacterized protein LOC105112702 isoform X1 [Populus euphratica]                                                 |
| c41484.graph_c0 | 0.21912965    | 0.14623271    | 0.28159027    | 1.74959653     | 2.56636436     | 3.59257031     | 4.061E-05 | 2.580731  | up        | hypothetical protein MIMGU_mgv1a017010mg [Erythranthe guttata]                                                                  |
| c41486.graph_c0 | 1250.05621    | 1227.48123    | 1331.97371    | 9.55392064     | 10.1212204     | 9.11669397     | 7.85E-258 | -8.066325 | down      | glucose and ribitol dehydrogenase homolog 1-like precursor [Sesamum indicum]                                                    |
| c41487.graph_c0 | 6.01185273    | 7.28036346    | 6.15876532    | 1.2006562      | 0.53339824     | 0.41354968     | 7.281E-35 | -4.176688 | down      | hypothetical protein JCGZ_16285 [Jatropha curcas]                                                                               |
| c41489.graph_c0 | 397.669757    | 375.472013    | 386.714498    | 51.7137875     | 57.7116674     | 62.0860892     | 1.98E-114 | -3.777527 | down      | PREDICTED: protein DJ-1 homolog D [Sesamum indicum]                                                                             |
| c41491.graph_c0 | 33.9097872    | 36.7992544    | 33.6127894    | 21.363519      | 25.1018262     | 21.9887366     | 1.877E-30 | -1.626952 | down      | PREDICTED: CTD small phosphatase-like protein 2 isoform X2 [Sesamum indicum]                                                    |
| c41493.graph_c0 | 28.24164      | 27.478362     | 26.7106364    | 12.6274225     | 16.7582793     | 16.9771773     | 3.655E-32 | -1.852429 | down      | PREDICTED: ethylene-responsive transcription factor 3-like [Sesamum indicum]                                                    |
| c41493.graph_c1 | 10.7867313    | 10.9230853    | 9.50954919    | 4.62206532     | 7.34477663     | 9.87044623     | 1.988E-05 | -1.541653 | down      | PREDICTED: ethylene-responsive transcription factor 3-like [Sesamum indicum]                                                    |
| c41495.graph_c0 | 3.38945407    | 3.21659625    | 2.09294232    | 0.56774294     | 0.77329903     | 1.11860013     | 2.088E-11 | -2.843306 | down      | ATP binding protein, putative [Ricinus communis]                                                                                |
| c41499.graph_c0 | 2.76138325    | 2.33225017    | 1.7742434     | 0.07949895     | 0              | 0              | 2.712E-19 | -7.389139 | down      | -                                                                                                                               |
| c41499.graph_c1 | 99.2115304    | 106.476872    | 99.9499896    | 13.8622164     | 15.7311774     | 15.3601945     | 3.07E-127 | -3.784763 | down      | PREDICTED: UV-stimulated scaffold protein A homolog [Sesamum indicum]                                                           |

| #ID             | 0 h-1<br>FPKM | 0 h-2<br>FPKM | 0 h-3<br>FPKM | 48 h-1<br>FPKM | 48 h-2<br>FPKM | 48 h-3<br>FPKM | FDR       | log2FC    | regulated | nr_annotation                                                                                        |
|-----------------|---------------|---------------|---------------|----------------|----------------|----------------|-----------|-----------|-----------|------------------------------------------------------------------------------------------------------|
| c41504.graph_c0 | 0.48058256    | 1.30574458    | 0.44111973    | 6.26166516     | 7.63854693     | 8.27296994     | 1.195E-06 | 2.298556  | up        | PREDICTED: uncharacterized protein LOC105130684 isoform X1 [Populus euphratica]                      |
| c41505.graph_c0 | 2.29642184    | 3.0944326     | 4.08599028    | 2.68520185     | 2.58604161     | 2.60648341     | 0.0074928 | -1.288572 | down      | -                                                                                                    |
| c41507.graph_c0 | 0.722804      | 0.28311956    | 0.60575984    | 2.40300946     | 3.74186809     | 5.25529406     | 0.0015554 | 1.794244  | up        | PREDICTED: endoglucanase 6 [Sesamum indicum]                                                         |
| c41508.graph_c0 | 2.1508574     | 2.05287111    | 2.66752051    | 1.65893871     | 2.05035181     | 2.00915475     | 0.0002089 | -1.288815 | down      | hypothetical protein MIMGU_mgv1a001446mg [Erythranthe guttata]                                       |
| c41510.graph_c0 | 1.12753426    | 1.12866332    | 0.94250537    | 7.1603714      | 7.58554526     | 8.6595232      | 4.077E-21 | 1.853646  | up        | PREDICTED: 1-phosphatidylinositol-3-phosphate 5-kinase FAB1B-like [Sesamum indicum]                  |
| c41513.graph_c0 | 0             | 0.25431592    | 0             | 3.2768125      | 2.14895293     | 3.67932064     | 2.964E-08 | 4.159553  | up        | hypothetical protein MIMGU_mgv1a001330mg [Erythranthe guttata]                                       |
| c41514.graph_c0 | 0.25111178    | 0.4608326     | 0.26890715    | 2.58330285     | 2.49161886     | 3.01906636     | 0.0001019 | 2.028369  | up        | PREDICTED: snugosmin-1-like isoform X2 [Sesamum indicum]                                             |
| c41516.graph_c0 | 16.7274208    | 17.5464099    | 13.9429609    | 2.12034865     | 3.52982503     | 4.26186063     | 1.108E-67 | -3.307635 | down      | PREDICTED: LOW QUALITY PROTEIN: ubiquitin carboxyl-terminal hydrolase 22 [Sesamum indicum]           |
| c41519.graph_c0 | 0             | 0             | 0.06244676    | 1.52214834     | 1.70738639     | 3.94368957     | 8.086E-05 | 5.785219  | up        | PREDICTED: solute carrier family 35 member F1-like isoform X1 [Sesamum indicum]                      |
| c41521.graph_c0 | 77.8841589    | 79.4215844    | 77.1180402    | 52.9474057     | 51.5930314     | 43.2569409     | 1.27E-32  | -1.680883 | down      | PREDICTED: uncharacterized protein LOC105162845 [Sesamum indicum]                                    |
| c41523.graph_c0 | 4.16878059    | 4.62005731    | 3.63513978    | 0.41148778     | 0.29061427     | 0.61023225     | 3.482E-13 | -4.25881  | down      | -                                                                                                    |
| c41525.graph_c0 | 0.30398167    | 0.30428606    | 0             | 5.88100262     | 5.78519423     | 5.85584276     | 4.084E-08 | 3.847621  | up        | PREDICTED: LOW QUALITY PROTEIN: LOB domain-containing protein 6 [Sesamum indicum]                    |
| c41525.graph_c1 | 18.0441911    | 18.0622596    | 18.057522     | 6.64939429     | 6.07798345     | 5.62861539     | 2.765E-50 | -2.57612  | down      | PREDICTED: LOB domain-containing protein 36 [Sesamum indicum]                                        |
| c41527.graph_c0 | 54.6246814    | 55.2877734    | 60.5296586    | 30.4462607     | 32.6248585     | 29.7377117     | 2.583E-39 | -1.896094 | down      | PREDICTED: phosphoribosylaminoimidazole-succinocarboxamide synthase, chloroplastic [Sesamum indicum] |
| c41529.graph_c0 | 28.9502255    | 26.9455857    | 27.0858021    | 16.9851114     | 15.3169223     | 17.1533305     | 2.775E-26 | -1.762524 | down      | PREDICTED: LOB domain-containing protein 36 [Sesamum indicum]                                        |
| c41530.graph_c0 | 1.55962074    | 1.40506422    | 1.5031308     | 1.14945948     | 0.45664235     | 0.44746718     | 3.039E-05 | -2.119229 | down      | retrotransposon protein, putative, unclassified [Oryza sativa Japonica Group]                        |
| c41532.graph_c0 | 4.69804527    | 4.11896004    | 4.37174682    | 2.59688744     | 3.32027784     | 3.4793221      | 1.653E-07 | -1.511112 | down      | PREDICTED: uncharacterized protein LOC105160266 isoform X1 [Sesamum indicum]                         |
| c41535.graph_c0 | 260.403141    | 293.444909    | 249.876169    | 57.5357101     | 65.4373755     | 71.079119      | 1.138E-84 | -3.069811 | down      | PREDICTED: adagio protein 1-like [Sesamum indicum]                                                   |
| c41538.graph_c0 | 3.03051511    | 3.981534      | 2.79905105    | 20.8811466     | 22.2134706     | 19.2527291     | 1.588E-16 | 1.652193  | up        | PREDICTED: allantate deiminase [Sesamum indicum]                                                     |
| c41539.graph_c0 | 0.80211589    | 0.94890438    | 1.26501219    | 16.5762495     | 16.9200208     | 16.3334809     | 1.585E-52 | 3.024282  | up        | PREDICTED: poly [ADP-ribose] polymerase 1 [Sesamum indicum]                                          |
| c41543.graph_c0 | 155.144725    | 159.08041     | 169.199722    | 7.61663464     | 3.28732997     | 4.76916587     | 2.93E-245 | -5.951387 | down      | hypothetical protein MIMGU_mgv1a008932mg [Erythranthe guttata]                                       |



| #ID             | 0 h-1<br>FPKM | 0 h-2<br>FPKM | 0 h-3<br>FPKM | 48 h-1<br>FPKM | 48 h-2<br>FPKM | 48 h-3<br>FPKM | FDR       | log2FC    | regulated | nr_annotation                                                                                                                        |
|-----------------|---------------|---------------|---------------|----------------|----------------|----------------|-----------|-----------|-----------|--------------------------------------------------------------------------------------------------------------------------------------|
| c41543.graph_c1 | 99.0368586    | 94.355885     | 93.6487752    | 4.3037365      | 3.24215962     | 2.63805788     | 9.77E-199 | -5.826448 | down      | PREDICTED: gibberellin 2-beta-dioxygenase 8 [Sesamum indicum]                                                                        |
| c41545.graph_c0 | 2.96274525    | 2.04775352    | 2.49283895    | 57.6114012     | 73.9754086     | 84.5697485     | 2.331E-35 | 3.826062  | up        | PREDICTED: 60S ribosomal protein L5-like [Nicotiana sylvestris]                                                                      |
| c41551.graph_c0 | 34.8039768    | 34.1373748    | 29.7162706    | 17.0002133     | 13.2222854     | 9.76532997     | 1.198E-14 | -2.311177 | down      | -                                                                                                                                    |
| c41551.graph_c1 | 41.1516742    | 39.9078984    | 38.7656497    | 15.5092935     | 15.1415715     | 12.7477827     | 4.687E-67 | -2.480315 | down      | PREDICTED: uncharacterized protein LOC105172898 isoform X1 [Sesamum indicum]                                                         |
| c41555.graph_c0 | 0             | 0             | 0             | 2.41866295     | 3.07473615     | 4.80086468     | 1.013E-11 | Inf       | up        | PREDICTED: protein IQ-DOMAIN 1-like [Sesamum indicum]                                                                                |
| c41556.graph_c0 | 4.00111236    | 4.14564936    | 4.41996144    | 3.427413       | 3.01435572     | 2.41673664     | 0.0001653 | -1.518567 | down      | transcription factor, putative [Ricinus communis] strong similarity to g15000044 112P20.12 protease                                  |
| c41564.graph_c0 | 0.70928964    | 0.75018856    | 0.46433136    | 0              | 0              | 0.01097039     | 7.028E-26 | -8.490664 | down      | homolog from Arabidopsis thaliana BAC gb AF080119 and is a member of the reverse transcriptase family PF00078 [Arabidopsis thaliana] |
| c41565.graph_c0 | 3.51057913    | 4.56832278    | 3.30823766    | 2.31782504     | 2.11283301     | 3.02163645     | 3.369E-05 | -1.628635 | down      | PREDICTED: uncharacterized protein LOC105165462 [Sesamum indicum]                                                                    |
| c41567.graph_c0 | 3.7865713     | 6.06458077    | 4.91711398    | 61.1027187     | 61.3076515     | 72.6006874     | 5.55E-58  | 2.703446  | up        | chloroplast omega-3 desaturase [Portulaca oleracea]                                                                                  |
| c41569.graph_c0 | 1.17694282    | 0.78541424    | 0.94106017    | 0.722851       | 0.51051532     | 0.85758463     | 0.0012927 | -1.487867 | down      | PREDICTED: uncharacterized protein LOC105179857 isoform X2 [Sesamum indicum]                                                         |
| c41570.graph_c0 | 31.9958752    | 32.5131857    | 28.8746219    | 22.2191695     | 23.5385159     | 22.313822      | 3.187E-25 | -1.473082 | down      | PREDICTED: RNA polymerase-associated protein LEO1 [Sesamum indicum]                                                                  |
| c41572.graph_c0 | 4.56175876    | 4.76272782    | 4.22319055    | 39.0434141     | 46.8192178     | 50.98504       | 1.536E-35 | 2.31601   | up        | PREDICTED: ER lumen protein-retaining receptor-like [Sesamum indicum]                                                                |
| c41575.graph_c0 | 3.22592004    | 2.95432901    | 2.55782158    | 18.2320403     | 20.8106829     | 20.2362518     | 1.096E-21 | 1.744559  | up        | PREDICTED: glycosylphosphatidylinositol anchor attachment 1 protein [Sesamum indicum]                                                |
| c41577.graph_c0 | 7.76203014    | 5.06346689    | 6.94853927    | 51.9042015     | 52.0921969     | 59.6960971     | 3.472E-22 | 2.030506  | up        | PREDICTED: ergosterol biosynthetic protein 28 [Sesamum indicum]                                                                      |
| c41581.graph_c0 | 15.1052992    | 15.7949419    | 14.0350242    | 9.7256711      | 11.3992511     | 14.0394804     | 4.201E-17 | -1.374712 | down      | PREDICTED: trehalose-phosphate phosphatase A-like isoform X2 [Sesamum indicum]                                                       |
| c41582.graph_c0 | 5.75070916    | 7.40431141    | 5.35907977    | 40.6646334     | 30.8688199     | 26.7730093     | 0.0001233 | 1.399738  | up        | PREDICTED: lysine histidine transporter-like 8 [Sesamum indicum]                                                                     |
| c41586.graph_c0 | 0.03510107    | 0.21081731    | 0.09021253    | 8.21369835     | 8.3930995      | 10.7613338     | 1.963E-30 | 5.328229  | up        | PREDICTED: protein brevis ramis-like 4 [Sesamum indicum]                                                                             |
| c41597.graph_c0 | 31.5110882    | 27.7158806    | 34.7495647    | 13.233154      | 13.4976706     | 13.4108072     | 1.522E-27 | -2.246548 | down      | PREDICTED: nmjA-family protein AFP1-like [Sesamum indicum]                                                                           |
| c41598.graph_c0 | 4.86810013    | 4.00575047    | 3.55196605    | 65.1817922     | 46.5045464     | 43.3550474     | 4.561E-09 | 2.633961  | up        | hypothetical protein MIMGU_mgv1a006127mg [Erythranthe guttata]                                                                       |
| c41604.graph_c0 | 13.4411416    | 13.8476272    | 13.1519144    | 8.37982977     | 8.41757629     | 7.35976545     | 5.269E-33 | -1.75949  | down      | Calcium-transporting ATPase 12, plasma membrane-type [Morus notabilis]                                                               |
| c41605.graph_c1 | 25.130711     | 24.4762786    | 23.2095517    | 17.2051899     | 19.5204639     | 20.5652195     | 3.134E-22 | -1.365394 | down      | PREDICTED: WD repeat-containing protein LWD1 [Sesamum indicum]                                                                       |

| #ID             | 0 h-1<br>FPKM | 0 h-2<br>FPKM | 0 h-3<br>FPKM | 48 h-1<br>FPKM | 48 h-2<br>FPKM | 48 h-3<br>FPKM | FDR       | log2FC    | regulated | nr_annotation                                                                                       |
|-----------------|---------------|---------------|---------------|----------------|----------------|----------------|-----------|-----------|-----------|-----------------------------------------------------------------------------------------------------|
| c41610.graph_c0 | 1.06087295    | 1.00293885    | 0.83310562    | 11.3480656     | 10.6989153     | 7.53684555     | 7.247E-09 | 2.340913  | up        | PREDICTED: uncharacterized protein LOC105179150 [Sesamum indicum]                                   |
| c41615.graph_c0 | 2.68720295    | 2.07855428    | 1.80506205    | 11.0559235     | 11.7422129     | 11.4144971     | 8.108E-08 | 1.365353  | up        | hypothetical protein MIMGU_mgv1a003382mg [Erythranthe guttata]                                      |
| c41630.graph_c0 | 70.7283071    | 67.3570377    | 70.6141754    | 451.582251     | 458.721178     | 465.928734     | 1.426E-33 | 1.703217  | up        | unknown [Lotus japonicus]                                                                           |
| c41631.graph_c0 | 8.71157875    | 6.31074493    | 7.43859924    | 5.49125102     | 8.11067901     | 9.06744088     | 0.0003333 | -1.011202 | down      | hypothetical protein VITISV_026847 [Vitis vinifera]                                                 |
| c41639.graph_c0 | 6.0705277     | 5.55016774    | 5.52239696    | 41.3628401     | 41.6631638     | 43.9115491     | 1.333E-38 | 1.871151  | up        | PREDICTED: alpha-1,4 glucan phosphorylase L-1 isozyme, chloroplastic/amyloplastic [Sesamum indicum] |
| c41640.graph_c0 | 1186.59981    | 1029.49954    | 1151.16288    | 79.5249507     | 77.3893523     | 71.1107243     | 1.93E-130 | -4.900738 | down      | PREDICTED: ubiquitin carboxyl-terminal hydrolase isozyme L3 [Sesamum indicum]                       |
| c41642.graph_c0 | 0.19054544    | 0.25431499    | 0.24485844    | 3.62788637     | 4.02927211     | 5.2065669      | 2.708E-08 | 3.198285  | up        | PREDICTED: protein polybromo-1-like [Sesamum indicum]                                               |
| c41645.graph_c0 | 0             | 0.06579297    | 0             | 2.1496011      | 2.46968468     | 2.55924934     | 1.608E-13 | 5.761004  | up        | PREDICTED: MATE efflux family protein 5-like isoform X3 [Sesamum indicum]                           |
| c41648.graph_c0 | 3.74827025    | 2.98237771    | 3.21111711    | 1.06250801     | 0.65659907     | 0.70905993     | 2.238E-09 | -3.040974 | down      | hypothetical protein VITISV_011460 [Vitis vinifera]                                                 |
| c41653.graph_c0 | 18.8351338    | 19.0782242    | 18.9025445    | 3.66304139     | 4.20848183     | 4.08566684     | 1.225E-93 | -3.268238 | down      | hypothetical protein MIMGU_mgv1a026893mg [Erythranthe guttata]                                      |
| c41653.graph_c1 | 9.52065653    | 9.3408485     | 10.0468089    | 4.47265452     | 2.70756293     | 2.84267221     | 1.895E-17 | -2.536365 | down      | PREDICTED: uncharacterized protein LOC105160086 [Sesamum indicum]                                   |
| c41654.graph_c0 | 7.4687153     | 7.35998382    | 6.98685015    | 53.9936332     | 59.6357464     | 60.3514079     | 6.158E-43 | 1.976767  | up        | PREDICTED: coatomer subunit beta-1 [Sesamum indicum]                                                |
| c41654.graph_c1 | 0.19815456    | 0.06611766    | 0             | 2.31233683     | 1.41821292     | 1.89506893     | 6.226E-07 | 3.420658  | up        | PREDICTED: coatomer subunit beta-1 [Sesamum indicum]                                                |
| c41657.graph_c0 | 16.1589179    | 15.4092761    | 14.6575406    | 4.01533721     | 4.50265327     | 4.10494546     | 1.036E-65 | -2.8907   | down      | PREDICTED: cysteine synthase 2 [Sesamum indicum]                                                    |
| c41660.graph_c0 | 27.2929906    | 29.6002339    | 27.929079     | 15.7906264     | 16.276139      | 15.2845616     | 1.426E-32 | -1.858491 | down      | hypothetical protein MIMGU_mgv1a007698mg [Erythranthe guttata]                                      |
| c41662.graph_c0 | 287.467525    | 307.739525    | 280.128695    | 64.2303498     | 64.2428227     | 54.3596515     | 1.244E-81 | -3.274926 | down      | PREDICTED: uncharacterized protein LOC105179373 [Sesamum indicum]                                   |
| c41664.graph_c0 | 21.2811381    | 21.1184095    | 21.972188     | 8.72299769     | 12.4035193     | 10.9831411     | 1.634E-40 | -2.026869 | down      | PREDICTED: probable inactive purple acid phosphatase 27 [Sesamum indicum]                           |
| c41665.graph_c0 | 1.03419893    | 1.03523452    | 1.52833455    | 33.3470027     | 39.1626202     | 42.0070212     | 1.948E-61 | 3.966864  | up        | NAD(P)-binding Rossmann-fold superfamily protein [Theobroma cacao]                                  |
| c41667.graph_c0 | 2.87274291    | 2.95549785    | 2.51233098    | 1.58058334     | 1.28503258     | 1.36278445     | 2.988E-16 | -1.992278 | down      | PREDICTED: phospholipase A I-like [Sesamum indicum]                                                 |
| c41668.graph_c0 | 51.5986078    | 57.7922768    | 57.4070139    | 37.3874961     | 39.2573196     | 37.7969164     | 7.619E-28 | -1.562265 | down      | PREDICTED: NASP-related protein sim3 isoform X1 [Sesamum indicum]                                   |
| c41676.graph_c0 | 5.00707781    | 6.00433313    | 5.61775855    | 3.13767235     | 3.07592493     | 3.12524103     | 8.264E-15 | -1.850059 | down      | PREDICTED: uncharacterized protein LOC105161819 isoform X2 [Sesamum indicum]                        |
| c41679.graph_c0 | 2.24829945    | 1.45623874    | 1.78447735    | 0.18276001     | 0.38722414     | 0.32523751     | 4.861E-11 | -3.644284 | down      | hypothetical protein MIMGU_mgv1a009883mg [Erythranthe guttata]                                      |

| #ID             | 0 h-1<br>FPKM | 0 h-2<br>FPKM | 0 h-3<br>FPKM | 48 h-1<br>FPKM | 48 h-2<br>FPKM | 48 h-3<br>FPKM | FDR       | log2FC    | regulated | nr_annotation                                                                       |
|-----------------|---------------|---------------|---------------|----------------|----------------|----------------|-----------|-----------|-----------|-------------------------------------------------------------------------------------|
| c41681.graph_c0 | 4.66483403    | 5.37312921    | 4.92698335    | 2.29595103     | 2.59859158     | 2.88104585     | 3.1E-17   | -1.965115 | down      | PREDICTED: uncharacterized protein LOC105169002 isoform X1 [Sesamum indicum]        |
| c41686.graph_c0 | 2.0055034     | 2.14134572    | 1.34011866    | 29.7586861     | 36.5103324     | 46.0534677     | 2.108E-20 | 3.336864  | up        | PREDICTED: BTB/POZ domain-containing protein NPY4-like [Sesamum indicum]            |
| c41688.graph_c0 | 19.395995     | 17.6853305    | 17.8503065    | 146.017448     | 160.123094     | 160.15043      | 1.381E-44 | 2.066905  | up        | PREDICTED: 60S ribosomal protein L18a-2-like [Sesamum indicum]                      |
| c41690.graph_c0 | 14.8190637    | 15.8464558    | 13.8436068    | 87.2721347     | 70.7845096     | 63.5578859     | 1.575E-06 | 1.304535  | up        | PREDICTED: uncharacterized protein LOC105167598 [Sesamum indicum]                   |
| c41690.graph_c1 | 35.2247556    | 35.4659258    | 32.7759736    | 185.896449     | 153.924278     | 147.62085      | 1.209E-08 | 1.223567  | up        | PREDICTED: uncharacterized protein LOC105167598 [Sesamum indicum]                   |
| c41692.graph_c0 | 34.778187     | 33.7123665    | 31.5037365    | 14.0315403     | 14.6659894     | 13.6201965     | 1.231E-47 | -2.257345 | down      | PREDICTED: protein kinase 2B, chloroplastic-like isoform X2 [Sesamum indicum]       |
| c41697.graph_c0 | 1.40906561    | 1.07859974    | 1.27814478    | 0.11454028     | 0.08089436     | 0.2038345      | 2.855E-13 | -4.257088 | down      | -                                                                                   |
| c41699.graph_c0 | 12.2198912    | 11.5591627    | 10.5703338    | 7.03154642     | 8.91572724     | 7.26157828     | 2.738E-15 | -1.584741 | down      | PREDICTED: DOX/D/SNOKINA protein 1 [Sesamum indicum]                                |
| c41702.graph_c0 | 7.15259152    | 7.41677056    | 6.92887386    | 29.0610928     | 33.471591      | 34.2773949     | 1.699E-11 | 1.151161  | up        | hypothetical protein MIMGU_mgv1a006372mg [Erythranthe guttata]                      |
| c41702.graph_c1 | 1.8885449     | 1.30876338    | 1.96015209    | 1.80676808     | 0.85068964     | 1.19085287     | 0.0044447 | -1.429262 | down      | -                                                                                   |
| c41704.graph_c0 | 1.63627444    | 1.55801473    | 0.9744115     | 5.95623718     | 7.01101229     | 7.099147       | 0.0007309 | 1.25153   | up        | PREDICTED: GTP-binding protein At3g49725, chloroplastic [Sesamum indicum]           |
| c41705.graph_c0 | 2.503111      | 2.21329545    | 1.60829837    | 21.0232988     | 34.3439211     | 51.7589465     | 3.178E-05 | 3.057802  | up        | PREDICTED: putative phospholipid:diacylglycerol acyltransferase 2 [Sesamum indicum] |
| c41709.graph_c0 | 33.9643868    | 32.2742311    | 32.3710495    | 13.5376021     | 14.8142429     | 19.7231413     | 1.922E-35 | -2.057455 | down      | PREDICTED: B-box zinc finger protein 20 [Sesamum indicum]                           |
| c41713.graph_c0 | 3.26564156    | 3.6899078     | 2.35257139    | 14.9286509     | 13.3522867     | 11.742141      | 5.028E-06 | 1.093835  | up        | PREDICTED: poly(A)-specific ribonuclease PARN [Sesamum indicum]                     |
| c41721.graph_c1 | 0             | 0             | 0             | 2.42536053     | 4.69575503     | 6.25096491     | 1.123E-07 | Inf       | up        | PREDICTED: geraniol synthase, chloroplastic-like [Sesamum indicum]                  |
| c41722.graph_c0 | 1.39038517    | 1.06281186    | 1.03953454    | 9.82810003     | 10.4856969     | 10.7343646     | 4.816E-16 | 2.13545   | up        | PREDICTED: uncharacterized protein LOC105159385 [Sesamum indicum]                   |
| c41723.graph_c0 | 0.62676782    | 0.84882912    | 0.94755467    | 6.31764753     | 7.79025374     | 8.17521502     | 9.373E-17 | 2.176054  | up        | PREDICTED: katanin p80 WD40 repeat-containing subunit B1 homolog [Sesamum indicum]  |
| c41725.graph_c0 | 0             | 0             | 0             | 1.30368377     | 1.7820579      | 1.42194771     | 1.429E-11 | Inf       | up        | similar to AHNAK nucleoprotein [Ectocarpus siliculosus]                             |
| c41728.graph_c0 | 18.5340737    | 20.789308     | 16.0190606    | 73.1962768     | 78.3689661     | 84.5836548     | 2.978E-14 | 1.075902  | up        | PREDICTED: transketolase, chloroplastic [Sesamum indicum]                           |
| c41730.graph_c0 | 2.08370984    | 1.92738144    | 2.03365795    | 6.97391622     | 11.4038057     | 11.4809762     | 3.985E-05 | 1.278231  | up        | PREDICTED: vacuolar amino acid transporter 1-like isoform X1 [Sesamum indicum]      |
| c41730.graph_c1 | 26.2679998    | 26.5593074    | 28.1988165    | 3.25193211     | 4.65078746     | 4.82258272     | 1.57E-108 | -3.695569 | down      | PREDICTED: glucan endo-1,3-beta-glucosidase 5 [Sesamum indicum]                     |
| c41733.graph_c0 | 230.359054    | 237.078221    | 228.966949    | 35.0219516     | 39.7250382     | 35.5381746     | 6.48E-110 | -3.677521 | down      | PREDICTED: protein NLP5-like [Sesamum indicum]                                      |

| #ID             | 0 h-1<br>FPKM | 0 h-2<br>FPKM | 0 h-3<br>FPKM | 48 h-1<br>FPKM | 48 h-2<br>FPKM | 48 h-3<br>FPKM | FDR       | log2FC    | regulated | nr_annotation                                                                   |
|-----------------|---------------|---------------|---------------|----------------|----------------|----------------|-----------|-----------|-----------|---------------------------------------------------------------------------------|
| c41734.graph_c0 | 13.216879     | 12.8711572    | 14.4168318    | 9.67492815     | 8.349522       | 7.18090968     | 1.702E-15 | -1.698715 | down      | hypothetical protein M569_06103, partial [Genlisea aurea]                       |
| c41738.graph_c0 | 8.03273279    | 7.20404582    | 7.15230875    | 1.99093757     | 1.79079363     | 1.88851173     | 4.909E-48 | -2.996216 | down      | hypothetical protein MIMGU_mgv1a0006002mg, partial [Erythranthe guttata]        |
| c41741.graph_c0 | 0.62758698    | 0.80770553    | 0.63365824    | 4.04721843     | 6.343805       | 7.45960914     | 2.123E-06 | 2.083536  | up        | hypothetical protein MIMGU_mgv1a006910mg [Erythranthe guttata]                  |
| c41743.graph_c0 | 9.7521942     | 9.21004664    | 9.96356898    | 4.6350395      | 5.21294973     | 3.92649321     | 2E-22     | -2.088499 | down      | 1-O-acylglucose:anthocyanin-O-acyltransferase- like protein [Gentiana triflora] |
| c41744.graph_c0 | 38.6832684    | 41.8368653    | 33.7146664    | 2.30463651     | 1.31006401     | 1.30041328     | 1.21E-153 | -5.542522 | down      | hypothetical protein MIMGU_mgv1a021012mg [Erythranthe guttata]                  |
| c41745.graph_c1 | 1.69524092    | 1.08604061    | 1.13279488    | 10.4326003     | 10.1917338     | 11.1727896     | 5.244E-07 | 2.007364  | up        | hypothetical protein MIMGU_mgv1a015492mg [Erythranthe guttata]                  |
| c41751.graph_c0 | 0.69692502    | 0.41857373    | 0.53734575    | 2.6966217      | 3.99037217     | 3.19925037     | 0.0014577 | 1.558497  | up        | PREDICTED: protein DA1-related 2 isoform X2 [Sesamum indicum]                   |
| c41751.graph_c1 | 1.30680877    | 0.96387594    | 0.26515279    | 3.61175243     | 5.43725112     | 6.03276435     | 0.0023636 | 1.558817  | up        | hypothetical protein MIMGU_mgv1a005034mg [Erythranthe guttata]                  |
| c41753.graph_c2 | 5.67388346    | 3.27142944    | 4.60801621    | 34.3737484     | 32.2062932     | 35.4598949     | 5.208E-23 | 1.89601   | up        | PREDICTED: omega-amidase, chloroplastic-like isoform X2 [Nicotiana glauca]      |
| c41755.graph_c0 | 84.0368231    | 91.9837531    | 102.920662    | 16.9511583     | 15.8223762     | 10.7904001     | 5.578E-58 | -3.693865 | down      | PREDICTED: protein PHLOEM PROTEIN 2-LIKE A10 [Sesamum indicum]                  |
| c41756.graph_c0 | 90.7807759    | 91.4953694    | 98.8821281    | 65.2648706     | 61.0525748     | 59.3491647     | 1.9E-29   | -1.615464 | down      | PREDICTED: protein DEHYDRATION-INDUCED 19 homolog 4-like [Sesamum indicum]      |
| c41757.graph_c0 | 36.5353333    | 34.9573465    | 36.8026987    | 28.7688854     | 26.5050492     | 24.1685618     | 3.568E-25 | -1.462312 | down      | PREDICTED: uncharacterized protein LOC105168956 [Sesamum indicum]               |
| c41762.graph_c1 | 1.66857317    | 1.33282097    | 1.12623732    | 90.0115085     | 115.210519     | 141.918567     | 1.128E-37 | 5.373985  | up        | PREDICTED: lanC-like protein GCR2 [Sesamum indicum]                             |
| c41766.graph_c0 | 0.13032058    | 0.04348369    | 0.19537829    | 0.60029909     | 0.67834037     | 0.78340903     | 0.004884  | 1.452371  | up        | PREDICTED: uncharacterized protein LOC102666339 [Glycine max]                   |
| c41767.graph_c0 | 12.6033443    | 12.4176004    | 11.3064994    | 9.38375114     | 11.991025      | 12.5731411     | 3.144E-09 | -1.118917 | down      | PREDICTED: uncharacterized protein LOC105162543 [Sesamum indicum]               |
| c41768.graph_c0 | 29.5767065    | 30.7752522    | 24.1738145    | 25.1415605     | 27.8220184     | 27.9212799     | 7.823E-15 | -1.080631 | down      | PREDICTED: ATP-dependent helicase BRM isoform X1 [Sesamum indicum]              |
| c41770.graph_c0 | 17.0092243    | 17.6703419    | 15.4584482    | 15.2318653     | 15.4537291     | 14.2182702     | 3.989E-14 | -1.174958 | down      | PREDICTED: nuclear pore complex protein NUP1 [Sesamum indicum]                  |
| c41771.graph_c0 | 0.44417966    | 0.36378363    | 0.41511887    | 16.591495      | 14.5815483     | 15.0609208     | 2.078E-35 | 4.225247  | up        | PREDICTED: uncharacterized protein LOC105163485 [Sesamum indicum]               |
| c41771.graph_c1 | 0.22919949    | 0.34414349    | 0.34361882    | 9.53710054     | 8.87309808     | 8.64262399     | 3.417E-21 | 3.864356  | up        | PREDICTED: uncharacterized protein LOC105163485 [Sesamum indicum]               |
| c41774.graph_c0 | 13.1246353    | 12.1633644    | 12.8541469    | 5.28799791     | 2.12941238     | 1.23821809     | 1.26E-53  | -3.133702 | down      | hypothetical protein POPTR_0018500510g [Populus trichocarpa]                    |

| #ID             | 0 h-1<br>FPKM | 0 h-2<br>FPKM | 0 h-3<br>FPKM | 48 h-1<br>FPKM | 48 h-2<br>FPKM | 48 h-3<br>FPKM | FDR       | log2FC    | regulated | nr_annotation                                                                           |
|-----------------|---------------|---------------|---------------|----------------|----------------|----------------|-----------|-----------|-----------|-----------------------------------------------------------------------------------------|
| c41776.graph_c0 | 0.22895205    | 0.08333866    | 0.24071927    | 1.03545275     | 1.82822772     | 1.211391       | 0.0002133 | 1.852453  | up        | unnamed protein product [Coffea canephora]                                              |
| c41777.graph_c0 | 0.01365239    | 0.01366606    | 0.03508773    | 2.13817086     | 2.78478086     | 2.89856281     | 1.087E-25 | 5.935822  | up        | PREDICTED: serine/threonine-protein kinase ULK4 [Sesamum indicum]                       |
| c41779.graph_c0 | 2.00547986    | 2.0271693     | 2.22339853    | 13.6575927     | 12.856681      | 12.4103207     | 1.211E-16 | 1.620307  | up        | gtpase-activating protein [Gossypium arboreum]                                          |
| c41780.graph_c0 | 45.7214835    | 52.4199517    | 48.87585      | 10.2168886     | 9.72947686     | 8.72991451     | 1.56E-104 | -3.373843 | down      | PREDICTED: E3 ubiquitin-protein ligase PUB23-like [Sesamum indicum]                     |
| c41780.graph_c1 | 10.6371096    | 11.942759     | 12.3760833    | 3.44310241     | 10.5217774     | 17.7927471     | 0.0066859 | -1.175468 | down      | PREDICTED: E3 ubiquitin-protein ligase PUB23-like [Sesamum indicum]                     |
| c41781.graph_c0 | 0.83671451    | 0.3448745     | 0.8854681     | 5.16913539     | 6.24464368     | 7.06058313     | 5.8E-07   | 2.134496  | up        | PREDICTED: actin-11 [Sesamum indicum]                                                   |
| c41782.graph_c0 | 61.3542228    | 65.5060849    | 60.933056     | 30.9533517     | 28.5912592     | 28.8690467     | 1.202E-48 | -2.102406 | down      | PREDICTED: protein NLR / isoform A1 [Sesamum indicum]                                   |
| c41785.graph_c0 | 4.02981264    | 2.72792591    | 3.53924126    | 15.4644079     | 17.090034      | 16.7308058     | 6.299E-10 | 1.239859  | up        | PREDICTED: heterogeneous nuclear ribonucleoprotein 1 [Sesamum indicum]                  |
| c41786.graph_c0 | 19.7581168    | 21.6576195    | 16.524459     | 7.10798773     | 11.3946805     | 9.13559795     | 1.59E-26  | -2.09024  | down      | PREDICTED: transmembrane protein 45B-like [Sesamum indicum]                             |
| c41791.graph_c0 | 3.84125074    | 4.14471513    | 4.64768244    | 3.17114208     | 3.74894086     | 3.88489855     | 1.438E-06 | -1.248211 | down      | PREDICTED: probable beta-1,3-galactosyltransferase 16 [Sesamum indicum]                 |
| c41795.graph_c0 | 0.2326994     | 0.31057656    | 0.24918996    | 1.78648223     | 1.28694169     | 1.27168092     | 0.0080098 | 1.444777  | up        | PREDICTED: myosin-11-like isoform A1 [Sesamum indicum]                                  |
| c41797.graph_c0 | 0.90058274    | 0.73967962    | 0.77152298    | 27.6133044     | 30.4924794     | 32.9368759     | 1.02E-98  | 4.219466  | up        | PREDICTED: probable acyl-activating enzyme 17, peroxisomal isoform X1 [Sesamum indicum] |
| c41799.graph_c0 | 0             | 0             | 0             | 4.37788642     | 5.96293691     | 5.23098856     | 5.261E-12 | Inf       | up        | NOX2 [Striga asiatica]                                                                  |
| c41799.graph_c1 | 0             | 0             | 0             | 2.99068164     | 4.03798424     | 4.45254365     | 5.975E-29 | Inf       | up        | PREDICTED: respiratory burst oxidase homolog protein A [Sesamum indicum]                |
| c41800.graph_c0 | 0.42404402    | 0.12127675    | 0.31137906    | 84.8283799     | 73.1929892     | 76.5722529     | 4.04E-109 | 7.082491  | up        | PREDICTED: acyl-CoA-binding domain-containing protein 3-like [Sesamum indicum]          |
| c41802.graph_c0 | 156.84102     | 162.890867    | 151.74885     | 118.919612     | 101.553322     | 89.898719      | 3.303E-29 | -1.615987 | down      | PREDICTED: uncharacterized protein LOC105170559 [Sesamum indicum]                       |
| c41805.graph_c0 | 2.68317814    | 2.24735637    | 3.02578726    | 14.9828542     | 16.9948165     | 16.0249169     | 2.834E-08 | 1.571505  | up        | hypothetical protein MIMGU_mgv1a014951mg [Erythranthe guttata]                          |
| c41811.graph_c0 | 3.47575943    | 3.17669728    | 3.49551272    | 16.2193138     | 17.3298847     | 16.7855399     | 4.107E-05 | 1.29151   | up        | PREDICTED: zinc finger SWIM domain-containing protein 7 isoform X2 [Vitis vinifera]     |
| c41815.graph_c0 | 2.04901019    | 2.58824486    | 2.38229168    | 10.6968637     | 14.0460037     | 16.2365968     | 1.406E-07 | 1.521361  | up        | PREDICTED: calcineurin B-like protein 10 isoform X3 [Sesamum indicum]                   |
| c41816.graph_c0 | 0             | 0.02992607    | 0.03841771    | 1.12923288     | 1.45888453     | 1.22534711     | 4.145E-10 | 4.767849  | up        | --                                                                                      |
| c41819.graph_c0 | 13.6183594    | 13.1737778    | 13.4314731    | 13.3895577     | 13.6633934     | 11.0696524     | 9.901E-10 | -1.093621 | down      | PREDICTED: deoxyhypusine synthase [Sesamum indicum]                                     |
| c41820.graph_c0 | 1.08798645    | 1.01128477    | 0.99864691    | 6.12133638     | 6.29519921     | 6.97563449     | 1.305E-05 | 1.628008  | up        | PREDICTED: uncharacterized protein LOC105162931 [Sesamum indicum]                       |

| #ID             | 0 h-1<br>FPKM | 0 h-2<br>FPKM | 0 h-3<br>FPKM | 48 h-1<br>FPKM | 48 h-2<br>FPKM | 48 h-3<br>FPKM | FDR       | log2FC    | regulated | nr_annotation                                                                  |
|-----------------|---------------|---------------|---------------|----------------|----------------|----------------|-----------|-----------|-----------|--------------------------------------------------------------------------------|
| c41824.graph_c0 | 1.03872036    | 0.86646707    | 0.62290517    | 4.78468475     | 6.96114282     | 9.47977441     | 5.164E-05 | 2.048121  | up        | PREDICTED: probable protein phosphatase 2C 53 [Sesamum indicum]                |
| c41826.graph_c0 | 0.53388599    | 0.41566046    | 0.22868821    | 11.0939634     | 10.3053311     | 8.65565942     | 3.151E-15 | 3.665638  | up        | hypothetical protein MIMGU_mgv1a008654mg [Erythranthe guttata]                 |
| c41827.graph_c0 | 0.43734405    | 1.24038228    | 0.65567182    | 3.82764369     | 4.69517558     | 4.54108578     | 0.0040209 | 1.465012  | up        | PREDICTED: agamous-like MADS-box protein AGL15 [Sesamum indicum]               |
| c41836.graph_c0 | 6.96168487    | 5.72978378    | 6.16282803    | 5.04533244     | 4.52959147     | 4.43857983     | 8.573E-10 | -1.442569 | down      | PREDICTED: putative protease Do-like 14 isoform X1 [Sesamum indicum]           |
| c41839.graph_c0 | 13.4470995    | 13.961423     | 12.7390175    | 8.29731027     | 7.84384893     | 7.17781632     | 2.557E-24 | -1.798697 | down      | PREDICTED: putative F-box protein At5g62060 [Sesamum indicum]                  |
| c41840.graph_c0 | 0.98608859    | 0.82914385    | 0.55755167    | 3.37943077     | 5.27390651     | 5.78766123     | 0.000196  | 1.584776  | up        | PREDICTED: probable glycosyltransferase At3g07620 [Sesamum indicum]            |
| c41841.graph_c0 | 4.396981      | 3.37852708    | 4.57594286    | 16.3172494     | 17.1350445     | 17.4887839     | 1.66E-07  | 1.024204  | up        | hypothetical protein MIMGU_mgv1a007444mg [Erythranthe guttata]                 |
| c41843.graph_c0 | 13.0686798    | 12.9281641    | 11.3711247    | 9.64826895     | 9.3725268      | 8.37532647     | 6.566E-24 | -1.462365 | down      | PREDICTED: uncharacterized protein LOC105155405 [Sesamum indicum]              |
| c41844.graph_c0 | 25.3759477    | 27.855275     | 25.542374     | 105.963891     | 123.701339     | 110.688327     | 1.703E-13 | 1.091989  | up        | PREDICTED: ADP-ribosylation factor-like protein 8A [Nicotiana tomentosiformis] |
| c41846.graph_c2 | 3.29210692    | 3.12196118    | 2.95020855    | 14.2067591     | 17.0795977     | 15.9433957     | 2.015E-07 | 1.315045  | up        | PREDICTED: BRCA1-A complex subunit BRE [Sesamum indicum]                       |
| c41847.graph_c0 | 19.6602845    | 17.4562457    | 20.8870115    | 271.139289     | 242.323068     | 314.342714     | 2.687E-36 | 2.816529  | up        | hypothetical protein MIMGU_mgv1a012525mg [Erythranthe guttata]                 |
| c41848.graph_c0 | 35.7417674    | 36.5305289    | 33.8320612    | 7.09792398     | 8.96542629     | 8.25897933     | 6.25E-98  | -3.145666 | down      | PREDICTED: LOW QUALITY PROTEIN: F-box protein SKIP14-like [Sesamum indicum]    |
| c41849.graph_c0 | 3.63086695    | 2.95606221    | 3.48380315    | 4.10318952     | 1.60643783     | 1.9048661      | 0.0002022 | -1.403003 | down      | PREDICTED: uncharacterized protein LOC105177931 [Sesamum indicum]              |
| c41851.graph_c0 | 1.36077476    | 1.2054313     | 0.71183959    | 6.54552507     | 7.14574169     | 6.46581457     | 1.282E-13 | 1.60797   | up        | hypothetical protein MIMGU_mgv1a000152mg [Erythranthe guttata]                 |
| c41852.graph_c0 | 67.6675866    | 76.6758049    | 67.6320772    | 62.8976449     | 67.1741551     | 65.3970148     | 7.502E-16 | -1.134934 | down      | PREDICTED: PHD finger protein ALFIN-LIKE 4-like [Sesamum indicum]              |
| c41853.graph_c0 | 1.08130329    | 1.04075582    | 1.22918859    | 8.92718996     | 9.90375609     | 12.3411858     | 2.504E-11 | 2.194837  | up        | PREDICTED: homogentisate solanesyltransferase, chloroplastic [Sesamum indicum] |
| c41856.graph_c0 | 40.1971167    | 40.5042826    | 44.1165282    | 31.6892507     | 29.8625032     | 32.4592275     | 4.612E-19 | -1.426851 | down      | PREDICTED: uncharacterized protein LOC105160829 [Sesamum indicum]              |
| c41857.graph_c0 | 21.0082901    | 17.8420694    | 19.5724513    | 4.71758799     | 6.47139687     | 10.0905803     | 5.883E-47 | -2.483086 | down      | PREDICTED: monoglyceride lipase-like [Sesamum indicum]                         |
| c41859.graph_c0 | 10.1745242    | 11.2696818    | 10.8281602    | 5.28262336     | 4.8114521      | 5.61760679     | 2.685E-23 | -2.055594 | down      | PREDICTED: probable microtubule-binding protein TANGLED [Sesamum indicum]      |

| #ID             | 0 h-1<br>FPKM | 0 h-2<br>FPKM | 0 h-3<br>FPKM | 48 h-1<br>FPKM | 48 h-2<br>FPKM | 48 h-3<br>FPKM | FDR       | log2FC    | regulated | nr_annotation                                                                             |
|-----------------|---------------|---------------|---------------|----------------|----------------|----------------|-----------|-----------|-----------|-------------------------------------------------------------------------------------------|
| c41862.graph_c0 | 11.1015496    | 11.4808569    | 10.6349936    | 10.2120688     | 10.1494344     | 8.20949594     | 7.841E-16 | -1.2325   | down      | PREDICTED: G patch domain-containing protein 1 [Sesamum indicum]                          |
| c41876.graph_c1 | 30.6039797    | 26.5602583    | 29.5078302    | 151.124719     | 133.752548     | 130.661146     | 1.829E-15 | 1.246405  | up        | PREDICTED: phospho-2-dehydro-3-deoxyheptonate aldolase 1, chloroplastic [Sesamum indicum] |
| c41879.graph_c0 | 3.7606396     | 1.5724731     | 1.65163811    | 0.08771004     | 0.78980427     | 1.24870182     | 0.0035405 | -2.751519 | down      | PREDICTED: heat shock cognate 70 kDa protein 2-like [Elaeis guineensis]                   |
| c41882.graph_c0 | 0.5052771     | 0.39338682    | 0.64930108    | 3.87911852     | 4.8765541      | 4.92430597     | 5.374E-08 | 2.117987  | up        | hypothetical protein MIMGU_mgv1a004014mg [Erythranthe guttata]                            |
| c41887.graph_c0 | 0.88975544    | 0.68822676    | 0.46774267    | 0.42847994     | 0.25656491     | 0.14918825     | 2.95E-06  | -2.290959 | down      | hypothetical protein VITISV_000584 [Vitis vinifera]                                       |
| c41892.graph_c0 | 0.09631117    | 0.04820381    | 0             | 14.3295939     | 14.3344969     | 16.6978745     | 1.016E-42 | 7.29358   | up        | PREDICTED: tetraspanin-10 [Nicotiana glauca]                                              |
| c41894.graph_c0 | 0.07892394    | 0.39501485    | 0.20284077    | 6.25304969     | 5.70002031     | 5.82271327     | 6.264E-10 | 3.698754  | up        | PREDICTED: pleckstrin homology domain-containing family A member 8-like [Sesamum indicum] |
| c41896.graph_c0 | 1.39901912    | 1.56517532    | 1.00465012    | 5.79990449     | 6.42540709     | 5.66667309     | 0.0029284 | 1.157812  | up        | PREDICTED: eukaryotic translation initiation factor 1A-like [Cucumis sativus]             |
| c41898.graph_c0 | 0             | 0.10765532    | 0.02303383    | 2.03113779     | 2.50162131     | 2.80644871     | 3.62E-17  | 4.793112  | up        | PREDICTED: kinesin-3-like [Sesamum indicum]                                               |
| c41899.graph_c0 | 40.9931655    | 47.5692925    | 42.5324788    | 245.546192     | 240.233525     | 190.171394     | 2.207E-10 | 1.351273  | up        | hypothetical protein AALP_AA7G017200 [Arabis alpina]                                      |
| c41900.graph_c2 | 14.246858     | 15.5889754    | 14.6769047    | 4.91275996     | 6.18840378     | 6.56789039     | 2.655E-55 | -2.355083 | down      | PREDICTED: LRR receptor-like serine/threonine-protein kinase RPK2 [Sesamum indicum]       |
| c41900.graph_c3 | 53.1642155    | 52.1606176    | 52.4294853    | 56.3920992     | 44.4905974     | 34.1567554     | 3.632E-15 | -1.234738 | down      | PREDICTED: heat stress transcription factor A-4b-like [Sesamum indicum]                   |
| c41909.graph_c0 | 1.24568401    | 0.73348904    | 0.28248587    | 1537.85868     | 1369.50518     | 1605.15998     | 1.91E-284 | 9.957254  | up        | hypothetical protein MIMGU_mgv1a015091mg [Erythranthe guttata]                            |
| c41910.graph_c0 | 101.022111    | 101.512477    | 95.7505618    | 64.2163778     | 75.2739827     | 75.0171242     | 5.662E-26 | -1.495455 | down      | hypothetical protein MIMGU_mgv1a007193mg [Erythranthe guttata]                            |
| c41912.graph_c0 | 1.33830157    | 0.79386173    | 0.89173285    | 0.913282       | 0.72563365     | 0.85326447     | 0.0087936 | -1.290478 | down      | hypothetical protein MIMGU_mgv1a009757mg [Erythranthe guttata]                            |
| c41915.graph_c0 | 13.7134237    | 13.37176      | 13.0598866    | 8.76999587     | 10.5251821     | 10.5683624     | 1.197E-19 | -1.447276 | down      | PREDICTED: zinc finger BED domain-containing protein RICESLEEPER 1-like [Sesamum indicum] |
| c41918.graph_c0 | 18.5711946    | 15.2824048    | 17.4227099    | 15.324622      | 15.6786001     | 16.3442287     | 2.04E-05  | -1.133195 | down      | PREDICTED: uncharacterized protein At4g28440 [Vitis vinifera]                             |
| c41920.graph_c0 | 3.86166378    | 4.26541313    | 4.27792314    | 1.10408789     | 0.90972564     | 0.98241077     | 6E-12     | -3.064632 | down      | -                                                                                         |
| c41924.graph_c0 | 8.26105437    | 8.10459895    | 7.44373554    | 3.82047166     | 5.30007038     | 5.28800644     | 4.918E-15 | -1.74694  | down      | PREDICTED: ABC transporter C family member 5-like [Sesamum indicum]                       |
| c41925.graph_c0 | 68.3496947    | 72.5522755    | 68.8982057    | 61.4599766     | 63.2574246     | 63.1047511     | 5.507E-17 | -1.177453 | down      | hypothetical protein MIMGU_mgv1a014620mg [Erythranthe guttata]                            |
| c41925.graph_c1 | 2.53734641    | 2.53988718    | 2.71715883    | 0.38959484     | 0.68788081     | 0.92442438     | 4.747E-08 | -2.990703 | down      | -                                                                                         |
| c41927.graph_c0 | 1.11476237    | 1.56920433    | 1.611578      | 7.70243853     | 6.18784807     | 5.85410256     | 0.0003592 | 1.185408  | up        | hypothetical protein MIMGU_mgv1a006603mg [Erythranthe guttata]                            |

| #ID             | 0 h-1<br>FPKM | 0 h-2<br>FPKM | 0 h-3<br>FPKM | 48 h-1<br>FPKM | 48 h-2<br>FPKM | 48 h-3<br>FPKM | FDR       | log2FC    | regulated | nr_annotation                                                                                               |
|-----------------|---------------|---------------|---------------|----------------|----------------|----------------|-----------|-----------|-----------|-------------------------------------------------------------------------------------------------------------|
| c41932.graph_c0 | 3.35247379    | 3.29919229    | 3.07199325    | 24.7732987     | 24.90517       | 25.1391429     | 6.743E-36 | 1.9271    | up        | PREDICTED: kinesin-like calmodulin-binding protein homolog [Sesamum indicum]                                |
| c41936.graph_c0 | 2.1474924     | 3.15512087    | 1.86941509    | 1.18066407     | 2.73817309     | 2.41342061     | 0.003392  | -1.207348 | down      | PREDICTED: cyclic nucleotide-gated ion channel 4 [Sesamum indicum]                                          |
| c41938.graph_c0 | 0             | 0.06870519    | 0             | 1.16979913     | 1.27275386     | 1.18153972     | 2.287E-09 | 4.71427   | up        | PREDICTED: uncharacterized protein LOC104906987 [Beta vulgaris subsp. vulgaris]                             |
| c41939.graph_c0 | 15.1215216    | 14.5021926    | 13.7884003    | 11.4700788     | 11.8860415     | 10.4657964     | 3.156E-13 | -1.37645  | down      | PREDICTED: phosphatidylinositol/phosphatidylcholine transfer protein SFH8-like isoform X2 [Sesamum indicum] |
| c41941.graph_c0 | 0             | 0             | 0             | 25.1304543     | 42.3843489     | 21.1371948     | 1.997E-14 | Inf       | up        | 60S ribosomal protein L35 [Galdieria sulphuraria]                                                           |
| c41943.graph_c0 | 19.9312612    | 20.1256182    | 20.1496624    | 16.3716936     | 18.5340866     | 16.938213      | 9.456E-15 | -1.234951 | down      | PREDICTED: uncharacterized protein LOC105176972 [Sesamum indicum]                                           |
| c41944.graph_c0 | 24.0428783    | 9.7337457     | 15.2420516    | 0              | 0              | 0              | 3.545E-15 | -Inf      | down      | --                                                                                                          |
| c41954.graph_c0 | 49.0201818    | 50.2668909    | 48.1735337    | 19.8706591     | 20.7262002     | 22.421098      | 8.677E-54 | -2.245039 | down      | PREDICTED: pheophorbide a oxygenase, chloroplastic-like [Citrus sinensis]                                   |
| c41957.graph_c0 | 0.18666452    | 0.18685144    | 0.3198284     | 1.31841775     | 1.76106123     | 1.63216721     | 0.0013176 | 1.736051  | up        | PREDICTED: RING-H2 finger protein ATL39-like [Sesamum indicum]                                              |
| c41961.graph_c0 | 141.998008    | 118.799433    | 141.841033    | 123.435631     | 106.10572      | 95.2747706     | 9.461E-15 | -1.324057 | down      | PREDICTED: transcription factor HY5 [Sesamum indicum]                                                       |
| c41963.graph_c0 | 6.52687248    | 5.02569858    | 4.70978567    | 4.44035494     | 4.01801506     | 4.77412635     | 2.184E-05 | -1.311746 | down      | PREDICTED: lachrymatory-factor synthase-like [Sesamum indicum]                                              |
| c41966.graph_c0 | 0.34811046    | 0.34845904    | 0.33550179    | 2.16473891     | 2.71795957     | 1.71215259     | 0.0030432 | 1.657455  | up        | PREDICTED: uncharacterized protein LOC105157153 [Sesamum indicum]                                           |
| c41968.graph_c0 | 5.08219914    | 5.45952879    | 6.05296171    | 0.05709821     | 0.12097726     | 0              | 1.048E-36 | -7.566229 | down      | -                                                                                                           |
| c41974.graph_c0 | 0.41854669    | 0.37706922    | 0.32270944    | 1.92796253     | 2.45093103     | 2.98495168     | 0.0009983 | 1.698252  | up        | unnamed protein product [Coffea canephora]                                                                  |
| c41976.graph_c0 | 13.7249927    | 12.3799601    | 14.0192803    | 64.7039153     | 69.0856844     | 65.4034335     | 8.758E-17 | 1.292726  | up        | hypothetical protein JCGZ_26392 [Jatropha curcas]                                                           |
| c41981.graph_c1 | 63.2914967    | 67.4521272    | 57.6906595    | 38.8320542     | 39.6504304     | 39.5676422     | 4.862E-33 | -1.69123  | down      | PREDICTED: homeobox-leucine zipper protein ANTHOCYANINLESS 2-like [Sesamum indicum]                         |
| c41985.graph_c0 | 0.06753857    | 0.1014093     | 0.08678973    | 4.60434912     | 4.97662289     | 5.86856417     | 5.055E-19 | 4.895666  | up        | PREDICTED: probable GABA transporter 2 [Sesamum indicum]                                                    |
| c41988.graph_c0 | 13.3213072    | 16.58585      | 17.6023197    | 6.41810474     | 7.62613393     | 8.68194579     | 1.366E-16 | -2.087609 | down      | hypothetical protein MIMGU_mgv1a002241mg [Erythranthe guttata]                                              |
| c41989.graph_c0 | 0.38546974    | 0.16077322    | 0.04127866    | 2.16031253     | 3.66801279     | 4.00245796     | 1.517E-07 | 3.052262  | up        | PREDICTED: transcription factor bHLH18-like [Sesamum indicum]                                               |
| c41994.graph_c0 | 66.2339926    | 66.5577929    | 61.4385831    | 46.9787629     | 48.2620742     | 47.8897739     | 2.666E-25 | -1.457482 | down      | PREDICTED: neurofilament medium polypeptide [Sesamum indicum]                                               |
| c41997.graph_c0 | 2.00293685    | 2.0806007     | 2.71954295    | 25.9029365     | 42.4155557     | 47.7694131     | 7.644E-11 | 3.06277   | up        | unnamed protein product [Coffea canephora]                                                                  |
| c41999.graph_c0 | 4.73631583    | 6.77294076    | 5.73856174    | 38.0862754     | 39.1591486     | 43.3734045     | 1.484E-17 | 1.786693  | up        | -                                                                                                           |



| #ID             | 0 h-1<br>FPKM | 0 h-2<br>FPKM | 0 h-3<br>FPKM | 48 h-1<br>FPKM | 48 h-2<br>FPKM | 48 h-3<br>FPKM | FDR       | log2FC    | regulated | nr_annotation                                                                                     |
|-----------------|---------------|---------------|---------------|----------------|----------------|----------------|-----------|-----------|-----------|---------------------------------------------------------------------------------------------------|
| c41999.graph_c1 | 5.80139966    | 7.43322737    | 6.73082551    | 46.5746134     | 47.0753614     | 46.6594028     | 1.408E-29 | 1.794907  | up        | PREDICTED: uncharacterized protein LOC105156173 isoform X1 [Sesamum indicum]                      |
| c42000.graph_c0 | 12.0752577    | 11.8249882    | 12.5340356    | 56.8471339     | 67.8601046     | 66.1129493     | 8.552E-23 | 1.367789  | up        | hypothetical protein MIMGU_mgv1a002552mg [Erythranthe guttata]                                    |
| c42001.graph_c0 | 47.2488427    | 49.0984337    | 45.555003     | 34.4937427     | 35.5701485     | 31.7768988     | 1.179E-25 | -1.495201 | down      | PREDICTED: ubiquitin-activating enzyme E1 1 [Sesamum indicum]                                     |
| c42002.graph_c0 | 3.24942901    | 2.11139061    | 1.75816629    | 0              | 0              | 0              | 4.048E-18 | -Inf      | down      | predicted protein [Hordeum vulgare subsp. vulgare]                                                |
| c42004.graph_c0 | 95.13054      | 94.1304626    | 93.8600093    | 60.2016233     | 57.5355184     | 55.4170815     | 6.288E-34 | -1.725488 | down      | PREDICTED: uncharacterized protein At1g04910-like [Sesamum indicum]                               |
| c42005.graph_c0 | 4.10026854    | 3.22753073    | 3.28115461    | 2.14626978     | 3.52880194     | 3.62086315     | 3.357E-07 | -1.215365 | down      | PREDICTED: chromatin assembly factor 1 subunit FAS1-like [Sesamum indicum]                        |
| c42006.graph_c0 | 116.269162    | 112.846983    | 116.559007    | 71.7275538     | 76.4073914     | 82.4818878     | 2.845E-29 | -1.603271 | down      | PREDICTED: 50S ribosomal protein L1, chloroplastic [Sesamum indicum]                              |
| c42007.graph_c0 | 9.85294818    | 8.82462342    | 9.66266912    | 7.64393981     | 4.85869641     | 5.35620619     | 4.808E-11 | -1.675424 | down      | PREDICTED: phytochromobilin:ferredoxin oxidoreductase, chloroplastic isoform X1 [Sesamum indicum] |
| c42013.graph_c0 | 44.9178524    | 45.2853762    | 40.2475068    | 28.1713137     | 35.6619591     | 38.8282385     | 6.24E-22  | -1.36679  | down      | PREDICTED: CBL-interacting protein kinase 18 [Sesamum indicum]                                    |
| c42014.graph_c0 | 0             | 0             | 0             | 1.24249158     | 2.02141337     | 1.77679533     | 9.713E-12 | Inf       | up        | hypothetical protein MIMGU_mgv1a013619mg [Erythranthe guttata]                                    |
| c42015.graph_c1 | 3.90010917    | 4.25646029    | 2.47109321    | 2.66982458     | 3.88568453     | 3.5966935      | 0.00081   | -1.084959 | down      | PREDICTED: exocyst complex component EXO70A1-like isoform X1 [Sesamum indicum]                    |
| c42016.graph_c1 | 2.02107492    | 1.9545191     | 2.2890235     | 0.53649293     | 0.90267226     | 0.8985754      | 1.482E-08 | -2.450157 | down      | PREDICTED: uncharacterized protein LOC105163887 isoform X1 [Sesamum indicum]                      |
| c42018.graph_c0 | 1.83423134    | 1.29937123    | 1.23292364    | 9.59294152     | 11.5946804     | 11.7973666     | 5.471E-13 | 1.899251  | up        | PREDICTED: GPI transamidase component PIG-S [Sesamum indicum]                                     |
| c42019.graph_c0 | 2.11082769    | 2.65241576    | 2.53935904    | 19.322196      | 19.5052207     | 18.9967265     | 3.421E-15 | 1.966736  | up        | PREDICTED: uncharacterized protein LOC105165798 [Sesamum indicum]                                 |
| c42024.graph_c0 | 13.8284968    | 14.5289681    | 16.0072525    | 6.09180729     | 8.89034167     | 10.4360598     | 1.346E-25 | -1.830236 | down      | PREDICTED: transmembrane protein 04-like [Sesamum indicum]                                        |
| c42029.graph_c1 | 6.9755975     | 5.4582159     | 6.56512374    | 34.2589167     | 36.724659      | 35.5974983     | 3.033E-15 | 1.469224  | up        | PREDICTED: vesicle-associated membrane protein 724 [Nicotiana glauca]                             |
| c42030.graph_c0 | 2.16296909    | 0.88372856    | 1.07776566    | 0              | 0              | 0              | 6.398E-09 | -Inf      | down      | --                                                                                                |
| c42033.graph_c0 | 1.86908674    | 1.48456477    | 1.7491737     | 7.33689618     | 8.44670176     | 7.94390701     | 5.245E-07 | 1.19744   | up        | PREDICTED: protein ROOT PRIMORDIUM DEFECTIVE 1 [Sesamum indicum]                                  |
| c42041.graph_c0 | 5.26157556    | 6.01925055    | 4.24998068    | 1.59268645     | 2.34748963     | 1.54039438     | 5.224E-10 | -2.522037 | down      | PREDICTED: probable LRR receptor-like serine/threonine-protein kinase RLK [Sesamum indicum]       |
| c42043.graph_c0 | 39.3487022    | 40.7362088    | 39.7293602    | 35.0638157     | 29.6595414     | 29.8795905     | 1.44E-21  | -1.354958 | down      | PREDICTED: probable zinc metalloprotease EGY1, chloroplastic [Sesamum indicum]                    |

| #ID             | 0 h-1<br>FPKM | 0 h-2<br>FPKM | 0 h-3<br>FPKM | 48 h-1<br>FPKM | 48 h-2<br>FPKM | 48 h-3<br>FPKM | FDR       | log2FC    | regulated | nr_annotation                                                                                    |
|-----------------|---------------|---------------|---------------|----------------|----------------|----------------|-----------|-----------|-----------|--------------------------------------------------------------------------------------------------|
| c42048.graph_c0 | 0.49804745    | 0.565019      | 0.34133904    | 6.57661779     | 8.81422844     | 7.43046951     | 3.646E-15 | 3.004856  | up        | PREDICTED: probable glucan 1,3-beta-glucosidase A [Beta vulgaris subsp. vulgaris]                |
| c42052.graph_c0 | 14.4849852    | 12.5634783    | 13.8545745    | 0.56865823     | 0.6827477      | 0.40479094     | 5.672E-97 | -5.64382  | down      | PREDICTED: homeobox-leucine zipper protein HOX11-like [Sesamum indicum]                          |
| c42061.graph_c0 | 0.56910493    | 0.55068564    | 0.51192566    | 4.73614578     | 4.99885788     | 5.53598921     | 6.864E-12 | 2.208115  | up        | PREDICTED: putative ion channel POLLUX-like 2 isoform X4 [Sesamum indicum]                       |
| c42066.graph_c1 | 4.25717172    | 3.92998972    | 3.55591224    | 19.8931757     | 20.5435079     | 22.1405758     | 1.731E-15 | 1.39685   | up        | PREDICTED: uncharacterized protein LOC105165741 [Sesamum indicum]                                |
| c42067.graph_c0 | 0             | 0             | 0             | 2.8276737      | 2.13146854     | 2.27411945     | 2.956E-12 | Inf       | up        | -                                                                                                |
| c42073.graph_c0 | 0.33216219    | 0.53199168    | 0.2987891     | 2.63168149     | 2.30167753     | 2.15105459     | 0.0013986 | 1.595603  | up        | PREDICTED: protein OBERON 2 isoform X2 [Sesamum indicum]                                         |
| c42075.graph_c0 | 16.8105268    | 15.0266462    | 17.1382708    | 138.753962     | 154.621136     | 151.073687     | 2.308E-48 | 2.161936  | up        | PREDICTED: ATP synthase subunit d, mitochondrial [Sesamum indicum]                               |
| c42077.graph_c0 | 0.15866533    | 0.03970605    | 0             | 1.86370385     | 3.05833513     | 3.80436393     | 9.8E-09   | 4.451081  | up        | PREDICTED: high-affinity nitrate transporter 3.1-like [Sesamum indicum]                          |
| c42079.graph_c0 | 0.82334184    | 1.06766997    | 0.72138195    | 5.24065743     | 6.97632663     | 7.13271067     | 1.727E-11 | 1.868404  | up        | PREDICTED: uncharacterized protein LOC105156622 [Sesamum indicum]                                |
| c42083.graph_c0 | 3.31687134    | 2.95128239    | 2.55010059    | 24.7330355     | 25.4546145     | 28.002961      | 7.337E-31 | 2.132091  | up        | PREDICTED: imidazole glycerol phosphate synthase hisHF, chloroplastic [Sesamum indicum]          |
| c42091.graph_c0 | 15.2817122    | 14.8003582    | 13.3892763    | 254.083585     | 310.653649     | 318.570156     | 4.58E-99  | 3.324722  | up        | PREDICTED: calnexin homolog 1 [Sesamum indicum]                                                  |
| c42092.graph_c0 | 1.93549567    | 2.2572044     | 2.36645126    | 15.4074109     | 16.6157179     | 17.1598827     | 2.132E-25 | 1.885894  | up        | PREDICTED: protein FAL1 homolog 1-like [Sesamum indicum]                                         |
| c42095.graph_c0 | 0             | 0             | 0             | 1.66884173     | 3.97785478     | 2.82135814     | 4.408E-07 | Inf       | up        | -                                                                                                |
| c42096.graph_c0 | 27.0197639    | 26.7402737    | 26.9114068    | 11.2634171     | 14.1393414     | 12.4745473     | 4.004E-46 | -2.111535 | down      | PREDICTED: uncharacterized protein LOC105170420 [Sesamum indicum]                                |
| c42097.graph_c0 | 4.29819141    | 2.34921528    | 2.91415808    | 0              | 0              | 0              | 1.632E-24 | -Inf      | down      | predicted protein [Hordeum vulgare subsp. vulgare]                                               |
| c42099.graph_c0 | 11.5852891    | 12.1767345    | 11.3517608    | 136.08233      | 107.698038     | 106.958628     | 1.797E-15 | 2.308041  | up        | --                                                                                               |
| c42100.graph_c0 | 1.99919642    | 2.08635569    | 2.15909231    | 50.198578      | 54.0926123     | 57.5676929     | 6.85E-113 | 3.675981  | up        | PREDICTED: 4-hydroxy-3-methylbut-2-en-1-yl diphosphate synthase, chloroplastic [Sesamum indicum] |
| c42109.graph_c0 | 3.86010652    | 3.42488412    | 3.45724131    | 14.170846      | 16.667641      | 16.2528376     | 4.954E-08 | 1.112628  | up        | PREDICTED: probable beta-1,3-galactosyltransferase 20 [Sesamum indicum]                          |
| c42109.graph_c1 | 2.43700469    | 1.14186787    | 1.46587756    | 10.4135709     | 15.02972       | 14.4939591     | 1.04E-09  | 1.964363  | up        | hypothetical protein MIMGU_mgv1a002479mg [Erythranthe guttata]                                   |
| c42114.graph_c0 | 30.5710525    | 32.5541932    | 30.1252146    | 21.9522056     | 25.8644749     | 26.0077304     | 8.672E-22 | -1.357156 | down      | PREDICTED: cryptochrome-1 [Sesamum indicum]                                                      |
| c42117.graph_c0 | 28.7682554    | 30.5436298    | 27.6168865    | 129.359891     | 161.878394     | 174.774754     | 2.898E-17 | 1.401009  | up        | PREDICTED: monosaccharide-sensing protein 2-like [Sesamum indicum]                               |
| c42120.graph_c0 | 9.24910311    | 8.30060283    | 7.45915307    | 358.464483     | 304.67128      | 257.050017     | 3.425E-28 | 4.190508  | up        | PREDICTED: chaperone protein dnaJ 11, chloroplastic-like [Sesamum indicum]                       |

| #ID             | 0 h-1<br>FPKM | 0 h-2<br>FPKM | 0 h-3<br>FPKM | 48 h-1<br>FPKM | 48 h-2<br>FPKM | 48 h-3<br>FPKM | FDR       | log2FC    | regulated | nr_annotation                                                                                               |
|-----------------|---------------|---------------|---------------|----------------|----------------|----------------|-----------|-----------|-----------|-------------------------------------------------------------------------------------------------------------|
| c42122.graph_c0 | 69.1541318    | 62.415697     | 65.9593961    | 51.4422893     | 42.9686843     | 40.9023188     | 7.965E-26 | -1.559048 | down      | PREDICTED: cyclic dof factor 1 [Sesamum indicum]                                                            |
| c42123.graph_c1 | 42.254896     | 39.1095922    | 41.3933141    | 220.309722     | 250.425127     | 264.251811     | 3.788E-29 | 1.561595  | up        | PREDICTED: elongation factor 1-delta-like [Sesamum indicum]                                                 |
| c42128.graph_c0 | 156.365536    | 164.873214    | 150.780296    | 152.369268     | 149.846181     | 147.495259     | 2.241E-14 | -1.086215 | down      | PREDICTED: glycine-rich RNA-binding protein 2, mitochondrial-like [Sesamum indicum]                         |
| c42129.graph_c1 | 0.19090324    | 0.34396992    | 0.34344551    | 6.40175953     | 5.29136314     | 5.38326652     | 1.025E-12 | 3.263694  | up        | PREDICTED: cytochrome P450 90A1 [Sesamum indicum]                                                           |
| c42134.graph_c1 | 47.2791889    | 46.4541533    | 48.4365157    | 13.8498175     | 15.948046      | 17.1457174     | 1.915E-24 | -2.619564 | down      | /U KDa neat shock protein-like protein, partial [Aracmis diocoid]                                           |
| c42138.graph_c0 | 0.49482988    | 0.2251479     | 0.28903454    | 6.23712444     | 7.79287161     | 8.03884897     | 2.168E-24 | 3.432793  | up        | PREDICTED: LOW QUALITY PROTEIN: putative kinase-like protein TMKL1 [Sesamum indicum]                        |
| c42144.graph_c1 | 81.6563307    | 82.959765     | 87.2424157    | 37.1036874     | 27.5341907     | 28.9430653     | 6.738E-64 | -2.440816 | down      | hypothetical protein MIMGU_mgv1a005576mg [Erythranthe guttata]                                              |
| c42147.graph_c0 | 38.616984     | 36.8917054    | 38.0431809    | 21.1046942     | 21.7190683     | 21.0900706     | 2.268E-32 | -1.846907 | down      | PREDICTED: F-box protein CFK30-like [Sesamum indicum]                                                       |
| c42150.graph_c0 | 79.1508207    | 80.669379     | 73.952322     | 61.7855201     | 64.1846076     | 58.9333369     | 3.462E-22 | -1.355036 | down      | PREDICTED: LOW QUALITY PROTEIN: cleavage and polyadenylation specificity factor subunit 6 [Sesamum indicum] |
| c42152.graph_c2 | 53.1071726    | 51.3777763    | 50.1919797    | 32.3012304     | 28.580401      | 21.799377      | 1.487E-40 | -1.916034 | down      | PREDICTED: shaggy-related protein kinase alpha [Sesamum indicum]                                            |
| c42157.graph_c0 | 6.90854159    | 6.42950824    | 6.28640637    | 6.48501046     | 6.05004589     | 6.90295971     | 8.575E-09 | -1.030149 | down      | PREDICTED: uncharacterized protein LOC105167143 isoform X1 [Sesamum indicum]                                |
| c42159.graph_c0 | 13.3463733    | 13.6369107    | 11.6353779    | 117.77708      | 128.364748     | 145.926377     | 1.653E-59 | 2.325245  | up        | PREDICTED: serine/threonine-protein kinase SRK2E isoform X1 [Sesamum indicum]                               |
| c42160.graph_c0 | 11.4390648    | 13.8611549    | 12.2681299    | 8.87445271     | 10.5765824     | 9.65903168     | 4.151E-07 | -1.388059 | down      | -                                                                                                           |
| c42163.graph_c0 | 109.164041    | 99.6404399    | 111.103397    | 11.0819873     | 8.95176664     | 8.75135855     | 1.99E-128 | -4.487758 | down      | -                                                                                                           |
| c42163.graph_c1 | 117.671901    | 119.655907    | 113.345388    | 15.106806      | 12.3256875     | 8.72576144     | 2.47E-162 | -4.287894 | down      | PREDICTED: BAG family molecular chaperone regulator 6 [Sesamum indicum]                                     |
| c42164.graph_c0 | 1.44810974    | 2.07079972    | 1.68365184    | 0.69881069     | 0.94220661     | 1.13054101     | 0.000119  | -1.932739 | down      | -                                                                                                           |
| c42171.graph_c0 | 131.356436    | 174.77254     | 108.555958    | 1509.4964      | 1078.22573     | 725.600417     | 0.0011864 | 1.993823  | up        | PREDICTED: glyceraldehyde-3-phosphate dehydrogenase, cytosolic [Sesamum indicum]                            |
| c42173.graph_c0 | 1.67635       | 2.30728934    | 1.11555549    | 0.63429193     | 1.02254081     | 0.66254378     | 5.112E-05 | -2.155033 | down      | PREDICTED: rop guanine nucleotide exchange factor 12-like [Sesamum indicum]                                 |
| c42176.graph_c0 | 3.35393568    | 3.28430949    | 3.65407968    | 13.0311669     | 14.8011741     | 16.3167511     | 0.0007013 | 1.07923   | up        | ribosomal protein L7Ae/L30e/S12e/Gadd45 family protein [Medicago truncatula]                                |
| c42178.graph_c0 | 9.02368383    | 8.27999304    | 11.0160014    | 7.75899237     | 9.54073667     | 7.39704081     | 0.0021576 | -1.219688 | down      | -                                                                                                           |
| c42181.graph_c0 | 0.42933367    | 0.64464537    | 0.27585538    | 4.74636216     | 5.02819518     | 4.92716526     | 3.465E-05 | 2.432359  | up        | -                                                                                                           |
| c42181.graph_c1 | 7.0167447     | 6.37741163    | 5.4211404     | 27.3641423     | 28.9469777     | 27.2420331     | 3.352E-09 | 1.135134  | up        | PREDICTED: ethanolamine-phosphate cytidylyltransferase [Sesamum indicum]                                    |
| c42184.graph_c0 | 52.8714781    | 48.6642508    | 47.0475165    | 41.8723518     | 41.5363385     | 40.8359438     | 3.173E-18 | -1.274257 | down      | hypothetical protein MIMGU_mgv1a003601mg [Erythranthe guttata]                                              |

| #ID             | 0 h-1<br>FPKM | 0 h-2<br>FPKM | 0 h-3<br>FPKM | 48 h-1<br>FPKM | 48 h-2<br>FPKM | 48 h-3<br>FPKM | FDR       | log2FC    | regulated | nr_annotation                                                                         |
|-----------------|---------------|---------------|---------------|----------------|----------------|----------------|-----------|-----------|-----------|---------------------------------------------------------------------------------------|
| c42189.graph_c0 | 0.02244671    | 0.06740755    | 0.11537963    | 9.49183098     | 12.5528745     | 13.8002845     | 1.978E-50 | 6.412904  | up        | PREDICTED: uncharacterized protein At1g04910 [Sesamum indicum]                        |
| c42192.graph_c2 | 3.42697869    | 3.04310591    | 3.12527976    | 44.9640163     | 50.1693641     | 56.8187135     | 1.956E-50 | 2.965271  | up        | PREDICTED: rac-like GTP-binding protein ARAC7 isoform X3 [Sesamum indicum]            |
| c42204.graph_c0 | 0             | 0             | 0             | 9.9003417      | 17.9195574     | 17.7070643     | 7.499E-23 | Inf       | up        | PREDICTED: probable 2-oxoglutarate-dependent dioxygenase AOP1 [Sesamum indicum]       |
| c42207.graph_c0 | 0             | 0             | 0             | 19.5269654     | 27.7501187     | 28.3932541     | 8.885E-31 | Inf       | up        | -                                                                                     |
| c42210.graph_c0 | 10.3724751    | 12.7522064    | 11.3335597    | 40.9871622     | 55.2509611     | 59.0986662     | 3.315E-08 | 1.14902   | up        | PREDICTED: cellulose synthase-like protein D3 isoform X1 [Sesamum indicum]            |
| c42211.graph_c0 | 1.28695203    | 1.53130501    | 1.84100518    | 4.87671821     | 6.77779542     | 7.42453855     | 0.000224  | 1.006512  | up        | PREDICTED: uncharacterized protein LOC105176468 [Sesamum indicum]                     |
| c42219.graph_c0 | 191.547767    | 182.752306    | 196.438422    | 106.213725     | 108.311278     | 132.201614     | 3.441E-27 | -1.738863 | down      | PREDICTED: uncharacterized protein LOC105161471 [Sesamum indicum]                     |
| c42226.graph_c0 | 2.82484639    | 3.33261702    | 2.56695647    | 22.8456417     | 22.2920065     | 21.7834529     | 4.47E-29  | 1.924223  | up        | PREDICTED: uncharacterized protein LOC105161471 [Sesamum indicum]                     |
| c42227.graph_c0 | 5.48431191    | 5.06281889    | 4.62006576    | 19.1714527     | 23.0158244     | 22.6532789     | 4.188E-09 | 1.076749  | up        | PREDICTED: serine/threonine-protein kinase CDL1 [Sesamum indicum]                     |
| c42229.graph_c0 | 58.4229465    | 54.4847262    | 54.6657454    | 38.3793358     | 34.755786      | 27.9165994     | 2.75E-35  | -1.742993 | down      | PREDICTED: zinc finger CCCH domain-containing protein 17 isoform X1 [Sesamum indicum] |
| c42233.graph_c2 | 2.87116539    | 2.10762965    | 1.47582448    | 13.2255242     | 13.6372168     | 9.57130005     | 0.0039941 | 1.487132  | up        | PREDICTED: probable serine/threonine protein kinase IREH1 [Sesamum indicum]           |
| c42237.graph_c1 | 132.721667    | 131.735007    | 135.459963    | 66.2019674     | 57.4890128     | 50.3490638     | 1.631E-52 | -2.214083 | down      | PREDICTED: E3 ubiquitin-protein ligase RNF5-like [Sesamum indicum]                    |
| c42239.graph_c0 | 0             | 0             | 0             | 15.5301222     | 22.4670939     | 14.4129582     | 1.59E-18  | Inf       | up        | --                                                                                    |
| c42243.graph_c0 | 87.3297975    | 79.3778156    | 83.5142306    | 488.931822     | 521.748026     | 523.738272     | 3.466E-30 | 1.597853  | up        | unnamed protein product [Coffea canephora]                                            |
| c42246.graph_c0 | 1.17864354    | 1.02758845    | 1.12373817    | 0.63048966     | 0.37107075     | 0.40517094     | 5.819E-06 | -2.250429 | down      | hypothetical protein VITISV_034155 [Vitis vinifera]                                   |
| c42248.graph_c0 | 1.76387973    | 1.40531007    | 1.54965209    | 1.27678655     | 1.2120706      | 1.44591617     | 0.0002109 | -1.279388 | down      | PREDICTED: 65-kDa microtubule-associated protein 3 [Sesamum indicum]                  |
| c42253.graph_c0 | 14.2631371    | 14.9428925    | 12.8533863    | 4.00885391     | 3.33263258     | 3.24502838     | 9.793E-58 | -3.002421 | down      | PREDICTED: lysM domain receptor-like kinase 3 [Sesamum indicum]                       |
| c42256.graph_c0 | 77.1738581    | 79.1782509    | 78.9217926    | 103.000638     | 71.0743043     | 56.0923626     | 1.474E-06 | -1.039658 | down      | PREDICTED: mpv17-like protein isoform X2 [Sesamum indicum]                            |
| c42268.graph_c0 | 64.7965441    | 62.6401462    | 56.4612762    | 24.2867896     | 29.6272282     | 34.5618306     | 1.692E-38 | -2.076433 | down      | -                                                                                     |
| c42274.graph_c0 | 16.6476766    | 18.6051743    | 18.0708632    | 7.51447758     | 9.48321183     | 8.98819068     | 1.274E-39 | -2.058883 | down      | PREDICTED: lysine-specific histone demethylase 1 homolog 1 [Sesamum indicum]          |
| c42284.graph_c0 | 26.2859333    | 27.5477867    | 23.6155529    | 3.45345728     | 3.48005488     | 3.18528743     | 9.956E-97 | -3.951781 | down      | PREDICTED: DNA repair protein RAD51 homolog [Sesamum indicum]                         |
| c42286.graph_c0 | 123.154121    | 105.34313     | 125.982343    | 514.839934     | 589.125031     | 586.301262     | 1.146E-18 | 1.232694  | up        | PREDICTED: 60S ribosomal protein L24-like [Sesamum indicum]                           |

| #ID             | 0 h-1<br>FPKM | 0 h-2<br>FPKM | 0 h-3<br>FPKM | 48 h-1<br>FPKM | 48 h-2<br>FPKM | 48 h-3<br>FPKM | FDR       | log2FC    | regulated | nr_annotation                                                                       |
|-----------------|---------------|---------------|---------------|----------------|----------------|----------------|-----------|-----------|-----------|-------------------------------------------------------------------------------------|
| c42290.graph_c1 | 2.90700641    | 2.50854942    | 2.5762885     | 0.1846982      | 0.19566535     | 0.16434335     | 7.231E-15 | -4.891447 | down      | -                                                                                   |
| c42293.graph_c1 | 10.0265538    | 7.91119751    | 11.2171103    | 1.73875112     | 2.07224547     | 1.83721722     | 6.511E-16 | -3.389937 | down      | hypothetical protein CISIN_1g015935mg [Citrus sinensis]                             |
| c42295.graph_c0 | 79.9278393    | 68.8629501    | 77.469028     | 300.126189     | 323.689616     | 358.911688     | 1.704E-15 | 1.098952  | up        | PREDICTED: 40S ribosomal protein S25-2 [Solanum lycopersicum]                       |
| c42299.graph_c0 | 6.71034372    | 7.32770522    | 5.48740013    | 4.87067165     | 3.96914308     | 2.75035602     | 6.217E-06 | -1.760484 | down      | hypothetical protein MIMGU_mgv1a012462mg [Erythranthe guttata]                      |
| c42300.graph_c0 | 0.3715127     | 0             | 0.11935213    | 4.02157538     | 4.89489489     | 4.03518724     | 2.381E-08 | 3.709927  | up        | PREDICTED: putative B3 domain-containing protein At5g66980 [Sesamum indicum]        |
| c42303.graph_c0 | 29.961936     | 31.3316359    | 29.4037539    | 10.5797819     | 7.62649359     | 7.99821337     | 5.149E-64 | -2.802065 | down      | PREDICTED: high mobility group B protein 10 [Sesamum indicum]                       |
| c42308.graph_c0 | 0.43596474    | 0.5727767     | 0.28011598    | 30.8509075     | 33.8794806     | 33.5710178     | 5.74E-115 | 5.239124  | up        | PREDICTED: zinc finger CCCH domain-containing protein 53 [Sesamum indicum]          |
| c42309.graph_c1 | 1.84959068    | 1.51757603    | 1.0909889     | 8.21254573     | 13.9972547     | 17.4733132     | 7.209E-05 | 2.13075   | up        | PREDICTED: serine/threonine-protein kinase-like protein At3g51990 [Sesamum indicum] |
| c42316.graph_c0 | 0             | 0.12859377    | 0             | 7.21937815     | 7.52267779     | 7.37152703     | 9.229E-13 | 6.419609  | up        | -                                                                                   |
| c42318.graph_c0 | 4.9334718     | 4.74474872    | 4.47508701    | 18.2247032     | 20.3453742     | 23.9476864     | 6.355E-07 | 1.1233    | up        | PREDICTED: triphosphate tunnel metalloenzyme 3 [Sesamum indicum]                    |
| c42329.graph_c0 | 8.13081282    | 9.18914229    | 10.6506438    | 6.23414147     | 5.17082181     | 4.81608821     | 9.323E-12 | -1.801651 | down      | PREDICTED: AP2-like ethylene-responsive transcription factor BBM2 [Sesamum indicum] |
| c42333.graph_c0 | 2.00739047    | 1.50705043    | 2.07799197    | 0.05137053     | 0.16326254     | 0.13712756     | 4.798E-16 | -5.026564 | down      | PREDICTED: uncharacterized protein LOC105169088 [Sesamum indicum]                   |
| c42334.graph_c1 | 689.972084    | 727.482483    | 684.610474    | 265.533856     | 387.272079     | 352.007466     | 1.06E-31  | -2.088251 | down      | PREDICTED: protein EAUARDIUM-like 2 [Sesamum indicum]                               |
| c42335.graph_c0 | 9.47713519    | 10.7191394    | 13.2333241    | 0.96246749     | 1.45659657     | 1.19283977     | 6.928E-28 | -4.237234 | down      | PREDICTED: veuspiradiene synthase 5-like [Sesamum indicum]                          |
| c42337.graph_c0 | 50.0922986    | 47.3485971    | 48.2307477    | 15.0218783     | 14.9819659     | 15.7747332     | 8.104E-58 | -2.687542 | down      | unnamed protein product [Coffea canephora]                                          |
| c42338.graph_c0 | 6.79704067    | 7.46103663    | 6.99749862    | 34.120115      | 43.0813559     | 45.8722171     | 7.86E-19  | 1.511476  | up        | PREDICTED: kinetochore protein NDC80 homolog [Sesamum indicum]                      |
| c42339.graph_c0 | 40.4468872    | 38.1878028    | 40.6385207    | 15.3101941     | 14.8597357     | 15.0653453     | 7.939E-62 | -2.415963 | down      | PREDICTED: uncharacterized protein LOC105156535 [Sesamum indicum]                   |
| c42340.graph_c0 | 189.989555    | 195.368149    | 196.193148    | 127.572861     | 145.691574     | 153.250638     | 1.464E-20 | -1.467853 | down      | phosphoglycerate kinase [Gossypium hirsutum]                                        |
| c42341.graph_c0 | 0             | 0             | 0             | 2.95964576     | 6.82817353     | 2.16530166     | 5.63E-05  | Inf       | up        | --                                                                                  |
| c42352.graph_c0 | 2.5301706     | 2.58386992    | 2.52884286    | 11.1132552     | 16.3127917     | 18.0381463     | 2.01E-07  | 1.547655  | up        | PREDICTED: putative ABC transporter C family member 15 [Sesamum indicum]            |
| c42353.graph_c0 | 2.75948121    | 1.18381903    | 1.74999505    | 0              | 0              | 0              | 6.434E-13 | -Inf      | down      | predicted protein [Physcomitrella patens]                                           |
| c42358.graph_c0 | 248.889005    | 279.994799    | 241.911836    | 62.1731711     | 53.8557277     | 63.7442958     | 2.43E-99  | -3.115405 | down      | hypothetical protein MIMGU_mgv1a016283mg [Erythranthe guttata]                      |

| #ID             | 0 h-1<br>FPKM | 0 h-2<br>FPKM | 0 h-3<br>FPKM | 48 h-1<br>FPKM | 48 h-2<br>FPKM | 48 h-3<br>FPKM | FDR       | log2FC    | regulated | nr_annotation                                                                                          |
|-----------------|---------------|---------------|---------------|----------------|----------------|----------------|-----------|-----------|-----------|--------------------------------------------------------------------------------------------------------|
| c42358.graph_c1 | 21.538499     | 22.9809305    | 22.1263979    | 19.2741122     | 20.2378893     | 23.6760912     | 1.139E-09 | -1.096469 | down      | PREDICTED: GATA transcription factor 12-like [Sesamum indicum]                                         |
| c42361.graph_c1 | 2.58740504    | 2.73388459    | 2.77076493    | 1.7215512      | 1.96406512     | 2.00315696     | 0.0026216 | -1.528978 | down      | copalyl diphosphate synthase [Isodon eriocalyx]                                                        |
| c42363.graph_c0 | 4.31296147    | 3.2294616     | 2.9239044     | 1.62689633     | 1.52463408     | 1.97653428     | 1.745E-09 | -2.044423 | down      | PREDICTED: uncharacterized protein LOC105168320 [Sesamum indicum]                                      |
| c42368.graph_c0 | 13.5472044    | 15.0006903    | 12.7757351    | 11.8766698     | 12.6352047     | 13.687377      | 3.864E-14 | -1.131612 | down      | PREDICTED: pentatricopeptide repeat-containing protein At4g19191, mitochondrial-like [Sesamum indicum] |
| c42372.graph_c1 | 0.50863441    | 0.71280122    | 1.04578456    | 11.0586577     | 15.9844442     | 15.3436152     | 5.38E-12  | 3.194069  | up        | -                                                                                                      |
| c42379.graph_c0 | 2.1364789     | 2.24045723    | 2.18983117    | 0.51549764     | 0.74469169     | 0.43783731     | 5.042E-14 | -2.972474 | down      | -                                                                                                      |
| c42385.graph_c0 | 69.4182426    | 60.1528676    | 70.25138      | 25.4670789     | 30.4619776     | 33.5031492     | 1.003E-45 | -2.181992 | down      | PREDICTED: uncharacterized protein LOC105170258 [Sesamum indicum]                                      |
| c42387.graph_c0 | 88.5108245    | 85.3409809    | 88.8007943    | 57.1793251     | 40.725954      | 33.5966421     | 2.694E-45 | -2.007142 | down      | PREDICTED: homogentisate 1,2-dioxygenase isoform X1 [Sesamum indicum]                                  |
| c42388.graph_c0 | 0             | 0             | 0             | 2.80813456     | 4.33482232     | 5.14010313     | 1.594E-16 | Inf       | up        | PREDICTED: ATP-citrate synthase beta chain protein 2-like [Citrus sinensis]                            |
| c42390.graph_c0 | 0.95799343    | 1.66774386    | 1.76630275    | 14.9268777     | 15.6912642     | 13.7257124     | 2.291E-16 | 2.314238  | up        | hypothetical protein JCGZ_15647 [Jatropha curcas]                                                      |
| c42391.graph_c0 | 14.5398584    | 12.8320016    | 12.3824905    | 1.26817192     | 3.52662025     | 3.24418379     | 1.117E-25 | -3.337783 | down      | -                                                                                                      |
| c42395.graph_c0 | 0             | 0.18019828    | 0.28916286    | 26.8253227     | 25.5631821     | 32.7968325     | 4.327E-70 | 6.469585  | up        | PREDICTED: tetraketide alpha-pyrone reductase 1-like [Sesamum indicum]                                 |
| c42396.graph_c0 | 19.2956679    | 21.0623114    | 19.8244327    | 10.1703768     | 12.7081263     | 14.7345076     | 1.499E-21 | -1.700661 | down      | BnaA08g23740D [Brassica napus]                                                                         |
| c42397.graph_c0 | 1.3424782     | 1.91974641    | 2.30018352    | 10.0709105     | 9.17151785     | 7.65094268     | 0.0008127 | 1.254883  | up        | hypothetical protein MIMGU_mgv1a015275mg [Erythranthe guttata]                                         |
| c42401.graph_c0 | 2.28542801    | 2.94688908    | 3.03642024    | 1.74862343     | 1.43659736     | 1.49240789     | 2.883E-06 | -1.837748 | down      | PREDICTED: serine/threonine-protein kinase BLUS1-like isoform X2 [Sesamum indicum]                     |
| c42402.graph_c0 | 0.28747763    | 0.95921833    | 0.61570023    | 15.3609025     | 19.3125132     | 21.4054054     | 4.376E-33 | 3.888253  | up        | PREDICTED: transcription factor bHLH71-like [Nicotiana sylvestris]                                     |
| c42403.graph_c0 | 0.90646604    | 0.63516161    | 1.04836027    | 21.5872223     | 29.3272272     | 33.7350637     | 1.969E-25 | 4.003507  | up        | PREDICTED: LOW QUALITY PROTEIN: protein YIF1B-like [Sesamum indicum]                                   |
| c42407.graph_c0 | 10.3476127    | 11.0485059    | 11.0316615    | 7.20263235     | 8.45319279     | 9.42479258     | 7.686E-07 | -1.392321 | down      | PREDICTED: myb family transcription factor APL-like [Sesamum indicum]                                  |
| c42409.graph_c0 | 51.6321754    | 46.8900103    | 54.6180482    | 301.21125      | 318.463861     | 333.077508     | 5.294E-31 | 1.617423  | up        | PREDICTED: 60S ribosomal protein L5-like [Sesamum indicum]                                             |
| c42413.graph_c0 | 560.082674    | 502.626025    | 566.234461    | 106.85838      | 100.203715     | 84.0451197     | 2.34E-109 | -3.499641 | down      | PREDICTED: extra-large guanine nucleotide-binding protein 3-like [Sesamum indicum]                     |
| c42425.graph_c0 | 1.02563823    | 1.13142701    | 0.96831605    | 3.95308961     | 5.51566418     | 5.52494725     | 4.884E-05 | 1.239741  | up        | PREDICTED: anaphase-promoting complex subunit 4 [Sesamum indicum]                                      |
| c42426.graph_c0 | 14.681265     | 14.9537901    | 14.6873518    | 10.0253609     | 12.254601      | 8.78854568     | 2.474E-19 | -1.53151  | down      | PREDICTED: uncharacterized membrane protein At3g27390 [Sesamum indicum]                                |

| #ID             | 0 h-1<br>FPKM | 0 h-2<br>FPKM | 0 h-3<br>FPKM | 48 h-1<br>FPKM | 48 h-2<br>FPKM | 48 h-3<br>FPKM | FDR       | log2FC    | regulated | nr_annotation                                                                             |
|-----------------|---------------|---------------|---------------|----------------|----------------|----------------|-----------|-----------|-----------|-------------------------------------------------------------------------------------------|
| c42427.graph_c0 | 6.4723034     | 3.23939222    | 3.366472      | 0              | 0              | 0              | 2.037E-13 | -Inf      | down      | PREDICTED: serpin-ZX-like [Malus domestica]                                               |
| c42430.graph_c0 | 36.654546     | 32.323244     | 31.650915     | 31.8925275     | 30.6631655     | 24.085342      | 8.084E-12 | -1.229612 | down      | PREDICTED: bet1-like SNARE 1-1 [Sesamum indicum]                                          |
| c42432.graph_c0 | 0.06562578    | 0.11496011    | 0.08433172    | 1.01268398     | 0.76858451     | 0.95487594     | 1.849E-05 | 2.354572  | up        | PREDICTED: uncharacterized protein LOC103330039 [Prunus mume]                             |
| c42434.graph_c1 | 1.21003851    | 1.58394254    | 1.07650204    | 10.4616539     | 11.446226      | 15.3364923     | 2.054E-07 | 2.247305  | up        | PREDICTED: uncharacterized protein LOC105170092 [Sesamum indicum]                         |
| c42437.graph_c0 | 2.68665745    | 3.41619847    | 3.07922215    | 1.03687631     | 1.70081763     | 1.27974422     | 4.061E-09 | -2.217633 | down      | PREDICTED: post-GPI attachment to proteins factor 3 [Sesamum indicum]                     |
| c42438.graph_c0 | 0.7181038     | 0.31947683    | 0.4101297     | 5.95407656     | 9.22781758     | 8.82983586     | 6.087E-14 | 3.030685  | up        | PREDICTED: uncharacterized protein LOC105168396 [Sesamum indicum]                         |
| c42439.graph_c0 | 4.87239703    | 5.51279984    | 4.45874978    | 117.292919     | 83.7654616     | 68.5287389     | 1.148E-08 | 3.175338  | up        | PREDICTED: probable serine/threonine-protein kinase At1g54610 [Nicotiana tomentosiformis] |
| c42441.graph_c0 | 26.6614838    | 29.1544158    | 22.6522535    | 19.7930508     | 20.3099458     | 18.4292108     | 3.783E-21 | -1.438009 | down      | PREDICTED: uncharacterized protein LOC105162071 [Sesamum indicum]                         |
| c42442.graph_c0 | 1.80249619    | 2.49418096    | 1.97564971    | 47.3264462     | 32.2861278     | 18.1654376     | 0.0005376 | 2.957667  | up        | PREDICTED: uncharacterized protein LOC101292603 isoform 2 [Fragaria vesca subsp. vesca]   |
| c42445.graph_c0 | 2.81482136    | 2.96593682    | 2.63065956    | 37.2229239     | 49.3309012     | 56.1838049     | 8.792E-24 | 3.062318  | up        | PREDICTED: ABC transporter B family member 1-like [Sesamum indicum]                       |
| c42449.graph_c0 | 2.75377124    | 2.65808127    | 3.12796251    | 26.0037752     | 32.1071593     | 39.2418915     | 3.779E-17 | 2.4866    | up        | PREDICTED: nemato-binding protein 2-like [Sesamum indicum]                                |
| c42450.graph_c0 | 2.47121235    | 3.21579296    | 2.06414371    | 12.0662026     | 10.4914437     | 14.585345      | 0.0045132 | 1.24594   | up        | PREDICTED: protein PLANT CADMIUM RESISTANCE 2-like [Nicotiana tomentosiformis]            |
| c42453.graph_c0 | 0.0700688     | 0.03506948    | 0             | 4.71229248     | 4.23986787     | 5.82995076     | 1.336E-20 | 6.135456  | up        | hypothetical protein MIMGU_mgv1a006178mg [Erythranthe guttata]                            |
| c42460.graph_c0 | 3.42680096    | 2.52017073    | 3.14541065    | 0              | 0              | 0              | 2.348E-25 | -Inf      | down      | hypothetical protein [Dendrobium catenatum]                                               |
| c42462.graph_c0 | 0             | 0             | 0             | 1.30477099     | 1.62413982     | 1.42219729     | 2.937E-12 | Inf       | up        | PREDICTED: 65-kDa microtubule-associated protein 8 isoform X1 [Sesamum indicum]           |
| c42463.graph_c0 | 19.3639746    | 20.1828797    | 19.4261326    | 21.2851878     | 18.6514697     | 16.7037488     | 8.675E-14 | -1.072006 | down      | PREDICTED: TBC1 domain family member 5 homolog A-like [Sesamum indicum]                   |
| c42465.graph_c0 | 12.1460642    | 14.2561167    | 11.1705554    | 3.44468668     | 5.13681118     | 5.09542071     | 3.763E-37 | -2.481    | down      | PREDICTED: uncharacterized protein LOC105168867 isoform X1 [Sesamum indicum]              |
| c42465.graph_c1 | 1.43261352    | 2.02070409    | 2.00832555    | 24.2966314     | 23.0065166     | 21.4588558     | 2.186E-35 | 2.636205  | up        | PREDICTED: transcription factor bHLH93-like [Nicotiana glauca]                            |
| c42470.graph_c0 | 0             | 0             | 0             | 1.68351501     | 1.41867729     | 1.12348615     | 1.341E-11 | Inf       | up        | DEAD-domain-containing protein [Punctularia strigosozonata HHB-11173 SS5]                 |
| c42472.graph_c0 | 48.0496938    | 44.8838994    | 40.2627875    | 4.58984571     | 4.86238498     | 5.17308834     | 9.551E-83 | -4.204367 | down      | -                                                                                         |
| c42474.graph_c0 | 192.617103    | 181.893038    | 175.72238     | 1284.66804     | 834.48457      | 680.063528     | 0.0095642 | 1.340883  | up        | PREDICTED: protein EARLY RESPONSIVE TO DEHYDRATION 15 [Sesamum indicum]                   |

| #ID             | 0 h-1<br>FPKM | 0 h-2<br>FPKM | 0 h-3<br>FPKM | 48 h-1<br>FPKM | 48 h-2<br>FPKM | 48 h-3<br>FPKM | FDR       | log2FC    | regulated | nr_annotation                                                                                                                 |
|-----------------|---------------|---------------|---------------|----------------|----------------|----------------|-----------|-----------|-----------|-------------------------------------------------------------------------------------------------------------------------------|
| c42475.graph_c0 | 0             | 0             | 0             | 3.79330322     | 5.06686084     | 3.3752584      | 1.093E-12 | Inf       | up        | --                                                                                                                            |
| c42478.graph_c0 | 0.35313514    | 0.45448553    | 0.25931008    | 2.13789023     | 5.6128531      | 5.83090746     | 0.0008403 | 2.641354  | up        | PREDICTED: pentatricopeptide repeat-containing protein At4g21170 [Sesamum indicum]                                            |
| c42478.graph_c1 | 0.65361224    | 0.55612672    | 0.79792172    | 3.13118117     | 2.90246843     | 3.18794841     | 0.005671  | 1.17989   | up        | PREDICTED: pentatricopeptide repeat-containing protein At3g16610 [Sesamum indicum]                                            |
| c42479.graph_c0 | 0.70890333    | 0.90066289    | 1.0511179     | 2.96401471     | 4.94951387     | 4.60420904     | 0.0008271 | 1.204699  | up        | PREDICTED: uncharacterized protein LOC105164847 [Sesamum indicum]                                                             |
| c42481.graph_c0 | 0.14125679    | 0.25451683    | 0.2541288     | 1.66572763     | 1.76463645     | 1.22740914     | 0.0004764 | 1.821718  | up        | hypothetical protein PGTG_21261 [Puccinia graminis f. sp. tritici CRL 75-36-700-3]                                            |
| c42486.graph_c0 | 0             | 0.03743855    | 0             | 5.16844933     | 9.74611474     | 9.25902834     | 8.598E-19 | 8.318379  | up        | hypothetical protein MIMGU_mgv1a023633mg [Erythranthe guttata]                                                                |
| c42487.graph_c1 | 0.18445075    | 0.2051505     | 0.1316814     | 3.00206238     | 2.78028069     | 3.2256206      | 1.377E-11 | 3.097719  | up        | PREDICTED: bifunctional dethiobiotin synthetase/7,8-diamino-pelargonic acid aminotransferase, mitochondrial [Sesamum indicum] |
| c42492.graph_c0 | 13.8314218    | 14.6004686    | 11.5415095    | 5.95748943     | 7.53842277     | 8.48150124     | 5.217E-24 | -1.883524 | down      | PREDICTED: uncharacterized protein At5g01610 [Sesamum indicum]                                                                |
| c42493.graph_c0 | 0.25370258    | 0.15872289    | 0.2445134     | 3.24296723     | 6.12824368     | 10.346468      | 0.0002078 | 3.875386  | up        | PREDICTED: MATE efflux family protein 1 [Sesamum indicum]                                                                     |
| c42496.graph_c0 | 31.472329     | 30.1165185    | 30.3509435    | 18.088226      | 20.7403524     | 17.1362226     | 2.02E-25  | -1.734615 | down      | hypothetical protein MIMGU_mgv1a013377mg [Erythranthe guttata]                                                                |
| c42498.graph_c0 | 15.6880956    | 12.6855248    | 13.9827192    | 55.1142505     | 58.6427612     | 63.7989959     | 6.967E-12 | 1.048871  | up        | hypothetical protein L484_022782 [Morus notabilis]                                                                            |
| c42499.graph_c0 | 0.07723091    | 0.27057886    | 0             | 1.9566292      | 2.07281139     | 2.08919628     | 4.294E-07 | 3.132081  | up        | PREDICTED: protein PHR1-LIKE 1-like isoform X1 [Sesamum indicum]                                                              |
| c42500.graph_c0 | 0             | 0             | 0             | 2.70383863     | 3.81918556     | 4.12433032     | 1.291E-28 | Inf       | up        | PREDICTED: LOW QUALITY PROTEIN: intracellular protein transport protein USO1-like [Sesamum indicum]                           |
| c42500.graph_c1 | 0             | 0             | 0             | 2.88054688     | 4.53379105     | 5.78526771     | 7.355E-11 | Inf       | up        | PREDICTED: paramyosin-like [Sesamum indicum]                                                                                  |
| c42503.graph_c0 | 14.305093     | 13.9216558    | 13.0720789    | 10.5430278     | 14.8145165     | 12.3127236     | 2.68E-06  | -1.15428  | down      | -                                                                                                                             |
| c42504.graph_c0 | 2.0602098     | 2.64228701    | 2.19242049    | 1.00831231     | 0.78542987     | 1.3193974      | 6.025E-08 | -2.164048 | down      | PREDICTED: crossover junction endonuclease EME1B-like isoform X1 [Sesamum indicum]                                            |
| c42506.graph_c0 | 92.2368761    | 103.075513    | 94.2908575    | 4.53681935     | 2.83566389     | 2.26062736     | 9.2E-258  | -5.91552  | down      | PREDICTED: mitogen-activated protein kinase kinase 2-like [Sesamum indicum]                                                   |
| c42517.graph_c1 | 6.91811984    | 5.26037246    | 4.9579169     | 29.9673458     | 30.1237237     | 28.3006392     | 5.812E-09 | 1.352437  | up        | hypothetical protein MIMGU_mgv1a017465mg [Erythranthe guttata]                                                                |
| c42520.graph_c1 | 37.4656734    | 39.2756967    | 33.5426202    | 24.7161922     | 22.0933656     | 20.551227      | 1.558E-34 | -1.724501 | down      | PREDICTED: uncharacterized protein LOC105178356 [Sesamum indicum]                                                             |
| c42522.graph_c0 | 0.11349594    | 0.03786986    | 0.04861559    | 2.14347709     | 2.08613992     | 2.4499673      | 1.531E-13 | 4.049888  | up        | hypothetical protein MIMGU_mgv1a005054mg [Erythranthe guttata]                                                                |
| c42524.graph_c0 | 8.12616914    | 8.90322079    | 7.58506251    | 64.7700244     | 96.393822      | 107.04502      | 8.295E-12 | 2.421645  | up        | T1N15.23 [Arabidopsis thaliana]                                                                                               |



| #ID             | 0 h-1<br>FPKM | 0 h-2<br>FPKM | 0 h-3<br>FPKM | 48 h-1<br>FPKM | 48 h-2<br>FPKM | 48 h-3<br>FPKM | FDR       | log2FC    | regulated | nr_annotation                                                                                               |
|-----------------|---------------|---------------|---------------|----------------|----------------|----------------|-----------|-----------|-----------|-------------------------------------------------------------------------------------------------------------|
| c42526.graph_c0 | 32.915255     | 30.4137366    | 34.3666422    | 19.4382563     | 21.0558062     | 25.2089835     | 8.92E-23  | -1.593441 | down      | PREDICTED: BI1-like protein [Sesamum indicum]                                                               |
| c42531.graph_c0 | 0.02069566    | 0.04143276    | 0.07978421    | 2.49767058     | 3.73668808     | 4.12248993     | 1.939E-20 | 5.152267  | up        | PREDICTED: probable LRR receptor-like serine/threonine-protein kinase MRH1 isoform X1 [Sesamum indicum]     |
| c42532.graph_c0 | 12.3444632    | 12.5976981    | 13.1728865    | 11.516621      | 11.7542482     | 9.83318366     | 3.866E-17 | -1.220469 | down      | PREDICTED: histidine kinase 2 isoform A2 [Sesamum indicum]                                                  |
| c42536.graph_c0 | 10.8401826    | 12.1836209    | 12.3008165    | 45.6116935     | 62.2406901     | 71.7123107     | 4.966E-07 | 1.320797  | up        | PREDICTED: signal peptidase complex subunit 3B-like [Sesamum indicum]                                       |
| c42537.graph_c0 | 18.8283772    | 17.2151643    | 16.7613779    | 18.5591332     | 14.764989      | 13.9821167     | 1.579E-16 | -1.170082 | down      | PREDICTED: uncharacterized protein LOC105173836 [Sesamum indicum]                                           |
| c42538.graph_c0 | 8.43460466    | 7.9057656     | 8.57250619    | 53.7931074     | 55.1538035     | 57.8274469     | 4.243E-28 | 1.724243  | up        | PREDICTED: triose phosphate/phosphate translocator, non-green plastid, chloroplastic-like [Sesamum indicum] |
| c42540.graph_c0 | 89.8721145    | 87.2081657    | 91.3307649    | 361.387878     | 372.553857     | 375.404804     | 1.231E-13 | 1.028841  | up        | PREDICTED: 60S ribosomal protein L36-2-like [Sesamum indicum]                                               |
| c42542.graph_c0 | 18.1468028    | 17.8972797    | 17.6981669    | 7.90146342     | 9.54514232     | 7.23423537     | 2.319E-45 | -2.141557 | down      | PREDICTED: mitogen-activated protein kinase kinase kinase 2-like [Sesamum indicum]                          |
| c42544.graph_c0 | 1.22657794    | 1.07746256    | 0.93285378    | 10.1930937     | 13.705594      | 14.363863      | 2.122E-23 | 2.542523  | up        | PREDICTED: non-lysosomal glucosylceramidase isoform X3 [Sesamum indicum]                                    |
| c42546.graph_c0 | 89.9819463    | 86.4951812    | 91.7320303    | 355.156308     | 376.482822     | 382.521093     | 7.172E-14 | 1.035506  | up        | PREDICTED: 40S ribosomal protein S9-2-like [Sesamum indicum]                                                |
| c42549.graph_c0 | 21.9241144    | 23.6924395    | 20.9245077    | 205.622369     | 211.077927     | 213.328016     | 4.01E-54  | 2.225901  | up        | hypothetical protein M569_16894, partial [Genlisea aurea]                                                   |
| c42549.graph_c1 | 21.9392806    | 21.7048925    | 23.3660538    | 204.321037     | 218.036356     | 223.650656     | 1.959E-52 | 2.249507  | up        | hypothetical protein M569_06257, partial [Genlisea aurea]                                                   |
| c42552.graph_c0 | 1.78712238    | 1.78891191    | 1.86592495    | 1.92081599     | 1.0901098      | 1.2513277      | 0.0013493 | -1.359968 | down      | PREDICTED: 3-ketoacyl-CoA synthase 11-like [Sesamum indicum]                                                |
| c42554.graph_c0 | 26.900506     | 26.2749199    | 28.9836893    | 16.8553034     | 15.7778809     | 15.0689958     | 9.405E-29 | -1.801039 | down      | PREDICTED: protein REVEILLE 6 isoform X2 [Sesamum indicum]                                                  |
| c42556.graph_c0 | 1263.48934    | 1254.2425     | 1261.84737    | 140.449692     | 133.733767     | 122.794436     | 6.441E-93 | -4.266898 | down      | PREDICTED: LOW QUALITY PROTEIN: low-temperature-induced 65 kDa protein [Sesamum indicum]                    |
| c42557.graph_c0 | 0             | 0             | 0             | 0.95759049     | 1.76194123     | 2.01803273     | 2.074E-08 | Inf       | up        | PREDICTED: MLO-like protein 11 [Sesamum indicum]                                                            |
| c42557.graph_c1 | 0.03129634    | 0.09398302    | 0             | 2.04708801     | 2.01592029     | 2.20630771     | 2.831E-11 | 4.641346  | up        | PREDICTED: MLO-like protein 11 [Sesamum indicum]                                                            |
| c42559.graph_c0 | 0.25652133    | 0.19971637    | 0.36626673    | 2.38950001     | 4.97931876     | 6.37848821     | 7.374E-05 | 3.026999  | up        | PREDICTED: carnitoyltransferase [Sesamum indicum]                                                           |
| c42560.graph_c0 | 7.36087219    | 7.70535215    | 7.32609768    | 4.83113332     | 4.85975224     | 4.45646432     | 1.983E-17 | -1.67911  | down      | hypothetical protein PRUPE_ppa004658mg [Prunus persica]                                                     |
| c42560.graph_c1 | 3.32325057    | 3.85883083    | 3.75804753    | 2.32681234     | 2.07576887     | 3.81386458     | 0.0038683 | -1.43434  | down      | PREDICTED: probable folate-biopterin transporter 2 [Sesamum indicum]                                        |
| c42561.graph_c0 | 19.6541767    | 20.2197469    | 20.9956049    | 182.936045     | 147.962208     | 124.50896      | 2.162E-08 | 1.890995  | up        | PREDICTED: probable WRKY transcription factor 4 [Sesamum indicum]                                           |
| c42562.graph_c0 | 9.62075456    | 9.87668979    | 8.82171635    | 5.25902265     | 5.28312628     | 6.57542946     | 1.948E-21 | -1.744523 | down      | PREDICTED: NADPH-dependent diflavin oxidoreductase 1 isoform X1 [Sesamum indicum]                           |

| #ID             | 0 h-1<br>FPKM | 0 h-2<br>FPKM | 0 h-3<br>FPKM | 48 h-1<br>FPKM | 48 h-2<br>FPKM | 48 h-3<br>FPKM | FDR       | log2FC    | regulated | nr_annotation                                                                                    |
|-----------------|---------------|---------------|---------------|----------------|----------------|----------------|-----------|-----------|-----------|--------------------------------------------------------------------------------------------------|
| c42564.graph_c0 | 16.0732871    | 16.3873335    | 16.9573442    | 3.38201936     | 1.83983646     | 1.21998668     | 1.77E-34  | -3.941331 | down      | PREDICTED: uncharacterized protein LOC103940260 [Pyrus x bretschneideri]                         |
| c42566.graph_c0 | 9.43290269    | 9.38854576    | 8.61638897    | 5.84298699     | 7.40956348     | 7.63335783     | 7.006E-20 | -1.414716 | down      | PREDICTED: protein CHROMATIN REMODELING 8 [Sesamum indicum]                                      |
| c42567.graph_c0 | 20.6577659    | 22.2729048    | 20.5957974    | 20.2825909     | 21.968986      | 22.0657172     | 9.815E-13 | -1.000799 | down      | PREDICTED: RNA-binding protein pno1 [Sesamum indicum]                                            |
| c42569.graph_c0 | 4.37158891    | 4.37596639    | 3.32174964    | 29.3474365     | 37.2858003     | 39.699501      | 1.38E-25  | 2.119735  | up        | PREDICTED: probable leucine-rich repeat receptor-like protein kinase Atlg35710 [Sesamum indicum] |
| c42571.graph_c0 | 14.1956888    | 12.949547     | 13.2294317    | 70.1435388     | 72.7905973     | 70.9536402     | 9.465E-23 | 1.387823  | up        | hypothetical protein MIMGU_mgv1a020880mg [Erythranthe guttata]                                   |
| c42576.graph_c0 | 33.7830607    | 34.7894989    | 35.0085884    | 28.9197495     | 33.846555      | 31.1854838     | 3.058E-15 | -1.160853 | down      | PREDICTED: rRNA-processing protein EFG1-like isoform X2 [Sesamum indicum]                        |
| c42579.graph_c0 | 1.52251327    | 1.41708781    | 1.37297532    | 0.7628385      | 1.1991679      | 1.22616355     | 0.0004422 | -1.46057  | down      | PREDICTED: arginine decarboxylase [Sesamum indicum]                                              |
| c42588.graph_c0 | 2.71037449    | 1.92177104    | 2.08008829    | 24.5535754     | 29.8324394     | 29.4387472     | 3.42E-36  | 2.623249  | up        | PREDICTED: alpha-galactosidase-like [Sesamum indicum]                                            |
| c42589.graph_c0 | 35.5341043    | 35.5248034    | 32.0935534    | 18.9808779     | 20.326741      | 20.527848      | 7.438E-37 | -1.803414 | down      | hypothetical protein M569_03173, partial [Genlisea aurea]                                        |
| c42590.graph_c0 | 16.8800917    | 14.6160503    | 16.836986     | 13.4794107     | 13.7238253     | 13.198204      | 5.288E-15 | -1.276585 | down      | PREDICTED: LRR receptor-like serine/threonine-protein kinase GSO1 [Sesamum indicum]              |
| c42592.graph_c1 | 233.05321     | 226.491291    | 245.03122     | 97.6935156     | 78.1150554     | 66.597739      | 3.606E-67 | -2.551611 | down      | hypothetical protein MIMGU_mgv1a008823mg [Erythranthe guttata]                                   |
| c42595.graph_c0 | 1.59394858    | 1.50690331    | 1.650009      | 0.97896626     | 0.47533569     | 0.36294929     | 7.409E-07 | -2.386979 | down      | -                                                                                                |
| c42595.graph_c1 | 61.3563007    | 62.5279665    | 62.7683648    | 53.9505152     | 54.8159097     | 51.0596978     | 2.212E-18 | -1.241209 | down      | PREDICTED: ABSCISIC ACID-INSENSITIVE 5-like protein 6 isoform X2 [Sesamum indicum]               |
| c42597.graph_c0 | 5.93219562    | 5.26589403    | 6.9998334     | 141.955777     | 188.727628     | 177.447632     | 2.815E-72 | 3.778743  | up        | hypothetical protein MIMGU_mgv1a007920mg [Erythranthe guttata]                                   |
| c42598.graph_c1 | 29.7761856    | 29.6310156    | 27.2562469    | 19.7820062     | 21.9234288     | 19.7991635     | 3.706E-25 | -1.512432 | down      | PREDICTED: mechanosensitive ion channel protein 1, mitochondrial-like [Sesamum indicum]          |
| c42599.graph_c0 | 27.4138918    | 25.7845069    | 22.9092366    | 14.4226179     | 25.0050837     | 22.1329586     | 3.251E-17 | -1.330702 | down      | -                                                                                                |
| c42602.graph_c0 | 0.1963911     | 0.27522286    | 0.35331847    | 1.66454028     | 3.18174832     | 2.73681139     | 2.675E-05 | 2.167592  | up        | PREDICTED: uncharacterized protein LOC105171438 isoform X1 [Sesamum indicum]                     |
| c42604.graph_c0 | 3.37282137    | 3.14600337    | 3.4279653     | 2.25982766     | 2.27431272     | 2.38780252     | 3.531E-11 | -1.541419 | down      | PREDICTED: uncharacterized protein LOC105176546 [Sesamum indicum]                                |
| c42608.graph_c0 | 0             | 0             | 0             | 1.46470398     | 1.12849183     | 0.86885653     | 3.104E-09 | Inf       | up        | PREDICTED: uncharacterized protein LOC105177151 [Sesamum indicum]                                |
| c42613.graph_c0 | 157.675664    | 174.582388    | 159.039181    | 120.865139     | 101.1852       | 75.4374139     | 8.961E-33 | -1.735016 | down      | hypothetical protein MIMGU_mgv1a008930mg [Erythranthe guttata]                                   |
| c42619.graph_c0 | 1.46118793    | 1.15651482    | 1.00434279    | 16.6232838     | 17.444531      | 21.9501748     | 2.409E-30 | 2.934032  | up        | PREDICTED: uncharacterized protein LOC103434215 [Malus domestica]                                |

| #ID             | 0 h-1<br>FPKM | 0 h-2<br>FPKM | 0 h-3<br>FPKM | 48 h-1<br>FPKM | 48 h-2<br>FPKM | 48 h-3<br>FPKM | FDR       | log2FC    | regulated | nr_annotation                                                                                                     |
|-----------------|---------------|---------------|---------------|----------------|----------------|----------------|-----------|-----------|-----------|-------------------------------------------------------------------------------------------------------------------|
| c42622.graph_c1 | 1.23415681    | 1.33422404    | 1.17359587    | 1.00054746     | 0.86723895     | 1.09261773     | 0.0012338 | -1.353729 | down      | PREDICTED: glycosyltransferase family protein 64 protein C5-like [Sesamum indicum]                                |
| c42624.graph_c0 | 0.1111824     | 0             | 0.22859806    | 2.76556896     | 3.88467785     | 5.03094155     | 1.231E-12 | 4.063078  | up        | PREDICTED: uncharacterized protein LOC105179248 isoform X1 [Sesamum indicum]                                      |
| c42629.graph_c0 | 0.18594783    | 0.17450065    | 0.13440956    | 2.30194145     | 2.18909383     | 3.2676791      | 4.211E-13 | 2.954075  | up        | PREDICTED: DNA polymerase alpha catalytic subunit [Sesamum indicum]                                               |
| c42630.graph_c0 | 1.25021141    | 1.0092446     | 1.14014728    | 14.4157808     | 15.2717717     | 15.6701896     | 7.689E-21 | 2.719429  | up        | PREDICTED: uncharacterized protein LOC101231346, partial [Cucumis sativus]                                        |
| c42633.graph_c0 | 35.0491982    | 33.1463051    | 32.5143071    | 8.57981        | 7.19974302     | 6.51238235     | 1.279E-90 | -3.188103 | down      | PREDICTED: probable leucine-rich repeat receptor-like serine/threonine-protein kinase At5g15730 [Sesamum indicum] |
| c42636.graph_c0 | 21.2249058    | 19.1262543    | 22.9205454    | 1000.23374     | 802.137619     | 737.849054     | 5.64E-30  | 4.313691  | up        | hypothetical protein MIMGU_mgv1a009141mg [Erythranthe guttata]                                                    |
| c42642.graph_c0 | 585.482624    | 572.994012    | 617.057386    | 181.307504     | 172.025619     | 175.383311     | 1.773E-60 | -2.764892 | down      | PREDICTED: leucine-rich repeat receptor-like protein kinase PXL1 [Sesamum indicum]                                |
| c42644.graph_c0 | 0.61175993    | 0.30618626    | 0.78613572    | 17.1895909     | 21.7926388     | 23.3189033     | 9.128E-11 | 4.164464  | up        | -                                                                                                                 |
| c42644.graph_c1 | 55.9377296    | 58.82255      | 50.1199421    | 14.2042518     | 18.3938652     | 17.4934057     | 3.808E-80 | -2.739289 | down      | PREDICTED: scarecrow-like protein 14 [Sesamum indicum]                                                            |
| c42653.graph_c0 | 0.13414578    | 0.1342801     | 0             | 2.52111029     | 3.06357693     | 4.04668093     | 1.017E-13 | 4.158555  | up        | PREDICTED: protein trichome birefringence-like 14 [Sesamum indicum]                                               |
| c42659.graph_c0 | 0.27310139    | 0.18224991    | 0.29245509    | 5.49324084     | 4.35346117     | 5.22365934     | 7.722E-11 | 3.316285  | up        | hypothetical protein MIMGU_mgv1a021608mg, partial [Erythranthe guttata]                                           |
| c42665.graph_c0 | 2.34147002    | 2.27487892    | 2.25666125    | 17.1934746     | 16.265259      | 16.5970598     | 1.851E-15 | 1.848326  | up        | PREDICTED: uncharacterized protein LOC105168054 [Sesamum indicum]                                                 |
| c42669.graph_c0 | 19.0756285    | 15.4865284    | 16.1506647    | 188.050486     | 163.134153     | 149.911089     | 8.78E-22  | 2.291822  | up        | PREDICTED: zeaxanthin epoxidase, chloroplastic-like [Sesamum indicum]                                             |
| c42672.graph_c0 | 0.77046818    | 1.67101931    | 0.82506842    | 5.52070973     | 5.97384802     | 5.82457755     | 0.0005833 | 1.390453  | up        | PREDICTED: uncharacterized protein LOC105171447 isoform X1 [Sesamum indicum]                                      |
| c42676.graph_c0 | 18.9072705    | 21.1725374    | 17.2809236    | 8.67073452     | 11.5391955     | 9.65082333     | 2.508E-41 | -1.961961 | down      | PREDICTED: uncharacterized protein At1g04910 [Sesamum indicum]                                                    |
| c42679.graph_c0 | 1.10822638    | 0.63390634    | 1.18676231    | 0.53479403     | 0.61805392     | 0.71378477     | 0.0005111 | -1.673891 | down      | PREDICTED: probable methyltransferase PMT10 [Sesamum indicum]                                                     |
| c42680.graph_c0 | 0             | 0             | 0             | 2.95262104     | 4.69191596     | 4.45168587     | 1.019E-12 | Inf       | up        | PREDICTED: uncharacterized protein LOC104243668 [Nicotiana glauca]                                                |
| c42680.graph_c1 | 99.6258533    | 92.3567258    | 86.7151985    | 37.0744355     | 29.9358757     | 25.1437574     | 1.262E-40 | -2.607071 | down      | PREDICTED: alpha,alpha-trehalose-phosphate synthase [UDP-forming] 6 [Solanum lycopersicum]                        |
| c42680.graph_c2 | 39.1565275    | 40.7807795    | 40.8986589    | 19.0896063     | 15.593902      | 14.2958085     | 5.529E-54 | -2.315772 | down      | PREDICTED: nuclear pore complex protein GP210 [Sesamum indicum]                                                   |

| #ID             | 0 h-1<br>FPKM | 0 h-2<br>FPKM | 0 h-3<br>FPKM | 48 h-1<br>FPKM | 48 h-2<br>FPKM | 48 h-3<br>FPKM | FDR       | log2FC    | regulated | nr_annotation                                                                                     |
|-----------------|---------------|---------------|---------------|----------------|----------------|----------------|-----------|-----------|-----------|---------------------------------------------------------------------------------------------------|
| c42680.graph_c3 | 154.441695    | 154.307919    | 167.731442    | 66.946755      | 52.7555965     | 47.4755465     | 3.071E-68 | -2.523701 | down      | PREDICTED: alpha,alpha-trehalose-phosphate synthase [UDP-forming] 6 [Sesamum indicum]             |
| c42683.graph_c1 | 52.0569167    | 53.0425934    | 51.3153725    | 50.4576786     | 51.3437741     | 48.9974335     | 4.921E-14 | -1.069917 | down      | hypothetical protein PRUPE_ppa012854mg [Prunus persica]                                           |
| c42686.graph_c0 | 46.7055174    | 44.6532037    | 44.0951797    | 26.4608604     | 26.6676801     | 25.7845877     | 1.909E-30 | -1.796315 | down      | unnamed protein product [Coffea canephora]                                                        |
| c42690.graph_c0 | 30.0734074    | 28.976493     | 29.7361089    | 14.0848094     | 19.3743585     | 21.7619972     | 2.515E-30 | -1.709142 | down      | PREDICTED: probable polyamine oxidase 2 isoform X1 [Sesamum indicum]                              |
| c42691.graph_c0 | 0.69246996    | 0.83179604    | 0.62289592    | 4.92815211     | 9.27575402     | 11.3812368     | 3.217E-05 | 2.547353  | up        | PREDICTED: pentatricopeptide repeat-containing protein At5g46100 [Sesamum indicum]                |
| c42694.graph_c0 | 0.85502949    | 0.76579245    | 0.4915446     | 81.9217297     | 135.273942     | 135.789896     | 5.338E-34 | 6.363493  | up        | hypothetical protein MIMGU_mgv1a002094mg [Erythranthe guttata]                                    |
| c42697.graph_c0 | 0             | 0             | 0.06264994    | 12.5761249     | 11.4671926     | 12.389106      | 2.302E-36 | 8.135032  | up        | PREDICTED: micronuclear linker histone polyprotein-like [Sesamum indicum]                         |
| c42698.graph_c0 | 3.78177587    | 4.48087018    | 2.90922715    | 0.26070887     | 0.15064879     | 0.50613205     | 2.097E-28 | -4.622194 | down      | hypothetical protein MIMGU_mgv1a010940mg [Erythranthe guttata]                                    |
| c42706.graph_c0 | 1.52113436    | 1.38423413    | 2.19165337    | 13.4616277     | 14.4409113     | 14.6230763     | 2.043E-12 | 2.037131  | up        | PREDICTED: uncharacterized protein LOC105176645 [Sesamum indicum]                                 |
| c42707.graph_c0 | 0.03246437    | 0.06499377    | 0             | 1.97394775     | 2.56642153     | 2.44832468     | 1.531E-12 | 5.157023  | up        | PREDICTED: uncharacterized protein LOC105170754 [Sesamum indicum]                                 |
| c42707.graph_c1 | 40.6117638    | 39.1322234    | 42.732695     | 3.90786675     | 5.51988129     | 5.68800635     | 5.5E-145  | -4.042986 | down      | PREDICTED: uncharacterized protein LOC105175855 [Sesamum indicum]                                 |
| c42708.graph_c0 | 11.8608327    | 5.03462997    | 4.05157507    | 0              | 0              | 0              | 1.533E-08 | -Inf      | down      | PREDICTED: ribulose biphosphate carboxylase small chain, chloroplastic-like [Phoenix dactylifera] |
| c42710.graph_c0 | 53.80395      | 55.4573044    | 45.4090252    | 19.3782228     | 22.855313      | 19.669048      | 8.852E-61 | -2.338705 | down      | PREDICTED: cysteine-rich receptor-like protein kinase 10 [Sesamum indicum]                        |
| c42712.graph_c0 | 2.33292904    | 2.005282      | 2.11808589    | 15.2082544     | 17.4972199     | 19.144652      | 7.326E-23 | 1.985342  | up        | PREDICTED: phosphoglucomutase, chloroplastic [Sesamum indicum]                                    |
| c42713.graph_c1 | 100.954797    | 95.7371566    | 93.8120854    | 82.4576334     | 87.1347491     | 82.5109215     | 4.106E-18 | -1.222013 | down      | PREDICTED: probable CCR4-associated factor 1 homolog 7 [Sesamum indicum]                          |
| c42720.graph_c0 | 74.3202553    | 73.2753577    | 69.5371078    | 3.86308974     | 4.83301828     | 5.69618666     | 8.86E-201 | -4.937285 | down      | PREDICTED: mitochondrial carrier protein MTM1-like [Sesamum indicum]                              |
| c42722.graph_c0 | 19.5932882    | 20.6451663    | 16.6970897    | 11.4003885     | 11.9263626     | 11.8346633     | 1.089E-20 | -1.711676 | down      | PREDICTED: DNA-directed RNA polymerase II subunit 1 [Sesamum indicum]                             |
| c42722.graph_c1 | 28.2533191    | 29.3702851    | 24.8801804    | 18.706824      | 19.374369      | 19.4863694     | 4.419E-28 | -1.535839 | down      | PREDICTED: DNA-directed RNA polymerase II subunit 1 [Sesamum indicum]                             |
| c42723.graph_c0 | 19.3115776    | 17.3099559    | 16.6944954    | 88.7128186     | 90.1253044     | 81.1667798     | 4.821E-14 | 1.270143  | up        | PREDICTED: uncharacterized protein LOC105052633 [Elaeis guineensis]                               |

| #ID             | 0 h-1<br>FPKM | 0 h-2<br>FPKM | 0 h-3<br>FPKM | 48 h-1<br>FPKM | 48 h-2<br>FPKM | 48 h-3<br>FPKM | FDR       | log2FC    | regulated | nr_annotation                                                                                       |
|-----------------|---------------|---------------|---------------|----------------|----------------|----------------|-----------|-----------|-----------|-----------------------------------------------------------------------------------------------------|
| c42724.graph_c0 | 0.45369634    | 0.51470406    | 0.4664142     | 4.51412631     | 5.01832597     | 6.14893411     | 1.118E-09 | 2.429353  | up        | PREDICTED: U-box domain-containing protein 11-like [Sesamum indicum]                                |
| c42727.graph_c0 | 0.19755014    | 0.13183197    | 0.08461992    | 1.8806261      | 2.82777399     | 2.59102419     | 9.717E-07 | 3.12296   | up        | -                                                                                                   |
| c42728.graph_c0 | 9.35726117    | 8.38223989    | 7.95247666    | 3.07483491     | 3.7324544      | 3.89224249     | 3.002E-49 | -2.283763 | down      | PREDICTED: G-type lectin S-receptor-like serine/threonine-protein kinase SD2-2 [Sesamum indicum]    |
| c42730.graph_c0 | 2.06079656    | 2.29206681    | 2.64820516    | 0.31642337     | 0.39108089     | 0.18770107     | 1.036E-13 | -3.986629 | down      | PREDICTED: uncharacterized protein LOC104646173 [Solanum lycopersicum]                              |
| c42731.graph_c0 | 33.0929906    | 33.2099919    | 29.4450814    | 21.8428868     | 23.7531379     | 23.9340309     | 1.594E-22 | -1.479417 | down      | PREDICTED: lipase-like [Sesamum indicum]                                                            |
| c42733.graph_c0 | 20.9317812    | 20.3779777    | 24.0809031    | 16.9754461     | 17.168314      | 13.863758      | 1.331E-16 | -1.463547 | down      | PREDICTED: uncharacterized protein LOC105161097 [Sesamum indicum]                                   |
| c42736.graph_c0 | 0.30251359    | 0.20187767    | 0.21596774    | 10.1104442     | 9.84146066     | 10.566761      | 2.738E-56 | 4.389693  | up        | PREDICTED: probable polynucleotide nucleotidyltransferase 1, chloroplastic-like [Solanum tuberosum] |
| c42737.graph_c0 | 0             | 0             | 0             | 2.84662216     | 4.6072446      | 3.65864385     | 1.805E-12 | Inf       | up        | hypothetical protein MIMGU_mgv1a011219mg [Erythranthe guttata]                                      |
| c42739.graph_c0 | 2.71986182    | 3.27718607    | 2.86945868    | 16.9677061     | 18.5815019     | 19.1440183     | 8.057E-22 | 1.605731  | up        | PREDICTED: nardilysin isoform X1 [Sesamum indicum]                                                  |
| c42741.graph_c0 | 20.6137178    | 20.8071593    | 20.3172726    | 12.7041243     | 13.2701795     | 12.4777438     | 2.414E-33 | -1.700699 | down      | PREDICTED: zinc finger CCCH domain-containing protein 41 [Sesamum indicum]                          |
| c42742.graph_c0 | 0.19312334    | 0.2416459     | 0.06204278    | 1.17870552     | 1.5314191      | 1.32584794     | 0.0002796 | 2.010648  | up        | PREDICTED: uncharacterized protein LOC105163391 [Sesamum indicum]                                   |
| c42744.graph_c0 | 21.3280843    | 21.6784565    | 20.508644     | 11.0188173     | 14.5067238     | 14.5645138     | 5.342E-31 | -1.685891 | down      | PREDICTED: MAR-binding filament-like protein 1-1 [Sesamum indicum]                                  |
| c42747.graph_c0 | 239.098083    | 246.669119    | 227.588765    | 46.4202767     | 17.4400569     | 9.29531711     | 2.24E-165 | -4.276915 | down      | hypothetical protein MIMGU_mgv1a015419mg [Erythranthe guttata]                                      |
| c42749.graph_c0 | 0.05573454    | 0             | 0             | 0.85577161     | 0.68900555     | 0.7005436      | 4.876E-09 | 4.340297  | up        | -                                                                                                   |
| c42749.graph_c1 | 0.11477048    | 0             | 0             | 3.91216006     | 7.61684396     | 7.52652216     | 2.407E-10 | 6.367957  | up        | -                                                                                                   |
| c42754.graph_c0 | 0.20685667    | 0.37271485    | 0.0531638     | 2.17249635     | 2.22074219     | 1.66176553     | 0.0001018 | 2.253787  | up        | -                                                                                                   |
| c42755.graph_c0 | 4.00330412    | 3.96950799    | 2.81486273    | 1.80925899     | 2.65387918     | 3.00302258     | 3.301E-06 | -1.552473 | down      | PREDICTED: uncharacterized protein LOC105156766 [Sesamum indicum]                                   |
| c42757.graph_c1 | 2.69903379    | 2.66368383    | 2.00285882    | 16.5301445     | 15.6937335     | 13.7424038     | 1.127E-10 | 1.629385  | up        | hypothetical protein MIMGU_mgv1a010783mg [Erythranthe guttata]                                      |
| c42758.graph_c0 | 0.24055833    | 0.36119882    | 0.92738093    | 4.32155143     | 5.04771457     | 4.43687363     | 8.315E-05 | 2.141326  | up        | PREDICTED: uncharacterized protein LOC100262706 [Vitis vinifera]                                    |
| c42760.graph_c0 | 16.6812682    | 16.9842973    | 15.1205468    | 6.43222715     | 7.5120773      | 6.90639732     | 5.12E-53  | -2.245007 | down      | PREDICTED: protein PHOTOPERIOD-INDEPENDENT EARLY FLOWERING 1 isoform X1 [Sesamum indicum]           |
| c42764.graph_c0 | 2.26045893    | 2.0437493     | 1.40553833    | 10.8154721     | 10.6748583     | 14.6445205     | 1.58E-05  | 1.646621  | up        | PREDICTED: LOW QUALITY PROTEIN: protein IQ-DOMAIN 14 [Sesamum indicum]                              |

| #ID             | 0 h-1<br>FPKM | 0 h-2<br>FPKM | 0 h-3<br>FPKM | 48 h-1<br>FPKM | 48 h-2<br>FPKM | 48 h-3<br>FPKM | FDR       | log2FC    | regulated | nr_annotation                                                                                                         |
|-----------------|---------------|---------------|---------------|----------------|----------------|----------------|-----------|-----------|-----------|-----------------------------------------------------------------------------------------------------------------------|
| c42766.graph_c0 | 57.2857277    | 58.8910446    | 57.496092     | 36.2494148     | 46.3505413     | 46.9873579     | 2.598E-24 | -1.444453 | down      | PREDICTED: LOW QUALITY PROTEIN: neurofilament heavy polypeptide [Sesamum indicum]                                     |
| c42770.graph_c0 | 13.0491816    | 12.7005245    | 12.2282629    | 9.13653546     | 11.4816278     | 8.6562503      | 2.312E-13 | -1.394752 | down      | PREDICTED: E3 ubiquitin-protein ligase Topors [Sesamum indicum]                                                       |
| c42771.graph_c0 | 1.0375451     | 0.99863851    | 1.07688528    | 36.7636239     | 26.8342086     | 24.4686145     | 1.889E-14 | 3.81138   | up        | PREDICTED: uncharacterized protein LOC105176977 [Sesamum indicum]                                                     |
| c42773.graph_c0 | 0.08966356    | 0.26926003    | 0.23044244    | 2.18900382     | 1.92519436     | 2.7562676      | 6.769E-06 | 2.520898  | up        | PREDICTED: probable beta-1,3-galactosyltransferase 20 [Sesamum indicum]                                               |
| c42773.graph_c1 | 0             | 0             | 0             | 1.50511155     | 1.93615815     | 1.65810568     | 1.568E-12 | Inf       | up        | PREDICTED: probable beta-1,3-galactosyltransferase 20 [Sesamum indicum]                                               |
| c42774.graph_c0 | 12.4726889    | 11.6455319    | 11.5757049    | 9.9619271      | 9.61022776     | 7.84761043     | 2.287E-19 | -1.39508  | down      | PREDICTED: uncharacterized protein LOC105163756 [Sesamum indicum]                                                     |
| c42776.graph_c0 | 1.71231077    | 0.99984815    | 0.97794984    | 0              | 0              | 0              | 4.795E-15 | -Inf      | down      | unnamed protein product [Coffea canephora]                                                                            |
| c42779.graph_c0 | 27.2465449    | 29.8257653    | 27.8465081    | 15.5598667     | 21.0712624     | 24.5554174     | 1.019E-15 | -1.496746 | down      | PREDICTED: serine-threonine kinase receptor-associated protein [Solanum lycopersicum]                                 |
| c42780.graph_c0 | 24.2585071    | 26.1674334    | 29.8703839    | 17.2784072     | 18.0216843     | 19.4700583     | 4.177E-17 | -1.572778 | down      | hypothetical protein MIMGU_mgv1a013973mg [Erythranthe guttata]                                                        |
| c42782.graph_c2 | 2.56260058    | 2.63642127    | 2.65272925    | 13.9682726     | 17.7850183     | 17.2137139     | 5.304E-07 | 1.618771  | up        | hypothetical protein MIMGU_mgv1a014334mg [Erythranthe guttata]                                                        |
| c42783.graph_c0 | 7.20083563    | 4.83577782    | 5.1537695     | 0              | 0              | 0              | 5.973E-32 | -Inf      | down      | PREDICTED: glycine-rich RNA-binding protein-like isoform X1 [Eucalyptus grandis]                                      |
| c42786.graph_c0 | 6.00304211    | 4.81427073    | 4.73675679    | 29.6248003     | 32.6173114     | 33.0650705     | 1.767E-19 | 1.597722  | up        | PREDICTED: protein TIC 40, chloroplastic-like [Sesamum indicum]                                                       |
| c42789.graph_c1 | 0             | 0.02447979    | 0.09427811    | 1.28419986     | 1.33658641     | 1.00234501     | 2.622E-09 | 3.891589  | up        | PREDICTED: ABC transporter G family member 15-like isoform X1 [Sesamum indicum]                                       |
| c42792.graph_c0 | 2.89511177    | 1.97912932    | 2.26849588    | 0.52042259     | 0.41349348     | 0.4630689      | 1.342E-10 | -3.366565 | down      | PREDICTED: external alternative NAD(P)H-ubiquinone oxidoreductase B1, mitochondrial-like isoform X2 [Sesamum indicum] |
| c42794.graph_c0 | 5.53287244    | 5.83162286    | 5.31155846    | 210.666054     | 122.006221     | 114.00103      | 6.314E-07 | 3.738523  | up        | PREDICTED: LOW QUALITY PROTEIN: cytochrome P450 78A7-like [Sesamum indicum]                                           |
| c42796.graph_c0 | 57.9906899    | 56.3711733    | 58.0093436    | 53.2466573     | 53.8920181     | 52.9618276     | 2.597E-15 | -1.124167 | down      | PREDICTED: putative oxidoreductase 11A3 [Sesamum indicum]                                                             |
| c42797.graph_c0 | 68.4494852    | 70.999687     | 61.7742379    | 58.464317      | 23.8124034     | 13.6063066     | 1.418E-12 | -2.062302 | down      | PREDICTED: LOW QUALITY PROTEIN: probable WRKY transcription factor 33 [Sesamum indicum]                               |
| c42798.graph_c0 | 3.75476919    | 4.34472162    | 3.80690208    | 19.8979789     | 20.4743429     | 23.3244246     | 1.425E-12 | 1.400934  | up        | PREDICTED: uncharacterized protein LOC105176928 [Sesamum indicum]                                                     |
| c42799.graph_c0 | 38.4660335    | 44.0537368    | 36.9758597    | 17.3365413     | 13.9492988     | 13.1383343     | 3.087E-59 | -2.439145 | down      | PREDICTED: uncharacterized protein LOC105164926 [Sesamum indicum]                                                     |

| #ID             | 0 h-1<br>FPKM | 0 h-2<br>FPKM | 0 h-3<br>FPKM | 48 h-1<br>FPKM | 48 h-2<br>FPKM | 48 h-3<br>FPKM | FDR       | log2FC    | regulated | nr_annotation                                                                             |
|-----------------|---------------|---------------|---------------|----------------|----------------|----------------|-----------|-----------|-----------|-------------------------------------------------------------------------------------------|
| c42801.graph_c0 | 21.5200614    | 19.3198301    | 23.5618156    | 4.40076848     | 4.42662196     | 3.67845749     | 1.61E-56  | -3.382075 | down      | vacuolar H+-ATPase A subunit [Citrus unshiu]                                              |
| c42802.graph_c1 | 98.4030965    | 98.6034954    | 97.247202     | 79.5304612     | 89.649037      | 78.6625694     | 4.539E-19 | -1.266262 | down      | PREDICTED: cAMP-regulated phosphoprotein 21-like [Sesamum indicum]                        |
| c42803.graph_c0 | 30.9510395    | 31.7744116    | 29.6011088    | 298.438027     | 266.972334     | 256.701797     | 3.616E-34 | 2.140204  | up        | PREDICTED: 2,3-bisphosphoglycerate-independent phosphoglycerate mutase [Sesamum indicum]  |
| c42808.graph_c0 | 6.0338462     | 5.73329487    | 6.45488287    | 5.95381236     | 4.4838926      | 5.3729887      | 2.433E-07 | -1.219049 | down      | PREDICTED: receptor-like cytosolic serine/threonine-protein kinase RBK1 [Sesamum indicum] |
| c42810.graph_c0 | 0.80684377    | 0.56834749    | 0.7680194     | 18.6655185     | 20.2404931     | 20.3808905     | 1.157E-52 | 3.77015   | up        | hypothetical protein MIMGU_mgv1a004563mg [Erythranthe guttata]                            |
| c42811.graph_c1 | 2.18045566    | 1.69154526    | 2.17152818    | 45.6494794     | 32.8252743     | 25.2023197     | 1.979E-07 | 3.091139  | up        | hypothetical protein MIMGU_mgv1a016107mg [Erythranthe guttata]                            |
| c42812.graph_c0 | 0.68415176    | 0.59144999    | 0.31969531    | 3.38062073     | 3.33855383     | 3.415928       | 0.0002342 | 1.656946  | up        | PREDICTED: protein PFAZ-like isoform LZ [Sesamum indicum]                                 |
| c42815.graph_c0 | 12.4726274    | 13.7336286    | 12.6219083    | 11.7060466     | 11.9446534     | 8.94623181     | 5.379E-07 | -1.267814 | down      | hypothetical protein MIMGU_mgv1a002605mg [Erythranthe guttata]                            |
| c42816.graph_c0 | 11.8001791    | 11.7601882    | 11.0402358    | 57.8122908     | 64.5283551     | 68.6658185     | 7.152E-24 | 1.445492  | up        | hypothetical protein MIMGU_mgv1a003367mg [Erythranthe guttata]                            |
| c42817.graph_c0 | 1.84452032    | 1.93777165    | 2.06519588    | 10.8350923     | 12.3874755     | 12.3656304     | 6.257E-16 | 1.584518  | up        | PREDICTED: probable glutamate carboxypeptidase 2 isoform X2 [Sesamum indicum]             |
| c42818.graph_c0 | 21.1990576    | 20.7275065    | 19.808499     | 141.556739     | 140.293031     | 140.811818     | 6.431E-36 | 1.758723  | up        | V-type proton ATPase subunit B2 -like protein [Gossypium arboreum]                        |
| c42819.graph_c0 | 14.4972572    | 13.2313234    | 15.7213166    | 12.7817        | 12.5163087     | 11.4537399     | 2.534E-13 | -1.259123 | down      | PREDICTED: uncharacterized protein At2g02148 isoform X1 [Sesamum indicum]                 |
| c42820.graph_c0 | 4.37690861    | 4.43107883    | 5.04926781    | 52.6260149     | 51.9403076     | 50.3326789     | 7.333E-58 | 2.464155  | up        | PREDICTED: glucosidase 2 subunit beta [Sesamum indicum]                                   |
| c42821.graph_c0 | 10.60605      | 9.49283359    | 9.56192334    | 8.46158498     | 8.96402327     | 8.6941637      | 5.604E-16 | -1.200991 | down      | PREDICTED: disease resistance protein RPS2 isoform X1 [Vitis vinifera]                    |
| c42822.graph_c0 | 16.7051912    | 17.6386214    | 17.1653496    | 2.82196869     | 6.93448526     | 8.10241083     | 1.088E-47 | -2.56069  | down      | PREDICTED: uncharacterized protein LOC105177905 [Sesamum indicum]                         |
| c42825.graph_c0 | 4.59922855    | 4.9293576     | 4.95500843    | 2.09715512     | 4.03529916     | 3.00850705     | 3.556E-07 | -1.691716 | down      | PREDICTED: protein SULFUR DEFICIENCY-INDUCED 1 [Sesamum indicum]                          |
| c42826.graph_c0 | 2.21721753    | 1.65104515    | 2.60598687    | 9.29154556     | 10.0543815     | 10.5505609     | 7.051E-07 | 1.18492   | up        | PREDICTED: B3 domain-containing protein Os01g0723500-like [Sesamum indicum]               |
| c42831.graph_c0 | 35.1806492    | 32.2477965    | 31.8210362    | 15.4301552     | 13.7653713     | 14.7807337     | 1.925E-32 | -2.189317 | down      | PREDICTED: uncharacterized protein LOC105163175 [Sesamum indicum]                         |
| c42834.graph_c0 | 15.5343019    | 15.1394041    | 12.7271646    | 11.6959652     | 7.71132787     | 6.52861462     | 1.921E-19 | -1.7482   | down      | PREDICTED: calmodulin-binding transcription activator 1 [Sesamum indicum]                 |
| c42838.graph_c0 | 0.80017006    | 0.84004308    | 0.62698183    | 18.2853835     | 20.4187504     | 21.1976865     | 6.26E-72  | 3.706541  | up        | PREDICTED: WD repeat-containing protein 44 [Sesamum indicum]                              |

| #ID             | 0 h-1<br>FPKM | 0 h-2<br>FPKM | 0 h-3<br>FPKM | 48 h-1<br>FPKM | 48 h-2<br>FPKM | 48 h-3<br>FPKM | FDR       | log2FC    | regulated | nr_annotation                                                                                    |
|-----------------|---------------|---------------|---------------|----------------|----------------|----------------|-----------|-----------|-----------|--------------------------------------------------------------------------------------------------|
| c42839.graph_c0 | 11.3705617    | 11.4394322    | 12.8405163    | 7.72421341     | 9.13566714     | 7.62615959     | 6.2E-11   | -1.562628 | down      | PREDICTED: probable complex I intermediate-associated protein 30-like [Citrus sinensis]          |
| c42843.graph_c0 | 0.03198604    | 0.16009036    | 0.28772332    | 2.00379877     | 2.37252086     | 1.83540833     | 6.27E-07  | 2.661333  | up        | Receptor-like protein kinase [Medicago truncatula]                                               |
| c42844.graph_c0 | 12.37926      | 13.5028642    | 13.6599923    | 8.46046417     | 11.1296753     | 9.70652267     | 5.708E-16 | -1.454977 | down      | PREDICTED: 5'-UTR; exoribonuclease 3 isoform X2 [Sesamum indicum]                                |
| c42847.graph_c0 | 71.487786     | 70.375624     | 70.0994816    | 57.8464577     | 58.7496377     | 56.5372697     | 1.36E-20  | -1.309194 | down      | PREDICTED: uncharacterized protein LOC105164616 [Sesamum indicum]                                |
| c42849.graph_c0 | 0.30173407    | 0.20135748    | 0.4523636     | 5.23523558     | 4.56448715     | 4.36971505     | 1.373E-08 | 2.869729  | up        | PREDICTED: monothiol glutaredoxin-S10-like [Sesamum indicum]                                     |
| c42851.graph_c0 | 10.3016933    | 9.7616489     | 8.99892214    | 7.6511232      | 8.67027611     | 8.20746167     | 6.175E-12 | -1.262807 | down      | hypothetical protein MIMGU_mgv1a008129mg [Erythranthe guttata]                                   |
| c42852.graph_c0 | 18.0885264    | 19.9161652    | 16.9767927    | 12.7679564     | 13.9699442     | 13.5976058     | 1.782E-25 | -1.464779 | down      | PREDICTED: E3 ubiquitin-protein ligase UPL4 isoform X1 [Sesamum indicum]                         |
| c42854.graph_c0 | 9.42569303    | 10.6269375    | 13.6423747    | 4.11326678     | 1.93666995     | 1.30131913     | 8.43E-15  | -3.19845  | down      | -                                                                                                |
| c42856.graph_c1 | 0             | 0.17761058    | 0             | 19.288607      | 11.082815      | 12.0721998     | 6.751E-10 | 6.905639  | up        | PREDICTED: uncharacterized protein LOC105158077 [Sesamum indicum]                                |
| c42859.graph_c0 | 44.975602     | 45.2581446    | 45.2945422    | 40.8029834     | 39.5722029     | 45.5773093     | 2.115E-15 | -1.123722 | down      | PREDICTED: soluble starch synthase 1, chloroplastic/amyloplastic-like, partial [Sesamum indicum] |
| c42860.graph_c1 | 0.61615193    | 0.46257668    | 0.79177962    | 5.72369671     | 4.51008791     | 6.14516523     | 2.597E-06 | 2.110884  | up        | hypothetical protein MIMGU_mgv1a007855mg [Erythranthe guttata]                                   |
| c42863.graph_c1 | 31.0968348    | 31.1681906    | 31.5451752    | 16.8041193     | 20.7427738     | 18.6737882     | 4.55E-30  | -1.75943  | down      | PREDICTED: uncharacterized protein LOC105166783 [Sesamum indicum]                                |
| c42865.graph_c0 | 11.4783505    | 11.0424521    | 10.9385955    | 7.74847171     | 10.9051001     | 13.3227894     | 1.564E-11 | -1.089969 | down      | PREDICTED: putative amidase C869.01 isoform X1 [Sesamum indicum]                                 |
| c42871.graph_c1 | 7.4223364     | 7.90910867    | 7.24750961    | 6.51932671     | 5.81594622     | 5.95351185     | 3.005E-11 | -1.318866 | down      | PREDICTED: uncharacterized protein LOC105178500 [Sesamum indicum]                                |
| c42875.graph_c0 | 1.02767578    | 0.85725404    | 0.88040271    | 0.35503573     | 0.62686218     | 0.70201925     | 0.0005664 | -1.74249  | down      | --                                                                                               |
| c42877.graph_c1 | 2.38608402    | 3.00172998    | 2.48611819    | 11.2584318     | 11.7695958     | 13.2952388     | 1.165E-06 | 1.18702   | up        | PREDICTED: protein DEK-like [Sesamum indicum]                                                    |
| c42878.graph_c0 | 13.7380393    | 14.3018677    | 12.2871314    | 10.6651077     | 10.1542478     | 9.9552269      | 1.603E-20 | -1.404962 | down      | PREDICTED: long chain acyl-CoA synthetase 4 [Sesamum indicum]                                    |
| c42882.graph_c0 | 0.3361044     | 0.37849608    | 0.10797687    | 3.52216975     | 5.20743511     | 5.51033928     | 9.456E-10 | 3.09856   | up        | PREDICTED: transcription factor DFLH110 [Sesamum indicum]                                        |
| c42883.graph_c0 | 0.49300285    | 0.41757398    | 0.29239762    | 3.03955503     | 3.51613562     | 3.60610372     | 2.313E-05 | 2.062871  | up        | PREDICTED: uncharacterized protein LOC101301730 isoform 2 [Fragaria vesca subsp. vesca]          |
| c42883.graph_c1 | 1.48822958    | 1.42891493    | 1.24893645    | 12.9270821     | 17.8742199     | 21.4861594     | 3.214E-12 | 2.626874  | up        | PREDICTED: uncharacterized protein At1g01500-like [Sesamum indicum]                              |
| c42886.graph_c0 | 3.60303267    | 3.66928692    | 3.03307807    | 16.1849137     | 15.6276859     | 15.9183159     | 1.258E-15 | 1.196538  | up        | PREDICTED: LOW QUALITY PROTEIN: translational activator GCN1 [Sesamum indicum]                   |



| #ID             | 0 h-1<br>FPKM | 0 h-2<br>FPKM | 0 h-3<br>FPKM | 48 h-1<br>FPKM | 48 h-2<br>FPKM | 48 h-3<br>FPKM | FDR       | log2FC    | regulated | nr_annotation                                                                                             |
|-----------------|---------------|---------------|---------------|----------------|----------------|----------------|-----------|-----------|-----------|-----------------------------------------------------------------------------------------------------------|
| c42887.graph_c0 | 10.0495079    | 10.9984642    | 9.03981086    | 49.9328938     | 54.7286742     | 57.0615059     | 6.793E-15 | 1.408267  | up        | -                                                                                                         |
| c42891.graph_c0 | 0.08844409    | 0             | 0             | 4.39994492     | 3.8843401      | 5.19589243     | 5.197E-22 | 6.255713  | up        | PREDICTED: uncharacterized protein LOC104093672 [Nicotiana tomentosiformis]                               |
| c42892.graph_c0 | 11.0482363    | 11.210108     | 10.7771332    | 5.64436097     | 6.61667758     | 7.53347768     | 8.518E-14 | -1.759946 | down      | PREDICTED: UDP-galactose/UDP-glucose transporter 5B-like [Sesamum indicum]                                |
| c42901.graph_c0 | 28.4815192    | 25.9411133    | 25.7039791    | 20.5137318     | 18.9324594     | 16.1286353     | 1.688E-26 | -1.541668 | down      | PREDICTED: MACPF domain-containing protein At4g24290-like [Sesamum indicum]                               |
| c42906.graph_c0 | 0.28900933    | 0.18081171    | 0.32496488    | 2.66254247     | 2.60909282     | 2.6060257      | 7.451E-06 | 2.289053  | up        | PREDICTED: ABC transporter G family member 24-like [Sesamum indicum]                                      |
| c42906.graph_c1 | 0.8511801     | 0.8848029     | 0.715177      | 4.43353484     | 4.24947899     | 4.45482189     | 0.0004521 | 1.40721   | up        | PREDICTED: ABC transporter G family member 24-like [Sesamum indicum]                                      |
| c42911.graph_c1 | 49.251218     | 48.519865     | 47.5584319    | 9.34030873     | 7.08098329     | 6.3155475      | 2.34E-132 | -3.686761 | down      | hypothetical protein MIMGU_mgv1a023461mg [Erythranthe guttata]                                            |
| c42916.graph_c0 | 40.1535778    | 39.1804968    | 38.6630692    | 27.614547      | 25.8513291     | 23.4187599     | 8.575E-26 | -1.63301  | down      | hypothetical protein MIMGU_mgv1a013052mg [Erythranthe guttata]                                            |
| c42917.graph_c0 | 3.8081908     | 4.12967113    | 3.4663538     | 2.83591928     | 3.87153686     | 4.08423996     | 0.0001514 | -1.101805 | down      | PREDICTED: uncharacterized protein LOC105168516 isoform X1 [Sesamum indicum]                              |
| c42919.graph_c0 | 18.8064427    | 18.8478197    | 16.6709048    | 10.0426937     | 10.4192019     | 10.0621509     | 9.512E-34 | -1.848235 | down      | PREDICTED: pentatricopeptide repeat-containing protein At4g02820, mitochondrial [Sesamum indicum]         |
| c42920.graph_c0 | 1.18665484    | 0.67006534    | 0.54739944    | 14.8286003     | 13.6006987     | 13.6433581     | 4.186E-29 | 3.119795  | up        | PREDICTED: uncharacterized protein LOC105169238 [Sesamum indicum]                                         |
| c42921.graph_c0 | 0.31391227    | 0.25138128    | 0.32271175    | 5.08985764     | 6.37246645     | 9.16077955     | 1.408E-09 | 3.512207  | up        | PREDICTED: protein notum homolog isoform X1 [Sesamum indicum]                                             |
| c42922.graph_c0 | 2.42333975    | 2.10936205    | 2.03092665    | 16.3072388     | 17.5223356     | 21.9551375     | 2.894E-20 | 2.068174  | up        | PREDICTED: root phototropism protein 3-like [Sesamum indicum]                                             |
| c42923.graph_c1 | 0.07122728    | 0.3208437     | 0.09152987    | 1.73890915     | 2.01595238     | 2.91937906     | 1.021E-06 | 2.768365  | up        | PREDICTED: phosphate transporter PHO1 homolog 1 [Sesamum indicum]                                         |
| c42925.graph_c0 | 11.7413575    | 12.8380176    | 13.7948428    | 5.77694015     | 3.82812788     | 4.33645578     | 4.91E-43  | -2.472315 | down      | PREDICTED: formin-like protein 5 [Sesamum indicum]                                                        |
| c42926.graph_c0 | 6.04886106    | 5.17636134    | 5.94407867    | 29.3709082     | 26.9477396     | 25.9007177     | 7.04E-15  | 1.243852  | up        | PREDICTED: neutral ceramidase isoform A1 [Sesamum indicum]                                                |
| c42928.graph_c0 | 15.591991     | 15.8634664    | 15.4583538    | 1.56006359     | 1.90216209     | 2.26554141     | 3.01E-128 | -4.056183 | down      | PREDICTED: probably inactive leucine-rich repeat receptor-like protein kinase At5g06940 [Sesamum indicum] |
| c42929.graph_c0 | 2.4391503     | 1.05432414    | 2.49327647    | 0              | 0.21641224     | 0.13632681     | 7.055E-08 | -5.136255 | down      | PREDICTED: mitochondrial phosphate carrier protein 3, mitochondrial-like [Sesamum indicum]                |
| c42932.graph_c0 | 18.6742762    | 21.0004891    | 22.1219796    | 8.70914008     | 12.4668274     | 11.7713695     | 1.285E-30 | -1.932334 | down      | PREDICTED: sulfate transporter 4.1, chloroplastic [Sesamum indicum]                                       |
| c42935.graph_c0 | 79.7319639    | 76.3232277    | 78.9194378    | 501.53302      | 479.256402     | 485.072434     | 1.165E-28 | 1.624495  | up        | glutamine synthetase [Hevea brasiliensis]                                                                 |

| #ID             | 0 h-1<br>FPKM | 0 h-2<br>FPKM | 0 h-3<br>FPKM | 48 h-1<br>FPKM | 48 h-2<br>FPKM | 48 h-3<br>FPKM | FDR       | log2FC    | regulated | nr_annotation                                                                                              |
|-----------------|---------------|---------------|---------------|----------------|----------------|----------------|-----------|-----------|-----------|------------------------------------------------------------------------------------------------------------|
| c42937.graph_c0 | 23.8166415    | 23.4105015    | 23.4599954    | 20.5343771     | 17.4914514     | 15.3956793     | 2.559E-22 | -1.417119 | down      | hypothetical protein MIMGU_mgv1a002036mg<br>[Erythranthe guttata]                                          |
| c42939.graph_c0 | 32.9914529    | 34.189712     | 30.9396865    | 21.2173434     | 21.5136884     | 21.1861031     | 2.922E-31 | -1.635093 | down      | PREDICTED: protein transport protein SEC16B homolog<br>[Sesamum indicum]                                   |
| c42942.graph_c1 | 14.6034759    | 14.7327509    | 13.0258428    | 5.2759508      | 3.9124611      | 4.83534458     | 9.322E-28 | -2.606935 | down      | PREDICTED: uncharacterized protein LOC105166066<br>[Sesamum indicum]                                       |
| c42944.graph_c0 | 32.155664     | 32.6903622    | 32.2542682    | 30.1891385     | 29.6137225     | 26.2219954     | 7.759E-17 | -1.190798 | down      | PREDICTED: uncharacterized protein LOC105162695<br>[Sesamum indicum]                                       |
| c42945.graph_c0 | 111.577083    | 104.961575    | 115.648847    | 35.5330668     | 34.0171912     | 35.1415272     | 6.782E-76 | -2.683304 | down      | PREDICTED: cell division cycle protein 48 homolog<br>[Solanum lycopersicum]                                |
| c42945.graph_c1 | 100.088888    | 104.116071    | 109.249175    | 36.5695044     | 33.0482015     | 33.1740324     | 8.334E-73 | -2.624788 | down      | PREDICTED: cell division cycle protein 48 homolog<br>[Sesamum indicum]                                     |
| c42947.graph_c0 | 2.72746655    | 2.1234871     | 2.53131848    | 11.2141767     | 11.682881      | 11.8000726     | 7.836E-05 | 1.214319  | up        | PREDICTED: 39S ribosomal protein L45, mitochondrial<br>[Sesamum indicum]                                   |
| c42950.graph_c0 | 0.05386135    | 0.16174586    | 0             | 7.56714004     | 9.85631227     | 9.49270215     | 1.637E-40 | 5.955955  | up        | hypothetical protein CISIN_1g0086311mg, partial [Citrus<br>sinensis]                                       |
| c42952.graph_c0 | 14.3514206    | 14.0426346    | 13.1998984    | 71.1363472     | 75.847269      | 79.9689133     | 1.512E-23 | 1.429721  | up        | hypothetical protein MIMGU_mgv1a007743mg<br>[Erythranthe guttata]                                          |
| c42953.graph_c0 | 0.78871099    | 0.48056568    | 0.44066298    | 9.38277248     | 11.1447473     | 9.72613517     | 9.259E-20 | 3.129962  | up        | hypothetical protein CICLE_v10018905mg [Citrus<br>clamantinal]                                             |
| c42957.graph_c0 | 0.1154822     | 0.23119568    | 0.2967984     | 3.83003046     | 6.87512846     | 5.55367686     | 5.123E-12 | 3.625612  | up        | PREDICTED: putative pectate lyase 2 [Sesamum indicum]                                                      |
| c42958.graph_c0 | 1.40473928    | 1.32802669    | 1.50428799    | 7.5491351      | 7.95931044     | 6.94108085     | 4.624E-05 | 1.387149  | up        | hypothetical protein MIMGU_mgv1a008941mg<br>[Erythranthe guttata]                                          |
| c42960.graph_c0 | 0.39332024    | 0.31497127    | 0.40434566    | 3.1162294      | 5.45092954     | 4.7717991      | 4.401E-06 | 2.556001  | up        | PREDICTED: SEC14 cytosolic factor [Sesamum indicum]                                                        |
| c42961.graph_c0 | 49.3736662    | 49.5166223    | 50.1214207    | 44.5395082     | 39.4797337     | 37.0272116     | 1.104E-19 | -1.31453  | down      | PREDICTED: LOW QUALITY PROTEIN: serine/arginine-<br>rich SC35-like splicing factor SCL28 [Sesamum indicum] |
| c42963.graph_c0 | 20.3407552    | 20.31743      | 19.8283732    | 16.7084769     | 17.6580046     | 17.2465543     | 2.047E-17 | -1.246905 | down      | PREDICTED: ubiquitin carboxyl-terminal hydrolase 25<br>isoform X1 [Sesamum indicum]                        |
| c42964.graph_c0 | 0.77642246    | 0.24543156    | 0.57763524    | 5.4964467      | 5.224584       | 6.49860831     | 1.695E-08 | 2.410364  | up        | PREDICTED: uncharacterized protein LOC105168903<br>[Sesamum indicum]                                       |
| c42966.graph_c0 | 2.16349917    | 4.84089956    | 3.10726234    | 15.8280079     | 16.5194425     | 16.5874292     | 0.0016738 | 1.256597  | up        | NAD(P)H-quinone oxidoreductase subunit H [Medicago<br>truncatula]                                          |
| c42978.graph_c0 | 24.9943599    | 26.39646      | 23.8953906    | 20.3350331     | 19.1287762     | 18.3727491     | 2.527E-23 | -1.395604 | down      | PREDICTED: uncharacterized protein LOC105176008<br>[Sesamum indicum]                                       |
| c42979.graph_c0 | 103.278708    | 97.5754529    | 92.6361014    | 81.1825091     | 67.6246078     | 60.5269763     | 3.643E-26 | -1.499403 | down      | PREDICTED: heterogeneous nuclear ribonucleoprotein A2<br>homolog 1 [Sesamum indicum]                       |
| c42981.graph_c0 | 1.03973855    | 0.59473125    | 0.71577064    | 16.8312316     | 16.9971024     | 16.9853483     | 1.115E-32 | 3.419056  | up        | PREDICTED: petal death protein [Sesamum indicum]                                                           |

| #ID             | 0 h-1<br>FPKM | 0 h-2<br>FPKM | 0 h-3<br>FPKM | 48 h-1<br>FPKM | 48 h-2<br>FPKM | 48 h-3<br>FPKM | FDR       | log2FC    | regulated | nr_annotation                                                                                    |
|-----------------|---------------|---------------|---------------|----------------|----------------|----------------|-----------|-----------|-----------|--------------------------------------------------------------------------------------------------|
| c42985.graph_c1 | 2.03857477    | 1.90636504    | 1.65451534    | 23.3522935     | 32.0951535     | 37.5776192     | 6.603E-17 | 3.031964  | up        | PREDICTED: protein NSP-INTERACTING KINASE 3 [Sesamum indicum]                                    |
| c42986.graph_c0 | 72.7450531    | 62.785977     | 70.1657158    | 47.0395905     | 39.6300996     | 47.3088053     | 1.975E-26 | -1.6342   | down      | thioredoxin peroxidase, partial [Fargesia spathacea]                                             |
| c42986.graph_c1 | 0.1851051     | 0.92645228    | 0.23786738    | 62.1755634     | 31.1452328     | 15.0826939     | 0.000533  | 5.335608  | up        | PREDICTED: cytochrome P450 CYP82D47-like [Sesamum indicum]                                       |
| c42991.graph_c0 | 13.3872175    | 13.211119     | 10.9474301    | 66.6988227     | 79.2376779     | 94.5314805     | 4.099E-14 | 1.659264  | up        | PREDICTED: proline transporter 3 [Sesamum indicum]                                               |
| c42996.graph_c0 | 0.12918691    | 0.25863253    | 0.16601029    | 4.76061613     | 8.25839644     | 6.40690101     | 1.471E-12 | 4.107238  | up        | -                                                                                                |
| c42998.graph_c0 | 3.10135118    | 3.79433598    | 2.9386991     | 22.5687332     | 29.6261666     | 27.040721      | 2.571E-26 | 1.98976   | up        | PREDICTED: exocyst complex component EXO70B1 [Sesamum indicum]                                   |
| c43001.graph_c0 | 11.0073657    | 12.6099328    | 11.0539779    | 53.520378      | 47.1093666     | 42.5089997     | 1.185E-07 | 1.032034  | up        | aldose 1-epimerase, putative [Ricinus communis]                                                  |
| c43008.graph_c0 | 6.22339052    | 5.33592121    | 6.20887676    | 34.5938919     | 38.3651094     | 38.5306099     | 2.179E-25 | 1.629567  | up        | PREDICTED: uncharacterized protein LOC105169979 [Sesamum indicum]                                |
| c43010.graph_c0 | 8.68574599    | 9.40816642    | 7.37160584    | 60.9993736     | 92.3615292     | 95.1107271     | 1.225E-12 | 2.26345   | up        | hypothetical protein MIMGU_mgv1a004602mg [Erythranthe guttata]                                   |
| c43011.graph_c0 | 11.4300259    | 12.139122     | 9.7323164     | 7.02005692     | 7.93571548     | 6.24640443     | 2.591E-14 | -1.667525 | down      | PREDICTED: uncharacterized protein LOC105158337 [Sesamum indicum]                                |
| c43012.graph_c0 | 0.67954997    | 0.71511405    | 0.49260178    | 6.40492965     | 8.0266573      | 8.09867541     | 2.778E-21 | 2.559283  | up        | PREDICTED: neat snock 70 kDa protein 10 [Sesamum indicum]                                        |
| c43015.graph_c0 | 3.93982718    | 3.38437199    | 3.91382196    | 14.2095988     | 17.2622619     | 19.4235253     | 1.536E-09 | 1.156746  | up        | PREDICTED: protein PHLOEM PROTEIN 2-LIKE A9 [Sesamum indicum]                                    |
| c43017.graph_c0 | 1.24395948    | 0.96849287    | 0.8436724     | 12.6380165     | 14.4676155     | 17.136939      | 2.568E-24 | 2.837679  | up        | hypothetical protein MIMGU_mgv1a007209mg [Erythranthe guttata]                                   |
| c43022.graph_c1 | 16.1807069    | 13.1064646    | 14.0052983    | 62.4711614     | 70.1739657     | 73.4851221     | 5.316E-17 | 1.232224  | up        | PREDICTED: eukaryotic translation initiation factor 3 subunit M [Sesamum indicum]                |
| c43024.graph_c0 | 2.52998112    | 2.85193076    | 2.31386438    | 9.55411305     | 13.5916269     | 14.3118974     | 2.269E-07 | 1.260378  | up        | PREDICTED: uncharacterized protein LOC105166682 isoform X3 [Sesamum indicum]                     |
| c43027.graph_c0 | 0             | 0.22369319    | 0.04102386    | 7.99969884     | 7.94504148     | 7.37977818     | 5.047E-29 | 5.449306  | up        | PREDICTED: phototropin-2 isoform A1 [Sesamum indicum]                                            |
| c43030.graph_c0 | 6.81193458    | 6.97372742    | 6.56520422    | 100.552202     | 104.860807     | 103.938355     | 5.167E-38 | 2.908419  | up        | Succinyl-CoA ligase [ADP-forming] subunit alpha-1 [Morus notabilis]                              |
| c43030.graph_c1 | 5.46072553    | 6.41901636    | 4.18459773    | 80.8616559     | 77.2043753     | 73.5107792     | 2.355E-62 | 2.836738  | up        | hypothetical protein M569_06331, partial [Genlisea aurea]                                        |
| c43031.graph_c0 | 2.40877652    | 2.15051951    | 2.09146838    | 13.1947797     | 12.8981302     | 15.636392      | 1.133E-06 | 1.632053  | up        | PREDICTED: serine protease SPPA, chloroplastic-like [Sesamum indicum]                            |
| c43032.graph_c0 | 0             | 0             | 0.03968561    | 1.36565952     | 1.23576619     | 1.9746279      | 6.096E-12 | 5.797392  | up        | Protein kinase G11A [Glycine soja]                                                               |
| c43035.graph_c0 | 21.437088     | 22.8353196    | 22.6108961    | 21.7591225     | 18.9315685     | 18.5447029     | 9.349E-13 | -1.190005 | down      | PREDICTED: uncharacterized protein LOC105155972 [Sesamum indicum]                                |
| c43040.graph_c0 | 11.0554949    | 12.5801538    | 11.8177214    | 6.75958011     | 6.48356781     | 6.8680615      | 3.206E-26 | -1.835187 | down      | PREDICTED: mitogen-activated protein kinase kinase kinase YODA-like isoform X5 [Sesamum indicum] |

| #ID             | 0 h-1<br>FPKM | 0 h-2<br>FPKM | 0 h-3<br>FPKM | 48 h-1<br>FPKM | 48 h-2<br>FPKM | 48 h-3<br>FPKM | FDR       | log2FC    | regulated | nr_annotation                                                                                                                                |
|-----------------|---------------|---------------|---------------|----------------|----------------|----------------|-----------|-----------|-----------|----------------------------------------------------------------------------------------------------------------------------------------------|
| c43041.graph_c0 | 5.45498038    | 4.247011      | 4.15399452    | 19.1712898     | 23.0208975     | 23.1449043     | 1.241E-07 | 1.218567  | up        | PREDICTED: uncharacterized protein LOC105157371 [Sesamum indicum]                                                                            |
| c43042.graph_c0 | 0.40868792    | 0.88113234    | 0.82816871    | 5.82142335     | 7.5324434      | 7.74403075     | 1.079E-19 | 2.290063  | up        | hypothetical protein MIMGU_mgv1a000774mg [Erythranthe guttata]                                                                               |
| c43044.graph_c1 | 61.4178725    | 66.468645     | 55.7393634    | 38.2527212     | 40.0416898     | 53.9932828     | 9.533E-26 | -1.492415 | down      | PREDICTED: uncharacterized protein LOC100243914 [Vitis vinifera]                                                                             |
| c43045.graph_c0 | 19.9331374    | 18.370342     | 20.5518534    | 14.5190292     | 17.2784968     | 18.2735076     | 2.942E-16 | -1.25494  | down      | PREDICTED: putative MO25-like protein At5g47540 [Sesamum indicum]                                                                            |
| c43047.graph_c0 | 16.9779486    | 17.8855145    | 16.767909     | 64.1812591     | 76.3616531     | 77.5284471     | 4.153E-14 | 1.058025  | up        | PREDICTED: putative serine/threonine-protein kinase {ECO:0000250 UniProtKB:Q9FE20, ECO:0000303 Ref.2} isoform X1 [Nicotiana tomentosiformis] |
| c43050.graph_c0 | 11.7228524    | 13.0100901    | 11.2436662    | 6.57382555     | 7.25434485     | 8.04285686     | 6.023E-17 | -1.737251 | down      | PREDICTED: putative vesicle-associated membrane protein 726 [Pyrus x bretschneideri]                                                         |
| c43052.graph_c0 | 56.9464359    | 55.611655     | 55.3110811    | 52.9083148     | 52.9229472     | 51.0914767     | 2.357E-14 | -1.114203 | down      | PLAC8 family protein isoform 1 [Theobroma cacao]                                                                                             |
| c43053.graph_c0 | 19.8850525    | 21.5596558    | 20.7423533    | 12.4070314     | 15.848415      | 16.1410805     | 9.017E-18 | -1.508393 | down      | PREDICTED: F-box protein PP2-A15 [Sesamum indicum]                                                                                           |
| c43055.graph_c0 | 0             | 0.13478323    | 0.06921141    | 0.84351886     | 1.44553904     | 1.6114922      | 4.993E-07 | 3.226223  | up        | PREDICTED: uncharacterized protein LOC105175800 [Sesamum indicum]                                                                            |
| c43056.graph_c0 | 0.06354077    | 0             | 0             | 1.87321272     | 2.26350386     | 3.35959016     | 6.004E-12 | 5.879798  | up        | PREDICTED: flap endonuclease GEN-like 2 isoform X2 [Sesamum indicum]                                                                         |
| c43058.graph_c0 | 0.48554697    | 0.22872149    | 0.33032492    | 3.89429387     | 4.12553214     | 4.98696219     | 8.828E-10 | 2.62027   | up        | unnamed protein product [Coffea canephora]                                                                                                   |
| c43063.graph_c0 | 2.19149854    | 2.48342603    | 1.85972988    | 23.1227075     | 22.4375813     | 24.2351383     | 2.983E-25 | 2.401695  | up        | PREDICTED: uncharacterized protein LOC105177601 [Sesamum indicum]                                                                            |
| c43066.graph_c1 | 1.61440524    | 2.50098616    | 1.87699612    | 14.6250715     | 13.6552792     | 14.3366872     | 8.218E-12 | 1.814052  | up        | PREDICTED: zinc finger CCCH domain-containing protein 67 isoform X1 [Sesamum indicum]                                                        |
| c43072.graph_c0 | 6.42113669    | 8.38467807    | 6.82328537    | 50.2444241     | 47.3627657     | 44.3529031     | 6.749E-30 | 1.699148  | up        | PREDICTED: phosphatidylinositol 4-phosphate 5-kinase 9-like [Sesamum indicum]                                                                |
| c43077.graph_c0 | 1.35488899    | 0.96874693    | 0.64668908    | 4.70754282     | 6.57386605     | 8.37748658     | 6.18E-05  | 1.707712  | up        | PREDICTED: microtubule-associated protein TORTIFOLIA1-like [Sesamum indicum]                                                                 |
| c43079.graph_c0 | 0.39530079    | 0.49462079    | 0.38098288    | 9.0680042      | 10.0694124     | 10.5475799     | 5.687E-37 | 3.527332  | up        | PREDICTED: ATP-dependent DNA helicase DDM1 [Sesamum indicum]                                                                                 |
| c43088.graph_c0 | 1.5536107     | 1.43553822    | 1.68930491    | 0              | 0              | 0              | 4.063E-20 | -Inf      | down      | PREDICTED: putative clathrin assembly protein At5g57200 [Sesamum indicum]                                                                    |
| c43090.graph_c0 | 0.19142737    | 0.22994287    | 0.04919835    | 2.32789101     | 1.64407883     | 1.4122796      | 4.358E-05 | 2.518133  | up        | hypothetical protein MIMGU_mgv1a018481mg, partial [Erythranthe guttata]                                                                      |
| c43092.graph_c0 | 1.5705004     | 2.37935376    | 1.36361837    | 7.97721272     | 11.9720936     | 11.1342367     | 1.46E-06  | 1.527193  | up        | PREDICTED: uncharacterized protein LOC105160850 [Sesamum indicum]                                                                            |

| #ID             | 0 h-1<br>FPKM | 0 h-2<br>FPKM | 0 h-3<br>FPKM | 48 h-1<br>FPKM | 48 h-2<br>FPKM | 48 h-3<br>FPKM | FDR       | log2FC    | regulated | nr_annotation                                                                                     |
|-----------------|---------------|---------------|---------------|----------------|----------------|----------------|-----------|-----------|-----------|---------------------------------------------------------------------------------------------------|
| c43096.graph_c0 | 0             | 0.08865349    | 0.11380928    | 7.13927182     | 7.99537526     | 9.07497305     | 1.099E-24 | 5.867991  | up        | PREDICTED: uncharacterized protein LOC104227860 [Nicotiana sylvestris]                            |
| c43097.graph_c0 | 30.9847032    | 34.7956099    | 31.574075     | 28.354511      | 25.8984526     | 26.1201324     | 1.379E-16 | -1.291976 | down      | PREDICTED: uncharacterized protein LOC105164803 [Sesamum indicum]                                 |
| c43099.graph_c0 | 5.5004032     | 5.26800128    | 6.37013851    | 0.07819954     | 0              | 0.02783259     | 2.03E-113 | -8.319476 | down      | PREDICTED: putative RING-H2 finger protein ATL21A [Sesamum indicum]                               |
| c43104.graph_c0 | 1.4032262     | 1.66001883    | 0.88520788    | 5.31200058     | 6.15032241     | 6.6715973      | 0.000169  | 1.183623  | up        | hypothetical protein MIMGU_mgv1a007414mg [Erythranthe guttata]                                    |
| c43107.graph_c0 | 5.90546584    | 6.1268983     | 6.8773114     | 5.89387534     | 5.79356888     | 4.21059576     | 4.67E-08  | -1.266555 | down      | PREDICTED: secretory carrier-associated membrane protein 2 [Sesamum indicum]                      |
| c43108.graph_c0 | 26.367832     | 27.9986795    | 23.2660393    | 23.8966096     | 17.6922496     | 17.0807693     | 1.129E-19 | -1.413521 | down      | PREDICTED: U-box domain-containing protein 32 isoform X3 [Sesamum indicum]                        |
| c43111.graph_c0 | 5.14040189    | 5.74521849    | 5.56262732    | 23.6605642     | 30.0823707     | 30.0667018     | 4.372E-18 | 1.326892  | up        | PREDICTED: alpha-mannosidase [Sesamum indicum]                                                    |
| c43115.graph_c0 | 0             | 0.06908632    | 0             | 3.56065677     | 4.88350173     | 4.97868011     | 3.727E-20 | 6.590441  | up        | PREDICTED: MLO-like protein 4 [Sesamum indicum]                                                   |
| c43116.graph_c0 | 1.82084575    | 1.57249879    | 2.20222012    | 11.4792387     | 12.8229141     | 12.5847786     | 1.598E-10 | 1.698619  | up        | PREDICTED: tRNA (adenine(58)-N(1))-methyltransferase non-catalytic subunit trm6 [Sesamum indicum] |
| c43119.graph_c0 | 1.34189086    | 1.46534679    | 1.61987482    | 1.64831651     | 0.63497872     | 1.36666243     | 0.005954  | -1.286185 | down      | hypothetical protein CICLE_v10024008mg, partial [Citrus clementina]                               |
| c43121.graph_c0 | 32.1974152    | 30.7545123    | 30.9881758    | 14.440344      | 14.6004581     | 12.9953578     | 4.867E-42 | -2.176614 | down      | PREDICTED: transcription factor bHLH47 isoform X3 [Sesamum indicum]                               |
| c43123.graph_c0 | 14.8565587    | 14.3694459    | 13.6941571    | 52.7260616     | 70.7234836     | 80.2134        | 2.077E-07 | 1.223556  | up        | PREDICTED: GDSL esterase/lipase At4g01130-like [Sesamum indicum]                                  |
| c43123.graph_c2 | 11.8304575    | 14.1036484    | 8.40345069    | 40.035985      | 52.1607812     | 56.6764085     | 5.746E-06 | 1.097403  | up        | hypothetical protein MIMGU_mgv1a003725mg [Erythranthe guttata]                                    |
| c43124.graph_c0 | 157.487903    | 165.811311    | 167.884458    | 87.8848413     | 84.63054       | 85.050031      | 9.331E-38 | -1.948537 | down      | PREDICTED: putative DNA-binding protein ESCAROLA [Sesamum indicum]                                |
| c43126.graph_c0 | 6.43366295    | 7.19186856    | 7.84931064    | 5.62729505     | 5.98586888     | 5.52015925     | 2.657E-11 | -1.345592 | down      | PREDICTED: uncharacterized protein LOC105159445 [Sesamum indicum]                                 |
| c43128.graph_c0 | 8.88543989    | 7.97590031    | 9.21518529    | 4.35985318     | 6.22115432     | 6.33366717     | 2.504E-18 | -1.649286 | down      | PREDICTED: transmembrane protein 25-B [Sesamum indicum]                                           |
| c43139.graph_c0 | 76.7318865    | 76.2418678    | 74.1527519    | 54.7263832     | 24.1520473     | 18.6610802     | 2.278E-25 | -2.217078 | down      | PREDICTED: transcription factor bHLH112 isoform X1 [Sesamum indicum]                              |
| c43140.graph_c0 | 0.67926502    | 0.60439573    | 0.43644122    | 20.3379552     | 16.6840267     | 20.3857316     | 1.714E-43 | 4.049596  | up        | PREDICTED: uncharacterized protein LOC102583254 [Solanum tuberosum]                               |
| c43141.graph_c0 | 15.0176196    | 13.9518782    | 15.2304704    | 13.9482435     | 15.2554507     | 15.5289153     | 2.072E-10 | -1.002415 | down      | hypothetical protein MIMGU_mgv1a005112mg [Erythranthe guttata]                                    |
| c43142.graph_c0 | 1.80162025    | 1.3917731     | 1.81185914    | 0.59535231     | 1.12762156     | 1.13974559     | 7.396E-07 | -1.835454 | down      | PREDICTED: protein WEAK CHLOROPLAST MOVEMENT UNDER BLUE LIGHT 1 isoform X1 [Sesamum indicum]      |

| #ID             | 0 h-1<br>FPKM | 0 h-2<br>FPKM | 0 h-3<br>FPKM | 48 h-1<br>FPKM | 48 h-2<br>FPKM | 48 h-3<br>FPKM | FDR       | log2FC    | regulated | nr_annotation                                                                                          |
|-----------------|---------------|---------------|---------------|----------------|----------------|----------------|-----------|-----------|-----------|--------------------------------------------------------------------------------------------------------|
| c43143.graph_c0 | 12.2106154    | 11.1086055    | 13.263768     | 8.98072716     | 6.74867906     | 8.15690008     | 4.564E-18 | -1.629636 | down      | PREDICTED: vacuolar amino acid transporter 1-like isoform X1 [Eucalyptus grandis]                      |
| c43145.graph_c0 | 0.45424319    | 0.86392628    | 0.58372048    | 16.1532682     | 12.5018264     | 15.5273957     | 3.881E-25 | 3.524044  | up        | PREDICTED: G2/mitotic-specific cyclin-2-like [Sesamum indicum]                                         |
| c43146.graph_c0 | 81.3470457    | 80.5463857    | 78.0199031    | 54.3100024     | 67.707263      | 59.6835122     | 8.522E-24 | -1.421214 | down      | hypothetical protein MIMGU_mgv1a000959mg [Erythranthe guttata]                                         |
| c43150.graph_c0 | 42.3389847    | 41.5084378    | 46.338634     | 15.4655944     | 15.4689757     | 15.5841042     | 1.942E-66 | -2.50325  | down      | PREDICTED: patellin-3 [Sesamum indicum]                                                                |
| c43151.graph_c0 | 7.89256139    | 6.96094989    | 6.46911328    | 10.0616889     | 4.74664798     | 3.42725533     | 0.0006201 | -1.222829 | down      | PREDICTED: F-box protein At1g01540-like [Sesamum indicum]                                              |
| c43153.graph_c0 | 0.28949557    | 0.28978546    | 0.12400442    | 2.35586945     | 3.2491944      | 3.75740858     | 1.329E-06 | 2.718202  | up        | PREDICTED: uncharacterized protein LOC105157169 [Sesamum indicum]                                      |
| c43154.graph_c0 | 69.1316805    | 72.8231992    | 59.0470216    | 46.0127658     | 49.2599869     | 44.5571277     | 1.799E-28 | -1.539658 | down      | PREDICTED: homeobox protein knotted-1-like LET12 isoform X1 [Sesamum indicum]                          |
| c43159.graph_c1 | 0.5095856     | 0.53328205    | 0.68460302    | 8.77043162     | 10.9188659     | 11.1646712     | 3.45E-29  | 3.133904  | up        | PREDICTED: endonuclease 4-like [Sesamum indicum]                                                       |
| c43163.graph_c0 | 0.99496473    | 0.89433236    | 1.04372985    | 20.6521541     | 23.68184       | 23.4029751     | 1.035E-71 | 3.508613  | up        | hypothetical protein SELMODRAFT_91337 [Selaginella moellendorffii]                                     |
| c43164.graph_c0 | 59.0424375    | 54.8653309    | 56.4947116    | 30.4710955     | 33.3631286     | 31.626217      | 6.842E-38 | -1.854521 | down      | PREDICTED: F-box protein SKP2A-like [Sesamum indicum]                                                  |
| c43165.graph_c0 | 3.44385889    | 2.99680699    | 3.09281754    | 14.2591567     | 14.914876      | 14.0992399     | 1.265E-10 | 1.165205  | up        | PREDICTED: uncharacterized protein LOC105161979 [Sesamum indicum]                                      |
| c43166.graph_c1 | 14.8243822    | 14.4805746    | 14.8485767    | 14.2760936     | 10.8401733     | 11.3811055     | 5.666E-12 | -1.287133 | down      | PREDICTED: syntaxin-81 [Sesamum indicum]                                                               |
| c43167.graph_c0 | 9.03897159    | 7.95870306    | 8.59028586    | 6.03575088     | 8.45327801     | 7.70085816     | 4.668E-12 | -1.228456 | down      | hypothetical protein MIMGU_mgv1a016655mg [Erythranthe guttata]                                         |
| c43168.graph_c0 | 1.51507641    | 2.21655977    | 2.54598953    | 12.9915578     | 15.4691348     | 12.7062375     | 9.615E-08 | 1.68976   | up        | PREDICTED: annexin D5 [Sesamum indicum]                                                                |
| c43170.graph_c0 | 40.7768342    | 46.7402294    | 36.9881269    | 2.79905611     | 2.65312786     | 2.35949996     | 3.038E-68 | -5.008324 | down      | PREDICTED: nyoscyamine O-methoxygenase [Sesamum indicum]                                               |
| c43170.graph_c1 | 36.9351945    | 38.3454319    | 29.1559579    | 1.21525394     | 1.02993135     | 1.55710893     | 2.533E-94 | -5.794815 | down      | hypothetical protein MIMGU_mgv1a019348mg [Erythranthe guttata]                                         |
| c43172.graph_c0 | 102.133094    | 104.588501    | 106.484902    | 10.8671428     | 10.2833361     | 9.29099628     | 5.65E-175 | -4.378908 | down      | PREDICTED: RING-H2 finger protein ATL47 [Sesamum indicum]                                              |
| c43177.graph_c0 | 1.50481999    | 1.25527237    | 0.87479314    | 23.7988079     | 28.6038504     | 30.5158136     | 8.226E-54 | 3.495276  | up        | PREDICTED: formin-like protein 1 [Sesamum indicum]                                                     |
| c43181.graph_c0 | 38.8984659    | 43.7248041    | 39.8015535    | 40.32577       | 32.8959365     | 25.4270431     | 1.081E-16 | -1.322586 | down      | hypothetical protein MIMGU_mgv1a021597mg [Erythranthe guttata]                                         |
| c43181.graph_c1 | 3.18198331    | 2.81429368    | 3.24877429    | 0.72282343     | 0.97845038     | 1.46498453     | 3.286E-16 | -2.572317 | down      | PREDICTED: nodulation-signaling pathway 2 protein-like [Sesamum indicum]                               |
| c43182.graph_c0 | 0.29576804    | 0.70315248    | 0.28505523    | 4.73435401     | 6.56702351     | 8.12213473     | 4.122E-10 | 2.8983    | up        | PREDICTED: rho GTPase-activating protein 5-like [Sesamum indicum]                                      |
| c43183.graph_c1 | 18.9229477    | 20.0018218    | 19.400718     | 6.16765077     | 6.36719756     | 5.87993418     | 1.052E-53 | -2.680744 | down      | PREDICTED: pentatricopeptide repeat-containing protein At5g42310, mitochondrial-like [Sesamum indicum] |

| #ID             | 0 h-1<br>FPKM | 0 h-2<br>FPKM | 0 h-3<br>FPKM | 48 h-1<br>FPKM | 48 h-2<br>FPKM | 48 h-3<br>FPKM | FDR       | log2FC    | regulated | nr_annotation                                                                                               |
|-----------------|---------------|---------------|---------------|----------------|----------------|----------------|-----------|-----------|-----------|-------------------------------------------------------------------------------------------------------------|
| c43183.graph_c2 | 3.6544276     | 2.48749913    | 3.6159848     | 18.6851687     | 18.8316866     | 19.1722676     | 1.126E-12 | 1.51946   | up        | PREDICTED: O-glucosyltransferase rumi homolog [Beta vulgaris subsp. vulgaris]                               |
| c43185.graph_c0 | 198.038236    | 182.61301     | 204.596862    | 36.489148      | 33.9307266     | 30.2377877     | 3.36E-110 | -3.555348 | down      | PREDICTED: poly [ADP-ribose] polymerase 3 [Sesamum indicum]                                                 |
| c43191.graph_c0 | 1.5130821     | 1.80309193    | 1.6666032     | 8.47433047     | 8.2274451      | 9.41074455     | 5.65E-08  | 1.371469  | up        | hypothetical protein MIMGU_mgv1a002186mg [Erythranthe guttata]                                              |
| c43192.graph_c0 | 1.89631175    | 2.24333982    | 2.52544788    | 12.29257       | 16.6566698     | 18.0319157     | 9.731E-13 | 1.791381  | up        | PREDICTED: heparan-alpha-glucosaminide N-acetyltransferase-like [Sesamum indicum]                           |
| c43193.graph_c0 | 3.62297285    | 3.98331553    | 2.97657177    | 3.4471523      | 3.45862083     | 3.26200176     | 5.285E-06 | -1.072353 | down      | PREDICTED: rho GTPase-activating protein 7-like [Sesamum indicum]                                           |
| c43196.graph_c0 | 0.71781438    | 0.42458778    | 0.3773536     | 4.62908201     | 3.37544685     | 3.95845157     | 7.122E-06 | 1.969318  | up        | PREDICTED: basic leucine zipper 45-like [Sesamum indicum]                                                   |
| c43198.graph_c0 | 18.0700348    | 16.1288185    | 19.0650414    | 8.57191939     | 7.53051006     | 8.09231808     | 1.17E-38  | -2.154951 | down      | hypothetical protein MIMGU_mgv1a005420mg [Erythranthe guttata]                                              |
| c43199.graph_c1 | 3.12593216    | 4.14499163    | 3.3387608     | 14.9600654     | 16.720036      | 16.4728281     | 1.014E-06 | 1.163279  | up        | PREDICTED: single-stranded DNA-binding protein, mitochondrial [Sesamum indicum]                             |
| c43200.graph_c0 | 3.30326925    | 3.26472157    | 2.79406648    | 21.9571727     | 22.4855966     | 23.6162126     | 6.391E-17 | 1.845372  | up        | PREDICTED: uncharacterized aarF domain-containing protein kinase At1g79600, chloroplastic [Sesamum indicum] |
| c43201.graph_c0 | 1.6494096     | 1.81616735    | 1.37771181    | 13.7138819     | 14.9708824     | 16.3263762     | 4.224E-15 | 2.198723  | up        | PREDICTED: ATP-dependent RNA helicase-like protein DB10 [Sesamum indicum]                                   |
| c43201.graph_c1 | 0.5038334     | 0.60520549    | 0.77693504    | 7.98362403     | 8.26099133     | 7.26898486     | 4.219E-10 | 2.618878  | up        | PREDICTED: ATP-dependent RNA helicase-like protein DB10 [Sesamum indicum]                                   |
| c43202.graph_c0 | 20.1522391    | 25.2777837    | 23.8982442    | 16.846524      | 15.1151888     | 13.4603505     | 5.014E-18 | -1.625311 | down      | PREDICTED: probable phytol kinase 1, chloroplastic [Nicotiana glauca]                                       |
| c43205.graph_c0 | 28.2188275    | 26.440737     | 26.9530797    | 17.3955993     | 27.3365009     | 30.29241       | 1.863E-14 | -1.147246 | down      | PREDICTED: protein TRANSPARENT TESTA 12-like [Sesamum indicum]                                              |
| c43206.graph_c0 | 0.12642643    | 0.21092172    | 0.16246297    | 1.5141396      | 1.68630614     | 1.58909041     | 9.309E-05 | 2.241001  | up        | hypothetical protein MIMGU_mgv1a010976mg [Erythranthe guttata]                                              |
| c43207.graph_c1 | 8.04206005    | 8.29405577    | 7.08530366    | 2.55381513     | 3.22573774     | 2.75930563     | 2.863E-45 | -2.474974 | down      | PREDICTED: BRCT domain-containing protein At4g02110 [Sesamum indicum]                                       |
| c43211.graph_c0 | 2.81169693    | 5.62902484    | 4.30135937    | 1.69604194     | 0.45735474     | 1.48168923     | 2.859E-06 | -2.814997 | down      | -                                                                                                           |
| c43214.graph_c0 | 0.42180977    | 0.14074405    | 0.54204225    | 5.37561494     | 5.21452683     | 6.56968244     | 2.681E-08 | 2.932219  | up        | -                                                                                                           |
| c43218.graph_c0 | 6.65294303    | 6.16169055    | 5.75279676    | 55.9067855     | 60.6221657     | 64.3735592     | 3.152E-35 | 2.266233  | up        | -                                                                                                           |
| c43222.graph_c0 | 40.6669995    | 40.9720572    | 41.3997528    | 12.8938305     | 13.0151363     | 8.92934302     | 8.591E-62 | -2.835421 | down      | --                                                                                                          |
| c43223.graph_c0 | 1.64077962    | 2.02144322    | 1.73002402    | 0.0387588      | 0              | 0.03448735     | 8.773E-23 | -7.199419 | down      | PREDICTED: uncharacterized protein LOC105164927 [Sesamum indicum]                                           |
| c43225.graph_c0 | 0             | 0             | 0             | 22.7429854     | 50.2819518     | 4.04731432     | 0.0011486 | Inf       | up        | hypothetical protein Csa_2G382530 [Cucumis sativus]                                                         |
| c43229.graph_c0 | 2.85503296    | 2.67511969    | 3.30621343    | 2.37027675     | 2.85122362     | 2.29955356     | 6.251E-07 | -1.253859 | down      | unnamed protein product [Vitis vinifera]                                                                    |

| #ID             | 0 h-1<br>FPKM | 0 h-2<br>FPKM | 0 h-3<br>FPKM | 48 h-1<br>FPKM | 48 h-2<br>FPKM | 48 h-3<br>FPKM | FDR       | log2FC    | regulated | nr_annotation                                                                                          |
|-----------------|---------------|---------------|---------------|----------------|----------------|----------------|-----------|-----------|-----------|--------------------------------------------------------------------------------------------------------|
| c43231.graph_c0 | 69.6869052    | 72.5409009    | 71.2906911    | 17.8813356     | 11.448482      | 9.31841907     | 3.57E-121 | -3.47246  | down      | hypothetical protein MIMGU_mgv1a010924mg<br>[Erythranthe guttata]                                      |
| c43238.graph_c0 | 0.02756648    | 0             | 0             | 3.88559341     | 2.8249221      | 3.45737765     | 1.625E-20 | 7.5354    | up        | PREDICTED: kinesin-like protein KIF22 [Sesamum indicum]                                                |
| c43245.graph_c0 | 16.4294765    | 16.9589967    | 16.1993257    | 5.53877145     | 6.53013411     | 7.12001195     | 1.014E-57 | -2.390577 | down      | PREDICTED: uncharacterized protein LOC105163648<br>[Sesamum indicum]                                   |
| c43246.graph_c0 | 20.8235224    | 19.9166689    | 19.5017282    | 86.6080974     | 100.060922     | 102.395037     | 6.254E-19 | 1.24278   | up        | unnamed protein product [Coffea canephora]                                                             |
| c43247.graph_c0 | 0             | 0             | 0             | 3.72990497     | 6.28168427     | 7.829075       | 9.42E-11  | Inf       | up        | -                                                                                                      |
| c43248.graph_c0 | 23.7665796    | 26.5266518    | 26.1501178    | 3.00798372     | 2.92722008     | 2.9877051      | 4.49E-111 | -4.116452 | down      | PREDICTED: cell cycle checkpoint protein RAD17<br>[Sesamum indicum]                                    |
| c43250.graph_c0 | 0.64251763    | 0.71462335    | 0.45870033    | 7.76084887     | 10.1029098     | 12.113985      | 5.773E-11 | 3.025433  | up        | PREDICTED: uncharacterized protein LOC105177156<br>[Sesamum indicum]                                   |
| c43250.graph_c1 | 0.83391374    | 0.34781199    | 0.44650507    | 5.82593929     | 6.71445877     | 7.0637564      | 2.772E-07 | 2.573645  | up        | PREDICTED: uncharacterized protein LOC102585981<br>isoform X1 [Solanum tuberosum]                      |
| c43253.graph_c0 | 3.56511768    | 5.35303141    | 5.0394491     | 1.31376758     | 3.0155178      | 3.60436268     | 9.481E-05 | -1.848664 | down      | PREDICTED: ethylene-responsive transcription factor<br>CRF4-like [Sesamum indicum]                     |
| c43253.graph_c1 | 1.38182222    | 1.38320591    | 2.13083552    | 0.7213807      | 0.76421538     | 0.75515319     | 1.378E-05 | -2.151021 | down      | PREDICTED: ethylene-responsive transcription factor<br>CRF4-like [Sesamum indicum]                     |
| c43254.graph_c0 | 0.43801723    | 0.526147      | 0.50658253    | 5.26606703     | 5.17264289     | 4.54209134     | 3.099E-11 | 2.331592  | up        | PREDICTED: LOW QUALITY PROTEIN: linoleate 13S-<br>lipoxygenase 3-1, chloroplastic [Sesamum indicum]    |
| c43254.graph_c1 | 0.17018039    | 0.5110524     | 0.65606562    | 4.70343828     | 2.98963352     | 3.62707895     | 0.0001738 | 2.062648  | up        | PREDICTED: LOW QUALITY PROTEIN: linoleate 13S-<br>lipoxygenase 3-1, chloroplastic [Sesamum indicum]    |
| c43257.graph_c0 | 4.51445744    | 3.49193754    | 4.74648263    | 27.1596129     | 29.5066449     | 28.8763968     | 1.77E-12  | 1.725451  | up        | PREDICTED: transcriptional regulator ATRX homolog<br>[Solanum tuberosum]                               |
| c43258.graph_c0 | 4.87535993    | 5.64525276    | 6.29889557    | 0.92257829     | 1.95471966     | 1.27456243     | 3.726E-29 | -3.048657 | down      | PREDICTED: zinc finger BED domain-containing protein<br>DAYSLEEPER-like isoform X1 [Sesamum indicum]   |
| c43259.graph_c0 | 0.03502619    | 0             | 0.09002008    | 15.4243009     | 18.8014583     | 20.6440997     | 6.302E-71 | 7.738044  | up        | PREDICTED: 1-acyl-sn-glycerol-3-phosphate<br>acyltransferase-like [Sesamum indicum]                    |
| c43260.graph_c0 | 1.47107704    | 1.3743801     | 1.44930072    | 23.9879626     | 28.2359307     | 23.9973143     | 2.992E-33 | 3.130083  | up        | PREDICTED: UPF0057 membrane protein At2g24040-like<br>[Sesamum indicum]                                |
| c43263.graph_c0 | 0.64995008    | 1.1325275     | 0.86614534    | 13.3504961     | 15.3884        | 16.7926772     | 1.742E-39 | 3.082257  | up        | PREDICTED: oxysterol-binding protein-related protein 2A-<br>like isoform X3 [Sesamum indicum]          |
| c43264.graph_c0 | 1.89001568    | 2.01266834    | 1.96366615    | 91.5059176     | 65.1495725     | 59.4673009     | 4.391E-15 | 4.193353  | up        | PREDICTED: chlorophyll a-b binding protein CP26,<br>chloroplastic [Sesamum indicum]                    |
| c43269.graph_c0 | 66.6720576    | 61.9267217    | 58.9636536    | 12.095161      | 10.6130831     | 10.3001878     | 8.66E-122 | -3.519993 | down      | PREDICTED: AP2-like ethylene-responsive transcription<br>factor At2g41710 isoform X1 [Sesamum indicum] |
| c43272.graph_c0 | 0.08719686    | 0.61098923    | 0             | 4.73955471     | 3.8295637      | 4.07427043     | 4.87E-07  | 3.17784   | up        | PREDICTED: histone-lysine N-methyltransferase CLF<br>isoform X3 [Sesamum indicum]                      |



| #ID             | 0 h-1<br>FPKM | 0 h-2<br>FPKM | 0 h-3<br>FPKM | 48 h-1<br>FPKM | 48 h-2<br>FPKM | 48 h-3<br>FPKM | FDR       | log2FC    | regulated | nr_annotation                                                                                   |
|-----------------|---------------|---------------|---------------|----------------|----------------|----------------|-----------|-----------|-----------|-------------------------------------------------------------------------------------------------|
| c43272.graph_c1 | 0.23600488    | 0.33073769    | 0.24262049    | 6.06610422     | 5.09036815     | 6.8098539      | 8.324E-20 | 3.456979  | up        | PREDICTED: histone-lysine N-methyltransferase CLF isoform X2 [Sesamum indicum]                  |
| c43274.graph_c0 | 0.08596319    | 0.05736618    | 0.14728813    | 2.56063496     | 2.65675065     | 4.04011613     | 1.811E-12 | 3.963882  | up        | PREDICTED: uncharacterized protein LOC105179654 [Sesamum indicum]                               |
| c43275.graph_c0 | 40.6047863    | 41.362044     | 38.6741006    | 36.1151252     | 38.6788026     | 37.3695791     | 1.491E-15 | -1.122991 | down      | PREDICTED: ABC transporter A family member 2 [Sesamum indicum]                                  |
| c43278.graph_c1 | 9.20153643    | 8.7773033     | 8.06837223    | 38.5456702     | 37.1366467     | 42.7723003     | 1.405E-10 | 1.168542  | up        | hypothetical protein MIMGU_mgv1a009792mg [Erythranthe guttata]                                  |
| c43279.graph_c0 | 1.63864136    | 1.52517469    | 1.6993522     | 6.8330318      | 6.03230721     | 6.85766383     | 0.0007736 | 1.003204  | up        | PREDICTED: magnesium transporter MRS2-I-like [Sesamum indicum]                                  |
| c43280.graph_c1 | 2.98386457    | 3.19645614    | 4.50708308    | 3.61701403     | 3.52524476     | 2.91801359     | 0.0046279 | -1.107157 | down      | hypothetical protein MIMGU_mgv1a000521mg [Erythranthe guttata]                                  |
| c43281.graph_c0 | 0.0623444     | 0.16641822    | 0.16023006    | 6.50938298     | 7.30154326     | 8.53469684     | 5.747E-38 | 4.818211  | up        | PREDICTED: probable beta-D-xylosidase [Sesamum indicum]                                         |
| c43283.graph_c0 | 13.2937308    | 6.34000454    | 6.70797269    | 0              | 0              | 0              | 1.128E-14 | -Inf      | down      | glycerol-3-phosphate acyltransferase [Cymbidium faberii]                                        |
| c43284.graph_c0 | 0.04775748    | 0             | 0             | 1.97987888     | 1.3982944      | 1.01786205     | 1.393E-06 | 5.537909  | up        | -                                                                                               |
| c43285.graph_c0 | 17.4310852    | 17.0272917    | 16.7356863    | 6.36632734     | 7.26314815     | 7.77083355     | 1.001E-46 | -2.2784   | down      | PREDICTED: pentatricopeptide repeat-containing protein At2g15980 [Sesamum indicum]              |
| c43287.graph_c0 | 35.2367142    | 39.1911094    | 38.5723399    | 258.195989     | 276.287028     | 277.436839     | 2.014E-36 | 1.825708  | up        | PREDICTED: 60S ribosomal protein L51 [Eucalyptus grandis]                                       |
| c43288.graph_c0 | 10.2166752    | 5.68019914    | 6.86688603    | 0              | 0              | 0              | 1.854E-35 | -Inf      | down      | alpha-2 macroglobulin family-like protein [Micromonas sp. RCC299]                               |
| c43296.graph_c0 | 0.58775737    | 0.05883459    | 0.1510583     | 5.08991596     | 4.30224637     | 5.87803348     | 4.068E-09 | 3.252274  | up        | hypothetical protein VITISV_034944 [Vitis vinifera]                                             |
| c43299.graph_c1 | 63.0447828    | 61.1304937    | 63.4629916    | 44.6136695     | 51.22888       | 51.9576955     | 6.766E-21 | -1.364634 | down      | unnamed protein product [Coffea canephora]                                                      |
| c43303.graph_c1 | 5.45970807    | 6.23672928    | 4.95242896    | 26.8849836     | 27.4365753     | 28.0992493     | 4.539E-16 | 1.291138  | up        | PREDICTED: protein MEI2-like 4 [Sesamum indicum]                                                |
| c43304.graph_c0 | 0             | 0             | 0             | 4.7068035      | 7.65337163     | 4.48027746     | 2.981E-11 | Inf       | up        | metallothionein-like type 1 protein [Ipomoea batatas]                                           |
| c43305.graph_c2 | 2.61758962    | 2.27084931    | 2.82551329    | 28.2305598     | 34.6756018     | 32.0429479     | 6.032E-42 | 2.599482  | up        | PREDICTED: probable methyltransferase PMT26 [Sesamum indicum]                                   |
| c43305.graph_c3 | 1.65111495    | 1.71179574    | 1.81864122    | 26.6195088     | 31.1928099     | 24.6526495     | 2.841E-28 | 2.972605  | up        | PREDICTED: probable methyltransferase PMT26 [Sesamum indicum]                                   |
| c43307.graph_c1 | 2.98925096    | 2.80124993    | 2.69708707    | 10.3124502     | 19.4287469     | 14.8587927     | 0.0004515 | 1.36753   | up        | PREDICTED: uncharacterized protein LOC105160017 [Sesamum indicum]                               |
| c43310.graph_c0 | 5.76220946    | 6.10585271    | 5.05004506    | 5.41958017     | 5.29431273     | 5.632616       | 2.919E-07 | -1.065417 | down      | PREDICTED: mitochondrial aspartate-glutamate transporter AGC1 [Sesamum indicum]                 |
| c43312.graph_c0 | 7.62454427    | 7.78636453    | 6.87828249    | 54.2958595     | 58.2903188     | 58.3344102     | 1.575E-40 | 1.921312  | up        | PREDICTED: IAA-amino acid hydrolase ILR1-like 4 [Sesamum indicum]                               |
| c43314.graph_c0 | 0.44278704    | 0.32659084    | 0.44920964    | 8.22289511     | 9.32526297     | 9.60911581     | 4.868E-29 | 3.456752  | up        | PREDICTED: LOW QUALITY PROTEIN: probable serine/threonine-protein kinase WNK3 [Sesamum indicum] |

| #ID             | 0 h-1<br>FPKM | 0 h-2<br>FPKM | 0 h-3<br>FPKM | 48 h-1<br>FPKM | 48 h-2<br>FPKM | 48 h-3<br>FPKM | FDR       | log2FC    | regulated | nr_annotation                                                                               |
|-----------------|---------------|---------------|---------------|----------------|----------------|----------------|-----------|-----------|-----------|---------------------------------------------------------------------------------------------|
| c43319.graph_c0 | 3.70325272    | 1.9247682     | 2.47092907    | 0              | 0              | 0              | 2.008E-16 | -Inf      | down      | predicted protein [Hordeum vulgare subsp. vulgare]                                          |
| c43320.graph_c0 | 0             | 0             | 0             | 2.52546746     | 5.6481227      | 1.37325574     | 0.0005184 | Inf       | up        | hypothetical protein GUTHDRAFT_114321 [Guillardia theta CCMP2712]                           |
| c43322.graph_c0 | 2.64912464    | 3.5085054     | 2.35677465    | 16.0325126     | 21.3599019     | 22.4174237     | 1.585E-14 | 1.791687  | up        | hypothetical protein MIMGU_mgv1a008032mg [Erythranthe guttata]                              |
| c43323.graph_c0 | 22.9477132    | 24.0933197    | 20.7307919    | 24.0418473     | 20.7123234     | 20.1193615     | 1.107E-11 | -1.076002 | down      | Ribosome production factor 1 [Gossypium arboreum]                                           |
| c43324.graph_c0 | 24.7604159    | 25.8297971    | 24.6864684    | 14.4206903     | 13.1474554     | 11.5482992     | 3.424E-31 | -1.9588   | down      | hypothetical protein MIMGU_mgv1a008176mg [Erythranthe guttata]                              |
| c43328.graph_c0 | 0.87506275    | 0.82032382    | 0.66041493    | 0.21753656     | 0.21689751     | 0.39851148     | 9.038E-09 | -2.519658 | down      | PREDICTED: leucine-rich repeat receptor protein kinase EXS-like [Nicotiana tomentosiformis] |
| c43332.graph_c0 | 0.30488267    | 0.30518797    | 0.06529772    | 2.48108727     | 2.18207715     | 1.95773315     | 9.97E-05  | 2.290968  | up        | hypothetical protein MIMGU_mgv1a020708mg [Erythranthe guttata]                              |
| c43336.graph_c0 | 20.0470329    | 20.8037649    | 18.3183192    | 12.6304868     | 12.4095207     | 11.4954757     | 1.481E-33 | -1.710918 | down      | PREDICTED: uncharacterized protein LOC105160884 [Sesamum indicum]                           |
| c43338.graph_c1 | 34.1207419    | 32.3690311    | 34.6759935    | 23.8325055     | 31.6683883     | 34.0941616     | 6.929E-10 | -1.198758 | down      | PREDICTED: calcium-dependent protein kinase 26-like [Sesamum indicum]                       |
| c43339.graph_c0 | 68.7471161    | 67.0296694    | 70.3734715    | 62.418001      | 60.1285764     | 65.0834566     | 4.949E-16 | -1.15348  | down      | unnamed protein product [Coffea canephora]                                                  |
| c43342.graph_c0 | 1.80407069    | 1.54603875    | 1.70120022    | 10.8211149     | 12.4643542     | 12.8522697     | 1.202E-24 | 1.818536  | up        | PREDICTED: tRNA(adenine(34)) deaminase, chloroplastic [Sesamum indicum]                     |
| c43349.graph_c0 | 0.84691833    | 0.93700496    | 1.37472453    | 9.56816228     | 8.96171414     | 8.40407489     | 5.052E-09 | 2.071286  | up        | Transcription factor SPEECHLESS [Glycine soja]                                              |
| c43349.graph_c1 | 19.9871317    | 19.500208     | 17.6579257    | 9.36224369     | 11.4338944     | 12.8416519     | 2.196E-27 | -1.785293 | down      | PREDICTED: protein DEFECTIVE IN MERISTEM SILENCING 3-like [Sesamum indicum]                 |
| c43350.graph_c0 | 3.31847026    | 3.0993517     | 2.96982609    | 2.78422775     | 2.94955169     | 3.50963457     | 2.611E-06 | -1.041259 | down      | PREDICTED: pentatricopeptide repeat-containing protein At2g32630 [Sesamum indicum]          |
| c43353.graph_c0 | 49.9218738    | 52.2618993    | 52.3922104    | 198.944304     | 211.235817     | 225.510583     | 3.105E-13 | 1.020598  | up        | PREDICTED: uncharacterized protein LOC105157922 [Sesamum indicum]                           |
| c43359.graph_c0 | 0             | 0             | 0             | 19.0110614     | 19.2381272     | 9.72034677     | 5.463E-12 | Inf       | up        | -                                                                                           |
| c43360.graph_c0 | 3.59412775    | 3.66968126    | 4.71096839    | 26.389825      | 28.7636036     | 26.5161315     | 6.205E-21 | 1.748352  | up        | PREDICTED: palmitoyl-protein thioesterase 1-like [Sesamum indicum]                          |
| c43361.graph_c0 | 20.3230543    | 22.0975153    | 20.5686972    | 7.32379329     | 8.73893312     | 8.65385379     | 2.63E-54  | -2.370097 | down      | hypothetical protein MIMGU_mgv1a001131mg [Erythranthe guttata]                              |
| c43362.graph_c0 | 59.988471     | 58.8307072    | 59.168611     | 19.6144368     | 15.6642577     | 14.3458245     | 3.496E-80 | -2.854749 | down      | PREDICTED: protein SRG1-like [Citrus sinensis]                                              |
| c43363.graph_c0 | 7.46029793    | 8.54862949    | 8.45150184    | 4.97381866     | 4.02372047     | 4.10380674     | 2.462E-07 | -1.914886 | down      | -                                                                                           |
| c43363.graph_c2 | 12.8422355    | 12.2228772    | 12.038914     | 6.59438636     | 5.80450485     | 4.78903406     | 9.526E-20 | -2.123033 | down      | hypothetical protein MIMGU_mgv1a021390mg, partial [Erythranthe guttata]                     |
| c43369.graph_c0 | 2.37230986    | 2.10388792    | 2.13930673    | 12.2504516     | 13.5262287     | 12.998573      | 2.07E-14  | 1.532883  | up        | PREDICTED: B2 protein [Sesamum indicum]                                                     |

| #ID             | 0 h-1<br>FPKM | 0 h-2<br>FPKM | 0 h-3<br>FPKM | 48 h-1<br>FPKM | 48 h-2<br>FPKM | 48 h-3<br>FPKM | FDR       | log2FC    | regulated | nr_annotation                                                                         |
|-----------------|---------------|---------------|---------------|----------------|----------------|----------------|-----------|-----------|-----------|---------------------------------------------------------------------------------------|
| c43372.graph_c0 | 13.468978     | 13.423071     | 11.8946014    | 6.38190528     | 6.18176659     | 6.71215563     | 2.139E-40 | -2.024899 | down      | PREDICTED: nuclear pore complex protein NUP214 [Sesamum indicum]                      |
| c43374.graph_c0 | 17.6483677    | 17.7113374    | 20.469117     | 12.6318582     | 9.8929061      | 6.04646697     | 1.318E-19 | -1.976815 | down      | UPA25 [Capsicum annuum]                                                               |
| c43375.graph_c0 | 16.5546918    | 17.9359616    | 16.3680307    | 132.847463     | 103.746066     | 81.9018449     | 3.435E-05 | 1.636629  | up        | hypothetical protein MIMGU_mgv1a007068mg [Erythranthe guttata]                        |
| c43376.graph_c0 | 1.45034717    | 1.01625963    | 2.23650424    | 5.56731003     | 8.63451083     | 7.64860388     | 0.0007566 | 1.184879  | up        | PREDICTED: transmembrane protein 64-like [Tarenaya hassleriana]                       |
| c43379.graph_c0 | 0             | 0             | 0             | 23.060192      | 33.487598      | 7.60810185     | 1.443E-06 | Inf       | up        | unknown [Medicago truncatula]                                                         |
| c43386.graph_c0 | 18.1090614    | 17.5927321    | 15.8379077    | 12.1742624     | 12.7234558     | 11.0149523     | 6.645E-18 | -1.537058 | down      | PREDICTED: vacuolar protein sorting-associated protein VTA1 homolog [Sesamum indicum] |
| c43387.graph_c0 | 11.575851     | 11.5874424    | 14.8754268    | 0.15020322     | 0              | 0              | 5.308E-35 | -8.947594 | down      | PREDICTED: uncharacterized protein LOC104587006 isoform X2 [Nelumbo nucifera]         |
| c43389.graph_c0 | 0.02750534    | 0.01376644    | 0.03534545    | 2.30591368     | 4.57696184     | 4.90399909     | 7.752E-14 | 6.230538  | up        | PREDICTED: ABC transporter C family member 8-like isoform X3 [Sesamum indicum]        |
| c43390.graph_c0 | 19.6959177    | 18.6887839    | 17.0616747    | 5.94038109     | 6.00706284     | 5.45389722     | 2.165E-57 | -2.687444 | down      | hypothetical protein MIMGU_mgv1a008049mg [Erythranthe guttata]                        |
| c43392.graph_c0 | 0.8192594     | 0.72895979    | 0.70185384    | 3.85763766     | 3.48702063     | 4.0294598      | 0.0002711 | 1.322328  | up        | PREDICTED: probable receptor-like protein kinase At5g18500 [Sesamum indicum]          |
| c43393.graph_c0 | 2.1698033     | 1.3637989     | 1.49140726    | 0.55785051     | 0.73871871     | 0.99274406     | 8.725E-06 | -2.156264 | down      | hypothetical protein MIMGU_mgv1a0000292mg, partial [Erythranthe guttata]              |
| c43400.graph_c1 | 21.7139436    | 20.1424951    | 20.0143925    | 12.5681473     | 11.2802794     | 12.3945603     | 5.74E-27  | -1.787014 | down      | PREDICTED: putative G3BP-like protein isoform X2 [Sesamum indicum]                    |
| c43401.graph_c0 | 1.65204358    | 1.55034173    | 1.09464166    | 0.4993965      | 0.83136435     | 0.90988001     | 2.681E-06 | -1.962328 | down      | PREDICTED: ABC transporter B family member 29, chloroplastic [Sesamum indicum]        |
| c43403.graph_c0 | 0.4404849     | 0.94064209    | 0.67924864    | 2.81357037     | 2.78001687     | 3.89967958     | 0.0043864 | 1.183068  | up        | -                                                                                     |
| c43405.graph_c1 | 35.5250553    | 36.8875174    | 34.3518869    | 28.5759386     | 33.334515      | 30.9684147     | 2.715E-16 | -1.220305 | down      | hypothetical protein CISEN_1g022174mg [Citrus sinensis]                               |
| c43406.graph_c0 | 19.2957298    | 20.0925319    | 15.7346523    | 12.6413677     | 15.2945217     | 16.666331      | 2.17E-17  | -1.324846 | down      | PREDICTED: uncharacterized protein LOC105165773 [Sesamum indicum]                     |
| c43406.graph_c1 | 17.927768     | 17.6133918    | 9.81243534    | 4.28198535     | 6.8043664      | 3.26578699     | 4.71E-08  | -2.676063 | down      | -                                                                                     |
| c43407.graph_c0 | 213.601327    | 203.116589    | 209.315054    | 27.029371      | 26.7935621     | 30.3208995     | 5.38E-144 | -3.913507 | down      | PREDICTED: uncharacterized protein LOC105176746 isoform X1 [Sesamum indicum]          |
| c43408.graph_c0 | 14.5380062    | 12.990172     | 13.753556     | 64.6660978     | 83.5214751     | 93.1087161     | 9.19E-13  | 1.524519  | up        | PREDICTED: porphobilinogen deaminase, chloroplastic [Sesamum indicum]                 |
| c43409.graph_c2 | 9.46113231    | 11.5927822    | 10.0435071    | 4.51843776     | 7.9676008      | 10.3235519     | 4.403E-10 | -1.475635 | down      | PREDICTED: uncharacterized membrane protein At4g09580 isoform X3 [Sesamum indicum]    |
| c43412.graph_c0 | 0.23895416    | 0.31892458    | 0.25588796    | 54.4479983     | 72.6066073     | 79.5596773     | 2.392E-66 | 6.965246  | up        | PREDICTED: uncharacterized protein LOC105177232 [Sesamum indicum]                     |

| #ID             | 0 h-1<br>FPKM | 0 h-2<br>FPKM | 0 h-3<br>FPKM | 48 h-1<br>FPKM | 48 h-2<br>FPKM | 48 h-3<br>FPKM | FDR       | log2FC    | regulated | nr_annotation                                                                                    |
|-----------------|---------------|---------------|---------------|----------------|----------------|----------------|-----------|-----------|-----------|--------------------------------------------------------------------------------------------------|
| c43415.graph_c0 | 253.243437    | 257.284246    | 266.521775    | 136.214191     | 142.777249     | 147.811847     | 3.897E-33 | -1.883519 | down      | hypothetical protein MIMGU_mgv1a002107mg [Erythranthe guttata]                                   |
| c43418.graph_c0 | 24.5804177    | 24.3306257    | 22.4278093    | 22.5328408     | 18.2524021     | 15.8049665     | 1.664E-19 | -1.3452   | down      | PREDICTED: UBX domain-containing protein 4 [Sesamum indicum]                                     |
| c43421.graph_c0 | 1.19591357    | 0.88928253    | 1.09771163    | 6.64200018     | 7.0363938      | 8.06674599     | 2.307E-07 | 1.752591  | up        | PREDICTED: GDT1-like protein 2, chloroplastic [Sesamum indicum]                                  |
| c43426.graph_c0 | 133.800454    | 122.405109    | 138.516376    | 31.9193301     | 32.1040718     | 30.223232      | 1.96E-94  | -3.084115 | down      | PREDICTED: r-box protein SKR25-like [Sesamum indicum]                                            |
| c43433.graph_c0 | 73.5132952    | 69.2945357    | 66.3677534    | 39.3081411     | 30.6593944     | 31.8300421     | 4.49E-47  | -2.050869 | down      | PREDICTED: probable 1-acylglycerol-3-phosphate O-acyltransferase [Beta vulgaris subsp. vulgaris] |
| c43435.graph_c0 | 0             | 0             | 0             | 1.41257207     | 1.78608408     | 1.45962363     | 1.742E-11 | Inf       | up        | predicted protein [Hordeum vulgare subsp. vulgare]                                               |
| c43443.graph_c0 | 0.21466815    | 0.10744156    | 0.13792854    | 2.04358514     | 1.85066653     | 2.87419738     | 4.036E-07 | 2.862482  | up        | PREDICTED: CDT1-like protein a, chloroplastic [Sesamum indicum]                                  |
| c43444.graph_c0 | 82.7826441    | 75.1905826    | 76.1535934    | 12.4348735     | 12.9393961     | 11.2936216     | 1.14E-131 | -3.69132  | down      | PREDICTED: probable polygalacturonase At1g80170 [Sesamum indicum]                                |
| c43453.graph_c0 | 8.57484837    | 10.4126914    | 8.87714932    | 3.84810211     | 3.62581996     | 2.86432285     | 7.596E-42 | -2.444485 | down      | PREDICTED: uncharacterized protein LOC105177800 [Sesamum indicum]                                |
| c43454.graph_c0 | 2.54483334    | 2.21511444    | 2.65408478    | 20.7943982     | 21.1652555     | 22.5842151     | 3.147E-22 | 2.102688  | up        | hypothetical protein MIMGU_mgv1a003626mg [Erythranthe guttata]                                   |
| c43456.graph_c1 | 2.94332776    | 2.59272205    | 4.91698052    | 1.35579276     | 1.14903842     | 1.59241664     | 0.0003445 | -2.374758 | down      | PREDICTED: putative Myb family transcription factor At1g14600 [Sesamum indicum]                  |
| c43457.graph_c0 | 0             | 0             | 0             | 6.0293695      | 10.0373207     | 5.48280654     | 5.286E-13 | Inf       | up        | ADP ribosylation factor [Karlodinium veneficum]                                                  |
| c43463.graph_c0 | 1.62124122    | 2.20245917    | 1.87502324    | 17.2830066     | 14.6021918     | 14.7138202     | 2.696E-20 | 2.017192  | up        | F3H9.11 protein isoform 5 [Theobroma cacao]                                                      |
| c43466.graph_c0 | 32.9210148    | 31.8206423    | 27.6436176    | 24.1107416     | 24.479911      | 27.093639      | 8.576E-18 | -1.304435 | down      | PREDICTED: 50S ribosomal protein L3-2, chloroplastic-like [Sesamum indicum]                      |
| c43467.graph_c0 | 0.07717569    | 0.38626486    | 0.29752146    | 14.5753529     | 16.495314      | 16.3853019     | 9.643E-24 | 4.938146  | up        | hypothetical protein VITISV_020777 [Vitis vinifera]                                              |
| c43471.graph_c0 | 0.01644231    | 0             | 0             | 16.7988318     | 17.9728444     | 20.8240638     | 1.56E-149 | 10.72481  | up        | PREDICTED: pentatricopeptide repeat-containing protein MRL1, chloroplastic [Sesamum indicum]     |
| c43477.graph_c0 | 25.4891655    | 22.8653083    | 26.026218     | 9.64734829     | 10.9502097     | 11.5084242     | 9.959E-34 | -2.232917 | down      | PREDICTED: high mobility group B protein 14-like isoform X2 [Nelumbo nucifera]                   |
| c43479.graph_c0 | 0.38280194    | 0.07663705    | 0.29514939    | 2.68023207     | 2.91410144     | 3.07520696     | 1.807E-05 | 2.50186   | up        | PREDICTED: acylglycerol kinase 4-like [Sesamum indicum]                                          |
| c43481.graph_c0 | 2.48324815    | 1.42041986    | 1.08268521    | 0.3268186      | 0.2596685      | 0              | 1.413E-06 | -4.081608 | down      | -                                                                                                |
| c43482.graph_c0 | 19.4626231    | 20.0520674    | 19.4893635    | 15.3074637     | 18.3886922     | 18.9244179     | 2.387E-11 | -1.18615  | down      | PREDICTED: ribosome biogenesis protein TSR3 homolog isoform X2 [Sesamum indicum]                 |
| c43483.graph_c0 | 0.52873211    | 0.45365276    | 0.42707764    | 0.12525493     | 0.26538482     | 0.21051872     | 4.229E-06 | -2.256485 | down      | hypothetical protein MIMGU_mgv1a000607mg [Erythranthe guttata]                                   |
| c43484.graph_c0 | 16.7331936    | 17.6941404    | 15.2240909    | 13.3996752     | 11.0469503     | 8.27338323     | 7.528E-28 | -1.611707 | down      | PREDICTED: histone-lysine N-methyltransferase ASHR2 [Sesamum indicum]                            |

| #ID             | 0 h-1<br>FPKM | 0 h-2<br>FPKM | 0 h-3<br>FPKM | 48 h-1<br>FPKM | 48 h-2<br>FPKM | 48 h-3<br>FPKM | FDR       | log2FC    | regulated | nr_annotation                                                                              |
|-----------------|---------------|---------------|---------------|----------------|----------------|----------------|-----------|-----------|-----------|--------------------------------------------------------------------------------------------|
| c43488.graph_c1 | 56.2874843    | 53.5079984    | 55.470229     | 37.1575294     | 35.5075446     | 31.3819177     | 3.57E-32  | -1.683155 | down      | hypothetical protein CISIN_1g018310mg [Citrus sinensis]                                    |
| c43491.graph_c0 | 1.70550907    | 1.62961611    | 1.89278576    | 22.4613926     | 25.9136066     | 30.916359      | 1.624E-31 | 2.900091  | up        | PREDICTED: cytochrome b561 and DOMON domain-containing protein At4g17280 [Sesamum indicum] |
| c43492.graph_c0 | 0             | 0             | 0.07395272    | 1.32544688     | 1.06715419     | 0.99067472     | 1.554E-08 | 4.470791  | up        | PREDICTED: actin-related protein 2/3 complex subunit 2B [Sesamum indicum]                  |
| c43493.graph_c0 | 89.8759357    | 92.2204127    | 87.608149     | 37.7126404     | 20.8225507     | 14.196013      | 3.47E-89  | -2.892215 | down      | PREDICTED: E3 ubiquitin-protein ligase RNF170-like [Sesamum indicum]                       |
| c43494.graph_c0 | 0.83879053    | 1.02621499    | 1.25752554    | 7.04059784     | 6.50358742     | 6.72307296     | 1.522E-05 | 1.678545  | up        | PREDICTED: uncharacterized protein LOC105160516 isoform X2 [Sesamum indicum]               |
| c43495.graph_c0 | 39.2122608    | 34.8156935    | 40.388011     | 26.896406      | 23.9868588     | 20.6049435     | 3.478E-30 | -1.693243 | down      | PREDICTED: jmjC domain-containing protein 7 [Sesamum indicum]                              |
| c43496.graph_c0 | 0.89059982    | 0.89149162    | 1.14445602    | 6.68104036     | 6.58106778     | 5.57972105     | 0.0001729 | 1.66796   | up        | -                                                                                          |
| c43498.graph_c0 | 2.73053086    | 2.57658109    | 2.45842311    | 2.40338515     | 2.29148563     | 3.15074935     | 0.000137  | -1.003414 | down      | PREDICTED: chromosome transmission fidelity protein 18 homolog [Sesamum indicum]           |
| c43500.graph_c0 | 6.88810466    | 5.97006276    | 4.4257436     | 22.9066866     | 27.7101271     | 26.1663789     | 1.172E-08 | 1.13483   | up        | unnamed protein product [Vitis vinifera]                                                   |
| c43504.graph_c0 | 85.2011869    | 75.5729352    | 75.8802576    | 345.736456     | 373.58714      | 367.096253     | 3.792E-17 | 1.180779  | up        | PREDICTED: 40S ribosomal protein S12-like [Sesamum indicum]                                |
| c43506.graph_c0 | 1.21393017    | 1.65971125    | 1.82628098    | 0.16366122     | 0.34675843     | 0.31552033     | 4.676E-13 | -3.541181 | down      | PREDICTED: uncharacterized protein LOC103328554 [Prunus mume]                              |
| c43510.graph_c1 | 39.609164     | 38.2971621    | 31.6192894    | 38.2874283     | 34.118003      | 34.8058568     | 2.154E-07 | -1.043858 | down      | PREDICTED: dynamin-related protein 3A [Sesamum indicum]                                    |
| c43510.graph_c2 | 33.25454      | 31.5453352    | 29.0803104    | 27.4288459     | 27.4171915     | 29.671031      | 3.93E-13  | -1.168358 | down      | PREDICTED: dynamin-related protein 3A-like [Nicotiana glauca]                              |
| c43511.graph_c0 | 22.2370477    | 23.6881221    | 21.2868068    | 10.1738992     | 13.3808659     | 12.1933981     | 3.743E-32 | -1.932003 | down      | PREDICTED: uncharacterized protein LOC105169670 [Sesamum indicum]                          |
| c43512.graph_c0 | 3.3210317     | 3.14170022    | 3.6579919     | 27.9394164     | 30.9519017     | 33.027435      | 1.664E-30 | 2.1619    | up        | PREDICTED: malonyl-CoA-acyl carrier protein transacylase, mitochondrial [Sesamum indicum]  |
| c43516.graph_c0 | 11.8872059    | 13.5087231    | 12.3401565    | 67.9504806     | 59.929078      | 56.0147497     | 1.769E-12 | 1.270585  | up        | PREDICTED: solute carrier family 25 member 44-like [Nicotiana glauca]                      |
| c43522.graph_c0 | 63.0121231    | 63.8412191    | 60.1075259    | 30.4684493     | 32.9544542     | 32.1093516     | 2.332E-44 | -1.986838 | down      | PREDICTED: TOM1-like protein 2 isoform X2 [Sesamum indicum]                                |
| c43530.graph_c0 | 6.447602      | 6.97384823    | 5.8387215     | 77.2991005     | 70.6973832     | 61.0118992     | 6.125E-24 | 2.426725  | up        | hypothetical protein MIMGU_mgv1a026892mg [Erythranthe guttata]                             |
| c43538.graph_c0 | 21.4193634    | 20.1342287    | 18.5056376    | 19.9103334     | 21.7190964     | 18.7685362     | 1.862E-12 | -1.008563 | down      | PREDICTED: cyclophilin-11-4-like isoform X2 [Sesamum indicum]                              |
| c43539.graph_c0 | 30.3404579    | 29.7981048    | 28.6339145    | 12.4896398     | 15.1391661     | 14.1618468     | 2.892E-49 | -2.106936 | down      | PREDICTED: autophagy-related protein 18 [Sesamum indicum]                                  |
| c43541.graph_c0 | 0.94771995    | 0.94866895    | 0.635404      | 7.0986943      | 6.87676577     | 8.57946191     | 2.451E-08 | 2.140668  | up        | PREDICTED: DNA-3-methyladenine glycosylase isoform X1 [Sesamum indicum]                    |
| c43545.graph_c0 | 14.1602913    | 13.4182404    | 13.6660707    | 10.3684926     | 14.916528      | 16.5143808     | 5.357E-11 | -1.005195 | down      | PREDICTED: probable beta-1,4-xylosyltransferase IRX10L [Sesamum indicum]                   |

| #ID             | 0 h-1<br>FPKM | 0 h-2<br>FPKM | 0 h-3<br>FPKM | 48 h-1<br>FPKM | 48 h-2<br>FPKM | 48 h-3<br>FPKM | FDR       | log2FC    | regulated | nr_annotation                                                                                 |
|-----------------|---------------|---------------|---------------|----------------|----------------|----------------|-----------|-----------|-----------|-----------------------------------------------------------------------------------------------|
| c43547.graph_c0 | 2.7057567     | 2.22613652    | 2.02428343    | 19.5319943     | 21.7589256     | 19.3847724     | 2.484E-33 | 2.108524  | up        | PREDICTED: protein LHY-like [Sesamum indicum]                                                 |
| c43548.graph_c0 | 29.7826751    | 31.9806796    | 28.1588526    | 13.3364059     | 14.9034239     | 13.9677322     | 1.301E-42 | -2.109358 | down      | unnamed protein product [Coffea canephora]                                                    |
| c43550.graph_c0 | 2.08605274    | 1.87932745    | 1.80944574    | 0.57654235     | 0.30538836     | 0.76950588     | 1.586E-08 | -2.819304 | down      | PREDICTED: subtilisin-like protease SDD1, partial [Sesamum indicum]                           |
| c43552.graph_c1 | 2.18504381    | 2.08430324    | 1.81685564    | 0.59206026     | 0.60212741     | 0.56895659     | 2.44E-12  | -2.802908 | down      | hypothetical protein MIMGU_mgv1a005717mg [Erythranthe guttata]                                |
| c43556.graph_c0 | 15.5227679    | 14.1914389    | 13.9167707    | 62.4025582     | 74.1152043     | 70.2407337     | 3.078E-17 | 1.225096  | up        | PREDICTED: peroxisomal nicotinamide adenine dinucleotide carrier isoform X1 [Sesamum indicum] |
| c43560.graph_c0 | 11.7519198    | 10.9725245    | 12.0214053    | 8.48703144     | 8.71277877     | 7.40301203     | 3.684E-24 | -1.515241 | down      | PREDICTED: protein HASTY 1 [Sesamum indicum]                                                  |
| c43561.graph_c0 | 10.9970005    | 12.3241878    | 11.9811231    | 0.91767701     | 1.39992122     | 2.38430697     | 7.333E-57 | -3.937221 | down      | PREDICTED: uncharacterized protein LOC105156369 [Sesamum indicum]                             |
| c43566.graph_c1 | 0             | 0             | 0             | 2.94050131     | 4.15347278     | 3.98695678     | 1.044E-11 | Inf       | up        | PREDICTED: protein ECEKIFEKUM 1-like [Sesamum indicum]                                        |
| c43567.graph_c0 | 0.53306695    | 0.50551648    | 0.43263924    | 9.14989463     | 8.10505183     | 8.48650093     | 1.25E-38  | 3.11563   | up        | PREDICTED: uncharacterized protein LOC105158074 [Sesamum indicum]                             |
| c43568.graph_c0 | 89.4368897    | 94.3236194    | 84.0180281    | 41.4555704     | 43.0363774     | 45.9300792     | 3.634E-43 | -2.055613 | down      | PREDICTED: nucleolin [Sesamum indicum]                                                        |
| c43570.graph_c0 | 5.66986986    | 4.89655068    | 5.50022116    | 78.9663331     | 85.9880536     | 76.1874323     | 2.474E-63 | 2.889365  | up        | PREDICTED: ferritin-3, chloroplastic [Sesamum indicum]                                        |
| c43571.graph_c0 | 0             | 0             | 0             | 2.67959855     | 6.24516143     | 5.34081111     | 2.753E-08 | Inf       | up        | -                                                                                             |
| c43573.graph_c0 | 1.22333915    | 1.36062682    | 1.68848659    | 0              | 0              | 0.03714131     | 3.704E-20 | -7.889975 | down      | PREDICTED: phospholipase D delta-like [Vitis vinifera]                                        |
| c43574.graph_c0 | 76.5668623    | 74.5711822    | 80.2836467    | 25.5790097     | 20.7103903     | 16.1907024     | 2.423E-84 | -2.900889 | down      | PREDICTED: uncharacterized Rho GTPase-activating protein At5g61530 [Sesamum indicum]          |
| c43575.graph_c1 | 23.4937614    | 25.1418363    | 23.0400524    | 14.3818587     | 15.688385      | 15.1408764     | 1.983E-17 | -1.683145 | down      | PREDICTED: ELMO domain-containing protein A [Sesamum indicum]                                 |
| c43575.graph_c2 | 23.3680183    | 20.2602832    | 25.2998793    | 15.0866512     | 14.5458503     | 13.0469325     | 9.99E-15  | -1.708856 | down      | PREDICTED: ELMO domain-containing protein A [Sesamum indicum]                                 |
| c43576.graph_c1 | 9.14539795    | 10.440089     | 10.6519926    | 4.98349726     | 9.60928777     | 10.3360333     | 4.716E-09 | -1.308599 | down      | PREDICTED: uncharacterized protein C683.02c [Sesamum indicum]                                 |
| c43581.graph_c0 | 49.7945921    | 44.593777     | 46.234669     | 46.8949614     | 46.8674767     | 47.3590716     | 5.419E-11 | -1.011979 | down      | PREDICTED: enhancer of rudimentary homolog isoform X1 [Sesamum indicum]                       |
| c43584.graph_c0 | 2.92859049    | 3.715535      | 3.06319571    | 16.6272622     | 19.3427899     | 22.9459561     | 3.241E-14 | 1.580477  | up        | PREDICTED: nodulation-signaling pathway 1 protein [Sesamum indicum]                           |
| c43587.graph_c0 | 0             | 0.07643826    | 0             | 0.80901887     | 1.2669544      | 1.50231678     | 9.061E-09 | 4.534103  | up        | PREDICTED: vacuolar cation/proton exchanger 3-like [Sesamum indicum]                          |
| c43592.graph_c0 | 0             | 0             | 0             | 4.88113413     | 6.96720134     | 4.70894728     | 7.68E-19  | Inf       | up        | PREDICTED: suppressor of disruption of TFIIIS-like [Sesamum indicum]                          |
| c43599.graph_c0 | 0.18918691    | 0             | 0.08103755    | 1.62671896     | 1.90795201     | 2.11947267     | 3.075E-07 | 3.370874  | up        | PREDICTED: uncharacterized protein At3g27210-like [Sesamum indicum]                           |

| #ID             | 0 h-1<br>FPKM | 0 h-2<br>FPKM | 0 h-3<br>FPKM | 48 h-1<br>FPKM | 48 h-2<br>FPKM | 48 h-3<br>FPKM | FDR       | log2FC    | regulated | nr_annotation                                                                                  |
|-----------------|---------------|---------------|---------------|----------------|----------------|----------------|-----------|-----------|-----------|------------------------------------------------------------------------------------------------|
| c43600.graph_c0 | 2.97471956    | 3.43580572    | 2.74445404    | 2.90446757     | 3.10174516     | 3.14710519     | 0.0003634 | -1.017634 | down      | PREDICTED: poly(ADP-ribose) glycohydrolase 1-like [Sesamum indicum]                            |
| c43601.graph_c0 | 17.1452169    | 19.1723943    | 17.625826     | 14.8276526     | 16.944246      | 14.7889381     | 7.237E-15 | -1.231168 | down      | hypothetical protein MIMGU_mgv1a008619mg [Erythranthe guttata]                                 |
| c43602.graph_c0 | 6.79684083    | 6.32526542    | 6.96007325    | 2.20137648     | 2.43573996     | 3.39520403     | 1.406E-23 | -2.344467 | down      | PREDICTED: DDT domain-containing protein DDB_G0282237 [Sesamum indicum]                        |
| c43605.graph_c0 | 154.036641    | 143.834088    | 152.571266    | 53.2157253     | 53.7945563     | 43.9280662     | 1.932E-71 | -2.593655 | down      | PREDICTED: probable proteasome inhibitor [Sesamum indicum]                                     |
| c43609.graph_c0 | 4.54861651    | 4.852722      | 4.92223352    | 22.8050453     | 23.4932841     | 24.9722491     | 3.957E-19 | 1.295848  | up        | PREDICTED: 116 kDa U5 small nuclear ribonucleoprotein component-like [Sesamum indicum]         |
| c43611.graph_c0 | 0             | 0             | 0             | 0.74986514     | 0.73481185     | 0.7172674      | 8.089E-12 | Inf       | up        | --                                                                                             |
| c43613.graph_c0 | 10.485471     | 8.67777099    | 10.2913528    | 0              | 0              | 0              | 3.921E-51 | -Inf      | down      | PREDICTED: benzoate carboxyl methyltransferase-like [Sesamum indicum]                          |
| c43614.graph_c0 | 0.05233699    | 0.23575227    | 0.10088265    | 1.73578481     | 2.04317059     | 2.617054       | 2.845E-08 | 3.018525  | up        | PREDICTED: taxadiene 3-oxo reductase [Sesamum indicum]                                         |
| c43618.graph_c0 | 8.06847105    | 7.20810412    | 7.02369031    | 30.7185723     | 35.8730684     | 39.2336925     | 1.076E-14 | 1.226647  | up        | PREDICTED: 50S ribosomal protein L10, chloroplastic [Sesamum indicum]                          |
| c43620.graph_c0 | 0.53285022    | 0.33336487    | 0.42795852    | 2.08630961     | 2.86024854     | 2.51158071     | 0.0054611 | 1.505273  | up        | PREDICTED: uncharacterized protein LOC105161412 [Sesamum indicum]                              |
| c43623.graph_c0 | 17.8156993    | 16.3125549    | 16.5968419    | 14.3482378     | 9.97282605     | 9.6530792      | 2.886E-20 | -1.587538 | down      | PREDICTED: uncharacterized protein LOC105169540 isoform X1 [Sesamum indicum]                   |
| c43628.graph_c0 | 35.8837256    | 37.9151942    | 36.6382622    | 29.4545747     | 26.9084734     | 23.3101513     | 3.631E-24 | -1.485574 | down      | PREDICTED: uncharacterized protein LOC105165517 [Sesamum indicum]                              |
| c43630.graph_c1 | 0.13951178    | 0.46550492    | 0.05975939    | 1.32811594     | 2.40547817     | 2.24913629     | 0.0004871 | 2.15222   | up        | -                                                                                              |
| c43633.graph_c0 | 0             | 0             | 0             | 25.4665333     | 50.8649875     | 18.1817136     | 3.258E-09 | Inf       | up        | hypothetical protein SELMODRAFT_227399 [Selaginella moellendorffii]                            |
| c43638.graph_c0 | 0.41890706    | 0.35169322    | 0.45148762    | 3.34882882     | 2.87506996     | 2.90222732     | 1.618E-08 | 1.884676  | up        | PREDICTED: protein KOS1-like isoform A1 [Sesamum indicum]                                      |
| c43640.graph_c0 | 18.2771894    | 18.2954912    | 17.668696     | 6.90545053     | 7.596284       | 7.22435819     | 6.183E-56 | -2.33846  | down      | PREDICTED: LOW QUALITY PROTEIN: ubiquitin carboxyl-terminal hydrolase 2-like [Sesamum indicum] |
| c43644.graph_c0 | 0.51695295    | 0.46300001    | 0.31467079    | 2.65697801     | 3.43876991     | 3.7358237      | 9.572E-09 | 1.90678   | up        | PREDICTED: kinesin-like protein KIN12B [Sesamum indicum]                                       |
| c43650.graph_c0 | 0.63211513    | 0.80531576    | 0.29537926    | 6.1411         | 7.45917981     | 6.07669386     | 1.655E-07 | 2.493201  | up        | PREDICTED: solute carrier family 35 member F1-like isoform X2 [Sesamum indicum]                |
| c43651.graph_c0 | 28.5596623    | 25.6400961    | 29.6278437    | 161.346871     | 182.686511     | 205.166697     | 1.437E-33 | 1.690379  | up        | PREDICTED: UDP-glucose 4-epimerase GEPI48 [Sesamum indicum]                                    |
| c43652.graph_c0 | 116.078884    | 121.311759    | 105.998491    | 53.3042252     | 49.9824789     | 46.1178631     | 1.17E-48  | -2.214998 | down      | PREDICTED: protein SMG7-like [Sesamum indicum]                                                 |
| c43654.graph_c0 | 3.93957905    | 3.959111      | 3.28163031    | 2.38134361     | 2.99385979     | 3.47194109     | 2.092E-10 | -1.358438 | down      | PREDICTED: uncharacterized protein LOC105159805 [Sesamum indicum]                              |
| c43656.graph_c0 | 0.22641141    | 0.05665953    | 0.14547381    | 3.23306687     | 3.09358661     | 3.4799558      | 1.482E-08 | 3.500315  | up        | -                                                                                              |

| #ID             | 0 h-1<br>FPKM | 0 h-2<br>FPKM | 0 h-3<br>FPKM | 48 h-1<br>FPKM | 48 h-2<br>FPKM | 48 h-3<br>FPKM | FDR       | log2FC    | regulated | nr_annotation                                                                                              |
|-----------------|---------------|---------------|---------------|----------------|----------------|----------------|-----------|-----------|-----------|------------------------------------------------------------------------------------------------------------|
| c43658.graph_c0 | 1.05304781    | 1.51240762    | 1.23553786    | 5.98953735     | 6.56861068     | 7.80652463     | 0.0002324 | 1.400966  | up        | PREDICTED: potassium transporter 8-like [Sesamum indicum]                                                  |
| c43663.graph_c0 | 43.7727795    | 43.181588     | 39.4020021    | 35.0385518     | 35.2616679     | 32.9352925     | 1.339E-20 | -1.307494 | down      | PREDICTED: VIN3-like protein 2 isoform X2 [Sesamum indicum]                                                |
| c43666.graph_c0 | 3.08869046    | 2.41309917    | 2.75900126    | 20.751352      | 21.7997323     | 21.6447561     | 3.467E-19 | 1.940176  | up        | PREDICTED: uncharacterized protein LOC105173066 [Sesamum indicum]                                          |
| c43670.graph_c0 | 1.26944227    | 1.31378845    | 1.02300834    | 8.44413601     | 12.8723355     | 13.6160892     | 6.771E-11 | 2.253082  | up        | PREDICTED: ABC transporter B family member 15-like [Sesamum indicum]                                       |
| c43672.graph_c0 | 1.68327315    | 1.58179796    | 2.14100047    | 14.969398      | 16.1935318     | 16.0089604     | 3.055E-31 | 2.103448  | up        | unnamed protein product [Coffea canephora]                                                                 |
| c43680.graph_c1 | 98.750186     | 95.0656514    | 101.959183    | 74.3818304     | 74.8685349     | 72.8935217     | 5.813E-21 | -1.430841 | down      | PREDICTED: probable receptor protein kinase TMK1 [Sesamum indicum]                                         |
| c43682.graph_c0 | 24.6962476    | 24.2806544    | 20.7937186    | 21.9991902     | 21.4349035     | 20.5534845     | 1.563E-14 | -1.139642 | down      | -                                                                                                          |
| c43684.graph_c0 | 1.42779806    | 1.60246751    | 1.64944602    | 12.0908731     | 14.3289809     | 15.4637023     | 9.899E-33 | 2.139614  | up        | PREDICTED: villin-4-like [Sesamum indicum]                                                                 |
| c43685.graph_c1 | 0.34445747    | 0.30423741    | 0.15622641    | 45.9391528     | 51.4750516     | 52.0712951     | 6.19E-203 | 6.524383  | up        | PREDICTED: LOW QUALITY PROTEIN: LRR receptor-like serine/threonine-protein kinase ERECTA [Sesamum indicum] |
| c43688.graph_c0 | 10.8972209    | 9.32603718    | 11.0102756    | 9.50278319     | 10.6353475     | 11.0467269     | 0.0004007 | -1.022792 | down      | hypothetical protein MIMGU_mgv1a020146mg, partial [Erythranthe guttata]                                    |
| c43691.graph_c0 | 0.07687391    | 0             | 0.04939301    | 1.02690821     | 2.43836232     | 2.36311228     | 2.025E-06 | 4.497318  | up        | PREDICTED: dirigent protein 21-like [Sesamum indicum]                                                      |
| c43694.graph_c0 | 0.17641527    | 0.13244394    | 0             | 12.4738129     | 11.0407728     | 11.4787354     | 2.352E-61 | 5.825841  | up        | PREDICTED: probable LRR receptor-like serine/threonine-protein kinase At1g67720 [Sesamum indicum]          |
| c43695.graph_c0 | 0             | 0             | 0             | 1.13557931     | 1.70953851     | 1.22315409     | 2.211E-10 | Inf       | up        | PREDICTED: nudix hydrolase 3-like [Cicer arietinum]                                                        |
| c43696.graph_c0 | 3.75073942    | 3.55478803    | 3.2303241     | 3.60246519     | 3.19329341     | 3.0746171      | 0.0008559 | -1.107449 | down      | PREDICTED: F-box/kelch-repeat protein At1g30090-like isoform X2 [Sesamum indicum]                          |
| c43698.graph_c0 | 1.74698648    | 1.35385999    | 0.86901166    | 8.30677622     | 8.52502147     | 9.14675792     | 2.004E-05 | 1.697815  | up        | PREDICTED: coiled-coil domain-containing protein 93 [Sesamum indicum]                                      |
| c43699.graph_c0 | 8.02988129    | 6.23996577    | 5.97399311    | 6.71628786     | 6.80574075     | 6.92882615     | 0.0072875 | -1.000828 | down      | -                                                                                                          |
| c43702.graph_c0 | 1.07028636    | 1.93535655    | 1.46409327    | 5.0573161      | 6.70544039     | 7.55655248     | 0.0011096 | 1.087729  | up        | PREDICTED: probable beta-1,3-galactosyltransferase 11 [Sesamum indicum]                                    |
| c43708.graph_c0 | 43.6127045    | 46.8695278    | 41.6580484    | 26.1016004     | 19.2369383     | 14.7874832     | 1.571E-51 | -2.144305 | down      | PREDICTED: uncharacterized protein LOC105161926 [Sesamum indicum]                                          |
| c43713.graph_c0 | 1.47369333    | 1.19857482    | 1.42031571    | 181.502494     | 263.587046     | 348.12311      | 4.773E-24 | 6.572253  | up        | PREDICTED: fatty-acid-binding protein 1-like [Nicotiana glauca]                                            |
| c43714.graph_c0 | 1.75249546    | 1.65679196    | 2.00180093    | 1.16603725     | 1.71038088     | 1.8356352      | 0.0087374 | -1.226055 | down      | PREDICTED: uncharacterized protein LOC105158948 [Sesamum indicum]                                          |
| c43717.graph_c0 | 2.026549      | 1.50843       | 1.20193648    | 0              | 0              | 0              | 4.67E-28  | -Inf      | down      | glutathione peroxidase [Micromonas pusilla CCMP1545]                                                       |
| c43730.graph_c0 | 0.62776199    | 0.86403708    | 0.40334951    | 3.54230367     | 3.6760567      | 4.24544395     | 0.0033998 | 1.582798  | up        | PREDICTED: basic leucine zipper 43-like [Sesamum indicum]                                                  |



| #ID             | 0 h-1<br>FPKM | 0 h-2<br>FPKM | 0 h-3<br>FPKM | 48 h-1<br>FPKM | 48 h-2<br>FPKM | 48 h-3<br>FPKM | FDR       | log2FC    | regulated | nr_annotation                                                                                             |
|-----------------|---------------|---------------|---------------|----------------|----------------|----------------|-----------|-----------|-----------|-----------------------------------------------------------------------------------------------------------|
| c43731.graph_c2 | 20.2268938    | 20.1556699    | 22.3910084    | 2.10478169     | 3.50815728     | 3.62078937     | 4.37E-99  | -3.79289  | down      | hypothetical protein MIMGU_mgv1a004451mg [Erythranthe guttata]                                            |
| c43734.graph_c0 | 14.8540763    | 16.4922579    | 15.5681649    | 11.864123      | 16.7315327     | 16.3097068     | 4.65E-14  | -1.086756 | down      | PREDICTED: uncharacterized protein LOC105168011 [Sesamum indicum]                                         |
| c43736.graph_c0 | 0             | 0             | 0             | 3.59937253     | 7.38019113     | 6.71533878     | 2.493E-10 | Inf       | up        | unnamed protein product [Coffea canephora]                                                                |
| c43736.graph_c1 | 0             | 0             | 0             | 6.34311168     | 9.17156117     | 12.088972      | 5.318E-19 | Inf       | up        | hypothetical protein MIMGU_mgv1a003774mg [Erythranthe guttata]                                            |
| c43741.graph_c0 | 0.07235098    | 0.10863515    | 0.04648694    | 4.06592123     | 3.91898285     | 4.59642623     | 1.73E-15  | 4.777055  | up        | unnamed protein product [Coffea canephora]                                                                |
| c43743.graph_c0 | 0.12629723    | 0.06321185    | 0.10819796    | 4.01418689     | 3.53351504     | 3.08865741     | 1.306E-17 | 4.144679  | up        | hypothetical protein MIMGU_mgv1a003562mg [Erythranthe guttata]                                            |
| c43744.graph_c0 | 5.9561807     | 4.83484861    | 4.82390421    | 28.5888885     | 33.0952858     | 37.193141      | 1.704E-24 | 1.64322   | up        | hypothetical protein MIMGU_mgv1a003216mg [Erythranthe guttata]                                            |
| c43744.graph_c1 | 7.61706708    | 9.36267624    | 6.69342388    | 65.2715725     | 73.2469597     | 78.9221474     | 2.045E-38 | 2.181278  | up        | PREDICTED: D-3-phosphoglycerate dehydrogenase 3, chloroplastic [Sesamum indicum]                          |
| c43745.graph_c0 | 8.0768186     | 8.36530769    | 7.61928915    | 40.2152261     | 46.6584294     | 44.049775      | 1.431E-16 | 1.424877  | up        | hypothetical protein L484_019510 [Morus notabilis]                                                        |
| c43748.graph_c0 | 15.0342719    | 16.2010606    | 15.2782825    | 9.15125748     | 9.99409623     | 12.0097465     | 5.799E-19 | -1.598563 | down      | PREDICTED: phosphoglucan phosphatase LSF1, chloroplastic [Sesamum indicum]                                |
| c43749.graph_c0 | 0.134143      | 0.13427732    | 0.08618953    | 0.83417363     | 1.44011317     | 1.70440911     | 3.174E-05 | 2.464574  | up        | PREDICTED: cytochrome c oxidase copper chaperone 1 [Sesamum indicum]                                      |
| c43754.graph_c1 | 7.96811394    | 7.65598205    | 6.78056754    | 4.5910353      | 6.47619068     | 6.94681306     | 2.22E-11  | -1.33723  | down      | PREDICTED: 101y1p01ygiutamate synthase [Sesamum indicum]                                                  |
| c43759.graph_c0 | 0.84949411    | 1.20838465    | 1.35017836    | 4.92220114     | 7.54898928     | 7.03691242     | 1.458E-07 | 1.488806  | up        | PREDICTED: BTB/POZ domain-containing protein At5g66560 [Sesamum indicum]                                  |
| c43761.graph_c0 | 0.04954292    | 0.17357386    | 0.03183231    | 1.30080187     | 1.3296895      | 1.48234271     | 5.489E-07 | 3.001131  | up        | PREDICTED: probable inactive leucine-rich repeat receptor-like protein kinase At5g20690 [Sesamum indicum] |
| c43763.graph_c0 | 0.69913324    | 0.75815275    | 0.82354606    | 7.29965423     | 8.01740362     | 9.93381761     | 8.144E-09 | 2.446375  | up        | PREDICTED: squamosa promoter-binding-like protein 16-like isoform X1 [Solanum tuberosum]                  |
| c43763.graph_c1 | 0.43552266    | 0.43595877    | 0.47971188    | 2.69398546     | 3.15756274     | 2.6010999      | 0.002251  | 1.625026  | up        | -                                                                                                         |
| c43764.graph_c1 | 19.8093363    | 19.4396012    | 20.6046797    | 10.8637422     | 10.3313478     | 9.76220031     | 1.581E-30 | -1.967652 | down      | PREDICTED: uncharacterized protein LOC105178804 isoform X1 [Sesamum indicum]                              |
| c43765.graph_c0 | 0             | 0             | 0             | 3.57155334     | 8.19786        | 2.42129271     | 0.0001165 | Inf       | up        | hypothetical protein EMIHUDDRAFT_444197 [Emiliania huxleyi CCMP1516]                                      |
| c43768.graph_c0 | 8.77071002    | 7.53841246    | 8.99886501    | 0.71917567     | 1.14281912     | 1.11044626     | 1.649E-73 | -4.116214 | down      | PREDICTED: QWRF motif-containing protein 2 [Sesamum indicum]                                              |
| c43769.graph_c0 | 1.70178386    | 1.3448589     | 0.95914896    | 12.7623956     | 15.5307592     | 17.9883376     | 7.166E-22 | 2.513188  | up        | PREDICTED: telomere repeat-binding protein 4 [Sesamum indicum]                                            |
| c43777.graph_c0 | 4.08575449    | 3.60584034    | 3.47952606    | 40.268798      | 43.6509021     | 41.0034309     | 2.871E-53 | 2.465978  | up        | PREDICTED: probable sugar phosphate/phosphate translocator At3g14410 [Sesamum indicum]                    |

| #ID             | 0 h-1<br>FPKM | 0 h-2<br>FPKM | 0 h-3<br>FPKM | 48 h-1<br>FPKM | 48 h-2<br>FPKM | 48 h-3<br>FPKM | FDR       | log2FC    | regulated | nr_annotation                                                                                          |
|-----------------|---------------|---------------|---------------|----------------|----------------|----------------|-----------|-----------|-----------|--------------------------------------------------------------------------------------------------------|
| c43779.graph_c0 | 1.9627234     | 0.71135283    | 0.65228723    | 0              | 0              | 0              | 5.05E-06  | -Inf      | down      | PREDICTED: 2,3-bisphosphoglycerate-independent phosphoglycerate mutase [Elaeis guineensis]             |
| c43780.graph_c0 | 19.9620858    | 23.3258495    | 23.9970983    | 3.48527277     | 3.18159718     | 3.89296406     | 3.327E-67 | -3.690391 | down      | PREDICTED: mitogen-activated protein kinase 9-like [Sesamum indicum]                                   |
| c43781.graph_c0 | 12.1876941    | 12.3957682    | 10.8841419    | 5.8973271      | 7.72071328     | 9.44074826     | 1.516E-20 | -1.643678 | down      | PREDICTED: probable serine/threonine-protein kinase abkC isoform X1 [Sesamum indicum]                  |
| c43782.graph_c0 | 3.64355587    | 3.47887183    | 4.0338209     | 34.4963557     | 55.9659195     | 55.5076902     | 1.01E-12  | 2.682501  | up        | PREDICTED: pentatricopeptide repeat-containing protein At1g06140, mitochondrial-like [Sesamum indicum] |
| c43784.graph_c0 | 8.94943769    | 9.95694687    | 10.2917429    | 4.70006441     | 4.67316715     | 5.60727023     | 1.097E-23 | -1.982657 | down      | PREDICTED: histone-lysine N-methyltransferase ATXR4 [Sesamum indicum]                                  |
| c43789.graph_c2 | 5.64326574    | 5.16472377    | 5.38706622    | 1.18833017     | 0.78680733     | 0.66085565     | 1.323E-11 | -3.626429 | down      | PREDICTED: coiled-coil domain-containing protein 94-like [Sesamum indicum]                             |
| c43789.graph_c3 | 15.9609367    | 15.9198587    | 14.7601884    | 16.1484239     | 16.1615278     | 14.8126837     | 1.94E-10  | -1.001107 | down      | PREDICTED: lysophospholipid acyltransferase LPEAT1-like isoform X1 [Sesamum indicum]                   |
| c43789.graph_c4 | 3.07860923    | 3.03637299    | 3.49070713    | 2.83621563     | 1.76742738     | 1.48449859     | 1.508E-05 | -1.665501 | down      | PREDICTED: uncharacterized protein LOC105175802 [Sesamum indicum]                                      |
| c43791.graph_c1 | 2.29487247    | 1.08477493    | 1.8840846     | 11.2169323     | 11.6341215     | 11.7051833     | 2.633E-06 | 1.696506  | up        | PREDICTED: uncharacterized protein LOC105165414 [Sesamum indicum]                                      |
| c43796.graph_c0 | 0             | 0             | 0.25520617    | 5.85476305     | 5.76630447     | 5.94212353     | 3.965E-17 | 5.054964  | up        | geranyl diphosphate synthase large subunit [Annonium muricatum]                                        |
| c43798.graph_c0 | 4.99631328    | 4.80441411    | 4.19604891    | 41.8250461     | 45.8059946     | 45.8584828     | 1.786E-37 | 2.236117  | up        | PREDICTED: methyltransferase-like protein 13 isoform X1 [Sesamum indicum]                              |
| c43799.graph_c0 | 6.27907187    | 2.86538444    | 4.47940165    | 0              | 0              | 0              | 2.277E-20 | -Inf      | down      | hypothetical protein THAPSDRAFT_261727 [Thalassiosira pseudonana CCMP1335]                             |
| c43802.graph_c0 | 23.0745188    | 20.4920997    | 24.2275842    | 209.661058     | 189.772282     | 198.319368     | 8.413E-49 | 2.123503  | up        | PREDICTED: ethylene-responsive transcription factor RAP2-3 [Sesamum indicum]                           |
| c43808.graph_c0 | 38.483976     | 32.7868766    | 38.1609167    | 20.0237406     | 19.8146748     | 19.375145      | 4.28E-39  | -1.903577 | down      | PREDICTED: (S)-coclaurine N-methyltransferase isoform X1 [Sesamum indicum]                             |
| c43809.graph_c0 | 47.8107847    | 49.4611671    | 44.7585473    | 48.5507072     | 44.5082109     | 40.4336167     | 7.278E-15 | -1.103544 | down      | hypothetical protein [Nicotiana tabacum]                                                               |
| c43813.graph_c0 | 2.30854631    | 2.00274357    | 1.87882982    | 0.49624947     | 0.52571614     | 0.69387967     | 3.861E-08 | -2.870044 | down      | -                                                                                                      |
| c43813.graph_c1 | 74.0821308    | 75.3966033    | 70.979846     | 49.7751211     | 53.1125812     | 50.8114279     | 8.506E-28 | -1.538197 | down      | PREDICTED: FAC1 complex subunit SSKP1 [Sesamum indicum]                                                |
| c43816.graph_c0 | 0             | 0.27364625    | 0.87823623    | 10.8294891     | 22.9450611     | 22.7454755     | 1.795E-09 | 4.564764  | up        | hypothetical protein VITISV_012452 [Vitis vinifera]                                                    |
| c43818.graph_c0 | 9.5613458     | 10.2720863    | 8.9112387     | 8.93759818     | 9.36575675     | 9.18714353     | 3.29E-08  | -1.081501 | down      | PREDICTED: pentatricopeptide repeat-containing protein At3g61360 [Sesamum indicum]                     |
| c43820.graph_c0 | 14.2792034    | 14.7357513    | 13.1715571    | 4.3307083      | 4.3291464      | 3.80997838     | 1.106E-66 | -2.77379  | down      | PREDICTED: metal tolerance protein 9-like [Sesamum indicum]                                            |
| c43826.graph_c0 | 24.632141     | 24.5708941    | 23.4918044    | 9.56732029     | 8.16696724     | 8.61847643     | 2.786E-47 | -2.478116 | down      | PREDICTED: protein REVEILLE 6-like isoform X1 [Sesamum indicum]                                        |
| c43829.graph_c0 | 6.39743516    | 3.75497963    | 3.84890281    | 0              | 0              | 0              | 7.178E-26 | -Inf      | down      | predicted protein, partial [Micromonas sp. RCC299]                                                     |

| #ID             | 0 h-1<br>FPKM | 0 h-2<br>FPKM | 0 h-3<br>FPKM | 48 h-1<br>FPKM | 48 h-2<br>FPKM | 48 h-3<br>FPKM | FDR       | log2FC    | regulated | nr_annotation                                                                                                                           |
|-----------------|---------------|---------------|---------------|----------------|----------------|----------------|-----------|-----------|-----------|-----------------------------------------------------------------------------------------------------------------------------------------|
| c43831.graph_c1 | 1.34132746    | 1.50298947    | 1.56930137    | 15.1052734     | 19.714561      | 22.0563388     | 6.948E-23 | 2.663423  | up        | ABC transporter-like [Arabidopsis thaliana]                                                                                             |
| c43836.graph_c0 | 9.87198853    | 10.3000378    | 8.81514384    | 7.41351319     | 8.43309095     | 7.65986959     | 5.426E-15 | -1.320162 | down      | hypothetical protein MIMGU_mgv1a020553mg, partial [Erythranthe guttata]                                                                 |
| c43838.graph_c0 | 19.6826702    | 19.8437841    | 18.7882291    | 14.5974663     | 17.5322724     | 16.4819941     | 7.742E-18 | -1.282448 | down      | PREDICTED: uncharacterized protein LOC105159284 [Sesamum indicum]                                                                       |
| c43840.graph_c0 | 10.5318327    | 10.1948277    | 10.9063766    | 5.65097135     | 8.6220933      | 8.00084705     | 2.366E-13 | -1.531136 | down      | hypothetical protein M569_07122 [Genlisea aurea]                                                                                        |
| c43843.graph_c0 | 0.27720661    | 0.27748419    | 0.25907016    | 5.36299699     | 7.15714502     | 7.02366771     | 8.788E-21 | 3.56409   | up        | PREDICTED: interactor of constitutive active ROPs 2, chloroplastic-like isoform X2 [Sesamum indicum]                                    |
| c43844.graph_c0 | 51.616544     | 52.0817138    | 46.4681109    | 11.4005558     | 11.9431253     | 11.0188846     | 3.58E-102 | -3.144198 | down      | PREDICTED: uncharacterized protein LOC105180214 [Sesamum indicum]                                                                       |
| c43848.graph_c0 | 7.4494775     | 7.30976063    | 7.02220656    | 31.808845      | 30.9711927     | 30.0107584     | 6.389E-12 | 1.074803  | up        | PREDICTED: dihydrolipoyllysine-residue acetyltransferase component 1 of pyruvate dehydrogenase complex, mitochondrial [Sesamum indicum] |
| c43849.graph_c0 | 20.6584543    | 16.4357332    | 16.4192005    | 94.554517      | 95.7986683     | 93.9717034     | 8.324E-20 | 1.39373   | up        | PREDICTED: probable ubiquitin-conjugating enzyme E2 33 [Sesamum indicum]                                                                |
| c43851.graph_c0 | 0.41669978    | 0.48663655    | 0.3792953     | 8.14168859     | 6.26974219     | 5.76422858     | 2.054E-13 | 2.965588  | up        | PREDICTED: serine/threonine-protein kinase D6PKL1-like [Sesamum indicum]                                                                |
| c43851.graph_c1 | 0.68565278    | 0.11438989    | 0             | 3.89528639     | 3.68046646     | 2.90394796     | 1.781E-05 | 2.716807  | up        | PREDICTED: serine/threonine-protein kinase D6PKL1-like [Sesamum indicum]                                                                |
| c43852.graph_c0 | 4.85052311    | 5.35687484    | 4.76994188    | 18.0632879     | 24.6699282     | 27.1236876     | 1.747E-07 | 1.198441  | up        | PREDICTED: putative 3,4-dihydroxy-2-butanone kinase [Sesamum indicum]                                                                   |
| c43853.graph_c0 | 88.2481205    | 80.8890157    | 85.1622751    | 22.6625521     | 9.56971245     | 6.62765819     | 3.01E-134 | -3.706307 | down      | PREDICTED: BTB/POZ and TAZ domain-containing protein 1 [Sesamum indicum]                                                                |
| c43855.graph_c1 | 4.79136477    | 4.8345319     | 5.22121523    | 36.2663914     | 36.6428796     | 34.9090014     | 1.965E-34 | 1.842189  | up        | hypothetical protein MIMGU_mgv1a001401mg [Erythranthe guttata]                                                                          |
| c43856.graph_c0 | 50.840675     | 47.2664303    | 54.5330632    | 7.5282587      | 6.38928461     | 6.20381642     | 1.32E-116 | -3.938309 | down      | PREDICTED: uncharacterized protein LOC105161639 [Sesamum indicum]                                                                       |
| c43857.graph_c0 | 297.189927    | 299.829413    | 286.296771    | 210.669847     | 216.068217     | 202.356929     | 1.543E-20 | -1.506618 | down      | PREDICTED: uncharacterized protein LOC105170581 [Sesamum indicum]                                                                       |
| c43858.graph_c0 | 34.501068     | 33.7625643    | 33.4649118    | 23.9584332     | 24.2767687     | 21.4652941     | 1.322E-28 | -1.561975 | down      | PREDICTED: ubiquitin carboxyl-terminal hydrolase 23 [Sesamum indicum]                                                                   |
| c43860.graph_c0 | 0.35614146    | 0.89124521    | 0.53393186    | 3.71847508     | 4.4027174      | 4.7197301      | 0.0002442 | 1.828862  | up        | hypothetical protein SORBIDRAFT_02g006760 [Sorghum bicolor]                                                                             |
| c43865.graph_c0 | 31.1317159    | 31.8157435    | 31.7920704    | 14.420397      | 16.1678006     | 13.8291634     | 2.5E-40   | -2.111466 | down      | PREDICTED: chavicol O-methyltransferase-like [Sesamum indicum]                                                                          |
| c43867.graph_c0 | 0.40732267    | 0.32618444    | 0.23554159    | 2.06388718     | 2.54421901     | 2.55431331     | 2.289E-05 | 1.869297  | up        | unnamed protein product [Coffea canephora]                                                                                              |

| #ID             | 0 h-1<br>FPKM | 0 h-2<br>FPKM | 0 h-3<br>FPKM | 48 h-1<br>FPKM | 48 h-2<br>FPKM | 48 h-3<br>FPKM | FDR       | log2FC    | regulated | nr_annotation                                                                                          |
|-----------------|---------------|---------------|---------------|----------------|----------------|----------------|-----------|-----------|-----------|--------------------------------------------------------------------------------------------------------|
| c43870.graph_c0 | 1.36595579    | 1.8406279     | 1.8903309     | 22.2641339     | 21.9966487     | 24.5477841     | 3.574E-24 | 2.734554  | up        | PREDICTED: nitrogen regulatory protein P-II homolog [Musa acuminata subsp. malaccensis]                |
| c43874.graph_c0 | 8.93365234    | 9.16656293    | 7.27004351    | 44.7732209     | 35.2190073     | 31.2711464     | 0.000188  | 1.123427  | up        | PREDICTED: putative lysine-specific demethylase JM16 [Sesamum indicum]                                 |
| c43875.graph_c0 | 38.9510379    | 41.6269995    | 36.0781266    | 25.6005699     | 26.2503562     | 22.518755      | 2.516E-31 | -1.665155 | down      | PREDICTED: uncharacterized protein LOC105157181 [Sesamum indicum]                                      |
| c43877.graph_c0 | 0.02254464    | 0             | 0.02897075    | 1.03847956     | 0.61608018     | 0.72074564     | 1.071E-07 | 4.509688  | up        | PREDICTED: probable cyclic nucleotide-gated ion channel 20, chloroplastic isoform X1 [Sesamum indicum] |
| c43878.graph_c0 | 8.27592199    | 8.39041688    | 7.60121761    | 5.47387015     | 6.93797165     | 7.06674304     | 4.075E-12 | -1.338123 | down      | PREDICTED: putative GTP-binding protein 6 [Sesamum indicum]                                            |
| c43879.graph_c0 | 66.2147348    | 66.3561874    | 64.1058337    | 37.5552421     | 39.7852252     | 42.3397843     | 2.721E-34 | -1.735277 | down      | PREDICTED: probable 3-hydroxyacyl-CoA dehydrogenase B0272.3 [Sesamum indicum]                          |
| c43881.graph_c0 | 0             | 0             | 0             | 7.25371459     | 6.98584641     | 6.87342277     | 2.366E-15 | Inf       | up        | hypothetical protein MIMGU_mgv1a004314mg [Erythranthe guttata]                                         |
| c43887.graph_c0 | 10.8990558    | 7.88874721    | 9.39460482    | 8.43437371     | 8.67335897     | 8.19211279     | 1.073E-08 | -1.17268  | down      | PREDICTED: uncharacterized protein LOC105168322 isoform X1 [Sesamum indicum]                           |
| c43888.graph_c1 | 5.04964576    | 5.52710429    | 4.36642635    | 4.52163136     | 4.28347283     | 4.83572163     | 0.000187  | -1.147023 | down      | PREDICTED: probable tetraacyldisaccharide 4-kinase, mitochondrial isoform X1 [Sesamum indicum]         |
| c43889.graph_c0 | 18.800262     | 14.1623236    | 18.3042016    | 1.1045936      | 0.84253174     | 0.90423188     | 1.043E-53 | -5.181616 | down      | PREDICTED: uncharacterized protein LOC102584927 isoform X1 [Solanum tuberosum]                         |
| c43890.graph_c0 | 28.9198883    | 32.6976188    | 27.3153987    | 130.051792     | 141.496814     | 144.116154     | 7.819E-18 | 1.206554  | up        | PREDICTED: plasma membrane ATPase 5 [Sesamum indicum]                                                  |
| c43900.graph_c0 | 0.33211551    | 0.49867211    | 0.42678158    | 3.41662556     | 4.15972445     | 3.81145973     | 2.97E-05  | 2.157351  | up        | PREDICTED: 5'-nucleotidase domain-containing protein 4 [Sesamum indicum]                               |
| c43900.graph_c1 | 0.85613143    | 0.73456176    | 1.02157973    | 4.45065753     | 6.38604711     | 7.82007918     | 4.461E-05 | 1.808443  | up        | PREDICTED: 5'-nucleotidase domain-containing protein 4 [Sesamum indicum]                               |
| c43902.graph_c1 | 0             | 0             | 0             | 2.01858205     | 2.21218232     | 3.2825681      | 1.042E-11 | Inf       | up        | PREDICTED: uncharacterized protein LOC105173250 [Sesamum indicum]                                      |
| c43902.graph_c4 | 0.79336444    | 0.73533229    | 0.75518868    | 5.46820788     | 6.56720214     | 6.52758302     | 1.2E-08   | 2.002305  | up        | PREDICTED: la-related protein 1A-like [Sesamum indicum]                                                |
| c43903.graph_c0 | 0.66584973    | 0.08331456    | 0.32086623    | 18.3260481     | 17.4646801     | 21.9010744     | 4.203E-25 | 4.738547  | up        | PREDICTED: uncharacterized protein LOC105156092 [Sesamum indicum]                                      |
| c43907.graph_c0 | 0.5841318     | 0.45345378    | 0.45957091    | 10.5321747     | 11.9254443     | 11.5604212     | 1.032E-63 | 3.488167  | up        | PREDICTED: uncharacterized protein LOC105157864 isoform X2 [Sesamum indicum]                           |
| c43908.graph_c0 | 0.17455214    | 0.17472692    | 0.22430641    | 69.2817969     | 89.2389047     | 105.717234     | 6.557E-64 | 7.821501  | up        | hypothetical protein MIMGU_mgv1a002930mg [Erythranthe guttata]                                         |
| c43909.graph_c0 | 23.8778326    | 27.2802181    | 23.3307773    | 7.59469713     | 7.93207491     | 9.22229456     | 1.435E-68 | -2.608299 | down      | PREDICTED: heterogeneous nuclear ribonucleoprotein 1-like [Sesamum indicum]                            |

| #ID             | 0 h-1<br>FPKM | 0 h-2<br>FPKM | 0 h-3<br>FPKM | 48 h-1<br>FPKM | 48 h-2<br>FPKM | 48 h-3<br>FPKM | FDR       | log2FC    | regulated | nr_annotation                                                                                                   |
|-----------------|---------------|---------------|---------------|----------------|----------------|----------------|-----------|-----------|-----------|-----------------------------------------------------------------------------------------------------------------|
| c43910.graph_c0 | 0.80762656    | 0.73914082    | 0.74130865    | 7.37660795     | 9.03072993     | 11.0277078     | 3.558E-17 | 2.561788  | up        | PREDICTED: tetratricopeptide repeat protein 7A [Sesamum indicum]                                                |
| c43915.graph_c0 | 58.4444727    | 59.7196961    | 56.5336858    | 54.3716463     | 60.4669939     | 55.022067      | 3.704E-14 | -1.058823 | down      | PREDICTED: uncharacterized protein LOC105160776 [Sesamum indicum]                                               |
| c43917.graph_c1 | 17.828969     | 18.6893759    | 15.585333     | 10.6799107     | 12.583636      | 12.4196582     | 4.497E-20 | -1.56495  | down      | PREDICTED: nicotinate phosphoribosyltransferase-like [Sesamum indicum]                                          |
| c43920.graph_c0 | 73.1107296    | 68.1635414    | 66.642173     | 48.1579002     | 47.7374017     | 45.2665197     | 2.105E-28 | -1.574743 | down      | PREDICTED: serine/arginine-rich splicing factor RS31-like [Eucalyptus grandis]                                  |
| c43921.graph_c0 | 3.99305541    | 4.50372264    | 3.83035799    | 23.8335918     | 34.9640999     | 44.8573871     | 2.765E-06 | 2.046885  | up        | PREDICTED: hexose carrier protein HEX6-like [Sesamum indicum]                                                   |
| c43921.graph_c1 | 0             | 0             | 0             | 4.32896573     | 5.82071043     | 10.2223173     | 1.361E-06 | Inf       | up        | PREDICTED: hexose carrier protein HEX6-like [Sesamum indicum]                                                   |
| c43922.graph_c0 | 3.4797001     | 3.39537312    | 3.30669421    | 19.2074213     | 21.4894729     | 21.3333474     | 9.211E-17 | 1.587946  | up        | PREDICTED: zinc finger CCCH domain-containing protein 33 isoform X4 [Sesamum indicum]                           |
| c43924.graph_c0 | 11.7778451    | 10.3944153    | 10.5676312    | 7.47979572     | 8.33203633     | 9.85467662     | 1.121E-12 | -1.371174 | down      | PREDICTED: uncharacterized vacuolar membrane protein YML018C isoform X2 [Sesamum indicum]                       |
| c43925.graph_c0 | 82.8736261    | 86.0661668    | 79.0938349    | 44.3345686     | 58.3748634     | 53.864216      | 1.807E-32 | -1.685015 | down      | -                                                                                                               |
| c43928.graph_c0 | 33.1265789    | 29.5127387    | 33.0611762    | 20.9394198     | 24.7265471     | 24.1684609     | 4.881E-24 | -1.475393 | down      | hypothetical protein MIMGU_mgv1a006580mg [Erythranthe guttata]                                                  |
| c43929.graph_c0 | 185.05218     | 189.018643    | 198.966735    | 205.680556     | 137.786794     | 114.08497      | 4.347E-11 | -1.333012 | down      | PREDICTED: sucrose synthase 2, parvial [Sesamum indicum]                                                        |
| c43936.graph_c0 | 16.1762239    | 17.4801845    | 16.3480193    | 15.7805067     | 17.6010748     | 17.0684055     | 3.181E-11 | -1.006281 | down      | PREDICTED: LMBR1 domain-containing protein 2 homolog A [Sesamum indicum]                                        |
| c43937.graph_c1 | 87.1924424    | 88.2269745    | 83.0064956    | 80.3688779     | 77.0271711     | 72.6383498     | 1.914E-16 | -1.183448 | down      | PREDICTED: protein decapping 5-like isoform X2 [Sesamum indicum]                                                |
| c43942.graph_c0 | 0             | 0             | 0             | 1.59553313     | 1.48973291     | 1.85282331     | 6.365E-14 | Inf       | up        | lupeol synthase [Olea europaea]                                                                                 |
| c43945.graph_c0 | 20.3014171    | 19.1729229    | 18.2557083    | 15.288158      | 15.4694023     | 15.5611708     | 6.576E-21 | -1.33448  | down      | PREDICTED: putative nuclear matrix constituent protein 1-like protein [Sesamum indicum]                         |
| c43947.graph_c0 | 10.0423446    | 8.52222537    | 8.10302049    | 6.12213631     | 7.54243014     | 7.98841852     | 1.751E-14 | -1.320517 | down      | PREDICTED: squamosa promoter-binding-like protein 7 [Sesamum indicum]                                           |
| c43949.graph_c0 | 0.35461754    | 0.26622948    | 0.45569758    | 2.45022609     | 2.68224135     | 2.90692858     | 0.0006663 | 1.876903  | up        | PREDICTED: probable nucleoside diphosphate kinase 5 [Sesamum indicum]                                           |
| c43951.graph_c0 | 8.55668398    | 8.33718336    | 8.36061883    | 4.36129112     | 4.76850272     | 4.56547131     | 3.562E-22 | -1.901509 | down      | PREDICTED: switch 2 isoform X1 [Sesamum indicum]                                                                |
| c43953.graph_c0 | 1.48204522    | 1.83675052    | 1.99517663    | 0              | 0.03443881     | 0.14462931     | 1.347E-21 | -5.936762 | down      | PREDICTED: G-type lectin 5-receptor-like serine/threonine-protein kinase At5g24080 isoform X1 [Sesamum indicum] |
| c43955.graph_c0 | 1.02749211    | 1.10470773    | 1.36927056    | 7.43250603     | 7.24244616     | 7.54925754     | 1.748E-06 | 1.64592   | up        | PREDICTED: alkylated DNA repair protein alkB homolog 8 isoform X2 [Sesamum indicum]                             |

| #ID             | 0 h-1<br>FPKM | 0 h-2<br>FPKM | 0 h-3<br>FPKM | 48 h-1<br>FPKM | 48 h-2<br>FPKM | 48 h-3<br>FPKM | FDR       | log2FC    | regulated | nr_annotation                                                                                         |
|-----------------|---------------|---------------|---------------|----------------|----------------|----------------|-----------|-----------|-----------|-------------------------------------------------------------------------------------------------------|
| c43957.graph_c0 | 78.5587312    | 79.7624499    | 80.8803915    | 75.3369173     | 86.4296688     | 76.8829825     | 4.103E-13 | -1.022782 | down      | PREDICTED: beta-1,3-galactosyltransferase 7-like [Sesamum indicum]                                    |
| c43962.graph_c0 | 1.55767363    | 1.5592334     | 1.87112843    | 14.2255202     | 11.2365628     | 9.57661161     | 4.572E-07 | 1.798992  | up        | PREDICTED: uncharacterized protein LOC105172439 [Sesamum indicum]                                     |
| c43963.graph_c0 | 1.88259878    | 1.72295673    | 1.58976918    | 131.614118     | 135.596996     | 138.141532     | 1.98E-172 | 5.269179  | up        | PREDICTED: uncharacterized protein LOC105158952 [Sesamum indicum]                                     |
| c43967.graph_c1 | 67.5156205    | 71.504195     | 74.5881856    | 22.3735543     | 25.022711      | 21.3089934     | 5.455E-66 | -2.655742 | down      | phytosulfokine precursor [Avicennia marina]                                                           |
| c43968.graph_c0 | 0.9393793     | 1.27334993    | 0.70416476    | 7.95102314     | 10.6196566     | 9.4330301      | 2.274E-19 | 2.245115  | up        | PREDICTED: probable serine/threonine-protein kinase At1g54610 isoform X2 [Sesamum indicum]            |
| c43969.graph_c0 | 5.62735155    | 4.78093812    | 5.10449615    | 24.2659311     | 23.0069041     | 23.1810132     | 1.894E-12 | 1.167259  | up        | PREDICTED: external alternative NAD(P)H-ubiquinone oxidoreductase B2, mitochondrial [Sesamum indicum] |
| c43970.graph_c0 | 9.91376341    | 9.11756442    | 8.35031194    | 31.518513      | 42.1711903     | 40.0414981     | 2.215E-11 | 1.033443  | up        | PREDICTED: putative UDP-glucuronate:xylan alpha-glucuronosyltransferase 3 [Sesamum indicum]           |
| c43972.graph_c0 | 105.992448    | 103.077721    | 106.598932    | 462.739024     | 471.610095     | 477.329152     | 4.142E-16 | 1.142882  | up        | hypothetical protein JCGZ_19923 [Jatropha curcas]                                                     |
| c43975.graph_c0 | 522.283969    | 501.898149    | 520.240243    | 116.258207     | 110.769196     | 108.66788      | 7.823E-87 | -3.21827  | down      | PREDICTED: WD repeat-containing protein 82-B isoform X1 [Sesamum indicum]                             |
| c43977.graph_c0 | 68.4922666    | 72.6386535    | 66.0114557    | 55.5317223     | 56.3824637     | 49.7053643     | 2.651E-22 | -1.374153 | down      | PREDICTED: LOW QUALITY PROTEIN: protein EARLY FLOWERING 3 [Sesamum indicum]                           |
| c43978.graph_c0 | 3.57675935    | 3.61883922    | 3.06418492    | 13.8892092     | 15.4271083     | 12.9890723     | 3.027E-05 | 1.02734   | up        | PREDICTED: tryptophan--tRNA ligase, mitochondrial isoform X2 [Sesamum indicum]                        |
| c43983.graph_c0 | 6.17394724    | 5.53711026    | 5.96178996    | 3.84669144     | 4.77170197     | 4.82697333     | 6.409E-08 | -1.415972 | down      | PREDICTED: cryptochrome DASH, chloroplastic/mitochondrial [Sesamum indicum]                           |
| c43985.graph_c0 | 21.9929503    | 21.524073     | 21.4993371    | 6.6553116      | 5.61462446     | 6.49394157     | 1.245E-75 | -2.807958 | down      | PREDICTED: uncharacterized protein LOC105162976 [Sesamum indicum]                                     |
| c43986.graph_c0 | 0             | 0.33387802    | 0             | 9.37211653     | 10.5796782     | 14.901288      | 3.357E-13 | 5.69519   | up        | hypothetical protein MIMGU_mgv1a005877mg [Erythranthe guttata]                                        |
| c43987.graph_c0 | 2.58477753    | 2.82856091    | 2.61782505    | 1.89694044     | 2.5867977      | 2.01109844     | 6.678E-06 | -1.327636 | down      | unnamed protein product [Coffea canephora]                                                            |
| c43988.graph_c0 | 12.5089188    | 13.2398881    | 5.66558692    | 3.68391184     | 2.80190823     | 5.71535223     | 0.0001764 | -2.375737 | down      | uncharacterized protein UHOR_12387 [Ustilago hordei]                                                  |
| c43990.graph_c0 | 29.2198758    | 32.0074033    | 27.9955415    | 24.6980203     | 27.6772837     | 27.0113705     | 1.544E-16 | -1.187106 | down      | PREDICTED: ethanolamine-phosphate cytidyltransferase-like [Sesamum indicum]                           |
| c43994.graph_c0 | 3.11305743    | 3.16643557    | 2.70994978    | 12.3044373     | 13.3290832     | 14.735084      | 6.199E-05 | 1.148767  | up        | hypothetical protein MIMGU_mgv1a014320mg [Erythranthe guttata]                                        |
| c43994.graph_c1 | 8.25180505    | 7.66620689    | 8.17816831    | 80.5922084     | 89.6939297     | 84.9738032     | 3.48E-49  | 2.385848  | up        | PREDICTED: heat stress transcription factor A-6b-like [Sesamum indicum]                               |
| c43998.graph_c0 | 7.78864019    | 4.847786      | 5.26098912    | 0              | 0              | 0              | 6.453E-32 | -Inf      | down      | --                                                                                                    |
| c43999.graph_c0 | 3.89604689    | 4.39877877    | 4.51173865    | 75.0829911     | 77.7948643     | 85.3765968     | 6.22E-100 | 3.197611  | up        | hypothetical protein MIMGU_mgv1a001702mg [Erythranthe guttata]                                        |

| #ID             | 0 h-1<br>FPKM | 0 h-2<br>FPKM | 0 h-3<br>FPKM | 48 h-1<br>FPKM | 48 h-2<br>FPKM | 48 h-3<br>FPKM | FDR       | log2FC    | regulated | nr_annotation                                                                         |
|-----------------|---------------|---------------|---------------|----------------|----------------|----------------|-----------|-----------|-----------|---------------------------------------------------------------------------------------|
| c44006.graph_c0 | 0.29301634    | 0.37711254    | 0.26895543    | 3.81780445     | 3.84023316     | 4.32353019     | 1.178E-07 | 2.656841  | up        | PREDICTED: uncharacterized protein LOC105178295 isoform X2 [Sesamum indicum]          |
| c44010.graph_c0 | 76.7650805    | 69.464068     | 78.9000209    | 29.2220502     | 32.2738641     | 33.5539378     | 1.565E-55 | -2.264283 | down      | photosystem II protein I (chloroplast) [Salvia miltiorrhiza]                          |
| c44013.graph_c0 | 2.99082791    | 1.78941131    | 2.95980761    | 0.34837705     | 1.00653611     | 0.70450864     | 3.545E-09 | -2.944462 | down      | PREDICTED: peroxidase 46 [Sesamum indicum]                                            |
| c44014.graph_c0 | 1.54717674    | 1.8472756     | 1.07793074    | 12.1069746     | 12.6985225     | 15.2651638     | 5.832E-26 | 2.147893  | up        | PREDICTED: uncharacterized protein At1g04910-like isoform X1 [Sesamum indicum]        |
| c44014.graph_c1 | 16.4009547    | 23.3566818    | 16.0785034    | 296.195463     | 268.320509     | 242.901147     | 2.78E-35  | 2.841011  | up        | PREDICTED: uncharacterized protein LOC105173450 [Sesamum indicum]                     |
| c44019.graph_c0 | 0.5677718     | 0.31000382    | 0.53062491    | 3.42372056     | 2.66988735     | 2.58098283     | 0.0016301 | 1.609346  | up        | hypothetical protein MIMGU_mgv1a010335mg [Erythranthe guttata]                        |
| c44021.graph_c0 | 56.9874514    | 57.1641059    | 55.5758271    | 48.7308632     | 52.3823375     | 51.0482747     | 5.743E-17 | -1.175938 | down      | PREDICTED: protein disulfide isomerase-like 1-4 [Sesamum indicum]                     |
| c44025.graph_c0 | 7.9640684     | 9.30071708    | 6.54985165    | 1.17392308     | 1.7099901      | 1.17511841     | 5.413E-28 | -3.572078 | down      | PREDICTED: WAT1-related protein At1g25270-like [Sesamum indicum]                      |
| c44028.graph_c0 | 0.6823219     | 0.45533676    | 0.58454044    | 56.993016      | 73.9176623     | 88.0003097     | 1.182E-32 | 5.966851  | up        | -                                                                                     |
| c44029.graph_c0 | 4.84019714    | 3.88921889    | 4.06193957    | 2.00204728     | 2.37800832     | 2.26724862     | 1.286E-10 | -1.963519 | down      | PREDICTED: vesicle-associated protein 1-4-like [Sesamum indicum]                      |
| c44030.graph_c0 | 120.681183    | 113.648583    | 119.742543    | 13.3286161     | 5.67537224     | 3.70436853     | 2.15E-214 | -4.958828 | down      | PREDICTED: KINU-H2 finger protein AIL5 [Sesamum indicum]                              |
| c44032.graph_c1 | 50.561844     | 56.6022477    | 49.2521569    | 14.5706105     | 8.55373169     | 6.3274262      | 9.02E-119 | -3.412065 | down      | PREDICTED: glycosyltransferase family protein 64 protein C5-like [Sesamum indicum]    |
| c44033.graph_c0 | 1.44739227    | 1.7317107     | 1.29311253    | 5.72105898     | 6.37692378     | 6.03409791     | 6.103E-09 | 1.002276  | up        | hypothetical protein MIMGU_mgv1a000017mg [Erythranthe guttata]                        |
| c44036.graph_c0 | 23.1416118    | 24.3781781    | 20.4270964    | 18.4008126     | 17.8532929     | 17.5472669     | 6.129E-20 | -1.351931 | down      | PREDICTED: glucose-6-phosphate 1-dehydrogenase, chloroplastic-like [Sesamum indicum]  |
| c44040.graph_c0 | 0.07867918    | 0.11813695    | 0.17693525    | 1.34096123     | 1.6701482      | 1.72527268     | 2.749E-07 | 2.634524  | up        | PREDICTED: LOW QUALITY PROTEIN: ATP-dependent DNA helicase Q-like 5 [Sesamum indicum] |
| c44043.graph_c0 | 2.31655134    | 2.95656055    | 2.38148815    | 0.05335395     | 0              | 0              | 2.417E-24 | -8.124238 | down      | PREDICTED: uncharacterized protein LOC105165513 [Sesamum indicum]                     |
| c44044.graph_c0 | 0.11205158    | 0.44865514    | 0.14399072    | 4.40444695     | 6.08764249     | 5.9091932      | 2.644E-13 | 3.521598  | up        | PREDICTED: scarecrow-like protein 3 isoform X1 [Sesamum indicum]                      |
| c44050.graph_c2 | 4.75962045    | 4.35172309    | 4.67150527    | 26.3092368     | 31.6022698     | 30.5371941     | 2.176E-19 | 1.661211  | up        | PREDICTED: elongation factor Ts, mitochondrial [Sesamum indicum]                      |
| c44052.graph_c0 | 13.0450051    | 13.3677452    | 8.21602826    | 0.66502266     | 1.05676631     | 0.50719986     | 3.254E-24 | -4.974731 | down      | PREDICTED: ferredoxin--nitrite reductase, chloroplastic [Sesamum indicum]             |
| c44052.graph_c1 | 5.90335295    | 9.88273507    | 7.19366077    | 0.18753634     | 0              | 0.41717176     | 2.342E-21 | -6.263229 | down      | PREDICTED: ferredoxin--nitrite reductase, chloroplastic [Sesamum indicum]             |

| #ID             | 0 h-1<br>FPKM | 0 h-2<br>FPKM | 0 h-3<br>FPKM | 48 h-1<br>FPKM | 48 h-2<br>FPKM | 48 h-3<br>FPKM | FDR       | log2FC    | regulated | nr_annotation                                                                                     |
|-----------------|---------------|---------------|---------------|----------------|----------------|----------------|-----------|-----------|-----------|---------------------------------------------------------------------------------------------------|
| c44054.graph_c0 | 195.776595    | 182.911959    | 221.898007    | 111.231006     | 64.7670198     | 34.38968       | 1.163E-22 | -2.516283 | down      | PREDICTED: uncharacterized protein LOC105157696 [Sesamum indicum]                                 |
| c44056.graph_c0 | 71.3816532    | 66.5944965    | 68.839105     | 331.55578      | 349.852428     | 361.013561     | 2.469E-20 | 1.314973  | up        | hypothetical protein Csa_5G600925 [Cucumis sativus]                                               |
| c44062.graph_c0 | 47.6143051    | 50.2536293    | 46.7344556    | 11.4042595     | 10.0678585     | 11.3744198     | 6.5E-93   | -3.153838 | down      | PREDICTED: transcription factor ELFB [Sesamum indicum]                                            |
| c44066.graph_c0 | 6.03388104    | 4.96350113    | 5.22036406    | 27.4087602     | 34.2837744     | 36.582225      | 8.519E-14 | 1.578086  | up        | PREDICTED: 6,7-dimethyl-8-ribityllumazine synthase, chloroplastic [Sesamum indicum]               |
| c44077.graph_c0 | 8.9808397     | 9.55761155    | 9.71851333    | 1.82893096     | 1.6607405      | 2.78978018     | 9.431E-30 | -3.190558 | down      | PREDICTED: PXMP2/4 family protein 4-like [Sesamum indicum]                                        |
| c44077.graph_c1 | 10.5885087    | 10.8000425    | 9.41502994    | 6.05631304     | 6.75876522     | 7.52796473     | 1.207E-11 | -1.61754  | down      | PREDICTED: uncharacterized protein LOC105169472 [Sesamum indicum]                                 |
| c44080.graph_c0 | 0.33077737    | 0.35870098    | 0.24795284    | 13.3320989     | 12.4019907     | 12.1565675     | 2.764E-42 | 4.324399  | up        | PREDICTED: 6-phosphogluconate dehydrogenase, decarboxylating 3-like [Citrus sinensis]             |
| c44081.graph_c0 | 1.10936792    | 1.53169487    | 1.27810773    | 17.4096176     | 17.0246574     | 16.8080193     | 6.943E-24 | 2.69168   | up        | PREDICTED: pheophytinase, chloroplastic isoform X1 [Nicotiana sylvestris]                         |
| c44084.graph_c1 | 131.224501    | 128.075532    | 145.127529    | 7.85606923     | 7.49717562     | 9.04115136     | 2.99E-173 | -5.070508 | down      | PREDICTED: chaperone protein dnaJ 6 [Sesamum indicum]                                             |
| c44085.graph_c1 | 4.71437121    | 4.63329027    | 4.95667118    | 2.36901069     | 4.43376723     | 3.23216158     | 0.0002083 | -1.538674 | down      | -                                                                                                 |
| c44085.graph_c2 | 8.98922812    | 9.03988794    | 8.98451092    | 5.25259476     | 5.28017037     | 5.56071196     | 9.746E-14 | -1.765103 | down      | PREDICTED: CTD small phosphatase-like protein 2 isoform X3 [Sesamum indicum]                      |
| c44086.graph_c0 | 3.57736257    | 3.20958752    | 3.74574651    | 20.5798139     | 24.491484      | 23.0689512     | 8.85E-21  | 1.672429  | up        | PREDICTED: probable apyrase 7 [Sesamum indicum]                                                   |
| c44089.graph_c1 | 3.62370135    | 3.75241028    | 3.85373768    | 1.78431192     | 2.3170955      | 3.12412486     | 5.815E-05 | -1.661024 | down      | PREDICTED: COBRA-like protein 1 [Sesamum indicum]                                                 |
| c44090.graph_c0 | 7.59320991    | 6.98348841    | 8.32118101    | 5.93007695     | 7.03455645     | 6.79315907     | 2.138E-07 | -1.234531 | down      | PREDICTED: tobamovirus multiplication protein 1-like isoform X1 [Sesamum indicum]                 |
| c44091.graph_c0 | 25.2333758    | 24.6210464    | 21.218493     | 22.9983667     | 20.7775263     | 15.7545217     | 1.12E-17  | -1.267203 | down      | PREDICTED: methyl-CpG-binding domain-containing protein 9-like [Sesamum indicum]                  |
| c44095.graph_c0 | 2.92365619    | 2.1356152     | 1.69234863    | 16.7674124     | 16.0150132     | 13.8183898     | 1.386E-15 | 1.776301  | up        | hypothetical protein MIMGU_mgv1a003860mg [Erythranthe guttata]                                    |
| c44100.graph_c0 | 0.49611288    | 0.49660966    | 0.56668861    | 9.5134432      | 11.7461074     | 10.9954685     | 8.46E-41  | 3.348065  | up        | PREDICTED: probable LRR receptor-like serine/threonine-protein kinase At4g36180 [Sesamum indicum] |
| c44101.graph_c0 | 27.3294547    | 27.4973527    | 23.3778749    | 14.0007712     | 15.4486971     | 14.0689727     | 3.353E-40 | -1.862558 | down      | PREDICTED: uncharacterized protein LOC105175040 isoform X2 [Sesamum indicum]                      |
| c44102.graph_c0 | 1.44589862    | 1.8790112     | 1.56466271    | 9.53471747     | 9.28389432     | 8.48393427     | 1.506E-08 | 1.465293  | up        | hypothetical protein MIMGU_mgv1a001743mg [Erythranthe guttata]                                    |
| c44103.graph_c0 | 1.15224998    | 0.57670189    | 0.74034342    | 5.30763919     | 8.4342002      | 9.28798735     | 0.000108  | 2.197885  | up        | hypothetical protein M569_03256, partial [Genlisea aurea]                                         |
| c44103.graph_c1 | 0.35422066    | 0.38412331    | 0.34139068    | 3.48086589     | 3.25541994     | 3.38762105     | 1.021E-06 | 2.213308  | up        | ABC transporter family protein [Hevea brasiliensis]                                               |
| c44105.graph_c0 | 0.19193416    | 0.48031589    | 0.49328599    | 3.27121198     | 4.68304383     | 5.27073562     | 1.164E-05 | 2.473933  | up        | PREDICTED: UDP-galactose transporter 2-like [Sesamum indicum]                                     |



| #ID             | 0 h-1<br>FPKM | 0 h-2<br>FPKM | 0 h-3<br>FPKM | 48 h-1<br>FPKM | 48 h-2<br>FPKM | 48 h-3<br>FPKM | FDR       | log2FC    | regulated | nr_annotation                                                                                               |
|-----------------|---------------|---------------|---------------|----------------|----------------|----------------|-----------|-----------|-----------|-------------------------------------------------------------------------------------------------------------|
| c44106.graph_c1 | 0.91672586    | 0.30588127    | 0.39267634    | 8.86775035     | 11.4819298     | 12.524557      | 1.07E-08  | 3.330557  | up        | phospholipase D [Plantago major]                                                                            |
| c44106.graph_c2 | 0.35492139    | 0.3806537     | 0.32577717    | 27.1624241     | 25.8557033     | 27.1199441     | 1.76E-105 | 5.222864  | up        | PREDICTED: phospholipase D alpha 1 [Sesamum indicum]                                                        |
| c44107.graph_c0 | 0             | 0             | 0             | 3.60487739     | 4.614541       | 5.88059675     | 1.55E-11  | Inf       | up        | -                                                                                                           |
| c44108.graph_c0 | 0.32265289    | 0.29813167    | 0.22325786    | 4.27581093     | 4.11791201     | 4.55737086     | 4.362E-12 | 2.925649  | up        | PREDICTED: homeobox-leucine zipper protein GLABRA 2 [Sesamum indicum]                                       |
| c44110.graph_c0 | 0.98344868    | 0.80309045    | 1.06422778    | 4.816196       | 4.57175147     | 4.07327263     | 0.0004341 | 1.222226  | up        | PREDICTED: glucan endo-1,3-beta-glucosidase 9 [Sesamum indicum]                                             |
| c44111.graph_c0 | 24.1230649    | 27.3692634    | 23.9813077    | 21.390767      | 24.3551985     | 23.2136032     | 4.016E-14 | -1.149192 | down      | PREDICTED: serine/threonine-protein kinase HT1-like [Sesamum indicum]                                       |
| c44112.graph_c1 | 0.21381639    | 0.21403049    | 0.27476252    | 38.4606581     | 40.2748778     | 51.0482747     | 5.847E-66 | 6.50617   | up        | PREDICTED: 2-hydroxyisoflavanone dehydratase-like [Sesamum indicum]                                         |
| c44115.graph_c0 | 11.5105652    | 11.0495765    | 10.3587385    | 8.2291916      | 9.78098074     | 10.4625335     | 5.284E-15 | -1.229499 | down      | PREDICTED: F-box protein At-B isoform X1 [Sesamum indicum]                                                  |
| c44123.graph_c0 | 3.78015682    | 4.14188254    | 4.39814363    | 17.8832469     | 19.4436877     | 19.4298847     | 1.067E-06 | 1.183458  | up        | PREDICTED: ribonuclease H2 subunit B [Sesamum indicum]                                                      |
| c44127.graph_c0 | 32.4685377    | 33.6063247    | 33.2099509    | 13.1690372     | 16.8926491     | 17.0995686     | 6.079E-45 | -2.096202 | down      | PREDICTED: ran-binding protein 9 [Sesamum indicum]                                                          |
| c44131.graph_c0 | 8.65389477    | 7.7881063     | 7.50728027    | 4.27549052     | 4.68922367     | 4.60992344     | 4.181E-19 | -1.836972 | down      | PREDICTED: glutamyl-tRNA(Gln) amidotransferase subunit A, mitochondrial isoform X4 [Sesamum indicum]        |
| c44133.graph_c1 | 119.040684    | 124.472746    | 112.049548    | 30.246027      | 17.5379989     | 15.4349392     | 7.07E-119 | -3.495844 | down      | PREDICTED: syntaxin-121 [Sesamum indicum]                                                                   |
| c44135.graph_c0 | 6.83304309    | 7.05034336    | 5.40352671    | 5.13288283     | 5.84805693     | 3.79164461     | 1.308E-06 | -1.399127 | down      | hypothetical protein MIMGU_mgv1a025425mg [Erythranthe guttata]                                              |
| c44140.graph_c0 | 0.36492235    | 0.19669341    | 0.14428913    | 1.24131793     | 1.58898954     | 1.51871119     | 0.0028428 | 1.608941  | up        | PREDICTED: receptor-like serine/threonine-protein kinase At1g78530 [Sesamum indicum]                        |
| c44142.graph_c0 | 1.29787847    | 1.85960787    | 0.75215647    | 9.51863261     | 8.76747409     | 7.05106467     | 4.264E-07 | 1.688297  | up        | PREDICTED: probable LRR receptor-like serine/threonine-protein kinase At1g56130 [Sesamum indicum]           |
| c44144.graph_c0 | 0.98932602    | 1.01637765    | 0.86985265    | 11.1770304     | 12.2472563     | 12.5916311     | 1.029E-23 | 2.628827  | up        | hypothetical protein MIMGU_mgv1a003454mg [Erythranthe guttata]                                              |
| c44149.graph_c0 | 22.5975799    | 25.3908039    | 22.4124849    | 15.6137734     | 16.6889166     | 17.6848785     | 1.661E-21 | -1.512606 | down      | PREDICTED: 1-phosphatidylinositol-3-phosphate 5-kinase FAB1A isoform X1 [Sesamum indicum]                   |
| c44152.graph_c0 | 78.1455376    | 76.3379313    | 70.460519     | 19.9598227     | 20.7236439     | 21.7175505     | 8.614E-86 | -2.867395 | down      | PREDICTED: WD repeat-containing protein 55 homolog [Sesamum indicum]                                        |
| c44156.graph_c0 | 0             | 0             | 0             | 17.9725041     | 40.926434      | 10.4619423     | 1.933E-05 | Inf       | up        | 60S ribosomal protein L29 [Zea mays]                                                                        |
| c44159.graph_c0 | 40.6097206    | 40.9865123    | 36.08458      | 21.828689      | 44.6315732     | 52.058554      | 3.531E-05 | -1.018592 | down      | PREDICTED: proton-coupled amino acid transporter 3-like [Sesamum indicum]                                   |
| c44162.graph_c0 | 0             | 0             | 0             | 1.92707275     | 2.38816971     | 2.65292859     | 3.192E-14 | Inf       | up        | PREDICTED: probable leucine-rich repeat receptor-like protein kinase At5g49770 isoform X3 [Sesamum indicum] |
| c44162.graph_c1 | 0             | 0             | 0             | 3.89385659     | 4.09125686     | 5.2254947      | 2.293E-22 | Inf       | up        | hypothetical protein MIMGU_mgv1a0019072mg, partial [Erythranthe guttata]                                    |

| #ID             | 0 h-1<br>FPKM | 0 h-2<br>FPKM | 0 h-3<br>FPKM | 48 h-1<br>FPKM | 48 h-2<br>FPKM | 48 h-3<br>FPKM | FDR       | log2FC    | regulated | nr_annotation                                                                                                |
|-----------------|---------------|---------------|---------------|----------------|----------------|----------------|-----------|-----------|-----------|--------------------------------------------------------------------------------------------------------------|
| c44163.graph_c0 | 0.24736507    | 0.30951596    | 0.27813967    | 8.46037293     | 9.05327196     | 9.27691568     | 6.798E-26 | 3.98453   | up        | PREDICTED: probable LRR receptor-like serine/threonine-protein kinase At4g30520 [Sesamum indicum]            |
| c44166.graph_c0 | 90.6443452    | 96.4799792    | 80.9080568    | 32.3233275     | 30.288856      | 26.6855589     | 5.39E-72  | -2.599416 | down      | PREDICTED: probable ADP-ribosylation factor GTPase-activating protein AGD14 [Sesamum indicum]                |
| c44169.graph_c0 | 2.06064815    | 0.68757053    | 1.0788207     | 0              | 0              | 0              | 8.469E-08 | -Inf      | down      | PREDICTED: vacuolar-processing enzyme-like [Musa acuminata subsp. malaccensis]                               |
| c44170.graph_c0 | 0.87792774    | 0.74507538    | 0.68671334    | 120.05469      | 116.08185      | 137.488108     | 8.15E-204 | 6.321648  | up        | PREDICTED: pyruvate, phosphate dikinase, chloroplastic [Populus euphratica]                                  |
| c44173.graph_c0 | 2.84483524    | 3.09411809    | 3.26906259    | 0.85681562     | 0.88099542     | 0.91935191     | 2.11E-15  | -2.812479 | down      | hypothetical protein MIMGU_mgv1a025700mg, partial [Erythranthe guttata]                                      |
| c44178.graph_c0 | 3.00183179    | 2.81703532    | 2.7859525     | 16.2856235     | 21.6064944     | 24.6754566     | 2.813E-12 | 1.839252  | up        | PREDICTED: LOW QUALITY PROTEIN: homeobox-leucine zipper protein ATHB-15 [Sesamum indicum]                    |
| c44178.graph_c1 | 1.11294206    | 0.92838042    | 1.43017461    | 7.00631794     | 9.50422136     | 10.4156415     | 2.204E-05 | 1.928153  | up        | PREDICTED: homeobox-leucine zipper protein ATHB-15-like [Sesamum indicum]                                    |
| c44188.graph_c0 | 54.9997636    | 56.3748336    | 57.1204704    | 30.9280567     | 29.278938      | 25.9206697     | 3.365E-44 | -1.983868 | down      | PREDICTED: uncharacterized protein LOC105157865 [Sesamum indicum]                                            |
| c44190.graph_c0 | 0.14990815    | 0.18006991    | 0.07705516    | 2.43065089     | 2.7505467      | 2.50685696     | 5.892E-09 | 3.22705   | up        | PREDICTED: DNA replication complex GINS protein PSF1 isoform X2 [Sesamum indicum]                            |
| c44197.graph_c0 | 1.67694022    | 2.01434331    | 1.58028536    | 23.01911       | 25.6679915     | 25.3622685     | 5.763E-45 | 2.794129  | up        | PREDICTED: 5'-methylthioadenosine/S-adenosylhomocysteine nucleosidase 1-like isoform X3 [Populus euphratica] |
| c44204.graph_c0 | 14.0562408    | 14.1952004    | 16.0855343    | 8.35206102     | 7.38685897     | 6.51118445     | 3.448E-25 | -2.010139 | down      | PREDICTED: uncharacterized protein At2g39910 [Sesamum indicum]                                               |
| c44207.graph_c0 | 35.3215556    | 37.9991985    | 35.5103109    | 14.1956313     | 18.5969221     | 18.5951634     | 4.344E-49 | -2.104773 | down      | PREDICTED: stress response protein NST1-like [Sesamum indicum]                                               |
| c44208.graph_c1 | 11.0236324    | 11.9504113    | 12.1085297    | 1.22205389     | 1.38390191     | 1.38734205     | 1.624E-53 | -4.155603 | down      | PREDICTED: uncharacterized protein LOC105160931 [Sesamum indicum]                                            |
| c44209.graph_c0 | 43.2573315    | 43.8281678    | 43.0590596    | 6.99929464     | 8.61500403     | 7.77591295     | 2.04E-103 | -3.49664  | down      | PREDICTED: probable RNA methyltransferase At5g51130 [Sesamum indicum]                                        |
| c44211.graph_c1 | 0.99313384    | 0.76021577    | 0.90085857    | 6.37766772     | 8.09623559     | 10.128459      | 7.98E-11  | 2.189146  | up        | PREDICTED: glucose-6-phosphate 1-dehydrogenase 4, chloroplastic [Sesamum indicum]                            |
| c44213.graph_c0 | 4.06784255    | 1.9434144     | 1.90085045    | 0              | 0              | 0              | 1.181E-09 | -Inf      | down      | PREDICTED: small heat shock protein, chloroplastic-like isoform X2 [Phoenix dactylifera]                     |
| c44215.graph_c0 | 157.672713    | 160.102614    | 147.915422    | 18.1851503     | 16.0692659     | 13.4511546     | 1.14E-154 | -4.299954 | down      | PREDICTED: PAX3- and PAX7-binding protein 1 [Sesamum indicum]                                                |
| c44217.graph_c0 | 7.82077464    | 9.10812006    | 8.04000404    | 6.05840433     | 7.2224647      | 6.47990772     | 2.382E-16 | -1.35715  | down      | hypothetical protein MIMGU_mgv1a015770mg [Erythranthe guttata]                                               |

| #ID             | 0 h-1<br>FPKM | 0 h-2<br>FPKM | 0 h-3<br>FPKM | 48 h-1<br>FPKM | 48 h-2<br>FPKM | 48 h-3<br>FPKM | FDR       | log2FC    | regulated | nr_annotation                                                                           |
|-----------------|---------------|---------------|---------------|----------------|----------------|----------------|-----------|-----------|-----------|-----------------------------------------------------------------------------------------|
| c44221.graph_c0 | 4.67099423    | 4.72173726    | 3.81434096    | 28.5115124     | 26.9033303     | 27.4253289     | 4.35E-23  | 1.634763  | up        | PREDICTED: kinesin-like protein KCA2 [Sesamum indicum]                                  |
| c44223.graph_c0 | 11.8722385    | 12.1755631    | 9.43645589    | 185.102701     | 176.487637     | 180.958802     | 7.393E-93 | 3.004011  | up        | PREDICTED: 14-3-3 protein / isoform A1 [Sesamum indicum]                                |
| c44226.graph_c1 | 5.4613548     | 5.94219947    | 4.71260841    | 22.0212984     | 27.1397967     | 28.3102586     | 1.731E-13 | 1.24541   | up        | PREDICTED: uncharacterized protein LOC105161158 [Sesamum indicum]                       |
| c44227.graph_c0 | 2.21307737    | 3.40814374    | 3.28141389    | 17.5130374     | 16.7253366     | 14.3270525     | 4.208E-07 | 1.429934  | up        | PREDICTED: E3 SUMO-protein ligase MMS21 [Sesamum indicum]                               |
| c44229.graph_c0 | 1.1655477     | 1.27783052    | 1.2838071     | 7.41418535     | 8.8294631      | 9.46342268     | 5.283E-06 | 1.76412   | up        | PREDICTED: uncharacterized protein LOC105172855 [Sesamum indicum]                       |
| c44232.graph_c0 | 68.9403254    | 69.4893841    | 64.7633131    | 20.8692368     | 21.2838172     | 18.4195688     | 4.73E-81  | -2.762119 | down      | PREDICTED: WEB family protein At5g55860-like [Sesamum indicum]                          |
| c44236.graph_c0 | 3.04913507    | 2.93010079    | 3.13460743    | 35.5439992     | 42.0985092     | 39.158623      | 1.219E-44 | 2.659294  | up        | PREDICTED: actin-depolymerizing factor 5-like [Sesamum indicum]                         |
| c44237.graph_c0 | 14.864105     | 15.6144525    | 13.8354887    | 8.20064954     | 7.86020392     | 7.18106502     | 7.2E-31   | -1.945958 | down      | PREDICTED: serine/threonine-protein kinase UCNL-like [Sesamum indicum]                  |
| c44238.graph_c0 | 3.02738353    | 2.37612085    | 1.85673776    | 80.7548982     | 70.4075343     | 62.7746177     | 2.07E-36  | 3.871502  | up        | hypothetical protein MIMGU_mgv1a008109mg [Erythranthe guttata]                          |
| c44239.graph_c0 | 0             | 0             | 0             | 10.7787905     | 23.5255238     | 15.9463205     | 2.848E-12 | Inf       | up        | ribosomal protein L41 [Cryptococcus gattii R265]                                        |
| c44241.graph_c0 | 4.34738849    | 1.90076076    | 2.37589603    | 0              | 0              | 0              | 5.177E-12 | -Inf      | down      | DNAJ [Theobroma cacao]                                                                  |
| c44242.graph_c0 | 5.65740275    | 7.69823276    | 6.9292059     | 31.9233065     | 36.1482335     | 37.2455495     | 2.914E-14 | 1.355388  | up        | PREDICTED: 50S ribosomal protein L4, chloroplastic [Sesamum indicum]                    |
| c44253.graph_c0 | 7.45631982    | 8.03393653    | 7.41913735    | 4.34098321     | 6.82231452     | 6.81257375     | 3.647E-12 | -1.374989 | down      | PREDICTED: probable fructokinase-4 [Solanum lycopersicum]                               |
| c44256.graph_c0 | 68.1445947    | 61.3118152    | 62.0497487    | 31.4275787     | 26.5920766     | 21.3445562     | 5.184E-58 | -2.282538 | down      | hypothetical protein MIMGU_mgv1a026885mg [Erythranthe guttata]                          |
| c44260.graph_c0 | 11.134091     | 11.3516334    | 10.3612637    | 45.4986928     | 47.6284257     | 47.4942978     | 1.179E-14 | 1.080559  | up        | PREDICTED: tripeptidyl-peptidase 2 isoform X4 [Sesamum indicum]                         |
| c44261.graph_c0 | 29.4386291    | 31.2518912    | 29.3799264    | 20.5211753     | 22.4179755     | 19.4574494     | 5.129E-28 | -1.547409 | down      | PREDICTED: phosphatidylinositol:ceramide inositolphosphotransferase 1 [Sesamum indicum] |
| c44263.graph_c0 | 18.5141564    | 19.5845513    | 17.1255386    | 16.7721744     | 17.629717      | 17.2686523     | 1.357E-15 | -1.113126 | down      | PREDICTED: calpain-type cysteine protease DEK1 [Sesamum indicum]                        |
| c44264.graph_c0 | 1.39285728    | 1.32940308    | 1.1238761     | 0.71619961     | 0.34774971     | 0.31863505     | 1.405E-07 | -2.475438 | down      | -                                                                                       |
| c44265.graph_c0 | 0             | 0             | 0             | 12.2833313     | 8.8975727      | 10.742803      | 2.81E-18  | Inf       | up        | Cold shock, Cspa, partial [Metarrhizium brunneum AKSEF 27071]                           |
| c44266.graph_c0 | 81.9136492    | 82.7533336    | 85.7732698    | 28.641271      | 25.7728768     | 27.5300516     | 6.07E-73  | -2.628095 | down      | PREDICTED: interferon-related developmental regulator 1 [Sesamum indicum]               |
| c44271.graph_c0 | 7.30424283    | 7.47915709    | 6.13198567    | 49.7455412     | 51.6576373     | 56.1526073     | 3.078E-38 | 1.896378  | up        | PREDICTED: DNA-directed RNA polymerases IV and V subunit 2-like [Sesamum indicum]       |
| c44280.graph_c0 | 28.2803148    | 27.3034849    | 26.2999512    | 24.3717035     | 26.7454215     | 21.25178       | 1.235E-17 | -1.195109 | down      | PREDICTED: uncharacterized protein LOC105178865 isoform X2 [Sesamum indicum]            |

| #ID             | 0 h-1<br>FPKM | 0 h-2<br>FPKM | 0 h-3<br>FPKM | 48 h-1<br>FPKM | 48 h-2<br>FPKM | 48 h-3<br>FPKM | FDR       | log2FC    | regulated | nr_annotation                                                                                                     |
|-----------------|---------------|---------------|---------------|----------------|----------------|----------------|-----------|-----------|-----------|-------------------------------------------------------------------------------------------------------------------|
| c44287.graph_c0 | 0.93233776    | 0.93327136    | 0.98025622    | 0.42946518     | 0.20680286     | 0.31265635     | 7.353E-07 | -2.591445 | down      | -                                                                                                                 |
| c44291.graph_c0 | 0.11461364    | 0.34418522    | 0.1104623     | 3.53725028     | 5.08959979     | 5.73113032     | 4.981E-15 | 3.636797  | up        | PREDICTED: ABC transporter G family member 21 [Sesamum indicum]                                                   |
| c44292.graph_c0 | 10.4866312    | 13.452207     | 13.4191156    | 10.3916302     | 12.169743      | 8.95745973     | 4.746E-09 | -1.265175 | down      | hypothetical protein MIMGU_mgv1a008797mg [Erythranthe guttata]                                                    |
| c44293.graph_c0 | 1.66438254    | 1.41251995    | 0.92991194    | 0.06666686     | 0.24718909     | 0.17795931     | 6.611E-14 | -4.056595 | down      | -                                                                                                                 |
| c44295.graph_c0 | 0             | 0.11657946    | 0             | 3.86255385     | 9.88877632     | 7.92391129     | 1.082E-07 | 6.518729  | up        | hypothetical protein MIMGU_mgv1a006801mg [Erythranthe guttata]                                                    |
| c44295.graph_c1 | 25.5056696    | 26.2643476    | 22.3403783    | 21.118144      | 20.9425047     | 21.3397734     | 3.837E-19 | -1.241061 | down      | PREDICTED: E3 ubiquitin-protein ligase KEG [Sesamum indicum]                                                      |
| c44295.graph_c2 | 0.0675832     | 0.06765088    | 0             | 3.73572332     | 8.37680545     | 7.92225755     | 7.654E-10 | 6.196966  | up        | PREDICTED: spermidine hydroxycinnamoyl transferase-like [Sesamum indicum]                                         |
| c44297.graph_c0 | 19.1119704    | 17.7689248    | 18.3031484    | 8.85931583     | 7.64405992     | 6.12293267     | 1.428E-43 | -2.298782 | down      | PREDICTED: BTB/POZ domain-containing protein At5g48130 [Sesamum indicum]                                          |
| c44298.graph_c0 | 3.24298538    | 3.29541809    | 2.74667213    | 33.6563261     | 20.8605736     | 17.9240114     | 0.001037  | 1.959408  | up        | PREDICTED: uncharacterized protein LOC105160865 [Sesamum indicum]                                                 |
| c44299.graph_c0 | 4.37925802    | 4.64591243    | 5.14653533    | 1.94826397     | 2.00915432     | 2.31651848     | 1.976E-21 | -2.196247 | down      | PREDICTED: DNA polymerase alpha subunit B isoform X1 [Sesamum indicum]                                            |
| c44300.graph_c0 | 69.6511896    | 71.7715504    | 68.7737061    | 73.0531204     | 67.5192067     | 67.2062856     | 1.761E-13 | -1.032266 | down      | PREDICTED: peptidyl-prolyl cis-trans isomerase FKBP17-2, chloroplastic-like isoform X1 [Nicotiana glauca]         |
| c44301.graph_c1 | 16.115923     | 14.9000178    | 15.4209903    | 16.7959348     | 13.1384804     | 13.0531595     | 6.801E-11 | -1.123591 | down      | PREDICTED: E3 ubiquitin-protein ligase At1g63170-like [Sesamum indicum]                                           |
| c44303.graph_c0 | 5251.31481    | 5319.33153    | 4740.25765    | 189.636404     | 165.788394     | 151.904828     | 1.806E-84 | -5.92839  | down      | hypothetical protein MIMGU_mgv1a024110mg [Erythranthe guttata]                                                    |
| c44308.graph_c0 | 0.04586178    | 0             | 0             | 2.15479393     | 1.70086725     | 1.76694444     | 5.837E-11 | 5.946115  | up        | PREDICTED: probable leucine-rich repeat receptor-like serine/threonine-protein kinase At3g14840 [Sesamum indicum] |
| c44309.graph_c0 | 3.24948701    | 1.87032601    | 1.77468077    | 0              | 0              | 0              | 3.104E-14 | -Inf      | down      | PREDICTED: probable rRNA-processing protein EBP2 homolog [Phoenix dactylifera]                                    |
| c44310.graph_c0 | 10.6305019    | 9.8791881     | 9.30945673    | 36.3689918     | 44.6510902     | 50.9081872     | 6.623E-10 | 1.124423  | up        | PREDICTED: glutamyl-tRNA(Gln) amidotransferase subunit B, chloroplastic/mitochondrial [Sesamum indicum]           |
| c44315.graph_c0 | 46.691315     | 50.6506636    | 45.0560884    | 34.8505971     | 33.3507355     | 29.5029792     | 1.073E-28 | -1.558339 | down      | PREDICTED: exocyst complex component EXO70B1 [Sesamum indicum]                                                    |
| c44315.graph_c1 | 32.2840125    | 30.3414526    | 27.2733577    | 16.7437222     | 21.5305957     | 22.2496787     | 1.615E-27 | -1.59152  | down      | PREDICTED: translation initiation factor eIF-2B subunit beta [Sesamum indicum]                                    |
| c44315.graph_c2 | 8.2984365     | 11.2543012    | 6.36389225    | 7.3984461      | 7.18461016     | 5.15675607     | 0.0001998 | -1.403383 | down      | PREDICTED: exocyst complex component EXO70B1 [Sesamum indicum]                                                    |

| #ID             | 0 h-1<br>FPKM | 0 h-2<br>FPKM | 0 h-3<br>FPKM | 48 h-1<br>FPKM | 48 h-2<br>FPKM | 48 h-3<br>FPKM | FDR       | log2FC    | regulated | nr_annotation                                                                                 |
|-----------------|---------------|---------------|---------------|----------------|----------------|----------------|-----------|-----------|-----------|-----------------------------------------------------------------------------------------------|
| c44316.graph_c0 | 0.38917012    | 0.35414529    | 0.18185419    | 3.45491485     | 3.69459226     | 3.39317932     | 4.507E-07 | 2.499234  | up        | PREDICTED: uncharacterized protein LOC105169064 [Sesamum indicum]                             |
| c44319.graph_c0 | 53.2209163    | 51.8539499    | 50.493235     | 20.8073188     | 18.8494467     | 15.5946759     | 1.008E-67 | -2.506973 | down      | PREDICTED: F-box-like/WD repeat-containing protein TBL1XR1 [Sesamum indicum]                  |
| c44321.graph_c0 | 8.45361575    | 4.47281412    | 5.27642645    | 0              | 0              | 0              | 2.321E-22 | -Inf      | down      | --                                                                                            |
| c44329.graph_c0 | 0.67141641    | 1.23805819    | 1.40772088    | 0.0651108      | 0.0344885      | 0.0289676      | 1.956E-10 | -5.697279 | down      | hypothetical protein MIMGU_mgv1a000906mg [Erythranthe guttata]                                |
| c44339.graph_c0 | 38.1048276    | 36.0641561    | 34.8730585    | 33.9868069     | 32.6116495     | 28.3667193     | 3.431E-18 | -1.214191 | down      | PREDICTED: angio-associated migratory cell protein [Sesamum indicum]                          |
| c44340.graph_c1 | 1.77957386    | 1.00403692    | 1.33051512    | 0.80482558     | 0.63156675     | 0.82222214     | 3.567E-05 | -1.878679 | down      | PREDICTED: mediator of RNA polymerase II transcription subunit 25-like [Sesamum indicum]      |
| c44347.graph_c0 | 16.3022131    | 17.386762     | 16.2575705    | 10.8791514     | 9.09951737     | 9.31187231     | 1.004E-34 | -1.783717 | down      | hypothetical protein MIMGU_mgv1a000491mg [Erythranthe guttata]                                |
| c44349.graph_c0 | 13.9799296    | 14.1407179    | 13.7562347    | 87.4526263     | 99.1334975     | 100.413976     | 6.132E-32 | 1.757156  | up        | PREDICTED: proteasome subunit alpha type-6-like [Sesamum indicum]                             |
| c44353.graph_c0 | 19.6075407    | 18.6032991    | 18.2902729    | 6.32470662     | 8.52760332     | 7.73096247     | 6.254E-55 | -2.344746 | down      | PREDICTED: uncharacterized TPR repeat-containing protein At1g05150-like [Sesamum indicum]     |
| c44355.graph_c0 | 0.31372567    | 0.45361306    | 0.5375332     | 3.72520525     | 5.51135628     | 5.91496296     | 3.325E-09 | 2.508197  | up        | PREDICTED: potassium transporter $\delta$ -like [Sesamum indicum]                             |
| c44355.graph_c1 | 0.09680832    | 0.13566737    | 0.14928304    | 7.72351996     | 7.70972335     | 8.66581645     | 2.304E-44 | 4.958549  | up        | PREDICTED: potassium transporter $\delta$ -like [Sesamum indicum]                             |
| c44358.graph_c0 | 16.7876969    | 15.2704858    | 16.1125059    | 23.0063602     | 13.3589574     | 9.9927787      | 0.0003111 | -1.058916 | down      | PREDICTED: protein HEADING DATE 3A-like [Sesamum indicum]                                     |
| c44359.graph_c0 | 2.43682481    | 3.09458982    | 2.29014032    | 14.5754993     | 17.8192391     | 21.7942047     | 9.078E-11 | 1.771451  | up        | PREDICTED: glutamate dehydrogenase A [Sesamum indicum]                                        |
| c44360.graph_c0 | 0.45240108    | 0.37737841    | 0.43601497    | 5.27923081     | 5.51911668     | 5.56274348     | 8.934E-10 | 2.673559  | up        | PREDICTED: probable WRKY transcription factor 30 [Sesamum indicum]                            |
| c44361.graph_c0 | 8.25534365    | 7.78316767    | 7.27788561    | 5.26184861     | 7.44800169     | 7.86884245     | 2.813E-06 | -1.203143 | down      | PREDICTED: pentatricopeptide repeat-containing protein At1g71490-like [Sesamum indicum]       |
| c44362.graph_c0 | 0             | 0             | 0             | 32.7907267     | 50.3187233     | 50.4161249     | 9.937E-50 | Inf       | up        | hypothetical protein MIMGU_mgv1a010045mg [Erythranthe guttata]                                |
| c44363.graph_c0 | 93.8099031    | 89.480965     | 90.4238108    | 30.2096433     | 34.2130466     | 36.5189732     | 4.006E-65 | -2.459187 | down      | PREDICTED: pentatricopeptide repeat-containing protein At2g17210 isoform X1 [Sesamum indicum] |
| c44363.graph_c1 | 19.1002982    | 20.8752897    | 19.4639706    | 8.28520448     | 9.13043021     | 8.39920138     | 1.081E-43 | -2.221737 | down      | PREDICTED: uncharacterized protein LOC105157994 [Sesamum indicum]                             |
| c44364.graph_c0 | 52.6839602    | 53.3589774    | 51.5531653    | 23.6645752     | 28.774957      | 31.4120016     | 9.119E-42 | -1.931738 | down      | PREDICTED: probable pre-mRNA-splicing factor ATP-dependent RNA helicase [Sesamum indicum]     |
| c44365.graph_c0 | 15.7639615    | 15.139469     | 15.1134416    | 10.2077722     | 12.6464195     | 13.3789686     | 4.744E-19 | -1.366356 | down      | PREDICTED: U-box domain-containing protein 62 [Sesamum indicum]                               |

| #ID             | 0 h-1<br>FPKM | 0 h-2<br>FPKM | 0 h-3<br>FPKM | 48 h-1<br>FPKM | 48 h-2<br>FPKM | 48 h-3<br>FPKM | FDR       | log2FC    | regulated | nr_annotation                                                                          |
|-----------------|---------------|---------------|---------------|----------------|----------------|----------------|-----------|-----------|-----------|----------------------------------------------------------------------------------------|
| c44366.graph_c0 | 53.6055241    | 58.5797295    | 50.5884348    | 40.9523838     | 53.723476      | 51.0287536     | 6.672E-17 | -1.18095  | down      | PREDICTED: rac-like GTP-binding protein RAC1 [Sesamum indicum]                         |
| c44373.graph_c0 | 0.43515432    | 0.91473912    | 1.00654295    | 5.97329885     | 12.5285626     | 12.6275967     | 6.246E-06 | 2.688231  | up        | PREDICTED: inositol polyphosphate multikinase alpha [Nicotiana glauca]                 |
| c44376.graph_c0 | 8.47384316    | 6.79550175    | 6.99137674    | 2.3065123      | 2.77239877     | 2.28912702     | 1.633E-18 | -2.61341  | down      | hypothetical protein F383_25407 [Gossypium arboreum]                                   |
| c44382.graph_c0 | 3.93766077    | 4.3458708     | 3.37336666    | 15.905762      | 15.9633722     | 19.7808859     | 0.0014429 | 1.130381  | up        | -                                                                                      |
| c44385.graph_c1 | 3.22203769    | 2.89056686    | 3.47641221    | 1.45617233     | 1.63163636     | 1.29569338     | 4.472E-10 | -2.148531 | down      | hypothetical protein MIMGU_mgv1a001279mg [Erythranthe guttata]                         |
| c44391.graph_c0 | 0.34419685    | 0.68908303    | 0.32167752    | 566.824573     | 583.013784     | 618.602456     | 0         | 9.335113  | up        | PREDICTED: raucaffricine-O-beta-D-glucosidase-like [Sesamum indicum]                   |
| c44394.graph_c0 | 0.63478391    | 0.37248732    | 0.50631049    | 12.9665239     | 14.0141799     | 15.8977543     | 1.99E-52  | 3.805119  | up        | PREDICTED: protein ENHANCED DISEASE RESISTANCE 2 [Sesamum indicum]                     |
| c44395.graph_c0 | 4.97552992    | 5.53050737    | 5.9230472     | 2.27783066     | 3.51535896     | 3.60320005     | 4.44E-12  | -1.832891 | down      | unnamed protein product [Coffea canephora]                                             |
| c44396.graph_c0 | 46.7776308    | 48.8594674    | 50.3395987    | 6.32102224     | 7.05883744     | 6.24934175     | 3.91E-146 | -3.913941 | down      | PREDICTED: uncharacterized protein LOC105156238 [Sesamum indicum]                      |
| c44399.graph_c0 | 18.5649475    | 18.9835745    | 17.413985     | 108.142016     | 147.78708      | 145.989048     | 2.972E-20 | 1.848095  | up        | PREDICTED: leucine-rich repeat extensin-like protein 4 [Sesamum indicum]               |
| c44400.graph_c0 | 16.26139      | 16.1547302    | 15.8775749    | 15.229983      | 16.6137948     | 15.5852862     | 1.017E-11 | -1.044436 | down      | PREDICTED: RING finger and transmembrane domain-containing protein 2 [Sesamum indicum] |
| c44401.graph_c0 | 0             | 0             | 0             | 4.47994003     | 7.49361039     | 2.41271435     | 2.561E-05 | Inf       | up        | --                                                                                     |
| c44403.graph_c0 | 6.2723033     | 6.94405611    | 5.27438915    | 5.72519727     | 5.5573721      | 5.49704695     | 1.2E-07   | -1.154647 | down      | PREDICTED: WD repeat-containing protein 82-B [Sesamum indicum]                         |
| c44407.graph_c0 | 8.46238671    | 9.03558454    | 10.0380018    | 9.43528314     | 8.55550321     | 6.93692521     | 2.964E-07 | -1.159052 | down      | PREDICTED: shikimate kinase, chloroplastic-like [Sesamum indicum]                      |
| c44409.graph_c0 | 31.0580677    | 30.7784702    | 30.3880838    | 32.0798429     | 30.5389008     | 29.7689208     | 5.17E-13  | -1.013498 | down      | PREDICTED: nuclear poly(A) polymerase 1 isoform X1 [Sesamum indicum]                   |
| c44411.graph_c0 | 0.59465044    | 0.51021077    | 0.21832839    | 4.85221541     | 5.05742525     | 4.24783545     | 2.12E-05  | 2.411156  | up        | PREDICTED: uncharacterized protein LOC105170709 [Sesamum indicum]                      |
| c44414.graph_c2 | 10.117702     | 9.80374264    | 9.41319286    | 45.5241888     | 47.7928772     | 50.4265906     | 1.735E-15 | 1.274725  | up        | PREDICTED: actin-depolymerizing factor 2-like [Tarenaya hassleriana]                   |
| c44416.graph_c1 | 17.2405838    | 15.1573859    | 16.2517359    | 109.405647     | 69.3806966     | 63.8297387     | 0.0055542 | 1.311027  | up        | PREDICTED: ATP-dependent 6-phosphofructokinase 6-like [Sesamum indicum]                |
| c44418.graph_c0 | 0             | 0             | 0             | 1.46877067     | 1.55598443     | 0.77347339     | 1.309E-08 | Inf       | up        | hypothetical protein AN2500.2 [Aspergillus nidulans FGSC 9411]                         |
| c44423.graph_c0 | 8.665834      | 7.59822953    | 6.57845331    | 48.9952286     | 43.4155957     | 47.3316789     | 8.786E-29 | 1.599689  | up        | PREDICTED: cytochrome P450 734A1 [Sesamum indicum]                                     |
| c44427.graph_c1 | 5.54168326    | 6.25538975    | 4.24246611    | 2.71561706     | 2.30149359     | 2.12637896     | 1.156E-09 | -2.177227 | down      | hypothetical protein MIMGU_mgv1a004986mg [Erythranthe guttata]                         |

| #ID             | 0 h-1<br>FPKM | 0 h-2<br>FPKM | 0 h-3<br>FPKM | 48 h-1<br>FPKM | 48 h-2<br>FPKM | 48 h-3<br>FPKM | FDR       | log2FC    | regulated | nr_annotation                                                                                                |
|-----------------|---------------|---------------|---------------|----------------|----------------|----------------|-----------|-----------|-----------|--------------------------------------------------------------------------------------------------------------|
| c44434.graph_c0 | 20.6673665    | 19.0927137    | 19.6435147    | 15.1247436     | 17.8291636     | 16.6889271     | 6.063E-19 | -1.278761 | down      | PREDICTED: COP9 signalosome complex subunit 6a [Sesamum indicum]                                             |
| c44436.graph_c0 | 23.0952057    | 24.0459195    | 22.7624878    | 17.1068178     | 16.0181515     | 14.4327112     | 3.526E-28 | -1.570681 | down      | PREDICTED: LOW QUALITY PROTEIN: U-box domain-containing protein 4-like [Sesamum indicum]                     |
| c44439.graph_c0 | 7.75157382    | 7.08877596    | 8.11643495    | 35.6621952     | 29.8875819     | 32.006573      | 4.022E-09 | 1.071981  | up        | PREDICTED: methionine aminopeptidase 1D, chloroplastic/mitochondrial isoform X2 [Sesamum indicum]            |
| c44446.graph_c0 | 1751.22491    | 1783.3599     | 1734.69118    | 314.834882     | 319.290486     | 324.265912     | 2.306E-68 | -3.476549 | down      | PREDICTED: REF/SRPP-like protein At3g05500 [Sesamum indicum]                                                 |
| c44448.graph_c1 | 1.35834615    | 1.54512083    | 1.42815975    | 6.31386705     | 5.96566557     | 8.19930299     | 0.0031559 | 1.222162  | up        | -                                                                                                            |
| c44449.graph_c0 | 1.22877053    | 1.05428654    | 0.95868998    | 5.33668251     | 8.09488148     | 6.1515281      | 6.103E-05 | 1.573558  | up        | PREDICTED: protein REVEILLE 8 [Sesamum indicum]                                                              |
| c44457.graph_c0 | 0.35205536    | 0.48456085    | 0.39585444    | 3.93257837     | 6.44240711     | 7.93629493     | 3.823E-07 | 2.865868  | up        | hypothetical protein MIMGU_mgv1a011349mg [Erythranthe guttata]                                               |
| c44460.graph_c0 | 8.76199046    | 11.8956773    | 8.32663966    | 76.1292482     | 67.9249757     | 66.449074      | 4.684E-24 | 1.847268  | up        | PREDICTED: ammonium transporter 1 member 1-like [Sesamum indicum]                                            |
| c44463.graph_c1 | 9.39043954    | 8.11804592    | 8.36468502    | 1.86784798     | 1.35388736     | 1.22463151     | 2.159E-29 | -3.550057 | down      | PREDICTED: metalloendopeptidase 1-like [Sesamum indicum]                                                     |
| c44465.graph_c0 | 4.59300877    | 4.27684462    | 3.84329179    | 34.2446507     | 34.8185931     | 29.9453277     | 3.595E-20 | 1.946272  | up        | PREDICTED: tubulin-folding cofactor B isoform X2 [Sesamum indicum]                                           |
| c44466.graph_c0 | 124.332409    | 125.271582    | 135.07417     | 1905.30318     | 2162.75583     | 2154.63349     | 4.031E-74 | 2.995134  | up        | PREDICTED: aquaporin TIP2-1-like [Solanum tuberosum]                                                         |
| c44467.graph_c0 | 0.91189746    | 0.58891006    | 0.79381649    | 16.9645883     | 18.2303065     | 18.4949781     | 5.339E-45 | 3.529467  | up        | PREDICTED: probable LRR receptor-like serine/threonine-protein kinase At1g51880 isoform X1 [Sesamum indicum] |
| c44471.graph_c0 | 7.38942699    | 6.86303479    | 6.460996      | 4.14071861     | 3.34570368     | 3.2160323      | 4.373E-14 | -1.964267 | down      | PREDICTED: probable WRKY transcription factor 31 [Sesamum indicum]                                           |
| c44480.graph_c0 | 0.55805642    | 0.71096484    | 0.45635201    | 10.1888835     | 17.5772006     | 19.795502      | 7.415E-11 | 3.760207  | up        | hypothetical protein M569_00618, partial [Genlisea aurea]                                                    |
| c44482.graph_c0 | 0.77400233    | 0.85633288    | 1.04697224    | 3.64036623     | 4.77096075     | 5.81048063     | 0.0006421 | 1.38251   | up        | PREDICTED: outer envelope protein 80, chloroplastic [Sesamum indicum]                                        |
| c44483.graph_c0 | 48.5004093    | 49.8281828    | 47.936251     | 15.9553618     | 17.3779017     | 17.7587022     | 7.186E-67 | -2.536392 | down      | PREDICTED: uncharacterized protein LOC105160446 [Sesamum indicum]                                            |
| c44492.graph_c0 | 2.40922853    | 1.99752083    | 2.18905842    | 9.19202798     | 9.38157665     | 9.11660519     | 1.015E-05 | 1.052533  | up        | PREDICTED: methionine--tRNA ligase, mitochondrial [Sesamum indicum]                                          |
| c44496.graph_c0 | 2.49586733    | 2.58921626    | 3.20728834    | 19.5236209     | 18.9999314     | 19.1203603     | 2.865E-13 | 1.777698  | up        | PREDICTED: uncharacterized protein LOC105165753 [Sesamum indicum]                                            |
| c44497.graph_c0 | 14.3968365    | 14.5867619    | 14.3948448    | 5.4560821      | 6.61664466     | 6.18027421     | 7.934E-46 | -2.269354 | down      | PREDICTED: uncharacterized protein LOC105166424 [Sesamum indicum]                                            |
| c44501.graph_c0 | 3.76538453    | 3.50231216    | 2.6548445     | 13.8142745     | 17.5126767     | 17.1539713     | 1.295E-13 | 1.270313  | up        | PREDICTED: calcium-transporting ATPase 3, endoplasmic reticulum-type [Sesamum indicum]                       |
| c44503.graph_c0 | 1.78622287    | 2.56666167    | 2.33238916    | 7.32550749     | 9.64437324     | 11.6430033     | 0.0001301 | 1.072516  | up        | unnamed protein product [Coffea canephora]                                                                   |
| c44505.graph_c0 | 4.36260543    | 3.87721983    | 2.56728892    | 22.1239226     | 23.6763666     | 24.598811      | 4.629E-15 | 1.689506  | up        | hypothetical protein CICLE_V10012334mg [Citrus clementina]                                                   |

| #ID             | 0 h-1<br>FPKM | 0 h-2<br>FPKM | 0 h-3<br>FPKM | 48 h-1<br>FPKM | 48 h-2<br>FPKM | 48 h-3<br>FPKM | FDR       | log2FC    | regulated | nr_annotation                                                                              |
|-----------------|---------------|---------------|---------------|----------------|----------------|----------------|-----------|-----------|-----------|--------------------------------------------------------------------------------------------|
| c44506.graph_c0 | 1.47243791    | 1.2452018     | 1.4027942     | 7.15673773     | 9.34084747     | 10.1139176     | 3.508E-10 | 1.668216  | up        | PREDICTED: uncharacterized protein LOC105166535 [Sesamum indicum]                          |
| c44511.graph_c0 | 0.36177906    | 0.18107066    | 0.17433766    | 1.4581633      | 2.5598668      | 2.96563414     | 8.479E-05 | 2.261222  | up        | PREDICTED: uncharacterized protein LOC105162704 [Sesamum indicum]                          |
| c44513.graph_c0 | 4.57034652    | 6.6336384     | 4.84528789    | 34.5261108     | 26.2612856     | 26.927816      | 9.508E-07 | 1.439139  | up        | PREDICTED: uncharacterized protein LOC105176019 [Sesamum indicum]                          |
| c44514.graph_c0 | 609.893772    | 607.120252    | 654.001086    | 13.3715576     | 13.3690876     | 10.8467087     | 3.99E-246 | -6.654069 | down      | PREDICTED: alcohol dehydrogenase 1 [Sesamum indicum]                                       |
| c44519.graph_c0 | 37.7609227    | 39.1440583    | 33.0639288    | 9.3384127      | 8.84989283     | 8.37563138     | 4.32E-98  | -3.063935 | down      | PREDICTED: calmodulin-binding transcription activator 4 [Sesamum indicum]                  |
| c44521.graph_c0 | 6.52005997    | 7.2927536     | 6.84854182    | 36.8759425     | 33.8365553     | 32.254281      | 3.37E-16  | 1.301747  | up        | PREDICTED: AP3-complex subunit beta-A isoform X2 [Sesamum indicum]                         |
| c44533.graph_c0 | 4.79128194    | 3.6333937     | 5.3640417     | 25.1466603     | 25.470802      | 27.0765504     | 1.421E-15 | 1.473839  | up        | unnamed protein product [Coffea canephora]                                                 |
| c44536.graph_c1 | 5.3411715     | 3.82698265    | 3.46793272    | 30.1453673     | 31.3866438     | 28.758859      | 3.351E-16 | 1.822964  | up        | uncharacterized protein LOC100499956 [Glycine max]                                         |
| c44543.graph_c0 | 10.074636     | 9.17229679    | 8.75416891    | 9.10462301     | 7.07005756     | 8.33719721     | 2.43E-07  | -1.204621 | down      | PREDICTED: probable inactive purple acid phosphatase 16 [Nelumbo nucifera]                 |
| c44545.graph_c1 | 15.7193474    | 17.1230344    | 14.7578022    | 14.2734184     | 15.5181018     | 14.5659278     | 4.374E-15 | -1.119332 | down      | hypothetical protein MIMGU_mgv1a002529mg [Erythranthe guttata]                             |
| c44547.graph_c0 | 0             | 0             | 0             | 7.00242733     | 6.61625265     | 6.06231995     | 8.983E-15 | Inf       | up        | -                                                                                          |
| c44548.graph_c0 | 127.798123    | 118.148303    | 121.648628    | 9.83216139     | 10.0334749     | 10.1078435     | 1.21E-189 | -4.633978 | down      | PREDICTED: uncharacterized protein LOC102619543 isoform X1 [Citrus sinensis]               |
| c44550.graph_c0 | 0.04855391    | 0.12960675    | 0.0831916     | 1.46121367     | 1.5163873      | 1.76452882     | 1.516E-09 | 3.161423  | up        | hypothetical protein MIMGU_mgv1a020534mg, partial [Erythranthe guttata]                    |
| c44552.graph_c0 | 31.4538671    | 33.2299891    | 29.0893669    | 28.1273012     | 28.1965266     | 27.8680999     | 4.823E-17 | -1.171817 | down      | PREDICTED: serrate RNA effector molecule-like [Sesamum indicum]                            |
| c44554.graph_c0 | 5.75338883    | 5.9495351     | 5.49917289    | 24.9250077     | 26.6370534     | 24.9844924     | 3.033E-08 | 1.136157  | up        | unnamed protein product [Coffea canephora]                                                 |
| c44555.graph_c0 | 7.06763217    | 7.67468468    | 6.57896949    | 3.65821567     | 4.24104308     | 4.68810284     | 9.977E-18 | -1.780175 | down      | PREDICTED: protein tesmin/TSO1-like CXC 5 [Sesamum indicum]                                |
| c44559.graph_c0 | 0.15133577    | 0.23805149    | 0.08334534    | 0.77677071     | 1.49808976     | 1.63044265     | 0.0006558 | 2.024207  | up        | PREDICTED: probable receptor-like protein kinase At5g24010 [Sesamum indicum]               |
| c44560.graph_c0 | 15.4539397    | 13.6193828    | 13.4414094    | 59.8830891     | 61.4815926     | 58.1832552     | 2.322E-12 | 1.06188   | up        | PREDICTED: serine/threonine-protein phosphatase PP2A-2 catalytic subunit [Sesamum indicum] |
| c44560.graph_c1 | 0.60215378    | 0.5241363     | 0.40371728    | 11.5048944     | 11.753666      | 12.1255702     | 3.274E-33 | 3.517089  | up        | PREDICTED: uncharacterized protein LOC102583109 [Solanum tuberosum]                        |
| c44563.graph_c0 | 71.2716066    | 72.9695942    | 61.399815     | 12.3703539     | 14.2456554     | 12.1288058     | 6.5E-119  | -3.425341 | down      | PREDICTED: uncharacterized protein LOC105165633 [Sesamum indicum]                          |
| c44566.graph_c0 | 82.9759821    | 81.9871424    | 73.9550815    | 38.8979291     | 40.013215      | 39.0503988     | 9.787E-47 | -2.034784 | down      | hypothetical protein MIMGU_mgv1a005930mg [Erythranthe guttata]                             |



| #ID             | 0 h-1<br>FPKM | 0 h-2<br>FPKM | 0 h-3<br>FPKM | 48 h-1<br>FPKM | 48 h-2<br>FPKM | 48 h-3<br>FPKM | FDR       | log2FC    | regulated | nr_annotation                                                                                                |
|-----------------|---------------|---------------|---------------|----------------|----------------|----------------|-----------|-----------|-----------|--------------------------------------------------------------------------------------------------------------|
| c44568.graph_c0 | 103.587954    | 104.441589    | 109.834879    | 60.8606317     | 75.2091247     | 74.5865718     | 3.681E-29 | -1.615449 | down      | PREDICTED: probable cyclic nucleotide-gated ion channel 17 [Sesamum indicum]                                 |
| c44568.graph_c1 | 15.5801375    | 10.1466252    | 10.1311558    | 2.24812899     | 2.56482161     | 2.92362011     | 1.358E-12 | -3.230184 | down      | -                                                                                                            |
| c44572.graph_c0 | 5.6724729     | 3.15452946    | 3.41326812    | 0              | 0              | 0              | 2.841E-24 | -Inf      | down      | --                                                                                                           |
| c44573.graph_c0 | 0.1523414     | 0.03812349    | 0             | 1.15786138     | 0.89208272     | 1.90441648     | 0.0001785 | 3.375762  | up        | PREDICTED: cell division control protein 6 homolog [Sesamum indicum]                                         |
| c44575.graph_c0 | 7.21038567    | 7.62614951    | 6.55587103    | 0.90866816     | 0.96262373     | 1.39401287     | 4.818E-39 | -3.732036 | down      | unknown protein [Arabidopsis thaliana]                                                                       |
| c44576.graph_c0 | 1.81151411    | 2.00565074    | 2.0104309     | 8.44556932     | 9.85783483     | 11.5872175     | 9.034E-08 | 1.336472  | up        | PREDICTED: phosphoinositide phosphatase SAC6 [Sesamum indicum]                                               |
| c44583.graph_c0 | 2.41395468    | 1.89519364    | 2.00719416    | 0              | 0              | 0.03880012     | 1.883E-24 | -8.386615 | down      | actin [Dendrobium catenatum]                                                                                 |
| c44585.graph_c0 | 0.95387859    | 0.65102302    | 1.50435625    | 8.34836417     | 7.78617529     | 7.00181758     | 2.159E-07 | 1.873383  | up        | PREDICTED: methyltransferase-like protein 6 isoform X3 [Sesamum indicum]                                     |
| c44591.graph_c0 | 56.0964009    | 60.1213003    | 52.3803175    | 28.1943958     | 25.2315641     | 23.7979257     | 4.871E-51 | -2.140218 | down      | PREDICTED: uncharacterized protein LOC105165989 [Sesamum indicum]                                            |
| c44592.graph_c0 | 38.7344985    | 39.1203607    | 40.2913114    | 29.2961729     | 30.4556355     | 31.2648288     | 4.321E-20 | -1.395127 | down      | PREDICTED: E3 ubiquitin-protein ligase RNF185-like [Sesamum indicum]                                         |
| c44594.graph_c0 | 154.948309    | 150.189297    | 159.134055    | 118.495379     | 97.173109      | 79.4546345     | 1.312E-29 | -1.665888 | down      | PREDICTED: uncharacterized protein LOC105169586 [Sesamum indicum]                                            |
| c44595.graph_c0 | 0.15148391    | 0.1010904     | 0.12977522    | 7.67562746     | 7.34289751     | 8.52681087     | 2.278E-19 | 4.926971  | up        | PREDICTED: putative 4-hydroxy-tetrahydrodipicolinate reductase 3, chloroplastic isoform X2 [Sesamum indicum] |
| c44602.graph_c0 | 30.5111821    | 30.7493927    | 28.2782103    | 15.3187576     | 17.7857909     | 15.4095722     | 2.912E-41 | -1.902494 | down      | PREDICTED: uncharacterized protein At1g51745 [Sesamum indicum]                                               |
| c44606.graph_c0 | 0             | 0             | 0.06420405    | 5.3853812      | 6.97297134     | 5.28335466     | 8.587E-20 | 7.049254  | up        | --                                                                                                           |
| c44609.graph_c0 | 21.8897191    | 20.2400288    | 20.8213751    | 12.2244818     | 15.4170907     | 13.9110669     | 4.047E-21 | -1.620088 | down      | PREDICTED: extra-large guanine nucleotide-binding protein 3-like [Sesamum indicum]                           |
| c44609.graph_c1 | 38.9641467    | 34.7739047    | 39.2118148    | 29.4090278     | 27.3067032     | 27.1685164     | 4.873E-16 | -1.445632 | down      | Extra-large GTP-binding protein 3 isoform 2 [1 neoroma 20001]                                                |
| c44609.graph_c2 | 47.058659     | 50.3437491    | 47.0909062    | 32.0456707     | 31.4834519     | 33.8899415     | 1.645E-27 | -1.586122 | down      | PREDICTED: extra-large guanine nucleotide-binding protein 3 [Sesamum indicum]                                |
| c44615.graph_c0 | 10.7782511    | 12.0866952    | 10.2569701    | 6.39795614     | 5.47650986     | 5.85985355     | 6.76E-32  | -1.91516  | down      | PREDICTED: pentatricopeptide repeat-containing protein At3g22470, mitochondrial-like [Sesamum indicum]       |
| c44618.graph_c0 | 6.91108868    | 8.01032632    | 8.22663144    | 4.18878005     | 5.57350571     | 5.09874297     | 3.458E-12 | -1.662768 | down      | PREDICTED: transcription initiation factor TFIID subunit 8-like [Sesamum indicum]                            |
| c44618.graph_c1 | 0.89725626    | 0.73485387    | 0.8385526     | 3.40663924     | 5.65220746     | 6.79792771     | 0.0002091 | 1.654769  | up        | hypothetical protein MIMGU_mgv1a005181mg [Erythranthe guttata]                                               |
| c44622.graph_c0 | 446.771074    | 481.905289    | 406.651674    | 32.3842536     | 22.1126911     | 15.1929085     | 5.46E-207 | -5.265372 | down      | PREDICTED: telomere repeat-binding protein 2-like [Sesamum indicum]                                          |

| #ID             | 0 h-1<br>FPKM | 0 h-2<br>FPKM | 0 h-3<br>FPKM | 48 h-1<br>FPKM | 48 h-2<br>FPKM | 48 h-3<br>FPKM | FDR       | log2FC    | regulated | nr_annotation                                                                           |
|-----------------|---------------|---------------|---------------|----------------|----------------|----------------|-----------|-----------|-----------|-----------------------------------------------------------------------------------------|
| c44624.graph_c0 | 0             | 0             | 0             | 4.17734956     | 6.13845159     | 2.63785715     | 1.037E-06 | Inf       | up        | hypothetical protein SELMODRAFT_29765, partial [Selaginella moellendorffii]             |
| c44627.graph_c0 | 7.23527912    | 6.6917173     | 7.34181007    | 3.7426651      | 4.47907995     | 4.38588419     | 1.533E-27 | -1.775549 | down      | PREDICTED: uncharacterized protein LOC105176363 [Sesamum indicum]                       |
| c44631.graph_c0 | 4.01527079    | 5.80103925    | 5.37255645    | 2.78388085     | 4.03997836     | 3.83438479     | 5.285E-07 | -1.536444 | down      | PREDICTED: WD repeat-containing protein 48-like [Sesamum indicum]                       |
| c44635.graph_c0 | 17.0762981    | 18.2978102    | 15.9671777    | 1.59876012     | 2.16792638     | 2.97790721     | 5.34E-110 | -3.952473 | down      | PREDICTED: uncharacterized protein LOC105175356 [Sesamum indicum]                       |
| c44641.graph_c0 | 20.7809077    | 21.1100979    | 22.0616297    | 9.90778357     | 9.1840834      | 10.2163265     | 1.285E-41 | -2.143093 | down      | PREDICTED: chloroplast envelope membrane protein [Sesamum indicum]                      |
| c44642.graph_c0 | 23.2092946    | 10.7227086    | 13.4375754    | 0              | 0              | 0              | 8.828E-14 | -Inf      | down      | -                                                                                       |
| c44646.graph_c0 | 1.84479263    | 1.49821729    | 2.72846275    | 8.40151593     | 9.61377722     | 10.813967      | 5.987E-06 | 1.221152  | up        | PREDICTED: GDP-mannose transporter GONST4 [Sesamum indicum]                             |
| c44646.graph_c1 | 3.70834971    | 3.87345711    | 3.35648237    | 1.15859627     | 1.66799462     | 1.82392123     | 1.533E-11 | -2.257283 | down      | PREDICTED: non-specific lipid-transfer protein-like protein At2g13820 [Sesamum indicum] |
| c44646.graph_c3 | 82.7252259    | 84.897333     | 78.015323     | 45.3242421     | 50.6184012     | 47.6754057     | 3.468E-34 | -1.792647 | down      | PREDICTED: heat shock 70 kDa protein, mitochondrial [Sesamum indicum]                   |
| c44650.graph_c1 | 1.93105057    | 1.76729987    | 2.05608048    | 0.45745965     | 0.43077602     | 0.31659043     | 3.111E-10 | -3.270814 | down      | hypothetical protein MIMGU_mgv1a004154mg [Erythranthe guttata]                          |
| c44656.graph_c0 | 73.4399385    | 72.7223295    | 71.4604       | 30.6687549     | 29.7129187     | 23.5311465     | 9.692E-63 | -2.389643 | down      | PREDICTED: MLO-like protein 10 isoform X1 [Sesamum indicum]                             |
| c44658.graph_c0 | 62.4680854    | 67.0787825    | 61.4205088    | 44.9453372     | 39.4885177     | 34.0411345     | 1.03E-33  | -1.701949 | down      | PREDICTED: serine/threonine-protein kinase CDL1 [Sesamum indicum]                       |
| c44658.graph_c1 | 0.04040068    | 0.08088227    | 0.05191647    | 12.840811      | 10.8037661     | 11.3263227     | 8.785E-71 | 6.643745  | up        | PREDICTED: protein LONGIFOLIA 1 [Sesamum indicum]                                       |
| c44661.graph_c0 | 4.29673155    | 2.88213624    | 2.56150677    | 0.12242565     | 0.43231711     | 0.29048962     | 8.187E-16 | -4.557356 | down      | hypothetical protein MIMGU_mgv1a0244072mg, partial [Erythranthe guttata]                |
| c44662.graph_c0 | 0.32044688    | 0.48115163    | 0.51473365    | 1.77129938     | 3.9093269      | 3.80888788     | 0.0018088 | 1.816055  | up        | PREDICTED: transcription factor JUNGBRUNNEN 1 [Sesamum indicum]                         |
| c44663.graph_c0 | 46.4128499    | 47.6857362    | 43.0184339    | 26.6908928     | 26.5524903     | 23.3358492     | 4.455E-38 | -1.855793 | down      | hypothetical protein MIMGU_mgv1a008429mg [Erythranthe guttata]                          |
| c44666.graph_c0 | 14.6297915    | 14.0954958    | 12.7302567    | 76.3042475     | 84.5643548     | 82.2078381     | 1.02E-27  | 1.533959  | up        | PREDICTED: coatomer subunit beta'-2-like isoform X1 [Sesamum indicum]                   |
| c44667.graph_c0 | 0.74276073    | 0.94627844    | 0.73755036    | 0.55986515     | 0.88966386     | 0.52584046     | 0.0062711 | -1.318615 | down      | PREDICTED: endoglucanase 24-like [Sesamum indicum]                                      |
| c44669.graph_c0 | 33.7555244    | 34.0504796    | 30.1731907    | 24.2570164     | 24.1304549     | 22.0772781     | 1.672E-26 | -1.49097  | down      | unnamed protein product [Coffea canephora]                                              |
| c44676.graph_c1 | 2.62481372    | 2.35183626    | 2.57102001    | 14.4919875     | 16.7139857     | 15.7988652     | 1.475E-19 | 1.618804  | up        | PREDICTED: zinc-metalloproteinase, peroxisomal isoform X1 [Sesamum indicum]             |

| #ID             | 0 h-1<br>FPKM | 0 h-2<br>FPKM | 0 h-3<br>FPKM | 48 h-1<br>FPKM | 48 h-2<br>FPKM | 48 h-3<br>FPKM | FDR       | log2FC    | regulated | nr_annotation                                                                         |
|-----------------|---------------|---------------|---------------|----------------|----------------|----------------|-----------|-----------|-----------|---------------------------------------------------------------------------------------|
| c44677.graph_c0 | 50.9852301    | 53.3101779    | 51.7333033    | 12.2077885     | 11.454652      | 9.20719136     | 8.723E-60 | -3.261459 | down      | PREDICTED: protein ABSCISIC ACID-INSENSITIVE 5 isoform X2 [Nicotiana tomentosiformis] |
| c44677.graph_c1 | 0.06156367    | 0             | 0             | 1.13432942     | 1.56218982     | 1.11025145     | 5.936E-09 | 4.950454  | up        | -                                                                                     |
| c44677.graph_c2 | 116.144763    | 116.617148    | 120.451878    | 58.6616342     | 60.799573      | 69.1825895     | 5.041E-41 | -1.92437  | down      | PREDICTED: putative peptidyl-tRNA hydrolase PTRHD1 [Sesamum indicum]                  |
| c44677.graph_c3 | 42.1865402    | 43.3901115    | 40.5513753    | 33.9484173     | 33.1335168     | 33.6902458     | 3.057E-21 | -1.340327 | down      | PREDICTED: DEAD-box ATP-dependent RNA helicase 37-like [Sesamum indicum]              |
| c44677.graph_c4 | 14.6817979    | 11.8388469    | 14.3746222    | 9.92967671     | 9.78009519     | 11.7008909     | 2.793E-10 | -1.399803 | down      | PREDICTED: purple acid phosphatase 17-like [Sesamum indicum]                          |
| c44681.graph_c0 | 66.765262     | 68.2191021    | 64.4953827    | 28.3667244     | 23.3897766     | 22.9688921     | 3.978E-61 | -2.429525 | down      | PREDICTED: tubby-like G-box protein $\delta$ [Sesamum indicum]                        |
| c44681.graph_c1 | 39.3070642    | 51.1637803    | 41.8914863    | 17.5499551     | 14.009502      | 15.2859323     | 2.321E-27 | -2.511764 | down      | unknown [Lotus japonicus]                                                             |
| c44683.graph_c0 | 640.030326    | 738.274837    | 640.229928    | 663.573751     | 498.872648     | 389.501078     | 1.426E-13 | -1.388282 | down      | PREDICTED: protein FAR1-RELATED SEQUENCE 5 [Sesamum indicum]                          |
| c44684.graph_c0 | 0             | 0             | 0             | 5.19362618     | 4.15246579     | 3.74932199     | 2.986E-12 | Inf       | up        | -                                                                                     |
| c44688.graph_c0 | 1.99229932    | 2.58719261    | 2.07582446    | 13.5921482     | 18.0778691     | 18.362015      | 1.642E-19 | 1.888128  | up        | hypothetical protein MIMGU_mgv1a002066mg [Erythranthe guttata]                        |
| c44689.graph_c0 | 3.59108013    | 3.85770113    | 4.61468014    | 19.6886411     | 30.431767      | 36.4018405     | 6.899E-06 | 1.813629  | up        | PREDICTED: uncharacterized protein LOC105180344 [Sesamum indicum]                     |
| c44691.graph_c0 | 1.36869887    | 1.41900047    | 1.75883224    | 0.04503338     | 0              | 0.08014086     | 4.472E-18 | -6.19683  | down      | PREDICTED: uncharacterized protein LOC103492548 [Cucumis melo]                        |
| c44691.graph_c1 | 24.9304715    | 24.5824096    | 20.4000147    | 94.5824708     | 94.415869      | 100.318647     | 5.736E-13 | 1.033234  | up        | hypothetical protein MIMGU_mgv1a007945mg [Erythranthe guttata]                        |
| c44694.graph_c0 | 3.84319686    | 2.42221367    | 1.64622004    | 33.4390342     | 29.4510417     | 28.1203067     | 2.323E-11 | 2.516491  | up        | PREDICTED: crocetin glucosyltransferase, chloroplastic-like [Sesamum indicum]         |
| c44701.graph_c0 | 0             | 0             | 0             | 5.28681251     | 4.45031518     | 4.65331805     | 8.538E-26 | Inf       | up        | hypothetical protein MIMGU_mgv1a021943mg [Erythranthe guttata]                        |
| c44702.graph_c0 | 8.86931675    | 9.59035295    | 9.99560107    | 81.6662358     | 66.1480004     | 54.0427579     | 2.758E-07 | 1.814009  | up        | PREDICTED: hydroxymethylglutaryl-CoA synthase isoform X1 [Sesamum indicum]            |
| c44705.graph_c0 | 2.01307151    | 1.88366856    | 1.68709343    | 23.0208926     | 26.39525       | 25.4702885     | 1.992E-30 | 2.727271  | up        | PREDICTED: pyruvate kinase isoform $\Delta 1$ [Sesamum indicum]                       |
| c44710.graph_c0 | 14.711464     | 14.7817658    | 15.908579     | 1.32974402     | 3.35921376     | 3.27654894     | 6.294E-46 | -3.543836 | down      | PREDICTED: uncharacterized protein LOC100244117 [Vitis vinifera]                      |
| c44710.graph_c1 | 13.4005448    | 13.3491617    | 12.7279965    | 10.3773398     | 7.32902211     | 4.88218331     | 6.112E-14 | -1.811976 | down      | PREDICTED: dehydration-responsive element-binding protein 1D-like [Sesamum indicum]   |
| c44711.graph_c0 | 32.1643932    | 32.7140464    | 31.3315253    | 10.1330642     | 13.2292515     | 11.2527684     | 1.053E-61 | -2.495731 | down      | PREDICTED: gamma-glutamyltranspeptidase 3 [Sesamum indicum]                           |
| c44713.graph_c0 | 1.23449162    | 1.06721944    | 1.00950857    | 0.98220863     | 0.98576615     | 0.80496622     | 0.0038861 | -1.270276 | down      | PREDICTED: protein ROOT PRIMORDIUM DEFECTIVE 1 [Sesamum indicum]                      |

| #ID             | 0 h-1<br>FPKM | 0 h-2<br>FPKM | 0 h-3<br>FPKM | 48 h-1<br>FPKM | 48 h-2<br>FPKM | 48 h-3<br>FPKM | FDR       | log2FC    | regulated | nr_annotation                                                                                        |
|-----------------|---------------|---------------|---------------|----------------|----------------|----------------|-----------|-----------|-----------|------------------------------------------------------------------------------------------------------|
| c44714.graph_c0 | 4.70995938    | 5.04360655    | 4.081908      | 16.8519381     | 21.7010465     | 21.1004012     | 0.0015771 | 1.088084  | up        | hypothetical protein MIMGU_mgv1a014633mg [Erythranthe guttata]                                       |
| c44715.graph_c0 | 6.48985561    | 6.67075299    | 7.16432442    | 0.3611403      | 0.9352062      | 0.85690791     | 3.458E-35 | -4.271806 | down      | PREDICTED: uncharacterized membrane protein At1g06890 isoform X2 [Sesamum indicum]                   |
| c44718.graph_c0 | 50.0988726    | 48.8268858    | 54.9693331    | 25.788369      | 30.6667594     | 28.0180837     | 1.36E-39  | -1.886563 | down      | PREDICTED: ntn3-family protein AFP3-like [Sesamum indicum]                                           |
| c44720.graph_c0 | 23.5586769    | 20.9489141    | 23.7145021    | 19.8227946     | 18.2024224     | 14.6126722     | 4.517E-18 | -1.388696 | down      | hypothetical protein MIMGU_mgv1a011515mg [Erythranthe guttata]                                       |
| c44722.graph_c0 | 7.45885883    | 8.15711004    | 7.33964044    | 3.12467846     | 4.71455282     | 5.10327153     | 9.16E-28  | -1.851491 | down      | PREDICTED: protein NRT1/ PTR FAMILY 5.5-like isoform X2 [Sesamum indicum]                            |
| c44724.graph_c0 | 73.364664     | 73.0149469    | 72.4625209    | 49.3430641     | 44.8144909     | 43.2120626     | 7.161E-33 | -1.686936 | down      | PREDICTED: cytochrome P450 / 8A3-like [Sesamum indicum]                                              |
| c44725.graph_c0 | 1.78859779    | 1.15096423    | 1.64172784    | 14.4180133     | 18.7030247     | 19.3221376     | 2.624E-14 | 2.493906  | up        | hypothetical protein MIMGU_mgv1a006677mg [Erythranthe guttata]                                       |
| c44728.graph_c0 | 67.008013     | 63.5359012    | 65.2806575    | 481.166817     | 505.597054     | 542.866308     | 1.071E-37 | 1.94672   | up        | PREDICTED: ruBisCO large subunit-binding protein subunit beta, chloroplastic [Sesamum indicum]       |
| c44735.graph_c0 | 2.99180356    | 1.68754569    | 2.13588113    | 0              | 0              | 0              | 2.046E-33 | -Inf      | down      | hypothetical protein SELMODRAFT_444263 [Selaginella moellendorffii]                                  |
| c44740.graph_c0 | 5.70418914    | 5.00137315    | 6.74155999    | 35.9416176     | 37.7100631     | 33.9943572     | 8.401E-20 | 1.605251  | up        | PREDICTED: transcription factor TGA1-like [Sesamum indicum]                                          |
| c44741.graph_c0 | 6.68674714    | 6.65646256    | 5.83926178    | 39.4801681     | 34.0725053     | 39.6717873     | 9.614E-20 | 1.546971  | up        | PREDICTED: aspartate-semialdehyde dehydrogenase [Sesamum indicum]                                    |
| c44742.graph_c0 | 10.7137706    | 11.3754077    | 11.579125     | 7.81630478     | 7.31336995     | 9.36627177     | 1.727E-15 | -1.477632 | down      | PREDICTED: probable zinc metallopeptidase EGY3, chloroplastic [Sesamum indicum]                      |
| c44743.graph_c0 | 28.4500503    | 27.1378741    | 26.1604722    | 18.1444146     | 23.58352       | 25.6097759     | 2.78E-20  | -1.30187  | down      | PREDICTED: COBRA-like protein 7 [Sesamum indicum]                                                    |
| c44744.graph_c0 | 3.37918669    | 3.28308307    | 4.34238868    | 1.46500103     | 1.64899038     | 1.91458775     | 8.305E-08 | -2.153638 | down      | PREDICTED: serine/threonine-protein kinase Nek2 [Sesamum indicum]                                    |
| c44747.graph_c0 | 2.83974747    | 2.43650661    | 2.22243776    | 230.222132     | 303.219309     | 285.834735     | 2.25E-137 | 5.751528  | up        | PREDICTED: endoplasmic homolog [Sesamum indicum]                                                     |
| c44750.graph_c0 | 10.0240111    | 10.452134     | 10.9295465    | 8.01046587     | 8.52317455     | 9.61767811     | 2.956E-10 | -1.28446  | down      | PREDICTED: transcription factor HBP-1b(c38)-like isoform X1 [Sesamum indicum]                        |
| c44753.graph_c0 | 0             | 0             | 0             | 14.1902212     | 14.7459328     | 11.6625282     | 2.678E-35 | Inf       | up        | apocytochrome b [Chara vulgaris]                                                                     |
| c44753.graph_c1 | 0             | 0             | 0             | 1.2233363      | 0.46459534     | 0.55452767     | 0.0003025 | Inf       | up        | Citrate synthase, mitochondrial [Rozella allomyces CSF55]                                            |
| c44756.graph_c0 | 0             | 0             | 0             | 8.6911927      | 13.0217031     | 12.7048238     | 3.064E-17 | Inf       | up        | -<br>PREDICTED: LOW QUALITY PROTEIN: cullin-associated NEDD8-dissociated protein 1 [Sesamum indicum] |
| c44762.graph_c1 | 2.42039588    | 2.4810604     | 3.05049099    | 31.9787145     | 33.3892246     | 36.2286521     | 4.737E-72 | 2.654019  | up        | PREDICTED: uncharacterized protein LOC105162036 [Sesamum indicum]                                    |
| c44762.graph_c4 | 165.397321    | 146.537528    | 173.860517    | 255.301118     | 132.797807     | 93.375867      | 0.0069917 | -1.014704 | down      |                                                                                                      |
| c44762.graph_c5 | 0             | 0             | 0             | 66.3309543     | 64.0468181     | 73.092621      | 3.01E-100 | Inf       | up        | unnamed protein product [Coffea canephora]                                                           |

| #ID             | 0 h-1<br>FPKM | 0 h-2<br>FPKM | 0 h-3<br>FPKM | 48 h-1<br>FPKM | 48 h-2<br>FPKM | 48 h-3<br>FPKM | FDR       | log2FC    | regulated | nr_annotation                                                                                                  |
|-----------------|---------------|---------------|---------------|----------------|----------------|----------------|-----------|-----------|-----------|----------------------------------------------------------------------------------------------------------------|
| c44762.graph_c6 | 5.31181574    | 4.9787716     | 5.58482198    | 24.9128275     | 21.7263702     | 22.879804      | 1.313E-07 | 1.114672  | up        | PREDICTED: UPF0496 protein At1g20180-like isoform X2 [Nicotiana glauca]                                        |
| c44764.graph_c0 | 2.26997505    | 1.97370454    | 2.4485832     | 8.68555274     | 9.63790652     | 9.77928624     | 6.356E-08 | 1.04925   | up        | PREDICTED: LOW QUALITY PROTEIN: protein DA1-related 1 [Sesamum indicum]                                        |
| c44767.graph_c0 | 0.9973398     | 0.51996796    | 0.77431277    | 30.1868839     | 30.1542697     | 28.1716032     | 2.5E-104  | 4.25534   | up        | PREDICTED: putative E3 ubiquitin-protein ligase XBAT31 [Sesamum indicum]                                       |
| c44770.graph_c0 | 2.96117197    | 3.02892701    | 2.76554474    | 34.5847947     | 40.3022361     | 40.3502188     | 5.747E-69 | 2.698759  | up        | PREDICTED: SNF2 domain-containing protein CLASSY 3-like [Sesamum indicum]                                      |
| c44773.graph_c0 | 12.3859457    | 12.6237729    | 13.0225341    | 8.52693559     | 8.98929687     | 9.06404638     | 6.308E-21 | -1.535835 | down      | PREDICTED: zinc finger CCCH domain-containing protein 5 [Sesamum indicum]                                      |
| c44775.graph_c1 | 15.1884356    | 15.5365711    | 14.768899     | 12.5967243     | 14.6070387     | 16.3280429     | 3.146E-10 | -1.084239 | down      | PREDICTED: uncharacterized protein LOC105172565 isoform X4 [Sesamum indicum]                                   |
| c44777.graph_c0 | 2.03512254    | 1.46984992    | 1.72140605    | 7.54701601     | 8.44770391     | 10.8542729     | 1.752E-07 | 1.340234  | up        | PREDICTED: gibberellin 2-beta-dioxygenase 8-like [Sesamum indicum]                                             |
| c44781.graph_c0 | 1.06605236    | 1.3042576     | 1.48407945    | 12.6856775     | 13.6990456     | 15.292931      | 5.127E-22 | 2.412144  | up        | PREDICTED: protein S-acyltransferase Z1 [Sesamum indicum]                                                      |
| c44781.graph_c1 | 1.50655171    | 0.94253768    | 1.20998662    | 12.664895      | 17.4603761     | 18.6789978     | 1.434E-07 | 2.71459   | up        | -                                                                                                              |
| c44785.graph_c0 | 59.8466496    | 56.3426245    | 61.1143862    | 10.1932453     | 8.88011331     | 7.9652874      | 2.17E-130 | -3.727396 | down      | PREDICTED: phytoalexin receptor Z-like [Sesamum indicum]                                                       |
| c44790.graph_c1 | 0             | 0             | 0             | 6.79210101     | 6.86403998     | 7.75326496     | 7.688E-25 | Inf       | up        | hypothetical protein SORBIDRAFT_07g024570 [Sorghum bicolor]                                                    |
| c44796.graph_c0 | 23.0028605    | 22.5559782    | 20.4730299    | 8.62265767     | 8.61922488     | 9.28383114     | 1.17E-48  | -2.332582 | down      | PREDICTED: AMP deaminase-like [Sesamum indicum]                                                                |
| c44797.graph_c0 | 0             | 0             | 0.05621366    | 4.03004607     | 3.11662196     | 4.66168399     | 1.369E-16 | 6.666283  | up        | hypothetical protein MIMGU_mgv1a000411mg [Erythranthe guttata]                                                 |
| c44797.graph_c1 | 84.3931498    | 82.4960087    | 75.5298408    | 56.3188572     | 52.8620364     | 53.6661207     | 3.232E-28 | -1.589171 | down      | PREDICTED: uncharacterized protein LOC105172555 [Sesamum indicum]                                              |
| c44799.graph_c0 | 3.94892059    | 4.2755585     | 3.59876624    | 1.91180782     | 2.55623993     | 2.9728225      | 7.107E-12 | -1.690562 | down      | PREDICTED: uncharacterized protein LOC105170906 isoform X2 [Sesamum indicum]                                   |
| c44802.graph_c0 | 77.6366872    | 74.9863793    | 74.1287236    | 2.31760872     | 2.86442964     | 2.20540224     | 3.46E-272 | -5.959172 | down      | PREDICTED: adagio protein S isoform A1 [Sesamum indicum]                                                       |
| c44803.graph_c0 | 15.1091255    | 16.79711      | 15.3847965    | 7.59705001     | 10.2406735     | 9.2526295      | 8.845E-36 | -1.825816 | down      | PREDICTED: ribosome biogenesis protein BMS1 homolog [Sesamum indicum]                                          |
| c44808.graph_c0 | 48.4658882    | 59.1769292    | 38.5318345    | 27.0843576     | 31.7073942     | 35.6253457     | 9.448E-09 | -1.648723 | down      | hypothetical protein MIMGU_mgv1a003414mg [Erythranthe guttata]                                                 |
| c44811.graph_c0 | 2.15946794    | 2.41593977    | 2.6117664     | 16.4714155     | 19.6810156     | 20.851846      | 1.866E-20 | 1.964752  | up        | PREDICTED: glucose-1-phosphate acetyltransferase large subunit 3, chloroplastic/amyloplastic [Sesamum indicum] |
| c44812.graph_c0 | 5.76585752    | 5.14920034    | 4.06788128    | 41.0021898     | 42.5173553     | 43.6813477     | 5.444E-43 | 2.070637  | up        | PREDICTED: pyrophosphate-energized membrane proton pump 3 [Sesamum indicum]                                    |
| c44815.graph_c0 | 16.7146686    | 17.0005437    | 16.929837     | 5.14664205     | 4.5338172      | 3.66111201     | 6.839E-82 | -2.937789 | down      | PREDICTED: LOW QUALITY PROTEIN: leucine-rich repeat receptor-like protein kinase PXL2 [Sesamum indicum]        |

| #ID             | 0 h-1<br>FPKM | 0 h-2<br>FPKM | 0 h-3<br>FPKM | 48 h-1<br>FPKM | 48 h-2<br>FPKM | 48 h-3<br>FPKM | FDR       | log2FC    | regulated | nr_annotation                                                                                         |
|-----------------|---------------|---------------|---------------|----------------|----------------|----------------|-----------|-----------|-----------|-------------------------------------------------------------------------------------------------------|
| c44817.graph_c0 | 9.44345537    | 8.9553899     | 8.8352874     | 6.0288968      | 6.91238833     | 7.57138086     | 3.316E-10 | -1.42905  | down      | PREDICTED: nuclear transcription factor Y subunit A-1-like isoform X2 [Sesamum indicum]               |
| c44820.graph_c0 | 71.7394847    | 67.3604614    | 60.3653355    | 35.0273308     | 39.6587071     | 40.6336745     | 5.068E-37 | -1.808834 | down      | PREDICTED: protein TIME FOR COFFEE [Sesamum indicum]                                                  |
| c44821.graph_c0 | 0.01334911    | 0.01336248    | 0.01715413    | 1.56185492     | 1.47219951     | 2.27609179     | 1.874E-18 | 5.896717  | up        | PREDICTED: abnormal spindle-like microcephaly-associated protein homolog isoform X2 [Sesamum indicum] |
| c44826.graph_c0 | 2.38916166    | 1.73931203    | 2.58173162    | 0.50023899     | 0.4769483      | 0.66766447     | 1.199E-09 | -3.049757 | down      | PREDICTED: uncharacterized protein LOC105177426 isoform X1 [Sesamum indicum]                          |
| c44832.graph_c0 | 1.17168327    | 1.33843628    | 1.09824567    | 0.2285854      | 0.21525201     | 0.18079459     | 5.257E-18 | -3.54395  | down      | Ty3/gypsy retrotransposon protein [Beta vulgaris subsp. vulgaris]                                     |
| c44838.graph_c0 | 34.1279597    | 34.5649438    | 31.9376451    | 27.9102004     | 32.7654729     | 35.2644322     | 8.762E-15 | -1.089068 | down      | PREDICTED: uncharacterized protein LOC105170843 [Sesamum indicum]                                     |
| c44839.graph_c0 | 6.42331474    | 6.9332811     | 5.37021135    | 55.7892001     | 34.856899      | 29.1501484     | 0.0039911 | 1.673392  | up        | PREDICTED: crocetin glucosyltransferase, chloroplastic-like, partial [Sesamum indicum]                |
| c44846.graph_c0 | 1.96276064    | 2.10848649    | 2.24539554    | 7.80623153     | 10.3255142     | 10.3404216     | 8.305E-07 | 1.148538  | up        | PREDICTED: uncharacterized protein LOC105173505 [Sesamum indicum]                                     |
| c44848.graph_c0 | 2.93735929    | 3.09781672    | 3.16798715    | 120.203417     | 146.307706     | 169.410144     | 3.538E-57 | 4.543034  | up        | PREDICTED: L-type lectin-domain containing receptor kinase S.4-like [Sesamum indicum]                 |
| c44849.graph_c0 | 111.012853    | 111.252483    | 134.409905    | 16.4936222     | 19.7588861     | 24.1179642     | 3.294E-46 | -3.58709  | down      | hypothetical protein MIMGU_mgv1a011926mg [Erythranthe guttata]                                        |
| c44852.graph_c0 | 6.84805344    | 3.05580358    | 4.02892472    | 0              | 0              | 0              | 4.712E-13 | -Inf      | down      | Ribosomal protein L7 eukaryotic [Macrophomina phaseolina MS6]                                         |
| c44853.graph_c0 | 3.41032651    | 4.42283482    | 3.22478828    | 2.92445694     | 2.86784277     | 3.1472121      | 1.155E-07 | -1.322971 | down      | hypothetical protein MIMGU_mgv1a001275mg [Erythranthe guttata]                                        |
| c44854.graph_c0 | 0.12921769    | 0.19402063    | 0.16604985    | 4.19629276     | 6.55784665     | 7.17637995     | 9.213E-16 | 4.168754  | up        | PREDICTED: GDSL esterase/lipase At4g18970-like [Sesamum indicum]                                      |
| c44856.graph_c0 | 3.37680543    | 3.86307061    | 2.58293373    | 16.1101909     | 22.9911291     | 23.4299033     | 2.768E-10 | 1.649602  | up        | PREDICTED: UDP-galactose transporter 2 [Sesamum indicum]                                              |
| c44858.graph_c0 | 60.6791425    | 64.8343482    | 61.9891189    | 25.5060709     | 25.7668867     | 24.8288804     | 2.056E-58 | -2.318205 | down      | PREDICTED: r-box protein SKP22-like [Sesamum indicum]                                                 |
| c44859.graph_c0 | 0.43534477    | 0.34862456    | 0.11188705    | 3.89838096     | 5.14958091     | 4.86767808     | 2.141E-16 | 2.945866  | up        | PREDICTED: DNA topoisomerase 2-binding protein 1-A isoform X1 [Sesamum indicum]                       |
| c44861.graph_c0 | 80.2069051    | 78.9718656    | 71.2455868    | 112.863139     | 52.8275215     | 33.247119      | 0.0012152 | -1.208453 | down      | PREDICTED: scopoletin glucosyltransferase-like [Sesamum indicum]                                      |
| c44864.graph_c0 | 38.759963     | 38.7213326    | 37.5797543    | 26.3713298     | 27.1066601     | 23.4333412     | 1.416E-27 | -1.597657 | down      | PREDICTED: UPF0183 protein At3g51130 isoform X1 [Sesamum indicum]                                     |
| c44866.graph_c0 | 8.02596963    | 7.93892942    | 7.75052348    | 3.10637466     | 3.38352664     | 3.46477437     | 5.495E-16 | -2.271267 | down      | PREDICTED: transcription repressor OFP13-like [Sesamum indicum]                                       |
| c44868.graph_c2 | 0.14868058    | 0.22324419    | 0.12737362    | 4.81692763     | 4.42578192     | 4.8751544      | 2.149E-17 | 3.808076  | up        | PREDICTED: uncharacterized protein LOC105178110 [Sesamum indicum]                                     |

| #ID             | 0 h-1<br>FPKM | 0 h-2<br>FPKM | 0 h-3<br>FPKM | 48 h-1<br>FPKM | 48 h-2<br>FPKM | 48 h-3<br>FPKM | FDR       | log2FC    | regulated | nr_annotation                                                                                               |
|-----------------|---------------|---------------|---------------|----------------|----------------|----------------|-----------|-----------|-----------|-------------------------------------------------------------------------------------------------------------|
| c44869.graph_c0 | 3.84943796    | 3.42350226    | 3.08216227    | 20.2278538     | 23.1629266     | 22.7197718     | 6.226E-26 | 1.656647  | up        | PREDICTED: kinesin-like protein KIP5A [Sesamum indicum]                                                     |
| c44871.graph_c0 | 0.91417554    | 0.84972731    | 0.75519757    | 19.5209497     | 24.3604323     | 25.5994531     | 1.352E-68 | 3.765517  | up        | PREDICTED: synaptotagmin-2-like [Sesamum indicum]                                                           |
| c44873.graph_c0 | 0             | 0             | 0             | 1.11909583     | 1.0809393      | 1.23006232     | 1.447E-11 | Inf       | up        | PREDICTED: monogalactosyldiacylglycerol synthase 2, chloroplastic [Sesamum indicum]                         |
| c44877.graph_c0 | 13.1432057    | 11.7605445    | 14.2207637    | 10.851075      | 12.3640681     | 11.9170237     | 9.031E-12 | -1.176221 | down      | PREDICTED: vinorine synthase-like [Sesamum indicum]                                                         |
| c44878.graph_c1 | 6.7836841     | 6.72641583    | 8.01827366    | 5.54207352     | 7.27648451     | 4.6690003      | 3.498E-09 | -1.321539 | down      | Taxane 13-alpha-hydroxylase [Medicago truncatula]                                                           |
| c44880.graph_c0 | 0             | 0             | 0             | 1.72579156     | 2.01109358     | 1.1261059      | 5.253E-10 | Inf       | up        | hypothetical protein GUTHDRAFT_152339 [Guillardia theta CCMP2712]                                           |
| c44881.graph_c0 | 5.48615953    | 4.24949346    | 3.44103834    | 0              | 0.19122573     | 0.32122885     | 1.524E-25 | -5.725727 | down      | PREDICTED: xylosyltransferase 2-like [Sesamum indicum]                                                      |
| c44881.graph_c1 | 32.9856868    | 30.6118085    | 26.6338841    | 21.0286382     | 19.6992081     | 16.6290539     | 1.358E-29 | -1.666479 | down      | PREDICTED: protein SPA1-RELATED 3-like isoform X1 [Solanum tuberosum]                                       |
| c44882.graph_c0 | 0.51901797    | 0.17317923    | 0.62249473    | 21.0387409     | 25.8000426     | 30.6896926     | 1.271E-41 | 4.853829  | up        | PREDICTED: uncharacterized protein LOC105178220 [Sesamum indicum]                                           |
| c44883.graph_c0 | 1.25773768    | 1.86112617    | 0.84325707    | 7.27972144     | 7.89877757     | 9.45842525     | 2.99E-08  | 1.621338  | up        | PREDICTED: probable protein phosphatase 2C 34 [Sesamum indicum]                                             |
| c44892.graph_c0 | 0.04949118    | 0             | 0.25439251    | 1.77818565     | 2.92226182     | 3.57013495     | 7.92E-09  | 3.71526   | up        | PREDICTED: uncharacterized protein LOC105176998 [Sesamum indicum]                                           |
| c44894.graph_c0 | 6.37475982    | 4.44746343    | 4.22002784    | 0              | 0              | 0              | 2.089E-28 | -Inf      | down      | unknown [Lotus japonicus]                                                                                   |
| c44896.graph_c0 | 3.18766978    | 2.49042868    | 1.59854902    | 0.78789226     | 1.21407463     | 0.76479468     | 2.062E-06 | -2.411625 | down      | -                                                                                                           |
| c44899.graph_c0 | 2.51658082    | 2.04327064    | 1.97627588    | 11.4891503     | 14.5183057     | 17.0994186     | 3.829E-11 | 1.70037   | up        | PREDICTED: uncharacterized protein LOC105166230 isoform X2 [Sesamum indicum]                                |
| c44900.graph_c1 | 31.8178694    | 33.2519196    | 30.4886242    | 23.8050437     | 25.6335771     | 24.7494412     | 9.043E-23 | -1.383136 | down      | PREDICTED: cell division cycle and apoptosis regulator protein 1 isoform X2 [Sesamum indicum]               |
| c44901.graph_c0 | 1.75540613    | 3.5593833     | 2.42928687    | 32.6341582     | 31.8483505     | 34.793558      | 8.544E-37 | 2.662496  | up        | unnamed protein product [Coffea canephora]                                                                  |
| c44902.graph_c0 | 7.4690821     | 7.51510023    | 7.37171064    | 7.90960953     | 7.0641398      | 7.10104338     | 7.525E-06 | -1.033313 | down      | PREDICTED: uncharacterized aarF domain-containing protein kinase At1g71810, chloroplastic [Sesamum indicum] |
| c44904.graph_c0 | 0             | 0.08000995    | 0             | 2.94546578     | 3.66642751     | 2.78466135     | 4.073E-14 | 5.867806  | up        | PREDICTED: uncharacterized protein LOC105161004 [Sesamum indicum]                                           |
| c44906.graph_c0 | 16.1707019    | 17.6508254    | 15.5178752    | 9.58521658     | 10.8884259     | 9.79620991     | 1.454E-21 | -1.723156 | down      | PREDICTED: pentatricopeptide repeat-containing protein At1g66345, mitochondrial [Sesamum indicum]           |
| c44908.graph_c0 | 38.1384558    | 37.1558797    | 36.3311852    | 29.8511963     | 26.7221702     | 22.7893178     | 1.516E-26 | -1.505675 | down      | hypothetical protein MIMGU_mgv1a001607mg [Erythranthe guttata]                                              |
| c44910.graph_c1 | 9.90997789    | 9.02822472    | 8.01285372    | 4.20582515     | 7.93307339     | 7.5759119      | 3.939E-05 | -1.477169 | down      | -                                                                                                           |
| c44912.graph_c0 | 1.84846455    | 2.20614541    | 1.73583278    | 11.1345169     | 10.8242623     | 11.1312847     | 8.7E-05   | 1.498927  | up        | PREDICTED: uncharacterized protein LOC105178220 [Sesamum indicum]                                           |

| #ID             | 0 h-1<br>FPKM | 0 h-2<br>FPKM | 0 h-3<br>FPKM | 48 h-1<br>FPKM | 48 h-2<br>FPKM | 48 h-3<br>FPKM | FDR       | log2FC    | regulated | nr_annotation                                                                                |
|-----------------|---------------|---------------|---------------|----------------|----------------|----------------|-----------|-----------|-----------|----------------------------------------------------------------------------------------------|
| c44917.graph_c0 | 10.4436366    | 10.5841608    | 9.05830657    | 4.62363918     | 4.5177435      | 5.56533362     | 3.776E-36 | -2.04971  | down      | PREDICTED: serine/threonine-protein kinase CTR1-like [Sesamum indicum]                       |
| c44919.graph_c0 | 84.2917399    | 83.6764122    | 80.546239     | 109.085576     | 58.0846857     | 42.2285945     | 2.57E-05  | -1.248171 | down      | PREDICTED: tuboy-like F-box protein o [Sesamum indicum]                                      |
| c44920.graph_c0 | 5.49603322    | 5.87362127    | 5.2201976     | 50.8776469     | 62.7868002     | 69.7341732     | 1.85E-31  | 2.445337  | up        | PREDICTED: molybdate-anion transporter-like [Sesamum indicum]                                |
| c44922.graph_c0 | 24.7942644    | 24.8613734    | 24.5339836    | 16.6937958     | 12.3671696     | 11.0453112     | 4.05E-31  | -1.897648 | down      | PREDICTED: transcription factor IIIA-like isoform X2 [Sesamum indicum]                       |
| c44927.graph_c0 | 19.9533199    | 19.9733001    | 18.8580677    | 267.74059      | 379.056493     | 460.177031     | 1.419E-14 | 3.210659  | up        | PREDICTED: S-adenosylmethionine synthase 1 [Sesamum indicum]                                 |
| c44928.graph_c0 | 3.06764635    | 3.20821298    | 2.05927829    | 12.3589845     | 14.7908937     | 13.8494013     | 5.829E-06 | 1.282156  | up        | hypothetical protein MIMGU_mgv1a008719mg [Erythranthe guttata]                               |
| c44930.graph_c0 | 0.3678848     | 0.08183404    | 0.21010957    | 1.7322551      | 1.67553908     | 1.40731972     | 0.0008585 | 1.85477   | up        | PREDICTED: FHA domain-containing protein At4g14490 [Sesamum indicum]                         |
| c44935.graph_c0 | 2.50390849    | 3.20821219    | 3.31415019    | 67.7957886     | 81.3031152     | 78.7561353     | 1.71E-117 | 3.635201  | up        | PREDICTED: ABC transporter B family member 19 [Sesamum indicum]                              |
| c44938.graph_c0 | 10.8244615    | 8.93291954    | 7.22038616    | 35.8542456     | 38.2251571     | 35.3573454     | 8.853E-06 | 1.005759  | up        | PREDICTED: signal recognition particle 14 kDa protein-like [Sesamum indicum]                 |
| c44940.graph_c0 | 0.4173852     | 0.35352574    | 0.41258193    | 2.10008427     | 2.00543968     | 1.81600455     | 0.0081483 | 1.306684  | up        | PREDICTED: trimethylguanosine synthase [Sesamum indicum]                                     |
| c44943.graph_c0 | 0.81198698    | 0.78377149    | 0.63351436    | 5.10280629     | 7.24547621     | 6.7512396      | 3.185E-09 | 2.078018  | up        | PREDICTED: GDSL esterase/lipase At4g10955-like [Sesamum indicum]                             |
| c44944.graph_c0 | 10.7029136    | 9.47341988    | 11.0106071    | 9.04885101     | 10.4165725     | 10.3643106     | 2.298E-12 | -1.085018 | down      | PREDICTED: uncharacterized protein LOC105173941 [Sesamum indicum]                            |
| c44946.graph_c0 | 1.19838373    | 1.55945884    | 1.65546832    | 1.13162999     | 1.22806438     | 1.47353789     | 0.0047042 | -1.226114 | down      | PREDICTED: protein TONSOKU [Sesamum indicum]                                                 |
| c44948.graph_c0 | 2.11903549    | 1.85601271    | 2.26920375    | 0.92186925     | 0.54575191     | 0.9167765      | 4.964E-09 | -2.402048 | down      | PREDICTED: protein LURP-one-related 15-like isoform X1 [Sesamum indicum]                     |
| c44950.graph_c0 | 1.01188815    | 1.01290141    | 1.23187864    | 0              | 0              | 0              | 1.64E-18  | -Inf      | down      | hypothetical protein MIMGU_mgv1a010141mg [Erythranthe guttata]                               |
| c44950.graph_c1 | 7.54125966    | 10.7320447    | 10.5081151    | 36.327893      | 41.2339261     | 42.2301871     | 1.759E-06 | 1.03524   | up        | PREDICTED: U6 snRNA-associated Sm-like protein LSm7 [Sesamum indicum]                        |
| c44953.graph_c0 | 2.8128905     | 2.66142186    | 3.0204824     | 8.16474226     | 12.2221964     | 14.845744      | 0.0020717 | 1.025379  | up        | PREDICTED: sucrose nonfermenting 4-like protein [Sesamum indicum]                            |
| c44954.graph_c0 | 0.08087535    | 0             | 0.10392803    | 1.71367599     | 2.88101153     | 4.64075224     | 1.164E-05 | 4.604702  | up        | PREDICTED: exonuclease 1 [Sesamum indicum]                                                   |
| c44955.graph_c0 | 9.85043514    | 10.0468451    | 9.47654369    | 2.03571259     | 2.3644548      | 1.87683584     | 3.296E-54 | -3.244542 | down      | PREDICTED: LOW QUALITY PROTEIN: serine carboxypeptidase 24-like [Sesamum indicum]            |
| c44957.graph_c1 | 1.39953572    | 1.24527746    | 1.59863005    | 6.13154507     | 9.10602129     | 8.08174011     | 1.773E-06 | 1.432426  | up        | PREDICTED: digalactosyldiacylglycerol synthase 2, chloroplastic isoform X1 [Sesamum indicum] |



| #ID             | 0 h-1<br>FPKM | 0 h-2<br>FPKM | 0 h-3<br>FPKM | 48 h-1<br>FPKM | 48 h-2<br>FPKM | 48 h-3<br>FPKM | FDR       | log2FC    | regulated | nr_annotation                                                                                              |
|-----------------|---------------|---------------|---------------|----------------|----------------|----------------|-----------|-----------|-----------|------------------------------------------------------------------------------------------------------------|
| c44963.graph_c1 | 9.59943051    | 9.40603494    | 8.51333472    | 5.57397271     | 6.13586797     | 6.45590595     | 5.391E-15 | -1.61761  | down      | PREDICTED: glutathione gamma-glutamylcysteinyltransferase 1 isoform X2 [Sesamum indicum]                   |
| c44965.graph_c0 | 14.4222345    | 13.6446391    | 15.2054958    | 5.26829375     | 8.88064754     | 12.3236287     | 3.697E-18 | -1.738178 | down      | -                                                                                                          |
| c44970.graph_c0 | 1.2055047     | 1.40134278    | 1.04940473    | 4.69313654     | 4.93385635     | 6.05668464     | 0.0054097 | 1.082876  | up        | PREDICTED: uncharacterized protein LOC105168255 [Sesamum indicum]                                          |
| c44970.graph_c1 | 1.70518142    | 1.7068889     | 1.03794898    | 8.59874378     | 7.62030188     | 9.26961465     | 0.0010679 | 1.506217  | up        | unnamed protein product [Coffea canephora]                                                                 |
| c44971.graph_c0 | 0             | 0.04692261    | 0             | 0.82051352     | 1.05223133     | 1.38332462     | 2.854E-10 | 5.10446   | up        | PREDICTED: probable transcription factor GLK1 [Sesamum indicum]                                            |
| c44973.graph_c0 | 0             | 0             | 0             | 3.04803484     | 2.12435745     | 2.78349473     | 1.734E-11 | Inf       | up        | --                                                                                                         |
| c44975.graph_c0 | 9.42345285    | 9.75538094    | 6.83100564    | 0.1484017      | 0.55024762     | 0.72625817     | 1.586E-32 | -5.223532 | down      | -                                                                                                          |
| c44976.graph_c1 | 12.0529966    | 12.841891     | 12.7772976    | 12.7796616     | 12.2130541     | 10.5363129     | 9.905E-12 | -1.100276 | down      | PREDICTED: N-alpha-acetyltransferase 35, NatC auxiliary subunit isoform X1 [Sesamum indicum]               |
| c44978.graph_c0 | 2.5745445     | 2.65703329    | 2.51335176    | 18.4415026     | 22.8672912     | 22.4296394     | 3.313E-31 | 2.019922  | up        | PREDICTED: uncharacterized protein LOC105173611 isoform X1 [Sesamum indicum]                               |
| c44979.graph_c0 | 0.04162393    | 0             | 0.0534884     | 2.91434758     | 1.78744087     | 1.97899736     | 1.996E-09 | 5.116791  | up        | hypothetical protein MIMGU_mgv1a001060mg [Erythranthe guttata]                                             |
| c44980.graph_c0 | 8.39767196    | 7.47569918    | 9.01024584    | 5.99389666     | 6.9545502      | 6.80367569     | 6.314E-16 | -1.354496 | down      | PREDICTED: probable inactive leucine-rich repeat receptor-like protein kinase At3g03770 [Sesamum indicum]  |
| c44981.graph_c2 | 2.13231431    | 2.08152926    | 2.19661575    | 37.7786915     | 41.6902403     | 41.9504484     | 2.369E-90 | 3.223666  | up        | hypothetical protein MIMGU_mgv1a006718mg [Erythranthe guttata]                                             |
| c44983.graph_c0 | 2.69227651    | 2.51997421    | 3.14516537    | 2.8346294      | 2.11571205     | 1.57639762     | 0.0001606 | -1.367813 | down      | PREDICTED: uncharacterized protein LOC105163946 [Sesamum indicum]                                          |
| c44987.graph_c0 | 2.65136654    | 2.48814514    | 3.46518673    | 2.80345217     | 1.67609213     | 1.40778424     | 1.476E-05 | -1.556088 | down      | unnamed protein product [Coffea canephora]                                                                 |
| c44990.graph_c0 | 17.7974046    | 18.1043169    | 17.2107649    | 8.68030411     | 8.2092146      | 7.69408975     | 2.67E-34  | -2.126736 | down      | PREDICTED: protein WEAK CHLOROPLAST MOVEMENT UNDER BLUE LIGHT 1-like isoform X2 [Sesamum indicum]          |
| c44994.graph_c0 | 0.7522608     | 0.7308666     | 0.59707009    | 0.04076657     | 0.58302773     | 0.25391695     | 2.614E-06 | -2.287481 | down      | PREDICTED: G-type leucine 5-receptor-like serine/threonine-protein kinase RLK1 isoform X1 [Vitis vinifera] |
| c44996.graph_c0 | 69.7346194    | 65.9890045    | 71.4421605    | 14.6982161     | 13.4275325     | 10.2067936     | 2.87E-117 | -3.448158 | down      | PREDICTED: protein FAR1-RELATED SEQUENCE 5-like [Sesamum indicum]                                          |
| c45006.graph_c0 | 49.9460539    | 43.7946321    | 47.8284221    | 22.9625375     | 21.4668961     | 18.3060625     | 1.427E-47 | -2.189023 | down      | PREDICTED: uncharacterized protein LOC103488200 [Cucumis melo]                                             |
| c45009.graph_c0 | 0             | 0             | 0             | 0.87305274     | 0.60696137     | 0.50979933     | 5.268E-10 | Inf       | up        | --                                                                                                         |
| c45012.graph_c0 | 16.6244461    | 17.0790165    | 16.7472278    | 5.13345822     | 4.65174893     | 5.53033899     | 5.047E-62 | -2.736771 | down      | PREDICTED: peptide-N(4)-(N-acetyl-beta-glucosaminyl)asparagine amidase isoform X2 [Sesamum indicum]        |
| c45014.graph_c1 | 32.0951012    | 33.760828     | 29.0601729    | 27.1816518     | 26.3686371     | 23.5702705     | 1.238E-20 | -1.31424  | down      | PREDICTED: TBC1 domain family member 15 [Sesamum indicum]                                                  |

| #ID             | 0 h-1<br>FPKM | 0 h-2<br>FPKM | 0 h-3<br>FPKM | 48 h-1<br>FPKM | 48 h-2<br>FPKM | 48 h-3<br>FPKM | FDR       | log2FC    | regulated | nr_annotation                                                                          |
|-----------------|---------------|---------------|---------------|----------------|----------------|----------------|-----------|-----------|-----------|----------------------------------------------------------------------------------------|
| c45015.graph_c0 | 13.7244357    | 16.8696752    | 14.1350905    | 5.02035035     | 6.79580035     | 6.94878731     | 1.585E-14 | -2.275782 | down      | PREDICTED: protein HEADING DATE 3A-like [Sesamum indicum]                              |
| c45017.graph_c0 | 0.24815557    | 0.34155558    | 0.2590979     | 2.01468814     | 1.92239972     | 2.51734868     | 3.449E-06 | 1.90891   | up        | PREDICTED: calcium-transporting ATPase 12, plasma membrane-type-like [Sesamum indicum] |
| c45018.graph_c0 | 0             | 0             | 0             | 15.063166      | 37.7080222     | 15.7899705     | 3.889E-08 | Inf       | up        | hypothetical protein DI09_20p90 [Microsporidia sp. UGP3]                               |
| c45019.graph_c0 | 55.6912742    | 51.0043415    | 45.9243801    | 3.19262207     | 3.69927682     | 3.32903428     | 8.32E-203 | -4.91806  | down      | BnaAnng27240D [Brassica napus]                                                         |
| c45024.graph_c0 | 0.05279945    | 0             | 0.06784939    | 0.94041782     | 1.21955801     | 1.24073998     | 8.393E-10 | 3.785448  | up        | PREDICTED: uncharacterized protein LOC105156561 isoform X1 [Sesamum indicum]           |
| c45030.graph_c0 | 0.96081742    | 1.37633968    | 1.04309884    | 6.92872629     | 5.56169604     | 5.96144497     | 1.61E-08  | 1.435585  | up        | PREDICTED: protein FAM91A1 isoform X1 [Sesamum indicum]                                |
| c45031.graph_c0 | 28.4434448    | 30.0712008    | 28.2764391    | 16.7928334     | 18.6404873     | 16.7479215     | 1.209E-33 | -1.752365 | down      | PREDICTED: uncharacterized protein LOC105156468 [Sesamum indicum]                      |
| c45033.graph_c1 | 1.22881852    | 1.02156611    | 0.66910188    | 3.95264339     | 3.92309638     | 4.23410439     | 0.0024287 | 1.039995  | up        | hypothetical protein MIMGU_mgv1a021825mg [Erythranthe guttata]                         |
| c45035.graph_c0 | 4.04935496    | 4.48008449    | 4.30371398    | 1.15001298     | 2.43659861     | 2.72041305     | 8.393E-12 | -2.055498 | down      | PREDICTED: protein NRT1/ PTR FAMILY 4.5-like [Sesamum indicum]                         |
| c45041.graph_c0 | 97.5218459    | 95.8197111    | 88.4167488    | 43.1136746     | 37.6165516     | 32.0308501     | 6.718E-59 | -2.333627 | down      | PREDICTED: NF-kappa-B-activating protein [Sesamum indicum]                             |
| c45043.graph_c0 | 1.46163766    | 0.88250552    | 1.40124327    | 8.8060484      | 9.12515295     | 8.2349547      | 5.922E-12 | 1.785912  | up        | PREDICTED: protein downstream neighbor of Son [Sesamum indicum]                        |
| c45045.graph_c0 | 0.43575289    | 0.43618923    | 0             | 24.4880832     | 10.8446713     | 20.3605394     | 4.486E-07 | 5.00645   | up        | -                                                                                      |
| c45047.graph_c0 | 0.44647374    | 0.37988269    | 0.45898914    | 3.53735825     | 4.0088488      | 4.08079641     | 2.25E-08  | 2.156408  | up        | PREDICTED: subtilisin-like protease SB15.5 [Sesamum indicum]                           |
| c45048.graph_c2 | 3.06581004    | 3.23599721    | 3.41309541    | 12.1785815     | 14.8125492     | 17.4925586     | 7.996E-09 | 1.171765  | up        | PREDICTED: metalloendoproteinase 1-like [Sesamum indicum]                              |
| c45055.graph_c0 | 56.1000721    | 60.1566661    | 52.4367033    | 24.139055      | 24.9858788     | 20.93689       | 9.363E-58 | -2.283483 | down      | PREDICTED: transcription factor GTE9-like isoform X2 [Sesamum indicum]                 |
| c45056.graph_c0 | 2.14655714    | 1.32928459    | 2.22075454    | 9.73691226     | 8.84149532     | 8.23139927     | 1.625E-08 | 1.21755   | up        | PREDICTED: uncharacterized protein LOC105167041 isoform X1 [Sesamum indicum]           |
| c45058.graph_c0 | 0.60482662    | 0.53816201    | 1.29537693    | 10.091615      | 11.0187823     | 10.7973855     | 8.424E-11 | 2.681403  | up        | -                                                                                      |
| c45060.graph_c0 | 16.8203486    | 15.4547261    | 14.5952971    | 12.229688      | 14.525061      | 13.669968      | 2.025E-16 | -1.23245  | down      | PREDICTED: chitin elicitor receptor kinase 1-like [Sesamum indicum]                    |
| c45063.graph_c0 | 89.4575033    | 81.6406427    | 82.1117382    | 81.4329668     | 77.2604135     | 83.298249      | 1.022E-13 | -1.081776 | down      | PREDICTED: serine/arginine-rich splicing factor RSZ22 isoform X2 [Vitis vinifera]      |
| c45063.graph_c2 | 0             | 0             | 0             | 2.84546801     | 2.28365782     | 2.07153845     | 2.095E-11 | Inf       | up        | PREDICTED: KH domain-containing protein At4g18375 [Sesamum indicum]                    |
| c45070.graph_c0 | 20.2945197    | 21.5979651    | 17.9122309    | 15.2882471     | 14.2782886     | 14.5471964     | 2.429E-25 | -1.453694 | down      | PREDICTED: CCR4-NOT transcription complex subunit 1 isoform X1 [Sesamum indicum]       |
| c45072.graph_c0 | 51.0523768    | 51.2982707    | 46.9138125    | 16.2900575     | 21.8387254     | 23.5764722     | 1.583E-55 | -2.296793 | down      | PREDICTED: extensin [Sesamum indicum]                                                  |

| #ID             | 0 h-1<br>FPKM | 0 h-2<br>FPKM | 0 h-3<br>FPKM | 48 h-1<br>FPKM | 48 h-2<br>FPKM | 48 h-3<br>FPKM | FDR       | log2FC    | regulated | nr_annotation                                                                                            |
|-----------------|---------------|---------------|---------------|----------------|----------------|----------------|-----------|-----------|-----------|----------------------------------------------------------------------------------------------------------|
| c45073.graph_c0 | 46.9195677    | 48.8014571    | 49.6028436    | 22.4408174     | 25.5967493     | 21.3547519     | 1.157E-46 | -2.085517 | down      | hypothetical protein MIMGU_mgv1a005118mg<br>[Erythranthe guttata]                                        |
| c45073.graph_c2 | 2.90514396    | 2.90805303    | 2.28141529    | 1.58601962     | 1.68019547     | 1.7640384      | 5.848E-05 | -1.70269  | down      | PREDICTED: phosphatidylcholine:diacylglycerol<br>cholinephosphotransferase 1-like [Sesamum indicum]      |
| c45075.graph_c0 | 152.483753    | 147.835513    | 148.12963     | 42.2957559     | 57.0420505     | 54.0114859     | 2.699E-67 | -2.570485 | down      | PREDICTED: uncharacterized protein LOC105179151<br>[Sesamum indicum]                                     |
| c45078.graph_c0 | 273.655042    | 248.88511     | 259.444151    | 3.58540714     | 2.75049608     | 3.17455808     | 0         | -7.374601 | down      | PREDICTED: uncharacterized protein LOC105174597<br>[Sesamum indicum]                                     |
| c45079.graph_c0 | 1.24903221    | 1.25620844    | 1.19428326    | 6.99139577     | 7.80517179     | 8.55980576     | 1.262E-24 | 1.638716  | up        | PREDICTED: probable LRR receptor-like serine/threonine-<br>protein kinase At4g20940 [Sesamum indicum]    |
| c45081.graph_c0 | 4.7870349     | 5.10893468    | 3.79947402    | 18.5484828     | 23.6691597     | 22.2173653     | 8.947E-10 | 1.215269  | up        | PREDICTED: uncharacterized protein LOC105177718<br>[Sesamum indicum]                                     |
| c45085.graph_c0 | 39.9913624    | 40.7488164    | 36.8022175    | 33.039539      | 35.4210662     | 35.8608575     | 2.95E-17  | -1.190021 | down      | PREDICTED: protein DEK [Sesamum indicum]                                                                 |
| c45088.graph_c0 | 0.56035845    | 0.56091956    | 0.72008279    | 4.24462973     | 5.65122105     | 5.3079998      | 3.053E-05 | 2.020472  | up        | PREDICTED: uncharacterized protein LOC104801838<br>isoform X2 [Tarenaya hassleriana]                     |
| c45092.graph_c0 | 1.01112717    | 0.82470639    | 0.67373105    | 0              | 0              | 0              | 1.804E-19 | -Inf      | down      | -                                                                                                        |
| c45094.graph_c0 | 27.2853971    | 27.3875487    | 26.8975024    | 22.065542      | 17.4077959     | 18.1876026     | 6.466E-27 | -1.513315 | down      | PREDICTED: pentatricopeptide repeat-containing protein<br>At1g63330-like [Sesamum indicum]               |
| c45095.graph_c1 | 0.3721209     | 0.10642672    | 0.06831287    | 1.86103394     | 2.02342243     | 1.91740052     | 6.381E-05 | 2.401269  | up        | PREDICTED: putative phospholipid-transporting ATPase 5<br>[Sesamum indicum]                              |
| c45095.graph_c2 | 0.54124028    | 0.61917972    | 0.39743725    | 5.55611663     | 5.20687433     | 5.54592855     | 4.087E-08 | 2.37499   | up        | PREDICTED: putative phospholipid-transporting ATPase 5<br>[Sesamum indicum]                              |
| c45104.graph_c0 | 64.4749031    | 62.2293275    | 58.7939802    | 40.7683569     | 40.9930733     | 35.9680199     | 1.001E-32 | -1.671598 | down      | PREDICTED: mRNA-decapping enzyme-like protein<br>[Sesamum indicum]                                       |
| c45105.graph_c0 | 0.63454337    | 0.40116554    | 0.47208141    | 6.09196747     | 6.4862953      | 5.94075423     | 5.863E-11 | 2.602264  | up        | hypothetical protein VITISV_036763 [Vitis vinifera]                                                      |
| c45113.graph_c0 | 5.26336289    | 2.4085181     | 3.60726917    | 0              | 0              | 0              | 3.828E-16 | -Inf      | down      | --                                                                                                       |
| c45114.graph_c0 | 161.019614    | 176.007028    | 192.62196     | 33.8581599     | 41.5068253     | 39.8499809     | 1.061E-60 | -3.223282 | down      | PREDICTED: serine/arginine repetitive matrix protein 1-<br>like [Sesamum indicum]                        |
| c45124.graph_c0 | 24.886053     | 22.1069053    | 21.1803644    | 14.7349963     | 14.4987257     | 14.2074074     | 2.658E-31 | -1.665778 | down      | PREDICTED: elongation factor Tu GTP-binding domain-<br>containing protein 1 isoform X1 [Sesamum indicum] |
| c45132.graph_c0 | 2.04244581    | 2.68173496    | 2.82913987    | 3.05460114     | 1.70859718     | 1.86996042     | 0.0003357 | -1.196055 | down      | ribosomal protein S3 (mitochondrion) [Rhazya stricta]                                                    |
| c45134.graph_c0 | 1.35216416    | 1.43638661    | 1.89715857    | 9.4698761      | 14.2335839     | 16.2869582     | 1.701E-08 | 2.064148  | up        | PREDICTED: filament-like plant protein [Sesamum<br>indicum]                                              |
| c45138.graph_c0 | 34.3803299    | 30.8617326    | 31.9815022    | 30.9509599     | 32.2651351     | 30.1789439     | 5.266E-13 | -1.075285 | down      | PREDICTED: actin-related protein 7 isoform X1 [Sesamum<br>indicum]                                       |
| c45139.graph_c0 | 25.9409548    | 26.0996407    | 25.1575352    | 18.0358352     | 16.2170417     | 15.0700721     | 1.017E-24 | -1.660678 | down      | unnamed protein product [Coffea canephora]                                                               |
| c45141.graph_c0 | 2.39613337    | 2.47121555    | 1.95944398    | 18.7523831     | 16.5824554     | 17.6182555     | 6.471E-23 | 1.942178  | up        | PREDICTED: uncharacterized protein LOC105159160<br>[Sesamum indicum]                                     |

| #ID             | 0 h-1<br>FPKM | 0 h-2<br>FPKM | 0 h-3<br>FPKM | 48 h-1<br>FPKM | 48 h-2<br>FPKM | 48 h-3<br>FPKM | FDR       | log2FC    | regulated | nr_annotation                                                                                     |
|-----------------|---------------|---------------|---------------|----------------|----------------|----------------|-----------|-----------|-----------|---------------------------------------------------------------------------------------------------|
| c45143.graph_c0 | 0.72688729    | 0.90951894    | 0.54487938    | 8.48230906     | 9.16333275     | 6.6537238      | 3.294E-08 | 2.464744  | up        | PREDICTED: serine/threonine-protein kinase Nek6-like [Sesamum indicum]                            |
| c45144.graph_c0 | 15.3843443    | 14.0689068    | 13.6677966    | 70.4653616     | 75.6822592     | 70.0616932     | 4.255E-20 | 1.308702  | up        | PREDICTED: protein COBRA-like [Sesamum indicum]                                                   |
| c45147.graph_c0 | 108.327671    | 112.504683    | 107.060343    | 26.5004433     | 26.6609424     | 22.4645713     | 6.832E-93 | -3.132241 | down      | PREDICTED: phytochrome C [Sesamum indicum]                                                        |
| c45149.graph_c0 | 1.07932017    | 0.92034154    | 1.07875378    | 4.52977173     | 5.46198491     | 5.57069772     | 0.0008443 | 1.316146  | up        | PREDICTED: pncopyrinase, chloroplastic [Sesamum indicum]                                          |
| c45149.graph_c2 | 208.329895    | 197.995608    | 222.777664    | 142.02087      | 178.242117     | 181.222405     | 7.53E-19  | -1.349796 | down      | PREDICTED: carbonic anhydrase $\alpha$ -like [Sesamum indicum]                                    |
| c45150.graph_c0 | 5.02032182    | 3.96531437    | 3.85566712    | 15.8805356     | 18.8522745     | 20.0462061     | 2.049E-10 | 1.073767  | up        | hypothetical protein MIMGU_mgv1a000966mg [Erythranthe guttata]                                    |
| c45151.graph_c0 | 0             | 0             | 0             | 4.98844812     | 5.08746725     | 4.43869114     | 2.009E-21 | Inf       | up        | mitochondrial carrier, adenine nucleotidetranslocator [Galdieria sulphuraria]                     |
| c45155.graph_c0 | 0.67468297    | 0.95675797    | 0.57799622    | 4.26460567     | 5.77989919     | 5.37699258     | 6.749E-09 | 1.783583  | up        | PREDICTED: proline-rich receptor-like protein kinase PERK8 [Sesamum indicum]                      |
| c45156.graph_c1 | 58.1948419    | 55.7806183    | 55.4940473    | 36.9838879     | 37.5904946     | 32.9302913     | 1.571E-32 | -1.673003 | down      | PREDICTED: casein kinase I isoform alpha-like isoform X2 [Sesamum indicum]                        |
| c45158.graph_c0 | 0.01463921    | 0             | 0.03762392    | 4.93609232     | 5.31491572     | 5.78413862     | 9.126E-50 | 7.224178  | up        | PREDICTED: uncharacterized protein LOC105177021 [Sesamum indicum]                                 |
| c45162.graph_c0 | 0             | 0             | 0             | 1.15971879     | 1.10572329     | 1.05254902     | 1.462E-12 | Inf       | up        | -                                                                                                 |
| c45163.graph_c0 | 1.31455666    | 0.83547492    | 0.64352661    | 0              | 0              | 0              | 2.185E-15 | -Inf      | down      | -                                                                                                 |
| c45169.graph_c0 | 21.094801     | 20.0008919    | 22.0081947    | 22.7690984     | 21.5391221     | 17.862872      | 3.311E-11 | -1.037049 | down      | hypothetical protein MIMGU_mgv1a012191mg [Erythranthe guttata]                                    |
| c45170.graph_c0 | 0.48349414    | 0.31393186    | 0.50376415    | 5.03211378     | 6.7975535      | 7.41258577     | 8.635E-22 | 2.860835  | up        | PREDICTED: probable LRR receptor-like serine/threonine-protein kinase At4g26540 [Sesamum indicum] |
| c45175.graph_c0 | 0             | 0             | 0             | 67.7934434     | 143.749559     | 39.964629      | 1.133E-08 | Inf       | up        | predicted protein [Hordeum vulgare subsp. vulgare]                                                |
| c45180.graph_c0 | 6.30938785    | 6.25944111    | 5.86868437    | 89.3253349     | 81.2303921     | 77.2694965     | 2.056E-51 | 2.734218  | up        | PREDICTED: pentatricopeptide repeat-containing protein At5g24830 isoform X1 [Sesamum indicum]     |
| c45181.graph_c0 | 10.0014826    | 9.9856281     | 10.1954947    | 6.78551724     | 8.55045156     | 9.57560007     | 3.785E-13 | -1.299623 | down      | hypothetical protein MIMGU_mgv1a002860mg [Erythranthe guttata]                                    |
| c45183.graph_c0 | 2.35360189    | 2.35595866    | 1.84098272    | 11.6899198     | 15.0139992     | 15.9100053     | 1.324E-11 | 1.681759  | up        | hyponeucal protein OsJ_01978 [Oryza sativa japonica Group]                                        |
| c45186.graph_c2 | 8.98318035    | 8.35648199    | 7.95301533    | 6.55263402     | 7.15583272     | 7.29758302     | 2.257E-17 | -1.286111 | down      | PREDICTED: E3 ubiquitin-protein ligase listerin isoform X2 [Sesamum indicum]                      |
| c45187.graph_c0 | 1.02135072    | 0.4868445     | 0.62498863    | 4.97351306     | 4.84163126     | 5.74106207     | 3.765E-05 | 1.851323  | up        | PREDICTED: acer-like protein 4 isoform A1 [Sesamum indicum]                                       |
| c45187.graph_c1 | 0.39843388    | 0.15953314    | 0.20480132    | 2.128967       | 2.25538239     | 2.48224129     | 0.0002001 | 2.155707  | up        | PREDICTED: acer-like protein 4 isoform A1 [Sesamum indicum]                                       |
| c45187.graph_c2 | 0.19175547    | 0.28792123    | 0.12320669    | 2.22588635     | 2.82592508     | 2.57789815     | 6.939E-09 | 2.646035  | up        | PREDICTED: acer-like protein 4 isoform A2 [Sesamum indicum]                                       |
| c45189.graph_c1 | 0             | 0             | 0             | 5.5505209      | 6.55857738     | 7.97809404     | 1.644E-11 | Inf       | up        | hypothetical protein JCGZ_03401 [Jatropha curcas]                                                 |
| c45190.graph_c0 | 14.0886466    | 12.5286427    | 14.7640086    | 236.053237     | 323.079885     | 343.680642     | 8.516E-33 | 3.422834  | up        | PREDICTED: beta-glucosidase 24-like [Eucalyptus grandis]                                          |

| #ID             | 0 h-1<br>FPKM | 0 h-2<br>FPKM | 0 h-3<br>FPKM | 48 h-1<br>FPKM | 48 h-2<br>FPKM | 48 h-3<br>FPKM | FDR       | log2FC    | regulated | nr_annotation                                                                |
|-----------------|---------------|---------------|---------------|----------------|----------------|----------------|-----------|-----------|-----------|------------------------------------------------------------------------------|
| c45193.graph_c0 | 0             | 0             | 0.03623667    | 0.98718845     | 1.15589135     | 2.19598587     | 1.608E-06 | 5.84608   | up        | PREDICTED: cellulose synthase-like protein G2 [Sesamum indicum]              |
| c45194.graph_c0 | 1.76913513    | 1.46947573    | 2.0799271     | 17.5814944     | 20.8296581     | 22.7098941     | 2.018E-26 | 2.498769  | up        | hypothetical protein OsI_30754 [Oryza sativa Indica Group]                   |
| c45195.graph_c0 | 0.05059501    | 0.05064567    | 0.06501659    | 1.39834266     | 1.28385789     | 2.19815184     | 9.166E-08 | 3.852244  | up        | PREDICTED: glutamine-dependent NAD(+) synthetase-like [Sesamum indicum]      |
| c45195.graph_c1 | 0.19245222    | 0.04816123    | 0.24730873    | 1.55137097     | 2.01914416     | 1.53816063     | 3.628E-05 | 2.360557  | up        | PREDICTED: glutamine-dependent NAD(+) synthetase-like [Sesamum indicum]      |
| c45196.graph_c0 | 13.9914558    | 14.8162022    | 14.362844     | 5.57751469     | 6.95606213     | 7.26997825     | 9.174E-41 | -2.146188 | down      | PREDICTED: eukaryotic translation initiation factor 2D [Sesamum indicum]     |
| c45198.graph_c0 | 36.1787492    | 37.5813431    | 35.6287127    | 7.36056857     | 4.75435427     | 3.38761534     | 2.78E-143 | -3.824198 | down      | hypothetical protein MIMGU_mgv1a000338mg [Erythranthe guttata]               |
| c45198.graph_c1 | 34.7965878    | 35.8175002    | 35.6305148    | 11.3974109     | 12.5831564     | 15.6276505     | 7.559E-60 | -2.444614 | down      | cryptochrome 1 family protein [Populus trichocarpa]                          |
| c45201.graph_c0 | 22.0402413    | 20.0152927    | 25.4027288    | 18.4209474     | 14.8578287     | 8.94046266     | 6.217E-07 | -1.687339 | down      | -                                                                            |
| c45201.graph_c2 | 2.78827122    | 2.20688722    | 2.83310054    | 11.8878773     | 11.549558      | 12.331863      | 1.315E-06 | 1.173534  | up        | PREDICTED: ras-related protein RABH1e-like [Sesamum indicum]                 |
| c45202.graph_c0 | 31.0236304    | 31.3234782    | 26.2503734    | 23.0436625     | 26.2463915     | 26.0915253     | 3.298E-19 | -1.251087 | down      | PREDICTED: OTU domain-containing protein 5 isoform X2 [Sesamum indicum]      |
| c45206.graph_c0 | 15.4898248    | 17.1338545    | 14.781552     | 11.948157      | 14.4690502     | 13.2422893     | 6.238E-17 | -1.276882 | down      | PREDICTED: uncharacterized protein LOC105171856 [Sesamum indicum]            |
| c45208.graph_c0 | 18.2590242    | 18.9000901    | 15.6076185    | 12.2360139     | 14.388192      | 13.282345      | 3.764E-20 | -1.421123 | down      | PREDICTED: uncharacterized protein At2g33490 [Sesamum indicum]               |
| c45210.graph_c1 | 4.20390776    | 4.49833232    | 2.42167044    | 32.398929      | 31.5780496     | 29.6126561     | 4.24E-31  | 2.061844  | up        | PREDICTED: pleiotropic drug resistance protein 1-like [Sesamum indicum]      |
| c45213.graph_c1 | 0.04501424    | 0.3604745     | 0.17353523    | 80.2860196     | 104.822923     | 96.0501856     | 1.98E-152 | 7.90084   | up        | PREDICTED: nudix hydrolase 18, mitochondrial-like [Sesamum indicum]          |
| c45215.graph_c1 | 2.21491176    | 3.56569307    | 2.64084987    | 71.7758586     | 52.5935676     | 42.9203144     | 8.728E-10 | 3.30293   | up        | PREDICTED: U-box domain-containing protein 13 [Sesamum indicum]              |
| c45216.graph_c1 | 2.836692      | 2.14696361    | 2.93399099    | 0.19122042     | 0.1350499      | 0.17014678     | 7.668E-17 | -5.009346 | down      | -                                                                            |
| c45216.graph_c2 | 31.437625     | 31.3199624    | 27.139813     | 31.6390098     | 30.5003748     | 25.8010949     | 6.153E-13 | -1.045616 | down      | PREDICTED: calpain-15 [Sesamum indicum]                                      |
| c45217.graph_c0 | 4.34449378    | 3.34526472    | 3.81136637    | 22.0903406     | 22.6274053     | 24.1417697     | 1.093E-13 | 1.564009  | up        | PREDICTED: pyridoxal reductase, chloroplastic isoform X2 [Sesamum indicum]   |
| c45218.graph_c0 | 98.9272002    | 98.191523     | 96.7822241    | 39.7870356     | 38.3800688     | 34.6827068     | 9.528E-63 | -2.396642 | down      | PREDICTED: 4-coumarate--CoA ligase 1-like [Sesamum indicum]                  |
| c45223.graph_c0 | 3.90105376    | 3.37465685    | 2.78500474    | 20.232355      | 16.545333      | 17.0551211     | 3.623E-08 | 1.409133  | up        | PREDICTED: uncharacterized protein LOC105166056 isoform X1 [Sesamum indicum] |
| c45225.graph_c0 | 5.29028877    | 3.32024849    | 3.56097789    | 23.2470572     | 24.6684157     | 25.3659111     | 5.139E-14 | 1.57395   | up        | hypothetical protein MIMGU_mgv1a011604mg [Erythranthe guttata]               |

| #ID             | 0 h-1<br>FPKM | 0 h-2<br>FPKM | 0 h-3<br>FPKM | 48 h-1<br>FPKM | 48 h-2<br>FPKM | 48 h-3<br>FPKM | FDR       | log2FC    | regulated | nr_annotation                                                                                   |
|-----------------|---------------|---------------|---------------|----------------|----------------|----------------|-----------|-----------|-----------|-------------------------------------------------------------------------------------------------|
| c45227.graph_c0 | 123.706499    | 131.599807    | 115.83258     | 45.5939698     | 43.0689689     | 38.2734869     | 7.376E-71 | -2.562287 | down      | PREDICTED: uncharacterized protein LOC105178162 [Sesamum indicum]                               |
| c45227.graph_c1 | 6.32629514    | 6.54094017    | 6.73896056    | 5.36807501     | 5.36186315     | 5.39059983     | 9.034E-07 | -1.300405 | down      | PREDICTED: DNA-(apurinic or apyrimidinic site) lyase 2 isoform X1 [Sesamum indicum]             |
| c45234.graph_c0 | 9.91884346    | 10.1702864    | 9.95574268    | 3.95151808     | 3.37508687     | 3.47208656     | 6.515E-37 | -2.490724 | down      | -                                                                                               |
| c45235.graph_c0 | 48.9696439    | 50.1154831    | 42.9989478    | 16.8239355     | 17.2745221     | 16.2825761     | 7.965E-68 | -2.511795 | down      | PREDICTED: outer envelope protein O1 [Sesamum indicum]                                          |
| c45238.graph_c0 | 403.374093    | 396.509747    | 391.610168    | 289.31224      | 385.159853     | 427.133978     | 5.817E-13 | -1.136285 | down      | PREDICTED: 8-hydroxygeraniol dehydrogenase [Sesamum indicum]                                    |
| c45240.graph_c0 | 71.0528903    | 74.2869097    | 66.4231309    | 33.7369074     | 34.3959529     | 29.2219354     | 6.171E-51 | -2.136802 | down      | PREDICTED: crt homolog 1 [Sesamum indicum]                                                      |
| c45246.graph_c0 | 0.13556302    | 0.09046585    | 0.05806795    | 19.7741709     | 24.1677649     | 28.0778175     | 5.768E-57 | 6.970744  | up        | PREDICTED: WAT1-related protein At5g40240-like [Sesamum indicum]                                |
| c45248.graph_c0 | 194.914687    | 191.294407    | 202.196762    | 167.340918     | 165.341161     | 154.541097     | 3.456E-17 | -1.289365 | down      | PREDICTED: adenylate adenyltransferase [Nicotiana glauca]                                       |
| c45251.graph_c0 | 0.60149642    | 0.88730339    | 0.44749547    | 4.52059733     | 4.85081859     | 5.39780172     | 1.845E-06 | 1.915978  | up        | PREDICTED: uncharacterized protein LOC105179935 isoform X1 [Sesamum indicum]                    |
| c45253.graph_c0 | 0             | 0             | 0             | 13.6669756     | 23.4211085     | 25.3945965     | 2.7E-12   | Inf       | up        | -                                                                                               |
| c45255.graph_c1 | 78.5206363    | 81.9231123    | 67.3684844    | 84.1427958     | 71.7154093     | 68.2089715     | 4.05E-14  | -1.035959 | down      | PREDICTED: anamorsin homolog isoform X1 [Sesamum indicum]                                       |
| c45257.graph_c0 | 2.92607756    | 3.2014734     | 2.66706577    | 18.462366      | 19.492225      | 16.9576281     | 5.811E-14 | 1.626335  | up        | PREDICTED: acyl-coenzyme A thioesterase 8-like [Sesamum indicum]                                |
| c45258.graph_c0 | 29.6324645    | 25.4331977    | 23.9331176    | 1129.5795      | 1120.57687     | 1065.08841     | 2.07E-157 | 4.376023  | up        | ascorbate peroxidase [Acanthus ebracteatus]                                                     |
| c45259.graph_c0 | 0.08349071    | 0.16714864    | 0.21457775    | 7.48659694     | 8.74598498     | 10.5626298     | 1.942E-34 | 4.819063  | up        | PREDICTED: LRR receptor-like serine/threonine-protein kinase FEI 2 isoform X1 [Sesamum indicum] |
| c45266.graph_c0 | 2.253657      | 1.73531823    | 2.3231957     | 78.0520258     | 97.7689353     | 98.5011642     | 7.02E-116 | 4.418608  | up        | PREDICTED: phosphomethylpyrimidine synthase, chloroplastic isoform X1 [Sesamum indicum]         |
| c45267.graph_c1 | 28.5193895    | 29.3636029    | 27.7206285    | 124.178851     | 127.157588     | 133.168864     | 2.626E-16 | 1.149452  | up        | PREDICTED: uncharacterized protein LOC105158383 [Sesamum indicum]                               |
| c45267.graph_c2 | 0.54284464    | 1.19545407    | 0.13951537    | 34.6071889     | 41.0064756     | 45.299924      | 2.033E-39 | 4.998587  | up        | -                                                                                               |
| c45279.graph_c0 | 8.66155866    | 7.87936615    | 7.5957772     | 76.1026704     | 99.0419908     | 97.0039974     | 1.304E-44 | 2.474012  | up        | PREDICTED: peroxidase 7 [Sesamum indicum]                                                       |
| c45282.graph_c0 | 144.030981    | 136.330166    | 148.096257    | 40.2264538     | 37.1868303     | 42.4841384     | 1.714E-82 | -2.854838 | down      | branched-chain amino acid aminotransferase, putative [Ricinus communis]                         |
| c45285.graph_c0 | 11.6343034    | 11.0198269    | 11.7353705    | 0.69150188     | 1.00727329     | 0.87166681     | 4.175E-88 | -4.765533 | down      | PREDICTED: U-box domain-containing protein 19-like [Sesamum indicum]                            |
| c45290.graph_c0 | 0.80401608    | 0.98367033    | 0.688795      | 6.50180581     | 8.02132263     | 7.61604863     | 1.72E-05  | 2.141623  | up        | -                                                                                               |
| c45290.graph_c1 | 18.9139961    | 18.949558     | 17.1139575    | 12.2080737     | 14.4402        | 14.864707      | 5.267E-23 | -1.424983 | down      | PREDICTED: WD repeat-containing protein 26-like [Sesamum indicum]                               |

| #ID             | 0 h-1<br>FPKM | 0 h-2<br>FPKM | 0 h-3<br>FPKM | 48 h-1<br>FPKM | 48 h-2<br>FPKM | 48 h-3<br>FPKM | FDR       | log2FC    | regulated | nr_annotation                                                                             |
|-----------------|---------------|---------------|---------------|----------------|----------------|----------------|-----------|-----------|-----------|-------------------------------------------------------------------------------------------|
| c45292.graph_c0 | 0.62928407    | 0.71390276    | 0.43128264    | 94.1493748     | 134.337617     | 123.012307     | 5.91E-80  | 6.61088   | up        | PREDICTED: pentatricopeptide repeat-containing protein At5g59600 [Sesamum indicum]        |
| c45297.graph_c0 | 5.17558453    | 2.10743068    | 3.15632659    | 0              | 0              | 0              | 5.366E-11 | -Inf      | down      | hypothetical protein SORBIDRAFT_05g002010 [Sorghum bicolor]                               |
| c45300.graph_c0 | 68.3283747    | 74.0017582    | 60.5873056    | 13.9055004     | 12.5927927     | 12.9717256     | 5.005E-93 | -3.376188 | down      | PREDICTED: uncharacterized protein LOC105166619 [Sesamum indicum]                         |
| c45303.graph_c0 | 2.46053958    | 3.39724612    | 3.05286006    | 284.523681     | 369.485888     | 346.644677     | 5.08E-143 | 5.788411  | up        | PREDICTED: S-type anion channel SLAH2 [Sesamum indicum]                                   |
| c45304.graph_c0 | 62.763009     | 60.6965632    | 58.2143091    | 59.5441747     | 58.4714691     | 59.8610922     | 1.043E-13 | -1.047029 | down      | PREDICTED: cytochrome b-c1 complex subunit Rieske-4, mitochondrial-like [Sesamum indicum] |
| c45320.graph_c1 | 7.15344582    | 10.0037919    | 7.29989557    | 4.02197303     | 4.10678818     | 4.61354017     | 1.33E-11  | -1.958196 | down      | PREDICTED: laccase-17-like [Sesamum indicum]                                              |
| c45322.graph_c0 | 7.08618777    | 7.57888727    | 6.54565614    | 4.74056904     | 7.05117244     | 7.5841122      | 2.2E-11   | -1.154444 | down      | PREDICTED: tetratricopeptide repeat protein 7A [Sesamum indicum]                          |
| c45326.graph_c0 | 1.7671061     | 1.96541733    | 2.46003475    | 0.04522148     | 0              | 0              | 2.414E-23 | -8.061023 | down      | conserved hypothetical protein [Ricinus communis]                                         |
| c45328.graph_c0 | 5.61503585    | 5.2279487     | 7.02648984    | 40.8413562     | 46.4731606     | 52.6815102     | 4.496E-31 | 1.946185  | up        | PREDICTED: RNA polymerase sigma factor sigA [Sesamum indicum]                             |
| c45331.graph_c0 | 138.570724    | 153.051674    | 120.498966    | 85.5626318     | 86.7977629     | 69.6943091     | 1.534E-28 | -1.781954 | down      | PREDICTED: ferredoxin--nitrite reductase, chloroplastic [Sesamum indicum]                 |
| c45334.graph_c0 | 549.462852    | 508.971473    | 599.222047    | 113.941114     | 96.5965453     | 83.583105      | 5.553E-81 | -3.508891 | down      | hypothetical protein MIMGU_mgv1a010052mg [Erythranthe guttata]                            |
| c45339.graph_c0 | 0.7027507     | 0.4689696     | 0.66893517    | 0              | 0              | 0              | 2.047E-19 | -Inf      | down      | -                                                                                         |
| c45340.graph_c0 | 12.746407     | 11.6195955    | 10.9720061    | 4.58850282     | 3.90861055     | 4.1828097      | 1.301E-48 | -2.492197 | down      | PREDICTED: B3 domain-containing transcription repressor VAL1 [Populus euphratica]         |
| c45342.graph_c0 | 62.5889661    | 61.4687891    | 59.2969945    | 28.8486628     | 23.2768367     | 21.2458406     | 1.62E-59  | -2.333189 | down      | PREDICTED: uncharacterized protein At4g26450 [Sesamum indicum]                            |
| c45348.graph_c0 | 22.3975059    | 18.5857152    | 20.6281244    | 13.630321      | 12.3564785     | 15.7234873     | 6.609E-24 | -1.580087 | down      | PREDICTED: uncharacterized protein LOC105163463 [Sesamum indicum]                         |
| c45349.graph_c0 | 7.64421738    | 6.17467656    | 6.56139036    | 49.0789372     | 61.7004973     | 61.2833643     | 1.555E-41 | 2.056959  | up        | PREDICTED: uncharacterized protein LOC105168326 [Sesamum indicum]                         |
| c45351.graph_c1 | 45.7970811    | 52.5144262    | 43.708727     | 54.5098738     | 28.1392338     | 19.9525        | 1.267E-06 | -1.468701 | down      | PREDICTED: cytochrome P450 / 10A1-like [Sesamum indicum]                                  |
| c45352.graph_c0 | 1.72126275    | 1.66357301    | 1.37289773    | 23.403328      | 25.6039738     | 23.3541763     | 4.501E-24 | 2.910677  | up        | PREDICTED: uncharacterized protein LOC105164615 [Sesamum indicum]                         |
| c45356.graph_c1 | 19.9560017    | 19.3257717    | 18.904714     | 7.3915864      | 9.27449283     | 8.41105207     | 3.889E-54 | -2.234833 | down      | PREDICTED: uncharacterized protein LOC105174921 [Sesamum indicum]                         |
| c45357.graph_c0 | 4.949178      | 4.6789042     | 4.71102939    | 3.54628212     | 2.5045706      | 2.70468044     | 4.876E-05 | -1.722398 | down      | PREDICTED: two-component response regulator-like APRR9 [Sesamum indicum]                  |
| c45364.graph_c0 | 0.41258749    | 0.18772756    | 0.28919523    | 2.72982712     | 2.81870764     | 4.3352748      | 8.734E-07 | 2.454075  | up        | PREDICTED: maf-like protein DDB_G0281937 [Sesamum indicum]                                |

| #ID             | 0 h-1<br>FPKM | 0 h-2<br>FPKM | 0 h-3<br>FPKM | 48 h-1<br>FPKM | 48 h-2<br>FPKM | 48 h-3<br>FPKM | FDR       | log2FC    | regulated | nr_annotation                                                                                     |
|-----------------|---------------|---------------|---------------|----------------|----------------|----------------|-----------|-----------|-----------|---------------------------------------------------------------------------------------------------|
| c45371.graph_c0 | 0.07905292    | 0.07913208    | 0.05079307    | 2.18486122     | 2.70036146     | 3.43453493     | 5.03E-11  | 4.296478  | up        | -                                                                                                 |
| c45372.graph_c0 | 72.9417579    | 74.0937109    | 66.8371382    | 30.5511638     | 29.0871402     | 25.396616      | 1.258E-60 | -2.345028 | down      | PREDICTED: uncharacterized RING finger protein C4G3.12c [Sesamum indicum]                         |
| c45377.graph_c0 | 15.2341062    | 17.0401115    | 15.4097033    | 73.649735      | 101.157045     | 105.471615     | 1.802E-12 | 1.532108  | up        | PREDICTED: transmembrane 9 superfamily member 1-like [Sesamum indicum]                            |
| c45381.graph_c0 | 31.5292555    | 32.5896406    | 28.2842264    | 29.3090146     | 28.4104612     | 28.0491667     | 5.507E-16 | -1.122911 | down      | PREDICTED: LOW QUALITY PROTEIN: uncharacterized protein LOC105165795 [Sesamum indicum]            |
| c45382.graph_c0 | 1684.32576    | 1714.14098    | 1965.92845    | 168.938782     | 164.343385     | 155.032413     | 1.9E-99   | -4.475611 | down      | Polyubiquitin [Triticum urartu]                                                                   |
| c45383.graph_c1 | 3.59887452    | 3.34515837    | 2.1471804     | 20.3272826     | 20.5725655     | 21.9152361     | 3.513E-14 | 1.775348  | up        | PREDICTED: GTP-binding protein OBGC, chloroplastic [Sesamum indicum]                              |
| c45387.graph_c0 | 0.67738532    | 1.0431748     | 0.80350796    | 11.9529872     | 11.2896723     | 11.1909734     | 1.953E-13 | 2.753819  | up        | PREDICTED: nuclei pyruvate 9 isoform A1 [Sesamum indicum]                                         |
| c45390.graph_c0 | 16.8134457    | 17.7510875    | 17.9940076    | 13.7476466     | 13.16742       | 12.8190665     | 2.943E-14 | -1.420435 | down      | General transcription factor IIE subunit 1 isoform 2 [Theobroma cacao]                            |
| c45393.graph_c1 | 13.3086455    | 12.0405483    | 13.4706482    | 91.2772593     | 96.5793224     | 102.462927     | 4.362E-41 | 1.883309  | up        | PREDICTED: aldehyde dehydrogenase family 7 member B4 isoform X1 [Sesamum indicum]                 |
| c45395.graph_c0 | 45.9040321    | 48.8606238    | 45.3026363    | 24.6320582     | 20.1167473     | 17.672184      | 6.375E-53 | -2.17793  | down      | PREDICTED: probable protein phosphatase 2C 4 [Sesamum indicum]                                    |
| c45397.graph_c0 | 0.47487361    | 0.50036749    | 0.32117441    | 7.75959419     | 12.7573965     | 13.2352178     | 7.121E-15 | 3.680114  | up        | PREDICTED: choline transporter-like protein 2 [Sesamum indicum]                                   |
| c45399.graph_c1 | 0.04074551    | 0.04078631    | 0.05235959    | 0.71321096     | 0.71579419     | 0.93521595     | 9.53E-07  | 3.119751  | up        | PREDICTED: pentatricopeptide repeat-containing protein At5g04780-like [Sesamum indicum]           |
| c45401.graph_c1 | 5.49494379    | 5.15231664    | 4.06690537    | 29.9252455     | 30.2765896     | 33.497946      | 2.71E-20  | 1.655322  | up        | PREDICTED: mitogen-activated protein kinase kinase 2 [Sesamum indicum]                            |
| c45405.graph_c0 | 0.82191259    | 0.68931902    | 0.91346181    | 10.9077655     | 10.9267341     | 10.3976252     | 2.771E-26 | 2.713685  | up        | PREDICTED: beta-amylase 7 [Sesamum indicum]                                                       |
| c45406.graph_c0 | 931.010988    | 935.738944    | 932.214349    | 28.2586091     | 30.3991658     | 29.3905701     | 5.14E-194 | -6.009011 | down      | 15.5 kDa oleosin [Sesamum indicum]                                                                |
| c45407.graph_c0 | 0.29075334    | 0.40746228    | 0.44835547    | 3.53576446     | 3.46194752     | 3.47977944     | 3.814E-05 | 2.171533  | up        | PREDICTED: root phototropism protein 5 [Populus euphratica]                                       |
| c45407.graph_c1 | 0.48980468    | 0.57681782    | 0.62941841    | 9.8211063      | 9.75751926     | 10.6990781     | 1.05E-23  | 3.137897  | up        | hypothetical protein MIMGU_mgv1a005061mg [Erythranthe guttata]                                    |
| c45418.graph_c0 | 18.0738016    | 17.6396023    | 16.9913238    | 19.5865576     | 16.9895913     | 16.2583367     | 1.196E-11 | -1.010108 | down      | PREDICTED: probable LRR receptor-like serine/threonine-protein kinase At4g08850 [Sesamum indicum] |
| c45419.graph_c0 | 15.9825759    | 14.1368123    | 14.0972554    | 9.72900217     | 13.4756232     | 13.2048618     | 8.461E-15 | -1.302605 | down      | PREDICTED: probable folate-biopterin transporter 7 [Sesamum indicum]                              |
| c45423.graph_c0 | 19.8316666    | 20.0199366    | 20.7010702    | 7.03297093     | 7.32742983     | 7.53360943     | 3.515E-58 | -2.486505 | down      | PREDICTED: aspartic proteinase nepenthesin-1 [Sesamum indicum]                                    |
| c45424.graph_c0 | 139.42402     | 138.631966    | 132.480324    | 19.6070983     | 25.343461      | 23.1938859     | 5.53E-125 | -3.611895 | down      | hypothetical protein F383_22559 [Gossypium arboreum]                                              |
| c45426.graph_c0 | 0.33770523    | 0.28170283    | 0.28930973    | 1.97040187     | 2.85644465     | 3.27581246     | 0.0001056 | 2.132516  | up        | hypothetical protein MIMGU_mgv1a010549mg [Erythranthe guttata]                                    |



| #ID             | 0 h-1<br>FPKM | 0 h-2<br>FPKM | 0 h-3<br>FPKM | 48 h-1<br>FPKM | 48 h-2<br>FPKM | 48 h-3<br>FPKM | FDR       | log2FC    | regulated | nr_annotation                                                                                 |
|-----------------|---------------|---------------|---------------|----------------|----------------|----------------|-----------|-----------|-----------|-----------------------------------------------------------------------------------------------|
| c45427.graph_c0 | 1.10820511    | 0.82828839    | 1.13926995    | 6.37073317     | 6.90765009     | 7.52184931     | 5.051E-14 | 1.736587  | up        | PREDICTED: alpha-N-acetylglucosaminidase [Sesamum indicum]                                    |
| c45430.graph_c0 | 0             | 0             | 0             | 24.3944783     | 56.2599644     | 19.4970363     | 5.13E-08  | Inf       | up        | predicted protein [Bathycoccus prasinus]                                                      |
| c45432.graph_c1 | 0.48075456    | 0.54139046    | 0.23167074    | 3.0449544      | 3.40171051     | 3.64535048     | 0.000249  | 1.995877  | up        | PREDICTED: charged multivesicular body protein 5-like [Nelumbo nucifera]                      |
| c45434.graph_c1 | 6.8795423     | 6.88643112    | 5.82668279    | 0.79223539     | 1.06817114     | 2.05069464     | 6.108E-16 | -3.350303 | down      | -                                                                                             |
| c45443.graph_c0 | 27.7890135    | 28.1340218    | 22.0693393    | 23.966321      | 26.9356602     | 27.3252045     | 2.397E-12 | -1.012945 | down      | PREDICTED: uncharacterized protein LOC105158089 [Sesamum indicum]                             |
| c45443.graph_c2 | 1.59609211    | 1.71751713    | 1.48700512    | 0.73521208     | 1.36301908     | 1.24295584     | 0.0005959 | -1.549369 | down      | PREDICTED: protein IQ-DOMAIN 1-like isoform X1 [Sesamum indicum]                              |
| c45444.graph_c0 | 2.29272264    | 0.8980507     | 1.47311968    | 0              | 0              | 0              | 3.292E-10 | -Inf      | down      | PREDICTED: malate dehydrogenase-like [Musa acuminata subsp. malaccensis]                      |
| c45449.graph_c0 | 447.950348    | 445.741815    | 402.582816    | 107.570628     | 79.2555097     | 62.6971976     | 2.018E-93 | -3.385283 | down      | PREDICTED: putative DNA-binding protein ESCAROLA [Sesamum indicum]                            |
| c45449.graph_c1 | 13.869955     | 16.3972981    | 14.7504341    | 1.10154372     | 0.2333904      | 0.39205879     | 6.607E-40 | -5.694687 | down      | -                                                                                             |
| c45449.graph_c2 | 1.92429955    | 1.85353865    | 1.58632524    | 7.89393398     | 8.46897094     | 6.72634893     | 0.0007226 | 1.090604  | up        | PREDICTED: protein IQ-DOMAIN 1-like [Sesamum indicum]                                         |
| c45449.graph_c4 | 23.8629523    | 24.3710403    | 19.890706     | 0.89124763     | 0.62944586     | 0.13217113     | 1.075E-48 | -6.364416 | down      | -                                                                                             |
| c45455.graph_c1 | 1.45457039    | 1.19908099    | 1.15449386    | 0.23647855     | 0.58454748     | 0.73646017     | 3.586E-06 | -2.32084  | down      | -                                                                                             |
| c45458.graph_c0 | 23.5045425    | 20.2817604    | 19.5275949    | 19.4913714     | 20.2870147     | 22.1032194     | 3.922E-12 | -1.05039  | down      | PREDICTED: DUF21 domain-containing protein At2g14520-like [Sesamum indicum]                   |
| c45458.graph_c1 | 6.16025705    | 5.6766734     | 5.97285346    | 34.09236       | 32.2749789     | 31.7206778     | 7.405E-21 | 1.445232  | up        | PREDICTED: protein IQ-DOMAIN 32 [Sesamum indicum]                                             |
| c45461.graph_c0 | 0.16278119    | 0.10184012    | 0.20918028    | 2.38068884     | 2.80007254     | 3.2525426      | 1.153E-11 | 3.127477  | up        | PREDICTED: putative pentatricopeptide repeat-containing protein At4g17915 [Sesamum indicum]   |
| c45462.graph_c0 | 2.43419505    | 0.82470639    | 0.86622563    | 0              | 0              | 0              | 3.637E-06 | -Inf      | down      | PREDICTED: serine hydroxymethyltransferase, mitochondrial [Musa acuminata subsp. malaccensis] |
| c45467.graph_c1 | 0.19285497    | 0             | 0.24782627    | 30.4705038     | 30.3034895     | 34.3055756     | 1.057E-43 | 6.725805  | up        | hypothetical protein MIMGU_mgv1a008026mg [Erythranthe guttata]                                |
| c45473.graph_c0 | 5.55256967    | 4.16859729    | 4.21179242    | 142.129672     | 137.886873     | 138.509015     | 1.27E-133 | 3.893884  | up        | PREDICTED: peroxisomal (S)-2-hydroxy-acid oxidase GLO5 [Musa acuminata subsp. malaccensis]    |
| c45474.graph_c0 | 0             | 0             | 0             | 1.64236916     | 2.14140429     | 3.93445825     | 2.745E-06 | Inf       | up        | -                                                                                             |
| c45476.graph_c1 | 2.13410973    | 2.00391285    | 1.71097604    | 8.43848958     | 9.69527157     | 8.87862817     | 2.766E-12 | 1.190055  | up        | PREDICTED: nuclear pore complex protein NUP205 isoform X2 [Sesamum indicum]                   |
| c45478.graph_c0 | 73.9427566    | 77.6110509    | 66.1571566    | 72.9573367     | 72.8666969     | 69.0986448     | 1.501E-13 | -1.034208 | down      | PREDICTED: ankyrin repeat-containing protein At5g02620 [Sesamum indicum]                      |
| c45479.graph_c0 | 3.84863039    | 3.91778055    | 4.06548572    | 16.6463354     | 20.9134412     | 23.1000056     | 6.309E-12 | 1.33517   | up        | PREDICTED: reticulin-like protein B17 [Sesamum indicum]                                       |
| c45482.graph_c0 | 0             | 0             | 0             | 2.25382557     | 2.35034779     | 2.7574806      | 7.702E-15 | Inf       | up        | PREDICTED: myosin-12 [Sesamum indicum]                                                        |
| c45487.graph_c2 | 2.27426744    | 2.07858436    | 2.28719246    | 0.18219161     | 0              | 0.162113       | 5.521E-15 | -5.267551 | down      | unnamed protein product [Coffea canephora]                                                    |

| #ID             | 0 h-1<br>FPKM | 0 h-2<br>FPKM | 0 h-3<br>FPKM | 48 h-1<br>FPKM | 48 h-2<br>FPKM | 48 h-3<br>FPKM | FDR       | log2FC    | regulated | nr_annotation                                                                                        |
|-----------------|---------------|---------------|---------------|----------------|----------------|----------------|-----------|-----------|-----------|------------------------------------------------------------------------------------------------------|
| c45492.graph_c0 | 20.0347034    | 18.8857271    | 20.0805564    | 145.854907     | 137.643289     | 173.130984     | 3.379E-28 | 1.933783  | up        | PREDICTED: VIN3-like protein 2 [Sesamum indicum]                                                     |
| c45497.graph_c0 | 4.36330373    | 3.47796177    | 3.11501002    | 24.0813399     | 25.7478401     | 20.5001238     | 4.331E-15 | 1.668111  | up        | PREDICTED: serine carboxypeptidase-like 31 [Sesamum indicum]                                         |
| c45501.graph_c0 | 12.3552923    | 12.8230627    | 12.4923995    | 11.9339789     | 9.81496024     | 8.04750625     | 8.888E-17 | -1.350183 | down      | PREDICTED: probable serine/threonine-protein kinase At1g18390 [Sesamum indicum]                      |
| c45502.graph_c0 | 14.1513631    | 13.5775303    | 13.4272092    | 7.23193334     | 8.75583595     | 7.99624053     | 2.411E-31 | -1.798997 | down      | PREDICTED: uncharacterized protein LOC105163310 [Sesamum indicum]                                    |
| c45503.graph_c0 | 0             | 0             | 0.11497538    | 28.1902635     | 63.8324717     | 9.3879867      | 8.568E-05 | 8.726844  | up        | 40s ribosomal protein s22 [Lichtheimia corymbifera JMRC:FSU:9682]                                    |
| c45509.graph_c0 | 27.0874232    | 26.084288     | 24.1073798    | 108.783533     | 116.612728     | 117.312084     | 2.504E-15 | 1.131153  | up        | hypothetical protein glysoja_038462 [Glycine soja]                                                   |
| c45510.graph_c0 | 28.3430575    | 30.8218336    | 33.9205475    | 4.78212204     | 5.78569186     | 6.55189223     | 1.314E-64 | -3.466427 | down      | PREDICTED: 26.5 kDa heat shock protein, mitochondrial [Sesamum indicum]                              |
| c45512.graph_c0 | 3.51025659    | 2.83804627    | 2.77588843    | 2.23883815     | 2.70119109     | 2.54546714     | 0.0023233 | -1.304344 | down      | hypothetical protein MIMGU_mgv1a000874mg [Erythranthe guttata]                                       |
| c45515.graph_c0 | 20.157587     | 20.672009     | 19.7516091    | 14.812878      | 15.1477169     | 14.3242371     | 2.096E-23 | -1.46916  | down      | PREDICTED: V-type proton ATPase subunit a3-like [Sesamum indicum]                                    |
| c45519.graph_c0 | 1.17599104    | 1.37336338    | 0.37779876    | 3.38562389     | 5.92994121     | 5.34218047     | 0.0073797 | 1.307241  | up        | predicted protein [Arabidopsis lyrata subsp. lyrata]                                                 |
| c45522.graph_c1 | 41.8510652    | 41.5023623    | 49.743621     | 4.92509329     | 7.04558205     | 7.82099888     | 9.671E-56 | -3.776068 | down      | PREDICTED: G-type lectin 5-receptor-like serine/threonine-protein kinase At4g27290 [Sesamum indicum] |
| c45525.graph_c0 | 31.5596968    | 24.7218889    | 26.0970026    | 11.6519947     | 12.6164532     | 12.8535483     | 6.82E-30  | -2.167862 | down      | PREDICTED: MALE EXUCC family protein 5 [Sesamum indicum]                                             |
| c45528.graph_c0 | 0.47557095    | 0.38348244    | 0.54322444    | 14.190446      | 12.1063812     | 10.9805708     | 1.87E-31  | 3.71665   | up        | PREDICTED: uncharacterized protein LOC105168379 [Sesamum indicum]                                    |
| c45530.graph_c0 | 1.90536193    | 1.21371718    | 2.00328997    | 71.490361      | 37.6986323     | 47.8507604     | 6.564E-08 | 3.929542  | up        | hypothetical protein AMTR_s00028p00129850 [Amborella trichopoda]                                     |
| c45532.graph_c0 | 9.32956503    | 8.22229871    | 8.81789372    | 2.3978815      | 2.9361501      | 2.77093577     | 9.766E-31 | -2.722668 | down      | PREDICTED: uncharacterized protein LOC105175116 [Sesamum indicum]                                    |
| c45533.graph_c0 | 39.4281412    | 40.4786158    | 33.0831234    | 13.0264574     | 15.0226126     | 12.8168201     | 6.818E-66 | -2.484274 | down      | PREDICTED: uncharacterized protein LOC105157181 [Sesamum indicum]                                    |
| c45535.graph_c0 | 8.54727045    | 9.18625877    | 6.62868743    | 7.65326996     | 8.48821784     | 7.91612425     | 6.605E-08 | -1.034142 | down      | PREDICTED: polypyrimidine tract-binding protein homolog 1 isoform X1 [Sesamum indicum]               |
| c45541.graph_c0 | 0.11651871    | 0.19439231    | 0.14973116    | 205.099821     | 255.336224     | 243.43491      | 0         | 9.555873  | up        | PREDICTED: WAT1-related protein At1g09380 [Sesamum indicum]                                          |
| c45543.graph_c0 | 1.50325583    | 0.77832471    | 0.46628286    | 17.8603999     | 18.9715188     | 17.8467169     | 2.18E-24  | 3.305812  | up        | PREDICTED: protein SCARECROW [Sesamum indicum]                                                       |
| c45543.graph_c1 | 69.7189926    | 72.7736629    | 75.1767135    | 14.1279141     | 25.9147576     | 22.930313      | 3.9E-54   | -2.817232 | down      | -                                                                                                    |
| c45543.graph_c2 | 146.990011    | 142.961081    | 135.276899    | 130.715073     | 113.453705     | 100.538145     | 2.115E-20 | -1.315704 | down      | PREDICTED: E3 ubiquitin-protein ligase UPL5 [Sesamum indicum]                                        |

| #ID             | 0 h-1<br>FPKM | 0 h-2<br>FPKM | 0 h-3<br>FPKM | 48 h-1<br>FPKM | 48 h-2<br>FPKM | 48 h-3<br>FPKM | FDR       | log2FC    | regulated | nr_annotation                                                                                 |
|-----------------|---------------|---------------|---------------|----------------|----------------|----------------|-----------|-----------|-----------|-----------------------------------------------------------------------------------------------|
| c45543.graph_c5 | 31.7486814    | 31.3963133    | 32.055817     | 203.328457     | 205.459174     | 214.267456     | 1.641E-33 | 1.692223  | up        | PREDICTED: ATP synthase subunit O, mitochondrial-like [Sesamum indicum]                       |
| c45544.graph_c0 | 25.022116     | 23.3852742    | 25.6524122    | 18.9732935     | 17.4379204     | 17.0767446     | 1.113E-20 | -1.4856   | down      | PREDICTED: F-box protein FBW2 [Sesamum indicum]                                               |
| c45547.graph_c1 | 0             | 0             | 0.29692782    | 6.17329538     | 6.99088258     | 5.4929611      | 8.004E-10 | 4.922946  | up        | -                                                                                             |
| c45550.graph_c0 | 55.5144229    | 56.6075405    | 62.3876542    | 39.5703313     | 42.8910868     | 44.5895647     | 1.44E-24  | -1.478365 | down      | PREDICTED: uncharacterized protein LOC104114664 [Nicotiana tomentosiformis]                   |
| c45551.graph_c0 | 0.20950179    | 0.29958796    | 0.23075837    | 2.01278429     | 1.54810887     | 1.32482221     | 0.001141  | 1.712916  | up        | hypothetical protein CICLE_V100158 / mg [Citrus Clementina]                                   |
| c45552.graph_c0 | 2.02343353    | 1.56060009    | 1.87554847    | 10.3901712     | 10.8128831     | 10.6862616     | 2.041E-08 | 1.528019  | up        | PREDICTED: probable anion transporter 6, chloroplastic isoform X2 [Sesamum indicum]           |
| c45554.graph_c0 | 48.8193415    | 51.1306446    | 46.7025634    | 28.5678105     | 32.9111397     | 24.8265921     | 3.904E-27 | -1.782382 | down      | PREDICTED: protein polybromo-1-like [Sesamum indicum]                                         |
| c45554.graph_c1 | 58.8663967    | 59.2507585    | 57.8107582    | 40.6621541     | 37.2191774     | 34.0490321     | 2.952E-32 | -1.667127 | down      | PREDICTED: vacuolar protein 8 [Sesamum indicum]                                               |
| c45555.graph_c0 | 17.85357      | 16.570461     | 14.635761     | 10.9967581     | 9.88057481     | 9.44840742     | 5.381E-24 | -1.707092 | down      | PREDICTED: abscisic acid 8-epoxide hydroxylase 3-like [Solanum lycopersicum]                  |
| c45559.graph_c0 | 6.60479391    | 6.89475365    | 6.09275627    | 4.04202376     | 4.71944613     | 5.72357127     | 1.038E-12 | -1.45645  | down      | PREDICTED: uncharacterized protein LOC105170176 [Sesamum indicum]                             |
| c45560.graph_c0 | 7.42109233    | 6.20120216    | 7.46326757    | 2.85361849     | 2.64517992     | 3.22681431     | 2.96E-11  | -2.291242 | down      | PREDICTED: uncharacterized protein LOC105171076 [Sesamum indicum]                             |
| c45565.graph_c0 | 48.0017798    | 43.8730288    | 46.695901     | 30.3896372     | 33.8936269     | 32.8579981     | 1.007E-26 | -1.531771 | down      | hypothetical protein MIMGU_mgv1a003857mg [Erythranthe guttata]                                |
| c45566.graph_c0 | 74.0480001    | 73.2147613    | 76.4440263    | 38.7107143     | 25.5271422     | 25.4193118     | 2.076E-57 | -2.328364 | down      | hypothetical protein MIMGU_mgv1a020815mg [Erythranthe guttata]                                |
| c45569.graph_c0 | 20.3805894    | 19.7634663    | 29.4635973    | 2.05361716     | 0.6215881      | 0.26104231     | 3.735E-20 | -5.558075 | down      | -                                                                                             |
| c45569.graph_c1 | 0             | 0.0523539     | 0.06720954    | 1.83097606     | 1.63342915     | 1.80068533     | 3.231E-09 | 4.431365  | up        | -                                                                                             |
| c45569.graph_c2 | 4.25670538    | 4.26096783    | 3.87460809    | 2.28757354     | 1.73100485     | 2.18085984     | 6.26E-05  | -2.012098 | down      | PREDICTED: heat stress transcription factor C-1-like [Sesamum indicum]                        |
| c45569.graph_c3 | 74.1422938    | 70.1946862    | 68.5655201    | 336.390861     | 328.654995     | 318.596859     | 3.222E-17 | 1.191867  | up        | PREDICTED: putative glycerol-3-phosphate transporter 1 [Eucalyptus grandis]                   |
| c45573.graph_c0 | 18.3785319    | 19.2096512    | 16.0293046    | 16.1835243     | 17.6007073     | 16.0336163     | 5.766E-16 | -1.12276  | down      | PREDICTED: sister chromatid cohesion 1 protein 4-like isoform X3 [Sesamum indicum]            |
| c45574.graph_c0 | 1.04175747    | 0.82704878    | 0.73859288    | 4.07059987     | 5.64456441     | 4.65264435     | 0.0003681 | 1.442823  | up        | PREDICTED: probable lipid-A-disaccharide synthase, mitochondrial isoform X1 [Sesamum indicum] |
| c45580.graph_c1 | 1.45148261    | 0.72646802    | 1.17802902    | 31.8816739     | 32.2090499     | 32.3759799     | 1.747E-65 | 3.82773   | up        | PREDICTED: ABC transporter G family member 15-like isoform X2 [Sesamum indicum]               |
| c45582.graph_c0 | 10.7400739    | 11.6225173    | 10.8173294    | 10.863846      | 10.1986804     | 9.10146139     | 1.048E-09 | -1.152535 | down      | PREDICTED: aspartic proteinase-like protein 2 [Sesamum indicum]                               |
| c45584.graph_c1 | 13.0360801    | 10.9090758    | 13.5355183    | 11.865571      | 11.7558741     | 12.4814203     | 4.448E-07 | -1.072836 | down      | PREDICTED: uncharacterized protein At5g43822 [Sesamum indicum]                                |

| #ID             | 0 h-1<br>FPKM | 0 h-2<br>FPKM | 0 h-3<br>FPKM | 48 h-1<br>FPKM | 48 h-2<br>FPKM | 48 h-3<br>FPKM | FDR       | log2FC    | regulated | nr_annotation                                                                                          |
|-----------------|---------------|---------------|---------------|----------------|----------------|----------------|-----------|-----------|-----------|--------------------------------------------------------------------------------------------------------|
| c45588.graph_c0 | 9.91802783    | 11.5826191    | 10.0898379    | 52.049032      | 48.8593658     | 49.4101221     | 1.521E-12 | 1.234632  | up        | PREDICTED: probable receptor-like protein kinase At5g56460 [Sesamum indicum]                           |
| c45590.graph_c0 | 1.87274859    | 1.79311848    | 2.5635054     | 21.341188      | 21.1779925     | 20.1239442     | 1.023E-22 | 2.309346  | up        | hypothetical protein MIMGU_mgv1a014871mg [Erythranthe guttata]                                         |
| c45591.graph_c0 | 0             | 0             | 0             | 2.86643917     | 4.17538651     | 1.99260964     | 8.523E-08 | Inf       | up        | hypothetical protein H632_c597p1 [Helicosporidium sp. ATCC 50920]                                      |
| c45594.graph_c0 | 0.13529975    | 0.47402332    | 0.43466384    | 7.85275819     | 9.57350429     | 4.10367412     | 1.138E-05 | 3.344402  | up        | hypothetical protein MIMGU_mgv1a011617mg [Erythranthe guttata]                                         |
| c45596.graph_c0 | 46.0805474    | 47.9573992    | 43.8239507    | 36.6709498     | 29.8187909     | 26.4417268     | 1.73E-29  | -1.580574 | down      | PREDICTED: scarecrow-like protein 15 [Sesamum indicum]                                                 |
| c45602.graph_c0 | 1.74774985    | 0.78899018    | 2.28996556    | 6.53527883     | 7.09056581     | 9.12991226     | 0.0003196 | 1.21021   | up        | PREDICTED: probable alpha-mannosidase I MNS5 isoform X1 [Sesamum indicum]                              |
| c45604.graph_c0 | 6.03702796    | 6.08670543    | 5.09719577    | 453.630241     | 461.635418     | 429.685503     | 1.3E-205  | 5.271864  | up        | PREDICTED: glucose-6-phosphate 1-dehydrogenase, chloroplastic-like [Sesamum indicum]                   |
| c45606.graph_c0 | 1.02930215    | 1.03033284    | 1.20767714    | 0.12368612     | 0.48044498     | 0.14674022     | 5.104E-09 | -3.158081 | down      | hypothetical protein VITISV_002159 [Vitis vinifera]                                                    |
| c45611.graph_c0 | 12.4630261    | 12.1824571    | 14.2419554    | 62.841404      | 62.0013216     | 54.1674601     | 4.834E-15 | 1.18496   | up        | PREDICTED: AP-4 complex subunit mu [Sesamum indicum]                                                   |
| c45616.graph_c0 | 2.02221232    | 2.14331003    | 3.21006357    | 1.09587876     | 1.33509326     | 1.02386164     | 8.807E-06 | -2.118572 | down      | PREDICTED: Ia-related protein 6C-like isoform X1 [Sesamum indicum]                                     |
| c45617.graph_c0 | 20.7012453    | 19.3619831    | 17.5508348    | 17.8855548     | 15.8768827     | 12.3388348     | 5.643E-17 | -1.333188 | down      | PREDICTED: uncharacterized protein LOC105158248 [Sesamum indicum]                                      |
| c45622.graph_c0 | 0.24131189    | 0.56362491    | 0.10336511    | 2.18607052     | 2.43363308     | 3.2309311      | 9.444E-05 | 2.099088  | up        | PREDICTED: LOW QUALITY PROTEIN: beta-adaptin-like protein A [Sesamum indicum]                          |
| c45623.graph_c0 | 2.73168274    | 2.11783363    | 1.27335155    | 0              | 0              | 0              | 1.449E-18 | -Inf      | down      | --                                                                                                     |
| c45625.graph_c0 | 19.6003543    | 20.1151225    | 20.7377519    | 13.8039219     | 12.6925445     | 12.2319618     | 6.012E-29 | -1.658412 | down      | PREDICTED: protein VACUOLELESS1 [Sesamum indicum]                                                      |
| c45627.graph_c0 | 2.71028197    | 1.84096151    | 1.74140982    | 0.35669836     | 0.66128766     | 0.39673507     | 3.596E-09 | -3.175322 | down      | -                                                                                                      |
| c45628.graph_c0 | 26.5138553    | 27.8998425    | 21.3986359    | 13.6760292     | 15.9970588     | 16.2493949     | 9.339E-24 | -1.741291 | down      | PREDICTED: E3 ubiquitin-protein ligase UPL2-like [Sesamum indicum]                                     |
| c45632.graph_c0 | 0             | 0.04848218    | 0.1867176     | 2.0079121      | 2.74164633     | 2.66009074     | 1.598E-09 | 3.93107   | up        | PREDICTED: probable protein phosphatase 2C 14 [Sesamum indicum]                                        |
| c45632.graph_c1 | 0.34123575    | 0.38176303    | 0.23214783    | 4.19774582     | 3.93765437     | 4.57429894     | 1.29E-12  | 2.720921  | up        | PREDICTED: protein-tyrosine-phosphatase MKP1-like isoform X1 [Sesamum indicum]                         |
| c45633.graph_c0 | 0             | 0             | 0             | 2.58974852     | 2.28627044     | 2.04830458     | 2.144E-11 | Inf       | up        | -                                                                                                      |
| c45637.graph_c0 | 56.9376088    | 54.8948213    | 57.735979     | 58.8635705     | 55.1515151     | 53.6924423     | 3.914E-13 | -1.032138 | down      | PREDICTED: activator of 90 kDa heat shock protein ATPase homolog [Sesamum indicum]                     |
| c45639.graph_c0 | 15.0454639    | 15.0247564    | 14.6956897    | 60.0856873     | 64.874252      | 60.9634745     | 1.983E-12 | 1.036063  | up        | PREDICTED: dolichyl-diphosphooligosaccharide--protein glycosyltransferase subunit 1A [Sesamum indicum] |
| c45641.graph_c0 | 26.0770213    | 29.771682     | 27.8948148    | 16.232333      | 14.4447984     | 12.8257679     | 6.076E-15 | -1.959223 | down      | PREDICTED: P-DOX protein PFL-A15-like [Nicotiana glauca]                                               |

| #ID             | 0 h-1<br>FPKM | 0 h-2<br>FPKM | 0 h-3<br>FPKM | 48 h-1<br>FPKM | 48 h-2<br>FPKM | 48 h-3<br>FPKM | FDR       | log2FC    | regulated | nr_annotation                                                                                                  |
|-----------------|---------------|---------------|---------------|----------------|----------------|----------------|-----------|-----------|-----------|----------------------------------------------------------------------------------------------------------------|
| c45642.graph_c0 | 95.6197768    | 98.4392499    | 91.0526769    | 45.729423      | 49.464104      | 49.5216527     | 8.117E-44 | -1.996596 | down      | PREDICTED: uncharacterized protein LOC105169167 [Sesamum indicum]                                              |
| c45643.graph_c0 | 0             | 0             | 0             | 11.5908989     | 34.7473873     | 5.48591071     | 0.0008552 | Inf       | up        | hypothetical protein SELMODRAFT_171412 [Selaginella moellendorffii]                                            |
| c45653.graph_c0 | 3.32709187    | 2.65350812    | 2.50269939    | 1.66962586     | 1.66316817     | 2.01778653     | 2.738E-07 | -1.681553 | down      | PREDICTED: integrator complex subunit 9 homolog isoform X2 [Sesamum indicum]                                   |
| c45655.graph_c0 | 205.455409    | 191.938992    | 199.265751    | 120.464539     | 135.091124     | 136.809113     | 2.553E-27 | -1.624325 | down      | hypothetical protein MIMGU_mgv1a018120mg, partial [Erythranthe guttata]                                        |
| c45660.graph_c0 | 30.8114009    | 29.6885536    | 28.3871262    | 23.8905158     | 25.6090644     | 22.5803348     | 1.505E-18 | -1.319452 | down      | PREDICTED: uncharacterized protein LOC105168018 [Sesamum indicum]                                              |
| c45661.graph_c0 | 0.12640267    | 0.06326462    | 0.08121622    | 10.3058592     | 9.93088766     | 12.019555      | 1.718E-60 | 5.880279  | up        | PREDICTED: chaperonin 60 subunit beta 4, chloroplastic isoform X1 [Sesamum indicum]                            |
| c45662.graph_c1 | 399.967544    | 413.856287    | 388.466041    | 227.451003     | 226.672128     | 209.564263     | 8.91E-29  | -1.873506 | down      | PREDICTED: glucan endo-1,3-beta-glucosidase-like [Sesamum indicum]                                             |
| c45663.graph_c0 | 31.8507435    | 34.345873     | 32.695842     | 20.3604368     | 17.4458495     | 16.6132214     | 4.861E-39 | -1.875667 | down      | PREDICTED: uncharacterized protein LOC105167456 isoform X2 [Sesamum indicum]                                   |
| c45665.graph_c0 | 3.44833649    | 3.29488996    | 2.25590854    | 3.1768325      | 2.41701852     | 2.41556624     | 0.0001732 | -1.175834 | down      | hypothetical protein MIMGU_mgv1a015231mg [Erythranthe guttata]                                                 |
| c45667.graph_c0 | 21.9553657    | 21.9371727    | 19.3935674    | 14.8095052     | 17.8042289     | 16.63216       | 9.194E-22 | -1.380963 | down      | hypothetical protein MIMGU_mgv1a002103mg [Erythranthe guttata]                                                 |
| c45668.graph_c0 | 128.196915    | 135.435528    | 121.037185    | 925.912411     | 863.372926     | 823.073666     | 2.205E-30 | 1.748829  | up        | triosephosphate isomerase, putative [Ricinus communis]                                                         |
| c45672.graph_c0 | 1.36223194    | 1.16473826    | 1.45876831    | 8.88941981     | 9.55575154     | 8.77051945     | 3.241E-10 | 1.751981  | up        | PREDICTED: alpha-1,3-mannosyl-glycoprotein 2-beta-N-acetylglucosaminyltransferase isoform X1 [Sesamum indicum] |
| c45673.graph_c0 | 66.7131895    | 59.4534997    | 68.8247622    | 46.2434764     | 26.7631506     | 18.749325      | 2.505E-20 | -2.091419 | down      | PREDICTED: probable galactinol--sucrose galactosyltransferase 2-like isoform X1 [Citrus sinensis]              |
| c45673.graph_c1 | 0             | 0.16789978    | 0             | 12.8256161     | 11.4590718     | 15.2620401     | 3.122E-15 | 6.873867  | up        | hypothetical protein MIMGU_mgv1a001872mg [Erythranthe guttata]                                                 |
| c45681.graph_c1 | 2.10616574    | 2.55506145    | 2.04332269    | 25.429983      | 28.4237926     | 30.6539579     | 5.722E-63 | 2.636866  | up        | PREDICTED: uncharacterized protein LOC105164103 [Sesamum indicum]                                              |
| c45682.graph_c0 | 21.3627598    | 23.4535854    | 21.6121612    | 10.6382528     | 13.2149122     | 14.8552828     | 7.6E-35   | -1.801194 | down      | PREDICTED: GTPase-activating protein gyp7 isoform X3 [Sesamum indicum]                                         |
| c45686.graph_c0 | 6.80864701    | 7.10318894    | 6.02529929    | 5.04784634     | 6.53982871     | 6.98030011     | 1.783E-10 | -1.123833 | down      | PREDICTED: F-box/WD-40 repeat-containing protein At5g21040-like [Sesamum indicum]                              |
| c45690.graph_c0 | 0.63286126    | 0.72087359    | 0.4767338     | 10.5348044     | 8.96661534     | 6.33268546     | 7.183E-09 | 2.810835  | up        | PREDICTED: U-box domain-containing protein 35 [Sesamum indicum]                                                |
| c45693.graph_c1 | 20.7942628    | 21.3227701    | 17.4785544    | 9.85461472     | 11.3847485     | 12.2457712     | 1.252E-25 | -1.850432 | down      | PREDICTED: abl interactor 2-like isoform X1 [Sesamum indicum]                                                  |

| #ID             | 0 h-1<br>FPKM | 0 h-2<br>FPKM | 0 h-3<br>FPKM | 48 h-1<br>FPKM | 48 h-2<br>FPKM | 48 h-3<br>FPKM | FDR       | log2FC    | regulated | nr_annotation                                                                                         |
|-----------------|---------------|---------------|---------------|----------------|----------------|----------------|-----------|-----------|-----------|-------------------------------------------------------------------------------------------------------|
| c45697.graph_c0 | 13.8478987    | 13.023352     | 12.0547438    | 5.812933       | 5.12266531     | 6.11065277     | 2.481E-35 | -2.206421 | down      | PREDICTED: uncharacterized protein LOC105177954 [Sesamum indicum]                                     |
| c45699.graph_c0 | 0             | 0             | 0             | 23.9949124     | 50.2382588     | 12.9112995     | 4.248E-07 | Inf       | up        | 60s ribosomal protein l9 [Pfiesteria piscicida]                                                       |
| c45700.graph_c0 | 4.27360591    | 4.97835772    | 2.8903962     | 18.2120789     | 15.7811473     | 16.4508389     | 1.561E-06 | 1.044135  | up        | hypothetical protein MIMGU_mgv1a010620mg [Erythranthe guttata]                                        |
| c45702.graph_c0 | 43.5171089    | 44.6480028    | 47.3716316    | 23.2664232     | 21.0037674     | 20.9805805     | 2.446E-37 | -2.070841 | down      | PREDICTED: uncharacterized protein LOC105178309 [Sesamum indicum]                                     |
| c45702.graph_c1 | 12.4147356    | 12.8182317    | 14.0568655    | 1.03975129     | 1.31331549     | 1.45891316     | 7.174E-67 | -4.389284 | down      | PREDICTED: uncharacterized protein LOC105162982 [Sesamum indicum]                                     |
| c45711.graph_c0 | 0.19728714    | 0.19748469    | 0.38028268    | 4.36209077     | 3.56210272     | 4.20480898     | 1.037E-06 | 2.945489  | up        | hypothetical protein VITISV_029424 [Vitis vinifera]                                                   |
| c45712.graph_c0 | 98.326615     | 99.7086369    | 95.5472928    | 56.343768      | 58.5467492     | 65.3376511     | 4.649E-31 | -1.72258  | down      | PREDICTED: plastidial pyruvate kinase 2-like [Sesamum indicum]                                        |
| c45713.graph_c0 | 1.42197674    | 1.49457067    | 2.13184582    | 18.2747473     | 17.0237405     | 18.2812131     | 3.425E-33 | 2.386752  | up        | PREDICTED: probable sodium/metabolite cotransporter BASS2, chloroplastic isoform X2 [Sesamum indicum] |
| c45717.graph_c0 | 10.7116447    | 10.1326404    | 10.8742611    | 45.2953398     | 51.2257318     | 52.2453049     | 6.434E-13 | 1.209373  | up        | chloroplast monodehydroascorbate reductase [Avicennia marina]                                         |
| c45718.graph_c1 | 10.5754309    | 9.94873506    | 9.97649331    | 6.37027708     | 6.29978437     | 6.33508533     | 2.221E-25 | -1.699287 | down      | PREDICTED: DNA mismatch repair protein MSH3 isoform X1 [Sesamum indicum]                              |
| c45720.graph_c0 | 1.18509867    | 1.54217098    | 0.91373923    | 7.8062999      | 10.2649965     | 7.99032719     | 1.372E-09 | 1.82223   | up        | PREDICTED: serine/threonine-protein kinase BLUS1-like isoform X4 [Sesamum indicum]                    |
| c45721.graph_c0 | 9.089999      | 7.71155503    | 9.00910634    | 4.71514837     | 6.34797512     | 6.70844675     | 1.313E-15 | -1.562161 | down      | hypothetical protein MIMGU_mgv1a008794mg [Erythranthe guttata]                                        |
| c45722.graph_c0 | 1.97190877    | 2.20163911    | 1.31572082    | 18.5508013     | 19.6893347     | 15.8846818     | 8.268E-20 | 2.289018  | up        | hypothetical protein MIMGU_mgv1a007079mg [Erythranthe guttata]                                        |
| c45729.graph_c0 | 9.08714367    | 3.88254277    | 4.12979076    | 0              | 0              | 0              | 1.102E-09 | -Inf      | down      | chaperone [Agave tequilana]                                                                           |
| c45742.graph_c0 | 0.60578347    | 0.92081455    | 0.86495083    | 11.2650944     | 13.0945559     | 18.5206946     | 9.555E-13 | 3.139427  | up        | PREDICTED: DNA replication licensing factor MCM5 [Sesamum indicum]                                    |
| c45746.graph_c0 | 1.89722416    | 1.76347223    | 1.69789854    | 24.4074299     | 30.6180508     | 30.326857      | 2.111E-47 | 2.972858  | up        | PREDICTED: LOW QUALITY PROTEIN: uncharacterized protein LOC105161466 [Sesamum indicum]                |
| c45747.graph_c0 | 7.71565169    | 6.6859091     | 6.75792911    | 29.1399261     | 34.3918209     | 30.8373306     | 8.338E-11 | 1.138149  | up        | hypothetical protein CISIN_1g034493mg [Citrus sinensis]                                               |
| c45752.graph_c0 | 0             | 0             | 0             | 23.2272088     | 52.4981472     | 16.0496397     | 4.27E-08  | Inf       | up        | PREDICTED: 60S ribosomal protein L6-3-like isoform X2 [Cicer arietinum]                               |
| c45754.graph_c1 | 5.05019401    | 4.27204311    | 3.19914752    | 2.75222339     | 3.60984862     | 3.73167516     | 0.0006341 | -1.329452 | down      | PREDICTED: uncharacterized protein LOC105170987 isoform X2 [Sesamum indicum]                          |
| c45758.graph_c0 | 1.19273995    | 0.93126875    | 1.103557      | 0.54941492     | 0.69844618     | 0.95817754     | 0.000433  | -1.573129 | down      | PREDICTED: pentatricopeptide repeat-containing protein At1g74630 [Sesamum indicum]                    |
| c45764.graph_c0 | 1.22255414    | 0.99834549    | 1.36431593    | 4.38662891     | 5.52628277     | 6.69872831     | 0.0005339 | 1.186977  | up        | PREDICTED: tRNA pseudouridine(38/39) synthase isoform X3 [Sesamum indicum]                            |

| #ID             | 0 h-1<br>FPKM | 0 h-2<br>FPKM | 0 h-3<br>FPKM | 48 h-1<br>FPKM | 48 h-2<br>FPKM | 48 h-3<br>FPKM | FDR       | log2FC    | regulated | nr_annotation                                                                                                                                         |
|-----------------|---------------|---------------|---------------|----------------|----------------|----------------|-----------|-----------|-----------|-------------------------------------------------------------------------------------------------------------------------------------------------------|
| c45766.graph_c0 | 60.1959704    | 53.9878771    | 53.1341736    | 30.3723773     | 35.1717402     | 35.4799569     | 5.153E-35 | -1.747194 | down      | PREDICTED: uncharacterized protein DDB_G0286299-like [Sesamum indicum]                                                                                |
| c45770.graph_c0 | 30.594743     | 27.7693044    | 28.625186     | 13.0161727     | 16.5737081     | 17.4711961     | 1.975E-35 | -1.908205 | down      | unnamed protein product [Coffea canephora]                                                                                                            |
| c45772.graph_c0 | 11.7065894    | 10.960068     | 11.5922908    | 6.02684118     | 7.1911968      | 8.29799068     | 3.015E-10 | -1.692982 | down      | PREDICTED: diphthamide biosynthesis protein 3-like [Sesamum indicum]                                                                                  |
| c45779.graph_c0 | 119.360801    | 115.23231     | 119.872952    | 25.1568349     | 26.2441797     | 32.0404162     | 8.956E-91 | -3.106786 | down      | hypothetical protein MIMGU_mgv1a025324mg, partial [Erythranthe guttata]                                                                               |
| c45783.graph_c0 | 9.67954925    | 10.0095474    | 9.73158       | 2.23549951     | 2.91475774     | 2.27329603     | 2.074E-48 | -3.007308 | down      | PREDICTED: uncharacterized protein LOC105166430 [Sesamum indicum]                                                                                     |
| c45785.graph_c0 | 0.30562976    | 0.24474864    | 0.47129561    | 19.062023      | 22.1029267     | 19.5417922     | 2.407E-68 | 4.867501  | up        | hypothetical protein EUTSA_v10017458mg [Eutrema salsugineum]                                                                                          |
| c45789.graph_c0 | 0.04423468    | 0             | 0             | 1.01879691     | 1.77003853     | 0.90651936     | 2.097E-06 | 5.381877  | up        | --                                                                                                                                                    |
| c45791.graph_c0 | 169.044855    | 171.633505    | 169.544844    | 1178.49199     | 882.843715     | 715.49988      | 0.0003214 | 1.434435  | up        | PREDICTED: telomere repeat-binding protein 3-like [Sesamum indicum]                                                                                   |
| c45791.graph_c2 | 31.9947119    | 34.0797465    | 30.2208936    | 27.0193142     | 25.7546462     | 23.7614179     | 6.237E-16 | -1.346329 | down      | PREDICTED: uncharacterized protein LOC105178732 [Sesamum indicum]                                                                                     |
| c45793.graph_c0 | 23.6009353    | 21.3390718    | 23.6816938    | 18.5446307     | 23.6022309     | 23.2234902     | 1.085E-13 | -1.09224  | down      | PREDICTED: probable inactive receptor kinase At2g26730 [Sesamum indicum]                                                                              |
| c45800.graph_c0 | 332.182346    | 330.019441    | 328.140203    | 121.447703     | 113.585584     | 99.6645938     | 3.008E-59 | -2.580039 | down      | PREDICTED: uncharacterized protein LOC105158790 isoform X1 [Sesamum indicum]                                                                          |
| c45801.graph_c0 | 60.3363111    | 58.3350719    | 63.5450575    | 27.8651558     | 28.7731451     | 25.887639      | 1.048E-50 | -2.160679 | down      | PREDICTED: protein CPR-5 [Sesamum indicum]                                                                                                            |
| c45803.graph_c0 | 0.03215615    | 0             | 0             | 1.51084141     | 2.5734386      | 2.60959652     | 3.998E-14 | 6.6961    | up        | unnamed protein product [Vitis vinifera]                                                                                                              |
| c45804.graph_c1 | 0.61422249    | 0.65582671    | 0.47358013    | 3.81013625     | 3.67670016     | 2.51750222     | 0.001682  | 1.509443  | up        | hyponeucal protein CICLE_v10021/zomg [Citrus clementina]                                                                                              |
| c45804.graph_c2 | 38.3731817    | 40.2275865    | 35.2861276    | 18.1037983     | 18.6546913     | 19.4636284     | 1.296E-46 | -2.035632 | down      | PREDICTED: putative SWI/SNF-related matrix-associated actin-dependent regulator of chromatin subfamily A member 3-like 2 isoform X2 [Sesamum indicum] |
| c45806.graph_c0 | 0.59181134    | 0.52658129    | 0.63375084    | 8.87489206     | 8.69592939     | 9.8912457      | 5.86E-18  | 2.950981  | up        | unnamed protein product [Coffea canephora]                                                                                                            |
| c45809.graph_c0 | 0.19366876    | 0.12924179    | 0             | 2.43841064     | 2.45719062     | 4.02185164     | 9.671E-08 | 3.78325   | up        | PREDICTED: uncharacterized protein LOC105176285 [Sesamum indicum]                                                                                     |
| c45813.graph_c1 | 5.60474374    | 6.2478965     | 4.71970055    | 4.43978939     | 2.56926826     | 3.11515033     | 2.891E-14 | -1.716708 | down      | hypothetical protein MIMGU_mgv1a004624mg [Erythranthe guttata]                                                                                        |
| c45817.graph_c0 | 2.58666228    | 2.58925243    | 2.86862599    | 11.7517907     | 11.9654463     | 12.6351462     | 4.134E-06 | 1.156638  | up        | PREDICTED: LOW QUALITY PROTEIN: actin-related protein 2 [Tarenaya hassleriana]                                                                        |
| c45818.graph_c0 | 105.119902    | 102.011447    | 102.794686    | 22.8116648     | 23.4344525     | 23.3549418     | 1.498E-96 | -3.172522 | down      | PREDICTED: uncharacterized protein LOC101291143 [Fragaria vesca subsp. vesca]                                                                         |
| c45819.graph_c1 | 20.2784516    | 20.6903733    | 17.5958481    | 18.2012707     | 18.9638538     | 16.5695319     | 1.284E-09 | -1.139795 | down      | -                                                                                                                                                     |

| #ID             | 0 h-1<br>FPKM | 0 h-2<br>FPKM | 0 h-3<br>FPKM | 48 h-1<br>FPKM | 48 h-2<br>FPKM | 48 h-3<br>FPKM | FDR       | log2FC    | regulated | nr_annotation                                                                          |
|-----------------|---------------|---------------|---------------|----------------|----------------|----------------|-----------|-----------|-----------|----------------------------------------------------------------------------------------|
| c45819.graph_c2 | 1.674902      | 1.67657916    | 1.78682786    | 18.3416651     | 16.1614659     | 14.7141782     | 3.138E-21 | 2.244936  | up        | PREDICTED: uncharacterized protein LOC105166519 [Sesamum indicum]                      |
| c45820.graph_c2 | 44.53843      | 46.8490689    | 50.6713957    | 22.3103843     | 21.3743937     | 20.3695148     | 7.913E-45 | -2.166546 | down      | PREDICTED: uncharacterized protein LOC105161926 [Sesamum indicum]                      |
| c45822.graph_c0 | 40.7677868    | 36.5746038    | 39.4935479    | 19.8982486     | 18.049563      | 17.8528865     | 9.323E-42 | -2.081594 | down      | hypoteucal protein ΕΥΟΚΣΟΥΖ_ΚΟΥΒΩΣ [Eucalyptus                                         |
| c45823.graph_c0 | 4.58625593    | 5.09395504    | 5.00545572    | 21.0389722     | 21.1232425     | 21.4498656     | 2.467E-09 | 1.096748  | up        | PREDICTED: cysteine--UKINA ligase-like [Sesamum indicum]                               |
| c45829.graph_c0 | 48.0823459    | 50.3227045    | 47.5484003    | 29.4206469     | 37.292665      | 39.7095827     | 3.649E-25 | -1.477657 | down      | PREDICTED: nucleobase-ascorbate transporter 3 [Sesamum indicum]                        |
| c45829.graph_c3 | 0.39198713    | 0.50448811    | 0.21587956    | 3.04376034     | 4.09893433     | 4.49856484     | 9.707E-06 | 2.370441  | up        | PREDICTED: uncharacterized protein LOC105167094 [Sesamum indicum]                      |
| c45831.graph_c0 | 128.125325    | 127.479651    | 134.797021    | 55.560982      | 36.0958449     | 29.446142      | 2.247E-75 | -2.696124 | down      | PREDICTED: uncharacterized protein LOC105166052 [Sesamum indicum]                      |
| c45832.graph_c1 | 52.6036305    | 56.1343713    | 57.7678654    | 31.1912968     | 25.5251697     | 23.0729917     | 7.172E-48 | -2.074646 | down      | PREDICTED: probable mitochondrial chaperone BCS1-B [Sesamum indicum]                   |
| c45833.graph_c0 | 0             | 0             | 0             | 25.3918345     | 42.7727393     | 14.0446091     | 6.046E-09 | Inf       | up        | ous ribosomal protein L52a-4 [Auzenocniorena protobocidae]                             |
| c45835.graph_c1 | 21.184085     | 19.9350968    | 19.7939826    | 88.3098159     | 94.2243615     | 90.3952358     | 2.773E-16 | 1.145863  | up        | PREDICTED: putative aconitate hydratase, cytoplasmic [Sesamum indicum]                 |
| c45837.graph_c0 | 1.50607729    | 0.89512883    | 1.02816475    | 0              | 0              | 0              | 3.592E-19 | -Inf      | down      | hypothetical protein EMIHUDRAFT_61288, partial [Emiliania huxleyi CCMP1516]            |
| c45838.graph_c0 | 33.8427139    | 36.1916321    | 35.2916565    | 19.1045856     | 18.7530436     | 17.0623392     | 6.756E-43 | -1.955975 | down      | PREDICTED: uncharacterized protein LOC105173340 isoform X4 [Sesamum indicum]           |
| c45839.graph_c0 | 2.71880769    | 2.93212476    | 2.16281342    | 1.4312817      | 2.06907597     | 2.33483406     | 3.037E-08 | -1.443436 | down      | -                                                                                      |
| c45840.graph_c0 | 1.72307764    | 1.14986869    | 1.19937078    | 8.56540792     | 8.33828046     | 8.03341865     | 8.37E-07  | 1.600354  | up        | PREDICTED: uncharacterized protein LOC101257656 isoform X1 [Solanum lycopersicum]      |
| c45844.graph_c0 | 113.01763     | 106.896536    | 109.187362    | 32.0101329     | 30.2775485     | 26.3136138     | 1.22E-84  | -2.908203 | down      | PREDICTED: LOW QUALITY PROTEIN: uncharacterized protein LOC105169583 [Sesamum indicum] |
| c45845.graph_c0 | 60.6352427    | 58.4281516    | 57.5669965    | 23.2344539     | 22.4238501     | 22.4784616     | 3.841E-62 | -2.390544 | down      | hypothetical protein MIMGU_mgv1a000962mg [Erythranthe guttata]                         |
| c45846.graph_c0 | 0             | 0             | 0             | 6.18919501     | 7.3280783      | 3.56342315     | 3.493E-09 | Inf       | up        | --                                                                                     |
| c45850.graph_c0 | 126.036413    | 122.193321    | 116.101354    | 18.0969867     | 21.3149676     | 22.5036195     | 8.18E-125 | -3.576995 | down      | PREDICTED: uncharacterized protein LOC105163078 [Sesamum indicum]                      |
| c45850.graph_c1 | 2.63649726    | 2.32601932    | 2.87118929    | 2.09956907     | 2.74758916     | 2.71069826     | 0.0077932 | -1.075461 | down      | hypothetical protein MIMGU_mgv1a017816mg, partial [Erythranthe guttata]                |
| c45851.graph_c0 | 2.19023645    | 2.01602725    | 2.26457286    | 0.27831568     | 0.61425357     | 0.5159242      | 2.182E-15 | -3.230214 | down      | -                                                                                      |
| c45857.graph_c0 | 0.51056181    | 0.70763963    | 0.45421764    | 2.2794507      | 2.75977328     | 3.28381961     | 0.0076216 | 1.295407  | up        | PREDICTED: prolyl 3-hydroxylase 1 isoform X1 [Sesamum indicum]                         |



| #ID             | 0 h-1<br>FPKM | 0 h-2<br>FPKM | 0 h-3<br>FPKM | 48 h-1<br>FPKM | 48 h-2<br>FPKM | 48 h-3<br>FPKM | FDR       | log2FC    | regulated | nr_annotation                                                                                     |
|-----------------|---------------|---------------|---------------|----------------|----------------|----------------|-----------|-----------|-----------|---------------------------------------------------------------------------------------------------|
| c45860.graph_c0 | 12.606571     | 12.7884175    | 11.7930619    | 12.8376923     | 12.2564797     | 11.3041191     | 5.908E-11 | -1.04607  | down      | PREDICTED: serine/threonine-protein kinase svkA-like isoform X2 [Sesamum indicum]                 |
| c45862.graph_c0 | 10.0745487    | 9.97885396    | 9.59647946    | 9.2651053      | 10.3481329     | 8.09965609     | 1.453E-12 | -1.114777 | down      | PREDICTED: uncharacterized protein LOC105160721 [Sesamum indicum]                                 |
| c45863.graph_c0 | 39.592594     | 38.1032184    | 37.1378365    | 29.3828644     | 33.930257      | 32.2551423     | 2.03E-19  | -1.284169 | down      | hypothetical protein MIMGU_mgv1a004300mg [Erythranthe guttata]                                    |
| c45865.graph_c0 | 0.05673674    | 0.02839677    | 0             | 2.35213118     | 2.82403748     | 3.67422361     | 3.003E-16 | 5.6952    | up        | PREDICTED: type I inositol 1,4,5-trisphosphate 5-phosphatase CVP2-like [Sesamum indicum]          |
| c45867.graph_c0 | 50.7797155    | 52.3265368    | 48.8047738    | 29.0626488     | 31.8347124     | 28.7094049     | 5.948E-36 | -1.779405 | down      | PREDICTED: uncharacterized protein LOC105177822 isoform X2 [Sesamum indicum]                      |
| c45870.graph_c0 | 0.07286516    | 0.40115969    | 0.09363462    | 2.34948487     | 4.01794799     | 5.19652866     | 3.769E-06 | 3.325787  | up        | PREDICTED: kinesin-4-like isoform X2 [Sesamum indicum]                                            |
| c45871.graph_c1 | 1.94439037    | 1.9014219     | 1.94123445    | 20.3656943     | 16.8892125     | 14.9702798     | 5.578E-13 | 2.161087  | up        | PREDICTED: pentatricopeptide repeat-containing protein At2g03880, mitochondrial [Sesamum indicum] |
| c45873.graph_c0 | 18.2166288    | 20.3047742    | 18.0692862    | 4.60834167     | 6.95778139     | 6.53815849     | 5.392E-66 | -2.668164 | down      | hypothetical protein MIMGU_mgv1a004300mg [Erythranthe guttata]                                    |
| c45879.graph_c0 | 26.6741422    | 25.1693099    | 26.1531567    | 16.1166878     | 20.9617414     | 18.6947528     | 6.461E-24 | -1.505376 | down      | PREDICTED: oral cancer-overexpressed protein 1 homolog [Sesamum indicum]                          |
| c45882.graph_c0 | 7.03864343    | 6.50716737    | 5.87632751    | 5.08018002     | 6.7382321      | 6.90909726     | 5.095E-05 | -1.073688 | down      | PREDICTED: auxin-binding protein 192-like [Sesamum indicum]                                       |
| c45884.graph_c1 | 0.28737606    | 0.14383191    | 0.46161201    | 7.08205095     | 5.81975384     | 7.83278807     | 6.675E-11 | 3.513146  | up        | hypothetical protein MIMGU_mgv1a007716mg [Erythranthe guttata]                                    |
| c45885.graph_c0 | 2.70944439    | 2.32967374    | 2.36579995    | 1.31206145     | 2.84774343     | 2.64815092     | 0.0019624 | -1.150253 | down      | PREDICTED: ADP,ATP carrier protein ER-ANT1 [Sesamum indicum]                                      |
| c45895.graph_c1 | 17.2213579    | 15.8637446    | 15.8848149    | 7.10538029     | 12.476739      | 13.0776852     | 4.508E-09 | -1.611258 | down      | hypothetical protein MIMGU_mgv1a014929mg [Erythranthe guttata]                                    |
| c45898.graph_c0 | 0.90639556    | 1.20973757    | 1.39770502    | 6.17922725     | 10.8512624     | 10.1544058     | 1.434E-06 | 1.921258  | up        | PREDICTED: uncharacterized protein LOC105158788 [Sesamum indicum]                                 |
| c45900.graph_c0 | 2.3085226     | 2.05407488    | 1.75795137    | 20.2436196     | 21.3622142     | 19.4144137     | 2.963E-11 | 2.302286  | up        | -                                                                                                 |
| c45902.graph_c1 | 1.16714335    | 0.89870159    | 1.09602627    | 0              | 0              | 0              | 1.861E-19 | -Inf      | down      | --                                                                                                |
| c45904.graph_c0 | 16.3871601    | 15.1170149    | 19.4065299    | 3.25619858     | 5.01752373     | 4.87280904     | 9.908E-16 | -2.980497 | down      | -                                                                                                 |
| c45905.graph_c0 | 0.79129968    | 0.77277273    | 1.24006271    | 4.96073487     | 5.08577137     | 3.60716598     | 3.293E-05 | 1.262918  | up        | PREDICTED: uncharacterized protein LOC105156411 [Sesamum indicum]                                 |
| c45908.graph_c0 | 0             | 0             | 0.08585955    | 5.84763662     | 9.32489745     | 11.5017926     | 4.554E-15 | 7.219894  | up        | PREDICTED: chlorophyll a-b binding protein CP24 10A, chloroplastic [Cucumis melo]                 |
| c45909.graph_c0 | 2.62817017    | 3.34266593    | 2.86077407    | 11.1946826     | 11.6481725     | 14.3965038     | 4.722E-06 | 1.056315  | up        | hypothetical protein MIMGU_mgv1a014735mg [Erythranthe guttata]                                    |
| c45916.graph_c0 | 749.525642    | 742.087625    | 782.110347    | 52.3614647     | 59.2546007     | 61.224795      | 1.49E-153 | -4.738052 | down      | PREDICTED: translocator protein nomolog [Sesamum indicum]                                         |
| c45917.graph_c1 | 104.635673    | 113.471287    | 106.383371    | 98.3583818     | 91.5310238     | 88.2215608     | 7.509E-18 | -1.238083 | down      | PREDICTED: signal recognition particle receptor subunit alpha homolog [Sesamum indicum]           |

| #ID             | 0 h-1<br>FPKM | 0 h-2<br>FPKM | 0 h-3<br>FPKM | 48 h-1<br>FPKM | 48 h-2<br>FPKM | 48 h-3<br>FPKM | FDR       | log2FC    | regulated | nr_annotation                                                                                      |
|-----------------|---------------|---------------|---------------|----------------|----------------|----------------|-----------|-----------|-----------|----------------------------------------------------------------------------------------------------|
| c45918.graph_c0 | 40.7104172    | 37.6025027    | 37.5451745    | 31.9322697     | 34.3597034     | 35.5536169     | 9.701E-15 | -1.204467 | down      | PREDICTED: E3 ubiquitin-protein ligase At3g02290-like [Sesamum indicum]                            |
| c45918.graph_c1 | 15.5233174    | 16.0421446    | 17.4444726    | 9.26386559     | 9.62993088     | 8.44900519     | 1.946E-17 | -1.860263 | down      | -                                                                                                  |
| c45918.graph_c4 | 33.7718362    | 36.3636482    | 33.8041943    | 23.2192101     | 21.7615949     | 18.6887528     | 3.133E-28 | -1.72175  | down      | PREDICTED: orancnpoin-binding protein [Sesamum indicum]                                            |
| c45921.graph_c0 | 1.02637137    | 0.68493275    | 1.09910654    | 0.55157682     | 0.22260143     | 0.32719316     | 2.218E-06 | -2.356059 | down      | PREDICTED: serine/threonine-protein kinase CTR1-like [Sesamum indicum]                             |
| c45923.graph_c0 | 4.52820123    | 2.98442488    | 3.6008155     | 20.8377198     | 22.5782345     | 22.8228612     | 9.664E-20 | 1.55746   | up        | PREDICTED: alpha-glucosidase 2 [Sesamum indicum]                                                   |
| c45925.graph_c2 | 0.91159577    | 1.3687629     | 1.03627089    | 7.97830412     | 7.04907464     | 8.90973514     | 3.595E-08 | 1.834868  | up        | PREDICTED: protein LATERAL ROOT PRIMORDIUM 1-like [Sesamum indicum]                                |
| c45928.graph_c0 | 0.56570624    | 0.52432659    | 0.64618215    | 3.26210992     | 5.11214484     | 5.34148166     | 1.902E-08 | 1.954339  | up        | hypothetical protein MIMGU_mgv1a002000mg [Erythranthe guttata]                                     |
| c45931.graph_c1 | 18.3572667    | 18.1581854    | 20.3328382    | 10.2739028     | 13.2515677     | 10.8037764     | 4.094E-25 | -1.749666 | down      | PREDICTED: uncharacterized protein LOC105168924 isoform X1 [Sesamum indicum]                       |
| c45932.graph_c0 | 23.3356479    | 22.4040867    | 24.0935145    | 13.7913757     | 12.5691467     | 12.7527178     | 2.426E-30 | -1.852473 | down      | PREDICTED: uncharacterized protein LOC105174716 [Sesamum indicum]                                  |
| c45933.graph_c0 | 26.5326757    | 25.6508661    | 27.2097947    | 20.1839106     | 17.2071432     | 14.0275559     | 1.305E-24 | -1.639748 | down      | PREDICTED: N-acylphosphatidylethanolamine synthase isoform X3 [Sesamum indicum]                    |
| c45935.graph_c0 | 7.12576487    | 6.12941238    | 6.16262177    | 48.4990485     | 52.9654445     | 56.5024124     | 9.3E-40   | 2.005618  | up        | PREDICTED: 4-hydroxy-tetrahydrodipicolinate reductase 2, chloroplastic-like [Sesamum indicum]      |
| c45939.graph_c0 | 66.0537789    | 60.5230487    | 66.2147865    | 26.0329851     | 21.7206385     | 22.242826      | 4.913E-66 | -2.476055 | down      | PREDICTED: pentatricopeptide repeat-containing protein At5g65560-like isoform X1 [Sesamum indicum] |
| c45940.graph_c0 | 51.6757703    | 50.202837     | 47.9302893    | 59.2093932     | 44.6327673     | 46.8371336     | 7.748E-13 | -1.003069 | down      | hypothetical protein MIMGU_mgv1a013847mg [Erythranthe guttata]                                     |
| c45941.graph_c0 | 6.12962639    | 4.95454763    | 5.77071296    | 4.80146978     | 5.05458399     | 3.68118047     | 1.336E-07 | -1.332488 | down      | PREDICTED: exonuclease V, chloroplastic-like [Sesamum indicum]                                     |
| c45944.graph_c0 | 33.8870908    | 35.6901473    | 32.6350039    | 15.9280604     | 14.1365354     | 14.7081052     | 6.996E-47 | -2.205653 | down      | PREDICTED: probable E3 ubiquitin-protein ligase LUL4 isoform X2 [Sesamum indicum]                  |
| c45947.graph_c0 | 28.3022102    | 36.5447339    | 26.6852847    | 195.507531     | 229.737203     | 200.621233     | 6.102E-35 | 1.755615  | up        | hypothetical protein JCGZ_17777 [Jatropha curcas]                                                  |
| c45950.graph_c0 | 2.59269447    | 3.89293599    | 2.57450708    | 1.737134       | 1.55273864     | 1.88381138     | 1.842E-05 | -1.823432 | down      | Gag-pol polyprotein, putative [Solanum demissum]                                                   |
| c45951.graph_c0 | 0.80840209    | 0.35964959    | 0.46170164    | 15.515682      | 15.0343611     | 19.4016955     | 9.176E-32 | 3.922695  | up        | PREDICTED: probable ribose-5-phosphate isomerase 4, chloroplastic [Sesamum indicum]                |
| c45956.graph_c0 | 1.51541035    | 1.3555525     | 1.61589637    | 7.69337378     | 7.77258136     | 6.63407316     | 3.416E-05 | 1.282698  | up        | PREDICTED: rop guanine nucleotide exchange factor 12-like [Sesamum indicum]                        |
| c45957.graph_c1 | 53.6807718    | 50.5769009    | 52.5207238    | 14.8842823     | 20.5868641     | 25.5210144     | 1.323E-60 | -2.386777 | down      | hypothetical protein MIMGU_mgv1a008606mg [Erythranthe guttata]                                     |
| c45958.graph_c0 | 2.32126634    | 1.93632561    | 1.41497447    | 8.22500751     | 9.29429134     | 12.0024421     | 1.104E-06 | 1.362497  | up        | unnamed protein product [Vitis vinifera]                                                           |

| #ID             | 0 h-1<br>FPKM | 0 h-2<br>FPKM | 0 h-3<br>FPKM | 48 h-1<br>FPKM | 48 h-2<br>FPKM | 48 h-3<br>FPKM | FDR       | log2FC    | regulated | nr_annotation                                                                     |
|-----------------|---------------|---------------|---------------|----------------|----------------|----------------|-----------|-----------|-----------|-----------------------------------------------------------------------------------|
| c45960.graph_c0 | 24.532705     | 23.6030113    | 24.6538193    | 5.76349348     | 5.72774919     | 4.48117647     | 9.53E-102 | -3.203819 | down      | PREDICTED: F-box/LRR-repeat protein 3 isoform X1 [Sesamum indicum]                |
| c45961.graph_c1 | 28.8907065    | 29.7745868    | 28.4169092    | 13.9922176     | 16.2183824     | 13.6982543     | 1.293E-44 | -2.006599 | down      | PREDICTED: digalactosyldiacylglycerol synthase 1, chloroplastic [Sesamum indicum] |
| c45963.graph_c0 | 65.9154636    | 64.7431545    | 62.5543002    | 26.8013312     | 27.3665163     | 23.7800584     | 5.863E-59 | -2.325874 | down      | PREDICTED: protein MEI2-like 2 [Sesamum indicum]                                  |
| c45964.graph_c0 | 5.35484837    | 5.60760477    | 4.97563126    | 27.8791058     | 33.0722437     | 34.9364223     | 1.328E-21 | 1.56881   | up        | PREDICTED: probable inactive receptor kinase At4g23740 [Sesamum indicum]          |
| c45964.graph_c5 | 179.862678    | 185.174559    | 169.028982    | 123.326369     | 83.2390912     | 70.8840304     | 9.48E-41  | -1.952009 | down      | PREDICTED: uncharacterized protein LOC105172390 isoform X1 [Sesamum indicum]      |
| c45964.graph_c6 | 32.6480749    | 30.9616051    | 31.9690862    | 8.92494815     | 6.41175687     | 5.72707748     | 2.48E-103 | -3.19163  | down      | hypothetical protein MIMGU_mgv1a000896mg [Erythranthe guttata]                    |
| c45965.graph_c0 | 1.27235411    | 1.62741379    | 1.36252117    | 7.27725683     | 6.82977851     | 7.17058923     | 5.415E-08 | 1.30335   | up        | PREDICTED: LOW QUALITY PROTEIN: WD repeat-containing protein 76 [Sesamum indicum] |
| c45969.graph_c0 | 14.497262     | 7.60140798    | 9.31477785    | 0              | 0              | 0              | 1.376E-21 | -Inf      | down      | --                                                                                |
| c45970.graph_c0 | 5.58367768    | 3.9088351     | 5.01798311    | 20.7106772     | 20.3020409     | 20.283026      | 7.388E-08 | 1.061606  | up        | PREDICTED: magnesium/proton exchanger-like isoform X3 [Sesamum indicum]           |
| c45973.graph_c0 | 9.00342193    | 10.1389922    | 9.50711314    | 4.89513809     | 6.51826908     | 6.45787747     | 4.761E-24 | -1.703614 | down      | PREDICTED: F-box/kelch-repeat protein At1g55270-like [Sesamum indicum]            |
| c45974.graph_c1 | 5.67069907    | 2.73307061    | 4.04837379    | 3.4828119      | 3.89459562     | 2.41032174     | 0.0058107 | -1.362154 | down      | hypothetical protein POPTR_0012s15190g, partial [Populus trichocarpa]             |
| c45974.graph_c3 | 3.96752017    | 2.69761791    | 3.55927469    | 2.5861828      | 2.55709728     | 2.57731029     | 3.659E-05 | -1.422627 | down      | hypothetical protein MIMGU_mgv1a004105mg [Erythranthe guttata]                    |
| c45979.graph_c0 | 1.15627696    | 1.3268155     | 0.83353216    | 4.7805792      | 5.2295889      | 5.45587188     | 0.0006337 | 1.205666  | up        | PREDICTED: uncharacterized protein LOC105161942 [Sesamum indicum]                 |
| c45981.graph_c1 | 44.5813044    | 46.6543979    | 41.9212747    | 33.0252458     | 32.4235568     | 31.3743447     | 1.001E-25 | -1.475667 | down      | PREDICTED: DEAD-box ATP-dependent RNA helicase 51-like [Sesamum indicum]          |
| c45983.graph_c1 | 4.4683854     | 4.10152806    | 4.07360681    | 17.1963806     | 19.2542473     | 19.2958677     | 3.502E-12 | 1.121588  | up        | PREDICTED: epidermal growth factor receptor substrate 15-like [Sesamum indicum]   |
| c45984.graph_c0 | 2.60928811    | 2.68724421    | 3.09511249    | 1.66420135     | 2.44863825     | 2.59139362     | 2.17E-05  | -1.35041  | down      | PREDICTED: uncharacterized protein LOC105157708 [Sesamum indicum]                 |
| c45985.graph_c0 | 12.0303205    | 11.738667     | 10.8826308    | 4.27769386     | 5.1625309      | 4.98491123     | 1.538E-49 | -2.284051 | down      | PREDICTED: uncharacterized protein LOC105175876 isoform X1 [Sesamum indicum]      |
| c45987.graph_c0 | 2.70987778    | 2.53997187    | 2.05772287    | 40.2619971     | 48.2788215     | 53.6161579     | 1.022E-53 | 3.263031  | up        | hypothetical protein MIMGU_mgv1a004935mg [Erythranthe guttata]                    |
| c45991.graph_c0 | 0.54265933    | 0.50698921    | 0.46489248    | 6.13251355     | 5.36680154     | 5.9015112      | 1.522E-09 | 2.508045  | up        | PREDICTED: uncharacterized protein LOC105179859 isoform X3 [Sesamum indicum]      |

| #ID             | 0 h-1<br>FPKM | 0 h-2<br>FPKM | 0 h-3<br>FPKM | 48 h-1<br>FPKM | 48 h-2<br>FPKM | 48 h-3<br>FPKM | FDR       | log2FC    | regulated | nr_annotation                                                                                                |
|-----------------|---------------|---------------|---------------|----------------|----------------|----------------|-----------|-----------|-----------|--------------------------------------------------------------------------------------------------------------|
| c45995.graph_c0 | 0             | 0             | 0             | 2.52062402     | 4.41179257     | 2.73040916     | 3.075E-09 | Inf       | up        | PREDICTED: auxin-repressed 12.5 kDa protein-like [Nicotiana tomentosiformis]                                 |
| c45999.graph_c0 | 0.12562038    | 0.25149235    | 0             | 5.17890364     | 9.01121567     | 8.00635153     | 1.345E-17 | 4.867642  | up        | PREDICTED: heparanase-like protein 1 isoform X1 [Sesamum indicum]                                            |
| c46005.graph_c0 | 0.31399005    | 0.12572179    | 0.48418758    | 2.11165726     | 2.26768927     | 1.90467884     | 0.0003061 | 1.739976  | up        | MYB-related transcription factor [Salvia miltiorrhiza]                                                       |
| c46005.graph_c1 | 28.772816     | 26.4903859    | 28.928894     | 27.4891502     | 25.9579336     | 24.5324772     | 5.015E-13 | -1.126811 | down      | PREDICTED: CD2 antigen cytoplasmic tail-binding protein 2 [Sesamum indicum]                                  |
| c46007.graph_c1 | 39.7646948    | 34.6807407    | 37.4546317    | 475.401896     | 551.398887     | 572.451114     | 1.566E-70 | 2.816773  | up        | PREDICTED: glyoxysomal fatty acid beta-oxidation multifunctional protein MFP-a [Sesamum indicum]             |
| c46010.graph_c0 | 59.179845     | 60.9146952    | 53.910594     | 43.3720978     | 45.4709861     | 41.6510235     | 1.373E-24 | -1.431704 | down      | PREDICTED: phosphoinositide phosphatase SAC1 isoform X4 [Sesamum indicum]                                    |
| c46014.graph_c0 | 29.2703722    | 31.4810163    | 31.9457863    | 24.8136533     | 32.7354676     | 33.5830051     | 2.064E-13 | -1.047934 | down      | PREDICTED: RNA polymerase I termination factor [Sesamum indicum]                                             |
| c46015.graph_c0 | 0.08872793    | 0             | 0             | 1.92093607     | 3.07414719     | 3.09117396     | 3.794E-12 | 5.505458  | up        | PREDICTED: cytochrome P450 724B1 isoform X1 [Vitis vinifera]                                                 |
| c46016.graph_c0 | 6.24084055    | 5.66746292    | 6.8622408     | 29.3104392     | 26.3100279     | 30.3522454     | 2.368E-12 | 1.17749   | up        | PREDICTED: uncharacterized protein LOC105163003 isoform X1 [Sesamum indicum]                                 |
| c46019.graph_c0 | 0.06797729    | 0.34022679    | 0.08735351    | 1.31512735     | 2.18934252     | 2.45183172     | 3.219E-05 | 2.565402  | up        | Malate dehydrogenase [Morus notabilis]                                                                       |
| c46020.graph_c0 | 99.4260407    | 99.697493     | 90.9464743    | 53.7427729     | 48.6979213     | 43.054084      | 3.423E-44 | -2.008959 | down      | PREDICTED: flowering time control protein FCA isoform X4 [Sesamum indicum]                                   |
| c46021.graph_c1 | 1.42281992    | 1.24621407    | 0.45709498    | 7.0455205      | 10.4147088     | 8.89332019     | 1.959E-05 | 2.061529  | up        | PREDICTED: probable cyclic nucleotide-gated ion channel 5 [Sesamum indicum]                                  |
| c46028.graph_c0 | 126.903244    | 126.947635    | 116.654494    | 548.233727     | 590.756714     | 604.594567     | 7.222E-15 | 1.21638   | up        | PREDICTED: mannose-6-phosphate isomerase 2-like [Sesamum indicum]                                            |
| c46030.graph_c0 | 0.67837597    | 1.01858288    | 0.87173997    | 5.11875429     | 6.13206424     | 6.60687138     | 1.416E-11 | 1.775169  | up        | PREDICTED: uncharacterized protein LOC105166222 isoform X2 [Sesamum indicum]                                 |
| c46032.graph_c1 | 5.85874743    | 5.36901289    | 5.00147522    | 73.169796      | 60.5485765     | 61.0474858     | 1.959E-26 | 2.57275   | up        | PREDICTED: CAP-Gly domain-containing linker protein 1 [Sesamum indicum]                                      |
| c46041.graph_c1 | 19.4887847    | 20.9781032    | 18.6971283    | 15.0336851     | 18.6296147     | 17.8358435     | 9.284E-15 | -1.220564 | down      | PREDICTED: pentapeptide repeat-containing protein At2g03880, mitochondrial-like isoform X1 [Sesamum indicum] |
| c46042.graph_c0 | 3.70115574    | 3.16002925    | 3.82355682    | 22.9322138     | 22.6648628     | 20.7618838     | 1.363E-15 | 1.617262  | up        | PREDICTED: menyantholate-sensitizing dehydrogenase [acylating], mitochondrial-like [Sesamum indicum]         |
| c46051.graph_c0 | 194.468858    | 201.839392    | 190.278287    | 150.796006     | 155.86322      | 141.229037     | 1.02E-21  | -1.406136 | down      | PREDICTED: uncharacterized protein LOC105174291 isoform X1 [Sesamum indicum]                                 |
| c46053.graph_c0 | 3.00966655    | 2.68402425    | 3.51594607    | 14.8213479     | 16.5025138     | 19.064208      | 1.276E-07 | 1.42911   | up        | PREDICTED: (RS)-norcochlorine 6-O-methyltransferase-like [Cucumis melo]                                      |

| #ID             | 0 h-1<br>FPKM | 0 h-2<br>FPKM | 0 h-3<br>FPKM | 48 h-1<br>FPKM | 48 h-2<br>FPKM | 48 h-3<br>FPKM | FDR       | log2FC    | regulated | nr_annotation                                                                                                                                  |
|-----------------|---------------|---------------|---------------|----------------|----------------|----------------|-----------|-----------|-----------|------------------------------------------------------------------------------------------------------------------------------------------------|
| c46054.graph_c0 | 6.91518015    | 6.48947312    | 6.14898858    | 0.39816969     | 0.81349554     | 0.43020806     | 2.227E-51 | -4.599724 | down      | PREDICTED: exocyst complex component EXO70A1-like [Sesamum indicum]                                                                            |
| c46055.graph_c0 | 1.55264924    | 1.46169184    | 1.97146318    | 12.2095007     | 10.4810824     | 11.0457635     | 1.16E-17  | 1.740618  | up        | PREDICTED: importin-13 [Sesamum indicum]                                                                                                       |
| c46056.graph_c2 | 8.33841775    | 8.82307751    | 8.35668891    | 191.295868     | 139.916714     | 119.952144     | 2.059E-10 | 3.13448   | up        | PREDICTED: cytochrome P450 93A3-like [Sesamum indicum]                                                                                         |
| c46061.graph_c0 | 13.950679     | 13.4544018    | 11.3940987    | 11.6164797     | 14.0605472     | 13.1182709     | 8.163E-13 | -1.01865  | down      | PREDICTED: probable methyltransferase PMT18 [Sesamum indicum]                                                                                  |
| c46064.graph_c0 | 59.719391     | 52.4351838    | 58.8749237    | 9.12230056     | 8.11172721     | 9.37867309     | 1.14E-116 | -3.700705 | down      | hypothetical protein M569_12324 [Genlisea aurea]                                                                                               |
| c46067.graph_c1 | 2.32595713    | 1.57501715    | 2.32962046    | 14.4640581     | 14.8555501     | 15.9543533     | 2.193E-14 | 1.841335  | up        | PREDICTED: diacylglycerol kinase 5 [Sesamum indicum]                                                                                           |
| c46068.graph_c0 | 23.8187642    | 22.487921     | 22.8864775    | 10.8387093     | 10.425645      | 9.03775674     | 2.187E-51 | -2.206548 | down      | PREDICTED: CAUOH/FIT(+) anuporfer 18-like [Sesamum indicum]                                                                                    |
| c46070.graph_c0 | 66.8278468    | 60.9005303    | 73.2896106    | 14.6224784     | 15.5341951     | 17.8102798     | 2.18E-56  | -3.088236 | down      | PREDICTED: glucan endo-1,3-beta-glucosidase 14-like [Sesamum indicum]                                                                          |
| c46073.graph_c0 | 200.953026    | 197.225619    | 206.108563    | 75.6794746     | 70.3731448     | 54.145119      | 7.827E-62 | -2.608148 | down      | PREDICTED: RING finger and CHY zinc finger domain-containing protein 1-like isoform X1 [Sesamum indicum]                                       |
| c46074.graph_c0 | 0.26143258    | 0.57572761    | 0.47033171    | 3.9017497      | 5.46021092     | 5.1433384      | 6.275E-07 | 2.446097  | up        | PREDICTED: violaxanthin de-epoxidase, chloroplastic [Sesamum indicum]                                                                          |
| c46077.graph_c0 | 9.29998946    | 11.3156171    | 10.3024609    | 50.2247818     | 52.1898723     | 64.8000777     | 4.644E-14 | 1.41502   | up        | PREDICTED: 40S ribosomal protein S20-2-like [Sesamum indicum]                                                                                  |
| c46079.graph_c0 | 0.38714259    | 0.44715029    | 0.30614988    | 54.5965688     | 58.3034772     | 76.4092748     | 2.662E-58 | 6.357168  | up        | PREDICTED: probable beta-D-xylosidase / [Sesamum indicum]                                                                                      |
| c46082.graph_c0 | 22.2352414    | 23.1487972    | 22.31186      | 5.8331991      | 5.50367698     | 5.43364293     | 3.459E-80 | -3.029194 | down      | PREDICTED: uncharacterized protein LOC105165640 isoform X3 [Sesamum indicum]                                                                   |
| c46085.graph_c0 | 0.04991435    | 0.19985734    | 0.12828384    | 7.03560692     | 6.52779023     | 8.55157068     | 1.68E-18  | 4.849895  | up        | PREDICTED: thylakoid lumenal 29 kDa protein, chloroplastic [Sesamum indicum]                                                                   |
| c46087.graph_c1 | 1107.63223    | 1134.59727    | 1185.00262    | 58.1362544     | 49.6623638     | 42.429093      | 7.45E-138 | -5.525486 | down      | PREDICTED: SUMO-activating enzyme subunit 2 [Sesamum indicum]                                                                                  |
| c46087.graph_c2 | 102.103117    | 108.075582    | 96.7042365    | 54.5518933     | 53.305189      | 41.9917311     | 6.134E-47 | -2.04855  | down      | PREDICTED: zinc finger protein JACKDAW-like [Sesamum indicum]                                                                                  |
| c46088.graph_c0 | 0             | 0             | 0.29351285    | 3.78763216     | 2.11772786     | 4.21276539     | 2.415E-06 | 4.062309  | up        | PREDICTED: protein TIC 62, chloroplastic [Beta vulgaris subsp. vulgaris]                                                                       |
| c46089.graph_c0 | 2.08686183    | 1.88005636    | 1.60902005    | 6.98527676     | 9.53860135     | 9.4087197      | 6.905E-05 | 1.196821  | up        | PREDICTED: 1-(5-phosphoribosyl)-5-[(5-phosphoribosylamino)methylideneamino] imidazole-4-carboxamide isomerase, chloroplastic [Sesamum indicum] |
| c46091.graph_c0 | 0.55278043    | 0.59022289    | 0.49724132    | 2.58023745     | 2.64353263     | 1.8427456      | 0.0063378 | 1.093167  | up        | PREDICTED: aspartic proteinase-like protein 1 isoform X2 [Sesamum indicum]                                                                     |
| c46093.graph_c0 | 0.53558359    | 0.31427718    | 0.71197874    | 6.49946047     | 5.0649075      | 6.01026909     | 1.639E-16 | 2.472913  | up        | PREDICTED: uncharacterized protein LOC105169441 [Sesamum indicum]                                                                              |
| c46094.graph_c0 | 11.6622083    | 13.5975969    | 11.8149497    | 6.17802544     | 5.50835115     | 5.13235017     | 4.31E-49  | -2.154474 | down      | PREDICTED: probable protein phosphatase 2C 23 [Sesamum indicum]                                                                                |

| #ID             | 0 h-1<br>FPKM | 0 h-2<br>FPKM | 0 h-3<br>FPKM | 48 h-1<br>FPKM | 48 h-2<br>FPKM | 48 h-3<br>FPKM | FDR       | log2FC    | regulated | nr_annotation                                                                                                                          |
|-----------------|---------------|---------------|---------------|----------------|----------------|----------------|-----------|-----------|-----------|----------------------------------------------------------------------------------------------------------------------------------------|
| c46097.graph_c0 | 5.39513255    | 5.26881459    | 6.73004305    | 4.6551552      | 4.59766392     | 4.96192549     | 1.139E-08 | -1.311575 | down      | PREDICTED: uncharacterized protein LOC105179152 isoform X1 [Sesamum indicum]                                                           |
| c46100.graph_c0 | 1.43916961    | 1.31349801    | 1.19666407    | 0.31196633     | 0.70229232     | 0.76336086     | 9.226E-06 | -2.181078 | down      | hypothetical protein M569_02521, partial [Genlisea aurea]                                                                              |
| c46102.graph_c0 | 0             | 0             | 0             | 1.49049485     | 1.13211218     | 0.87581448     | 2.782E-10 | Inf       | up        | predicted protein [Hordeum vulgare subsp. vulgare]                                                                                     |
| c46103.graph_c1 | 11.3382725    | 11.0237995    | 10.0852249    | 7.89664055     | 7.02422403     | 6.67061703     | 9.662E-24 | -1.601165 | down      | PREDICTED: uncharacterized protein LOC105171484 [Sesamum indicum]                                                                      |
| c46111.graph_c1 | 0             | 0             | 0             | 9.35399991     | 7.62263744     | 11.5243378     | 3.984E-13 | Inf       | up        | -                                                                                                                                      |
| c46114.graph_c0 | 0             | 0             | 0             | 18.889318      | 29.485149      | 17.4769308     | 2.816E-21 | Inf       | up        | 40S ribosomal protein S17 [Auxenochlorella protothecoides]                                                                             |
| c46120.graph_c0 | 10.1528231    | 10.2850676    | 9.83405916    | 8.8759398      | 8.77810024     | 8.92246695     | 7.046E-11 | -1.20476  | down      | PREDICTED: PHD finger protein ALFIN-LIKE 3-like isoform X2 [Elaeis guineensis]                                                         |
| c46122.graph_c0 | 27.8332174    | 27.5182783    | 26.0849493    | 26.9898328     | 28.8355366     | 25.4700958     | 2.477E-12 | -1.019612 | down      | PREDICTED: dipeptidyl peptidase 9 [Sesamum indicum]                                                                                    |
| c46130.graph_c0 | 110.017843    | 121.043923    | 115.133348    | 37.2132632     | 32.873442      | 25.5746304     | 1.468E-85 | -2.868694 | down      | PREDICTED: GATA transcription factor 5-like [Sesamum indicum]                                                                          |
| c46131.graph_c0 | 59.2527075    | 60.6103451    | 54.0363113    | 46.4433622     | 48.2683882     | 44.8363924     | 5.807E-21 | -1.334017 | down      | PREDICTED: protein MODIFIER OF SNC1 1, partial [Sesamum indicum]                                                                       |
| c46142.graph_c0 | 29.4889497    | 27.600508     | 26.8262817    | 17.7527871     | 19.7152143     | 18.4290437     | 9.607E-30 | -1.604313 | down      | PREDICTED: homeobox protein LUMINIDEPENDENS [Sesamum indicum]                                                                          |
| c46143.graph_c0 | 0.32799317    | 0.2872814     | 0.52685526    | 2.30403633     | 2.92101376     | 3.26002318     | 0.0001351 | 1.864502  | up        | hypothetical protein MIMGU_mgv1a018015mg [Erythranthe guttata]                                                                         |
| c46144.graph_c1 | 0.7761794     | 1.06831536    | 0.78962516    | 50.5909966     | 56.120116      | 64.0504146     | 7.33E-115 | 4.99926   | up        | hypothetical protein MIMGU_mgv1a007954mg [Erythranthe guttata]                                                                         |
| c46144.graph_c2 | 0             | 0             | 0             | 106.85531      | 88.0189656     | 121.565565     | 4.636E-65 | Inf       | up        | major latex-like protein 1 [Plantago major]                                                                                            |
| c46146.graph_c0 | 11.1367911    | 11.2785829    | 9.72715566    | 40.2782738     | 47.3827472     | 46.2523954     | 2.627E-10 | 1.039927  | up        | PREDICTED: phosphatidylinositol 3,4,5-trisphosphate 3-phosphatase and dual-specificity protein phosphatase PTEN-like [Sesamum indicum] |
| c46147.graph_c1 | 1.81402578    | 1.78092221    | 0.76208873    | 15.8442508     | 12.4270747     | 9.92301689     | 4.039E-06 | 2.129096  | up        | PREDICTED: polyamine oxidase 1 [Sesamum indicum]                                                                                       |
| c46148.graph_c0 | 2.97624609    | 2.78492898    | 2.41115713    | 18.8953503     | 20.7750863     | 19.3587814     | 3.513E-10 | 1.835897  | up        | PREDICTED: proline synthase co-transcribed bacterial homolog protein-like [Sesamum indicum]                                            |
| c46149.graph_c1 | 2.07611406    | 0.95103746    | 2.21570423    | 0              | 0.03434275     | 0              | 7.282E-12 | -8.310345 | down      | PREDICTED: geraniol 8-hydroxylase-like [Vitis vinifera]                                                                                |
| c46151.graph_c0 | 1.46209687    | 0.75395564    | 0.91095873    | 9.79621096     | 12.5832009     | 11.9853382     | 5.242E-13 | 2.439483  | up        | PREDICTED: uncharacterized protein LOC105155656 [Sesamum indicum]                                                                      |
| c46155.graph_c0 | 41.1855307    | 44.2292818    | 39.9976894    | 38.0278231     | 37.0431816     | 35.4635219     | 9.39E-18  | -1.198153 | down      | PREDICTED: uncharacterized protein LOC105178641 [Sesamum indicum]                                                                      |
| c46157.graph_c0 | 4.12663321    | 4.38111483    | 5.30288706    | 28.1481157     | 27.256583      | 25.604121      | 7.267E-26 | 1.533424  | up        | PREDICTED: probable receptor-like protein kinase Atlg49730 isoform X1 [Sesamum indicum]                                                |
| c46164.graph_c0 | 31.6762686    | 30.7937336    | 30.6756541    | 10.3266135     | 10.6966882     | 12.523665      | 1.311E-53 | -2.492389 | down      | PREDICTED: protein brevis radix-like 1 [Sesamum indicum]                                                                               |

| #ID             | 0 h-1<br>FPKM | 0 h-2<br>FPKM | 0 h-3<br>FPKM | 48 h-1<br>FPKM | 48 h-2<br>FPKM | 48 h-3<br>FPKM | FDR       | log2FC    | regulated | nr_annotation                                                                              |
|-----------------|---------------|---------------|---------------|----------------|----------------|----------------|-----------|-----------|-----------|--------------------------------------------------------------------------------------------|
| c46166.graph_c0 | 0             | 0             | 0             | 19.9405137     | 45.9416164     | 14.3530361     | 1.672E-07 | Inf       | up        | ribosomal protein S18 [Micromonas pusilla CCMP1545]                                        |
| c46170.graph_c0 | 3.99701356    | 3.4453193     | 3.40043452    | 18.5820253     | 17.3737223     | 14.7594052     | 4.758E-10 | 1.212067  | up        | PREDICTED: E3 ubiquitin-protein ligase UPL7 [Sesamum indicum]                              |
| c46178.graph_c0 | 10317.9225    | 9801.13597    | 10053.0653    | 2624.4807      | 2587.15999     | 2099.82766     | 3.969E-25 | -3.060461 | down      | PREDICTED: vicilin-like antimicrobial peptides 2-2 [Sesamum indicum]                       |
| c46179.graph_c0 | 82.1261691    | 76.7874023    | 83.9799927    | 11.7909236     | 12.2139148     | 12.4201984     | 4.33E-134 | -3.75605  | down      | PREDICTED: peptidyl-prolyl cis-trans isomerase FKBP53 [Sesamum indicum]                    |
| c46180.graph_c1 | 4.35480189    | 3.86135696    | 3.93799126    | 0.07429495     | 0.10494199     | 0.15425014     | 2.517E-95 | -6.213255 | down      | PREDICTED: replication protein A 70 kDa DNA-binding subunit A isoform X1 [Sesamum indicum] |
| c46182.graph_c0 | 25.0297438    | 22.9480968    | 19.0280772    | 12.672081      | 12.4708778     | 14.8492103     | 2.281E-18 | -1.760499 | down      | PREDICTED: uncharacterized protein LOC105163032 [Sesamum indicum]                          |
| c46183.graph_c0 | 0             | 0.02042156    | 0             | 2.2741774      | 3.78306519     | 4.96689393     | 1.397E-13 | 8.060132  | up        | PREDICTED: uncharacterized protein LOC105179348 isoform X2 [Sesamum indicum]               |
| c46184.graph_c0 | 3.41155127    | 3.45765452    | 4.05518007    | 21.6470237     | 20.9346562     | 19.820706      | 9.263E-12 | 1.495833  | up        | PREDICTED: DNA repair protein KAD30 [Sesamum indicum]                                      |
| c46185.graph_c0 | 0             | 0             | 0             | 1.85317845     | 1.4724134      | 1.29560125     | 1.128E-10 | Inf       | up        | --                                                                                         |
| c46186.graph_c0 | 0             | 0             | 0             | 6.97249021     | 5.35085613     | 4.83625123     | 1.467E-18 | Inf       | up        | ATP synthase F0 subunit 9 (mitochondrion) [Hildenbrandia rubra]                            |
| c46190.graph_c1 | 38.0099736    | 40.559052     | 37.6405934    | 17.2761244     | 16.4359354     | 15.7608849     | 7.77E-56  | -2.247766 | down      | PREDICTED: protein ASPARTIC PROTEASE IN GUARD CELL 1-like [Sesamum indicum]                |
| c46190.graph_c3 | 1.82599866    | 1.82782712    | 4.35774963    | 42.8968411     | 43.1527075     | 48.9679633     | 2.431E-23 | 3.046065  | up        | -                                                                                          |
| c46199.graph_c0 | 1.2621641     | 1.34117738    | 1.47221414    | 7.03039449     | 10.0252237     | 10.4737573     | 2.842E-11 | 1.730298  | up        | PREDICTED: IAA-amino acid hydrolase ILR1-like 3 [Sesamum indicum]                          |
| c46204.graph_c0 | 6.73143247    | 5.54908363    | 5.99291939    | 53.6241702     | 69.9047032     | 72.3831668     | 3.43E-31  | 2.400403  | up        | PREDICTED: probable cinnamyl alcohol dehydrogenase 6 [Sesamum indicum]                     |
| c46206.graph_c0 | 3.60387609    | 3.48948299    | 4.32815277    | 1.56697522     | 2.67904257     | 2.76096066     | 4.248E-13 | -1.73404  | down      | hypothetical protein MIMGU_mgv1a005772mg [Erythranthe guttata]                             |
| c46208.graph_c0 | 17.8031739    | 17.5971895    | 17.8496991    | 1.87960045     | 2.15486976     | 2.29103723     | 4.68E-107 | -4.094055 | down      | PREDICTED: uncharacterized protein LOC105158293 isoform X2 [Sesamum indicum]               |
| c46211.graph_c0 | 128.458572    | 128.041881    | 123.665751    | 115.558955     | 124.467692     | 118.543068     | 5.923E-14 | -1.102452 | down      | PREDICTED: interferon-induced guanylate-binding protein 1 [Sesamum indicum]                |
| c46212.graph_c0 | 9.1786692     | 8.27444724    | 8.09322333    | 4.96150607     | 4.66240018     | 4.86939024     | 1.829E-26 | -1.833294 | down      | PREDICTED: protein root UVB sensitive 1, chloroplastic [Sesamum indicum]                   |
| c46212.graph_c1 | 3.87999963    | 3.157076      | 3.32396876    | 36.664844      | 48.8514001     | 48.062043      | 3.229E-38 | 2.666796  | up        | PREDICTED: heterogeneous nuclear ribonucleoprotein 1-like [Sesamum indicum]                |
| c46212.graph_c2 | 130.254003    | 133.060098    | 121.799553    | 31.9796291     | 41.528532      | 39.4998395     | 5.108E-81 | -2.789976 | down      | PREDICTED: ubiquinol oxidase 2, mitochondrial-like [Sesamum indicum]                       |
| c46213.graph_c1 | 22.4747594    | 20.6553832    | 21.9562821    | 30.149698      | 19.8822977     | 14.0060747     | 8.633E-05 | -1.029481 | down      | GAL83 [Nicotiana attenuata]                                                                |

| #ID             | 0 h-1<br>FPKM | 0 h-2<br>FPKM | 0 h-3<br>FPKM | 48 h-1<br>FPKM | 48 h-2<br>FPKM | 48 h-3<br>FPKM | FDR       | log2FC    | regulated | nr_annotation                                                                           |
|-----------------|---------------|---------------|---------------|----------------|----------------|----------------|-----------|-----------|-----------|-----------------------------------------------------------------------------------------|
| c46213.graph_c2 | 64.445769     | 67.0081753    | 59.7274448    | 40.3607249     | 41.4654689     | 45.6424299     | 1.432E-29 | -1.602516 | down      | PREDICTED: protein ETHYLENE INSENSITIVE 3-like [Sesamum indicum]                        |
| c46214.graph_c0 | 5.22047418    | 6.81613264    | 8.26411392    | 1.25463687     | 1.10761302     | 0.86828649     | 1.13E-14  | -3.668728 | down      | -                                                                                       |
| c46216.graph_c0 | 81.620852     | 78.0368933    | 81.3115571    | 64.3921434     | 69.0748074     | 65.3200323     | 4.893E-20 | -1.296103 | down      | PREDICTED: uncharacterized protein LOC105174095 isoform X1 [Sesamum indicum]            |
| c46218.graph_c0 | 0.96392878    | 0.69126735    | 0.7025387     | 0.1325424      | 0.11233008     | 0.07076126     | 1.308E-15 | -3.909423 | down      | hypothetical protein MIMGU_mgv1a020311mg [Erythranthe guttata]                          |
| c46221.graph_c0 | 1.26585852    | 1.50620648    | 1.65737036    | 0.24203973     | 0.13986095     | 0.03915736     | 7.8E-19   | -4.395149 | down      | hypothetical protein MIMGU_mgv1a023003mg, partial [Erythranthe guttata]                 |
| c46227.graph_c0 | 1.44304694    | 1.06212642    | 0.54540366    | 5.59142181     | 5.05355858     | 5.39271394     | 0.001099  | 1.386578  | up        | -                                                                                       |
| c46231.graph_c0 | 0.04575881    | 0.04580463    | 0             | 31.5326874     | 32.6011937     | 23.2562958     | 8.443E-47 | 8.899337  | up        | PREDICTED: vestitone reductase-like [Sesamum indicum]                                   |
| c46232.graph_c0 | 0.68352591    | 0.45614024    | 0.29278595    | 2.87866812     | 3.11313315     | 3.2818214      | 0.00034   | 1.682451  | up        | PREDICTED: uncharacterized protein LOC103980779 [Musa acuminata subsp. malaccensis]     |
| c46234.graph_c2 | 64.9349124    | 75.9587399    | 51.0114136    | 36.1089418     | 45.7568411     | 33.3626352     | 6.939E-11 | -1.75263  | down      | PREDICTED: uncharacterized protein LOC105177376 [Sesamum indicum]                       |
| c46234.graph_c3 | 0             | 0             | 0             | 5.91067337     | 6.11602216     | 5.13697275     | 5.406E-12 | Inf       | up        | -                                                                                       |
| c46236.graph_c0 | 101.023277    | 94.8997898    | 107.810409    | 19.7468076     | 16.3760862     | 9.96710976     | 3.45E-122 | -3.731186 | down      | PREDICTED: cytochrome P450 1B50-like [Sesamum indicum]                                  |
| c46237.graph_c0 | 81.7192519    | 88.312154     | 77.621328     | 587.651447     | 601.980709     | 671.75981      | 1.169E-34 | 1.892109  | up        | PREDICTED: ATP synthase subunit beta, mitochondrial-like [Sesamum indicum]              |
| c46239.graph_c0 | 0.22884524    | 0.13744464    | 0.02940752    | 9.25531257     | 11.3683021     | 12.512436      | 4.353E-53 | 5.379831  | up        | PREDICTED: subtilisin-like protease SB15.3 [Sesamum indicum]                            |
| c46242.graph_c0 | 0             | 0             | 0             | 3.75593609     | 4.73685579     | 6.5248754      | 1.922E-13 | Inf       | up        | unknown [Picea sitchensis]                                                              |
| c46243.graph_c0 | 2.37126989    | 2.27334952    | 1.9742265     | 8.49212538     | 8.60523029     | 10.0476118     | 0.0002975 | 1.018935  | up        | PREDICTED: serine/threonine-protein kinase TOUSLED isoform X2 [Sesamum indicum]         |
| c46243.graph_c2 | 170.124301    | 154.721201    | 168.292911    | 54.1411687     | 64.4020037     | 63.1116344     | 5.159E-59 | -2.461575 | down      | PREDICTED: probable phospholipid hydroperoxide glutathione peroxidase [Sesamum indicum] |
| c46246.graph_c0 | 24.3230999    | 23.9463445    | 23.0172939    | 109.160681     | 138.755363     | 147.124649     | 3.526E-18 | 1.448559  | up        | PREDICTED: serine carboxypeptidase-like 25 [Sesamum indicum]                            |
| c46247.graph_c0 | 37.8996991    | 40.8348492    | 34.403446     | 37.8703553     | 32.5036828     | 29.4807049     | 5.479E-18 | -1.19245  | down      | PREDICTED: UDP-glycosyltransferase 91C1-like [Sesamum indicum]                          |
| c46248.graph_c0 | 32.373241     | 28.5816922    | 28.8877631    | 137.886818     | 132.403792     | 144.571267     | 3.119E-17 | 1.190612  | up        | PREDICTED: nijmegen breakage syndrome 1 protein [Sesamum indicum]                       |
| c46249.graph_c2 | 6.22398768    | 3.36768652    | 3.45862512    | 0              | 0.32834691     | 0.55157063     | 2.151E-09 | -4.931474 | down      | -                                                                                       |
| c46249.graph_c6 | 11.7563845    | 14.7516331    | 11.9157112    | 0.76272875     | 1.45443352     | 0.40720287     | 2.057E-24 | -4.894664 | down      | -                                                                                       |
| c46250.graph_c0 | 0.86089941    | 1.16337798    | 1.2169188     | 11.4605361     | 12.1410483     | 10.9737976     | 2.208E-13 | 2.39486   | up        | PREDICTED: uncharacterized protein LOC105168273 [Sesamum indicum]                       |



| #ID             | 0 h-1<br>FPKM | 0 h-2<br>FPKM | 0 h-3<br>FPKM | 48 h-1<br>FPKM | 48 h-2<br>FPKM | 48 h-3<br>FPKM | FDR       | log2FC    | regulated | nr_annotation                                                                                        |
|-----------------|---------------|---------------|---------------|----------------|----------------|----------------|-----------|-----------|-----------|------------------------------------------------------------------------------------------------------|
| c46259.graph_c0 | 1.42853113    | 2.33993715    | 1.60208209    | 299.725785     | 211.2089       | 184.552557     | 8.722E-21 | 6.008591  | up        | PREDICTED: phosphoglycerate kinase, cytosolic-like [Sesamum indicum]                                 |
| c46264.graph_c0 | 11.326877     | 11.796057     | 12.3082014    | 8.22907178     | 10.9759041     | 10.34368       | 9.544E-14 | -1.285014 | down      | hypothetical protein L484_013876 [Morus notabilis]                                                   |
| c46268.graph_c0 | 1.60683248    | 1.68503393    | 1.44211281    | 6.17974391     | 7.26856763     | 6.12592699     | 0.0004044 | 1.029871  | up        | PREDICTED: trimethylguanosine synthase isoform X2 [Sesamum indicum]                                  |
| c46269.graph_c0 | 0             | 0.07531056    | 0.2900407     | 9.63431111     | 8.8112671      | 7.46243743     | 9.802E-17 | 5.11017   | up        | hypothetical protein MIMGU_mgv1a009279mg [Erythranthe guttata]                                       |
| c46271.graph_c0 | 3.34180549    | 3.24300977    | 3.73707       | 15.9104777     | 14.8136736     | 14.7425678     | 5.492E-09 | 1.121764  | up        | PREDICTED: serine/threonine-protein kinase Nek2 [Sesamum indicum]                                    |
| c46272.graph_c0 | 6.12378538    | 4.98055791    | 5.016683      | 0              | 0              | 0              | 2.244E-34 | -Inf      | down      | hypothetical protein S7711_01318 [Stachybotrys chartarum IBT 7711]                                   |
| c46273.graph_c1 | 36.0555233    | 38.9338431    | 34.2862534    | 20.1376242     | 22.4770157     | 17.8075019     | 6.407E-40 | -1.871853 | down      | hypothetical protein MIMGU_mgv1a002387mg [Erythranthe guttata]                                       |
| c46275.graph_c0 | 35.1155901    | 33.8258052    | 33.4657133    | 15.7584946     | 13.1831295     | 12.4081923     | 7.19E-59  | -2.321339 | down      | PREDICTED: DIS3-like exonuclease 2 [Sesamum indicum]                                                 |
| c46279.graph_c0 | 0.64643598    | 0.48531246    | 0.62302187    | 3.15635663     | 2.74442084     | 3.0469653      | 0.0025563 | 1.334088  | up        | BnaA04g06750D [Brassica napus]                                                                       |
| c46280.graph_c0 | 27.4148293    | 30.5477586    | 26.8083187    | 8.57431951     | 10.4119839     | 10.380106      | 6.426E-60 | -2.549773 | down      | PREDICTED: uncharacterized protein LOC105162504 [Sesamum indicum]                                    |
| c46282.graph_c0 | 20.1072363    | 19.2435909    | 18.0796966    | 16.5824783     | 17.8450859     | 17.5098767     | 2.693E-14 | -1.162739 | down      | PREDICTED: uncharacterized PKHD-type hydroxylase At1g22950 [Sesamum indicum]                         |
| c46288.graph_c0 | 24.90261      | 25.2628943    | 22.6732407    | 23.9706937     | 23.6139173     | 20.7187079     | 3.153E-13 | -1.107812 | down      | PREDICTED: magnesium transporter MRS2-1-like [Sesamum indicum]                                       |
| c46290.graph_c0 | 14.0633634    | 15.0561789    | 13.171813     | 12.1153681     | 14.1071068     | 13.1713249     | 1.728E-14 | -1.121235 | down      | PREDICTED: translation initiation factor IF-2, chloroplastic isoform X2 [Sesamum indicum]            |
| c46293.graph_c0 | 38.7463702    | 39.5814826    | 39.3273735    | 206.241727     | 228.809654     | 229.045573     | 2.796E-26 | 1.477348  | up        | hypothetical protein F0P1K_0010508070g [Propitius trichocarpal]                                      |
| c46294.graph_c0 | 34.9254048    | 38.3219521    | 47.4697891    | 51.0477649     | 23.5980729     | 14.8653799     | 0.00095   | -1.431998 | down      | -                                                                                                    |
| c46295.graph_c0 | 0.19398458    | 0.16643899    | 0.17805562    | 2.37430654     | 2.89393567     | 3.18032382     | 5.205E-09 | 2.950329  | up        | hypothetical protein MIMGU_mgv1a004572mg [Erythranthe guttata]                                       |
| c46297.graph_c0 | 0             | 0             | 0             | 7.91479969     | 23.9843437     | 5.15907085     | 0.0003292 | Inf       | up        | hypothetical protein CHELNDKAF1_50512 [Cniorena variabilis]                                          |
| c46302.graph_c0 | 0             | 0             | 0             | 2.83323012     | 2.13437423     | 1.23248455     | 2.335E-06 | Inf       | up        | -                                                                                                    |
| c46303.graph_c0 | 3.51617589    | 3.21789653    | 2.74728305    | 1.63409438     | 1.88016209     | 1.57597706     | 5.352E-34 | -1.913903 | down      | PREDICTED: saccin [Sesamum indicum]                                                                  |
| c46306.graph_c0 | 0             | 0             | 0             | 7.29354298     | 10.9774603     | 12.5046416     | 1.339E-25 | Inf       | up        | unnamed protein product [Coffea canephora]                                                           |
| c46307.graph_c0 | 27.9436035    | 28.797924     | 26.6618534    | 18.1890102     | 22.5991724     | 21.2484634     | 7.441E-25 | -1.447411 | down      | PREDICTED: LOW QUALITY PROTEIN: translocase of chloroplast 120, chloroplastic-like [Sesamum indicum] |
| c46308.graph_c0 | 3.0007704     | 2.83454844    | 2.87850372    | 19.974525      | 21.614323      | 21.8267519     | 6.955E-16 | 1.8447    | up        | PREDICTED: glycine--tRNA ligase 2, chloroplastic/mitochondrial isoform X1 [Cucumis melo]             |

| #ID             | 0 h-1<br>FPKM | 0 h-2<br>FPKM | 0 h-3<br>FPKM | 48 h-1<br>FPKM | 48 h-2<br>FPKM | 48 h-3<br>FPKM | FDR       | log2FC    | regulated | nr_annotation                                                                              |
|-----------------|---------------|---------------|---------------|----------------|----------------|----------------|-----------|-----------|-----------|--------------------------------------------------------------------------------------------|
| c46309.graph_c0 | 4.48997595    | 4.11196373    | 5.15598869    | 25.9188742     | 31.4204203     | 33.1253647     | 2.239E-17 | 1.693786  | up        | PREDICTED: persulfide dioxygenase ETHE1 homolog, mitochondrial [Sesamum indicum]           |
| c46314.graph_c0 | 30.6954798    | 32.321003     | 29.0377299    | 35.17711       | 25.6559275     | 21.3095083     | 2.06E-11  | -1.173014 | down      | PREDICTED: uncharacterized protein LOC105166052 [Sesamum indicum]                          |
| c46315.graph_c0 | 0.53551212    | 0.75940183    | 0.83151974    | 21.0084317     | 19.5991168     | 15.9495594     | 1.485E-31 | 3.715401  | up        | hypothetical protein MIMGU_mgv1a001332mg [Erythranthe guttata]                             |
| c46317.graph_c0 | 19.9311319    | 20.9376823    | 18.9136937    | 14.3061075     | 14.3646741     | 14.2376366     | 4.632E-24 | -1.495133 | down      | PREDICTED: LRR receptor-like serine/threonine-protein kinase RPK2 [Sesamum indicum]        |
| c46320.graph_c0 | 1.05642002    | 2.04673135    | 1.22616656    | 5.02318981     | 6.05316133     | 6.564731       | 0.0040616 | 1.006613  | up        | PREDICTED: MORC family CW-type zinc finger protein 3-like isoform X1 [Sesamum indicum]     |
| c46324.graph_c1 | 5.10169226    | 4.81288424    | 4.90511626    | 1.79209078     | 2.84775432     | 2.96353344     | 7.237E-20 | -1.98847  | down      | PREDICTED: kinesin-4-like [Sesamum indicum]                                                |
| c46327.graph_c0 | 14.571728     | 20.0680031    | 15.2066804    | 1.24676097     | 2.97946119     | 3.12168861     | 4.977E-29 | -3.792878 | down      | PREDICTED: high affinity nitrate transporter 2.4-like [Sesamum indicum]                    |
| c46328.graph_c0 | 1.56935355    | 1.90415154    | 1.99631092    | 20.5185469     | 22.0618058     | 24.7935157     | 3.885E-54 | 2.601086  | up        | PREDICTED: kinesin-13A [Sesamum indicum]                                                   |
| c46330.graph_c0 | 21.6713697    | 19.2910694    | 15.4178923    | 15.1292469     | 18.29635       | 14.9371911     | 8.214E-10 | -1.237755 | down      | PREDICTED: ATP-dependent helicase BRM isoform X1 [Sesamum indicum]                         |
| c46332.graph_c0 | 0.93237986    | 1.28059293    | 0.89164281    | 10.6072701     | 9.94622359     | 11.7489764     | 5.299E-22 | 2.363374  | up        | PREDICTED: uncharacterized protein LOC105162624 [Sesamum indicum]                          |
| c46334.graph_c0 | 25.8960103    | 25.3758781    | 25.0302118    | 16.8211727     | 19.4172153     | 20.5176715     | 1.612E-21 | -1.447187 | down      | PREDICTED: glycine-rich RNA-binding protein RZ1A [Populus euphratica]                      |
| c46335.graph_c1 | 19.7252948    | 21.1200054    | 17.1379759    | 17.2893669     | 16.913061      | 18.5393261     | 2.522E-16 | -1.152663 | down      | PREDICTED: phospholipid-transporting ATPase 1-like [Sesamum indicum]                       |
| c46342.graph_c0 | 2.41318285    | 2.37663801    | 2.70090189    | 1.25502178     | 1.63343903     | 1.91436143     | 3.917E-05 | -1.665913 | down      | PREDICTED: protein GAMETE EXPRESSED 3-like [Solanum tuberosum]                             |
| c46342.graph_c1 | 18.536616     | 15.897535     | 18.1133421    | 14.5422518     | 15.6413144     | 12.5834722     | 4.043E-13 | -1.314688 | down      | PREDICTED: zinc finger CCHC domain-containing protein 8 [Sesamum indicum]                  |
| c46345.graph_c0 | 1.21612964    | 1.58255164    | 1.40649726    | 0.28009449     | 0.29672615     | 0.04984528     | 3.178E-11 | -3.756675 | down      | -                                                                                          |
| c46346.graph_c0 | 39.7848791    | 38.4177762    | 39.9056616    | 39.5316061     | 35.9723177     | 37.2624412     | 2.061E-14 | -1.082786 | down      | PREDICTED: acyl-coenzyme A thioesterase 9, mitochondrial-like isoform X2 [Sesamum indicum] |
| c46348.graph_c0 | 8.25514268    | 6.34725615    | 7.84083252    | 56.1019496     | 52.5440978     | 43.6425028     | 1.016E-12 | 1.747375  | up        | PREDICTED: transmembrane protein 33 homolog [Sesamum indicum]                              |
| c46350.graph_c0 | 4.14487504    | 4.35910274    | 4.51726596    | 38.8619937     | 41.7328353     | 43.912103      | 1.15E-30  | 2.237376  | up        | PREDICTED: uncharacterized protein LOC105177167 [Sesamum indicum]                          |
| c46351.graph_c0 | 21.1344624    | 22.2418556    | 19.7547426    | 19.3752353     | 18.5336593     | 16.456333      | 7.416E-17 | -1.230369 | down      | PREDICTED: chromodomain-helicase-DNA-binding protein 1-like isoform X2 [Sesamum indicum]   |
| c46352.graph_c0 | 17.3037824    | 15.1401669    | 18.1377962    | 7.33070437     | 10.1081171     | 11.4666975     | 6.35E-25  | -1.832427 | down      | PREDICTED: CDP-diacylglycerol--serine O-phosphatidyltransferase 1-like [Sesamum indicum]   |

| #ID             | 0 h-1<br>FPKM | 0 h-2<br>FPKM | 0 h-3<br>FPKM | 48 h-1<br>FPKM | 48 h-2<br>FPKM | 48 h-3<br>FPKM | FDR       | log2FC    | regulated | nr_annotation                                                                            |
|-----------------|---------------|---------------|---------------|----------------|----------------|----------------|-----------|-----------|-----------|------------------------------------------------------------------------------------------|
| c46354.graph_c0 | 83.8131888    | 79.9199658    | 97.8790633    | 3.12256835     | 3.62040311     | 3.19520892     | 6.129E-97 | -5.739575 | down      | PREDICTED: uncharacterized protein LOC105172385 [Sesamum indicum]                        |
| c46354.graph_c1 | 6.14009796    | 5.77499656    | 7.20185625    | 0.87317551     | 1.52829982     | 1.55389263     | 6.859E-25 | -3.30225  | down      | PREDICTED: pentatricopeptide repeat-containing protein At4g22760 [Sesamum indicum]       |
| c46355.graph_c0 | 64.4795694    | 65.6111541    | 65.9915949    | 48.484996      | 46.8966547     | 43.5014573     | 3.033E-26 | -1.513953 | down      | PREDICTED: fimbrin-2 [Sesamum indicum]                                                   |
| c46360.graph_c0 | 14.0195403    | 14.0785582    | 12.1836705    | 6.12668531     | 6.57818938     | 7.36687534     | 1.562E-22 | -2.023088 | down      | unnamed protein product [Coffea canephora]                                               |
| c46360.graph_c1 | 19.5923747    | 19.1431809    | 19.0582696    | 10.2114257     | 12.265215      | 10.3657926     | 1.633E-16 | -1.834851 | down      | PREDICTED: mitochondrial ubiquitin ligase activator of NFKB 1 [Sesamum indicum]          |
| c46363.graph_c0 | 1.71102938    | 1.80012755    | 1.43591216    | 8.01023787     | 8.55403538     | 7.55682664     | 1.82E-08  | 1.269921  | up        | PREDICTED: transcription termination factor 2 [Sesamum indicum]                          |
| c46364.graph_c0 | 0             | 0.05099425    | 0.03273204    | 3.02712891     | 3.03285949     | 3.09024126     | 4.257E-18 | 5.748671  | up        | PREDICTED: uncharacterized protein LOC105172001 isoform X1 [Sesamum indicum]             |
| c46365.graph_c0 | 14.5925212    | 14.5475124    | 14.5423421    | 9.90435349     | 11.4516062     | 11.7667204     | 2.894E-17 | -1.419564 | down      | PREDICTED: CDK5RAP3-like protein [Sesamum indicum]                                       |
| c46368.graph_c2 | 1.65880447    | 1.71490701    | 1.15317657    | 0              | 0              | 0              | 1.049E-29 | -Inf      | down      | PREDICTED: uncharacterized protein LOC104097920 [Nicotiana tomentosiformis]              |
| c46368.graph_c3 | 63.8863421    | 64.8428042    | 59.6003692    | 29.0174341     | 31.8281662     | 30.2328944     | 1.421E-46 | -2.066074 | down      | PREDICTED: LOW QUALITY PROTEIN: nuclear pore complex protein NUP1-like [Sesamum indicum] |
| c46369.graph_c0 | 20.9958161    | 20.5922576    | 19.2587759    | 15.695604      | 15.592677      | 14.7771484     | 9.876E-13 | -1.41751  | down      | PREDICTED: retrovirus-related Pol polyprotein from transposon TNT 1-94 [Sesamum indicum] |
| c46371.graph_c0 | 7.04244905    | 6.74370073    | 7.41755133    | 4.53268677     | 6.52798078     | 7.77634929     | 5.36E-12  | -1.196633 | down      | PREDICTED: uncharacterized protein LOC105180200 [Sesamum indicum]                        |
| c46372.graph_c1 | 69.8299143    | 77.8195245    | 81.8511504    | 69.3495464     | 70.4459262     | 63.774669      | 1.057E-16 | -1.191248 | down      | hypothetical protein MIMGU_mgv1a026333mg, partial [Erythranthe guttata]                  |
| c46373.graph_c0 | 0             | 0             | 0.0963358     | 4.21294429     | 3.7314473      | 3.62574586     | 4.246E-12 | 5.860907  | up        | PREDICTED: uncharacterized protein LOC104110773 [Nicotiana tomentosiformis]              |
| c46375.graph_c0 | 17.5890931    | 17.022043     | 15.740387     | 7.8868736      | 7.98058725     | 6.97665357     | 3.889E-47 | -2.155769 | down      | PREDICTED: ubiquitin carboxyl-terminal hydrolase 8-like [Sesamum indicum]                |
| c46380.graph_c0 | 5.10847992    | 4.67528712    | 3.65741942    | 3.56331486     | 2.70653209     | 2.75185551     | 5.061E-05 | -1.584033 | down      | -                                                                                        |
| c46382.graph_c0 | 6.84045399    | 3.22801459    | 4.77185228    | 0              | 0              | 0              | 1.6E-15   | -Inf      | down      | -                                                                                        |
| c46385.graph_c0 | 0.6459963     | 0.43109545    | 0.79938524    | 9.34580689     | 13.1932153     | 12.9052466     | 1.183E-28 | 3.211888  | up        | PREDICTED: uncharacterized protein LOC105177282 [Sesamum indicum]                        |
| c46386.graph_c0 | 2.77812002    | 1.80979329    | 1.41666437    | 0              | 0              | 0              | 7.205E-17 | -Inf      | down      | --                                                                                       |
| c46387.graph_c0 | 0             | 0             | 0             | 1.39182676     | 4.34262208     | 0.5428774      | 0.0025989 | Inf       | up        | -                                                                                        |
| c46388.graph_c0 | 13.0316093    | 12.525181     | 13.7451675    | 90.0152028     | 99.9185728     | 101.176346     | 5.774E-40 | 1.86865   | up        | hypothetical protein MIMGU_mgv1a008721mg [Erythranthe guttata]                           |
| c46390.graph_c0 | 2.3626663     | 1.91215365    | 2.77772657    | 10.1885384     | 11.3331971     | 11.4969562     | 8.966E-05 | 1.204846  | up        | hypothetical protein PHAVU_0110040900g [Phaseolus vulgaris]                              |

| #ID             | 0 h-1<br>FPKM | 0 h-2<br>FPKM | 0 h-3<br>FPKM | 48 h-1<br>FPKM | 48 h-2<br>FPKM | 48 h-3<br>FPKM | FDR       | log2FC    | regulated | nr_annotation                                                                                        |
|-----------------|---------------|---------------|---------------|----------------|----------------|----------------|-----------|-----------|-----------|------------------------------------------------------------------------------------------------------|
| c46391.graph_c0 | 70.1259689    | 67.290978     | 59.8748322    | 20.113667      | 19.496174      | 16.246636      | 5.732E-86 | -2.834414 | down      | hypothetical protein MIMGU_mgv1a003239mg<br>[Erythranthe guttata]                                    |
| c46392.graph_c0 | 89.0341303    | 90.9149978    | 91.0031045    | 51.1719418     | 53.6469491     | 49.2479749     | 1.837E-37 | -1.832324 | down      | PREDICTED: tobamovirus multiplication protein 1<br>[Sesamum indicum]                                 |
| c46392.graph_c1 | 18.1681775    | 16.1954412    | 16.8588669    | 16.3148627     | 14.8571928     | 15.3320687     | 6.605E-12 | -1.154857 | down      | PREDICTED: TBC1 domain family member 13-like<br>[Sesamum indicum]                                    |
| c46394.graph_c0 | 2.28902889    | 3.27331572    | 3.99202588    | 1.28034451     | 2.63295305     | 1.13924284     | 6.361E-05 | -1.949931 | down      | -                                                                                                    |
| c46398.graph_c0 | 0.1280409     | 0.08544608    | 0.10969175    | 3.89266774     | 5.33179405     | 4.54825662     | 6.44E-14  | 4.391485  | up        | PREDICTED: squalene synthase-like [Sesamum indicum]                                                  |
| c46400.graph_c0 | 0.32591014    | 0.23561524    | 0.37227328    | 6.27188221     | 6.32622057     | 6.84227366     | 2.764E-26 | 3.358854  | up        | PREDICTED: flavin-containing monooxygenase FMO GS-<br>OX-like 2 isoform X1 [Sesamum indicum]         |
| c46401.graph_c0 | 7.2657167     | 4.94563471    | 5.60204018    | 3.48069911     | 5.67289023     | 4.76477713     | 0.0055993 | -1.379509 | down      | -                                                                                                    |
| c46401.graph_c4 | 40.3328396    | 41.6413163    | 39.1579569    | 36.1163351     | 36.7571751     | 33.3710221     | 2.425E-17 | -1.205772 | down      | PREDICTED: transcription factor HBP-1b(c1)-like isoform<br>X1 [Sesamum indicum]                      |
| c46401.graph_c5 | 29.3382453    | 29.3676231    | 27.239682     | 14.5124954     | 16.1996911     | 16.8564027     | 3.944E-29 | -1.872411 | down      | -                                                                                                    |
| c46403.graph_c0 | 18.3709167    | 18.5904106    | 15.4609532    | 9.06889265     | 10.4788109     | 9.56988738     | 2.989E-34 | -1.865926 | down      | PREDICTED: LOW QUALITY PROTEIN: uncharacterized<br>protein LOC105173575 [Sesamum indicum]            |
| c46404.graph_c0 | 23.3969713    | 24.9736908    | 23.9803169    | 18.3058128     | 18.1733641     | 15.9414889     | 6.366E-25 | -1.481163 | down      | PREDICTED: kanadaplin [Sesamum indicum]                                                              |
| c46405.graph_c0 | 3.15686282    | 2.56218157    | 2.30244778    | 2.20088168     | 2.08175649     | 2.4479141      | 0.0062799 | -1.268163 | down      | PREDICTED: uncharacterized protein LOC101504607,<br>partial [Cicer arietinum]                        |
| c46405.graph_c1 | 60.5520054    | 59.3129529    | 55.7675971    | 28.3090714     | 27.8396551     | 27.2856572     | 7.436E-48 | -2.089967 | down      | PREDICTED: protein RTF2 homolog [Sesamum indicum]                                                    |
| c46407.graph_c0 | 142.081968    | 140.840865    | 136.576304    | 106.15908      | 102.892748     | 111.506695     | 2.088E-23 | -1.40513  | down      | PREDICTED: ras-related protein RAP1D [Sesamum<br>indicum]                                            |
| c46408.graph_c1 | 1.63259619    | 1.34583728    | 1.91283744    | 14.1115664     | 12.3719946     | 13.4617063     | 4.476E-11 | 2.011669  | up        | PREDICTED: phosphoglycerate mutase-like protein 4<br>[Sesamum indicum]                               |
| c46411.graph_c0 | 15.918535     | 17.1278057    | 15.2293179    | 6.39583293     | 8.0417587      | 6.55324242     | 1.358E-35 | -2.221106 | down      | PREDICTED: pentatricopeptide repeat-containing protein<br>At1g80150, mitochondrial [Sesamum indicum] |
| c46412.graph_c0 | 1.83850493    | 1.86955776    | 1.65003606    | 10.135619      | 10.1393515     | 9.35352157     | 5.169E-08 | 1.45161   | up        | PREDICTED: uncharacterized protein LOC105174617<br>[Sesamum indicum]                                 |
| c46413.graph_c0 | 11.2996115    | 10.4929875    | 8.79027131    | 8.8828613      | 9.09132073     | 8.7268425      | 3.431E-13 | -1.210993 | down      | PREDICTED: serine racemase isoform A1 [Sesamum<br>indicum]                                           |
| c46416.graph_c0 | 616.78973     | 611.26002     | 629.19279     | 249.384401     | 279.430503     | 310.439193     | 7.242E-37 | -2.166597 | down      | PREDICTED: xylose isomerase-like [Sesamum indicum]                                                   |
| c46430.graph_c0 | 0.62881709    | 0.68666918    | 0.36729766    | 73.2033789     | 91.2190067     | 109.840728     | 1.985E-51 | 6.331246  | up        | PREDICTED: baicalein 7-O-glucuronosyltransferase-like<br>[Sesamum indicum]                           |
| c46432.graph_c0 | 0             | 0             | 0             | 1.93933111     | 2.34798417     | 2.13646353     | 1.128E-10 | Inf       | up        | --                                                                                                   |
| c46434.graph_c0 | 0.30644173    | 0.10224953    | 0.42004241    | 1.59977995     | 2.47237455     | 2.12683849     | 1.978E-05 | 1.87138   | up        | PREDICTED: putative ion channel POLLUX-like 2 isoform<br>X4 [Sesamum indicum]                        |
| c46435.graph_c0 | 5.03191463    | 4.57255338    | 4.08150814    | 2.23567022     | 0.80108375     | 0.87762614     | 1.086E-17 | -2.800639 | down      | PREDICTED: putative beta-glucosidase 41 isoform X1<br>[Sesamum indicum]                              |

| #ID             | 0 h-1<br>FPKM | 0 h-2<br>FPKM | 0 h-3<br>FPKM | 48 h-1<br>FPKM | 48 h-2<br>FPKM | 48 h-3<br>FPKM | FDR       | log2FC    | regulated | nr_annotation                                                                           |
|-----------------|---------------|---------------|---------------|----------------|----------------|----------------|-----------|-----------|-----------|-----------------------------------------------------------------------------------------|
| c46436.graph_c0 | 10.6985563    | 10.2197027    | 10.9984547    | 53.1108801     | 60.8289458     | 60.6633047     | 1.883E-22 | 1.431245  | up        | PREDICTED: cyprosin-like [Sesamum indicum]                                              |
| c46439.graph_c0 | 219.066072    | 233.960244    | 228.421032    | 54.0530916     | 71.5705261     | 69.6800714     | 9.893E-75 | -2.825497 | down      | PREDICTED: uncharacterized protein LOC105159071 [Sesamum indicum]                       |
| c46440.graph_c0 | 24.9885251    | 27.6370659    | 24.3469561    | 11.943672      | 12.535716      | 13.6286662     | 2.592E-44 | -2.03256  | down      | PREDICTED: uncharacterized protein DDB_G0271670 isoform X1 [Sesamum indicum]            |
| c46442.graph_c0 | 0             | 0             | 0.04533257    | 4.58244922     | 6.64487953     | 6.13061263     | 1.873E-25 | 7.524748  | up        | PREDICTED: heat stress transcription factor C-1-like [Sesamum indicum]                  |
| c46445.graph_c0 | 53.0146281    | 54.763369     | 53.855738     | 17.3398343     | 17.1448218     | 16.2517539     | 1.909E-64 | -2.68846  | down      | PREDICTED: DNA-directed RNA polymerase III subunit RPC9-like [Sesamum indicum]          |
| c46448.graph_c1 | 80.2274773    | 88.015929     | 81.8090286    | 41.0798782     | 43.3443741     | 41.5437506     | 6.217E-45 | -2.007146 | down      | hypothetical protein MIMGU_mgv1a021536mg, partial [Erythranthe guttata]                 |
| c46448.graph_c2 | 194.303433    | 192.913263    | 192.615114    | 172.858455     | 143.832752     | 130.031492     | 3.291E-20 | -1.389107 | down      | PREDICTED: pentatricopeptide repeat-containing protein At4g21065-like [Sesamum indicum] |
| c46450.graph_c0 | 3.20957617    | 3.23125439    | 3.31850887    | 24.1987597     | 29.6142183     | 26.9148885     | 1.241E-36 | 2.027328  | up        | PREDICTED: probable metal-nicotianamine transporter YSL7 [Sesamum indicum]              |
| c46452.graph_c0 | 27.9603367    | 30.4089475    | 29.3915016    | 18.6577876     | 20.7490299     | 17.4688343     | 4.175E-24 | -1.644187 | down      | PREDICTED: TATA-box-binding protein-like isoform X4 [Sesamum indicum]                   |
| c46453.graph_c0 | 1.32540352    | 1.71369384    | 1.987062      | 0.05087701     | 0.37728614     | 0.36216044     | 3.356E-11 | -3.71356  | down      | acidic class III chitinase [Rehmannia glutinosa]                                        |
| c46454.graph_c0 | 18.3829866    | 20.823987     | 18.5939083    | 6.30934353     | 6.18142921     | 4.55874978     | 5.029E-44 | -2.775752 | down      | PREDICTED: kinesin-like protein KIF3A isoform X1 [Sesamum indicum]                      |
| c46456.graph_c0 | 3.4420495     | 3.90489568    | 3.70703761    | 17.4105224     | 24.2191906     | 31.9912608     | 1.717E-05 | 1.709975  | up        | PREDICTED: purple acid phosphatase 15 isoform X2 [Sesamum indicum]                      |
| c46459.graph_c0 | 20.2472482    | 15.3482211    | 21.7241974    | 10.1414835     | 7.67405143     | 8.2181318      | 1.929E-09 | -2.152883 | down      | -                                                                                       |
| c46459.graph_c1 | 12.7457258    | 13.2310253    | 14.8116585    | 5.50868358     | 4.95273628     | 6.03024992     | 1.525E-30 | -2.324916 | down      | PREDICTED: putative lipid phosphate phosphatase 3, chloroplastic [Sesamum indicum]      |
| c46462.graph_c0 | 4.48746923    | 5.98928366    | 4.08465773    | 1.37804978     | 2.18981497     | 2.06917944     | 5.995E-08 | -2.392349 | down      | -                                                                                       |
| c46462.graph_c2 | 3.59510361    | 2.29704483    | 2.01504116    | 0.88086275     | 1.38108756     | 1.72433003     | 2.946E-05 | -2.010226 | down      | PREDICTED: restin homolog [Sesamum indicum]                                             |
| c46463.graph_c0 | 1.00365875    | 1.64764857    | 0.82543439    | 5.54781544     | 5.13278763     | 4.77186572     | 0.0053254 | 1.140565  | up        | PREDICTED: uncharacterized protein LOC105170218 [Sesamum indicum]                       |
| c46468.graph_c0 | 4.39359714    | 3.17471282    | 3.62686615    | 1.09903575     | 2.44218        | 2.31360473     | 2.113E-10 | -1.964516 | down      | hypothetical protein MIMGU_mgv1a003714mg [Erythranthe guttata]                          |
| c46470.graph_c0 | 1.60120634    | 1.14486408    | 1.69018255    | 13.4342717     | 13.0599363     | 14.1569715     | 9.52E-11  | 2.176523  | up        | hypothetical protein MIMGU_mgv1a002711mg [Erythranthe guttata]                          |
| c46471.graph_c0 | 52.0607448    | 49.9500884    | 48.1918836    | 3.03315439     | 3.66512387     | 3.41577321     | 4.25E-167 | -4.912277 | down      | hypothetical protein AMTR_s00109p00039350 [Amborella trichopoda]                        |
| c46472.graph_c1 | 12.7187652    | 12.7719186    | 14.1389582    | 13.0006855     | 13.0239222     | 11.898917      | 3.899E-12 | -1.081405 | down      | PREDICTED: uncharacterized protein LOC105165093 [Sesamum indicum]                       |

| #ID             | 0 h-1<br>FPKM | 0 h-2<br>FPKM | 0 h-3<br>FPKM | 48 h-1<br>FPKM | 48 h-2<br>FPKM | 48 h-3<br>FPKM | FDR       | log2FC    | regulated | nr_annotation                                                                                     |
|-----------------|---------------|---------------|---------------|----------------|----------------|----------------|-----------|-----------|-----------|---------------------------------------------------------------------------------------------------|
| c46473.graph_c1 | 1.0615993     | 0.62972583    | 0.55578402    | 3.83961255     | 4.64320825     | 3.59373353     | 3.985E-05 | 1.411955  | up        | PREDICTED: sulfate transporter 1.5-like [Sesamum indicum]                                         |
| c46474.graph_c0 | 0.56489301    | 0             | 1.08886483    | 5.46437105     | 4.27271416     | 5.32522778     | 7.209E-05 | 2.158386  | up        | PREDICTED: non-specific lipid-transfer protein 1-like [Pyrus x bretschneideri]                    |
| c46477.graph_c0 | 1.17490262    | 1.17607911    | 0.75489819    | 9.38077339     | 11.0080157     | 9.59899912     | 1.888E-11 | 2.256268  | up        | PREDICTED: UPR0554 protein isoform A2 [Sesamum indicum]                                           |
| c46478.graph_c0 | 5.64172623    | 4.89947988    | 5.58433743    | 21.5908047     | 24.9562472     | 24.7985391     | 4.185E-14 | 1.124946  | up        | PREDICTED: ultraviolet-B receptor UVR8 isoform X1 [Sesamum indicum]                               |
| c46479.graph_c0 | 4.27347372    | 3.97219917    | 3.35596734    | 19.8099978     | 25.3556761     | 23.2151296     | 3.896E-15 | 1.540144  | up        | hypothetical protein MIMGU_mgv1a004800mg [Erythranthe guttata]                                    |
| c46484.graph_c0 | 1.407838      | 2.18748903    | 1.21508568    | 42.2393577     | 49.4847222     | 52.1392101     | 1.27E-115 | 3.884821  | up        | PREDICTED: formin-like protein 1 [Nelumbo nucifera]                                               |
| c46485.graph_c0 | 2.54937237    | 1.6769794     | 1.26361714    | 0.06710423     | 0.31989959     | 0.41796259     | 1.94E-08  | -3.802642 | down      | PREDICTED: heat shock protein 81-1 [Musa acuminata subsp. malaccensis]                            |
| c46486.graph_c0 | 9.37174301    | 10.3299819    | 8.50368798    | 4.05330113     | 5.98713619     | 5.86439507     | 2.757E-28 | -1.84943  | down      | PREDICTED: uncharacterized protein LOC105176969 [Sesamum indicum]                                 |
| c46488.graph_c0 | 32.5373723    | 33.8236084    | 31.8336271    | 19.1298927     | 20.6813851     | 19.4239972     | 5.99E-34  | -1.747244 | down      | PREDICTED: pentatricopeptide repeat-containing protein At5g67570, chloroplastic [Sesamum indicum] |
| c46488.graph_c1 | 19.0863946    | 21.3799718    | 18.6870649    | 3.55859211     | 7.53979367     | 9.49924157     | 3.4E-11   | -2.552254 | down      | -                                                                                                 |
| c46488.graph_c2 | 34.2171521    | 37.567284     | 34.876408     | 10.1609023     | 17.7812084     | 23.0810584     | 1.951E-42 | -2.092212 | down      | PREDICTED: F-box/kelch-repeat protein SKIP11-like isoform X1 [Sesamum indicum]                    |
| c46489.graph_c0 | 12.7370054    | 11.5805676    | 10.8997918    | 5.66211657     | 6.75829484     | 5.19769565     | 3.234E-29 | -2.016873 | down      | PREDICTED: ar1-associated corepressor [Sesamum indicum]                                           |
| c46492.graph_c0 | 10.7156424    | 13.1484566    | 9.92034038    | 8.2796989      | 9.67096133     | 9.3507103      | 1.546E-08 | -1.325883 | down      | PREDICTED: LOW QUALITY PROTEIN: uncharacterized protein LOC105176443 [Sesamum indicum]            |
| c46492.graph_c1 | 7.17522905    | 7.84935239    | 5.59813242    | 4.9105004      | 7.27790965     | 6.34393647     | 4.09E-08  | -1.174987 | down      | PREDICTED: LOW QUALITY PROTEIN: uncharacterized protein LOC105176443 [Sesamum indicum]            |
| c46493.graph_c0 | 21.072462     | 22.2695106    | 19.7666885    | 88.2731393     | 99.4265355     | 102.409319     | 8.67E-17  | 1.181692  | up        | PREDICTED: probable receptor-like protein kinase At1g67000 [Sesamum indicum]                      |
| c46493.graph_c1 | 0.70953726    | 1.04993146    | 1.38749658    | 6.53672001     | 8.97221281     | 8.6233476      | 5.219E-10 | 1.910174  | up        | PREDICTED: uncharacterized protein LOC105170658 [Sesamum indicum]                                 |
| c46496.graph_c0 | 0.17937402    | 0.29925607    | 0.30733696    | 1.79021971     | 1.77981174     | 1.5439136      | 0.0009705 | 1.682115  | up        | PREDICTED: pentatricopeptide repeat-containing protein At3g12770 [Sesamum indicum]                |
| c46499.graph_c1 | 0.24637613    | 0.57545329    | 0.36937026    | 6.58235502     | 9.57814064     | 9.7952271      | 8.704E-17 | 3.421053  | up        | PREDICTED: probable serine incorporator [Sesamum indicum]                                         |
| c46501.graph_c0 | 70.039327     | 65.1664263    | 65.9015167    | 49.5830906     | 48.1942144     | 46.012722      | 3.607E-26 | -1.500108 | down      | MADS box protein [Paulownia kawakamii]                                                            |
| c46502.graph_c0 | 1.48035784    | 1.39111528    | 1.68879289    | 10.4929271     | 10.039768      | 9.31177808     | 7.855E-18 | 1.692585  | up        | PREDICTED: uncharacterized protein ycf39 isoform X2 [Nicotiana glauca]                            |
| c46504.graph_c0 | 19.0700761    | 17.1340034    | 17.1648575    | 14.4341124     | 14.1433276     | 13.5320399     | 6.015E-20 | -1.357781 | down      | PREDICTED: uncharacterized protein LOC105157171 isoform X1 [Sesamum indicum]                      |
| c46506.graph_c0 | 2.8602521     | 2.12265512    | 1.90113992    | 0              | 0              | 0              | 1.108E-26 | -Inf      | down      | putative Trypsin [Glarea lozoyensis 74030]                                                        |

| #ID             | 0 h-1<br>FPKM | 0 h-2<br>FPKM | 0 h-3<br>FPKM | 48 h-1<br>FPKM | 48 h-2<br>FPKM | 48 h-3<br>FPKM | FDR       | log2FC    | regulated | nr_annotation                                                                                                             |
|-----------------|---------------|---------------|---------------|----------------|----------------|----------------|-----------|-----------|-----------|---------------------------------------------------------------------------------------------------------------------------|
| c46507.graph_c0 | 50.8021785    | 56.2191993    | 54.3379608    | 35.4017249     | 31.416185      | 29.5699794     | 2.078E-35 | -1.758245 | down      | PREDICTED: mitogen-activated protein kinase kinase kinase YODA-like [Sesamum indicum]                                     |
| c46508.graph_c0 | 154.12016     | 149.047117    | 154.001047    | 101.770699     | 96.1829019     | 98.5676971     | 2.216E-29 | -1.641215 | down      | hypothetical protein VITISV_004365 [Vitis vinifera]                                                                       |
| c46509.graph_c0 | 0.11284093    | 0.22590785    | 0.09667004    | 1.10886856     | 0.86879726     | 0.89416478     | 0.0005844 | 1.712983  | up        | PREDICTED: probable LRR receptor-like serine/threonine-protein kinase At3g47570 [Solanum lycopersicum]                    |
| c46518.graph_c0 | 68.9973951    | 67.0993531    | 70.4304216    | 25.5029396     | 30.6417244     | 34.3493108     | 1.927E-50 | -2.212452 | down      | PREDICTED: uncharacterized protein LOC105175391 [Sesamum indicum]                                                         |
| c46523.graph_c1 | 1.05373545    | 0.86048707    | 0.78394787    | 18.2402541     | 18.0242896     | 18.2986066     | 1.162E-44 | 3.32302   | up        | PREDICTED: glutathione synthetase, chloroplastic isoform X2 [Sesamum indicum]                                             |
| c46525.graph_c1 | 31.4372141    | 33.0560381    | 29.5160067    | 7.51536351     | 10.2591569     | 8.91169999     | 2.173E-84 | -2.838068 | down      | PREDICTED: Ion protease homolog 2, peroxisomal [Sesamum indicum]                                                          |
| c46529.graph_c0 | 0.63351753    | 0.34146641    | 1.12720861    | 2.82839792     | 3.66219901     | 3.63522101     | 0.0054862 | 1.236628  | up        | PREDICTED: uncharacterized protein LOC105164965 [Sesamum indicum]                                                         |
| c46536.graph_c0 | 1.26075889    | 1.5324545     | 1.08008339    | 7.30081517     | 9.02338314     | 9.00612518     | 1.679E-08 | 1.690218  | up        | zeaxanthin epoxidase [Scutellaria baicalensis]                                                                            |
| c46537.graph_c0 | 0.23128401    | 0.08681835    | 0.03715114    | 1.01210111     | 0.84647242     | 0.94795945     | 0.0007721 | 1.980293  | up        | hypothetical protein MIMGU_mgv1a001125mg [Erythranthe guttata]                                                            |
| c46540.graph_c0 | 11.6547932    | 11.5366921    | 12.3446731    | 12.3853508     | 11.9693881     | 11.5623981     | 1.005E-11 | -1.001767 | down      | PREDICTED: L-ascorbate oxidase homolog [Sesamum indicum]                                                                  |
| c46540.graph_c1 | 2.02336532    | 0.31159868    | 1.80007238    | 8.02978017     | 8.50657843     | 9.56899568     | 0.0011276 | 1.635901  | up        | PREDICTED: L-ascorbate oxidase homolog [Tarenaya hassleriana]                                                             |
| c46542.graph_c0 | 17.0487352    | 15.439336     | 15.7689895    | 14.2318366     | 16.6863708     | 16.579714      | 1.101E-11 | -1.042767 | down      | hypothetical protein MIMGU_mgv1a012248mg [Erythranthe guttata]                                                            |
| c46544.graph_c0 | 0             | 0             | 0.11429162    | 1.27003079     | 1.90966191     | 1.40346876     | 1.765E-11 | 4.270144  | up        | PREDICTED: phosphatidylinositol 4-phosphate 5-kinase 6 [Sesamum indicum]                                                  |
| c46547.graph_c0 | 2.21648948    | 1.69943665    | 1.81804898    | 0.78203285     | 0.78244293     | 0.50255698     | 1.369E-07 | -2.485021 | down      | PREDICTED: NAC domain-containing protein 7 [Sesamum indicum]                                                              |
| c46550.graph_c2 | 0             | 0             | 0             | 2.43269236     | 4.08260211     | 3.47192471     | 2.672E-22 | Inf       | up        | PREDICTED: uncharacterized protein LOC105175473 [Sesamum indicum]                                                         |
| c46552.graph_c0 | 15.7998193    | 16.7733349    | 15.8422671    | 14.5054579     | 17.3943342     | 14.789121      | 7.255E-12 | -1.071899 | down      | PREDICTED: serine/threonine protein phosphatase 2A 31 kDa regulatory subunit B&apos; theta isoform-like [Sesamum indicum] |
| c46552.graph_c1 | 141.748757    | 144.262824    | 143.286029    | 71.9297962     | 56.0551328     | 52.0916545     | 1.028E-56 | -2.265197 | down      | PREDICTED: uncharacterized protein LOC105165908 isoform X2 [Sesamum indicum]                                              |
| c46558.graph_c0 | 31.4553008    | 30.3819986    | 32.3167843    | 20.8079958     | 16.1191044     | 15.9298621     | 5.214E-33 | -1.845539 | down      | -                                                                                                                         |
| c46560.graph_c0 | 1.82739429    | 1.52935134    | 2.27128143    | 13.1369353     | 12.8059698     | 12.1803075     | 5.583E-13 | 1.740242  | up        | hypothetical protein L484_026123 [Morus notabilis]                                                                        |
| c46564.graph_c0 | 4.22969034    | 3.38197726    | 2.75080197    | 13.1156096     | 15.3794877     | 15.200846      | 1.869E-07 | 1.059527  | up        | PREDICTED: probable methyltransferase PMT28 isoform X2 [Sesamum indicum]                                                  |
| c46566.graph_c0 | 0             | 0             | 0             | 3.50121367     | 5.71403638     | 8.25149105     | 1.183E-08 | Inf       | up        | -                                                                                                                         |

| #ID             | 0 h-1<br>FPKM | 0 h-2<br>FPKM | 0 h-3<br>FPKM | 48 h-1<br>FPKM | 48 h-2<br>FPKM | 48 h-3<br>FPKM | FDR       | log2FC    | regulated | nr_annotation                                                                      |
|-----------------|---------------|---------------|---------------|----------------|----------------|----------------|-----------|-----------|-----------|------------------------------------------------------------------------------------|
| c46568.graph_c0 | 31.5271648    | 32.5024765    | 31.6694659    | 16.5896297     | 17.9795633     | 17.8991063     | 8.25E-40  | -1.88591  | down      | PREDICTED: uncharacterized protein LOC105175670 isoform X1 [Sesamum indicum]       |
| c46569.graph_c0 | 3.14319745    | 2.81762229    | 3.37599191    | 0.51863615     | 0.73257615     | 0.26919627     | 1.232E-15 | -3.638204 | down      | PREDICTED: U-box domain-containing protein 33 [Sesamum indicum]                    |
| c46569.graph_c1 | 1.85324107    | 2.66670167    | 1.04190107    | 0.26676977     | 0.11304409     | 0.28484417     | 2.439E-06 | -4.068364 | down      | PREDICTED: U-box domain-containing protein 33 [Sesamum indicum]                    |
| c46571.graph_c1 | 0.99602202    | 1.20153618    | 1.41120237    | 5.10562303     | 5.58326556     | 6.25964446     | 7.715E-05 | 1.208493  | up        | PREDICTED: uncharacterized protein LOC105165701 isoform X1 [Sesamum indicum]       |
| c46572.graph_c0 | 722.003728    | 756.032668    | 673.132973    | 317.89303      | 139.090893     | 105.05462      | 1.873E-73 | -2.933072 | down      | PREDICTED: short-chain type dehydrogenase/reductase [Sesamum indicum]              |
| c46573.graph_c0 | 20.5928927    | 19.2796978    | 17.5120693    | 10.6296288     | 16.0784166     | 15.8629314     | 2.26E-20  | -1.454065 | down      | PREDICTED: uncharacterized protein LOC105161259 isoform X2 [Sesamum indicum]       |
| c46574.graph_c0 | 196.454845    | 189.888292    | 187.093228    | 81.307996      | 93.3254077     | 92.0015413     | 5.154E-48 | -2.124289 | down      | hypothetical protein MIMGU_mgv1a002799mg [Erythranthe guttata]                     |
| c46576.graph_c0 | 120.374546    | 128.847253    | 117.145289    | 53.5791787     | 46.4350152     | 46.8428016     | 1.291E-54 | -2.332969 | down      | PREDICTED: EIN3-binding F-box protein 1-like [Sesamum indicum]                     |
| c46577.graph_c0 | 0             | 0             | 0             | 2.383693       | 4.40112159     | 2.36339521     | 2.193E-08 | Inf       | up        | -                                                                                  |
| c46579.graph_c0 | 0             | 0             | 0             | 36.8612359     | 52.7002345     | 29.1707085     | 2.676E-24 | Inf       | up        | 60S ribosomal protein L11 [Candida albicans WO-1]                                  |
| c46581.graph_c0 | 5.91682064    | 2.01763856    | 1.5039591     | 0              | 0              | 0              | 2.443E-05 | -Inf      | down      | PREDICTED: photosystem II 22 kDa protein, chloroplastic [Phoenix dactylifera]      |
| c46582.graph_c0 | 0.66518186    | 0.52566942    | 0.53986422    | 7.12793525     | 7.44867834     | 8.06431082     | 7.901E-13 | 2.692057  | up        | PREDICTED: uncharacterized protein LOC105162786 [Sesamum indicum]                  |
| c46584.graph_c0 | 86.9018845    | 85.9442331    | 86.5525282    | 35.425948      | 26.2471425     | 21.6506696     | 2.097E-75 | -2.648107 | down      | PREDICTED: phosphoglucan phosphatase DSP4, amyloplastic [Sesamum indicum]          |
| c46585.graph_c0 | 2.69711072    | 1.52171192    | 1.63842264    | 23.8988188     | 29.1945546     | 28.6213572     | 2.608E-30 | 2.78487   | up        | PREDICTED: uncharacterized protein LOC105160704 isoform X2 [Sesamum indicum]       |
| c46587.graph_c0 | 32.6414798    | 31.2751334    | 31.748875     | 8.68084972     | 8.0522694      | 9.86771686     | 8.533E-66 | -2.864015 | down      | PREDICTED: inositol-tetrakisphosphate 1-kinase 2-like isoform X1 [Sesamum indicum] |
| c46589.graph_c0 | 0.22660799    | 0.34025236    | 0.33973362    | 5.81065544     | 3.94406156     | 5.04644708     | 1.042E-10 | 3.014663  | up        | PREDICTED: uncharacterized protein LOC105173906 [Sesamum indicum]                  |
| c46589.graph_c1 | 70.948567     | 73.5744107    | 66.2065761    | 20.6176848     | 37.1591763     | 43.9511148     | 3.271E-46 | -2.078269 | down      | PREDICTED: transcription factor G1E1-like [Sesamum indicum]                        |
| c46590.graph_c0 | 8.74249731    | 7.52795836    | 7.85203856    | 1.55886944     | 1.37619429     | 1.42560245     | 5.874E-30 | -3.482375 | down      | PREDICTED: uncharacterized protein LOC104210866 [Nicotiana glauca]                 |
| c46592.graph_c0 | 0.16761703    | 0.06711395    | 0.0430789     | 47.0053681     | 55.6529736     | 83.3479039     | 1.106E-28 | 8.373965  | up        | hypothetical protein MIMGU_mgv1a019962mg [Erythranthe guttata]                     |
| c46594.graph_c0 | 54.9240364    | 57.5870143    | 58.5448412    | 55.1730306     | 53.4666992     | 51.4880972     | 3.751E-15 | -1.112263 | down      | unnamed protein product [Coffea canephora]                                         |



| #ID             | 0 h-1<br>FPKM | 0 h-2<br>FPKM | 0 h-3<br>FPKM | 48 h-1<br>FPKM | 48 h-2<br>FPKM | 48 h-3<br>FPKM | FDR       | log2FC    | regulated | nr_annotation                                                                          |
|-----------------|---------------|---------------|---------------|----------------|----------------|----------------|-----------|-----------|-----------|----------------------------------------------------------------------------------------|
| c46598.graph_c0 | 3.84894542    | 3.57157331    | 3.57415094    | 19.5412714     | 27.995154      | 27.2676074     | 4.6E-14   | 1.743058  | up        | PREDICTED: uncharacterized protein LOC105157371 [Sesamum indicum]                      |
| c46603.graph_c0 | 14.8610357    | 10.3405763    | 11.6445239    | 8.84903213     | 10.7894919     | 10.6965042     | 1.093E-07 | -1.300164 | down      | flowering locus T [Camellia sinensis]                                                  |
| c46603.graph_c1 | 31.3894613    | 32.2936956    | 29.4768196    | 17.1777977     | 20.6198022     | 16.5492627     | 2.322E-25 | -1.796085 | down      | PREDICTED: DEAD-box ATP-dependent RNA helicase 53-like [Sesamum indicum]               |
| c46604.graph_c0 | 0.25677747    | 0.42060206    | 0.44995802    | 8.92476943     | 9.4319286      | 11.5769391     | 2.23E-34  | 3.706783  | up        | PREDICTED: carboxy-terminal kinesin 2-like [Sesamum indicum]                           |
| c46610.graph_c0 | 0             | 0             | 0             | 3.70032765     | 2.74403392     | 2.38708374     | 4.794E-11 | Inf       | up        | -                                                                                      |
| c46615.graph_c0 | 0.74333743    | 0.59526541    | 0.68229859    | 4.12843155     | 4.2906613      | 4.45689154     | 1.493E-06 | 1.653301  | up        | hypothetical protein MIMGU_mgv1a001336mg [Erythranthe guttata]                         |
| c46617.graph_c0 | 150.514395    | 151.506556    | 164.671464    | 9.48660905     | 7.3836088      | 5.74226373     | 1.71E-225 | -5.378578 | down      | BnaC09g43060D [Brassica napus]                                                         |
| c46618.graph_c0 | 12.0894006    | 5.22443884    | 4.92751455    | 0              | 0              | 0              | 6.569E-11 | -Inf      | down      | PREDICTED: mitochondrial uncoupling protein 5-like [Musa acuminata subsp. malaccensis] |
| c46620.graph_c0 | 8.96307387    | 5.17731354    | 5.13585263    | 0              | 0              | 0              | 3.929E-25 | -Inf      | down      | PREDICTED: alpha carbonic anhydrase 1, chloroplastic-like [Camelina sativa]            |
| c46621.graph_c0 | 6.54938935    | 6.19573068    | 5.17921515    | 4.60817433     | 5.51397772     | 5.75225563     | 1.786E-06 | -1.194027 | down      | PREDICTED: uncharacterized protein At1g04910-like [Sesamum indicum]                    |
| c46622.graph_c0 | 2.18972226    | 2.23036958    | 2.12275142    | 12.8471111     | 14.8097322     | 14.7378515     | 1.405E-10 | 1.676231  | up        | PREDICTED: uncharacterized protein LOC105163866 [Sesamum indicum]                      |
| c46624.graph_c0 | 1.4546899     | 1.12733926    | 1.20602201    | 0.30261569     | 0.59537146     | 1.11552902     | 0.0001185 | -1.942557 | down      | PREDICTED: folylpolyglutamate synthase-like [Solanum tuberosum]                        |
| c46629.graph_c0 | 6.26704428    | 6.63843363    | 6.73247198    | 1.34412084     | 1.87700265     | 1.68525954     | 1.114E-27 | -3.024306 | down      | Uncharacterized protein TCM_005954 [Theobroma cacao]                                   |
| c46634.graph_c0 | 21.6318072    | 20.8683716    | 19.474666     | 97.8717246     | 94.4482815     | 86.9819739     | 1.844E-16 | 1.156991  | up        | PREDICTED: L-arabinokinase-like [Sesamum indicum]                                      |
| c46636.graph_c0 | 78.3586473    | 83.2555768    | 63.7277783    | 47.1346871     | 38.6808691     | 29.9960758     | 1.461E-22 | -1.969383 | down      | PREDICTED: ABC transporter B family member 4-like [Sesamum indicum]                    |
| c46638.graph_c0 | 16.0591194    | 14.1359697    | 14.2818404    | 128.83138      | 123.89291      | 158.054492     | 7.553E-28 | 2.189389  | up        | unknown [Populus trichocarpa x Populus deltoides]                                      |
| c46642.graph_c0 | 0             | 0             | 0.04644039    | 1.1486379      | 0.93467618     | 1.45160881     | 9.894E-13 | 5.200429  | up        | PREDICTED: condensin-2 complex subunit D3 [Sesamum indicum]                            |
| c46643.graph_c0 | 0.73854566    | 0.42564906    | 0.4313911     | 0              | 0              | 0              | 7.214E-15 | -Inf      | down      | alpha-2 macroglobulin family-like protein [Micromonas sp. RCC299]                      |
| c46644.graph_c0 | 4.35236168    | 2.59328566    | 3.72863805    | 0              | 0.10113736     | 0.1698947      | 3.273E-19 | -6.344845 | down      | PREDICTED: protein ROOT HAIR DEFECTIVE 3-like [Sesamum indicum]                        |
| c46648.graph_c0 | 10.2794665    | 11.6319024    | 11.1993769    | 8.69809477     | 7.41528066     | 5.90767516     | 3.782E-11 | -1.601289 | down      | PREDICTED: ABC transporter G family member 12-like [Sesamum indicum]                   |
| c46653.graph_c0 | 0.42861882    | 0.58227945    | 0.29506723    | 2.00256319     | 2.91329021     | 3.32531831     | 9.927E-06 | 1.637434  | up        | PREDICTED: DNA mismatch repair protein MSH1, mitochondrial-like [Sesamum indicum]      |
| c46657.graph_c2 | 106.950267    | 103.157921    | 108.30996     | 36.1601316     | 33.1228316     | 36.4812046     | 2.198E-71 | -2.606832 | down      | PREDICTED: putative clathrin assembly protein At5g35200 [Sesamum indicum]              |

| #ID             | 0 h-1<br>FPKM | 0 h-2<br>FPKM | 0 h-3<br>FPKM | 48 h-1<br>FPKM | 48 h-2<br>FPKM | 48 h-3<br>FPKM | FDR       | log2FC    | regulated | nr_annotation                                                                            |
|-----------------|---------------|---------------|---------------|----------------|----------------|----------------|-----------|-----------|-----------|------------------------------------------------------------------------------------------|
| c46658.graph_c0 | 2.64291225    | 3.21246416    | 2.72912695    | 10.5001748     | 11.123662      | 13.7533491     | 8.477E-07 | 1.023283  | up        | PREDICTED: QWRF motif-containing protein 8 [Sesamum indicum]                             |
| c46659.graph_c0 | 2.77244759    | 3.11784399    | 2.90294474    | 0.66218951     | 0.70150949     | 1.06619359     | 4.13E-13  | -2.877388 | down      | PREDICTED: probable serine/threonine-protein kinase At5g41260 [Sesamum indicum]          |
| c46660.graph_c0 | 9.9894918     | 9.84014027    | 9.6148836     | 6.26975344     | 6.99162476     | 8.13981188     | 1.401E-18 | -1.48058  | down      | PREDICTED: GDP-mannose transporter GONST1-like isoform X2 [Sesamum indicum]              |
| c46665.graph_c0 | 72.1946641    | 67.4912439    | 70.6456014    | 36.779032      | 39.7924924     | 43.60438       | 1.871E-37 | -1.82715  | down      | PREDICTED: uncharacterized protein LOC105173922 isoform X1 [Sesamum indicum]             |
| c46666.graph_c0 | 0.03829138    | 0.03832973    | 0             | 0.97010433     | 0.63531034     | 0.92597067     | 9.021E-09 | 4.050135  | up        | PREDICTED: Fanconi anemia group J protein [Sesamum indicum]                              |
| c46670.graph_c1 | 48.443091     | 45.170257     | 45.6225207    | 37.7511883     | 40.3975919     | 42.3624619     | 1.706E-17 | -1.227045 | down      | PREDICTED: UDP-galactose transporter 1 [Sesamum indicum]                                 |
| c46679.graph_c0 | 0             | 0             | 0             | 27.2014587     | 45.5260544     | 21.5870788     | 3.086E-16 | Inf       | up        | RecName: Full=Tubulin beta-1 chain; AltName: Full=Beta-1-tubulin [Cyanophora paradoxa]   |
| c46684.graph_c0 | 0.18360544    | 0.22054716    | 0             | 4.80384041     | 5.30411824     | 5.59889905     | 1.086E-15 | 4.276697  | up        | hypothetical protein MIMGU_mgv1a002647mg [Erythranthe guttata]                           |
| c46687.graph_c0 | 112.375138    | 124.833601    | 107.757127    | 22.561813      | 18.5852571     | 17.6612393     | 1.7E-120  | -3.56462  | down      | PREDICTED: uncharacterized protein LOC105168969 [Sesamum indicum]                        |
| c46688.graph_c0 | 3.65860414    | 4.15716872    | 3.30372245    | 1.18424546     | 0.86854463     | 1.05373449     | 7.266E-09 | -2.851041 | down      | -                                                                                        |
| c46690.graph_c0 | 4.89292819    | 5.03238342    | 4.31841102    | 49.8322055     | 55.1001374     | 60.4501532     | 8.623E-59 | 2.518823  | up        | tyrosine aminotransferase 2 [Salvia miltiorrhiza]                                        |
| c46691.graph_c0 | 20.2031272    | 23.0500745    | 19.7270852    | 7.45545145     | 8.10161193     | 7.93882882     | 1.698E-59 | -2.440571 | down      | PREDICTED: fimbrin-1 [Sesamum indicum]                                                   |
| c46692.graph_c0 | 38.2432148    | 41.4168223    | 37.1535737    | 47.9245944     | 36.5759905     | 31.8341336     | 5.088E-10 | -1.016106 | down      | PREDICTED: E3 ubiquitin-protein ligase MBR2-like isoform X2 [Sesamum indicum]            |
| c46698.graph_c0 | 20.651992     | 23.8739517    | 19.7820739    | 2675.81929     | 2917.81528     | 3528.64679     | 1.43E-115 | 6.128759  | up        | hypothetical protein MIMGU_mgv1a006007mg [Erythranthe guttata]                           |
| c46699.graph_c0 | 0.03100056    | 0.0310316     | 0             | 5.05507298     | 12.5863194     | 13.5193329     | 2.268E-11 | 7.956731  | up        | PREDICTED: gamma-camphene synthase-like [Sesamum indicum]                                |
| c46701.graph_c0 | 18.6410966    | 18.8880168    | 16.848764     | 15.7554074     | 14.521121      | 15.8415454     | 2.219E-11 | -1.253076 | down      | PREDICTED: transcription initiation factor TFIID subunit 9-like [Sesamum indicum]        |
| c46707.graph_c0 | 32.8465576    | 33.3292358    | 34.529491     | 34.0688127     | 33.9867878     | 32.7084222     | 1.68E-11  | -1.016722 | down      | PREDICTED: F-box/kelch-repeat protein At1g30090-like [Citrus sinensis]                   |
| c46710.graph_c0 | 5.29739268    | 5.23557447    | 4.8254699     | 183.993625     | 227.562491     | 237.230504     | 1.23E-111 | 4.379926  | up        | PREDICTED: uncharacterized protein LOC105177873 [Sesamum indicum]                        |
| c46712.graph_c0 | 2.11783371    | 3.34300502    | 2.61682709    | 21.1617849     | 19.4769311     | 19.0967159     | 7.366E-09 | 1.870692  | up        | PREDICTED: sucrose transport protein SUC3 isoform X2 [Nicotiana tomentosiformis]         |
| c46713.graph_c0 | 2.71437042    | 2.71708845    | 3.1821021     | 12.2839197     | 13.1527519     | 12.5306453     | 6.425E-05 | 1.119935  | up        | PREDICTED: probable plastid-lipid-associated protein 10, chloroplastic [Sesamum indicum] |
| c46714.graph_c0 | 0.45386591    | 0.63100054    | 0.61563764    | 6.55071709     | 7.28421408     | 8.61916623     | 4.981E-17 | 2.700335  | up        | PREDICTED: boron transporter 4-like [Sesamum indicum]                                    |

| #ID             | 0 h-1<br>FPKM | 0 h-2<br>FPKM | 0 h-3<br>FPKM | 48 h-1<br>FPKM | 48 h-2<br>FPKM | 48 h-3<br>FPKM | FDR       | log2FC    | regulated | nr_annotation                                                                            |
|-----------------|---------------|---------------|---------------|----------------|----------------|----------------|-----------|-----------|-----------|------------------------------------------------------------------------------------------|
| c46718.graph_c0 | 0.18582979    | 0.14881269    | 0.04775973    | 5.99194819     | 7.76238231     | 8.07356491     | 4.742E-22 | 4.823217  | up        | PREDICTED: probable receptor-like protein kinase At1g80640 isoform X1 [Sesamum indicum]  |
| c46718.graph_c1 | 0.44147464    | 0.47137783    | 0.60513322    | 2.11491923     | 3.50437254     | 2.67800651     | 0.0011827 | 1.422319  | up        | PREDICTED: uncharacterized protein LOC105166978 [Sesamum indicum]                        |
| c46719.graph_c1 | 0.49779863    | 0.18686141    | 0.47976821    | 1.9490694      | 2.6720976      | 2.29535766     | 0.0037276 | 1.545587  | up        | PREDICTED: G2/mitotic-specific cyclin-2-like [Sesamum indicum]                           |
| c46719.graph_c2 | 4.02228851    | 4.22541978    | 4.31679999    | 21.1951863     | 20.6634709     | 21.8848165     | 3.199E-15 | 1.324969  | up        | PREDICTED: 1,4-alpha-glucan-branching enzyme-like isoform X1 [Sesamum indicum]           |
| c46722.graph_c0 | 31.590426     | 31.940224     | 27.8423708    | 32.6820852     | 27.7119521     | 25.519467      | 1.367E-15 | -1.10095  | down      | PREDICTED: E3 ubiquitin-protein ligase MBR2-like isoform X1 [Sesamum indicum]            |
| c46725.graph_c0 | 1.28400595    | 1.28529169    | 1.59677273    | 0.80132615     | 0.88933208     | 0.64510898     | 0.0001218 | -1.85442  | down      | PREDICTED: GDSL esterase/lipase At1g33811 [Sesamum indicum]                              |
| c46728.graph_c0 | 2.05177401    | 2.02966586    | 2.66762978    | 18.6354247     | 17.715947      | 16.1265828     | 1.131E-23 | 1.940233  | up        | hypothetical protein MIMGU_mgv1a007859mg [Erythranthe guttata]                           |
| c46730.graph_c0 | 17.9809927    | 14.5244439    | 16.493377     | 8.01305106     | 8.35098591     | 7.3119359      | 2.948E-36 | -2.066372 | down      | PREDICTED: protein-lysine N-methyltransferase EFM1 isoform X1 [Sesamum indicum]          |
| c46732.graph_c0 | 2.16230317    | 1.39487963    | 2.03767313    | 7.61407579     | 7.83170778     | 7.60213406     | 0.003634  | 1.023865  | up        | hypothetical protein MIMGU_mgv1a009658mg [Erythranthe guttata]                           |
| c46734.graph_c0 | 49.2876437    | 48.4121098    | 49.0515233    | 37.8258599     | 48.2441022     | 47.2905281     | 2.562E-16 | -1.15986  | down      | PREDICTED: protein RCC2 homolog isoform X1 [Sesamum indicum]                             |
| c46737.graph_c0 | 0             | 0             | 0             | 23.2659064     | 35.155991      | 20.8623432     | 6.604E-23 | Inf       | up        | 60S ribosomal protein L12 [Triticum urartu]                                              |
| c46739.graph_c0 | 0             | 0             | 0             | 2.84852112     | 3.97782814     | 2.70741039     | 1.177E-12 | Inf       | up        | predicted protein [Trichoderma reesei QM6a]                                              |
| c46740.graph_c0 | 267.531722    | 273.896711    | 257.507924    | 11702.299      | 12755.1806     | 14170.128      | 3.811E-74 | 4.576057  | up        | hypothetical protein MIMGU_mgv1a004735mg [Erythranthe guttata]                           |
| c46742.graph_c0 | 0             | 0             | 0             | 1.97722944     | 1.14252809     | 1.33282338     | 1.304E-07 | Inf       | up        | PREDICTED: homeobox-leucine zipper protein REVOLUTA-like isoform X3 [Sesamum indicum]    |
| c46745.graph_c0 | 6.56906508    | 7.54414856    | 6.34749104    | 27.069133      | 32.8512006     | 35.1479573     | 6.301E-10 | 1.195496  | up        | PREDICTED: uncharacterized protein LOC105166530 [Sesamum indicum]                        |
| c46745.graph_c1 | 0.61835478    | 0.80102513    | 0.63101412    | 9.63410393     | 8.60867823     | 9.95885504     | 2.465E-28 | 2.766229  | up        | PREDICTED: chloride channel protein CLC-b-like [Nicotiana sylvestris]                    |
| c46745.graph_c2 | 3.83353249    | 3.98785634    | 4.53986918    | 34.9707566     | 34.4796432     | 41.6533382     | 1.177E-19 | 2.147622  | up        | PREDICTED: BTB/POZ domain-containing protein At5g48800-like isoform X2 [Sesamum indicum] |
| c46746.graph_c0 | 0.87470229    | 0.78243156    | 0.90878785    | 7.78400197     | 7.81028343     | 7.85676529     | 3.997E-17 | 2.173724  | up        | PREDICTED: putative leucine--tRNA ligase, mitochondrial isoform X3 [Sesamum indicum]     |
| c46749.graph_c1 | 0.10474247    | 0             | 0.04486607    | 9.23141185     | 11.6536935     | 15.9988035     | 7.744E-23 | 6.926641  | up        | PREDICTED: BTB/POZ domain-containing protein NPY1 [Sesamum indicum]                      |
| c46751.graph_c1 | 2.20664946    | 2.04879684    | 1.19178733    | 8.13163766     | 10.2687147     | 9.96189591     | 2.286E-06 | 1.364607  | up        | transposase [Pisum sativum]                                                              |

| #ID             | 0 h-1<br>FPKM | 0 h-2<br>FPKM | 0 h-3<br>FPKM | 48 h-1<br>FPKM | 48 h-2<br>FPKM | 48 h-3<br>FPKM | FDR       | log2FC    | regulated | nr_annotation                                                                                |
|-----------------|---------------|---------------|---------------|----------------|----------------|----------------|-----------|-----------|-----------|----------------------------------------------------------------------------------------------|
| c46752.graph_c0 | 0.85295262    | 0.91948416    | 0.67450947    | 8.25085368     | 9.95744421     | 9.62739368     | 2.271E-14 | 2.489882  | up        | PREDICTED: pollen-specific protein SF21-like [Sesamum indicum]                               |
| c46753.graph_c0 | 1.32854418    | 1.14431063    | 0.43673374    | 12.9225457     | 12.4535604     | 11.7010185     | 1.794E-20 | 2.664782  | up        | PREDICTED: uncharacterized protein LOC105158178 [Sesamum indicum]                            |
| c46756.graph_c1 | 100.530254    | 95.6048031    | 97.4615591    | 35.8924276     | 32.8963774     | 35.4684688     | 2.388E-61 | -2.509856 | down      | PREDICTED: uncharacterized protein LOC105173509 [Sesamum indicum]                            |
| c46756.graph_c2 | 144.928747    | 140.16661     | 140.734433    | 100.807046     | 106.653486     | 113.263094     | 1.598E-23 | -1.427709 | down      | PREDICTED: trihelix transcription factor ASIL2 [Sesamum indicum]                             |
| c46759.graph_c0 | 12.3478613    | 10.4228863    | 10.2964594    | 55.1309184     | 54.2111841     | 44.5494464     | 8.412E-11 | 1.204193  | up        | farnesyl diphosphate synthase [Bacopa monnieri]                                              |
| c46761.graph_c1 | 41.007158     | 37.9467994    | 39.0534589    | 20.3164209     | 20.3666018     | 17.7412786     | 3.076E-40 | -2.030414 | down      | PREDICTED: uncharacterized protein LOC105178437 [Sesamum indicum]                            |
| c46762.graph_c0 | 1.07059126    | 0.98477167    | 0.96674476    | 0.29322388     | 0.05647912     | 0.09487594     | 2.558E-12 | -3.752961 | down      | PREDICTED: phosphonase D beta 1-like [Sesamum indicum]                                       |
| c46762.graph_c2 | 4.18122222    | 3.10530351    | 3.23537657    | 0.20709756     | 0.0877579      | 0.25798383     | 5.65E-26  | -5.26066  | down      | hypothetical protein JCGZ_20700 [Jatropha curcas]                                            |
| c46766.graph_c0 | 0             | 0             | 0.04472649    | 1.21847499     | 1.52861034     | 1.6833503      | 3.771E-11 | 5.575435  | up        | PREDICTED: protein ESKIMO 1-like [Sesamum indicum]                                           |
| c46767.graph_c0 | 15.7976799    | 15.0567473    | 14.8737392    | 10.1348614     | 10.2532528     | 9.14615587     | 2.086E-24 | -1.646994 | down      | PREDICTED: MYST-like histone acetyltransferase 2 isoform X2 [Sesamum indicum]                |
| c46769.graph_c0 | 1.39768571    | 1.25917675    | 1.05199057    | 1.2324547      | 0.87691991     | 1.03116028     | 0.0010679 | -1.249316 | down      | PREDICTED: endoglucanase 11-like [Sesamum indicum]                                           |
| c46770.graph_c0 | 29.2311509    | 27.517102     | 27.1630984    | 6.29197262     | 5.93236802     | 6.13042254     | 1.557E-84 | -3.208666 | down      | PREDICTED: diphthamide biosynthesis protein 2 [Sesamum indicum]                              |
| c46771.graph_c0 | 5.29875796    | 5.3757404     | 4.69276759    | 0.46176933     | 0.83860904     | 0.52827373     | 1.127E-31 | -4.095137 | down      | PREDICTED: LOW QUALITY PROTEIN: uncharacterized protein LOC105163603 [Sesamum indicum]       |
| c46775.graph_c0 | 12.6482602    | 13.7921422    | 11.7851948    | 80.2854521     | 84.2042954     | 82.8390108     | 7.155E-29 | 1.676701  | up        | PREDICTED: gamma-tubulin complex component 3 [Sesamum indicum]                               |
| c46778.graph_c0 | 0.22975133    | 0.17248604    | 0.07380989    | 1.53454882     | 1.56961087     | 1.36543232     | 0.0001775 | 2.223533  | up        | PREDICTED: probable ubiquitin-like-specific protease 2B isoform X1 [Sesamum indicum]         |
| c46782.graph_c0 | 0             | 0             | 0             | 0.79332118     | 0.80040723     | 0.73950634     | 1.659E-09 | Inf       | up        | UTP-glucose-1-phosphate uridylyltransferase [Mucor circinelloides f. circinelloides 1006PhL] |
| c46784.graph_c0 | 20.8217559    | 17.1096017    | 18.769682     | 17.4645364     | 9.70573568     | 8.15204694     | 2.493E-05 | -1.686039 | down      | -                                                                                            |
| c46784.graph_c1 | 7.93945177    | 9.04582334    | 8.46061793    | 60.6555093     | 79.4394855     | 83.9723824     | 4.233E-23 | 2.115488  | up        | PREDICTED: soluble inorganic pyrophosphatase [Sesamum indicum]                               |
| c46792.graph_c1 | 24.4781464    | 26.6396106    | 22.8953966    | 18.6765525     | 19.8952013     | 18.9866856     | 7.628E-23 | -1.379991 | down      | PREDICTED: LOW QUALITY PROTEIN: protein ALWAYS EARLY 3-like [Sesamum indicum]                |
| c46797.graph_c0 | 0             | 0             | 0             | 0.68318037     | 1.09809853     | 0.79654523     | 1.315E-11 | Inf       | up        | hypothetical protein GUITHDRAFT_89280 [Guillardia theta CCMP2712]                            |
| c46802.graph_c0 | 0.11272624    | 0.1253768     | 0.0482859     | 2.71165893     | 2.40815636     | 2.35121395     | 3.337E-17 | 3.698302  | up        | PREDICTED: callose synthase 7 [Sesamum indicum]                                              |
| c46804.graph_c0 | 1.04418354    | 1.47773774    | 0.97166073    | 0.82928447     | 0.59739791     | 0.61982956     | 0.0001448 | -1.780499 | down      | hypothetical protein MIMGU_mgv1a013877mg [Erythranthe guttata]                               |

| #ID             | 0 h-1<br>FPKM | 0 h-2<br>FPKM | 0 h-3<br>FPKM | 48 h-1<br>FPKM | 48 h-2<br>FPKM | 48 h-3<br>FPKM | FDR       | log2FC    | regulated | nr_annotation                                                                                                           |
|-----------------|---------------|---------------|---------------|----------------|----------------|----------------|-----------|-----------|-----------|-------------------------------------------------------------------------------------------------------------------------|
| c46804.graph_c1 | 6.44340444    | 6.29443831    | 5.48676674    | 4.8394584      | 5.3288615      | 5.93947722     | 1.608E-08 | -1.196569 | down      | PREDICTED: probable serine/threonine-protein kinase abkC isoform X1 [Sesamum indicum]                                   |
| c46807.graph_c1 | 63.8047329    | 61.1200834    | 62.5552312    | 21.9517971     | 30.70422       | 32.0837838     | 1.829E-49 | -2.169393 | down      | hypothetical protein MIMGU_mgv1a012384mg [Erythranthe guttata]                                                          |
| c46809.graph_c1 | 515.97447     | 510.28739     | 517.220676    | 378.818383     | 370.806109     | 361.399211     | 6.689E-20 | -1.491166 | down      | PREDICTED: pentatricopeptide repeat-containing protein At5g14080-like [Sesamum indicum]                                 |
| c46810.graph_c0 | 18.9105109    | 20.2215166    | 17.5210217    | 96.8289772     | 70.3874585     | 61.9346164     | 0.0045476 | 1.00729   | up        | PREDICTED: putative 1-phosphatidylinositol-3-phosphate 5-kinase FAB1C isoform X1 [Sesamum indicum]                      |
| c46818.graph_c0 | 11.6693665    | 12.8491568    | 10.6079971    | 7.644858       | 8.26752506     | 8.60922254     | 6.083E-14 | -1.536342 | down      | PREDICTED: geranylgeranyl transferase type-1 subunit beta [Sesamum indicum]                                             |
| c46821.graph_c0 | 7.15802122    | 7.05567727    | 6.90879735    | 27.803179      | 37.6298585     | 38.562763      | 8.694E-12 | 1.276869  | up        | PREDICTED: nodal modulator 1 [Sesamum indicum]                                                                          |
| c46822.graph_c0 | 5.57503254    | 5.70744725    | 7.13157328    | 4.78589609     | 4.82275578     | 5.11015387     | 2.589E-09 | -1.343847 | down      | PREDICTED: uncharacterized protein LOC105160395 [Sesamum indicum]                                                       |
| c46832.graph_c0 | 1.56198078    | 1.53911448    | 1.16041663    | 8.38666358     | 10.3376393     | 11.4036719     | 1.245E-12 | 1.802683  | up        | PREDICTED: cytochrome c-type biogenesis ccda-like chloroplastic protein [Sesamum indicum]                               |
| c46833.graph_c0 | 61.0235244    | 57.9088477    | 62.939766     | 24.921492      | 24.4146936     | 23.1991631     | 6.737E-57 | -2.34333  | down      | PREDICTED: F-box protein SKP1-like [Sesamum indicum]                                                                    |
| c46836.graph_c0 | 2.22752375    | 2.90837515    | 2.57206211    | 39.317816      | 51.6717338     | 54.9382406     | 9.13E-37  | 3.219451  | up        | PREDICTED: probable pectate lyase 12 [Sesamum indicum]                                                                  |
| c46837.graph_c0 | 4.60673214    | 4.98025269    | 4.69943681    | 2.53335474     | 3.76282861     | 3.79954417     | 1.106E-15 | -1.525413 | down      | PREDICTED: protein ROOT PRIMORDIUM DEFECTIVE 1-like [Sesamum indicum]                                                   |
| c46838.graph_c0 | 69.644263     | 73.0703166    | 71.0439443    | 25.2540453     | 27.6278994     | 26.4783126     | 1.295E-64 | -2.44834  | down      | PREDICTED: regulator of nonsense transcripts UPF3-like [Sesamum indicum]                                                |
| c46841.graph_c0 | 241.047589    | 221.643557    | 249.413677    | 68.1070027     | 77.6740788     | 79.6501134     | 4.732E-75 | -2.680196 | down      | PREDICTED: uncharacterized protein LOC104591752 [Nelumbo nucifera]                                                      |
| c46842.graph_c0 | 12.5275414    | 13.1638074    | 11.1255866    | 7.88547155     | 8.22567488     | 8.81760159     | 3.131E-18 | -1.57987  | down      | PREDICTED: uncharacterized protein LOC105174093 isoform X2 [Sesamum indicum]                                            |
| c46843.graph_c1 | 4.82520577    | 5.5687491     | 4.44982832    | 2.09190319     | 2.4931325      | 2.72224321     | 2.364E-14 | -2.042385 | down      | hypothetical protein F383_09329 [Gossypium arboreum]                                                                    |
| c46844.graph_c1 | 22.3812256    | 23.4670243    | 23.1140959    | 10.7210136     | 13.6904018     | 13.1613343     | 2.221E-36 | -1.89798  | down      | PREDICTED: uncharacterized protein LOC105173956 [Sesamum indicum]                                                       |
| c46848.graph_c0 | 28.8429776    | 30.2958117    | 27.6301838    | 22.0680427     | 24.1443975     | 22.7858156     | 6.545E-22 | -1.348673 | down      | PREDICTED: serine/threonine-protein phosphatase 4 regulatory subunit 3A-like isoform X1 [Beta vulgaris subsp. vulgaris] |
| c46849.graph_c0 | 3.4500809     | 3.13766347    | 3.67655314    | 13.0044692     | 15.7066222     | 14.38221       | 7.135E-09 | 1.0484    | up        | PREDICTED: patellin-3 [Sesamum indicum]                                                                                 |
| c46852.graph_c0 | 476.026893    | 447.305302    | 455.919056    | 452.214102     | 476.913781     | 464.619756     | 1.579E-10 | -1.002921 | down      | PREDICTED: uncharacterized protein LOC105178178 [Sesamum indicum]                                                       |
| c46855.graph_c0 | 2.49235888    | 3.11856826    | 2.0017374     | 15.4988341     | 13.5305838     | 9.44923087     | 0.0052494 | 1.328683  | up        | -                                                                                                                       |
| c46855.graph_c1 | 0.50419743    | 0.6234558     | 0.26678798    | 9.53590276     | 6.57072814     | 5.61613881     | 5.784E-07 | 2.959572  | up        | PREDICTED: peptide-N4-(N-acetyl-beta-glucosaminyl)asparagine amidase A-like [Sesamum indicum]                           |
| c46858.graph_c0 | 0             | 0             | 0             | 3.03674433     | 2.80956782     | 2.39584147     | 4.417E-22 | Inf       | up        | predicted protein [Hordeum vulgare subsp. vulgare]                                                                      |

| #ID             | 0 h-1<br>FPKM | 0 h-2<br>FPKM | 0 h-3<br>FPKM | 48 h-1<br>FPKM | 48 h-2<br>FPKM | 48 h-3<br>FPKM | FDR       | log2FC    | regulated | nr_annotation                                                                                                             |
|-----------------|---------------|---------------|---------------|----------------|----------------|----------------|-----------|-----------|-----------|---------------------------------------------------------------------------------------------------------------------------|
| c46859.graph_c0 | 33.7597557    | 31.6079078    | 33.3463443    | 147.152767     | 149.989295     | 152.276368     | 1.67E-15  | 1.168716  | up        | PREDICTED: NADH dehydrogenase [ubiquinone] 1 alpha subcomplex subunit 8-B-like [Sesamum indicum]                          |
| c46861.graph_c0 | 6.85524604    | 5.64972351    | 5.35403944    | 1.24971021     | 1.46576462     | 2.52182228     | 4.563E-30 | -2.792313 | down      | PREDICTED: pentatricopeptide repeat-containing protein At3g54980, mitochondrial-like [Sesamum indicum]                    |
| c46863.graph_c0 | 2.52902963    | 3.68674088    | 2.90282616    | 14.0699242     | 15.7680693     | 15.800124      | 2.679E-11 | 1.303892  | up        | PREDICTED: myosin-2 heavy chain [Sesamum indicum]                                                                         |
| c46867.graph_c0 | 6.22695421    | 6.55615275    | 6.34346141    | 4.96385986     | 6.61262037     | 5.84500358     | 6.516E-07 | -1.156614 | down      | PREDICTED: U11/U12 small nuclear ribonucleoprotein 59 kDa protein isoform X1 [Sesamum indicum]                            |
| c46867.graph_c1 | 5.9863192     | 7.61734779    | 6.519201      | 42.9982092     | 56.0480133     | 59.7181641     | 6.169E-18 | 1.957308  | up        | -                                                                                                                         |
| c46868.graph_c0 | 18.2499191    | 18.7244759    | 19.8288694    | 7.49664534     | 8.13950755     | 10.9190888     | 3.647E-45 | -2.119056 | down      | PREDICTED: putative glycerol-3-phosphate transporter 4 isoform X1 [Sesamum indicum]                                       |
| c46875.graph_c0 | 39.2994449    | 39.2313143    | 34.1229017    | 34.444412      | 29.2273727     | 21.0278865     | 1.19E-19  | -1.421551 | down      | PREDICTED: uncharacterized protein LOC105163168 [Sesamum indicum]                                                         |
| c46878.graph_c0 | 3.52640345    | 2.99599492    | 2.43714584    | 10.8928773     | 12.4073279     | 14.8665639     | 2.742E-06 | 1.072893  | up        | PREDICTED: LOW QUALITY PROTEIN: ATP-dependent Clp protease ATP-binding subunit clpX-like, mitochondrial [Sesamum indicum] |
| c46883.graph_c0 | 26.405815     | 23.1759245    | 22.8285177    | 122.265963     | 158.149662     | 183.103918     | 1.779E-11 | 1.65628   | up        | PREDICTED: serine hydroxymethyltransferase 4 [Sesamum indicum]                                                            |
| c46886.graph_c0 | 0             | 0             | 0             | 9.36138381     | 3.93876636     | 11.9333334     | 3.594E-08 | Inf       | up        | -                                                                                                                         |
| c46888.graph_c1 | 6.11006754    | 4.64954945    | 4.80715023    | 45.3478549     | 49.6226364     | 53.6384875     | 3.796E-44 | 2.236914  | up        | PREDICTED: probable sphingolipid transporter spinster homolog 2 [Sesamum indicum]                                         |
| c46890.graph_c0 | 6.58533004    | 7.02472736    | 6.58187431    | 27.1475571     | 32.2652231     | 29.390384      | 5.293E-11 | 1.117074  | up        | PREDICTED: cleavage and polyadenylation specificity factor subunit 2 [Sesamum indicum]                                    |
| c46891.graph_c0 | 125.717258    | 134.820094    | 117.264677    | 83.133956      | 85.2606654     | 77.7411566     | 3.992E-28 | -1.634367 | down      | PREDICTED: primary amine oxidase-like [Sesamum indicum]                                                                   |
| c46895.graph_c0 | 0             | 0             | 0             | 1.67162478     | 1.70763791     | 1.16867274     | 1.517E-11 | Inf       | up        | trypsin-like protease [Conidiobolus coronatus]                                                                            |
| c46898.graph_c0 | 0             | 0             | 0             | 1.29514608     | 2.2359337      | 0.93900334     | 5.573E-06 | Inf       | up        | hypothetical protein HMPREF1544_02206 [Mucor circinelloides f. circinelloides 1006PhL]                                    |
| c46899.graph_c0 | 19.4485729    | 20.029369     | 16.8368412    | 10.0943656     | 9.83373856     | 10.4922669     | 1.099E-41 | -1.904253 | down      | PREDICTED: nuclear-pore anchor [Sesamum indicum]                                                                          |
| c46900.graph_c2 | 87.7322834    | 89.5017231    | 85.6229526    | 29.3735727     | 35.9359691     | 36.478585      | 9.204E-58 | -2.389663 | down      | PREDICTED: 1,4-alpha-glucan-branching enzyme 3, chloroplastic/amyloplastic [Sesamum indicum]                              |
| c46903.graph_c1 | 3.51174154    | 2.65787802    | 3.90736111    | 26.1186882     | 28.9234917     | 33.0699654     | 1.467E-25 | 2.105639  | up        | hypothetical protein MIMGU_mgv1a010174mg [Erythranthe guttata]                                                            |
| c46907.graph_c0 | 6.59517583    | 5.79668479    | 4.7543031     | 4.89036348     | 3.29683908     | 3.56024947     | 0.0006188 | -1.552614 | down      | -                                                                                                                         |
| c46907.graph_c1 | 12.9990798    | 11.7261951    | 12.6559882    | 13.0181819     | 11.9404201     | 10.3048019     | 1.521E-10 | -1.098797 | down      | PREDICTED: endoplasmin-A2 isoform X1 [Sesamum indicum]                                                                    |
| c46910.graph_c0 | 1.78511556    | 1.1562314     | 1.07950314    | 21.0891262     | 24.8265934     | 23.865092      | 1.249E-51 | 3.100984  | up        | PREDICTED: cytosolic endo-beta-N-acetylglucosaminidase [Sesamum indicum]                                                  |

| #ID             | 0 h-1<br>FPKM | 0 h-2<br>FPKM | 0 h-3<br>FPKM | 48 h-1<br>FPKM | 48 h-2<br>FPKM | 48 h-3<br>FPKM | FDR       | log2FC    | regulated | nr_annotation                                                                                     |
|-----------------|---------------|---------------|---------------|----------------|----------------|----------------|-----------|-----------|-----------|---------------------------------------------------------------------------------------------------|
| c46912.graph_c0 | 48.2427553    | 44.1536762    | 49.1718293    | 26.4762328     | 28.8677485     | 25.7024712     | 9.742E-37 | -1.823451 | down      | PREDICTED: uncharacterized protein LOC105158577 [Sesamum indicum]                                 |
| c46913.graph_c2 | 220.391984    | 217.392697    | 199.780805    | 99.9972111     | 96.3437485     | 79.4212123     | 7.532E-49 | -2.223359 | down      | PREDICTED: serine/threonine-protein kinase HT1-like [Sesamum indicum]                             |
| c46915.graph_c1 | 158.037291    | 149.981082    | 155.610949    | 70.597821      | 93.6037837     | 89.8231779     | 6.532E-37 | -1.890381 | down      | PREDICTED: uncharacterized protein At1g04910-like [Sesamum indicum]                               |
| c46916.graph_c0 | 5.17659731    | 3.10478607    | 3.10616104    | 14.0508703     | 18.663903      | 22.5674094     | 0.0001239 | 1.259277  | up        | plastidic aldolase [Solanum tuberosum]                                                            |
| c46917.graph_c0 | 0             | 0             | 0             | 1.66358627     | 0.95586057     | 3.06085398     | 9.389E-06 | Inf       | up        | hypoteucal protein CICLE_V10005479mg [Citrus clamentina]                                          |
| c46919.graph_c0 | 50.1402062    | 46.5304008    | 50.9920916    | 31.9351836     | 33.8867801     | 32.8302802     | 2.668E-29 | -1.600672 | down      | PREDICTED: protein REVEILLE 7-like isoform X2 [Sesamum indicum]                                   |
| c46925.graph_c0 | 148.998171    | 142.405006    | 153.303666    | 1000.49512     | 993.187301     | 901.251725     | 2.207E-25 | 1.685586  | up        | PREDICTED: aquaporin PIP2-7 [Sesamum indicum]                                                     |
| c46929.graph_c1 | 0.12891214    | 0.30109621    | 0.27609535    | 2.3356581      | 2.18078        | 1.90213126     | 7.295E-05 | 2.165309  | up        | -                                                                                                 |
| c46933.graph_c1 | 0.16645887    | 0.45822027    | 0.40107419    | 7.22674912     | 7.06695176     | 7.64133269     | 3.437E-26 | 3.396699  | up        | PREDICTED: probable LRR receptor-like serine/threonine-protein kinase At1g07650 [Sesamum indicum] |
| c46938.graph_c0 | 22.2719481    | 21.0287552    | 23.0898356    | 19.7253908     | 21.5267097     | 19.734451      | 2.593E-14 | -1.141558 | down      | PREDICTED: EH domain-containing protein 1-like [Sesamum indicum]                                  |
| c46941.graph_c0 | 19.2166944    | 19.9168552    | 18.0508142    | 562.569439     | 552.356528     | 586.945453     | 9.15E-132 | 3.878631  | up        | Expansin A1, ALPHA 1.2,EXPA1 [Theobroma cacao]                                                    |
| c46943.graph_c0 | 4.83680553    | 4.69924742    | 4.57021074    | 1.11399518     | 1.59666381     | 2.09906728     | 1.089E-09 | -2.577514 | down      | PREDICTED: molybdenum cofactor sulfurase-like [Sesamum indicum]                                   |
| c46943.graph_c1 | 2.24991479    | 1.77902325    | 2.13805213    | 14.9274151     | 19.0614249     | 21.1246299     | 1.464E-20 | 2.136811  | up        | PREDICTED: SPX domain-containing membrane protein At4g22990-like [Sesamum indicum]                |
| c46945.graph_c0 | 1.96555781    | 2.17739546    | 1.48181417    | 23.5162567     | 23.019877      | 22.5358628     | 3.879E-40 | 2.604666  | up        | PREDICTED: mitogen-activated protein kinase 9-like [Sesamum indicum]                              |
| c46945.graph_c1 | 2.59052261    | 2.24736774    | 2.21928274    | 22.9109606     | 22.2487692     | 24.0668468     | 1.383E-07 | 2.277855  | up        | PREDICTED: mitogen-activated protein kinase 9-like [Sesamum indicum]                              |
| c46948.graph_c0 | 0             | 0             | 0             | 9.7171814      | 7.63188868     | 6.11203229     | 2.019E-12 | Inf       | up        | Long-chain-alcohol oxidase FAO4A [Glycine soja]                                                   |
| c46948.graph_c1 | 0.06146046    | 0.15380501    | 0.11846869    | 20.2987664     | 15.4157572     | 13.6281599     | 7.841E-25 | 6.194791  | up        | PREDICTED: long-chain-alcohol oxidase FAO4A-like isoform X1 [Sesamum indicum]                     |
| c46954.graph_c0 | 5.29112283    | 4.8345239     | 5.49478501    | 2.40892346     | 2.85219316     | 2.54691772     | 1.507E-13 | -2.020981 | down      | hypothetical protein MIMGU_mgv1a007683mg [Erythranthe guttata]                                    |
| c46956.graph_c0 | 0.73203614    | 0.51724882    | 0.40117893    | 6.40679472     | 6.71367639     | 6.19490812     | 2.039E-28 | 2.536161  | up        | PREDICTED: uncharacterized protein LOC105155208 [Sesamum indicum]                                 |
| c46957.graph_c0 | 4.26585206    | 2.92474224    | 3.90483585    | 0.10767072     | 0.28516017     | 0.14370713     | 2.642E-23 | -5.401074 | down      | BRI1 kinase inhibitor 1 [Glycine soja]                                                            |
| c46957.graph_c2 | 16.1265408    | 15.694281     | 10.2177103    | 2.88882635     | 4.59054184     | 4.03929478     | 2.355E-14 | -2.888161 | down      | PREDICTED: CBL-interacting serine/threonine-protein kinase 6-like [Sesamum indicum]               |
| c46957.graph_c3 | 19.2861535    | 18.8324374    | 17.1928213    | 17.8220811     | 22.6275758     | 15.3737675     | 3.31E-11  | -1.004961 | down      | PREDICTED: RNA-binding protein 42, partial [Sesamum indicum]                                      |

| #ID             | 0 h-1<br>FPKM | 0 h-2<br>FPKM | 0 h-3<br>FPKM | 48 h-1<br>FPKM | 48 h-2<br>FPKM | 48 h-3<br>FPKM | FDR       | log2FC    | regulated | nr_annotation                                                                                                 |
|-----------------|---------------|---------------|---------------|----------------|----------------|----------------|-----------|-----------|-----------|---------------------------------------------------------------------------------------------------------------|
| c46957.graph_c6 | 3.64265611    | 3.87940072    | 3.82598795    | 57.172079      | 58.5377079     | 63.3062934     | 1.942E-88 | 2.960808  | up        | PREDICTED: alpha-glucan phosphorylase, H isozyme [Sesamum indicum]                                            |
| c46959.graph_c0 | 54.6267508    | 55.5915447    | 55.4959728    | 277.663991     | 291.267493     | 277.372223     | 1.023E-21 | 1.334406  | up        | PREDICTED: 60S ribosomal protein L27a-3-like [Sesamum indicum]                                                |
| c46964.graph_c0 | 5.20673258    | 4.92830299    | 4.18747544    | 28.7154276     | 27.6550124     | 25.3766047     | 7.544E-16 | 1.498981  | up        | hypothetical protein MIMGU_mgv1a000577mg [Erythranthe guttata]                                                |
| c46965.graph_c0 | 0.38176897    | 0.70970946    | 0.49058824    | 3.81857084     | 3.72594598     | 4.11305534     | 0.0001981 | 1.863819  | up        | -                                                                                                             |
| c46968.graph_c1 | 30.9294866    | 29.1015025    | 31.2794296    | 5.80476357     | 8.43660444     | 8.60840619     | 2.038E-88 | -3.023268 | down      | PREDICTED: lys-63-specific deubiquitinase BRCC36 [Sesamum indicum]                                            |
| c46969.graph_c0 | 23.9850753    | 23.5650673    | 23.4522329    | 15.9083958     | 14.9048695     | 16.336913      | 2.171E-25 | -1.607309 | down      | PREDICTED: serine/threonine-protein kinase HT1-like [Sesamum indicum]                                         |
| c46970.graph_c2 | 38.3747714    | 43.0643976    | 38.3924617    | 31.6546656     | 32.9773642     | 29.1350727     | 1.131E-22 | -1.370685 | down      | PREDICTED: preprotein translocase subunit SCY2, chloroplastic [Sesamum indicum]                               |
| c46971.graph_c1 | 45.4522506    | 51.2434819    | 48.1615199    | 28.7611661     | 35.5386798     | 34.1716953     | 9.003E-29 | -1.578103 | down      | PREDICTED: uncharacterized protein LOC105159071 [Sesamum indicum]                                             |
| c46972.graph_c0 | 127.101446    | 120.24303     | 134.709411    | 94.3182375     | 96.0784944     | 104.067947     | 1.697E-22 | -1.394937 | down      | unnamed protein product [Coffea canephora]                                                                    |
| c46974.graph_c0 | 1.37497985    | 1.26810391    | 1.44925796    | 0.93936622     | 1.17607999     | 1.43106353     | 0.00042   | -1.23041  | down      | PREDICTED: LOW QUALITY PROTEIN: U3 small nucleolar RNA-associated protein 21 homolog [Sesamum indicum]        |
| c46976.graph_c0 | 23.5194074    | 26.5507881    | 22.4805265    | 21.1893304     | 20.7739419     | 23.0195881     | 4.815E-17 | -1.17582  | down      | PREDICTED: serine/threonine-protein kinase EDR1 [Sesamum indicum]                                             |
| c46979.graph_c0 | 3.98613871    | 4.69427085    | 4.59504573    | 21.9077359     | 24.4481611     | 25.9324311     | 3.077E-19 | 1.424179  | up        | PREDICTED: probable boron transporter 2 [Sesamum indicum]                                                     |
| c46981.graph_c0 | 5.13779598    | 4.68579042    | 3.81464561    | 77.2750606     | 88.5864713     | 89.9418618     | 5.433E-88 | 3.211992  | up        | PREDICTED: heterodimeric geranylgeranyl pyrophosphate synthase small subunit, chloroplastic [Sesamum indicum] |
| c46981.graph_c1 | 0.68697652    | 0.9578183     | 0.4729243     | 6.55490707     | 7.7582685      | 7.58227196     | 9.763E-14 | 2.354431  | up        | PREDICTED: putative membrane-bound O-acyltransferase C24H6.01c [Sesamum indicum]                              |
| c46982.graph_c0 | 0.22131996    | 0.16615619    | 0.28440492    | 3.36425738     | 3.67202345     | 4.03668398     | 8.043E-08 | 3.018861  | up        | PREDICTED: LOW QUALITY PROTEIN: ABC transporter B family member 13-like [Sesamum indicum]                     |
| c46982.graph_c1 | 0.16741026    | 0.12568342    | 0.18823771    | 1.60012847     | 1.87895268     | 2.84756939     | 3.955E-07 | 2.690356  | up        | PREDICTED: LOW QUALITY PROTEIN: ABC transporter B family member 13-like [Sesamum indicum]                     |
| c46984.graph_c0 | 34.1939153    | 35.3015827    | 33.1504036    | 13.2344273     | 14.9286266     | 13.9154813     | 1.317E-57 | -2.305258 | down      | PREDICTED: uncharacterized protein LOC105171157 [Sesamum indicum]                                             |
| c46985.graph_c0 | 3.9280582     | 3.84194595    | 3.9688104     | 3.25966751     | 2.95572432     | 3.19539179     | 3.727E-06 | -1.335226 | down      | PREDICTED: sucrose nonfermenting 4-like protein [Sesamum indicum]                                             |
| c46988.graph_c0 | 41.5278838    | 37.9989241    | 45.6027967    | 22.6910675     | 21.2686784     | 20.6385762     | 2.803E-31 | -1.971156 | down      | PREDICTED: aspartic proteinase-like [Sesamum indicum]                                                         |
| c46991.graph_c0 | 0             | 0             | 0             | 3.47036779     | 7.47964133     | 1.59719607     | 0.0002557 | Inf       | up        | NADH dehydrogenase subunit 10 (mitochondrion) [Nephroselmis olivacea]                                         |



| #ID             | 0 h-1<br>FPKM | 0 h-2<br>FPKM | 0 h-3<br>FPKM | 48 h-1<br>FPKM | 48 h-2<br>FPKM | 48 h-3<br>FPKM | FDR       | log2FC    | regulated | nr_annotation                                                                                        |
|-----------------|---------------|---------------|---------------|----------------|----------------|----------------|-----------|-----------|-----------|------------------------------------------------------------------------------------------------------|
| c46992.graph_c0 | 6.99707137    | 7.04527834    | 6.82297219    | 4.39855523     | 3.73582276     | 3.913808       | 1.197E-11 | -1.806549 | down      | PREDICTED: pentatricopeptide repeat-containing protein At4g16835, mitochondrial [Sesamum indicum]    |
| c46994.graph_c0 | 29.029699     | 28.0913366    | 26.4028057    | 21.0061175     | 22.7425208     | 20.9211404     | 3.014E-20 | -1.386517 | down      | RNA-binding (RRM/RBD/RNP motif) family protein [Medicago truncatula]                                 |
| c47000.graph_c0 | 5.5406586     | 4.91452031    | 5.6116358     | 21.5455194     | 25.8673594     | 27.4064619     | 8.739E-17 | 1.197468  | up        | PREDICTED: peroxidase 7-like [Sesamum indicum]                                                       |
| c47001.graph_c0 | 2.41325432    | 3.07210312    | 3.10112734    | 1.5466068      | 1.40803642     | 1.78470936     | 1.903E-08 | -1.876673 | down      | PREDICTED: ATP-dependent zinc metalloprotease FTSH 10, mitochondrial-like [Sesamum indicum]          |
| c47003.graph_c0 | 0.19581067    | 0.50090613    | 0.25162447    | 1.52332342     | 1.46513915     | 1.7299746      | 0.0073848 | 1.298646  | up        | PREDICTED: transcription factor HBP-1b(c38)-like [Sesamum indicum]                                   |
| c47004.graph_c1 | 42.0591468    | 41.5198265    | 42.2067169    | 456.628528     | 516.519445     | 456.668738     | 1.324E-59 | 2.487824  | up        | PREDICTED: glucan endo-1,3-beta-glucosidase 5 [Sesamum indicum]                                      |
| c47005.graph_c0 | 0.36377804    | 0.23172692    | 0.29748039    | 5.78871369     | 6.55202825     | 6.47911721     | 2.314E-15 | 3.378502  | up        | PREDICTED: (6-4)DNA photolyase [Sesamum indicum]                                                     |
| c47005.graph_c1 | 4.93305483    | 4.47793294    | 4.21298927    | 55.7778391     | 62.1998496     | 60.2300731     | 4.953E-64 | 2.69143   | up        | PREDICTED: 3-oxoacyl-[acyl-carrier-protein] reductase 4-like [Sesamum indicum]                       |
| c47006.graph_c0 | 0.18585978    | 0.08586733    | 0.16534881    | 1.75177523     | 2.10695345     | 2.01578706     | 9.511E-10 | 2.726814  | up        | PREDICTED: putative ATP-dependent helicase hrq1 isoform X1 [Sesamum indicum]                         |
| c47007.graph_c1 | 38.7305071    | 40.2961273    | 37.347542     | 31.3704772     | 32.4486553     | 30.261896      | 3.223E-21 | -1.323788 | down      | PREDICTED: uncharacterized protein LOC105162827 [Sesamum indicum]                                    |
| c47008.graph_c0 | 2.69800569    | 2.99006883    | 2.16690258    | 0.31069735     | 0.18808353     | 0.03949381     | 5.945E-20 | -4.862399 | down      | PREDICTED: pyruvate decarboxylase 1-like [Sesamum indicum]                                           |
| c47010.graph_c0 | 39.3244757    | 37.4175294    | 37.7316861    | 34.4168584     | 34.9466317     | 36.0681649     | 6.943E-16 | -1.1364   | down      | PREDICTED: probable transcriptional regulator SLK2 [Sesamum indicum]                                 |
| c47011.graph_c0 | 0             | 0             | 0             | 3.02914896     | 3.03269645     | 3.49502842     | 1.232E-17 | Inf       | up        | PREDICTED: condensin complex subunit 1 [Sesamum indicum]                                             |
| c47018.graph_c0 | 66.0199894    | 64.3955238    | 65.0755799    | 24.2344706     | 24.5246696     | 22.4866456     | 3.445E-66 | -2.47315  | down      | PREDICTED: 65-kDa microtubule-associated protein 6-like [Sesamum indicum]                            |
| c47019.graph_c1 | 2.66330801    | 2.78854847    | 3.61914913    | 2.03057632     | 1.88225572     | 2.03264393     | 2.404E-06 | -1.629312 | down      | PREDICTED: G-type lectin 5-receptor-like serine/threonine-protein kinase At5g35370 [Sesamum indicum] |
| c47021.graph_c0 | 7.36544331    | 8.18995728    | 6.79469165    | 58.6939521     | 58.3042467     | 59.0388732     | 2.329E-42 | 1.961412  | up        | PREDICTED: uncharacterized protein LOC105163284 [Sesamum indicum]                                    |
| c47022.graph_c0 | 1.89150628    | 1.24792295    | 1.10484566    | 8.237646       | 7.55202728     | 10.9594724     | 1.869E-06 | 1.641334  | up        | PREDICTED: dihydroorotase, mitochondrial isoform X3 [Vitis vinifera]                                 |
| c47023.graph_c0 | 113.86264     | 113.315573    | 111.71551     | 64.6034814     | 65.1582064     | 56.7209479     | 9.737E-39 | -1.878136 | down      | unnamed protein product [Coffea canephora]                                                           |
| c47025.graph_c0 | 83.9107555    | 74.0656841    | 75.6178503    | 4.8160677      | 7.98011346     | 3.62602991     | 5.58E-128 | -4.852076 | down      | -                                                                                                    |
| c47026.graph_c0 | 14.5558059    | 16.1095062    | 15.7629542    | 13.7560192     | 12.3385554     | 12.632152      | 5.13E-14  | -1.277598 | down      | PREDICTED: uncharacterized protein LOC105170563 isoform X2 [Sesamum indicum]                         |
| c47027.graph_c0 | 0             | 0             | 0             | 0.69955772     | 0.78010166     | 0.7862681      | 1.659E-09 | Inf       | up        | hypothetical protein JAAARDRAFT_31728 [Jaapia argillacea MUCL 33604]                                 |

| #ID             | 0 h-1<br>FPKM | 0 h-2<br>FPKM | 0 h-3<br>FPKM | 48 h-1<br>FPKM | 48 h-2<br>FPKM | 48 h-3<br>FPKM | FDR       | log2FC    | regulated | nr_annotation                                                                                                    |
|-----------------|---------------|---------------|---------------|----------------|----------------|----------------|-----------|-----------|-----------|------------------------------------------------------------------------------------------------------------------|
| c47028.graph_c0 | 2.05268382    | 2.44186406    | 1.72029129    | 1.31552433     | 1.16136542     | 1.75581845     | 3.618E-05 | -1.570214 | down      | PREDICTED: probable LRR receptor-like serine/threonine-protein kinase At4g36180 [Sesamum indicum]                |
| c47029.graph_c0 | 0.07593404    | 0             | 0.19515649    | 1.53901853     | 1.77862202     | 1.86737651     | 1.73E-07  | 3.219418  | up        | PREDICTED: uncharacterized protein LOC105170663 [Sesamum indicum]                                                |
| c47033.graph_c0 | 27.1938824    | 27.5824552    | 24.7994467    | 9.31165208     | 10.1355708     | 9.18835385     | 1.872E-67 | -2.491795 | down      | PREDICTED: protein CHROMATIN REMODELING 5 isoform X2 [Sesamum indicum]                                           |
| c47033.graph_c2 | 1.61314425    | 1.67686571    | 2.07295423    | 0.45727191     | 1.15050733     | 2.13610842     | 0.0022823 | -1.555586 | down      | PREDICTED: probable receptor-like protein kinase At5g24010 [Sesamum indicum]                                     |
| c47033.graph_c3 | 2.85110597    | 1.70444889    | 1.22126135    | 24.0044321     | 31.0336131     | 32.6552482     | 1.252E-30 | 2.908559  | up        | PREDICTED: polyadenylate-binding protein-interacting protein 9 [Sesamum indicum]                                 |
| c47033.graph_c4 | 1.32063384    | 1.68549423    | 1.44250676    | 0.36499621     | 1.03111794     | 1.24495716     | 7.722E-05 | -1.786259 | down      | PREDICTED: probable receptor-like protein kinase At5g24010 [Sesamum indicum]                                     |
| c47034.graph_c0 | 0.91002078    | 0.82812003    | 1.11625761    | 12.2706955     | 12.9589435     | 11.5287359     | 8.94E-17  | 2.666515  | up        | PREDICTED: primase homolog protein isoform X2 [Sesamum indicum]                                                  |
| c47036.graph_c0 | 4.378654      | 3.05247328    | 2.81337187    | 0              | 0              | 0              | 8.808E-26 | -Inf      | down      | hypothetical protein SNOG_05978 [Phaeosphaeria nodorum SN15]                                                     |
| c47037.graph_c0 | 32.9645728    | 33.5582204    | 33.9811606    | 20.3443583     | 20.1077465     | 21.4144816     | 2.047E-29 | -1.717966 | down      | PREDICTED: L-2-hydroxyglutarate dehydrogenase, mitochondrial isoform X1 [Sesamum indicum]                        |
| c47037.graph_c1 | 27.1154278    | 23.9113203    | 17.0073849    | 1.18954765     | 1.57522687     | 2.38151778     | 3.17E-22  | -4.745769 | down      | glyceraldehyde-3-phosphate dehydrogenase [Leucophyllum frutescens]                                               |
| c47037.graph_c3 | 252.046144    | 242.631421    | 248.036854    | 1590.49944     | 1695.76144     | 1781.43725     | 2.466E-25 | 1.751463  | up        | glyceraldehyde 3-phosphate dehydrogenase [Sesamum indicum]                                                       |
| c47037.graph_c4 | 67.8617337    | 63.2782961    | 76.63094      | 3.83495318     | 3.40130334     | 4.28523691     | 3.318E-94 | -5.191244 | down      | PREDICTED: glyceraldehyde-3-phosphate dehydrogenase, cytosolic [Sesamum indicum]                                 |
| c47049.graph_c0 | 16.1878922    | 15.1297968    | 14.2511503    | 9.92849573     | 10.9981137     | 9.12757109     | 8.021E-18 | -1.617395 | down      | PREDICTED: lycopene beta cyclase, chloroplastic/chromoplastic [Sesamum indicum]                                  |
| c47049.graph_c1 | 9.83851594    | 9.92459348    | 9.08095586    | 4.74240297     | 4.44430849     | 4.18230814     | 6.518E-39 | -2.124145 | down      | PREDICTED: uncharacterized protein At5g05190 [Sesamum indicum]                                                   |
| c47051.graph_c0 | 46.7080568    | 51.5133968    | 42.9557578    | 45.9501876     | 44.1863709     | 46.1438814     | 3.441E-12 | -1.066655 | down      | PREDICTED: nuclear transcription factor Y subunit C-9-like isoform X1 [Sesamum indicum]                          |
| c47051.graph_c1 | 36.2044343    | 35.7173563    | 35.2710022    | 34.7386144     | 30.4232995     | 28.1245414     | 3.14E-14  | -1.214387 | down      | PREDICTED: probable ribonuclease P/MRP protein subunit POP5 [Sesamum indicum]                                    |
| c47052.graph_c0 | 0             | 0             | 0             | 2.17934882     | 1.9692329      | 1.36882692     | 2.615E-11 | Inf       | up        | PREDICTED: putative germin-like protein 2-1 [Sesamum indicum]                                                    |
| c47053.graph_c0 | 6.40695285    | 11.8400648    | 12.033121     | 11.350967      | 3.3669925      | 4.84801066     | 0.0057985 | -1.629612 | down      | -                                                                                                                |
| c47064.graph_c0 | 122.479737    | 121.544928    | 116.027181    | 71.0450917     | 77.1437353     | 73.9127186     | 1.618E-32 | -1.715102 | down      | PREDICTED: pentatricopeptide repeat-containing protein At3g46790, chloroplastic-like [Nicotiana tomentosiformis] |
| c47064.graph_c1 | 0.89495602    | 0.73587858    | 0.28751348    | 6.0659044      | 7.26834473     | 9.03934376     | 3.658E-12 | 2.530917  | up        | lipoxygenase [Actinidia arguta]                                                                                  |

| #ID             | 0 h-1<br>FPKM | 0 h-2<br>FPKM | 0 h-3<br>FPKM | 48 h-1<br>FPKM | 48 h-2<br>FPKM | 48 h-3<br>FPKM | FDR       | log2FC    | regulated | nr_annotation                                                                                         |
|-----------------|---------------|---------------|---------------|----------------|----------------|----------------|-----------|-----------|-----------|-------------------------------------------------------------------------------------------------------|
| c47064.graph_c2 | 61.5252139    | 62.2719659    | 59.6143693    | 28.9360563     | 22.3412279     | 21.757259      | 3.75E-59  | -2.340026 | down      | PREDICTED: RNA pseudouridine synthase 6, chloroplastic [Sesamum indicum]                              |
| c47065.graph_c0 | 0             | 0             | 0             | 17.3014338     | 31.8949483     | 9.27319252     | 5.419E-08 | Inf       | up        | predicted protein [Physcomitrella patens]                                                             |
| c47067.graph_c0 | 1.64347234    | 2.58518548    | 2.21249498    | 0.54074068     | 0.45827935     | 0.41699477     | 6.39E-12  | -3.200027 | down      | -                                                                                                     |
| c47068.graph_c0 | 1.61141186    | 1.55098601    | 1.39375926    | 6.33783408     | 8.68002632     | 8.86549081     | 4.895E-06 | 1.368214  | up        | hypothetical protein MIMGU_mgv1a009241mg [Erythranthe guttata]                                        |
| c47069.graph_c0 | 28.0906474    | 24.8591972    | 26.316961     | 120.900898     | 169.930743     | 193.381122     | 2.626E-08 | 1.586659  | up        | PREDICTED: 60S ribosomal protein L27a-3-like [Sesamum indicum]                                        |
| c47072.graph_c0 | 0             | 0             | 0             | 4.45124666     | 5.92467304     | 2.33579302     | 1.381E-06 | Inf       | up        | hypothetical protein GUITHDRAFT_106940 [Guillardia theta CCMP2712]                                    |
| c47073.graph_c0 | 0             | 0             | 0             | 21.2946952     | 36.1339833     | 21.151135      | 1.575E-21 | Inf       | up        | component of cytosolic 80S ribosome and 40S small subunit [Volvox carteri f. nagariensis]             |
| c47075.graph_c0 | 36.5411009    | 37.9470607    | 31.3528357    | 29.2465328     | 31.2997312     | 31.3413628     | 1.709E-18 | -1.220918 | down      | PREDICTED: zinc finger CCCH domain-containing protein 19 [Sesamum indicum]                            |
| c47078.graph_c0 | 40.1341192    | 38.9268861    | 37.4440877    | 23.8221697     | 24.3066446     | 20.5658761     | 1.388E-36 | -1.778043 | down      | PREDICTED: signal peptide peptidase-like 4 isoform X1 [Sesamum indicum]                               |
| c47081.graph_c0 | 1.71550716    | 1.52642221    | 1.98676676    | 7.59000035     | 9.96300819     | 12.2744227     | 7.895E-07 | 1.486132  | up        | hypothetical protein MIMGU_mgv1a0002972mg, partial [Erythranthe guttata]                              |
| c47082.graph_c2 | 6.89630178    | 7.22771713    | 7.08204228    | 29.2144255     | 32.1859565     | 32.6867952     | 2.882E-12 | 1.130039  | up        | PREDICTED: uncharacterized protein LOC103719963 isoform X1 [Phoenix dactylifera]                      |
| c47083.graph_c0 | 1.55411614    | 1.69179368    | 1.57271686    | 0.23265989     | 0.34127299     | 0.46181244     | 3.904E-15 | -3.244001 | down      | PREDICTED: pleiotropic drug resistance protein 2-like [Sesamum indicum]                               |
| c47085.graph_c0 | 227.289717    | 228.624879    | 221.957023    | 183.105843     | 198.297911     | 198.060931     | 5.129E-16 | -1.244942 | down      | hypothetical protein MIMGU_mgv1a006811mg [Erythranthe guttata]                                        |
| c47086.graph_c0 | 56.3256488    | 52.4709027    | 46.2040406    | 32.2346193     | 36.9765404     | 35.3758765     | 1.567E-28 | -1.585415 | down      | hypothetical protein MIMGU_mgv1a001579mg [Erythranthe guttata]                                        |
| c47088.graph_c0 | 7.75824143    | 8.73952708    | 7.78257375    | 37.6103823     | 39.5416303     | 40.9485717     | 1.518E-17 | 1.26395   | up        | PREDICTED: serine/threonine-protein kinase D6PKL2-like [Sesamum indicum]                              |
| c47102.graph_c0 | 4.81657012    | 3.97340946    | 4.66543967    | 49.769546      | 63.68551       | 68.9467444     | 1.673E-33 | 2.737964  | up        | PREDICTED: dolichyl-diphosphooligosaccharide--protein glycosyltransferase subunit 2 [Sesamum indicum] |
| c47103.graph_c0 | 3.49395298    | 4.18709       | 3.85749215    | 12.6034134     | 18.4907859     | 18.5966097     | 1.832E-05 | 1.081808  | up        | PREDICTED: uncharacterized protein LOC105164063 [Sesamum indicum]                                     |
| c47103.graph_c2 | 398.471809    | 399.301431    | 397.543187    | 174.490548     | 166.738283     | 164.177297     | 2.871E-50 | -2.258247 | down      | PREDICTED: two-pore potassium channel 1 [Sesamum indicum]                                             |
| c47105.graph_c0 | 48.8088317    | 44.366608     | 52.1512602    | 1.62829089     | 3.05188196     | 2.7862374      | 5.51E-136 | -5.311572 | down      | R3-MYB anthocyanin repressor [Petunia x hybrida]                                                      |
| c47107.graph_c0 | 45.672473     | 42.5626968    | 43.9318457    | 8.9826153      | 7.67957226     | 7.37169214     | 7.56E-118 | -3.473026 | down      | hypothetical protein MIMGU_mgv1a008454mg [Erythranthe guttata]                                        |

| #ID             | 0 h-1<br>FPKM | 0 h-2<br>FPKM | 0 h-3<br>FPKM | 48 h-1<br>FPKM | 48 h-2<br>FPKM | 48 h-3<br>FPKM | FDR       | log2FC    | regulated | nr_annotation                                                                                |
|-----------------|---------------|---------------|---------------|----------------|----------------|----------------|-----------|-----------|-----------|----------------------------------------------------------------------------------------------|
| c47111.graph_c0 | 6.25376666    | 5.92164892    | 5.90779424    | 4.57795962     | 5.37766175     | 6.26256906     | 1.771E-06 | -1.178185 | down      | PREDICTED: putative white-brown complex homolog protein 30 [Sesamum indicum]                 |
| c47114.graph_c0 | 0             | 0.0349816     | 0             | 3.70243524     | 4.26334912     | 4.2684025      | 1.073E-19 | 7.441706  | up        | PREDICTED: subtilisin-like protease SB13.5 [Sesamum indicum]                                 |
| c47116.graph_c0 | 19.7034079    | 19.1324082    | 18.4944944    | 15.3338345     | 15.339263      | 14.9668841     | 1.154E-21 | -1.345655 | down      | hypothetical protein JCGZ_07037 [Jatropha curcas]                                            |
| c47120.graph_c0 | 12.9238548    | 12.9367961    | 12.3946912    | 9.84895974     | 9.22809751     | 9.81517057     | 5.433E-12 | -1.421158 | down      | hypothetical protein MIMGU_mgv1a010617mg [Erythranthe guttata]                               |
| c47126.graph_c0 | 30.6717857    | 33.7837532    | 30.2318789    | 20.7622013     | 21.9950347     | 23.6107778     | 2.829E-21 | -1.531212 | down      | PREDICTED: INO80 complex subunit D-like [Sesamum indicum]                                    |
| c47127.graph_c0 | 0             | 0.45289803    | 0             | 24.5924873     | 30.0269079     | 33.7505848     | 1.183E-13 | 6.597939  | up        | -                                                                                            |
| c47130.graph_c0 | 36.5491793    | 36.8770078    | 31.2646948    | 633.157988     | 352.058951     | 282.226695     | 0.0013913 | 2.596117  | up        | PREDICTED: uncharacterized protein LOC105169217 [Sesamum indicum]                            |
| c47131.graph_c0 | 38.0367345    | 31.9165308    | 37.9323113    | 152.375133     | 160.152839     | 136.794767     | 1.265E-13 | 1.04041   | up        | PREDICTED: remorin-like [Sesamum indicum]                                                    |
| c47134.graph_c0 | 33.974959     | 34.7371813    | 31.2031666    | 10.5963367     | 12.3960596     | 13.5384403     | 3.761E-65 | -2.471606 | down      | PREDICTED: dynamin-related protein 4C-like [Sesamum indicum]                                 |
| c47142.graph_c0 | 1.01793628    | 0.81100547    | 0.85426183    | 355.919746     | 523.135049     | 527.008007     | 3.26E-79  | 8.010174  | up        | hypothetical protein MIMGU_mgv1a004716mg [Erythranthe guttata]                               |
| c47143.graph_c0 | 3.14062802    | 4.16549907    | 3.32956086    | 18.2281137     | 17.6246409     | 18.0214066     | 2.577E-05 | 1.324287  | up        | PREDICTED: 15-cis-phytoene desaturase, chloroplastic/chromoplastic [Sesamum indicum]         |
| c47144.graph_c1 | 0             | 0             | 0             | 5.07788897     | 6.9018815      | 5.88228264     | 5.269E-14 | Inf       | up        | repute meumonine sulfoxide reductase [Ectocarpus siliculosus]                                |
| c47145.graph_c0 | 88.0486774    | 91.6675493    | 90.4272971    | 81.6377031     | 71.3556414     | 75.2465229     | 4.384E-19 | -1.258498 | down      | PREDICTED: uncharacterized protein LOC105156360 [Sesamum indicum]                            |
| c47147.graph_c0 | 11.76611      | 11.9960011    | 10.0488338    | 6.13357961     | 9.00238418     | 11.014474      | 1.499E-16 | -1.394524 | down      | PREDICTED: CDT1-like protein a, chloroplastic [Sesamum indicum]                              |
| c47150.graph_c1 | 0.20756529    | 0.10388657    | 0.40009443    | 7.45768478     | 7.19149236     | 7.62833772     | 1.805E-20 | 3.940779  | up        | hypothetical protein MIMGU_mgv1a011470mg [Erythranthe guttata]                               |
| c47165.graph_c0 | 0             | 0             | 0             | 25.4159255     | 43.1117296     | 23.2118128     | 1.022E-18 | Inf       | up        | 40S ribosomal protein S8-B [Rozella allomycis CSF55]                                         |
| c47166.graph_c0 | 154.787709    | 159.036635    | 155.603271    | 105.479796     | 113.148243     | 113.491861     | 3.436E-23 | -1.517933 | down      | PREDICTED: splicing factor U2af large subunit B isoform X2 [Sesamum indicum]                 |
| c47166.graph_c1 | 2.54027767    | 2.27037623    | 2.68143642    | 0.16716211     | 0.17708798     | 0.07436992     | 1.183E-15 | -5.17578  | down      | -                                                                                            |
| c47173.graph_c0 | 0.25566919    | 0.25592521    | 0.39425405    | 2.30828355     | 2.59506163     | 3.14371963     | 6.509E-05 | 2.125035  | up        | PREDICTED: alpha-N-acetylglucosaminidase-like [Sesamum indicum]                              |
| c47175.graph_c0 | 5.75987232    | 4.30643479    | 5.57409262    | 3.27553708     | 4.68454638     | 4.05122894     | 4.083E-07 | -1.404602 | down      | PREDICTED: O-acyltransferase WSD1-like isoform X1 [Sesamum indicum]                          |
| c47176.graph_c0 | 463.042836    | 472.071847    | 416.757961    | 101.983206     | 119.644961     | 120.872392     | 5.922E-75 | -3.000082 | down      | PREDICTED: very-long-chain (3R)-3-hydroxyacyl-CoA dehydratase PASTICCINO 2 [Sesamum indicum] |
| c47176.graph_c1 | 11.3696656    | 12.6456118    | 14.204624     | 1.45478855     | 2.4658753      | 3.62449389     | 6.673E-11 | -3.371578 | down      | -                                                                                            |

| #ID             | 0 h-1<br>FPKM | 0 h-2<br>FPKM | 0 h-3<br>FPKM | 48 h-1<br>FPKM | 48 h-2<br>FPKM | 48 h-3<br>FPKM | FDR       | log2FC    | regulated | nr_annotation                                                                                  |
|-----------------|---------------|---------------|---------------|----------------|----------------|----------------|-----------|-----------|-----------|------------------------------------------------------------------------------------------------|
| c47178.graph_c2 | 0.87416788    | 0.87504323    | 1.05726149    | 42.6356718     | 39.0948286     | 36.6302467     | 4.402E-70 | 4.380965  | up        | PREDICTED: uncharacterized protein LOC105158099 [Sesamum indicum]                              |
| c47182.graph_c0 | 15.0968758    | 16.4675539    | 13.083777     | 165.512518     | 110.089519     | 90.8218714     | 0.0002438 | 2.031258  | up        | PREDICTED: fructose-1,6-bisphosphatase, cytosolic [Sesamum indicum]                            |
| c47184.graph_c2 | 14.1375266    | 14.4634706    | 13.0528692    | 8.14623542     | 9.72769162     | 10.9507237     | 1.529E-24 | -1.551803 | down      | PREDICTED: myosin-6-like [Sesamum indicum]                                                     |
| c47184.graph_c4 | 12.7942346    | 15.6758244    | 10.1277164    | 6.97783498     | 5.69396882     | 7.04786744     | 1.45E-10  | -1.980967 | down      | PREDICTED: calcium-dependent protein kinase 10-like [Sesamum indicum]                          |
| c47185.graph_c0 | 1.15154259    | 1.56171674    | 1.33657352    | 9.03455813     | 10.8399039     | 10.9925806     | 4.178E-10 | 1.908876  | up        | PREDICTED: protein LOW PSII ACCUMULATION 1, chloroplastic [Sesamum indicum]                    |
| c47185.graph_c1 | 0.33072419    | 0.60693484    | 0.92081965    | 2.69138151     | 4.572667       | 6.50655873     | 0.003306  | 1.852061  | up        | PREDICTED: rapid alkalization factor-like [Sesamum indicum]                                    |
| c47186.graph_c0 | 39.490125     | 41.8058489    | 38.6685423    | 14.0705319     | 13.6484423     | 11.8053409     | 2.64E-66  | -2.617053 | down      | PREDICTED: BTB/POZ domain-containing protein At1g04390 [Sesamum indicum]                       |
| c47186.graph_c1 | 42.6558914    | 41.117175     | 37.8349306    | 13.8268592     | 13.9470252     | 12.067591      | 2.462E-52 | -2.625233 | down      | PREDICTED: BTB/POZ domain-containing protein At1g04390 [Sesamum indicum]                       |
| c47188.graph_c1 | 51.8692558    | 52.1398106    | 54.6563188    | 208.671042     | 222.100765     | 233.318019     | 1.952E-13 | 1.04585   | up        | PREDICTED: 60S acidic ribosomal protein P1-like [Sesamum indicum]                              |
| c47189.graph_c1 | 42.9880869    | 50.8915353    | 46.4177896    | 33.4122392     | 36.3586509     | 36.3167186     | 3.452E-23 | -1.4224   | down      | PREDICTED: inactive rhomboid protein 1-like [Sesamum indicum]                                  |
| c47189.graph_c3 | 9.8133779     | 9.61270728    | 8.42206535    | 6.50609231     | 6.63587436     | 6.82335946     | 4.391E-20 | -1.49654  | down      | PREDICTED: probable apyrase 7 [Sesamum indicum]                                                |
| c47197.graph_c0 | 0.40936998    | 0.29026076    | 0.24110929    | 1.74426476     | 1.98101445     | 2.64265639     | 4.189E-05 | 1.741352  | up        | PREDICTED: acyltransferase-like protein At1g54570, chloroplastic isoform X1 [Nelumbo nucifera] |
| c47199.graph_c0 | 0             | 0             | 0             | 32.4175805     | 63.5620776     | 29.4293045     | 8.806E-15 | Inf       | up        | RecName: Full=60S ribosomal protein L13a [Cyanophora paradoxa]                                 |
| c47200.graph_c0 | 0             | 0             | 0             | 15.2795572     | 27.1021006     | 6.19878665     | 7.232E-07 | Inf       | up        | --                                                                                             |
| c47201.graph_c0 | 8.70754544    | 7.86230636    | 8.61897049    | 100.437092     | 88.7727056     | 86.2816654     | 3.511E-37 | 2.436136  | up        | PREDICTED: probable serine/threonine-protein kinase At1g01540 [Sesamum indicum]                |
| c47202.graph_c1 | 0             | 0             | 0.05051321    | 1.15883909     | 1.95656639     | 0.80556879     | 1.594E-05 | 5.223546  | up        | -                                                                                              |
| c47205.graph_c0 | 0.77524342    | 0.51734647    | 0.79697479    | 6.9039798      | 7.01128409     | 5.42289188     | 4.845E-07 | 2.192573  | up        | unnamed protein product [Vitis vinifera]                                                       |
| c47206.graph_c0 | 15.7871858    | 9.25087252    | 10.2685883    | 0              | 0              | 0              | 1.187E-40 | -Inf      | down      | alpha-2 macroglobulin family-like protein [Micromonas sp. RCC299]                              |
| c47207.graph_c0 | 39.2797961    | 37.869003     | 34.4131004    | 182.651484     | 226.056319     | 188.478241     | 2.326E-23 | 1.401438  | up        | hypothetical protein MIMGU_mgv1a001548mg [Erythranthe guttata]                                 |
| c47210.graph_c0 | 0             | 0             | 0             | 2.02643002     | 2.36581372     | 2.06069171     | 5.637E-13 | Inf       | up        | hypothetical protein V492_07146 [Pseudogymnoascus pannorum VKM F-4246]                         |
| c47211.graph_c0 | 0.17719087    | 0.1773683     | 0.19923512    | 2.65264647     | 1.42669524     | 1.76115355     | 0.0001373 | 2.390798  | up        | PREDICTED: uncharacterized protein LOC104880154 [Vitis vinifera]                               |
| c47214.graph_c1 | 3.53836707    | 3.52044408    | 3.47221008    | 2.84489414     | 2.51151698     | 2.60168552     | 5.329E-08 | -1.419204 | down      | PREDICTED: protein LONGIFOLIA 2-LIKE [Sesamum indicum]                                         |

| #ID             | 0 h-1<br>FPKM | 0 h-2<br>FPKM | 0 h-3<br>FPKM | 48 h-1<br>FPKM | 48 h-2<br>FPKM | 48 h-3<br>FPKM | FDR       | log2FC    | regulated | nr_annotation                                                                         |
|-----------------|---------------|---------------|---------------|----------------|----------------|----------------|-----------|-----------|-----------|---------------------------------------------------------------------------------------|
| c47218.graph_c1 | 24.5605814    | 24.6833196    | 26.049113     | 22.5139014     | 21.506342      | 20.012641      | 1.053E-17 | -1.250288 | down      | PREDICTED: KH domain-containing protein At4g18375-like [Sesamum indicum]              |
| c47221.graph_c0 | 6.51291471    | 6.30913201    | 5.77755354    | 92.5954286     | 109.699188     | 102.161905     | 2.45E-82  | 3.013952  | up        | hypothetical protein MIMGU_mgv1a010747mg [Erythranthe guttata]                        |
| c47222.graph_c0 | 0.54154259    | 0.49691113    | 0.57991973    | 2.97263847     | 3.0610619      | 4.16176967     | 2.02E-05  | 1.633778  | up        | hypothetical protein MIMGU_mgv1a000984mg [Erythranthe guttata]                        |
| c47224.graph_c0 | 0.10302809    | 0.06875417    | 0             | 1.01243944     | 0.90496981     | 0.78825471     | 3.762E-06 | 2.980681  | up        | -                                                                                     |
| c47226.graph_c1 | 1.28941407    | 1.46512485    | 1.79129527    | 7.54472163     | 8.57091432     | 8.17016557     | 5.574E-06 | 1.394838  | up        | hypothetical protein MIMGU_mgv1a008054mg [Erythranthe guttata]                        |
| c47233.graph_c0 | 9.60038565    | 8.52548499    | 9.66839785    | 8.34543867     | 6.96117056     | 5.99485129     | 5.66E-13  | -1.396948 | down      | PREDICTED: glycerophosphodiester phosphodiesterase GPPD4 isoform X3 [Sesamum indicum] |
| c47234.graph_c0 | 179.270387    | 158.829879    | 176.282782    | 17.3362061     | 19.5610029     | 23.275392      | 7.31E-149 | -4.116945 | down      | PREDICTED: uncharacterized protein LOC105178088 [Sesamum indicum]                     |
| c47234.graph_c3 | 71.2458435    | 69.2673502    | 78.725243     | 452.536866     | 505.139577     | 509.538211     | 4.417E-35 | 1.721712  | up        | hypoteucal protein OsJ_19397 [Oryza sativa japonica Group]                            |
| c47234.graph_c6 | 65.6647471    | 70.6830291    | 59.3397382    | 39.0378072     | 43.1624715     | 41.7158351     | 5.809E-33 | -1.676909 | down      | PREDICTED: uncharacterized protein LOC105169758 [Sesamum indicum]                     |
| c47235.graph_c0 | 25.0054393    | 25.482642     | 26.6185456    | 9.00658378     | 7.7464697      | 7.35278263     | 1.221E-62 | -2.692081 | down      | PREDICTED: aspartic proteinase-like protein 1 isoform X1 [Sesamum indicum]            |
| c47238.graph_c0 | 3.17265212    | 3.22322949    | 3.04252507    | 13.5672779     | 12.7322509     | 14.2264249     | 3.891E-08 | 1.085673  | up        | PREDICTED: WUSCHEL-related homeobox 8 [Sesamum indicum]                               |
| c47239.graph_c0 | 108.309949    | 111.207238    | 107.326854    | 37.7133961     | 34.7130626     | 30.7232157     | 1.785E-71 | -2.678484 | down      | PREDICTED: transcription factor G1E8 [Sesamum indicum]                                |
| c47240.graph_c0 | 1.36206804    | 0.43824598    | 0.71887788    | 0              | 0              | 0              | 1.167E-07 | -Inf      | down      | sucrose synthase 1 [Oncidium hybrid cultivar]                                         |
| c47246.graph_c0 | 0             | 0             | 0             | 9.85104757     | 9.14759653     | 7.79146924     | 2.355E-23 | Inf       | up        | allergen Ale o 13 [Metarhizium acridum CQMa 102]                                      |
| c47250.graph_c1 | 2.91526028    | 1.93114818    | 2.75457712    | 1.50084795     | 1.96653741     | 2.10859813     | 0.0003413 | -1.470654 | down      | PREDICTED: uncharacterized protein LOC105163644 [Sesamum indicum]                     |
| c47250.graph_c3 | 74.8056247    | 74.3808517    | 79.9999135    | 311.927852     | 337.409503     | 328.350237     | 7.478E-15 | 1.073372  | up        | PREDICTED: 60S ribosomal protein L6-like [Sesamum indicum]                            |
| c47253.graph_c0 | 1171.19964    | 1109.53842    | 1166.40438    | 674.59415      | 595.219902     | 495.510692     | 1.055E-28 | -1.979117 | down      | PREDICTED: ABC transporter G family member 3 [Sesamum indicum]                        |
| c47259.graph_c0 | 31.5861763    | 33.5153306    | 31.0217555    | 17.632081      | 20.7966054     | 20.1260007     | 9.375E-34 | -1.734971 | down      | PREDICTED: uncharacterized protein LOC105174955 isoform X1 [Sesamum indicum]          |
| c47266.graph_c0 | 0             | 0             | 0             | 1.58430503     | 2.21240878     | 1.6019376      | 8.39E-21  | Inf       | up        | --                                                                                    |
| c47269.graph_c0 | 30.0996563    | 31.892566     | 29.9059188    | 15.4997166     | 25.3043595     | 27.4720661     | 1.965E-23 | -1.454899 | down      | PREDICTED: uncharacterized protein LOC105174622 [Sesamum indicum]                     |
| c47269.graph_c1 | 59.7904738    | 62.7437367    | 62.0786895    | 44.8503879     | 45.7373402     | 44.4490427     | 3.072E-25 | -1.468945 | down      | PREDICTED: uncharacterized protein LOC105168306 isoform X2 [Sesamum indicum]          |
| c47270.graph_c0 | 5.09966745    | 3.14139938    | 3.94113016    | 0              | 0              | 0              | 2.702E-35 | -Inf      | down      | -                                                                                     |

| #ID             | 0 h-1<br>FPKM | 0 h-2<br>FPKM | 0 h-3<br>FPKM | 48 h-1<br>FPKM | 48 h-2<br>FPKM | 48 h-3<br>FPKM | FDR       | log2FC    | regulated | nr_annotation                                                                                     |
|-----------------|---------------|---------------|---------------|----------------|----------------|----------------|-----------|-----------|-----------|---------------------------------------------------------------------------------------------------|
| c47271.graph_c0 | 0             | 0             | 0             | 1.02429284     | 0.76596287     | 0.77737879     | 2.134E-11 | Inf       | up        | -                                                                                                 |
| c47274.graph_c0 | 0             | 0             | 0             | 2.34708602     | 5.75567833     | 0.81216451     | 0.0018545 | Inf       | up        | -                                                                                                 |
| c47277.graph_c0 | 65.7468331    | 64.0880763    | 63.1333548    | 69.2231669     | 67.475546      | 58.2230688     | 1.566E-12 | -1.000912 | down      | PREDICTED: uncharacterized protein LOC105171105 isoform X1 [Sesamum indicum]                      |
| c47277.graph_c1 | 62.921997     | 67.0361067    | 56.6805659    | 36.1633261     | 36.3827829     | 33.3429894     | 7.24E-36  | -1.833206 | down      | PREDICTED: zinc finger CCCH domain-containing protein 44-like isoform X4 [Sesamum indicum]        |
| c47287.graph_c0 | 36.5231047    | 35.0221205    | 31.4718537    | 28.7733006     | 26.5258487     | 28.4353523     | 9.63E-19  | -1.313933 | down      | PREDICTED: GATA transcription factor 15-like [Sesamum indicum]                                    |
| c47290.graph_c0 | 0             | 0             | 0             | 5.98378327     | 5.68707183     | 4.07691889     | 4.257E-24 | Inf       | up        | --                                                                                                |
| c47293.graph_c0 | 1.03268034    | 0.91028582    | 0.75264678    | 5.46684189     | 6.30290935     | 5.92567861     | 6.788E-11 | 1.697903  | up        | PREDICTED: uncharacterized protein LOC105174459 isoform X2 [Sesamum indicum]                      |
| c47294.graph_c0 | 3.57713678    | 2.97327538    | 2.38046624    | 23.7451948     | 22.7549726     | 19.1909133     | 2.026E-17 | 1.86716   | up        | PREDICTED: uncharacterized protein LOC105159979 [Sesamum indicum]                                 |
| c47295.graph_c0 | 0             | 0             | 0             | 2.33984459     | 2.77387468     | 1.6854121      | 5.28E-16  | Inf       | up        | --                                                                                                |
| c47296.graph_c0 | 166.821295    | 170.652449    | 175.434841    | 127.957725     | 133.901769     | 125.413872     | 1.217E-23 | -1.42361  | down      | PREDICTED: NEDD8-activating enzyme E1 catalytic subunit [Sesamum indicum]                         |
| c47296.graph_c2 | 24.5949374    | 23.1021809    | 20.8430515    | 22.6933734     | 22.7278756     | 21.4971686     | 6.61E-14  | -1.05002  | down      | PREDICTED: uncharacterized protein At1g10890 isoform X2 [Sesamum indicum]                         |
| c47297.graph_c0 | 318.434749    | 304.932656    | 307.966573    | 279.229494     | 259.106715     | 238.905926     | 5.611E-17 | -1.276038 | down      | PREDICTED: pentatricopeptide repeat-containing protein At5g15340, mitochondrial [Sesamum indicum] |
| c47300.graph_c0 | 161.61969     | 170.012016    | 149.513931    | 28.4569723     | 29.3101636     | 33.9866606     | 4.82E-111 | -3.408748 | down      | PREDICTED: chaperone protein ClpD, chloroplastic [Sesamum indicum]                                |
| c47301.graph_c0 | 8.68661381    | 9.53062569    | 7.88103244    | 5.7148734      | 5.46547484     | 5.72790387     | 3.551E-28 | -1.641754 | down      | PREDICTED: midasin [Sesamum indicum]                                                              |
| c47302.graph_c1 | 2.07434105    | 2.44186779    | 1.91923947    | 12.4751273     | 12.9729456     | 11.6580286     | 8.213E-16 | 1.511631  | up        | PREDICTED: paladin [Sesamum indicum]                                                              |
| c47303.graph_c0 | 3.95417446    | 2.17697368    | 2.37125967    | 2.36784822     | 2.70140562     | 2.37701213     | 0.0052279 | -1.206686 | down      | hypothetical protein M569_00480, partial [Genlisea aurea]                                         |
| c47315.graph_c0 | 9.77123146    | 10.2157277    | 9.46560838    | 3.29300118     | 3.58634486     | 3.40931341     | 4.748E-50 | -2.535496 | down      | PREDICTED: uncharacterized protein LOC105167449 isoform X2 [Sesamum indicum]                      |
| c47316.graph_c0 | 4.10239494    | 4.36862007    | 5.1034929     | 1.60825268     | 1.7037487      | 1.53833958     | 2.919E-12 | -2.504696 | down      | PREDICTED: putative pentatricopeptide repeat-containing protein At1g53330 [Sesamum indicum]       |
| c47317.graph_c0 | 15.8130088    | 15.1183215    | 16.2157346    | 18.9637981     | 14.3169007     | 13.7706324     | 3.811E-09 | -1.014791 | down      | PREDICTED: histone-lysine N-methyltransferase ASHH3-like [Sesamum indicum]                        |
| c47323.graph_c0 | 4.13565675    | 2.51987703    | 2.77277356    | 27.9126605     | 55.2793766     | 20.193489      | 0.0055528 | 2.432698  | up        | component of cytosolic 80S ribosome and 40S small subunit [Volvox carteri f. nagariensis]         |
| c47327.graph_c0 | 5.97779165    | 3.08805661    | 3.81341483    | 0              | 0              | 0              | 6.006E-27 | -Inf      | down      | alpha-2 macroglobulin family-like protein [Micromonas sp. RCC299]                                 |
| c47329.graph_c0 | 0             | 0             | 0             | 9.27296399     | 37.7593892     | 6.3601671      | 0.0015236 | Inf       | up        | -                                                                                                 |

| #ID             | 0 h-1<br>FPKM | 0 h-2<br>FPKM | 0 h-3<br>FPKM | 48 h-1<br>FPKM | 48 h-2<br>FPKM | 48 h-3<br>FPKM | FDR       | log2FC    | regulated | nr_annotation                                                                      |
|-----------------|---------------|---------------|---------------|----------------|----------------|----------------|-----------|-----------|-----------|------------------------------------------------------------------------------------|
| c47331.graph_c0 | 15.4930184    | 17.4470989    | 15.879911     | 11.2712803     | 11.6405409     | 14.5145017     | 1.647E-17 | -1.402991 | down      | PREDICTED: uncharacterized protein LOC104812881 [Tarenaya hassleriana]             |
| c47334.graph_c0 | 477.83099     | 438.829954    | 522.768726    | 60.0920324     | 58.54587       | 51.7738781     | 5.612E-91 | -4.0957   | down      | PREDICTED: em-like protein GEA6 [Sesamum indicum]                                  |
| c47334.graph_c2 | 67.917916     | 64.7581071    | 65.3499988    | 51.4921707     | 53.3367669     | 55.0690191     | 5.062E-21 | -1.326637 | down      | PREDICTED: probable E3 ubiquitin-protein ligase ARI8 [Sesamum indicum]             |
| c47345.graph_c0 | 0             | 0             | 0.27463156    | 20.3778783     | 32.4339814     | 15.3290815     | 2.882E-12 | 6.900575  | up        | PREDICTED: 40S ribosomal protein S24-1-like [Musa acuminata subsp. malaccensis]    |
| c47346.graph_c0 | 0             | 2.0899367     | 1.60977889    | 70.7833262     | 86.8048521     | 102.346689     | 1.12E-24  | 5.104519  | up        | PREDICTED: probable aquaporin PIP-type pTOM75 [Sesamum indicum]                    |
| c47346.graph_c1 | 45.0719357    | 49.3725165    | 46.1958131    | 301.539957     | 310.450408     | 303.271462     | 4.69E-28  | 1.684471  | up        | PREDICTED: BTB/POZ domain-containing protein At5g41330-like [Sesamum indicum]      |
| c47348.graph_c0 | 23.7092651    | 25.8805406    | 19.1569613    | 24.9339224     | 20.2403541     | 19.5255315     | 1.616E-08 | -1.097929 | down      | hypothetical protein MIMGU_mgv1a010183mg [Erythranthe guttata]                     |
| c47349.graph_c0 | 1.34228618    | 2.39516702    | 0.82494782    | 7.90349707     | 11.5624337     | 11.1945666     | 6.048E-06 | 1.73084   | up        | Ubiquitin carboxyl-terminal hydrolase [Mecynotus truncatula]                       |
| c47350.graph_c3 | 11.9110197    | 11.0872262    | 9.63189605    | 10.2895192     | 10.8642837     | 10.8589109     | 1.262E-11 | -1.044017 | down      | PREDICTED: uncharacterized protein LOC105166536 [Sesamum indicum]                  |
| c47351.graph_c0 | 1.9138469     | 2.37189745    | 2.75215106    | 1.46930049     | 2.13469126     | 2.20386028     | 0.0025149 | -1.304661 | down      | hypothetical protein MIMGU_mgv1a003544mg [Erythranthe guttata]                     |
| c47352.graph_c0 | 3.93001002    | 4.30699187    | 4.09241842    | 37.9224707     | 43.7783699     | 50.4620327     | 5.923E-35 | 2.400889  | up        | RUBISCO SUBUNIT BINDING-protein ALPHA SUBUNIT [Populus trichocarpa]                |
| c47357.graph_c0 | 33.1769776    | 31.6526021    | 33.1595676    | 23.0729223     | 25.1118907     | 21.2742135     | 8.65E-27  | -1.514471 | down      | hypothetical protein MIMGU_mgv1a004228mg [Erythranthe guttata]                     |
| c47358.graph_c0 | 7.38837045    | 6.65939354    | 6.74057646    | 0.91344637     | 0.43701933     | 0.76034173     | 3.096E-48 | -4.307167 | down      | hypothetical protein MIMGU_mgv1a009769mg [Erythranthe guttata]                     |
| c47359.graph_c0 | 58.4066837    | 63.282334     | 52.6404133    | 30.5363387     | 27.817645      | 24.2919988     | 1.185E-48 | -2.089897 | down      | hypothetical protein VITISV_031499 [Vitis vinifera]                                |
| c47360.graph_c0 | 58.5019996    | 55.7408457    | 61.6685393    | 51.3195381     | 55.721516      | 55.8373599     | 4.107E-15 | -1.130831 | down      | PREDICTED: mitogen-activated protein kinase kinase kinase 1-like [Sesamum indicum] |
| c47360.graph_c1 | 1.3065725     | 0.85012254    | 1.17529817    | 0.30092495     | 0.35067285     | 0.26776121     | 1.397E-08 | -2.876453 | down      | -                                                                                  |
| c47361.graph_c0 | 0             | 0             | 0             | 1.83887816     | 3.15006811     | 1.14883724     | 2.597E-06 | Inf       | up        | -                                                                                  |
| c47362.graph_c2 | 2.3749482     | 1.65092108    | 1.86505151    | 0.79009565     | 0.57946884     | 1.08157286     | 4.972E-06 | -2.280815 | down      | hypothetical protein MIMGU_mgv1a003741mg [Erythranthe guttata]                     |
| c47364.graph_c0 | 11.817542     | 11.5490585    | 13.0268611    | 0.54177465     | 0.54661385     | 1.23960297     | 1.55E-105 | -4.99218  | down      | PREDICTED: pleiotropic drug resistance protein 1-like [Sesamum indicum]            |
| c47367.graph_c4 | 37.5855224    | 36.9899498    | 36.8056015    | 18.1306138     | 19.961755      | 16.6510562     | 7.546E-47 | -2.042532 | down      | PREDICTED: ubiquitin carboxyl-terminal hydrolase 5 [Sesamum indicum]               |
| c47370.graph_c0 | 39.1110723    | 38.2916783    | 35.4586122    | 18.4222076     | 22.7448609     | 18.7021123     | 5.779E-42 | -1.933736 | down      | PREDICTED: hexokinase-3-like [Sesamum indicum]                                     |



| #ID             | 0 h-1<br>FPKM | 0 h-2<br>FPKM | 0 h-3<br>FPKM | 48 h-1<br>FPKM | 48 h-2<br>FPKM | 48 h-3<br>FPKM | FDR       | log2FC    | regulated | nr_annotation                                                                                                |
|-----------------|---------------|---------------|---------------|----------------|----------------|----------------|-----------|-----------|-----------|--------------------------------------------------------------------------------------------------------------|
| c47371.graph_c0 | 0.18052678    | 0.18070755    | 0.27838087    | 4.59023995     | 4.40471253     | 4.67630528     | 4.582E-12 | 3.395706  | up        | PREDICTED: DNA repair protein RAD51 homolog 2 isoform X3 [Sesamum indicum]                                   |
| c47373.graph_c1 | 3.24609284    | 3.05359974    | 3.11595403    | 31.2382445     | 33.2076414     | 35.1051723     | 3.917E-35 | 2.38351   | up        | PREDICTED: acyl-protein amioesterase 2-like [Sesamum indicum]                                                |
| c47377.graph_c0 | 2.7913822     | 3.03270468    | 2.62466096    | 10.1923304     | 11.9935731     | 13.4501347     | 2.331E-05 | 1.056195  | up        | PREDICTED: proline-rich receptor-like protein kinase PERK8 [Sesamum indicum]                                 |
| c47378.graph_c0 | 29.9811228    | 31.1516573    | 30.7756101    | 16.4241517     | 15.6769004     | 14.2112161     | 1.189E-43 | -2.004676 | down      | PREDICTED: E3 ubiquitin protein ligase RIE1-like isoform X2 [Sesamum indicum]                                |
| c47382.graph_c0 | 0             | 0             | 0             | 29.4187655     | 68.7904244     | 25.4984893     | 3.899E-08 | Inf       | up        | ubiquitin/40s ribosomal protein S27a fusion [Wallemia sebi CBS 633.66]                                       |
| c47383.graph_c0 | 6.23280714    | 3.44126882    | 4.59732603    | 0              | 0              | 0              | 5.918E-29 | -Inf      | down      | --                                                                                                           |
| c47385.graph_c0 | 36.6675556    | 38.3904731    | 35.6666626    | 29.9008339     | 31.3513247     | 31.6312595     | 1.334E-19 | -1.2714   | down      | PREDICTED: pentatricopeptide repeat-containing protein At2g26790, mitochondrial isoform X1 [Sesamum indicum] |
| c47389.graph_c0 | 4.23416533    | 2.78842448    | 4.24785297    | 2.73739599     | 1.92120967     | 2.13125368     | 1.131E-06 | -1.743774 | down      | PREDICTED: uncharacterized protein LOC104811210 [Tarenaya hassleriana]                                       |
| c47391.graph_c0 | 4.97260435    | 7.27492997    | 6.38999346    | 4.05250045     | 3.54650104     | 2.19488989     | 5.006E-05 | -1.940518 | down      | -                                                                                                            |
| c47395.graph_c0 | 4.86723221    | 4.33076089    | 3.99598555    | 19.6175515     | 25.5986598     | 23.8282512     | 2.116E-07 | 1.367473  | up        | hypothetical protein MIMGU_mgv1a009112mg [Erythranthe guttata]                                               |
| c47396.graph_c0 | 8.15458655    | 8.95142384    | 9.31463695    | 7.21009994     | 6.77956691     | 6.72766733     | 2.666E-18 | -1.368062 | down      | hypothetical protein MIMGU_mgv1a001351mg [Erythranthe guttata]                                               |
| c47400.graph_c0 | 11.8269707    | 7.08214741    | 6.78487747    | 0              | 0              | 0              | 6.221E-25 | -Inf      | down      | glyceraldehyde-3-phosphate dehydrogenase 3 [Pilobolus crystallinus]                                          |
| c47411.graph_c0 | 23.8290284    | 24.1512061    | 22.0204888    | 10.9821475     | 14.9669825     | 15.4517359     | 3.712E-36 | -1.780109 | down      | PREDICTED: mediator of RNA polymerase II transcription subunit 13 [Sesamum indicum]                          |
| c47412.graph_c0 | 260.870499    | 263.526052    | 267.529967    | 45.724851      | 46.4848294     | 42.1562649     | 7.76E-111 | -3.576429 | down      | PREDICTED: L-type lectin-domain containing receptor kinase IV.1 [Sesamum indicum]                            |
| c47421.graph_c2 | 12.0693212    | 14.9352824    | 12.1308335    | 6.27452721     | 7.69827017     | 6.43996778     | 1.042E-26 | -1.958243 | down      | PREDICTED: transcription factor bHLH48-like isoform X2 [Sesamum indicum]                                     |
| c47422.graph_c1 | 62.361885     | 68.6985011    | 55.5352501    | 381.020037     | 282.132244     | 225.97291      | 0.0023858 | 1.244577  | up        | PREDICTED: aspartate aminotransferase, cytoplasmic [Sesamum indicum]                                         |
| c47423.graph_c0 | 19.045105     | 20.6490619    | 17.1888961    | 12.5074174     | 12.370897      | 12.8073295     | 1.24E-30  | -1.610057 | down      | PREDICTED: mediator of RNA polymerase II transcription subunit 12 isoform X1 [Sesamum indicum]               |
| c47425.graph_c0 | 15.6229509    | 17.2343699    | 17.6178112    | 80.0909995     | 83.6020076     | 86.8154817     | 7.117E-18 | 1.291762  | up        | hypothetical protein MIMGU_mgv1a005589mg [Erythranthe guttata]                                               |
| c47426.graph_c0 | 18.8616889    | 18.1192624    | 17.8713489    | 6.8665668      | 9.05575489     | 10.0108582     | 6.984E-42 | -2.103515 | down      | PREDICTED: sucrose transport protein SUC3 isoform X2 [Sesamum indicum]                                       |
| c47429.graph_c0 | 31.8594916    | 29.723375     | 31.1251361    | 20.1816971     | 17.9108434     | 17.2392506     | 2.239E-35 | -1.759338 | down      | PREDICTED: pentatricopeptide repeat-containing protein At1g03560, mitochondrial [Sesamum indicum]            |

| #ID             | 0 h-1<br>FPKM | 0 h-2<br>FPKM | 0 h-3<br>FPKM | 48 h-1<br>FPKM | 48 h-2<br>FPKM | 48 h-3<br>FPKM | FDR       | log2FC    | regulated | nr_annotation                                                                                                                               |
|-----------------|---------------|---------------|---------------|----------------|----------------|----------------|-----------|-----------|-----------|---------------------------------------------------------------------------------------------------------------------------------------------|
| c47433.graph_c1 | 3.41132882    | 2.59817536    | 2.28714396    | 0.47824283     | 0.43426311     | 0.72949302     | 6.395E-11 | -3.353812 | down      | hypothetical protein VITISV_042890 [Vitis vinifera]                                                                                         |
| c47435.graph_c0 | 21.3837584    | 24.1377461    | 23.0355673    | 2.59873831     | 1.95377609     | 2.23775006     | 7.912E-56 | -4.348954 | down      | PREDICTED: protein 11C0Z, chloroplastic [Sesamum indicum]                                                                                   |
| c47437.graph_c1 | 13.0304915    | 11.5467399    | 13.7937876    | 2.80433895     | 4.27386456     | 4.50902184     | 2.055E-28 | -2.753875 | down      | hypothetical protein MIMGU_mgv1a006304mg [Erythranthe guttata]                                                                              |
| c47438.graph_c0 | 6.17812351    | 6.47089994    | 5.38311966    | 32.9007466     | 34.2366796     | 33.5611252     | 1.332E-23 | 1.465006  | up        | PREDICTED: clustereu mitochondria protein [Sesamum indicum]                                                                                 |
| c47439.graph_c1 | 50.7544499    | 55.6217636    | 50.9926915    | 38.0795829     | 36.3801831     | 34.8571791     | 6.485E-28 | -1.541508 | down      | PREDICTED: long chain base biosynthesis protein 2a [Sesamum indicum]                                                                        |
| c47443.graph_c0 | 25.9543674    | 27.4170585    | 28.53653      | 24.8658212     | 27.7430958     | 25.4589836     | 1.653E-12 | -1.088979 | down      | hypothetical protein MIMGU_mgv1a014801mg [Erythranthe guttata]                                                                              |
| c47445.graph_c0 | 14.4111638    | 13.7780615    | 14.5472782    | 9.81666698     | 10.5749405     | 10.1194188     | 5.464E-23 | -1.504928 | down      | PREDICTED: LOW QUALITY PROTEIN: nuclear pore complex protein NUP88 [Sesamum indicum]                                                        |
| c47448.graph_c0 | 20.6730004    | 23.2276239    | 21.2645471    | 18.7430098     | 17.6598968     | 16.7926991     | 6.149E-15 | -1.308485 | down      | PREDICTED: ADP-ribosylation factor-related protein 1 [Nicotiana tomentosiformis]                                                            |
| c47449.graph_c0 | 1.86459419    | 2.5451745     | 2.55944627    | 0.03904059     | 0.08271753     | 0              | 2.118E-25 | -6.863524 | down      | PREDICTED: E3 ubiquitin-protein ligase CHIP-like [Glycine max]                                                                              |
| c47449.graph_c1 | 9.40506853    | 8.95524305    | 8.35203464    | 5.49460066     | 5.59698379     | 3.88617798     | 4.068E-09 | -1.848741 | down      | hypothetical protein MIMGU_mgv1a013929mg [Erythranthe guttata]                                                                              |
| c47450.graph_c0 | 0             | 0             | 0             | 4.17320055     | 6.38588883     | 4.53846403     | 1.951E-15 | Inf       | up        | -                                                                                                                                           |
| c47451.graph_c0 | 0.57854054    | 0.71073802    | 0.60827523    | 3.14948213     | 3.07984101     | 2.414367       | 0.0053265 | 1.17265   | up        | PREDICTED: uncharacterized protein LOC105174442 [Sesamum indicum]                                                                           |
| c47452.graph_c0 | 15.2717543    | 9.33425657    | 10.1289336    | 0              | 0              | 0              | 6.67E-38  | -Inf      | down      | lectin [Bryopsis maxima]                                                                                                                    |
| c47453.graph_c0 | 45.5899734    | 45.7866362    | 44.5881263    | 9.28401897     | 9.15801174     | 8.53292865     | 4.37E-108 | -3.349884 | down      | PREDICTED: probable plastidic glucose transporter 2-like isoform X2 [Glycine max]                                                           |
| c47456.graph_c0 | 0.48088662    | 0.30632519    | 0.33706819    | 1.75195902     | 2.49598405     | 2.81315595     | 0.0001989 | 1.628669  | up        | PREDICTED: SWI/SNF-related matrix-associated actin-dependent regulator of chromatin subfamily A-like protein 1 isoform X3 [Sesamum indicum] |
| c47458.graph_c0 | 0             | 0             | 0             | 13.6696092     | 19.6249222     | 15.9516538     | 1.178E-31 | Inf       | up        | --                                                                                                                                          |
| c47458.graph_c1 | 0             | 0             | 0             | 9.97705526     | 11.9245418     | 9.52247208     | 9.378E-35 | Inf       | up        | --                                                                                                                                          |
| c47459.graph_c0 | 0             | 0             | 0             | 7.38662458     | 14.7998973     | 5.00087162     | 8.761E-07 | Inf       | up        | -                                                                                                                                           |
| c47462.graph_c0 | 0.51065417    | 0.96852413    | 0.69074824    | 2.59984381     | 3.54113906     | 3.67928895     | 0.0039761 | 1.154519  | up        | PREDICTED: leucine-rich repeat receptor-like serine/threonine-protein kinase BAM3 [Sesamum indicum]                                         |
| c47464.graph_c1 | 0.33200516    | 0             | 0.10665994    | 1.68225644     | 2.99724675     | 2.44941        | 2.125E-06 | 3.004156  | up        | PREDICTED: glutamate synthase 1 [NADH], chloroplastic isoform X1 [Sesamum indicum]                                                          |
| c47466.graph_c0 | 0.29556557    | 0.32544769    | 0.34183211    | 51.0824069     | 27.7501187     | 17.9291501     | 5.077E-06 | 5.648667  | up        | hypothetical protein MIMGU_mgv1a004441mg [Erythranthe guttata]                                                                              |

| #ID             | 0 h-1<br>FPKM | 0 h-2<br>FPKM | 0 h-3<br>FPKM | 48 h-1<br>FPKM | 48 h-2<br>FPKM | 48 h-3<br>FPKM | FDR       | log2FC    | regulated | nr_annotation                                                                                                                                             |
|-----------------|---------------|---------------|---------------|----------------|----------------|----------------|-----------|-----------|-----------|-----------------------------------------------------------------------------------------------------------------------------------------------------------|
| c47467.graph_c0 | 0             | 0             | 0             | 7.32517328     | 12.3565193     | 8.37298837     | 3.379E-20 | Inf       | up        | Protein bli-3 OS=Neurospora crassa (strain ATCC 24698 / 74-OR23-1A / CBS 708,71 / DSM 1257 / FGSC 987)<br>GN=bli-3 PE=2 SV=1 [Rhizoctonia solani AG-1 IB] |
| c47468.graph_c0 | 80.0914389    | 73.4736252    | 75.0244425    | 28.09306       | 35.6436371     | 35.8416461     | 1.039E-52 | -2.220346 | down      | hypothetical protein MIMGU_mgv1a012537mg<br>[Erythranthe guttata]                                                                                         |
| c47468.graph_c1 | 17.1266498    | 2.60112821    | 2.42851565    | 42781.5201     | 38273.9501     | 43600.1741     | 3.64E-229 | 11.45583  | up        | PREDICTED: non-specific lipid-transfer protein 1-like<br>[Sesamum indicum]                                                                                |
| c47468.graph_c2 | 16.1569824    | 19.8251653    | 18.52985      | 15.5250753     | 9.49513762     | 5.83895738     | 3.087E-08 | -1.824868 | down      | PREDICTED: zinc finger protein ZAT11-like [Nicotiana tomentosiformis]                                                                                     |
| c47468.graph_c3 | 63.8762735    | 63.5020891    | 82.5335188    | 2.06999461     | 2.19290829     | 2.72692257     | 2.318E-53 | -5.931535 | down      | PREDICTED: LOW QUALITY PROTEIN: small heat shock protein, chloroplastic-like [Sesamum indicum]                                                            |
| c47469.graph_c0 | 89.663122     | 81.4182633    | 95.4183581    | 69.4087065     | 84.4459182     | 79.8925334     | 4.992E-17 | -1.210962 | down      | hypothetical protein MIMGU_mgv1a011464mg<br>[Erythranthe guttata]                                                                                         |
| c47471.graph_c2 | 12.6595489    | 13.0119973    | 11.0661319    | 38.4513439     | 59.1018862     | 85.750849      | 0.0096681 | 1.293051  | up        | PREDICTED: probable E3 ubiquitin-protein ligase ARI2 isoform X1 [Sesamum indicum]                                                                         |
| c47474.graph_c0 | 95.7833967    | 93.7327576    | 89.6997632    | 45.3873442     | 40.2475343     | 34.1878518     | 1.284E-54 | -2.233594 | down      | PREDICTED: ankyrin repeat domain-containing protein 6<br>[Sesamum indicum]                                                                                |
| c47475.graph_c0 | 462.409017    | 271.598512    | 313.741882    | 0              | 0              | 0              | 1.09E-60  | -Inf      | down      | --                                                                                                                                                        |
| c47476.graph_c0 | 30.2165419    | 29.5019636    | 26.8563452    | 6.85504639     | 9.40914325     | 7.34601477     | 1.412E-74 | -2.895043 | down      | PREDICTED: uncharacterized protein LOC105163261<br>[Sesamum indicum]                                                                                      |
| c47476.graph_c1 | 27.4282689    | 24.2658563    | 22.7419792    | 17.4574285     | 22.8259633     | 24.303187      | 4.643E-13 | -1.225992 | down      | PREDICTED: protein YIPF1 homolog [Sesamum indicum]                                                                                                        |
| c47482.graph_c3 | 41.7415311    | 41.750762     | 41.2643853    | 10.3405941     | 11.1451205     | 12.4546849     | 1.556E-81 | -2.897609 | down      | PREDICTED: YTH domain-containing family protein 2-like isoform X2 [Sesamum indicum]                                                                       |
| c47487.graph_c0 | 0.28142601    | 0.42256172    | 0.18082178    | 27.5256187     | 40.1007983     | 46.3697156     | 3.929E-29 | 5.989864  | up        | PREDICTED: vinorine synthase-like [Sesamum indicum]                                                                                                       |
| c47489.graph_c0 | 10.3287823    | 9.24098151    | 7.92649796    | 7.26537832     | 7.63618274     | 5.41269315     | 2.887E-16 | -1.450265 | down      | PREDICTED: uncharacterized protein LOC105164519<br>[Sesamum indicum]                                                                                      |
| c47492.graph_c0 | 13.5790167    | 12.7012951    | 16.5198836    | 139.915784     | 159.466874     | 156.794987     | 7.274E-60 | 2.391642  | up        | PREDICTED: uncharacterized protein LOC105161817<br>[Sesamum indicum]                                                                                      |
| c47495.graph_c2 | 72.8984159    | 76.5802252    | 74.4589671    | 54.6333543     | 59.2937858     | 58.0919792     | 2.831E-21 | -1.399394 | down      | PREDICTED: uncharacterized protein LOC105175572 isoform X2 [Sesamum indicum]                                                                              |
| c47495.graph_c3 | 0             | 0             | 0.16423398    | 168.547586     | 168.389965     | 188.893223     | 7.85E-258 | 10.5939   | up        | hypothetical protein M569_11087, partial [Genlisea aurea]                                                                                                 |
| c47497.graph_c0 | 0             | 0             | 0             | 30.3298467     | 42.6416666     | 21.4606576     | 2.988E-19 | Inf       | up        | alpha-tubulin, partial [Syntrichia caninervis]                                                                                                            |
| c47498.graph_c0 | 93.9221566    | 89.3994331    | 82.4562682    | 38.8089938     | 37.8981957     | 33.3472582     | 7.744E-56 | -2.286756 | down      | hypothetical protein MIMGU_mgv1a005594mg<br>[Erythranthe guttata]                                                                                         |
| c47500.graph_c0 | 4.81071851    | 3.5400695     | 3.27476998    | 59.0047952     | 60.7065182     | 58.3001527     | 1.602E-76 | 2.922006  | up        | hypothetical protein MIMGU_mgv1a001160mg<br>[Erythranthe guttata]                                                                                         |

| #ID             | 0 h-1<br>FPKM | 0 h-2<br>FPKM | 0 h-3<br>FPKM | 48 h-1<br>FPKM | 48 h-2<br>FPKM | 48 h-3<br>FPKM | FDR       | log2FC    | regulated | nr_annotation                                                                                              |
|-----------------|---------------|---------------|---------------|----------------|----------------|----------------|-----------|-----------|-----------|------------------------------------------------------------------------------------------------------------|
| c47502.graph_c0 | 898.215909    | 944.828922    | 878.431335    | 342.399151     | 291.316442     | 245.708644     | 5.42E-46  | -2.642153 | down      | PREDICTED: probable inactive receptor kinase At1g27190 [Sesamum indicum]                                   |
| c47503.graph_c0 | 1.68796457    | 1.72037581    | 1.18314617    | 12.2708612     | 14.2575047     | 15.5727543     | 4.996E-18 | 2.179626  | up        | PREDICTED: pentatricopeptide repeat-containing protein At1g80270, mitochondrial [Sesamum indicum]          |
| c47506.graph_c0 | 9.98219732    | 9.61448122    | 8.90432574    | 207.595102     | 226.885416     | 236.484838     | 5.63E-123 | 3.538822  | up        | -                                                                                                          |
| c47507.graph_c0 | 43.7112974    | 41.0298385    | 40.2718994    | 39.517254      | 40.210446      | 43.5436175     | 1.986E-13 | -1.03796  | down      | Fas-associated factor 1-like protein [Capsicum annuum]                                                     |
| c47508.graph_c0 | 5.72549101    | 6.22959155    | 6.20587665    | 25.9606765     | 31.8753285     | 31.0172031     | 1.136E-10 | 1.268971  | up        | PREDICTED: probable serine/threonine-protein kinase At5g41260 [Sesamum indicum]                            |
| c47509.graph_c0 | 0             | 0             | 0             | 5.11982505     | 8.73329176     | 3.8606691      | 2.429E-08 | Inf       | up        | Peptidyl-prolyl cis-trans isomerase,FKBP-type,N-terminal [Ostreococcus tauri]                              |
| c47511.graph_c1 | 63.0128752    | 64.7325457    | 65.0141737    | 47.3066576     | 50.9616963     | 47.2869972     | 1.542E-22 | -1.423759 | down      | hypothetical protein MIMGU_mgv1a002091mg [Erythranthe guttata]                                             |
| c47512.graph_c1 | 3.81854803    | 2.31229895    | 2.48378273    | 19.2398483     | 22.3607024     | 30.8769335     | 4.039E-08 | 2.053055  | up        | PREDICTED: glycosyltransferase family protein 64 protein C5 [Sesamum indicum]                              |
| c47517.graph_c0 | 113.42782     | 115.788633    | 121.05734     | 29.3946585     | 32.454697      | 30.4568795     | 5.946E-87 | -2.943459 | down      | PREDICTED: calcium and calcium/calmodulin-dependent serine/threonine-protein kinase-like [Sesamum indicum] |
| c47522.graph_c1 | 8.09712044    | 8.69990557    | 8.79345768    | 1.17569711     | 0.88044569     | 0.93790806     | 1.747E-77 | -4.108185 | down      | PREDICTED: ABC transporter C family member 4-like [Sesamum indicum]                                        |
| c47524.graph_c0 | 63.113418     | 67.9381945    | 60.760191     | 61.0540365     | 54.0944422     | 49.537133      | 3.392E-18 | -1.233594 | down      | PREDICTED: histone-lysine N-methyltransferase ASHH2 [Sesamum indicum]                                      |
| c47525.graph_c0 | 0             | 0             | 0             | 1.47786726     | 1.74528261     | 1.37966941     | 4.052E-14 | Inf       | up        | glycoside hydrolase family 13 protein [Serpula lacrymans var. lacrymans S7.9]                              |
| c47528.graph_c0 | 0             | 0             | 0             | 5.62926879     | 4.813932       | 5.91411051     | 5.464E-16 | Inf       | up        | expressed unknown protein [Ectocarpus siliculosus]                                                         |
| c47533.graph_c1 | 1.72960211    | 2.17909285    | 1.83939905    | 13.2693614     | 13.358781      | 13.4448217     | 1.187E-13 | 1.784164  | up        | PREDICTED: riboflavin biosynthesis protein PYRR, chloroplastic [Sesamum indicum]                           |
| c47533.graph_c2 | 23.9202255    | 23.2670932    | 24.17985      | 0.96305096     | 0.66015252     | 0.90732383     | 1.57E-113 | -5.830704 | down      | hypothetical protein MIMGU_mgv1a0267602mg, partial [Erythranthe guttata]                                   |
| c47533.graph_c4 | 17.9144635    | 18.9130803    | 18.2547709    | 88.8377879     | 104.289074     | 103.59904      | 9.882E-20 | 1.409084  | up        | Pectinesterase 1 [Morus notabilis]                                                                         |
| c47536.graph_c0 | 83.8487191    | 81.7977941    | 83.7426868    | 72.4439925     | 75.2037749     | 67.7301852     | 2.514E-18 | -1.228962 | down      | hypothetical protein MIMGU_mgv1a006250mg [Erythranthe guttata]                                             |
| c47545.graph_c0 | 0             | 0             | 0             | 2.05299016     | 6.84556843     | 2.27593624     | 8.748E-05 | Inf       | up        | PREDICTED: KDEL-tailed cysteine endopeptidase CEP1-like [Glycine max]                                      |
| c47547.graph_c0 | 4.81950626    | 3.17027549    | 5.83935599    | 0              | 0              | 0              | 4.69E-17  | -Inf      | down      | PREDICTED: uncharacterized protein LOC101507298 [Cicer arietinum]                                          |
| c47550.graph_c0 | 15.6573649    | 18.6497067    | 20.7442202    | 1.1740942      | 0.71074882     | 0.99495424     | 1.033E-51 | -5.269496 | down      | PREDICTED: uncharacterized protein LOC105155796 [Sesamum indicum]                                          |
| c47550.graph_c1 | 0.04791609    | 0.14389221    | 0.12314814    | 5.25306784     | 6.40675136     | 9.50541057     | 7.484E-13 | 5.042111  | up        | -                                                                                                          |

| #ID             | 0 h-1<br>FPKM | 0 h-2<br>FPKM | 0 h-3<br>FPKM | 48 h-1<br>FPKM | 48 h-2<br>FPKM | 48 h-3<br>FPKM | FDR       | log2FC    | regulated | nr_annotation                                                                                             |
|-----------------|---------------|---------------|---------------|----------------|----------------|----------------|-----------|-----------|-----------|-----------------------------------------------------------------------------------------------------------|
| c47550.graph_c2 | 5.16204908    | 4.92827159    | 6.32668889    | 1.12705358     | 2.67916701     | 3.49772941     | 7.569E-13 | -2.203404 | down      | PREDICTED: chloride channel protein CLC-a-like [Sesamum indicum]                                          |
| c47550.graph_c6 | 8.5943049     | 8.39807959    | 10.6934182    | 1.00541387     | 2.39650669     | 3.74618447     | 6.208E-19 | -2.989305 | down      | PREDICTED: chloride channel protein CLC-b-like [Sesamum indicum]                                          |
| c47550.graph_c7 | 0.92628527    | 0.52983589    | 0.680179      | 10.2402529     | 10.7191598     | 12.148954      | 3.81E-08  | 2.936365  | up        | hypothetical protein MIMGU_mgv1a002946mg [Erythranthe guttata]                                            |
| c47553.graph_c1 | 20.9018075    | 18.0081273    | 16.1692421    | 17.9148869     | 16.9488482     | 15.855315      | 1.281E-10 | -1.132575 | down      | PREDICTED: mediator of RNA polymerase II transcription subunit 8 [Sesamum indicum]                        |
| c47554.graph_c4 | 17.1231238    | 17.733467     | 15.9117397    | 6.75247822     | 8.64499855     | 7.36338119     | 1.072E-37 | -2.177398 | down      | PREDICTED: zinc finger protein JACKDAW [Sesamum indicum]                                                  |
| c47554.graph_c5 | 394.290269    | 392.242733    | 369.627339    | 141.012543     | 139.066807     | 157.473502     | 2.041E-56 | -2.419268 | down      | hypothetical protein POPTR_0003s102801g, partial [Populus trichocarpa]                                    |
| c47555.graph_c0 | 0             | 0             | 0             | 1.07615334     | 0.83603958     | 1.19694346     | 1.281E-13 | Inf       | up        | PREDICTED: kinesin-4 [Sesamum indicum]                                                                    |
| c47556.graph_c0 | 55.1822147    | 28.1452627    | 38.8353215    | 0              | 0              | 0              | 5.904E-29 | -Inf      | down      | mannose-binding lectin precursor [Dendrobium catenatum]                                                   |
| c47557.graph_c0 | 37.320859     | 36.4957381    | 31.3503644    | 169.371923     | 184.186238     | 186.505884     | 7.484E-21 | 1.343109  | up        | PREDICTED: pentatricopeptide repeat-containing protein At5g16860 [Sesamum indicum]                        |
| c47558.graph_c0 | 104.06505     | 91.3569944    | 109.651955    | 527.122423     | 501.032157     | 501.495261     | 3.622E-21 | 1.308457  | up        | PREDICTED: NADH dehydrogenase [ubiquinone] 1 beta subcomplex subunit 2-like [Fragaria vesca subsp. vesca] |
| c47560.graph_c0 | 35.6117574    | 33.2993837    | 33.3399583    | 7.46526467     | 8.18603543     | 10.6630369     | 1.16E-78  | -2.978935 | down      | PREDICTED: CBL-interacting serine/threonine-protein kinase 24 [Sesamum indicum]                           |
| c47563.graph_c2 | 1.28905493    | 1.34195955    | 1.25892983    | 0.52252705     | 0.90581572     | 0.67627844     | 0.0001215 | -1.911275 | down      | -                                                                                                         |
| c47564.graph_c1 | 22.487663     | 22.9157699    | 20.2319953    | 154.111775     | 164.618554     | 157.815513     | 7.605E-39 | 1.842907  | up        | PREDICTED: pentatricopeptide repeat-containing protein At5g62370 [Sesamum indicum]                        |
| c47564.graph_c2 | 17.6401378    | 18.6787521    | 17.5746156    | 13.4964351     | 13.800127      | 14.6312754     | 8.888E-20 | -1.380236 | down      | PREDICTED: uncharacterized protein LOC105170859 [Sesamum indicum]                                         |
| c47564.graph_c3 | 63.1922398    | 59.5292584    | 52.3862557    | 60.3079342     | 58.3064145     | 48.8239029     | 8.765E-13 | -1.078233 | down      | PREDICTED: uncharacterized protein LOC105179697 [Sesamum indicum]                                         |
| c47564.graph_c4 | 0             | 0             | 0             | 3.6343975      | 4.98551986     | 2.86072676     | 6.457E-15 | Inf       | up        | PREDICTED: probable pectinesterase/pectinesterase inhibitor 59 [Sesamum indicum]                          |
| c47564.graph_c8 | 0.92208555    | 0.57688055    | 1.03680189    | 12.1051663     | 7.53688635     | 9.1648869      | 7.718E-07 | 2.493336  | up        | PREDICTED: probable transcription factor KAN2 isoform X2 [Sesamum indicum]                                |
| c47564.graph_c9 | 3.18029712    | 1.91008903    | 1.86825496    | 0.75340212     | 1.33023032     | 1.86214633     | 0.0001869 | -1.843541 | down      | -                                                                                                         |
| c47565.graph_c0 | 0.31190328    | 0.43229853    | 0.83244753    | 2.27666168     | 2.20110308     | 3.30415203     | 0.0017932 | 1.273207  | up        | PREDICTED: uncharacterized protein LOC105160289 [Sesamum indicum]                                         |
| c47568.graph_c0 | 1.42892391    | 1.04296702    | 0.68858393    | 9.73600747     | 9.76209607     | 10.3224403     | 5.258E-14 | 2.226465  | up        | PREDICTED: D-2-hydroxyglutarate dehydrogenase, mitochondrial isoform X1 [Sesamum indicum]                 |
| c47569.graph_c0 | 2.02096065    | 1.99233305    | 1.84938907    | 8.85784848     | 11.2067871     | 9.83952498     | 6.311E-07 | 1.330691  | up        | hypothetical protein JCGZ_11229 [Jatropha curcas]                                                         |

| #ID             | 0 h-1<br>FPKM | 0 h-2<br>FPKM | 0 h-3<br>FPKM | 48 h-1<br>FPKM | 48 h-2<br>FPKM | 48 h-3<br>FPKM | FDR       | log2FC    | regulated | nr_annotation                                                                                             |
|-----------------|---------------|---------------|---------------|----------------|----------------|----------------|-----------|-----------|-----------|-----------------------------------------------------------------------------------------------------------|
| c47574.graph_c1 | 947.355017    | 933.596707    | 956.402819    | 322.955621     | 133.832145     | 103.255117     | 2.856E-83 | -3.337734 | down      | PREDICTED: NAC domain-containing protein 2 [Sesamum indicum]                                              |
| c47575.graph_c0 | 0.01750384    | 0.07008547    | 0.11246563    | 6.04712949     | 7.73869013     | 5.36635092     | 8.332E-35 | 5.548842  | up        | PREDICTED: uncharacterized protein At5g05190 [Sesamum indicum]                                            |
| c47575.graph_c1 | 109.836365    | 114.841146    | 108.062994    | 87.2091083     | 99.813571      | 95.6810053     | 2.114E-17 | -1.254427 | down      | PREDICTED: protein STICHEL-like 4 [Sesamum indicum]                                                       |
| c47580.graph_c0 | 40.5618678    | 39.8265258    | 38.6409666    | 13.2200523     | 15.0606989     | 14.0684587     | 4.806E-68 | -2.509853 | down      | PREDICTED: two-component response regulator ARR2-like isoform X1 [Sesamum indicum]                        |
| c47580.graph_c1 | 388.161765    | 366.175821    | 396.904401    | 82.7535734     | 85.9376349     | 66.6086963     | 7.937E-82 | -3.307379 | down      | PREDICTED: probable copper-transporting ATPase HMA5 [Nicotiana tomentosiformis]                           |
| c47585.graph_c1 | 251.066046    | 270.32407     | 300.990548    | 317.293165     | 245.167892     | 254.149801     | 2.723E-08 | -1.024412 | down      | Mitochondrial protein, putative [Medicago truncatula]                                                     |
| c47585.graph_c2 | 217.199107    | 229.446516    | 276.854933    | 242.283423     | 153.933454     | 168.69785      | 2.048E-07 | -1.368409 | down      | unnamed protein product [Triticum aestivum]                                                               |
| c47586.graph_c0 | 0             | 0             | 0             | 35.4568966     | 72.2118195     | 32.8235391     | 2.276E-14 | Inf       | up        | 60S ribosomal protein L8 [Rozella allomyces CSF55]                                                        |
| c47588.graph_c0 | 2.91550826    | 3.14292213    | 4.13080441    | 14.5317127     | 14.2272254     | 14.0332834     | 0.0010344 | 1.049761  | up        | PREDICTED: uncharacterized protein LOC101244714 [Solanum lycopersicum]                                    |
| c47591.graph_c0 | 3.65889165    | 2.95934483    | 3.27246716    | 13.564138      | 14.0553146     | 14.6367116     | 3.568E-07 | 1.077063  | up        | PREDICTED: uncharacterized protein LOC100250241 isoform X4 [Vitis vinifera]                               |
| c47593.graph_c0 | 1.28051448    | 1.6022459     | 1.09700787    | 11.7477807     | 11.4038974     | 12.7274203     | 7.426E-10 | 2.157129  | up        | PREDICTED: beta-galactosidase-like [Sesamum indicum]                                                      |
| c47593.graph_c2 | 4.35404072    | 4.03264388    | 4.29727882    | 24.9667823     | 34.7290525     | 47.0982603     | 3.57E-06  | 2.048152  | up        | PREDICTED: pentatricopeptide repeat-containing protein At3g09060 [Sesamum indicum]                        |
| c47596.graph_c5 | 0.42355031    | 0.35613852    | 0.37010967    | 6.49296417     | 13.4924584     | 15.4434359     | 6.979E-08 | 3.91606   | up        | PREDICTED: probably inactive leucine-rich repeat receptor-like protein kinase At3g28040 [Sesamum indicum] |
| c47598.graph_c0 | 211.556645    | 225.315966    | 237.99075     | 24.0617012     | 24.0228226     | 20.1123839     | 7.95E-172 | -4.32391  | down      | PREDICTED: B2 protein [Sesamum indicum]                                                                   |
| c47598.graph_c1 | 162.165233    | 168.562163    | 161.354457    | 68.7184844     | 69.4701249     | 70.2513348     | 9.475E-45 | -2.256772 | down      | transferase, transferring glycosyl groups, putative [Ricinus communis]                                    |
| c47600.graph_c1 | 4.05812334    | 4.49302495    | 3.79261757    | 22.3183563     | 23.6735969     | 29.4604901     | 4.159E-16 | 1.592653  | up        | PREDICTED: protein TIC 62, chloroplastic [Sesamum indicum]                                                |
| c47601.graph_c0 | 12.819353     | 12.8195347    | 11.5346125    | 8.1994645      | 8.84673954     | 8.4358083      | 1.386E-26 | -1.562179 | down      | PREDICTED: LOW QUALITY PROTEIN: mediator of RNA polymerase II transcription subunit 16 [Sesamum indicum]  |
| c47604.graph_c0 | 0             | 0             | 0.11054       | 21.0006878     | 27.2848933     | 22.8466286     | 7.855E-40 | 8.276252  | up        | large subunit ribosomal protein L19e, cytoplasmic [Guillardia theta CCMP2712]                             |
| c47605.graph_c0 | 8.30276232    | 7.17540126    | 8.18427466    | 34.2544243     | 38.8552728     | 39.1243646     | 6.73E-16  | 1.225591  | up        | PREDICTED: arginine--tRNA ligase, cytoplasmic-like isoform X1 [Sesamum indicum]                           |
| c47606.graph_c0 | 118.684614    | 114.426685    | 118.706984    | 104.902231     | 99.3779757     | 84.5934678     | 7.687E-20 | -1.299646 | down      | -                                                                                                         |
| c47606.graph_c1 | 0.03360826    | 0.13456765    | 0.04318794    | 84.2788939     | 116.409376     | 120.613503     | 3.402E-93 | 9.550514  | up        | PREDICTED: serine carboxypeptidase-like 27 [Sesamum indicum]                                              |
| c47608.graph_c1 | 46.6197267    | 47.5679916    | 40.9005878    | 38.0990948     | 46.5022424     | 47.8140456     | 2.006E-13 | -1.048705 | down      | PREDICTED: transcription elongation factor SPT6 [Sesamum indicum]                                         |

| #ID             | 0 h-1<br>FPKM | 0 h-2<br>FPKM | 0 h-3<br>FPKM | 48 h-1<br>FPKM | 48 h-2<br>FPKM | 48 h-3<br>FPKM | FDR       | log2FC    | regulated | nr_annotation                                                                                     |
|-----------------|---------------|---------------|---------------|----------------|----------------|----------------|-----------|-----------|-----------|---------------------------------------------------------------------------------------------------|
| c47609.graph_c2 | 0.47972746    | 0             | 0             | 3.38833108     | 3.90165861     | 5.11224992     | 8.303E-08 | 3.691446  | up        | -                                                                                                 |
| c47610.graph_c0 | 0.08159668    | 0.5717487     | 0.10485496    | 68.1341873     | 35.3981187     | 28.2266332     | 5.839E-08 | 6.445875  | up        | PREDICTED: uncharacterized protein LOC105174809 [Sesamum indicum]                                 |
| c47615.graph_c0 | 0.42646644    | 0.18973044    | 0.24356723    | 12.9653272     | 9.61925908     | 10.6042302     | 1.29E-22  | 4.262142  | up        | PREDICTED: vinorine synthase-like [Sesamum indicum]                                               |
| c47616.graph_c0 | 1.35021542    | 1.19440845    | 1.0087676     | 7.46343908     | 7.5082137      | 7.46460361     | 3.488E-07 | 1.643722  | up        | PREDICTED: OPG0505 protein isoform A2 [Sesamum indicum]                                           |
| c47617.graph_c1 | 0.2719415     | 0             | 0.06989112    | 15.3324513     | 16.986011      | 15.782758      | 3.739E-37 | 6.127962  | up        | PREDICTED: transcription factor UNE12-like [Sesamum indicum]                                      |
| c47617.graph_c3 | 5.23907807    | 3.74594586    | 4.56842972    | 0              | 0.18261345     | 0.61352318     | 8.473E-15 | -5.132765 | down      | -                                                                                                 |
| c47618.graph_c0 | 4.49150342    | 1.38847089    | 1.78245521    | 0.24340388     | 0.64464223     | 0.70388275     | 0.007366  | -3.293167 | down      | HSP70 [Dendrobium catenatum]                                                                      |
| c47622.graph_c0 | 11.8354658    | 14.8091466    | 11.5588721    | 3.1620449      | 4.27388678     | 3.88078419     | 6.144E-15 | -2.776437 | down      | -                                                                                                 |
| c47622.graph_c1 | 2339.59651    | 2200.16903    | 2471.13004    | 94.8618542     | 96.2966901     | 89.4384185     | 5.95E-154 | -5.661017 | down      | PREDICTED: probable glycosyltransferase At5g03795 [Sesamum indicum]                               |
| c47626.graph_c0 | 1.64031481    | 2.12846322    | 2.10786948    | 8.58192467     | 9.38797082     | 10.5744008     | 6.042E-09 | 1.258469  | up        | PREDICTED: serine/threonine-protein kinase HT1-like [Sesamum indicum]                             |
| c47627.graph_c0 | 3.14274081    | 2.78567163    | 2.15800187    | 2.12174496     | 2.36480086     | 2.16323698     | 1.372E-05 | -1.297545 | down      | PREDICTED: pentatricopeptide repeat-containing protein At1g63330-like [Sesamum indicum]           |
| c47628.graph_c0 | 2.56348723    | 1.65271286    | 2.40084493    | 10.4072784     | 12.8486562     | 10.6493838     | 4.939E-06 | 1.336358  | up        | -                                                                                                 |
| c47631.graph_c0 | 2.54274883    | 1.05536622    | 0.9563511     | 0.51421743     | 0.54475102     | 0.5083862      | 0.0080555 | -2.549318 | down      | hyponeurcal protein EUGR50Z_H05284 [Eucalyptus grandis]                                           |
| c47633.graph_c0 | 205.02863     | 213.141217    | 183.744597    | 177.19282      | 188.320675     | 198.118174     | 1.475E-15 | -1.112457 | down      | -                                                                                                 |
| c47633.graph_c1 | 23.3385939    | 25.169735     | 24.3007573    | 17.8055446     | 20.2864242     | 18.9606748     | 6.094E-22 | -1.371371 | down      | PREDICTED: adenine nucleotide transporter BT1, chloroplastic/mitochondrial-like [Sesamum indicum] |
| c47636.graph_c0 | 2.8274006     | 3.29420424    | 3.45463376    | 13.7925546     | 18.1400223     | 17.933855      | 6.972E-08 | 1.356557  | up        | UbiA prenyltransferase family protein isoform 1 [Theobroma cacao]                                 |
| c47636.graph_c1 | 2.8935163     | 2.70954831    | 3.718283      | 21.4115577     | 22.0452759     | 21.8063633     | 2.942E-08 | 1.786637  | up        | PREDICTED: chlorophyll synthase, chloroplastic [Sesamum indicum]                                  |
| c47637.graph_c0 | 3.68997875    | 3.56175678    | 2.54023327    | 0.72845338     | 0.90032603     | 0.32408672     | 4.373E-10 | -3.337971 | down      | hypothetical protein VITISV_006175 [Vitis vinifera]                                               |
| c47639.graph_c0 | 0             | 0             | 0             | 4.71725023     | 12.9395789     | 5.62149226     | 3.363E-06 | Inf       | up        | PREDICTED: cytochrome b5 [Phoenix dactylifera]                                                    |
| c47647.graph_c0 | 18.3206339    | 19.3931524    | 17.84955      | 10.6387627     | 10.986945      | 12.5622063     | 2.857E-31 | -1.719224 | down      | zeaxanthin epoxidase [Scutellaria baicalensis]                                                    |
| c47647.graph_c1 | 12.3028679    | 15.8636311    | 17.149475     | 4.41841864     | 5.90185152     | 7.52109664     | 7.161E-09 | -2.371767 | down      | zeaxanthin epoxidase [Scutellaria baicalensis]                                                    |
| c47648.graph_c1 | 6.96330141    | 6.86739183    | 6.04245607    | 207.506664     | 218.599358     | 199.171646     | 6.76E-146 | 3.959346  | up        | PREDICTED: ATP-citrate synthase beta chain protein 2 [Sesamum indicum]                            |
| c47650.graph_c0 | 8.6783183     | 8.56881773    | 9.7485018     | 7.45115307     | 8.03763685     | 7.76725246     | 2.186E-10 | -1.235079 | down      | PREDICTED: uncharacterized protein LOC105179099 isoform X1 [Sesamum indicum]                      |
| c47652.graph_c0 | 18.1838584    | 17.5773468    | 16.1126431    | 10.9503175     | 11.7389648     | 10.8597302     | 5.705E-25 | -1.645735 | down      | PREDICTED: E3 ubiquitin-protein ligase SDIR1 [Sesamum indicum]                                    |

| #ID             | 0 h-1<br>FPKM | 0 h-2<br>FPKM | 0 h-3<br>FPKM | 48 h-1<br>FPKM | 48 h-2<br>FPKM | 48 h-3<br>FPKM | FDR       | log2FC    | regulated | nr_annotation                                                                                                  |
|-----------------|---------------|---------------|---------------|----------------|----------------|----------------|-----------|-----------|-----------|----------------------------------------------------------------------------------------------------------------|
| c47652.graph_c1 | 2.82717454    | 2.83000552    | 2.69113423    | 43.650791      | 47.8267249     | 49.7841383     | 6.388E-52 | 3.061821  | up        | PREDICTED: auxin-responsive protein IAA9-like [Sesamum indicum]                                                |
| c47652.graph_c5 | 0.34374291    | 2.06452271    | 0.44172325    | 38.001407      | 36.2320945     | 30.9956382     | 8.681E-13 | 4.197073  | up        | AUX/IAA8A [Malus domestica]                                                                                    |
| c47657.graph_c0 | 3.12529107    | 3.24547033    | 3.29212785    | 26.1480364     | 22.5755305     | 20.4517453     | 5.854E-15 | 1.825612  | up        | PREDICTED: uncharacterized protein LOC105164082 isoform X2 [Sesamum indicum]                                   |
| c47658.graph_c0 | 0.66328963    | 0.86515194    | 1.08481346    | 3.98118543     | 4.47259988     | 3.80605791     | 0.0001411 | 1.207155  | up        | PREDICTED: dihydrolipoyl dehydrogenase 2, chloroplastic [Sesamum indicum]                                      |
| c47660.graph_c0 | 0.19599722    | 0.13079566    | 0.16790946    | 94.1147132     | 117.322801     | 139.422412     | 9.273E-83 | 8.447705  | up        | PREDICTED: beta-galactosidase-like [Sesamum indicum]                                                           |
| c47661.graph_c1 | 6.8209654     | 6.23407421    | 4.14442023    | 28.9606666     | 34.8047909     | 31.5123597     | 1.193E-15 | 1.454309  | up        | hypothetical protein MIMGU_mgv1a014073mg [Erythranthe guttata]                                                 |
| c47663.graph_c2 | 43.9531541    | 43.9558547    | 45.1322003    | 19.6189074     | 11.1169449     | 8.32242117     | 8.161E-74 | -2.771611 | down      | PREDICTED: zinc finger protein ZAF10-nke [Sesamum indicum]                                                     |
| c47664.graph_c0 | 5.37810993    | 5.99008632    | 6.18104009    | 3.52409318     | 5.65546989     | 6.14724703     | 5.458E-06 | -1.222728 | down      | PREDICTED: cytochrome P450 704C1-nke [Sesamum indicum]                                                         |
| c47671.graph_c2 | 16.5305629    | 14.6853915    | 14.8928859    | 9.96088705     | 11.2431992     | 9.8871199      | 6.965E-28 | -1.586638 | down      | PREDICTED: pentatricopeptide repeat-containing protein At1g77360, mitochondrial-like [Sesamum indicum]         |
| c47676.graph_c1 | 83.2216796    | 79.775591     | 89.024426     | 23.5541223     | 20.7507164     | 21.3504678     | 5.86E-86  | -2.956621 | down      | PREDICTED: BI1-like protein-like [Solanum tuberosum]                                                           |
| c47677.graph_c0 | 17.8458459    | 20.1039538    | 19.4964608    | 17.8599106     | 12.0840997     | 10.8882758     | 1.518E-16 | -1.501512 | down      | UDP-galactose/UDP-glucose transporter 4 [Morus notabilis]                                                      |
| c47678.graph_c2 | 38.7139371    | 41.7304083    | 38.3629327    | 12.9195558     | 15.9470825     | 14.770288      | 2.262E-65 | -2.465438 | down      | hypothetical protein MIMGU_mgv1a024577mg, partial [Erythranthe guttata]                                        |
| c47679.graph_c0 | 0.32395783    | 0.59867487    | 0.28820675    | 9.13719459     | 9.04740427     | 8.33449771     | 4.107E-26 | 3.439977  | up        | PREDICTED: outer envelope protein 80, chloroplastic isoform X1 [Sesamum indicum]                               |
| c47680.graph_c0 | 2.0719942     | 1.58024304    | 1.85958986    | 7.26173338     | 8.15300362     | 7.40505157     | 1.418E-08 | 1.030983  | up        | PREDICTED: pentatricopeptide repeat-containing protein At5g21222-like [Sesamum indicum]                        |
| c47681.graph_c0 | 0             | 0             | 0             | 1.54531963     | 6.10183906     | 1.75002051     | 0.0029812 | Inf       | up        | -                                                                                                              |
| c47682.graph_c0 | 9.26123854    | 8.96854118    | 10.5830257    | 67.283746      | 60.7093089     | 64.6660796     | 3.677E-32 | 1.72374   | up        | PREDICTED: probable tRNA N6-adenosine threonylcarbamoyltransferase, mitochondrial isoform X1 [Sesamum indicum] |
| c47685.graph_c0 | 0             | 0             | 0             | 2.14228201     | 4.08507844     | 2.85928447     | 2.156E-10 | Inf       | up        | -                                                                                                              |
| c47687.graph_c0 | 7.05108117    | 6.92240827    | 6.85377166    | 28.6486547     | 27.6147669     | 29.7152664     | 4.25E-08  | 1.028462  | up        | DUF250 domain-containing protein [Kozella anomycis CBS551]                                                     |
| c47689.graph_c0 | 0.98137459    | 0.80139674    | 0.49780469    | 10.992029      | 13.5603039     | 12.5115996     | 1.184E-28 | 3.007801  | up        | PREDICTED: major facilitator superfamily domain-containing protein 12-like [Sesamum indicum]                   |
| c47694.graph_c0 | 28.3421579    | 28.2006548    | 28.8603904    | 26.6665597     | 23.1705101     | 21.2081208     | 1.265E-19 | -1.279682 | down      | PREDICTED: truncated FRIGIDA-like protein 1 [Sesamum indicum]                                                  |
| c47695.graph_c0 | 183.845786    | 162.403378    | 185.7542      | 68.0988538     | 51.1488789     | 44.146837      | 2.271E-64 | -2.714057 | down      | hypothetical protein VITISV_032357 [Vitis vinifera]                                                            |
| c47697.graph_c0 | 0             | 0             | 0             | 25.8432567     | 19.911125      | 8.77997568     | 1.233E-07 | Inf       | up        | predicted protein, partial [Micromonas pusilla CCMP1545]                                                       |
| c47702.graph_c1 | 109.090209    | 108.07668     | 101.749072    | 99.1997844     | 108.049858     | 102.195364     | 4.227E-14 | -1.061414 | down      | -                                                                                                              |
| c47705.graph_c0 | 0.70409477    | 0             | 7.23831726    | 72.0010412     | 90.7070376     | 101.005102     | 1.743E-24 | 4.003041  | up        | -                                                                                                              |



| #ID             | 0 h-1<br>FPKM | 0 h-2<br>FPKM | 0 h-3<br>FPKM | 48 h-1<br>FPKM | 48 h-2<br>FPKM | 48 h-3<br>FPKM | FDR       | log2FC    | regulated | nr_annotation                                                                                     |
|-----------------|---------------|---------------|---------------|----------------|----------------|----------------|-----------|-----------|-----------|---------------------------------------------------------------------------------------------------|
| c47705.graph_c1 | 0.38095805    | 0.10895415    | 0.27974067    | 3.48456518     | 3.05409743     | 2.96670866     | 2.108E-08 | 2.612094  | up        | hypothetical protein MIMGU_mgv1a003510mg [Erythranthe guttata]                                    |
| c47708.graph_c0 | 0             | 0             | 0             | 7.09842332     | 17.4285177     | 6.16751946     | 3.084E-06 | Inf       | up        | -                                                                                                 |
| c47709.graph_c0 | 18.6837904    | 15.6453601    | 18.641922     | 3.04119084     | 2.93685424     | 2.96375078     | 5.39E-72  | -3.584015 | down      | hypothetical protein MIMGU_mgv1a025551mg [Erythranthe guttata]                                    |
| c47713.graph_c1 | 12.6775252    | 12.8424263    | 12.5786023    | 10.3836016     | 10.6106163     | 10.2675826     | 4.179E-17 | -1.302781 | down      | PREDICTED: pumilio homolog 23 isoform X1 [Sesamum indicum]                                        |
| c47713.graph_c3 | 10.5059155    | 11.3208088    | 8.26093978    | 4.88049506     | 5.43171202     | 5.56247649     | 5.318E-20 | -1.939308 | down      | hypothetical protein MIMGU_mgv1a016005mg [Erythranthe guttata]                                    |
| c47714.graph_c2 | 2.32424863    | 2.57147875    | 2.82955406    | 0.22539468     | 0              | 0.10027741     | 2.442E-15 | -5.554536 | down      | hypothetical protein MIMGU_mgv1a022738mg [Erythranthe guttata]                                    |
| c47718.graph_c0 | 0.48949962    | 0.3392237     | 0.43547981    | 4.85648134     | 5.36534681     | 6.11150745     | 8.859E-10 | 2.671242  | up        | hypothetical protein MIMGU_mgv1a004721mg [Erythranthe guttata]                                    |
| c47719.graph_c0 | 22.4539097    | 22.0858774    | 22.5875735    | 17.471289      | 17.3876131     | 15.6169146     | 1.267E-22 | -1.427939 | down      | PREDICTED: arginine/serine-rich coiled-coil protein 2 [Sesamum indicum]                           |
| c47719.graph_c1 | 168.941026    | 182.266193    | 153.5034      | 156.3102       | 160.019625     | 157.882815     | 5.736E-13 | -1.106375 | down      | PREDICTED: eukaryotic translation initiation factor isoform 4G-1-like [Sesamum indicum]           |
| c47722.graph_c0 | 19.8341018    | 17.4742069    | 17.8936961    | 157.38102      | 171.830644     | 179.681265     | 2.062E-49 | 2.185797  | up        | Heterogeneous nuclear ribonucleoprotein F [Gossypium arboreum]                                    |
| c47725.graph_c0 | 3.28782342    | 2.10837098    | 3.03670672    | 13.5829808     | 10.9300195     | 10.3594754     | 0.0006031 | 1.034723  | up        | PREDICTED: RING finger and CHY zinc finger domain-containing protein 1-like [Sesamum indicum]     |
| c47726.graph_c0 | 84.864226     | 74.369074     | 77.2739779    | 2.74158567     | 1.40211332     | 1.51413917     | 1.21E-197 | -6.389109 | down      | PREDICTED: E3 ubiquitin-protein ligase At4g11680-like [Sesamum indicum]                           |
| c47726.graph_c1 | 37.2192574    | 37.5429686    | 37.2868896    | 9.89471996     | 9.43961597     | 9.35159657     | 1.479E-91 | -2.982121 | down      | PREDICTED: LOW QUALITY PROTEIN: uncharacterized protein LOC105174988 [Sesamum indicum]            |
| c47730.graph_c0 | 1.108891      | 0.59200074    | 0.56998753    | 20.0230212     | 27.5611221     | 32.7845335     | 6.475E-20 | 4.126048  | up        | hypothetical protein MIMGU_mgv1a012535mg [Erythranthe guttata]                                    |
| c47747.graph_c3 | 9.61239059    | 7.95131221    | 7.46698671    | 55.0126823     | 61.9895923     | 70.1311969     | 4.241E-34 | 1.883737  | up        | PREDICTED: ultraviolet-B receptor UVK8 [Sesamum indicum]                                          |
| c47748.graph_c0 | 3.92149342    | 3.6712563     | 4.20543754    | 13.788174      | 19.0743241     | 18.9290805     | 2.956E-09 | 1.109814  | up        | PREDICTED: pentatricopeptide repeat-containing protein At1g11710, mitochondrial [Sesamum indicum] |
| c47749.graph_c0 | 1.80626656    | 1.90045867    | 1.98227382    | 9.25552216     | 10.5771588     | 10.3754431     | 1.727E-14 | 1.388061  | up        | PREDICTED: importin-11 [Sesamum indicum]                                                          |
| c47753.graph_c0 | 173.504354    | 165.705319    | 160.335146    | 18.9349754     | 21.4756493     | 20.2234058     | 1.39E-150 | -4.061105 | down      | PREDICTED: transcription factor PIF1 [Sesamum indicum]                                            |
| c47755.graph_c0 | 2.67213774    | 1.83415781    | 1.76595572    | 0.07033564     | 0.07451209     | 0.06258423     | 1.924E-17 | -5.932334 | down      | --                                                                                                |
| c47756.graph_c0 | 42.2515463    | 40.6938351    | 50.1183783    | 22.0885197     | 21.8921013     | 14.2820753     | 5.616E-22 | -2.207727 | down      | ent-copalyl diphosphate synthase [Andrographis paniculata]                                        |
| c47757.graph_c0 | 35.521868     | 32.9087715    | 36.1915554    | 10.9862707     | 10.0467129     | 9.59724071     | 7.376E-71 | -2.78795  | down      | PREDICTED: uncharacterized protein LOC105172510 isoform X1 [Sesamum indicum]                      |

| #ID             | 0 h-1<br>FPKM | 0 h-2<br>FPKM | 0 h-3<br>FPKM | 48 h-1<br>FPKM | 48 h-2<br>FPKM | 48 h-3<br>FPKM | FDR       | log2FC    | regulated | nr_annotation                                                                                  |
|-----------------|---------------|---------------|---------------|----------------|----------------|----------------|-----------|-----------|-----------|------------------------------------------------------------------------------------------------|
| c47763.graph_c2 | 212.122713    | 218.481498    | 219.793375    | 107.537105     | 72.1282786     | 53.0838635     | 1.334E-60 | -2.489511 | down      | PREDICTED: uncharacterized protein LOC105161925 [Sesamum indicum]                              |
| c47763.graph_c3 | 0.03476091    | 0.10438716    | 0             | 4.48336257     | 5.19061134     | 6.41132526     | 2.493E-21 | 5.845321  | up        | PREDICTED: U-box domain-containing protein 5 [Sesamum indicum]                                 |
| c47765.graph_c0 | 0             | 0.15235226    | 0.39116568    | 2.71085105     | 2.03007822     | 2.62003852     | 1.1E-06   | 2.725398  | up        | -                                                                                              |
| c47770.graph_c0 | 11.1935456    | 11.3458721    | 8.65947527    | 6.44189329     | 7.15461795     | 7.41918746     | 1.655E-18 | -1.586987 | down      | PREDICTED: probable serine/threonine-protein kinase At1g18390 isoform X1 [Sesamum indicum]     |
| c47771.graph_c0 | 42.2917684    | 41.0488807    | 46.8714143    | 13.3735516     | 14.2443765     | 13.4677176     | 2.742E-69 | -2.683629 | down      | PREDICTED: floral homeotic protein AGAMOUS-like isoform X1 [Sesamum indicum]                   |
| c47775.graph_c0 | 0             | 0             | 0             | 1.25410228     | 1.43485485     | 1.24979979     | 1.204E-11 | Inf       | up        | catalase [Ipomoea batatas]                                                                     |
| c47776.graph_c0 | 9.66083816    | 10.066574     | 9.4486238     | 6.31822663     | 6.53249607     | 6.18951776     | 4.939E-16 | -1.632981 | down      | GTPase-activating protein gyp7 [Glycine soja]                                                  |
| c47778.graph_c0 | 11.617805     | 10.8454314    | 11.5744317    | 8.80298243     | 10.2939338     | 12.4983034     | 5.197E-11 | -1.12944  | down      | PREDICTED: CBS domain-containing protein CBSCBSPB1-like isoform X3 [Sesamum indicum]           |
| c47779.graph_c1 | 25.7539634    | 19.0502967    | 35.1275605    | 23.4529922     | 19.8282372     | 18.6396746     | 0.0036747 | -1.386723 | down      | hypothetical protein VITISV_019132 [Vitis vinifera]                                            |
| c47782.graph_c0 | 0             | 0             | 0             | 1.41060268     | 2.85686948     | 2.99020025     | 4.98E-10  | Inf       | up        | squalene epoxidase [Chlorophytum borivilianum]                                                 |
| c47795.graph_c0 | 0             | 0             | 0             | 48.1435881     | 60.0185305     | 49.3370251     | 1.01E-108 | Inf       | up        | unnamed protein product [Vitis vinifera]                                                       |
| c47797.graph_c0 | 48.0699332    | 50.945166     | 43.7173886    | 40.8247608     | 45.2637137     | 42.5659721     | 1.673E-16 | -1.167512 | down      | PREDICTED: chromatin structure-remodeling complex protein SYD [Sesamum indicum]                |
| c47800.graph_c0 | 51.2482869    | 53.4222098    | 49.3283923    | 40.3120218     | 47.3476228     | 46.6886956     | 6.719E-18 | -1.216719 | down      | PREDICTED: probable alpha,alpha-trehalose-phosphate synthase [UDP-forming] 7 [Sesamum indicum] |
| c47804.graph_c0 | 9.08082723    | 8.67799038    | 8.24954099    | 6.29334361     | 6.10475443     | 5.46484486     | 6.982E-16 | -1.557103 | down      | PREDICTED: MORC family CW-type zinc finger protein 3 isoform X1 [Sesamum indicum]              |
| c47805.graph_c0 | 0             | 0             | 0             | 4.57503164     | 5.91059911     | 3.57439227     | 2.782E-16 | Inf       | up        | -                                                                                              |
| c47806.graph_c0 | 10.2411996    | 10.9970149    | 9.98989971    | 80.6251761     | 94.0901543     | 112.322389     | 1.084E-22 | 2.179239  | up        | hypothetical protein MIMGU_mgv1a0009861mg, partial [Erythranthe guttata]                       |
| c47809.graph_c1 | 2.74325731    | 2.70501913    | 2.36766778    | 15.5785299     | 21.5385489     | 17.9228531     | 1.269E-13 | 1.795311  | up        | PREDICTED: probable E3 ubiquitin-protein ligase LUL4 [Sesamum indicum]                         |
| c47810.graph_c1 | 3.04350875    | 3.04655637    | 2.3806265     | 0              | 0              | 0.32541841     | 9.167E-16 | -5.740425 | down      | -                                                                                              |
| c47810.graph_c2 | 325.27905     | 329.012967    | 313.966124    | 199.097363     | 194.898057     | 180.445064     | 2.655E-29 | -1.769209 | down      | PREDICTED: E3 ubiquitin-protein ligase RKP [Sesamum indicum]                                   |
| c47810.graph_c3 | 23.8975471    | 23.0594417    | 26.8360499    | 3.27264555     | 1.47083624     | 0.79417645     | 1.067E-56 | -4.733366 | down      | -                                                                                              |
| c47816.graph_c0 | 2.89179242    | 3.09998514    | 2.29289287    | 20.0280444     | 18.5150832     | 17.8376456     | 1.954E-22 | 1.75378   | up        | PREDICTED: malonate--CoA ligase isoform X2 [Sesamum indicum]                                   |
| c47820.graph_c0 | 0             | 0             | 0             | 6.12857911     | 5.91537653     | 3.97475709     | 1.591E-23 | Inf       | up        | predicted protein [Hordeum vulgare subsp. vulgare]                                             |
| c47823.graph_c0 | 21.4256518    | 24.1513067    | 20.0510687    | 20.9401945     | 19.3197309     | 22.0687733     | 2.959E-11 | -1.090172 | down      | hypothetical protein MIMGU_mgv1a017876mg [Erythranthe guttata]                                 |

| #ID             | 0 h-1<br>FPKM | 0 h-2<br>FPKM | 0 h-3<br>FPKM | 48 h-1<br>FPKM | 48 h-2<br>FPKM | 48 h-3<br>FPKM | FDR       | log2FC    | regulated | nr_annotation                                                                                              |
|-----------------|---------------|---------------|---------------|----------------|----------------|----------------|-----------|-----------|-----------|------------------------------------------------------------------------------------------------------------|
| c47826.graph_c1 | 22.0862609    | 22.6116289    | 20.8518757    | 20.82644       | 21.4878233     | 22.5813973     | 2.932E-13 | -1.032157 | down      | hypothetical protein MIMGU_mgv1a000321mg<br>[Erythranthe guttata]                                          |
| c47828.graph_c0 | 12.2428195    | 12.4663733    | 11.4603181    | 3.88927029     | 3.86269713     | 3.24435873     | 1.033E-27 | -2.732935 | down      | -                                                                                                          |
| c47832.graph_c0 | 0.17811172    | 0.05348702    | 0.04577612    | 7.87623048     | 12.8113802     | 11.8263755     | 1.936E-30 | 5.857965  | up        | hypothetical protein MIMGU_mgv1a000209mg<br>[Erythranthe guttata]                                          |
| c47833.graph_c0 | 12.0750729    | 11.6972557    | 10.8739449    | 9.45383692     | 9.51705597     | 9.73321865     | 2.604E-18 | -1.28815  | down      | PREDICTED: uncharacterized protein LOC105171928<br>isoform X1 [Sesamum indicum]                            |
| c47836.graph_c1 | 50.9098757    | 50.9400709    | 53.6283132    | 13.0451965     | 14.4074495     | 13.8030979     | 3.217E-89 | -2.933613 | down      | PREDICTED: uncharacterized protein LOC105173629<br>[Sesamum indicum]                                       |
| c47837.graph_c0 | 16.7129929    | 16.6597295    | 15.0068419    | 13.8831584     | 13.6837974     | 13.786231      | 8.109E-14 | -1.242446 | down      | hypothetical protein MIMGU_mgv1a003968mg<br>[Erythranthe guttata]                                          |
| c47838.graph_c0 | 0.73643065    | 0.56257563    | 0.34865251    | 3.24940858     | 2.32642631     | 2.52591962     | 0.001373  | 1.292953  | up        | putative terpenesynthase-1 [Marrubium vulgare]                                                             |
| c47840.graph_c3 | 8.34547202    | 12.8401442    | 4.76633865    | 140.669119     | 83.2591852     | 59.4160988     | 0.0033272 | 2.451472  | up        | -                                                                                                          |
| c47843.graph_c1 | 14.1898011    | 14.8365773    | 14.1741522    | 75.8950032     | 71.7110087     | 63.1512973     | 2.72E-15  | 1.271334  | up        | hypothetical protein MIMGU_mgv1a027115mg, partial<br>[Erythranthe guttata]                                 |
| c47843.graph_c3 | 0.18382992    | 0.061338      | 0.11811436    | 0.95968466     | 1.91373087     | 2.46130354     | 0.0002673 | 2.847985  | up        | PREDICTED: serine/threonine-protein kinase STN7,<br>chloroplastic [Sesamum indicum]                        |
| c47846.graph_c0 | 5.50867929    | 4.54466653    | 5.60086495    | 112.485534     | 119.578345     | 144.898234     | 4.484E-58 | 3.568811  | up        | hypothetical protein MIMGU_mgv1a012852mg<br>[Erythranthe guttata]                                          |
| c47847.graph_c0 | 0             | 0             | 0             | 1.46091991     | 2.57944583     | 1.57073395     | 5.015E-09 | Inf       | up        | triosephosphate isomerase [Genlisea aurea]                                                                 |
| c47848.graph_c2 | 3.48265198    | 3.60635103    | 2.9707036     | 0.77445252     | 1.84598671     | 1.77197965     | 3.08E-11  | -2.224976 | down      | PREDICTED: auxin response factor 18-like isoform X1<br>[Sesamum indicum]                                   |
| c47848.graph_c3 | 4.12744426    | 3.68249279    | 3.68968994    | 0.57863687     | 0.9632788      | 0.88263019     | 5.269E-11 | -3.270902 | down      | -                                                                                                          |
| c47849.graph_c0 | 0             | 0             | 0             | 13.417687      | 30.4137203     | 10.2180436     | 7.405E-08 | Inf       | up        | Eukaryotic translation initiation factor 5A [Rozella<br>allomyces CSF55]                                   |
| c47850.graph_c0 | 22.9760556    | 23.569759     | 21.7592231    | 10.7148297     | 12.9090519     | 13.9738398     | 8.887E-25 | -1.882137 | down      | unnamed protein product [Coffea canephora]                                                                 |
| c47851.graph_c0 | 122.008247    | 117.662985    | 119.289821    | 88.9517993     | 77.6819276     | 66.5081842     | 7.49E-30  | -1.636001 | down      | hypothetical protein MIMGU_mgv1a004485mg<br>[Erythranthe guttata]                                          |
| c47851.graph_c1 | 170.694755    | 170.459897    | 163.089613    | 70.7849232     | 71.9142636     | 81.6695928     | 1.498E-48 | -2.186481 | down      | PREDICTED: NADH dehydrogenase [ubiquinone] iron-<br>sulfur protein 7, mitochondrial-like [Sesamum indicum] |
| c47853.graph_c0 | 26.7383802    | 23.8044074    | 25.5418556    | 22.3442198     | 22.8049796     | 22.8397692     | 5.327E-12 | -1.180058 | down      | PREDICTED: mediator of RNA polymerase II transcription<br>subunit 6 [Sesamum indicum]                      |
| c47853.graph_c1 | 16.1809588    | 14.9424519    | 14.203787     | 6.87609529     | 11.0655989     | 10.5552493     | 1.226E-15 | -1.694035 | down      | hypothetical protein MIMGU_mgv1a026972mg<br>[Erythranthe guttata]                                          |
| c47853.graph_c3 | 96.7143345    | 106.93826     | 94.7916698    | 49.5092527     | 42.4393435     | 44.0530353     | 4.215E-49 | -2.147894 | down      | PREDICTED: probable indole-3-acetic acid-amido<br>synthetase GH3.1 [Sesamum indicum]                       |

| #ID             | 0 h-1<br>FPKM | 0 h-2<br>FPKM | 0 h-3<br>FPKM | 48 h-1<br>FPKM | 48 h-2<br>FPKM | 48 h-3<br>FPKM | FDR       | log2FC    | regulated | nr_annotation                                                                               |
|-----------------|---------------|---------------|---------------|----------------|----------------|----------------|-----------|-----------|-----------|---------------------------------------------------------------------------------------------|
| c47861.graph_c0 | 0.77935794    | 0.78013835    | 0.70694527    | 4.70216572     | 5.10068877     | 4.89798768     | 1.833E-09 | 1.679779  | up        | PREDICTED: uncharacterized protein LOC105167319 isoform X5 [Sesamum indicum]                |
| c47863.graph_c0 | 1.06299099    | 1.50219588    | 0.7231688     | 11.9243767     | 15.3175856     | 13.0962124     | 1.954E-21 | 2.600628  | up        | PREDICTED: LOW QUALITY PROTEIN: uncharacterized protein LOC105171608 [Sesamum indicum]      |
| c47863.graph_c1 | 2.01928437    | 1.69671703    | 1.74253396    | 19.3090626     | 23.5627918     | 22.9443641     | 1.183E-53 | 2.571871  | up        | PREDICTED: LOW QUALITY PROTEIN: uncharacterized protein LOC105171608 [Sesamum indicum]      |
| c47865.graph_c0 | 49.8391422    | 45.7295142    | 42.6208742    | 8.56676672     | 8.08630064     | 8.84809837     | 2.56E-117 | -3.453658 | down      | PREDICTED: transcription factor GTE4-like isoform X3 [Sesamum indicum]                      |
| c47865.graph_c1 | 28.0397058    | 34.1364932    | 26.7806387    | 5.35257779     | 5.05405853     | 6.21220635     | 5.783E-39 | -3.437013 | down      | PREDICTED: transcription factor GTE4-like isoform X3 [Sesamum indicum]                      |
| c47865.graph_c3 | 0.60747661    | 0.55280446    | 0.3548325     | 10.3789095     | 12.1809525     | 13.128316      | 1.432E-17 | 3.54203   | up        | hypothetical protein MIMGU_mgv1a012348mg [Erythranthe guttata]                              |
| c47865.graph_c4 | 235.782617    | 232.609558    | 223.254425    | 198.782616     | 222.662276     | 200.168241     | 2.066E-13 | -1.172285 | down      | PREDICTED: patellin-3-like [Sesamum indicum]                                                |
| c47865.graph_c6 | 375.978214    | 345.168882    | 378.285883    | 38.7098664     | 31.1371431     | 18.475801      | 3.63E-184 | -4.647334 | down      | hypothetical protein VITISV_027452 [Vitis vinifera]                                         |
| c47874.graph_c1 | 22.4028717    | 23.0570035    | 22.1996422    | 24.2483869     | 23.0706442     | 20.2181344     | 3.298E-12 | -1.017817 | down      | PREDICTED: dymeclin-like [Sesamum indicum]                                                  |
| c47881.graph_c1 | 23.9163023    | 23.692392     | 21.4310217    | 11.4594409     | 12.0972422     | 11.3069378     | 7.914E-45 | -2.002512 | down      | PREDICTED: uncharacterized protein LOC105166430 [Sesamum indicum]                           |
| c47882.graph_c0 | 40.0267518    | 37.9725079    | 35.6569771    | 32.9254629     | 33.1063816     | 33.3736998     | 2.533E-17 | -1.20981  | down      | PREDICTED: survival of motor neuron-related-splicing factor 30 isoform X2 [Sesamum indicum] |
| c47884.graph_c0 | 0             | 0             | 0             | 6.67617772     | 6.86660268     | 4.61392061     | 2.53E-17  | Inf       | up        | cysteine peroxiredoxin [Lichtheimia corymbifera JMRC:FSU:9682]                              |
| c47886.graph_c0 | 1.35183649    | 1.46144536    | 1.70242014    | 0.64760797     | 1.37212424     | 1.21896432     | 0.0003462 | -1.511183 | down      | PREDICTED: ferric reduction oxidase 2-like isoform X2 [Sesamum indicum]                     |
| c47889.graph_c0 | 36.6568199    | 34.6722726    | 34.8966332    | 19.7949452     | 22.6378655     | 19.4596495     | 5.722E-36 | -1.797865 | down      | PREDICTED: serine/threonine-protein kinase EDR1 [Sesamum indicum]                           |
| c47891.graph_c1 | 54.680133     | 51.1395561    | 58.0040062    | 4.83994186     | 5.07501181     | 7.60238113     | 9.75E-138 | -4.247766 | down      | hypothetical protein MIMGU_mgv1a011954mg [Erythranthe guttata]                              |
| c47891.graph_c2 | 786.407989    | 791.290727    | 812.491392    | 444.150629     | 502.163682     | 521.486047     | 2.361E-20 | -1.723827 | down      | PREDICTED: fumarate hydratase 1, mitochondrial [Sesamum indicum]                            |
| c47894.graph_c0 | 2.97689395    | 2.88957562    | 3.12989448    | 22.937347      | 26.0601594     | 21.5187261     | 6.507E-10 | 1.951378  | up        | PREDICTED: uncharacterized protein LOC105169824 isoform X1 [Sesamum indicum]                |
| c47896.graph_c0 | 26.4078868    | 26.2650151    | 24.5887414    | 23.8417048     | 23.4415042     | 21.5955067     | 6.864E-17 | -1.181395 | down      | PREDICTED: transducin beta-like protein 5 [Sesamum indicum]                                 |
| c47896.graph_c1 | 886.559198    | 830.280553    | 912.005776    | 159.816314     | 160.787636     | 151.781365     | 1.74E-74  | -3.49405  | down      | PREDICTED: uncharacterized protein LOC105160195 [Sesamum indicum]                           |
| c47896.graph_c2 | 22.0835764    | 20.8888628    | 22.7807214    | 13.7187622     | 12.5560365     | 13.7015911     | 2.715E-13 | -1.73486  | down      | PREDICTED: cytochrome P450 CYP72A219-like [Sesamum indicum]                                 |

| #ID             | 0 h-1<br>FPKM | 0 h-2<br>FPKM | 0 h-3<br>FPKM | 48 h-1<br>FPKM | 48 h-2<br>FPKM | 48 h-3<br>FPKM | FDR       | log2FC    | regulated | nr_annotation                                                                                  |
|-----------------|---------------|---------------|---------------|----------------|----------------|----------------|-----------|-----------|-----------|------------------------------------------------------------------------------------------------|
| c47898.graph_c0 | 0.5631971     | 1.36913398    | 0.41356032    | 3.11312339     | 5.33958141     | 5.27626376     | 0.0038905 | 1.528344  | up        | PREDICTED: chlorophyll a-b binding protein 13, chloroplastic [Sesamum indicum]                 |
| c47900.graph_c0 | 109.067233    | 113.480735    | 98.9436018    | 56.6566049     | 58.2721998     | 60.5466517     | 7.279E-41 | -1.89057  | down      | PREDICTED: glycine-rich RNA-binding protein RZ1C-like isoform X1 [Sesamum indicum]             |
| c47902.graph_c0 | 5.50678276    | 5.2285758     | 5.09919499    | 78.0378677     | 91.4051365     | 92.7383964     | 3.032E-80 | 3.029554  | up        | PREDICTED: probable starch synthase 4, chloroplastic/amyloplastic isoform X3 [Sesamum indicum] |
| c47903.graph_c0 | 0             | 0             | 0             | 1.03810782     | 1.09974936     | 0.84672692     | 1.581E-10 | Inf       | up        | unknown [Chondrus crispus]                                                                     |
| c47904.graph_c0 | 153.121301    | 143.562816    | 152.233291    | 96.0444802     | 95.7376707     | 91.7988521     | 1.258E-30 | -1.6799   | down      | PREDICTED: ATP-dependent RNA helicase DHX36 isoform X1 [Sesamum indicum]                       |
| c47909.graph_c0 | 9.7236531     | 9.84678858    | 10.0447487    | 8.38405163     | 9.84009785     | 8.49706062     | 6.516E-13 | -1.168076 | down      | PREDICTED: transcription initiation factor TFIID subunit 8-like [Sesamum indicum]              |
| c47910.graph_c0 | 23.4819139    | 21.0411488    | 19.9951185    | 19.306934      | 20.7305847     | 16.4030254     | 1.34E-15  | -1.208738 | down      | PREDICTED: cytochrome P450 CYP72A219-like [Sesamum indicum]                                    |
| c47911.graph_c2 | 120.574232    | 119.426922    | 129.895818    | 18.8848049     | 18.4607411     | 16.7799853     | 2.15E-135 | -3.78984  | down      | hypothetical protein MIMGU_mgv1a008076mg [Erythranthe guttata]                                 |
| c47912.graph_c0 | 0             | 0             | 0             | 2.27996994     | 4.83070338     | 3.12999975     | 4.443E-09 | Inf       | up        | -                                                                                              |
| c47913.graph_c1 | 29.2355588    | 30.0596812    | 25.5097134    | 30.6578701     | 24.3763349     | 22.6636208     | 2.745E-11 | -1.136923 | down      | PREDICTED: lysophospholipid acyltransferase LPEAT2 [Sesamum indicum]                           |
| c47914.graph_c0 | 0             | 0             | 0             | 22.8581659     | 44.6493186     | 20.6733993     | 1.48E-13  | Inf       | up        | hypothetical protein JCGZ_08960 [Jatropha curcas]                                              |
| c47915.graph_c0 | 4.24654579    | 1.92614287    | 2.13163261    | 0              | 0              | 0              | 9.561E-11 | -Inf      | down      | PREDICTED: stem-specific protein TSJT1-like isoform X1 [Elaeis guineensis]                     |
| c47920.graph_c0 | 6.58369259    | 6.11647381    | 6.58023772    | 35.9162503     | 34.6051916     | 35.3443484     | 6.531E-16 | 1.439897  | up        | indole-3-glycerol phosphate lyase IGL1 [Apneianura squarrosa]                                  |
| c47923.graph_c0 | 0             | 0             | 0             | 6.57581033     | 9.89944156     | 2.72758814     | 6.013E-07 | Inf       | up        | --                                                                                             |
| c47924.graph_c0 | 22.1390296    | 22.7450864    | 20.6812748    | 9.59951596     | 7.86650137     | 5.93347201     | 3.362E-57 | -2.496813 | down      | PREDICTED: cysteine-rich receptor-like protein kinase 3 [Nicotiana glauca]                     |
| c47927.graph_c0 | 0             | 0             | 0             | 1.08012541     | 1.29683015     | 0.67276237     | 1.349E-08 | Inf       | up        | hypothetical protein MVLG_06307 [Microbotryum violaceum p1A1 Lamole]                           |
| c47934.graph_c0 | 14.2326956    | 13.5532759    | 11.6450493    | 7.75921285     | 7.59564553     | 9.22003352     | 7.238E-15 | -1.698759 | down      | hypothetical protein MIMGU_mgv1a010597mg [Erythranthe guttata]                                 |
| c47937.graph_c1 | 39.199188     | 36.420621     | 38.9785371    | 7.20886035     | 7.50378181     | 7.58342764     | 4.61E-114 | -3.380211 | down      | PREDICTED: ATP-dependent DNA helicase 2 subunit KU80 isoform X2 [Sesamum indicum]              |
| c47938.graph_c0 | 197.426065    | 198.959785    | 181.989296    | 147.15375      | 163.636844     | 153.261967     | 1.345E-19 | -1.335773 | down      | hypothetical protein MIMGU_mgv1a002698mg [Erythranthe guttata]                                 |
| c47942.graph_c0 | 0             | 0             | 0             | 1.04333436     | 0.7368575      | 0.61890176     | 2.164E-08 | Inf       | up        | -                                                                                              |
| c47943.graph_c0 | 0             | 0             | 0             | 2.00613797     | 1.63948623     | 1.22403395     | 1.609E-10 | Inf       | up        | --                                                                                             |
| c47944.graph_c1 | 4.77697983    | 4.49263338    | 4.65392157    | 30.9084035     | 43.651046      | 43.8394586     | 1.192E-17 | 2.064381  | up        | PREDICTED: MATE efflux family protein DTX1 [Sesamum indicum]                                   |

| #ID             | 0 h-1<br>FPKM | 0 h-2<br>FPKM | 0 h-3<br>FPKM | 48 h-1<br>FPKM | 48 h-2<br>FPKM | 48 h-3<br>FPKM | FDR       | log2FC    | regulated | nr_annotation                                                                                                   |
|-----------------|---------------|---------------|---------------|----------------|----------------|----------------|-----------|-----------|-----------|-----------------------------------------------------------------------------------------------------------------|
| c47946.graph_c0 | 42.6491057    | 44.1070106    | 41.161116     | 34.4068805     | 28.0560882     | 23.5648853     | 2.44E-29  | -1.583732 | down      | PREDICTED: scarecrow-like protein 1 [Sesamum indicum]                                                           |
| c47948.graph_c0 | 1.8445318     | 2.20539692    | 1.48143524    | 951.60968      | 1086.04896     | 1074.57003     | 0         | 8.119168  | up        | PREDICTED: alpha-L-arabinofuranosidase 1-like isoform X2 [Sesamum indicum]                                      |
| c47952.graph_c0 | 1.9012037     | 1.93770942    | 2.13217922    | 12.9611951     | 11.9427724     | 11.7594823     | 9.637E-10 | 1.601397  | up        | PREDICTED: ABC transporter I family member 11, chloroplastic isoform X2 [Sesamum indicum]                       |
| c47953.graph_c0 | 1.75841377    | 1.40813964    | 1.53152789    | 8.15382612     | 7.77991159     | 7.68765611     | 4.062E-08 | 1.314264  | up        | PREDICTED: serine carboxypeptidase-like 45 [Sesamum indicum]                                                    |
| c47954.graph_c0 | 0             | 0             | 0             | 17.8536043     | 28.71718       | 11.4778644     | 7.925E-11 | Inf       | up        | 40S ribosomal protein S11 [Auxenochlorella protothecoides]                                                      |
| c47956.graph_c0 | 20.4064264    | 16.8019499    | 19.0541701    | 11.4060718     | 9.83861701     | 9.98859475     | 9.407E-24 | -1.863655 | down      | hypothetical protein MIMGU_mgv1a0158002mg, partial [Erythranthe guttata]                                        |
| c47957.graph_c0 | 56.5884466    | 58.3645245    | 53.1592309    | 39.6052312     | 45.402904      | 41.5767456     | 2.042E-23 | -1.427905 | down      | PREDICTED: nucleolar complex protein 4 homolog isoform X1 [Sesamum indicum]                                     |
| c47958.graph_c0 | 3.44671142    | 3.58159755    | 3.24805113    | 17.8423607     | 19.894964      | 20.3159306     | 4.28E-13  | 1.479192  | up        | PREDICTED: 3-oxoacyl-[acyl-carrier-protein] synthase II, chloroplastic [Vitis vinifera]                         |
| c47958.graph_c1 | 11.1702903    | 10.6537363    | 11.009171     | 8.74262652     | 9.64765906     | 9.04864836     | 7.291E-12 | -1.277779 | down      | hypothetical protein MIMGU_mgv1a024121mg, partial [Erythranthe guttata]                                         |
| c47961.graph_c0 | 0.3050715     | 0.45806547    | 0.29402171    | 5.23458907     | 6.77359097     | 6.75211053     | 1.236E-12 | 3.129278  | up        | PREDICTED: probable polygalacturonase At3g15720-like [Glycine max]                                              |
| c47963.graph_c0 | 2.90894205    | 3.95713616    | 2.87546592    | 27.2800805     | 30.0646704     | 22.8673695     | 2.841E-13 | 2.025619  | up        | PREDICTED: protein ENHANCED DISEASE RESISTANCE 2-like [Sesamum indicum]                                         |
| c47963.graph_c2 | 7.13039425    | 4.48170756    | 8.94974964    | 2.44427322     | 2.91308748     | 2.31083084     | 3.339E-05 | -2.446553 | down      | -                                                                                                               |
| c47967.graph_c0 | 0             | 0             | 0             | 3.3104713      | 8.86780853     | 3.11395959     | 1.191E-05 | Inf       | up        | hypothetical protein FOMPIDRAFT_1023471 [Fomitopsis pinicola FP-58527 SS1]                                      |
| c47968.graph_c0 | 179.286408    | 160.616204    | 172.227328    | 26.1775491     | 27.1473395     | 25.56358       | 1.96E-130 | -3.716258 | down      | PREDICTED: alpha-galactosidase-like [Sesamum indicum]                                                           |
| c47971.graph_c0 | 221.818253    | 214.295197    | 224.086907    | 61.3226875     | 65.2462502     | 68.0204573     | 3.058E-74 | -2.781636 | down      | PREDICTED: LOW QUALITY PROTEIN: manganese-dependent ADP-ribose/CDP-alcohol diphosphatase-like [Sesamum indicum] |
| c47972.graph_c0 | 3.26540758    | 2.21116412    | 2.83859101    | 13.8028178     | 12.4665434     | 13.6200508     | 0.0011806 | 1.246259  | up        | -                                                                                                               |
| c47972.graph_c1 | 0.15624427    | 0.25024115    | 0.40156013    | 7.02438953     | 8.81389471     | 9.09361535     | 4.078E-24 | 3.916976  | up        | PREDICTED: NF-X1-type zinc finger protein NFXL1 [Prunus mume]                                                   |
| c47972.graph_c3 | 170.258586    | 168.897847    | 173.211786    | 105.104174     | 118.462606     | 117.229395     | 1.613E-27 | -1.608105 | down      | PREDICTED: putative lactoylglutathione lyase [Sesamum indicum]                                                  |
| c47972.graph_c5 | 0.19527785    | 0.0651578     | 0.50187954    | 13.1928642     | 14.2938817     | 16.3277861     | 1.742E-25 | 4.809819  | up        | hypothetical protein MIMGU_mgv1a026403mg, partial [Erythranthe guttata]                                         |
| c47975.graph_c0 | 57.0319485    | 50.9962193    | 49.8231944    | 41.7106171     | 40.1185252     | 43.2653242     | 5.444E-18 | -1.351754 | down      | hypothetical protein PRUPE_ppa009199mg [Prunus persica]                                                         |
| c47977.graph_c0 | 0             | 0             | 0             | 9.82939458     | 25.6982652     | 7.78325881     | 9.827E-06 | Inf       | up        | hypothetical protein CY34DRAFT_809502 [Suillus luteus UH-Slu-Lm8-n1]                                            |

| #ID             | 0 h-1<br>FPKM | 0 h-2<br>FPKM | 0 h-3<br>FPKM | 48 h-1<br>FPKM | 48 h-2<br>FPKM | 48 h-3<br>FPKM | FDR       | log2FC    | regulated | nr_annotation                                                                        |
|-----------------|---------------|---------------|---------------|----------------|----------------|----------------|-----------|-----------|-----------|--------------------------------------------------------------------------------------|
| c47978.graph_c0 | 5.30333039    | 5.22482023    | 3.71237587    | 25.0460197     | 27.7863299     | 28.738154      | 1.925E-23 | 1.502007  | up        | PREDICTED: ABC transporter D family member 1 [Sesamum indicum]                       |
| c47978.graph_c1 | 9.75787293    | 9.262421      | 8.51804431    | 6.63369671     | 8.27548839     | 6.84042343     | 1.462E-11 | -1.359459 | down      | hypothetical protein MIMGU_mgv1a010030mg [Erythranthe guttata]                       |
| c47979.graph_c0 | 8.03468871    | 7.19364792    | 6.75205619    | 54.6364622     | 61.9739787     | 64.1442448     | 3.814E-43 | 2.021154  | up        | hypothetical protein MIMGU_mgv1a024130mg [Erythranthe guttata]                       |
| c47980.graph_c1 | 306.487179    | 306.85427     | 302.475695    | 273.354048     | 282.748563     | 269.846185     | 1.54E-13  | -1.166571 | down      | PREDICTED: protein CLP1 homolog [Sesamum indicum]                                    |
| c47981.graph_c1 | 0.82393781    | 0.48348167    | 0.40161102    | 4.24029553     | 4.10387459     | 5.14710291     | 8.95E-07  | 1.967947  | up        | PREDICTED: uncharacterized protein LOC105174256 [Sesamum indicum]                    |
| c47982.graph_c3 | 98.4547239    | 96.138865     | 89.1826638    | 34.8064855     | 31.7799057     | 30.5032563     | 2.879E-68 | -2.561682 | down      | PREDICTED: uncharacterized protein LOC105178089 [Sesamum indicum]                    |
| c47983.graph_c0 | 0             | 0             | 0             | 16.8485794     | 35.5372518     | 13.033381      | 7.229E-09 | Inf       | up        | PREDICTED: 40S ribosomal protein S19-3 [Prunus mume]                                 |
| c47984.graph_c0 | 0.78341904    | 0.54291013    | 0.54208241    | 0.19431373     | 0.11762962     | 0.22229896     | 1.055E-07 | -2.817131 | down      | hypothetical protein [Beta vulgaris subsp. vulgaris]                                 |
| c47984.graph_c1 | 3.17213568    | 3.21475696    | 3.443351      | 18.0788123     | 18.3446819     | 15.8603041     | 9.169E-16 | 1.393607  | up        | PREDICTED: putative nuclease HAKB11 [Sesamum indicum]                                |
| c47990.graph_c0 | 0.48098542    | 0.64195608    | 0.41205687    | 4.67732652     | 5.37232853     | 5.1694645      | 2.492E-06 | 2.292509  | up        | PREDICTED: kinetochore protein APC2 [Sesamum indicum]                                |
| c47991.graph_c0 | 0             | 0             | 0             | 0.50955216     | 0.46619845     | 0.53583217     | 4.331E-10 | Inf       | up        | P-ATPase family transporter: sodium/potassium ion [Ostreococcus lucimarinus CCE9901] |
| c47997.graph_c0 | 54.2459656    | 56.1560151    | 47.3352951    | 45.7917807     | 56.849459      | 56.536789      | 3.794E-13 | -1.006721 | down      | PREDICTED: importin subunit beta-1-like [Sesamum indicum]                            |
| c47999.graph_c0 | 30.6202899    | 15.7295958    | 16.8407466    | 0              | 0              | 0              | 8.862E-22 | -Inf      | down      | --                                                                                   |
| c48000.graph_c0 | 7.69961942    | 8.11796583    | 7.7248654     | 3.51762453     | 3.80349039     | 3.4274368      | 4.941E-35 | -2.149098 | down      | PREDICTED: uncharacterized protein LOC105159735 isoform X3 [Sesamum indicum]         |
| c48004.graph_c0 | 2.402911      | 2.18355032    | 2.62794533    | 8.3524692      | 11.476345      | 14.0676705     | 6.718E-05 | 1.20623   | up        | PREDICTED: inactive protein kinase SELMODRAFT_444075 [Sesamum indicum]               |
| c48005.graph_c0 | 6.15667496    | 6.36164123    | 5.44452203    | 112.035875     | 112.227433     | 121.667065     | 1.908E-81 | 3.250747  | up        | PREDICTED: uncharacterized protein LOC105173858 [Sesamum indicum]                    |
| c48007.graph_c0 | 2.01089875    | 2.09918003    | 1.40278873    | 0.95275085     | 0.756993       | 0.30613266     | 1.676E-09 | -2.454181 | down      | PREDICTED: uncharacterized protein LOC104226160 [Nicotiana sylvestris]               |
| c48013.graph_c0 | 47.3825275    | 51.1030022    | 46.3069789    | 45.268611      | 40.0546638     | 36.69968       | 1.937E-19 | -1.260581 | down      | PREDICTED: OBERON-like protein [Sesamum indicum]                                     |
| c48014.graph_c0 | 2.84142316    | 3.35513216    | 3.03096774    | 18.3620523     | 17.9715648     | 16.7681052     | 3.6E-21   | 1.50826   | up        | PREDICTED: uncharacterized protein LOC105158471, partial [Sesamum indicum]           |
| c48016.graph_c0 | 65.9167395    | 62.5008061    | 61.0645323    | 36.7636592     | 40.7195128     | 39.5238        | 4.175E-33 | -1.713982 | down      | PREDICTED: probable F-box protein At1g60180 [Sesamum indicum]                        |
| c48017.graph_c1 | 4.90076062    | 4.83729631    | 4.65193848    | 20.0889468     | 24.4149113     | 23.3201175     | 5.788E-15 | 1.21649   | up        | PREDICTED: bifunctional purple acid phosphatase 26 isoform X1 [Sesamum indicum]      |
| c48024.graph_c0 | 4.30159372    | 3.12296125    | 3.94837017    | 3.17903665     | 3.32166956     | 3.83616551     | 0.0012266 | -1.157369 | down      | hypothetical protein MIMGU_mgv1a020521mg, partial [Erythranthe guttata]              |

| #ID             | 0 h-1<br>FPKM | 0 h-2<br>FPKM | 0 h-3<br>FPKM | 48 h-1<br>FPKM | 48 h-2<br>FPKM | 48 h-3<br>FPKM | FDR       | log2FC    | regulated | nr_annotation                                                                           |
|-----------------|---------------|---------------|---------------|----------------|----------------|----------------|-----------|-----------|-----------|-----------------------------------------------------------------------------------------|
| c48025.graph_c0 | 16.2406698    | 15.389896     | 14.3306672    | 14.496481      | 15.9560562     | 14.6739571     | 4.65E-10  | -1.043931 | down      | PREDICTED: fructose-bisphosphate aldolase cytoplasmic isozyme [Elaeis guineensis]       |
| c48031.graph_c1 | 1.06918099    | 1.19723062    | 0.9547718     | 3.99008177     | 7.30441099     | 6.64019579     | 0.000129  | 1.451376  | up        | PREDICTED: cytochrome P450 CYP749A22-like [Sesamum indicum]                             |
| c48033.graph_c0 | 8.15502801    | 9.31484797    | 9.34896175    | 36.0995387     | 41.7437462     | 44.5202501     | 8.263E-14 | 1.168268  | up        | PREDICTED: protease Do-like 2, chloroplastic [Sesamum indicum]                          |
| c48037.graph_c0 | 0             | 0             | 0             | 3.56164418     | 8.65217772     | 2.51344759     | 6.308E-05 | Inf       | up        | PREDICTED: imoi protease aeurain-like [Eucalyptus grandis]                              |
| c48037.graph_c1 | 0             | 0             | 0             | 4.40059038     | 13.2950251     | 5.07580223     | 7.008E-06 | Inf       | up        | --                                                                                      |
| c48045.graph_c1 | 0.4198272     | 0.38792086    | 0.45649541    | 1.87435759     | 3.12031435     | 2.25019571     | 0.0017298 | 1.492794  | up        | PREDICTED: putative nuclease HARBI1 [Brassica rapa]                                     |
| c48046.graph_c0 | 31.8626314    | 36.6153891    | 35.1060521    | 13.2463602     | 11.8999098     | 11.8336778     | 3.63E-49  | -2.501734 | down      | PREDICTED: uncharacterized protein LOC105172478 [Sesamum indicum]                       |
| c48046.graph_c1 | 33.6910287    | 32.8451899    | 32.0027229    | 25.3291871     | 23.9219467     | 24.9450715     | 9.782E-24 | -1.425518 | down      | PREDICTED: probable NOT transcription complex subunit VIP2 isoform X2 [Sesamum indicum] |
| c48050.graph_c1 | 0             | 0             | 0             | 21.3826713     | 54.0399138     | 19.2748805     | 2.78E-08  | Inf       | up        | unknown [Lotus japonicus]                                                               |
| c48052.graph_c1 | 0             | 0             | 0             | 1.79404181     | 1.69759629     | 1.67381924     | 5.739E-18 | Inf       | up        | --                                                                                      |
| c48054.graph_c0 | 0.53730539    | 0.53784342    | 0.39188196    | 0.28094638     | 0.46770212     | 0.27379244     | 0.0007062 | -1.541267 | down      | PREDICTED: protein LONGIFOLIA 2-like [Sesamum indicum]                                  |
| c48055.graph_c0 | 0.36873413    | 0.30199366    | 0.17230471    | 2.90290742     | 3.50058287     | 3.57221961     | 2.807E-07 | 2.550422  | up        | farnesyl diphosphate synthase [Leibnitzia anandria]                                     |
| c48059.graph_c1 | 3.91055298    | 3.66788809    | 3.75901939    | 33.2749294     | 37.0388346     | 35.6025978     | 3.97E-49  | 2.204777  | up        | PREDICTED: protein transport protein Sec24-like At4g32640 [Sesamum indicum]             |
| c48062.graph_c3 | 76.9083771    | 74.9822743    | 73.076858     | 46.3777686     | 46.7996556     | 48.8564931     | 5.216E-30 | -1.680946 | down      | PREDICTED: probable protein phosphatase 2C 6 [Sesamum indicum]                          |
| c48066.graph_c0 | 0             | 0             | 0             | 3.58420529     | 3.48387371     | 3.09056913     | 3.628E-17 | Inf       | up        | predicted protein [Hordeum vulgare subsp. vulgare]                                      |
| c48067.graph_c0 | 0             | 0             | 0             | 10.0023618     | 13.0716521     | 11.8180877     | 1.902E-39 | Inf       | up        | --                                                                                      |
| c48068.graph_c2 | 0.10574163    | 0.15877127    | 0             | 1.55865734     | 1.70280872     | 1.64692466     | 1.17E-06  | 3.210511  | up        | hypothetical protein MIMGU_mgv1a000605mg [Erythranthe guttata]                          |
| c48071.graph_c1 | 28.575571     | 28.4845024    | 26.0425333    | 147.572509     | 160.62353      | 189.159636     | 9.763E-25 | 1.56202   | up        | hyponeucal protein POPTR_0003815500g [Populus trichocarpa]                              |
| c48076.graph_c2 | 37.8500862    | 36.1069281    | 35.3082089    | 31.7803499     | 36.5511017     | 36.5695336     | 5.717E-14 | -1.078296 | down      | PREDICTED: eukaryotic translation initiation factor 4G-like [Sesamum indicum]           |
| c48076.graph_c3 | 0             | 0             | 0             | 2.038228       | 1.38192347     | 1.41461035     | 1.243E-11 | Inf       | up        | -                                                                                       |
| c48078.graph_c0 | 27.8483402    | 29.5806582    | 26.6249475    | 8.47371365     | 9.45833066     | 9.69224148     | 8.774E-73 | -2.624348 | down      | PREDICTED: ankyrin repeat protein SKIP35-like [Sesamum indicum]                         |
| c48078.graph_c1 | 38.3818327    | 36.728808     | 38.3099909    | 26.797872      | 13.0754757     | 14.3463273     | 2.827E-24 | -2.06824  | down      | -                                                                                       |
| c48090.graph_c0 | 0.32247233    | 0.96838571    | 0.20719485    | 10.397889      | 13.8478089     | 17.0500757     | 1.493E-10 | 3.768301  | up        | hypothetical protein [Arabidopsis thaliana]                                             |
| c48090.graph_c2 | 51.6566556    | 53.9833048    | 47.0427886    | 28.9724304     | 37.8264497     | 41.0860692     | 4.594E-24 | -1.522779 | down      | hypothetical protein MIMGU_mgv1a003910mg [Erythranthe guttata]                          |



| #ID             | 0 h-1<br>FPKM | 0 h-2<br>FPKM | 0 h-3<br>FPKM | 48 h-1<br>FPKM | 48 h-2<br>FPKM | 48 h-3<br>FPKM | FDR       | log2FC    | regulated | nr_annotation                                                                                                                                         |
|-----------------|---------------|---------------|---------------|----------------|----------------|----------------|-----------|-----------|-----------|-------------------------------------------------------------------------------------------------------------------------------------------------------|
| c48090.graph_c3 | 0.99459919    | 0.9244812     | 1.46068496    | 4.45054972     | 5.82418666     | 5.4742177      | 0.0083352 | 1.193523  | up        | hypothetical protein MIMGU_mgv1a003194mg [Erythranthe guttata]                                                                                        |
| c48091.graph_c0 | 0.26346833    | 0.36089663    | 0.37420589    | 1.36692056     | 1.5292877      | 1.78463176     | 0.0029078 | 1.205625  | up        | PREDICTED: myosin-2-like [Sesamum indicum]                                                                                                            |
| c48091.graph_c1 | 21.4541658    | 22.0810455    | 17.3024902    | 330.960726     | 332.501183     | 350.665334     | 2.192E-91 | 3.04357   | up        | PREDICTED: pentatricopeptide repeat-containing protein At2g13420, mitochondrial-like [Sesamum indicum]                                                |
| c48095.graph_c0 | 5.04741889    | 5.35952949    | 5.08856851    | 25.4594552     | 24.9299944     | 29.1000223     | 2.437E-15 | 1.340813  | up        | PREDICTED: maltose excess protein 1-like, chloroplastic [Sesamum indicum]                                                                             |
| c48096.graph_c0 | 8.72749305    | 8.21178235    | 6.18340563    | 3.37871933     | 3.64662433     | 4.13657623     | 9.191E-18 | -2.067206 | down      | PREDICTED: putative SWI/SNF-related matrix-associated actin-dependent regulator of chromatin subfamily A member 3-like 2 isoform X3 [Sesamum indicum] |
| c48097.graph_c0 | 0             | 0.06858486    | 0             | 0.97838538     | 0.86930637     | 0.61781779     | 1.471E-08 | 4.167074  | up        | PREDICTED: lisH domain and HEAT repeat-containing protein KIAA1468 homolog isoform X1 [Sesamum indicum]                                               |
| c48100.graph_c0 | 51.3881423    | 53.4628498    | 47.4214159    | 36.536371      | 34.1328851     | 31.078908      | 5.565E-30 | -1.59598  | down      | PREDICTED: uncharacterized protein LOC105166426 [Sesamum indicum]                                                                                     |
| c48105.graph_c0 | 27.7789966    | 15.5684852    | 17.6882389    | 3.33306685     | 5.92555293     | 2.14760688     | 1.443E-09 | -3.43968  | down      | hypothetical protein AOL_s00169g48 [Arthrobotrys oligospora ATCC 24927]                                                                               |
| c48109.graph_c0 | 116.935893    | 113.453806    | 107.41553     | 69.386252      | 80.2141216     | 73.9465133     | 1.821E-29 | -1.614392 | down      | PREDICTED: cleft lip and palate transmembrane protein 1 homolog [Sesamum indicum]                                                                     |
| c48111.graph_c5 | 18.4257432    | 17.7992919    | 16.5579088    | 12.503727      | 14.6714048     | 16.7238197     | 1.447E-13 | -1.286245 | down      | PREDICTED: ribonuclease II, chloroplastic/mitochondrial [Sesamum indicum]                                                                             |
| c48112.graph_c1 | 0.52943327    | 0.52996342    | 1.08854835    | 7.31622696     | 4.6503932      | 5.90234084     | 7.884E-05 | 2.03754   | up        | PREDICTED: cytochrome P450 90A1 [Sesamum indicum]                                                                                                     |
| c48112.graph_c3 | 7.9967825     | 6.88784262    | 7.24908971    | 0.74242674     | 1.21001709     | 1.06713414     | 3.488E-25 | -3.89865  | down      | PREDICTED: uncharacterized protein LOC105163706 [Sesamum indicum]                                                                                     |
| c48114.graph_c0 | 159.373403    | 156.0553      | 157.89243     | 65.816627      | 60.459942      | 74.9689682     | 1.835E-54 | -2.251384 | down      | ribosomal protein L20 (chloroplast) [Anurogrammis paniculata]                                                                                         |
| c48118.graph_c0 | 2.55953286    | 2.19608216    | 3.21078914    | 0.50528756     | 0.41633737     | 0.39964607     | 2.593E-12 | -3.608418 | down      | PREDICTED: sodium/hydrogen exchanger 4 isoform X3 [Nelumbo nucifera]                                                                                  |
| c48119.graph_c1 | 12.7431571    | 13.399073     | 11.1463225    | 9.3326696      | 9.94953898     | 9.41020331     | 1.132E-18 | -1.394681 | down      | PREDICTED: uncharacterized protein LOC105173907 [Sesamum indicum]                                                                                     |
| c48122.graph_c1 | 181.404108    | 201.097442    | 159.934232    | 68.424096      | 64.9249116     | 59.3528477     | 1.702E-52 | -2.507044 | down      | PREDICTED: NF-X1-type zinc finger protein NFXL1 [Sesamum indicum]                                                                                     |
| c48125.graph_c1 | 11.4530462    | 9.20635274    | 13.1566584    | 55.6873809     | 57.2439656     | 62.637265      | 1.213E-16 | 1.355185  | up        | PREDICTED: sister chromatid cohesion 1 protein 3-like [Sesamum indicum]                                                                               |
| c48126.graph_c0 | 0.08555543    | 0.0856411     | 0.05497106    | 2.26605318     | 2.40060857     | 2.61245003     | 4.511E-13 | 3.993576  | up        | PREDICTED: cysteine-rich receptor-like protein kinase 2 [Sesamum indicum]                                                                             |
| c48133.graph_c0 | 0.32706341    | 0.27702308    | 0.45261938    | 2.78134286     | 3.87955242     | 4.20719766     | 1.999E-08 | 2.333998  | up        | PREDICTED: probable LRR receptor-like serine/threonine-protein kinase MRH1 isoform X3 [Nelumbo nucifera]                                              |

| #ID             | 0 h-1<br>FPKM | 0 h-2<br>FPKM | 0 h-3<br>FPKM | 48 h-1<br>FPKM | 48 h-2<br>FPKM | 48 h-3<br>FPKM | FDR       | log2FC    | regulated | nr_annotation                                                                                    |
|-----------------|---------------|---------------|---------------|----------------|----------------|----------------|-----------|-----------|-----------|--------------------------------------------------------------------------------------------------|
| c48134.graph_c1 | 295.021142    | 296.319902    | 290.191209    | 120.044349     | 118.730501     | 116.522405     | 1.303E-51 | -2.327844 | down      | PREDICTED: protein ALUMINUM SENSITIVE 3 [Sesamum indicum]                                        |
| c48135.graph_c0 | 3.10375323    | 2.9938844     | 2.75565345    | 0.57187598     | 0.38553026     | 0.37007404     | 2.133E-14 | -3.745374 | down      | PREDICTED: formin-like protein 5 [Nicotiana glauca]                                              |
| c48139.graph_c0 | 0             | 0             | 0.18038052    | 1.487153       | 1.71245464     | 2.53145352     | 4.068E-08 | 3.934216  | up        | tomatoeliformin<br>hypothetical protein VITISV_002420 [Vitis vinifera]                           |
| c48141.graph_c0 | 13.2559406    | 10.3778681    | 10.7045019    | 8.26820724     | 9.26256317     | 7.54726835     | 3.058E-16 | -1.470063 | down      | PREDICTED: peptidyl-prolyl cis-trans isomerase CYP40-like isoform X1 [Sesamum indicum]           |
| c48143.graph_c2 | 3.07489539    | 2.25351699    | 2.75184161    | 26.0515894     | 24.5974981     | 24.6208923     | 9.709E-19 | 2.203432  | up        | PREDICTED: protein transport protein SEC13 homolog B-like [Sesamum indicum]                      |
| c48143.graph_c4 | 1.16297857    | 1.11936838    | 1.4944735     | 4.86256084     | 5.67515396     | 6.89335042     | 0.0019052 | 1.181645  | up        | PREDICTED: NAC transcription factor 29-like isoform X3 [Sesamum indicum]                         |
| c48149.graph_c0 | 0             | 0             | 0             | 2.93001842     | 4.74519423     | 1.79800881     | 4.195E-08 | Inf       | up        | citrate synthase, mitochondrial, putative (ISS), partial [Ostreococcus tauri]                    |
| c48150.graph_c0 | 4.66837668    | 5.34250533    | 4.53298916    | 1.31682199     | 1.5101978      | 1.60168204     | 2.816E-42 | -2.73505  | down      | PREDICTED: CSI complex subunit CTC1 [Sesamum indicum]                                            |
| c48154.graph_c0 | 32.8359313    | 30.4537196    | 31.3819369    | 13.9868373     | 12.864683      | 12.9277837     | 1.137E-39 | -2.266512 | down      | hypothetical protein MIMGU_mgv1a024172mg [Erythranthe guttata]                                   |
| c48157.graph_c1 | 269.174604    | 258.621146    | 281.562204    | 250.768761     | 220.654153     | 208.911846     | 8.889E-17 | -1.265625 | down      | Metal tolerance protein 3 [Triticum urartu]                                                      |
| c48159.graph_c0 | 0             | 0             | 0             | 0.68681072     | 1.8189817      | 0.53473004     | 0.0009212 | Inf       | up        | atp-dependent rna helicase rrp3 [Lichtheimia corymbifera JMRC:FSU:9682]                          |
| c48160.graph_c0 | 0             | 0             | 0             | 1.50145741     | 1.2923723      | 0.87674197     | 1.538E-09 | Inf       | up        | hypothetical protein VOLCADRAFT_45407 [Volvox carteri f. nagariensis]                            |
| c48161.graph_c2 | 1.02361066    | 0.81970852    | 0.78922814    | 23.3239516     | 18.7814269     | 20.5856937     | 4.141E-24 | 3.561878  | up        | hypothetical protein MIMGU_mgv1a011390mg [Erythranthe guttata]                                   |
| c48161.graph_c4 | 0.32271534    | 0.43071798    | 0.59901398    | 26.5593733     | 35.450509      | 38.5936601     | 2.621E-48 | 5.187908  | up        | PREDICTED: WD repeat-containing protein 44 [Sesamum indicum]                                     |
| c48162.graph_c0 | 3.25757107    | 2.73334534    | 3.93986616    | 0.48546995     | 0.28052539     | 0.62831744     | 1.22E-16  | -3.849886 | down      | PREDICTED: aluminum-activated malate transporter 9-like [Sesamum indicum]                        |
| c48163.graph_c0 | 2.00399786    | 3.26400743    | 2.66251208    | 2.31558987     | 1.88953974     | 2.00471151     | 0.0001711 | -1.367587 | down      | PREDICTED: uncharacterized aarF domain-containing protein kinase 1 [Sesamum indicum]             |
| c48166.graph_c0 | 68.3290786    | 69.0716222    | 64.9055587    | 60.0857072     | 64.3107853     | 67.7747306     | 1.237E-14 | -1.092665 | down      | PREDICTED: uroporphyrinogen decarboxylase 1, chloroplastic isoform X2 [Sesamum indicum]          |
| c48168.graph_c0 | 21.9666424    | 21.6329401    | 21.2955392    | 106.036472     | 123.934935     | 121.916989     | 3.227E-24 | 1.418971  | up        | PREDICTED: dnaJ protein ERDJ3B [Sesamum indicum]                                                 |
| c48169.graph_c0 | 2.37666436    | 2.60973943    | 2.79497138    | 8.24062569     | 11.2884779     | 12.4333004     | 6.936E-06 | 1.013053  | up        | PREDICTED: GPI inositol-deacylase A isoform X1 [Sesamum indicum]                                 |
| c48175.graph_c2 | 35.2834311    | 32.6548165    | 35.412006     | 6.99933754     | 8.33658154     | 7.07243875     | 4.109E-84 | -3.225346 | down      | PREDICTED: transcription factor 1GA1-like [Sesamum indicum]                                      |
| c48181.graph_c0 | 48.6639999    | 47.3497024    | 47.9800816    | 10.2779641     | 13.0175829     | 11.9484673     | 1.469E-95 | -3.051744 | down      | PREDICTED: probable leucine-rich repeat receptor-like protein kinase At1g35710 [Sesamum indicum] |

| #ID             | 0 h-1<br>FPKM | 0 h-2<br>FPKM | 0 h-3<br>FPKM | 48 h-1<br>FPKM | 48 h-2<br>FPKM | 48 h-3<br>FPKM | FDR       | log2FC    | regulated | nr_annotation                                                                       |
|-----------------|---------------|---------------|---------------|----------------|----------------|----------------|-----------|-----------|-----------|-------------------------------------------------------------------------------------|
| c48187.graph_c1 | 2.00113514    | 2.12381       | 2.10680212    | 40.6919473     | 43.8611654     | 45.9708126     | 1.47E-87  | 3.369002  | up        | PREDICTED: protein IQ-DOMAIN 31-like isoform X1 [Sesamum indicum]                   |
| c48188.graph_c0 | 31.15958      | 30.3344349    | 29.3016016    | 14.6714033     | 13.1983418     | 10.7888648     | 3.209E-49 | -2.245017 | down      | PREDICTED: nitronate monooxygenase [Sesamum indicum]                                |
| c48194.graph_c2 | 0.03798607    | 0.07604822    | 0.09762721    | 1.46980033     | 1.92780742     | 2.8336089      | 7.651E-08 | 3.847456  | up        | PREDICTED: 125 kDa kinesin-related protein [Sesamum indicum]                        |
| c48195.graph_c0 | 0.30643743    | 0.15337214    | 0.06563071    | 1.92911937     | 2.14335918     | 1.46532094     | 7.351E-05 | 2.392584  | up        | hypothetical protein VITISV_040416 [Vitis vinifera]                                 |
| c48196.graph_c0 | 11.050566     | 8.74808766    | 10.4878881    | 11.1785907     | 9.93912469     | 9.23616827     | 0.0001845 | -1.011572 | down      | hypothetical protein MIMGU_mgv1a003019mg [Erythranthe guttata]                      |
| c48197.graph_c0 | 0             | 0             | 0             | 3.59371958     | 4.75888767     | 2.03488096     | 1.484E-07 | Inf       | up        | Heat Shock Protein 70 [Ostreococcus lucimarinus CCE9901]                            |
| c48200.graph_c0 | 0             | 0             | 0             | 1.54625292     | 4.50468555     | 2.30945671     | 1.457E-05 | Inf       | up        | hypothetical protein EMIHUDDRAFT_225441 [Emiliania huxleyi CCMP1516]                |
| c48202.graph_c0 | 3.2066345     | 3.30026364    | 2.90186781    | 50.0959108     | 40.3759281     | 35.7266726     | 2.097E-14 | 2.734642  | up        | hypothetical protein MIMGU_mgv1a010335mg [Erythranthe guttata]                      |
| c48203.graph_c1 | 4.53447169    | 3.53565167    | 3.98687808    | 20.9312286     | 22.5467726     | 23.8675076     | 7.503E-11 | 1.462967  | up        | Hypothetical protein [Arabidopsis thaliana]                                         |
| c48205.graph_c0 | 8.51564998    | 7.11107824    | 7.43184127    | 4.23723204     | 3.28884835     | 4.33020373     | 3.497E-13 | -1.973623 | down      | PREDICTED: uncharacterized protein LOC105167185 isoform X1 [Sesamum indicum]        |
| c48208.graph_c0 | 0             | 0             | 0             | 28.0712845     | 45.3481663     | 22.1562633     | 4.142E-16 | Inf       | up        | PREDICTED: 40S ribosomal protein S15-1-like [Cameina reticulata]                    |
| c48210.graph_c1 | 9.16181657    | 9.92822852    | 11.1252256    | 5.03330363     | 4.51184028     | 5.51212714     | 4.251E-10 | -2.023597 | down      | -                                                                                   |
| c48211.graph_c0 | 0.50948854    | 0.35999909    | 0.23107516    | 7.37193396     | 6.31793539     | 6.24012598     | 1.019E-15 | 3.171111  | up        | PREDICTED: wall-associated receptor kinase-like 2 [Sesamum indicum]                 |
| c48212.graph_c0 | 53.8124509    | 59.4094277    | 57.3868298    | 51.4680499     | 54.524158      | 47.8459804     | 2.424E-16 | -1.167142 | down      | PREDICTED: putative late blight resistance protein homolog R1A-10 [Sesamum indicum] |
| c48213.graph_c0 | 17.6485428    | 19.7836098    | 17.3081469    | 16.165074      | 14.1775067     | 13.986653      | 6.725E-21 | -1.318393 | down      | PREDICTED: probable ATP-dependent DNA helicase CHR12 [Sesamum indicum]              |
| c48215.graph_c0 | 2.44028257    | 1.35129531    | 1.80145133    | 0              | 0              | 0              | 1.447E-19 | -Inf      | down      | --                                                                                  |
| c48219.graph_c0 | 24.9993548    | 26.5097389    | 24.4332208    | 16.3348899     | 15.4884411     | 15.5242825     | 9.779E-31 | -1.697527 | down      | PREDICTED: transmembrane protein 45B-like [Sesamum indicum]                         |
| c48220.graph_c0 | 1.77918022    | 3.49831782    | 1.55142941    | 0.11707835     | 0              | 0.10417561     | 7.966E-08 | -5.941561 | down      | hypothetical protein VITISV_010987 [Vitis vinifera]                                 |
| c48221.graph_c0 | 36.4775065    | 39.4000221    | 37.0087301    | 8.69007125     | 14.3749371     | 15.4133684     | 1.384E-65 | -2.579275 | down      | hypothetical protein MIMGU_mgv1a025040mg, partial [Erythranthe guttata]             |
| c48222.graph_c0 | 15.1128631    | 14.33699      | 14.8510681    | 12.5352097     | 9.68851716     | 7.87442902     | 8.792E-23 | -1.568193 | down      | hypothetical protein MIMGU_mgv1a001261mg [Erythranthe guttata]                      |
| c48223.graph_c0 | 6.10230826    | 4.32679665    | 5.88128078    | 2.8109222      | 2.48152602     | 1.66742778     | 1.32E-06  | -2.241426 | down      | -                                                                                   |
| c48223.graph_c1 | 0.0411732     | 0.20607214    | 0.15872757    | 4.02073224     | 4.82205087     | 5.973956       | 2.801E-14 | 4.162562  | up        | PREDICTED: uncharacterized protein LOC100255010 isoform X5 [Vitis vinifera]         |
| c48224.graph_c0 | 573.009602    | 567.068485    | 517.664962    | 468.578701     | 425.84796      | 349.954424     | 7.584E-15 | -1.426737 | down      | -                                                                                   |

| #ID             | 0 h-1<br>FPKM | 0 h-2<br>FPKM | 0 h-3<br>FPKM | 48 h-1<br>FPKM | 48 h-2<br>FPKM | 48 h-3<br>FPKM | FDR       | log2FC    | regulated | nr_annotation                                                                                              |
|-----------------|---------------|---------------|---------------|----------------|----------------|----------------|-----------|-----------|-----------|------------------------------------------------------------------------------------------------------------|
| c48226.graph_c1 | 7.03031564    | 8.2179644     | 5.97329283    | 7.13724698     | 6.68080636     | 6.76773899     | 9.448E-09 | -1.057817 | down      | PREDICTED: pentatricopeptide repeat-containing protein At1g06270 isoform X2 [Sesamum indicum]              |
| c48231.graph_c0 | 68.1693603    | 69.4663903    | 74.6127635    | 31.0617637     | 27.155579      | 25.0222981     | 6.958E-60 | -2.365425 | down      | PREDICTED: putative lysine-specific demethylase JMJD5 [Sesamum indicum]                                    |
| c48235.graph_c0 | 1.13225851    | 0.89574553    | 0.96217545    | 6.54467651     | 6.75505747     | 6.8862991      | 4.014E-11 | 1.737826  | up        | PREDICTED: pentatricopeptide repeat-containing protein At1g19720 isoform X1 [Sesamum indicum]              |
| c48237.graph_c0 | 2.62342209    | 2.1224232     | 2.90939286    | 9.56814684     | 12.1705644     | 9.42691158     | 0.0001552 | 1.003223  | up        | PREDICTED: BTB/POZ domain-containing protein At1g55760 [Sesamum indicum]                                   |
| c48238.graph_c0 | 0             | 0             | 0             | 6.40608403     | 10.5420882     | 1.21749603     | 0.000316  | Inf       | up        | -                                                                                                          |
| c48239.graph_c2 | 0.38343273    | 0.47977086    | 0.49272624    | 2.29608109     | 2.80663788     | 2.4752205      | 0.0042576 | 1.460388  | up        | -                                                                                                          |
| c48239.graph_c3 | 5507.69182    | 5503.88487    | 5444.07256    | 70.8422421     | 93.7460357     | 78.8482798     | 3.98E-217 | -7.100241 | down      | PREDICTED: beta-hexosaminidase 2 [Sesamum indicum]                                                         |
| c48239.graph_c5 | 125.71397     | 116.522349    | 113.908123    | 405.996364     | 506.695621     | 547.887414     | 2.645E-11 | 1.014702  | up        | PREDICTED: beta-hexosaminidase 2 [Sesamum indicum]                                                         |
| c48239.graph_c6 | 79.6979073    | 80.0794895    | 73.5143895    | 42.6050631     | 42.1925972     | 39.6989495     | 1.343E-37 | -1.921895 | down      | PREDICTED: putative transcription elongation factor SPT5 homolog 1 [Sesamum indicum]                       |
| c48244.graph_c0 | 21.9910376    | 21.0604066    | 21.9261139    | 20.1343258     | 21.197187      | 21.3981784     | 6.191E-12 | -1.069402 | down      | hypothetical protein MIMGU_mgv1a007762mg [Erythranthe guttata]                                             |
| c48244.graph_c1 | 0             | 0             | 0             | 1735.48337     | 1713.00518     | 2250.82956     | 1.04E-181 | Inf       | up        | PREDICTED: putative mannan endo-1,4-beta-mannosidase 9 [Sesamum indicum]                                   |
| c48244.graph_c2 | 2586.72989    | 2714.42794    | 2573.21681    | 553.813235     | 547.352286     | 534.486715     | 5.803E-46 | -3.284055 | down      | PREDICTED: heat shock cognate 70 kDa protein 2 [Sesamum indicum]                                           |
| c48245.graph_c0 | 6.666108      | 6.59801802    | 7.10251809    | 1.2901793      | 1.93172779     | 2.05108223     | 2.12E-46  | -2.9753   | down      | PREDICTED: putative pentatricopeptide repeat-containing protein At3g16890, mitochondrial [Sesamum indicum] |
| c48249.graph_c0 | 2.50763188    | 2.02994164    | 1.90542282    | 1.7376677      | 1.69187785     | 1.92153611     | 3.554E-08 | -1.283613 | down      | hypothetical protein MIMGU_mgv1a022404mg [Erythranthe guttata]                                             |
| c48250.graph_c2 | 46.6439445    | 42.8995301    | 42.008751     | 14.1860857     | 16.4875093     | 18.5459643     | 4.686E-55 | -2.438622 | down      | hypothetical protein MIMGU_mgv1a010855mg [Erythranthe guttata]                                             |
| c48250.graph_c3 | 0.2846882     | 0.33246882    | 0.42680821    | 6.99395572     | 8.84478983     | 11.2795133     | 1.838E-16 | 3.671703  | up        | PREDICTED: probable pectin methyltransferase QUA2 [Sesamum indicum]                                        |
| c48251.graph_c0 | 1.45375946    | 1.9029737     | 1.50888107    | 0.30906878     | 0.43656119     | 0.50418049     | 1.104E-08 | -2.984838 | down      | PREDICTED: uncharacterized protein LOC104593668 [Nelumbo nucifera]                                         |
| c48251.graph_c1 | 9.88542567    | 9.74070998    | 8.73342481    | 2.84596841     | 5.92941826     | 7.89241471     | 4.185E-12 | -1.796486 | down      | hypothetical protein Csa_6G486800 [Cucumis sativus]                                                        |
| c48253.graph_c0 | 2.99646679    | 3.15133906    | 3.16819746    | 1.08325013     | 2.7393658      | 3.35799679     | 0.0001184 | -1.408944 | down      | PREDICTED: serine/threonine-protein kinase-like protein At3g51990 [Sesamum indicum]                        |
| c48253.graph_c1 | 5.06731958    | 6.01172591    | 4.52201825    | 42.1015587     | 50.2568196     | 47.4425297     | 2.495E-44 | 2.145166  | up        | PREDICTED: uncharacterized protein LOC105168293 [Sesamum indicum]                                          |
| c48253.graph_c2 | 28.369835     | 24.9372072    | 26.8865664    | 0.32670178     | 0              | 0              | 5.23E-116 | -8.899607 | down      | -                                                                                                          |

| #ID             | 0 h-1<br>FPKM | 0 h-2<br>FPKM | 0 h-3<br>FPKM | 48 h-1<br>FPKM | 48 h-2<br>FPKM | 48 h-3<br>FPKM | FDR       | log2FC    | regulated | nr_annotation                                                                                  |
|-----------------|---------------|---------------|---------------|----------------|----------------|----------------|-----------|-----------|-----------|------------------------------------------------------------------------------------------------|
| c48256.graph_c0 | 87.7635569    | 89.0117409    | 89.2813527    | 49.0351494     | 48.4836753     | 44.6589378     | 3.451E-40 | -1.920732 | down      | PREDICTED: uncharacterized protein LOC105170589 [Sesamum indicum]                              |
| c48257.graph_c0 | 2.59611333    | 2.41130576    | 2.38980843    | 9.84280214     | 10.8170593     | 11.0294338     | 3.447E-10 | 1.080202  | up        | PREDICTED: protein SHOOT GRAVITROPISM 6 [Sesamum indicum]                                      |
| c48258.graph_c1 | 180.188273    | 192.747522    | 186.461088    | 38.5311924     | 31.6533252     | 28.7619543     | 2.86E-113 | -3.511953 | down      | PREDICTED: pentatricopeptide repeat-containing protein At1g79540 [Sesamum indicum]             |
| c48259.graph_c1 | 82.9022101    | 79.572592     | 86.6579304    | 514.170998     | 675.196542     | 671.434063     | 7.172E-28 | 1.877875  | up        | PREDICTED: dehydrololichyl diphosphate synthase 6 [Sesamum indicum]                            |
| c48263.graph_c0 | 1.49969698    | 1.02713595    | 1.82573999    | 5.23560761     | 6.00869903     | 8.54078897     | 0.0075419 | 1.158079  | up        | PREDICTED: hsp70-Hsp90 organizing protein 3-like [Sesamum indicum]                             |
| c48264.graph_c0 | 50.9217011    | 50.0028489    | 48.4607675    | 15.1396744     | 17.1297138     | 16.754985      | 1.004E-73 | -2.626599 | down      | PREDICTED: phytoosmokin receptor 1 [Sesamum indicum]                                           |
| c48265.graph_c0 | 0.17151973    | 0.26534138    | 0.28052137    | 3.9647441      | 4.35234554     | 3.96239019     | 5.399E-18 | 3.075395  | up        | PREDICTED: osmotic avoidance abnormal protein 3-like [Sesamum indicum]                         |
| c48267.graph_c0 | 0.36827736    | 0.12288205    | 0.15775033    | 1.2440308      | 2.27637236     | 1.71071174     | 0.0005538 | 1.990866  | up        | hypothetical protein MIMGU_mgv1a013848mg [Erythranthe guttata]                                 |
| c48268.graph_c0 | 1.99837233    | 0.75014002    | 0.49384376    | 0              | 0              | 0              | 9.745E-06 | -Inf      | down      | PREDICTED: BAG family molecular chaperone regulator 6-like [Phoenix dactylifera]               |
| c48270.graph_c0 | 6.5982191     | 6.36216899    | 5.72403673    | 6.0577728      | 5.41197263     | 5.24734273     | 1.183E-15 | -1.174062 | down      | PREDICTED: calcium-transporting ATPase 1, chloroplastic [Sesamum indicum]                      |
| c48272.graph_c0 | 1.12104021    | 1.2871867     | 1.31347096    | 4.92087084     | 6.11408971     | 5.40563121     | 0.0014262 | 1.121415  | up        | PREDICTED: uncharacterized protein LOC105162718 [Sesamum indicum]                              |
| c48274.graph_c0 | 1.73625584    | 1.74833965    | 1.59368393    | 9.11173446     | 11.0648874     | 12.0808672     | 3.403E-22 | 1.646493  | up        | PREDICTED: aminomethyltransferase, mitochondrial [Eucalyptus grandis]                          |
| c48275.graph_c0 | 64.1686189    | 58.9482889    | 62.3491818    | 745.988864     | 842.422438     | 864.90828      | 3.896E-73 | 2.705584  | up        | PREDICTED: actin-1-like [Tarenaya hassleriana]                                                 |
| c48277.graph_c0 | 2.61766503    | 2.47196814    | 2.22137947    | 14.4238814     | 15.8587894     | 16.0732187     | 5.197E-09 | 1.646831  | up        | PREDICTED: histone deacetylase 5 [Sesamum indicum]                                             |
| c48278.graph_c0 | 23.6692639    | 24.3387699    | 23.7835043    | 7.61526796     | 9.68094361     | 9.12283619     | 1.185E-47 | -2.463658 | down      | G patch domain-containing protein 8 [Glycine soja]                                             |
| c48280.graph_c0 | 0.89800829    | 0.91653315    | 1.24448415    | 12.052681      | 15.432008      | 18.027967      | 1.545E-21 | 2.868409  | up        | PREDICTED: LRR receptor-like serine/threonine-protein kinase ERL2 isoform X2 [Sesamum indicum] |
| c48283.graph_c1 | 15.1411206    | 15.9848716    | 15.2907611    | 8.83329984     | 9.96371146     | 11.5635438     | 8.287E-21 | -1.633153 | down      | PREDICTED: probable mitochondrial chaperone BCS1-B [Sesamum indicum]                           |
| c48284.graph_c0 | 0             | 0             | 0             | 0.92045892     | 0.79782105     | 0.78179068     | 3.251E-09 | Inf       | up        | Annexin-like protein RJ4 isoform 2 [Theobroma cacao]                                           |
| c48286.graph_c0 | 1.3564722     | 1.07312411    | 0.7872157     | 8.14301533     | 11.2529336     | 13.7738254     | 1.643E-09 | 2.346292  | up        | PREDICTED: uncharacterized protein LOC105179489 [Sesamum indicum]                              |
| c48287.graph_c0 | 8.18102663    | 9.46046924    | 9.75388585    | 38.0926118     | 42.3722284     | 45.5639956     | 5.414E-15 | 1.180428  | up        | PREDICTED: uncharacterized protein LOC105157447 [Sesamum indicum]                              |
| c48288.graph_c0 | 5.892378      | 6.06183544    | 5.24917783    | 31.7521576     | 38.7106034     | 38.3150894     | 3.888E-31 | 1.640904  | up        | GIGANTEA family protein [Populus trichocarpa]                                                  |

| #ID             | 0 h-1<br>FPKM | 0 h-2<br>FPKM | 0 h-3<br>FPKM | 48 h-1<br>FPKM | 48 h-2<br>FPKM | 48 h-3<br>FPKM | FDR       | log2FC    | regulated | nr_annotation                                                                         |
|-----------------|---------------|---------------|---------------|----------------|----------------|----------------|-----------|-----------|-----------|---------------------------------------------------------------------------------------|
| c48291.graph_c1 | 7.70223242    | 6.36908503    | 8.00420561    | 40.1066894     | 44.5145333     | 48.2593868     | 5.258E-16 | 1.568456  | up        | PREDICTED: pyridoxal reductase, chloroplastic [Sesamum indicum]                       |
| c48293.graph_c0 | 25.2260864    | 22.4793291    | 24.0760773    | 325.219307     | 367.735602     | 354.393838     | 9.392E-78 | 2.847584  | up        | PREDICTED: apyrase 2-like [Sesamum indicum]                                           |
| c48294.graph_c0 | 0             | 0             | 0             | 1.65185814     | 1.37495553     | 0.97987562     | 2.241E-10 | Inf       | up        | --                                                                                    |
| c48295.graph_c0 | 0.27826821    | 0.37853803    | 0.33007908    | 2.2217765      | 2.36763004     | 3.08236277     | 8.59E-13  | 1.937373  | up        | PREDICTED: phragmoplast orienting kinesin 2 [Sesamum indicum]                         |
| c48296.graph_c0 | 0             | 0             | 0             | 2.01873812     | 1.68033505     | 2.82269592     | 2.289E-11 | Inf       | up        | nypouneuca protein CHLNDKAR_1_48/04 [Cnidoscolus variabilis]                          |
| c48297.graph_c0 | 0             | 0             | 0             | 1.11836737     | 0.90832721     | 0.7629227      | 2.117E-11 | Inf       | up        | hypothetical protein DI09_7p140 [Microsporidia sp. UGP3]                              |
| c48300.graph_c0 | 8.19241125    | 8.48339453    | 7.6616274     | 2.65733651     | 2.64099432     | 3.25420983     | 1.002E-47 | -2.52687  | down      | hypothetical protein MIMGU_mgv1a0002422mg, partial [Erythranthe guttata]              |
| c48302.graph_c0 | 16.7475409    | 16.4509594    | 18.1019886    | 404.252308     | 448.649459     | 439.37828      | 1.55E-128 | 3.634622  | up        | hypothetical protein MIMGU_mgv1a010747mg [Erythranthe guttata]                        |
| c48303.graph_c0 | 2.40777323    | 2.29894498    | 2.23726069    | 9.72594398     | 12.36415       | 13.087408      | 8.968E-07 | 1.319175  | up        | PREDICTED: altered inheritance rate of mitochondria protein 25 [Sesamum indicum]      |
| c48303.graph_c3 | 38.8734828    | 46.5924893    | 44.0383634    | 14.6078477     | 9.23522585     | 13.9413764     | 7.222E-40 | -2.789796 | down      | hexose transport protein [Actinidia deliciosa]                                        |
| c48305.graph_c0 | 0             | 0             | 0             | 3.87450972     | 11.1097116     | 2.06850927     | 0.0006534 | Inf       | up        | predicted protein [Physcomitrella patens]                                             |
| c48309.graph_c0 | 5.07675099    | 3.23389474    | 4.27014066    | 32.2290171     | 34.0526492     | 38.8163488     | 2.2E-14   | 2.043358  | up        | PREDICTED: hydroquinone glucosyltransferase [Sesamum indicum]                         |
| c48309.graph_c1 | 2.60754843    | 2.28388956    | 2.42002437    | 12.1113119     | 16.0822651     | 13.9828255     | 1.574E-09 | 1.506788  | up        | unnamed protein product [Coffea canephora]                                            |
| c48309.graph_c3 | 2.9383954     | 2.36081057    | 2.90649124    | 1.99466216     | 2.92438319     | 2.99503979     | 9.305E-05 | -1.077373 | down      | PREDICTED: aluminum-activated malate transporter 4-like [Sesamum indicum]             |
| c48309.graph_c4 | 1.80555066    | 1.80735864    | 1.842515      | 16.5360638     | 16.0149347     | 14.496032      | 4.917E-12 | 2.092104  | up        | PREDICTED: hydroquinone glucosyltransferase [Sesamum indicum]                         |
| c48309.graph_c5 | 97.5959066    | 95.2622035    | 98.7630002    | 94.3872182     | 94.8858478     | 92.8431905     | 1.155E-13 | -1.065378 | down      | PREDICTED: transmembrane protein 53-A-like [Sesamum indicum]                          |
| c48311.graph_c0 | 6.94288388    | 7.82352981    | 7.03554018    | 55.0441923     | 66.3277322     | 66.9626056     | 1.215E-39 | 2.090115  | up        | cytochrome P450 CYP72A219-like [Sesamum indicum]                                      |
| c48316.graph_c1 | 0.08012273    | 0.18714024    | 0.13728118    | 0.63972381     | 0.91230166     | 0.83194043     | 0.0050513 | 1.534146  | up        | PREDICTED: probable inactive receptor kinase At5g10020 [Nicotiana glauca]             |
| c48322.graph_c0 | 0.2050895     | 0.20529486    | 0             | 0.99869248     | 1.80144854     | 2.35367014     | 0.000573  | 2.63806   | up        | PREDICTED: uncharacterized acetyltransferase At3g50280-like [Sesamum indicum]         |
| c48322.graph_c3 | 0.04049302    | 0             | 0.05203513    | 1.52949721     | 7.31118571     | 7.66772059     | 3.657E-05 | 6.431477  | up        | PREDICTED: omega-hydroxypalmitate O-feruloyl transferase isoform X1 [Sesamum indicum] |
| c48327.graph_c0 | 0.20547194    | 0.08227108    | 0.07921187    | 1.17362375     | 1.14304496     | 1.73485784     | 6.352E-06 | 2.451806  | up        | hypothetical protein MIMGU_mgv1a001429mg [Erythranthe guttata]                        |
| c48331.graph_c0 | 62.6073514    | 62.6990035    | 62.9979121    | 11.9540536     | 13.1862373     | 14.0280391     | 1.94E-105 | -3.285116 | down      | PREDICTED: uncharacterized protein LOC105164372 [Sesamum indicum]                     |

| #ID             | 0 h-1<br>FPKM | 0 h-2<br>FPKM | 0 h-3<br>FPKM | 48 h-1<br>FPKM | 48 h-2<br>FPKM | 48 h-3<br>FPKM | FDR       | log2FC    | regulated | nr_annotation                                                                                           |
|-----------------|---------------|---------------|---------------|----------------|----------------|----------------|-----------|-----------|-----------|---------------------------------------------------------------------------------------------------------|
| c48332.graph_c0 | 5.41716349    | 5.2289241     | 5.86735577    | 48.0527755     | 61.4989361     | 65.6105347     | 3.62E-31  | 2.383515  | up        | PREDICTED: probable copper-transporting ATPase HMA5 [Sesamum indicum]                                   |
| c48334.graph_c1 | 4.16459769    | 4.73402457    | 6.07732348    | 24.4833421     | 25.3860112     | 26.7902137     | 1.153E-13 | 1.333551  | up        | PREDICTED: 3-hydroxyisobutyryl-CoA hydrolase-like protein 1, mitochondrial isoform X2 [Sesamum indicum] |
| c48336.graph_c0 | 11.0866325    | 12.4591662    | 10.1157304    | 10.5934215     | 10.6190883     | 10.3381527     | 1.417E-08 | -1.109263 | down      | PREDICTED: pentatricopeptide repeat-containing protein At2g21090-like [Sesamum indicum]                 |
| c48336.graph_c2 | 3.95123763    | 3.41063847    | 3.56896513    | 1.92558015     | 2.01197459     | 2.37055252     | 3.037E-09 | -1.81209  | down      | PREDICTED: ABC transporter G family member 5 [Sesamum indicum]                                          |
| c48336.graph_c3 | 2.06430917    | 1.52259304    | 1.25655111    | 1.03429937     | 1.37847986     | 0.65312561     | 8.646E-05 | -1.673991 | down      | PREDICTED: pentatricopeptide repeat-containing protein At2g13600 [Sesamum indicum]                      |
| c48336.graph_c4 | 5.65315089    | 6.75679005    | 6.18026559    | 28.2167557     | 31.5117368     | 32.7153115     | 1.728E-15 | 1.294002  | up        | hypothetical protein MIMGU_mgv1a004418mg [Erythranthe guttata]                                          |
| c48340.graph_c0 | 81.3504491    | 87.2309412    | 81.811064     | 45.3230107     | 46.7577869     | 43.8207354     | 1.136E-40 | -1.898941 | down      | PREDICTED: serine/threonine-protein kinase PBS1 [Sesamum indicum]                                       |
| c48340.graph_c3 | 140.626259    | 152.314374    | 135.124054    | 132.404059     | 131.857419     | 119.850529     | 1.11E-15  | -1.172165 | down      | hypothetical protein MIMGU_mgv1a000810mg [Erythranthe guttata]                                          |
| c48344.graph_c0 | 0.96360532    | 0.88418937    | 1.13508174    | 8.43349267     | 10.2665652     | 11.9143584     | 9.344E-08 | 2.335081  | up        | PREDICTED: uncharacterized protein LOC105167681 [Sesamum indicum]                                       |
| c48346.graph_c0 | 17.9901654    | 17.0281429    | 17.4115724    | 15.3818238     | 17.421336      | 15.721738      | 6.461E-15 | -1.130562 | down      | PREDICTED: sec1 family domain-containing protein MIP3 [Sesamum indicum]                                 |
| c48347.graph_c1 | 1.67334669    | 1.82067641    | 1.68285659    | 7.57392876     | 11.3609333     | 9.95975625     | 0.0002757 | 1.456989  | up        | PREDICTED: sulfhydryl oxidase 2 isoform X3 [Sesamum indicum]                                            |
| c48347.graph_c4 | 3.68510194    | 3.50435241    | 3.39377635    | 13.4666598     | 14.6858901     | 16.3627299     | 0.0003681 | 1.053337  | up        | PREDICTED: sulfhydryl oxidase 2 isoform X1 [Sesamum indicum]                                            |
| c48348.graph_c0 | 523.793944    | 520.219895    | 501.906429    | 584.593556     | 349.963704     | 243.526987     | 1.509E-08 | -1.395367 | down      | PREDICTED: uncharacterized protein LOC105164444 [Sesamum indicum]                                       |
| c48351.graph_c0 | 0.40058979    | 0.86881367    | 0.3431825     | 3.19842854     | 5.47348396     | 5.52769598     | 4.785E-05 | 2.1161    | up        | -                                                                                                       |
| c48354.graph_c0 | 1.17986169    | 0.81196716    | 1.08974645    | 5.80847212     | 8.6003268      | 9.24861479     | 2.449E-08 | 1.91518   | up        | PREDICTED: uncharacterized protein LOC105158848 isoform X1 [Sesamum indicum]                            |
| c48360.graph_c0 | 0.14221097    | 0.14235338    | 0             | 3.27535061     | 3.60863029     | 3.06982126     | 2.31E-10  | 4.126809  | up        | hypothetical protein MIMGU_mgv1a011575mg [Erythranthe guttata]                                          |
| c48361.graph_c0 | 21.6718372    | 20.3474745    | 21.9417693    | 21.3195922     | 20.3574915     | 20.0210879     | 3.511E-12 | -1.068726 | down      | PREDICTED: protein                                                                                      |
| c48364.graph_c0 | 0             | 0             | 0             | 19.5447905     | 35.3521969     | 13.5324199     | 5.382E-11 | Inf       | up        | TRIGALACTOSYLDIACYLGLYCEROL 3, chloroplastic isoform X1 [Sesamum indicum]                               |
| c48368.graph_c0 | 50.6210105    | 48.2156127    | 48.397202     | 36.7596499     | 38.9888901     | 38.6058119     | 9.827E-23 | -1.382764 | down      | predicted protein [Physcomitrella patens]                                                               |
|                 |               |               |               |                |                |                |           |           |           | PREDICTED: protein strawberry notch isoform X1 [Sesamum indicum]                                        |

| #ID             | 0 h-1<br>FPKM | 0 h-2<br>FPKM | 0 h-3<br>FPKM | 48 h-1<br>FPKM | 48 h-2<br>FPKM | 48 h-3<br>FPKM | FDR       | log2FC    | regulated | nr_annotation                                                                                    |
|-----------------|---------------|---------------|---------------|----------------|----------------|----------------|-----------|-----------|-----------|--------------------------------------------------------------------------------------------------|
| c48371.graph_c0 | 76.4087186    | 75.4317148    | 70.8348274    | 69.2291797     | 70.771997      | 71.4780923     | 1.089E-14 | -1.091571 | down      | PREDICTED: phosphatidylinositol N-acetylglucosaminyltransferase subunit A-like [Sesamum indicum] |
| c48372.graph_c0 | 10.5213438    | 9.1822564     | 10.1789313    | 49.0857995     | 47.3244065     | 44.6433239     | 4.371E-17 | 1.222478  | up        | PREDICTED: acyl-CoA-binding domain-containing protein 4-like [Sesamum indicum]                   |
| c48372.graph_c1 | 80.5995502    | 82.9509676    | 79.8214989    | 585.282165     | 563.976733     | 805.838171     | 8.652E-12 | 1.986561  | up        | PREDICTED: uncharacterized protein LOC105170680 isoform X1 [Sesamum indicum]                     |
| c48373.graph_c0 | 91.0589542    | 96.7124474    | 92.5211978    | 47.2841442     | 42.3360412     | 34.3834102     | 1.927E-52 | -2.190091 | down      | PREDICTED: uncharacterized protein LOC105162592 [Sesamum indicum]                                |
| c48374.graph_c0 | 0             | 0             | 0             | 27.1350735     | 31.2368236     | 23.6837146     | 2.061E-77 | Inf       | up        | PREDICTED: GDSL esterase/lipase At1g29670-like [Sesamum indicum]                                 |
| c48377.graph_c0 | 0             | 0             | 0             | 2.61713301     | 2.60551489     | 2.13231205     | 1.177E-15 | Inf       | up        | -                                                                                                |
| c48384.graph_c0 | 0.90514359    | 0.78319572    | 0.94628774    | 4.70646009     | 5.39018786     | 3.73504692     | 6.329E-07 | 1.373751  | up        | PREDICTED: LOW QUALITY PROTEIN: probable serine/threonine-protein kinase GCN2 [Sesamum indicum]  |
| c48386.graph_c0 | 1102.79499    | 1085.33769    | 1175.1755     | 472.273636     | 473.192363     | 475.826646     | 1.97E-35  | -2.260938 | down      | PREDICTED: uncharacterized protein LOC105166153 [Sesamum indicum]                                |
| c48390.graph_c0 | 0             | 0.10518253    | 0.0450095     | 2.83958612     | 3.17911747     | 4.30678406     | 7.702E-15 | 5.079709  | up        | PREDICTED: 7-hydroxymethyl chlorophyll a reductase, chloroplastic isoform X1 [Sesamum indicum]   |
| c48392.graph_c0 | 0             | 0             | 0             | 2.1013812      | 3.23488668     | 2.24959874     | 1.525E-15 | Inf       | up        | hypothetical protein SELMODRAFT_168478 [Selaginella moellendorffii]                              |
| c48395.graph_c0 | 0.95892001    | 0.93854955    | 1.01318348    | 6.06614834     | 6.11438994     | 5.67711085     | 4.698E-08 | 1.599434  | up        | PREDICTED: protein FAM135B-like [Sesamum indicum]                                                |
| c48398.graph_c0 | 4.69575535    | 4.625847      | 6.13001299    | 16.5488048     | 25.5333596     | 29.1445555     | 0.0004348 | 1.175605  | up        | hypothetical protein MIMGU_mgv1a027078mg [Erythranthe guttata]                                   |
| c48399.graph_c0 | 37.3037488    | 37.7549821    | 35.5393473    | 216.611449     | 202.706133     | 222.640936     | 1.582E-27 | 1.520849  | up        | PREDICTED: uncharacterized protein LOC105163762 isoform X1 [Sesamum indicum]                     |
| c48400.graph_c0 | 3.17388977    | 1.96335659    | 1.87889365    | 0              | 0              | 0              | 2.893E-26 | -Inf      | down      | lectin [Bryopsis plumosa]                                                                        |
| c48404.graph_c0 | 12.1733976    | 5.50316851    | 5.92931452    | 0              | 0              | 0              | 5.907E-14 | -Inf      | down      | PREDICTED: BTB/POZ and TAZ domain-containing protein 1-like [Phoenix dactylifera]                |
| c48409.graph_c2 | 2.03328549    | 1.50666658    | 1.59485793    | 0.24327211     | 0.18040211     | 0.43292411     | 4.695E-15 | -3.602021 | down      | PREDICTED: subtilisin-like protease SDD1 [Sesamum indicum]                                       |
| c48410.graph_c0 | 28.4445447    | 30.4858485    | 29.365708     | 17.367064      | 19.8497198     | 18.8184529     | 1.528E-31 | -1.675654 | down      | PREDICTED: DNA polymerase eta [Sesamum indicum]                                                  |
| c48412.graph_c0 | 5.0552222     | 3.99496124    | 5.47045109    | 0.73534743     | 0.43278413     | 0.79970944     | 5.328E-15 | -3.898018 | down      | PREDICTED: auxin-induced protein 15A-like [Sesamum indicum]                                      |
| c48415.graph_c3 | 1.20581159    | 1.11761021    | 1.31995776    | 18.5556815     | 16.8243745     | 18.8903296     | 4.066E-24 | 2.879064  | up        | hypothetical protein MTR_4g125190 [Medicago truncatula]                                          |
| c48417.graph_c0 | 140.228979    | 140.396089    | 133.290965    | 50.5550624     | 53.9212915     | 55.7595429     | 8.776E-58 | -2.387491 | down      | PREDICTED: E3 ubiquitin-protein ligase UPL1-like [Sesamum indicum]                               |
| c48419.graph_c0 | 135.851885    | 127.64814     | 133.021202    | 110.330407     | 109.047496     | 102.537275     | 5.087E-20 | -1.317435 | down      | PREDICTED: asparagine--tRNA ligase, chloroplastic/mitochondrial [Sesamum indicum]                |
| c48420.graph_c1 | 0.98505564    | 1.23567292    | 0.6569526     | 7.11064505     | 8.05615095     | 7.16515905     | 5.249E-19 | 1.941942  | up        | PREDICTED: protein MON2 homolog isoform X2 [Sesamum indicum]                                     |



| #ID             | 0 h-1<br>FPKM | 0 h-2<br>FPKM | 0 h-3<br>FPKM | 48 h-1<br>FPKM | 48 h-2<br>FPKM | 48 h-3<br>FPKM | FDR       | log2FC    | regulated | nr_annotation                                                                                             |
|-----------------|---------------|---------------|---------------|----------------|----------------|----------------|-----------|-----------|-----------|-----------------------------------------------------------------------------------------------------------|
| c48421.graph_c2 | 26.7137185    | 26.9526942    | 26.5362326    | 13.9459046     | 15.8499721     | 12.9651269     | 9.9E-33   | -1.925682 | down      | PREDICTED: peptide chain release factor PrfB1, chloroplastic [Sesamum indicum]                            |
| c48422.graph_c0 | 3.24039605    | 2.90114458    | 3.02603947    | 16.1315519     | 17.6394276     | 16.6800565     | 5.356E-16 | 1.441895  | up        | PREDICTED: myosin-1 [Sesamum indicum]                                                                     |
| c48428.graph_c0 | 0             | 0             | 0.09659047    | 25.2059943     | 44.3088668     | 29.0210301     | 9.429E-24 | 8.937015  | up        | hypoteucal protein MGL_1450 [Miaiassezia globosa CBS 70661]                                               |
| c48429.graph_c0 | 28.010976     | 29.3651948    | 25.7533319    | 18.1723684     | 19.415612      | 19.7035459     | 9.392E-28 | -1.554753 | down      | PREDICTED: uncharacterized protein LOC105159568 [Sesamum indicum]                                         |
| c48430.graph_c0 | 43.6533389    | 61.5389069    | 39.2730717    | 585.357052     | 346.014227     | 263.722847     | 0.0051348 | 2.046555  | up        | PREDICTED: atamine aminotransferase 2 [Sesamum indicum]                                                   |
| c48431.graph_c0 | 0.43342642    | 0.82433483    | 0.61266713    | 3.31419574     | 4.27240772     | 3.73060122     | 0.0006757 | 1.575136  | up        | PREDICTED: urease accessory protein D isoform X1 [Sesamum indicum]                                        |
| c48432.graph_c0 | 6.10234456    | 5.49143946    | 6.23775915    | 3.25103541     | 4.03062381     | 3.94121637     | 4.624E-20 | -1.689914 | down      | PREDICTED: uncharacterized protein LOC105165127 isoform X1 [Sesamum indicum]                              |
| c48432.graph_c1 | 0.4284572     | 0.38989658    | 0.55058446    | 2.69129125     | 2.31889202     | 2.04347287     | 0.0058675 | 1.348627  | up        | PREDICTED: uncharacterized protein LOC105156326 [Sesamum indicum]                                         |
| c48435.graph_c0 | 0             | 0             | 0             | 28.8701767     | 55.5296874     | 28.4189586     | 1.537E-16 | Inf       | up        | 60s ribosomal protein I10 [Lichtheimia corymbifera JMRC:FSU:9682]                                         |
| c48436.graph_c0 | 0             | 0             | 0             | 1.10175695     | 2.33435579     | 1.19345339     | 3.133E-06 | Inf       | up        | -                                                                                                         |
| c48437.graph_c0 | 52.1613896    | 54.9147417    | 49.9702234    | 24.6154328     | 22.3383345     | 21.2311667     | 8.619E-55 | -2.218097 | down      | PREDICTED: uncharacterized protein LOC105158158 [Sesamum indicum]                                         |
| c48443.graph_c2 | 0.31996502    | 0             | 0.41116772    | 1.22120098     | 1.3383252      | 2.06082589     | 0.0060113 | 1.628099  | up        | hypoteucal protein CICLE_V100510/0MG [Citrus clementina]                                                  |
| c48450.graph_c1 | 28.2379813    | 29.6384057    | 26.6675958    | 15.1651581     | 14.227578      | 12.0086618     | 1.856E-47 | -2.04407  | down      | PREDICTED: uncharacterized protein LOC105178025 [Sesamum indicum]                                         |
| c48453.graph_c0 | 36.1283643    | 36.7912194    | 34.191268     | 27.4681516     | 30.9067363     | 31.5616012     | 2.901E-19 | -1.271272 | down      | PREDICTED: uncharacterized protein LOC105172605 [Sesamum indicum]                                         |
| c48454.graph_c0 | 22.4617397    | 21.8653997    | 21.2823135    | 3.26735048     | 3.32375399     | 3.28957021     | 4.41E-135 | -3.748404 | down      | PREDICTED: DNA repair protein UVH5 [Sesamum indicum]                                                      |
| c48455.graph_c0 | 15.3308962    | 14.7329961    | 15.2076417    | 14.4266715     | 15.8520582     | 14.9925582     | 2.076E-12 | -1.018878 | down      | PREDICTED: probable inactive leucine-rich repeat receptor-like protein kinase At3g03770 [Sesamum indicum] |
| c48458.graph_c0 | 0             | 0             | 0             | 1.44094111     | 1.34226934     | 0.97265849     | 8.741E-13 | Inf       | up        | Inositol-3-phosphate synthase [Ectocarpus siliculosus]                                                    |
| c48459.graph_c1 | 17.1861742    | 16.1318925    | 13.9081467    | 12.0528215     | 13.2328121     | 12.9181816     | 6.694E-11 | -1.322874 | down      | PREDICTED: carboxyl-terminal-processing peptidase 1, chloroplastic [Sesamum indicum]                      |
| c48463.graph_c0 | 2.34722391    | 1.9509858     | 2.20834468    | 9.13234516     | 11.2290955     | 10.685652      | 6.524E-09 | 1.233541  | up        | PREDICTED: uncharacterized protein LOC105169809 [Sesamum indicum]                                         |
| c48464.graph_c0 | 0.8999303     | 0.40946884    | 0.10513146    | 5.27592859     | 6.30781888     | 5.70045158     | 2.737E-06 | 2.605447  | up        | PREDICTED: auxin response factor 8-like isoform X2 [Nicotiana tomentosiformis]                            |
| c48464.graph_c2 | 289.038472    | 267.831424    | 288.709742    | 97.0513576     | 98.4683361     | 100.910048     | 3.467E-64 | -2.530414 | down      | PREDICTED: probable LRR receptor-like serine/threonine-protein kinase At5g10290 [Sesamum indicum]         |
| c48465.graph_c0 | 1.93038801    | 2.35239079    | 1.79755436    | 38.8412727     | 41.1476187     | 46.0962635     | 2.187E-79 | 3.356236  | up        | PREDICTED: elongation factor G-1, chloroplastic [Sesamum indicum]                                         |

| #ID             | 0 h-1<br>FPKM | 0 h-2<br>FPKM | 0 h-3<br>FPKM | 48 h-1<br>FPKM | 48 h-2<br>FPKM | 48 h-3<br>FPKM | FDR       | log2FC    | regulated | nr_annotation                                                                                       |
|-----------------|---------------|---------------|---------------|----------------|----------------|----------------|-----------|-----------|-----------|-----------------------------------------------------------------------------------------------------|
| c48468.graph_c0 | 1.48522514    | 1.37658552    | 1.48444575    | 0.05067727     | 0.10737284     | 0.22546165     | 1.369E-13 | -4.535991 | down      | PREDICTED: scarecrow-like protein 21 [Sesamum indicum]                                              |
| c48469.graph_c2 | 168.329457    | 173.348289    | 155.66403     | 91.3684494     | 65.9597354     | 53.8167419     | 1.478E-51 | -2.244145 | down      | PREDICTED: rhomboid protein 2-like [Sesamum indicum]                                                |
| c48469.graph_c3 | 4.62646793    | 5.03658871    | 3.80821212    | 35.9439325     | 31.2220744     | 30.9340821     | 1.532E-22 | 1.852171  | up        | PREDICTED: probable ubiquitin-conjugating enzyme E2 24 [Sesamum indicum]                            |
| c48472.graph_c0 | 0             | 0             | 0             | 1.548987       | 1.8895948      | 1.16944912     | 2.297E-11 | Inf       | up        | PREDICTED: hydroxyacylglutathione hydrolase cytoplasmic [Sesamum indicum]                           |
| c48474.graph_c2 | 3.94079196    | 4.24639451    | 3.00865555    | 49.5458462     | 53.6868914     | 53.3207683     | 1.143E-70 | 2.789773  | up        | PREDICTED: LOW QUALITY PROTEIN: probable acyl-activating enzyme 16, chloroplastic [Sesamum indicum] |
| c48475.graph_c2 | 0.29560054    | 0.19726436    | 0.12661947    | 29.0481601     | 27.695703      | 31.5816542     | 9.189E-38 | 6.145187  | up        | PREDICTED: MADS-box protein SVP-like isoform X1 [Sesamum indicum]                                   |
| c48479.graph_c0 | 231.330674    | 244.350768    | 246.453848    | 223.079175     | 232.510525     | 216.310516     | 3.689E-11 | -1.122168 | down      | PREDICTED: noicness protein nomoiog [Sesamum indicum]                                               |
| c48479.graph_c1 | 2.41993983    | 2.11956765    | 1.63260221    | 9.25203661     | 13.5212235     | 12.299017      | 2.39E-05  | 1.486415  | up        | PREDICTED: dystrophin myotonia WD repeat-containing protein-like [Sesamum indicum]                  |
| c48480.graph_c0 | 0             | 0             | 0             | 38.8702467     | 43.2982575     | 30.9174279     | 3.528E-55 | Inf       | up        | hypothetical protein SELMODRAFT_270900 [Selaginella moellendorffii]                                 |
| c48482.graph_c0 | 0             | 0             | 0             | 1.56157677     | 1.34794915     | 1.28655705     | 4.124E-11 | Inf       | up        | hypothetical protein PHACADRAFT_263295 [Phanerochaete carnosae HHB-10118-sp]                        |
| c48484.graph_c0 | 26.3009618    | 24.5694197    | 24.4561556    | 15.4072223     | 19.1321129     | 20.6726842     | 2.169E-24 | -1.469638 | down      | PREDICTED: uncharacterized protein LOC105160250 [Sesamum indicum]                                   |
| c48489.graph_c0 | 13.960049     | 13.6982247    | 12.451232     | 6.11316173     | 6.27447407     | 5.79706575     | 1.543E-38 | -2.15738  | down      | PREDICTED: BTB/POZ domain-containing protein At2g04740 isoform X1 [Sesamum indicum]                 |
| c48492.graph_c0 | 26.7311619    | 26.7579291    | 29.2324602    | 5.1510996      | 4.11141231     | 4.14391167     | 9.384E-62 | -3.639289 | down      | hypothetical protein MIMGU_mgv1a013606mg [Erythranthe guttata]                                      |
| c48492.graph_c2 | 10.8446446    | 11.3489358    | 10.4518482    | 0.72660319     | 0.57731098     | 0.76775099     | 4.947E-58 | -4.992804 | down      | hypothetical protein VITISV_043907 [Vitis vinifera]                                                 |
| c48492.graph_c3 | 1.03781954    | 1.45440226    | 1.1669343     | 0.56171289     | 0.45579577     | 0.53171144     | 4.539E-10 | -2.254378 | down      | OSJNBb0012A12.6 [Oryza sativa Japonica Group]                                                       |
| c48494.graph_c0 | 40.4070459    | 40.307389     | 39.7329529    | 26.5078412     | 27.7327179     | 27.6408489     | 1.166E-28 | -1.57488  | down      | PREDICTED: chromatin modification-related protein eaf-1 isoform X2 [Sesamum indicum]                |
| c48495.graph_c0 | 0.92749032    | 1.04744714    | 1.1001801     | 9.11428881     | 10.212531      | 9.7863927      | 3.275E-17 | 2.222304  | up        | PREDICTED: uncharacterized protein LOC105160781 [Sesamum indicum]                                   |
| c48498.graph_c0 | 3530.09566    | 3650.77638    | 3524.72972    | 321.74047      | 315.588884     | 298.972741     | 9.665E-98 | -4.531719 | down      | hypothetical protein MIMGU_mgv1a004937mg [Erythranthe guttata]                                      |
| c48500.graph_c0 | 1.97303984    | 1.71284533    | 2.10912234    | 1.12600451     | 1.2780699      | 1.14504233     | 1.154E-07 | -1.727679 | down      | PREDICTED: phosphatidylinositol/phosphatidylcholine transfer protein SFH11 [Sesamum indicum]        |
| c48503.graph_c0 | 31.6259776    | 30.0653977    | 29.979481     | 145.248562     | 146.750324     | 169.892863     | 3.716E-21 | 1.31464   | up        | PREDICTED: potassium transporter 4-like [Sesamum indicum]                                           |
| c48504.graph_c0 | 42.1068286    | 41.3585222    | 41.1343932    | 38.6876278     | 38.7828438     | 37.1982847     | 7.556E-16 | -1.136783 | down      | PREDICTED: uncharacterized protein C594.04c [Sesamum indicum]                                       |

| #ID             | 0 h-1<br>FPKM | 0 h-2<br>FPKM | 0 h-3<br>FPKM | 48 h-1<br>FPKM | 48 h-2<br>FPKM | 48 h-3<br>FPKM | FDR       | log2FC    | regulated | nr_annotation                                                                                |
|-----------------|---------------|---------------|---------------|----------------|----------------|----------------|-----------|-----------|-----------|----------------------------------------------------------------------------------------------|
| c48506.graph_c0 | 41.3151423    | 40.6495642    | 35.4952345    | 29.7485221     | 25.4264011     | 25.2800293     | 7.28E-27  | -1.558603 | down      | hypothetical protein MIMGU_mgv1a010122mg<br>[Erythranthe guttata]                            |
| c48506.graph_c1 | 0.88428517    | 0.66387798    | 0.67470273    | 4.7097599      | 4.98941953     | 5.54986718     | 1.4E-06   | 1.760827  | up        | PREDICTED: uncharacterized protein LOC105174972<br>isoform X1 [Sesamum indicum]              |
| c48506.graph_c2 | 0.55393766    | 0.63370553    | 0.33049335    | 5.30371924     | 6.98952017     | 6.38959344     | 1.854E-16 | 2.604864  | up        | PREDICTED: probable L-type lectin-domain containing<br>receptor kinase S.7 [Sesamum indicum] |
| c48506.graph_c5 | 2.19585028    | 2.97277131    | 2.24352616    | 20.5280746     | 20.0430805     | 20.818242      | 2.138E-32 | 2.033788  | up        | PREDICTED: CO(2)-response secreted protease-like<br>[Sesamum indicum]                        |
| c48508.graph_c0 | 387.044072    | 387.885637    | 411.473351    | 360.905286     | 373.703793     | 376.527673     | 4.536E-13 | -1.113368 | down      | PREDICTED: F-box protein CPK50-like [Solanum<br>tuberosum]                                   |
| c48512.graph_c2 | 29.3807632    | 28.4393368    | 29.8454125    | 11.5441829     | 14.1732822     | 15.6676306     | 1.41E-48  | -2.105157 | down      | hypothetical protein MIMGU_mgv1a005052mg<br>[Erythranthe guttata]                            |
| c48519.graph_c2 | 33.0446698    | 32.2610242    | 34.3379375    | 15.127493      | 14.0349688     | 13.9898485     | 2.384E-48 | -2.223773 | down      | hypothetical protein MIMGU_mgv1a005028mg<br>[Erythranthe guttata]                            |
| c48526.graph_c0 | 3.15509773    | 3.20152088    | 3.6101049     | 0.15927024     | 0.1687275      | 0.10628827     | 7.243E-27 | -5.53718  | down      | hypothetical protein MIMGU_mgv1a026399mg<br>[Erythranthe guttata]                            |
| c48527.graph_c0 | 0             | 0             | 0             | 4.52490288     | 7.3832243      | 4.81296624     | 2.983E-17 | Inf       | up        | conserved unknown protein [Ectocarpus siliculosus]                                           |
| c48529.graph_c0 | 8.18357843    | 6.66427142    | 7.02015265    | 3.52259933     | 3.32752757     | 3.2559033      | 1.965E-41 | -2.128795 | down      | PREDICTED: LOW QUALITY PROTEIN: uncharacterized<br>protein LOC105155975 [Sesamum indicum]    |
| c48530.graph_c1 | 0             | 0             | 0             | 1.76431574     | 10.3578105     | 12.0357278     | 4.581E-05 | Inf       | up        | PREDICTED: non-specific lipid-transfer protein-like protein<br>At2g13820 [Sesamum indicum]   |
| c48533.graph_c0 | 0             | 0             | 0             | 2.19900306     | 1.80012776     | 1.24514708     | 1.619E-09 | Inf       | up        | predicted protein [Hordeum vulgare subsp. vulgare]                                           |
| c48536.graph_c0 | 0             | 0             | 0.29304319    | 3.06727462     | 5.29697614     | 5.83235386     | 1.457E-11 | 4.538389  | up        | PREDICTED: glycerophosphodiester phosphodiesterase<br>GDPD6 [Solanum lycopersicum]           |
| c48537.graph_c0 | 0.87745541    | 0.61483384    | 1.80410391    | 809.177529     | 1101.29067     | 1026.70315     | 7.69E-163 | 8.76659   | up        | hypothetical protein CAKUB_v10002750mg [Capsella<br>embellata]                               |
| c48542.graph_c0 | 0             | 0             | 0             | 2.94636059     | 3.48852493     | 4.16380331     | 5.354E-12 | Inf       | up        | PREDICTED: probable protein phosphatase 2C 60 isoform<br>X3 [Nicotiana glauca]               |
| c48543.graph_c0 | 0             | 0             | 0             | 1.32677319     | 3.44361053     | 2.1840264      | 3.445E-06 | Inf       | up        | -                                                                                            |
| c48546.graph_c0 | 11.0039397    | 9.90831546    | 8.45786808    | 2.60544432     | 3.3121828      | 3.3299343      | 1.445E-42 | -2.686708 | down      | PREDICTED: cytosolic Fe-S cluster assembly factor narfl<br>[Sesamum indicum]                 |
| c48549.graph_c0 | 1.36240801    | 1.55859686    | 1.50064134    | 13.0175857     | 12.1189714     | 9.57270207     | 4.716E-11 | 1.957954  | up        | dimethylamine monooxygenase, putative [Klebsiella<br>communis]                               |
| c48550.graph_c1 | 44.8074016    | 47.9415839    | 39.0716577    | 16.4275565     | 20.5266203     | 16.9596315     | 4.036E-34 | -2.308447 | down      | PREDICTED: putative E3 ubiquitin-protein ligase RF4<br>[Sesamum indicum]                     |
| c48553.graph_c0 | 2.35059646    | 2.43903377    | 2.24703878    | 1.18839664     | 0.95121584     | 0.98693298     | 7.704E-09 | -2.182964 | down      | PREDICTED: uncharacterized protein LOC103423938<br>[Malus domestica]                         |
| c48554.graph_c1 | 57.8001558    | 60.7583452    | 54.0284198    | 11.9825478     | 10.733186      | 12.204955      | 6.46E-112 | -3.320565 | down      | unnamed protein product [Coffea canephora]                                                   |
| c48555.graph_c0 | 42.8824173    | 43.8463307    | 41.8432478    | 36.7052756     | 36.2885654     | 33.758642      | 5.01E-20  | -1.284589 | down      | PREDICTED: cytokinesis protein seph-like [Sesamum<br>indicum]                                |

| #ID             | 0 h-1<br>FPKM | 0 h-2<br>FPKM | 0 h-3<br>FPKM | 48 h-1<br>FPKM | 48 h-2<br>FPKM | 48 h-3<br>FPKM | FDR       | log2FC    | regulated | nr_annotation                                                                                                                   |
|-----------------|---------------|---------------|---------------|----------------|----------------|----------------|-----------|-----------|-----------|---------------------------------------------------------------------------------------------------------------------------------|
| c48556.graph_c0 | 0             | 0             | 0             | 5.24409842     | 6.82406203     | 5.40099672     | 1.229E-22 | Inf       | up        | glyceraldehyde 3-phosphate dehydrogenase [Daucus carota]                                                                        |
| c48557.graph_c0 | 16.8826467    | 17.7657426    | 15.874018     | 16.1960304     | 16.3390541     | 15.4678984     | 4.546E-15 | -1.090105 | down      | PREDICTED: uncharacterized protein LOC105167386 [Sesamum indicum]                                                               |
| c48559.graph_c0 | 0             | 0             | 0             | 0.97478482     | 0.95890444     | 0.92931179     | 1.664E-11 | Inf       | up        | --                                                                                                                              |
| c48560.graph_c0 | 12.1310594    | 12.5340227    | 11.4318539    | 12.4348203     | 9.74380162     | 9.92140888     | 2.362E-12 | -1.181207 | down      | PREDICTED: putative methyltransferase At1g22800 [Sesamum indicum]                                                               |
| c48560.graph_c1 | 20.9709972    | 19.6728273    | 20.2482362    | 15.3608647     | 18.677571      | 18.0361304     | 7.823E-12 | -1.246373 | down      | PREDICTED: glucose-induced degradation protein 8 homolog isoform X1 [Sesamum indicum]                                           |
| c48562.graph_c0 | 18.0271954    | 13.9705138    | 12.8105031    | 9.33712003     | 9.16184224     | 9.12530472     | 1.415E-11 | -1.712074 | down      | TBC1 domain family member 15 [Morus notabilis]                                                                                  |
| c48565.graph_c0 | 0.05165816    | 0             | 0.06638278    | 11.8977168     | 15.2258594     | 22.3163775     | 1.051E-18 | 7.676397  | up        | PREDICTED: shikimate O-hydroxycinnamoyltransferase-like [Sesamum indicum]                                                       |
| c48566.graph_c0 | 0             | 0             | 0.09451842    | 22.3613779     | 41.9226495     | 20.0176076     | 2.506E-13 | 8.743428  | up        | predicted protein [Hordeum vulgare subsp. vulgare]                                                                              |
| c48568.graph_c1 | 31.3670313    | 29.8177411    | 28.0172029    | 22.6318531     | 23.205119      | 24.3446834     | 2.805E-22 | -1.363219 | down      | PREDICTED: DEAD-box ATP-dependent RNA helicase ISE2, chloroplastic [Sesamum indicum]<br>PREDICTED: LOW QUALITY PROTEIN: US SHAN |
| c48569.graph_c0 | 44.540369     | 47.4072044    | 39.8739664    | 31.5703991     | 36.0498094     | 32.5122453     | 6.74E-22  | -1.414458 | down      | nuclear ribonucleoprotein 200 kDa helicase-like [Sesamum indicum]                                                               |
| c48571.graph_c0 | 4.71332335    | 3.59082585    | 4.60973743    | 1.52940293     | 2.24337732     | 2.06507144     | 7.659E-19 | -2.169999 | down      | hypothetical protein VITISV_032357 [Vitis vinifera]                                                                             |
| c48572.graph_c0 | 44.3257829    | 42.8917044    | 43.4242122    | 32.402484      | 33.2018227     | 35.1247132     | 1.135E-22 | -1.393358 | down      | hypothetical protein MIMGU_mgv1a000350mg [Erythranthe guttata]                                                                  |
| c48573.graph_c0 | 31.5285691    | 32.7981346    | 29.2785752    | 11.7949934     | 11.764344      | 11.3518583     | 2.023E-64 | -2.439041 | down      | PREDICTED: transcription initiation factor TFIID subunit 1 isoform X2 [Sesamum indicum]                                         |
| c48574.graph_c0 | 1.14820929    | 0.53876205    | 0.6455288     | 6.90879079     | 7.87933432     | 11.0888516     | 5.214E-09 | 2.453257  | up        | PREDICTED: glucan endo-1,3-beta-glucosidase 4-like isoform X1 [Sesamum indicum]                                                 |
| c48574.graph_c1 | 57.9622402    | 58.3229425    | 55.3674373    | 36.4625783     | 38.2440594     | 38.7892637     | 2.645E-30 | -1.614771 | down      | PREDICTED: thylakoid lumenal 19 kDa protein, chloroplastic [Sesamum indicum]                                                    |
| c48575.graph_c1 | 34.2174392    | 37.123103     | 37.5857879    | 8.58869357     | 10.0985343     | 8.6499263      | 1.358E-71 | -3.014518 | down      | hypothetical protein MIMGU_mgv1a015601mg [Erythranthe guttata]                                                                  |
| c48578.graph_c0 | 0             | 0             | 0             | 0.86191011     | 0.94569958     | 0.87648278     | 2.033E-11 | Inf       | up        | putative Trypsin [Glarea lozoyensis 74030]                                                                                      |
| c48579.graph_c0 | 0             | 0             | 0             | 1.56743825     | 2.03327849     | 1.22391789     | 9.415E-13 | Inf       | up        | PREDICTED: unol protease aeurain-like [Eucalyptus grandis]                                                                      |
| c48580.graph_c1 | 13.6976803    | 14.0131142    | 11.9642374    | 10.4902856     | 11.0478139     | 10.8990431     | 5.925E-14 | -1.307366 | down      | PREDICTED: uncharacterized protein LOC105168601 [Sesamum indicum]                                                               |
| c48580.graph_c2 | 0.69241881    | 1.07320593    | 0.6601635     | 14.9803935     | 13.9297703     | 15.8928226     | 1.179E-42 | 3.192267  | up        | PREDICTED: cinnamoyl-CoA reductase 2 [Sesamum indicum]                                                                          |
| c48580.graph_c3 | 2.58146671    | 2.13614937    | 2.56536855    | 1.2683816      | 1.10854962     | 1.07216841     | 1.509E-07 | -2.093423 | down      | -                                                                                                                               |
| c48580.graph_c4 | 40.6532393    | 39.579848     | 41.740125     | 9.95673011     | 9.17585741     | 8.69137335     | 1.262E-95 | -3.147935 | down      | PREDICTED: uncharacterized protein LOC105176765 [Sesamum indicum]                                                               |

| #ID             | 0 h-1<br>FPKM | 0 h-2<br>FPKM | 0 h-3<br>FPKM | 48 h-1<br>FPKM | 48 h-2<br>FPKM | 48 h-3<br>FPKM | FDR       | log2FC    | regulated | nr_annotation                                                                                   |
|-----------------|---------------|---------------|---------------|----------------|----------------|----------------|-----------|-----------|-----------|-------------------------------------------------------------------------------------------------|
| c48582.graph_c0 | 55.5944087    | 53.9995446    | 52.3078534    | 25.0077763     | 24.4030734     | 25.4190651     | 1.634E-50 | -2.13014  | down      | PREDICTED: uncharacterized protein LOC105174456 [Sesamum indicum]                               |
| c48587.graph_c1 | 3.66530488    | 3.17457423    | 3.03982718    | 14.2253223     | 14.055189      | 14.7885164     | 4.419E-08 | 1.108029  | up        | PREDICTED: rab3 GTPase-activating protein catalytic subunit isoform X4 [Sesamum indicum]        |
| c48588.graph_c0 | 446.523713    | 412.155812    | 456.124903    | 202.145027     | 242.053349     | 222.808228     | 4.251E-35 | -1.999847 | down      | vacuolar-processing enzyme precursor [Sesamum indicum]                                          |
| c48589.graph_c2 | 1.13414962    | 1.07336065    | 1.24543776    | 5.96515852     | 5.75585214     | 5.86558432     | 1.947E-06 | 1.330448  | up        | PREDICTED: GPI ethanolamine phosphate transferase 2 isoform X1 [Sesamum indicum]                |
| c48591.graph_c0 | 0             | 0             | 0             | 1.43342844     | 2.35529215     | 0.59868343     | 6.933E-05 | Inf       | up        | -                                                                                               |
| c48596.graph_c1 | 18.9954413    | 19.1119724    | 17.7754101    | 11.644124      | 12.4781448     | 12.2972964     | 1.202E-26 | -1.635582 | down      | hypothetical protein MIMGU_mgv1a011046mg [Erythranthe guttata]                                  |
| c48601.graph_c0 | 0.40448621    | 0.17352482    | 0.185636      | 1.70349295     | 4.03225192     | 5.75514282     | 0.0023633 | 2.884546  | up        | PREDICTED: lactosylceramide alpha-2,3-sialyltransferase [Sesamum indicum]                       |
| c48601.graph_c2 | 289.713444    | 303.527481    | 314.682415    | 245.811628     | 174.127982     | 156.011039     | 7.716E-27 | -1.666808 | down      | PREDICTED: B2 protein [Sesamum indicum]                                                         |
| c48601.graph_c3 | 0.89603625    | 1.02981253    | 0.76762804    | 33.6309535     | 19.9192446     | 11.1537221     | 0.0008268 | 3.586449  | up        | PREDICTED: cytochrome P450 CYP736A12-like [Sesamum indicum]                                     |
| c48601.graph_c5 | 11.9823753    | 9.69818577    | 11.6078741    | 11.2489613     | 11.0825877     | 10.4413965     | 8.855E-12 | -1.039609 | down      | PREDICTED: SUN domain-containing protein 2 [Sesamum indicum]                                    |
| c48601.graph_c8 | 39.9759573    | 38.244221     | 29.4577054    | 28.198032      | 20.4345725     | 17.34036       | 2.473E-13 | -1.713249 | down      | PREDICTED: B2 protein [Sesamum indicum]                                                         |
| c48602.graph_c0 | 26.7012916    | 24.2013024    | 22.655186     | 21.0017806     | 21.5944623     | 19.657185      | 4.818E-16 | -1.256559 | down      | PREDICTED: mediator of RNA polymerase II transcription subunit 15a isoform X2 [Sesamum indicum] |
| c48604.graph_c0 | 0.71166757    | 0.61523745    | 0.58196791    | 6.40733802     | 5.17766894     | 4.37534785     | 1.928E-07 | 2.053571  | up        | PREDICTED: probable serine/threonine-protein kinase At5g41260 [Sesamum indicum]                 |
| c48605.graph_c0 | 1.54547315    | 1.6437095     | 1.365371      | 8.25353652     | 7.30599072     | 6.13645181     | 7.687E-06 | 1.239974  | up        | PREDICTED: abietadienol/abietadienal oxidase [Sesamum indicum]                                  |
| c48612.graph_c0 | 23.4005982    | 25.7291448    | 23.5430479    | 8.29879864     | 9.022928       | 8.96655422     | 8.557E-53 | -2.485655 | down      | PREDICTED: autopnogy-related protein 9 [Sesamum indicum]                                        |
| c48612.graph_c1 | 37.4865573    | 37.6019452    | 35.079399     | 0.42989703     | 1.13855945     | 0.51002639     | 1.32E-151 | -6.757578 | down      | hypothetical protein CICLE_V10018809mg [Citrus limoninal]                                       |
| c48616.graph_c0 | 10.0101968    | 9.12893406    | 8.8761612     | 6.23917413     | 7.82097845     | 7.25465385     | 1.844E-14 | -1.414517 | down      | PREDICTED: ues1-like protein At4g17480 [Sesamum indicum]                                        |
| c48617.graph_c0 | 0.6290517     | 0.53708137    | 0.66570522    | 0.39203057     | 0.28891051     | 0.21232914     | 2.291E-05 | -2.046088 | down      | hypothetical protein VITISV_012155 [Vitis vinifera]                                             |
| c48618.graph_c3 | 2.68109055    | 3.70992462    | 3.95197037    | 1.88882008     | 2.53970011     | 3.2966807      | 0.0014889 | -1.448495 | down      | PREDICTED: dnaJ homolog subfamily C member 21 [Sesamum indicum]                                 |
| c48620.graph_c1 | 236.748792    | 237.107703    | 249.172695    | 117.034703     | 124.459263     | 110.955056     | 1.951E-42 | -2.054945 | down      | hypothetical protein VITISV_027576 [Vitis vinifera]                                             |
| c48620.graph_c2 | 7.48928205    | 7.03237904    | 8.00582523    | 1.89281477     | 2.06989185     | 2.77080564     | 4.988E-15 | -2.764617 | down      | -                                                                                               |
| c48620.graph_c4 | 0.60275155    | 0.42234858    | 0.54219172    | 6.8856461      | 6.76506708     | 6.57149406     | 1.978E-08 | 2.672677  | up        | -                                                                                               |
| c48622.graph_c1 | 56.6734261    | 62.1634886    | 53.7146262    | 25.3457462     | 32.2780229     | 33.4143313     | 9.638E-43 | -1.943696 | down      | PREDICTED: uncharacterized protein LOC105161451 [Sesamum indicum]                               |
| c48623.graph_c1 | 2.70995311    | 1.87800004    | 2.74573613    | 1.44033782     | 1.1189664      | 0.81168249     | 2.326E-06 | -2.132611 | down      | -                                                                                               |

| #ID             | 0 h-1<br>FPKM | 0 h-2<br>FPKM | 0 h-3<br>FPKM | 48 h-1<br>FPKM | 48 h-2<br>FPKM | 48 h-3<br>FPKM | FDR       | log2FC    | regulated | nr_annotation                                                                                                |
|-----------------|---------------|---------------|---------------|----------------|----------------|----------------|-----------|-----------|-----------|--------------------------------------------------------------------------------------------------------------|
| c48623.graph_c2 | 11.4937931    | 12.2537886    | 10.7617692    | 45.2682404     | 50.6876306     | 46.0060891     | 1.312E-12 | 1.022529  | up        | unnamed protein product [Coffea canephora]                                                                   |
| c48623.graph_c3 | 584.225012    | 601.156751    | 572.264226    | 3016.77032     | 3248.48021     | 3754.0922      | 9.544E-14 | 1.49147   | up        | PREDICTED: CBL-interacting serine/threonine-protein kinase 3-like [Sesamum indicum]                          |
| c48623.graph_c4 | 3.074017      | 1.53854758    | 0.65837226    | 11.3279399     | 15.5007475     | 11.3394744     | 0.0010015 | 1.846679  | up        | -                                                                                                            |
| c48624.graph_c0 | 1.86339681    | 2.08048534    | 1.93405047    | 15.6482229     | 16.3675543     | 17.9186788     | 9.601E-10 | 2.067714  | up        | PREDICTED: pyridoxal biosynthesis protein PDX2 [Sesamum indicum]                                             |
| c48625.graph_c0 | 222.081868    | 232.184438    | 219.954492    | 36.1065343     | 35.3840574     | 39.369851      | 3.43E-112 | -3.62207  | down      | hypothetical protein MIMGU_mgv1a004857mg [Erythranthe guttata]                                               |
| c48627.graph_c1 | 6.95907194    | 9.27134874    | 7.5272943     | 2.16779925     | 3.61579815     | 3.77570885     | 6.191E-16 | -2.339719 | down      | hypothetical protein MIMGU_mgv1a018596mg [Erythranthe guttata]                                               |
| c48632.graph_c0 | 0             | 0             | 0             | 1.09637547     | 1.48669039     | 1.05359216     | 1.931E-11 | Inf       | up        | 26S proteasome complex ubiquitin receptor, subunit Rpn13 domain-containing protein [Rozella allomyces CSF55] |
| c48637.graph_c0 | 14.8027536    | 14.0899275    | 13.5023116    | 2.67874792     | 3.22478251     | 3.08775968     | 3.55E-33  | -3.257081 | down      | PREDICTED: kinesin-1-like protein PSS1 isoform X2 [Sesamum indicum]                                          |
| c48639.graph_c1 | 4.74010102    | 7.5648984     | 5.11432411    | 0.61795617     | 0.78557955     | 1.35630574     | 1.639E-13 | -3.682635 | down      | PREDICTED: multiple C2 and transmembrane domain-containing protein 1 [Sesamum indicum]                       |
| c48639.graph_c2 | 216.740662    | 209.092159    | 224.914944    | 145.525107     | 166.91001      | 160.398882     | 6.446E-23 | -1.481041 | down      | PREDICTED: uncharacterized protein LOC105176680 [Sesamum indicum]                                            |
| c48642.graph_c0 | 0.06520378    | 0.17405086    | 0.22343851    | 0.9410963      | 1.37879855     | 1.47878067     | 8.822E-05 | 2.004165  | up        | PREDICTED: protein BREAST CANCER SUSCEPTIBILITY 2 homolog B [Sesamum indicum]                                |
| c48643.graph_c1 | 1.68641498    | 1.74255862    | 1.81757614    | 14.6843611     | 22.9893444     | 33.8022887     | 2.88E-05  | 2.739586  | up        | PREDICTED: fatty acid desaturase 4, chloroplastic-like [Sesamum indicum]                                     |
| c48646.graph_c1 | 3.09969039    | 2.3270957     | 3.37042105    | 0.38441267     | 0.63994639     | 0.39091209     | 2.583E-13 | -3.661839 | down      | BnaC03g12490D [Brassica napus]                                                                               |
| c48646.graph_c2 | 152.514859    | 159.352951    | 149.523227    | 142.196145     | 149.17031      | 155.559448     | 1.056E-12 | -1.064225 | down      | PREDICTED: WD-40 repeat-containing protein MSI1 [Sesamum indicum]                                            |
| c48649.graph_c1 | 20.6978063    | 20.4363731    | 20.5173327    | 22.3142097     | 20.0039111     | 18.7987544     | 9.465E-13 | -1.027276 | down      | PREDICTED: uncharacterized protein LOC105175481 [Sesamum indicum]                                            |
| c48652.graph_c0 | 8.5244646     | 7.71251974    | 8.84768326    | 43.2686228     | 58.3172765     | 69.7437461     | 9.299E-09 | 1.747003  | up        | PREDICTED: uncharacterized protein LOC105158144 [Sesamum indicum]                                            |
| c48653.graph_c0 | 1.69299816    | 2.95669919    | 3.19392142    | 39.7557658     | 42.3976581     | 46.9198558     | 5.756E-62 | 3.016712  | up        | PREDICTED: serine carboxypeptidase-like 1 [Sesamum indicum]                                                  |
| c48657.graph_c0 | 0             | 0             | 0             | 5.3147747      | 5.47396048     | 6.63381266     | 8.433E-16 | Inf       | up        | predicted protein [Physcomitrella patens]                                                                    |
| c48658.graph_c0 | 53.7132597    | 51.0684712    | 50.0749632    | 40.8667649     | 39.1474228     | 41.9882174     | 1.594E-21 | -1.360588 | down      | PREDICTED: calmodulin-binding receptor-like cytoplasmic kinase 2 [Sesamum indicum]                           |
| c48659.graph_c1 | 0             | 0             | 0             | 5.4841141      | 7.24510487     | 4.93714036     | 4.414E-17 | Inf       | up        | -                                                                                                            |
| c48666.graph_c0 | 131.80232     | 133.054318    | 126.212006    | 117.860768     | 114.679448     | 102.555482     | 2.052E-16 | -1.238362 | down      | PREDICTED: sister chromatid cohesion protein PDS5 homolog A [Sesamum indicum]                                |

| #ID             | 0 h-1<br>FPKM | 0 h-2<br>FPKM | 0 h-3<br>FPKM | 48 h-1<br>FPKM | 48 h-2<br>FPKM | 48 h-3<br>FPKM | FDR       | log2FC    | regulated | nr_annotation                                                                                      |
|-----------------|---------------|---------------|---------------|----------------|----------------|----------------|-----------|-----------|-----------|----------------------------------------------------------------------------------------------------|
| c48669.graph_c0 | 2.2211366     | 2.56304084    | 2.21997103    | 1.10838862     | 1.53549668     | 1.87132249     | 1.118E-05 | -1.657513 | down      | PREDICTED: pentatricopeptide repeat-containing protein At4g25270, chloroplastic [Sesamum indicum]  |
| c48669.graph_c1 | 3.17070809    | 2.67513002    | 2.91034673    | 0.62594209     | 1.67987803     | 1.44809473     | 6.07E-08  | -2.253987 | down      | PREDICTED: probable serine/threonine protein kinase IRE [Sesamum indicum]                          |
| c48670.graph_c0 | 0             | 0             | 0             | 0.83580484     | 1.5771791      | 0.55777059     | 3.019E-05 | Inf       | up        | hypothetical protein AMTR_s00036p00173790 [Amborella trichopoda]                                   |
| c48671.graph_c0 | 59.0592952    | 57.1006374    | 57.103794     | 13.5538133     | 14.4760746     | 15.4882286     | 9.023E-93 | -3.012233 | down      | PREDICTED: protein DAMAGED DNA-BINDING 2 [Sesamum indicum]                                         |
| c48676.graph_c0 | 2.27398857    | 2.32368782    | 2.37425934    | 14.533692      | 15.3966843     | 15.8057676     | 9.714E-10 | 1.694594  | up        | PREDICTED: probable receptor-like protein kinase At1g80640 isoform X2 [Sesamum indicum]            |
| c48680.graph_c0 | 29.2128647    | 26.8476754    | 34.0815793    | 12.0102141     | 12.8692757     | 10.0738516     | 4.002E-24 | -2.385829 | down      | PREDICTED: zinc finger A20 and AN1 domain-containing stress-associated protein 5 [Sesamum indicum] |
| c48681.graph_c1 | 12.0052704    | 12.2244866    | 9.73512533    | 10.1447246     | 11.7167693     | 9.73935038     | 6.925E-09 | -1.120665 | down      | PREDICTED: uncharacterized protein LOC105173885 isoform X2 [Sesamum indicum]                       |
| c48681.graph_c2 | 1.96716664    | 1.8351816     | 2.13236728    | 13.6599231     | 15.594235      | 19.0545097     | 1.402E-18 | 2.002442  | up        | PREDICTED: subtilisin-like protease [Sesamum indicum]                                              |
| c48683.graph_c0 | 0.51029758    | 0.178783      | 0.3278763     | 9.87250767     | 11.3302852     | 11.7754104     | 4.007E-37 | 4.000966  | up        | PREDICTED: probable ATP-dependent RNA helicase DHX35 isoform X3 [Sesamum indicum]                  |
| c48684.graph_c0 | 7.35794011    | 7.43512132    | 7.21466513    | 6.52160528     | 7.72565986     | 6.94631081     | 1.359E-06 | -1.073996 | down      | PREDICTED: ATPase ASNA1 homolog 2-like [Sesamum indicum]                                           |
| c48684.graph_c1 | 15.2928437    | 18.0014422    | 15.558821     | 481.350951     | 509.295791     | 549.642236     | 3.65E-127 | 3.959993  | up        | Beta-galactosidase 8 [Morus notabilis]                                                             |
| c48685.graph_c0 | 15.6322026    | 14.1381853    | 14.1200485    | 55.73101       | 69.3787157     | 76.9347588     | 7.424E-12 | 1.181204  | up        | PREDICTED: blue-light photoreceptor PHK2 [Sesamum indicum]                                         |
| c48690.graph_c1 | 0             | 0             | 0             | 3.04521029     | 7.73363609     | 2.74672775     | 6.512E-06 | Inf       | up        | PREDICTED: fruit bromelain-like [Setaria italica]                                                  |
| c48695.graph_c0 | 96.0625346    | 90.8982787    | 98.029186     | 428.283453     | 452.004754     | 455.661081     | 1.581E-17 | 1.209933  | up        | PREDICTED: pre-mRNA-splicing factor 18 [Sesamum indicum]                                           |
| c48696.graph_c1 | 17.9791517    | 16.820126     | 16.9136305    | 110.214116     | 128.56761      | 125.025636     | 1.391E-36 | 1.794867  | up        | hypothetical protein MIMGU_mgv1a0087951mg, partial [Erythranthe guttata]                           |
| c48697.graph_c0 | 1.85551436    | 1.92880977    | 1.696599      | 18.1790333     | 21.5917875     | 20.6509398     | 4.728E-26 | 2.443342  | up        | PREDICTED: pentatricopeptide repeat-containing protein At1g07740, mitochondrial [Sesamum indicum]  |
| c48700.graph_c0 | 0             | 0             | 0             | 2.22825467     | 6.98727427     | 2.93437765     | 0.0001646 | Inf       | up        | -                                                                                                  |
| c48702.graph_c0 | 8.30269898    | 9.40098178    | 8.81528793    | 9.3292573      | 8.44855637     | 8.07796874     | 1.04E-08  | -1.051788 | down      | PREDICTED: phosphonipase SGR2-like [Sesamum indicum]                                               |
| c48702.graph_c1 | 19.5881959    | 22.3311175    | 23.6857832    | 10.5894483     | 11.1518563     | 10.4817536     | 8.664E-24 | -2.045221 | down      | PREDICTED: phospholipase SGR2-like isoform X2 [Sesamum indicum]                                    |
| c48703.graph_c0 | 8.64905604    | 9.78068421    | 8.97521018    | 5.73434655     | 5.08591661     | 4.80573666     | 8.84E-17  | -1.824981 | down      | calcium-dependent protein kinase 34 [Brassica napus]                                               |
| c48704.graph_c0 | 1.82642369    | 2.25484485    | 1.2517476     | 0.56087354     | 0.29708876     | 0.34934333     | 1.165E-09 | -3.144434 | down      | PREDICTED: uncharacterized protein LOC104774238, partial [Camelina sativa]                         |
| c48706.graph_c0 | 1.07175988    | 1.32040996    | 0.79456955    | 24.7223537     | 22.6500141     | 18.8890494     | 8.306E-27 | 3.367508  | up        | PREDICTED: uncharacterized protein LOC105173691 [Sesamum indicum]                                  |

| #ID             | 0 h-1<br>FPKM | 0 h-2<br>FPKM | 0 h-3<br>FPKM | 48 h-1<br>FPKM | 48 h-2<br>FPKM | 48 h-3<br>FPKM | FDR       | log2FC    | regulated | nr_annotation                                                                                           |
|-----------------|---------------|---------------|---------------|----------------|----------------|----------------|-----------|-----------|-----------|---------------------------------------------------------------------------------------------------------|
| c48706.graph_c2 | 105.852654    | 113.658579    | 96.2411806    | 403.643112     | 485.318713     | 475.067877     | 4.815E-12 | 1.091568  | up        | PREDICTED: pyruvate kinase, cytosolic isozyme-like [Sesamum indicum]                                    |
| c48706.graph_c3 | 0.68505914    | 0.68574513    | 0.52819687    | 88.0624402     | 108.490901     | 132.679757     | 5.534E-53 | 6.417695  | up        | -                                                                                                       |
| c48708.graph_c1 | 660.78492     | 638.12528     | 697.367549    | 435.943154     | 437.662806     | 409.488871     | 4.203E-22 | -1.655398 | down      | PREDICTED: 2-alkenal reductase (NADP(+)-dependent)-like [Sesamum indicum]                               |
| c48712.graph_c0 | 3.09567612    | 2.74463015    | 3.06879406    | 23.1821879     | 27.5800004     | 32.7717816     | 3.691E-20 | 2.206719  | up        | PREDICTED: cystinosin homolog isoform X1 [Sesamum indicum]                                              |
| c48714.graph_c0 | 39.1761932    | 44.4406617    | 39.1071889    | 24.4298009     | 27.2049997     | 32.6490252     | 4.936E-28 | -1.56241  | down      | hypothetical protein MIMGU_mgv1a0225922mg, partial [Erythranthe guttata]                                |
| c48714.graph_c2 | 1.3731092     | 0.8246905     | 1.76449969    | 16.1919713     | 16.0813408     | 13.0568138     | 7.594E-08 | 2.495497  | up        | -                                                                                                       |
| c48716.graph_c0 | 0             | 0             | 0             | 19.024381      | 35.3447451     | 18.0647203     | 6.319E-15 | Inf       | up        | unknown [Lotus japonicus]                                                                               |
| c48717.graph_c0 | 48.3775243    | 48.5310695    | 47.8817715    | 10.9426263     | 13.872435      | 14.6749565     | 1.244E-85 | -2.896495 | down      | hypothetical protein MIMGU_mgv1a002354mg [Erythranthe guttata]                                          |
| c48720.graph_c1 | 37.7618974    | 35.6697266    | 35.9705143    | 34.0432503     | 34.0172272     | 32.5762382     | 1.349E-15 | -1.137235 | down      | PREDICTED: polycomb group protein FERTILIZATION-INDEPENDENT ENDOSPERM-like isoform X1 [Sesamum indicum] |
| c48722.graph_c0 | 194.910592    | 182.679612    | 183.06037     | 1342.09534     | 1496.10495     | 1516.40701     | 7.669E-37 | 1.938225  | up        | PREDICTED: 60S ribosomal protein L7-2-like [Sesamum indicum]                                            |
| c48723.graph_c0 | 19.8951487    | 18.6093997    | 17.829928     | 113.326353     | 129.778041     | 136.662363     | 2.172E-33 | 1.7336    | up        | PREDICTED: lysosomal beta glucosidase-like [Sesamum indicum]                                            |
| c48725.graph_c1 | 0.25179482    | 0.20163756    | 0.19413978    | 2.1805162      | 2.82605467     | 3.34376652     | 2.597E-08 | 2.667371  | up        | PREDICTED: DNA polymerase epsilon catalytic subunit A [Sesamum indicum]                                 |
| c48728.graph_c0 | 45.9005398    | 46.6562834    | 42.187843     | 28.7644493     | 33.3789777     | 31.3488222     | 3.182E-28 | -1.546123 | down      | PREDICTED: protein cfxQ homolog [Sesamum indicum]                                                       |
| c48729.graph_c0 | 0             | 0             | 0             | 1.13857113     | 1.75444081     | 1.38149147     | 1.642E-11 | Inf       | up        | AaceriAFL219Wp [Saccharomycetaceae sp. &apos;Ashbya aceri&apos;]                                        |
| c48730.graph_c1 | 1.41100183    | 2.82482947    | 2.53847051    | 16.6388086     | 15.4234501     | 14.1111222     | 0.00074   | 1.750671  | up        | PREDICTED: 3-oxoacyl-[acyl-carrier-protein] reductase 4 [Sesamum indicum]                               |
| c48730.graph_c2 | 67.0908578    | 73.4480572    | 68.4497681    | 476.061812     | 516.972603     | 540.432137     | 4.124E-35 | 1.856117  | up        | PREDICTED: LOW QUALITY PROTEIN: dedicator of cytokinesis protein 7 [Sesamum indicum]                    |
| c48734.graph_c1 | 3.90400008    | 2.49487998    | 2.72097338    | 35.7629963     | 27.058752      | 25.7285669     | 4.116E-10 | 2.270517  | up        | PREDICTED: CTP synthase isoform X2 [Elaeis guineensis]                                                  |
| c48735.graph_c0 | 0             | 0             | 0             | 1.5312819      | 1.07577971     | 1.04699322     | 4.998E-15 | Inf       | up        | predicted protein [Hordeum vulgare subsp. vulgare]                                                      |
| c48736.graph_c1 | 75.128419     | 79.189465     | 73.340915     | 48.0254856     | 45.4723159     | 44.777509      | 6.347E-34 | -1.735087 | down      | PREDICTED: crossover junction endonuclease MUS81 isoform X1 [Sesamum indicum]                           |
| c48736.graph_c4 | 84.7408446    | 88.8407055    | 87.1460658    | 63.6511639     | 75.9613511     | 73.9124324     | 1.93E-19  | -1.308808 | down      | PREDICTED: vacuolar-sorting receptor 1-like [Sesamum indicum]                                           |
| c48739.graph_c1 | 8.28706107    | 8.59810965    | 9.45732013    | 80.0237852     | 103.765366     | 113.319245     | 3.422E-26 | 2.471383  | up        | PREDICTED: pentatricopeptide repeat-containing protein At1g74850, chloroplastic [Sesamum indicum]       |
| c48739.graph_c2 | 162.101675    | 200.672228    | 137.504826    | 2796.28652     | 2121.3092      | 1830.71327     | 2.606E-10 | 2.74563   | up        | PREDICTED: calreticulin [Sesamum indicum]                                                               |



| #ID             | 0 h-1<br>FPKM | 0 h-2<br>FPKM | 0 h-3<br>FPKM | 48 h-1<br>FPKM | 48 h-2<br>FPKM | 48 h-3<br>FPKM | FDR       | log2FC    | regulated | nr_annotation                                                                          |
|-----------------|---------------|---------------|---------------|----------------|----------------|----------------|-----------|-----------|-----------|----------------------------------------------------------------------------------------|
| c48739.graph_c3 | 11.343087     | 12.3185021    | 12.5136297    | 6.40801371     | 7.41514553     | 7.01761485     | 2.149E-08 | -1.816125 | down      | Os01g0916200 [Oryza sativa Japonica Group]                                             |
| c48743.graph_c0 | 85.088583     | 88.4511418    | 79.1937555    | 47.2437703     | 45.2833397     | 40.7182876     | 1.828E-40 | -1.938371 | down      | PREDICTED: non-lysosomal glucosylceramidase [Sesamum indicum]                          |
| c48744.graph_c0 | 0             | 0             | 0             | 1.96239415     | 0.77293129     | 0.85067702     | 9.424E-05 | Inf       | up        | -                                                                                      |
| c48745.graph_c1 | 21.221314     | 21.4460368    | 20.2437043    | 19.0073904     | 18.2910496     | 17.9790758     | 7.273E-17 | -1.202598 | down      | PREDICTED: phosphoinositide phosphatase SAC2 [Sesamum indicum]                         |
| c48750.graph_c0 | 61.3891537    | 64.918972     | 47.9578857    | 31.7257698     | 41.3021274     | 50.1060994     | 1.266E-12 | -1.521915 | down      | PREDICTED: ABC transporter C family member 3-like [Sesamum indicum]                    |
| c48751.graph_c0 | 680.067546    | 668.498249    | 714.345067    | 252.885961     | 267.74639      | 258.902845     | 2.838E-46 | -2.422865 | down      | PREDICTED: UBFP1-associated protein 2c [Sesamum indicum]                               |
| c48751.graph_c1 | 193.601193    | 208.676203    | 192.893131    | 52.5134926     | 59.4454739     | 60.3749727     | 5.036E-83 | -2.807645 | down      | PREDICTED: UBFP1-associated protein 2c [Sesamum indicum]                               |
| c48751.graph_c2 | 7.33233933    | 6.47193596    | 7.42647987    | 7.08778931     | 6.20433327     | 7.49102391     | 7.441E-06 | -1.04774  | down      | hypothetical protein MIMGU_mgv1a001442mg [Erythranthe guttata]                         |
| c48755.graph_c0 | 0             | 0             | 0             | 1.22448522     | 0.95582687     | 1.0035233      | 1.921E-11 | Inf       | up        | predicted protein [Physcomitrella patens]                                              |
| c48756.graph_c1 | 6.89438335    | 6.50916845    | 7.09771213    | 29.8811822     | 31.8848768     | 32.7534518     | 1.149E-11 | 1.185493  | up        | PREDICTED: probable beta-1,3-galactosyltransferase 9 isoform X1 [Sesamum indicum]      |
| c48756.graph_c3 | 45.550011     | 34.1967168    | 32.5925547    | 37.6719051     | 15.1552464     | 7.21321505     | 4.564E-06 | -1.893965 | down      | -                                                                                      |
| c48761.graph_c0 | 20.7644521    | 21.0356692    | 20.1195185    | 16.7287685     | 15.4025615     | 15.9618108     | 3.347E-21 | -1.380253 | down      | PREDICTED: metalloendopeptinase 1-like [Sesamum indicum]                               |
| c48762.graph_c1 | 2.27142245    | 2.16001209    | 2.06753134    | 1.18579676     | 1.86583817     | 2.26539359     | 1.926E-05 | -1.315398 | down      | PREDICTED: serine carboxypeptidase-like 40 [Sesamum indicum]                           |
| c48762.graph_c2 | 4.24403252    | 4.43709482    | 2.54508324    | 47.8743032     | 61.9465588     | 62.0032853     | 9.692E-35 | 2.918966  | up        | PREDICTED: uncharacterized GPI-anchored protein At3g06035-like [Sesamum indicum]       |
| c48762.graph_c3 | 0.10589435    | 0.31800116    | 0.13607843    | 2.82914667     | 3.82393449     | 3.81943926     | 6.993E-07 | 3.204808  | up        | -                                                                                      |
| c48764.graph_c0 | 12.7365586    | 11.0150309    | 12.726532     | 11.2376525     | 13.0474379     | 10.5557727     | 2.288E-11 | -1.085565 | down      | PREDICTED: elongator complex protein 1 [Sesamum indicum]                               |
| c48765.graph_c0 | 2.08574268    | 2.48933724    | 2.88643591    | 57.1652853     | 55.568505      | 58.2140024     | 1.22E-109 | 3.497826  | up        | PREDICTED: probable galacturonosyltransferase 4 [Sesamum indicum]                      |
| c48768.graph_c0 | 4.43713728    | 4.90911518    | 4.03770702    | 3.18807744     | 3.43954187     | 4.05496066     | 3.999E-09 | -1.343983 | down      | PREDICTED: serine/threonine-protein kinase ATR [Sesamum indicum]                       |
| c48769.graph_c0 | 0.06857308    | 0.16016406    | 0.08811912    | 4.10630934     | 3.12317516     | 3.07291372     | 1.1E-15   | 4.012596  | up        | PREDICTED: uncharacterized protein At5g41620-like [Sesamum indicum]                    |
| c48772.graph_c0 | 1.18838513    | 0.97876434    | 0.96653288    | 4.75344986     | 6.04871703     | 6.09159768     | 2.28E-08  | 1.410161  | up        | hypothetical protein MIMGU_mgv1a002385mg [Erythranthe guttata]                         |
| c48773.graph_c0 | 140.508411    | 130.60974     | 137.682426    | 109.11824      | 121.040799     | 110.567833     | 2.028E-19 | -1.281572 | down      | PREDICTED: uncharacterized protein LOC105180349 [Sesamum indicum]                      |
| c48774.graph_c0 | 996.611934    | 1006.31246    | 973.257363    | 597.412127     | 631.749332     | 705.159198     | 4.919E-24 | -1.640672 | down      | -                                                                                      |
| c48776.graph_c0 | 12.2160605    | 11.8554792    | 10.3377872    | 77.5444015     | 84.547929      | 78.5240046     | 1.554E-25 | 1.789007  | up        | PREDICTED: uncharacterized protein LOC104109628 isoform X2 [Nicotiana tomentosiformis] |

| #ID             | 0 h-1<br>FPKM | 0 h-2<br>FPKM | 0 h-3<br>FPKM | 48 h-1<br>FPKM | 48 h-2<br>FPKM | 48 h-3<br>FPKM | FDR       | log2FC    | regulated | nr_annotation                                                                                     |
|-----------------|---------------|---------------|---------------|----------------|----------------|----------------|-----------|-----------|-----------|---------------------------------------------------------------------------------------------------|
| c48777.graph_c0 | 11.3098722    | 13.1152669    | 11.9128144    | 4.27024261     | 6.75554768     | 7.09265423     | 2.306E-15 | -2.02984  | down      | PREDICTED: protein notum homolog isoform X2 [Sesamum indicum]                                     |
| c48781.graph_c0 | 0.46229822    | 0.42419771    | 0.29703576    | 5.46570733     | 5.11347121     | 4.10542829     | 1.23E-08  | 2.622923  | up        | PREDICTED: pullulanase 1, chloroplastic isoform X2 [Sesamum indicum]                              |
| c48782.graph_c0 | 0.53919581    | 0.28407144    | 0.36467787    | 2.09154672     | 2.09110476     | 2.25651791     | 0.0001976 | 1.422717  | up        | PREDICTED: uncharacterized protein LOC105163648 [Sesamum indicum]                                 |
| c48784.graph_c0 | 11.4591164    | 11.5804625    | 11.1992165    | 56.1213736     | 59.2823919     | 57.1704994     | 2.052E-20 | 1.315608  | up        | PREDICTED: acetyl-coenzyme A synthetase, chloroplastic/glyoxysomal isoform X1 [Sesamum indicum]   |
| c48784.graph_c1 | 11.2425973    | 11.7204328    | 10.3262616    | 43.4049504     | 45.1270514     | 47.0732523     | 1.565E-12 | 1.008866  | up        | PREDICTED: glutamine synthetase nodule isozyme-like [Sesamum indicum]                             |
| c48784.graph_c2 | 85.6961487    | 81.1126469    | 79.9804274    | 11.5210525     | 14.9800431     | 14.8398952     | 4.19E-126 | -3.599304 | down      | beta-D-glucosidase [Tropaeolum majus]                                                             |
| c48784.graph_c3 | 77.8386146    | 76.3447544    | 78.6625433    | 61.2853069     | 70.2759278     | 67.300897      | 3.446E-18 | -1.247497 | down      | PREDICTED: ubiquitin domain-containing protein DSK2a-like isoform X2 [Sesamum indicum]            |
| c48784.graph_c4 | 64.5642357    | 62.0357526    | 59.6649709    | 38.7359434     | 50.6953861     | 50.9654358     | 3.775E-22 | -1.429568 | down      | PREDICTED: probable LRR receptor-like serine/threonine-protein kinase At3g47570 [Sesamum indicum] |
| c48784.graph_c5 | 2.73719116    | 2.83778676    | 2.00994229    | 0.81053969     | 0.95407613     | 1.20202223     | 2.376E-06 | -2.373186 | down      | -                                                                                                 |
| c48784.graph_c6 | 0.05383449    | 0.0538884     | 0             | 1.19030023     | 1.47114189     | 2.18443909     | 4.067E-09 | 4.483622  | up        | PREDICTED: auxin response factor 18-like [Sesamum indicum]                                        |
| c48786.graph_c0 | 7.04226388    | 7.17033394    | 5.55403893    | 5.68029929     | 5.01465694     | 5.52503942     | 3.391E-09 | -1.298505 | down      | --                                                                                                |
| c48787.graph_c0 | 0.04887022    | 0             | 0             | 1.26062809     | 1.62165745     | 2.24339859     | 2.562E-10 | 5.709598  | up        | PREDICTED: phosphate transporter PHO1 homolog 3-like isoform X3 [Sesamum indicum]                 |
| c48792.graph_c0 | 0             | 0             | 0             | 1.22996759     | 1.82420212     | 1.31330132     | 1.525E-11 | Inf       | up        | PREDICTED: LOW QUALITY PROTEIN: calreticulin-like [Phoenix dactylifera]                           |
| c48795.graph_c1 | 69.509698     | 65.2057454    | 64.9619738    | 17.9303229     | 13.708824      | 14.8887006     | 1.696E-98 | -3.113739 | down      | hypothetical protein MIMGU_mgv1a013489mg [Erythranthe guttata]                                    |
| c48796.graph_c1 | 124.216675    | 134.935878    | 129.675488    | 144.29477      | 106.089679     | 85.6848957     | 1.293E-11 | -1.219917 | down      | PREDICTED: probable methyltransferase PMT15 [Sesamum indicum]                                     |
| c48796.graph_c2 | 14.9474235    | 14.2009462    | 13.5873603    | 13.5252646     | 14.4026181     | 13.2194623     | 8.26E-10  | -1.071788 | down      | PREDICTED: Down syndrome critical region protein 3 homolog isoform X1 [Sesamum indicum]           |
| c48796.graph_c3 | 34.8816774    | 35.8196218    | 26.9847658    | 28.8109374     | 34.8749492     | 30.2370961     | 2.064E-10 | -1.073934 | down      | PREDICTED: UDP-glycosyltransferase 74E2-like [Sesamum indicum]                                    |
| c48796.graph_c6 | 4.67929302    | 4.18509333    | 3.87825663    | 27.0385925     | 32.373249      | 30.5501074     | 5.874E-26 | 1.800864  | up        | hypothetical protein MIMGU_mgv1a006632mg [Erythranthe guttata]                                    |
| c48796.graph_c7 | 2.24395288    | 3.025124      | 2.48824038    | 24.0737596     | 28.0111645     | 30.1877404     | 3.158E-48 | 2.386104  | up        | hypothetical protein MIMGU_mgv1a025096mg, partial [Erythranthe guttata]                           |
| c48798.graph_c0 | 3.66660695    | 1.92845142    | 2.71523717    | 1.43132096     | 1.69826833     | 1.52829694     | 6.581E-05 | -1.853808 | down      | PREDICTED: uncharacterized protein LOC105168156 [Sesamum indicum]                                 |
| c48800.graph_c1 | 165.431296    | 162.251253    | 166.810563    | 136.17793      | 147.878686     | 142.101739     | 1.614E-16 | -1.233424 | down      | photosystem II protein D1 [Phaseolus vulgaris]                                                    |

| #ID             | 0 h-1<br>FPKM | 0 h-2<br>FPKM | 0 h-3<br>FPKM | 48 h-1<br>FPKM | 48 h-2<br>FPKM | 48 h-3<br>FPKM | FDR       | log2FC    | regulated | nr_annotation                                                                                       |
|-----------------|---------------|---------------|---------------|----------------|----------------|----------------|-----------|-----------|-----------|-----------------------------------------------------------------------------------------------------|
| c48801.graph_c1 | 17.2652332    | 16.1643563    | 15.6136608    | 7.4564356      | 8.68337041     | 7.66282778     | 5.43E-41  | -2.061508 | down      | PREDICTED: molybdenum cofactor sulfurase isoform X3 [Sesamum indicum]                               |
| c48802.graph_c0 | 39.0645936    | 40.8979432    | 39.1570034    | 25.692446      | 25.1856829     | 23.4227851     | 8.913E-33 | -1.697269 | down      | PREDICTED: cyclin-T1-3-like [Sesamum indicum]                                                       |
| c48803.graph_c0 | 29.4923089    | 27.5320608    | 29.1408811    | 27.4692233     | 27.9521358     | 26.2709392     | 6.773E-13 | -1.094316 | down      | PREDICTED: WAT1-related protein At4g08300 [Tarenaya hassleriana]                                    |
| c48804.graph_c0 | 11.634823     | 14.1539296    | 14.1888237    | 11.4778767     | 11.805573      | 10.4831294     | 7.392E-13 | -1.262023 | down      | PREDICTED: uncharacterized protein LOC105155609 [Sesamum indicum]                                   |
| c48804.graph_c2 | 7.35712958    | 6.26232707    | 6.36711617    | 24.8060734     | 31.3589875     | 32.7392033     | 7.138E-09 | 1.132135  | up        | PREDICTED: putative serine/threonine-protein kinase [Sesamum indicum]                               |
| c48808.graph_c0 | 18.1327747    | 16.6296111    | 18.5871908    | 10.187211      | 11.2012945     | 11.9428261     | 1.402E-18 | -1.69891  | down      | hypothetical protein MIMGU_mgv1a005510mg [Erythranthe guttata]                                      |
| c48808.graph_c1 | 23.3944742    | 22.5298975    | 21.5618532    | 19.3809186     | 19.8143594     | 18.6786474     | 3.131E-17 | -1.238331 | down      | PREDICTED: ubiquitin domain-containing protein DSK2a-like [Sesamum indicum]                         |
| c48808.graph_c2 | 487.48894     | 468.605443    | 478.682683    | 113.112366     | 126.780378     | 133.806355     | 4.805E-67 | -2.960812 | down      | PREDICTED: 26S proteasome non-ATPase regulatory subunit 14-like [Cucumis sativus]                   |
| c48810.graph_c0 | 2.20864639    | 2.83781775    | 2.28750291    | 34.8033206     | 35.8403721     | 38.8583555     | 1.841E-54 | 2.88226   | up        | hypothetical protein MIMGU_mgv1a006553mg [Erythranthe guttata]                                      |
| c48810.graph_c2 | 54.8362296    | 54.7939873    | 53.5671838    | 44.7068243     | 48.7823031     | 45.3092644     | 5.537E-19 | -1.251916 | down      | PREDICTED: uncharacterized protein LOC105170911 [Sesamum indicum]                                   |
| c48810.graph_c3 | 0             | 0             | 0             | 16.4186858     | 12.0690333     | 10.882399      | 2.254E-15 | Inf       | up        | unnamed protein product [Coffea canephora]                                                          |
| c48814.graph_c0 | 2.37542317    | 2.48788521    | 2.26112061    | 1.23603778     | 1.28796605     | 1.31617682     | 7.715E-09 | -1.909262 | down      | PREDICTED: molybdopterin biosynthesis protein CNX1 [Sesamum indicum]                                |
| c48815.graph_c0 | 0             | 0             | 0             | 1.72072739     | 1.76004333     | 1.21431504     | 1.687E-11 | Inf       | up        | --                                                                                                  |
| c48816.graph_c1 | 20.7865124    | 20.5770937    | 21.3913603    | 18.8850239     | 15.5449392     | 13.8578163     | 9.653E-20 | -1.391008 | down      | PREDICTED: serrate RNA effector molecule-like [Sesamum indicum]                                     |
| c48816.graph_c4 | 6.16193879    | 6.88868253    | 8.02934001    | 60.8264317     | 73.4871209     | 78.6943127     | 5.952E-44 | 2.313012  | up        | PREDICTED: uncharacterized protein LOC105168334 [Sesamum indicum]                                   |
| c48822.graph_c0 | 0             | 0             | 0             | 1.46053439     | 3.59185145     | 1.20674795     | 0.0002159 | Inf       | up        | hypothetical protein PNEG_01290 [Pneumocystis murina B1221]                                         |
| c48827.graph_c0 | 11.0691104    | 12.5315046    | 11.1787519    | 10.4801393     | 12.6263007     | 10.9936381     | 6.267E-10 | -1.048035 | down      | PREDICTED: callose synthase 5 [Sesamum indicum]                                                     |
| c48828.graph_c1 | 78.5264157    | 82.2280246    | 74.9812531    | 29.2459708     | 27.7473005     | 26.2863066     | 3.282E-65 | -2.516418 | down      | PREDICTED: LOW QUALITY PROTEIN: D3 domain-containing transcription repressor VAL1 [Sesamum indicum] |
| c48830.graph_c0 | 0             | 0             | 0             | 0.94680641     | 2.4421517      | 0.84246265     | 0.0003889 | Inf       | up        | -                                                                                                   |
| c48831.graph_c0 | 2.91945223    | 2.14307545    | 2.25096702    | 23.1902411     | 30.265837      | 39.5140748     | 1.718E-10 | 2.645721  | up        | PREDICTED: non-specific lipid-transfer protein 1-like [Sesamum indicum]                             |
| c48831.graph_c1 | 4.62922438    | 4.28413457    | 4.32125206    | 2.89680686     | 3.62290732     | 3.7589436      | 2.207E-05 | -1.386045 | down      | hypothetical protein MIMGU_mgv1a001779mg [Erythranthe guttata]                                      |

| #ID             | 0 h-1<br>FPKM | 0 h-2<br>FPKM | 0 h-3<br>FPKM | 48 h-1<br>FPKM | 48 h-2<br>FPKM | 48 h-3<br>FPKM | FDR       | log2FC    | regulated | nr_annotation                                                                                             |
|-----------------|---------------|---------------|---------------|----------------|----------------|----------------|-----------|-----------|-----------|-----------------------------------------------------------------------------------------------------------|
| c48832.graph_c0 | 34.3337096    | 34.6522615    | 32.0600891    | 681.577794     | 709.907039     | 812.674938     | 4.017E-86 | 3.42867   | up        | PREDICTED: aconitate hydratase, cytoplasmic [Sesamum indicum]                                             |
| c48832.graph_c2 | 207.492414    | 196.034086    | 211.442555    | 23.5474198     | 20.3037634     | 21.3690186     | 1.13E-158 | -4.252452 | down      | PREDICTED: (+)-neomenthol dehydrogenase-like isoform X1 [Sesamum indicum]                                 |
| c48837.graph_c0 | 39.2241732    | 34.1421307    | 41.024974     | 13.008912      | 9.58703644     | 7.99642992     | 8.2E-50   | -2.913479 | down      | -                                                                                                         |
| c48837.graph_c5 | 4.68802065    | 4.3493456     | 4.16312871    | 39.6075685     | 62.6787379     | 88.1689276     | 5.235E-06 | 2.824176  | up        | PREDICTED: 5-ketoacyl-CoA synthase 1 [Sesamum indicum]                                                    |
| c48837.graph_c8 | 0.32542795    | 0.21716921    | 0.13939594    | 4.29721156     | 6.45801976     | 5.69098866     | 3.047E-08 | 3.574979  | up        | TPA: hypothetical protein ZEAMMB73_870894 [Zea mays]                                                      |
| c48837.graph_c9 | 32.7406247    | 31.6624465    | 28.1080912    | 23.6019642     | 18.0530102     | 12.0167524     | 6.627E-26 | -1.79276  | down      | PREDICTED: probable WRKY transcription factor 33-like [Cicer arietinum]                                   |
| c48839.graph_c1 | 1.27716826    | 1.30303267    | 1.19934707    | 5.20423965     | 6.42414744     | 6.66418295     | 2.793E-05 | 1.25412   | up        | hypothetical protein MIMGU_mgv1a005831mg [Erythranthe guttata]                                            |
| c48845.graph_c0 | 0             | 0             | 0             | 1.69128533     | 2.15005407     | 3.00979103     | 1.312E-10 | Inf       | up        | -                                                                                                         |
| c48847.graph_c0 | 15.1463903    | 15.3393309    | 14.8993569    | 4.48766801     | 5.17507958     | 3.63954428     | 5.251E-59 | -2.78805  | down      | PREDICTED: uncharacterized protein LOC105164002 isoform X1 [Sesamum indicum]                              |
| c48847.graph_c1 | 1.34141809    | 1.31693899    | 1.65747631    | 0.09506168     | 0.07552974     | 0.08458531     | 2.27E-20  | -5.096325 | down      | PREDICTED: ABC transporter B family member 19-like [Sesamum indicum]                                      |
| c48848.graph_c0 | 1.76375725    | 1.10858445    | 1.73940537    | 24.4866877     | 29.9438672     | 30.0595186     | 4.358E-44 | 3.172705  | up        | PREDICTED: uncharacterized protein LOC105173962 [Sesamum indicum]                                         |
| c48848.graph_c1 | 1.02487585    | 1.44386223    | 1.21945005    | 13.4283731     | 12.3363779     | 12.7574977     | 6.321E-16 | 2.368282  | up        | PREDICTED: O-acyltransferase WSD1-like [Nicotiana tomentosiformis]                                        |
| c48848.graph_c2 | 0.40972361    | 0.31363179    | 0.46456858    | 4.75160707     | 6.65678356     | 7.50757725     | 5.287E-16 | 2.966295  | up        | PREDICTED: probable inactive leucine-rich repeat receptor-like protein kinase At1g66830 [Sesamum indicum] |
| c48848.graph_c3 | 54.7236139    | 56.2630125    | 52.9959838    | 51.7036726     | 52.059756      | 52.1535147     | 2.262E-14 | -1.089871 | down      | PREDICTED: myb-related protein 3R-1-like isoform X1 [Sesamum indicum]                                     |
| c48848.graph_c4 | 34.794188     | 34.006121     | 33.6338626    | 38.0316647     | 29.2091202     | 26.955712      | 5.448E-16 | -1.132087 | down      | PREDICTED: protein STRUBBELIG-RECEPTOR FAMILY 3-like [Sesamum indicum]                                    |
| c48849.graph_c1 | 244.99828     | 253.804355    | 247.589247    | 91.7683172     | 99.4243189     | 102.472618     | 3.58E-52  | -2.364911 | down      | PREDICTED: probable inactive receptor kinase At5g10020 [Sesamum indicum]                                  |
| c48850.graph_c0 | 0.16351582    | 0             | 0             | 22.9728199     | 31.1991298     | 20.7091567     | 5.764E-32 | 7.839784  | up        | -                                                                                                         |
| c48853.graph_c0 | 0             | 0             | 0             | 1.24205845     | 2.78951787     | 1.28200432     | 1.269E-05 | Inf       | up        | -                                                                                                         |
| c48861.graph_c0 | 12.0432512    | 11.6298291    | 10.8514453    | 10.6642804     | 10.67525       | 9.80260291     | 2.861E-15 | -1.164543 | down      | PREDICTED: phospholipase A I [Sesamum indicum]                                                            |
| c48861.graph_c1 | 5.48297191    | 5.3085127     | 4.62022032    | 4.8856559      | 3.68443933     | 4.34722724     | 0.0013913 | -1.266216 | down      | PREDICTED: phospholipase A I [Sesamum indicum]                                                            |
| c48862.graph_c0 | 18.3840319    | 16.5086773    | 19.1847602    | 18.8310402     | 17.6612668     | 16.8906014     | 1.076E-09 | -1.035342 | down      | PREDICTED: uncharacterized protein LOC105177107 isoform X1 [Sesamum indicum]                              |
| c48863.graph_c0 | 60.8142887    | 33.5626899    | 40.4483079    | 0              | 0              | 0              | 1.083E-33 | -Inf      | down      | predicted protein [Hordeum vulgare subsp. vulgare]                                                        |

| #ID             | 0 h-1<br>FPKM | 0 h-2<br>FPKM | 0 h-3<br>FPKM | 48 h-1<br>FPKM | 48 h-2<br>FPKM | 48 h-3<br>FPKM | FDR       | log2FC    | regulated | nr_annotation                                                                                    |
|-----------------|---------------|---------------|---------------|----------------|----------------|----------------|-----------|-----------|-----------|--------------------------------------------------------------------------------------------------|
| c48865.graph_c3 | 73.1994211    | 78.8623462    | 71.667927     | 59.3840117     | 62.5885851     | 61.7811746     | 3.719E-19 | -1.30179  | down      | PREDICTED: enhancer of mRNA-decapping protein 4-like [Sesamum indicum]                           |
| c48866.graph_c0 | 14.3838429    | 14.1116041    | 12.6810808    | 112.545022     | 112.735414     | 117.765122     | 4.63E-47  | 2.041998  | up        | hypothetical protein MIMGU_mgv1a005571mg [Erythranthe guttata]                                   |
| c48869.graph_c0 | 101.644942    | 102.615364    | 98.1677696    | 37.2276051     | 34.5542416     | 32.2001525     | 2.408E-69 | -2.555235 | down      | PREDICTED: uncharacterized protein LOC105165944 [Sesamum indicum]                                |
| c48870.graph_c0 | 226.363051    | 235.333954    | 204.303126    | 177.772533     | 124.769755     | 107.059079     | 3.897E-28 | -1.708958 | down      | PREDICTED: DNA repair helicase XPB1-like [Sesamum indicum]                                       |
| c48871.graph_c0 | 6.586903      | 4.34890346    | 6.24326836    | 22.1212647     | 24.7569944     | 24.1255293     | 4.71E-07  | 1.027014  | up        | hypothetical protein MIMGU_mgv1a012747mg [Erythranthe guttata]                                   |
| c48872.graph_c0 | 5.22314178    | 4.48146169    | 4.83990518    | 0.09820202     | 0.10403313     | 0.02912652     | 8.451E-50 | -6.985266 | down      | -                                                                                                |
| c48872.graph_c1 | 119.354218    | 127.462319    | 112.999087    | 71.6435313     | 78.3496672     | 74.0455481     | 5.357E-32 | -1.701377 | down      | PREDICTED: FACT complex subunit SPT16-like [Sesamum indicum]                                     |
| c48872.graph_c2 | 0.47902338    | 0.2950788     | 0.37880862    | 1.52760316     | 2.48140915     | 2.32583138     | 0.0006306 | 1.433391  | up        | PREDICTED: putative late blight resistance protein homolog R1A-10 [Sesamum indicum]              |
| c48879.graph_c1 | 1.17368585    | 1.07487294    | 1.37987255    | 9.7544895      | 9.45630931     | 9.15030728     | 1.347E-13 | 1.947766  | up        | PREDICTED: multisubstrate pseudouridine synthase 7 isoform X2 [Sesamum indicum]                  |
| c48880.graph_c0 | 0             | 0             | 0             | 8.16174103     | 10.8079687     | 6.62681963     | 3.044E-16 | Inf       | up        | predicted protein [Thalassiosira pseudonana CCMP1335]                                            |
| c48887.graph_c1 | 0             | 0             | 0             | 13.1147701     | 7.87298826     | 7.39064761     | 3.264E-09 | Inf       | up        | PREDICTED: zinc-finger homeodomain protein 10-like [Sesamum indicum]                             |
| c48887.graph_c2 | 37.0780082    | 37.0570531    | 35.0453099    | 164.538992     | 169.948551     | 165.574597     | 6.851E-17 | 1.178162  | up        | hypothetical protein MIMGU_mgv1a000942mg [Erythranthe guttata]                                   |
| c48889.graph_c0 | 1.44584185    | 0.692182      | 0.76741992    | 0              | 0              | 0              | 3.492E-11 | -Inf      | down      | PREDICTED: granule-bound starch synthase 1b, chloroplastic/amyloplastic-like [Elaeis guineensis] |
| c48892.graph_c0 | 0             | 0             | 0             | 7.14335724     | 12.4457574     | 2.83661389     | 9.029E-06 | Inf       | up        | predicted protein [Micromonas sp. RCC299]                                                        |
| c48893.graph_c0 | 5.81286319    | 4.52564303    | 5.60231951    | 4.31390202     | 4.25487982     | 5.02973776     | 0.0084521 | -1.248272 | down      | PREDICTED: calcium-dependent protein kinase 20-like [Malus domestica]                            |
| c48893.graph_c3 | 0.50132008    | 0.50182208    | 0             | 17.088404      | 15.4120918     | 21.780363      | 6.644E-12 | 4.755988  | up        | PREDICTED: UDP-glucuronate 4-epimerase 6 [Sesamum indicum]                                       |
| c48895.graph_c0 | 61.2924419    | 60.7836143    | 62.2200115    | 46.8368367     | 49.2843832     | 47.6053791     | 2.063E-22 | -1.377029 | down      | neutral/alkaline invertase 1 [Orobanche ramosa]                                                  |
| c48896.graph_c0 | 1.52905525    | 1.1704484     | 1.04023934    | 9.52920733     | 10.8850863     | 11.2070676     | 3.695E-06 | 2.062913  | up        | PREDICTED: N-acetyl-D-glucosamine kinase-like isoform X1 [Sesamum indicum]                       |
| c48898.graph_c0 | 0             | 0             | 0             | 2.01837124     | 1.97374116     | 1.79593459     | 9.459E-13 | Inf       | up        | hypothetical protein EUGK50Z_K01805 [Eucalyptus grandis]                                         |
| c48899.graph_c0 | 1.95226345    | 1.60815884    | 2.14287851    | 0.31849366     | 0.4366423      | 0.61679814     | 5.254E-15 | -3.082891 | down      | PREDICTED: phosphate transporter PHO1 homolog 9-like [Sesamum indicum]                           |
| c48900.graph_c0 | 5.32465352    | 2.43914584    | 2.9573044     | 0              | 0              | 0              | 3.814E-16 | -Inf      | down      | --                                                                                               |

| #ID             | 0 h-1<br>FPKM | 0 h-2<br>FPKM | 0 h-3<br>FPKM | 48 h-1<br>FPKM | 48 h-2<br>FPKM | 48 h-3<br>FPKM | FDR       | log2FC    | regulated | nr_annotation                                                                           |
|-----------------|---------------|---------------|---------------|----------------|----------------|----------------|-----------|-----------|-----------|-----------------------------------------------------------------------------------------|
| c48903.graph_c0 | 54.4673358    | 53.2023733    | 52.5114514    | 2.9631274      | 3.08761395     | 3.02557551     | 4.11E-180 | -5.159198 | down      | PREDICTED: phosphoenolpyruvate carboxylase kinase 2 [Sesamum indicum]                   |
| c48903.graph_c1 | 50.9896189    | 55.0331229    | 45.2233981    | 23.6315764     | 23.8135804     | 23.7197463     | 8.133E-39 | -2.10363  | down      | hypothetical protein MIMGU_mgv1a0000982mg, partial [Erythranthe guttata]                |
| c48903.graph_c2 | 53.4103412    | 52.3878221    | 53.5693674    | 23.3337345     | 21.6375506     | 18.4767207     | 6.483E-59 | -2.343519 | down      | PREDICTED: suppressor of mec-8 and unc-52 protein homolog 2 [Sesamum indicum]           |
| c48904.graph_c0 | 0             | 0             | 0             | 2.68726759     | 2.49497825     | 2.41798099     | 2.449E-16 | Inf       | up        | PREDICTED: cytochrome P450 OKI-1-like [Fryxus x bruceoides]                             |
| c48905.graph_c0 | 1.29792537    | 1.72483325    | 1.61037219    | 0.90710818     | 1.70353972     | 1.39414988     | 0.0011404 | -1.238621 | down      | PREDICTED: putative serine/threonine-protein kinase [Sesamum indicum]                   |
| c48907.graph_c4 | 25.7544416    | 22.9393171    | 27.9787421    | 21.3266874     | 21.9522486     | 19.5666566     | 5.036E-16 | -1.305386 | down      | PREDICTED: flowering time control protein FCA [Sesamum indicum]                         |
| c48909.graph_c1 | 17.5864922    | 16.6317828    | 16.7524168    | 10.9739097     | 9.28046331     | 10.3931359     | 1.796E-19 | -1.748624 | down      | hypothetical protein MIMGU_mgv1a025365mg [Erythranthe guttata]                          |
| c48913.graph_c0 | 0             | 0             | 0             | 3.29452945     | 5.67889541     | 3.62705139     | 1.44E-13  | Inf       | up        | -                                                                                       |
| c48914.graph_c1 | 34.865895     | 34.5033867    | 34.6466143    | 5.88547659     | 4.33276103     | 3.88573164     | 2.37E-146 | -3.892887 | down      | hypothetical protein MIMGU_mgv1a000556mg [Erythranthe guttata]                          |
| c48916.graph_c0 | 54.68476      | 52.3309797    | 53.1256937    | 245.951097     | 235.150949     | 225.121598     | 5.173E-15 | 1.124733  | up        | PREDICTED: D-lactate dehydrogenase [cytochrome], mitochondrial [Sesamum indicum]        |
| c48916.graph_c1 | 18.8779626    | 18.0631808    | 19.6211929    | 98.9787242     | 99.1660984     | 113.331254     | 8.057E-09 | 1.442101  | up        | BnaC03g39320D [Brassica napus]                                                          |
| c48920.graph_c0 | 7.31708244    | 7.25690332    | 6.71624331    | 24.2302277     | 31.2964202     | 31.2618708     | 3.878E-09 | 1.006054  | up        | PREDICTED: cell division cycle protein 27 homolog B [Sesamum indicum]                   |
| c48922.graph_c1 | 0             | 0             | 0             | 13.8273848     | 32.3337464     | 13.253796      | 1.949E-09 | Inf       | up        | -                                                                                       |
| c48923.graph_c1 | 28.3671846    | 29.6125439    | 28.901986     | 20.4216204     | 23.8095188     | 24.8149235     | 1.881E-18 | -1.352141 | down      | PREDICTED: NAD-dependent protein deacetylase SRT2 [Sesamum indicum]                     |
| c48927.graph_c0 | 39.5444731    | 38.8384806    | 37.9816391    | 33.8421049     | 31.3247217     | 27.475923      | 6.059E-21 | -1.343399 | down      | PREDICTED: coiled-coil domain-containing protein 130-like [Sesamum indicum]             |
| c48938.graph_c0 | 3.07291205    | 3.54204806    | 4.54711875    | 23.2482443     | 18.0852785     | 23.5867886     | 9.205E-07 | 1.521467  | up        | cytochrome b, partial (mitochondrion) [Erythranthe guttata]                             |
| c48940.graph_c0 | 0             | 0             | 0             | 1.30521093     | 0.91200201     | 0.79071921     | 1.542E-09 | Inf       | up        | hypothetical protein AALP_AA3G363600 [Arabis alpina]                                    |
| c48942.graph_c0 | 16.3103917    | 16.7348922    | 16.567985     | 86.5616259     | 124.637543     | 134.975549     | 1.992E-10 | 1.778103  | up        | PREDICTED: heparanase-like protein 2 isoform X1 [Sesamum indicum]                       |
| c48943.graph_c0 | 389.230273    | 381.899263    | 396.053806    | 370.02678      | 301.200626     | 260.337134     | 1.667E-13 | -1.33767  | down      | PREDICTED: DNA mismatch repair protein msh2 isoform X2 [Sesamum indicum]                |
| c48944.graph_c0 | 0             | 0             | 0             | 2.65247696     | 6.18195096     | 6.5226186      | 4.383E-10 | Inf       | up        | hypothetical protein M378DRAFT_109196 [Amanita muscaria Koide BX008]                    |
| c48949.graph_c1 | 26.430601     | 24.8035006    | 25.3767869    | 134.199465     | 154.186391     | 151.10889      | 2.565E-24 | 1.500528  | up        | PREDICTED: palmitoyl-acyl carrier protein thioesterase, chloroplastic [Sesamum indicum] |

| #ID             | 0 h-1<br>FPKM | 0 h-2<br>FPKM | 0 h-3<br>FPKM | 48 h-1<br>FPKM | 48 h-2<br>FPKM | 48 h-3<br>FPKM | FDR       | log2FC    | regulated | nr_annotation                                                                                  |
|-----------------|---------------|---------------|---------------|----------------|----------------|----------------|-----------|-----------|-----------|------------------------------------------------------------------------------------------------|
| c48950.graph_c0 | 245.361664    | 237.41112     | 250.336273    | 116.316974     | 113.841489     | 102.971261     | 1.012E-43 | -2.154515 | down      | PREDICTED: methyl-CpG-binding domain-containing protein 11 [Sesamum indicum]                   |
| c48950.graph_c2 | 0.5818557     | 0.47323115    | 0.37385381    | 10.0508142     | 14.0548569     | 12.6992787     | 6.504E-27 | 3.667876  | up        | hypothetical protein MIMGU_mgv1a004080mg [Erythranthe guttata]                                 |
| c48950.graph_c3 | 9.2544081     | 10.5071213    | 10.9345132    | 2.23157591     | 4.24322784     | 2.39295417     | 1.509E-21 | -2.818516 | down      | -                                                                                              |
| c48952.graph_c2 | 4.05129797    | 4.06505654    | 3.6118725     | 2.7054855      | 2.86613383     | 2.86813277     | 2.347E-17 | -1.491997 | down      | PREDICTED: protein RST1 [Sesamum indicum]                                                      |
| c48953.graph_c1 | 0             | 0             | 0             | 7.31245919     | 9.62464295     | 12.1061863     | 1.042E-26 | Inf       | up        | PREDICTED: protein ECEKIFERUM 1-like [Sesamum indicum]                                         |
| c48956.graph_c2 | 31.8432848    | 30.8904097    | 33.3347329    | 9.94565714     | 9.8034832      | 10.4624601     | 7.028E-71 | -2.687232 | down      | PREDICTED: DEAD-box ATP-dependent RNA helicase 13 [Sesamum indicum]                            |
| c48956.graph_c3 | 64.2968181    | 58.1402709    | 58.0125655    | 11.0907004     | 11.6729584     | 11.3422962     | 2.15E-112 | -3.420938 | down      | PREDICTED: spermatogenesis-associated protein 5 [Sesamum indicum]                              |
| c48957.graph_c1 | 0             | 0             | 0             | 7.79900585     | 20.5493282     | 8.71886966     | 1.345E-05 | Inf       | up        | PREDICTED: adenosylhomocysteinase-like [Pinoenix acutilifera]                                  |
| c48957.graph_c2 | 74.5098353    | 81.0202516    | 69.7018076    | 1167.78978     | 1252.92518     | 1515.86126     | 7.898E-51 | 3.108265  | up        | PREDICTED: uncharacterized protein LOC105169334 [Sesamum indicum]                              |
| c48958.graph_c0 | 1.30096611    | 1.16020314    | 1.55020802    | 0.58837165     | 0.46170994     | 0.60108949     | 1.723E-07 | -2.297968 | down      | PREDICTED: probable plastidic glucose transporter 2 [Sesamum indicum]                          |
| c48960.graph_c0 | 0.49217669    | 0.4187691     | 0.98032313    | 3.49137459     | 3.67467057     | 3.04608585     | 0.0001497 | 1.406942  | up        | PREDICTED: uncharacterized protein LOC105166139 [Sesamum indicum]                              |
| c48962.graph_c0 | 0             | 0             | 0             | 3.52403958     | 4.75146333     | 2.06669108     | 9.776E-08 | Inf       | up        | hyponeucal protein SSIG_02090 [Scierouma scierouorum 10801]                                    |
| c48967.graph_c3 | 47.4255923    | 46.8446461    | 45.8170711    | 33.6663507     | 37.0185066     | 34.3519675     | 2.418E-24 | -1.433784 | down      | PREDICTED: mitochondrial carnitine/acylcarnitine carrier-like protein [Sesamum indicum]        |
| c48971.graph_c0 | 14.8837985    | 14.3502839    | 12.5161687    | 63.6244582     | 68.3529833     | 70.2855285     | 4.503E-18 | 1.25909   | up        | PREDICTED: LOW QUALITY PROTEIN: T-complex protein 1 subunit beta-like [Sesamum indicum]        |
| c48972.graph_c0 | 0.23710249    | 0.75157639    | 0.7109342     | 5.60647981     | 4.35812056     | 4.79425052     | 8.841E-07 | 2.099511  | up        | PREDICTED: subtilisin-like protease SBT3.5 isoform X2 [Sesamum indicum]                        |
| c48978.graph_c0 | 26.86928      | 23.5513447    | 25.3519696    | 16.151073      | 16.4846688     | 14.8589205     | 1.061E-24 | -1.69079  | down      | PREDICTED: LOW QUALITY PROTEIN: ADP-ribosylation factor-binding protein GGA3 [Sesamum indicum] |
| c48979.graph_c0 | 8854.65546    | 8951.01217    | 8042.78709    | 2805.19595     | 2966.13783     | 2995.85732     | 5.82E-35  | -2.577379 | down      | hypothetical protein PHAVU_003G1236000g, partial [Phaseolus vulgaris]                          |
| c48981.graph_c0 | 55.7266216    | 55.5421113    | 59.2322916    | 33.0648585     | 31.0743553     | 31.487264      | 2.045E-38 | -1.851288 | down      | hypothetical protein MIMGU_mgv1a010195mg [Erythranthe guttata]                                 |
| c48982.graph_c0 | 0             | 0             | 0             | 1.49663196     | 5.18890939     | 1.75541498     | 0.0011374 | Inf       | up        | -                                                                                              |
| c48983.graph_c0 | 70.7943042    | 70.8280431    | 67.6041484    | 49.9538154     | 40.6589401     | 37.3751613     | 3.842E-33 | -1.721153 | down      | PREDICTED: protein SPA1-RELATED 4-like isoform X6 [Sesamum indicum]                            |
| c48984.graph_c0 | 204.912448    | 194.785218    | 204.100268    | 148.179763     | 155.791315     | 147.775099     | 9.183E-22 | -1.436686 | down      | PREDICTED: uncharacterized protein LOC105157959 [Sesamum indicum]                              |
| c48986.graph_c0 | 13.0754007    | 12.2623098    | 13.7322002    | 0.52025533     | 0.55114744     | 0.85462167     | 8.795E-83 | -5.365177 | down      | anion exchange family protein [Populus trichocarpa]                                            |

| #ID             | 0 h-1<br>FPKM | 0 h-2<br>FPKM | 0 h-3<br>FPKM | 48 h-1<br>FPKM | 48 h-2<br>FPKM | 48 h-3<br>FPKM | FDR       | log2FC    | regulated | nr_annotation                                                                             |
|-----------------|---------------|---------------|---------------|----------------|----------------|----------------|-----------|-----------|-----------|-------------------------------------------------------------------------------------------|
| c48988.graph_c0 | 0             | 0             | 0             | 35.4756139     | 60.5420436     | 28.9006479     | 9.324E-18 | Inf       | up        | -                                                                                         |
| c48989.graph_c0 | 0             | 0             | 0             | 3.21816473     | 12.5460595     | 4.00890508     | 0.0001279 | Inf       | up        | hypothetical protein COCSADRAFT_262301 [Bipolaris sorokiniana ND90Pr]                     |
| c48990.graph_c0 | 1.30586357    | 1.20584009    | 1.27482532    | 24.8816169     | 27.1099137     | 26.7947855     | 9.73E-100 | 3.359991  | up        | PREDICTED: alpha-glucan water dikinase, chloroplastic-like [Sesamum indicum]              |
| c48992.graph_c0 | 1.75179028    | 1.98735035    | 1.50074657    | 20.980225      | 42.9702752     | 16.6576696     | 0.001225  | 2.919697  | up        | Papain family cysteine protease [Arabidopsis thaliana]                                    |
| c48992.graph_c1 | 1.87943482    | 1.99069568    | 1.57265462    | 54.7825241     | 79.8760487     | 85.3443384     | 6.197E-30 | 4.314472  | up        | PREDICTED: subtilisin-like protease [Sesamum indicum]                                     |
| c49000.graph_c0 | 20.4026732    | 23.3356155    | 19.3331043    | 14.6447486     | 17.730669      | 18.0627958     | 2.072E-17 | -1.342504 | down      | PREDICTED: probable U3 small nucleolar RNA-associated protein 7 [Sesamum indicum]         |
| c49001.graph_c2 | 8.36795122    | 8.6936157     | 9.28681017    | 2.68650541     | 3.15537745     | 3.89745058     | 4.649E-15 | -2.458816 | down      | PREDICTED: uncharacterized protein LOC105156426 [Sesamum indicum]                         |
| c49003.graph_c1 | 2.80076841    | 4.15344142    | 3.15476517    | 1.52903736     | 1.14737935     | 1.4739056      | 1.276E-10 | -2.297828 | down      | hypothetical protein MIMGU_mgv1a000068mg [Erythranthe guttata]                            |
| c49008.graph_c0 | 44.787024     | 41.1119165    | 50.6368468    | 0.64931045     | 0.50026596     | 0.63027549     | 2.62E-117 | -7.277339 | down      | PREDICTED: uncharacterized protein LOC105161665 [Sesamum indicum]                         |
| c49013.graph_c0 | 64.9923843    | 66.5123608    | 57.117181     | 36.6054933     | 39.2966471     | 40.5894057     | 1.683E-33 | -1.712826 | down      | PREDICTED: probable histone-lysine N-methyltransferase ATXR3 isoform X2 [Sesamum indicum] |
| c49015.graph_c1 | 56.4582066    | 56.6532574    | 55.6580211    | 66.7159987     | 52.7155192     | 45.0330712     | 2.152E-13 | -1.048492 | down      | PREDICTED: E3 ubiquitin-protein ligase SINAT5 isoform X1 [Vitis vinifera]                 |
| c49015.graph_c3 | 47.2820439    | 49.031176     | 44.4217278    | 25.7179208     | 23.8303738     | 20.9245038     | 6.494E-46 | -2.011927 | down      | PREDICTED: AR-5 complex subunit mu [Sesamum indicum]                                      |
| c49016.graph_c0 | 0             | 0             | 0             | 0.6427481      | 0.94030936     | 0.59914736     | 8.064E-11 | Inf       | up        | unknown [Picea sitchensis]                                                                |
| c49018.graph_c1 | 4.21720788    | 4.24814869    | 3.77291582    | 39.3680526     | 43.2165646     | 45.0066159     | 2.772E-48 | 2.36378   | up        | hypothetical protein MIMGU_mgv1a008196mg [Erythranthe guttata]                            |
| c49019.graph_c0 | 0             | 0             | 0             | 1.3498108      | 1.38662872     | 1.20105353     | 2.089E-11 | Inf       | up        | hypothetical protein HMPREF1120_05211 [Exophiala dermatitidis NIH/UT8656]                 |
| c49020.graph_c0 | 1.54733418    | 1.67116388    | 1.72675599    | 0              | 0              | 0              | 1.888E-24 | -Inf      | down      | -                                                                                         |
| c49020.graph_c1 | 37.2319069    | 35.4916125    | 34.2295677    | 23.1059376     | 19.4927742     | 17.0429788     | 1.713E-39 | -1.854792 | down      | PREDICTED: uncharacterized protein LOC105161915 [Sesamum indicum]                         |
| c49022.graph_c0 | 8.69725988    | 8.56832509    | 9.67436679    | 197.556796     | 166.846199     | 139.602139     | 4.153E-19 | 3.211758  | up        | PREDICTED: uncharacterized protein LOC105176567 [Sesamum indicum]                         |
| c49022.graph_c1 | 14.803806     | 17.6722172    | 15.1673666    | 14.3754334     | 13.7158879     | 13.119153      | 5.694E-11 | -1.22496  | down      | PREDICTED: ribosomal L1 domain-containing protein 1 [Sesamum indicum]                     |
| c49023.graph_c0 | 17.8032157    | 16.0876892    | 14.9505622    | 3.04100454     | 4.17220442     | 3.23816936     | 5.705E-46 | -3.244546 | down      | PREDICTED: DNA polymerase zeta catalytic subunit [Sesamum indicum]                        |
| c49023.graph_c1 | 36.0681975    | 35.9791453    | 30.405413     | 9.85587426     | 9.80378957     | 8.45079955     | 1.531E-88 | -2.880162 | down      | PREDICTED: DNA polymerase zeta catalytic subunit [Sesamum indicum]                        |



| #ID             | 0 h-1<br>FPKM | 0 h-2<br>FPKM | 0 h-3<br>FPKM | 48 h-1<br>FPKM | 48 h-2<br>FPKM | 48 h-3<br>FPKM | FDR       | log2FC    | regulated | nr_annotation                                                                                                                   |
|-----------------|---------------|---------------|---------------|----------------|----------------|----------------|-----------|-----------|-----------|---------------------------------------------------------------------------------------------------------------------------------|
| c49028.graph_c0 | 14.909801     | 8.67079527    | 10.043641     | 0              | 0              | 0              | 2.277E-42 | -Inf      | down      | alpha-2 macroglobulin family-like protein [Micromonas sp. RCC299]                                                               |
| c49029.graph_c0 | 0             | 0             | 0             | 1.74826597     | 2.77811372     | 1.34818368     | 1.349E-07 | Inf       | up        | ras-related G20 domain toxin substrate 1 (inositol GTP binding protein rac1) [Lichtheimia corymbifera] PREDICTED: β-D-glucanase |
| c49030.graph_c2 | 2432.47793    | 2372.10496    | 2596.92043    | 60.9923576     | 56.6549037     | 48.5136152     | 3.47E-134 | -6.492745 | down      | endotransglucosylase/hydrolase protein 28 [Sesamum indicum]                                                                     |
| c49032.graph_c0 | 17.067669     | 17.748962     | 18.142975     | 84.5963502     | 83.2875618     | 78.8088431     | 4.05E-17  | 1.202553  | up        | PREDICTED: tyrosine--tRNA ligase, cytoplasmic-like [Sesamum indicum]                                                            |
| c49034.graph_c1 | 8.22911111    | 7.20409471    | 7.81130146    | 46.8871748     | 37.6942024     | 36.1024263     | 4.005E-08 | 1.363666  | up        | PREDICTED: probable NOT transcription complex subunit VIP2 isoform X1 [Sesamum indicum]                                         |
| c49035.graph_c1 | 11.325483     | 12.1186736    | 12.2117203    | 1.67899805     | 1.14344669     | 1.70738557     | 3.572E-21 | -3.990603 | down      | PREDICTED: lysine-lysine N-methyltransferase, rat lysine-9 specific SUVH5-like isoform X1 [Sesamum indicum]                     |
| c49038.graph_c1 | 28.0918035    | 25.9105099    | 26.0429075    | 1.66371439     | 2.4152828      | 2.30278699     | 5.065E-93 | -4.672135 | down      | PREDICTED: E3 ubiquitin-protein ligase RING1-like [Sesamum indicum]                                                             |
| c49038.graph_c2 | 1.16361174    | 0.98829557    | 1.08748157    | 45.7709395     | 55.3026529     | 58.8499467     | 2.53E-102 | 4.604252  | up        | ATP-citrate synthase [Camellia sinensis]                                                                                        |
| c49045.graph_c1 | 8.4857651     | 8.25924319    | 8.49089008    | 40.6640894     | 51.9170013     | 49.3524915     | 3.255E-21 | 1.469941  | up        | hypothetical protein MIMGU_mgv1a008892mg [Erythranthe guttata]                                                                  |
| c49047.graph_c0 | 0.25494122    | 0.55292576    | 0.49141434    | 3.75789568     | 4.72747883     | 5.22461403     | 3.094E-07 | 2.373764  | up        | PREDICTED: uncharacterized protein LOC105176173 [Sesamum indicum]                                                               |
| c49050.graph_c0 | 0             | 0             | 0             | 1.71096334     | 4.26958153     | 1.11643026     | 0.0002802 | Inf       | up        | PREDICTED: CBS domain-containing protein CBSX3, mitochondrial-like [Pyrus x bretschneideri]                                     |
| c49051.graph_c0 | 59.9717302    | 58.9440628    | 56.1870667    | 260.279799     | 247.15138      | 253.440021     | 3.331E-15 | 1.103488  | up        | PREDICTED: ethylene-responsive transcription factor RAP2-12-like [Sesamum indicum]                                              |
| c49051.graph_c3 | 6.38798023    | 6.80741073    | 5.57727591    | 3.21001311     | 3.56468464     | 3.55778554     | 1.51E-25  | -1.879167 | down      | alcohol dehydrogenase class III [Solanum lycopersicum]                                                                          |
| c49054.graph_c0 | 0             | 0             | 0             | 1.94863057     | 3.83377021     | 5.03650788     | 1.035E-08 | Inf       | up        | short chain dehydrogenase, putative [Ricinus communis]                                                                          |
| c49058.graph_c0 | 0             | 0             | 0             | 1.8142482      | 4.04007195     | 1.48252696     | 8.769E-06 | Inf       | up        | PREDICTED: proliferation-associated protein 2G4-like isoform X2 [Solanum lycopersicum]                                          |
| c49059.graph_c1 | 20.3157567    | 17.4309427    | 18.6475369    | 144.382115     | 159.092441     | 175.126747     | 3.762E-31 | 2.065594  | up        | PREDICTED: 60S ribosomal protein L35a-3-like [Sesamum indicum]                                                                  |
| c49059.graph_c2 | 46.0043692    | 44.8957786    | 43.7713168    | 40.6944378     | 41.3228159     | 43.1067453     | 2.838E-13 | -1.123676 | down      | PREDICTED: thiosulfate/3-mercaptopyruvate sulfurtransferase 1, mitochondrial-like [Sesamum indicum]                             |
| c49059.graph_c5 | 23.1102402    | 21.1041376    | 19.2773724    | 90.2051675     | 107.828123     | 104.359838     | 9.147E-09 | 1.232855  | up        | unknown [Glycine max]                                                                                                           |
| c49060.graph_c2 | 1.43217298    | 0.86016425    | 1.04289276    | 8.04840812     | 8.52631248     | 9.07896521     | 2.781E-07 | 1.926139  | up        | PREDICTED: probable serine/threonine-protein kinase DDB_G0291350 [Sesamum indicum]                                              |
| c49060.graph_c3 | 21.159166     | 20.9125305    | 21.3740917    | 84.8334371     | 104.928985     | 119.093361     | 8.082E-12 | 1.260903  | up        | PREDICTED: 1,4-alpha-glucan-branching enzyme 2-2, chloroplastic/amyloplastic-like isoform X1 [Nicotiana glauca]                 |

| #ID             | 0 h-1<br>FPKM | 0 h-2<br>FPKM | 0 h-3<br>FPKM | 48 h-1<br>FPKM | 48 h-2<br>FPKM | 48 h-3<br>FPKM | FDR       | log2FC    | regulated | nr_annotation                                                                                 |
|-----------------|---------------|---------------|---------------|----------------|----------------|----------------|-----------|-----------|-----------|-----------------------------------------------------------------------------------------------|
| c49060.graph_c5 | 6.59052495    | 5.15573585    | 5.26649014    | 2.19394725     | 2.37827273     | 2.72394568     | 1.306E-10 | -2.239825 | down      | PREDICTED: uncharacterized protein At1g15400-like [Sesamum indicum]                           |
| c49064.graph_c0 | 218.66595     | 216.272591    | 220.475587    | 147.021952     | 168.202031     | 176.54617      | 1.422E-18 | -1.434875 | down      | PREDICTED: phosphoglucan, water dikinase, chloroplastic [Sesamum indicum]                     |
| c49072.graph_c0 | 13.4745374    | 14.3609506    | 12.7244061    | 10.3144506     | 10.2954551     | 11.5067596     | 4.584E-16 | -1.354128 | down      | PREDICTED: magnesium transporter MRS2-I-like [Sesamum indicum]                                |
| c49074.graph_c0 | 4.37574243    | 5.82016487    | 4.6216457     | 0.49699964     | 0.9360193      | 0.19654546     | 1.22E-21  | -4.206698 | down      | PREDICTED: uncharacterized protein LOC105167219 [Sesamum indicum]                             |
| c49075.graph_c0 | 5.39123566    | 4.22979434    | 5.49242983    | 1.29762144     | 1.75389259     | 1.23424443     | 9.312E-15 | -2.840118 | down      | -                                                                                             |
| c49078.graph_c3 | 4.64072708    | 4.54992117    | 5.39167384    | 30.8937274     | 30.4325338     | 33.0650314     | 8.901E-23 | 1.674894  | up        | hypoteucal protein EUGK50Z_H01809 [Eucalyptus grandis]                                        |
| c49080.graph_c0 | 11.8418121    | 13.0516472    | 12.2223235    | 12.3891889     | 11.4650271     | 12.8568273     | 2.725E-09 | -1.032606 | down      | hypothetical protein MIMGU_mgv1a006759mg [Erythranthe guttata]                                |
| c49080.graph_c1 | 211.977807    | 213.744404    | 211.812821    | 120.5539       | 91.1574238     | 74.5978333     | 1.247E-49 | -2.164999 | down      | hypothetical protein MIMGU_mgv1a009220mg [Erythranthe guttata]                                |
| c49080.graph_c2 | 1.42076941    | 1.19464136    | 0.87635757    | 1.09948058     | 0.94290609     | 0.65220747     | 0.0038364 | -1.381055 | down      | PREDICTED: uncharacterized protein LOC105158955 [Sesamum indicum]                             |
| c49081.graph_c0 | 0             | 0             | 0             | 1.46407123     | 2.83912952     | 1.1040015      | 7.209E-07 | Inf       | up        | S-methyl-5'-thioadenosine phosphorylase [Galdieria sulphuraria]                               |
| c49082.graph_c0 | 7.6777854     | 8.83643818    | 8.38870264    | 4.98888115     | 6.33489769     | 5.53364324     | 4.381E-12 | -1.584285 | down      | PREDICTED: chitin elicitor receptor kinase 1-like isoform X3 [Populus euphratica]             |
| c49084.graph_c0 | 0.14016878    | 0.28061827    | 0.36024486    | 6.13379951     | 6.566417       | 5.4003672      | 3.432E-10 | 3.510076  | up        | PREDICTED: uncharacterized protein LOC105173906 [Sesamum indicum]                             |
| c49085.graph_c0 | 101.41198     | 97.0057601    | 98.2855975    | 20.2208103     | 20.3832981     | 20.5793015     | 7.33E-110 | -3.295279 | down      | -                                                                                             |
| c49085.graph_c1 | 33.6047021    | 30.5007184    | 32.6919676    | 13.6997919     | 14.7978422     | 14.3411676     | 1.102E-33 | -2.194772 | down      | PREDICTED: cellulose synthase A catalytic subunit 2 [UDP-forming]-like [Nicotiana sylvestris] |
| c49086.graph_c0 | 4.32450516    | 3.39287107    | 5.05651527    | 2.97903916     | 3.57418664     | 2.84235025     | 5.981E-06 | -1.46516  | down      | PREDICTED: uncharacterized protein LOC105159651 [Sesamum indicum]                             |
| c49091.graph_c0 | 0             | 0             | 0             | 2.4069545      | 3.51469454     | 2.19957725     | 5.862E-12 | Inf       | up        | -                                                                                             |
| c49094.graph_c0 | 88.2778485    | 84.7222765    | 79.1623751    | 44.37875       | 45.2987392     | 44.4786038     | 4.142E-42 | -1.92709  | down      | PREDICTED: uridine-cytidine kinase C-like isoform X1 [Sesamum indicum]                        |
| c49097.graph_c1 | 11.4378988    | 11.6163219    | 11.8503857    | 3.90759634     | 5.55825987     | 5.56703586     | 1.538E-36 | -2.239456 | down      | PREDICTED: probable galacturonosyltransferase 14 [Sesamum indicum]                            |
| c49099.graph_c0 | 131.282506    | 133.492378    | 116.369645    | 36.2099729     | 40.2087539     | 36.4595988     | 5.698E-81 | -2.772921 | down      | PREDICTED: uncharacterized protein LOC105161154 isoform X1 [Sesamum indicum]                  |
| c49103.graph_c5 | 16.4305875    | 17.1247313    | 14.1540462    | 158.70986      | 178.731164     | 174.901622     | 7.019E-63 | 2.406984  | up        | PREDICTED: V-type proton ATPase catalytic subunit A [Sesamum indicum]                         |
| c49105.graph_c0 | 0.10531272    | 0             | 0             | 13.9710167     | 17.6784922     | 32.3732464     | 4.844E-10 | 8.242913  | up        | predicted protein [Micromonas sp. RCC299]                                                     |

| #ID             | 0 h-1<br>FPKM | 0 h-2<br>FPKM | 0 h-3<br>FPKM | 48 h-1<br>FPKM | 48 h-2<br>FPKM | 48 h-3<br>FPKM | FDR       | log2FC    | regulated | nr_annotation                                                                                          |
|-----------------|---------------|---------------|---------------|----------------|----------------|----------------|-----------|-----------|-----------|--------------------------------------------------------------------------------------------------------|
| c49108.graph_c0 | 0             | 0             | 0             | 1.81929642     | 3.23398427     | 0.74080633     | 9.131E-05 | Inf       | up        | predicted protein [Micromonas pusilla CCMP1545]                                                        |
| c49109.graph_c0 | 12.8755917    | 12.205651     | 12.3270534    | 55.4599696     | 57.2135484     | 62.4538117     | 9.083E-18 | 1.208553  | up        | PREDICTED: transmembrane protein 56-B-like [Sesamum indicum]                                           |
| c49112.graph_c0 | 358.668528    | 352.973443    | 347.767126    | 92.3056071     | 88.0970377     | 85.8981817     | 2.265E-76 | -3.008158 | down      | PREDICTED: 110S complex subunit 4D [Solanum lycopersicum]                                              |
| c49114.graph_c0 | 5.4511327     | 5.00628997    | 5.44071561    | 38.7371896     | 36.6469523     | 34.6633437     | 8.006E-29 | 1.775003  | up        | PREDICTED: signal recognition particle subunit SRP68 [Sesamum indicum]                                 |
| c49115.graph_c1 | 0.46621198    | 0.46667882    | 0.68468669    | 2.69974498     | 4.16007629     | 3.43953777     | 0.0013504 | 1.642174  | up        | ALA-interacting subunit 5 [Arabidopsis thaliana]                                                       |
| c49119.graph_c0 | 43.201845     | 43.689934     | 45.0633665    | 17.6040043     | 20.7046917     | 19.7501816     | 2.996E-53 | -2.205021 | down      | PREDICTED: pentatricopeptide repeat-containing protein At1g62680, mitochondrial-like [Sesamum indicum] |
| c49119.graph_c1 | 45.3333087    | 46.8687501    | 47.5605041    | 42.6366814     | 40.9421115     | 38.6034393     | 3.652E-15 | -1.210499 | down      | PREDICTED: cytochrome-2-like isoform A3 [Nicotiana glauca]                                             |
| c49121.graph_c0 | 4.1242365     | 3.91108386    | 1.67362332    | 89.188631      | 127.532944     | 125.97877      | 2.145E-33 | 4.125699  | up        | PREDICTED: uncharacterized protein LOC105160017 [Sesamum indicum]                                      |
| c49124.graph_c0 | 0             | 0             | 0             | 8.393718       | 8.6005813      | 5.38724445     | 8.683E-18 | Inf       | up        | -                                                                                                      |
| c49128.graph_c4 | 12.2497484    | 12.8202852    | 11.7228724    | 4.36730666     | 4.84046777     | 5.42081119     | 5.645E-45 | -2.35021  | down      | PREDICTED: uncharacterized protein LOC105173091 [Sesamum indicum]                                      |
| c49132.graph_c3 | 1.79096041    | 1.51263601    | 2.01377316    | 0              | 0.05462255     | 0              | 2.714E-20 | -7.659828 | down      | -                                                                                                      |
| c49134.graph_c0 | 1.2336301     | 2.14759198    | 1.58526351    | 0.93884825     | 0.05234715     | 0.48364193     | 3.471E-07 | -2.741352 | down      | retrotransposon protein, putative, unclassified [Oryza sativa Japonica Group]                          |
| c49138.graph_c0 | 0             | 0             | 0             | 2.09898257     | 3.74504003     | 2.26085408     | 2.573E-10 | Inf       | up        | -                                                                                                      |
| c49138.graph_c1 | 109.845277    | 111.347893    | 106.94925     | 67.8726648     | 75.7046881     | 74.8889618     | 6.232E-29 | -1.605984 | down      | PREDICTED: uncharacterized protein LOC105179211 isoform X1 [Sesamum indicum]                           |
| c49138.graph_c2 | 29.5557684    | 30.2277262    | 28.6972984    | 8.88479967     | 8.37450225     | 8.40162262     | 8.775E-81 | -2.801666 | down      | hypothetical protein MIMGU_mgv1a026550mg, partial [Erythranthe guttata]                                |
| c49142.graph_c0 | 268.274287    | 287.897936    | 262.634416    | 1589.64515     | 1313.00922     | 1084.57255     | 1.988E-05 | 1.272245  | up        | PREDICTED: 4-coumarate--CoA ligase-like 1 [Sesamum indicum]                                            |
| c49142.graph_c4 | 10.6228811    | 10.7155248    | 10.3872584    | 54.1904921     | 56.448786      | 59.3887401     | 5.695E-22 | 1.403738  | up        | hypothetical protein MIMGU_mgv1a002611mg [Erythranthe guttata]                                         |
| c49145.graph_c0 | 0             | 0             | 0             | 1.01005767     | 1.48615781     | 0.79888288     | 9.173E-10 | Inf       | up        | hypothetical protein SELMODRAFT_166421 [Selaginella moellendorffii]                                    |
| c49146.graph_c0 | 18.8429163    | 20.460241     | 17.1002073    | 15.0545546     | 10.8054815     | 10.9956154     | 1.444E-18 | -1.623385 | down      | PREDICTED: beta-galactosidase 3 [Sesamum indicum]                                                      |
| c49148.graph_c0 | 0             | 0             | 0             | 1.59301513     | 1.32073542     | 1.60234076     | 4.331E-10 | Inf       | up        | --                                                                                                     |
| c49149.graph_c0 | 0             | 0             | 0             | 1.13602362     | 1.03499218     | 0.80866159     | 3.694E-12 | Inf       | up        | --                                                                                                     |
| c49150.graph_c0 | 0             | 0             | 0             | 1.34682237     | 1.56947449     | 1.37815362     | 8.473E-10 | Inf       | up        | predicted protein [Physcomitrella patens]                                                              |
| c49152.graph_c0 | 143.379752    | 132.474897    | 143.607577    | 131.797461     | 119.270311     | 111.269763     | 5.382E-18 | -1.226417 | down      | PREDICTED: xyloglucan galactosyltransferase KATAMARI1 homolog [Sesamum indicum]                        |
| c49154.graph_c0 | 87.9182565    | 90.2744968    | 89.7898008    | 88.1695329     | 79.1308223     | 76.8316566     | 3.079E-16 | -1.149645 | down      | PREDICTED: uncharacterized protein LOC105158432 [Sesamum indicum]                                      |

| #ID             | 0 h-1<br>FPKM | 0 h-2<br>FPKM | 0 h-3<br>FPKM | 48 h-1<br>FPKM | 48 h-2<br>FPKM | 48 h-3<br>FPKM | FDR       | log2FC    | regulated | nr_annotation                                                                                         |
|-----------------|---------------|---------------|---------------|----------------|----------------|----------------|-----------|-----------|-----------|-------------------------------------------------------------------------------------------------------|
| c49154.graph_c1 | 102.157883    | 108.387619    | 101.910049    | 102.385553     | 88.6838098     | 80.2857719     | 4.217E-16 | -1.216969 | down      | hypothetical protein MIMGU_mgv1a005704mg [Erythranthe guttata]                                        |
| c49158.graph_c0 | 0             | 0             | 0             | 22.8996653     | 42.9387754     | 22.8357282     | 3.806E-19 | Inf       | up        | S-adenosyl-methionine synthetase [Undaria pinnatifida]                                                |
| c49159.graph_c0 | 19.1985957    | 19.0516719    | 18.6276379    | 111.27008      | 124.302894     | 139.871265     | 1.764E-31 | 1.702555  | up        | PREDICTED: DNA ngase 1-like isoform A2 [Sesamum indicum]                                              |
| c49159.graph_c1 | 0             | 0.6754867     | 0.43357941    | 7.46015871     | 7.40918771     | 4.28704448     | 3.979E-06 | 3.091222  | up        | -                                                                                                     |
| c49160.graph_c0 | 472.266599    | 439.129256    | 451.413504    | 302.921343     | 251.269474     | 213.151817     | 4.698E-28 | -1.84077  | down      | PREDICTED: G-type lectin 5-receptor-like serine/threonine-protein kinase At1g11300 [Sesamum indicum]  |
| c49161.graph_c0 | 20.2874361    | 20.4244621    | 18.4289052    | 6.55227974     | 6.25859055     | 5.30450722     | 2.52E-39  | -2.721126 | down      | hypothetical protein CICLE_V10004550mg [Citrus clamentina]                                            |
| c49162.graph_c0 | 123.546295    | 120.695891    | 122.63301     | 491.798989     | 497.240823     | 589.076631     | 1.34E-13  | 1.085863  | up        | PREDICTED: uncharacterized protein At1g04910-like [Sesamum indicum]                                   |
| c49163.graph_c0 | 0.95841634    | 1.26463206    | 0.8117383     | 3.53182258     | 6.16503382     | 7.58865147     | 0.0026735 | 1.484419  | up        | putative retroelement pol polyprotein [Arabidopsis thaliana]                                          |
| c49165.graph_c0 | 202.012994    | 190.75215     | 186.988449    | 157.378365     | 145.986797     | 136.232837     | 1.29E-22  | -1.414021 | down      | PREDICTED: UDP-D-apiiose/UDP-D-xylose synthase 2 isoform X1 [Phoenix dactylifera]                     |
| c49168.graph_c0 | 19.5656038    | 20.2420905    | 18.0526815    | 82.982682      | 99.6994349     | 146.619023     | 0.0001466 | 1.486054  | up        | PREDICTED: kinesin-like protein NACK1 [Sesamum indicum]                                               |
| c49169.graph_c1 | 57.2586257    | 52.1416039    | 64.3821508    | 57.1462457     | 31.8220543     | 40.7438989     | 2.983E-07 | -1.431337 | down      | hypothetical protein (mitochondrion) [Vicia faba]                                                     |
| c49169.graph_c2 | 303.595306    | 327.392522    | 335.249452    | 386.501771     | 190.717027     | 252.253479     | 5.511E-07 | -1.226422 | down      | Cell wall-associated hydrolase, partial [Medicago truncatula]                                         |
| c49170.graph_c0 | 20.5873319    | 20.7043961    | 18.4487127    | 6.7462365      | 8.46333894     | 7.34548345     | 4.649E-48 | -2.424755 | down      | PREDICTED: type I inositol 1,4,5-trisphosphate 5-phosphatase 1-like isoform X2 [Sesamum indicum]      |
| c49171.graph_c0 | 0             | 0             | 0             | 2.70405513     | 7.16154633     | 2.1052955      | 0.0004368 | Inf       | up        | -                                                                                                     |
| c49172.graph_c1 | 0             | 0             | 0             | 9.06522565     | 11.7658865     | 8.06618327     | 7.758E-25 | Inf       | up        | predicted protein [Hordeum vulgare subsp. vulgare]                                                    |
| c49172.graph_c2 | 0             | 0             | 0             | 5.52884024     | 6.7294752      | 4.08216219     | 2.276E-12 | Inf       | up        | neat snock protein 5 [Scnizosaccnaromyces japonicus VES2751]                                          |
| c49175.graph_c0 | 0.06271153    | 0             | 0.0805868     | 24.5539295     | 57.2874086     | 19.4832207     | 8.72E-08  | 8.429019  | up        | 60S ribosomal protein L7a, putative [Ricinus communis]                                                |
| c49177.graph_c0 | 0             | 0             | 0             | 20.9034141     | 33.9606119     | 26.5115585     | 2.04E-33  | Inf       | up        | 40S ribosomal protein S12 [Biumeria graminis f. sp. noruei NH11]                                      |
| c49179.graph_c2 | 36.4475922    | 37.3449011    | 38.1433725    | 17.5877946     | 18.3383859     | 18.7629682     | 1.7E-46   | -2.052143 | down      | hypothetical protein MIMGU_mgv1a003978mg [Erythranthe guttata]                                        |
| c49183.graph_c0 | 1.43862561    | 1.23434244    | 1.18844413    | 0.47334134     | 0.55159253     | 0.7581173      | 2.324E-05 | -2.135946 | down      | -                                                                                                     |
| c49183.graph_c1 | 7.72243628    | 8.58048773    | 8.15722909    | 3.32954481     | 4.4015244      | 4.10207394     | 1.098E-33 | -2.06988  | down      | PREDICTED: mitochondrial fission protein ELM1 [Sesamum indicum]                                       |
| c49185.graph_c0 | 0             | 0             | 0             | 30.4295392     | 50.1711523     | 26.6885288     | 2.187E-21 | Inf       | up        | hypothetical protein CHELNDKAF1_59000 [Cniorena variabilis]                                           |
| c49189.graph_c0 | 20.1221532    | 16.9169011    | 18.3370415    | 11.2680988     | 10.4931701     | 11.9668582     | 9.255E-26 | -1.732022 | down      | PREDICTED: josephin-like protein [Sesamum indicum]                                                    |
| c49191.graph_c0 | 0             | 0             | 0             | 5.29891978     | 10.395487      | 1.65896282     | 0.0001502 | Inf       | up        | putative salivary secreted peptide [Trichosporon asahii var. asahii CBS 8904]                         |
| c49192.graph_c0 | 1.45165346    | 1.78401264    | 1.90237142    | 8.30221161     | 6.99967794     | 6.11481162     | 3.972E-05 | 1.044406  | up        | PREDICTED: 2-oxoisovalerate dehydrogenase subunit alpha 1, mitochondrial isoform X1 [Sesamum indicum] |

| #ID             | 0 h-1<br>FPKM | 0 h-2<br>FPKM | 0 h-3<br>FPKM | 48 h-1<br>FPKM | 48 h-2<br>FPKM | 48 h-3<br>FPKM | FDR       | log2FC    | regulated | nr_annotation                                                                                |
|-----------------|---------------|---------------|---------------|----------------|----------------|----------------|-----------|-----------|-----------|----------------------------------------------------------------------------------------------|
| c49193.graph_c0 | 1.527031      | 1.22856231    | 1.44879746    | 0.74941712     | 0.7103464      | 0.87740374     | 7.925E-08 | -1.865457 | down      | PREDICTED: probable ubiquitin conjugation factor E4 [Sesamum indicum]                        |
| c49194.graph_c1 | 0.17018834    | 0.13628701    | 0.13121925    | 1.53652828     | 1.561326       | 1.08817452     | 9.419E-05 | 2.244476  | up        | -                                                                                            |
| c49197.graph_c1 | 49.0470471    | 51.2891769    | 48.7045885    | 243.915051     | 217.131647     | 214.452544     | 5.448E-16 | 1.165482  | up        | PREDICTED: LOW QUALITY PROTEIN: uncharacterized protein LOC101209660 [Cucumis sativus]       |
| c49197.graph_c2 | 2.13997294    | 1.80132465    | 1.06248066    | 0              | 0              | 0.03986849     | 4.678E-16 | -8.006223 | down      | -                                                                                            |
| c49199.graph_c0 | 36.1157866    | 38.600282     | 29.3574707    | 19.2010424     | 23.7186748     | 27.7710782     | 2.263E-17 | -1.578077 | down      | PREDICTED: ABC transporter C family member 3-like [Sesamum indicum]                          |
| c49213.graph_c0 | 0             | 0             | 0             | 1.64957926     | 3.58951945     | 1.9834942      | 8.501E-08 | Inf       | up        | predicted protein [Bathycoccus prasinos]                                                     |
| c49217.graph_c0 | 0             | 0             | 0             | 2.4112192      | 4.55648724     | 1.39166811     | 6.586E-05 | Inf       | up        | conserved unknown protein [Ectocarpus siliculosus]                                           |
| c49218.graph_c0 | 16.3324169    | 14.0230768    | 15.3261823    | 15.1416183     | 14.4786291     | 13.7973997     | 1.244E-13 | -1.089361 | down      | PREDICTED: F-box protein 7 [Sesamum indicum]                                                 |
| c49221.graph_c0 | 76.4187236    | 74.4084694    | 75.0094027    | 61.6771238     | 69.5830092     | 81.5875173     | 1.312E-14 | -1.10625  | down      | PREDICTED: mannosyl-oligosaccharide 1,2-alpha-mannosidase MNS3 [Sesamum indicum]             |
| c49225.graph_c0 | 0             | 0             | 0             | 1.22617353     | 1.94847326     | 1.04144902     | 6.331E-08 | Inf       | up        | PREDICTED: V-type proton ATPase subunit E3 [Tarenaya hassleriana]                            |
| c49230.graph_c0 | 34.3969378    | 35.601853     | 36.1374839    | 25.3330082     | 26.7801903     | 24.8735532     | 1.321E-25 | -1.481573 | down      | PREDICTED: protein INLF / isoform X1 [Sesamum indicum]                                       |
| c49230.graph_c1 | 39.8531658    | 41.0831385    | 41.0500256    | 12.0479636     | 18.312642      | 20.0421235     | 2.42E-47  | -2.30082  | down      | PREDICTED: uncharacterized protein LOC105156041 [Sesamum indicum]                            |
| c49231.graph_c0 | 1.06036903    | 1.06143083    | 0.93679863    | 11.7225734     | 13.7769344     | 16.8955209     | 3.33E-13  | 2.772328  | up        | PREDICTED: methyl-CpG-binding domain-containing protein 13-like isoform X1 [Sesamum indicum] |
| c49233.graph_c1 | 9.14926237    | 9.11034825    | 9.56619673    | 45.9939039     | 47.9046785     | 48.956576      | 2.91E-20  | 1.341186  | up        | PREDICTED: pentatricopeptide repeat-containing protein At4g02750 [Sesamum indicum]           |
| c49233.graph_c4 | 71.7541522    | 73.4450319    | 74.4457562    | 44.1600436     | 56.3969605     | 56.7704409     | 4.628E-19 | -1.503719 | down      | -                                                                                            |
| c49238.graph_c0 | 19.7238033    | 20.0019772    | 18.3458967    | 17.6000419     | 15.117657      | 13.3113497     | 2.977E-19 | -1.347822 | down      | PREDICTED: guanine nucleotide-binding protein alpha-1 subunit [Sesamum indicum]              |
| c49238.graph_c1 | 265.148778    | 266.512525    | 279.593719    | 326.16042      | 258.022124     | 195.059547     | 5.425E-09 | -1.069107 | down      | PREDICTED: uncharacterized protein LOC105157579 [Sesamum indicum]                            |
| c49239.graph_c1 | 57.7586141    | 58.1576098    | 53.7923488    | 40.2083834     | 43.3394274     | 43.7313138     | 4.052E-24 | -1.433188 | down      | hypothetical protein MIMGU_mgv1a000365mg [Erythranthe guttata]                               |
| c49244.graph_c1 | 25.2409747    | 25.8404827    | 25.8625178    | 20.1707643     | 20.7619501     | 20.8868791     | 3.013E-16 | -1.333936 | down      | PREDICTED: protein ENHANCED DISEASE RESISTANCE 2 [Sesamum indicum]                           |
| c49245.graph_c0 | 4.99249682    | 5.64934336    | 5.29980719    | 89.58858       | 97.2385735     | 101.601522     | 4.513E-29 | 3.157878  | up        | -                                                                                            |
| c49245.graph_c1 | 0.2508391     | 0.70305278    | 0.58020872    | 6.7478088      | 4.16178934     | 4.81155263     | 7.836E-06 | 2.344812  | up        | PREDICTED: protein PLANT CADMIUM RESISTANCE 6 [Sesamum indicum]                              |
| c49245.graph_c3 | 85.9601126    | 92.9550067    | 71.1150471    | 30.0583011     | 29.3936541     | 30.4489457     | 1.694E-38 | -2.490676 | down      | hypothetical protein JCGZ_25510 [Jatropha curcas]                                            |

| #ID             | 0 h-1<br>FPKM | 0 h-2<br>FPKM | 0 h-3<br>FPKM | 48 h-1<br>FPKM | 48 h-2<br>FPKM | 48 h-3<br>FPKM | FDR       | log2FC    | regulated | nr_annotation                                                                                               |
|-----------------|---------------|---------------|---------------|----------------|----------------|----------------|-----------|-----------|-----------|-------------------------------------------------------------------------------------------------------------|
| c49246.graph_c0 | 0.96759881    | 0.70137662    | 1.02902298    | 21.9011476     | 24.5530023     | 22.9610725     | 1.542E-86 | 3.664291  | up        | PREDICTED: uncharacterized protein LOC105164785 isoform X2 [Sesamum indicum]                                |
| c49248.graph_c0 | 0             | 0             | 0             | 2.72892871     | 5.595424       | 4.50389034     | 2.932E-13 | Inf       | up        | -                                                                                                           |
| c49249.graph_c2 | 5.21867007    | 5.51411221    | 5.29044481    | 26.2825266     | 27.2772323     | 26.760848      | 4.343E-09 | 1.307688  | up        | PREDICTED: 15 kDa selenoprotein [Sesamum indicum]                                                           |
| c49250.graph_c0 | 0.02842689    | 0             | 0             | 0.9689821      | 1.33170038     | 0.72237913     | 3.674E-09 | 5.73421   | up        | ADP-glucose pyrophosphorylase beta subunit IbAGPb1A [Ipomoea batatas]                                       |
| c49251.graph_c0 | 0             | 0             | 0             | 1.19933789     | 5.03986052     | 2.95248609     | 2.816E-05 | Inf       | up        | -                                                                                                           |
| c49255.graph_c1 | 21.9081039    | 21.3548273    | 23.5683389    | 17.6464911     | 20.0262878     | 19.5879228     | 6.06E-17  | -1.243545 | down      | PREDICTED: uncharacterized protein LOC105170478 isoform X2 [Sesamum indicum]                                |
| c49255.graph_c2 | 1233.81734    | 1168.46724    | 1280.4424     | 813.11441      | 526.675448     | 367.118111     | 1.923E-31 | -2.115529 | down      | PREDICTED: rop guanine nucleotide exchange factor 7-like isoform X1 [Sesamum indicum]                       |
| c49256.graph_c0 | 2.12491994    | 0.96683988    | 1.48942159    | 17.8854811     | 17.4392399     | 18.6855566     | 9.267E-11 | 2.543579  | up        | PREDICTED: uncharacterized protein LOC105160829 [Sesamum indicum]                                           |
| c49257.graph_c0 | 18.0550498    | 19.5696303    | 18.805        | 14.2232227     | 12.6546903     | 12.9621153     | 5.251E-22 | -1.517662 | down      | PREDICTED: regulation of nuclear pre-mRNA domain-containing protein 1B-like [Sesamum indicum]               |
| c49257.graph_c1 | 16.9616975    | 16.4120265    | 15.815226     | 87.518433      | 82.3407271     | 82.5825577     | 7.572E-22 | 1.343936  | up        | PREDICTED: uncharacterized protein LOC105163499 [Sesamum indicum]                                           |
| c49257.graph_c2 | 2.6646774     | 2.13387653    | 2.22574037    | 11.7424836     | 14.9536915     | 14.7806511     | 3.077E-08 | 1.54122   | up        | PREDICTED: uncharacterized protein LOC105174437 [Sesamum indicum]                                           |
| c49258.graph_c1 | 42.6192204    | 38.4618197    | 42.3361376    | 32.6779143     | 20.6268878     | 17.6115731     | 1.132E-22 | -1.806242 | down      | PREDICTED: probable serine/threonine-protein kinase NAK [Sesamum indicum]                                   |
| c49260.graph_c1 | 0             | 0             | 0             | 15.8156428     | 14.972335      | 9.88080655     | 7.745E-12 | Inf       | up        | predicted protein [Physcomitrella patens]                                                                   |
| c49260.graph_c2 | 37004.0695    | 37864.8467    | 39206.8195    | 9069.95781     | 3937.25311     | 4954.4692      | 7.751E-14 | -3.669722 | down      | hypothetical protein MTR_5g051050, partial [Medicago truncatula]                                            |
| c49262.graph_c0 | 38.0841397    | 39.5639604    | 36.6981106    | 27.1624287     | 29.618679      | 26.4796066     | 7.551E-26 | -1.475406 | down      | PREDICTED: probable LRR receptor-like serine/threonine-protein kinase At1g56140 [Nicotiana tomentosiformis] |
| c49266.graph_c0 | 35.7557528    | 36.7780297    | 36.5911811    | 14.8467377     | 14.1781172     | 12.9349224     | 8.61E-62  | -2.394841 | down      | PREDICTED: C2 and GRAM domain-containing protein At1g03370 isoform X1 [Sesamum indicum]                     |
| c49268.graph_c1 | 1.92083326    | 2.16310127    | 3.18828127    | 172.240764     | 184.577211     | 188.752378     | 6.55E-165 | 5.204999  | up        | PREDICTED: auxin-responsive protein IAA14 [Sesamum indicum]                                                 |
| c49270.graph_c0 | 10.7192501    | 10.1701586    | 10.4208303    | 61.2266886     | 50.5343355     | 47.2585521     | 1.448E-08 | 1.33158   | up        | PREDICTED: ultraviolet-B receptor UVR8 isoform X2 [Sesamum indicum]                                         |
| c49273.graph_c1 | 25.5562439    | 26.4904791    | 25.124098     | 23.9300473     | 23.0339581     | 21.350051      | 1.931E-11 | -1.191625 | down      | hypothetical protein MIMGU_mgv1a007843mg [Erythranthe guttata]                                              |
| c49275.graph_c0 | 14.2492332    | 12.783624     | 11.6413216    | 59.9857806     | 64.4072428     | 71.0119391     | 2.047E-19 | 1.319276  | up        | PREDICTED: cyclic pyranopterin monophosphate synthase, mitochondrial [Sesamum indicum]                      |
| c49275.graph_c1 | 3.37275195    | 2.5932587     | 3.70598648    | 2.83700786     | 3.91187614     | 3.04525067     | 0.0093063 | -1.005712 | down      | hypothetical protein CICLE_v10022528mg [Citrus Clementina]                                                  |

| #ID             | 0 h-1<br>FPKM | 0 h-2<br>FPKM | 0 h-3<br>FPKM | 48 h-1<br>FPKM | 48 h-2<br>FPKM | 48 h-3<br>FPKM | FDR       | log2FC    | regulated | nr_annotation                                                                                     |
|-----------------|---------------|---------------|---------------|----------------|----------------|----------------|-----------|-----------|-----------|---------------------------------------------------------------------------------------------------|
| c49275.graph_c2 | 31.8384719    | 27.6126244    | 30.4642262    | 14.2048298     | 14.7430555     | 11.5625899     | 2.011E-46 | -2.166678 | down      | hypothetical protein MIMGU_mgv1a010148mg<br>[Erythranthe guttata]                                 |
| c49277.graph_c0 | 7.4625693     | 9.28615305    | 8.05006675    | 1.73451976     | 1.83751336     | 2.83417982     | 3.27E-32  | -2.974626 | down      | PREDICTED: cyclic pyranopterin monophosphate synthase,<br>mitochondrial [Sesamum indicum]         |
| c49280.graph_c0 | 49.5763299    | 46.0856972    | 48.5182005    | 44.6154399     | 41.6025799     | 37.3334219     | 1.575E-18 | -1.237994 | down      | PREDICTED: nuclear pore complex protein NUP35<br>[Sesamum indicum]                                |
| c49281.graph_c0 | 15.6738367    | 15.3750791    | 16.9545544    | 8.92584365     | 10.811295      | 10.5308189     | 2.464E-29 | -1.687123 | down      | PREDICTED: peroxisome biogenesis protein 1 isoform X2<br>[Sesamum indicum]                        |
| c49284.graph_c2 | 63.9069131    | 67.2292996    | 56.1713899    | 52.8469331     | 59.2914964     | 53.1764279     | 4.783E-18 | -1.197454 | down      | PREDICTED: probable glycerol-3-phosphate<br>dehydrogenase [NAD(+)] 1, cytosolic [Sesamum indicum] |
| c49285.graph_c0 | 3.15042979    | 3.40928051    | 3.22779992    | 15.2571131     | 18.2405756     | 14.0293737     | 3.767E-07 | 1.260778  | up        | PREDICTED: carotenoid 9,10(9&apos;,10&apos;)-cleavage<br>dioxygenase 1 [Nelumbo nucifera]         |
| c49287.graph_c0 | 271.677864    | 218.103826    | 265.328776    | 7.75890842     | 5.56813148     | 6.45842166     | 4.21E-109 | -6.266751 | down      | PREDICTED: peroxygenase-like [Solanum lycopersicum]                                               |
| c49287.graph_c1 | 178.244103    | 178.37497     | 185.343425    | 19.1293584     | 21.0312755     | 22.1879863     | 3.35E-145 | -4.139813 | down      | PREDICTED: probable helicase DDB_G0274399 isoform<br>X1 [Sesamum indicum]                         |
| c49288.graph_c0 | 6.55130786    | 5.84677388    | 5.17292998    | 2.61780381     | 2.77324571     | 3.42925618     | 1.842E-07 | -2.012363 | down      | PREDICTED: GPI-anchored protein LORELEI-like [Pyrus<br>x bretschneideri]                          |
| c49288.graph_c3 | 26.2166147    | 27.550227     | 23.291934     | 7.01389653     | 4.38360912     | 3.73410872     | 1.412E-91 | -3.353285 | down      | PREDICTED: probable protein phosphatase 2C 25<br>[Sesamum indicum]                                |
| c49289.graph_c0 | 146.296335    | 153.475486    | 135.25508     | 100.81988      | 106.902114     | 110.040089     | 4.922E-24 | -1.470891 | down      | PREDICTED: BTB/POZ domain-containing protein<br>At5g17580 [Sesamum indicum]                       |
| c49290.graph_c0 | 189.868841    | 179.435037    | 181.311991    | 95.080608      | 96.0042312     | 93.7820466     | 9.003E-41 | -1.96789  | down      | PREDICTED: probable acyl-activating enzyme 18,<br>peroxisomal isoform X2 [Vitis vinifera]         |
| c49292.graph_c0 | 0             | 0             | 0             | 1.35010964     | 1.73876867     | 0.61243736     | 2.086E-06 | Inf       | up        | phosphoenolpyruvate carboxylase [Neocammasus<br>frontalis]                                        |
| c49295.graph_c0 | 0             | 0             | 0             | 2.37823189     | 4.01245472     | 2.78232754     | 9.737E-15 | Inf       | up        | unknown [Picea sitchensis]                                                                        |
| c49303.graph_c0 | 0             | 0             | 0             | 1.17887243     | 0.90989274     | 0.92907319     | 8.932E-14 | Inf       | up        | PREDICTED: delta-1-pyrroline-5-carboxylate synthase<br>[Brachypodium distachyon]                  |
| c49306.graph_c0 | 22.6785808    | 22.3437894    | 23.1060099    | 2.96121088     | 2.25223662     | 2.53352657     | 1.06E-153 | -4.149753 | down      | unnamed protein product [Coffea canephora]                                                        |
| c49307.graph_c0 | 54.4230837    | 56.9109965    | 51.6257427    | 1648.3562      | 1087.81311     | 791.565076     | 3.736E-06 | 3.430642  | up        | PREDICTED: pentatricopeptide repeat-containing protein<br>At3g21470 [Sesamum indicum]             |
| c49309.graph_c0 | 0             | 0             | 0             | 1.25436984     | 1.32885275     | 0.93010895     | 2.281E-11 | Inf       | up        | hypothetical protein EMIHUDDRAFT_452099 [Emiliania<br>huxleyi CCMP1516]                           |
| c49310.graph_c0 | 0             | 0             | 0             | 1.24100868     | 1.23957261     | 1.10424206     | 1.829E-11 | Inf       | up        | hypothetical protein FINEG_02950 [Pneumocystis murina<br>R1721]                                   |
| c49311.graph_c0 | 0             | 0             | 0             | 2.09781347     | 2.38112035     | 1.99995194     | 1.541E-13 | Inf       | up        | glucokinase [Galdieria sulphuraria]                                                               |
| c49315.graph_c0 | 0             | 0             | 0             | 3.35533099     | 4.86821041     | 2.79084334     | 5.021E-12 | Inf       | up        | PREDICTED: T-complex protein 1 subunit beta [Phoenix<br>dactylifera]                              |
| c49316.graph_c1 | 0             | 0             | 0             | 3.07641438     | 3.76605725     | 3.71066391     | 6.112E-13 | Inf       | up        | hypothetical protein MG5_02709 [Candida albicans P57072]                                          |

| #ID             | 0 h-1<br>FPKM | 0 h-2<br>FPKM | 0 h-3<br>FPKM | 48 h-1<br>FPKM | 48 h-2<br>FPKM | 48 h-3<br>FPKM | FDR       | log2FC    | regulated | nr_annotation                                                                                      |
|-----------------|---------------|---------------|---------------|----------------|----------------|----------------|-----------|-----------|-----------|----------------------------------------------------------------------------------------------------|
| c49321.graph_c0 | 19.0625171    | 20.768629     | 18.7013154    | 13.8059202     | 17.5375016     | 16.7463967     | 1.52E-18  | -1.304517 | down      | PREDICTED: serine hydroxymethyltransferase 6-like [Sesamum indicum]                                |
| c49322.graph_c1 | 2.90130667    | 4.44900545    | 3.56964314    | 19.904373      | 23.0744037     | 22.0625859     | 3.512E-09 | 1.554143  | up        | -                                                                                                  |
| c49327.graph_c0 | 53.1430843    | 54.9243317    | 49.7175641    | 26.7870535     | 28.6749561     | 25.4997991     | 8.65E-44  | -1.979661 | down      | PREDICTED: chromodomain-helicase-DNA-binding protein 4-like isoform X4 [Sesamum indicum]           |
| c49328.graph_c0 | 115.048104    | 123.448797    | 105.787476    | 33.217712      | 32.5732271     | 31.3180487     | 4.071E-77 | -2.841484 | down      | PREDICTED: uncharacterized protein LOC105166619 [Sesamum indicum]                                  |
| c49330.graph_c0 | 186.515212    | 187.99822     | 181.881244    | 135.761987     | 147.362075     | 134.706023     | 8.607E-23 | -1.431213 | down      | PREDICTED: membrin-11 [Sesamum indicum]                                                            |
| c49334.graph_c0 | 2.90482883    | 2.38339145    | 2.08058822    | 2.14966838     | 2.09140989     | 2.06890584     | 0.0022198 | -1.237741 | down      | PREDICTED: uncharacterized protein LOC104590989 [Nelumbo nucifera]                                 |
| c49340.graph_c0 | 12.2940564    | 10.3184154    | 10.4512156    | 131.251919     | 91.3740715     | 93.8793636     | 1.421E-08 | 2.249761  | up        | PREDICTED: uncharacterized protein LOC104715674 [Camelina sativa]                                  |
| c49343.graph_c0 | 59.796504     | 54.5843116    | 59.8105951    | 39.3811255     | 25.0556244     | 22.4102321     | 6.317E-35 | -2.011616 | down      | PREDICTED: serine/threonine-protein kinase HT1 [Sesamum indicum]                                   |
| c49344.graph_c0 | 0             | 0             | 0             | 1.19079783     | 0.72469488     | 0.92430116     | 1.049E-10 | Inf       | up        | lipoyltransferase and lipoate-protein ligase [Lichtheimia corymbifera JMRC:FSU:9682]               |
| c49345.graph_c0 | 0             | 0             | 0             | 3.04106212     | 2.84012697     | 1.56658456     | 3.727E-10 | Inf       | up        | -                                                                                                  |
| c49348.graph_c1 | 0.7656602     | 1.44088255    | 1.29875284    | 11.3142329     | 13.3311266     | 14.4608123     | 1.529E-20 | 2.455953  | up        | PREDICTED: LRR receptor-like serine/threonine-protein kinase GSO2 isoform X2 [Sesamum indicum]     |
| c49350.graph_c0 | 104.359473    | 105.154074    | 104.206274    | 50.3604899     | 56.1543445     | 57.8321032     | 2.297E-41 | -1.952392 | down      | PREDICTED: autophagy-related protein 181 [Sesamum indicum]                                         |
| c49351.graph_c0 | 0             | 0             | 0             | 19.7105002     | 77.1456964     | 1.76116665     | 0.0050344 | Inf       | up        | -                                                                                                  |
| c49353.graph_c5 | 101.752668    | 99.3385947    | 95.9004453    | 54.4154318     | 55.6432319     | 51.0454864     | 2.405E-38 | -1.89907  | down      | PREDICTED: nuclear poly(A) polymerase 4-like isoform X2 [Sesamum indicum]                          |
| c49354.graph_c0 | 6.67941997    | 6.86205862    | 9.7127032     | 4.69610534     | 9.60680806     | 6.19580519     | 0.007187  | -1.213657 | down      | -                                                                                                  |
| c49354.graph_c1 | 22.9590578    | 23.0316851    | 23.2585397    | 14.8927654     | 16.2852366     | 15.1416601     | 7.243E-27 | -1.598893 | down      | fructose-6-phosphate 2-kinase/fructose-2,6-bisphosphatase [Solanum tuberosum]                      |
| c49354.graph_c2 | 1.45919827    | 1.13606845    | 1.66678005    | 7.169646       | 7.75360746     | 9.30344902     | 0.0036088 | 1.484192  | up        | PREDICTED: 6-phosphofructo-2-kinase/fructose-2,6-bisphosphatase [Sesamum indicum]                  |
| c49355.graph_c0 | 352.786116    | 364.423489    | 360.325599    | 297.165634     | 292.807109     | 269.873326     | 2.757E-18 | -1.342186 | down      | PREDICTED: protein-tyrosine-phosphatase MKP1-like isoform X1 [Sesamum indicum]                     |
| c49355.graph_c1 | 0             | 0             | 0             | 547.275685     | 929.492889     | 1206.21381     | 6.102E-35 | Inf       | up        | PREDICTED: (RS)-norcochlorine 6-O-methyltransferase-like [Sesamum indicum]                         |
| c49355.graph_c3 | 2.63241936    | 2.24260028    | 2.66302627    | 1079.86539     | 1906.04278     | 2365.73568     | 1.922E-24 | 8.442398  | up        | PREDICTED: (RS)-norcochlorine 6-O-methyltransferase-like [Sesamum indicum]                         |
| c49357.graph_c0 | 0             | 0             | 0             | 4.04734144     | 12.0397703     | 2.73698806     | 0.0001037 | Inf       | up        | PREDICTED: omega-6 fatty acid desaturase, endoplasmic reticulum isozyme 2-like [Solanum tuberosum] |



| #ID             | 0 h-1<br>FPKM | 0 h-2<br>FPKM | 0 h-3<br>FPKM | 48 h-1<br>FPKM | 48 h-2<br>FPKM | 48 h-3<br>FPKM | FDR       | log2FC    | regulated | nr_annotation                                                                        |
|-----------------|---------------|---------------|---------------|----------------|----------------|----------------|-----------|-----------|-----------|--------------------------------------------------------------------------------------|
| c49360.graph_c2 | 2.44384408    | 2.96763197    | 3.06321255    | 1.99306791     | 2.28736493     | 2.43024201     | 1.567E-06 | -1.358844 | down      | PREDICTED: rho GTPase-activating protein 2-like [Sesamum indicum]                    |
| c49362.graph_c1 | 4.52959179    | 4.64748067    | 4.87484025    | 30.1496027     | 40.7813288     | 51.2867879     | 9.759E-09 | 2.095411  | up        | -                                                                                    |
| c49364.graph_c1 | 7.75482441    | 8.62128324    | 9.78888017    | 5.02626442     | 6.26240382     | 5.56932887     | 3.925E-14 | -1.657096 | down      | Cautionic amino acid transporter 2 isoform 1 [neobroma coccinea]                     |
| c49366.graph_c0 | 23.5762998    | 22.6509606    | 27.1450093    | 1.31003648     | 1.14646397     | 1.23323723     | 2.37E-100 | -5.330768 | down      | PREDICTED: MLO-like protein 3 [Sesamum indicum]                                      |
| c49366.graph_c1 | 124.967387    | 116.459377    | 122.476653    | 788.627542     | 796.375153     | 821.830901     | 1.495E-32 | 1.707614  | up        | PREDICTED: 40S ribosomal protein S26-like [Musa acuminata subsp. malaccensis]        |
| c49369.graph_c4 | 98.3436651    | 100.658719    | 78.001304     | 41.2802728     | 42.3330544     | 37.5851464     | 4.22E-33  | -2.207033 | down      | hypothetical protein MIMGU_mgv1a000459mg [Erythranthe guttata]                       |
| c49370.graph_c2 | 0             | 0             | 0             | 1.98778673     | 2.04200631     | 1.71512308     | 2.157E-11 | Inf       | up        | hypothetical protein M569_09445 [Genlisea aurea]                                     |
| c49372.graph_c0 | 0             | 0             | 0             | 28.1981755     | 49.4843049     | 25.8972011     | 7.274E-20 | Inf       | up        | small subunit ribosomal protein S6e, cytoplasmic [Guillardia theta CCMP2712]         |
| c49375.graph_c0 | 2.25532291    | 2.05641067    | 2.29558751    | 1.23430727     | 1.19863231     | 1.26302106     | 7.914E-08 | -1.855924 | down      | PREDICTED: protein-L-isoaspartate O-methyltransferase 1 isoform X1 [Sesamum indicum] |
| c49376.graph_c0 | 0.71572306    | 1.09573137    | 1.1361401     | 3.91743806     | 5.99908306     | 5.55643332     | 0.0006406 | 1.364369  | up        | hypothetical protein MIMGU_mgv1a024598mg, partial [Erythranthe guttata]              |
| c49376.graph_c1 | 1.55062723    | 1.02117102    | 1.31093249    | 5.88332487     | 7.28804143     | 6.08792569     | 1.53E-06  | 1.290636  | up        | PREDICTED: uncharacterized protein LOC105163785 [Sesamum indicum]                    |
| c49378.graph_c0 | 53.6530519    | 49.6193589    | 49.9097965    | 10.3056634     | 10.7137066     | 9.77709347     | 1.83E-112 | -3.331394 | down      | PREDICTED: uncharacterized protein LOC105170029 [Sesamum indicum]                    |
| c49378.graph_c2 | 143.158693    | 145.333797    | 137.015717    | 17.0044986     | 14.6094579     | 13.986614      | 6.92E-166 | -4.235572 | down      | PREDICTED: uncharacterized protein LOC105158337 [Sesamum indicum]                    |
| c49380.graph_c0 | 0.29697507    | 0.17836347    | 0.53427462    | 2.35289815     | 3.0722871      | 3.94374802     | 3.42E-05  | 2.180969  | up        | PREDICTED: uncharacterized protein LOC105167081 [Sesamum indicum]                    |
| c49380.graph_c1 | 28.9285242    | 26.5411712    | 33.3337753    | 15.5316173     | 13.9109952     | 14.8564352     | 2.309E-21 | -2.021061 | down      | PREDICTED: sedoheptulose-1,7-bisphosphatase, chloroplastic [Sesamum indicum]         |
| c49380.graph_c2 | 0.38560504    | 0.17155163    | 0.36705018    | 185.121861     | 210.080504     | 234.249386     | 1.11E-268 | 8.389007  | up        | PREDICTED: gamma-camphene synthase-like [Sesamum indicum]                            |
| c49382.graph_c1 | 0             | 0             | 0             | 5.40841409     | 9.24122408     | 5.17459606     | 2.625E-13 | Inf       | up        | -                                                                                    |
| c49384.graph_c0 | 0             | 0             | 0             | 2.13494737     | 2.26171787     | 1.39567102     | 3.488E-12 | Inf       | up        | -                                                                                    |
| c49386.graph_c0 | 21.7069217    | 22.2178101    | 20.6893399    | 14.9035976     | 15.8387566     | 20.2606477     | 1.342E-19 | -1.36116  | down      | hypothetical protein MIMGU_mgv1a000652mg [Erythranthe guttata]                       |
| c49386.graph_c1 | 529.836112    | 515.772176    | 543.915697    | 149.274585     | 186.157265     | 192.417656     | 5.139E-60 | -2.612554 | down      | chloroplast chlorophyll a/b binding protein cab-BO3 [Bambusa oldhamii]               |
| c49388.graph_c1 | 20.0880459    | 19.5703694    | 19.4993711    | 193.514601     | 143.989655     | 151.768313     | 2.24E-11  | 2.036321  | up        | PREDICTED: zinc finger BED domain-containing protein DAYSLEEPER [Sesamum indicum]    |
| c49389.graph_c0 | 0             | 0             | 0             | 0.66276025     | 2.07123665     | 0.76663611     | 0.0006879 | Inf       | up        | putative Sec61/secY [Ectocarpus siliculosus]                                         |

| #ID             | 0 h-1<br>FPKM | 0 h-2<br>FPKM | 0 h-3<br>FPKM | 48 h-1<br>FPKM | 48 h-2<br>FPKM | 48 h-3<br>FPKM | FDR       | log2FC    | regulated | nr_annotation                                                                                                |
|-----------------|---------------|---------------|---------------|----------------|----------------|----------------|-----------|-----------|-----------|--------------------------------------------------------------------------------------------------------------|
| c49392.graph_c1 | 5.53459272    | 4.68780635    | 4.10317544    | 0              | 0.06925115     | 0              | 4.71E-32  | -8.742721 | down      | -                                                                                                            |
| c49392.graph_c2 | 11.0139353    | 9.73256395    | 9.68386617    | 61.9728873     | 72.441764      | 71.1050111     | 2.77E-33  | 1.736406  | up        | PREDICTED: auxin response factor 6-like isoform X2 [Nicotiana tomentosiformis]                               |
| c49392.graph_c4 | 16.2406554    | 17.255807     | 14.5864789    | 6.57314594     | 6.93910336     | 6.54405117     | 3.374E-44 | -2.278112 | down      | PREDICTED: uncharacterized protein LOC105175883 [Sesamum indicum]                                            |
| c49398.graph_c0 | 18.6131658    | 18.2039785    | 16.6414523    | 13.938628      | 13.9528891     | 13.8915089     | 2.543E-20 | -1.371783 | down      | PREDICTED: SWI/SNF complex subunit SWI3C [Sesamum indicum]                                                   |
| c49405.graph_c0 | 8.42025304    | 9.34609251    | 8.09686693    | 32.0054024     | 53.2766172     | 52.8713431     | 1.766E-05 | 1.391789  | up        | hypothetical protein MIMGU_mgv1a009036mg [Erythranthe guttata]                                               |
| c49405.graph_c1 | 0             | 0             | 0             | 4.80589558     | 5.42219576     | 6.71372347     | 1.536E-33 | Inf       | up        | PREDICTED: subtilisin-like protease SB15.5 [Sesamum indicum]                                                 |
| c49405.graph_c2 | 14.4546168    | 13.4286169    | 12.8562348    | 6.13458389     | 7.1962851      | 7.40228004     | 4.174E-28 | -1.994124 | down      | unnamed protein product [Coffea canephora]                                                                   |
| c49407.graph_c0 | 0             | 0             | 0             | 0.81553696     | 1.0472273      | 0.52775264     | 1.349E-08 | Inf       | up        | -                                                                                                            |
| c49409.graph_c0 | 15.1282886    | 14.5832847    | 16.3160918    | 14.2571522     | 16.2336784     | 14.489165      | 2.824E-12 | -1.053271 | down      | PREDICTED: copper chaperone for superoxide dismutase, chloroplastic/cytosolic [Sesamum indicum]              |
| c49409.graph_c1 | 21.5742805    | 20.9018763    | 18.0283342    | 15.9681373     | 13.6524534     | 15.7796292     | 4.711E-18 | -1.428086 | down      | PREDICTED: bifunctional riboflavin kinase/FMN phosphatase-like [Sesamum indicum]                             |
| c49414.graph_c0 | 34.4797943    | 33.5515373    | 35.6560621    | 31.9798455     | 30.9773123     | 30.3787871     | 1.781E-16 | -1.168851 | down      | PREDICTED: E3 ubiquitin-protein ligase RGLG2-like isoform X1 [Sesamum indicum]                               |
| c49415.graph_c0 | 237.305843    | 232.929864    | 236.419897    | 44.8121685     | 41.2647574     | 40.4980866     | 1.59E-112 | -3.496688 | down      | -                                                                                                            |
| c49416.graph_c0 | 0             | 0             | 0             | 8.23711327     | 20.3439748     | 5.37773608     | 6.166E-06 | Inf       | up        | --                                                                                                           |
| c49417.graph_c0 | 15.59661      | 15.3923371    | 12.4205563    | 13.3567402     | 12.8634969     | 17.016797      | 0.0001859 | -1.022384 | down      | -                                                                                                            |
| c49417.graph_c1 | 20.8426626    | 19.5735837    | 20.0397356    | 20.1479367     | 15.8943006     | 13.992952      | 3.61E-19  | -1.284343 | down      | PREDICTED: exocyst complex component EXO70A1 [Sesamum indicum]                                               |
| c49417.graph_c6 | 143.411344    | 149.959197    | 132.326661    | 88.2585323     | 91.0934802     | 84.1851192     | 2.694E-31 | -1.708217 | down      | PREDICTED: omega-amidase, chloroplastic isoform X2 [Nicotiana sylvestris]                                    |
| c49418.graph_c0 | 28.9705904    | 30.5409174    | 26.8952884    | 12.5567201     | 13.8589049     | 12.7623434     | 7.47E-36  | -2.1588   | down      | PREDICTED: putative pentatricopeptide repeat-containing protein Atlg13630 [Sesamum indicum]                  |
| c49421.graph_c0 | 4.56497822    | 6.12769078    | 4.058241      | 3.51612033     | 4.14851957     | 4.46595558     | 3.884E-06 | -1.300853 | down      | PREDICTED: pentatricopeptide repeat-containing protein Atlg69290 [Sesamum indicum]                           |
| c49421.graph_c1 | 81.3259596    | 74.4969283    | 72.9869367    | 39.0272994     | 43.5395331     | 49.08835       | 9.545E-37 | -1.81693  | down      | hypothetical protein MIMGU_mgv1a006935mg [Erythranthe guttata]                                               |
| c49428.graph_c1 | 7.59385121    | 6.89103892    | 6.61199963    | 50.0177808     | 57.4207379     | 55.9664194     | 2.661E-34 | 1.934642  | up        | PREDICTED: magnesium-protoporphyrin IX monomethyl ester [oxidative] cyclase, chloroplastic [Sesamum indicum] |
| c49428.graph_c2 | 0.06473118    | 0.58316399    | 0.33272852    | 15.5049921     | 18.3209275     | 22.286248      | 5.502E-31 | 4.81368   | up        | PREDICTED: GATA transcription factor 12-like [Sesamum indicum]                                               |
| c49428.graph_c3 | 113.335929    | 112.473509    | 117.17849     | 575.840278     | 739.467218     | 697.166399     | 4.455E-23 | 1.53068   | up        | PREDICTED: serine carboxypeptidase-like [Sesamum indicum]                                                    |

| #ID             | 0 h-1<br>FPKM | 0 h-2<br>FPKM | 0 h-3<br>FPKM | 48 h-1<br>FPKM | 48 h-2<br>FPKM | 48 h-3<br>FPKM | FDR       | log2FC    | regulated | nr_annotation                                                                             |
|-----------------|---------------|---------------|---------------|----------------|----------------|----------------|-----------|-----------|-----------|-------------------------------------------------------------------------------------------|
| c49429.graph_c1 | 283.76474     | 265.577878    | 262.929304    | 276.800387     | 272.618258     | 249.341941     | 7.186E-13 | -1.04005  | down      | hypothetical protein VITISV_037044 [Vitis vinifera]                                       |
| c49430.graph_c0 | 0.05039946    | 0             | 0             | 6.59324012     | 14.4613599     | 5.74268262     | 1.243E-07 | 8.048808  | up        | hypothetical protein A1O3_04014 [Capronia epimyces CBS 606.96]                            |
| c49431.graph_c0 | 8.63703729    | 8.81520923    | 8.79209743    | 40.8459442     | 37.4533317     | 42.6193811     | 6.074E-14 | 1.187068  | up        | PREDICTED: biotin synthase [Sesamum indicum]                                              |
| c49433.graph_c0 | 0             | 0             | 0             | 1.41861599     | 1.3826235      | 1.06031182     | 2.211E-10 | Inf       | up        | serine/threonine-protein phosphatase pp2a catalytic subunit [Grosmannia clavigera kw1407] |
| c49434.graph_c0 | 216.622941    | 223.61775     | 201.209839    | 138.934876     | 140.087701     | 131.376878     | 1.472E-27 | -1.660477 | down      | PREDICTED: protein misato homolog 1 isoform X1 [Sesamum indicum]                          |
| c49437.graph_c0 | 2.22736594    | 1.6827142     | 1.94417213    | 15.7577713     | 11.5869755     | 13.7627948     | 1.724E-10 | 1.799602  | up        | FIZZY-related 3 isoform 1 [Theobroma cacao]                                               |
| c49437.graph_c1 | 0             | 0             | 0             | 3.45219907     | 5.00235829     | 3.00113112     | 1.32E-16  | Inf       | up        | hypothetical protein MIMGU_mgv1a008893mg [Erythranthe guttata]                            |
| c49439.graph_c0 | 8.04482393    | 8.41677542    | 8.79804339    | 52.6179564     | 42.7660208     | 36.7312828     | 2.795E-06 | 1.374065  | up        | PREDICTED: random slug protein 5 [Sesamum indicum]                                        |
| c49439.graph_c2 | 2.77931852    | 3.55490759    | 1.78576717    | 49.2182983     | 50.1817709     | 41.2626923     | 5.5E-20   | 3.103416  | up        | hypothetical protein EUCR502_H012/1 [Eucaryptus grandis]                                  |
| c49441.graph_c0 | 0             | 0             | 0             | 1.36284461     | 2.00264678     | 3.05118623     | 3.269E-08 | Inf       | up        | unnamed protein product [Chondrus crispus]                                                |
| c49447.graph_c0 | 0.39736854    | 0.53638202    | 0.61121379    | 0.31616157     | 0.48771214     | 0.54783108     | 0.0007192 | -1.222143 | down      | PREDICTED: uncharacterized protein LOC105155261 [Sesamum indicum]                         |
| c49449.graph_c0 | 0.26384192    | 0.10564245    | 0.13561893    | 14.4868761     | 18.1281046     | 14.7070938     | 2.63E-35  | 5.534264  | up        | PREDICTED: protein DA1-related 2 isoform X2 [Sesamum indicum]                             |
| c49451.graph_c1 | 8.09365087    | 7.24893908    | 5.83896804    | 60.1744488     | 57.649942      | 54.9396331     | 1.507E-14 | 2.014754  | up        | hypothetical protein M569_10128, partial [Genlisea aurea]                                 |
| c49452.graph_c0 | 0.57054479    | 0.97905618    | 0.68080317    | 16.8574828     | 18.653936      | 20.8792968     | 1.471E-35 | 3.640403  | up        | Rop guanine nucleotide exchange factor 1 [Morus notabilis]                                |
| c49454.graph_c0 | 0             | 0             | 0             | 2.10941262     | 1.89087199     | 1.51599215     | 2.211E-10 | Inf       | up        | NADH-malate dehydrogenase [Pyropia haitanensis]                                           |
| c49456.graph_c0 | 0.68837441    | 0.76562635    | 0.88458837    | 5.7780426      | 6.79296745     | 10.4079319     | 6.819E-06 | 2.270576  | up        | PREDICTED: uncharacterized protein LOC105161573 [Sesamum indicum]                         |
| c49456.graph_c3 | 1.68681526    | 1.83896513    | 2.38224066    | 11.2780703     | 13.675526      | 11.3494501     | 9.09E-18  | 1.596019  | up        | PREDICTED: pentatricopeptide repeat-containing protein At1g31920 [Sesamum indicum]        |
| c49460.graph_c0 | 0             | 0             | 0             | 1.20937687     | 0.93953798     | 1.00435652     | 1.221E-11 | Inf       | up        | acetyl-CoA C-acyltransferase-like protein [Zea mays]                                      |
| c49463.graph_c0 | 0             | 0             | 0             | 4.59702254     | 6.12675905     | 4.2223515      | 4.054E-18 | Inf       | up        | Molecular chaperones GRP78/BiP/KAR2, HSP70 superfamily [Ectocarpus siliculosus]           |
| c49466.graph_c0 | 2.40642745    | 1.83947562    | 2.02408661    | 10.762323      | 10.8035513     | 12.5890032     | 1.64E-06  | 1.427802  | up        | PREDICTED: growth hormone-regulated TBC protein 1-like [Solanum lycopersicum]             |
| c49470.graph_c0 | 0             | 0             | 0             | 1.77906026     | 1.88469862     | 1.45635735     | 5.771E-11 | Inf       | up        | hypothetical protein CHLNCDRAFT_144079 [Chlorella variabilis]                             |
| c49471.graph_c0 | 14.0316067    | 14.6214675    | 13.4375777    | 8.2141212      | 9.66428369     | 10.7107026     | 7.048E-24 | -1.578632 | down      | PREDICTED: pleiotropic drug resistance protein 1-like [Sesamum indicum]                   |
| c49472.graph_c0 | 0.19057451    | 0.06358845    | 0.2448958     | 7.08131014     | 29.7591647     | 7.02993776     | 0.0072189 | 5.41582   | up        | cathepsin B-like cysteine protease [Guirardina meta                                       |
| c49474.graph_c1 | 10.2082867    | 9.46929023    | 10.7936726    | 5.88023147     | 5.58007447     | 5.59009717     | 8.967E-27 | -1.854958 | down      | PREDICTED: prooxygense 6, chloroplastic [Sesamum indicum]                                 |

| #ID             | 0 h-1<br>FPKM | 0 h-2<br>FPKM | 0 h-3<br>FPKM | 48 h-1<br>FPKM | 48 h-2<br>FPKM | 48 h-3<br>FPKM | FDR       | log2FC    | regulated | nr_annotation                                                                                 |
|-----------------|---------------|---------------|---------------|----------------|----------------|----------------|-----------|-----------|-----------|-----------------------------------------------------------------------------------------------|
| c49477.graph_c0 | 0             | 0             | 0             | 8.856183       | 8.64136371     | 9.0552927      | 1.039E-32 | Inf       | up        | hypothetical protein SELMODRAFT_144212 [Selaginella moellendorffii]                           |
| c49479.graph_c0 | 0.05179035    | 0             | 0             | 33.1125783     | 56.5101664     | 21.6093039     | 1.089E-12 | 10.06755  | up        | hypothetical protein PISMIDRAFT_677145 [Pisolithus microcarpus 441]                           |
| c49480.graph_c0 | 0             | 0             | 0             | 1.81044123     | 2.6954874      | 1.43676624     | 1.137E-09 | Inf       | up        | hypothetical protein JCGZ_17423 [Jatropha curcas]                                             |
| c49485.graph_c0 | 0             | 0             | 0             | 3.03687523     | 4.11271064     | 5.79439392     | 1.267E-15 | Inf       | up        | predicted protein [Physcomitrella patens]                                                     |
| c49487.graph_c0 | 231.275744    | 219.907485    | 219.599078    | 161.974756     | 164.946291     | 154.949668     | 1.486E-23 | -1.494115 | down      | dead box ATP-dependent RNA helicase, putative [Ricinus communis]                              |
| c49488.graph_c0 | 2.3323775     | 0.94971377    | 1.26999891    | 0              | 0              | 0              | 4.822E-10 | -Inf      | down      | fructose-bisphosphate aldolase A [Kozema anomycis CBS551]                                     |
| c49492.graph_c1 | 0             | 0             | 0             | 1.07455261     | 1.82137311     | 1.14735654     | 8.853E-10 | Inf       | up        | TPR1 [Medicago sativa]                                                                        |
| c49494.graph_c0 | 218.726948    | 233.092716    | 219.219013    | 95.0864173     | 106.56672      | 105.624608     | 1.125E-45 | -2.146146 | down      | hypothetical protein MIMGU_mgv1a000743mg [Erythranthe guttata]                                |
| c49495.graph_c0 | 85.7893061    | 86.2121234    | 78.7172924    | 42.3769339     | 37.3015235     | 34.6411523     | 7.792E-52 | -2.146343 | down      | PREDICTED: E3 ubiquitin-protein ligase RHF2A [Sesamum indicum]                                |
| c49495.graph_c1 | 10.9415026    | 10.8015391    | 11.2648178    | 5.49639203     | 7.3572791      | 5.61454438     | 7.944E-28 | -1.859223 | down      | PREDICTED: B11-like protein [Sesamum indicum]                                                 |
| c49495.graph_c2 | 3.32389025    | 2.580292      | 3.05095041    | 22.4976821     | 31.6787817     | 32.2517091     | 3.972E-18 | 2.246982  | up        | PREDICTED: transcription factor ORLH143 [Sesamum indicum]                                     |
| c49495.graph_c3 | 1.54483092    | 1.34467638    | 1.81254551    | 9.96239305     | 13.4382561     | 16.848013      | 3.224E-08 | 2.070787  | up        | -                                                                                             |
| c49495.graph_c4 | 20.628298     | 15.5388594    | 12.9863304    | 9.5020668      | 11.0830843     | 7.51545058     | 3.45E-08  | -1.820527 | down      | -                                                                                             |
| c49496.graph_c0 | 0             | 0             | 0             | 1.80526013     | 2.98820969     | 1.15453503     | 6.525E-06 | Inf       | up        | eukaryotic translation initiation factor 2 gamma [Volvox carteri f. nagariensis]              |
| c49499.graph_c0 | 0             | 0             | 0             | 0.55945944     | 0.64009379     | 0.6969251      | 1.612E-11 | Inf       | up        | PREDICTED: uncharacterized protein LOC102585254 [Solanum tuberosum]                           |
| c49500.graph_c1 | 117.000092    | 116.371935    | 103.367516    | 58.9203857     | 25.7594285     | 17.1319077     | 4.895E-46 | -2.721054 | down      | PREDICTED: pecunesterase-like isoform A1 [Sesamum indicum]                                    |
| c49500.graph_c5 | 3.9267669     | 3.73047569    | 3.36854338    | 14.528567      | 16.3159633     | 14.7396883     | 1.841E-11 | 1.030215  | up        | PREDICTED: brefeldin A-inhibited guanine nucleotide-exchange protein 5-like [Sesamum indicum] |
| c49500.graph_c6 | 40.8543465    | 39.5447419    | 40.5800724    | 194.946914     | 203.230764     | 216.560391     | 1.387E-21 | 1.326458  | up        | ADP/ATP carrier 2 [Theobroma cacao]                                                           |
| c49500.graph_c8 | 0.03320279    | 0.03323603    | 0.04266689    | 3.64004001     | 6.25414231     | 5.71568066     | 8.542E-20 | 6.131362  | up        | PREDICTED: tyrosine/DOPA decarboxylase 1-like [Sesamum indicum]                               |
| c49500.graph_c9 | 64.8536178    | 62.4836653    | 70.6064096    | 4.05346281     | 4.36397596     | 2.87366821     | 7.19E-191 | -5.148866 | down      | hypothetical protein MIMGU_mgv1a019874mg [Erythranthe guttata]                                |
| c49506.graph_c0 | 59.4601009    | 59.1284323    | 59.440856     | 38.6535777     | 40.2131718     | 34.6912049     | 3.989E-32 | -1.665786 | down      | PREDICTED: cullin-4 [Sesamum indicum]                                                         |
| c49508.graph_c0 | 3.61428907    | 3.54093146    | 3.09633636    | 1.51136174     | 1.40096644     | 1.38682561     | 1.862E-13 | -2.267987 | down      | PREDICTED: uncharacterized protein LOC103341621 [Prunus mume]                                 |
| c49510.graph_c0 | 48.9470891    | 48.6587011    | 50.5954309    | 8.89611876     | 10.0556134     | 9.70048222     | 4.17E-108 | -3.390709 | down      | PREDICTED: nuclear valosin-containing protein-like [Sesamum indicum]                          |
| c49511.graph_c0 | 16.1213842    | 16.5432193    | 15.4506612    | 94.6093494     | 120.026443     | 128.812096     | 6.673E-23 | 1.813758  | up        | PREDICTED: L-ascorbate oxidase homolog [Sesamum indicum]                                      |

| #ID             | 0 h-1<br>FPKM | 0 h-2<br>FPKM | 0 h-3<br>FPKM | 48 h-1<br>FPKM | 48 h-2<br>FPKM | 48 h-3<br>FPKM | FDR       | log2FC    | regulated | nr_annotation                                                                                    |
|-----------------|---------------|---------------|---------------|----------------|----------------|----------------|-----------|-----------|-----------|--------------------------------------------------------------------------------------------------|
| c49511.graph_c1 | 0.56510112    | 0.50910029    | 0.36308866    | 28.2690152     | 30.8300275     | 34.8351878     | 5.578E-58 | 5.014394  | up        | hypothetical protein MIMGU_mgv1a004264mg [Erythranthe guttata]                                   |
| c49513.graph_c1 | 0             | 0             | 0             | 6.89454531     | 9.79519931     | 11.3421078     | 5.657E-33 | Inf       | up        | -                                                                                                |
| c49514.graph_c0 | 39.179932     | 37.6256715    | 38.8145107    | 10.0383595     | 11.1835575     | 9.8320288      | 1.229E-88 | -2.915144 | down      | ankyrin repeat BTB/POZ domain-containing protein [Populus trichocarpa]                           |
| c49516.graph_c0 | 0             | 0             | 0             | 3.90927697     | 6.17513057     | 1.21124638     | 2.508E-05 | Inf       | up        | ATP-grasp fold, succinyl-CoA synthetase-type domain-containing protein [Rozella allomycis CSF55] |
| c49519.graph_c0 | 1.73371723    | 2.23782134    | 1.87612234    | 11.6848769     | 12.1115438     | 13.3517142     | 3.804E-08 | 1.648703  | up        | PREDICTED: synaptotagmin-5 [Sesamum indicum]                                                     |
| c49521.graph_c0 | 81.4697907    | 83.8754225    | 77.4490231    | 68.989149      | 74.7015085     | 75.3949595     | 1.105E-15 | -1.166587 | down      | PREDICTED: rubisco accumulation factor 1, chloroplastic [Sesamum indicum]                        |
| c49522.graph_c0 | 0             | 0             | 0             | 1.40677101     | 2.12081625     | 1.25173639     | 1.625E-10 | Inf       | up        | predicted protein [Hordeum vulgare subsp. vulgare]                                               |
| c49523.graph_c2 | 75.5408435    | 80.3946368    | 71.7848138    | 29.2063065     | 29.6000765     | 29.6605587     | 4.08E-61  | -2.380952 | down      | PREDICTED: pentatricopeptide repeat-containing protein At2g34400 [Sesamum indicum]               |
| c49527.graph_c0 | 2.00300178    | 2.38331079    | 2.47680691    | 14.8668178     | 16.0077808     | 16.0785533     | 1.206E-12 | 1.753804  | up        | PREDICTED: fe-S cluster assembly factor HCF101, chloroplastic [Sesamum indicum]                  |
| c49528.graph_c0 | 156.84621     | 160.007235    | 149.925649    | 91.6858876     | 95.038048      | 92.1746022     | 1.561E-35 | -1.760309 | down      | hypothetical protein MIMGU_mgv1a021345mg [Erythranthe guttata]                                   |
| c49528.graph_c1 | 0.14508285    | 0.04840938    | 0             | 9.08886532     | 8.21258739     | 11.2586756     | 1.895E-26 | 6.206368  | up        | PREDICTED: WAT1-related protein At1g21890-like [Sesamum indicum]                                 |
| c49528.graph_c2 | 1107.05383    | 1085.44464    | 1217.30885    | 251.000693     | 262.043186     | 281.047796     | 9.575E-61 | -3.122228 | down      | PREDICTED: LOW QUALITY PROTEIN: pre-mRNA-splicing factor 38B-like [Sesamum indicum]              |
| c49533.graph_c0 | 0             | 0             | 0             | 7.69726373     | 11.8522058     | 10.8309435     | 1.664E-19 | Inf       | up        | Rotamase cyclophilin 2 [Theobroma cacao]                                                         |
| c49537.graph_c0 | 24.4895838    | 17.9551482    | 19.4714571    | 81.7190579     | 93.1262413     | 89.6996646     | 3.309E-11 | 1.07693   | up        | -                                                                                                |
| c49537.graph_c1 | 59.0317979    | 53.5093324    | 54.5397344    | 218.299947     | 237.918649     | 270.397529     | 2.85E-15  | 1.101115  | up        | PREDICTED: putative disease resistance RPP13-like protein 1 [Sesamum indicum]                    |
| c49537.graph_c2 | 13.7156755    | 13.4548214    | 14.2008641    | 10.3252332     | 13.9215141     | 11.6608424     | 1.877E-11 | -1.226586 | down      | hypothetical protein M569_00556, partial [Genlisea aurea]                                        |
| c49537.graph_c3 | 0.61164438    | 0.97961095    | 1.25757958    | 5.63486693     | 7.99907406     | 7.52080607     | 0.0002588 | 1.863212  | up        | -                                                                                                |
| c49537.graph_c4 | 94.5968071    | 92.4953245    | 92.3043667    | 61.4581764     | 63.0903329     | 56.4054293     | 6.276E-31 | -1.643589 | down      | PREDICTED: uncharacterized protein LOC105163060 [Sesamum indicum]                                |
| c49540.graph_c0 | 0             | 0             | 0             | 4.01180728     | 8.97227154     | 3.2722085      | 2.062E-06 | Inf       | up        | --                                                                                               |
| c49541.graph_c1 | 0.23905379    | 0.65805621    | 0.49918958    | 10.2407854     | 10.4697432     | 9.7490627      | 1.678E-25 | 3.427303  | up        | PREDICTED: CBL-interacting serine/threonine-protein kinase 1-like [Sesamum indicum]              |
| c49542.graph_c0 | 8.50682335    | 8.14656701    | 7.78984437    | 7.34336869     | 7.48522937     | 7.74206746     | 4.801E-08 | -1.13224  | down      | PREDICTED: putative Peroxidase 48 [Nicotiana sylvestris]                                         |
| c49544.graph_c0 | 0             | 0             | 0             | 4.26051303     | 3.8155335      | 5.7450917      | 1.111E-18 | Inf       | up        | phenylpropenal double-bond reductase [Pinus pinaster]                                            |
| c49545.graph_c0 | 0             | 0             | 0             | 2.09392304     | 2.64078281     | 0.93158006     | 5.632E-06 | Inf       | up        | Lysine--tRNA ligase [Rozella allomycis CSF55]                                                    |

| #ID             | 0 h-1<br>FPKM | 0 h-2<br>FPKM | 0 h-3<br>FPKM | 48 h-1<br>FPKM | 48 h-2<br>FPKM | 48 h-3<br>FPKM | FDR       | log2FC    | regulated | nr_annotation                                                                                             |
|-----------------|---------------|---------------|---------------|----------------|----------------|----------------|-----------|-----------|-----------|-----------------------------------------------------------------------------------------------------------|
| c49548.graph_c1 | 6.92287001    | 7.01902714    | 7.48346679    | 3.91427174     | 4.87164318     | 5.67492756     | 1.113E-12 | -1.590544 | down      | PREDICTED: 4-hydroxy-3-methylbut-2-enyl diphosphate reductase, chloroplastic-like [Sesamum indicum]       |
| c49548.graph_c2 | 5.73956642    | 5.68147691    | 6.84289003    | 33.3416525     | 30.871248      | 32.2549138     | 5.716E-17 | 1.382776  | up        | hypothetical protein MIMGU_mgv1a010472mg [Erythranthe guttata]                                            |
| c49549.graph_c0 | 18.8673114    | 20.0549468    | 16.7216065    | 6.11091011     | 7.46465117     | 6.06164825     | 2.21E-63  | -2.520884 | down      | PREDICTED: uncharacterized protein LOC105168432 [Sesamum indicum]                                         |
| c49552.graph_c0 | 0             | 0             | 0             | 22.1524154     | 50.1434245     | 19.0020541     | 5.051E-10 | Inf       | up        | predicted protein [Physcomitrella patens]                                                                 |
| c49554.graph_c0 | 0.70548194    | 0.82388644    | 0.65474661    | 7.18540332     | 9.90715808     | 12.2408765     | 6.388E-11 | 2.724134  | up        | PREDICTED: uncharacterized protein At4g17910 isoform X1 [Sesamum indicum]                                 |
| c49555.graph_c0 | 0             | 0             | 0             | 1.38612804     | 1.64464674     | 0.56734946     | 4.278E-06 | Inf       | up        | acid protease, partial [Dacryopinax sp. DJM-731 SS1]                                                      |
| c49557.graph_c0 | 0             | 0             | 0             | 1.01739012     | 2.01742326     | 1.25344746     | 1.088E-09 | Inf       | up        | heat shock protein SSA1 [Spathaspora passalidarum NRRL Y-27907]                                           |
| c49561.graph_c1 | 0.37164562    | 0.31690402    | 0.35376247    | 3.2336284      | 4.1241985      | 4.33281973     | 1.901E-14 | 2.465175  | up        | PREDICTED: probable inactive leucine-rich repeat receptor-like protein kinase At3g03770 [Sesamum indicum] |
| c49562.graph_c0 | 0             | 0             | 0             | 0.76609109     | 1.37344412     | 0.78653451     | 2.253E-08 | Inf       | up        | predicted protein, partial [Ostreococcus lucimarinus CCE00011]                                            |
| c49563.graph_c0 | 2.39110668    | 1.43610061    | 0.73744002    | 11.9834683     | 14.001873      | 15.994227      | 2.763E-07 | 2.189265  | up        | -                                                                                                         |
| c49564.graph_c2 | 90.9966295    | 95.7442115    | 86.5154596    | 625.626346     | 520.133762     | 533.554845     | 3.476E-16 | 1.606339  | up        | PREDICTED: uncharacterized protein LOC105178313 [Sesamum indicum]                                         |
| c49567.graph_c0 | 2.64733068    | 0.75082811    | 1.13397491    | 28.1692222     | 31.5212881     | 23.2202085     | 4.159E-24 | 3.181951  | up        | predicted protein [Hordeum vulgare subsp. vulgare]                                                        |
| c49570.graph_c2 | 4.23444696    | 5.16589993    | 2.89076075    | 1.58480105     | 1.29146503     | 1.19320084     | 1.19E-07  | -2.602892 | down      | -                                                                                                         |
| c49570.graph_c3 | 14.2008194    | 12.9441583    | 12.5383697    | 3.4223012      | 4.31390172     | 3.87388449     | 2.871E-57 | -2.793156 | down      | PREDICTED: DNA polymerase kappa isoform X1 [Sesamum indicum]                                              |
| c49571.graph_c2 | 25.2670932    | 33.5799508    | 20.450877     | 310.519923     | 198.715655     | 156.046461     | 0.0011404 | 2.065646  | up        | PREDICTED: cannabidiolic acid synthase-like [Sesamum indicum]                                             |
| c49571.graph_c4 | 68.4677408    | 70.6447687    | 66.3012319    | 27.6574445     | 23.3488816     | 23.4098545     | 3.088E-66 | -2.478441 | down      | PREDICTED: scarecrow-like protein Z1 [Sesamum indicum]                                                    |
| c49573.graph_c0 | 0.83758354    | 0.52401391    | 0.134541      | 5.30500156     | 7.86800824     | 7.03762538     | 1.566E-06 | 2.744975  | up        | -                                                                                                         |
| c49575.graph_c0 | 0             | 0             | 0             | 1.03409105     | 2.10671937     | 0.93782276     | 2.409E-07 | Inf       | up        | --                                                                                                        |
| c49576.graph_c0 | 1.35331597    | 1.5882351     | 1.25932265    | 20.8295396     | 21.1099343     | 22.7419245     | 1.544E-49 | 2.927722  | up        | PREDICTED: DNA (cytosine-5)-methyltransferase 1B-like [Sesamum indicum]                                   |
| c49579.graph_c0 | 0             | 0             | 0             | 4.99390561     | 7.3735472      | 3.52706557     | 1.433E-13 | Inf       | up        | hypothetical protein GUITHDRAFT_78647, partial [Guillardia theta CCMP2712]                                |
| c49581.graph_c0 | 18.318413     | 16.9262364    | 15.4367329    | 72.729573      | 75.088438      | 77.6225511     | 5.055E-15 | 1.13648   | up        | PREDICTED: magnesium-chelatase subunit ChlD, chloroplastic [Sesamum indicum]                              |
| c49585.graph_c0 | 0             | 0             | 0             | 25.8999954     | 40.0024245     | 21.6475869     | 8.253E-23 | Inf       | up        | 60S ribosomal protein L5 [Rozella allomyces CSF55]                                                        |
| c49587.graph_c1 | 15.9137105    | 15.8693061    | 15.9570004    | 80.1065497     | 85.333821      | 86.0528285     | 1.656E-22 | 1.378517  | up        | hypothetical protein MIMGU_mgv1a009436mg [Erythranthe guttata]                                            |

| #ID             | 0 h-1<br>FPKM | 0 h-2<br>FPKM | 0 h-3<br>FPKM | 48 h-1<br>FPKM | 48 h-2<br>FPKM | 48 h-3<br>FPKM | FDR       | log2FC    | regulated | nr_annotation                                                                              |
|-----------------|---------------|---------------|---------------|----------------|----------------|----------------|-----------|-----------|-----------|--------------------------------------------------------------------------------------------|
| c49588.graph_c0 | 7.74047362    | 7.06770293    | 5.89071105    | 6.51366278     | 6.74877796     | 6.16203724     | 1.577E-13 | -1.106538 | down      | PREDICTED: uncharacterized protein LOC105173993 [Sesamum indicum]                          |
| c49592.graph_c3 | 45.4048134    | 48.163729     | 45.9809059    | 38.4168908     | 34.2604281     | 31.6647521     | 6.155E-23 | -1.433879 | down      | PREDICTED: DNA annealing helicase and endonuclease ZRANB3 isoform X1 [Sesamum indicum]     |
| c49593.graph_c0 | 1.15023478    | 1.08365794    | 0.95641585    | 9.66170893     | 10.4335138     | 8.20868203     | 4.414E-07 | 2.133813  | up        | -                                                                                          |
| c49594.graph_c0 | 1.11344498    | 0.86288511    | 1.06157679    | 11.8791727     | 12.2339987     | 11.30609       | 5.886E-17 | 2.525597  | up        | hypothetical protein MIMGU_mgv1a0042561mg, partial [Erythranthe guttata]                   |
| c49595.graph_c0 | 15.9516749    | 15.9833334    | 15.1423354    | 4.28745564     | 4.7714353      | 5.43341684     | 6.261E-69 | -2.719598 | down      | PREDICTED: uncharacterized protein LOC105169231 [Sesamum indicum]                          |
| c49599.graph_c0 | 13.7381142    | 5.44885449    | 8.32736824    | 0              | 0              | 0              | 2.689E-13 | -Inf      | down      | --                                                                                         |
| c49600.graph_c2 | 96.4460323    | 99.0295844    | 86.5096975    | 69.6037853     | 71.3996305     | 67.7729904     | 1.036E-24 | -1.449908 | down      | PREDICTED: transcription initiation factor TFIID subunit 15b [Sesamum indicum]             |
| c49602.graph_c0 | 0             | 0             | 0             | 4.9131308      | 7.44585045     | 4.12880345     | 4.771E-13 | Inf       | up        | sporamin A [Ipomoea trifida]                                                               |
| c49603.graph_c0 | 730.120419    | 773.602999    | 730.564182    | 74.71413       | 80.0093738     | 78.742867      | 6.28E-102 | -4.276916 | down      | PREDICTED: GRIP and coiled-coil domain-containing protein 2-like [Sesamum indicum]         |
| c49606.graph_c0 | 0             | 0             | 0             | 0.55972302     | 1.18591734     | 0.4382736      | 8.376E-05 | Inf       | up        | -                                                                                          |
| c49607.graph_c1 | 25.1913399    | 27.4172837    | 22.9153595    | 22.6171588     | 24.7051664     | 22.2271832     | 8.185E-15 | -1.135894 | down      | PREDICTED: uncharacterized protein LOC105164316 isoform X1 [Sesamum indicum]               |
| c49610.graph_c2 | 112.899898    | 116.166523    | 105.436952    | 89.2068332     | 83.9453848     | 73.0737244     | 5.391E-23 | -1.456336 | down      | PREDICTED: alpha,alpha-trehalose-phosphate synthase [UDP-forming] 1-like [Sesamum indicum] |
| c49611.graph_c0 | 38.1760675    | 36.995986     | 33.0701077    | 29.0780877     | 28.6797903     | 26.438867      | 6.557E-23 | -1.377524 | down      | PREDICTED: nipped-B-like protein isoform X2 [Sesamum indicum]                              |
| c49614.graph_c1 | 0             | 0             | 0             | 3.11313331     | 4.904699       | 1.91772505     | 1.753E-06 | Inf       | up        | -                                                                                          |
| c49615.graph_c0 | 0             | 0             | 0             | 0.7034477      | 1.4663958      | 0.66630569     | 3.138E-06 | Inf       | up        | predicted protein [Physcomitrella patens]                                                  |
| c49616.graph_c0 | 23.0603137    | 19.6015507    | 20.0315271    | 1413.06694     | 1836.19981     | 1982.21427     | 1.431E-76 | 5.360923  | up        | hypothetical protein MIMGU_mgv1a012029mg [Erythranthe guttata]                             |
| c49618.graph_c2 | 0             | 0             | 0             | 1.12170462     | 1.22544472     | 0.99808602     | 2.155E-11 | Inf       | up        | hypothetical protein NDAI_0G05590 [Naumovozyma dairenensis CBS 421]                        |
| c49618.graph_c3 | 1.60934337    | 1.93314586    | 2.06806995    | 0.29652642     | 0.12565351     | 0.21107794     | 8.262E-13 | -4.154189 | down      | -                                                                                          |
| c49623.graph_c1 | 0             | 0             | 0             | 1.95358867     | 2.88780043     | 1.65744068     | 1.185E-11 | Inf       | up        | predicted protein [Physcomitrella patens]                                                  |
| c49624.graph_c0 | 0             | 0             | 0             | 20.0166367     | 17.2907922     | 13.4342193     | 1.378E-38 | Inf       | up        | -                                                                                          |
| c49627.graph_c0 | 0             | 0             | 0             | 0.70215243     | 1.6426585      | 0.80699589     | 9.47E-06  | Inf       | up        | predicted protein [Physcomitrella patens]                                                  |
| c49632.graph_c0 | 0             | 0             | 0             | 1.83596897     | 2.95637949     | 2.09105171     | 2.148E-11 | Inf       | up        | hypothetical protein THAOC_09683, partial [Thalassiosira oceanica]                         |
| c49634.graph_c0 | 5.48318464    | 5.36449705    | 4.78242716    | 24.2059        | 25.7400742     | 26.2770892     | 2.845E-14 | 1.268532  | up        | PREDICTED: uncharacterized protein At1g04910 [Sesamum indicum]                             |

| #ID             | 0 h-1<br>FPKM | 0 h-2<br>FPKM | 0 h-3<br>FPKM | 48 h-1<br>FPKM | 48 h-2<br>FPKM | 48 h-3<br>FPKM | FDR       | log2FC    | regulated | nr_annotation                                                                                 |
|-----------------|---------------|---------------|---------------|----------------|----------------|----------------|-----------|-----------|-----------|-----------------------------------------------------------------------------------------------|
| c49635.graph_c0 | 7.04059481    | 7.0476449     | 7.26979297    | 2.73906376     | 2.77072615     | 2.8687904      | 1.378E-47 | -2.368255 | down      | PREDICTED: uncharacterized protein LOC105155337 [Sesamum indicum]                             |
| c49636.graph_c0 | 19.5286373    | 16.1401193    | 16.4273663    | 1.1244409      | 0.81503759     | 1.73774657     | 1.515E-67 | -4.84165  | down      | -                                                                                             |
| c49640.graph_c0 | 0             | 0             | 0             | 1.66195916     | 4.08602336     | 1.78572229     | 1.625E-06 | Inf       | up        | Sterol methyltransferase [Ectocarpus siliculosus]                                             |
| c49641.graph_c0 | 26.1821501    | 28.1659934    | 21.1416593    | 9.8373563      | 9.85541657     | 9.76813079     | 3.497E-31 | -2.372362 | down      | PREDICTED: LOW QUALITY PROTEIN: auxin transport protein BIG [Sesamum indicum]                 |
| c49642.graph_c0 | 0             | 0             | 0             | 2.27032064     | 4.25092643     | 1.50334337     | 3.828E-07 | Inf       | up        | -                                                                                             |
| c49643.graph_c2 | 9.02041435    | 7.85418558    | 9.53086253    | 127.581265     | 134.653815     | 135.258115     | 4.692E-88 | 2.892389  | up        | PREDICTED: phosphoglucomutase, cytoplasmic [Sesamum indicum]                                  |
| c49643.graph_c4 | 41.7463142    | 43.3194826    | 35.6860304    | 38.9132966     | 40.8190189     | 40.6188004     | 1.407E-13 | -1.021294 | down      | PREDICTED: protein NYNRIN-like [Prunus mume]                                                  |
| c49647.graph_c0 | 5.62087615    | 3.34073711    | 3.72438433    | 0.40455607     | 0.25714686     | 0.43196587     | 1.931E-14 | -4.546472 | down      | PREDICTED: uncharacterized protein LOC105167219 [Sesamum indicum]                             |
| c49648.graph_c1 | 157.417783    | 145.413425    | 153.844003    | 800.296952     | 742.796214     | 672.105684     | 4.035E-16 | 1.262985  | up        | PREDICTED: uncharacterized protein LOC105179524 [Sesamum indicum]                             |
| c49651.graph_c0 | 0             | 0             | 0             | 6.74004038     | 13.5628974     | 3.3451983      | 1.828E-06 | Inf       | up        | Os02g0639600 [Oryza sativa Japonica Group]                                                    |
| c49652.graph_c0 | 0             | 0             | 0             | 1.39312546     | 3.26059332     | 0.60538344     | 0.0011684 | Inf       | up        | -                                                                                             |
| c49656.graph_c0 | 0             | 0             | 0             | 4.64275663     | 7.97879891     | 5.14092062     | 1.747E-12 | Inf       | up        | PREDICTED: obg-like ATPase 1 [Pyrus x bretschneideri]                                         |
| c49658.graph_c1 | 0             | 0             | 0             | 10.2502512     | 26.5030736     | 6.44111007     | 1.42E-05  | Inf       | up        | -                                                                                             |
| c49659.graph_c0 | 48.105363     | 49.030048     | 48.4551956    | 12.1004227     | 10.6824421     | 10.4079872     | 1.888E-84 | -3.147801 | down      | hypothetical protein MIMGU_mgv1a000745mg [Erythranthe guttata]                                |
| c49661.graph_c0 | 0             | 0             | 0             | 2.16141167     | 2.21079656     | 1.39267011     | 1.387E-15 | Inf       | up        | transferrin-like protein IDI-100 [Dunaliella salina]                                          |
| c49662.graph_c0 | 0             | 0             | 0             | 3.98140655     | 3.25414394     | 2.96783376     | 2.94E-35  | Inf       | up        | predicted protein [Hordeum vulgare subsp. vulgare]                                            |
| c49663.graph_c0 | 0.15239218    | 0.15254478    | 0.32638331    | 4.21180854     | 6.14750727     | 5.99622705     | 5.387E-12 | 3.662152  | up        | PREDICTED: uncharacterized protein LOC105174845 isoform X2 [Sesamum indicum]                  |
| c49665.graph_c1 | 0             | 0             | 0             | 1.38069452     | 3.86565014     | 1.05302887     | 0.0010538 | Inf       | up        | --                                                                                            |
| c49667.graph_c0 | 0             | 0             | 0             | 2.60759897     | 3.68324657     | 2.36856393     | 4.803E-13 | Inf       | up        | PREDICTED: eukaryotic translation initiation factor 3 subunit D-like [Pyrus x bretschneideri] |
| c49668.graph_c0 | 4.20392411    | 4.96343975    | 5.84084981    | 3.21088993     | 2.6300633      | 4.43281544     | 1.867E-07 | -1.56798  | down      | NADH-ubiquinone oxidoreductase chain 1 [Medicago truncatula]                                  |
| c49671.graph_c1 | 0.14142313    | 0.18875299    | 0.24231243    | 1.95432317     | 3.45061404     | 3.51653323     | 1.958E-07 | 2.929771  | up        | PREDICTED: systemin receptor SR100-like [Sesamum indicum]                                     |
| c49671.graph_c2 | 37.6918059    | 37.214366     | 33.5741401    | 15.1726407     | 15.0689747     | 16.3296784     | 4.814E-52 | -2.236641 | down      | PREDICTED: uncharacterized protein LOC104231501 [Nicotiana sylvestris]                        |
| c49671.graph_c3 | 35.6883239    | 40.5239555    | 29.5534999    | 324.113329     | 253.606774     | 231.423803     | 5.634E-09 | 1.926246  | up        | PREDICTED: receptor-like protein kinase BRI1-like 3 [Sesamum indicum]                         |
| c49671.graph_c5 | 4.50009095    | 5.35161536    | 3.3609407     | 0.53150991     | 0.1876901      | 0.31528955     | 3.126E-25 | -4.672378 | down      | -                                                                                             |
| c49672.graph_c0 | 0             | 0             | 0             | 7.04748293     | 7.90512735     | 3.9785378      | 7.68E-16  | Inf       | up        | nitric oxide dioxygenase [Cladophialophora psammophila CBS 110553]                            |



| #ID             | 0 h-1<br>FPKM | 0 h-2<br>FPKM | 0 h-3<br>FPKM | 48 h-1<br>FPKM | 48 h-2<br>FPKM | 48 h-3<br>FPKM | FDR       | log2FC    | regulated | nr_annotation                                                                                               |
|-----------------|---------------|---------------|---------------|----------------|----------------|----------------|-----------|-----------|-----------|-------------------------------------------------------------------------------------------------------------|
| c49674.graph_c1 | 0             | 0             | 0             | 4.38430944     | 9.57078204     | 3.13272735     | 8.299E-06 | Inf       | up        | pyrophosphate--fructose-6-phosphate 1-phosphotransferase [Galdieria sulphuraria]                            |
| c49674.graph_c2 | 1.3440458     | 1.02064195    | 1.78670904    | 92.1835421     | 89.5154086     | 84.8357569     | 7.53E-146 | 4.983762  | up        | PREDICTED: NAC domain-containing protein 100-like [Sesamum indicum]                                         |
| c49676.graph_c0 | 0             | 0             | 0             | 3.06322813     | 3.32624674     | 3.20262931     | 4.957E-12 | Inf       | up        | --                                                                                                          |
| c49679.graph_c2 | 56.1167668    | 56.1167863    | 54.5168739    | 14.7340514     | 15.2803315     | 17.2963566     | 1.219E-73 | -2.836215 | down      | hypothetical protein MIMGU_mgv1a010138mg [Erythranthe guttata]                                              |
| c49680.graph_c0 | 70.0135872    | 73.9470045    | 61.7497552    | 32.8014049     | 40.6644178     | 41.0838876     | 7.773E-40 | -1.8646   | down      | OSJNBa0006B20.7 [Oryza sativa Japonica Group]                                                               |
| c49682.graph_c0 | 52.9688171    | 51.8598523    | 52.818245     | 36.9948372     | 38.14252       | 40.4952178     | 3.35E-24  | -1.465665 | down      | hypothetical protein MIMGU_mgv1a027053mg [Erythranthe guttata]                                              |
| c49684.graph_c2 | 4.49946205    | 3.54858052    | 2.45296413    | 0.37683617     | 1.46377819     | 0.44707542     | 8.466E-10 | -3.228046 | down      | -                                                                                                           |
| c49686.graph_c0 | 7.96232432    | 7.16642619    | 7.24576751    | 2.34544306     | 2.0344626      | 1.62474826     | 7.838E-53 | -2.909885 | down      | PREDICTED: DNA repair protein REV1 [Sesamum indicum]                                                        |
| c49687.graph_c2 | 60.988951     | 83.4833389    | 68.2567925    | 0.166727       | 0.50044329     | 0.54395984     | 4.208E-97 | -8.490798 | down      | PREDICTED: uncharacterized protein LOC103716664 [Phoenix dactylifera]                                       |
| c49689.graph_c1 | 36.0723116    | 38.3812911    | 34.6006034    | 14.2085271     | 18.2926183     | 18.5074524     | 2.517E-49 | -2.117724 | down      | PREDICTED: TBC1 domain family member 5 homolog A-like [Sesamum indicum]                                     |
| c49689.graph_c2 | 4.01115458    | 4.32562253    | 3.56031953    | 18.1338198     | 23.4885703     | 23.3556002     | 1.702E-17 | 1.428722  | up        | hypothetical protein MIMGU_mgv1a021246mg [Erythranthe guttata]                                              |
| c49693.graph_c0 | 3.33164391    | 3.50325886    | 3.41717988    | 17.7542303     | 19.7481311     | 17.8772289     | 1.296E-18 | 1.414635  | up        | PREDICTED: beta-galactosidase 8-like [Sesamum indicum]                                                      |
| c49697.graph_c0 | 0             | 0             | 0             | 1.12502158     | 1.24148328     | 1.37642647     | 1.128E-11 | Inf       | up        | 26S proteasome regulatory subunit N5 [Mucor circinelloides f. circinelloides 1006PhL]                       |
| c49702.graph_c0 | 335.328193    | 327.490437    | 321.635988    | 141.10231      | 157.420189     | 148.679327     | 2.93E-42  | -2.157119 | down      | hypothetical protein MIMGU_mgv1a004852mg [Erythranthe guttata]                                              |
| c49703.graph_c0 | 2.4340113     | 2.90390676    | 2.50951467    | 0.24770366     | 0.53863514     | 0.31320743     | 6.734E-37 | -3.863013 | down      | PREDICTED: stromal 70 kDa heat shock-related protein, chloroplastic-like [Sesamum indicum]                  |
| c49707.graph_c1 | 18.2925959    | 17.133783     | 15.2233931    | 10.7533931     | 9.69163009     | 11.6033543     | 1.856E-20 | -1.675457 | down      | PREDICTED: non-structural maintenance of chromosomes element 1 homolog [Sesamum indicum]                    |
| c49708.graph_c0 | 0             | 0             | 0             | 1086.00356     | 1275.71479     | 1272.0811      | 0         | Inf       | up        | -                                                                                                           |
| c49708.graph_c1 | 33.9388347    | 30.5462504    | 32.5215737    | 17.5470698     | 18.9887561     | 17.3400913     | 7.388E-37 | -1.866631 | down      | PREDICTED: uncharacterized protein LOC105169648 [Sesamum indicum]                                           |
| c49708.graph_c2 | 5.34735724    | 6.49972149    | 4.95734388    | 1.724217       | 1.97570894     | 3.41280761     | 3.185E-14 | -2.262996 | down      | PREDICTED: LOW QUALITY PROTEIN: multiple C2 and transmembrane domain-containing protein 1 [Sesamum indicum] |
| c49716.graph_c0 | 0.35524791    | 0.35560364    | 0.15216921    | 15.4911374     | 14.0995758     | 17.8123203     | 2.62E-28  | 4.769655  | up        | -                                                                                                           |
| c49716.graph_c1 | 1.92697895    | 2.36729684    | 3.03902703    | 2.09803301     | 1.79518627     | 1.57961452     | 0.0038619 | -1.439724 | down      | NADH dehydrogenase subunit 5 [Arabidopsis thaliana]                                                         |
| c49716.graph_c2 | 5.67202895    | 7.15711158    | 9.29063028    | 92.6228176     | 84.4782558     | 86.8028465     | 4.405E-60 | 2.556205  | up        | NADH dehydrogenase subunit 5 [Beta vulgaris subsp. maritima]                                                |
| c49717.graph_c0 | 0             | 0             | 0             | 9.90859763     | 13.5537641     | 10.6089985     | 2.228E-30 | Inf       | up        | --                                                                                                          |

| #ID             | 0 h-1<br>FPKM | 0 h-2<br>FPKM | 0 h-3<br>FPKM | 48 h-1<br>FPKM | 48 h-2<br>FPKM | 48 h-3<br>FPKM | FDR       | log2FC    | regulated | nr_annotation                                                                                                |
|-----------------|---------------|---------------|---------------|----------------|----------------|----------------|-----------|-----------|-----------|--------------------------------------------------------------------------------------------------------------|
| c49722.graph_c0 | 3.66879225    | 4.42579235    | 4.31159088    | 1.16997602     | 1.13233496     | 1.3366409      | 5.669E-32 | -2.788571 | down      | hypothetical protein VITISV_035665 [Vitis vinifera]                                                          |
| c49723.graph_c0 | 0             | 0             | 0             | 1.07000878     | 2.26708911     | 1.08809986     | 8.788E-07 | Inf       | up        | delta-9 fatty acid desaturase [Cryptococcus curvatus]                                                        |
| c49724.graph_c0 | 0             | 0             | 0             | 3.94158764     | 7.12810277     | 3.57805353     | 3.526E-11 | Inf       | up        | -                                                                                                            |
| c49726.graph_c0 | 0.02036919    | 0.04077918    | 0.05235044    | 0.52543204     | 0.37771426     | 0.63449994     | 4.191E-06 | 2.737134  | up        | unnamed protein product [Coffea canephora]                                                                   |
| c49728.graph_c0 | 1.94088206    | 1.77388421    | 1.9519124     | 8.35727037     | 7.82403615     | 7.40166172     | 0.0017496 | 1.041081  | up        | PREDICTED: origin recognition complex subunit 3 [Sesamum indicum]                                            |
| c49733.graph_c1 | 0             | 0             | 0             | 3.75719643     | 4.91444467     | 2.25149625     | 5.895E-11 | Inf       | up        | -                                                                                                            |
| c49734.graph_c0 | 0             | 0             | 0             | 1.46357626     | 2.87126218     | 1.20581607     | 1.113E-05 | Inf       | up        | PREDICTED: ABC transporter E family member 2 [Nicotiana sylvestris]                                          |
| c49737.graph_c0 | 0             | 0.083685      | 0             | 2.07951175     | 6.44578715     | 3.7006741      | 4.39E-05  | 6.169399  | up        | KLTHOG03806p [Lachancea thermotolerans]                                                                      |
| c49738.graph_c0 | 0             | 0             | 0             | 4.96758694     | 8.18619825     | 2.16913737     | 2.818E-06 | Inf       | up        | F-type H <sup>+</sup> -transporting ATPase subunit gamma [Galdieria sulphuraria]                             |
| c49740.graph_c1 | 0.70167913    | 1.05357264    | 1.40888354    | 9.61568471     | 9.28782976     | 7.04609989     | 1.399E-08 | 2.015138  | up        | PREDICTED: RPM1-interacting protein 4-like [Sesamum indicum]                                                 |
| c49740.graph_c2 | 506.353189    | 494.623171    | 508.834806    | 37.6520508     | 41.7939241     | 49.4533487     | 5.06E-173 | -4.570867 | down      | galactinol synthase [Boea hygrometrica]                                                                      |
| c49740.graph_c3 | 68.3056307    | 77.5616299    | 59.8202329    | 63.6750719     | 60.774754      | 57.9463157     | 1.729E-14 | -1.187628 | down      | hypothetical protein MIMGU_mgv1a010537mg [Erythranthe guttata]                                               |
| c49741.graph_c0 | 0             | 0             | 0             | 2.00469093     | 1.80516792     | 1.69457384     | 1.265E-11 | Inf       | up        | PREDICTED: serine-threonine kinase receptor-associated protein-like [Setaria italica]                        |
| c49743.graph_c0 | 0             | 0             | 0             | 7.834411       | 15.4352475     | 6.1208884      | 2.835E-09 | Inf       | up        | -                                                                                                            |
| c49744.graph_c0 | 0             | 0             | 0             | 4.67417362     | 6.33068023     | 3.05348091     | 4.982E-11 | Inf       | up        | S-Adenosylmethionine decarboxylase [Eriocarpus ciliolobus]                                                   |
| c49747.graph_c0 | 0.75169278    | 0.44589362    | 0.60819388    | 4.05245669     | 5.32560095     | 4.38179434     | 7.58E-07  | 1.909197  | up        | --                                                                                                           |
| c49750.graph_c0 | 9.78968098    | 8.16623655    | 8.38675176    | 5.01049592     | 3.53867525     | 4.01247822     | 2.602E-06 | -2.07883  | down      | -                                                                                                            |
| c49750.graph_c2 | 13.4761998    | 12.4190835    | 13.0109944    | 74.556614      | 88.3782281     | 99.889961      | 3.579E-23 | 1.734602  | up        | hypothetical protein MIMGU_mgv1a015998mg [Erythranthe guttata]                                               |
| c49751.graph_c1 | 34.6220885    | 38.2947594    | 36.2255521    | 17.8865017     | 19.5319719     | 19.0317215     | 1.11E-42  | -1.970156 | down      | PREDICTED: polycomb group protein EMBRYONIC FLOWER 2 isoform X5 [Sesamum indicum]                            |
| c49752.graph_c0 | 6.28200992    | 6.50267428    | 5.04539466    | 2.23603986     | 2.92618089     | 2.45775948     | 1.983E-09 | -2.245293 | down      | PREDICTED: probable protein phosphatase 2C 75 [Populus euphratica]                                           |
| c49755.graph_c0 | 0             | 0             | 0             | 3.49221718     | 3.0698648      | 1.58673388     | 3.727E-07 | Inf       | up        | -                                                                                                            |
| c49756.graph_c0 | 0             | 0             | 0             | 0.44919169     | 0.83842727     | 0.49485189     | 8.283E-08 | Inf       | up        | predicted protein [Physcomitrella patens]                                                                    |
| c49757.graph_c0 | 0             | 0             | 0             | 2.50883285     | 5.77561297     | 1.63132859     | 8.434E-05 | Inf       | up        | S-(hydroxymethyl)glutathione dehydrogenase-like protein [Chaetomium thermophilum var. thermophilum DSM 1495] |
| c49759.graph_c1 | 96.6580848    | 98.2601691    | 96.5452081    | 92.7117229     | 79.388396      | 69.3724468     | 2.034E-18 | -1.284621 | down      | PREDICTED: 6-phosphofructo-2-kinase/fructose-2,6-bisphosphatase [Sesamum indicum]                            |

| #ID             | 0 h-1<br>FPKM | 0 h-2<br>FPKM | 0 h-3<br>FPKM | 48 h-1<br>FPKM | 48 h-2<br>FPKM | 48 h-3<br>FPKM | FDR       | log2FC    | regulated | nr_annotation                                                                               |
|-----------------|---------------|---------------|---------------|----------------|----------------|----------------|-----------|-----------|-----------|---------------------------------------------------------------------------------------------|
| c49762.graph_c2 | 37.5980002    | 36.279015     | 36.8541706    | 19.6146216     | 15.0191339     | 15.2310333     | 2.27E-51  | -2.163044 | down      | PREDICTED: autophagy-related protein 18a-like [Sesamum indicum]                             |
| c49766.graph_c0 | 0             | 0             | 0             | 3.36088084     | 3.99347291     | 2.1822506      | 6.637E-13 | Inf       | up        | predicted protein [Hordeum vulgare subsp. vulgare]                                          |
| c49767.graph_c0 | 0             | 0             | 0             | 3.37273147     | 9.11859382     | 4.12642475     | 1.812E-07 | Inf       | up        | -                                                                                           |
| c49768.graph_c0 | 0             | 0             | 0             | 4.03439999     | 7.3170154      | 2.69951821     | 2.227E-08 | Inf       | up        | PREDICTED: minor protease aeuram-like [Eucalyptus grandis]                                  |
| c49770.graph_c0 | 0             | 0             | 0             | 122.799697     | 244.652058     | 98.9818488     | 1.594E-17 | Inf       | up        | Elongation factor 1-alpha [Auxenochlorella protothecoides]                                  |
| c49771.graph_c1 | 35.6669464    | 35.0041895    | 36.7633146    | 29.2736805     | 23.9137485     | 21.9556164     | 1.15E-26  | -1.528814 | down      | PREDICTED: LOW QUALITY PROTEIN: DUF21 domain-containing protein At4g14240 [Sesamum indicum] |
| c49772.graph_c0 | 14.7893504    | 13.0742354    | 13.1539538    | 47.5953464     | 54.2327084     | 67.7137709     | 4.727E-07 | 1.026599  | up        | PREDICTED: long-chain-alcohol oxidase FAO1 [Sesamum indicum]                                |
| c49772.graph_c1 | 7.67555309    | 6.96949548    | 6.35999985    | 36.9403631     | 37.0870868     | 41.017877      | 1.587E-16 | 1.436774  | up        | PREDICTED: vacuolar protein sorting-associated protein 25 [Nicotiana tomentosiformis]       |
| c49775.graph_c0 | 451.031763    | 419.995523    | 492.212876    | 239.906549     | 205.251787     | 158.112566     | 1.295E-36 | -2.189677 | down      | -                                                                                           |
| c49777.graph_c1 | 0.77990659    | 0             | 0.66814057    | 3.67233754     | 4.8207085      | 6.46421242     | 1.547E-05 | 2.34047   | up        | -                                                                                           |
| c49779.graph_c0 | 0             | 0             | 0             | 1.57887933     | 3.15077041     | 1.01281855     | 3.043E-05 | Inf       | up        | PREDICTED: V-type proton ATPase subunit a1 [Brachypodium distachyon]                        |
| c49781.graph_c0 | 0             | 0             | 0             | 1.2807556      | 1.2017418      | 1.4652111      | 1.207E-11 | Inf       | up        | predicted protein [Physcomitrella patens]                                                   |
| c49784.graph_c0 | 8.0961977     | 7.8419849     | 7.74534823    | 33.7994255     | 34.0699175     | 32.7540979     | 5.13E-14  | 1.070105  | up        | hypothetical protein MIMGU_mgv1a000301mg [Erythranthe guttata]                              |
| c49784.graph_c1 | 46.7565191    | 48.4307929    | 47.2843138    | 25.617838      | 23.9107661     | 22.6720466     | 1.046E-44 | -1.996215 | down      | PREDICTED: BTB/POZ domain-containing protein POB1-like isoform X1 [Sesamum indicum]         |
| c49785.graph_c0 | 863.708163    | 889.458883    | 721.286403    | 143.43044      | 186.045688     | 193.916706     | 4.887E-62 | -3.261646 | down      | -                                                                                           |
| c49787.graph_c1 | 100.509869    | 97.815778     | 93.5030827    | 64.8110221     | 57.1881492     | 52.8933625     | 2.885E-35 | -1.752281 | down      | PREDICTED: uncharacterized protein LOC105163549 [Sesamum indicum]                           |
| c49788.graph_c0 | 1.68460848    | 1.54068211    | 1.48942279    | 1.07643686     | 1.36934114     | 1.21553022     | 1.002E-13 | -1.384906 | down      | PREDICTED: uncharacterized protein LOC105155957 isoform X2 [Sesamum indicum]                |
| c49790.graph_c0 | 5.88601469    | 6.66791612    | 5.64514914    | 30.2341936     | 30.0118581     | 24.7133104     | 1.138E-11 | 1.208032  | up        | PREDICTED: UDP-glycosyltransferase 76F1-like [Sesamum indicum]                              |
| c49795.graph_c1 | 35.7040434    | 37.0489456    | 35.9934222    | 14.1973601     | 14.4234493     | 14.5446091     | 2.981E-59 | -2.350747 | down      | PREDICTED: putative receptor-like protein kinase At5g39000 [Sesamum indicum]                |
| c49798.graph_c2 | 16.1605151    | 17.7541267    | 14.7744625    | 10.8290708     | 11.8644297     | 10.6110696     | 4.764E-27 | -1.564911 | down      | PREDICTED: leukocyte receptor cluster member 8 homolog isoform X1 [Sesamum indicum]         |
| c49799.graph_c0 | 0             | 0             | 0             | 6.59492231     | 13.0581395     | 6.077698       | 4.183E-09 | Inf       | up        | -                                                                                           |
| c49801.graph_c0 | 9.99770143    | 9.03211799    | 8.92856829    | 41.3315502     | 42.8652521     | 37.7816706     | 1.35E-12  | 1.10895   | up        | PREDICTED: uncharacterized protein LOC105163678 [Sesamum indicum]                           |

| #ID             | 0 h-1<br>FPKM | 0 h-2<br>FPKM | 0 h-3<br>FPKM | 48 h-1<br>FPKM | 48 h-2<br>FPKM | 48 h-3<br>FPKM | FDR       | log2FC    | regulated | nr_annotation                                                                                                                                               |
|-----------------|---------------|---------------|---------------|----------------|----------------|----------------|-----------|-----------|-----------|-------------------------------------------------------------------------------------------------------------------------------------------------------------|
| c49804.graph_c0 | 652.740692    | 620.700423    | 647.682178    | 337.27915      | 317.68547      | 283.026675     | 9.359E-29 | -2.049751 | down      | PREDICTED: histidinol-phosphate aminotransferase, chloroplastic-like [Sesamum indicum]                                                                      |
| c49805.graph_c0 | 0             | 0             | 0             | 5.40537216     | 9.20304059     | 3.34004697     | 3.599E-10 | Inf       | up        | PREDICTED: unfunctional UDP-glucose 4,0-dehydratase/UDP-4-keto-6-deoxy-D-glucose 3,5-epimerase/UDP-4-keto-L-rhamnose-reductase RHM1 [Taranaxa hirsutissima] |
| c49806.graph_c0 | 3.19524847    | 2.43463955    | 3.15612046    | 18.4968003     | 13.3349193     | 9.77336203     | 0.0098317 | 1.23439   | up        | PREDICTED: pentatricopeptide repeat-containing protein At5g66520-like [Sesamum indicum]                                                                     |
| c49807.graph_c0 | 0             | 0             | 0             | 2.26039577     | 4.12405956     | 1.92748296     | 3.491E-09 | Inf       | up        | eukaryotic initiation factor 4A [Ectocarpus siliculosus]                                                                                                    |
| c49808.graph_c0 | 0             | 0             | 0             | 3.60584565     | 4.20195186     | 4.65226668     | 1.917E-12 | Inf       | up        | -                                                                                                                                                           |
| c49809.graph_c0 | 3.83310858    | 2.33046664    | 2.86887083    | 0              | 0              | 0              | 6.854E-51 | -Inf      | down      | --                                                                                                                                                          |
| c49811.graph_c0 | 0             | 0             | 0             | 1.53018874     | 2.55955172     | 1.71985609     | 5.771E-11 | Inf       | up        | DEAD-box ATP-dependent RNA helicase 15 [Arabidopsis thaliana]                                                                                               |
| c49812.graph_c0 | 0             | 0             | 0             | 4.93862241     | 14.6829945     | 10.4188776     | 2.234E-10 | Inf       | up        | Short-chain dehydrogenase/reductase SDR [Macrophomina phaseolina MS6]                                                                                       |
| c49813.graph_c0 | 0             | 0             | 0             | 0.74035706     | 1.41924305     | 0.65876526     | 8.437E-06 | Inf       | up        | predicted protein [Physcomitrella patens]                                                                                                                   |
| c49814.graph_c0 | 0             | 0             | 0             | 1.53823748     | 1.78116456     | 1.33688389     | 3.917E-12 | Inf       | up        | PREDICTED: serine--tRNA ligase-like [Nelumbo nucifera]                                                                                                      |
| c49817.graph_c0 | 0.57292792    | 0.55500157    | 0.48686512    | 2.22194593     | 2.47112546     | 2.08312408     | 0.0004284 | 1.052523  | up        | PREDICTED: pleiotropic drug resistance protein 2-like [Sesamum indicum]                                                                                     |
| c49818.graph_c0 | 75.8049888    | 74.9820914    | 77.9369225    | 49.5072102     | 50.4552322     | 50.2518451     | 5.445E-30 | -1.624683 | down      | PREDICTED: uncharacterized protein LOC105158481 isoform X1 [Sesamum indicum]                                                                                |
| c49823.graph_c0 | 10.8938452    | 11.1220586    | 9.82721226    | 6.69074716     | 6.75096842     | 5.80778746     | 4.141E-33 | -1.741433 | down      | PREDICTED: uncharacterized protein LOC105179488 isoform X2 [Sesamum indicum]                                                                                |
| c49823.graph_c1 | 0.96552072    | 1.30943473    | 1.1606851     | 0.37301641     | 0.36476829     | 0.63828414     | 1.587E-06 | -2.342422 | down      | -                                                                                                                                                           |
| c49823.graph_c2 | 2.6870455     | 2.21654184    | 2.68563544    | 8.48081651     | 13.1609271     | 14.05221       | 5.692E-05 | 1.207289  | up        | PREDICTED: transmembrane protein $\delta/B$ [Sesamum indicum]                                                                                               |
| c49825.graph_c0 | 1.51217241    | 0.86496378    | 0.83280061    | 5.83780206     | 5.20055468     | 4.89930246     | 0.0076021 | 1.301775  | up        | PREDICTED: protein CHROMATIN REMODELING 4 [Sesamum indicum]                                                                                                 |
| c49826.graph_c0 | 0             | 0             | 0             | 0.90474317     | 1.72991366     | 1.04065504     | 7.2E-10   | Inf       | up        | Methylmalonyl-CoA mutase, alpha chain, catalytic domain-containing protein [Rozella allomyces CSF55]                                                        |
| c49829.graph_c1 | 0             | 0             | 0             | 2.96922311     | 8.58356997     | 1.83596393     | 0.0006335 | Inf       | up        | PREDICTED: trypsin protease SEN102-like [Oryza brachyantha]                                                                                                 |
| c49830.graph_c0 | 9.71242979    | 9.13837694    | 10.4919905    | 6.86061041     | 9.21633017     | 9.32227907     | 1.27E-12  | -1.232241 | down      | PREDICTED: uncharacterized protein LOC105178939 [Sesamum indicum]                                                                                           |
| c49837.graph_c0 | 20.6940312    | 22.6322339    | 19.4247506    | 4.17868774     | 4.77553346     | 4.01920478     | 3.95E-110 | -3.291791 | down      | PREDICTED: leucine-rich repeat receptor protein kinase EXS [Sesamum indicum]                                                                                |
| c49840.graph_c0 | 0             | 0             | 0             | 23.5293658     | 57.4052572     | 22.4267855     | 1.624E-10 | Inf       | up        | predicted protein [Hordeum vulgare subsp. vulgare]                                                                                                          |
| c49842.graph_c0 | 2.06303875    | 1.6826778     | 1.27644904    | 8.30635155     | 8.65042697     | 9.42658237     | 1.794E-05 | 1.378649  | up        | -                                                                                                                                                           |
| c49846.graph_c0 | 0             | 0             | 0             | 2.50834859     | 2.75450915     | 1.30648595     | 5.559E-10 | Inf       | up        | predicted protein [Micromonas sp. RCC299]                                                                                                                   |

| #ID             | 0 h-1<br>FPKM | 0 h-2<br>FPKM | 0 h-3<br>FPKM | 48 h-1<br>FPKM | 48 h-2<br>FPKM | 48 h-3<br>FPKM | FDR       | log2FC    | regulated | nr_annotation                                                                                               |
|-----------------|---------------|---------------|---------------|----------------|----------------|----------------|-----------|-----------|-----------|-------------------------------------------------------------------------------------------------------------|
| c49847.graph_c1 | 13.4277615    | 12.5970736    | 12.170338     | 12.8187373     | 8.04031249     | 7.17862368     | 6.412E-15 | -1.452013 | down      | hypothetical protein JCGZ_09714 [Jatropha curcas]                                                           |
| c49852.graph_c0 | 0             | 0             | 0             | 0.88075592     | 1.49854144     | 0.9736771      | 1.693E-11 | Inf       | up        | hypothetical protein M422DRAFT_230321 [Sphaerobolus stellatus SS14]                                         |
| c49855.graph_c0 | 0             | 0             | 0             | 1.30121533     | 1.55520805     | 0.83125077     | 7.305E-10 | Inf       | up        | enolase [Rhizoctonia solani AG-1 IB]                                                                        |
| c49857.graph_c2 | 1.87316663    | 3.303646      | 2.98021073    | 0.82175394     | 0.87054866     | 0.43871503     | 1.165E-08 | -2.95294  | down      | -                                                                                                           |
| c49858.graph_c0 | 0.04385115    | 0             | 0             | 35.3891221     | 75.8797118     | 30.5544222     | 4.012E-13 | 10.65388  | up        | protein of unknown function [1] aprina deformans F1CC57101                                                  |
| c49861.graph_c1 | 25.3056211    | 29.4924759    | 24.1567672    | 9.93585901     | 10.3494271     | 9.72989339     | 1.613E-39 | -2.411976 | down      | hypothetical protein POP1K_0001S24240G [Populus trichocarpa]                                                |
| c49862.graph_c0 | 1.96765452    | 2.70823414    | 3.0552877     | 0.90636584     | 1.20023088     | 1.68016432     | 4.221E-05 | -2.058119 | down      | hypothetical protein PHAVU_0010025000G [Rneseous vulgare]                                                   |
| c49863.graph_c0 | 0             | 0             | 0             | 2.17588553     | 4.105936       | 2.05709547     | 2.182E-09 | Inf       | up        | -                                                                                                           |
| c49864.graph_c0 | 0             | 0             | 0             | 5.72167958     | 6.86119718     | 3.85369204     | 1.863E-17 | Inf       | up        | hypothetical protein EUTSA_v10013921mg [Eutrema salsugineum]                                                |
| c49865.graph_c1 | 4.24873402    | 4.04552563    | 3.8618037     | 174.8984       | 141.491169     | 117.057448     | 1.328E-19 | 4.145331  | up        | PREDICTED: uncharacterized protein LOC105161592 [Sesamum indicum]                                           |
| c49867.graph_c0 | 0             | 0             | 0             | 3.22549734     | 9.45376452     | 2.0090197      | 0.0026404 | Inf       | up        | GAMM1 protein [Cryptococcus neoformans var. neoformans JEC21]                                               |
| c49868.graph_c0 | 5.37990237    | 4.49091282    | 5.03235984    | 2.41686128     | 3.24684787     | 3.33484672     | 5.598E-16 | -1.750806 | down      | PREDICTED: protein FAR1-RELATED SEQUENCE 8 isoform X1 [Sesamum indicum]                                     |
| c49870.graph_c0 | 0             | 0             | 0             | 3.58309142     | 5.99531589     | 2.53269273     | 1.212E-09 | Inf       | up        | --                                                                                                          |
| c49872.graph_c2 | 145.743505    | 148.195115    | 144.080977    | 90.5961038     | 86.1133427     | 82.0736627     | 1.434E-34 | -1.775105 | down      | PREDICTED: putative RNA polymerase II subunit B1 CID phosphatase RPAP2 homolog isoform X3 [Sesamum indicum] |
| c49873.graph_c0 | 0             | 0             | 0             | 1.03237505     | 1.58759446     | 0.80007194     | 3.264E-08 | Inf       | up        | hypothetical protein MIMGU_mgv1a007681mg [Erythranthe guttata]                                              |
| c49876.graph_c0 | 12.4322794    | 11.0334706    | 11.8172777    | 49.5626377     | 51.8801658     | 50.4831638     | 3.039E-13 | 1.088344  | up        | PREDICTED: serine/threonine-protein kinase HT1 [Sesamum indicum]                                            |
| c49876.graph_c4 | 4.31846532    | 5.22337078    | 6.01184882    | 2.81807012     | 2.98540358     | 3.39250249     | 0.0003613 | -1.780577 | down      | -                                                                                                           |
| c49876.graph_c7 | 0             | 0             | 0             | 2.20195629     | 1.09190479     | 1.41735689     | 9.71E-07  | Inf       | up        | PREDICTED: squalene monooxygenase-like [Sesamum indicum]                                                    |
| c49878.graph_c0 | 0             | 0             | 0             | 2.34702434     | 2.30878858     | 1.62729985     | 2.988E-22 | Inf       | up        | --                                                                                                          |
| c49879.graph_c0 | 10.3102536    | 9.60881382    | 9.9531297     | 2.62026983     | 2.50322924     | 3.22662994     | 9.787E-47 | -2.85743  | down      | PREDICTED: protein RMD5 homolog A-like isoform X1 [Sesamum indicum]                                         |
| c49879.graph_c1 | 53.227144     | 45.1155428    | 49.1187359    | 30.4968592     | 26.2645529     | 22.8898334     | 1.671E-35 | -1.901636 | down      | -                                                                                                           |
| c49880.graph_c0 | 0.68619741    | 0.75335723    | 0.56889732    | 0.30588862     | 0.25924152     | 0.21774228     | 1.353E-06 | -2.369647 | down      | PREDICTED: probable sulfate transporter 3.4 [Eucalyptus grandis]                                            |
| c49880.graph_c1 | 7.40400713    | 6.72698909    | 7.30528419    | 4.31940114     | 3.79416862     | 4.14764452     | 4.3E-22   | -1.821762 | down      | hypothetical protein MIMGU_mgv1a013752mg [Erythranthe guttata]                                              |
| c49882.graph_c0 | 0             | 0             | 0             | 2.20094056     | 5.7888736      | 1.62073132     | 0.0007145 | Inf       | up        | -                                                                                                           |
| c49883.graph_c0 | 0             | 0             | 0             | 1.98300039     | 2.57341687     | 1.19101173     | 4.439E-08 | Inf       | up        | unnamed protein product [Vitis vinifera]                                                                    |

| #ID             | 0 h-1<br>FPKM | 0 h-2<br>FPKM | 0 h-3<br>FPKM | 48 h-1<br>FPKM | 48 h-2<br>FPKM | 48 h-3<br>FPKM | FDR       | log2FC    | regulated | nr_annotation                                                                          |
|-----------------|---------------|---------------|---------------|----------------|----------------|----------------|-----------|-----------|-----------|----------------------------------------------------------------------------------------|
| c49885.graph_c0 | 0             | 0             | 0             | 1.23259972     | 2.76224795     | 1.89823815     | 4.424E-08 | Inf       | up        | hypothetical protein ESQ_00045 [Mimosa osmundae IAM 143241]                            |
| c49886.graph_c0 | 18.3498417    | 16.2323772    | 24.67703      | 0              | 0              | 0              | 5.832E-26 | -Inf      | down      | -                                                                                      |
| c49891.graph_c1 | 155.030149    | 154.995171    | 162.306206    | 36.0925733     | 40.8630573     | 36.2688696     | 2.506E-92 | -3.080042 | down      | PREDICTED: zinc finger protein AZF2-like [Sesamum indicum]                             |
| c49894.graph_c0 | 3.85440493    | 3.59445158    | 3.64071293    | 11.5632824     | 17.5228165     | 17.0402115     | 1.24E-05  | 1.032036  | up        | PREDICTED: beta-hexosaminidase 1 [Sesamum indicum]                                     |
| c49895.graph_c0 | 0             | 0             | 0             | 0.85889289     | 1.98522082     | 1.04214236     | 5.924E-06 | Inf       | up        | Diphosphomevalonate decarboxylase [Ectocarpus siliculosus]                             |
| c49898.graph_c0 | 63.9589222    | 65.5561734    | 64.8034546    | 50.4139124     | 66.1590733     | 65.9933793     | 7.248E-15 | -1.112471 | down      | PREDICTED: LOW QUALITY PROTEIN: uncharacterized protein LOC105160697 [Sesamum indicum] |
| c49903.graph_c0 | 0             | 0             | 0             | 1.26885995     | 4.59859011     | 1.3072909      | 0.0008631 | Inf       | up        | -                                                                                      |
| c49905.graph_c0 | 0             | 0             | 0             | 8.6192177      | 11.5525009     | 11.821782      | 3.502E-32 | Inf       | up        | PREDICTED: 2-methylene-furan-3-one reductase-like [Solanum lycopersicum]               |
| c49906.graph_c0 | 0.12087279    | 0.12099383    | 0             | 4.45423594     | 8.25776502     | 12.3854761     | 2.906E-06 | 5.683556  | up        | -                                                                                      |
| c49907.graph_c0 | 0.20853313    | 0.24353227    | 0.17864889    | 1.92114322     | 2.44226195     | 2.64960361     | 4.842E-06 | 2.454741  | up        | hypothetical protein MIMGU_mgv1a022633mg, partial [Erythranthe guttata]                |
| c49908.graph_c0 | 0             | 0             | 0             | 1.50550704     | 1.49824142     | 1.38018478     | 2.04E-11  | Inf       | up        | PREDICTED: probable disease resistance protein At5g63020 [Vitis vinifera]              |
| c49909.graph_c0 | 30.2317121    | 30.0268748    | 27.2071981    | 121.88476      | 129.51509      | 116.34627      | 6.35E-14  | 1.055239  | up        | PREDICTED: putative late blight resistance protein homolog R1A-10 [Sesamum indicum]    |
| c49910.graph_c0 | 0             | 0             | 0             | 2.66298809     | 1.15409167     | 2.26180576     | 1.456E-06 | Inf       | up        | -                                                                                      |
| c49911.graph_c1 | 6.96848646    | 6.68482       | 5.96985399    | 0.53498535     | 0.9918162      | 0.9520535      | 1.667E-14 | -4.011116 | down      | -                                                                                      |
| c49912.graph_c2 | 34.5771473    | 29.1693685    | 33.6465087    | 131.549023     | 162.26112      | 152.120074     | 3.119E-17 | 1.173697  | up        | PREDICTED: translocon-associated protein subunit alpha-like [Sesamum indicum]          |
| c49914.graph_c0 | 0             | 0             | 0             | 0.8854374      | 2.04973334     | 1.28391491     | 1.982E-07 | Inf       | up        | hypothetical protein GUIHDRAFT_71484 [Guillardia theta CCMP2712]                       |
| c49917.graph_c0 | 37.262477     | 37.772604     | 37.9023551    | 35.4406783     | 33.3961883     | 30.1151865     | 2.185E-15 | -1.206296 | down      | PREDICTED: ues1-like protein At4g17480 [Sesamum indicum]                               |
| c49918.graph_c1 | 0.10946606    | 0             | 0             | 2.82372359     | 6.51696277     | 6.28133067     | 1.259E-07 | 6.147373  | up        | unnamed protein product [Coffea canephora]                                             |
| c49920.graph_c0 | 0.03615507    | 0.4704866     | 0.0464607     | 31.076748      | 32.8514738     | 27.2073391     | 2.37E-100 | 6.355779  | up        | hypothetical protein MIMGU_mgv1a020088mg [Erythranthe guttata]                         |
| c49921.graph_c0 | 4.93395916    | 4.10583234    | 5.19448957    | 28.5325022     | 28.8923411     | 24.9007543     | 2.512E-11 | 1.514154  | up        | PREDICTED: transcription factor GTE1-like isoform X2 [Sesamum indicum]                 |
| c49922.graph_c0 | 0             | 0             | 0             | 0.8535632      | 1.94413044     | 1.61392774     | 5.116E-10 | Inf       | up        | PREDICTED: neutral ceramidase-like [Cicer arietinum]                                   |
| c49923.graph_c0 | 0             | 0             | 0             | 5.10747886     | 7.01707229     | 3.33744355     | 1.061E-12 | Inf       | up        | -                                                                                      |
| c49925.graph_c0 | 0             | 0             | 0             | 2.46776739     | 2.72796555     | 1.38431159     | 5.033E-09 | Inf       | up        | -                                                                                      |
| c49926.graph_c0 | 0             | 0             | 0             | 42.1315714     | 71.7349472     | 39.71746       | 3.964E-22 | Inf       | up        | cysteine protease 1 [Brachiaria hybrid cultivar]                                       |
| c49927.graph_c1 | 0             | 0             | 0             | 3.49526504     | 3.03630378     | 3.98088424     | 7.644E-13 | Inf       | up        | -                                                                                      |

| #ID             | 0 h-1<br>FPKM | 0 h-2<br>FPKM | 0 h-3<br>FPKM | 48 h-1<br>FPKM | 48 h-2<br>FPKM | 48 h-3<br>FPKM | FDR       | log2FC    | regulated | nr_annotation                                                                             |
|-----------------|---------------|---------------|---------------|----------------|----------------|----------------|-----------|-----------|-----------|-------------------------------------------------------------------------------------------|
| c49928.graph_c0 | 0             | 0             | 0             | 1.45697923     | 2.54676316     | 1.55569363     | 9.027E-09 | Inf       | up        | hypothetical protein M422DRAFT_237710 [Sphaerobolus stellatus SS14]                       |
| c49929.graph_c0 | 0             | 0             | 0             | 5.28457191     | 3.03842786     | 6.37004768     | 9.924E-15 | Inf       | up        | -                                                                                         |
| c49930.graph_c0 | 0             | 0             | 0             | 1.34971484     | 1.42985922     | 0.95632649     | 1.014E-12 | Inf       | up        | hypothetical protein CHLNDRAFT_1_58400 [Chlorella variabilis]                             |
| c49931.graph_c2 | 0.40644173    | 0.40684872    | 0.52229371    | 2.4338641      | 3.37173278     | 3.88704192     | 0.0005267 | 1.832279  | up        | PREDICTED: ethylene-responsive transcription factor CRF2-like [Sesamum indicum]           |
| c49931.graph_c4 | 0.18640286    | 0.06219651    | 0.19961255    | 11.6201581     | 10.2180297     | 9.90661014     | 3.505E-38 | 5.12739   | up        | PREDICTED: uncharacterized protein LOC105177468 [Sesamum indicum]                         |
| c49932.graph_c0 | 3.60354619    | 1.69085372    | 2.46005912    | 94.5111766     | 45.2807137     | 58.6175934     | 5.106E-06 | 3.674684  | up        | Cell wall-associated hydrolase, partial [Medicago truncatula]                             |
| c49934.graph_c0 | 0.06158839    | 0             | 0             | 4.59587873     | 6.37148495     | 2.97868803     | 1.168E-09 | 6.825127  | up        | ATP-dependent RNA helicase ded1 [Exophiala dermatitidis NIH/UT8656]                       |
| c49934.graph_c1 | 0             | 0             | 0             | 1.14422831     | 2.25904624     | 1.2957986      | 2.837E-07 | Inf       | up        | hypothetical protein TPAUC_54095 [Thalassiosira oceanica]                                 |
| c49935.graph_c0 | 0             | 0             | 0             | 3.53129033     | 7.59885325     | 2.84754706     | 3.021E-07 | Inf       | up        | -                                                                                         |
| c49936.graph_c1 | 138.427737    | 146.948886    | 155.535118    | 13.6180495     | 19.2245333     | 20.5381974     | 2.59E-151 | -4.071261 | down      | PREDICTED: heat shock protein 85-like [Sesamum indicum]                                   |
| c49936.graph_c4 | 10.9950024    | 10.7599429    | 8.95986217    | 53.7759483     | 85.3664027     | 98.1904297     | 1.39E-06  | 1.925542  | up        | PREDICTED: 4-coumarate--CoA ngase 2 [Sesamum indicum]                                     |
| c49938.graph_c0 | 0             | 0             | 0             | 6.2928146      | 17.1295498     | 10.646219      | 5.901E-12 | Inf       | up        | -                                                                                         |
| c49940.graph_c0 | 0             | 0             | 0             | 2.0218147      | 4.51598573     | 1.43052898     | 5.803E-06 | Inf       | up        | PREDICTED: DEAD-box ATP-dependent RNA helicase 7-like [Musa acuminata subsp. malaccensis] |
| c49941.graph_c0 | 10.7739427    | 9.93111341    | 9.94270028    | 9.61907465     | 9.05348302     | 9.65018137     | 5.277E-12 | -1.129993 | down      | hypothetical protein MIMGU_mgv1a019692mg [Erythranthe guttata]                            |
| c49943.graph_c0 | 0             | 0             | 0             | 0.67065262     | 1.72009767     | 0.94222526     | 1.663E-05 | Inf       | up        | predicted protein [Ostreococcus lucimarinus CCE9901]                                      |
| c49944.graph_c0 | 0             | 0             | 0             | 1.24576383     | 3.60252183     | 1.52789544     | 2.858E-05 | Inf       | up        | predicted protein [Hordeum vulgare subsp. vulgare]                                        |
| c49947.graph_c0 | 0             | 0             | 0             | 0.63687725     | 0.76465346     | 0.41557234     | 1.768E-09 | Inf       | up        | hypothetical protein SELMODRAFT_141243 [Selaginella moellendorffii]                       |
| c49948.graph_c1 | 0             | 0             | 0             | 3.81050694     | 7.10822553     | 5.45438904     | 1.952E-13 | Inf       | up        | hypothetical protein SELMODRAFT_424962 [Selaginella moellendorffii]                       |
| c49949.graph_c0 | 0             | 0             | 0             | 13.7240922     | 21.0072692     | 8.78551038     | 6.542E-15 | Inf       | up        | ATP synthase subunit alpha [Lipirina aeriformans F1CC 57101]                              |
| c49952.graph_c0 | 0             | 0             | 0             | 1.7292248      | 1.86582815     | 3.10580125     | 2.601E-11 | Inf       | up        | -                                                                                         |
| c49954.graph_c0 | 0             | 0             | 0             | 4.37201289     | 4.23575278     | 3.39144837     | 7.56E-19  | Inf       | up        | -                                                                                         |
| c49959.graph_c0 | 0             | 0             | 0             | 2.11413996     | 3.56050886     | 1.68821066     | 6.694E-08 | Inf       | up        | predicted protein [Physcomitrella patens]                                                 |
| c49963.graph_c0 | 2.83546742    | 2.2924785     | 2.24226948    | 2.0093981      | 1.1707925      | 1.60915531     | 0.0009739 | -1.62947  | down      | -                                                                                         |
| c49964.graph_c0 | 0             | 0             | 0             | 3.50756156     | 4.27107605     | 3.44387        | 2.872E-17 | Inf       | up        | hypothetical protein GUTHDRAFT_68249 [Guillardia theta CCMP2712]                          |
| c49965.graph_c0 | 43.7600898    | 51.4851631    | 39.4137542    | 40.420796      | 38.8402047     | 33.0004825     | 5.096E-13 | -1.276104 | down      | PREDICTED: uncharacterized protein LOC105161315 [Sesamum indicum]                         |

| #ID             | 0 h-1<br>FPKM | 0 h-2<br>FPKM | 0 h-3<br>FPKM | 48 h-1<br>FPKM | 48 h-2<br>FPKM | 48 h-3<br>FPKM | FDR       | log2FC    | regulated | nr_annotation                                                                 |
|-----------------|---------------|---------------|---------------|----------------|----------------|----------------|-----------|-----------|-----------|-------------------------------------------------------------------------------|
| c49968.graph_c0 | 26.0905411    | 22.190632     | 21.8037525    | 89.3899306     | 102.436716     | 104.280866     | 2.993E-11 | 1.060177  | up        | PREDICTED: uncharacterized protein LOC105161736 [Sesamum indicum]             |
| c49971.graph_c0 | 0             | 0             | 0             | 0.61774899     | 1.37118698     | 0.91611556     | 2.078E-07 | Inf       | up        | predicted protein [Physcomitrella patens]                                     |
| c49972.graph_c3 | 0             | 0             | 0             | 1.81566006     | 2.71728538     | 1.10268613     | 4.978E-08 | Inf       | up        | ABC-2 type transporter domain-containing protein [Rozella allomyces CSF55]    |
| c49974.graph_c0 | 18.2763036    | 11.0260411    | 12.2568852    | 0.22676529     | 0.48046066     | 0.25221799     | 1.137E-24 | -6.461407 | down      | predicted protein [Hordeum vulgare subsp. vulgare]                            |
| c49975.graph_c1 | 48.5475955    | 48.8760332    | 50.7706082    | 346.69908      | 357.55481      | 370.005586     | 2.223E-36 | 1.839043  | up        | PREDICTED: 60S ribosomal protein L5-like [Sesamum indicum]                    |
| c49978.graph_c0 | 0             | 0             | 0             | 6.27881178     | 11.3564581     | 10.1925927     | 1.117E-24 | Inf       | up        | glutathione-independent formaldehyde dehydrogenase [Bathycoccus prasinus]     |
| c49979.graph_c0 | 0             | 0             | 0             | 2.4018758      | 2.87638697     | 1.5331905      | 2.131E-10 | Inf       | up        | -                                                                             |
| c49982.graph_c0 | 0             | 0             | 0             | 1.61460462     | 2.47408399     | 1.84714134     | 1.151E-14 | Inf       | up        | PREDICTED: glucose-6-phosphate isomerase, cytosolic 2-like [Cucumis sativus]  |
| c49985.graph_c0 | 0             | 0             | 0             | 2.82144046     | 6.54547482     | 1.84315245     | 2.493E-05 | Inf       | up        | lipoamide dehydrogenase [Chondrus crispus]                                    |
| c49987.graph_c0 | 0             | 0             | 0             | 1.5161654      | 2.07250761     | 1.26203777     | 2.2E-11   | Inf       | up        | -                                                                             |
| c49989.graph_c0 | 0             | 0             | 0             | 1.80180723     | 2.97547655     | 1.69754531     | 8.198E-10 | Inf       | up        | threonyl-tRNA synthetase [Mucor circinelloides f. circinelloides 1006PhL]     |
| c49993.graph_c0 | 0             | 0             | 0             | 0.58248165     | 0.39927974     | 0.47255732     | 1.961E-11 | Inf       | up        | secreted protein [Achlya hypogyna]                                            |
| c49995.graph_c0 | 0             | 0             | 0             | 1.26669391     | 1.62441568     | 1.24573837     | 1.659E-09 | Inf       | up        | hypothetical protein GUTHDRAFT_99801 [Guillardia theta CCMP2712]              |
| c49998.graph_c0 | 0             | 0             | 0             | 5.88157072     | 11.8473167     | 4.97540243     | 2.352E-09 | Inf       | up        | predicted protein [Physcomitrella patens]                                     |
| c50003.graph_c0 | 0             | 0             | 0             | 1.94025247     | 5.85806733     | 2.1148706      | 1.245E-05 | Inf       | up        | -                                                                             |
| c50004.graph_c1 | 19.910867     | 20.6706954    | 17.7896681    | 10.7250202     | 11.2867139     | 9.68191254     | 8.943E-40 | -1.896986 | down      | hypothetical protein MIMGU_mgv1a002674mg [Erythranthe guttata]                |
| c50010.graph_c0 | 49.3063131    | 50.1481665    | 45.8621427    | 176.912202     | 204.26107      | 259.278554     | 6.392E-07 | 1.118829  | up        | PREDICTED: putative GTP diphosphokinase RSH1, chloroplastic [Sesamum indicum] |
| c50012.graph_c0 | 0             | 0             | 0             | 5.23237868     | 10.1811504     | 5.60588992     | 2.366E-09 | Inf       | up        | -                                                                             |
| c50013.graph_c0 | 0             | 0             | 0             | 2.64846774     | 3.11747826     | 2.42205152     | 1.22E-11  | Inf       | up        | predicted protein [Micromonas pusilla CCMP1545]                               |
| c50014.graph_c2 | 27.2344229    | 32.187331     | 23.2898031    | 9.96423636     | 10.936293      | 13.2991764     | 1.436E-21 | -2.292522 | down      | PREDICTED: uncharacterized protein LOC104210641 [Nicotiana glauca]            |
| c50016.graph_c0 | 0             | 0             | 0             | 2.2604188      | 4.72086099     | 1.78144339     | 1.738E-05 | Inf       | up        | -                                                                             |
| c50016.graph_c1 | 0             | 0             | 0             | 9.83941516     | 13.898223      | 10.7492588     | 1.453E-30 | Inf       | up        | -                                                                             |
| c50017.graph_c0 | 22.9884978    | 24.6798523    | 22.8943756    | 14.1895974     | 19.8559101     | 24.2623004     | 1.548E-13 | -1.299744 | down      | PREDICTED: bifunctional epoxide hydrolase 2-like [Sesamum indicum]            |
| c50017.graph_c2 | 218.172584    | 227.042797    | 205.305941    | 58.1509608     | 32.9746973     | 23.1874545     | 2.83E-99  | -3.510473 | down      | hypothetical protein MIMGU_mgv1a011129mg [Erythranthe guttata]                |



| #ID             | 0 h-1<br>FPKM | 0 h-2<br>FPKM | 0 h-3<br>FPKM | 48 h-1<br>FPKM | 48 h-2<br>FPKM | 48 h-3<br>FPKM | FDR       | log2FC    | regulated | nr_annotation                                                                                      |
|-----------------|---------------|---------------|---------------|----------------|----------------|----------------|-----------|-----------|-----------|----------------------------------------------------------------------------------------------------|
| c50017.graph_c3 | 111.650546    | 107.283219    | 107.866323    | 75.5430725     | 74.5040598     | 86.9279138     | 1.324E-25 | -1.481829 | down      | PREDICTED: bifunctional epoxide hydrolase 2 [Sesamum indicum]                                      |
| c50018.graph_c0 | 327.876509    | 340.304545    | 331.371981    | 27.7469452     | 24.0858139     | 19.4870212     | 2.37E-204 | -4.82181  | down      | PREDICTED: uncharacterized protein LOC103433973 [Malus domestica]                                  |
| c50018.graph_c5 | 236.112247    | 241.150458    | 235.173646    | 114.730916     | 119.654387     | 117.898687     | 2.146E-35 | -2.034008 | down      | PREDICTED: UBP1-associated protein 2A-like [Sesamum indicum]                                       |
| c50019.graph_c0 | 0             | 0             | 0             | 2.07515049     | 1.73063195     | 0.94287137     | 4.488E-07 | Inf       | up        | protein of unknown function [Lipmania geliformans F10057101]                                       |
| c50020.graph_c0 | 0             | 0             | 0             | 1.8463254      | 3.13691358     | 1.11589759     | 1.987E-06 | Inf       | up        | mitochondrial translation elongation factor Tu [Guillardia theta CCMP2712]                         |
| c50021.graph_c0 | 17.2431989    | 16.592825     | 16.5115092    | 9.75904678     | 10.5108355     | 9.64837904     | 1.609E-31 | -1.768774 | down      | PREDICTED: pentatricopeptide repeat-containing protein At3g53170-like isoform X1 [Sesamum indicum] |
| c50022.graph_c0 | 5.43715381    | 5.11274386    | 4.41095828    | 17.481116      | 27.0148707     | 22.5552837     | 3.913E-06 | 1.141913  | up        | PREDICTED: xyloglucan galactosyltransferase KATAMARI1 homolog [Sesamum indicum]                    |
| c50023.graph_c0 | 3.18766239    | 3.56080848    | 3.14641211    | 36.9426147     | 40.3085039     | 37.4536083     | 3.534E-37 | 2.517132  | up        | hypothetical protein MIMGU_mgv1a000846mg [Erythranthe guttata]                                     |
| c50024.graph_c0 | 5.75482065    | 5.70821429    | 4.43710343    | 1.06034323     | 2.75720337     | 3.21643305     | 2.599E-10 | -2.207001 | down      | hypothetical protein MIMGU_mgv1a022598mg, partial [Erythranthe guttata]                            |
| c50024.graph_c1 | 0.22769295    | 0.15954467    | 0.14629723    | 5.8944134      | 7.37774448     | 6.9993064      | 5.94E-28  | 4.23      | up        | hypothetical protein CICLE_V10007524mg [Citrus clementina]                                         |
| c50026.graph_c0 | 0             | 0             | 0             | 1.73049411     | 1.31269658     | 1.02652217     | 3.634E-12 | Inf       | up        | PREDICTED: uncharacterized protein LOC100820133 [Glycine max]                                      |
| c50027.graph_c0 | 0             | 0             | 0             | 4.20245591     | 8.62860394     | 4.31756536     | 4.829E-10 | Inf       | up        | -                                                                                                  |
| c50029.graph_c0 | 0             | 0             | 0             | 7.78426428     | 13.9383509     | 5.0065765      | 4.371E-09 | Inf       | up        | -                                                                                                  |
| c50030.graph_c0 | 1.84634767    | 1.97259435    | 1.27756992    | 10.7782992     | 10.9678066     | 10.2599065     | 6.065E-15 | 1.637472  | up        | PREDICTED: uncharacterized protein LOC105168379 [Sesamum indicum]                                  |
| c50031.graph_c0 | 183.628845    | 188.776871    | 193.922113    | 153.927557     | 148.683258     | 143.42258      | 1.146E-20 | -1.361431 | down      | PREDICTED: putative ATP-dependent RNA helicase DHX33 [Sesamum indicum]                             |
| c50037.graph_c1 | 0             | 0             | 0             | 3.28857584     | 3.94836032     | 2.63353951     | 2.417E-11 | Inf       | up        | -                                                                                                  |
| c50037.graph_c2 | 0             | 0             | 0             | 3.99292632     | 4.15448518     | 5.96376593     | 1.783E-14 | Inf       | up        | -                                                                                                  |
| c50039.graph_c2 | 0.18258516    | 0.18276799    | 0.11731458    | 23.5493099     | 34.9266936     | 43.4047854     | 3.632E-21 | 6.700206  | up        | hypothetical protein MIMGU_mgv1a001711mg [Erythranthe guttata]                                     |
| c50041.graph_c0 | 0             | 0             | 0             | 2.70356951     | 5.27414287     | 3.34439839     | 4.384E-13 | Inf       | up        | phosphoric diester hydrolase, putative [Ricinus communis]                                          |
| c50042.graph_c1 | 51.2449039    | 51.0799607    | 50.3049475    | 28.5609453     | 28.4857252     | 27.0249361     | 5.529E-40 | -1.877114 | down      | PREDICTED: uncharacterized calcium-binding protein At1g02270 [Sesamum indicum]                     |
| c50044.graph_c0 | 12.9025087    | 11.6519628    | 12.254956     | 69.5109603     | 62.414732      | 65.6442344     | 2.856E-10 | 1.408693  | up        | Gag-protease-integrase-K1-KINASE1 polyprotein [Glycine max]                                        |
| c50046.graph_c0 | 9.20526874    | 8.54151832    | 8.24052086    | 37.542861      | 48.3523862     | 52.3549286     | 2.738E-13 | 1.389674  | up        | PREDICTED: UMP-CMP kinase 3-like [Sesamum indicum]                                                 |
| c50048.graph_c0 | 0             | 0             | 0             | 1.47174932     | 4.44813457     | 0.63551871     | 0.0019987 | Inf       | up        | --                                                                                                 |

| #ID             | 0 h-1<br>FPKM | 0 h-2<br>FPKM | 0 h-3<br>FPKM | 48 h-1<br>FPKM | 48 h-2<br>FPKM | 48 h-3<br>FPKM | FDR       | log2FC    | regulated | nr_annotation                                                                                                      |
|-----------------|---------------|---------------|---------------|----------------|----------------|----------------|-----------|-----------|-----------|--------------------------------------------------------------------------------------------------------------------|
| c50050.graph_c0 | 3.75610476    | 4.73464599    | 4.24574644    | 33.1939071     | 37.167555      | 39.3429727     | 9.27E-33  | 2.086229  | up        | hypothetical protein MIMGU_mgv1a001814mg [Erythranthe guttata]                                                     |
| c50051.graph_c0 | 0             | 0             | 0             | 13.6045339     | 20.1256179     | 10.803076      | 4.949E-23 | Inf       | up        | hypothetical protein GUITHDRAFT_64866 [Guillardia theta CCMP2712]                                                  |
| c50052.graph_c4 | 1.27677951    | 1.38112721    | 0.89974541    | 9.78945685     | 9.2653339      | 10.5506296     | 3.556E-17 | 2.043292  | up        | hypothetical protein MIMGU_mgv1a002839mg [Erythranthe guttata]                                                     |
| c50053.graph_c0 | 0             | 0             | 0             | 2.27472392     | 4.60538442     | 0.98952855     | 0.0003978 | Inf       | up        | --                                                                                                                 |
| c50054.graph_c0 | 0             | 0             | 0             | 4.7547236      | 14.533997      | 7.22748762     | 1.78E-07  | Inf       | up        | PREDICTED: nucleolar and coiled-body phosphoprotein 1-like [Tarenaya hassleriana]                                  |
| c50055.graph_c0 | 0             | 0             | 0             | 5.46119547     | 7.30071769     | 10.0657734     | 1.983E-12 | Inf       | up        | -                                                                                                                  |
| c50055.graph_c1 | 0             | 0             | 0             | 3.26767727     | 5.06339355     | 5.46794787     | 6.651E-25 | Inf       | up        | -                                                                                                                  |
| c50057.graph_c0 | 4.76717722    | 4.65190174    | 5.50955748    | 2.59643051     | 2.13610681     | 2.26113319     | 4.319E-14 | -2.109683 | down      | PREDICTED: transcription factor bHLH79-like [Sesamum indicum]                                                      |
| c50057.graph_c3 | 372.787274    | 393.753475    | 357.477558    | 374.636858     | 340.000167     | 278.843669     | 2.222E-11 | -1.191393 | down      | hypothetical protein MIMGU_mgv1a006830mg [Erythranthe guttata]                                                     |
| c50058.graph_c0 | 0             | 0             | 0             | 8.58655982     | 19.3636641     | 11.0191343     | 2.14E-14  | Inf       | up        | -                                                                                                                  |
| c50061.graph_c0 | 13.5722587    | 14.8570398    | 13.3611495    | 115.603921     | 136.334139     | 115.355657     | 7.312E-40 | 2.116842  | up        | -                                                                                                                  |
| c50062.graph_c0 | 0             | 0             | 0             | 0.80675508     | 1.5872242      | 1.02549403     | 3.485E-08 | Inf       | up        | bifunctional aminoacyl-tRNA synthetase [Zea mays]                                                                  |
| c50064.graph_c0 | 0             | 0             | 0             | 2.79729328     | 5.043467       | 2.44114907     | 7.38E-11  | Inf       | up        | hypothetical protein VOLCADRAFT_93958 [Volvox carteri f. nagariensis]                                              |
| c50066.graph_c0 | 29.1815625    | 31.9101297    | 28.5268193    | 12.9983497     | 12.3602598     | 14.4474483     | 3.964E-40 | -2.187916 | down      | PREDICTED: flowering time control protein FPA [Vitis vinifera]                                                     |
| c50067.graph_c0 | 1.6672662     | 1.68614124    | 1.63448688    | 1.61516934     | 1.3587957      | 1.80350489     | 0.0008947 | -1.078382 | down      | PREDICTED: uncharacterized protein LOC105173219 [Sesamum indicum]                                                  |
| c50070.graph_c1 | 0             | 0             | 0             | 4.54800153     | 9.7059392      | 3.61669138     | 8.601E-09 | Inf       | up        | probable SEC14-phosphatidylinositol(PI)/phosphatidylcholine(PC) transfer protein [Piriformospora indica DSM 11827] |
| c50071.graph_c0 | 28.4115149    | 27.669285     | 27.0506425    | 15.5351868     | 17.9238067     | 18.702768      | 2.658E-32 | -1.692399 | down      | PREDICTED: uncharacterized protein LOC105171564 [Sesamum indicum]                                                  |
| c50072.graph_c0 | 0             | 0             | 0             | 2.36299911     | 3.87707928     | 1.69232242     | 2.618E-09 | Inf       | up        | hypothetical protein GUITHDRAFT_109518 [Guillardia theta CCMP2712]                                                 |
| c50073.graph_c0 | 0             | 0             | 0             | 3.27833668     | 9.63477474     | 2.00742831     | 0.0002896 | Inf       | up        | -                                                                                                                  |
| c50075.graph_c0 | 20.6042023    | 21.2753393    | 23.136862     | 10.917254      | 9.81202673     | 9.27540532     | 1.834E-36 | -2.131628 | down      | PREDICTED: uncharacterized protein LOC104218703 [Nicotiana glauca]                                                 |
| c50076.graph_c0 | 0.16047045    | 0             | 0             | 20.2535114     | 31.6360597     | 28.8080156     | 9.366E-37 | 7.970553  | up        | PREDICTED: peroxidase 73 [Sesamum indicum]                                                                         |
| c50077.graph_c0 | 0             | 0             | 0             | 3.86201191     | 8.15901733     | 3.89325674     | 5.973E-11 | Inf       | up        | hypothetical protein VOLCADRAFT_120457 [Volvox carteri f. nagariensis]                                             |

| #ID             | 0 h-1<br>FPKM | 0 h-2<br>FPKM | 0 h-3<br>FPKM | 48 h-1<br>FPKM | 48 h-2<br>FPKM | 48 h-3<br>FPKM | FDR       | log2FC    | regulated | nr_annotation                                                                                        |
|-----------------|---------------|---------------|---------------|----------------|----------------|----------------|-----------|-----------|-----------|------------------------------------------------------------------------------------------------------|
| c50078.graph_c0 | 0             | 0             | 0             | 0.80566524     | 1.09058925     | 0.65713641     | 1.151E-11 | Inf       | up        | predicted protein [Hordeum vulgare subsp. vulgare]                                                   |
| c50080.graph_c0 | 0             | 0             | 0             | 23.4953314     | 36.9585538     | 28.508188      | 1.459E-41 | Inf       | up        | carbonyl reductase (NADPH) [Galdieria sulphuraria]                                                   |
| c50081.graph_c0 | 0             | 0             | 0             | 0.99045934     | 1.18785461     | 0.4157098      | 2.528E-06 | Inf       | up        | RHTO0S07e00188g1_1 [Rhodosporidium toruloides]                                                       |
| c50082.graph_c0 | 0             | 0             | 0             | 8.12805299     | 6.87699128     | 7.32937042     | 3.367E-22 | Inf       | up        | YALI0E30965p [Yarrowia lipolytica]                                                                   |
| c50083.graph_c0 | 0             | 0             | 0             | 4.79755908     | 10.0841907     | 3.65900504     | 2.451E-06 | Inf       | up        | -                                                                                                    |
| c50084.graph_c0 | 0             | 0             | 0             | 0.9848432      | 3.49819714     | 2.37118516     | 2.436E-06 | Inf       | up        | hypothetical protein PLEOSDRAFT_1111887 [Pleurotus ostreatus PC15]                                   |
| c50085.graph_c0 | 5.84936635    | 5.74262315    | 6.33134672    | 37.7217246     | 66.1342411     | 91.6386358     | 0.000151  | 2.417309  | up        | PREDICTED: subtilisin-like protease [Sesamum indicum]                                                |
| c50086.graph_c0 | 7.44825842    | 7.39226382    | 7.45340074    | 4.58428073     | 4.54715901     | 5.04037384     | 1.365E-13 | -1.671735 | down      | hypothetical protein VITISV_036599 [Vitis vinifera]                                                  |
| c50087.graph_c0 | 0             | 0             | 0             | 3.51990496     | 4.21397428     | 2.41901687     | 2.745E-17 | Inf       | up        | PREDICTED: mitochondrial-processing peptidase subunit alpha-like [Musa acuminata subsp. malaccensis] |
| c50088.graph_c0 | 0             | 0             | 0             | 1.50326232     | 1.33974254     | 0.87049754     | 1.401E-11 | Inf       | up        | unknown [Picea sitchensis]                                                                           |
| c50091.graph_c0 | 0             | 0             | 0             | 9.48820311     | 7.15328638     | 7.43254822     | 2.187E-34 | Inf       | up        | -                                                                                                    |
| c50092.graph_c0 | 28.3427544    | 28.0747716    | 27.4807925    | 13.8371494     | 14.2920346     | 11.5747864     | 2.851E-49 | -2.095546 | down      | PREDICTED: RNA polymerase II C-terminal domain phosphatase-like 2 [Sesamum indicum]                  |
| c50097.graph_c0 | 0             | 0             | 0             | 0.77834934     | 2.73873955     | 0.54416258     | 0.0051172 | Inf       | up        | NADPH-dependent thioredoxin reductase [Euglena gracilis]                                             |
| c50099.graph_c0 | 20.4209386    | 20.644692     | 19.7168759    | 100.410247     | 87.3613056     | 83.9864919     | 1.2E-11   | 1.146685  | up        | hypothetical protein, partial (mitochondrion) [Nicotiana glauca]                                     |
| c50101.graph_c0 | 0             | 0             | 0             | 1.39282176     | 2.16717847     | 1.27805332     | 1.191E-13 | Inf       | up        | predicted protein [Micromonas sp. RCC299]                                                            |
| c50102.graph_c0 | 0             | 0             | 0             | 2.78433342     | 4.37478203     | 3.25691603     | 3.072E-19 | Inf       | up        | protein disulfide isomerase [Rhizoctonia solani 123E]                                                |
| c50103.graph_c0 | 0             | 0.08453615    | 0             | 7.00220797     | 5.52228165     | 8.03045128     | 1.539E-15 | 6.921331  | up        | hypothetical protein MIMGU_mgv1a018847mg, partial [Erythranthe guttata]                              |
| c50104.graph_c0 | 0             | 0             | 0             | 0.89972352     | 1.7275807      | 0.65046197     | 1.686E-05 | Inf       | up        | unknown [Picea sitchensis]                                                                           |
| c50106.graph_c0 | 0             | 0             | 0             | 1.96752909     | 2.55100593     | 1.09745095     | 8.414E-09 | Inf       | up        | saccharopepsin [Mucor circinelloides 1. circinelloides 1006681.1]                                    |
| c50107.graph_c2 | 0             | 0             | 0             | 1.23161585     | 3.13139437     | 0.75146357     | 0.0001563 | Inf       | up        | --                                                                                                   |
| c50108.graph_c1 | 0.46589557    | 0.34977157    | 0.07483678    | 105.479189     | 105.518711     | 94.5708325     | 3.34E-226 | 7.419014  | up        | PREDICTED: cationic amino acid transporter 7, chloroplastic [Sesamum indicum]                        |
| c50108.graph_c2 | 0             | 0             | 0             | 7.56204402     | 10.5288331     | 9.61237328     | 4.049E-12 | Inf       | up        | -                                                                                                    |
| c50109.graph_c0 | 7.02373725    | 5.91373217    | 6.41083471    | 239.416821     | 207.44227      | 174.288837     | 8.027E-29 | 3.991848  | up        | PREDICTED: pentatricopeptide repeat-containing protein At5g66520-like [Sesamum indicum]              |
| c50109.graph_c3 | 57.8991141    | 60.5651605    | 53.8489208    | 287.104921     | 260.218091     | 221.350917     | 3.144E-08 | 1.144086  | up        | PREDICTED: DEAD-box ATP-dependent RNA helicase 7-like [Sesamum indicum]                              |
| c50110.graph_c2 | 1.21730491    | 1.41505996    | 2.06889306    | 14.7960457     | 14.1799708     | 11.716913      | 3.68E-14  | 2.093094  | up        | PREDICTED: uncharacterized protein LOC105163215 [Sesamum indicum]                                    |
| c50110.graph_c3 | 0.24452432    | 0.12238459    | 0             | 4.84334276     | 5.48890653     | 5.81291817     | 1.836E-09 | 4.457419  | up        | PREDICTED: uncharacterized protein LOC101248594 [Solanum lycopersicum]                               |

| #ID             | 0 h-1<br>FPKM | 0 h-2<br>FPKM | 0 h-3<br>FPKM | 48 h-1<br>FPKM | 48 h-2<br>FPKM | 48 h-3<br>FPKM | FDR       | log2FC    | regulated | nr_annotation                                                                                      |
|-----------------|---------------|---------------|---------------|----------------|----------------|----------------|-----------|-----------|-----------|----------------------------------------------------------------------------------------------------|
| c50110.graph_c4 | 0             | 0.1035005     | 0.06643459    | 3.66735694     | 4.54104933     | 4.11077453     | 2.051E-13 | 5.153329  | up        | PREDICTED: uncharacterized protein LOC105159914 [Sesamum indicum]                                  |
| c50111.graph_c0 | 1.153938      | 1.18076224    | 1.31809424    | 1.01583482     | 1.37647581     | 0.86184261     | 0.005272  | -1.188292 | down      | gag-pol polyprotein [Oryza sativa Japonica Group]                                                  |
| c50112.graph_c0 | 0             | 0             | 0             | 1.87730214     | 2.61381723     | 1.64654912     | 1.853E-15 | Inf       | up        | -                                                                                                  |
| c50114.graph_c0 | 0             | 0             | 0             | 2.33843359     | 5.87830776     | 2.39812275     | 2.899E-06 | Inf       | up        | -                                                                                                  |
| c50115.graph_c0 | 0             | 0             | 0             | 2.01697233     | 4.41326179     | 1.27473298     | 5.298E-06 | Inf       | up        | -                                                                                                  |
| c50116.graph_c0 | 0             | 0             | 0             | 16.503738      | 23.0904395     | 16.8026772     | 1.016E-51 | Inf       | up        | hypothetical protein O988_02039 [Pseudogymnoascus pannorum VKM F-3808]                             |
| c50124.graph_c0 | 0             | 0             | 0             | 5.77075139     | 13.3102121     | 5.17811136     | 5.491E-09 | Inf       | up        | Formate/nitrite transporter [Trametes versicolor PR-101004 5511]                                   |
| c50125.graph_c0 | 0             | 0             | 0             | 1.81741856     | 2.75047799     | 1.48511765     | 7.422E-11 | Inf       | up        | PREDICTED: 26S proteasome non-ATPase regulatory subunit 1 homolog A-like [Brachypodium distachyon] |
| c50126.graph_c0 | 8.12288733    | 3.70678907    | 3.12123599    | 0              | 0              | 0              | 1.23E-10  | -Inf      | down      | -                                                                                                  |
| c50128.graph_c0 | 90.1259294    | 87.5077218    | 88.6948628    | 44.521301      | 49.2294854     | 48.2313715     | 3.442E-38 | -1.926617 | down      | PREDICTED: uncharacterized protein LOC105173692 [Sesamum indicum]                                  |
| c50129.graph_c0 | 2.8710987     | 3.75719485    | 3.02357017    | 32.5275824     | 38.8193747     | 40.7564886     | 1.582E-63 | 2.517343  | up        | PREDICTED: geranylgeranyl diphosphate reductase, chloroplastic [Sesamum indicum]                   |
| c50130.graph_c0 | 0             | 0             | 0             | 2.73386915     | 4.63392458     | 3.80367106     | 2.437E-15 | Inf       | up        | --                                                                                                 |
| c50131.graph_c0 | 0             | 0             | 0             | 1.01666657     | 1.3670059      | 1.11338313     | 2.029E-11 | Inf       | up        | hypothetical protein [Tuber melanosporum Mel28]                                                    |
| c50131.graph_c1 | 0             | 0             | 0             | 2.21840922     | 3.67585308     | 2.22699477     | 2.859E-11 | Inf       | up        | hypothetical protein GUTHDRAFT_147173 [Guillardia theta CCMP2712]                                  |
| c50133.graph_c0 | 1.68122665    | 1.87387867    | 1.99189762    | 14.7306059     | 18.4912804     | 18.3559508     | 9.159E-42 | 2.193936  | up        | PREDICTED: purple acid phosphatase z-nke [Sesamum indicum]                                         |
| c50133.graph_c1 | 1.54310524    | 2.08527807    | 2.08209889    | 7.60560919     | 8.81023199     | 11.004972      | 0.0019344 | 1.239757  | up        | PREDICTED: purple acid phosphatase z-nke [Sesamum indicum]                                         |
| c50134.graph_c0 | 0             | 0             | 0             | 1.6363989      | 2.69909676     | 2.10114684     | 2.002E-18 | Inf       | up        | -                                                                                                  |
| c50135.graph_c0 | 0             | 0             | 0             | 2.49029247     | 2.8972682      | 1.18706104     | 1.892E-09 | Inf       | up        | hypothetical protein ZEAMMB73_452342 [Zea mays]                                                    |
| c50137.graph_c1 | 0             | 0             | 0             | 1.08800279     | 2.08566986     | 1.19859795     | 2.302E-07 | Inf       | up        | -                                                                                                  |
| c50139.graph_c0 | 0.33677517    | 0.84278101    | 0.9376671     | 10.9107838     | 12.3255773     | 11.778851      | 9.871E-15 | 3.021823  | up        | PREDICTED: putative glucose-6-phosphate 1-epimerase [Sesamum indicum]                              |
| c50140.graph_c0 | 34.3826433    | 38.7797997    | 32.4725675    | 22.6717327     | 21.3540644     | 20.1370835     | 2.829E-30 | -1.733977 | down      | PREDICTED: uncharacterized protein LOC105161920 [Sesamum indicum]                                  |
| c50140.graph_c1 | 3.71336722    | 5.03605145    | 4.00217488    | 18.1533502     | 24.3752006     | 20.9641969     | 4.317E-07 | 1.294505  | up        | PREDICTED: uncharacterized protein LOC105179028 [Sesamum indicum]                                  |
| c50141.graph_c0 | 4.06501043    | 3.69231417    | 3.43409864    | 2.11520479     | 1.57958244     | 1.45013993     | 8.175E-10 | -2.130492 | down      | hypothetical protein VITISV_003658 [Vitis vinifera]                                                |
| c50143.graph_c0 | 0             | 0             | 0             | 3.76008919     | 12.7036841     | 6.19407502     | 1.597E-06 | Inf       | up        | hypothetical protein CHLNCDKAF1_55880 [Chlorella variabilis]                                       |
| c50144.graph_c0 | 0             | 0             | 0             | 13.1184399     | 24.7207143     | 12.7485346     | 4.282E-14 | Inf       | up        | molecular chaperone DnaK [Galdieria sulphuraria]                                                   |

| #ID             | 0 h-1<br>FPKM | 0 h-2<br>FPKM | 0 h-3<br>FPKM | 48 h-1<br>FPKM | 48 h-2<br>FPKM | 48 h-3<br>FPKM | FDR       | log2FC    | regulated | nr_annotation                                                                       |
|-----------------|---------------|---------------|---------------|----------------|----------------|----------------|-----------|-----------|-----------|-------------------------------------------------------------------------------------|
| c50145.graph_c0 | 3.33884596    | 3.8085413     | 2.39472516    | 17.5973679     | 17.8086797     | 20.622774      | 1.47E-06  | 1.538809  | up        | PREDICTED: E3 ubiquitin-protein ligase MARCH11 isoform X1 [Sesamum indicum]         |
| c50145.graph_c2 | 1.0996607     | 0.51800557    | 0.83123973    | 12.5741002     | 14.0151803     | 15.2182889     | 3.69E-15  | 3.074291  | up        | PREDICTED: subtilisin-like protease [Sesamum indicum]                               |
| c50147.graph_c0 | 0             | 0             | 0             | 2.43693604     | 1.90933662     | 0.47433116     | 0.0001319 | Inf       | up        | predicted protein [Thalassiosira pseudonana CCMP1335]                               |
| c50150.graph_c0 | 0             | 0             | 0             | 1.15834063     | 1.09564415     | 0.78528345     | 3.475E-15 | Inf       | up        | Eukaryotic translation initiation factor 3 subunit, putative [Ricinus communis]     |
| c50151.graph_c0 | 100.433113    | 107.00824     | 95.6950621    | 50.8866165     | 55.1038742     | 53.1292007     | 2.325E-37 | -1.947758 | down      | PREDICTED: ethylene-insensitive protein 2-like [Sesamum indicum]                    |
| c50152.graph_c0 | 0             | 0             | 0             | 0.92476267     | 1.45990622     | 0.66150546     | 2.004E-08 | Inf       | up        | predicted protein [Hordeum vulgare subsp. vulgare]                                  |
| c50153.graph_c1 | 0             | 0             | 0             | 4.22579949     | 6.63368828     | 3.64045171     | 3.098E-18 | Inf       | up        | hypothetical protein EMIHUDDRAFT_422478 [Emiliania huxleyi CCMP1516]                |
| c50154.graph_c0 | 54.7983168    | 55.7814292    | 51.5380863    | 48.8819714     | 38.3505249     | 35.5132998     | 3.906E-24 | -1.412531 | down      | PREDICTED: splicing factor U2AF-associated protein 2 isoform X3 [Sesamum indicum]   |
| c50155.graph_c0 | 13.2604841    | 13.7299055    | 12.2970855    | 13.832685      | 13.6533964     | 11.8413113     | 6.12E-11  | -1.013667 | down      | PREDICTED: nephrocystin-3 [Sesamum indicum]                                         |
| c50156.graph_c0 | 100.412428    | 112.336573    | 104.531815    | 94.1946355     | 95.4134689     | 102.224848     | 7.984E-15 | -1.138806 | down      | PREDICTED: acetolactate synthase 1, chloroplastic [Sesamum indicum]                 |
| c50156.graph_c1 | 29.1555834    | 26.3777558    | 30.6829699    | 6.34458868     | 8.5727046      | 8.11311644     | 3.253E-67 | -2.927967 | down      | hypothetical protein VITISV_035070 [Vitis vinifera]                                 |
| c50157.graph_c0 | 12.3520956    | 12.2686158    | 11.5663224    | 133.202556     | 187.183608     | 158.161264     | 3.358E-30 | 2.703225  | up        | ATP-binding cassette superfamily [Micromonas sp. RCC6001]                           |
| c50158.graph_c0 | 0             | 0             | 0             | 3.2456526      | 3.77512347     | 5.6419467      | 5.576E-21 | Inf       | up        | -                                                                                   |
| c50162.graph_c0 | 3.22506455    | 3.38202225    | 3.4996612     | 2.92397887     | 3.58722187     | 3.31511881     | 1.005E-08 | -1.062008 | down      | PREDICTED: uncharacterized protein LOC105111104, partial [Populus euphratica]       |
| c50163.graph_c0 | 0             | 0             | 0             | 4.47319633     | 10.8056921     | 3.70135405     | 4.05E-07  | Inf       | up        | -                                                                                   |
| c50164.graph_c1 | 0             | 0             | 0             | 3.40336155     | 10.8856822     | 3.90183602     | 6.513E-05 | Inf       | up        | -                                                                                   |
| c50165.graph_c0 | 0             | 0             | 0             | 1.03447844     | 1.33700345     | 0.51546471     | 5.589E-07 | Inf       | up        | predicted protein [Hordeum vulgare subsp. vulgare]                                  |
| c50166.graph_c1 | 2.60198304    | 2.4214534     | 3.39589577    | 1.64801759     | 2.24186196     | 2.68283839     | 1.227E-05 | -1.384806 | down      | PREDICTED: putative late blight resistance protein homolog R1A-10 [Sesamum indicum] |
| c50167.graph_c0 | 0             | 0             | 0             | 2.79657767     | 5.00519692     | 2.07107237     | 3.126E-10 | Inf       | up        | ATP-dependent Clp protease ATP-binding subunit ClpB [Galdieria sulphuraria]         |
| c50170.graph_c0 | 0             | 0             | 0             | 2.14367159     | 2.92530455     | 1.58413353     | 1.75E-15  | Inf       | up        | hypothetical protein CHLNUDDRAFT_55880 [Chlorella variabilis]                       |
| c50173.graph_c0 | 9.96485562    | 8.69094441    | 8.68473791    | 31.2674712     | 41.9347182     | 38.4164643     | 1.421E-08 | 1.008207  | up        | PREDICTED: uncharacterized protein LOC102612426 [Citrus sinensis]                   |
| c50176.graph_c1 | 0             | 0             | 0             | 0.87539817     | 1.61836589     | 0.47346362     | 2.775E-05 | Inf       | up        | predicted protein [Hordeum vulgare subsp. vulgare]                                  |
| c50178.graph_c0 | 39.384112     | 41.0047076    | 36.5367343    | 20.0576317     | 22.8930207     | 24.1702772     | 3.666E-37 | -1.820114 | down      | PREDICTED: DDB1- and CUL4-associated factor homolog 1 [Sesamum indicum]             |
| c50179.graph_c0 | 0             | 0             | 0             | 16.8948107     | 31.8331432     | 14.4078324     | 9.82E-17  | Inf       | up        | EF2, translation elongation factor 2 [Ectocarpus siliculosus]                       |
| c50180.graph_c0 | 0             | 0             | 0             | 5.17444152     | 4.28183773     | 3.7841279      | 1.073E-39 | Inf       | up        | myosin tail domain-containing protein [kozeia anomycis CCS51]                       |

| #ID             | 0 h-1<br>FPKM | 0 h-2<br>FPKM | 0 h-3<br>FPKM | 48 h-1<br>FPKM | 48 h-2<br>FPKM | 48 h-3<br>FPKM | FDR       | log2FC    | regulated | nr_annotation                                                                                     |
|-----------------|---------------|---------------|---------------|----------------|----------------|----------------|-----------|-----------|-----------|---------------------------------------------------------------------------------------------------|
| c50181.graph_c0 | 0             | 0             | 0             | 2.92756165     | 2.43896236     | 2.02324408     | 8.524E-30 | Inf       | up        | --                                                                                                |
| c50182.graph_c0 | 1.29921872    | 1.3005197     | 1.14394921    | 9.64189608     | 11.4354538     | 11.8729639     | 1.484E-17 | 2.11823   | up        | PREDICTED: putative late blight resistance protein homolog R1A-10 [Sesamum indicum]               |
| c50183.graph_c0 | 270.542582    | 300.15235     | 362.054404    | 395.434034     | 214.224733     | 265.605554     | 0.0005548 | -1.101384 | down      | Cell wall-associated hydrolase, partial [Medicago truncatula]                                     |
| c50187.graph_c1 | 0             | 0             | 0             | 5.98631083     | 8.81660769     | 3.46444447     | 1.377E-09 | Inf       | up        | hypothetical protein GUITHDRAFT_163621 [Guillardia theta CCMP2712]                                |
| c50188.graph_c0 | 16.4507368    | 15.6830569    | 13.5899024    | 5.41267563     | 12.0415544     | 8.50856033     | 7.64E-07  | -1.843795 | down      | PREDICTED: putative ribonuclease H protein At1g65750 [Malus domestica]                            |
| c50188.graph_c1 | 7.27170714    | 7.16381479    | 6.41690396    | 3.47678491     | 3.54847964     | 3.0558952      | 1.212E-23 | -2.063959 | down      | PREDICTED: uncharacterized protein LOC105167219 [Sesamum indicum]                                 |
| c50189.graph_c0 | 13.9401126    | 11.8138765    | 13.4077226    | 50.3853066     | 53.8779246     | 56.6803923     | 3.744E-11 | 1.01977   | up        | PREDICTED: probable LRR receptor-like serine/threonine-protein kinase At2g16250 [Sesamum indicum] |
| c50190.graph_c1 | 21.3741212    | 16.7208718    | 14.3103252    | 1.15830791     | 0.35059622     | 0.14723649     | 2.127E-34 | -5.966924 | down      | -                                                                                                 |
| c50191.graph_c0 | 8.19328842    | 8.51999734    | 8.89317379    | 0.76947585     | 0.4269919      | 0.32603571     | 9.351E-58 | -5.075587 | down      | PREDICTED: uncharacterized protein LOC105157045 [Sesamum indicum]                                 |
| c50194.graph_c0 | 7.04809722    | 6.26054694    | 5.90410594    | 26.9699116     | 30.2147319     | 24.7075385     | 2.871E-11 | 1.074983  | up        | hypothetical protein M569_07983, partial [Genlisea aurea]                                         |
| c50195.graph_c0 | 37.0903537    | 42.949412     | 34.4193271    | 18.2835635     | 16.780017      | 18.1923987     | 2.056E-39 | -2.118843 | down      | hypothetical protein VITISV_039063 [Vitis vinifera]                                               |
| c50196.graph_c1 | 4.8048227     | 4.55732533    | 4.73707099    | 2.27856729     | 1.06087093     | 0.86521985     | 3.685E-36 | -2.745184 | down      | hypothetical protein VITISV_021503 [Vitis vinifera]                                               |
| c50197.graph_c0 | 6.71677483    | 6.65212592    | 5.845842      | 2.87062195     | 2.85318332     | 3.03939661     | 3.047E-45 | -2.149028 | down      | PREDICTED: uncharacterized protein LOC103415359 [Malus domestica]                                 |
| c50198.graph_c0 | 7.81267953    | 8.4845077     | 6.91406588    | 2.68210588     | 7.44509816     | 9.57629589     | 5.973E-05 | -1.268865 | down      | PREDICTED: uncharacterized protein LOC105162629 [Sesamum indicum]                                 |
| c50199.graph_c0 | 257.142571    | 245.816206    | 258.271166    | 3.9195319      | 1.82699826     | 1.67403644     | 0         | -7.681498 | down      | defensin-like protein 4 [Arabidopsis thaliana]                                                    |
| c50200.graph_c0 | 82.1260941    | 77.9300751    | 81.453973     | 48.2188086     | 55.4457682     | 48.4565585     | 2.606E-31 | -1.686085 | down      | PREDICTED: uncharacterized protein LOC105159431 [Sesamum indicum]                                 |
| c50201.graph_c0 | 2.22889401    | 3.68620803    | 2.11702999    | 0.44639186     | 1.0403757      | 1.19159037     | 2.581E-06 | -2.61357  | down      | -                                                                                                 |
| c50202.graph_c0 | 44.0154056    | 40.8946444    | 41.9431692    | 19.2183503     | 18.1813768     | 16.1856424     | 4.079E-54 | -2.258421 | down      | PREDICTED: squalene monooxygenase-like [Sesamum indicum]                                          |
| c50203.graph_c0 | 12.0397471    | 13.9189839    | 11.5491865    | 7.73301574     | 8.10944309     | 8.96587906     | 6.136E-09 | -1.614459 | down      | -                                                                                                 |
| c50205.graph_c0 | 0.23394311    | 0.15611825    | 0             | 1.652348       | 1.52214118     | 1.47024932     | 1.471E-05 | 2.575753  | up        | PREDICTED: protein FLX-like 4 [Sesamum indicum]                                                   |
| c50207.graph_c0 | 1.39650603    | 1.56565294    | 1.07673932    | 6.2783759      | 10.3038741     | 11.9055729     | 4.316E-05 | 1.794419  | up        | hypothetical protein MIMGU_mgv1a010254mg [Erythranthe guttata]                                    |
| c50212.graph_c0 | 10560.0812    | 9984.95233    | 10690.9067    | 1696.63794     | 1475.10397     | 1677.2971      | 5.626E-41 | -3.703514 | down      | hypothetical protein MIMGU_mgv1a016953mg [Erythranthe guttata]                                    |
| c50213.graph_c0 | 0.60983977    | 0.61045044    | 0.65305688    | 6.74189013     | 6.94382023     | 5.41566756     | 1.366E-05 | 2.333067  | up        | PREDICTED: LOW QUALITY PROTEIN: uncharacterized protein LOC105161466 [Sesamum indicum]            |
| c50216.graph_c0 | 239.587447    | 251.5836      | 226.064149    | 45.8986605     | 39.9368873     | 34.9625843     | 6E-126    | -3.582622 | down      | -                                                                                                 |

| #ID             | 0 h-1<br>FPKM | 0 h-2<br>FPKM | 0 h-3<br>FPKM | 48 h-1<br>FPKM | 48 h-2<br>FPKM | 48 h-3<br>FPKM | FDR       | log2FC    | regulated | nr_annotation                                                                                      |
|-----------------|---------------|---------------|---------------|----------------|----------------|----------------|-----------|-----------|-----------|----------------------------------------------------------------------------------------------------|
| c50218.graph_c0 | 2.02802411    | 1.47640354    | 1.97431157    | 0              | 0              | 0.10075424     | 9.872E-19 | -6.806669 | down      | hypothetical protein VITISV_044399 [Vitis vinifera]                                                |
| c50219.graph_c0 | 40.1403106    | 34.9634463    | 33.7221001    | 368.113991     | 345.085184     | 344.260186     | 4.799E-56 | 2.265761  | up        | 60S ribosomal L34-1 -like protein [Gossypium arboreum]                                             |
| c50224.graph_c0 | 12.64576      | 6.25386368    | 7.83496719    | 0              | 0              | 0              | 5.166E-25 | -Inf      | down      | predicted protein [Hordeum vulgare subsp. vulgare]                                                 |
| c50226.graph_c0 | 6.30600278    | 6.20441443    | 6.71825584    | 39.4251611     | 31.1931276     | 35.1686347     | 8.006E-12 | 1.445302  | up        | histone H4 [Zea mays]                                                                              |
| c50229.graph_c0 | 0             | 0             | 0             | 8.76079712     | 11.2012096     | 15.8594128     | 5.766E-14 | Inf       | up        | PREDICTED: homeobox-leucine zipper protein ATHB-13 [Sesamum indicum]                               |
| c50230.graph_c0 | 1.34178033    | 0.61990335    | 0.99475433    | 104.073105     | 69.1031933     | 59.7333558     | 1.527E-13 | 5.293003  | up        | PREDICTED: zinc finger protein CONSTANS-LIKE 4-like [Sesamum indicum]                              |
| c50231.graph_c0 | 29.052712     | 14.837655     | 21.6193672    | 0              | 0              | 0              | 8.893E-28 | -Inf      | down      | predicted protein [Physcomitrella patens]                                                          |
| c50232.graph_c0 | 0             | 0             | 0             | 2.39944935     | 3.03925892     | 2.73838958     | 5.257E-13 | Inf       | up        | PREDICTED: putative late blight resistance protein homolog R1A-4 [Sesamum indicum]                 |
| c50235.graph_c0 | 0             | 0             | 0             | 4.49774139     | 6.40785012     | 6.90010905     | 1.497E-15 | Inf       | up        | PREDICTED: dirigent protein 22-like [Sesamum indicum]                                              |
| c50236.graph_c0 | 14.0486943    | 16.3309493    | 8.73538468    | 5.74065759     | 6.85554362     | 6.593967       | 2.319E-06 | -2.042693 | down      | -                                                                                                  |
| c50238.graph_c0 | 30.0943133    | 26.2713211    | 20.2355498    | 2.9014372      | 3.41524544     | 5.16336274     | 2.547E-17 | -3.758171 | down      | -                                                                                                  |
| c50239.graph_c0 | 7223.6407     | 7097.40063    | 7562.77428    | 691.994445     | 602.476798     | 613.486984     | 4.081E-85 | -4.535157 | down      | hypothetical protein MIMGU_mgv1a015957mg [Erythranthe guttata]                                     |
| c50240.graph_c0 | 1.71133495    | 2.29799201    | 1.39457225    | 1298.92067     | 1529.58602     | 1927.09611     | 7.666E-89 | 8.762411  | up        | hypothetical protein MIMGU_mgv1a027056mg [Erythranthe guttata]                                     |
| c50245.graph_c0 | 0.20082858    | 0.10051484    | 0             | 9.99088466     | 10.2901272     | 7.07893798     | 1.12E-14  | 5.507287  | up        | PREDICTED: protein RALF-like 24 [Sesamum indicum]                                                  |
| c50246.graph_c0 | 2.70553448    | 1.35412183    | 0.86917973    | 11.2163167     | 14.962931      | 26.7987152     | 0.002798  | 2.408366  | up        | -                                                                                                  |
| c50247.graph_c0 | 9.55358467    | 4.91080734    | 6.4701709     | 0              | 0              | 0              | 6.895E-18 | -Inf      | down      | 40S ribosomal protein S11 [Lachancea thermotolerans]                                               |
| c50248.graph_c0 | 40.850923     | 46.8697947    | 42.7797947    | 12.232687      | 16.2453145     | 15.2071523     | 1.108E-55 | -2.601003 | down      | PREDICTED: uncharacterized protein LOC105176358 [Sesamum indicum]                                  |
| c50251.graph_c0 | 25.3623616    | 20.8886618    | 18.5648575    | 0.88729602     | 3.44660264     | 6.84242571     | 3.653E-15 | -3.571227 | down      | PREDICTED: trihelix transcription factor ASIL2 [Sesamum indicum]                                   |
| c50253.graph_c0 | 24.9242288    | 19.3233897    | 35.7966938    | 6.07813022     | 5.00814374     | 6.81043135     | 3.532E-07 | -3.182644 | down      | conserved hypothetical protein [Ricinus communis]                                                  |
| c50255.graph_c0 | 3759.77414    | 3929.75954    | 3850.37212    | 187.374158     | 145.373082     | 119.035213     | 1.6E-150  | -5.685606 | down      | oleosin, partial [Genlisea aurea]                                                                  |
| c50256.graph_c0 | 0.03788731    | 0.22755147    | 0.09737338    | 10.8203202     | 12.0174697     | 11.3360238     | 1.362E-35 | 5.539246  | up        | PREDICTED: probable indole-3-pyruvate monooxygenase YUCCA5 [Sesamum indicum]                       |
| c50257.graph_c0 | 1.14820929    | 0.61059699    | 0.5533104     | 121.052593     | 134.298876     | 143.155015     | 3.49E-235 | 6.415119  | up        | PREDICTED: 5-methyltetrahydropteroyltriglutamate--homocysteine methyltransferase [Sesamum indicum] |
| c50258.graph_c0 | 6.10865909    | 4.4162271     | 5.88740159    | 0              | 0              | 0              | 6.508E-22 | -Inf      | down      | RecName: Full=60S ribosomal protein L31 [Cyanophora paradoxa]                                      |
| c50261.graph_c0 | 2.09356461    | 2.10918139    | 2.11753701    | 24.3268631     | 18.8638458     | 19.2875456     | 3.821E-15 | 2.292707  | up        | PREDICTED: U-box domain-containing protein 30-like [Sesamum indicum]                               |
| c50265.graph_c0 | 0             | 0             | 0.40805738    | 11.1166261     | 40.28877       | 35.4011831     | 3.156E-06 | 6.664676  | up        | -                                                                                                  |

| #ID             | 0 h-1<br>FPKM | 0 h-2<br>FPKM | 0 h-3<br>FPKM | 48 h-1<br>FPKM | 48 h-2<br>FPKM | 48 h-3<br>FPKM | FDR       | log2FC    | regulated | nr_annotation                                                                      |
|-----------------|---------------|---------------|---------------|----------------|----------------|----------------|-----------|-----------|-----------|------------------------------------------------------------------------------------|
| c50266.graph_c0 | 1.49107896    | 1.21616982    | 0.7806315     | 1.27192518     | 1.0779604      | 0.63378077     | 0.0082485 | -1.229672 | down      | -                                                                                  |
| c50267.graph_c0 | 8.13674358    | 9.44533612    | 7.7321959     | 1.38583341     | 1.00099258     | 1.62545822     | 4.185E-24 | -3.671784 | down      | hypothetical protein MIMGU_mgv1a021404mg, partial [Erythranthe guttata]            |
| c50270.graph_c0 | 0             | 0             | 0             | 1.00846066     | 1.16546377     | 0.9381096      | 2.211E-10 | Inf       | up        | hypothetical protein MIMGU_mgv1a025449mg [Erythranthe guttata]                     |
| c50271.graph_c0 | 0.06204401    | 0.12421227    | 0             | 18.0622404     | 25.9772445     | 18.6655188     | 2.397E-36 | 7.387983  | up        | PREDICTED: uncharacterized protein LOC105180227 [Sesamum indicum]                  |
| c50272.graph_c0 | 77.9722749    | 90.1034846    | 87.7539312    | 7.9125063      | 9.12195931     | 9.07672372     | 1.8E-141  | -4.313217 | down      | hypothetical protein MIMGU_mgv1a027115mg, partial [Erythranthe guttata]            |
| c50273.graph_c0 | 0.28382527    | 0.21308211    | 0.18236335    | 5.03345822     | 5.5400921      | 5.46755378     | 1.715E-09 | 3.546186  | up        | -                                                                                  |
| c50276.graph_c0 | 0.73507531    | 0.55185853    | 0.59037555    | 10.8351891     | 14.1240205     | 14.4616292     | 6.418E-40 | 3.371134  | up        | PREDICTED: glycerophosphodiester phosphodiesterase GDPDL3-like [Sesamum indicum]   |
| c50282.graph_c0 | 32.6504941    | 27.5795075    | 33.8933357    | 1.8969221      | 1.1483194      | 1.20562134     | 9.653E-90 | -5.477295 | down      | hypothetical protein MIMGU_mgv1a026849mg [Erythranthe guttata]                     |
| c50283.graph_c0 | 42.5126105    | 44.5375646    | 34.2712369    | 30.5295429     | 25.3842339     | 29.1130916     | 2.918E-15 | -1.525333 | down      | hyponeucal protein RNAVU_000505 / 000g [Pnaseoius vulgariel                        |
| c50286.graph_c0 | 13.480203     | 7.25231509    | 8.46380843    | 0              | 0              | 0              | 3.212E-25 | -Inf      | down      | predicted protein [Physcomitrella patens]                                          |
| c50290.graph_c0 | 0.43567418    | 0.2907403     | 0.09330976    | 329.258398     | 436.188854     | 389.96485      | 9.67E-209 | 9.450791  | up        | PREDICTED: GDSL esterase/lipase At5g03810-like [Sesamum indicum]                   |
| c50293.graph_c0 | 0.07798104    | 0             | 0.10020872    | 2.94548992     | 2.13099765     | 2.94049864     | 2.608E-09 | 4.468559  | up        | PREDICTED: protein PROTON GRADIENT REGULATION 5, chloroplastic [Sesamum indicum]   |
| c50294.graph_c0 | 7.15865176    | 7.06536465    | 7.99552371    | 5.11576079     | 5.58276705     | 7.15701809     | 4.917E-09 | -1.337734 | down      | PREDICTED: mitoferrin-like [Sesamum indicum]                                       |
| c50295.graph_c0 | 15.2189258    | 16.8118134    | 18.0379379    | 142.157767     | 121.421278     | 96.2511473     | 2.353E-08 | 1.831422  | up        | PREDICTED: transcription factor MYB1R1-like [Sesamum indicum]                      |
| c50297.graph_c0 | 2217.19253    | 2063.96425    | 2415.48696    | 73.0238815     | 86.4028241     | 84.3286129     | 5.29E-168 | -5.801584 | down      | PREDICTED: uncharacterized protein LOC100246645 [Vitis vinifera]                   |
| c50300.graph_c0 | 196.129956    | 231.129658    | 194.181325    | 111.697856     | 160.52902      | 183.612171     | 3.847E-18 | -1.471181 | down      | putative heat shock protein 90, partial [Limonium albiiflorum]                     |
| c50301.graph_c0 | 121.356152    | 122.957718    | 118.531762    | 60.144227      | 78.9228774     | 78.6889895     | 8.894E-33 | -1.758753 | down      | -                                                                                  |
| c50305.graph_c0 | 0.54546873    | 0.39434412    | 0.27259125    | 2.48468902     | 3.90397672     | 4.84402205     | 1.619E-05 | 2.190955  | up        | PREDICTED: DELLA protein GAI1 [Sesamum indicum]                                    |
| c50306.graph_c0 | 0             | 0             | 0             | 4.45165457     | 4.9255877      | 6.89517062     | 1.328E-24 | Inf       | up        | PREDICTED: microtubule-associated protein RP/EB family member 1C [Sesamum indicum] |
| c50309.graph_c0 | 39.9011934    | 43.4474324    | 39.2387785    | 10.8735404     | 14.0459894     | 18.5389525     | 1.239E-46 | -2.519672 | down      | PREDICTED: uncharacterized protein LOC105167450 [Sesamum indicum]                  |
| c50310.graph_c0 | 18.7132801    | 16.7008359    | 14.4863288    | 194.000737     | 205.080171     | 189.624012     | 8.579E-39 | 2.544832  | up        | PREDICTED: 60S ribosomal protein L15 [Solanum lycopersicum]                        |
| c50311.graph_c0 | 174.21718     | 181.944648    | 187.984746    | 18.9979863     | 22.6707375     | 26.7165566     | 3.89E-147 | -4.014826 | down      | PREDICTED: vegetative incompatibility protein HET-E-1-like [Sesamum indicum]       |



| #ID             | 0 h-1<br>FPKM | 0 h-2<br>FPKM | 0 h-3<br>FPKM | 48 h-1<br>FPKM | 48 h-2<br>FPKM | 48 h-3<br>FPKM | FDR       | log2FC    | regulated | nr_annotation                                                                                                       |
|-----------------|---------------|---------------|---------------|----------------|----------------|----------------|-----------|-----------|-----------|---------------------------------------------------------------------------------------------------------------------|
| c50312.graph_c0 | 0.39633928    | 0.11335319    | 0.07275881    | 9.85860712     | 9.55985078     | 12.3923732     | 3.574E-21 | 4.764913  | up        | -                                                                                                                   |
| c50313.graph_c0 | 0.70889398    | 1.48371711    | 0.41407129    | 6.64953547     | 9.18284798     | 8.55810805     | 8.963E-07 | 2.210348  | up        | unnamed protein product [Coffea canephora]                                                                          |
| c50314.graph_c0 | 0.29084377    | 0.43670252    | 0.24916384    | 6.83257852     | 8.61025162     | 9.29819232     | 2.321E-15 | 3.643721  | up        | PREDICTED: syntaxin-112-like [Sesamum indicum]                                                                      |
| c50316.graph_c0 | 13.0823184    | 12.2296055    | 11.2885776    | 2.16642312     | 3.56130405     | 5.11829692     | 2.527E-49 | -2.781644 | down      | PREDICTED: scarecrow-like protein 8 [Sesamum indicum]                                                               |
| c50321.graph_c0 | 5.17771059    | 6.27403113    | 7.28390065    | 3.91645776     | 5.5852086      | 6.79097136     | 9.793E-05 | -1.229687 | down      | hypothetical protein MIMGU_mgv1a011362mg [Erythranthe guttata]                                                      |
| c50322.graph_c0 | 4.884407      | 3.13653079    | 2.96068697    | 16.9805069     | 18.1686759     | 18.5087123     | 0.0002101 | 1.273745  | up        | PREDICTED: 40S ribosomal protein S17-like [Sesamum indicum]                                                         |
| c50323.graph_c0 | 16.9367803    | 13.488742     | 20.6523819    | 137.126519     | 145.389575     | 146.640172     | 2.581E-34 | 2.04896   | up        | hypothetical protein MIMGU_mgv1a017626mg [Erythranthe guttata]                                                      |
| c50326.graph_c0 | 0.83072792    | 0.76996274    | 0.86982969    | 3.93998455     | 4.47421904     | 5.06950134     | 0.0001807 | 1.426773  | up        | PREDICTED: poly(A) RNA polymerase cid11 isoform X1 [Sesamum indicum]                                                |
| c50328.graph_c0 | 1.29036242    | 0.86893122    | 0.81400915    | 5.53316548     | 5.40377119     | 5.59649538     | 4.769E-06 | 1.461627  | up        | PREDICTED: uncharacterized protein LOC105167120 isoform X1 [Sesamum indicum]                                        |
| c50329.graph_c0 | 0.74499951    | 0.60764449    | 1.02826897    | 0.35588111     | 0.72709627     | 0.70117764     | 0.0042771 | -1.450076 | down      | PREDICTED: pentatricopeptide repeat-containing protein At2g17525, mitochondrial [Sesamum indicum]                   |
| c50330.graph_c0 | 0.2403748     | 0.7218465     | 0.51481856    | 9.89138625     | 13.3721034     | 14.1871637     | 1.203E-14 | 3.638572  | up        | hypothetical protein MIMGU_mgv1a027157mg [Erythranthe guttata]                                                      |
| c50331.graph_c0 | 26.9534761    | 26.160114     | 26.5622853    | 7.38227846     | 5.08785231     | 5.61699091     | 2.672E-92 | -3.149861 | down      | PREDICTED: UPF0392 protein RCOM_0530710-like [Sesamum indicum]                                                      |
| c50341.graph_c0 | 9.9267909     | 10.2727558    | 7.82634084    | 1.14867337     | 1.40409249     | 1.76898922     | 8.166E-37 | -3.717297 | down      | PREDICTED: U-box domain-containing protein 8 [Sesamum indicum]                                                      |
| c50344.graph_c0 | 4.62674263    | 5.47937397    | 5.86180736    | 1.80103821     | 1.27198773     | 0.96153178     | 1.379E-13 | -2.994628 | down      | -                                                                                                                   |
| c50349.graph_c0 | 0.8258109     | 0.68886485    | 1.0611997     | 23.7113151     | 28.6117811     | 33.057585      | 5.883E-20 | 4.025189  | up        | PREDICTED: RNA-binding protein 38-like isoform X1 [Nelumbo nucifera]                                                |
| c50350.graph_c0 | 0             | 0.19286941    | 0.49519378    | 6.2127146      | 7.89794135     | 4.42242887     | 5.953E-08 | 3.71288   | up        | -                                                                                                                   |
| c50353.graph_c0 | 0             | 0             | 0             | 8.94656894     | 19.3115838     | 18.4999935     | 1.516E-17 | Inf       | up        | hypothetical protein MIMGU_mgv1a009974mg [Erythranthe guttata]                                                      |
| c50364.graph_c0 | 0             | 0             | 0             | 6.39852097     | 9.89288334     | 8.46311085     | 1.458E-12 | Inf       | up        | -                                                                                                                   |
| c50366.graph_c0 | 0.04692523    | 0.25051849    | 0.10050129    | 4.38069892     | 4.64081931     | 4.68006788     | 1.278E-26 | 4.088588  | up        | PREDICTED: BTB/POZ domain-containing protein At1g67900 [Sesamum indicum]                                            |
| c50372.graph_c0 | 0             | 0             | 0             | 4.32127501     | 4.68350997     | 4.1999717      | 1.072E-21 | Inf       | up        | PREDICTED: cytochrome P450 CYP82D47-like [Sesamum indicum]                                                          |
| c50373.graph_c0 | 0.3941234     | 0.07890361    | 0.20258567    | 9.14992294     | 13.0012423     | 13.9569367     | 2.153E-18 | 4.719596  | up        | PREDICTED: auxin-induced in root cultures protein 12-like [Sesamum indicum]                                         |
| c50374.graph_c0 | 1.17101687    | 0.67338544    | 0.92849549    | 27.4524526     | 31.2223975     | 27.2863782     | 6.025E-84 | 3.936097  | up        | PREDICTED: succinate dehydrogenase [ubiquinone] flavoprotein subunit 1, mitochondrial isoform X1 [Nicotiana glauca] |

| #ID             | 0 h-1<br>FPKM | 0 h-2<br>FPKM | 0 h-3<br>FPKM | 48 h-1<br>FPKM | 48 h-2<br>FPKM | 48 h-3<br>FPKM | FDR       | log2FC    | regulated | nr_annotation                                                                                    |
|-----------------|---------------|---------------|---------------|----------------|----------------|----------------|-----------|-----------|-----------|--------------------------------------------------------------------------------------------------|
| c50376.graph_c0 | 5.09929737    | 4.92838963    | 6.02556231    | 1.78192616     | 1.02967347     | 1.00898457     | 4.615E-15 | -3.078888 | down      | -                                                                                                |
| c50378.graph_c0 | 86.0655746    | 82.3279082    | 82.0315344    | 59.7849206     | 62.7958539     | 62.8923193     | 8.1E-25   | -1.451185 | down      | hypothetical protein MIMGU_mgv1a003144mg [Erythranthe guttata]                                   |
| c50379.graph_c0 | 4.57264018    | 5.07572799    | 3.95613475    | 2.04374361     | 4.24182571     | 2.33808528     | 3.226E-07 | -1.682939 | down      | PREDICTED: uncharacterized protein LOC105165869 [Sesamum indicum]                                |
| c50380.graph_c0 | 13.7275447    | 11.8834122    | 6.07515101    | 265.096971     | 356.336618     | 300.672366     | 3.143E-61 | 3.848497  | up        | hypothetical protein MIMGU_mgv1a001548mg [Erythranthe guttata]                                   |
| c50390.graph_c0 | 2.72507421    | 1.70487685    | 2.40750692    | 0.15690726     | 0.08311211     | 0.2094227      | 8.054E-15 | -4.94187  | down      | -                                                                                                |
| c50392.graph_c0 | 0.28398775    | 0             | 0             | 2.7470944      | 3.04879501     | 2.79354066     | 7.956E-08 | 3.921202  | up        | 60S ribosomal protein L11 [Zea mays]                                                             |
| c50393.graph_c0 | 73.6508277    | 72.5687614    | 72.1225064    | 14.8924765     | 4.46740256     | 3.54943822     | 1.37E-163 | -4.242661 | down      | hypothetical protein MIMGU_mgv1a014429mg [Erythranthe guttata]                                   |
| c50401.graph_c0 | 2.54984714    | 2.04192034    | 2.44656871    | 1.22152446     | 1.16133325     | 0.69673405     | 3.855E-08 | -2.205626 | down      | PREDICTED: cytochrome P450 1A21-like [Sesamum indicum]                                           |
| c50411.graph_c0 | 0             | 0             | 0             | 3.31929961     | 4.10246136     | 7.38373208     | 6.381E-08 | Inf       | up        | hypothetical protein MIMGU_mgv1a015512mg [Erythranthe guttata]                                   |
| c50414.graph_c0 | 0             | 0             | 0             | 1.85834811     | 3.12675006     | 2.77212286     | 1.561E-12 | Inf       | up        | 60S ribosomal protein L13a [Rozella allomyces CSF55]                                             |
| c50419.graph_c0 | 15.4534843    | 17.6788099    | 14.3779534    | 7.51127638     | 6.70860465     | 6.99195726     | 1.082E-40 | -2.177604 | down      | PREDICTED: uncharacterized protein At5g05190 [Sesamum indicum]                                   |
| c50427.graph_c0 | 0             | 0.03751075    | 0.04815458    | 10.5294491     | 10.9352384     | 11.3657213     | 7.155E-41 | 7.550391  | up        | PREDICTED: geraniol 8-hydroxylase-like [Sesamum indicum]                                         |
| c50429.graph_c0 | 0.14737923    | 0.88516085    | 0             | 4.20903616     | 5.32198862     | 4.95329605     | 9.305E-06 | 2.801986  | up        | hypothetical protein MIMGU_mgv1a000543mg [Erythranthe guttata]                                   |
| c50432.graph_c0 | 0.80679455    | 0.08076024    | 0.31102888    | 6.39213714     | 7.95280367     | 8.33312016     | 1.876E-09 | 3.226603  | up        | hypothetical protein M569_10692 [Genlisea aurea]                                                 |
| c50437.graph_c0 | 0.21504522    | 0.4783568     | 0.27634163    | 8.43083798     | 8.97808997     | 7.9326165      | 2.039E-28 | 3.691137  | up        | PREDICTED: probable leucine-rich repeat receptor-like protein kinase At1g68400 [Sesamum indicum] |
| c50439.graph_c0 | 6.28449911    | 8.29019112    | 7.38719349    | 2.91728591     | 2.75768645     | 2.31623755     | 1.19E-16  | -2.474066 | down      | PREDICTED: putative clathrin assembly protein At4g40080 [Sesamum indicum]                        |
| c50443.graph_c0 | 8.15727464    | 7.55303469    | 7.86181565    | 54.4838475     | 54.6672192     | 63.0789433     | 5.76E-24  | 1.850682  | up        | hypothetical protein MIMGU_mgv1a017588mg [Erythranthe guttata]                                   |
| c50444.graph_c0 | 3.46002735    | 3.73899709    | 2.5768168     | 2.57181595     | 2.1105492      | 2.03054002     | 8.961E-06 | -1.552127 | down      | PREDICTED: exocyst complex component EXO70A1-like [Sesamum indicum]                              |
| c50446.graph_c0 | 0             | 0.1429521     | 0             | 4.03466173     | 12.5439502     | 13.0723472     | 1.655E-07 | 6.673461  | up        | PREDICTED: short-chain dehydrogenase reductase 2a [Sesamum indicum]                              |
| c50451.graph_c0 | 0             | 0             | 0             | 1.69241003     | 2.86864514     | 3.19250009     | 7.233E-14 | Inf       | up        | PREDICTED: premnaspirodiene oxygenase-like [Sesamum indicum]                                     |
| c50454.graph_c0 | 87.9634008    | 84.0334318    | 84.5277496    | 4.41372722     | 4.97067962     | 4.38726292     | 3.51E-221 | -5.237843 | down      | PREDICTED: LOW QUALITY PROTEIN: putative ETHYLENE INSENSITIVE 3-like 4 protein [Sesamum indicum] |
| c50458.graph_c0 | 0.05331743    | 0.10674165    | 0.13703003    | 1.4490252      | 1.48303035     | 2.0323399      | 9.591E-08 | 3.035129  | up        | PREDICTED: uncharacterized protein LOC105166786 isoform X1 [Sesamum indicum]                     |

| #ID             | 0 h-1<br>FPKM | 0 h-2<br>FPKM | 0 h-3<br>FPKM | 48 h-1<br>FPKM | 48 h-2<br>FPKM | 48 h-3<br>FPKM | FDR       | log2FC    | regulated | nr_annotation                                                                              |
|-----------------|---------------|---------------|---------------|----------------|----------------|----------------|-----------|-----------|-----------|--------------------------------------------------------------------------------------------|
| c50460.graph_c0 | 0.18373335    | 0.06130578    | 0             | 1.04381405     | 1.07590808     | 0.55224725     | 0.002027  | 2.45216   | up        | unnamed protein product [Coffea canephora]                                                 |
| c50463.graph_c0 | 0.6022821     | 0.6028852     | 0.53209499    | 7.73338298     | 5.91482345     | 4.72112558     | 6.853E-07 | 2.393585  | up        | PREDICTED: putative E3 ubiquitin-protein ligase XBAT31 [Sesamum indicum]                   |
| c50469.graph_c0 | 0             | 0             | 0             | 0.37919845     | 1.00428695     | 0.84352126     | 4.601E-07 | Inf       | up        | PREDICTED: uncharacterized protein LOC105170283 [Sesamum indicum]                          |
| c50472.graph_c0 | 0             | 0             | 0             | 35.4457847     | 41.3926504     | 38.2087696     | 1.29E-105 | Inf       | up        | PREDICTED: 1-aminocyclopropane-1-carboxylate oxidase homolog 1-like [Sesamum indicum]      |
| c50479.graph_c0 | 0.85391267    | 0.44773548    | 0.41802346    | 2.62226684     | 4.08758994     | 2.79993272     | 0.0029591 | 1.449611  | up        | PREDICTED: putative receptor-like protein kinase At5g39000 [Sesamum indicum]               |
| c50480.graph_c0 | 50.399795     | 48.3273557    | 55.547837     | 38.1566437     | 48.092841      | 52.8192068     | 1.34E-14  | -1.17333  | down      | PREDICTED: calcium-binding protein-like [Sesamum indicum]                                  |
| c50481.graph_c0 | 0.75901224    | 0.81605171    | 0.43349368    | 11.9649715     | 12.7028725     | 13.2272954     | 1.383E-29 | 3.224568  | up        | hypothetical protein MIMGU_mgv1a003752mg [Erythranthe guttata]                             |
| c50482.graph_c0 | 0.44260548    | 0.08860974    | 0             | 1003.00075     | 905.320913     | 867.864859     | 9.75E-218 | 11.35617  | up        | PREDICTED: putative lipid-binding protein AIR1B [Beta vulgaris subsp. vulgaris]            |
| c50489.graph_c0 | 36.6009765    | 38.3560896    | 32.826525     | 34.5416265     | 27.5226881     | 26.6632099     | 1.373E-20 | -1.291937 | down      | PREDICTED: transcription factor MYC4-like [Sesamum indicum]                                |
| c50491.graph_c0 | 0             | 0.05785681    | 0.07427391    | 29.765712      | 35.4254492     | 38.5672203     | 4.055E-83 | 8.582472  | up        | PREDICTED: adenine phosphoribosyltransferase 1-like [Sesamum indicum]                      |
| c50495.graph_c0 | 0.0576275     | 0.0576852     | 0.14810723    | 11.2551246     | 14.7355717     | 17.5730381     | 1.236E-30 | 6.334806  | up        | PREDICTED: glycerophosphodiester phosphodiesterase GDPDL3-like [Sesamum indicum]           |
| c50497.graph_c0 | 0             | 0             | 0             | 3.02735892     | 3.42578694     | 2.93860992     | 2.401E-12 | Inf       | up        | 60S ribosomal protein L7a [Zea mays]                                                       |
| c50500.graph_c0 | 0             | 0.05444149    | 0             | 2.55534894     | 2.33552203     | 2.09540204     | 5.526E-15 | 6.000583  | up        | PREDICTED: uncharacterized protein LOC105175608 [Sesamum indicum]                          |
| c50502.graph_c0 | 41.2494328    | 42.6694525    | 35.4893789    | 7.84109758     | 11.3743087     | 12.8538211     | 8.035E-81 | -2.91984  | down      | PREDICTED: myb-like protein X [Sesamum indicum]                                            |
| c50507.graph_c0 | 2.55333697    | 2.2757958     | 1.57314888    | 25.6819663     | 27.6165693     | 29.0161595     | 3.396E-38 | 2.669837  | up        | hypothetical protein MIMGU_mgv1a005093mg [Erythranthe guttata]                             |
| c50509.graph_c0 | 19.5535103    | 18.8324868    | 18.7434098    | 95.3279768     | 91.085583      | 88.8944221     | 4.835E-13 | 1.252727  | up        | PREDICTED: serine/threonine-protein phosphatase PP2A-2 catalytic subunit [Sesamum indicum] |
| c50510.graph_c0 | 0.08613714    | 0.03448936    | 0.04427585    | 1.96800776     | 2.57245512     | 3.21980399     | 1.432E-17 | 4.537203  | up        | PREDICTED: probable RNA-dependent RNA polymerase 5 [Sesamum indicum]                       |
| c50511.graph_c0 | 0             | 0             | 0             | 2.41864253     | 4.24374061     | 3.29539329     | 3.349E-12 | Inf       | up        | hypothetical protein MIMGU_mgv1a014011mg [Erythranthe guttata]                             |
| c50512.graph_c0 | 3.64857777    | 3.68734888    | 3.47134279    | 1.77761471     | 2.08860367     | 1.5529525      | 3.106E-09 | -2.013732 | down      | -                                                                                          |
| c50514.graph_c0 | 0             | 0             | 0             | 4.55924979     | 5.04951651     | 6.96108807     | 7.518E-19 | Inf       | up        | PREDICTED: auxin-induced protein OB-like [Sesamum indicum]                                 |
| c50519.graph_c0 | 4.96080443    | 4.28862121    | 3.76694506    | 4.59989334     | 3.26964542     | 2.82546094     | 2.454E-06 | -1.290212 | down      | PREDICTED: vinorine synthase-like isoform X1 [Sesamum indicum]                             |
| c50520.graph_c0 | 31.6957508    | 41.3448845    | 14.5101675    | 571.411276     | 567.543401     | 394.198025     | 1.788E-15 | 3.123342  | up        | PREDICTED: dirigent protein 22-like [Sesamum indicum]                                      |

| #ID             | 0 h-1<br>FPKM | 0 h-2<br>FPKM | 0 h-3<br>FPKM | 48 h-1<br>FPKM | 48 h-2<br>FPKM | 48 h-3<br>FPKM | FDR       | log2FC    | regulated | nr_annotation                                                                |
|-----------------|---------------|---------------|---------------|----------------|----------------|----------------|-----------|-----------|-----------|------------------------------------------------------------------------------|
| c50523.graph_c0 | 0.12596515    | 0.12609129    | 0.08093511    | 3.36537217     | 3.6881418      | 4.28521547     | 6.805E-10 | 4.073776  | up        | PREDICTED: RAN GTPase-activating protein 2-like isoform X2 [Sesamum indicum] |
| c50525.graph_c0 | 2.29575436    | 2.01079656    | 2.67356006    | 0.06609371     | 0.28007308     | 0              | 5.766E-17 | -5.370622 | down      | PREDICTED: uncharacterized protein LOC105162053 [Sesamum indicum]            |
| c50526.graph_c0 | 19.7784066    | 26.8037327    | 19.1597806    | 16.8195307     | 9.50306841     | 9.47841425     | 7.797E-07 | -1.880809 | down      | hypothetical protein M569_14808, partial [Genlisea aurea]                    |
| c50528.graph_c0 | 0.44034514    | 0.22039304    | 0.14146523    | 44.6242127     | 55.4394416     | 74.9908681     | 9.677E-27 | 6.755051  | up        | hypothetical protein CICLE_V10052502mg [Cirus clamentinal]                   |
| c50530.graph_c0 | 0.06171555    | 0.06177735    | 0.39653463    | 1.1371278      | 2.4695305      | 2.12479991     | 0.0005416 | 2.411683  | up        | -                                                                            |
| c50531.graph_c0 | 0             | 0             | 0             | 2.16147167     | 2.21085793     | 2.38750075     | 1.868E-11 | Inf       | up        | ADP/ATP translocase [Cyamochytrium meroiae strain 1001]                      |
| c50532.graph_c0 | 0             | 0             | 0.14587044    | 5.22884135     | 4.87460457     | 6.79278372     | 6.02E-12  | 5.804602  | up        | PREDICTED: chromosome-associated kinesin KIF4A [Sesamum indicum]             |
| c50533.graph_c0 | 0             | 0             | 0             | 2.43776052     | 2.46512478     | 2.90857214     | 1.884E-17 | Inf       | up        | hypothetical protein MIMGU_mgv1a002430mg [Erythranthe guttata]               |
| c50535.graph_c0 | 9.42879944    | 3.88114582    | 7.24718091    | 0              | 0.344008       | 0.07223485     | 2.251E-11 | -6.676435 | down      | 60s ribosomal protein I10 [Lichtheimia corymbifera JMRC:FSU:9682]            |
| c50538.graph_c0 | 0             | 0             | 0             | 68.5001193     | 117.922302     | 135.655911     | 7.256E-36 | Inf       | up        | PREDICTED: beta-glucosidase 12-like [Sesamum indicum]                        |
| c50542.graph_c0 | 0.07725753    | 0             | 0.09927898    | 4.341655       | 4.59945702     | 4.11650169     | 1.2E-11   | 5.18192   | up        | hypothetical protein L484_017688 [Morus notabilis]                           |
| c50544.graph_c0 | 0             | 0             | 0             | 2.32720774     | 3.45155217     | 4.1414709      | 1.355E-11 | Inf       | up        | PREDICTED: glutaredoxin-C5-like [Sesamum indicum]                            |
| c50545.graph_c0 | 1.11761958    | 0.88727553    | 1.18856723    | 8.69854804     | 12.4121174     | 12.4470482     | 4.018E-14 | 2.367989  | up        | PREDICTED: uncharacterized protein LOC105163839 [Sesamum indicum]            |
| c50546.graph_c0 | 5.41415791    | 4.57277009    | 3.91354159    | 18.8604039     | 22.126956      | 28.5707937     | 0.0009194 | 1.303612  | up        | hypothetical protein ZEAMMB73_107586 [Zea mays]                              |
| c50549.graph_c0 | 1.53756357    | 2.19871886    | 1.62300326    | 1.06237788     | 1.23264727     | 0.81025496     | 0.0001268 | -1.803842 | down      | PREDICTED: probable N-acetyltransferase HLS1 [Sesamum indicum]               |
| c50555.graph_c0 | 0             | 0             | 0             | 3.99157481     | 2.77501187     | 4.3286091      | 1.642E-11 | Inf       | up        | hypothetical protein MIMGU_mgv1a016013mg [Erythranthe guttata]               |
| c50557.graph_c0 | 0             | 0             | 0             | 2.22673317     | 2.90937634     | 1.84924487     | 2.407E-11 | Inf       | up        | hypothetical protein SELMODRAFT_103994 [Selaginella moellendorffii]          |
| c50559.graph_c0 | 713.74997     | 751.060965    | 713.806162    | 188.906157     | 116.779812     | 88.6346652     | 3.03E-82  | -3.470929 | down      | PREDICTED: nematode resistance protein-like HSPRO2 [Sesamum indicum]         |
| c50561.graph_c0 | 0.31962102    | 0.55989687    | 0.10268142    | 2.42925975     | 3.50932656     | 2.29254319     | 0.0005181 | 2.055515  | up        | -                                                                            |
| c50562.graph_c0 | 1.31345813    | 1.23509013    | 1.32981782    | 35.9712872     | 46.6920233     | 47.6679696     | 3.589E-62 | 4.047832  | up        | PREDICTED: coatomer subunit gamma-2 isoform X1 [Sesamum indicum]             |
| c50563.graph_c0 | 0             | 0             | 0             | 0.53666284     | 1.20812457     | 1.0346253      | 1.799E-08 | Inf       | up        | PREDICTED: putative transcription factor bHLH086 [Sesamum indicum]           |
| c50565.graph_c0 | 0             | 0             | 0             | 6.07091929     | 18.7384083     | 17.6060866     | 2.484E-09 | Inf       | up        | PREDICTED: pathogenesis-related protein PR-1-like [Sesamum indicum]          |
| c50569.graph_c0 | 0.08393233    | 0             | 0             | 4.3301405      | 10.1575016     | 10.6643681     | 3.208E-09 | 7.217101  | up        | unnamed protein product [Coffea canephora]                                   |

| #ID             | 0 h-1<br>FPKM | 0 h-2<br>FPKM | 0 h-3<br>FPKM | 48 h-1<br>FPKM | 48 h-2<br>FPKM | 48 h-3<br>FPKM | FDR       | log2FC    | regulated | nr_annotation                                                                                         |
|-----------------|---------------|---------------|---------------|----------------|----------------|----------------|-----------|-----------|-----------|-------------------------------------------------------------------------------------------------------|
| c50570.graph_c0 | 0.42947954    | 0.19107093    | 0.49057619    | 11.9138996     | 13.645942      | 14.8256356     | 8.865E-27 | 4.158851  | up        | PREDICTED: uncharacterized protein LOC105162704 [Sesamum indicum]                                     |
| c50572.graph_c0 | 0             | 0             | 0             | 2.12198157     | 2.45234418     | 2.78927769     | 6.61E-13  | Inf       | up        | PREDICTED: glyoxylate/succinic semialdehyde reductase 1 [Sesamum indicum]                             |
| c50575.graph_c0 | 0.61530483    | 0.57192661    | 0.5930183     | 3.27968388     | 3.64600405     | 3.94503219     | 1.94E-05  | 1.590405  | up        | PREDICTED: probable beta-D-xylosidase / [Sesamum indicum]                                             |
| c50578.graph_c0 | 48.7998054    | 50.9257011    | 53.0316523    | 3.53996565     | 3.60015779     | 3.14984015     | 1.62E-138 | -4.909412 | down      | PREDICTED: stachyose synthase [Sesamum indicum]                                                       |
| c50580.graph_c0 | 0.61297274    | 0.68176282    | 0.35008633    | 7.94777694     | 12.097788      | 13.1574265     | 3.161E-15 | 3.315595  | up        | PREDICTED: centrosome-associated protein CEP250 [Sesamum indicum]                                     |
| c50581.graph_c0 | 0.26525512    | 0             | 0             | 31.1572152     | 33.6544933     | 41.2047354     | 2.325E-37 | 7.643553  | up        | -                                                                                                     |
| c50587.graph_c0 | 0             | 0             | 0             | 8.82150393     | 10.0870053     | 12.8330171     | 1.792E-15 | Inf       | up        | PREDICTED: 7-deoxyloganetin glucosyltransferase-like [Eucalyptus grandis]                             |
| c50588.graph_c0 | 20.8989179    | 22.2468501    | 26.0542672    | 9.84224681     | 10.7310953     | 9.97212581     | 6.646E-24 | -2.200559 | down      | PREDICTED: 1,2-dihydroxy-3-keto-5-methylthiopentene dioxygenase 2 [Sesamum indicum]                   |
| c50589.graph_c0 | 286.708522    | 275.459707    | 283.258028    | 246.185405     | 228.92552      | 207.049888     | 1.233E-19 | -1.324784 | down      | PREDICTED: coiled-coil domain-containing protein 9-like [Sesamum indicum]                             |
| c50592.graph_c0 | 0.44148119    | 0.41430306    | 0.31911796    | 29.1059908     | 31.9383771     | 31.982748      | 3.59E-111 | 5.29099   | up        | PREDICTED: dihydrolipoyl dehydrogenase 2, chloroplastic-like isoform X1 [Sesamum indicum]             |
| c50601.graph_c0 | 0.08169489    | 0.16355339    | 0.27994977    | 12.3179886     | 10.0461894     | 12.6346787     | 9.256E-47 | 5.032417  | up        | PREDICTED: protein CYPRO4 [Sesamum indicum]                                                           |
| c50602.graph_c0 | 0.17728643    | 0.4056319     | 0.45564016    | 2.54324753     | 3.60882849     | 3.50863591     | 2.946E-07 | 2.187725  | up        | PREDICTED: putative 1-phosphatidylinositol-3-phosphate 5-kinase FAB1C isoform X2 [Populus euphratica] |
| c50608.graph_c0 | 0.54939381    | 0.43995516    | 0.84719136    | 5.1626016      | 4.93295919     | 6.9355136      | 4.212E-05 | 2.187739  | up        | PREDICTED: palmitoyl-monogalactosyldiacylglycerol delta-7 desaturase, chloroplastic [Sesamum indicum] |
| c50610.graph_c0 | 41.4271626    | 37.0731854    | 38.8513093    | 45.2944763     | 25.7834993     | 24.9605628     | 1.308E-08 | -1.294303 | down      | PREDICTED: uncharacterized acetyltransferase At3g50280-like [Sesamum indicum]                         |
| c50612.graph_c0 | 2.89303925    | 3.20901037    | 2.11002891    | 0.28813583     | 0.30524498     | 0.12819077     | 2.385E-15 | -4.518041 | down      | PREDICTED: uncharacterized protein LOC105161205 [Sesamum indicum]                                     |
| c50616.graph_c0 | 1.44832106    | 1.67989377    | 1.8611499     | 2.13909636     | 0.76284999     | 0.73495889     | 0.0004034 | -1.453693 | down      | PREDICTED: G-type recA S-receptor-like serine/threonine-protein kinase At2g19130 [Sesamum indicum]    |
| c50618.graph_c0 | 14.5959802    | 8.74138216    | 10.3400735    | 0              | 0              | 0              | 2.766E-34 | -Inf      | down      | NADH dehydrogenase subunit 2 [Amorpha theca resinosa]                                                 |
| c50620.graph_c0 | 0.51292871    | 0.51344233    | 0.47080978    | 2.97027269     | 4.4339071      | 4.50499564     | 0.000223  | 1.967955  | up        | PREDICTED: zinc finger protein ZAT5 [Sesamum indicum]                                                 |
| c50621.graph_c0 | 6.86703354    | 9.87630723    | 6.69437998    | 24.7964194     | 32.5086024     | 41.1510742     | 0.0012291 | 1.048354  | up        | PREDICTED: plastidic ATP/ADP-transporter [Sesamum indicum]                                            |
| c50625.graph_c0 | 2.81922329    | 3.03108678    | 1.94558505    | 0.72145899     | 0.45857899     | 0.98432314     | 5.622E-10 | -2.860776 | down      | PREDICTED: salicylate carboxymethyltransferase [Sesamum indicum]                                      |
| c50627.graph_c0 | 0.38795624    | 0.6472412     | 0.08308986    | 6.49295915     | 8.51924672     | 8.53358492     | 3.696E-11 | 3.385349  | up        | hypothetical protein MIMGU_mgv1a009322mg [Erythranthe guttata]                                        |

| #ID             | 0 h-1<br>FPKM | 0 h-2<br>FPKM | 0 h-3<br>FPKM | 48 h-1<br>FPKM | 48 h-2<br>FPKM | 48 h-3<br>FPKM | FDR       | log2FC    | regulated | nr_annotation                                                                                     |
|-----------------|---------------|---------------|---------------|----------------|----------------|----------------|-----------|-----------|-----------|---------------------------------------------------------------------------------------------------|
| c50631.graph_c0 | 1.58383495    | 1.05694728    | 1.91193967    | 31.7913924     | 35.5059486     | 36.1170946     | 9.122E-52 | 3.482214  | up        | PREDICTED: uncharacterized protein LOC105167007 [Sesamum indicum]                                 |
| c50634.graph_c0 | 2.78354283    | 2.67634341    | 1.74141607    | 1.34967432     | 1.35832547     | 1.291002       | 1.674E-06 | -1.861186 | down      | PREDICTED: anthocyanidin 3-O-glucosyltransferase-like [Sesamum indicum]                           |
| c50640.graph_c0 | 303.97244     | 300.207546    | 317.481325    | 53.8815791     | 76.5346137     | 87.5022715     | 1.081E-97 | -3.105631 | down      | PREDICTED: uncharacterized protein LOC105162278 [Sesamum indicum]                                 |
| c50641.graph_c0 | 0             | 0.16129723    | 0             | 2.00405985     | 1.96579482     | 1.78320041     | 1.192E-08 | 4.151941  | up        | PREDICTED: KH domain-containing protein At4g18375-like [Glycine max]                              |
| c50642.graph_c0 | 49.6168481    | 42.571313     | 48.8371513    | 201.319729     | 231.819394     | 237.113358     | 4.406E-16 | 1.228101  | up        | PREDICTED: 60S ribosomal protein L6-like [Sesamum indicum]                                        |
| c50648.graph_c0 | 4.53925679    | 2.54896219    | 3.84132601    | 0              | 0              | 0              | 4.904E-20 | -Inf      | down      | PREDICTED: 60S ribosomal protein L50 [Nectria haematococca mpv1 // -12 AT]                        |
| c50650.graph_c0 | 0             | 0             | 0             | 2.22712283     | 2.60772096     | 2.19027845     | 6.941E-16 | Inf       | up        | PREDICTED: asparagine--tRNA ligase, cytoplasmic 2 [Sesamum indicum]                               |
| c50651.graph_c0 | 0.07805779    | 0             | 0             | 1.65397439     | 3.12346076     | 4.09515537     | 8.168E-08 | 5.82032   | up        | PREDICTED: scarecrow-like protein 52 [Sesamum indicum]                                            |
| c50652.graph_c0 | 4.50628147    | 5.2537481     | 5.99512951    | 0.29304568     | 0.36218742     | 0.2172919      | 5.073E-30 | -5.195189 | down      | PREDICTED: uncharacterized protein LOC105162763 [Sesamum indicum]                                 |
| c50653.graph_c0 | 0             | 0             | 0             | 2.4724756      | 2.8748284      | 2.09267715     | 6.207E-12 | Inf       | up        | unnamed protein product [Coffea canephora]                                                        |
| c50654.graph_c0 | 3.82155568    | 4.36592555    | 4.13685763    | 1.49245639     | 2.57431699     | 3.04754091     | 4.834E-13 | -1.82089  | down      | PREDICTED: pentatricopeptide repeat-containing protein At1g15510, chloroplastic [Sesamum indicum] |
| c50658.graph_c0 | 0.20065574    | 0.26780889    | 0.08595019    | 6.77809567     | 7.44168213     | 9.64977404     | 1.137E-14 | 4.415091  | up        | hypothetical protein MIMGU_mgv1a000413mg [Erythranthe guttata]                                    |
| c50662.graph_c0 | 9.02014408    | 10.3940519    | 9.70429585    | 7.05379058     | 7.21672362     | 9.11370639     | 6.235E-08 | -1.336331 | down      | hypothetical protein MIMGU_mgv1a005797mg [Erythranthe guttata]                                    |
| c50663.graph_c0 | 1.23502862    | 0.78671429    | 1.0099477     | 0.17239226     | 0.25568018     | 0.18407232     | 7.214E-10 | -3.330085 | down      | PREDICTED: cell division cycle 20.2, cofactor of APC complex-like [Sesamum indicum]               |
| c50664.graph_c0 | 0             | 0             | 0             | 4.50097689     | 3.97353271     | 3.22620342     | 2.36E-11  | Inf       | up        | -                                                                                                 |
| c50666.graph_c0 | 0.23901213    | 0.13956335    | 0.10238002    | 17.4503399     | 11.64398       | 11.5270331     | 3.472E-17 | 5.398066  | up        | PREDICTED: protein LONGIFOLIA 1 [Sesamum indicum]                                                 |
| c50667.graph_c0 | 0.79374257    | 0.39726869    | 0.50999531    | 4.29607864     | 4.2606739      | 4.55461695     | 0.0004598 | 1.931338  | up        | PREDICTED: BEL1-like homeodomain protein 4 [Sesamum indicum]                                      |
| c50671.graph_c0 | 5.04412659    | 5.86457265    | 5.91825869    | 1.03907592     | 2.87424568     | 3.90371258     | 5.65E-15  | -2.14146  | down      | PREDICTED: uncharacterized protein LOC105159806 [Sesamum indicum]                                 |
| c50675.graph_c0 | 4.38530982    | 4.81111235    | 3.69675466    | 2.94114434     | 2.53371593     | 3.50852232     | 2.819E-07 | -1.536439 | down      | PREDICTED: BTB/POZ domain-containing protein NPY4-like [Sesamum indicum]                          |
| c50677.graph_c0 | 0.0459518     | 0.09199564    | 0             | 1.52401679     | 0.94179808     | 1.73274458     | 5.115E-07 | 3.928861  | up        | hypothetical protein MIMGU_mgv1a012682mg [Erythranthe guttata]                                    |
| c50679.graph_c0 | 2.58355395    | 2.58614099    | 2.45923638    | 7.31672179     | 13.8836388     | 16.707348      | 0.0082355 | 1.284196  | up        | PREDICTED: uncharacterized protein LOC105164931 [Sesamum indicum]                                 |

| #ID             | 0 h-1<br>FPKM | 0 h-2<br>FPKM | 0 h-3<br>FPKM | 48 h-1<br>FPKM | 48 h-2<br>FPKM | 48 h-3<br>FPKM | FDR       | log2FC    | regulated | nr_annotation                                                                               |
|-----------------|---------------|---------------|---------------|----------------|----------------|----------------|-----------|-----------|-----------|---------------------------------------------------------------------------------------------|
| c50680.graph_c0 | 345.41294     | 353.58575     | 361.081399    | 121.960805     | 75.0942403     | 62.6640729     | 6.223E-84 | -3.035386 | down      | PREDICTED: transcription factor HBP-1b(c38)-like [Sesamum indicum]                          |
| c50683.graph_c0 | 7.53892895    | 5.65985854    | 5.65122961    | 0.86816913     | 1.53286655     | 1.28748613     | 1.112E-09 | -3.377709 | down      | hypothetical protein MIMGU_mgv1a022729mg [Erythranthe guttata]                              |
| c50685.graph_c0 | 40.9749491    | 44.192071     | 38.0988354    | 16.5642093     | 18.5133981     | 17.591392      | 1.317E-52 | -2.244839 | down      | hypothetical protein MIMGU_mgv1a008021mg [Erythranthe guttata]                              |
| c50686.graph_c0 | 0.14386653    | 0.1440106     | 0.06162473    | 8.7034098      | 11.4667553     | 11.9111941     | 3.837E-27 | 5.505274  | up        | PREDICTED: PI-PLC X-box domain-containing protein DDB_G0293730 [Sesamum indicum]            |
| c50688.graph_c0 | 0             | 0             | 0             | 1.87568236     | 1.98705802     | 1.66897088     | 2.211E-10 | Inf       | up        | hypothetical protein L969DRAFT_613963, partial [Mixia osmundae IAM 14324]                   |
| c50690.graph_c0 | 0             | 0.03794991    | 0             | 2.61952208     | 3.99609506     | 3.3564024      | 3.279E-16 | 7.025369  | up        | PREDICTED: uncharacterized protein LOC105174731 [Sesamum indicum]                           |
| c50691.graph_c0 | 0             | 0             | 0             | 3.1848023      | 1.86641933     | 1.68823196     | 1.155E-06 | Inf       | up        | Leucine-rich repeat transmembrane protein kinase [Theobroma cacao]                          |
| c50692.graph_c0 | 0             | 0             | 0             | 2.31375012     | 2.05579291     | 1.9923493      | 2.036E-11 | Inf       | up        | actin [Pseudozyma antarctica]                                                               |
| c50693.graph_c0 | 273.781085    | 280.142221    | 299.616389    | 170.968345     | 100.506341     | 68.7939032     | 2.79E-34  | -2.330949 | down      | PREDICTED: organic cation/carnitine transporter 3-like [Sesamum indicum]                    |
| c50694.graph_c0 | 0             | 0             | 0             | 1.28533383     | 0.94999209     | 1.14368231     | 9.972E-12 | Inf       | up        | PREDICTED: protein kinase PINOID [Sesamum indicum]                                          |
| c50696.graph_c0 | 0             | 0.0494687     | 0             | 15.8438162     | 18.7138667     | 26.0078856     | 1.787E-29 | 9.246474  | up        | PREDICTED: (RS)-norcochlorine 6-O-methyltransferase-like [Sesamum indicum]                  |
| c50700.graph_c0 | 0.99395712    | 2.27417697    | 1.64220976    | 113.284941     | 142.739039     | 108.249701     | 8.719E-59 | 5.191844  | up        | -                                                                                           |
| c50702.graph_c0 | 0.20345731    | 0.13577403    | 0.17430047    | 1.74942271     | 1.85330123     | 1.77900092     | 5.163E-05 | 2.371654  | up        | -                                                                                           |
| c50703.graph_c0 | 0.7552396     | 0.54431701    | 0.23292307    | 12.6352917     | 15.5968303     | 16.2698765     | 3.073E-39 | 3.847892  | up        | PREDICTED: fructokinase-like 2, chloroplastic [Sesamum indicum]                             |
| c50706.graph_c0 | 0             | 0             | 0             | 5.94422537     | 4.65819239     | 4.99932032     | 3.247E-14 | Inf       | up        | PREDICTED: uncharacterized protein LOC105155422 [Sesamum indicum]                           |
| c50709.graph_c0 | 0             | 0.79007248    | 0             | 13.8156255     | 8.21669052     | 4.96035774     | 0.0015144 | 4.103527  | up        | -                                                                                           |
| c50710.graph_c0 | 2.69964503    | 2.83746573    | 1.90803291    | 0.66322376     | 1.88825134     | 1.54909784     | 5.495E-06 | -1.889729 | down      | PREDICTED: multiple C2 and transmembrane domain-containing protein 1-like [Sesamum indicum] |
| c50711.graph_c0 | 0             | 0.05944843    | 0.15263434    | 3.99404802     | 3.41974472     | 2.77494733     | 6.494E-11 | 4.55334   | up        | -                                                                                           |
| c50715.graph_c0 | 0.20363145    | 0.47561584    | 0.34889931    | 2.75144581     | 4.90220266     | 5.7310603      | 3.864E-06 | 2.672666  | up        | PREDICTED: aspartic proteinase nepenthesin-2-like [Sesamum indicum]                         |
| c50718.graph_c0 | 11.2470347    | 12.1916272    | 10.6711715    | 3.97280385     | 3.92433207     | 4.77699592     | 4.437E-37 | -2.446182 | down      | PREDICTED: formin BNI1-like [Sesamum indicum]                                               |
| c50719.graph_c0 | 6.27084837    | 5.7064797     | 6.34895451    | 41.9278464     | 40.9864747     | 42.4475873     | 2.776E-13 | 1.756367  | up        | PREDICTED: transmembrane protein 256 homolog [Sesamum indicum]                              |
| c50721.graph_c0 | 2.07970969    | 0.80958586    | 1.33625465    | 10.4313607     | 8.23168994     | 5.58799961     | 0.005925  | 1.513491  | up        | PREDICTED: LOW QUALITY PROTEIN: GDSE esterase/lipase At2g27360-like [Sesamum indicum]       |

| #ID             | 0 h-1<br>FPKM | 0 h-2<br>FPKM | 0 h-3<br>FPKM | 48 h-1<br>FPKM | 48 h-2<br>FPKM | 48 h-3<br>FPKM | FDR       | log2FC    | regulated | nr_annotation                                                                              |
|-----------------|---------------|---------------|---------------|----------------|----------------|----------------|-----------|-----------|-----------|--------------------------------------------------------------------------------------------|
| c50723.graph_c0 | 2.82617691    | 2.73470667    | 2.23957869    | 50.4675807     | 40.224632      | 38.4189347     | 1.414E-19 | 3.038763  | up        | hypothetical protein MIMGU_mgv1a005711mg [Erythranthe guttata]                             |
| c50724.graph_c0 | 2.2845635     | 2.68456439    | 2.72301872    | 38.860488      | 56.8725557     | 64.4330965     | 2.438E-17 | 3.353696  | up        | PREDICTED: protein ASPARTIC PROTEASE IN GUARD CELL 1-like [Sesamum indicum]                |
| c50726.graph_c0 | 5.91185096    | 6.075578      | 7.09049837    | 4.28448773     | 4.69275608     | 7.94770007     | 0.001162  | -1.197986 | down      | PREDICTED: magnesium-dependent phosphatase 1-like [Sesamum indicum]                        |
| c50728.graph_c0 | 1.95585023    | 2.84772177    | 1.82788726    | 0.32761033     | 0.0578439      | 0.24292142     | 4.953E-15 | -4.39682  | down      | PREDICTED: UDP-glycosyltransferase 76C4-like [Sesamum indicum]                             |
| c50732.graph_c0 | 3.83176444    | 2.94237913    | 2.76551684    | 14.700571      | 19.2619264     | 17.813548      | 1.493E-07 | 1.420959  | up        | PREDICTED: heat stress transcription factor C-1-like [Sesamum indicum]                     |
| c50734.graph_c0 | 7.20201781    | 7.8138746     | 7.40390242    | 4.83710611     | 6.16733209     | 3.88505176     | 1.396E-09 | -1.609503 | down      | PREDICTED: putative chromatin-remodeling complex ATPase chain isoform X1 [Sesamum indicum] |
| c50735.graph_c0 | 0.28607846    | 0.28636492    | 0.18381107    | 27.541407      | 23.0343009     | 13.7187697     | 3.757E-10 | 5.404147  | up        | PREDICTED: uncharacterized protein LOC104450130 [Eucalyptus grandis]                       |
| c50737.graph_c0 | 4.20627716    | 5.62608458    | 5.12565168    | 4.17575094     | 4.98993561     | 3.92362933     | 1.243E-05 | -1.212578 | down      | PREDICTED: uncharacterized protein LOC105171448 [Sesamum indicum]                          |
| c50738.graph_c0 | 0             | 0             | 0.24172594    | 7.84169608     | 10.3267866     | 6.59199711     | 5.09E-22  | 5.626347  | up        | elongation factor 1-alpha [Lichtheimia corymbifera JMRC:FSU:9682]                          |
| c50739.graph_c0 | 0.31447309    | 0.44969712    | 0.34638032    | 7.16005287     | 7.10291136     | 9.7221769      | 6.875E-15 | 3.41345   | up        | PREDICTED: uncharacterized protein LOC105163344 [Sesamum indicum]                          |
| c50740.graph_c0 | 3.76372764    | 2.47925572    | 2.87071994    | 0              | 0              | 0              | 1.681E-43 | -Inf      | down      | hypothetical protein SELMODRAFT_118280 [Selaginella moellendorffii]                        |
| c50741.graph_c0 | 0             | 0             | 0             | 2.60735781     | 2.76217944     | 2.3200113      | 1.659E-09 | Inf       | up        | hypothetical protein M569_01958 [Genlisea aurea]                                           |
| c50742.graph_c0 | 7.37808179    | 7.71371292    | 7.37421005    | 47.2780948     | 46.5650285     | 54.0295249     | 3.017E-09 | 1.700411  | up        | hypothetical protein MIMGU_mgv1a016086mg [Erythranthe guttata]                             |
| c50746.graph_c0 | 0.73528336    | 0.44161178    | 0.18897365    | 7.34969227     | 8.18079526     | 9.25203493     | 1.052E-15 | 3.17171   | up        | hypothetical protein MIMGU_mgv1a005428mg [Erythranthe guttata]                             |
| c50747.graph_c0 | 10.3226229    | 11.1191629    | 11.044537     | 6.14007053     | 6.94268446     | 6.86143903     | 1.146E-23 | -1.72397  | down      | PREDICTED: exocyst complex component EXO70B1 [Sesamum indicum]                             |
| c50748.graph_c0 | 0.12265192    | 0             | 0.07880629    | 9.83056062     | 11.3120703     | 11.0093738     | 1.202E-24 | 6.298452  | up        | hypothetical protein MIMGU_mgv1a006779mg [Erythranthe guttata]                             |
| c50749.graph_c0 | 0.23840847    | 0.2386472     | 0.20424288    | 2.34279924     | 3.17994938     | 3.12691301     | 1.042E-05 | 2.645019  | up        | PREDICTED: protein IRX15-LIKE-like [Nicotiana tomentosiformis]                             |
| c50754.graph_c0 | 0             | 0.0813497     | 0             | 9.69562355     | 11.064491      | 14.7560179     | 2.805E-32 | 7.759731  | up        | PREDICTED: chaperonin CPN60, mitochondrial [Sesamum indicum]                               |
| c50762.graph_c1 | 2.89160879    | 3.67107862    | 2.26575108    | 2.59896451     | 2.40912678     | 3.12193304     | 0.0078086 | -1.133637 | down      | -                                                                                          |



| #ID             | 0 h-1<br>FPKM | 0 h-2<br>FPKM | 0 h-3<br>FPKM | 48 h-1<br>FPKM | 48 h-2<br>FPKM | 48 h-3<br>FPKM | FDR       | log2FC    | regulated | nr_annotation                                                                                                                           |
|-----------------|---------------|---------------|---------------|----------------|----------------|----------------|-----------|-----------|-----------|-----------------------------------------------------------------------------------------------------------------------------------------|
| c50763.graph_c0 | 1.80695601    | 2.08008021    | 2.28330984    | 55.8224615     | 56.2860847     | 65.0011937     | 2.94E-108 | 3.822421  | up        | PREDICTED: dihydrolipoyllysine-residue acetyltransferase component 5 of pyruvate dehydrogenase complex, chloroplastic [Sesamum indicum] |
| c50764.graph_c0 | 0             | 0             | 0             | 6.98873463     | 8.61248703     | 6.72616948     | 5.615E-13 | Inf       | up        | PREDICTED: uncharacterized protein LOC100267736 [Vitis vinifera]                                                                        |
| c50766.graph_c0 | 1.18041195    | 0.89903888    | 1.15414486    | 22.529593      | 37.5666924     | 39.5254381     | 4.964E-16 | 3.917814  | up        | PREDICTED: uncharacterized protein LOC105178721 [Sesamum indicum]                                                                       |
| c50767.graph_c0 | 6.10538876    | 6.48498308    | 5.84066267    | 1.09368823     | 1.65518581     | 1.55705154     | 4.335E-27 | -3.121522 | down      | PREDICTED: uncharacterized protein LOC102659506 [Glycine max]                                                                           |
| c50770.graph_c0 | 0.47975642    | 0.38418946    | 0.1233012     | 21.2151794     | 23.1304283     | 24.3043165     | 4.495E-27 | 5.11102   | up        | cyclin D [Scutellaria baicalensis]                                                                                                      |
| c50771.graph_c0 | 2.89812941    | 2.53129215    | 3.10350919    | 1.33497292     | 1.27559077     | 1.74683953     | 1.446E-08 | -1.990002 | down      | PREDICTED: pentatricopeptide repeat-containing protein At3g05340 [Sesamum indicum]                                                      |
| c50772.graph_c0 | 0             | 0             | 0             | 32.2975823     | 48.8623637     | 69.5818614     | 4.711E-18 | Inf       | up        | PREDICTED: uncharacterized protein LOC105158508 [Sesamum indicum]                                                                       |
| c50773.graph_c0 | 0.19101167    | 0             | 0.08181919    | 1.52509424     | 2.60990007     | 2.9750047      | 2.707E-07 | 3.681225  | up        | PREDICTED: probable leucine-rich repeat receptor-like protein kinase At1g68400 [Sesamum indicum]                                        |
| c50774.graph_c0 | 2.83675133    | 2.97481057    | 2.43022518    | 0.37334291     | 0.39551154     | 0.11073276     | 1.387E-12 | -4.2376   | down      | -                                                                                                                                       |
| c50775.graph_c0 | 0             | 0             | 0             | 3.84929357     | 5.03735621     | 5.10403821     | 5.425E-14 | Inf       | up        | kunitz trypsin inhibitor [Populus tremula]                                                                                              |
| c50776.graph_c0 | 17.667833     | 19.8000983    | 19.0021478    | 3.71534743     | 8.05934686     | 7.39890518     | 2.1E-12   | -2.588554 | down      | PREDICTED: RNA-binding protein cabeza [Nicotiana glauca]                                                                                |
| c50777.graph_c0 | 0             | 0             | 0             | 1.26355647     | 1.97265138     | 1.42017467     | 1.128E-10 | Inf       | up        | hypothetical protein CICLE_V100255 / 5mg [Citrus clementina]                                                                            |
| c50781.graph_c0 | 0.17726384    | 0             | 0.07593035    | 2.99396182     | 3.11407152     | 4.74678007     | 1.044E-10 | 4.405362  | up        | PREDICTED: glutaminyl-peptide cyclotransferase [Sesamum indicum]                                                                        |
| c50786.graph_c0 | 0.35852555    | 0.29907046    | 0.46071952    | 5.78019956     | 4.4905084      | 5.04522135     | 8.698E-08 | 2.758661  | up        | PREDICTED: uncharacterized protein LOC105162253 isoform X1 [Sesamum indicum]                                                            |
| c50789.graph_c0 | 21.9447532    | 22.9743756    | 25.0953031    | 11.3140662     | 9.0385334      | 5.94129132     | 4.92E-13  | -2.423883 | down      | PREDICTED: uncharacterized protein LOC102593092 [Solanum tuberosum]                                                                     |
| c50792.graph_c0 | 0.03241004    | 0.03244249    | 0.08329637    | 11.1371248     | 8.85673273     | 12.3008383     | 1.054E-39 | 6.741099  | up        | PREDICTED: cell division cycle 20.2, cofactor of APC complex-like [Sesamum indicum]                                                     |
| c50794.graph_c0 | 24.1375075    | 19.2950702    | 22.6582854    | 0.12616764     | 0.2339038      | 0.28065802     | 3.61E-137 | -7.717658 | down      | PREDICTED: cytochrome P450 80B1-like [Sesamum indicum]                                                                                  |
| c50795.graph_c0 | 10.965696     | 9.76266621    | 8.57169893    | 52.699631      | 54.0040737     | 66.6509982     | 3.32E-18  | 1.547403  | up        | PREDICTED: cateoyismikimate esterase [Sesamum indicum]                                                                                  |
| c50796.graph_c0 | 0.72185373    | 0.12042943    | 0.15460177    | 5.43098638     | 10.9198541     | 10.5525126     | 1.587E-07 | 3.736879  | up        | PREDICTED: glucomannan 4-beta-mannosyltransferase 2-like [Sesamum indicum]                                                              |
| c50803.graph_c0 | 176.448717    | 201.715778    | 152.243778    | 25.0022361     | 27.9827719     | 24.6858616     | 5.888E-58 | -3.788265 | down      | -                                                                                                                                       |
| c50807.graph_c0 | 0             | 0             | 0             | 4.24067316     | 3.88772221     | 4.49896499     | 5.679E-13 | Inf       | up        | PREDICTED: uncharacterized protein LOC105159678 [Sesamum indicum]                                                                       |
| c50809.graph_c0 | 0.06191221    | 0.12394841    | 0             | 7.52895838     | 4.35055553     | 3.55261767     | 2.006E-06 | 5.386181  | up        | -                                                                                                                                       |

| #ID             | 0 h-1<br>FPKM | 0 h-2<br>FPKM | 0 h-3<br>FPKM | 48 h-1<br>FPKM | 48 h-2<br>FPKM | 48 h-3<br>FPKM | FDR       | log2FC    | regulated | nr_annotation                                                                                             |
|-----------------|---------------|---------------|---------------|----------------|----------------|----------------|-----------|-----------|-----------|-----------------------------------------------------------------------------------------------------------|
| c50811.graph_c0 | 0.10369449    | 0.18164706    | 0.1665644     | 1.86283743     | 3.82039753     | 4.97262464     | 1.911E-05 | 3.526243  | up        | PREDICTED: probable inactive leucine-rich repeat receptor-like protein kinase At1g66830 [Sesamum indicum] |
| c50812.graph_c0 | 29.4804301    | 34.1652633    | 28.9697505    | 181.618709     | 179.709479     | 192.812496     | 4.657E-27 | 1.563934  | up        | PREDICTED: NADH dehydrogenase [ubiquinone] 1 alpha subcomplex subunit 13-B-like [Sesamum indicum]         |
| c50814.graph_c0 | 25.2028735    | 24.4352269    | 29.795755     | 3.64862628     | 3.58416607     | 2.30208188     | 5.556E-56 | -4.07437  | down      | -                                                                                                         |
| c50815.graph_c0 | 0             | 0             | 0.20313507    | 5.97086078     | 1.69705934     | 2.52683664     | 0.0044565 | 4.621734  | up        | PREDICTED: acid phosphatase 1-like [Nicotiana glauca]                                                     |
| c50818.graph_c0 | 1.40460155    | 1.15788898    | 1.27409549    | 26.5652757     | 26.691203      | 22.0121127     | 8.758E-22 | 3.278455  | up        | PREDICTED: uncharacterized protein LOC105164615 [Sesamum indicum]                                         |
| c50820.graph_c0 | 0.11291623    | 0.24220563    | 0.24874598    | 3.29910374     | 4.75445997     | 3.84791485     | 2.478E-18 | 3.27312   | up        | PREDICTED: probable RNA-dependent RNA polymerase 1 [Sesamum indicum]                                      |
| c50823.graph_c0 | 3.65353427    | 4.65460893    | 2.1340619     | 0.30598855     | 0.38898932     | 0.16336006     | 3.632E-10 | -4.615758 | down      | PREDICTED: uncharacterized protein LOC105158347 [Sesamum indicum]                                         |
| c50824.graph_c0 | 1.25416558    | 1.65487372    | 1.025597      | 10.8189247     | 11.8508018     | 12.1500955     | 5.984E-09 | 2.129361  | up        | PREDICTED: tetraspanin-3-like [Sesamum indicum]                                                           |
| c50826.graph_c0 | 0             | 0             | 0             | 8.49942903     | 12.2783379     | 11.3705544     | 3.92E-27  | Inf       | up        | PREDICTED: adenosine kinase 2-like [Sesamum indicum]                                                      |
| c50827.graph_c0 | 0.3603393     | 0.54105019    | 0.46305027    | 4.48156894     | 7.5611182      | 6.49843022     | 6.33E-06  | 2.73765   | up        | -                                                                                                         |
| c50830.graph_c0 | 0.02938713    | 0.02941655    | 0.03776362    | 10.4503087     | 15.7171438     | 19.6571902     | 1.006E-23 | 7.861402  | up        | PREDICTED: delta(8)-fatty-acid desaturase 2-like [Sesamum indicum]                                        |
| c50831.graph_c0 | 19.8766683    | 22.3290681    | 21.1384599    | 1.4350849      | 1.70273425     | 1.37908431     | 1.483E-84 | -4.829205 | down      | PREDICTED: uncharacterized protein LOC105179506 [Sesamum indicum]                                         |
| c50833.graph_c0 | 0             | 0.03865387    | 0.04962206    | 2.20564013     | 0.97986798     | 0.75970271     | 0.0030877 | 4.470506  | up        | PREDICTED: U-box domain-containing protein 21 [Sesamum indicum]                                           |
| c50834.graph_c0 | 0.66313779    | 0.92932255    | 1.19302165    | 5.49833209     | 5.30705471     | 6.08829863     | 0.0025089 | 1.577537  | up        | PREDICTED: receptor-like protein kinase HSL1 [Sesamum indicum]                                            |
| c50835.graph_c0 | 46.864079     | 46.3310625    | 44.5048653    | 15.8938159     | 12.3140443     | 11.5037476     | 8.576E-65 | -2.805082 | down      | PREDICTED: RING-H2 finger protein ATL80-like [Sesamum indicum]                                            |
| c50838.graph_c0 | 24.7811436    | 29.5796133    | 23.7467728    | 14.2001067     | 14.2121701     | 10.8899804     | 5.08E-23  | -2.005164 | down      | ring finger protein, putative [Ricinus communis]                                                          |
| c50839.graph_c0 | 5.95162086    | 6.64189718    | 5.16761381    | 0.29637953     | 0.15698909     | 0.03296459     | 1.096E-49 | -6.1837   | down      | PREDICTED: E3 ubiquitin-protein ligase PUB23-like [Sesamum indicum]                                       |
| c50841.graph_c0 | 3.75864793    | 3.69970479    | 4.66901102    | 28.7982184     | 30.8750528     | 32.3515499     | 1.286E-16 | 1.902139  | up        | hypothetical protein MIMGU_mgv1a012263mg [Erythranthe guttata]                                            |
| c50849.graph_c0 | 29.5396833    | 28.7478944    | 34.309695     | 16.5725569     | 16.1397649     | 18.4715076     | 3.318E-25 | -1.875052 | down      | PREDICTED: polyadenylate-binding protein-interacting protein 6-like [Sesamum indicum]                     |
| c50852.graph_c0 | 5.35562966    | 5.39874598    | 5.81594041    | 1.18136959     | 2.09813284     | 1.45309563     | 1.452E-19 | -2.834317 | down      | PREDICTED: F-box/kelch-repeat protein At3g23880-like [Sesamum indicum]                                    |
| c50857.graph_c0 | 0.06191221    | 0             | 0             | 4.04966701     | 4.41097991     | 3.40036263     | 1.819E-13 | 6.585891  | up        | PREDICTED: uncharacterized protein LOC105165400 [Sesamum indicum]                                         |
| c50859.graph_c0 | 0.36126166    | 0.39778575    | 0.13927066    | 3.96053192     | 6.59324808     | 8.79533674     | 9.251E-07 | 3.409479  | up        | -                                                                                                         |

| #ID             | 0 h-1<br>FPKM | 0 h-2<br>FPKM | 0 h-3<br>FPKM | 48 h-1<br>FPKM | 48 h-2<br>FPKM | 48 h-3<br>FPKM | FDR       | log2FC    | regulated | nr_annotation                                                                                     |
|-----------------|---------------|---------------|---------------|----------------|----------------|----------------|-----------|-----------|-----------|---------------------------------------------------------------------------------------------------|
| c50868.graph_c0 | 5.20226469    | 3.85738813    | 5.44713163    | 21.655748      | 20.4970383     | 23.6915833     | 0.003857  | 1.163181  | up        | hypothetical protein PHAVU_008G011200g [Phaseolus vulgaris]                                       |
| c50871.graph_c0 | 1.21390322    | 1.57515395    | 2.13765952    | 17.9760683     | 18.1658856     | 21.7812062     | 6.31E-22  | 2.531097  | up        | PREDICTED: protein arginine N-methyltransferase PRMT10 isoform X1 [Sesamum indicum]               |
| c50873.graph_c0 | 25.2996934    | 27.9379269    | 24.7187628    | 22.8267746     | 19.5965963     | 17.5459167     | 2.716E-19 | -1.391292 | down      | PREDICTED: trihelix transcription factor ASIL2 [Sesamum indicum]                                  |
| c50874.graph_c0 | 7.45218227    | 11.7222985    | 14.1365156    | 142.049148     | 152.561876     | 96.141254      | 2.665E-10 | 2.531485  | up        | hypothetical protein JCGZ_21814 [Jatropha curcas]                                                 |
| c50879.graph_c0 | 5.33924024    | 4.9882809     | 4.80279457    | 0.32792376     | 0              | 0              | 1.726E-18 | -6.487391 | down      | -                                                                                                 |
| c50880.graph_c0 | 1.48593803    | 1.40629364    | 1.21512949    | 10.5284164     | 13.0520623     | 14.9934239     | 2.488E-19 | 2.210877  | up        | PREDICTED: peptide-N4-(N-acetyl-beta-glucosaminyl)asparagine amidase A-like [Sesamum indicum]     |
| c50885.graph_c0 | 0.05306334    | 0             | 0.06818849    | 1.07547899     | 0.93218693     | 1.30493828     | 3.156E-08 | 3.745213  | up        | hypothetical protein MIMGU_mgv1a010676mg [Erythranthe guttata]                                    |
| c50890.graph_c0 | 3.04018261    | 3.62846283    | 3.75649521    | 26.284567      | 25.4487888     | 28.1804418     | 8.477E-09 | 1.919182  | up        | PREDICTED: ADP-ribosylation factor GTPase-activating protein AGD3-like [Sesamum indicum]          |
| c50891.graph_c0 | 0             | 0.0534082     | 0             | 8.35616203     | 12.4974218     | 11.8526835     | 2.092E-30 | 8.245643  | up        | PREDICTED: annexin D4 [Sesamum indicum]                                                           |
| c50892.graph_c0 | 0.84437723    | 1.2960082     | 0.86804653    | 32.9827639     | 42.4129504     | 41.0685532     | 9.347E-62 | 4.254358  | up        | PREDICTED: endo-1,3;1,4-beta-D-glucanase-like [Sesamum indicum]                                   |
| c50896.graph_c0 | 0.27197032    | 0.11667543    | 0.17474632    | 20.8499053     | 24.0028672     | 23.3613396     | 1.34E-124 | 5.902351  | up        | PREDICTED: WEB family protein At3g02930, chloroplastic-like [Sesamum indicum]                     |
| c50897.graph_c0 | 1.38358736    | 1.84663042    | 1.64626346    | 0.28325576     | 0.60015026     | 0.71411127     | 2.088E-07 | -2.641352 | down      | PREDICTED: RING-H2 finger protein ATL16-like [Sesamum indicum]                                    |
| c50899.graph_c0 | 0             | 0             | 0.06193044    | 6.39344366     | 11.9469576     | 8.84931868     | 1.948E-18 | 7.719086  | up        | PREDICTED: annexin D1-like [Sesamum indicum]                                                      |
| c50901.graph_c0 | 0             | 0             | 0.12787867    | 3.02538198     | 4.07912318     | 5.87338187     | 2.648E-11 | 5.607325  | up        | hypothetical protein MIMGU_mgv1a012192mg [Erythranthe guttata]                                    |
| c50904.graph_c0 | 3.83982119    | 1.38371983    | 1.77635601    | 18.3949674     | 12.5917534     | 15.1086751     | 0.0001851 | 1.71344   | up        | hypothetical protein EMIHUDRAFT_447448 [Emiliania huxleyi CCMP1516]                               |
| c50905.graph_c0 | 0             | 0.18186599    | 0.15564747    | 1.11586138     | 1.95049771     | 2.38292818     | 3.507E-05 | 2.976011  | up        | PREDICTED: fasciclin-like arabinogalactan protein 12 [Sesamum indicum]                            |
| c50906.graph_c0 | 0.02424172    | 0             | 0             | 3.21595957     | 6.50626932     | 10.0750106     | 6.759E-09 | 8.663546  | up        | PREDICTED: probable LRR receptor-like serine/threonine-protein kinase At4g26540 [Sesamum indicum] |
| c50907.graph_c0 | 563.298612    | 588.693763    | 568.599103    | 191.91551      | 122.431197     | 101.588082     | 1.004E-73 | -3.054968 | down      | hypothetical protein MIMGU_mgv1a008386mg [Erythranthe guttata]                                    |
| c50912.graph_c0 | 0             | 0             | 0             | 14.9383721     | 6.36653774     | 5.5001684      | 1.39E-05  | Inf       | up        | PREDICTED: uncharacterized protein LOC105157276 [Sesamum indicum]                                 |
| c50914.graph_c0 | 0             | 0             | 0             | 20.1452717     | 16.512695      | 9.56007554     | 1.069E-15 | Inf       | up        | PREDICTED: probable trehalose-phosphate phosphatase H [Sesamum indicum]                           |
| c50915.graph_c0 | 2308.10462    | 2107.65866    | 1983.73098    | 450.082801     | 327.923969     | 354.106913     | 1.976E-98 | -3.509323 | down      | hypothetical protein NitaMp027 [Nicotiana tabacum]                                                |
| c50917.graph_c0 | 7.37066986    | 4.01693859    | 4.84104132    | 0              | 0              | 0              | 3.859E-24 | -Inf      | down      | --                                                                                                |

| #ID             | 0 h-1<br>FPKM | 0 h-2<br>FPKM | 0 h-3<br>FPKM | 48 h-1<br>FPKM | 48 h-2<br>FPKM | 48 h-3<br>FPKM | FDR       | log2FC    | regulated | nr_annotation                                                                 |
|-----------------|---------------|---------------|---------------|----------------|----------------|----------------|-----------|-----------|-----------|-------------------------------------------------------------------------------|
| c50919.graph_c0 | 0             | 0             | 0             | 1.32187416     | 3.01078558     | 1.8231033      | 1.395E-06 | Inf       | up        | hypothetical protein AOL_s00079g69 [Arthrobotrys oligospora ATCC 24927]       |
| c50920.graph_c0 | 0             | 0.05184221    | 0             | 6.63205819     | 13.7484483     | 15.1986852     | 1.322E-13 | 8.404324  | up        | PREDICTED: DNA-damage-repair/toleration protein DRT100-like [Sesamum indicum] |
| c50921.graph_c0 | 0.58956557    | 0.46591257    | 0.43861926    | 10.6342319     | 10.7811339     | 13.0996557     | 3.987E-28 | 3.513003  | up        | PREDICTED: glucan endo-1,3-beta-glucosidase 2-like [Sesamum indicum]          |
| c50924.graph_c0 | 68.1932181    | 64.159336     | 65.1342588    | 46.0665473     | 47.3985588     | 44.9973602     | 2.218E-27 | -1.529561 | down      | PREDICTED: KH domain-containing protein At4g18375-like [Sesamum indicum]      |
| c50925.graph_c0 | 0             | 0             | 0.11676593    | 2.59505176     | 7.00587971     | 4.24569363     | 4.694E-06 | 5.825957  | up        | PREDICTED: transcription factor KAZZ-like [Sesamum indicum]                   |
| c50926.graph_c0 | 11.1841858    | 12.0510833    | 9.52038623    | 1.96884104     | 2.95481016     | 4.02928471     | 1.898E-39 | -2.895984 | down      | PREDICTED: putative nuclease HAKB1 [Sesamum indicum]                          |
| c50929.graph_c0 | 0.03548831    | 0.07104769    | 0.04560388    | 1.30776586     | 1.0737         | 0.78545849     | 3.982E-07 | 3.369147  | up        | PREDICTED: protein HOTHEAD [Sesamum indicum]                                  |
| c50930.graph_c0 | 0.06750493    | 0.06757253    | 0             | 8.20907321     | 11.1341779     | 12.6719995     | 1.33E-23  | 6.881454  | up        | PREDICTED: NADPH:quinone oxidoreductase [Sesamum indicum]                     |
| c50933.graph_c0 | 0             | 0.08524384    | 0.43772853    | 1.9613407      | 2.32713897     | 1.53576647     | 2.516E-05 | 2.434029  | up        | hypothetical protein MIMGU_mgv1a0012201mg, partial [Erythranthe guttata]      |
| c50941.graph_c0 | 8.25200183    | 8.26026496    | 6.47635949    | 35.9195084     | 34.4849546     | 39.1794187     | 1.118E-10 | 1.237934  | up        | PREDICTED: protein TIC21, chloroplastic [Sesamum indicum]                     |
| c50942.graph_c0 | 108.411885    | 114.415537    | 109.367658    | 34.7699505     | 59.0217984     | 74.4902068     | 6.209E-44 | -2.009016 | down      | PREDICTED: uncharacterized protein LOC105163758 [Sesamum indicum]             |
| c50943.graph_c0 | 0.61806021    | 0.30933955    | 0.89351082    | 4.69752836     | 3.16683926     | 3.86317851     | 0.0010039 | 1.669038  | up        | hypothetical protein MIMGU_mgv1a007960mg [Erythranthe guttata]                |
| c50945.graph_c0 | 494.747321    | 464.483328    | 481.162691    | 123.721798     | 145.190609     | 99.2914644     | 5.731E-93 | -2.985727 | down      | hypoteucal protein FOR1K_0011511140g [Populus trichocarpa]                    |
| c50948.graph_c0 | 2.92707014    | 2.74687609    | 2.40964753    | 11.5869872     | 17.051102      | 13.9091698     | 6.434E-07 | 1.374657  | up        | hypothetical protein MIMGU_mgv1a009797mg [Erythranthe guttata]                |
| c50952.graph_c0 | 5.13309968    | 4.71005306    | 4.39749088    | 39.6049247     | 38.6167853     | 35.4155483     | 1.803E-07 | 1.981446  | up        | -                                                                             |
| c50955.graph_c0 | 7.16955544    | 6.45906119    | 6.26495056    | 7.66187204     | 5.17797417     | 3.29120094     | 0.0017877 | -1.30716  | down      | -                                                                             |
| c50957.graph_c0 | 6.70870104    | 6.41977142    | 5.80151742    | 542.095314     | 526.18702      | 454.16458      | 3.02E-108 | 5.315264  | up        | PREDICTED: basic 7S globulin-like [Sesamum indicum]                           |
| c50959.graph_c0 | 0.15850677    | 0.23799823    | 0             | 11.3170748     | 11.8343708     | 11.62907       | 1.314E-19 | 5.452184  | up        | hypothetical protein JCGZ_13997 [Jatropha curcas]                             |
| c50962.graph_c0 | 4.24086537    | 4.51043145    | 4.76846991    | 22.5871228     | 25.2217404     | 30.671909      | 5.971E-14 | 1.515232  | up        | PREDICTED: adenylyl-sulfate kinase 3-like isoform X2 [Sesamum indicum]        |
| c50965.graph_c0 | 91.1674743    | 90.4654259    | 90.8650201    | 30.620431      | 46.5066553     | 56.8265315     | 1.161E-44 | -2.050643 | down      | PREDICTED: probable ribose-5-phosphate isomerase 1 [Sesamum indicum]          |
| c50966.graph_c0 | 0.85831962    | 1.21295873    | 0.51904692    | 10.4656768     | 11.6291523     | 14.3202422     | 2.232E-14 | 2.798234  | up        | hypothetical protein MIMGU_mgv1a009312mg [Erythranthe guttata]                |
| c50969.graph_c0 | 12.3235742    | 12.9425987    | 8.56716827    | 4.65298375     | 9.4642024      | 7.28674665     | 3.271E-05 | -1.68488  | down      | -                                                                             |
| c50970.graph_c0 | 0.18549034    | 0.18567608    | 0.11918122    | 3.84493058     | 5.06891806     | 4.40954165     | 1.633E-08 | 3.746844  | up        | PREDICTED: putative B3 domain-containing protein At5g66980 [Sesamum indicum]  |

| #ID             | 0 h-1<br>FPKM | 0 h-2<br>FPKM | 0 h-3<br>FPKM | 48 h-1<br>FPKM | 48 h-2<br>FPKM | 48 h-3<br>FPKM | FDR       | log2FC    | regulated | nr_annotation                                                                               |
|-----------------|---------------|---------------|---------------|----------------|----------------|----------------|-----------|-----------|-----------|---------------------------------------------------------------------------------------------|
| c50974.graph_c0 | 0.29301845    | 0.58662373    | 0.37654031    | 1.77394208     | 2.65549944     | 3.53433975     | 0.0011775 | 1.638494  | up        | PREDICTED: serine/threonine-protein kinase CDL1-like [Sesamum indicum]                      |
| c50975.graph_c0 | 0.13353911    | 0.08911522    | 0.17160304    | 3.93679799     | 3.25825009     | 2.73667124     | 7.514E-10 | 3.638139  | up        | PREDICTED: putative cyclin-A3-1 [Sesamum indicum]                                           |
| c50977.graph_c0 | 15.0390245    | 16.7979375    | 14.6656339    | 170.35341      | 185.222525     | 159.360964     | 1.994E-65 | 2.451791  | up        | hypothetical protein MIMGU_mgv1a020088mg [Erythranthe guttata]                              |
| c50978.graph_c0 | 2.86038043    | 1.82206479    | 1.44800386    | 0.87838967     | 1.35352342     | 1.49211844     | 0.0006046 | -1.739264 | down      | -                                                                                           |
| c50981.graph_c0 | 21.0499929    | 11.1748953    | 12.5615121    | 0              | 0              | 0              | 3.533E-24 | -Inf      | down      | cytochrome b (mitochondrion) [Gracilaria salicornia]                                        |
| c50982.graph_c0 | 0.63792154    | 0.47892024    | 0.40987722    | 11.9987715     | 20.960581      | 21.1785603     | 2.819E-14 | 4.124647  | up        | PREDICTED: hevamine-A [Sesamum indicum]                                                     |
| c50984.graph_c0 | 0.03940448    | 0.09860984    | 0.15190895    | 6.80662068     | 6.99927278     | 6.33105104     | 3.818E-38 | 5.09052   | up        | PREDICTED: putative late blight resistance protein homolog R1A-10 [Sesamum indicum]         |
| c50986.graph_c0 | 0             | 0             | 0             | 3.10411701     | 4.23842808     | 4.29648279     | 2.007E-13 | Inf       | up        | PREDICTED: polyadenylate-binding protein-interacting protein 8-like [Sesamum indicum]       |
| c50990.graph_c0 | 0             | 0             | 0             | 2.09949412     | 2.50217938     | 1.4594666      | 2.629E-11 | Inf       | up        | actin [Pseudozyma antarctica]                                                               |
| c50996.graph_c0 | 11.5997631    | 12.7790032    | 14.239958     | 0.89551327     | 0.63245848     | 0.69057935     | 4.63E-54  | -5.134631 | down      | SLF-interacting SKP1-like protein 1, partial [Antirrhinum hispanicum]                       |
| c50997.graph_c0 | 29.8601201    | 24.7167477    | 23.6131917    | 23.9822838     | 18.8679301     | 16.6320952     | 4.463E-07 | -1.404215 | down      | hypothetical protein MIMGU_mgv1a007364mg [Erythranthe guttata]                              |
| c50999.graph_c0 | 1.45655389    | 1.12154801    | 1.0798439     | 15.2250912     | 13.4500609     | 13.7768081     | 2.274E-13 | 2.523878  | up        | PREDICTED: probable F-actin-capping protein subunit beta isoform X2 [Sesamum indicum]       |
| c51000.graph_c0 | 0             | 0             | 0             | 3.31972267     | 3.03727405     | 3.22240284     | 1.987E-16 | Inf       | up        | PREDICTED: polygalacturonase-like [Sesamum indicum]                                         |
| c51004.graph_c0 | 6.4841629     | 6.62875487    | 6.91412417    | 61.0073239     | 75.1322147     | 82.6699321     | 1.477E-24 | 2.427053  | up        | putative. proteolipid subunit of vacuolar H+ ATPase, partial [Zea mays]                     |
| c51005.graph_c0 | 0.12585047    | 0.33593732    | 0.05390761    | 1.4299472      | 2.21087043     | 2.37277651     | 1.683E-05 | 2.527364  | up        | PREDICTED: protein BRANCHLESS TRICHOME [Sesamum indicum]                                    |
| c51010.graph_c0 | 0.04377754    | 0             | 0             | 1.04859894     | 0.85451033     | 0.86126495     | 3.121E-09 | 4.988536  | up        | PREDICTED: uncharacterized protein LOC105169592 [Sesamum indicum]                           |
| c51013.graph_c0 | 0             | 0             | 0             | 4.26363112     | 7.04620828     | 10.0534463     | 5.518E-12 | Inf       | up        | PREDICTED: putative pectate lyase 2 [Sesamum indicum]                                       |
| c51016.graph_c0 | 0             | 0.24001766    | 0.36974839    | 3.18094165     | 3.22941272     | 3.85246542     | 2.495E-08 | 3.038702  | up        | PREDICTED: cell wall / vacuolar inhibitor of fructosidase 1-like [Malus domestica]          |
| c51018.graph_c0 | 8.81333327    | 7.81710246    | 7.1680267     | 3.49443283     | 1.52432324     | 0.91450745     | 5.937E-13 | -2.998044 | down      | PREDICTED: pathogenesis-related genes transcriptional activator PTI6-like [Sesamum indicum] |
| c51019.graph_c0 | 2.0326933     | 2.03472874    | 1.52132794    | 14.3844188     | 17.8328067     | 16.1866462     | 2.499E-25 | 2.09676   | up        | PREDICTED: two-component response regulator ARR12-like [Sesamum indicum]                    |
| c51021.graph_c0 | 0.67065068    | 0.44754815    | 0.71817722    | 7.41416574     | 10.2543681     | 11.6365163     | 1.543E-08 | 2.969784  | up        | -                                                                                           |
| c51025.graph_c0 | 1.9914071     | 1.76465023    | 1.92976558    | 0.96242051     | 2.07099717     | 1.15072836     | 0.000272  | -1.470298 | down      | hypothetical protein MIMGU_mgv1a027162mg [Erythranthe guttata]                              |

| #ID             | 0 h-1<br>FPKM | 0 h-2<br>FPKM | 0 h-3<br>FPKM | 48 h-1<br>FPKM | 48 h-2<br>FPKM | 48 h-3<br>FPKM | FDR       | log2FC    | regulated | nr_annotation                                                                             |
|-----------------|---------------|---------------|---------------|----------------|----------------|----------------|-----------|-----------|-----------|-------------------------------------------------------------------------------------------|
| c51026.graph_c0 | 0.37198926    | 0.22341705    | 0             | 27.8958429     | 40.3711505     | 51.6556649     | 1.166E-21 | 6.646023  | up        | PREDICTED: uncharacterized protein LOC105161197 [Sesamum indicum]                         |
| c51029.graph_c0 | 3.3684447     | 3.73965234    | 4.87949559    | 0.14105595     | 0.29886336     | 0.15061289     | 2.48E-27  | -5.374308 | down      | PREDICTED: uncharacterized protein LOC104606632 [Nelumbo nucifera]                        |
| c51031.graph_c0 | 0             | 0             | 0.05980424    | 3.38709369     | 5.04166926     | 5.64613555     | 8.325E-18 | 6.820953  | up        | PREDICTED: uncharacterized protein C594.04c [Sesamum indicum]                             |
| c51035.graph_c0 | 0.77831392    | 1.16863993    | 0.5715224     | 16.6966384     | 10.41751       | 9.66132674     | 8.796E-06 | 2.865593  | up        | PREDICTED: uncharacterized protein LOC105158187 [Sesamum indicum]                         |
| c51036.graph_c0 | 0.20898547    | 0.17432895    | 0.0895182     | 2.14993001     | 3.26341276     | 4.85386739     | 6.993E-06 | 3.420655  | up        | PREDICTED: beta-amyrin 28-oxidase-like [Sesamum indicum]                                  |
| c51037.graph_c0 | 13.7724466    | 16.1810301    | 17.6150493    | 86.4933641     | 92.2602867     | 103.357084     | 7.212E-24 | 1.546603  | up        | unnamed protein product [Coffea canephora]                                                |
| c51043.graph_c0 | 5.25502725    | 6.1185471     | 6.25533463    | 39.3417202     | 35.6582579     | 35.7315396     | 6.116E-25 | 1.634267  | up        | PREDICTED: probable acyl-activating enzyme 1, peroxisomal [Sesamum indicum]               |
| c51044.graph_c0 | 30.9481898    | 31.6448481    | 38.0605403    | 5.37241319     | 0              | 0.08386563     | 2.483E-63 | -5.169123 | down      | PREDICTED: uncharacterized protein LOC104420277 [Eucalyptus grandis]                      |
| c51046.graph_c1 | 0.24642126    | 0.49333603    | 0.94998324    | 28.6044369     | 33.669925      | 26.4620582     | 6.321E-16 | 4.683902  | up        | -                                                                                         |
| c51047.graph_c0 | 0             | 0             | 0             | 4.55394131     | 4.11966849     | 6.92038852     | 1.737E-15 | Inf       | up        | PREDICTED: uncharacterized protein LOC105160227 isoform X1 [Sesamum indicum]              |
| c51050.graph_c0 | 0.30227914    | 0.33620202    | 0.30212051    | 66.8659635     | 74.1143249     | 80.8618649     | 1.13E-199 | 6.862133  | up        | PREDICTED: protein TRANSPARENT TESTA 12-like [Sesamum indicum]                            |
| c51051.graph_c0 | 0.63924203    | 0.2399558     | 0.30804425    | 3.31262693     | 3.74328166     | 3.34056293     | 0.0001842 | 2.116726  | up        | PREDICTED: uncharacterized protein LOC105159339 isoform X2 [Sesamum indicum]              |
| c51053.graph_c0 | 7.72952234    | 7.57935897    | 5.47314368    | 0              | 0.15395454     | 0              | 1.635E-24 | -8.12598  | down      | hypothetical protein MIMGU_mgv1a015250mg [Erythranthe guttata]                            |
| c51054.graph_c0 | 34.2469858    | 20.1978457    | 17.9680625    | 0              | 0              | 0              | 3.001E-29 | -Inf      | down      | uncharacterized protein LOC100274422 [Zea mays]                                           |
| c51055.graph_c0 | 0.25744471    | 0.04295042    | 0.11027555    | 1.38352        | 2.21944569     | 2.46209556     | 1.646E-06 | 2.863753  | up        | PREDICTED: uncharacterized protein PB18E9.04c [Sesamum indicum]                           |
| c51058.graph_c0 | 53.4579408    | 48.0402232    | 48.1382925    | 25.2999552     | 31.8764442     | 29.5603293     | 2.556E-31 | -1.807213 | down      | PREDICTED: heme-binding-like protein At3g10130, chloroplastic [Sesamum indicum]           |
| c51059.graph_c0 | 7.69323132    | 9.64732507    | 6.73558927    | 2.3365406      | 2.2277533      | 2.70275171     | 1.745E-13 | -2.743976 | down      | PREDICTED: E3 ubiquitin-protein ligase RHA1B-like [Sesamum indicum]                       |
| c51060.graph_c0 | 0.33298763    | 0.26665685    | 0.21395114    | 4.29477894     | 7.9946442      | 9.17152433     | 2.051E-08 | 3.696341  | up        | PREDICTED: PTII-like tyrosine-protein kinase At3g15890 [Sesamum indicum]                  |
| c51061.graph_c0 | 9.63089819    | 10.5843714    | 9.52006575    | 0.99273976     | 1.24887878     | 0.3312502      | 6.068E-37 | -4.54514  | down      | -                                                                                         |
| c51063.graph_c0 | 6.07591027    | 4.18137113    | 4.3918792     | 1.04953591     | 1.55659844     | 2.36580587     | 1.253E-09 | -2.583844 | down      | -                                                                                         |
| c51066.graph_c0 | 0.48968106    | 0.14004897    | 0.26968267    | 10.3114545     | 10.7530523     | 12.5010331     | 6.929E-30 | 4.205959  | up        | PREDICTED: guanine nucleotide-binding protein subunit beta-like protein [Sesamum indicum] |

| #ID             | 0 h-1<br>FPKM | 0 h-2<br>FPKM | 0 h-3<br>FPKM | 48 h-1<br>FPKM | 48 h-2<br>FPKM | 48 h-3<br>FPKM | FDR       | log2FC    | regulated | nr_annotation                                                                                 |
|-----------------|---------------|---------------|---------------|----------------|----------------|----------------|-----------|-----------|-----------|-----------------------------------------------------------------------------------------------|
| c51067.graph_c0 | 0.4224885     | 0.53568798    | 0.61530305    | 4.69663587     | 5.85516548     | 5.40273467     | 8.375E-10 | 2.317774  | up        | PREDICTED: spindle pole body protein pcp1 [Sesamum indicum]                                   |
| c51068.graph_c0 | 0             | 0             | 0             | 1.98732149     | 3.47836494     | 1.92207252     | 8.063E-08 | Inf       | up        | PREDICTED: probable ADP-ribosylation factor GTPase-activating protein AGD11 [Sesamum indicum] |
| c51070.graph_c0 | 10.0991523    | 7.37703126    | 8.41803926    | 50.0404206     | 49.815069      | 56.8317538     | 6.333E-06 | 1.579718  | up        | PREDICTED: ER membrane protein complex subunit 4 [Sesamum indicum]                            |
| c51071.graph_c0 | 0.59232435    | 0.75462224    | 0.4843747     | 3.52216689     | 5.36047171     | 5.29690635     | 6.169E-05 | 1.930947  | up        | PREDICTED: protein disulfide-isomerase SCO2 [Sesamum indicum]                                 |
| c51073.graph_c0 | 3.54989601    | 1.85748559    | 2.90293622    | 0.44596306     | 0.47244378     | 0.85976637     | 2.265E-08 | -3.247691 | down      | -                                                                                             |
| c51074.graph_c0 | 0             | 0.27968341    | 0             | 5.01939444     | 7.63529815     | 6.41304389     | 6.252E-14 | 5.078968  | up        | -                                                                                             |
| c51078.graph_c0 | 19.5028141    | 15.5591607    | 12.6251617    | 3.24221313     | 2.28982111     | 3.84653566     | 1.479E-19 | -3.357757 | down      | Dof zinc finger DOF5.2 -like protein [Gossypium arboreum]                                     |
| c51082.graph_c0 | 2.21896047    | 1.91576984    | 2.49502055    | 10.4256807     | 10.2055605     | 10.3226113     | 5.939E-07 | 1.204107  | up        | hypothetical protein MIMGU_mgv1a003778mg [Erythranthe guttata]                                |
| c51083.graph_c0 | 1.39590849    | 0.23288438    | 0.89689884    | 5.14400781     | 7.03887619     | 7.24708643     | 0.0006024 | 1.921298  | up        | -                                                                                             |
| c51084.graph_c0 | 20.8119302    | 20.2289218    | 15.891454     | 11.809646      | 14.4243178     | 11.6207798     | 4.651E-08 | -1.605768 | down      | PREDICTED: 5'-adenylylsulfate reductase-like 5 isoform X2 [Sesamum indicum]                   |
| c51086.graph_c0 | 3.83020153    | 3.91391267    | 3.07622538    | 18.6723416     | 13.7844546     | 14.7830134     | 0.0008488 | 1.116741  | up        | hypothetical protein MIMGU_mgv1a006570mg [Erythranthe guttata]                                |
| c51087.graph_c0 | 0.33009987    | 0.49564563    | 0.70698568    | 15.712326      | 15.0881628     | 20.1593153     | 2.662E-28 | 4.029374  | up        | PREDICTED: protein CURVATURE THYLAKOID 1D, chloroplastic [Sesamum indicum]                    |
| c51088.graph_c0 | 1.01111028    | 0.70848593    | 0.5197267     | 96.9692274     | 73.6161818     | 76.6680478     | 2.366E-37 | 5.780206  | up        | PREDICTED: indole-3-acetic acid-induced protein ARG7-like [Nicotiana sylvestris]              |
| c51089.graph_c0 | 0.8568719     | 0.31600576    | 0.75339401    | 7.85251516     | 9.15506789     | 12.088828      | 9.701E-14 | 2.893075  | up        | PREDICTED: chloroplast stem-loop binding protein of 41 kDa a, chloroplastic [Sesamum indicum] |
| c51090.graph_c0 | 13.1168316    | 15.8465108    | 15.6931894    | 9.68809926     | 17.7677634     | 17.6115953     | 0.0003519 | -1.015771 | down      | hypothetical protein MIMGU_mgv1a017353mg [Erythranthe guttata]                                |
| c51091.graph_c0 | 27.2776708    | 26.914914     | 19.5294656    | 131.034841     | 127.40603      | 117.232885     | 1.04E-06  | 1.336484  | up        | 60S ribosomal protein L29-1 [Medicago truncatula]                                             |
| c51094.graph_c0 | 0             | 0             | 0             | 7.49862256     | 12.1672107     | 10.8951592     | 2.503E-29 | Inf       | up        | PREDICTED: peroxidase 16 [Sesamum indicum]                                                    |
| c51096.graph_c0 | 0             | 0             | 0             | 2.85254475     | 4.68398417     | 3.0458126      | 2.951E-11 | Inf       | up        | predicted protein [Hordeum vulgare subsp. vulgare]                                            |
| c51097.graph_c0 | 2.50639066    | 1.69520299    | 1.82802799    | 59.1616196     | 56.3277712     | 65.6354792     | 1.699E-69 | 3.893198  | up        | PREDICTED: 30S ribosomal protein S20, chloroplastic isoform X1 [Sesamum indicum]              |
| c51098.graph_c0 | 20.595011     | 17.8920236    | 19.687679     | 14.6543041     | 15.6470198     | 17.0540471     | 9.03E-15  | -1.316221 | down      | PREDICTED: pre-mRNA-splicing factor 58 [Sesamum indicum]                                      |
| c51099.graph_c0 | 0.33070543    | 0.66207316    | 0.42496957    | 4.11301008     | 3.06620272     | 4.33745971     | 0.0003444 | 2.007897  | up        | -                                                                                             |
| c51100.graph_c0 | 0.03555325    | 0             | 0             | 7.7954454      | 12.0405051     | 13.2023623     | 2.844E-28 | 8.855514  | up        | hypothetical protein MIMGU_mgv1a004964mg [Erythranthe guttata]                                |

| #ID             | 0 h-1<br>FPKM | 0 h-2<br>FPKM | 0 h-3<br>FPKM | 48 h-1<br>FPKM | 48 h-2<br>FPKM | 48 h-3<br>FPKM | FDR       | log2FC    | regulated | nr_annotation                                                                                      |
|-----------------|---------------|---------------|---------------|----------------|----------------|----------------|-----------|-----------|-----------|----------------------------------------------------------------------------------------------------|
| c51101.graph_c0 | 0             | 0.42199293    | 0.27086758    | 9.70946279     | 12.1374782     | 17.6244201     | 2.531E-10 | 4.802134  | up        | PREDICTED: chlorophyll a-b binding protein 151, chloroplastic-like [Pyrus x bretschneideri]        |
| c51103.graph_c0 | 5.4975839     | 2.82209687    | 6.15889336    | 0              | 0              | 0              | 6.976E-13 | -Inf      | down      | 40S ribosomal protein S16 [Arabidopsis lyrata subsp. lyrata]                                       |
| c51104.graph_c0 | 118.04178     | 114.260312    | 116.895156    | 6.101361       | 6.74881328     | 3.83220306     | 2.59E-203 | -5.403267 | down      | -                                                                                                  |
| c51106.graph_c0 | 0.08227375    | 0             | 0             | 8.03437043     | 5.86165294     | 7.28382005     | 4.536E-16 | 7.016339  | up        | PREDICTED: transcription factor HEU2-like [Sesamum indicum]                                        |
| c51110.graph_c0 | 8.75421562    | 4.8196399     | 6.56221631    | 317.355957     | 330.931453     | 367.538378     | 3.36E-146 | 4.63899   | up        | beta-tubulin [Deschampsia antarctica]                                                              |
| c51113.graph_c0 | 0.68905537    | 0.60352718    | 0.71943904    | 3.01531306     | 4.70747578     | 4.16572206     | 0.0006453 | 1.537204  | up        | PREDICTED: metacaspase-1-like [Sesamum indicum]                                                    |
| c51116.graph_c0 | 6.77944461    | 3.98322383    | 5.68164439    | 0              | 0              | 0              | 3.205E-23 | -Inf      | down      | ribosomal protein L27                                                                              |
| c51117.graph_c0 | 6.73336377    | 2.77533785    | 4.07183013    | 0              | 0              | 0              | 1.058E-10 | -Inf      | down      | hypothetical protein MVLG_03147 [Microbotryum violaceum p1A1 Lamole]                               |
| c51118.graph_c0 | 0.36927205    | 0.36964182    | 0.42707629    | 3.47001451     | 4.43289541     | 5.99357267     | 1.433E-08 | 2.549394  | up        | PREDICTED: beta-1,4-mannosyl-glycoprotein 4-beta-N-acetylglucosaminyltransferase [Sesamum indicum] |
| c51119.graph_c0 | 4.64115492    | 3.98211629    | 2.98203391    | 0.71262244     | 0.43139261     | 0.54350328     | 1.344E-12 | -3.787059 | down      | -                                                                                                  |
| c51120.graph_c0 | 10.8311624    | 12.2338875    | 8.36989222    | 4.65207941     | 5.78541213     | 5.45919852     | 3.861E-12 | -2.001642 | down      | --                                                                                                 |
| c51125.graph_c0 | 0.32789691    | 0.45951535    | 0.19663491    | 9.98877948     | 8.32044608     | 7.20354492     | 5.763E-20 | 3.689697  | up        | PREDICTED: phosphate transporter PHO1 homolog 9-like [Sesamum indicum]                             |
| c51126.graph_c0 | 14.5385011    | 13.2796666    | 12.610721     | 5.27381486     | 6.5624696      | 7.96998629     | 1.595E-12 | -2.051094 | down      | PREDICTED: suppressor of glycerol defect protein 1 isoform X2 [Sesamum indicum]                    |
| c51129.graph_c0 | 2.18549819    | 3.37528796    | 3.530625      | 13.5187005     | 14.6870774     | 20.1163463     | 5.166E-06 | 1.38534   | up        | PREDICTED: UPF0483 protein AGAP003155 [Sesamum indicum]                                            |
| c51131.graph_c0 | 0             | 0             | 0             | 3.5083416      | 11.5723356     | 14.7571332     | 1.401E-06 | Inf       | up        | hypothetical protein CISIN_1g026722mg [Citrus sinensis]                                            |
| c51132.graph_c0 | 3.72277151    | 3.07841247    | 3.0679415     | 83.8402739     | 98.8891883     | 109.728186     | 3.043E-77 | 3.869301  | up        | PREDICTED: 24-methylenesterol C-methyltransferase 2-like [Sesamum indicum]                         |
| c51134.graph_c0 | 222.233975    | 203.046088    | 211.104814    | 23.4844732     | 21.6893425     | 22.3251528     | 1.16E-137 | -4.252825 | down      | PREDICTED: uncharacterized protein LOC105179155 [Sesamum indicum]                                  |
| c51135.graph_c0 | 0             | 0             | 0             | 3.16555715     | 13.0148668     | 10.9985183     | 1.097E-06 | Inf       | up        | PREDICTED: non-specific lipid transfer protein GPI-anchored 2-like [Eucalyptus grandis]            |
| c51137.graph_c0 | 0.08265115    | 0             | 0.053105      | 2.7792426      | 3.18626537     | 0.81302576     | 0.0004849 | 4.629166  | up        | hypothetical protein MIMGU_mgv1a008689mg [Erythranthe guttata]                                     |
| c51138.graph_c0 | 19.295474     | 16.1705264    | 15.9152178    | 0.41340114     | 0.43794838     | 0.29427348     | 8.48E-65  | -6.501329 | down      | hypothetical protein MIMGU_mgv1a008111mg [Erythranthe guttata]                                     |
| c51144.graph_c0 | 2.050445      | 1.43134744    | 2.66957278    | 0.57167217     | 1.1585723      | 2.05679793     | 0.0026919 | -1.736333 | down      | PREDICTED: UPF0392 protein RCOM_0530710-like [Sesamum indicum]                                     |
| c51145.graph_c0 | 2.88328481    | 2.02032039    | 1.48205405    | 19.5678559     | 24.7631648     | 25.3685886     | 4.384E-12 | 2.431915  | up        | PREDICTED: proline-rich protein 3 [Sesamum indicum]                                                |
| c51147.graph_c0 | 0             | 0             | 0             | 0.90734652     | 1.5177215      | 1.10479676     | 2.951E-11 | Inf       | up        | -                                                                                                  |
| c51148.graph_c0 | 0.03963936    | 0.0793581     | 0.05093814    | 13.7309039     | 17.3703623     | 17.6766372     | 1.266E-54 | 7.143727  | up        | PREDICTED: GDSL esterase/lipase 7 [Sesamum indicum]                                                |



| #ID             | 0 h-1<br>FPKM | 0 h-2<br>FPKM | 0 h-3<br>FPKM | 48 h-1<br>FPKM | 48 h-2<br>FPKM | 48 h-3<br>FPKM | FDR       | log2FC    | regulated | nr_annotation                                                                             |
|-----------------|---------------|---------------|---------------|----------------|----------------|----------------|-----------|-----------|-----------|-------------------------------------------------------------------------------------------|
| c51153.graph_c0 | 7.0969408     | 8.28051375    | 6.33161554    | 5.74692189     | 4.19112939     | 4.18720398     | 6.953E-10 | -1.629239 | down      | hypothetical protein MIMGU_mgv1a020747mg<br>[Erythranthe guttata]                         |
| c51154.graph_c0 | 55.6563405    | 54.7886674    | 54.1343776    | 7.08207888     | 3.90135399     | 5.29333661     | 3.849E-41 | -4.345715 | down      | PREDICTED: heat stress transcription factor A-2-like<br>[Nicotiana sylvestris]            |
| c51158.graph_c0 | 2.81317387    | 1.95687499    | 1.47052466    | 17.6585603     | 18.8932438     | 25.7575245     | 7.814E-12 | 2.304029  | up        | hypothetical protein MIMGU_mgv1a009002mg<br>[Erythranthe guttata]                         |
| c51160.graph_c0 | 0             | 0             | 0             | 1.86638031     | 2.39661046     | 2.96911953     | 3.659E-12 | Inf       | up        | PREDICTED: expansin-B3-like [Sesamum indicum]                                             |
| c51161.graph_c0 | 3.24187499    | 3.24512123    | 3.28889819    | 43.1095984     | 45.6693922     | 56.6813037     | 1.69E-35  | 2.874896  | up        | PREDICTED: glyceraldehyde-3-phosphate dehydrogenase<br>A, chloroplastic [Sesamum indicum] |
| c51162.graph_c0 | 0             | 0             | 0.33868756    | 2.02342061     | 3.3439673      | 3.88892338     | 2.259E-07 | 3.712858  | up        | PREDICTED: dirigent protein 23-like [Sesamum indicum]                                     |
| c51164.graph_c0 | 30.5132635    | 29.6111823    | 21.2516288    | 27.5743428     | 16.4812939     | 11.7426637     | 1.505E-06 | -1.544702 | down      | PREDICTED: probable WRKY transcription factor 31<br>[Sesamum indicum]                     |
| c51166.graph_c0 | 0.50195686    | 0.25122975    | 0.80629305    | 2.89022126     | 3.5517332      | 2.98317373     | 0.0030594 | 1.567101  | up        | -                                                                                         |
| c51170.graph_c0 | 2.23454477    | 1.2340868     | 2.2773795     | 52.8849398     | 79.8640836     | 54.1309974     | 3.985E-20 | 3.998516  | up        | PREDICTED: CASP-like protein 1 [Sesamum indicum]                                          |
| c51172.graph_c0 | 75.4740889    | 80.4397044    | 66.5649364    | 30.8911214     | 38.2266496     | 38.1259958     | 2.029E-48 | -2.072578 | down      | PREDICTED: ethylene-responsive transcription factor<br>TINY-like [Sesamum indicum]        |
| c51176.graph_c0 | 88.2408922    | 86.9624552    | 72.5978651    | 2.6730861      | 1.66577094     | 1.67893831     | 1.72E-148 | -6.369546 | down      | -                                                                                         |
| c51177.graph_c0 | 0             | 0             | 0             | 73.5314125     | 132.842837     | 182.749351     | 8.095E-22 | Inf       | up        | PREDICTED: trans-resveratrol di-O-methyltransferase<br>[Vitis vinifera]                   |
| c51178.graph_c0 | 0.90265324    | 1.39008786    | 1.2491717     | 0.12793585     | 1.15202644     | 1.36603862     | 0.0052742 | -1.464356 | down      | -                                                                                         |
| c51180.graph_c0 | 1.01104823    | 1.16776227    | 0.79953046    | 5.1587644      | 6.60364479     | 7.84165579     | 0.0003733 | 1.698331  | up        | hypothetical protein MIMGU_mgv1a0076692mg, partial<br>[Erythranthe guttata]               |
| c51184.graph_c0 | 151.995192    | 113.692556    | 130.928683    | 3.07753592     | 4.48287969     | 2.73837296     | 7.565E-76 | -6.287999 | down      | hypothetical protein CARUB_v10018292mg, partial<br>[Capsella rubella]                     |
| c51186.graph_c0 | 0.13202674    | 0.26431789    | 0             | 10.5819531     | 9.92175639     | 10.8227106     | 2.154E-13 | 5.302513  | up        | PREDICTED: nucleobase-ascorbate transporter 12<br>[Sesamum indicum]                       |
| c51195.graph_c0 | 0             | 0             | 0             | 2.53106876     | 2.77073913     | 2.10198778     | 2.367E-11 | Inf       | up        | hypothetical protein MIMGU_mgv1a015662mg<br>[Erythranthe guttata]                         |
| c51201.graph_c0 | 56.3045362    | 54.2184416    | 45.9141218    | 40.4539761     | 32.9169752     | 24.6763007     | 8.226E-23 | -1.683006 | down      | PREDICTED: uncharacterized protein LOC105164312<br>[Sesamum indicum]                      |
| c51202.graph_c0 | 0.35552205    | 0.2588204     | 0.49839262    | 13.2203057     | 8.86372152     | 6.78247123     | 3.646E-07 | 3.685013  | up        | PREDICTED: U-box domain-containing protein 9-like<br>[Sesamum indicum]                    |
| c51203.graph_c0 | 0.03031958    | 0.09104983    | 0.03896186    | 12.9047577     | 16.0087123     | 16.0805769     | 1.085E-64 | 7.113708  | up        | PREDICTED: aldehyde dehydrogenase family 3 member F1<br>[Sesamum indicum]                 |
| c51204.graph_c0 | 34.2745661    | 21.986681     | 22.0220872    | 0              | 0.15704651     | 0              | 2.295E-37 | -10.01083 | down      | histone H3 [Neurospora crassa OR74A]                                                      |
| c51207.graph_c0 | 0.25671103    | 0.32121011    | 0.28864836    | 22.7925858     | 21.9224211     | 21.7537532     | 4.084E-75 | 5.244283  | up        | PREDICTED: argininosuccinate lyase, chloroplastic isoform<br>X1 [Sesamum indicum]         |

| #ID             | 0 h-1<br>FPKM | 0 h-2<br>FPKM | 0 h-3<br>FPKM | 48 h-1<br>FPKM | 48 h-2<br>FPKM | 48 h-3<br>FPKM | FDR       | log2FC    | regulated | nr_annotation                                                                                  |
|-----------------|---------------|---------------|---------------|----------------|----------------|----------------|-----------|-----------|-----------|------------------------------------------------------------------------------------------------|
| c51211.graph_c0 | 3.60094432    | 3.69466387    | 2.89209751    | 171.34499      | 181.255659     | 202.273782     | 9.58E-142 | 4.750315  | up        | PREDICTED: acyl carrier protein 1, chloroplastic-like [Sesamum indicum]                        |
| c51213.graph_c0 | 10.4737729    | 8.15442505    | 6.48036173    | 3.75243662     | 4.54314468     | 4.76985077     | 1.113E-05 | -1.959624 | down      | -                                                                                              |
| c51215.graph_c0 | 24.476775     | 25.8742017    | 22.641187     | 9.62245934     | 8.95821326     | 11.8484332     | 2.772E-21 | -2.279596 | down      | PREDICTED: uncharacterized protein LOC105162031 [Sesamum indicum]                              |
| c51220.graph_c0 | 0             | 0             | 0             | 22.600099      | 42.4665815     | 39.6317276     | 1.01E-19  | Inf       | up        | -                                                                                              |
| c51221.graph_c0 | 0.32666738    | 0.28612018    | 0.20989026    | 5.41705136     | 4.10477107     | 4.6192239      | 4.708E-10 | 3.094639  | up        | PREDICTED: uncharacterized protein LOC105171540 [Sesamum indicum]                              |
| c51222.graph_c0 | 4.34024535    | 3.33422134    | 2.98325357    | 0.18597754     | 0.29553098     | 0.33096339     | 8.059E-16 | -4.736663 | down      | PREDICTED: transcription factor PAK2-like [Sesamum indicum]                                    |
| c51225.graph_c0 | 11.030075     | 10.4398708    | 7.64839133    | 82.9530632     | 92.675003      | 105.994404     | 2.667E-39 | 2.256812  | up        | PREDICTED: S-formylglutamate lyase [Sesamum indicum]                                           |
| c51228.graph_c0 | 39.5638551    | 37.7930278    | 40.7697364    | 172.802043     | 167.39693      | 176.491455     | 4.411E-15 | 1.111242  | up        | PREDICTED: nascent polypeptide-associated complex subunit alpha-like protein [Sesamum indicum] |
| c51231.graph_c0 | 4.90061722    | 4.57848948    | 4.47821308    | 3.81247094     | 4.198279       | 3.12449948     | 0.0001006 | -1.34235  | down      | PREDICTED: uncharacterized protein LOC105173527 isoform X1 [Sesamum indicum]                   |
| c51232.graph_c0 | 28.1604181    | 25.2025342    | 24.6870661    | 133.233793     | 144.755194     | 150.927079     | 5.376E-19 | 1.439929  | up        | hypothetical protein MIMGU_mgv1a017391mg [Erythranthe guttata]                                 |
| c51233.graph_c0 | 7.17971124    | 7.99542695    | 5.99703858    | 32.3279694     | 33.4592565     | 27.220297      | 1.403E-05 | 1.1209    | up        | hypothetical protein MIMGU_mgv1a002611mg [Erythranthe guttata]                                 |
| c51234.graph_c0 | 2.86224339    | 2.75491297    | 3.53663084    | 0.50709333     | 0.75208545     | 0.27072516     | 7.755E-11 | -3.60289  | down      | hypothetical protein MIMGU_mgv1a020559mg [Erythranthe guttata]                                 |
| c51235.graph_c0 | 0.55130364    | 0.21225219    | 0.16348777    | 4.25851993     | 8.89860441     | 10.0813722     | 1.435E-06 | 3.626948  | up        | PREDICTED: probable pectate lyase 16 [Sesamum indicum]                                         |
| c51236.graph_c0 | 0             | 0.20413607    | 0.08735351    | 41.1446987     | 54.9989377     | 62.7446026     | 8.195E-51 | 8.065043  | up        | hypothetical protein MIMGU_mgv1a014485mg [Erythranthe guttata]                                 |
| c51237.graph_c0 | 0             | 0             | 0             | 3.86290117     | 4.82303885     | 3.1302946      | 1.899E-13 | Inf       | up        | -                                                                                              |
| c51241.graph_c0 | 8.55215087    | 4.65256226    | 5.2560164     | 0              | 0              | 0              | 8.415E-16 | -Inf      | down      | predicted protein [Hordeum vulgare subsp. vulgare]                                             |
| c51242.graph_c0 | 3.00497207    | 3.43769267    | 2.28538233    | 16.4972626     | 16.1601005     | 17.5446186     | 4.637E-07 | 1.509634  | up        | hypothetical protein MIMGU_mgv1a003845mg [Erythranthe guttata]                                 |
| c51246.graph_c0 | 0.07254594    | 0             | 0.18644881    | 8.28742231     | 6.65544185     | 5.11429415     | 2.436E-13 | 5.246569  | up        | PREDICTED: uncharacterized protein LOC105170022 [Sesamum indicum]                              |
| c51248.graph_c0 | 0             | 0             | 0             | 4.88758775     | 5.45032271     | 7.210095       | 2.033E-12 | Inf       | up        | PREDICTED: mitogen-activated protein kinase 19 isoform X2 [Sesamum indicum]                    |
| c51249.graph_c0 | 4.0475686     | 3.85154154    | 3.66016415    | 30.6136789     | 35.6502442     | 34.8178756     | 1.366E-24 | 2.109177  | up        | PREDICTED: NADP-dependent D-sorbitol-6-phosphate dehydrogenase-like [Sesamum indicum]          |
| c51257.graph_c0 | 2.35757864    | 2.21545332    | 2.22581527    | 11.5246603     | 18.4073855     | 24.3743323     | 0.0001197 | 1.970768  | up        | PREDICTED: leucine-rich repeat extensin-like protein 2 [Sesamum indicum]                       |
| c51262.graph_c0 | 0.19147915    | 0.19167088    | 0.16403885    | 14.5826544     | 13.424046      | 13.5772474     | 5.919E-48 | 5.233615  | up        | hypothetical protein MIMGU_mgv1a003907mg [Erythranthe guttata]                                 |

| #ID             | 0 h-1<br>FPKM | 0 h-2<br>FPKM | 0 h-3<br>FPKM | 48 h-1<br>FPKM | 48 h-2<br>FPKM | 48 h-3<br>FPKM | FDR       | log2FC    | regulated | nr_annotation                                                                      |
|-----------------|---------------|---------------|---------------|----------------|----------------|----------------|-----------|-----------|-----------|------------------------------------------------------------------------------------|
| c51264.graph_c0 | 0             | 0             | 0             | 7.48999691     | 6.0420524      | 7.2759812      | 3.168E-18 | Inf       | up        | PREDICTED: protein HEADING DATE 3A [Populus euphratica]                            |
| c51265.graph_c0 | 4.01757012    | 4.09340728    | 4.24081941    | 1.38796787     | 1.33034712     | 2.99929898     | 8.88E-07  | -2.135394 | down      | kunitz trypsin inhibitor [Populus tremula]                                         |
| c51267.graph_c0 | 20.3306598    | 21.6700653    | 20.319991     | 6.86268594     | 6.71901446     | 7.9581299      | 1.512E-56 | -2.550814 | down      | PREDICTED: exocyst complex component EXO70B1-like [Sesamum indicum]                |
| c51268.graph_c0 | 0             | 0             | 0             | 2.31080782     | 2.87376341     | 2.14554042     | 4.124E-11 | Inf       | up        | large subunit ribosomal protein L3e, cytoplasmic [Guillardia theta CCMP2712]       |
| c51269.graph_c0 | 0.07245576    | 0.07252831    | 0.09310852    | 3.07054474     | 2.89929702     | 3.32609838     | 2.476E-09 | 4.266757  | up        | PREDICTED: uncharacterized protein LOC102579011 [Solanum tuberosum]                |
| c51270.graph_c0 | 0             | 0             | 0.26421747    | 66.2975915     | 87.0235916     | 132.983015     | 1.211E-22 | 9.02379   | up        | PREDICTED: auxin-binding protein ABP19a [Beta vulgaris subsp. vulgaris]            |
| c51271.graph_c0 | 91.1880693    | 91.236806     | 93.4053626    | 9.40392506     | 10.6264729     | 8.50701523     | 4.47E-168 | -4.291294 | down      | PREDICTED: acconit denydrogenase-like / [Sesamum indicum]                          |
| c51273.graph_c0 | 0.39774602    | 0.27870101    | 0.71556713    | 6.04608798     | 5.66754046     | 6.45572728     | 1.624E-10 | 2.680591  | up        | PREDICTED: mitogen-activated protein kinase homolog NTF6 [Sesamum indicum]         |
| c51274.graph_c0 | 0.61682243    | 0.49395206    | 0.95116949    | 6.13717616     | 3.49159676     | 5.05631708     | 0.0006878 | 1.816846  | up        | hypothetical protein glysoja_042469, partial [Glycine soja]                        |
| c51275.graph_c0 | 0.0678191     | 0             | 0             | 3.43636604     | 4.63325308     | 3.89156452     | 6.716E-13 | 6.461958  | up        | PREDICTED: homeobox-leucine zipper protein ATHB-52 [Sesamum indicum]               |
| c51276.graph_c0 | 12.4014537    | 12.0828352    | 11.6866632    | 8.98768869     | 9.52136635     | 8.81046504     | 0.0001325 | -1.422299 | down      | PREDICTED: uncharacterized protein LOC103341433 [Prunus mume]                      |
| c51279.graph_c0 | 0             | 0.04741835    | 0             | 1.96385281     | 8.18315811     | 12.8532774     | 8.507E-05 | 7.895657  | up        | hypothetical protein MIMGU_mgv1a008158mg [Erythranthe guttata]                     |
| c51281.graph_c0 | 3.86986257    | 2.55314527    | 2.42995278    | 18.1499554     | 15.6654064     | 13.6263272     | 7.594E-07 | 1.41216   | up        | PREDICTED: protein TRANSPARENT TESTA GLABRA 1 [Sesamum indicum]                    |
| c51282.graph_c0 | 6.09062293    | 6.61754724    | 6.37147759    | 3.04520876     | 4.48059643     | 3.83861196     | 2.561E-13 | -1.771136 | down      | PREDICTED: scarecrow-like protein 15 [Sesamum indicum]                             |
| c51286.graph_c0 | 10.8798077    | 11.261593     | 8.70024062    | 33.9485085     | 43.8870002     | 52.3241349     | 2.681E-05 | 1.056415  | up        | hypothetical protein JCGZ_13359 [Jatropha curcas]                                  |
| c51287.graph_c0 | 0             | 0             | 0             | 28.9300065     | 40.3785213     | 30.5683232     | 1.056E-52 | Inf       | up        | hypothetical protein MIMGU_mgv1a013386mg [Erythranthe guttata]                     |
| c51295.graph_c0 | 0             | 0             | 0             | 3.19555126     | 2.79655141     | 3.33788357     | 2.211E-10 | Inf       | up        | hypothetical protein M569_00609, partial [Genlisea aurea]                          |
| c51305.graph_c0 | 0.76571954    | 0.447117      | 0.49198996    | 5.99616167     | 6.60131234     | 4.39381649     | 3.661E-06 | 2.303729  | up        | PREDICTED: uncharacterized protein LOC105156993 [Sesamum indicum]                  |
| c51308.graph_c0 | 2.43760221    | 2.40131225    | 1.54134723    | 97.1344913     | 127.032313     | 137.938607     | 8.051E-57 | 4.808267  | up        | PREDICTED: adenosine kinase 2-like [Sesamum indicum]                               |
| c51311.graph_c0 | 0.54382398    | 0.54436854    | 0.51493131    | 5.90659852     | 10.4195634     | 13.9603358     | 3.445E-06 | 3.211457  | up        | PREDICTED: pentatricopeptide repeat-containing protein At1g02150 [Sesamum indicum] |
| c51312.graph_c0 | 9.49344487    | 5.9551827     | 6.01839657    | 0              | 0              | 0              | 2.957E-24 | -Inf      | down      | ous ribosomal protein L21-a, putative [Candida maltosa Y-2161]                     |
| c51314.graph_c0 | 14.7694852    | 11.4822031    | 12.5244595    | 74.318354      | 77.4873887     | 82.8444024     | 8.173E-21 | 1.57945   | up        | PREDICTED: 30S ribosomal protein S10, chloroplastic [Sesamum indicum]              |

| #ID             | 0 h-1<br>FPKM | 0 h-2<br>FPKM | 0 h-3<br>FPKM | 48 h-1<br>FPKM | 48 h-2<br>FPKM | 48 h-3<br>FPKM | FDR       | log2FC    | regulated | nr_annotation                                                                 |
|-----------------|---------------|---------------|---------------|----------------|----------------|----------------|-----------|-----------|-----------|-------------------------------------------------------------------------------|
| c51315.graph_c0 | 0             | 0             | 0             | 5.15771246     | 8.58624006     | 4.91710879     | 3.549E-09 | Inf       | up        | unnamed protein product [Pneumocystis jirovecii]                              |
| c51319.graph_c0 | 11.9139568    | 10.316258     | 9.39258052    | 48.2132179     | 50.505376      | 49.1910078     | 1.68E-10  | 1.209598  | up        | hypothetical protein MIMGU_mgv1a015541mg [Erythranthe guttata]                |
| c51323.graph_c0 | 0.02973189    | 0.17856999    | 0.07641332    | 4.4921174      | 6.55793252     | 5.28879155     | 3.435E-21 | 4.820378  | up        | PREDICTED: uncharacterized protein LOC105175605 isoform X2 [Sesamum indicum]  |
| c51327.graph_c0 | 177.348475    | 185.347825    | 159.404353    | 122.827971     | 137.543229     | 140.403377     | 1.787E-23 | -1.39995  | down      | PREDICTED: uncharacterized protein LOC103445335 [Malus domestica]             |
| c51329.graph_c0 | 0             | 0             | 0             | 2.52858474     | 3.10168612     | 2.72358676     | 1.185E-09 | Inf       | up        | -                                                                             |
| c51331.graph_c0 | 0.88235673    | 1.76648056    | 1.700795      | 6.60468716     | 10.3338317     | 14.5564086     | 0.0012908 | 1.824893  | up        | --                                                                            |
| c51334.graph_c0 | 23.8753218    | 23.1104759    | 22.58021      | 9.25553374     | 16.918631      | 15.922002      | 9.461E-27 | -1.751705 | down      | PREDICTED: GATA transcription factor 8-like [Sesamum indicum]                 |
| c51335.graph_c0 | 0.84250178    | 0.73792724    | 0.13533102    | 71.2133766     | 93.8399031     | 111.622954     | 2.224E-39 | 6.322388  | up        | PREDICTED: uncharacterized protein LOC105168965 [Sesamum indicum]             |
| c51336.graph_c0 | 3.1215495     | 3.29132461    | 2.6742098     | 0.99693533     | 1.70605955     | 1.91060599     | 2.673E-07 | -2.003519 | down      | -                                                                             |
| c51337.graph_c0 | 0.04182974    | 0.08374325    | 0             | 6.31995048     | 11.1450938     | 16.8360725     | 1.101E-09 | 7.078959  | up        | PREDICTED: cell division control protein 2 homolog D [Sesamum indicum]        |
| c51341.graph_c0 | 5.90274641    | 7.72670547    | 5.39720625    | 2.61442067     | 0.77550527     | 1.11662198     | 1.072E-11 | -3.071527 | down      | PREDICTED: putative calcium-binding protein CML23 [Sesamum indicum]           |
| c51343.graph_c0 | 14.9802184    | 18.2611564    | 15.9591604    | 9.82536133     | 12.3261856     | 12.5674119     | 4.199E-19 | -1.524601 | down      | PREDICTED: F-box/kelch-repeat protein SKIP30 [Sesamum indicum]                |
| c51346.graph_c0 | 2.38803602    | 2.34696496    | 1.78543757    | 11.040073      | 10.7633592     | 10.1437185     | 3.243E-05 | 1.279149  | up        | PREDICTED: serine protease SPPA, chloroplastic-like [Sesamum indicum]         |
| c51348.graph_c0 | 0.07858398    | 0.07866267    | 0.05049176    | 2.28049557     | 3.75807993     | 4.41264222     | 6.537E-11 | 4.630071  | up        | PREDICTED: BTB/POZ domain-containing protein At1g63850-like [Sesamum indicum] |
| c51349.graph_c0 | 2.93372511    | 4.01859119    | 4.56362721    | 0              | 0              | 0.12657268     | 2.869E-18 | -7.551949 | down      | -                                                                             |
| c51351.graph_c0 | 60.1670312    | 60.3324339    | 58.0468221    | 30.7755117     | 29.3221257     | 26.3935683     | 8.567E-48 | -2.060921 | down      | PREDICTED: putative E3 ubiquitin-protein ligase RF4 [Sesamum indicum]         |
| c51353.graph_c0 | 0.54811339    | 0.59086703    | 0.59598626    | 5.04957803     | 4.1972338      | 4.94239258     | 5.662E-06 | 2.016055  | up        | PREDICTED: uncharacterized protein LOC105163262 isoform X2 [Sesamum indicum]  |
| c51356.graph_c0 | 1.5981637     | 1.59976402    | 0.55505504    | 13.6887143     | 13.27902       | 13.6318379     | 1.149E-14 | 2.427476  | up        | PREDICTED: A-kinase anchor protein 1/B [Sesamum indicum]                      |
| c51358.graph_c0 | 10.4842046    | 8.3514185     | 10.1519022    | 66.5228235     | 72.4184351     | 75.1091881     | 2.308E-26 | 1.864655  | up        | PREDICTED: 50S ribosomal protein HLP, mitochondrial [Sesamum indicum]         |
| c51360.graph_c0 | 0             | 0             | 0             | 8.51718609     | 6.67696517     | 5.75969114     | 3.973E-16 | Inf       | up        | PREDICTED: uncharacterized protein LOC105165055 [Sesamum indicum]             |
| c51361.graph_c0 | 0.0971904     | 0.09728772    | 0.06244676    | 2.68614412     | 7.87294837     | 6.89149793     | 1.598E-06 | 5.056736  | up        | hypothetical protein MIMGU_mgv1a009735mg [Erythranthe guttata]                |
| c51363.graph_c0 | 6.98448335    | 7.28898692    | 10.5030547    | 0.27381113     | 0.29006969     | 0.06090887     | 1.868E-23 | -6.324373 | down      | -                                                                             |

| #ID             | 0 h-1<br>FPKM | 0 h-2<br>FPKM | 0 h-3<br>FPKM | 48 h-1<br>FPKM | 48 h-2<br>FPKM | 48 h-3<br>FPKM | FDR       | log2FC    | regulated | nr_annotation                                                                              |
|-----------------|---------------|---------------|---------------|----------------|----------------|----------------|-----------|-----------|-----------|--------------------------------------------------------------------------------------------|
| c51366.graph_c0 | 0.80679455    | 0.48456146    | 0.31102888    | 81.7598937     | 113.858952     | 115.539372     | 2.328E-64 | 6.585552  | up        | PREDICTED: putative invertase inhibitor [Sesamum indicum]                                  |
| c51369.graph_c0 | 0.87150579    | 1.96285155    | 1.3998993     | 9.63465568     | 13.183718      | 10.7160734     | 0.0002657 | 1.962505  | up        | -                                                                                          |
| c51370.graph_c0 | 4.26194463    | 2.34641678    | 3.55989893    | 113.079784     | 128.737298     | 166.822768     | 1.462E-29 | 4.306935  | up        | putative plasma membrane intrinsic protein PIP family member 2 aquaporin [Cedrela odorata] |
| c51372.graph_c0 | 0.08081761    | 0             | 0             | 14.8908899     | 18.890673      | 26.1021539     | 3.127E-26 | 8.530464  | up        | PREDICTED: 2-alkenal reductase (NADP(+)-dependent) isoform X1 [Sesamum indicum]            |
| c51373.graph_c0 | 6.53177224    | 6.30480165    | 8.54347139    | 2.84756442     | 4.43959696     | 4.58942617     | 5.171E-09 | -1.876884 | down      | PREDICTED: F-box protein At2g24880 [Sesamum indicum]                                       |
| c51375.graph_c0 | 71.8959022    | 72.6455589    | 71.3362017    | 324.44019      | 336.569296     | 358.941586     | 6.679E-18 | 1.221722  | up        | hypothetical protein MIMGU_mgv1a013134mg [Erythranthe guttata]                             |
| c51377.graph_c0 | 9.39448121    | 6.12677575    | 5.85322681    | 0              | 0              | 0              | 1.927E-24 | -Inf      | down      | unknown [Lotus japonicus]                                                                  |
| c51379.graph_c0 | 90.0258061    | 92.7453312    | 87.5782263    | 46.5506779     | 45.9587821     | 49.8377253     | 2.074E-42 | -1.942803 | down      | PREDICTED: glutelin type-B 5 [Sesamum indicum]                                             |
| c51380.graph_c0 | 24.7052913    | 25.7848653    | 23.3716134    | 16.5397439     | 18.4741277     | 16.8925159     | 3.397E-22 | -1.527028 | down      | PREDICTED: protein YLS9 [Sesamum indicum]                                                  |
| c51381.graph_c0 | 4.40598105    | 2.3816122     | 3.96330206    | 0              | 0              | 0              | 6.574E-19 | -Inf      | down      | --                                                                                         |
| c51382.graph_c0 | 4.31117991    | 5.0718211     | 4.05507853    | 54.8673378     | 31.7086478     | 24.3010137     | 0.0061428 | 2.042082  | up        | PREDICTED: abscisic acid receptor PYL4-like [Sesamum indicum]                              |
| c51384.graph_c0 | 0.8088742     | 0.64099996    | 0.77957653    | 11.8919532     | 12.4665098     | 12.4324407     | 2.577E-23 | 3.025841  | up        | PREDICTED: afadin- and alpha-actinin-binding protein [Sesamum indicum]                     |
| c51386.graph_c0 | 0.20327992    | 0.5087087     | 0.13061138    | 5.8055165      | 3.47191012     | 4.08258016     | 7.857E-06 | 2.985658  | up        | -                                                                                          |
| c51391.graph_c0 | 5.89714488    | 4.83312217    | 5.35200816    | 0.6451491      | 0.53957151     | 0.4531972      | 5.935E-34 | -4.307638 | down      | hypothetical protein MIMGU_mgv1a026169mg, partial [Erythranthe guttata]                    |
| c51392.graph_c0 | 0             | 0.07816369    | 0             | 3.02137327     | 3.81045074     | 4.03259965     | 1.471E-11 | 6.108466  | up        | PREDICTED: 21 kDa protein-like [Sesamum indicum]                                           |
| c51395.graph_c0 | 50.7126173    | 58.1688823    | 51.3674977    | 37.2658878     | 37.6153884     | 33.8436612     | 4.993E-20 | -1.576018 | down      | PREDICTED: E3 ubiquitin-protein ligase RING1-like [Sesamum indicum]                        |
| c51401.graph_c0 | 8.24779118    | 7.43630044    | 7.66717233    | 0.48500446     | 0.57089268     | 0.62335585     | 1.989E-35 | -4.818322 | down      | PREDICTED: uncharacterized protein LOC105157495 [Sesamum indicum]                          |
| c51405.graph_c0 | 4.32583663    | 4.54667672    | 3.61326637    | 23.24725       | 20.1946669     | 23.2856964     | 4.103E-07 | 1.404247  | up        | PREDICTED: DEAD-box ATP-dependent RNA helicase 31-like [Sesamum indicum]                   |
| c51406.graph_c0 | 0             | 0             | 0             | 13.8566545     | 26.5775218     | 29.4179162     | 7.56E-20  | Inf       | up        | PREDICTED: pectinesterase-like [Sesamum indicum]                                           |
| c51408.graph_c0 | 2.3589027     | 2.95158098    | 3.03128336    | 11.7713647     | 15.5399541     | 15.4694246     | 0.0045972 | 1.334209  | up        | hypothetical protein F01R_0013501180g [Propius trichocarpal]                               |
| c51409.graph_c0 | 5.61440049    | 4.29766423    | 5.80007457    | 0.10141867     | 0.10744078     | 0.27072516     | 1.593E-21 | -6.061411 | down      | -                                                                                          |
| c51410.graph_c0 | 3.10239495    | 3.03649038    | 3.18936027    | 1.14325143     | 1.34570696     | 0.84771521     | 7.078E-08 | -2.501054 | down      | PREDICTED: cyclic dof factor 2-like [Sesamum indicum]                                      |
| c51412.graph_c0 | 3.93199542    | 3.18224347    | 1.93510332    | 13.0252638     | 17.1871227     | 13.7500307     | 2.053E-06 | 1.265563  | up        | PREDICTED: probable peroxidase 61 [Sesamum indicum]                                        |
| c51413.graph_c0 | 10.6799548    | 10.3895041    | 8.31181809    | 6.92892321     | 10.2764956     | 11.3441781     | 0.0044515 | -1.064027 | down      | unknown [Lotus japonicus]                                                                  |
| c51414.graph_c0 | 21.4786633    | 20.972389     | 18.9711837    | 9.45916262     | 13.62292       | 14.1036695     | 2.145E-29 | -1.747017 | down      | PREDICTED: methyltransferase-like protein 13 [Sesamum indicum]                             |

| #ID             | 0 h-1<br>FPKM | 0 h-2<br>FPKM | 0 h-3<br>FPKM | 48 h-1<br>FPKM | 48 h-2<br>FPKM | 48 h-3<br>FPKM | FDR       | log2FC    | regulated | nr_annotation                                                                                |
|-----------------|---------------|---------------|---------------|----------------|----------------|----------------|-----------|-----------|-----------|----------------------------------------------------------------------------------------------|
| c51416.graph_c0 | 0.11559786    | 0.11571361    | 0             | 3.78061816     | 4.11792642     | 6.01724445     | 8.328E-13 | 4.905223  | up        | PREDICTED: uncharacterized protein LOC105175985 [Sesamum indicum]                            |
| c51417.graph_c0 | 3.20253016    | 3.20573701    | 3.35492776    | 22.640957      | 23.6456128     | 25.5959934     | 4.511E-21 | 1.860849  | up        | PREDICTED: ubiquitin receptor RAD23c-like [Sesamum indicum]                                  |
| c51418.graph_c0 | 4.5246781     | 4.62820798    | 4.00335083    | 15.3070165     | 21.3799287     | 21.5651444     | 2.724E-08 | 1.124385  | up        | PREDICTED: LOW QUALITY PROTEIN: BAG family molecular chaperone regulator 2 [Sesamum indicum] |
| c51420.graph_c0 | 2.53872621    | 2.80877029    | 2.40384693    | 0.55393583     | 1.23885878     | 1.86202425     | 8.613E-06 | -2.116039 | down      | PREDICTED: embryonic protein DC-8-like isoform X2 [Sesamum indicum]                          |
| c51422.graph_c0 | 2.01278187    | 1.67899781    | 1.2932522     | 12.8256161     | 12.6049789     | 12.0996354     | 0.0001622 | 1.89958   | up        | PREDICTED: GTP-binding protein OBGC, chloroplastic [Sesamum indicum]                         |
| c51424.graph_c0 | 0.2234788     | 0.22370258    | 0.09572637    | 1.85294923     | 1.89027225     | 3.48067984     | 0.0002727 | 2.718892  | up        | PREDICTED: LOW QUALITY PROTEIN: subtilisin-like protease [Sesamum indicum]                   |
| c51433.graph_c0 | 4.78419389    | 5.25057341    | 4.22203709    | 66.4312873     | 102.413521     | 110.329515     | 2.872E-16 | 3.267519  | up        | PREDICTED: leucine-rich repeat extensin-like protein 1 [Sesamum indicum]                     |
| c51435.graph_c0 | 11.2078908    | 12.4902449    | 9.18785494    | 6.1037084      | 7.67853999     | 8.16919389     | 1.033E-15 | -1.602805 | down      | PREDICTED: pentatricopeptide repeat-containing protein At1g09820 [Sesamum indicum]           |
| c51437.graph_c0 | 0.11213134    | 0.22448724    | 0.09606214    | 7.88543958     | 6.85803236     | 3.67672492     | 8.374E-08 | 4.405926  | up        | hypothetical protein MIMGU_mgv1a027064mg [Erythranthe guttata]                               |
| c51439.graph_c0 | 41.2766784    | 45.8542974    | 39.308467     | 32.9820462     | 38.7367543     | 39.501119      | 3.714E-17 | -1.204688 | down      | PREDICTED: uncharacterized protein At3g15000, mitochondrial [Sesamum indicum]                |
| c51440.graph_c0 | 17.8315849    | 19.7384743    | 16.6784376    | 8.26703079     | 8.15651469     | 8.208361       | 2.187E-34 | -2.155149 | down      | hypothetical protein MIMGU_mgv1a026899mg [Erythranthe guttata]                               |
| c51444.graph_c0 | 1.33021638    | 1.22502452    | 1.09400366    | 0.09803857     | 0.4154399      | 0.34893651     | 7.731E-09 | -3.116533 | down      | -                                                                                            |
| c51446.graph_c0 | 1.66639466    | 1.40117318    | 1.45614052    | 10.4393019     | 14.116711      | 16.2827692     | 2.792E-09 | 2.151299  | up        | PREDICTED: phospholipase D delta [Sesamum indicum]                                           |
| c51448.graph_c0 | 0             | 0.10205227    | 0             | 5.35361982     | 16.8155327     | 24.1941688     | 1.497E-06 | 7.803602  | up        | PREDICTED: uncharacterized protein LOC105162545 [Sesamum indicum]                            |
| c51450.graph_c0 | 1.9617302     | 1.79042741    | 1.6682433     | 8.23904241     | 8.84088919     | 9.29388001     | 3.681E-06 | 1.2649    | up        | PREDICTED: probable indole-3-acetic acid-amido synthetase GH3.5 isoform X1 [Sesamum indicum] |
| c51455.graph_c0 | 0.15920705    | 0.07968323    | 0.30688104    | 45.1749499     | 26.8809319     | 28.3854439     | 3.704E-16 | 6.506111  | up        | PREDICTED: uncharacterized protein LOC105171871 [Sesamum indicum]                            |
| c51460.graph_c0 | 0             | 0             | 0             | 91.6364774     | 129.436982     | 146.65607      | 9.788E-54 | Inf       | up        | PREDICTED: MLP-like protein 423 [Sesamum indicum]                                            |
| c51462.graph_c0 | 18.6289537    | 10.3317827    | 17.4689584    | 2.55113891     | 4.17677997     | 6.19087654     | 8.681E-08 | -2.875248 | down      | -                                                                                            |
| c51463.graph_c0 | 47.6161678    | 37.0281134    | 40.8345815    | 1.6314218      | 1.63227727     | 1.85485967     | 3.14E-91  | -5.633209 | down      | PREDICTED: uncharacterized protein LOC105175709 [Sesamum indicum]                            |
| c51466.graph_c0 | 125.48772     | 128.249015    | 126.701684    | 26.7858385     | 8.85735716     | 9.18453874     | 9.99E-158 | -4.079705 | down      | PREDICTED: zinc-finger homeodomain protein 6 [Sesamum indicum]                               |
| c51468.graph_c0 | 9.40967601    | 14.971409     | 11.3281132    | 1.36875905     | 1.83671004     | 0.56835967     | 3.958E-19 | -4.25895  | down      | PREDICTED: oleosin 1-like [Solanum lycopersicum]                                             |

| #ID             | 0 h-1<br>FPKM | 0 h-2<br>FPKM | 0 h-3<br>FPKM | 48 h-1<br>FPKM | 48 h-2<br>FPKM | 48 h-3<br>FPKM | FDR       | log2FC   | regulated | nr_annotation                                                                                           |
|-----------------|---------------|---------------|---------------|----------------|----------------|----------------|-----------|----------|-----------|---------------------------------------------------------------------------------------------------------|
| c51470.graph_c0 | 0.73263557    | 0.1833423     | 0.11768321    | 13.9208782     | 16.26692       | 17.4915412     | 4.534E-19 | 4.520034 | up        | PREDICTED: probable stress-associated endoplasmic reticulum protein [Musa acuminata subsp. malaccensis] |
| c51473.graph_c0 | 0             | 0.29656079    | 0             | 4.63994324     | 5.06002951     | 5.99050835     | 2.417E-14 | 4.716756 | up        | PREDICTED: DNA replication complex GINS protein PSF2 [Sesamum indicum]                                  |
| c51474.graph_c0 | 0             | 0             | 0             | 5.58110448     | 7.56800442     | 6.55516383     | 1.889E-11 | Inf      | up        | PREDICTED: subtilisin-like protease [Sesamum indicum]                                                   |
| c51476.graph_c0 | 63.4480049    | 63.545178     | 60.3293845    | 23.2819043     | 19.4494178     | 14.3249617     | 3.569E-79 | -2.72594 | down      | PREDICTED: uncharacterized protein LOC104224082 [Nicotiana sylvestris]                                  |
| c51477.graph_c0 | 5.36844353    | 3.72503377    | 4.15487627    | 0              | 0              | 0              | 4.17E-35  | -Inf     | down      | KEGGname: FUNGUS PROSOMAL PROTEIN L3 [Hemianthus annuus]                                                |
| c51478.graph_c0 | 0             | 0             | 0             | 3.67450081     | 2.66927181     | 4.01687415     | 1.593E-11 | Inf      | up        | PREDICTED: GDSL esterase/lipase 5 isoform X1 [Sesamum indicum]                                          |
| c51480.graph_c0 | 0.92155709    | 0.46123994    | 0.78949156    | 28.0169504     | 30.4300708     | 26.1883702     | 3.219E-19 | 4.265593 | up        | PREDICTED: uncharacterized protein LOC105179276 [Sesamum indicum]                                       |
| c51483.graph_c0 | 0.29925074    | 0.25675748    | 0.32961346    | 9.92481465     | 10.5141377     | 9.11139088     | 1.075E-21 | 4.041189 | up        | PREDICTED: UPF0553 protein-like isoform X1 [Sesamum indicum]                                            |
| c51489.graph_c0 | 2.83891531    | 3.0270901     | 2.45851469    | 62.4283165     | 60.5336135     | 64.6040355     | 3.254E-66 | 3.478319 | up        | PREDICTED: chlorophyll a-b binding protein 6, chloroplastic-like [Malus domestica]                      |
| c51490.graph_c0 | 7.48351737    | 9.56683331    | 7.18349637    | 0              | 0              | 0              | 4.151E-41 | -Inf     | down      | unnamed protein product [Coffea canephora]                                                              |
| c51492.graph_c0 | 2.56160418    | 3.05518038    | 3.43183781    | 10.3434654     | 13.4045006     | 17.2008156     | 0.0001962 | 1.151595 | up        | hypothetical protein MIMGU_mgv1a000973mg [Erythranthe guttata]                                          |
| c51500.graph_c0 | 0.43468377    | 0.87023808    | 0.44686869    | 9.61101703     | 7.72112792     | 8.55182516     | 1.625E-08 | 2.873912 | up        | PREDICTED: BRI1 kinase inhibitor 1 [Sesamum indicum]                                                    |
| c51506.graph_c0 | 0             | 0             | 0.16748021    | 5.04290698     | 6.93233313     | 6.99781463     | 2.524E-16 | 5.768084 | up        | PREDICTED: uncharacterized protein LOC103322890 [Prunus mume]                                           |
| c51508.graph_c0 | 4.92387019    | 4.7355144     | 5.45890585    | 34.0659003     | 30.8120153     | 33.3586251     | 4.535E-18 | 1.68257  | up        | PREDICTED: 30S ribosomal protein 3-1, chloroplastic [Sesamum indicum]                                   |
| c51511.graph_c0 | 4.18386607    | 4.34316875    | 4.11529481    | 22.0322283     | 26.6172148     | 28.0301156     | 1.24E-12  | 1.579576 | up        | PREDICTED: protein FLUORESCENT IN BLUE LIGHT, chloroplastic [Sesamum indicum]                           |
| c51513.graph_c0 | 0             | 0             | 0.05042378    | 26.2446138     | 36.7259829     | 40.7861099     | 2.984E-52 | 9.950161 | up        | PREDICTED: ectonucleotide pyrophosphatase/phosphodiesterase family member 1-like [Sesamum indicum]      |
| c51514.graph_c0 | 0.40461607    | 0.25313827    | 0.25997384    | 11.4157357     | 14.6110285     | 19.8592481     | 2.581E-16 | 4.622948 | up        | PREDICTED: cyclin-D3-3-like [Sesamum indicum]                                                           |
| c51516.graph_c0 | 12.2523612    | 6.67875898    | 8.41799546    | 0              | 0              | 0              | 6.133E-22 | -Inf     | down      | predicted protein [Physcomitrella patens]                                                               |
| c51517.graph_c0 | 0             | 0             | 0             | 8.71228466     | 4.3433455      | 8.27329067     | 3.512E-11 | Inf      | up        | PREDICTED: uncharacterized protein LOC105157094 [Sesamum indicum]                                       |
| c51518.graph_c0 | 0             | 0.07172588    | 0             | 2.97056065     | 3.77633857     | 4.69899911     | 2.474E-12 | 6.306415 | up        | PREDICTED: uncharacterized protein LOC105177191 [Sesamum indicum]                                       |
| c51527.graph_c0 | 0             | 0             | 0.27893722    | 6.39918429     | 6.35546232     | 8.54093355     | 2.969E-10 | 5.202354 | up        | -                                                                                                       |

| #ID             | 0 h-1<br>FPKM | 0 h-2<br>FPKM | 0 h-3<br>FPKM | 48 h-1<br>FPKM | 48 h-2<br>FPKM | 48 h-3<br>FPKM | FDR       | log2FC    | regulated | nr_annotation                                                                                      |
|-----------------|---------------|---------------|---------------|----------------|----------------|----------------|-----------|-----------|-----------|----------------------------------------------------------------------------------------------------|
| c51528.graph_c0 | 10.2457763    | 10.4911313    | 9.46912115    | 71.7802621     | 50.6281346     | 42.6439382     | 0.0009223 | 1.4421    | up        | PREDICTED: phytochrome A-associated F-box protein [Sesamum indicum]                                |
| c51532.graph_c0 | 0.03709169    | 0.07425767    | 0             | 2.63118922     | 2.24442088     | 3.13175693     | 1.287E-12 | 5.16587   | up        | PREDICTED: E2F transcription factor-like E2FE [Sesamum indicum]                                    |
| c51533.graph_c0 | 16.9552304    | 16.2521754    | 15.7138724    | 1.04135095     | 1.50434326     | 1.01082307     | 3.658E-79 | -4.803028 | down      | PREDICTED: uncharacterized protein LOC105155796 [Sesamum indicum]                                  |
| c51534.graph_c0 | 434.593424    | 445.102392    | 438.608057    | 161.516627     | 72.0614956     | 47.5871027     | 3.265E-95 | -3.226212 | down      | PREDICTED: zinc finger A20 and AN1 domain-containing stress-associated protein 5 [Sesamum indicum] |
| c51535.graph_c0 | 32.2664208    | 19.5524884    | 19.3814661    | 0              | 0              | 0              | 2.184E-28 | -Inf      | down      | -                                                                                                  |
| c51537.graph_c0 | 134.719924    | 125.495728    | 131.122502    | 12.4704162     | 11.876185      | 7.9617387      | 4.9E-187  | -4.611938 | down      | PREDICTED: anthocyanidin 3-O-glucosyltransferase 5-like [Sesamum indicum]                          |
| c51540.graph_c0 | 857.850664    | 933.26925     | 780.863924    | 135.627994     | 116.886772     | 105.481694     | 1.07E-123 | -3.85717  | down      | Polyubiquitin-A [Triticum urartu]                                                                  |
| c51541.graph_c0 | 0             | 0             | 0             | 3.12063275     | 4.77523511     | 5.47630939     | 5.739E-13 | Inf       | up        | RecName: Full=Casparian strip membrane protein 3; Short=MgCASP3 [Erythranthe guttata]              |
| c51543.graph_c0 | 5.28013372    | 5.53710769    | 5.16966162    | 0.38606378     | 0.32719021     | 0.68703445     | 1.424E-19 | -4.533634 | down      | -                                                                                                  |
| c51544.graph_c0 | 0.58553734    | 0.41028657    | 0.82768253    | 8.63096304     | 5.94324821     | 5.03985498     | 1.58E-05  | 2.413244  | up        | PREDICTED: polyol transporter 5-like [Sesamum indicum]                                             |
| c51545.graph_c0 | 16.2191611    | 15.6690509    | 13.9179239    | 3.30117247     | 5.02228317     | 4.06372081     | 1.36E-61  | -2.908899 | down      | PREDICTED: galactose oxidase [Sesamum indicum]                                                     |
| c51547.graph_c0 | 0.47543626    | 0             | 1.22190884    | 10.9500724     | 12.0642849     | 17.9276877     | 5.96E-08  | 3.552312  | up        | -                                                                                                  |
| c51549.graph_c0 | 0             | 0             | 0             | 7.19086335     | 7.32485363     | 6.56244817     | 1.682E-15 | Inf       | up        | PREDICTED: cyclin-U4-1 [Sesamum indicum]                                                           |
| c51553.graph_c0 | 3.9010621     | 3.52144474    | 4.02831904    | 15.5950147     | 15.9431311     | 16.7886708     | 6.939E-07 | 1.058381  | up        | hypothetical protein MIMGU_mgv1a005667mg [Erythranthe guttata]                                     |
| c51556.graph_c0 | 0             | 0             | 0             | 39.0420856     | 68.2670923     | 61.9176478     | 1.713E-39 | Inf       | up        | hypothetical protein MIMGU_mgv1a009759mg [Erythranthe guttata]                                     |
| c51558.graph_c0 | 4.28800689    | 5.74095216    | 1.99746875    | 17.1348237     | 43.7328417     | 40.1592717     | 0.0025987 | 2.046145  | up        | PREDICTED: blue copper protein-like [Sesamum indicum]                                              |
| c51560.graph_c0 | 0.04680039    | 0             | 0             | 3.14743696     | 3.5170307      | 3.87476189     | 8.494E-15 | 6.816092  | up        | PREDICTED: homeobox-leucine zipper protein HOX21-like [Sesamum indicum]                            |
| c51565.graph_c1 | 11.2072158    | 15.3643826    | 12.2101505    | 7.29470849     | 7.01451828     | 10.584977      | 4.406E-07 | -1.659268 | down      | PREDICTED: floral homeotic protein APETALA 2-like isoform X2 [Sesamum indicum]                     |
| c51566.graph_c0 | 2.87210383    | 3.13372799    | 2.17755261    | 17.198801      | 18.948846      | 17.3281459     | 3.068E-16 | 1.692662  | up        | PREDICTED: ankyrin repeat-containing protein At2g01680 [Sesamum indicum]                           |
| c51569.graph_c0 | 5.84030455    | 5.84615273    | 6.54284019    | 2.75921512     | 3.87304635     | 4.84888772     | 6.19E-06  | -1.693312 | down      | PREDICTED: uncharacterized protein LOC105171557 [Sesamum indicum]                                  |
| c51570.graph_c0 | 2.12078345    | 1.93559176    | 2.32451266    | 0.40225377     | 0.4261391      | 0.30679113     | 4.443E-11 | -3.508407 | down      | PREDICTED: uncharacterized protein LOC105175073 [Sesamum indicum]                                  |
| c51573.graph_c0 | 34.7559086    | 35.4565623    | 35.9011326    | 27.5765253     | 13.7954928     | 6.13435659     | 2.513E-17 | -2.156613 | down      | -                                                                                                  |
| c51574.graph_c0 | 3.72890961    | 4.08477973    | 4.88220773    | 1.16671067     | 1.57931862     | 1.78789424     | 1.017E-08 | -2.511977 | down      | hypothetical protein JCGZ_21459 [Jatropha curcas]                                                  |



| #ID             | 0 h-1<br>FPKM | 0 h-2<br>FPKM | 0 h-3<br>FPKM | 48 h-1<br>FPKM | 48 h-2<br>FPKM | 48 h-3<br>FPKM | FDR       | log2FC    | regulated | nr_annotation                                                                                     |
|-----------------|---------------|---------------|---------------|----------------|----------------|----------------|-----------|-----------|-----------|---------------------------------------------------------------------------------------------------|
| c51578.graph_c0 | 0.40585215    | 0.10156464    | 0.13038402    | 2.80423104     | 3.16879227     | 3.41009015     | 4.54E-06  | 2.867246  | up        | hypothetical protein CICLE_v10053008mg [Citrus clamentina]                                        |
| c51579.graph_c0 | 6.82941825    | 4.91730758    | 5.38881665    | 0.77266559     | 1.28628579     | 0.78572937     | 3.482E-13 | -3.613036 | down      | -                                                                                                 |
| c51582.graph_c0 | 13.0688342    | 12.9828152    | 11.8321148    | 0.2280277      | 0.38650832     | 0.16231814     | 1.16E-85  | -6.629327 | down      | PREDICTED: LOW QUALITY PROTEIN: EID1-like F-box protein 3 [Sesamum indicum]                       |
| c51583.graph_c0 | 32.5875606    | 32.1644967    | 28.2750375    | 28.3442011     | 35.2847887     | 28.8278708     | 1.638E-12 | -1.027563 | down      | PREDICTED: probable ubiquitin-conjugating enzyme E2 26 [Sesamum indicum]                          |
| c51588.graph_c0 | 2.25541527    | 2.33552455    | 3.39800446    | 1.86288714     | 1.59398323     | 0.57377969     | 3.58E-05  | -1.999229 | down      | -                                                                                                 |
| c51590.graph_c0 | 0             | 0             | 0             | 129.120805     | 132.21736      | 127.915542     | 7.12E-111 | Inf       | up        | PREDICTED: raucaffricine-O-beta-D-glucosidase-like [Sesamum indicum]                              |
| c51592.graph_c0 | 8.02379469    | 6.34447021    | 6.41181635    | 3.04378242     | 2.82967941     | 5.58249528     | 3.597E-08 | -1.879427 | down      | PREDICTED: glutaredoxin-C9-like [Sesamum indicum]                                                 |
| c51597.graph_c0 | 11.9019547    | 10.1736441    | 11.3419761    | 2.03281056     | 2.38191954     | 2.21986957     | 2.606E-52 | -3.352489 | down      | PREDICTED: pentatricopeptide repeat-containing protein At3g26630, chloroplastic [Sesamum indicum] |
| c51599.graph_c0 | 0.04979921    | 0             | 0             | 6.33120317     | 10.6439428     | 10.2055553     | 3.493E-23 | 8.087249  | up        | PREDICTED: uncharacterized protein LOC105165189 [Sesamum indicum]                                 |
| c51602.graph_c0 | 8.66082409    | 10.8368707    | 9.37221208    | 8.29387326     | 7.89659577     | 6.81934449     | 0.000116  | -1.342568 | down      | -                                                                                                 |
| c51603.graph_c0 | 0.32182691    | 0.08053729    | 0.20678016    | 4.74380708     | 2.82683721     | 1.91264561     | 0.0027292 | 2.958643  | up        | hypothetical protein MIMGU_mgv1a020884mg [Erythranthe guttata]                                    |
| c51604.graph_c0 | 14.084173     | 13.0977533    | 14.4789759    | 60.4395926     | 54.8054894     | 63.6854045     | 4.143E-09 | 1.08531   | up        | PREDICTED: 50S ribosomal protein L31, chloroplastic [Sesamum indicum]                             |
| c51605.graph_c0 | 1.08699855    | 0.63471743    | 0.23280603    | 3.9222047      | 4.77394501     | 3.93548022     | 0.0027858 | 1.684043  | up        | PREDICTED: 29 kDa ribonucleoprotein A, chloroplastic [Sesamum indicum]                            |
| c51606.graph_c0 | 0.1792196     | 0.6278967     | 0.69091283    | 4.62304591     | 5.85957661     | 5.36231727     | 8.96E-06  | 2.37396   | up        | PREDICTED: probable phospholipase A2 homolog 1 [Sesamum indicum]                                  |
| c51610.graph_c0 | 30.121116     | 13.0104829    | 18.0278371    | 0              | 0              | 0              | 1.927E-14 | -Inf      | down      | -                                                                                                 |
| c51614.graph_c0 | 1.01705138    | 0.76355235    | 1.14358237    | 11.126567      | 20.3485134     | 18.550134      | 1.473E-09 | 3.06678   | up        | -                                                                                                 |
| c51619.graph_c0 | 0             | 0             | 0             | 10.418928      | 12.4172897     | 12.206421      | 6.178E-22 | Inf       | up        | hypothetical protein MIMGU_mgv1a023502mg, partial [Erythranthe guttata]                           |
| c51620.graph_c0 | 67.9826049    | 59.5785063    | 75.0807732    | 43.0948127     | 32.5082969     | 24.9917203     | 4.064E-18 | -2.021577 | down      | PREDICTED: ethylene-responsive transcription factor ERF069-like [Sesamum indicum]                 |
| c51622.graph_c0 | 25.9222439    | 26.1828141    | 25.1791028    | 166.261949     | 166.115303     | 163.001751     | 3.891E-32 | 1.663393  | up        | PREDICTED: 40S ribosomal protein SA-like [Sesamum indicum]                                        |
| c51624.graph_c0 | 0             | 0             | 0             | 3.24221313     | 4.15030077     | 5.76980348     | 5.611E-11 | Inf       | up        | hypothetical protein MIMGU_mgv1a024616mg [Erythranthe guttata]                                    |
| c51629.graph_c0 | 51.9814082    | 43.846862     | 53.7947909    | 9.45002964     | 11.7698779     | 11.4765748     | 6.199E-51 | -3.216496 | down      | -                                                                                                 |
| c51632.graph_c0 | 0.19285497    | 0.38609617    | 0.86739194    | 271.214134     | 249.768513     | 228.993669     | 3.34E-132 | 7.98951   | up        | PREDICTED: non-specific lipid-transfer protein 2-like [Sesamum indicum]                           |
| c51635.graph_c0 | 0             | 0             | 0             | 0.94429641     | 1.15832032     | 1.10556483     | 6.063E-10 | Inf       | up        | -                                                                                                 |

| #ID             | 0 h-1<br>FPKM | 0 h-2<br>FPKM | 0 h-3<br>FPKM | 48 h-1<br>FPKM | 48 h-2<br>FPKM | 48 h-3<br>FPKM | FDR       | log2FC    | regulated | nr_annotation                                                                 |
|-----------------|---------------|---------------|---------------|----------------|----------------|----------------|-----------|-----------|-----------|-------------------------------------------------------------------------------|
| c51636.graph_c0 | 7.42837473    | 9.25682858    | 7.27295667    | 4.46922665     | 7.05258679     | 8.40904452     | 8.841E-07 | -1.290984 | down      | unnamed protein product [Coffea canephora]                                    |
| c51639.graph_c0 | 0.22546121    | 0             | 0.57945315    | 6.43899664     | 5.72112066     | 6.28383667     | 9.61E-08  | 3.484731  | up        | hypothetical protein ARALYDRAFT_486411 [Arabidopsis lyrata subsp. lyrata]     |
| c51642.graph_c0 | 7.14506391    | 6.94185924    | 6.95377993    | 23.4743527     | 33.7900284     | 41.6885424     | 0.0002751 | 1.208383  | up        | hypothetical protein MIMGU_mgv1a019984mg [Erythranthe guttata]                |
| c51644.graph_c0 | 1.59097771    | 1.20815718    | 1.90347146    | 5.35743166     | 7.71018008     | 6.97062853     | 0.0057179 | 1.064697  | up        | -                                                                             |
| c51645.graph_c0 | 56.3960131    | 62.0483583    | 55.7795129    | 35.8994096     | 22.4656118     | 18.4649865     | 1.636E-29 | -2.186774 | down      | PREDICTED: uncharacterized protein LOC105177839 [Sesamum indicum]             |
| c51647.graph_c0 | 1.89602712    | 1.59015397    | 1.77796453    | 31.1581336     | 29.0572752     | 21.2133054     | 1.654E-14 | 2.937651  | up        | hypothetical protein MIMGU_mgv1a009839mg [Erythranthe guttata]                |
| c51648.graph_c0 | 0.67447312    | 0.311607      | 0.20001338    | 6.88285251     | 10.633507      | 12.1210515     | 2.316E-12 | 3.626744  | up        | hypothetical protein MIMGU_mgv1a011849mg [Erythranthe guttata]                |
| c51657.graph_c0 | 3.41874635    | 2.85180809    | 4.2467836     | 0              | 0.22243932     | 0              | 7.549E-19 | -6.619193 | down      | -                                                                             |
| c51658.graph_c0 | 49.7268238    | 55.1871197    | 51.3985801    | 8.79715384     | 4.04431904     | 3.39690671     | 2.816E-63 | -4.266456 | down      | hypothetical protein MIMGU_mgv1a005887mg [Erythranthe guttata]                |
| c51659.graph_c0 | 0             | 0             | 0             | 1.99786456     | 2.40842563     | 3.18757826     | 9.804E-12 | Inf       | up        | hypothetical protein MIMGU_mgv1a012062mg [Erythranthe guttata]                |
| c51660.graph_c0 | 0.35354746    | 0.17695074    | 0.68148372    | 26.8711558     | 22.8596478     | 25.2864173     | 1.585E-31 | 4.926193  | up        | PREDICTED: nudix hydrolase 1 [Sesamum indicum]                                |
| c51668.graph_c0 | 77.04052      | 83.0838721    | 72.3068655    | 48.8206261     | 38.9912296     | 38.0223557     | 2.925E-41 | -1.897004 | down      | hypothetical protein MIMGU_mgv1a003993mg [Erythranthe guttata]                |
| c51669.graph_c0 | 2.44309736    | 2.90408321    | 4.218672      | 28.9782857     | 33.2323909     | 37.3002034     | 3.586E-20 | 2.352515  | up        | PREDICTED: probable calcium-binding protein CML13 [Sesamum indicum]           |
| c51671.graph_c0 | 0             | 0             | 0             | 5.40839234     | 8.51245331     | 5.22484255     | 1.021E-11 | Inf       | up        | PREDICTED: 60S ribosomal protein L35-like [Musa acuminata subsp. malaccensis] |
| c51672.graph_c0 | 29.5589602    | 16.8348698    | 21.7755592    | 0              | 0              | 0              | 2.107E-31 | -Inf      | down      | --                                                                            |
| c51676.graph_c0 | 158.237019    | 168.590537    | 155.25803     | 5.03377981     | 4.05283629     | 3.00990615     | 0         | -6.326874 | down      | hypothetical protein MIMGU_mgv1a009467mg [Erythranthe guttata]                |
| c51680.graph_c0 | 6.24373048    | 5.87684934    | 5.98764244    | 84.2215114     | 88.5858252     | 90.5236048     | 1.805E-48 | 2.843838  | up        | PREDICTED: cytochrome b-c1 complex subunit 6 [Sesamum indicum]                |
| c51682.graph_c0 | 0             | 0             | 0             | 4.52280687     | 6.04128689     | 7.52381536     | 5.262E-25 | Inf       | up        | PREDICTED: serine carboxypeptidase-like 34 [Sesamum indicum]                  |
| c51683.graph_c0 | 0.48839506    | 0.92887982    | 1.44349608    | 10.2586637     | 9.39016935     | 12.4510449     | 3.19E-12  | 2.460905  | up        | hypothetical protein MIMGU_mgv1a008015mg [Erythranthe guttata]                |
| c51684.graph_c0 | 1.81063396    | 0.55767601    | 0.35795944    | 18.9903821     | 28.545821      | 27.8580864     | 2.518E-16 | 3.777033  | up        | PREDICTED: 60S ribosomal protein L12-1-like [Cucumis sativus]                 |
| c51685.graph_c0 | 2.10277208    | 2.0692018     | 1.87776204    | 8.33985664     | 10.1220648     | 10.28388       | 2.028E-05 | 1.228404  | up        | PREDICTED: uncharacterized protein LOC105162245 [Sesamum indicum]             |

| #ID             | 0 h-1<br>FPKM | 0 h-2<br>FPKM | 0 h-3<br>FPKM | 48 h-1<br>FPKM | 48 h-2<br>FPKM | 48 h-3<br>FPKM | FDR       | log2FC    | regulated | nr_annotation                                                                                      |
|-----------------|---------------|---------------|---------------|----------------|----------------|----------------|-----------|-----------|-----------|----------------------------------------------------------------------------------------------------|
| c51687.graph_c0 | 4.11647333    | 5.75328408    | 4.39155798    | 0.93020242     | 1.13704232     | 1.84638209     | 6.468E-11 | -2.889553 | down      | PREDICTED: LOB domain-containing protein 37-like [Sesamum indicum]                                 |
| c51688.graph_c0 | 0.86678195    | 1.7352998     | 1.33661895    | 22.8381315     | 19.9644704     | 21.8133505     | 1.099E-16 | 3.019263  | up        | PREDICTED: uncharacterized protein LOC105159746 [Sesamum indicum]                                  |
| c51689.graph_c0 | 0             | 0             | 0             | 4.35599833     | 2.23289615     | 2.58396075     | 2.997E-08 | Inf       | up        | PREDICTED: transcription factor PCF1-like [Sesamum indicum]                                        |
| c51690.graph_c0 | 0.48727025    | 0.24387909    | 0.31308078    | 19.1906947     | 14.1479267     | 17.175623      | 7.485E-17 | 4.585933  | up        | histone H4 [Zea mays]                                                                              |
| c51694.graph_c0 | 2.19521648    | 1.09870733    | 0.90673074    | 6.71717945     | 8.87591728     | 8.61188589     | 0.0008325 | 1.511295  | up        | PREDICTED: uncharacterized protein LOC105176347 isoform X3 [Sesamum indicum]                       |
| c51696.graph_c0 | 0             | 0.10972919    | 0             | 1.86828846     | 4.01194274     | 4.22337386     | 5.238E-08 | 5.506164  | up        | PREDICTED: carboxylesterase 1-like [Sesamum indicum]                                               |
| c51700.graph_c0 | 0             | 0             | 0             | 73.5011737     | 71.3767826     | 68.595774      | 5.496E-90 | Inf       | up        | --                                                                                                 |
| c51703.graph_c0 | 2.32665346    | 1.66355946    | 1.38814084    | 18.755318      | 16.9494609     | 16.415906      | 6.981E-10 | 2.265753  | up        | hypothetical protein MIMGU_mgv1a001920mg [Erythranthe guttata]                                     |
| c51705.graph_c0 | 0             | 0             | 0             | 2.94548992     | 4.41420941     | 3.38796582     | 9.463E-13 | Inf       | up        | 60S ribosomal protein L8 [Rozella allomyces CSF55]                                                 |
| c51711.graph_c0 | 0             | 0             | 0             | 2.82228415     | 6.2944586      | 2.90776485     | 3.731E-05 | Inf       | up        | predicted protein [Physcomitrella patens]                                                          |
| c51715.graph_c0 | 7.67698065    | 7.88689609    | 9.60561291    | 0.3722387      | 1.77453795     | 1.98729454     | 3.904E-12 | -3.646966 | down      | BnaCnng51820D [Brassica napus]                                                                     |
| c51716.graph_c0 | 22.053418     | 19.903493     | 19.8224516    | 2.03533924     | 1.84816726     | 1.61699341     | 4.5E-109  | -4.503169 | down      | PREDICTED: SNF1-related protein kinase regulatory subunit gamma-1-like [Sesamum indicum]           |
| c51717.graph_c0 | 11.6189151    | 6.44395319    | 8.37333493    | 0              | 0              | 0              | 4.508E-26 | -Inf      | down      | 60S ribosomal protein L8 [Rozella allomyces CSF55]                                                 |
| c51719.graph_c0 | 2.54892225    | 1.02954239    | 1.32167927    | 0              | 0              | 0              | 1.827E-09 | -Inf      | down      | Bifunctional monodehydroascorbate reductase and carbonic anhydrase nectarin-3 [Gossypium arboreum] |
| c51720.graph_c0 | 12.6927661    | 15.6642855    | 11.8420202    | 161.064627     | 177.67079      | 189.066601     | 4.239E-65 | 2.696569  | up        | hypothetical protein MIMGU_mgv1a021151mg [Erythranthe guttata]                                     |
| c51724.graph_c0 | 13.1862118    | 12.733554     | 13.456168     | 176.074517     | 191.071718     | 213.259471     | 2.2E-77   | 2.861507  | up        | PREDICTED: 60S acidic ribosomal protein P3-like [Sesamum indicum]                                  |
| c51728.graph_c0 | 7.28198627    | 6.66448281    | 7.75347369    | 33.7987708     | 39.2576666     | 40.534445      | 3.189E-11 | 1.366564  | up        | PREDICTED: proliferation-associated protein 2G4-like [Sesamum indicum]                             |
| c51729.graph_c0 | 14.4472132    | 13.7921577    | 13.3222794    | 1.41723819     | 1.76250366     | 2.08347394     | 2.886E-42 | -4.003194 | down      | PREDICTED: homeobox-leucine zipper protein HOX3 [Sesamum indicum]                                  |
| c51730.graph_c0 | 0.16859296    | 0.25314266    | 0.21664862    | 2.71807948     | 4.77170247     | 4.90616244     | 1.36E-07  | 3.251029  | up        | PREDICTED: uncharacterized protein LOC105170277 [Sesamum indicum]                                  |
| c51731.graph_c0 | 7.3777705     | 8.67463029    | 8.57780079    | 4.31548152     | 2.97162411     | 2.78391989     | 4.006E-14 | -2.300438 | down      | hypothetical protein MIMGU_mgv1a020203mg [Erythranthe guttata]                                     |
| c51733.graph_c0 | 3.61757604    | 2.80350851    | 4.04889251    | 0              | 0              | 0              | 4.14E-21  | -Inf      | down      | -                                                                                                  |
| c51740.graph_c0 | 0.07567624    | 0.11362802    | 0.2431174     | 5.15912346     | 4.46838753     | 5.95531723     | 9.934E-16 | 4.142689  | up        | hypothetical protein MIMGU_mgv1a007527mg [Erythranthe guttata]                                     |
| c51743.graph_c0 | 1.02070686    | 0.40869158    | 1.04931898    | 11.2841008     | 29.0883988     | 33.6357588     | 3.468E-05 | 3.863838  | up        | -                                                                                                  |

| #ID             | 0 h-1<br>FPKM | 0 h-2<br>FPKM | 0 h-3<br>FPKM | 48 h-1<br>FPKM | 48 h-2<br>FPKM | 48 h-3<br>FPKM | FDR       | log2FC    | regulated | nr_annotation                                                               |
|-----------------|---------------|---------------|---------------|----------------|----------------|----------------|-----------|-----------|-----------|-----------------------------------------------------------------------------|
| c51745.graph_c0 | 8.36342989    | 3.88525739    | 5.99713366    | 0              | 0              | 0              | 2.835E-19 | -Inf      | down      | predicted protein [Physcomitrella patens]                                   |
| c51746.graph_c0 | 5.83269513    | 6.01469841    | 5.75066147    | 67.1682399     | 53.3429174     | 52.3878992     | 1.429E-15 | 2.284077  | up        | PREDICTED: scarecrow-like protein 8 [Sesamum indicum]                       |
| c51751.graph_c0 | 5.70270474    | 4.1100589     | 5.56943304    | 0              | 0              | 0              | 3.982E-19 | -Inf      | down      | 30S ribosomal protein S28e [Mucor circinelloides f. circinelloides 1006PhL] |
| c51753.graph_c0 | 0             | 0             | 0             | 25.2398736     | 22.9989233     | 23.1650171     | 8.289E-38 | Inf       | up        | Putative non-specific lipid-transfer protein AKCS9 [Aegilops tauschii]      |
| c51754.graph_c0 | 47.5834595    | 48.0071422    | 40.6035074    | 16.4580967     | 15.7244115     | 17.6552962     | 1.337E-60 | -2.466093 | down      | PREDICTED: uncharacterized protein LOC105174255 [Sesamum indicum]           |
| c51757.graph_c0 | 3.0903147     | 4.29640164    | 4.41241859    | 0.31633327     | 0.16755837     | 0.84441433     | 5.3E-12   | -4.176272 | down      | -                                                                           |
| c51758.graph_c0 | 21.0961927    | 18.8902051    | 15.3976124    | 5.5070484      | 6.4880915      | 6.2405352      | 1.299E-30 | -2.620024 | down      | PREDICTED: uncharacterized protein LOC105123074 [Populus euphratica]        |
| c51759.graph_c0 | 0.12874747    | 0.0644382     | 0.41361399    | 9.72606646     | 5.96854187     | 5.01310103     | 1.175E-06 | 4.070444  | up        | PREDICTED: uncharacterized protein LOC105158157 [Sesamum indicum]           |
| c51760.graph_c0 | 4.71381345    | 4.58746325    | 4.54307769    | 2.01049649     | 2.30026742     | 2.64761297     | 2.941E-09 | -2.013181 | down      | PREDICTED: uncharacterized protein LOC105156249 [Sesamum indicum]           |
| c51762.graph_c0 | 1.31728368    | 2.63720549    | 3.2162472     | 14.441455      | 11.5706499     | 8.63860157     | 0.0051535 | 1.255528  | up        | PREDICTED: cyclic dof factor 1 [Sesamum indicum]                            |
| c51765.graph_c0 | 3.75401154    | 3.91219954    | 3.63456082    | 13.454754      | 16.461997      | 17.1148431     | 9.069E-05 | 1.036254  | up        | PREDICTED: arogenate dehydrogenase 2, chloroplastic-like [Sesamum indicum]  |
| c51766.graph_c0 | 5.09288097    | 5.74681463    | 6.54455368    | 36.7673886     | 42.2943761     | 40.0782642     | 4.046E-13 | 1.754824  | up        | PREDICTED: microsomal glutathione S-transferase 3 [Sesamum indicum]         |
| c51767.graph_c0 | 6.03785111    | 4.80412334    | 2.98418374    | 0              | 0              | 0              | 2.568E-16 | -Inf      | down      | predicted protein [Physcomitrella patens]                                   |
| c51779.graph_c0 | 0.05179035    | 0.15552663    | 0.06655265    | 18.1308066     | 21.0270387     | 22.1612114     | 1.602E-51 | 6.788751  | up        | PREDICTED: acid phosphatase 1-like [Sesamum indicum]                        |
| c51780.graph_c0 | 0             | 0.10174174    | 0             | 11.1428462     | 13.5900482     | 19.7463571     | 7.018E-17 | 7.759918  | up        | hypothetical protein M569_05207, partial [Genlisea aurea]                   |
| c51782.graph_c0 | 44.2094699    | 43.083568     | 45.3394835    | 25.1616883     | 32.5677352     | 30.4033576     | 1.575E-19 | -1.611802 | down      | PREDICTED: uncharacterized protein LOC105172990 [Sesamum indicum]           |
| c51784.graph_c0 | 0.68817575    | 1.23995673    | 0.53059985    | 9.89028118     | 7.52234621     | 6.54382228     | 3.759E-05 | 2.278427  | up        | -                                                                           |
| c51786.graph_c0 | 0.12946236    | 0.194388      | 0.41591065    | 3.51844052     | 4.29594161     | 5.94299947     | 1.141E-08 | 3.181868  | up        | PREDICTED: uncharacterized protein LOC100256155 [Vitis vinifera]            |
| c51793.graph_c0 | 2.95948388    | 2.73009854    | 3.20649647    | 3.47491221     | 1.86894136     | 1.76003649     | 0.0014626 | -1.329731 | down      | PREDICTED: uncharacterized protein LOC105170241 [Sesamum indicum]           |
| c51794.graph_c0 | 22.7299907    | 25.0232962    | 23.0149428    | 18.8506685     | 16.8338316     | 17.1993208     | 5.312E-18 | -1.435386 | down      | PREDICTED: uncharacterized protein LOC105156609 [Sesamum indicum]           |
| c51795.graph_c0 | 22.8768532    | 24.6376892    | 20.3421322    | 1.92879826     | 2.442026       | 1.88367047     | 1.026E-96 | -4.458112 | down      | PREDICTED: E3 ubiquitin-protein ligase ATL4-like [Sesamum indicum]          |
| c51799.graph_c0 | 14.9477272    | 11.2514754    | 12.2510403    | 14.6382746     | 6.49016627     | 4.5828875      | 1.757E-05 | -1.576786 | down      | PREDICTED: uncharacterized protein LOC105166323 [Sesamum indicum]           |

| #ID             | 0 h-1<br>FPKM | 0 h-2<br>FPKM | 0 h-3<br>FPKM | 48 h-1<br>FPKM | 48 h-2<br>FPKM | 48 h-3<br>FPKM | FDR       | log2FC    | regulated | nr_annotation                                                                                                            |
|-----------------|---------------|---------------|---------------|----------------|----------------|----------------|-----------|-----------|-----------|--------------------------------------------------------------------------------------------------------------------------|
| c51802.graph_c0 | 1.59199747    | 1.45699805    | 1.34436957    | 16.6360231     | 11.7640303     | 8.50126043     | 0.0004231 | 2.064063  | up        | hypothetical protein MIMGU_mgv1a010707mg [Erythranthe guttata]                                                           |
| c51805.graph_c0 | 1.85048995    | 2.43729334    | 1.8773312     | 0.62808128     | 1.42580562     | 2.55480204     | 0.0044515 | -1.452085 | down      | -                                                                                                                        |
| c51806.graph_c0 | 0.74150419    | 0.90461316    | 1.13152391    | 4.95263467     | 10.7874288     | 9.4404819      | 5.913E-05 | 2.146752  | up        | PREDICTED: uncharacterized protein LOC105177377 [Sesamum indicum]                                                        |
| c51807.graph_c0 | 0.10023988    | 0.0668935     | 0.08587481    | 1.75460273     | 2.3479438      | 2.30076731     | 3.347E-09 | 3.639244  | up        | PREDICTED: uncharacterized protein LOC105172555 [Sesamum indicum]                                                        |
| c51809.graph_c0 | 13.9807256    | 13.1026311    | 14.3153673    | 2.05258268     | 2.06573934     | 3.10483873     | 7.724E-42 | -3.540269 | down      | PREDICTED: LOW QUALITY PROTEIN: myb-like protein AA [Sesamum indicum]                                                    |
| c51812.graph_c0 | 0             | 0.27372327    | 0.35139338    | 2.01535578     | 2.57982197     | 2.68987719     | 1.412E-05 | 2.507183  | up        | PREDICTED: calmodulin-like protein 1 [Sesamum indicum]                                                                   |
| c51816.graph_c0 | 9.10935506    | 9.20615436    | 9.45475077    | 0.40346789     | 0.34194024     | 0.28720264     | 7.21E-35  | -5.762258 | down      | hypothetical protein Csa_5G205920 [Cucumis sativus]                                                                      |
| c51818.graph_c0 | 1.42221111    | 1.63299336    | 1.39757462    | 10.0194337     | 11.553339      | 10.869725      | 4.606E-09 | 1.846163  | up        | PREDICTED: FACT complex subunit SPT16-like [Sesamum indicum]                                                             |
| c51820.graph_c0 | 18.3593667    | 15.1198768    | 16.8364752    | 4.07469928     | 5.29400448     | 4.51495156     | 2.486E-26 | -2.878604 | down      | PREDICTED: uncharacterized protein LOC105171189 [Sesamum indicum]                                                        |
| c51821.graph_c0 | 1.29892749    | 1.74348778    | 1.44155872    | 10.7427138     | 12.9652436     | 15.2456845     | 7.092E-17 | 2.096914  | up        | PREDICTED: bifunctional aspartate aminotransferase and glutamate/aspartate-prephenate aminotransferase [Sesamum indicum] |
| c51827.graph_c0 | 0             | 0             | 0.13961939    | 7.60724682     | 7.42272224     | 6.05636853     | 1.396E-13 | 6.190838  | up        | PREDICTED: photosystem I reaction center subunit psaK, chloroplastic [Malus domestica]                                   |
| c51832.graph_c0 | 0.11793678    | 0.23610976    | 0.15155343    | 1.90139349     | 2.58980894     | 3.19034287     | 1.546E-06 | 2.901402  | up        | PREDICTED: RAN GTPase-activating protein 2-like isoform X1 [Sesamum indicum]                                             |
| c51833.graph_c0 | 2.89418265    | 2.4731177     | 2.99345358    | 12.9738735     | 14.0542663     | 12.3831176     | 5.853E-07 | 1.217905  | up        | PREDICTED: uncharacterized CRM domain-containing protein At3g25440, chloroplastic [Sesamum indicum]                      |
| c51834.graph_c0 | 53.7006178    | 49.0866426    | 49.0977161    | 8.03755093     | 11.010531      | 11.0975656     | 3.594E-52 | -3.355551 | down      | unnamed protein product [Coffea canephora]                                                                               |
| c51835.graph_c0 | 60.1854436    | 70.9537485    | 54.5188385    | 48.03153       | 54.7353272     | 50.4429556     | 2.794E-15 | -1.294771 | down      | hyponeucal protein CICLE_v10001854mg [Citrus clementina]                                                                 |
| c51837.graph_c0 | 36.9800656    | 37.5546882    | 34.5561356    | 23.7136192     | 20.3669255     | 21.8549387     | 9.819E-32 | -1.7406   | down      | PREDICTED: protein MOS2 [Sesamum indicum]                                                                                |
| c51840.graph_c0 | 1.04933545    | 1.47054068    | 1.48328136    | 15.3707886     | 11.7773646     | 11.4403716     | 3.147E-07 | 2.254833  | up        | PREDICTED: putative DNA-binding protein ESCAROLA [Populus euphratica]                                                    |
| c51841.graph_c0 | 8.05330231    | 3.9531701     | 4.37834367    | 0              | 0              | 0              | 6.783E-17 | -Inf      | down      | uncharacterized protein LOC100191800 [Zea mays]                                                                          |
| c51842.graph_c0 | 4.90721966    | 5.70869569    | 4.77208658    | 2.56588831     | 1.81216502     | 2.17439237     | 1.944E-06 | -2.242821 | down      | -                                                                                                                        |
| c51844.graph_c0 | 0             | 0             | 0             | 8.01874622     | 18.0441088     | 19.0773555     | 1.75E-16  | Inf       | up        | hypothetical protein MIMGU_mgv1a004963mg [Erythranthe guttata]                                                           |
| c51845.graph_c0 | 15.8772504    | 17.3494934    | 16.988865     | 11.4220044     | 10.5568321     | 14.000369      | 9.56E-13  | -1.4996   | down      | PREDICTED: replication protein A 32 kDa subunit A-like isoform X2 [Sesamum indicum]                                      |
| c51847.graph_c0 | 0.31437334    | 0.47203221    | 0.80796439    | 35.0441688     | 64.2784913     | 80.5322589     | 2.773E-13 | 5.779703  | up        | PREDICTED: S-antigen protein-like [Sesamum indicum]                                                                      |

| #ID             | 0 h-1<br>FPKM | 0 h-2<br>FPKM | 0 h-3<br>FPKM | 48 h-1<br>FPKM | 48 h-2<br>FPKM | 48 h-3<br>FPKM | FDR       | log2FC    | regulated | nr_annotation                                                                                           |
|-----------------|---------------|---------------|---------------|----------------|----------------|----------------|-----------|-----------|-----------|---------------------------------------------------------------------------------------------------------|
| c51849.graph_c0 | 21.8346699    | 20.3599879    | 21.3565645    | 16.9124135     | 15.7788691     | 13.452504      | 1.445E-20 | -1.476619 | down      | PREDICTED: uncharacterized protein LOC104243797 [Nicotiana sylvestris]                                  |
| c51856.graph_c0 | 45.6076529    | 38.5013656    | 45.1416546    | 0.32911288     | 1.04596557     | 0.78091377     | 3.37E-123 | -6.940199 | down      | -                                                                                                       |
| c51857.graph_c0 | 4.34570843    | 4.93564499    | 3.00698859    | 0.07699135     | 0              | 0              | 3.245E-26 | -8.274586 | down      | -                                                                                                       |
| c51858.graph_c0 | 1.25155202    | 0.8816037     | 1.25089525    | 13.5799115     | 18.0054568     | 19.11293       | 4.622E-22 | 2.880833  | up        | PREDICTED: LRR receptor-like serine/threonine-protein kinase HSL2 [Sesamum indicum]                     |
| c51860.graph_c0 | 0.55774897    | 0.37220498    | 0.47781967    | 17.1278243     | 22.6810663     | 17.6786727     | 2.049E-13 | 4.331074  | up        | -                                                                                                       |
| c51862.graph_c0 | 0.19860467    | 0             | 0             | 3.96429755     | 3.81202863     | 4.55849665     | 1.724E-11 | 4.959896  | up        | PREDICTED: 65-kDa microtubule-associated protein 3 [Sesamum indicum]                                    |
| c51863.graph_c0 | 1.62342693    | 1.40545085    | 1.74787038    | 105.339223     | 125.85386      | 143.868315     | 3.907E-80 | 5.271846  | up        | -                                                                                                       |
| c51865.graph_c0 | 92.9783406    | 98.260481     | 95.5279859    | 11.1771629     | 10.5491198     | 11.7536218     | 3.27E-125 | -4.115747 | down      | PREDICTED: ethylene-responsive transcription factor 14-like [Sesamum indicum]                           |
| c51866.graph_c0 | 1426.45982    | 1423.86615    | 1367.47214    | 118.50651      | 106.328042     | 112.974904     | 1.74E-135 | -4.657531 | down      | hypothetical protein M569_15403, partial [Genlisea aurea]                                               |
| c51869.graph_c0 | 9.83560339    | 5.21229826    | 5.20435167    | 0              | 0              | 0              | 1.828E-15 | -Inf      | down      | predicted protein [Hordeum vulgare subsp. vulgare]                                                      |
| c51870.graph_c0 | 737.950664    | 768.931021    | 704.285105    | 31.593638      | 38.693724      | 36.8131096     | 1.17E-220 | -5.387977 | down      | PREDICTED: zinc finger A20 and AN1 domain-containing stress-associated protein 1-like [Sesamum indicum] |
| c51872.graph_c0 | 0.85324734    | 0.72756814    | 0.73097107    | 9.46191878     | 13.4472537     | 13.0302667     | 4.455E-23 | 2.935978  | up        | PREDICTED: amino-acid permease BAT1 homolog isoform X1 [Sesamum indicum]                                |
| c51875.graph_c0 | 20.1945219    | 17.9838373    | 19.9306514    | 1.08945334     | 0.75463242     | 0.74568387     | 5.12E-117 | -5.497988 | down      | hypothetical protein MIMGU_mgv1a017259mg [Erythranthe guttata]                                          |
| c51887.graph_c0 | 6.61988652    | 3.15915266    | 4.3523246     | 0              | 0              | 0              | 7.882E-19 | -Inf      | down      | predicted protein [Physcomitrella patens]                                                               |
| c51894.graph_c0 | 1.73999691    | 2.40077573    | 1.81294453    | 11.0910177     | 13.3100806     | 15.4969757     | 6.759E-09 | 1.723413  | up        | PREDICTED: activating signal integrator 1 [Sesamum indicum]                                             |
| c51895.graph_c0 | 0.27571083    | 0.18399127    | 0             | 5.41872636     | 5.78533105     | 7.38299864     | 2.327E-15 | 4.334341  | up        | PREDICTED: cyclin-D1-1-like [Sesamum indicum]                                                           |
| c51898.graph_c0 | 0.12030896    | 0.36128828    | 0             | 3.99011244     | 5.16638259     | 4.14210773     | 6.43E-08  | 3.78062   | up        | PREDICTED: uncharacterized protein LOC105163238 [Sesamum indicum]                                       |
| c51905.graph_c0 | 28.3646374    | 24.1678855    | 30.4832163    | 4.58854134     | 7.16791991     | 8.16571298     | 9.44E-38  | -3.086578 | down      | PREDICTED: cysteine proteinase inhibitor isoform X4 [Sesamum indicum]                                   |
| c51906.graph_c0 | 0             | 0             | 0             | 4.17701284     | 9.29258108     | 9.8956629      | 8.274E-12 | Inf       | up        | PREDICTED: uncharacterized protein At1g28695-like [Sesamum indicum]                                     |
| c51908.graph_c0 | 1.7674532     | 1.34460951    | 0.99934883    | 8.72765141     | 9.31488755     | 10.3157798     | 2.286E-05 | 1.771562  | up        | hypothetical protein MIMGU_mgv1a014525mg [Erythranthe guttata]                                          |
| c51910.graph_c0 | 3.46672274    | 4.16423297    | 4.32759381    | 20.9876387     | 26.3906231     | 26.2257388     | 2.16E-07  | 1.59842   | up        | PREDICTED: uncharacterized protein LOC105168519 isoform X2 [Sesamum indicum]                            |
| c51913.graph_c0 | 2.28435017    | 1.82155877    | 1.79114059    | 13.3046721     | 13.9813248     | 17.7417567     | 3.033E-13 | 1.914344  | up        | PREDICTED: uncharacterized protein LOC105168217 [Sesamum indicum]                                       |

| #ID             | 0 h-1<br>FPKM | 0 h-2<br>FPKM | 0 h-3<br>FPKM | 48 h-1<br>FPKM | 48 h-2<br>FPKM | 48 h-3<br>FPKM | FDR       | log2FC    | regulated | nr_annotation                                                                         |
|-----------------|---------------|---------------|---------------|----------------|----------------|----------------|-----------|-----------|-----------|---------------------------------------------------------------------------------------|
| c51919.graph_c0 | 0.45510028    | 0.075926      | 0             | 8.94438537     | 9.84562813     | 9.9483254      | 5.313E-16 | 4.758655  | up        | PREDICTED: F-box/kelch-repeat protein At5g26960 [Sesamum indicum]                     |
| c51920.graph_c0 | 0.04566381    | 0.13712861    | 0.05867981    | 16.07016       | 18.6287783     | 17.7429017     | 6.532E-50 | 6.745501  | up        | PREDICTED: protein TIFY 6B [Sesamum indicum]                                          |
| c51924.graph_c0 | 5.64326574    | 3.71214521    | 6.21584563    | 0              | 0              | 0              | 6.278E-21 | -Inf      | down      | -                                                                                     |
| c51926.graph_c0 | 0             | 0.15227936    | 0.13032617    | 4.48477896     | 9.9475727      | 12.6366763     | 8.344E-08 | 5.541344  | up        | PREDICTED: WD repeat-containing protein RUP2-like [Sesamum indicum]                   |
| c51927.graph_c0 | 0.31568965    | 0.13543104    | 0.28976693    | 56.504871      | 68.6189944     | 85.8417695     | 1.392E-51 | 7.129186  | up        | geranyl diphosphate synthase large subunit [Anurmmum maiale]                          |
| c51928.graph_c0 | 2.82190608    | 2.01766556    | 3.62626103    | 25.6258502     | 19.278646      | 27.4281649     | 6.111E-05 | 2.075776  | up        | Tubulin beta-8 chain -like protein [Gossypium arboreum]                               |
| c51931.graph_c0 | 10.5402208    | 9.80476082    | 7.6615925     | 7.06206465     | 5.92277593     | 7.94200308     | 2.786E-05 | -1.433834 | down      | PREDICTED: histone H3.2-like [Oryza brachyantha]                                      |
| c51933.graph_c0 | 0.14304274    | 0.09545732    | 0.3063593     | 6.06189385     | 6.79412216     | 8.71612741     | 3.502E-17 | 4.274865  | up        | hypothetical protein MIMGU_mgv1a008682mg [Erythranthe guttata]                        |
| c51936.graph_c0 | 0             | 0             | 0             | 1.75218096     | 2.54371337     | 2.25200457     | 1.685E-11 | Inf       | up        | hypothetical protein MIMGU_mgv1a013390mg [Erythranthe guttata]                        |
| c51938.graph_c0 | 0             | 0.21471573    | 0.2756422     | 3.26060225     | 4.50094384     | 5.71461145     | 1.533E-08 | 3.742267  | up        | PREDICTED: ABC transporter B family member 15-like [Sesamum indicum]                  |
| c51939.graph_c0 | 0.09201314    | 0.09210528    | 0.11824053    | 1.61060167     | 6.01673107     | 6.10954725     | 0.0004301 | 4.466443  | up        | PREDICTED: uncharacterized protein LOC105163738 [Sesamum indicum]                     |
| c51940.graph_c0 | 0             | 0             | 0             | 36.2341444     | 57.0116464     | 52.0344023     | 4.865E-46 | Inf       | up        | PREDICTED: kirola-like isoform X2 [Sesamum indicum]                                   |
| c51942.graph_c0 | 19.6257528    | 23.2457581    | 22.506975     | 15.2711992     | 11.9808653     | 9.29383052     | 9.113E-19 | -1.850385 | down      | PREDICTED: set1/Ash2 histone methyltransferase complex subunit ASH2 [Sesamum indicum] |
| c51943.graph_c0 | 34.3959697    | 34.9382352    | 34.4213813    | 5.42151334     | 5.05026268     | 5.57258634     | 1.64E-60  | -3.709823 | down      | PREDICTED: ethylene-responsive transcription factor ERF008-like [Sesamum indicum]     |
| c51947.graph_c0 | 0.14468401    | 0.25345056    | 0.09296234    | 33.0231791     | 44.0213071     | 40.8289896     | 1.33E-102 | 6.890839  | up        | PREDICTED: aldehyde dehydrogenase family 2 member C4-like [Sesamum indicum]           |
| c51950.graph_c0 | 16.5715046    | 15.6070819    | 13.7387352    | 6.36114623     | 3.6085525      | 3.87078467     | 1.838E-40 | -2.734685 | down      | PREDICTED: U-box domain-containing protein 26-like [Sesamum indicum]                  |
| c51952.graph_c0 | 201.161257    | 176.738909    | 238.706451    | 45.5364767     | 49.8109924     | 64.0751082     | 1.762E-22 | -2.975013 | down      | -                                                                                     |
| c51953.graph_c0 | 3.72458321    | 3.976867      | 3.03128336    | 0.22875527     | 0.60584617     | 1.11949783     | 1.543E-10 | -3.48992  | down      | -                                                                                     |
| c51958.graph_c0 | 7.06947151    | 3.6076532     | 5.16572495    | 0              | 0              | 0              | 7.596E-17 | -Inf      | down      | predicted protein [Physcomitrella patens]                                             |
| c51961.graph_c0 | 41.4160875    | 41.0272042    | 41.4352777    | 8.05351998     | 8.74152446     | 7.04849867     | 4.13E-78  | -3.394738 | down      | PREDICTED: protein ABSCISIC ACID-INSENSITIVE 5 [Sesamum indicum]                      |
| c51962.graph_c0 | 0.56948567    | 0.24430968    | 0.31363356    | 14.3903272     | 26.9166119     | 25.9423019     | 1.922E-14 | 4.874541  | up        | -                                                                                     |
| c51963.graph_c0 | 1.22193814    | 0.78631825    | 1.53285224    | 34.0935103     | 38.077168      | 55.2109308     | 3.684E-18 | 4.142132  | up        | PREDICTED: D-3-phosphoglycerate dehydrogenase 2, chloroplastic-like [Sesamum indicum] |
| c51965.graph_c0 | 0.07411406    | 0             | 0             | 26.4238597     | 56.4197487     | 90.2804189     | 3.387E-10 | 10.17895  | up        | PREDICTED: subtilisin-like protease [Sesamum indicum]                                 |
| c51967.graph_c0 | 5.16119783    | 4.25998599    | 3.60706404    | 4.46286871     | 3.53485476     | 3.30300937     | 0.0001318 | -1.214282 | down      | -                                                                                     |

| #ID             | 0 h-1<br>FPKM | 0 h-2<br>FPKM | 0 h-3<br>FPKM | 48 h-1<br>FPKM | 48 h-2<br>FPKM | 48 h-3<br>FPKM | FDR       | log2FC    | regulated | nr_annotation                                                                                           |
|-----------------|---------------|---------------|---------------|----------------|----------------|----------------|-----------|-----------|-----------|---------------------------------------------------------------------------------------------------------|
| c51971.graph_c0 | 1.48248172    | 1.07924814    | 0.17318615    | 25.3286187     | 30.2524415     | 39.882099      | 3.635E-18 | 4.116653  | up        | PREDICTED: UDP-glucose 6-dehydrogenase 3 [Nicotiana sylvestris]                                         |
| c51972.graph_c0 | 47.7576768    | 49.4687654    | 46.5616854    | 18.8631201     | 22.755725      | 26.1870087     | 7.69E-43  | -2.105992 | down      | PREDICTED: transcription factor G1E1-like [Sesamum indicum]                                             |
| c51974.graph_c0 | 14.6783689    | 12.8137213    | 15.5723517    | 6.60409506     | 6.82966084     | 5.59646102     | 6.472E-09 | -2.195985 | down      | hypothetical protein MIMGU_mgv1a0003262mg, partial [Erythranthe guttata]                                |
| c51975.graph_c0 | 0             | 0             | 0             | 8.09246058     | 20.1540249     | 28.7393277     | 9.256E-09 | Inf       | up        | PREDICTED: vacuolar iron transporter homolog 2-like [Sesamum indicum]                                   |
| c51977.graph_c0 | 1.39335026    | 2.78949097    | 1.79051024    | 25.3876483     | 21.757862      | 16.3712427     | 4.561E-08 | 2.398944  | up        | unnamed protein product [Coffea canephora]                                                              |
| c51983.graph_c0 | 2.59302187    | 3.91991348    | 3.12812745    | 22.4747931     | 21.2269626     | 21.1691815     | 4.115E-12 | 1.733817  | up        | hypothetical protein MIMGU_mgv1a013022mg [Erythranthe guttata]                                          |
| c51984.graph_c0 | 4.90800446    | 3.94113289    | 4.22775585    | 21.96193       | 33.4251384     | 37.1378696     | 1.355E-07 | 1.798085  | up        | PREDICTED: uncharacterized protein LOC105164204 [Sesamum indicum]                                       |
| c51985.graph_c0 | 6.94982616    | 8.52451164    | 6.66665485    | 1.71338071     | 1.8151191      | 1.68503541     | 9.138E-14 | -3.103107 | down      | PREDICTED: zinc finger protein 3 [Solanum lycopersicum]                                                 |
| c51987.graph_c0 | 0.78242579    | 1.34264446    | 0.57454178    | 15.1372551     | 17.5633326     | 16.309448      | 9.017E-12 | 3.167503  | up        | PREDICTED: KRM1-interacting protein 4 [Sesamum indicum]                                                 |
| c51988.graph_c0 | 4.89561213    | 4.31909739    | 4.26512232    | 33.9408441     | 30.5303845     | 35.7779028     | 2.277E-13 | 1.879099  | up        | PREDICTED: thioredoxin F1, chloroplastic-like [Sesamum indicum]                                         |
| c51992.graph_c0 | 0.4492542     | 0.14990135    | 0             | 2.62125437     | 3.9461227      | 4.29648279     | 4.757E-07 | 3.174073  | up        | PREDICTED: cucumber peeling cupredoxin-like [Sesamum indicum]                                           |
| c51995.graph_c0 | 5.28104004    | 2.67158522    | 3.64857287    | 0              | 0              | 0              | 1.048E-18 | -Inf      | down      | --                                                                                                      |
| c52000.graph_c0 | 1.30455013    | 1.89942755    | 0.76199935    | 34.6347476     | 24.7695315     | 23.5265149     | 3.331E-11 | 3.382249  | up        | PREDICTED: probable serine/threonine-protein kinase DDB_G0282963 isoform X2 [Nicotiana tomentosiformis] |
| c52001.graph_c0 | 1.90659104    | 1.93928246    | 2.7661798     | 14.2217897     | 17.2571723     | 21.7797928     | 6.169E-11 | 1.98293   | up        | PREDICTED: kynurenine--oxoglutarate transaminase 1-like [Sesamum indicum]                               |
| c52003.graph_c0 | 16.1798278    | 8.14178779    | 9.32817679    | 0              | 0              | 0              | 2.851E-18 | -Inf      | down      | -                                                                                                       |
| c52004.graph_c0 | 0.116696      | 0             | 0             | 4.62284262     | 2.8472914      | 2.58281847     | 2.541E-06 | 5.443466  | up        | hypothetical protein MIMGU_mgv1a000070mg [Erythranthe guttata]                                          |
| c52006.graph_c0 | 0             | 0             | 0             | 3.64916726     | 3.60226953     | 3.68978077     | 3.131E-12 | Inf       | up        | PREDICTED: probable leucine-rich repeat receptor-like protein kinase At5g49770 [Sesamum indicum]        |
| c52011.graph_c0 | 3.68857871    | 3.69227227    | 3.87815701    | 0.51487262     | 2.72722555     | 1.74089614     | 5.941E-06 | -2.215351 | down      | -                                                                                                       |
| c52012.graph_c0 | 18.7140174    | 20.116707     | 19.2893641    | 9.09792792     | 9.05986237     | 9.39052661     | 4.665E-29 | -2.094729 | down      | PREDICTED: RING-H2 finger protein ATL52-like [Sesamum indicum]                                          |
| c52015.graph_c0 | 9.05995962    | 8.54437707    | 10.3915697    | 36.8355219     | 47.4265487     | 51.4350368     | 9.506E-11 | 1.252674  | up        | PREDICTED: uncharacterized protein LOC105168722 [Sesamum indicum]                                       |
| c52017.graph_c0 | 10.854695     | 11.0497265    | 8.27466016    | 2.09040657     | 2.7532023      | 2.2622001      | 3.694E-25 | -3.104836 | down      | hypothetical protein MIMGU_mgv1a014249mg [Erythranthe guttata]                                          |
| c52018.graph_c0 | 2.24672554    | 1.12448765    | 0.36089141    | 20.1808436     | 18.9123309     | 22.1006686     | 1.071E-07 | 3.031035  | up        | hypothetical protein JCGZ_17967 [Jatropha curcas]                                                       |



| #ID             | 0 h-1<br>FPKM | 0 h-2<br>FPKM | 0 h-3<br>FPKM | 48 h-1<br>FPKM | 48 h-2<br>FPKM | 48 h-3<br>FPKM | FDR       | log2FC    | regulated | nr_annotation                                                                                 |
|-----------------|---------------|---------------|---------------|----------------|----------------|----------------|-----------|-----------|-----------|-----------------------------------------------------------------------------------------------|
| c52023.graph_c0 | 11.0624211    | 9.50093058    | 9.25278932    | 0.3618257      | 0.63885076     | 0.37560872     | 1.472E-45 | -5.460557 | down      | -                                                                                             |
| c52024.graph_c0 | 0.17635922    | 0             | 0.67988574    | 18.6844659     | 19.9660471     | 25.0102721     | 2.1E-17   | 5.174279  | up        | Chlorophyll a-b binding protein 151 [Morus notabilis]                                         |
| c52026.graph_c0 | 1.28557144    | 1.96415282    | 1.56506229    | 7.10611357     | 7.19788735     | 10.4273658     | 0.0009252 | 1.339862  | up        | PREDICTED: uncharacterized protein LOC105168444 [Sesamum indicum]                             |
| c52029.graph_c0 | 0.18194257    | 0.31871832    | 0.05845085    | 34.9063154     | 11.3201047     | 12.3417421     | 0.0005715 | 5.726406  | up        | PREDICTED: epidermis-specific secreted glycoprotein EP1-like [Vitis vinifera]                 |
| c52032.graph_c0 | 19.9690778    | 20.7203814    | 20.698726     | 11.3778223     | 12.596676      | 10.8653879     | 3.87E-29  | -1.835762 | down      | PREDICTED: cyclin-dependent kinase r-1 [Sesamum indicum]                                      |
| c52038.graph_c0 | 0.54335573    | 0.54389982    | 0.34911681    | 11.2629316     | 9.54536824     | 9.13087201     | 2.844E-07 | 3.372222  | up        | PREDICTED: uncharacterized protein LOC104246111 isoform X2 [Nicotiana glauca]                 |
| c52040.graph_c0 | 0.47198428    | 0.52495212    | 0.4717366     | 30.0510804     | 29.8393608     | 24.1169306     | 1.15E-49  | 4.822674  | up        | PREDICTED: transmembrane protein 87A-like [Sesamum indicum]                                   |
| c52041.graph_c0 | 9.28622104    | 10.302041     | 7.14469554    | 3.81436354     | 3.63677009     | 3.00611229     | 3.72E-16  | -2.366066 | down      | PREDICTED: protein MKS1 [Sesamum indicum]                                                     |
| c52044.graph_c0 | 0.5181383     | 0.20746285    | 0             | 2.10030829     | 3.4386703      | 2.37852578     | 7.692E-05 | 2.442197  | up        | PREDICTED: LOW QUALITY PROTEIN: BTB/POZ domain-containing protein At1g63850 [Sesamum indicum] |
| c52046.graph_c0 | 1.00309849    | 1.09823759    | 0.92648404    | 83.5750801     | 95.8189225     | 121.234347     | 7.759E-52 | 5.612995  | up        | PREDICTED: serine carboxypeptidase 1 [Sesamum indicum]                                        |
| c52048.graph_c0 | 4.26825674    | 1.67550226    | 3.22639935    | 0              | 0              | 0              | 2.862E-11 | -Inf      | down      | tamavidin1 [Pleurotus cornucopiae]                                                            |
| c52049.graph_c0 | 0.84173703    | 0.96294846    | 1.5452363     | 6.64682619     | 7.04150638     | 7.93502718     | 4.424E-05 | 1.6645    | up        | PREDICTED: serine/threonine-protein kinase BLUS1 [Sesamum indicum]                            |
| c52052.graph_c0 | 12.045374     | 14.2846053    | 11.8309166    | 8.41108996     | 8.94796912     | 6.91811008     | 1.783E-18 | -1.668381 | down      | PREDICTED: 5'-adenylylsulfate reductase-like 5 isoform X2 [Sesamum indicum]                   |
| c52053.graph_c0 | 33.9792454    | 28.0625141    | 30.3159903    | 3.63194387     | 1.95433861     | 1.64148918     | 3.38E-110 | -4.678023 | down      | PREDICTED: uncharacterized protein LOC105180043 [Sesamum indicum]                             |
| c52056.graph_c0 | 2.08753852    | 1.23611849    | 1.54908951    | 0              | 0              | 0              | 1.193E-25 | -Inf      | down      | putative Bax inhibitor 1 [Auxenochlorella protothecoides]                                     |
| c52057.graph_c0 | 0             | 0             | 0             | 3.68075033     | 5.10397313     | 4.34018578     | 3.151E-23 | Inf       | up        | hypothetical protein MIMGU_mgv1a003539mg [Erythranthe guttata]                                |
| c52060.graph_c0 | 0             | 0             | 0             | 272.066919     | 258.565274     | 300.994284     | 8.7E-238  | Inf       | up        | --                                                                                            |
| c52063.graph_c0 | 19.3204518    | 14.8711328    | 14.1065599    | 15.5743528     | 15.5706154     | 12.3581857     | 9.97E-08  | -1.164069 | down      | PREDICTED: uncharacterized protein LOC105166059 [Sesamum indicum]                             |
| c52067.graph_c0 | 0.33936995    | 0             | 0             | 5.62769519     | 5.13382446     | 5.42478012     | 4.511E-09 | 4.581021  | up        | PREDICTED: protein KADIALIS-like 3 [Sesamum indicum]                                          |
| c52068.graph_c0 | 1.05107943    | 0.61374362    | 1.57579179    | 64.716249      | 61.8056988     | 76.5395034     | 2.025E-77 | 4.94437   | up        | PREDICTED: outer envelope pore protein 16, chloroplastic [Nicotiana tomentosiformis]          |
| c52074.graph_c0 | 0.83946836    | 0.31511586    | 0.26968752    | 2.2234474      | 2.76512038     | 3.18265977     | 0.0075911 | 1.506717  | up        | -                                                                                             |
| c52075.graph_c0 | 3.46153174    | 4.33124742    | 2.38296714    | 1.02503212     | 2.05113923     | 2.63486142     | 0.0001228 | -1.859142 | down      | -                                                                                             |
| c52081.graph_c0 | 61.5450933    | 66.7713567    | 76.5621209    | 27.387712      | 26.9757892     | 27.189024      | 1.237E-27 | -2.348254 | down      | PREDICTED: probable cyclic nucleotide-gated ion channel 17 [Sesamum indicum]                  |
| c52084.graph_c0 | 75.9287299    | 78.5947004    | 82.9932558    | 4.03384263     | 3.10790338     | 2.24330557     | 1.72E-233 | -5.671912 | down      | PREDICTED: transcription factor TGA5-like [Sesamum indicum]                                   |

| #ID             | 0 h-1<br>FPKM | 0 h-2<br>FPKM | 0 h-3<br>FPKM | 48 h-1<br>FPKM | 48 h-2<br>FPKM | 48 h-3<br>FPKM | FDR       | log2FC    | regulated | nr_annotation                                                                                                       |
|-----------------|---------------|---------------|---------------|----------------|----------------|----------------|-----------|-----------|-----------|---------------------------------------------------------------------------------------------------------------------|
| c52087.graph_c0 | 0             | 0             | 0.32263993    | 2.85277001     | 4.3290456      | 3.4988448      | 2.856E-09 | 3.992838  | up        | hypothetical protein MIMGU_mgv1a014873mg [Erythranthe guttata]                                                      |
| c52089.graph_c0 | 17.250026     | 17.7537021    | 15.9227505    | 8.58010631     | 10.0380604     | 10.8211122     | 4.624E-24 | -1.810623 | down      | PREDICTED: uncharacterized protein LOC105176476 isoform X2 [Sesamum indicum]                                        |
| c52090.graph_c0 | 0.12362613    | 0.37124978    | 0.15886448    | 21.4117821     | 14.1166641     | 15.8091685     | 3.049E-15 | 5.287872  | up        | hypothetical protein glysoja_014339 [Glycine soja]                                                                  |
| c52091.graph_c0 | 6.74689105    | 4.890572      | 4.18552792    | 0              | 0              | 0              | 1.411E-19 | -Inf      | down      | -                                                                                                                   |
| c52094.graph_c0 | 4.14557806    | 4.8136859     | 5.11414265    | 2.90257444     | 1.78022012     | 2.17489961     | 4.015E-05 | -2.048129 | down      | -                                                                                                                   |
| c52096.graph_c0 | 4.60135206    | 4.33097695    | 4.94214173    | 1.70828018     | 3.15024587     | 3.74374665     | 1.027E-08 | -1.719498 | down      | PREDICTED: pentatricopeptide repeat-containing protein At1g77405 [Sesamum indicum]                                  |
| c52098.graph_c0 | 47.7270132    | 45.610789     | 53.2106072    | 35.8494829     | 28.727085      | 31.2170591     | 1.621E-15 | -1.628466 | down      | PREDICTED: putative lipid transfer protein family protein [Cucumis                                                  |
| c52102.graph_c0 | 47.4168469    | 48.1497331    | 51.4736859    | 26.4939591     | 29.7378001     | 34.238669      | 1.694E-16 | -1.722203 | down      | PREDICTED: transcription factor ILK3-like [Sesamum indicum]                                                         |
| c52103.graph_c0 | 0.64829814    | 0.64894731    | 0.29403133    | 12.928804      | 13.5104064     | 12.8794469     | 1.089E-26 | 3.616381  | up        | PREDICTED: brefeldin A-inhibited guanine nucleotide-exchange protein 2 [Sesamum indicum]                            |
| c52105.graph_c0 | 10.541357     | 9.50716875    | 7.64480675    | 4.99992131     | 5.19494862     | 7.35779602     | 1.785E-06 | -1.675784 | down      | PREDICTED: ABC transporter C family member 5-like [Sesamum indicum]                                                 |
| c52106.graph_c0 | 6.04812392    | 4.88041057    | 5.07564323    | 0.45485112     | 0.18069735     | 0.15177142     | 1.702E-28 | -5.340653 | down      | PREDICTED: ethylene-responsive transcription factor ERF054-like [Sesamum indicum]                                   |
| c52108.graph_c0 | 35.6084285    | 35.644085     | 33.0370699    | 10.7534429     | 19.4672886     | 30.8851767     | 6.4E-15   | -1.800519 | down      | -                                                                                                                   |
| c52109.graph_c0 | 0             | 0             | 0             | 3.73897472     | 2.871718       | 4.40816532     | 6.715E-12 | Inf       | up        | PREDICTED: serine/threonine-protein kinase D6PK-like [Sesamum indicum]                                              |
| c52110.graph_c0 | 181.367503    | 177.293589    | 183.896985    | 4.0268712      | 4.38285797     | 2.89591864     | 0         | -6.601087 | down      | PREDICTED: oleosin 1 [Sesamum indicum]                                                                              |
| c52113.graph_c0 | 0             | 0             | 0             | 68.7876291     | 78.456225      | 68.8283574     | 4.964E-73 | Inf       | up        | -                                                                                                                   |
| c52114.graph_c0 | 12.5223818    | 12.214426     | 10.6516456    | 87.309837      | 84.7168966     | 82.382862      | 1.554E-35 | 1.830829  | up        | PREDICTED: protein rough sheath 2 homolog [Sesamum indicum]                                                         |
| c52117.graph_c0 | 0.04752541    | 0.09514599    | 0.06107203    | 3.02106182     | 5.28769781     | 5.99957806     | 2.412E-11 | 5.106669  | up        | PREDICTED: serine/threonine protein phosphatase 2A 57 kDa regulatory subunit B&apos; iota isoform [Sesamum indicum] |
| c52118.graph_c0 | 0             | 0.32407226    | 0.03782083    | 16.8922395     | 11.9780602     | 10.3501333     | 2.187E-16 | 5.75774   | up        | PREDICTED: MLO-like protein 6 [Sesamum indicum]                                                                     |
| c52120.graph_c0 | 0.32428432    | 0.05410151    | 0.2083591     | 10.9044433     | 10.6024613     | 9.79131724     | 8.186E-22 | 4.722071  | up        | PREDICTED: probable pectinesterase/pectinesterase inhibitor 12 [Sesamum indicum]                                    |
| c52127.graph_c0 | 6.36372991    | 4.39996751    | 5.31125389    | 0              | 0              | 0              | 3.505E-38 | -Inf      | down      | NADH dehydrogenase subunit 1 (mitochondrion) [Micromonas pusilla CCMP1545]                                          |
| c52129.graph_c0 | 0             | 0             | 0             | 11.1730666     | 19.8261531     | 21.5404096     | 2.641E-22 | Inf       | up        | PREDICTED: peroxidase 60 [Sesamum indicum]                                                                          |
| c52131.graph_c0 | 1.60464789    | 0.62853445    | 1.34480613    | 15.5543532     | 19.1334888     | 20.9318273     | 3.672E-17 | 2.93566   | up        | PREDICTED: uncharacterized protein LOC105174462 isoform X1 [Sesamum indicum]                                        |
| c52132.graph_c0 | 2.72443107    | 2.0094857     | 3.50100178    | 2.5099236      | 1.11956198     | 0.82280024     | 0.0002901 | -1.889124 | down      | -                                                                                                                   |
| c52133.graph_c0 | 10.6526597    | 9.22787887    | 8.95055847    | 0.7549173      | 0.59980751     | 0.67172087     | 4.286E-18 | -4.84303  | down      | -                                                                                                                   |

| #ID             | 0 h-1<br>FPKM | 0 h-2<br>FPKM | 0 h-3<br>FPKM | 48 h-1<br>FPKM | 48 h-2<br>FPKM | 48 h-3<br>FPKM | FDR       | log2FC    | regulated | nr_annotation                                                                                     |
|-----------------|---------------|---------------|---------------|----------------|----------------|----------------|-----------|-----------|-----------|---------------------------------------------------------------------------------------------------|
| c52136.graph_c0 | 52.1327056    | 62.5931119    | 51.5990727    | 14.8321915     | 15.0114393     | 16.4969936     | 1.248E-56 | -2.861202 | down      | PREDICTED: cell division cycle protein 48 homolog [Nicotiana tomentosiformis]                     |
| c52137.graph_c0 | 6.85728129    | 4.94857168    | 4.71333007    | 0              | 0              | 0              | 6.591E-23 | -Inf      | down      | rpl13 protein isoform 1 [Lichtheimia corymbifera JMRC:FSU:9682]                                   |
| c52139.graph_c0 | 32.2669683    | 40.9124198    | 30.8678915    | 6.60587463     | 4.54878006     | 6.1717609      | 1.364E-19 | -3.597476 | down      | PREDICTED: ethylene-responsive transcription factor ERF008-like [Sesamum indicum]                 |
| c52140.graph_c0 | 54.1557491    | 43.2526419    | 48.1223224    | 201.513368     | 216.852659     | 206.697074     | 1.689E-11 | 1.084701  | up        | PREDICTED: 60S ribosomal protein L11-2 [Sesamum indicum]                                          |
| c52153.graph_c0 | 0.06339357    | 0.1269141     | 0             | 26.8066518     | 25.3048898     | 28.4773722     | 9.373E-58 | 7.723748  | up        | PREDICTED: probable 3-beta-hydroxysteroid-Delta(8),Delta(7)-isomerase [Sesamum indicum]           |
| c52155.graph_c0 | 17.9292118    | 15.781128     | 13.5060586    | 122.742553     | 92.0171918     | 103.133975     | 6.685E-10 | 1.74112   | up        | hypothetical protein MIMGU_mgv1a013595mg [Erythranthe guttata]                                    |
| c52157.graph_c0 | 0.30978149    | 0.41345559    | 0.39808148    | 11.7961579     | 10.0779024     | 12.9508952     | 5.213E-13 | 3.938886  | up        | PREDICTED: choline transporter-like protein 2 [Sesamum indicum]                                   |
| c52158.graph_c0 | 6.61206508    | 6.61868606    | 7.33405014    | 67.1984839     | 76.3511808     | 84.7254945     | 3.7E-43   | 2.450772  | up        | PREDICTED: 50S ribosomal protein L12, chloroplastic-like [Sesamum indicum]                        |
| c52160.graph_c0 | 6.08778224    | 3.14850375    | 2.34691236    | 0              | 0              | 0              | 3.179E-09 | -Inf      | down      | -                                                                                                 |
| c52161.graph_c0 | 0             | 0.09388372    | 0             | 5.35712751     | 6.5905862      | 7.07322686     | 6.202E-14 | 6.652406  | up        | PREDICTED: non-specific lipid-transfer protein-like protein At2g13820 [Sesamum indicum]           |
| c52162.graph_c0 | 0             | 0.38492448    | 0             | 25.5069214     | 24.7696995     | 26.4785562     | 8.184E-14 | 6.633866  | up        | -                                                                                                 |
| c52163.graph_c0 | 46.0414579    | 56.0951462    | 42.9369556    | 49.2030171     | 36.7183357     | 35.5851751     | 1.096E-07 | -1.26547  | down      | PREDICTED: trihelix transcription factor ASIL2 [Sesamum indicum]                                  |
| c52165.graph_c0 | 23.8591949    | 21.9913567    | 20.4906008    | 2.82919214     | 2.19025132     | 3.58245121     | 2.803E-38 | -3.962698 | down      | hypothetical protein MIMGU_mgv1a011603mg [Erythranthe guttata]                                    |
| c52171.graph_c0 | 0.27723418    | 0.27751178    | 0.71251379    | 17.4953251     | 17.0460301     | 27.0438099     | 3.412E-14 | 4.570807  | up        | enolase [Prunus armeniaca]                                                                        |
| c52173.graph_c0 | 12.3555667    | 11.1271425    | 9.58295692    | 4.86253568     | 6.92689304     | 6.55553789     | 3.249E-28 | -1.871136 | down      | PREDICTED: pentatricopeptide repeat-containing protein At3g09650, chloroplastic [Sesamum indicum] |
| c52175.graph_c0 | 19.5522181    | 20.6951228    | 18.3587173    | 12.2868622     | 12.8479431     | 12.1003542     | 3.177E-22 | -1.671312 | down      | PREDICTED: mitogen-activated protein kinase kinase kinase 1-like [Sesamum indicum]                |
| c52177.graph_c0 | 9.61483347    | 8.85450437    | 9.94613055    | 3.36596845     | 6.05253646     | 8.86683105     | 3.526E-11 | -1.666284 | down      | PREDICTED: dnaJ protein ERDJ3A [Sesamum indicum]                                                  |
| c52178.graph_c0 | 0.06774029    | 0.06780812    | 0.08704895    | 6.98955844     | 6.2145663      | 6.60797126     | 1.649E-15 | 5.457362  | up        | PREDICTED: protein MIZU-KUSSEI 1 [Sesamum indicum]                                                |
| c52179.graph_c0 | 16.4029273    | 16.0772825    | 12.7348733    | 6.61125786     | 7.00382604     | 7.84354331     | 3.479E-06 | -2.092058 | down      | hypothetical protein MIMGU_mgv1a0261451mg, partial [Erythranthe guttata]                          |
| c52180.graph_c0 | 0.69492397    | 1.39123967    | 0.66975362    | 8.80287776     | 8.98646953     | 9.68412443     | 3.731E-05 | 2.302286  | up        | -                                                                                                 |
| c52181.graph_c0 | 1.34331797    | 0.67233155    | 1.23301198    | 24.2206631     | 39.5183836     | 48.7659425     | 2.916E-11 | 4.085432  | up        | Alpha-xylosidase, partial [Medicago truncatula]                                                   |
| c52192.graph_c0 | 17.2179607    | 12.6796419    | 19.1041815    | 9.92267752     | 9.2534099      | 10.2592106     | 7.66E-08  | -1.754512 | down      | hypothetical protein MIMGU_mgv1a015849mg [Erythranthe guttata]                                    |

| #ID             | 0 h-1<br>FPKM | 0 h-2<br>FPKM | 0 h-3<br>FPKM | 48 h-1<br>FPKM | 48 h-2<br>FPKM | 48 h-3<br>FPKM | FDR       | log2FC    | regulated | nr_annotation                                                                  |
|-----------------|---------------|---------------|---------------|----------------|----------------|----------------|-----------|-----------|-----------|--------------------------------------------------------------------------------|
| c52194.graph_c0 | 18.0588731    | 12.3008874    | 12.495736     | 0              | 0              | 0              | 4.988E-42 | -Inf      | down      | --                                                                             |
| c52196.graph_c0 | 1.16834006    | 1.75426497    | 1.87670404    | 63.7738009     | 59.578765      | 63.6890922     | 1.365E-21 | 4.264354  | up        | PREDICTED: aldo-keto reductase family 4 member C9-like [Sesamum indicum]       |
| c52197.graph_c0 | 19.237124     | 20.7376476    | 20.2834592    | 10.9061498     | 8.66530743     | 8.62597909     | 3.686E-11 | -2.108637 | down      | PREDICTED: splicing factor 5B subunit 2 [Sesamum indicum]                      |
| c52199.graph_c0 | 4.31632389    | 2.19890022    | 3.16951262    | 0              | 0              | 0              | 1.253E-20 | -Inf      | down      | --                                                                             |
| c52205.graph_c0 | 0             | 0.34088406    | 0.43761132    | 66.3017083     | 82.7574913     | 78.9079534     | 5.557E-88 | 7.159419  | up        | -                                                                              |
| c52213.graph_c0 | 0             | 0.1486544     | 0.1908357     | 4.78845967     | 6.66709857     | 5.96503967     | 9.292E-10 | 4.645243  | up        | hypothetical protein MIMGU_mgv1a0183231mg, partial [Erythranthe guttata]       |
| c52214.graph_c0 | 3.15333585    | 2.59946518    | 3.81379897    | 0              | 0              | 0              | 2.216E-22 | -Inf      | down      | PREDICTED: uncharacterized protein LOC105178332 [Sesamum indicum]              |
| c52215.graph_c0 | 0             | 0.71665974    | 0.46000744    | 5.27658588     | 4.54179612     | 5.67321488     | 4.196E-06 | 2.696637  | up        | -                                                                              |
| c52217.graph_c0 | 0.43598431    | 0.52370505    | 0.11205142    | 3.29358887     | 6.38260617     | 6.64749385     | 7.677E-06 | 2.910994  | up        | PREDICTED: zinc finger protein JACKDAW-like [Sesamum indicum]                  |
| c52218.graph_c0 | 158.251382    | 160.732572    | 149.09039     | 35.9134475     | 21.7405388     | 23.5862538     | 2.326E-57 | -3.533587 | down      | -                                                                              |
| c52220.graph_c0 | 11.7609519    | 14.333564     | 14.7023535    | 3.89534672     | 1.56049696     | 0.96117522     | 4.306E-41 | -3.664359 | down      | PREDICTED: transcription factor MYB44-like [Sesamum indicum]                   |
| c52228.graph_c0 | 0             | 0             | 0.1042535     | 2.46645248     | 4.03812951     | 3.19219576     | 7.767E-11 | 5.482071  | up        | NAC domain-containing protein 1 [Salvia miltiorrhiza]                          |
| c52232.graph_c0 | 14.1648219    | 14.5200816    | 15.3875595    | 84.3961097     | 99.2888201     | 103.944138     | 4.174E-30 | 1.684636  | up        | PREDICTED: cytochrome c1-2, heme protein, mitochondrial-like [Sesamum indicum] |
| c52233.graph_c0 | 234.458802    | 248.35368     | 215.778928    | 137.094545     | 145.869261     | 189.21132      | 4.021E-29 | -1.584654 | down      | PREDICTED: probable calcium-binding protein CML18 [Sesamum indicum]            |
| c52235.graph_c0 | 0             | 0             | 0             | 64.1222638     | 84.093455      | 55.0147355     | 5.871E-43 | Inf       | up        | PREDICTED: pathogenesis-related protein STH-2-like [Sesamum indicum]           |
| c52237.graph_c0 | 22.6625815    | 26.6021566    | 18.2276357    | 6.00812899     | 7.00137256     | 9.08819498     | 4.665E-17 | -2.630228 | down      | -                                                                              |
| c52239.graph_c0 | 4.56232354    | 5.04761749    | 4.01136647    | 3.2076366      | 3.2809261      | 3.54306508     | 0.0012297 | -1.458015 | down      | -                                                                              |
| c52242.graph_c0 | 5.30590483    | 2.65560895    | 4.61237791    | 3.30668674     | 2.28458716     | 3.19811954     | 0.0020384 | -1.530312 | down      | -                                                                              |
| c52248.graph_c0 | 9.2696467     | 7.38250543    | 7.30362403    | 0              | 0              | 0              | 3.966E-51 | -Inf      | down      | -                                                                              |
| c52251.graph_c0 | 17.6023506    | 16.5380483    | 14.2861374    | 0.99574592     | 1.50696009     | 3.54403492     | 1.728E-23 | -4.029812 | down      | PREDICTED: dynamin-related protein 4C-like [Sesamum indicum]                   |
| c52252.graph_c0 | 6.68791822    | 3.01914017    | 4.54989161    | 0              | 0              | 0              | 3.835E-13 | -Inf      | down      | --                                                                             |
| c52253.graph_c0 | 12.0430756    | 7.90500647    | 9.13327607    | 0.63659071     | 0              | 0.16183845     | 5.72E-32  | -6.161473 | down      | hypothetical protein L484_021523 [Morus notabilis]                             |
| c52257.graph_c0 | 9.27455744    | 7.17387985    | 6.22995433    | 0              | 0              | 0              | 2.328E-23 | -Inf      | down      | 60S ribosomal protein L45 [Momonium roreri MCA 70071]                          |
| c52260.graph_c0 | 0.13731092    | 0.54979367    | 0.70579988    | 14.5474742     | 18.6275531     | 14.9703124     | 6.603E-14 | 4.080744  | up        | PREDICTED: uncharacterized protein LOC105162704 [Sesamum indicum]              |
| c52262.graph_c0 | 0.56132979    | 0.56189188    | 0.24044367    | 18.0996766     | 16.8004378     | 15.644841      | 5.111E-12 | 4.204362  | up        | hypothetical protein MIMGU_mgv1a010766mg [Erythranthe guttata]                 |

| #ID             | 0 h-1<br>FPKM | 0 h-2<br>FPKM | 0 h-3<br>FPKM | 48 h-1<br>FPKM | 48 h-2<br>FPKM | 48 h-3<br>FPKM | FDR       | log2FC    | regulated | nr_annotation                                                                             |
|-----------------|---------------|---------------|---------------|----------------|----------------|----------------|-----------|-----------|-----------|-------------------------------------------------------------------------------------------|
| c52267.graph_c0 | 7.57177698    | 3.15806624    | 5.6758527     | 0              | 0              | 0              | 5.123E-12 | -Inf      | down      | -                                                                                         |
| c52269.graph_c0 | 5.31268265    | 4.78022696    | 6.13663599    | 44.9843914     | 46.8981467     | 49.1772313     | 3.993E-28 | 2.098986  | up        | PREDICTED: probable protein Pop3 [Sesamum indicum]                                        |
| c52272.graph_c0 | 0             | 0             | 0             | 22.0460207     | 34.8452883     | 29.267274      | 2.094E-33 | Inf       | up        | -                                                                                         |
| c52273.graph_c0 | 28.8567249    | 28.4654661    | 26.2945332    | 20.8810712     | 21.5064918     | 21.7625114     | 1.064E-11 | -1.399464 | down      | hypothetical protein MIMGU_mgv1a000759mg [Erythranthe guttata]                            |
| c52275.graph_c0 | 0             | 0.07901046    | 0             | 3.49040507     | 3.00434952     | 3.62336502     | 3.51E-11  | 5.996334  | up        | -                                                                                         |
| c52276.graph_c0 | 8.31860792    | 11.0629316    | 9.00992415    | 2.18961263     | 4.17533233     | 4.96817558     | 1.696E-09 | -2.353876 | down      | -                                                                                         |
| c52278.graph_c0 | 3.93935063    | 2.55154401    | 3.87111057    | 18.3594153     | 23.5204154     | 22.7945544     | 0.0003272 | 1.618744  | up        | -                                                                                         |
| c52279.graph_c0 | 9.20084667    | 9.09774212    | 7.06523366    | 2.27416148     | 1.09509015     | 4.50696479     | 3.537E-11 | -2.703267 | down      | PREDICTED: 8-hydroxygeraniol dehydrogenase-like [Sesamum indicum]                         |
| c52290.graph_c0 | 0.49356867    | 0.39525032    | 1.01480845    | 10.1854514     | 14.2585456     | 19.7442914     | 5.319E-09 | 3.501597  | up        | hypothetical protein MIMGU_mgv1a011727mg [Erythranthe guttata]                            |
| c52293.graph_c0 | 6.16745921    | 6.51661471    | 6.8246752     | 2.20961444     | 1.08680862     | 1.75544789     | 1.04E-12  | -2.957719 | down      | PREDICTED: putative calcium-binding protein CML23 [Sesamum indicum]                       |
| c52298.graph_c0 | 1.16670308    | 1.07803509    | 0.80729365    | 11.575232      | 14.5398863     | 13.904422      | 7.333E-10 | 2.695029  | up        | PREDICTED: LOW QUALITY PROTEIN: uncharacterized protein LOC105174495 [Sesamum indicum]    |
| c52301.graph_c0 | 0.28142714    | 0.28170895    | 0.09041125    | 9.52813713     | 9.54457773     | 9.86225531     | 4.1E-16   | 4.460299  | up        | hypothetical protein MIMGU_mgv1a015992mg [Erythranthe guttata]                            |
| c52303.graph_c0 | 6.84236587    | 5.47937397    | 4.10326515    | 2.10121124     | 1.46278589     | 0.37392903     | 1.22E-12  | -3.057501 | down      | PREDICTED: MATE efflux family protein DTX1 [Sesamum indicum]                              |
| c52307.graph_c0 | 3.54989601    | 3.95725191    | 4.25072804    | 0.96625329     | 2.28347828     | 3.83588071     | 9.092E-05 | -1.765638 | down      | PREDICTED: probable L-type lectin-domain containing receptor kinase S.7 [Sesamum indicum] |
| c52309.graph_c0 | 0.67481098    | 0.50661503    | 0.65036912    | 3.73007935     | 3.29297232     | 3.04241866     | 0.0069066 | 1.443143  | up        | PREDICTED: trihelix transcription factor GTL1-like isoform X1 [Glycine max]               |
| c52310.graph_c0 | 8.72220717    | 4.91115439    | 5.90441527    | 0              | 0              | 0              | 1.053E-23 | -Inf      | down      | unknown [Picea sitchensis]                                                                |
| c52312.graph_c0 | 5.99810416    | 4.36662571    | 3.92397158    | 1.40657867     | 0.31930705     | 0.35759007     | 1.262E-13 | -3.762146 | down      | -                                                                                         |
| c52313.graph_c0 | 6.34669649    | 6.47464125    | 5.3851405     | 53.7979103     | 54.6806599     | 59.0210787     | 1.069E-44 | 2.185125  | up        | PREDICTED: LRR receptor-like serine/threonine-protein kinase GSO1 [Sesamum indicum]       |
| c52320.graph_c0 | 1.44784459    | 1.44929438    | 0.37210752    | 14.6723376     | 18.539231      | 18.514871      | 3.017E-18 | 2.972949  | up        | PREDICTED: coatomer subunit alpha-1-like [Nicotiana glauca]                               |
| c52322.graph_c0 | 0             | 0             | 0             | 35.2458726     | 43.5777249     | 40.7220327     | 4.37E-116 | Inf       | up        | hypothetical protein MIMGU_mgv1a018712mg, partial [Erythranthe guttata]                   |
| c52323.graph_c0 | 97.8367903    | 87.5534244    | 108.864589    | 2.53249032     | 5.36573282     | 4.09708119     | 7.522E-91 | -5.646905 | down      | PREDICTED: putative defensin-like protein 120 [Solanum lycopersicum]                      |
| c52327.graph_c0 | 42.8914015    | 45.0568116    | 39.4175844    | 27.9986378     | 31.6122947     | 32.8255932     | 4.641E-26 | -1.481347 | down      | PREDICTED: F-box/kelch-repeat protein At5g60570 [Sesamum indicum]                         |

| #ID             | 0 h-1<br>FPKM | 0 h-2<br>FPKM | 0 h-3<br>FPKM | 48 h-1<br>FPKM | 48 h-2<br>FPKM | 48 h-3<br>FPKM | FDR       | log2FC    | regulated | nr_annotation                                                                                                                     |
|-----------------|---------------|---------------|---------------|----------------|----------------|----------------|-----------|-----------|-----------|-----------------------------------------------------------------------------------------------------------------------------------|
| c52330.graph_c0 | 0.21002589    | 1.051181      | 0.53978317    | 7.35260291     | 4.09957433     | 5.8536385      | 0.0003909 | 2.254973  | up        | hypothetical protein MIMGU_mgv1a020446mg, partial [Erythranthe guttata]                                                           |
| c52334.graph_c0 | 2.39493683    | 1.71238214    | 1.86853596    | 0              | 0              | 0              | 1.516E-19 | -Inf      | down      | Serpin-ZX [Aegilops tauschii]                                                                                                     |
| c52335.graph_c0 | 3.07006869    | 2.42616544    | 3.01077986    | 15.4814812     | 13.7987097     | 12.3845505     | 0.0003022 | 1.277174  | up        | PREDICTED: uncharacterized protein LOC105167003 isoform X1 [Sesamum indicum]                                                      |
| c52336.graph_c0 | 0             | 0             | 0             | 64.0579967     | 126.912356     | 105.101956     | 1.114E-29 | Inf       | up        | hypothetical protein MIMGU_mgv1a020596mg [Erythranthe guttata]                                                                    |
| c52337.graph_c0 | 0.57999647    | 0.11611545    | 0.14906369    | 3.09911738     | 3.84919754     | 3.61337546     | 1.766E-05 | 2.63278   | up        | PREDICTED: uncharacterized protein LOC105167330 [Sesamum indicum]                                                                 |
| c52338.graph_c0 | 9.35784155    | 10.6363182    | 10.9390501    | 6.8968432      | 5.47977682     | 5.69135891     | 1.963E-11 | -1.790043 | down      | unnamed protein product [Coffea canephora]                                                                                        |
| c52343.graph_c0 | 4.27145965    | 3.39110166    | 5.48899476    | 46.0005143     | 49.0194712     | 45.338004      | 9.196E-29 | 2.39394   | up        | PREDICTED: uncharacterized protein LOC105158873 [Sesamum indicum]                                                                 |
| c52347.graph_c0 | 1.47105848    | 1.32527837    | 1.41777629    | 41.5379534     | 45.7990589     | 54.6866568     | 9.357E-55 | 4.054149  | up        | PREDICTED: LIM domain-containing protein WLIM1 [Sesamum indicum]                                                                  |
| c52349.graph_c0 | 7.56385219    | 8.29251445    | 9.25699955    | 4.20311002     | 5.74162067     | 5.51143456     | 1.233E-05 | -1.725017 | down      | -                                                                                                                                 |
| c52354.graph_c0 | 3.56132927    | 3.46004554    | 2.28822456    | 1.64046441     | 1.73787312     | 2.5758977      | 0.0004531 | -1.662087 | down      | hypothetical protein MIMGU_mgv1a024937mg [Erythranthe guttata]                                                                    |
| c52357.graph_c0 | 50.7529527    | 54.7072751    | 44.6514604    | 13.0297409     | 8.35022343     | 6.53641383     | 4.529E-91 | -3.431399 | down      | hypothetical protein MIMGU_mgv1a001601mg [Erythranthe guttata]                                                                    |
| c52360.graph_c0 | 0.48871037    | 0.48919974    | 0.94201826    | 6.75347802     | 5.00814374     | 6.40981774     | 7.944E-05 | 2.221205  | up        | hypothetical protein MIMGU_mgv1a0032971mg, partial [Erythranthe guttata]                                                          |
| c52362.graph_c0 | 16.5844453    | 13.7952405    | 19.8108471    | 11.8355916     | 11.8544628     | 14.5522564     | 0.0002778 | -1.414084 | down      | -                                                                                                                                 |
| c52366.graph_c0 | 0.27867893    | 0.092986      | 0.11937115    | 2.48179303     | 4.07972915     | 5.40648968     | 4.45E-06  | 3.585656  | up        | PREDICTED: myosin-9-like [Sesamum indicum]                                                                                        |
| c52369.graph_c0 | 37.9097464    | 40.601043     | 38.6896386    | 35.4317572     | 34.9486681     | 39.7674325     | 1.764E-13 | -1.107664 | down      | -                                                                                                                                 |
| c52371.graph_c0 | 1003.62253    | 984.370931    | 1005.92888    | 2.91012897     | 2.98658725     | 2.9940114      | 0         | -9.413554 | down      | hypothetical protein MIMGU_mgv1a015982mg [Erythranthe guttata]                                                                    |
| c52372.graph_c0 | 0.36126166    | 0.28929873    | 0.37138843    | 14.876956      | 22.7766752     | 27.7778649     | 2.569E-17 | 4.973197  | up        | PREDICTED: ATP synthase gamma chain, chloroplastic-like [Sesamum indicum]                                                         |
| c52377.graph_c0 | 0.08936731    | 0.0447284     | 0             | 17.5365014     | 17.7928195     | 18.4975496     | 1.03E-54  | 7.649017  | up        | PREDICTED: uncharacterized protein LOC105168503 isoform X2 [Sesamum indicum]                                                      |
| c52380.graph_c0 | 4.44109999    | 3.27065249    | 3.95412831    | 15.9273563     | 17.9876563     | 23.0653623     | 2.262E-07 | 1.266771  | up        | PREDICTED: LOW QUALITY PROTEIN: ATP-dependent Clp protease ATP-binding subunit clpA homolog CD4B, chloroplastic [Sesamum indicum] |
| c52381.graph_c0 | 33.0319057    | 35.7936458    | 31.3203428    | 12.8519889     | 15.8060633     | 11.0412906     | 1.262E-20 | -2.352986 | down      | PREDICTED: importin subunit beta-1-like [Nicotiana glauca]                                                                        |
| c52383.graph_c0 | 12.6465586    | 7.46286027    | 7.80631501    | 0              | 0              | 0              | 2.066E-27 | -Inf      | down      | -                                                                                                                                 |
| c52393.graph_c0 | 0.37908745    | 0.37946704    | 0.24357119    | 152.617915     | 157.055457     | 146.05331      | 3.21E-106 | 7.81599   | up        | -                                                                                                                                 |

| #ID             | 0 h-1<br>FPKM | 0 h-2<br>FPKM | 0 h-3<br>FPKM | 48 h-1<br>FPKM | 48 h-2<br>FPKM | 48 h-3<br>FPKM | FDR       | log2FC    | regulated | nr_annotation                                                                                     |
|-----------------|---------------|---------------|---------------|----------------|----------------|----------------|-----------|-----------|-----------|---------------------------------------------------------------------------------------------------|
| c52394.graph_c0 | 0.37777545    | 0.07563075    | 0             | 68.3533645     | 94.5339246     | 93.9557699     | 1.128E-77 | 8.142259  | up        | PREDICTED: protein RALF-like 34 [Phoenix dactylifera]                                             |
| c52398.graph_c0 | 60.1105209    | 48.6154372    | 58.0001198    | 291.739093     | 304.088779     | 313.892242     | 2.445E-24 | 1.4291    | up        | PREDICTED: uncharacterized protein LOC105159752 [Sesamum indicum]                                 |
| c52401.graph_c0 | 424.357015    | 410.235511    | 394.499635    | 66.4583099     | 54.631873      | 60.7367575     | 2.15E-128 | -3.770705 | down      | unnamed protein product [Coffea canephora]                                                        |
| c52403.graph_c0 | 0             | 0.09781862    | 0.12557506    | 28.4484525     | 39.8656731     | 42.2154717     | 1.992E-44 | 7.913417  | up        | PREDICTED: dirigent protein 22-like [Sesamum indicum]                                             |
| c52404.graph_c0 | 8.48318608    | 10.6789318    | 8.58884786    | 1.89460954     | 1.12899885     | 1.36972239     | 1.25E-16  | -3.666926 | down      | PREDICTED: cyclic pyranopterin monophosphate synthase, mitochondrial [Sesamum indicum]            |
| c52406.graph_c0 | 0             | 0             | 0             | 24.5257615     | 31.0702259     | 39.7358185     | 2.25E-31  | Inf       | up        | hypothetical protein MIMGU_mgv1a016694mg [Erythranthe guttata]                                    |
| c52410.graph_c0 | 4.0525019     | 4.59743452    | 5.3812129     | 4.35566726     | 2.90041796     | 2.65758619     | 0.0013712 | -1.51212  | down      | -                                                                                                 |
| c52413.graph_c0 | 9.06071015    | 5.62952053    | 8.02991122    | 4.60541637     | 4.26902018     | 4.35398878     | 0.0003426 | -1.796685 | down      | -                                                                                                 |
| c52415.graph_c0 | 0             | 0             | 0             | 16.76397       | 25.480869      | 21.6308031     | 7.737E-49 | Inf       | up        | PREDICTED: GDSL esterase/lipase 1-like [Sesamum indicum]                                          |
| c52420.graph_c0 | 0.17839682    | 0             | 0.22924698    | 8.05318864     | 9.14076092     | 12.35714       | 3.029E-16 | 5.148501  | up        | flavonoid glycosyltransferase [Veronica persica]                                                  |
| c52421.graph_c0 | 2.96697983    | 2.90321035    | 2.69886801    | 15.2946171     | 16.3980066     | 15.576633      | 1.324E-10 | 1.446265  | up        | PREDICTED: uncharacterized protein LOC105173356 [Sesamum indicum]                                 |
| c52432.graph_c0 | 0             | 0             | 0             | 10.8054951     | 10.5665648     | 10.3542542     | 5.968E-27 | Inf       | up        | hypothetical protein MIMGU_mgv1a020209mg [Erythranthe guttata]                                    |
| c52437.graph_c0 | 0             | 0             | 0             | 3.73082442     | 6.37317418     | 8.46514608     | 3.539E-12 | Inf       | up        | PREDICTED: probable LRR receptor-like serine/threonine-protein kinase At4g26540 [Sesamum indicum] |
| c52440.graph_c0 | 182.010223    | 202.337482    | 169.066375    | 45.4932229     | 36.427122      | 24.7092688     | 7.22E-110 | -3.384481 | down      | hypothetical protein MIMGU_mgv1a009891mg [Erythranthe guttata]                                    |
| c52441.graph_c0 | 0             | 0             | 0             | 8.40143232     | 22.8441003     | 29.4038062     | 8.139E-08 | Inf       | up        | -                                                                                                 |
| c52442.graph_c0 | 4.62906739    | 4.75564225    | 3.28734822    | 0.89781028     | 1.90224225     | 2.49645683     | 2.1E-06   | -2.286074 | down      | PREDICTED: mitoferrin-like [Sesamum indicum]                                                      |
| c52443.graph_c0 | 0.26852745    | 0.57599215    | 0.19718194    | 23.2188492     | 31.7858819     | 35.5024831     | 4.787E-38 | 5.42282   | up        | PREDICTED: cinnamoyl-CoA reductase 1-like [Sesamum indicum]                                       |
| c52446.graph_c0 | 0.21005617    | 0.77097719    | 0.26993049    | 16.8360174     | 18.1090633     | 18.3096064     | 3.681E-25 | 4.39656   | up        | PREDICTED: vegetative incompatibility protein HET-E-1-like [Sesamum indicum]                      |
| c52454.graph_c0 | 2.04273284    | 1.61429868    | 1.42762754    | 0.03301577     | 0              | 0.08813169     | 1.375E-22 | -6.406813 | down      | PREDICTED: cytochrome P450 80B1-like [Sesamum indicum]                                            |
| c52455.graph_c0 | 2.37234374    | 3.26523901    | 1.90534727    | 19.1236307     | 16.4967509     | 16.7730045     | 0.0006954 | 1.78498   | up        | -                                                                                                 |
| c52456.graph_c0 | 0.24203836    | 0.40380122    | 0             | 5.79751973     | 11.3386508     | 15.277387      | 1.118E-06 | 4.634316  | up        | PREDICTED: uncharacterized protein LOC105159948 [Sesamum indicum]                                 |
| c52457.graph_c0 | 0.61674411    | 0.61736168    | 1.0567208     | 3.59850437     | 4.61474304     | 3.87601756     | 0.0077739 | 1.372616  | up        | PREDICTED: methylsterol monooxygenase 1-1-like [Sesamum indicum]                                  |
| c52460.graph_c0 | 0             | 0             | 0             | 10.8096474     | 13.0274067     | 19.501444      | 1.886E-16 | Inf       | up        | hypothetical protein MIMGU_mgv1a007773mg [Erythranthe guttata]                                    |
| c52461.graph_c0 | 63.6210898    | 64.2637493    | 82.8704685    | 46.8895181     | 42.0533526     | 27.7356552     | 1.678E-10 | -1.868141 | down      | PREDICTED: branchpoint-bridging protein [Sesamum indicum]                                         |

| #ID             | 0 h-1<br>FPKM | 0 h-2<br>FPKM | 0 h-3<br>FPKM | 48 h-1<br>FPKM | 48 h-2<br>FPKM | 48 h-3<br>FPKM | FDR       | log2FC    | regulated | nr_annotation                                                                    |
|-----------------|---------------|---------------|---------------|----------------|----------------|----------------|-----------|-----------|-----------|----------------------------------------------------------------------------------|
| c52462.graph_c0 | 0.31033126    | 0.20709467    | 0.13292932    | 4.09786268     | 3.53352562     | 3.0526774      | 1.97E-06  | 3.031907  | up        | endo-beta-1,4-D-glucanase [Solanum lycopersicum]                                 |
| c52465.graph_c0 | 12.6074591    | 9.96322383    | 11.0849522    | 1.0188433      | 1.07934093     | 0.18131213     | 3.989E-19 | -4.893299 | down      | -                                                                                |
| c52466.graph_c0 | 3.94576305    | 4.42846736    | 2.91935676    | 0              | 0              | 0              | 4.215E-22 | -Inf      | down      | -                                                                                |
| c52471.graph_c0 | 0.20585242    | 0.20605855    | 0.08817617    | 86.9836923     | 125.365057     | 134.039535     | 4.486E-57 | 8.419274  | up        | PREDICTED: bidirectional sugar transporter SWEET14-like [Solanum tuberosum]      |
| c52472.graph_c0 | 15.2130213    | 5.55625516    | 6.60450498    | 0              | 0              | 0              | 7.712E-08 | -Inf      | down      | KECNAME: FUN-40S ribosomal protein S29 [Gomphusia ionanica]                      |
| c52474.graph_c0 | 1.11228281    | 1.94844404    | 1.78665932    | 10.311119      | 8.8879678      | 8.60491008     | 0.0001505 | 1.503261  | up        | PREDICTED: probable E3 ubiquitin-protein ligase XERICO [Sesamum indicum]         |
| c52482.graph_c0 | 50.727242     | 44.5804408    | 45.4768609    | 18.6025534     | 19.0891555     | 22.0891449     | 2.145E-43 | -2.254076 | down      | hypothetical protein MIMGU_mgv1a027140mg [Erythranthe guttata]                   |
| c52484.graph_c0 | 55.6838217    | 43.5560657    | 44.5758162    | 51.019243      | 33.2607394     | 50.6346867     | 1.701E-05 | -1.103379 | down      | histone H4 [Zea mays]                                                            |
| c52487.graph_c0 | 0.07458826    | 0.07466295    | 0             | 8.38329929     | 9.46345557     | 9.29369027     | 3.601E-19 | 6.503462  | up        | PREDICTED: long chain acyl-CoA synthetase 4 [Sesamum indicum]                    |
| c52491.graph_c0 | 18.5394591    | 14.7184325    | 16.9779795    | 3.1411051      | 1.24785749     | 1.9215188      | 2.209E-19 | -3.995274 | down      | PREDICTED: cation/calcium exchanger 3-like [Sesamum indicum]                     |
| c52492.graph_c0 | 0.12258614    | 0             | 0             | 8.92181378     | 4.90525032     | 3.11513752     | 0.0001587 | 6.130744  | up        | PREDICTED: uncharacterized protein LOC105168627 [Sesamum indicum]                |
| c52493.graph_c0 | 9.41343717    | 8.61749037    | 8.0644263     | 4.74380708     | 2.51274419     | 2.70408518     | 2.603E-12 | -2.393019 | down      | PREDICTED: E3 ubiquitin-protein ligase RHA2A-like [Sesamum indicum]              |
| c52496.graph_c0 | 5.86007934    | 6.00396962    | 5.13841377    | 0.88919556     | 1.21113627     | 0.73468651     | 9.288E-18 | -3.602936 | down      | -                                                                                |
| c52500.graph_c0 | 7.01101327    | 5.48846228    | 5.54426438    | 0              | 0              | 0              | 2.796E-33 | -Inf      | down      | -                                                                                |
| c52505.graph_c0 | 8.59357281    | 10.6667007    | 11.0430813    | 2.53342713     | 1.67741178     | 2.53600676     | 2.54E-09  | -3.182043 | down      | PREDICTED: UDP-glycosyltransferase 73C3-like [Sesamum indicum]                   |
| c52506.graph_c0 | 0.10992953    | 0             | 0             | 9.06404587     | 6.00811644     | 3.829812       | 1.44E-07  | 6.441751  | up        | PREDICTED: uncharacterized protein LOC105159772 [Sesamum indicum]                |
| c52508.graph_c0 | 0.30598701    | 0             | 0             | 14.7525151     | 26.7774952     | 30.2666568     | 3.181E-15 | 6.867274  | up        | hypothetical protein MIMGU_mgv1a018889mg [Erythranthe guttata]                   |
| c52510.graph_c0 | 18.9334696    | 18.3259021    | 13.6732029    | 15.2804231     | 14.9660381     | 17.3162062     | 0.0001926 | -1.113687 | down      | PREDICTED: zinc-finger homeodomain protein 1-like [Sesamum indicum]              |
| c52513.graph_c0 | 27.9032811    | 33.2602052    | 29.4875173    | 12.6840407     | 6.80818293     | 5.86881525     | 3.624E-22 | -2.840729 | down      | PREDICTED: cyclin-dependent protein kinase inhibitor SMR3-like [Sesamum indicum] |
| c52514.graph_c0 | 0             | 0             | 0             | 4.44039318     | 5.0525069      | 3.36569661     | 1.485E-11 | Inf       | up        | predicted protein [Hordeum vulgare subsp. vulgare]                               |
| c52517.graph_c0 | 25.6025559    | 27.7638758    | 25.9214469    | 16.0818712     | 15.9010064     | 12.8785971     | 4.082E-10 | -1.837049 | down      | PREDICTED: uncharacterized protein LOC105169022 [Sesamum indicum]                |
| c52518.graph_c0 | 0             | 0             | 0             | 37.6136692     | 49.2111953     | 58.7370713     | 2.619E-34 | Inf       | up        | PREDICTED: protein YLS9 [Sesamum indicum]                                        |
| c52520.graph_c0 | 11.2256034    | 9.39473856    | 8.86803986    | 5.59472157     | 5.92692911     | 6.41125329     | 9.871E-08 | -1.734759 | down      | unnamed protein product [Coffea canephora]                                       |
| c52522.graph_c0 | 21.8215658    | 12.1088506    | 16.6115858    | 0              | 0              | 0              | 1.734E-28 | -Inf      | down      | --                                                                               |



| #ID             | 0 h-1<br>FPKM | 0 h-2<br>FPKM | 0 h-3<br>FPKM | 48 h-1<br>FPKM | 48 h-2<br>FPKM | 48 h-3<br>FPKM | FDR       | log2FC    | regulated | nr_annotation                                                                   |
|-----------------|---------------|---------------|---------------|----------------|----------------|----------------|-----------|-----------|-----------|---------------------------------------------------------------------------------|
| c52531.graph_c0 | 53.8185969    | 32.4843062    | 33.0999924    | 0              | 0              | 0              | 1.148E-38 | -Inf      | down      | uncharacterized protein LOC100191904 [Zea mays]                                 |
| c52533.graph_c0 | 0             | 0             | 0             | 267.008551     | 331.594793     | 267.742052     | 6.85E-138 | Inf       | up        | -                                                                               |
| c52540.graph_c0 | 0.71427591    | 0.35749557    | 0.65562345    | 42.1614064     | 56.5655784     | 50.940054      | 8.643E-84 | 5.413575  | up        | PREDICTED: flavonol synthase/flavanone 3-hydroxylase-like [Sesamum indicum]     |
| c52543.graph_c0 | 5.22098575    | 3.50538729    | 3.68186345    | 2.17032642     | 3.60414771     | 5.63685101     | 0.003201  | -1.147293 | down      | -                                                                               |
| c52546.graph_c0 | 17.3418837    | 13.403977     | 16.3611445    | 5.86478173     | 2.78514918     | 2.87914346     | 7.435E-13 | -3.033091 | down      | -                                                                               |
| c52553.graph_c0 | 51.9726757    | 54.1495753    | 55.6117917    | 34.4753072     | 38.2599787     | 34.9138571     | 2.161E-29 | -1.606605 | down      | hypothetical protein MIMGU_mgv1a011657mg [Erythranthe guttata]                  |
| c52555.graph_c0 | 0.47528673    | 0.88355922    | 0.43625876    | 2.75229515     | 4.57238376     | 5.89980503     | 0.0011951 | 1.856638  | up        | PREDICTED: regulatory protein INPK5-like [Sesamum indicum]                      |
| c52558.graph_c0 | 2.28589468    | 2.37971101    | 2.58496935    | 91.9021428     | 101.642623     | 114.828348     | 7.246E-94 | 4.388985  | up        | eukaryotic translation initiation factor 5A [Quercus suber]                     |
| c52562.graph_c0 | 1.23367469    | 1.67594933    | 1.35884642    | 28.3323583     | 30.0146982     | 28.1715908     | 1.229E-23 | 3.323415  | up        | hypothetical protein MIMGU_mgv1a012628mg [Erythranthe guttata]                  |
| c52564.graph_c0 | 19.8700416    | 10.659967     | 12.572193     | 0              | 0              | 0              | 1.54E-27  | -Inf      | down      | --                                                                              |
| c52569.graph_c0 | 0             | 0             | 0             | 3.24101234     | 3.58952592     | 5.11224992     | 9.898E-12 | Inf       | up        | PREDICTED: protein IQ-DOMAIN 14-like [Sesamum indicum]                          |
| c52571.graph_c0 | 40.9594764    | 46.2112559    | 39.2558675    | 46.8211198     | 30.482739      | 21.672782      | 1.774E-08 | -1.357993 | down      | PREDICTED: uncharacterized protein LOC105157856 [Sesamum indicum]               |
| c52573.graph_c0 | 0.63465124    | 0.4235245     | 0.54370132    | 5.06724504     | 6.81339791     | 8.84419279     | 8.591E-06 | 2.669235  | up        | PREDICTED: microtubule-associated protein 70-2 [Sesamum indicum]                |
| c52580.graph_c0 | 0.08629323    | 0.25913891    | 0.11089021    | 7.39340223     | 3.87409684     | 4.739425       | 2.498E-06 | 4.129225  | up        | hypoteucal protein POF1K_0001810000g [Populus trichocarpa]                      |
| c52587.graph_c0 | 0.13563821    | 0.06788702    | 0             | 1.37454642     | 1.3237866      | 1.16746936     | 1.705E-06 | 3.249873  | up        | -                                                                               |
| c52590.graph_c0 | 0.31192415    | 0.23417737    | 0.40083488    | 24.8570613     | 24.0498306     | 26.9119549     | 2.443E-37 | 5.301442  | up        | PREDICTED: probable serine/threonine-protein kinase At4g35230 [Sesamum indicum] |
| c52595.graph_c0 | 35.4807389    | 34.605594     | 30.5631144    | 27.0597093     | 32.8522944     | 27.3802416     | 1.634E-09 | -1.223731 | down      | -                                                                               |
| c52596.graph_c0 | 6.16315085    | 3.50677268    | 4.41846653    | 0              | 0              | 0              | 1.482E-24 | -Inf      | down      | translationally-controlled tumor protein [Tilletiaria anomala UBC 951]          |
| c52599.graph_c0 | 2.03440068    | 0.29091969    | 0.74693869    | 22.4906712     | 15.3168036     | 25.2533188     | 8.216E-09 | 3.352061  | up        | -                                                                               |
| c52600.graph_c0 | 0             | 0             | 0             | 3.10373576     | 4.72654555     | 7.53709977     | 1.437E-08 | Inf       | up        | PREDICTED: LOW QUALITY PROTEIN: protein E6-like [Sesamum indicum]               |
| c52601.graph_c0 | 21.3518917    | 28.1342055    | 21.2784693    | 3.61299588     | 2.55168736     | 2.85761956     | 3.136E-24 | -3.981677 | down      | -                                                                               |
| c52603.graph_c0 | 0.18287157    | 0             | 0             | 6.90740212     | 12.4933865     | 10.418499      | 5.499E-16 | 6.34385   | up        | -                                                                               |
| c52604.graph_c0 | 14.8941634    | 13.0454429    | 15.949658     | 0.32670178     | 0.69220184     | 0.58139456     | 3.229E-51 | -5.807879 | down      | -                                                                               |
| c52605.graph_c0 | 15.6961061    | 17.2067917    | 15.804943     | 13.6239548     | 13.5183663     | 15.4111948     | 4.35E-14  | -1.212893 | down      | PREDICTED: inositol-tetrakisphosphate 1-kinase 1-like [Sesamum indicum]         |
| c52608.graph_c0 | 1.24514789    | 0.31159868    | 1.00004021    | 7.88639124     | 7.89896568     | 5.6138108      | 0.0001891 | 2.049079  | up        | -                                                                               |
| c52609.graph_c0 | 0             | 0             | 0             | 4.11722145     | 5.35865618     | 9.00169099     | 4.771E-08 | Inf       | up        | -                                                                               |

| #ID             | 0 h-1<br>FPKM | 0 h-2<br>FPKM | 0 h-3<br>FPKM | 48 h-1<br>FPKM | 48 h-2<br>FPKM | 48 h-3<br>FPKM | FDR       | log2FC    | regulated | nr_annotation                                                                    |
|-----------------|---------------|---------------|---------------|----------------|----------------|----------------|-----------|-----------|-----------|----------------------------------------------------------------------------------|
| c52610.graph_c0 | 113.926978    | 111.547765    | 102.007316    | 71.4345869     | 71.9770233     | 78.9643263     | 3.755E-29 | -1.575593 | down      | PREDICTED: cysteine proteinase inhibitor 1-like [Sesamum indicum]                |
| c52611.graph_c0 | 16.3868986    | 12.6622023    | 9.05116543    | 67.9350591     | 52.8894678     | 55.9705621     | 2.836E-05 | 1.206518  | up        | PREDICTED: trihelix transcription factor GT-2-like [Sesamum indicum]             |
| c52612.graph_c0 | 0             | 0.41012795    | 0             | 5.2844211      | 5.59820339     | 3.52653459     | 1.462E-08 | 4.131127  | up        | -                                                                                |
| c52616.graph_c0 | 0             | 0             | 0             | 14.2985597     | 17.6532067     | 13.0097523     | 1.881E-22 | Inf       | up        | PREDICTED: reucunne oxidase-like protein [Sesamum indicum]                       |
| c52620.graph_c0 | 0             | 0             | 0             | 10.1749662     | 12.7389871     | 18.8388534     | 1.331E-15 | Inf       | up        | PREDICTED: probable pectate lyase 8 [Sesamum indicum]                            |
| c52621.graph_c0 | 7.67071966    | 5.04975904    | 5.50581139    | 0              | 0              | 0              | 1.064E-36 | -Inf      | down      | -                                                                                |
| c52622.graph_c0 | 21.3740828    | 19.0840621    | 19.097236     | 0.21818503     | 0.11557029     | 0.04853493     | 5.04E-126 | -8.280453 | down      | PREDICTED: LOW QUALITY PROTEIN: EID1-like F-box protein 3 [Sesamum indicum]      |
| c52626.graph_c0 | 0.04404217    | 0             | 0.16978778    | 29.1730771     | 48.5716713     | 45.5980391     | 2.672E-38 | 8.124436  | up        | PREDICTED: probable pectinesterase/pectinesterase inhibitor 46 [Sesamum indicum] |
| c52631.graph_c0 | 28.0337786    | 25.6098439    | 22.5007491    | 6.35216002     | 11.4221748     | 10.932378      | 2.687E-28 | -2.432667 | down      | hypothetical protein MIMGU_mgv1a017584mg [Erythranthe guttata]                   |
| c52638.graph_c0 | 0.7246657     | 0.45336959    | 0.34920904    | 57.7482054     | 54.988774      | 62.8934291     | 1.252E-75 | 5.833927  | up        | hypothetical protein MIMGU_mgv1a016092mg [Erythranthe guttata]                   |
| c52646.graph_c0 | 1.66296213    | 1.16523914    | 1.28218331    | 29.1085545     | 44.7947766     | 39.5325203     | 9.233E-20 | 3.763688  | up        | -                                                                                |
| c52659.graph_c0 | 0.08001494    | 0.08009507    | 0             | 2.58002446     | 3.51414395     | 2.29569025     | 2.71E-09  | 4.707484  | up        | PREDICTED: LOW QUALITY PROTEIN: phototropin-1 [Sesamum indicum]                  |
| c52660.graph_c0 | 0.099898      | 0             | 0             | 10.4917112     | 9.74973319     | 8.51656141     | 3.242E-17 | 7.175683  | up        | PREDICTED: protein RADIALIS-like 5 [Sesamum indicum]                             |
| c52662.graph_c0 | 5.31967927    | 4.56429096    | 4.29691333    | 0              | 0              | 0              | 8.313E-22 | -Inf      | down      | hypothetical protein M569_00609, partial [Genlisea aurea]                        |
| c52666.graph_c0 | 3.21245743    | 4.56418277    | 4.12813499    | 0.47734279     | 0.20227472     | 0.25484205     | 6.064E-16 | -4.674139 | down      | -                                                                                |
| c52667.graph_c0 | 1.04980163    | 1.40113713    | 0.44967888    | 44.1663218     | 60.1083197     | 69.13169       | 8.511E-20 | 4.885881  | up        | PIP2;1 [Karelinia caspia]                                                        |
| c52673.graph_c0 | 1.21000952    | 0.69878144    | 0.47843389    | 14.7488637     | 16.0788371     | 15.2216763     | 9.177E-23 | 3.25869   | up        | PREDICTED: uncharacterized protein LOC105176754 [Sesamum indicum]                |
| c52674.graph_c0 | 2819.40896    | 2596.66673    | 2878.14897    | 29.4232988     | 24.7631648     | 28.0715008     | 0         | -7.671407 | down      | hyponeuric protein PHAVU_00505050100g [Pnaseoius vulgare]l                       |
| c52675.graph_c0 | 98.5272191    | 84.2259575    | 90.8602309    | 6.87649248     | 5.82784797     | 6.11866166     | 8.16E-139 | -4.875793 | down      | PREDICTED: uncharacterized protein LOC102593371 [Solanum tuberosum]              |
| c52676.graph_c0 | 25.7252892    | 24.7461302    | 22.5762054    | 21.0408108     | 12.9821972     | 11.8298269     | 5.558E-12 | -1.677206 | down      | PREDICTED: zinc finger protein NUTCRACKER-like [Sesamum indicum]                 |
| c52679.graph_c0 | 43.5058974    | 55.9921654    | 58.3270085    | 2.08210236     | 1.8993829      | 2.57311411     | 3.89E-54  | -5.610016 | down      | PREDICTED: transcription factor 1GAS-like [Sesamum indicum]                      |
| c52682.graph_c0 | 5.57455068    | 6.07249741    | 8.0062852     | 49.0906735     | 49.4453395     | 49.7286672     | 5.165E-11 | 1.893973  | up        | PREDICTED: uncharacterized protein At2g34160-like [Sesamum indicum]              |
| c52686.graph_c0 | 1.00870062    | 0.72122191    | 0.55552296    | 7.16873761     | 6.60994792     | 6.85119589     | 0.0001174 | 2.163125  | up        | -                                                                                |
| c52687.graph_c0 | 7.90859801    | 8.05788365    | 6.71474781    | 4.35853923     | 2.41204528     | 2.37322809     | 9.508E-12 | -2.313804 | down      | -                                                                                |
| c52690.graph_c0 | 0.08838686    | 0.44237685    | 0.11358062    | 21.2526414     | 38.7320071     | 45.8633299     | 1.421E-14 | 6.336433  | up        | PREDICTED: 21 kDa protein-like [Sesamum indicum]                                 |

| #ID             | 0 h-1<br>FPKM | 0 h-2<br>FPKM | 0 h-3<br>FPKM | 48 h-1<br>FPKM | 48 h-2<br>FPKM | 48 h-3<br>FPKM | FDR       | log2FC    | regulated | nr_annotation                                                                                               |
|-----------------|---------------|---------------|---------------|----------------|----------------|----------------|-----------|-----------|-----------|-------------------------------------------------------------------------------------------------------------|
| c52691.graph_c0 | 20.2010636    | 16.9915023    | 18.387743     | 0.38771953     | 0.13691394     | 0.45998734     | 2.201E-47 | -6.828708 | down      | RNA recognition motif containing protein [Zea mays]                                                         |
| c52692.graph_c0 | 49.4771286    | 46.7136256    | 53.7311771    | 36.4024835     | 33.9928514     | 33.2284017     | 1.719E-21 | -1.549891 | down      | PREDICTED: universal stress protein A-like protein [Sesamum indicum]                                        |
| c52697.graph_c0 | 0             | 0             | 0             | 3.94746639     | 5.47968123     | 6.90374538     | 5.843E-12 | Inf       | up        | MYB-related transcription factor [Salvia miltiorrhiza]                                                      |
| c52700.graph_c0 | 10.0736203    | 6.09223998    | 8.22546936    | 0              | 0              | 0              | 9.424E-31 | -Inf      | down      | PREDICTED: 60S ribosomal protein L18-5 [Neurospora crassa]                                                  |
| c52705.graph_c0 | 0.68748583    | 3.09678407    | 0.8834465     | 19.9507387     | 11.7418825     | 17.1884902     | 8.608E-05 | 2.382881  | up        | PREDICTED: succinate dehydrogenase [ubiquinone] iron-sulfur subunit 2, mitochondrial-like [Sesamum indicum] |
| c52710.graph_c0 | 0.29504194    | 0.59067476    | 0.37914057    | 6.5234851      | 8.63855182     | 9.91611961     | 4.174E-07 | 3.286404  | up        | -                                                                                                           |
| c52711.graph_c0 | 12.9763642    | 14.1091303    | 12.3626051    | 7.42014193     | 11.1360492     | 10.6371962     | 0.0002911 | -1.457912 | down      | PREDICTED: 7-deoxyloganetic acid glucosyltransferase-like [Sesamum indicum]                                 |
| c52712.graph_c0 | 10.8234076    | 11.3670773    | 11.8564324    | 7.19236192     | 7.27309737     | 4.79979029     | 4.73E-06  | -1.837003 | down      | PREDICTED: C-terminal binding protein AN-like isoform X2 [Sesamum indicum]                                  |
| c52717.graph_c0 | 2.20843495    | 3.15806624    | 2.4325083     | 24.9959531     | 28.635545      | 23.0171063     | 1.806E-08 | 2.278901  | up        | PREDICTED: pleiotropic drug resistance protein 1-like [Sesamum indicum]                                     |
| c52718.graph_c0 | 0.70641293    | 0.23570677    | 0             | 34.9259269     | 32.403538      | 25.0931327     | 1.508E-18 | 5.6211    | up        | hypothetical protein M569_04419, partial [Genlisea aurea]                                                   |
| c52719.graph_c0 | 9.83682169    | 8.11685106    | 8.37019677    | 5.14347991     | 6.48677772     | 5.99321577     | 4.198E-05 | -1.59901  | down      | -                                                                                                           |
| c52721.graph_c0 | 0.099898      | 0.09999803    | 0.25674577    | 2.39284642     | 4.38737994     | 4.01261066     | 7.477E-08 | 3.524251  | up        | PREDICTED: transcription repressor OFP17 [Nicotiana tomentosiformis]                                        |
| c52726.graph_c0 | 9.46555246    | 8.79824286    | 6.95063409    | 8.63130182     | 2.73371869     | 1.82105001     | 1.095E-06 | -1.922297 | down      | -                                                                                                           |
| c52732.graph_c0 | 10.5895353    | 9.6783879     | 10.0580664    | 4.24163941     | 4.04415236     | 4.52902229     | 1.088E-05 | -2.259915 | down      | -                                                                                                           |
| c52734.graph_c0 | 5.56920824    | 5.95925289    | 4.68884167    | 0.70768523     | 0.18742667     | 0.78711757     | 2.727E-13 | -4.274769 | down      | -                                                                                                           |
| c52737.graph_c0 | 0.87150579    | 0.87237847    | 1.67987916    | 4.61660585     | 8.50562453     | 6.07244157     | 0.0057959 | 1.453047  | up        | PREDICTED: serine/threonine-protein kinase At5g01020 [Sesamum indicum]                                      |
| c52742.graph_c0 | 0             | 0             | 0             | 10.5919823     | 14.0116162     | 12.7941281     | 1.527E-32 | Inf       | up        | PREDICTED: palmitoyl-protein thioesterase 1-like [Sesamum indicum]                                          |
| c52743.graph_c0 | 8.30412485    | 4.64201204    | 4.85051327    | 0              | 0              | 0              | 9.968E-18 | -Inf      | down      | -                                                                                                           |
| c52746.graph_c0 | 4.23704957    | 2.5447754     | 3.42243091    | 0.89221633     | 0.23629875     | 0.19847218     | 3.131E-12 | -3.930531 | down      | -                                                                                                           |
| c52747.graph_c0 | 25.4571872    | 29.4920563    | 25.6362928    | 11.5667469     | 8.64515382     | 7.29281305     | 1.159E-55 | -2.560436 | down      | hypothetical protein MIMGU_mgv1a022353mg [Erythranthe guttata]                                              |
| c52748.graph_c0 | 45.7607402    | 49.9707956    | 49.6400466    | 10.0375663     | 6.96016434     | 8.68778345     | 3.983E-74 | -3.513272 | down      | PREDICTED: pentatricopeptide repeat-containing protein At3g57430, chloroplastic [Sesamum indicum]           |
| c52749.graph_c0 | 7.20043393    | 4.67522859    | 4.00122926    | 0              | 0              | 0              | 6.829E-17 | -Inf      | down      | -                                                                                                           |
| c52750.graph_c0 | 2.8402154     | 2.18188283    | 1.61269757    | 17.6467811     | 36.4222862     | 31.0249856     | 1.124E-06 | 2.657029  | up        | -                                                                                                           |
| c52753.graph_c0 | 8.49020982    | 11.1488473    | 8.44664962    | 1.51388421     | 1.0691845      | 1.27220923     | 1.788E-22 | -3.875711 | down      | -                                                                                                           |
| c52754.graph_c0 | 0.62824408    | 1.25774634    | 0.40365926    | 8.39230164     | 8.27747935     | 11.3298779     | 1.871E-05 | 2.598929  | up        | hypothetical protein M569_06445, partial [Genlisea aurea]                                                   |

| #ID             | 0 h-1<br>FPKM | 0 h-2<br>FPKM | 0 h-3<br>FPKM | 48 h-1<br>FPKM | 48 h-2<br>FPKM | 48 h-3<br>FPKM | FDR       | log2FC    | regulated | nr_annotation                                                                   |
|-----------------|---------------|---------------|---------------|----------------|----------------|----------------|-----------|-----------|-----------|---------------------------------------------------------------------------------|
| c52758.graph_c0 | 24.5720259    | 24.5055324    | 21.0506841    | 3.10215578     | 2.22051209     | 2.6856774      | 3.14E-54  | -4.141149 | down      | PREDICTED: auxin-induced protein X15-like [Sesamum indicum]                     |
| c52760.graph_c0 | 50.8722032    | 51.144549     | 47.4663339    | 18.7467167     | 25.472446      | 22.1200796     | 8.707E-20 | -2.193426 | down      | hypothetical protein MIMGU_mgv1a001181mg [Erythranthe guttata]                  |
| c52761.graph_c0 | 1.29663561    | 0.353982      | 0             | 30.2980125     | 30.601508      | 33.3363847     | 3.56E-28  | 4.836162  | up        | PREDICTED: callose synthase 3-like [Cucumis sativus]                            |
| c52765.graph_c0 | 0             | 0             | 0             | 6.5503719      | 9.67299815     | 8.65441197     | 4.899E-12 | Inf       | up        | PREDICTED: transcription factor HEC2-like [Sesamum indicum]                     |
| c52769.graph_c0 | 0.86678195    | 1.12794487    | 1.67077368    | 26.0322758     | 37.0527035     | 42.8451152     | 5.554E-19 | 3.821847  | up        | PREDICTED: uncharacterized protein LOC105168965 [Sesamum indicum]               |
| c52771.graph_c0 | 0.17157045    | 0.17174225    | 0.11023741    | 10.2740226     | 9.46077823     | 7.87598089     | 3.976E-15 | 4.917906  | up        | PREDICTED: CASP-like protein 2C1 isoform X2 [Sesamum indicum]                   |
| c52778.graph_c0 | 0.17018039    | 0.5110524     | 0             | 10.3475642     | 23.5848867     | 10.1837217     | 3.166E-05 | 5.00326   | up        | PREDICTED: uncharacterized protein LOC104588233 isoform X2 [Nelumbo nucifera]   |
| c52779.graph_c0 | 4.50510001    | 5.26121306    | 5.54801389    | 0              | 0              | 0              | 2.023E-20 | -Inf      | down      | -                                                                               |
| c52787.graph_c0 | 3.51001911    | 4.99291654    | 4.74790897    | 0              | 0              | 0.15143631     | 3.707E-18 | -7.493875 | down      | -                                                                               |
| c52791.graph_c0 | 96.25799      | 99.4209325    | 98.4175559    | 3.41644923     | 4.56348249     | 2.24690921     | 3.34E-160 | -5.864642 | down      | hypothetical protein MIMGU_mgv1a018283mg [Erythranthe guttata]                  |
| c52793.graph_c0 | 26.1962352    | 31.9392131    | 29.3555862    | 24.5911911     | 29.0806159     | 26.1555402     | 6.268E-08 | -1.152508 | down      | hypothetical protein P1A V U 0020225 / 00g [Pnaseous vulgaris]                  |
| c52795.graph_c0 | 27.315216     | 27.4519383    | 25.8344346    | 11.0724058     | 13.3293992     | 12.718243      | 1.26E-20  | -2.138561 | down      | PREDICTED: protein ELF4-LIKE 3 [Sesamum indicum]                                |
| c52799.graph_c0 | 28.4638294    | 29.7728858    | 26.0971784    | 3.38833108     | 4.52592399     | 2.75274996     | 4.372E-37 | -4.001609 | down      | PREDICTED: uncharacterized protein LOC105178281 [Sesamum indicum]               |
| c52801.graph_c0 | 85.7546789    | 77.8276281    | 75.5081715    | 47.6998059     | 43.1351831     | 45.3749183     | 2.001E-34 | -1.826552 | down      | PREDICTED: UPF0369 protein C6orf57 homolog [Nicotiana tomentosiformis]          |
| c52802.graph_c0 | 0             | 0             | 0             | 1.74264525     | 4.0808998      | 2.77474943     | 6.861E-07 | Inf       | up        | PREDICTED: adenine phosphoribosyltransferase 3 [Nicotiana tomentosiformis]      |
| c52803.graph_c0 | 203.439453    | 244.526075    | 194.231766    | 244.520402     | 82.6219584     | 75.3518349     | 8.445E-06 | -1.666606 | down      | PREDICTED: probable CCR4-associated factor 1 homolog 11 [Sesamum indicum]       |
| c52805.graph_c0 | 10.4744979    | 11.1140857    | 9.82590545    | 4.43890369     | 6.84926466     | 10.6470438     | 4.363E-06 | -1.545146 | down      | PREDICTED: dnaJ protein ERDJ3A [Sesamum indicum]                                |
| c52810.graph_c0 | 1.05815532    | 0.17653582    | 1.81302864    | 5.84905018     | 6.19635943     | 4.91531359     | 0.0047289 | 1.448101  | up        | PREDICTED: UDP-galactose transporter 2-like [Nelumbo nucifera]                  |
| c52812.graph_c0 | 4.41925774    | 3.96606058    | 5.87474603    | 3.50974869     | 3.12324865     | 0.99934505     | 8.478E-05 | -1.913513 | down      | PREDICTED: peamaclein [Vitis vinifera]                                          |
| c52817.graph_c0 | 1.05714778    | 2.11641271    | 0.67923838    | 40.4174097     | 41.7856015     | 40.2960799     | 1.183E-15 | 3.979373  | up        | -                                                                               |
| c52825.graph_c0 | 0             | 0             | 0             | 4.41102625     | 6.11077742     | 11.7747139     | 1.113E-05 | Inf       | up        | hypothetical protein MIMGU_mgv1a016882mg [Erythranthe guttata]                  |
| c52828.graph_c0 | 0             | 0             | 0             | 15.8966347     | 13.7630947     | 13.2831221     | 6.945E-27 | Inf       | up        | cytochrome c oxidase subunit 3 (mitochondrion) [Microbotryum lychnidis-dioicae] |
| c52831.graph_c0 | 0             | 0             | 0             | 6.93369479     | 9.63064719     | 10.0083972     | 1.488E-13 | Inf       | up        | -                                                                               |

| #ID             | 0 h-1<br>FPKM | 0 h-2<br>FPKM | 0 h-3<br>FPKM | 48 h-1<br>FPKM | 48 h-2<br>FPKM | 48 h-3<br>FPKM | FDR       | log2FC    | regulated | nr_annotation                                                                              |
|-----------------|---------------|---------------|---------------|----------------|----------------|----------------|-----------|-----------|-----------|--------------------------------------------------------------------------------------------|
| c52832.graph_c0 | 68.4917306    | 67.576749     | 56.2996251    | 20.6602795     | 21.7178311     | 25.1113351     | 1.493E-63 | -2.528609 | down      | PREDICTED: acidic leucine-rich nuclear phosphoprotein 32-related protein [Sesamum indicum] |
| c52837.graph_c0 | 0.08503434    | 0             | 0             | 7.44222171     | 7.80114063     | 8.22527586     | 9.223E-17 | 7.111055  | up        | hypothetical protein CISIN_1g041913mg [Citrus sinensis]                                    |
| c52838.graph_c0 | 1.62089096    | 1.62251403    | 1.92268528    | 8.84475588     | 10.8301978     | 12.3671595     | 0.0004646 | 1.608768  | up        | -                                                                                          |
| c52840.graph_c0 | 6.19315683    | 5.36160722    | 5.05469231    | 4.08640029     | 5.14584666     | 5.28256961     | 0.0013176 | -1.214702 | down      | hypothetical protein MIMGU_mgv1a013481mg [Erythranthe guttata]                             |
| c52841.graph_c0 | 2.50562466    | 1.32373721    | 1.60991345    | 23.9811383     | 33.0130551     | 32.5208969     | 1.812E-26 | 3.020347  | up        | PREDICTED: probable calcium-binding protein CML49 [Sesamum indicum]                        |
| c52842.graph_c0 | 0             | 0             | 0             | 5.85073655     | 13.3387        | 32.8492413     | 1.55E-05  | Inf       | up        | PREDICTED: endoglucanase 1-like [Sesamum indicum]                                          |
| c52849.graph_c0 | 8.79298705    | 4.28805246    | 6.08425811    | 0              | 0              | 0              | 5.335E-14 | -Inf      | down      | unknown [Picea sitchensis]                                                                 |
| c52850.graph_c0 | 0             | 0.06641872    | 0             | 61.922711      | 97.2013872     | 93.3355876     | 2.296E-53 | 10.87866  | up        | PREDICTED: aquaporin TIP4-1 [Sesamum indicum]                                              |
| c52852.graph_c0 | 1.10882214    | 1.87540311    | 1.32661274    | 0.10567441     | 0              | 0              | 2.357E-18 | -6.310202 | down      | PREDICTED: uncharacterized protein LOC103504028 [Cucumis melo]                             |
| c52853.graph_c0 | 1.60929005    | 1.8410303     | 0.88628633    | 30.4988495     | 21.9886363     | 16.7726019     | 3.874E-06 | 2.994954  | up        | -                                                                                          |
| c52856.graph_c0 | 3.62546949    | 4.42296544    | 2.6206154     | 29.3295415     | 30.739373      | 29.9979062     | 1.678E-10 | 2.063396  | up        | PREDICTED: protein transport protein SEC31 homolog B [Sesamum indicum]                     |
| c52857.graph_c0 | 0             | 0             | 0             | 2.61956562     | 1.85007476     | 1.8129018      | 6.063E-10 | Inf       | up        | PREDICTED: basic leucine zipper 43 [Sesamum indicum]                                       |
| c52858.graph_c0 | 0.46345301    | 1.62370983    | 2.97777736    | 17.7189706     | 13.3433126     | 10.8274133     | 0.0001869 | 2.024475  | up        | PREDICTED: membrin-11 [Sesamum indicum]                                                    |
| c52861.graph_c0 | 119.662825    | 122.156934    | 119.786297    | 2.62218909     | 4.62981898     | 2.52764209     | 3.22E-221 | -6.232799 | down      | PREDICTED: neat snock 70 kDa protein-like [Sesamum indicum]                                |
| c52868.graph_c0 | 40.0305047    | 40.8296532    | 42.3629981    | 41.4747627     | 37.7052151     | 34.3521225     | 5.394E-15 | -1.133514 | down      | hypothetical protein MIMGU_mgv1a007230mg [Erythranthe guttata]                             |
| c52869.graph_c0 | 143.492551    | 139.341466    | 131.097117    | 43.918504      | 49.0852778     | 44.3540076     | 3.268E-52 | -2.609389 | down      | -                                                                                          |
| c52870.graph_c0 | 4.53542719    | 3.92088209    | 4.90098932    | 3.03878644     | 2.91742335     | 2.53490053     | 0.0002118 | -1.67057  | down      | hypothetical protein M569_00403, partial [Genlisea aurea]                                  |
| c52871.graph_c0 | 0.4355304     | 0             | 0             | 7.75728763     | 4.81739295     | 5.11728757     | 2.437E-07 | 4.357319  | up        | PREDICTED: uncharacterized protein LOC105159124 [Sesamum indicum]                          |
| c52872.graph_c0 | 79.3171032    | 94.7481216    | 82.9877765    | 40.7305148     | 39.6409895     | 33.9827952     | 7.632E-43 | -2.184033 | down      | -                                                                                          |
| c52876.graph_c0 | 1.84647139    | 0.69312013    | 1.48299303    | 30.1943454     | 24.7788539     | 24.2179128     | 7.049E-11 | 3.285494  | up        | PREDICTED: muscle M-line assembly protein unc-89-like [Populus euphratica]                 |
| c52879.graph_c0 | 0.07585005    | 0.075926      | 0             | 3.84329059     | 6.07023689     | 5.9068182      | 3.932E-13 | 5.694794  | up        | -                                                                                          |
| c52880.graph_c0 | 3.23132494    | 3.00352058    | 1.48299303    | 58.687601      | 77.9407585     | 100.844902     | 3.769E-15 | 3.926132  | up        | hypothetical protein MIMGU_mgv1a011350mg [Erythranthe guttata]                             |
| c52882.graph_c0 | 9.96088246    | 10.4043723    | 10.5740191    | 10.3735644     | 7.60813863     | 7.10025784     | 0.00752   | -1.313813 | down      | -                                                                                          |
| c52884.graph_c0 | 1.26417293    | 1.01235105    | 0.64980491    | 5.82319282     | 9.37682937     | 5.38869963     | 0.0018022 | 1.797624  | up        | -                                                                                          |
| c52890.graph_c0 | 6.41122314    | 3.14333535    | 4.37154214    | 0              | 0              | 0              | 7.278E-15 | -Inf      | down      | 60S ribosomal protein L11 [Zea mays]                                                       |

| #ID             | 0 h-1<br>FPKM | 0 h-2<br>FPKM | 0 h-3<br>FPKM | 48 h-1<br>FPKM | 48 h-2<br>FPKM | 48 h-3<br>FPKM | FDR       | log2FC    | regulated | nr_annotation                                                                                                  |
|-----------------|---------------|---------------|---------------|----------------|----------------|----------------|-----------|-----------|-----------|----------------------------------------------------------------------------------------------------------------|
| c52891.graph_c0 | 0             | 0             | 0             | 5.08790044     | 9.81752472     | 9.70110688     | 1.977E-10 | Inf       | up        | PREDICTED: anthocyanidin 3-O-glucosyltransferase 2-like [Sesamum indicum]                                      |
| c52898.graph_c0 | 0.40444411    | 0.50606138    | 0.5197267     | 20.2135661     | 22.8940404     | 16.5768752     | 1.324E-20 | 4.363656  | up        | PREDICTED: vegetative incompatibility protein HET-E-1-like [Sesamum indicum]                                   |
| c52903.graph_c0 | 1.4682682     | 1.11700122    | 1.43395491    | 0.64927893     | 1.14638716     | 0.91473044     | 0.0015333 | -1.595277 | down      | -                                                                                                              |
| c52907.graph_c0 | 0.44285432    | 0.55412222    | 0.426814      | 40.2886457     | 71.6391388     | 68.8837553     | 5.562E-22 | 5.962701  | up        | -                                                                                                              |
| c52908.graph_c0 | 43.1549937    | 46.3629107    | 45.2991217    | 8.95629117     | 10.4137732     | 9.71860247     | 1.133E-71 | -3.232494 | down      | PREDICTED: transcription factor TCF9 [Sesamum indicum]                                                         |
| c52909.graph_c0 | 0             | 0             | 0             | 6.26594573     | 4.97850729     | 5.31405392     | 1.953E-13 | Inf       | up        | PREDICTED: glucan endo-1,3-beta-glucosidase 4-like isoform X1 [Sesamum indicum]                                |
| c52911.graph_c0 | 20.7480141    | 23.906521     | 18.6058698    | 18.5643685     | 19.5210182     | 19.3327202     | 1.54E-05  | -1.156411 | down      | -                                                                                                              |
| c52916.graph_c0 | 0             | 0             | 0             | 2.85794942     | 2.90654483     | 2.59384593     | 1.177E-12 | Inf       | up        | PREDICTED: pectinesterase/pectinesterase inhibitor PPE8B-like [Sesamum indicum]                                |
| c52917.graph_c0 | 0.52372489    | 1.04849865    | 0.26920289    | 5.21088694     | 4.29356889     | 7.12665031     | 0.0001023 | 2.164693  | up        | PREDICTED: scarecrow-like protein 8 [Sesamum indicum]                                                          |
| c52919.graph_c0 | 0             | 0.21253361    | 0.2728409     | 7.23734649     | 7.45987235     | 9.92069191     | 9.134E-10 | 4.630921  | up        | V-type proton ATPase subunit [Morus notabilis]                                                                 |
| c52924.graph_c0 | 5.7802941     | 5.40034338    | 4.20914717    | 5.14767781     | 3.00873956     | 1.26355111     | 0.0002902 | -1.705103 | down      | PREDICTED: probable galacturonosyltransferase-like 1 [Sesamum indicum]                                         |
| c52926.graph_c0 | 3.92877393    | 3.07777148    | 3.51209046    | 16.3661761     | 17.7547574     | 24.5742611     | 3.744E-06 | 1.45915   | up        | -                                                                                                              |
| c52927.graph_c0 | 1.03620904    | 0.86437221    | 0.44385655    | 19.251571      | 29.3279231     | 37.6575368     | 9.278E-11 | 4.181953  | up        | unknown [Lotus japonicus]                                                                                      |
| c52930.graph_c0 | 2.16052922    | 1.73015413    | 3.88691182    | 23.8054284     | 27.327574      | 31.5249416     | 5.385E-16 | 2.380773  | up        | PREDICTED: uncharacterized protein LOC105172794 [Sesamum indicum]                                              |
| c52932.graph_c0 | 34.0637966    | 22.0360619    | 20.5466638    | 0              | 0              | 0              | 5.786E-28 | -Inf      | down      | -                                                                                                              |
| c52935.graph_c0 | 0             | 0.04486597    | 0.17279063    | 6.97836719     | 6.99903798     | 8.74447089     | 3.739E-23 | 5.663183  | up        | PREDICTED: GDSL esterase/lipase At4g10955-like [Sesamum indicum]                                               |
| c52939.graph_c0 | 7.01848112    | 14.0510181    | 9.01902611    | 4.38756318     | 6.6051822      | 5.54782832     | 0.0005746 | -1.886406 | down      | -                                                                                                              |
| c52942.graph_c0 | 0             | 0             | 0             | 3.18835316     | 9.45748598     | 8.83515841     | 1.495E-07 | Inf       | up        | -                                                                                                              |
| c52943.graph_c0 | 46.0578735    | 46.9473593    | 46.1941003    | 1.55237258     | 0.54818351     | 0.69064589     | 2.427E-57 | -6.637873 | down      | -                                                                                                              |
| c52952.graph_c0 | 6.42665612    | 7.07640059    | 4.78993438    | 32.6820145     | 41.2711802     | 35.8235086     | 1.192E-07 | 1.567744  | up        | unnamed protein product [Coffea canephora]                                                                     |
| c52953.graph_c0 | 0             | 0             | 0             | 37.2311719     | 44.4924009     | 37.1680818     | 1.713E-26 | Inf       | up        | -                                                                                                              |
| c52958.graph_c0 | 3.47695978    | 1.28226789    | 1.64611667    | 9.77819598     | 12.3234154     | 10.65071       | 0.0090617 | 1.338891  | up        | PREDICTED: phosphatidylinositol/phosphatidylcholine transfer protein SFH6-like isoform X2 [Populus euphratica] |
| c52961.graph_c0 | 0.30799728    | 0.15415285    | 0.19789435    | 2.97934545     | 5.41072327     | 6.31191349     | 4.177E-06 | 3.451552  | up        | -                                                                                                              |
| c52974.graph_c0 | 0             | 0             | 0             | 308.0893       | 425.807347     | 545.662377     | 1.782E-45 | Inf       | up        | -                                                                                                              |
| c52984.graph_c0 | 15.6017172    | 16.9514845    | 19.4443371    | 1.30009925     | 1.30078098     | 0.83548147     | 4.106E-57 | -4.935886 | down      | -                                                                                                              |
| c52985.graph_c0 | 8.9894115     | 6.9987657     | 9.71813862    | 6.17836054     | 8.91264521     | 7.95378357     | 0.00339   | -1.182877 | down      | -                                                                                                              |
| c52986.graph_c0 | 0.06494756    | 0.19503778    | 0.16692037    | 2.87202852     | 3.23272634     | 5.21750715     | 1.496E-07 | 3.70146   | up        | PREDICTED: thioredoxin H2 [Sesamum indicum]                                                                    |

| #ID             | 0 h-1<br>FPKM | 0 h-2<br>FPKM | 0 h-3<br>FPKM | 48 h-1<br>FPKM | 48 h-2<br>FPKM | 48 h-3<br>FPKM | FDR       | log2FC    | regulated | nr_annotation                                                                   |
|-----------------|---------------|---------------|---------------|----------------|----------------|----------------|-----------|-----------|-----------|---------------------------------------------------------------------------------|
| c52991.graph_c0 | 17.3519715    | 14.9247722    | 13.5439524    | 4.49969765     | 2.75977497     | 2.84480804     | 1.069E-19 | -3.186542 | down      | hypothetical protein M569_07000 [Genlisea aurea]                                |
| c52992.graph_c0 | 6.13009916    | 6.68411587    | 8.29942476    | 1.51270907     | 1.17519001     | 1.34599943     | 8.945E-14 | -3.404524 | down      | -                                                                               |
| c53000.graph_c0 | 7.86357134    | 8.01370055    | 8.94840406    | 1.04738817     | 1.29451089     | 1.009623       | 3.357E-35 | -3.910036 | down      | -                                                                               |
| c53001.graph_c0 | 1.25343881    | 1.25469393    | 1.38061585    | 6.76353327     | 11.8836524     | 14.5316335     | 0.0001968 | 2.06352   | up        | hypothetical protein MIMGU_mgv1a027115mg, partial [Erythranthe guttata]         |
| c53003.graph_c0 | 24.2430563    | 29.8225044    | 20.2684037    | 12.1089495     | 16.8188858     | 14.6053933     | 5.209E-07 | -1.791811 | down      | -                                                                               |
| c53007.graph_c0 | 20.8453868    | 30.102146     | 21.078411     | 147.651425     | 99.7211422     | 122.695428     | 6.56E-05  | 1.351261  | up        | -                                                                               |
| c53009.graph_c0 | 0             | 0             | 0             | 4.59871156     | 6.33331046     | 6.54704943     | 1.09E-11  | Inf       | up        | -                                                                               |
| c53010.graph_c0 | 4.12118102    | 3.00022382    | 1.44433112    | 17.6028853     | 25.5954623     | 20.883922      | 0.0005049 | 1.889055  | up        | -                                                                               |
| c53014.graph_c0 | 0.45799077    | 0.68767407    | 0.29426814    | 12.2359982     | 18.1028805     | 24.4030567     | 5.918E-09 | 4.227811  | up        | unknown [Picea sitchensis]                                                      |
| c53027.graph_c0 | 1.80885321    | 2.80652997    | 2.44067038    | 0.99986013     | 0.26480764     | 0.07413913     | 3.803E-10 | -3.381765 | down      | -                                                                               |
| c53031.graph_c0 | 11.73195      | 13.0815874    | 15.2668559    | 3.42032834     | 4.63798161     | 8.03454323     | 7.968E-10 | -2.345737 | down      | -                                                                               |
| c53033.graph_c0 | 3.85342293    | 3.10885379    | 1.84768695    | 22.5188124     | 23.8559512     | 23.9973785     | 5.302E-14 | 1.985727  | up        | PREDICTED: pleiotropic drug resistance protein 1-like [Sesamum indicum]         |
| c53036.graph_c0 | 11.6687294    | 7.32680506    | 6.40686022    | 0              | 0              | 0              | 5.047E-21 | -Inf      | down      | hypothetical protein GUITHDRAFT_93413, partial [Guillardia theta CCMP2712]      |
| c53038.graph_c0 | 1.89370724    | 1.08067115    | 1.2736016     | 0              | 0              | 0              | 6.538E-24 | -Inf      | down      | predicted protein [Physcomitrella patens]                                       |
| c53043.graph_c0 | 2.51894925    | 1.14612345    | 2.64841324    | 13.2908256     | 9.16318643     | 12.3892442     | 0.0040876 | 1.448488  | up        | hypothetical protein M569_02184 [Genlisea aurea]                                |
| c53045.graph_c0 | 12.2530294    | 12.0883956    | 9.46251678    | 3.41904935     | 2.9896436      | 1.01408318     | 2.032E-30 | -3.192389 | down      | PREDICTED: uncharacterized protein At1g76070 [Sesamum indicum]                  |
| c53052.graph_c0 | 0             | 0             | 0             | 24.1026125     | 36.5754365     | 37.5311294     | 3.599E-38 | Inf       | up        | unnamed protein product [Coffea canephora]                                      |
| c53054.graph_c0 | 2.07580077    | 3.56207892    | 4.19176399    | 63.1079812     | 66.8552538     | 52.9929709     | 1.655E-15 | 3.196084  | up        | PREDICTED: LOW QUALITY PROTEIN: 36.4 kDa proline-rich protein [Sesamum indicum] |
| c53056.graph_c0 | 0.62487656    | 1.25100456    | 0.80299112    | 6.90812456     | 7.62325033     | 9.22021153     | 0.0001896 | 2.128132  | up        | putative S-adenosine-L-methionine synthetase [Linnam violaceal]                 |
| c53061.graph_c0 | 0             | 0             | 0             | 2.77300051     | 6.21427611     | 11.2930962     | 6.667E-05 | Inf       | up        | PREDICTED: dirigent protein 21-like [Sesamum indicum]                           |
| c53074.graph_c0 | 5.47554551    | 7.30803792    | 7.03629277    | 6.96611716     | 4.07158976     | 2.56485896     | 0.0014974 | -1.547099 | down      | PREDICTED: probable galacturonosyltransferase-like 1 [Sesamum indicum]          |
| c53076.graph_c0 | 7.84791442    | 8.10918495    | 8.29562771    | 0.4664523      | 0.24707483     | 0.10376161     | 2.552E-25 | -5.889477 | down      | -                                                                               |
| c53082.graph_c0 | 0.91345156    | 2.40021138    | 1.61400445    | 21.9850014     | 26.1878189     | 35.6610933     | 2.903E-12 | 3.064435  | up        | hypothetical protein SORBIDRAFT_07g000600 [Sorghum bicolor]                     |
| c53092.graph_c0 | 6.059923      | 6.86414782    | 6.35274922    | 4.55438648     | 2.80150852     | 3.5295669      | 6.235E-05 | -1.834095 | down      | -                                                                               |
| c53100.graph_c0 | 0.36775843    | 0             | 0             | 9.03474814     | 6.46057359     | 8.5415061      | 7.251E-12 | 5.03845   | up        | hypothetical protein MIMGU_mgv1a006779mg [Erythranthe guttata]                  |
| c53101.graph_c0 | 0             | 0             | 0             | 9.60297367     | 14.2781561     | 16.6396171     | 5.364E-22 | Inf       | up        | -                                                                               |
| c53102.graph_c0 | 0.29062867    | 1.45459844    | 0.74693869    | 12.3163199     | 6.52382377     | 12.3884206     | 0.0001373 | 2.635826  | up        | -                                                                               |

| #ID             | 0 h-1<br>FPKM | 0 h-2<br>FPKM | 0 h-3<br>FPKM | 48 h-1<br>FPKM | 48 h-2<br>FPKM | 48 h-3<br>FPKM | FDR       | log2FC    | regulated | nr_annotation                                                                  |
|-----------------|---------------|---------------|---------------|----------------|----------------|----------------|-----------|-----------|-----------|--------------------------------------------------------------------------------|
| c53107.graph_c0 | 57.2474771    | 57.6249403    | 58.9755134    | 25.3388237     | 23.2538853     | 21.1044163     | 1.325E-32 | -2.333912 | down      | PREDICTED: R3H domain-containing protein 1-like, partial [Sesamum indicum]     |
| c53108.graph_c0 | 39.3821837    | 38.7074593    | 42.5397766    | 0.52581792     | 2.2281613      | 1.98844589     | 1.308E-82 | -5.707005 | down      | -                                                                              |
| c53115.graph_c0 | 1.6316135     | 2.17766308    | 1.16482663    | 10.8560745     | 12.7392309     | 11.1457728     | 0.0005844 | 1.788994  | up        | -                                                                              |
| c53119.graph_c0 | 33.9437957    | 51.7161879    | 37.2045447    | 7.58787407     | 7.55125478     | 5.72866825     | 4.005E-17 | -3.572183 | down      | -                                                                              |
| c53120.graph_c0 | 0.29504194    | 0             | 0             | 14.4060296     | 16.1252967     | 15.962534      | 3.22E-12  | 6.301797  | up        | -                                                                              |
| c53137.graph_c0 | 0.89951367    | 0.90041439    | 0             | 16.1594679     | 14.9242536     | 28.0198308     | 2.791E-06 | 4.032363  | up        | -                                                                              |
| c53138.graph_c0 | 1.16135656    | 0.98367033    | 1.49238916    | 5.76109375     | 5.49286224     | 7.61604863     | 0.003706  | 1.352352  | up        | unnamed protein product [Coffea canephora]                                     |
| c53141.graph_c0 | 0.0937898     | 0.09388372    | 0             | 2.33294262     | 3.2952931      | 2.69090152     | 6.965E-09 | 4.464162  | up        | PREDICTED: squamosa promoter-binding-like protein 9 [Sesamum indicum]          |
| c53164.graph_c0 | 23.5806769    | 24.3419234    | 20.6433079    | 3.12283328     | 4.02745085     | 3.26192667     | 2.308E-30 | -3.738443 | down      | PREDICTED: uncharacterized protein LOC103930947 [Pyrus x bretschneideri]       |
| c53168.graph_c0 | 2.12647036    | 0.38701813    | 0.74525416    | 11.7542592     | 13.3955617     | 11.8850785     | 5.981E-06 | 2.495158  | up        | hypothetical protein M569_03938, partial [Genlisea aurea]                      |
| c53169.graph_c0 | 1.16791868    | 1.16908818    | 0.30016435    | 9.0380881      | 8.20693579     | 7.85055939     | 0.0001618 | 2.246051  | up        | -                                                                              |
| c53171.graph_c0 | 2.59364375    | 1.46454615    | 1.965577      | 21.3211016     | 25.1184372     | 23.1690801     | 1.348E-17 | 2.511826  | up        | PREDICTED: uncharacterized protein LOC105166615 isoform X1 [Sesamum indicum]   |
| c53173.graph_c0 | 1.24885611    | 0.81256932    | 0.64193182    | 28.7631927     | 33.0916308     | 38.8506535     | 1.241E-47 | 4.203488  | up        | PREDICTED: 30S ribosomal protein 2, chloroplastic [Sesamum indicum]            |
| c53178.graph_c0 | 15.4743775    | 15.4898727    | 11.2255092    | 6.89806734     | 8.52561023     | 8.18381179     | 6.566E-06 | -1.855432 | down      | PREDICTED: uncharacterized protein LOC105161374 [Sesamum indicum]              |
| c53184.graph_c0 | 0             | 0             | 0.14672768    | 2.84016765     | 3.56600087     | 2.99515744     | 7.245E-10 | 4.948723  | up        | PREDICTED: MATE efflux family protein LAL5-like [Sesamum indicum]              |
| c53185.graph_c0 | 6.03893014    | 4.21316594    | 5.87898812    | 81.9345387     | 100.016125     | 106.95713      | 3.961E-34 | 3.140079  | up        | PREDICTED: 60S ribosomal protein L38 [Sesamum indicum]                         |
| c53194.graph_c0 | 33.6240074    | 33.975202     | 22.4193391    | 27.7620729     | 26.1599102     | 28.9929642     | 9.605E-06 | -1.131541 | down      | hypothetical protein M569_16135, partial [Genlisea aurea]                      |
| c53202.graph_c0 | 0.37891494    | 0.25286291    | 0.3246138     | 2.21084735     | 2.34212469     | 3.83086058     | 0.0001295 | 2.109795  | up        | PREDICTED: glutathione S-transferase U17-like [Sesamum indicum]                |
| c53215.graph_c0 | 1.81856002    | 0.72815241    | 2.10322946    | 34.5127477     | 28.9301827     | 23.7027594     | 3.842E-13 | 3.211116  | up        | -                                                                              |
| c53217.graph_c0 | 16.6896165    | 10.8591136    | 7.5063863     | 10.5066349     | 10.5875542     | 7.29657802     | 0.0097951 | -1.312416 | down      | -                                                                              |
| c53219.graph_c0 | 0             | 0             | 0             | 14.0817264     | 7.72533156     | 9.17362955     | 3.447E-08 | Inf       | up        | PREDICTED: CBL-interacting serine/threonine-protein kinase 5 [Sesamum indicum] |
| c53222.graph_c0 | 0.59373033    | 0.19810829    | 0.76296698    | 24.4319121     | 22.4058747     | 26.4441572     | 9.2E-16   | 4.535045  | up        | PREDICTED: zeatin O-glucosyltransferase-like [Solanum lycopersicum]            |
| c53226.graph_c0 | 2.54984714    | 1.1911202     | 1.26697308    | 0              | 0              | 0              | 2.006E-11 | -Inf      | down      | carboxypeptidase, partial [Metarhizium majus ARSEF 297]                        |
| c53235.graph_c0 | 0.24111558    | 0.36203553    | 0.9295292     | 18.8811689     | 22.2378611     | 17.2944785     | 8.446E-18 | 4.219637  | up        | PREDICTED: elicitor-responsive protein 3-like [Sesamum indicum]                |
| c53238.graph_c0 | 1.99943352    | 1.50107674    | 1.28467562    | 16.5780771     | 12.6840007     | 10.653553      | 0.000402  | 2.053431  | up        | -                                                                              |



| #ID             | 0 h-1<br>FPKM | 0 h-2<br>FPKM | 0 h-3<br>FPKM | 48 h-1<br>FPKM | 48 h-2<br>FPKM | 48 h-3<br>FPKM | FDR       | log2FC    | regulated | nr_annotation                                                                                              |
|-----------------|---------------|---------------|---------------|----------------|----------------|----------------|-----------|-----------|-----------|------------------------------------------------------------------------------------------------------------|
| c53256.graph_c0 | 0             | 0             | 0             | 11.8140672     | 20.1143117     | 18.5838663     | 7.086E-16 | Inf       | up        | hypothetical protein MIMGU_mgv1a010045mg<br>[Erythranthe guttata]                                          |
| c53264.graph_c0 | 1.09180025    | 1.63934028    | 0.70150327    | 14.5846452     | 7.19255007     | 8.94988248     | 0.0043724 | 2.16292   | up        | PREDICTED: coatomer subunit beta&apos;-2-like [Glycine<br>max]                                             |
| c53267.graph_c0 | 0             | 0.15790331    | 0             | 17.7296877     | 16.7810452     | 19.0085091     | 2.721E-19 | 7.399216  | up        | hypothetical protein JCGZ_13755 [Jatropha curcas]                                                          |
| c53270.graph_c0 | 49.0072083    | 46.0440538    | 43.6414038    | 9.50497616     | 7.97158435     | 8.80986524     | 1.071E-19 | -3.413244 | down      | Histone H3.3 [Triticum urartu]                                                                             |
| c53273.graph_c0 | 0.25877816    | 0.51807457    | 0.66508035    | 2.74163813     | 2.65187376     | 2.33342821     | 0.0071244 | 1.398985  | up        | -                                                                                                          |
| c53274.graph_c0 | 0.89951367    | 1.80082879    | 2.31182135    | 30.2472092     | 24.5811236     | 26.9137848     | 1.448E-07 | 3.006398  | up        | PREDICTED: 8-hydroxygeraniol dehydrogenase-like<br>[Sesamum indicum]                                       |
| c53277.graph_c0 | 3.22802712    | 5.1700152     | 2.07407133    | 16.0588933     | 24.2584938     | 20.3752077     | 0.003458  | 1.516951  | up        | prohibitin-like protein [Petunia x hybrida]                                                                |
| c53281.graph_c0 | 31.4517278    | 24.711691     | 32.6269016    | 27.8422676     | 28.1236224     | 24.9899336     | 4.004E-08 | -1.1513   | down      | -                                                                                                          |
| c53282.graph_c0 | 5.13623505    | 5.76457558    | 6.00024127    | 2.43761184     | 5.16470833     | 6.12415724     | 0.0047864 | -1.332062 | down      | -                                                                                                          |
| c53293.graph_c0 | 5.21768387    | 3.13374515    | 2.23497678    | 32.6867208     | 32.930185      | 31.6507224     | 7.946E-06 | 2.189458  | up        | -                                                                                                          |
| c53299.graph_c0 | 1.38647313    | 1.15655123    | 1.33625465    | 29.0587906     | 29.7693992     | 33.1491502     | 2.796E-21 | 3.548433  | up        | PREDICTED: probable polygalacturonase [Sesamum<br>indicum]                                                 |
| c53303.graph_c0 | 13.0587973    | 5.58277938    | 10.6629725    | 0              | 0              | 0              | 5.804E-15 | -Inf      | down      | hypothetical protein CICLE_v10052980mg [Citrus<br>sinensis]                                                |
| c53304.graph_c0 | 16.9487067    | 16.7771708    | 17.4238074    | 16.4817127     | 18.9307236     | 12.6584944     | 0.0008326 | -1.107246 | down      | PREDICTED: vacuolar-sorbing receptor 5-like [Sesamum<br>indicum]                                           |
| c53313.graph_c0 | 10.3982339    | 12.9651557    | 11.4867538    | 0.67224781     | 2.49257763     | 1.64494566     | 1.578E-16 | -3.892745 | down      | PREDICTED: uncharacterized protein LOC100815796<br>[Glycine max]                                           |
| c53316.graph_c0 | 3.49294296    | 2.76801549    | 3.55345125    | 1.34080287     | 0.85225084     | 2.62468433     | 8.704E-05 | -2.047686 | down      | -                                                                                                          |
| c53319.graph_c0 | 3.57671215    | 2.68522027    | 0.38301806    | 19.2214197     | 27.9260756     | 27.609296      | 2.612E-06 | 2.482037  | up        | PREDICTED: succinyl-CoA ligase [ADP-forming] subunit<br>beta, mitochondrial [Prunus mume]                  |
| c53339.graph_c0 | 0             | 0             | 0             | 8.43032372     | 6.3792184      | 7.50125135     | 1.108E-11 | Inf       | up        | hypothetical protein MIMGU_mgv1a021216mg, partial<br>[Erythranthe guttata]                                 |
| c53342.graph_c0 | 45.9986597    | 38.7001638    | 42.7913599    | 10.9192181     | 12.1184251     | 17.1184105     | 1.926E-18 | -2.688597 | down      | hypothetical protein MIMGU_mgv1a006294mg<br>[Erythranthe guttata]                                          |
| c53351.graph_c0 | 87.9821338    | 90.7781042    | 81.4433066    | 54.1157034     | 68.8954083     | 63.5688599     | 4.859E-22 | -1.500262 | down      | PREDICTED: zinc finger A20 and AN1 domain-containing<br>stress-associated protein 8-like [Sesamum indicum] |
| c53354.graph_c0 | 0             | 0             | 0             | 4.39544527     | 8.22637961     | 7.43097747     | 8.498E-12 | Inf       | up        | PREDICTED: uncharacterized protein DDB_G0271670-like<br>[Solanum tuberosum]                                |
| c53360.graph_c0 | 16.9475988    | 15.3741409    | 14.8024624    | 9.94123848     | 12.7929097     | 12.8072049     | 4.96E-11  | -1.427966 | down      | PREDICTED: uncharacterized protein LOC105157237<br>[Sesamum indicum]                                       |
| c53362.graph_c0 | 10.8480194    | 12.4761624    | 10.6775498    | 3.40217977     | 0.90104923     | 2.45963177     | 5.666E-12 | -3.330521 | down      | PREDICTED: uncharacterized protein LOC105161926<br>[Sesamum indicum]                                       |
| c53364.graph_c0 | 12.0072761    | 8.82429586    | 8.00788393    | 5.32090713     | 5.34017929     | 3.73777198     | 4.76E-07  | -2.013726 | down      | -                                                                                                          |
| c53370.graph_c0 | 8.2008455     | 8.40451115    | 8.02926564    | 2.33849998     | 3.23962091     | 2.40090371     | 2.738E-08 | -2.647625 | down      | -                                                                                                          |
| c53377.graph_c0 | 0             | 0             | 0             | 53.9736924     | 52.6280378     | 60.9873576     | 1.592E-41 | Inf       | up        | -                                                                                                          |

| #ID             | 0 h-1<br>FPKM | 0 h-2<br>FPKM | 0 h-3<br>FPKM | 48 h-1<br>FPKM | 48 h-2<br>FPKM | 48 h-3<br>FPKM | FDR       | log2FC    | regulated | nr_annotation                                                        |
|-----------------|---------------|---------------|---------------|----------------|----------------|----------------|-----------|-----------|-----------|----------------------------------------------------------------------|
| c53394.graph_c0 | 0             | 0             | 0             | 6.85812962     | 8.13719954     | 10.1298553     | 6.037E-14 | Inf       | up        | uncharacterized protein [Arabidopsis thaliana]                       |
| c53452.graph_c0 | 7.11333189    | 5.53813152    | 5.75538973    | 1.09221088     | 1.28562777     | 1.40377276     | 1.445E-11 | -3.30287  | down      | PREDICTED: trihelix transcription factor GT-3b [Sesamum indicum]     |
| c53470.graph_c0 | 0.97742074    | 0.24459987    | 0.31400609    | 12.6064923     | 14.7859482     | 15.0230103     | 4.595E-09 | 3.775411  | up        | -                                                                    |
| c53487.graph_c0 | 1.15219476    | 1.25819838    | 0.53840578    | 29.7213551     | 36.3931077     | 37.2646534     | 1.38E-29  | 4.117565  | up        | PREDICTED: rapid alkalinization factor-like [Sesamum indicum]        |
| c53493.graph_c0 | 39.7799322    | 37.4424663    | 46.0323412    | 0.91163851     | 0.96577046     | 0.16223409     | 1.915E-72 | -6.928872 | down      | -                                                                    |
| c53497.graph_c0 | 0             | 0.8801094     | 1.12984406    | 28.7551097     | 24.8849016     | 23.0635481     | 2.583E-10 | 4.226856  | up        | PREDICTED: UDP-arabinopyranose mutase 3-like [Sesamum indicum]       |
| c53512.graph_c0 | 0             | 0             | 0             | 19.7039426     | 15.4467141     | 12.0973903     | 2.125E-14 | Inf       | up        | PREDICTED: uncharacterized protein LOC105165055 [Sesamum indicum]    |
| c53522.graph_c0 | 118.232222    | 138.137357    | 123.920424    | 6.63750964     | 14.7844667     | 16.0522491     | 1.48E-121 | -4.37393  | down      | PREDICTED: uncharacterized protein LOC103335027 [Prunus mume]        |
| c53531.graph_c0 | 12.9358859    | 9.55747655    | 11.4778724    | 7.09367964     | 6.16221261     | 6.31191349     | 2.39E-06  | -1.810406 | down      | -                                                                    |
| c53532.graph_c0 | 2.64200429    | 3.82004979    | 2.26338674    | 22.446766      | 23.7796268     | 25.2670449     | 4.783E-05 | 2.018525  | up        | hypothetical protein MIMGU_mgv1a011661mg [Erythranthe guttata]       |
| c53537.graph_c0 | 23.7420201    | 23.0345389    | 29.570684     | 1.68251519     | 1.78242083     | 2.69476542     | 5.386E-21 | -4.656066 | down      | --                                                                   |
| c53541.graph_c0 | 0.31831193    | 0             | 0             | 1.61287344     | 2.25230324     | 1.8917558      | 9.922E-07 | 3.175664  | up        | -                                                                    |
| c53554.graph_c0 | 31.4570878    | 42.5845657    | 33.8788294    | 19.8722201     | 20.1750323     | 15.4719092     | 3.462E-10 | -1.974206 | down      | -                                                                    |
| c53566.graph_c0 | 4.81448288    | 4.81930385    | 3.68261971    | 0              | 0.3356275      | 0.18793363     | 2.978E-19 | -5.714403 | down      | -                                                                    |
| c53570.graph_c0 | 39.5187624    | 31.4438043    | 24.7405208    | 14.0027929     | 14.8342611     | 13.290241      | 4.582E-10 | -2.197432 | down      | -                                                                    |
| c53579.graph_c0 | 0             | 0.37847426    | 0.16195596    | 2.55439341     | 3.81309875     | 4.44245488     | 3.853E-07 | 3.294866  | up        | -                                                                    |
| c53583.graph_c0 | 17.4130014    | 13.7392863    | 9.47706191    | 2.83093988     | 1.19961501     | 2.85481372     | 1.265E-11 | -3.564796 | down      | -                                                                    |
| c53594.graph_c0 | 0             | 0             | 0             | 11.0033158     | 15.4372233     | 15.6121721     | 1.558E-12 | Inf       | up        | PREDICTED: adenosine kinase 2 [Sesamum indicum]                      |
| c53626.graph_c0 | 6.43571241    | 4.2947712     | 7.04493855    | 45.4556517     | 60.4842285     | 60.7669443     | 8.101E-11 | 2.204122  | up        | -                                                                    |
| c53646.graph_c0 | 0.15199084    | 0.60857213    | 0.39062848    | 3.08052518     | 3.11510458     | 3.23940238     | 0.0002466 | 2.014788  | up        | -                                                                    |
| c53652.graph_c0 | 1.65933192    | 0.95203286    | 1.01414612    | 0              | 0              | 0              | 5.439E-20 | -Inf      | down      | hypothetical protein vHEM109090 [Lortetella haminterigena]           |
| c53655.graph_c0 | 1.15083192    | 0.92158744    | 0.29577291    | 19.2960299     | 15.2751941     | 11.5092195     | 1.634E-08 | 3.282602  | up        | -                                                                    |
| c53698.graph_c0 | 0.970612      | 0.64772261    | 1.52444703    | 4.57030996     | 8.52558319     | 8.5752941      | 0.0002906 | 1.750573  | up        | hypothetical protein POPTR_000/s01/509 [Populus trichocarpa]         |
| c53715.graph_c0 | 0             | 1.38558188    | 0             | 17.8529605     | 12.6987601     | 19.0625483     | 6.971E-10 | 4.15953   | up        | PREDICTED: purple acid phosphatase 2 [Sesamum indicum]               |
| c53744.graph_c0 | 0             | 0.19286941    | 0             | 7.10024526     | 5.64138668     | 7.58130664     | 1.871E-10 | 5.715576  | up        | -                                                                    |
| c53761.graph_c0 | 4.78310974    | 5.54388339    | 6.14648538    | 1.62345204     | 0.49138588     | 0.61908765     | 2.416E-10 | -3.587853 | down      | -                                                                    |
| c53783.graph_c0 | 0             | 1.48831356    | 1.91062865    | 28.7649584     | 33.3751746     | 30.0638355     | 1.58E-09  | 3.728906  | up        | -                                                                    |
| c53789.graph_c0 | 0.99292187    | 3.57809809    | 1.78632149    | 11.7087282     | 10.8534806     | 12.8601582     | 0.0040574 | 1.461481  | up        | PREDICTED: PLASMODESMATA CALLOSE-BINDING PROTEIN 3 [Sesamum indicum] |
| c53797.graph_c0 | 7.16445354    | 9.05889809    | 7.75293175    | 0              | 0              | 0              | 6.093E-19 | -Inf      | down      | -                                                                    |

| #ID             | 0 h-1<br>FPKM | 0 h-2<br>FPKM | 0 h-3<br>FPKM | 48 h-1<br>FPKM | 48 h-2<br>FPKM | 48 h-3<br>FPKM | FDR       | log2FC    | regulated | nr_annotation                                                          |
|-----------------|---------------|---------------|---------------|----------------|----------------|----------------|-----------|-----------|-----------|------------------------------------------------------------------------|
| c53803.graph_c0 | 5.85961153    | 5.44651625    | 4.3027616     | 5.0126666      | 2.04242786     | 5.6610746      | 0.0072764 | -1.303197 | down      | -                                                                      |
| c53824.graph_c0 | 1.93995142    | 0.52960745    | 1.1331429     | 11.0482059     | 6.19635943     | 8.52951475     | 0.0015075 | 1.832967  | up        | -                                                                      |
| c53867.graph_c0 | 8.42534016    | 5.95325426    | 6.36876217    | 74.8802092     | 59.4948764     | 74.7533208     | 5.369E-08 | 2.320422  | up        | PREDICTED: 40S ribosomal protein S19-1 [Sesamum indicum]               |
| c53882.graph_c0 | 67.0435898    | 82.1837206    | 55.7464905    | 43.5987726     | 32.5412727     | 28.8015509     | 7.346E-12 | -1.97365  | down      | -                                                                      |
| c53904.graph_c0 | 0.28357327    | 0             | 0             | 11.4948325     | 16.8822785     | 13.7148622     | 7.41E-12  | 6.211863  | up        | PREDICTED: alpha-galactosidase-like [Sesamum indicum]                  |
| c53924.graph_c0 | 0             | 0.25308776    | 0             | 17.9354339     | 5.67544936     | 6.01047266     | 0.0047269 | 5.888772  | up        | unnamed protein product [Vitis vinifera]                               |
| c53936.graph_c0 | 9.60426716    | 11.1219447    | 11.8578689    | 6.24570165     | 7.16794387     | 8.79919731     | 0.0001611 | -1.576044 | down      | -                                                                      |
| c53939.graph_c0 | 0.24936784    | 0             | 0             | 17.115177      | 29.8134657     | 36.1816072     | 7.437E-15 | 7.373783  | up        | -                                                                      |
| c53960.graph_c0 | 3.04283179    | 3.65505447    | 4.30117525    | 46.8143603     | 46.0304876     | 42.9022961     | 1.004E-09 | 2.605828  | up        | -                                                                      |
| c53976.graph_c0 | 0             | 0             | 0             | 1.05573512     | 1.7206513      | 1.95103405     | 1.563E-11 | Inf       | up        | PREDICTED: uncharacterized protein LOC105155633 [Sesamum indicum]      |
| c53979.graph_c0 | 0             | 0.258687      | 0             | 13.3325324     | 23.2040451     | 22.6671993     | 6.412E-15 | 6.823092  | up        | -                                                                      |
| c53980.graph_c0 | 0.99722046    | 0.95068479    | 1.34249005    | 0.04374783     | 0.04634553     | 0              | 1.198E-16 | -6.20145  | down      | hypothetical protein VITISV_003451 [Vitis vinifera]                    |
| c53984.graph_c0 | 2.03709422    | 1.03247294    | 1.25916931    | 0              | 0              | 0              | 2.671E-16 | -Inf      | down      | Animal heme peroxidase homologue [Chondrus crispus]                    |
| c53999.graph_c0 | 2.79947101    | 1.40113713    | 0.44967888    | 21.599588      | 17.4177517     | 12.6215534     | 5.57E-05  | 2.475643  | up        | -                                                                      |
| c54007.graph_c0 | 0             | 0.19677207    | 0.25260695    | 25.5348066     | 39.1376623     | 48.8253713     | 3.46E-17  | 6.940836  | up        | PREDICTED: probable aquaporin PIP2-5 [Sesamum indicum]                 |
| c54024.graph_c0 | 4.07715466    | 5.37981283    | 3.81040376    | 0              | 0              | 0.1519178      | 1.974E-18 | -7.48753  | down      | PREDICTED: 17.3 kDa class I heat shock protein-like [Sesamum indicum]  |
| c54095.graph_c0 | 0             | 0             | 0             | 16.6364968     | 13.5043729     | 20.5704788     | 8.762E-16 | Inf       | up        | -                                                                      |
| c54121.graph_c0 | 12.6478425    | 9.64610089    | 12.7701973    | 1.66457393     | 1.46951186     | 2.22169181     | 2.552E-12 | -3.730503 | down      | -                                                                      |
| c54141.graph_c0 | 13.2980161    | 12.9655831    | 15.0911226    | 0.79551946     | 0              | 0.42470906     | 1.402E-29 | -6.072215 | down      | -                                                                      |
| c54197.graph_c0 | 1.99875535    | 0.82639955    | 1.3400764     | 0              | 0              | 0              | 3.281E-11 | -Inf      | down      | Subunit of cleavage factor I [Komagataella pastoris GS115]             |
| c54198.graph_c0 | 1.54837258    | 1.54992304    | 0.99486003    | 17.8307726     | 17.0005874     | 11.106         | 3.058E-05 | 2.479449  | up        | -                                                                      |
| c54205.graph_c0 | 6.46064145    | 7.52887526    | 6.07174361    | 1.24369403     | 0.94110216     | 1.42281189     | 3.399E-15 | -3.489682 | down      | -                                                                      |
| c54319.graph_c0 | 0.30912434    | 0.92830165    | 0.79447403    | 5.69571011     | 7.84408848     | 8.10881376     | 3.067E-05 | 2.385607  | up        | -                                                                      |
| c54344.graph_c0 | 0             | 0.65673867    | 0.28103032    | 8.86490382     | 10.0316059     | 8.96356604     | 1.515E-08 | 3.872192  | up        | -                                                                      |
| c54436.graph_c0 | 3.74390787    | 5.30918051    | 5.0783515     | 2.39523065     | 0.30449477     | 0.51150284     | 1.1E-10   | -3.120984 | down      | PREDICTED: uncharacterized protein LOC104248461 [Nicotiana sylvestris] |
| c54544.graph_c0 | 0             | 0             | 0             | 10.2648726     | 7.93536406     | 5.67765684     | 2.445E-08 | Inf       | up        | -                                                                      |
| c54570.graph_c0 | 1.20042506    | 1.10919425    | 1.00861898    | 0              | 0              | 0.03784738     | 2.15E-18  | -7.49339  | down      | -                                                                      |
| c54603.graph_c0 | 1.87925616    | 1.20930297    | 1.29370638    | 0              | 0              | 0              | 3.255E-19 | -Inf      | down      | hypothetical protein EMIHURAFT_349549 [Emiliania huxleyi CCMP1516]     |
| c54753.graph_c0 | 0.35852187    | 0             | 0             | 18.1661552     | 15.0459648     | 22.0420032     | 3.869E-12 | 6.27211   | up        | Aldo-keto reductase family 4 member C9 [Cossyrium arboreum]            |

| #ID             | 0 h-1<br>FPKM | 0 h-2<br>FPKM | 0 h-3<br>FPKM | 48 h-1<br>FPKM | 48 h-2<br>FPKM | 48 h-3<br>FPKM | FDR       | log2FC    | regulated | nr_annotation                                                                                 |
|-----------------|---------------|---------------|---------------|----------------|----------------|----------------|-----------|-----------|-----------|-----------------------------------------------------------------------------------------------|
| c54836.graph_c0 | 0.20630901    | 0.2065156     | 0.5302305     | 4.94169832     | 7.0472906      | 5.41180732     | 5.497E-07 | 3.172171  | up        | PREDICTED: 3'-hydroxy-N-methyl-(S)-coclaurine 4-O-methyltransferase-like [Sesamum indicum]    |
| c54893.graph_c0 | 14.1229337    | 15.7078618    | 13.6113967    | 1.80707884     | 0.38287618     | 0.32158558     | 2.861E-17 | -5.095862 | down      | -                                                                                             |
| c55206.graph_c0 | 1.36300467    | 0.73675954    | 0.87575748    | 0              | 0              | 0              | 4.092E-20 | -Inf      | down      | hypothetical protein GUITHDRAFT_143910 [Guillardia theta CCMP2712]                            |
| c55343.graph_c0 | 0.23080892    | 0.23104004    | 0.59319721    | 5.10326965     | 5.18103308     | 6.24368064     | 1.125E-06 | 2.939128  | up        | -                                                                                             |
| c55419.graph_c0 | 1.08967852    | 0.65094319    | 0.49687356    | 0              | 0              | 0              | 5.633E-13 | -Inf      | down      | PREDICTED: peroxisomal acyl-coenzyme A oxidase 1-like [Cicer arietinum]                       |
| c55533.graph_c0 | 65.4266014    | 66.595916     | 48.6505878    | 10.1587505     | 7.533375       | 9.94311457     | 7.355E-32 | -3.719595 | down      | Ubiquitin [Medicago truncatula]                                                               |
| c55599.graph_c0 | 0.80689701    | 0.63211695    | 0.90164748    | 0.03232027     | 0.30815464     | 0.20130866     | 1.039E-08 | -3.156002 | down      | Disease resistance family protein / LRR family protein, putative [Theobroma cacao]            |
| c55911.graph_c0 | 0.18129039    | 0.18147192    | 0.23296533    | 4.34242979     | 4.60027782     | 6.39024309     | 6.425E-08 | 3.661885  | up        | -                                                                                             |
| c56027.graph_c0 | 5.6848328     | 10.74877      | 6.89938882    | 0              | 0              | 0              | 3.711E-14 | -Inf      | down      | -                                                                                             |
| c56545.graph_c0 | 0.49493492    | 0             | 0.31800548    | 4.78764648     | 6.038013       | 4.26001905     | 5.298E-07 | 3.194437  | up        | -                                                                                             |
| c57000.graph_c0 | 1.01810985    | 0.84927444    | 0.65415573    | 20.3222326     | 28.3188382     | 24.3419621     | 1.828E-14 | 3.836611  | up        | -                                                                                             |
| c57433.graph_c0 | 1.21464826    | 0.63556556    | 0.92233293    | 0              | 0              | 0              | 2.707E-17 | -Inf      | down      | ATP-binding cassette transporter, subfamily F, member 4, SmABCF4 [Selaginella moellendorffii] |
| c58690.graph_c0 | 0             | 0             | 0.68860503    | 6.91140582     | 8.36776734     | 11.6405553     | 2.891E-09 | 4.233007  | up        | hypothetical protein MIMGU_mgv1a015676mg [Erythranthe guttata]                                |
| c60866.graph_c0 | 7.69544718    | 11.5547295    | 8.72554792    | 0              | 0              | 0              | 7.788E-25 | -Inf      | down      | hypothetical protein MIMGU_mgv1a015592mg [Erythranthe guttata]                                |
| c62784.graph_c0 | 0.57135043    | 0.50329185    | 0.41115644    | 0              | 0              | 0              | 2.922E-19 | -Inf      | down      | predicted protein [Hordeum vulgare subsp. vulgare]                                            |
| c64432.graph_c0 | 2.69177596    | 0.38492448    | 0.49414838    | 19.1301911     | 16.8884315     | 18.5980335     | 1.604E-06 | 2.931964  | up        | -                                                                                             |

Transcriptomic analysis of seed germination improvement of *Andrographis paniculata* responding to air plasma treatment  
Jia-Yun Tong 1\*, Rui He 2\*, Xiao-Ting Tang 2, Ming-Zhi Li 3 and Jing-Lin Wan 4
