# Supplementary material for: Transcriptomic analysis of seed germination improvement of Andrographis paniculata responding to air plasma treatment
Source: PubMed Central journal article supplement (PMC7580921; doi:10.1371/journal.pone.0240939), 2020-10-22
Supplement: pone.0240939.s009.pdf [file pone.0240939.s009.pdf]

**S7 Table. Differentially expressed genes at 28 HAS (plasma vs. control).**

| #ID             | ctrl 28h-<br>1_FPKM | ctrl 28h-<br>2_FPKM | ctrl 28h-<br>3_FPKM | plasma 28h-<br>1_FPKM | plasma 28h-<br>2_FPKM | plasma 28h-<br>3_FPKM | FDR      | log2FC   | regulated | annotation                                                                   | database  |
|-----------------|---------------------|---------------------|---------------------|-----------------------|-----------------------|-----------------------|----------|----------|-----------|------------------------------------------------------------------------------|-----------|
| c15435.graph_c0 | 14.6175374          | 13.8463951          | 9.81990012          | 27.7898082            | 26.4727798            | 30.9284723            | 1.60E-11 | 1.145803 | up        | uncharacterized protein LOC105150981 [Sesamum indicum]                       | nr        |
| c15435.graph_c1 | 5.37260991          | 6.93213681          | 4.95270675          | 15.1336147            | 13.2623459            | 14.1649216            | 1.09E-05 | 1.295031 | up        | SEY1 [Theobroma cacao]                                                       | nr        |
| c18820.graph_c0 | 8.67781393          | 6.59073165          | 7.11669063          | 23.4226483            | 26.1157082            | 23.4317495            | 1.75E-47 | 1.696298 | up        | hypothetical protein MIMGU_mgv1a014625mg [Erythranthe guttata]               | nr        |
| c20200.graph_c0 | 0.76885908          | 1.02878076          | 0.42404918          | 2.1798841             | 2.08751768            | 2.26388607            | 0.003297 | 1.547356 | up        | BAG family molecular chaperone regulator 1-like [Sesamum indicum]            | nr        |
| c20387.graph_c0 | 10.030714           | 8.76350242          | 6.84320239          | 32.7523391            | 29.5391014            | 27.8054652            | 2.60E-36 | 1.804428 | up        | uncharacterized protein LOC105150845 [Sesamum indicum]                       | nr        |
| c21137.graph_c0 | 69.9251861          | 67.4232596          | 54.2832789          | 228.51831             | 215.28593             | 195.903522            | 4.25E-48 | 1.730672 | up        | Wound-induced protein, hypothetical protein L484_018717 [Morus notabilis]    | nr        |
| c21161.graph_c0 | 6.24188275          | 7.11206895          | 5.88682602          | 0.86876704            | 1.80851278            | 1.0239765             | 5.39E-32 | -2.38697 | down      | 9-cis-epoxycarotenoid dioxygenase NCED5, chloroplastic [Sesamum indicum]     | nr        |
| c21351.graph_c0 | 1.14595231          | 1.1713691           | 1.37302542          | 2.71940428            | 2.56572068            | 2.36860798            | 0.001363 | 1.045399 | up        | Senescence regulator, uncharacterized protein LOC105175340 [Sesamum indicum] | nr        |
| c21712.graph_c0 | 6.93433492          | 5.13889851          | 5.70396374          | 1.68517372            | 0.82993848            | 1.25008               | 6.55E-07 | -2.24677 | down      | -                                                                            |           |
| c22005.graph_c0 | 3.40998049          | 2.97024916          | 3.38527445          | 0.62966898            | 0.67513181            | 0.9954967             | 1.92E-11 | -2.09224 | down      | uncharacterized protein LOC105178909 [Sesamum indicum]                       | nr        |
| c23208.graph_c0 | 21.1720884          | 19.7295128          | 17.7032436          | 9.20876626            | 9.5464529             | 8.90581104            | 7.85E-17 | -1.0913  | down      | uncharacterized protein LOC105108502 [Sesamum indicum]                       | nr        |
| c24261.graph_c0 | 8.4851964           | 11.4833546          | 11.780045           | 3.79314001            | 4.07279434            | 3.97353069            | 2.58E-09 | -1.42935 | down      | -                                                                            |           |
| c24366.graph_c0 | 4.36809352          | 3.76732368          | 3.58878268          | 8.44397933            | 7.99218268            | 8.22074307            | 8.05E-06 | 1.064474 | up        | chaperone protein dnaJ 20, chloroplastic-like [Sesamum indicum]              | nr        |
| c25198.graph_c0 | 42.9737056          | 37.6538174          | 30.6293808          | 88.2321425            | 83.8537665            | 91.6953778            | 4.06E-27 | 1.237179 | up        | hypothetical protein MIMGU_mgv1a026311mg [Erythranthe guttata]               | nr        |
| c26100.graph_c0 | 9.550106            | 11.2714064          | 11.2366381          | 3.22731725            | 5.97609748            | 3.3029894             | 1.32E-08 | -1.36629 | down      | Zinc finger CCCH domain-containing protein 30 [Arabidopsis thaliana]         | Swissprot |
| c26100.graph_c1 | 12.8521207          | 16.8709201          | 15.3591805          | 3.76788424            | 7.56955278            | 4.49654805            | 4.19E-08 | -1.51752 | down      | Zinc finger CCCH domain-containing protein 29-like [Sesamum indicum]         | nr        |
| c26161.graph_c0 | 3.19645213          | 3.45454008          | 3.52588128          | 6.59101291            | 7.43883336            | 8.06731906            | 0.007062 | 1.11181  | up        | Ethylene-responsive transcription factor RAP2-10 [Arabidopsis thaliana]      | Swissprot |
| c26293.graph_c1 | 13.2257589          | 13.0174159          | 12.3606033          | 29.8811604            | 28.3144527            | 29.0115999            | 1.45E-31 | 1.168167 | up        | -                                                                            |           |
| c26653.graph_c0 | 1.20872176          | 1.11969975          | 1.48961087          | 2.96504573            | 2.99725331            | 2.05127546            | 0.001329 | 1.061949 | up        | bZIP transcription factor, basic leucine zipper 61-like [Sesamum indicum]    | nr        |
| c26801.graph_c0 | 3.27078823          | 4.13167584          | 3.98506581          | 10.1164384            | 9.54938608            | 9.66202167            | 1.36E-05 | 1.358196 | up        | hypothetical protein MIMGU_mgv1a027149mg, partial [Erythranthe guttata]      | nr        |
| c27133.graph_c0 | 13.9158086          | 11.4208969          | 12.4011713          | 41.5623776            | 41.3335983            | 35.3009243            | 2.60E-37 | 1.638828 | up        | chaperone protein dnaJ 11, chloroplastic-like [Sesamum indicum]              | nr        |
| c28248.graph_c0 | 0.4922958           | 0.79806713          | 0.93673061          | 2.28398163            | 1.97629539            | 2.07078929            | 2.59E-05 | 1.502117 | up        | -                                                                            |           |

| #ID             | ctrl 28h-<br>1_FPKM | ctrl 28h-<br>2_FPKM | ctrl 28h-<br>3_FPKM | plasma 28h-<br>1_FPKM | plasma 28h-<br>2_FPKM | plasma 28h-<br>3_FPKM | FDR      | log2FC   | regulated | annotation                                                                    | database  |
|-----------------|---------------------|---------------------|---------------------|-----------------------|-----------------------|-----------------------|----------|----------|-----------|-------------------------------------------------------------------------------|-----------|
| c34236.graph_c0 | 1.01207751          | 1.22214813          | 1.00474479          | 2.30581743            | 2.61188453            | 2.15520502            | 2.37E-07 | 1.119042 | up        | receptor protein kinase CLAVATA1-like [Sesamum indicum]                       | nr        |
| c35279.graph_c0 | 89.2379896          | 95.7212728          | 85.9478828          | 37.7655757            | 52.3724521            | 39.3810661            | 1.55E-16 | -1.07276 | down      | secoisolaricresinol acyltransferase-like [Sesamum indicum]                    | nr        |
| c37513.graph_c0 | 2.2757353           | 3.05678568          | 2.48517182          | 10.5581596            | 9.29470247            | 9.90767779            | 2.25E-12 | 1.921796 | up        | -                                                                             |           |
| c38035.graph_c0 | 4.88564784          | 6.12063449          | 6.37461464          | 2.19471393            | 2.2739912             | 1.70279314            | 1.67E-12 | -1.50096 | down      | hypothetical protein MIMGU_mgv1a008930mg [Erythranthe guttata]                | nr        |
| c40715.graph_c2 | 39.6985105          | 36.9751338          | 26.5244929          | 100.621086            | 96.8175419            | 92.9578975            | 5.57E-40 | 1.483893 | up        | Wound-induced protein, uncharacterized protein LOC105174779 [Sesamum indicum] | nr        |
| c41309.graph_c0 | 19.5000822          | 11.3597764          | 10.9766391          | 2.02079977            | 1.82459272            | 2.02948444            | 8.21E-05 | -2.84153 | down      | -                                                                             |           |
| c42341.graph_c0 | 2.4156905           | 1.61617126          | 2.99773538          | 0.25943228            | 0.60903187            | 1.10081205            | 0.008269 | -1.84048 | down      | Zinc knuckle                                                                  | Pfam      |
| c42797.graph_c0 | 69.5098685          | 69.6027991          | 62.4328869          | 27.9946258            | 37.3394153            | 28.8321544            | 2.41E-18 | -1.10614 | down      | WRKY transcription factor 33 [Sesamum indicum]                                | nr        |
| c43225.graph_c0 | 11.7027842          | 11.4016126          | 13.4207873          | 2.65231651            | 4.36697571            | 5.98356617            | 3.26E-06 | -1.49591 | down      | 60S ribosomal protein L39                                                     | Swissprot |
| c43253.graph_c0 | 7.0370302           | 7.45000565          | 7.54049345          | 17.7058977            | 17.3904815            | 13.8840487            | 1.89E-08 | 1.145208 | up        | ethylene-responsive transcription factor CRF4-like [Sesamum indicum]          | nr        |
| c43253.graph_c1 | 1.55858205          | 2.36621619          | 1.50430951          | 3.71591159            | 4.26190889            | 3.1960537             | 0.000348 | 1.033479 | up        | ethylene-responsive transcription factor CRF4-like [Sesamum indicum]          | nr        |
| c43379.graph_c0 | 13.2176573          | 9.18313549          | 10.7599519          | 2.14629299            | 2.76843048            | 5.33747064            | 4.76E-05 | -1.69981 | down      | 60S ribosomal protein L37-2                                                   | Swissprot |
| c43483.graph_c0 | 0.70996003          | 1.01281438          | 0.88806843          | 0.40623828            | 0.43618874            | 0.43003734            | 0.001211 | -1.04341 | down      | NB-ARC domain;Leucine rich repeat                                             | Pfam      |
| c43633.graph_c0 | 14.7884744          | 9.70367612          | 10.7051355          | 3.01758632            | 5.5925949             | 5.57263205            | 0.004418 | -1.3199  | down      | 60S ribosomal protein L26-1                                                   | Swissprot |
| c44035.graph_c0 | 6.97128182          | 4.06526883          | 3.78940707          | 0.10604233            | 0.06383086            | 0.23074581            | 9.25E-10 | -5.2163  | down      | hypothetical protein EPUS_08767 [Endocarpon pusillum Z07020]                  | nr        |
| c44054.graph_c0 | 34.7965078          | 32.0706837          | 31.5152111          | 63.5673822            | 65.7527442            | 71.2709812            | 2.08E-33 | 1.020281 | up        | PREDICTED: uncharacterized protein LOC105157696 [Sesamum indicum]             | nr        |
| c44265.graph_c0 | 7.60501761          | 5.75499711          | 5.21050653          | 1.32518674            | 1.79477907            | 1.89234773            | 1.30E-07 | -1.89799 | down      | Cold shock, CspA, partial [Metarhizium brunneum ARSEF 3297]                   | nr        |
| c45752.graph_c0 | 13.753782           | 9.92946525          | 13.8464446          | 3.09563284            | 4.28276275            | 7.94471239            | 0.006738 | -1.29792 | down      | 60S ribosomal protein L6                                                      | nr        |
| c46166.graph_c0 | 10.5030765          | 7.04816195          | 9.44175302          | 2.68582259            | 4.09948248            | 4.95721151            | 0.002133 | -1.20815 | down      | 40S ribosomal protein S18                                                     | nr        |
| c46906.graph_c0 | 3.02772904          | 2.3239255           | 1.8034755           | 0.20067138            | 0.24158326            | 0.70956691            | 6.92E-06 | -2.64097 | down      | Domain of unknown function (DUF1857)                                          | Pfam      |
| c47065.graph_c0 | 10.0769233          | 6.75965437          | 6.89925091          | 1.93453983            | 3.00821948            | 3.55177959            | 0.001139 | -1.49073 | down      | 60S ribosomal protein L30-2                                                   | nr        |
| c47311.graph_c0 | 1.47479581          | 1.45725602          | 1.0736811           | 0.2280747             | 0.44618182            | 0.37221419            | 4.56E-05 | -1.9452  | down      | hypothetical protein SELMODRAFT_271243 [Selaginella moellendorffii]           | nr        |
| c47343.graph_c0 | 1.01211424          | 1.07151122          | 1.72248215          | 0.03726709            | 0.13459475            | 0.21286748            | 1.65E-06 | -3.31018 | down      | udp-d-glucose 6-dehydrogenase [Thalassiosira pseudonana CCMP1335]             | nr        |
| c47459.graph_c0 | 3.358564            | 2.80767436          | 2.84629431          | 0.69675113            | 0.68629194            | 1.96405844            | 0.00279  | -1.43402 | down      | -                                                                             |           |
| c47708.graph_c0 | 2.38568211          | 2.05212178          | 2.11464047          | 0.39529472            | 0.29742839            | 1.4515077             | 0.006283 | -1.61522 | down      | -                                                                             |           |
| c47954.graph_c0 | 12.3978809          | 7.95100193          | 9.94112185          | 1.99105427            | 3.59547065            | 4.75370511            | 0.000735 | -1.55797 | down      | 40S ribosomal protein S11 [Auxenocarpus prototrichoides]                      | nr        |

| #ID             | ctrl 28h-<br>1_FPKM | ctrl 28h-<br>2_FPKM | ctrl 28h-<br>3_FPKM | plasma 28h-<br>1_FPKM | plasma 28h-<br>2_FPKM | plasma 28h-<br>3_FPKM | FDR      | log2FC   | regulated | annotation                                                                         | database  |
|-----------------|---------------------|---------------------|---------------------|-----------------------|-----------------------|-----------------------|----------|----------|-----------|------------------------------------------------------------------------------------|-----------|
| c47967.graph_c0 | 3.71530168          | 2.63712436          | 3.64048243          | 0.8208074             | 1.98752797            | 1.43087684            | 0.003295 | -1.24556 | down      | hypothetical protein FOMPIDRAFT_1023471 [Fomitopsis pinicola FP-58527 SS1]         | nr        |
| c48037.graph_c1 | 1.60744268          | 1.59174844          | 1.48574149          | 0.81434104            | 0.23219167            | 0.76941601            | 0.00418  | -1.37287 | down      | Cathepsin propeptide inhibitor domain (I29)                                        | Pfam      |
| c48143.graph_c3 | 179.044313          | 154.091627          | 145.432786          | 397.408776            | 369.060911            | 357.624118            | 6.48E-41 | 1.223739 | up        | haloacid dehalogenase-like hydrolase domain-containing protein 3 [Sesamum indicum] | nr        |
| c48359.graph_c0 | 0.15586239          | 0.57753269          | 0.46419941          | 3.85661726            | 4.78797522            | 4.032053              | 1.58E-09 | 3.399291 | up        | -                                                                                  |           |
| c48392.graph_c0 | 0.90448258          | 0.77580342          | 1.16398256          | 0.12951548            | 0.32743293            | 0.295914              | 4.74E-05 | -1.92431 | down      | 6-phosphogluconate dehydrogenase, decarboxylating 3                                | Swissprot |
| c48428.graph_c0 | 16.3202197          | 10.2751676          | 12.2742244          | 3.76945304            | 6.7575998             | 6.15168579            | 0.009415 | -1.2294  | down      | 60S ribosomal protein L10a-2                                                       | Swissprot |
| c48527.graph_c0 | 2.38788878          | 2.31033352          | 1.63307174          | 0.369283              | 0.48161811            | 0.63614515            | 1.04E-07 | -2.09765 | down      | Intracellular ribonuclease LX (Precursor)                                          | Swissprot |
| c48617.graph_c0 | 0.92167869          | 0.85379731          | 0.67330257          | 0.30927637            | 0.25496517            | 0.34014681            | 5.75E-05 | -1.44472 | down      | hypothetical protein VITISV_012155 [Vitis vinifera]                                | nr        |
| c48651.graph_c0 | 1.21540834          | 1.19626223          | 1.09348346          | 0.29368885            | 0.55686434            | 0.62308403            | 0.008846 | -1.25728 | down      | pyruvate dehydrogenase E1 component subunit alpha [Galdieria sulphuraria]          | nr        |
| c48670.graph_c0 | 0.87938776          | 0.56776622          | 0.60846598          | 0.18544888            | 0.26046681            | 0.26902181            | 0.002527 | -1.53239 | down      | hypothetical protein AMTR_s00036p00173790 [Amborella trichopoda]                   | nr        |
| c48880.graph_c0 | 4.78808914          | 3.66406553          | 5.47674164          | 0.16097173            | 0.58136952            | 0.7224339             | 5.74E-15 | -3.25539 | down      | Glutathione S-transferase, C-terminal domain                                       | Pfam      |
| c48922.graph_c1 | 7.68460083          | 5.79052916          | 5.0100398           | 1.72940355            | 2.80267303            | 2.74999019            | 0.001185 | -1.35278 | down      | -                                                                                  |           |
| c48989.graph_c0 | 1.75113074          | 1.01385029          | 1.7819045           | 0.37236297            | 0.58072438            | 0.49720115            | 0.002179 | -1.6565  | down      | Probable cinnamyl alcohol dehydrogenase 2                                          | Swissprot |
| c49019.graph_c0 | 1.29369597          | 1.19841563          | 0.91145493          | 0.32269018            | 0.11654359            | 0.50029385            | 9.94E-05 | -1.86247 | down      | Guanine nucleotide-binding protein-like NSN1                                       | Swissprot |
| c49029.graph_c0 | 1.96205764          | 1.43201119          | 1.23953589          | 0.2298704             | 0.62265426            | 0.60023158            | 0.00147  | -1.68226 | down      | Rac-like GTP-binding protein ARAC2 (Precursor)                                     | Swissprot |
| c49091.graph_c0 | 2.12386891          | 1.41410222          | 1.97670095          | 0.46188671            | 0.69506732            | 0.54440502            | 0.00035  | -1.70504 | down      | -                                                                                  |           |
| c49145.graph_c0 | 0.80151799          | 0.6629343           | 0.73887433          | 0.11067269            | 0.23982495            | 0.23480083            | 0.000108 | -1.92007 | down      | Pescadillo homolog                                                                 | Swissprot |
| c49147.graph_c0 | 1.12034788          | 0.66306098          | 0.95775423          | 0.2165749             | 0.19554683            | 0.29453892            | 4.15E-05 | -1.96288 | down      | Probable alpha-glucosidase Os06g0675700 (Precursor)                                | Swissprot |
| c49158.graph_c0 | 14.1401541          | 9.25032017          | 10.9728696          | 3.59546684            | 5.88071844            | 5.00201057            | 0.001676 | -1.25584 | down      | 5'-adenosyl-methionine synthetase [Uncaria                                         | nr        |
| c49175.graph_c0 | 17.5065309          | 11.7397094          | 14.0441958          | 3.91974055            | 5.72026733            | 8.62844764            | 0.006589 | -1.25173 | down      | 60S ribosomal protein L1a, putative [Klebsiella pneumoniae]                        | nr        |
| c49225.graph_c0 | 2.55890015          | 1.89635031          | 1.12904905          | 0.26381975            | 0.3970075             | 0.50230777            | 0.00717  | -2.27251 | down      | V-type proton ATPase subunit E3                                                    | nr        |
| c49292.graph_c0 | 0.97232832          | 0.90071662          | 0.77758956          | 0.12530745            | 0.4148499             | 0.27266629            | 8.60E-05 | -1.71449 | down      | phosphoenolpyruvate carboxykinase [Neocallimastix frontalis]                       | nr        |
| c49371.graph_c0 | 1.10321689          | 0.88866546          | 0.90475013          | 0.3708927             | 0.33488134            | 0.30264542            | 0.00711  | -1.53072 | down      | CD36 family                                                                        | Pfam      |
| c49390.graph_c0 | 4.43849672          | 3.06501293          | 7.13025743          | 0.06240055            | 0.1126837             | 0.05091834            | 1.19E-07 | -6.02465 | down      | hypothetical protein CHLNCDRAFT_33886 [Chlorella variabilis]                       | nr        |
| c49437.graph_c1 | 1.45743989          | 1.42510541          | 1.56745379          | 0.34434681            | 0.56529615            | 0.9195846             | 0.003249 | -1.28809 | down      | Lipase (class 3)                                                                   | Pfam      |
| c49480.graph_c0 | 1.64743474          | 1.0174011           | 1.93286212          | 0.54042762            | 0.24397774            | 0.53548121            | 0.003297 | -1.80603 | down      | GDP dissociation inhibitor                                                         | Pfam      |
| c49497.graph_c0 | 5.54590979          | 2.96391642          | 4.12929636          | 0.32987141            | 1.26583255            | 1.48044806            | 0.003297 | -2.04669 | down      | -                                                                                  |           |
| c49567.graph_c0 | 36.1634352          | 29.3893424          | 34.1722263          | 8.62622332            | 13.7532292            | 19.075756             | 1.28E-05 | -1.27297 | down      | predicted protein [Hordeum vulgare subsp. vulgare]                                 | nr        |
| c49590.graph_c0 | 1.36555296          | 1.04174854          | 1.11642525          | 0.09316786            | 0.11216245            | 0.25341404            | 1.59E-09 | -2.94708 | down      | lupus La protein [Galdieria sulphuraria]                                           | nr        |

| #ID             | ctrl 28h-<br>1_FPKM | ctrl 28h-<br>2_FPKM | ctrl 28h-<br>3_FPKM | plasma 28h-<br>1_FPKM | plasma 28h-<br>2_FPKM | plasma 28h-<br>3_FPKM | FDR      | log2FC   | regulated | annotation                                                                         | database  |
|-----------------|---------------------|---------------------|---------------------|-----------------------|-----------------------|-----------------------|----------|----------|-----------|------------------------------------------------------------------------------------|-----------|
| c49618.graph_c2 | 1.25172275          | 0.79510884          | 1.4911845           | 0.19357683            | 0.37453227            | 0.51900193            | 0.007879 | -1.70825 | down      | KH domain                                                                          | Pfam      |
| c49630.graph_c1 | 1.77661589          | 1.47697185          | 1.4471745           | 0.07044889            | 0.09541311            | 0.22994288            | 8.43E-14 | -3.57544 | down      | abanyuroiase domain-containing protein 4 [Mavirus domestical]                      | nr        |
| c49667.graph_c0 | 2.43873052          | 1.79702625          | 1.76077192          | 0.47143199            | 0.61914019            | 0.69942664            | 2.38E-05 | -1.75237 | down      | eukaryotic translation initiation factor 3 subunit D-like [Pyrus x bretschneideri] | nr        |
| c49672.graph_c0 | 1.84288605          | 1.31535126          | 1.46962563          | 0.25696653            | 0.37966366            | 0.40030312            | 6.48E-10 | -2.1661  | down      | nitric oxide dioxygenase [Cladophialophora psammophila CBS 110553]                 | nr        |
| c49717.graph_c0 | 2.66620547          | 2.4698402           | 2.37117071          | 0.42950438            | 0.69804394            | 0.94627459            | 5.05E-07 | -1.86271 | down      | L,D-transpeptidase catalytic domain                                                | Pfam      |
| c49737.graph_c0 | 2.51454357          | 3.05726945          | 2.18428451          | 0.91141395            | 1.04236703            | 1.38825183            | 0.007448 | -1.22137 | down      | Cycloartenol-C-24-methyltransferase                                                | Swissprot |
| c49744.graph_c0 | 2.77681632          | 1.95718828          | 1.91770274          | 0.46677173            | 0.379306              | 0.91411661            | 4.06E-05 | -1.92445 | down      | S-Adenosylmethionine decarboxylase [Ectocarpus siliculosus]                        | nr        |
| c49756.graph_c0 | 0.63288089          | 0.50540465          | 0.47663799          | 0.13499858            | 0.22854574            | 0.24785491            | 0.007879 | -1.40931 | down      | Glycine dehydrogenase (decarboxylating), mitochondrial (Precursor)                 | Swissprot |
| c49770.graph_c0 | 57.0974024          | 37.2775798          | 45.1750063          | 12.6216705            | 17.3733678            | 25.6638752            | 0.00309  | -1.33329 | down      | Elongation factor 1-alpha [Auxenocnemea protothecoides]                            | nr        |
| c49789.graph_c0 | 6.01490475          | 3.71460583          | 3.12783715          | 0.36912498            | 0.33328525            | 0.36144356            | 8.51E-06 | -3.60485 | down      | -                                                                                  |           |
| c49807.graph_c0 | 2.69056103          | 2.25503036          | 1.93970366          | 0.54488075            | 0.98395246            | 1.15196545            | 9.66E-05 | -1.36871 | down      | eukaryotic initiation factor 4A [Ectocarpus siliculosus]                           | nr        |
| c49812.graph_c0 | 0.60951861          | 0.26349294          | 0.24204101          | 1.16255272            | 1.3901116             | 1.41013092            | 4.52E-05 | 1.818459 | up        | Short-chain dehydrogenase/reductase SDR [Macrophomina phaseolina MS6]              | nr        |
| c49858.graph_c0 | 6.82142727          | 4.86813575          | 5.40123626          | 2.03972892            | 2.96396014            | 3.47183884            | 0.004836 | -1.01964 | down      | ABC transporter F family member 1                                                  | Swissprot |
| c49863.graph_c0 | 1.45685702          | 0.89970661          | 1.0330727           | 0.16092893            | 0.41169391            | 0.50338065            | 0.00442  | -1.66342 | down      | -                                                                                  |           |
| c49864.graph_c0 | 0.89185714          | 0.82617212          | 0.96588594          | 0.2507713             | 0.31133158            | 0.30694099            | 0.002507 | -1.63398 | down      | Fructose-bisphosphate aldolase, cytoplasmic isozyme                                | Swissprot |
| c49883.graph_c0 | 2.27607671          | 1.68675545          | 2.10894697          | 0.27377113            | 0.67094336            | 0.89358002            | 1.51E-05 | -1.73042 | down      | Aconitate hydratase, cytoplasmic                                                   | Swissprot |
| c49887.graph_c0 | 1.31957399          | 0.98731318          | 0.70539183          | 0.17005826            | 0.02362256            | 0.23483502            | 2.61E-05 | -2.81932 | down      | Geranylgeranyl pyrophosphate synthase 10, mitochondrial (Precursor)                | Swissprot |
| c49903.graph_c0 | 1.22643396          | 1.07299037          | 0.71023644          | 0.13171247            | 0.19027842            | 0.4299052             | 0.000968 | -2.00746 | down      | -                                                                                  |           |
| c49905.graph_c0 | 12.8263998          | 7.24606063          | 9.50186952          | 0.60108523            | 0.6784045             | 1.44078687            | 6.61E-09 | -3.44907 | down      | 2-methylene-furan-3-one reductase-like [Solanum lycopersicum]                      | nr        |
| c49926.graph_c0 | 57.8557927          | 36.0168066          | 44.8267022          | 7.845358              | 10.2739566            | 20.7201617            | 0.00034  | -1.84274 | down      | cysteine protease 1 [Brachiaria hybrid cultivar]                                   | nr        |
| c49934.graph_c0 | 4.68899892          | 3.48564947          | 2.4711867           | 1.02952803            | 0.92956728            | 1.38796894            | 0.006283 | -1.67778 | down      | ATP-dependent RNA helicase ded1 [Exophiala dermatitidis NIH/UT8656]                | nr        |
| c49956.graph_c0 | 1.8961795           | 2.16187868          | 3.18566985          | 0.62031747            | 0.35641996            | 1.01234797            | 0.001249 | -1.86779 | down      | GTP cyclohydrolase-2 (Precursor)                                                   | Swissprot |
| c49972.graph_c3 | 2.4993351           | 1.11677237          | 1.69307246          | 0.29557258            | 0.16423035            | 0.24118481            | 0.000691 | -2.92963 | down      | ABC-2 type transporter domain-containing protein [Rozella allomyces CSF55]         | nr        |
| c50003.graph_c0 | 1.08876088          | 1.37532811          | 2.16174514          | 0.01913353            | 0.06910313            | 0.09367682            | 3.61E-08 | -4.67217 | down      | -                                                                                  |           |
| c50016.graph_c1 | 2.67700751          | 1.65323112          | 2.21467668          | 0.64686676            | 0.42831069            | 1.05567599            | 0.001334 | -1.62505 | down      | -                                                                                  |           |
| c50028.graph_c0 | 1.07880956          | 0.77093142          | 0.9179943           | 0.02383373            | 0.21519621            | 0.27227378            | 2.13E-07 | -2.44337 | down      | KDEL-tailed cysteine endopeptidase CEP1 (Precursor)                                | Swissprot |
| c50051.graph_c0 | 8.35023051          | 5.22512795          | 6.78001202          | 2.28765497            | 3.06935079            | 3.73341555            | 0.008148 | -1.17073 | down      | ATP synthase subunit beta, mitochondrial (Precursor)                               | Swissprot |

| #ID             | ctrl 28h-<br>1_FPKM | ctrl 28h-<br>2_FPKM | ctrl 28h-<br>3_FPKM | plasma 28h-<br>1_FPKM | plasma 28h-<br>2_FPKM | plasma 28h-<br>3_FPKM | FDR      | log2FC   | regulated | annotation                                                                 | database  |
|-----------------|---------------------|---------------------|---------------------|-----------------------|-----------------------|-----------------------|----------|----------|-----------|----------------------------------------------------------------------------|-----------|
| c50072.graph_c0 | 0.79382549          | 0.62641818          | 0.70051027          | 0.15913824            | 0.28737382            | 0.31536336            | 0.005392 | -1.48444 | down      | B-box zinc finger; Kinesin protein 1B; FHA domain                          | Pfam      |
| c50080.graph_c0 | 31.2913198          | 20.0318961          | 25.5728286          | 2.2467483             | 3.003893              | 5.18267799            | 1.14E-11 | -2.88835 | down      | carbonyl reductase (NADPH) [Galdieria sulphuraria]                         | nr        |
| c50091.graph_c0 | 3.50396655          | 2.69574781          | 3.30170263          | 0.52810588            | 1.05731891            | 0.78691581            | 1.81E-15 | -2.01027 | down      | -                                                                          | -         |
| c50102.graph_c0 | 4.14940817          | 2.69066382          | 3.54897399          | 0.91318707            | 1.0027974             | 1.59100276            | 9.37E-05 | -1.5736  | down      | protein disulfide isomerase [Rhizoctonia solani 123E]                      | nr        |
| c50104.graph_c0 | 1.26218596          | 1.142653            | 0.99673728          | 0.46580612            | 0.28038617            | 0.47059256            | 0.000146 | -1.49019 | down      | NADP-dependent manic enzyme, chirotopiasuc<br>(Draconis)                   | Swissprot |
| c50106.graph_c0 | 1.10856116          | 0.5550897           | 0.86257709          | 0.18533743            | 0.25101349            | 0.1323296             | 0.0014   | -2.16156 | down      | saccharopepsin [Mucor circinelloides f. circinelloides<br>1006PhL]         | nr        |
| c50116.graph_c0 | 2.8755822           | 1.62787557          | 2.79130914          | 0.81529061            | 0.55767499            | 0.78622875            | 0.000806 | -1.76347 | down      | Multicopper oxidase                                                        | Pfam      |
| c50137.graph_c0 | 1.74134106          | 0.97394221          | 1.07637574          | 0.30486281            | 0.36701671            | 0.3938788             | 0.005145 | -1.8401  | down      | Karyopherin beta [Blumeria graminis s. sp. tritici<br>062211]              | nr        |
| c50150.graph_c0 | 1.15367221          | 0.92534177          | 0.97770673          | 0.36988159            | 0.2652102             | 0.53262416            | 1.52E-06 | -1.39462 | down      | Eukaryotic translation initiation factor 3 subunit A                       | nr        |
| c50153.graph_c1 | 3.1943712           | 1.92432704          | 2.02335974          | 0.54552606            | 0.95775339            | 0.95211529            | 0.009357 | -1.5495  | down      | Polyadenylate-binding protein 2                                            | Swissprot |
| c50311.graph_c0 | 97.0259825          | 109.383295          | 111.84233           | 38.7899494            | 42.5158011            | 34.1825902            | 4.86E-47 | -1.46982 | down      | vegetative incompatibility protein HET-E-1-like<br>[Sesamum indicum]       | nr        |
| c50590.graph_c0 | 57.7019286          | 39.0672224          | 33.6747535          | 114.474056            | 120.879864            | 103.229092            | 3.17E-13 | 1.366327 | up        | uncharacterized protein AUG01500 [Sesamum<br>indicum]                      | nr        |
| c50630.graph_c0 | 116.194377          | 87.6542192          | 70.6331756          | 211.580395            | 212.362054            | 202.327983            | 6.26E-15 | 1.180839 | up        | hypothetical protein AMTR_s00033p00173430<br>[Amborella trichopoda]        | nr        |
| c51165.graph_c0 | 4.30952406          | 4.08949784          | 6.15657895          | 2.31635723            | 1.9813769             | 1.69116768            | 0.000571 | -1.28787 | down      | -                                                                          | -         |
| c51619.graph_c0 | 1.32875411          | 1.4770701           | 0.7914762           | 2.60286824            | 2.9067595             | 3.4653419             | 0.003701 | 1.310857 | up        | hypothetical protein MIMGU_mgv1a023502mg, partial<br>[Erythranthe guttata] | nr        |
| c51753.graph_c0 | 6.0326415           | 3.75336214          | 3.03916039          | 9.74711242            | 8.04638046            | 11.3622345            | 0.002221 | 1.175766 | up        | Putative non-specific lipid-transfer protein AKCS9<br>[Aegilops tauschii]  | nr        |
| c52090.graph_c0 | 3.02120284          | 4.5209642           | 5.19111965          | 0.80865685            | 0.24338044            | 0.73317488            | 4.27E-08 | -2.83811 | down      | hypothetical protein glysoja_014339 [Glycine soja]                         | nr        |
| c52750.graph_c0 | 3.41461514          | 3.45068697          | 1.78738891          | 7.63293249            | 8.452235              | 5.67999707            | 0.000527 | 1.320736 | up        | -                                                                          | -         |
| c53027.graph_c0 | 0.85009914          | 1.18123438          | 0.75954599          | 2.36639535            | 1.83987853            | 2.95007668            | 0.00717  | 1.352242 | up        | -                                                                          | -         |
| c53093.graph_c0 | 1.00414103          | 2.44173911          | 1.12147403          | 3.78516274            | 4.29396682            | 4.35580522            | 0.001814 | 1.438563 | up        | -                                                                          | -         |
| c53169.graph_c0 | 1.31731641          | 2.03382739          | 1.5257342           | 5.60232135            | 4.75180298            | 4.57144847            | 0.004546 | 1.606939 | up        | -                                                                          | -         |

Transcriptomic analysis of seed germination improvement of *Andrographis paniculata* responding to air plasma treatment

Jia-Yun Tong 1\*, Rui He 2\*, Xiao-Ting Tang 2, Ming-Zhi Li 3 and Jing-Lin Wan 4
