# Supplementary material for: Transcriptomic analysis of seed germination improvement of Andrographis paniculata responding to air plasma treatment
Source: PubMed Central journal article supplement (PMC7580921; doi:10.1371/journal.pone.0240939), 2020-10-22
Supplement: pone.0240939.s010.pdf [file pone.0240939.s010.pdf]

**S8 Table. Differentially expressed genes at 48 HAS (plasma vs. control).**

| #ID             | control-1<br>FPKM | control-2<br>FPKM | control-3<br>FPKM | plasma-1<br>FPKM | plasma-2<br>FPKM | plasma-3<br>FPKM | FDR      | log2FC   | regulated | nr_annotation                                                                                      |
|-----------------|-------------------|-------------------|-------------------|------------------|------------------|------------------|----------|----------|-----------|----------------------------------------------------------------------------------------------------|
| c19480.graph_c0 | 1.25100608        | 4.72859349        | 5.95669365        | 10.9602539       | 16.2753319       | 15.4620877       | 4.79E-05 | 1.84687  | up        | PREDICTED: peroxidase 44 [Sesamum indicum]                                                         |
| c25604.graph_c0 | 37.5406524        | 34.5961352        | 27.3256807        | 16.5850452       | 17.8226479       | 14.2264363       | 0.000503 | -1.01703 | down      | PREDICTED: anthocyanidin 3-O-glucoside 2'''-O-xylosyltransferase-like isoform X1 [Sesamum indicum] |
| c27182.graph_c0 | 16.7837227        | 15.1409018        | 13.1461702        | 2.38399381       | 8.61278114       | 6.20061596       | 0.002597 | -1.39725 | down      | PREDICTED: heme oxygenase 1, chloroplastic-like [Sesamum indicum]                                  |
| c27911.graph_c0 | 0.39752941        | 1.74720303        | 0.83939922        | 3.04441907       | 4.98113118       | 3.25068694       | 0.009305 | 1.932924 | up        | PREDICTED: protein NRT1/ PTR FAMILY 6.3-like [Sesamum indicum]                                     |
| c44035.graph_c0 | 14.4322219        | 10.677167         | 24.4602305        | 0.22402745       | 0.30852889       | 0.19933827       | 4.71E-07 | -6.07538 | down      | hypothetical protein EPUS_08/6/ [Endocarpon pusillum]                                              |
| c49500.graph_c8 | 11.6011811        | 11.4904741        | 12.0181658        | 3.64004001       | 6.25414231       | 5.71568066       | 0.000838 | -1.16612 | down      | PREDICTED: tyrosine/DOPA decarboxylase 1-like [Sesamum indicum]                                    |
| c49929.graph_c0 | 0.31365482        | 0.98089936        | 0.65380372        | 5.28457191       | 3.03842786       | 6.37004768       | 0.000824 | 2.93931  | up        | -                                                                                                  |
| c50472.graph_c0 | 7.07776019        | 16.8595447        | 15.3995041        | 35.4457847       | 41.3926504       | 38.2087696       | 3.92E-13 | 1.562901 | up        | PREDICTED: 1-aminocyclopropane-1-carboxylate oxidase homolog 1-like [Sesamum indicum]              |
| c51145.graph_c0 | 4.25674993        | 10.2899896        | 10.8026019        | 19.5678559       | 24.7631648       | 25.3685886       | 0.000381 | 1.470417 | up        | PREDICTED: proline-rich protein 3 [Sesamum indicum]                                                |

Transcriptomic analysis of seed germination improvement of *Andrographis paniculata* responding to air plasma treatment

Jia-Yun Tong 1\*, Rui He 2\*, Xiao-Ting Tang 2, Ming-Zhi Li 3 and Jing-Lin Wan 4
